# Supplementary material
Source: PubMed Central journal article supplement (PMC10335360)
Supplement: NIHMS1882252-supplement-1.pdf [file NIHMS1882252-supplement-1.pdf]

**SUPPORTING DOCUMENTS for:**

**A therapeutically targetable TAZ-TEAD2 pathway drives the growth of hepatocellular carcinoma via ANLN and KIF23**

Yoshinobu Saito, Dingzi Yin, Naoto Kubota, Xiaobo Wang, Aveline Filliol, Helen Remotti, Ajay Nair, Ladan Fazlollahi, Yujin Hoshida, Ira Tabas, Kirk J. Wangensteen, Robert F. Schwabe

**TABLE OF CONTENTS:**

- 1. SUPPLEMENTARY FIGURES 1-11 AND SUPPLEMENTARY FIGURE LEGENDS**
- 2. SUPPLEMENTARY MATERIAL AND METHODS**
- 3. SUPPLEMENTARY TABLES 1-4**

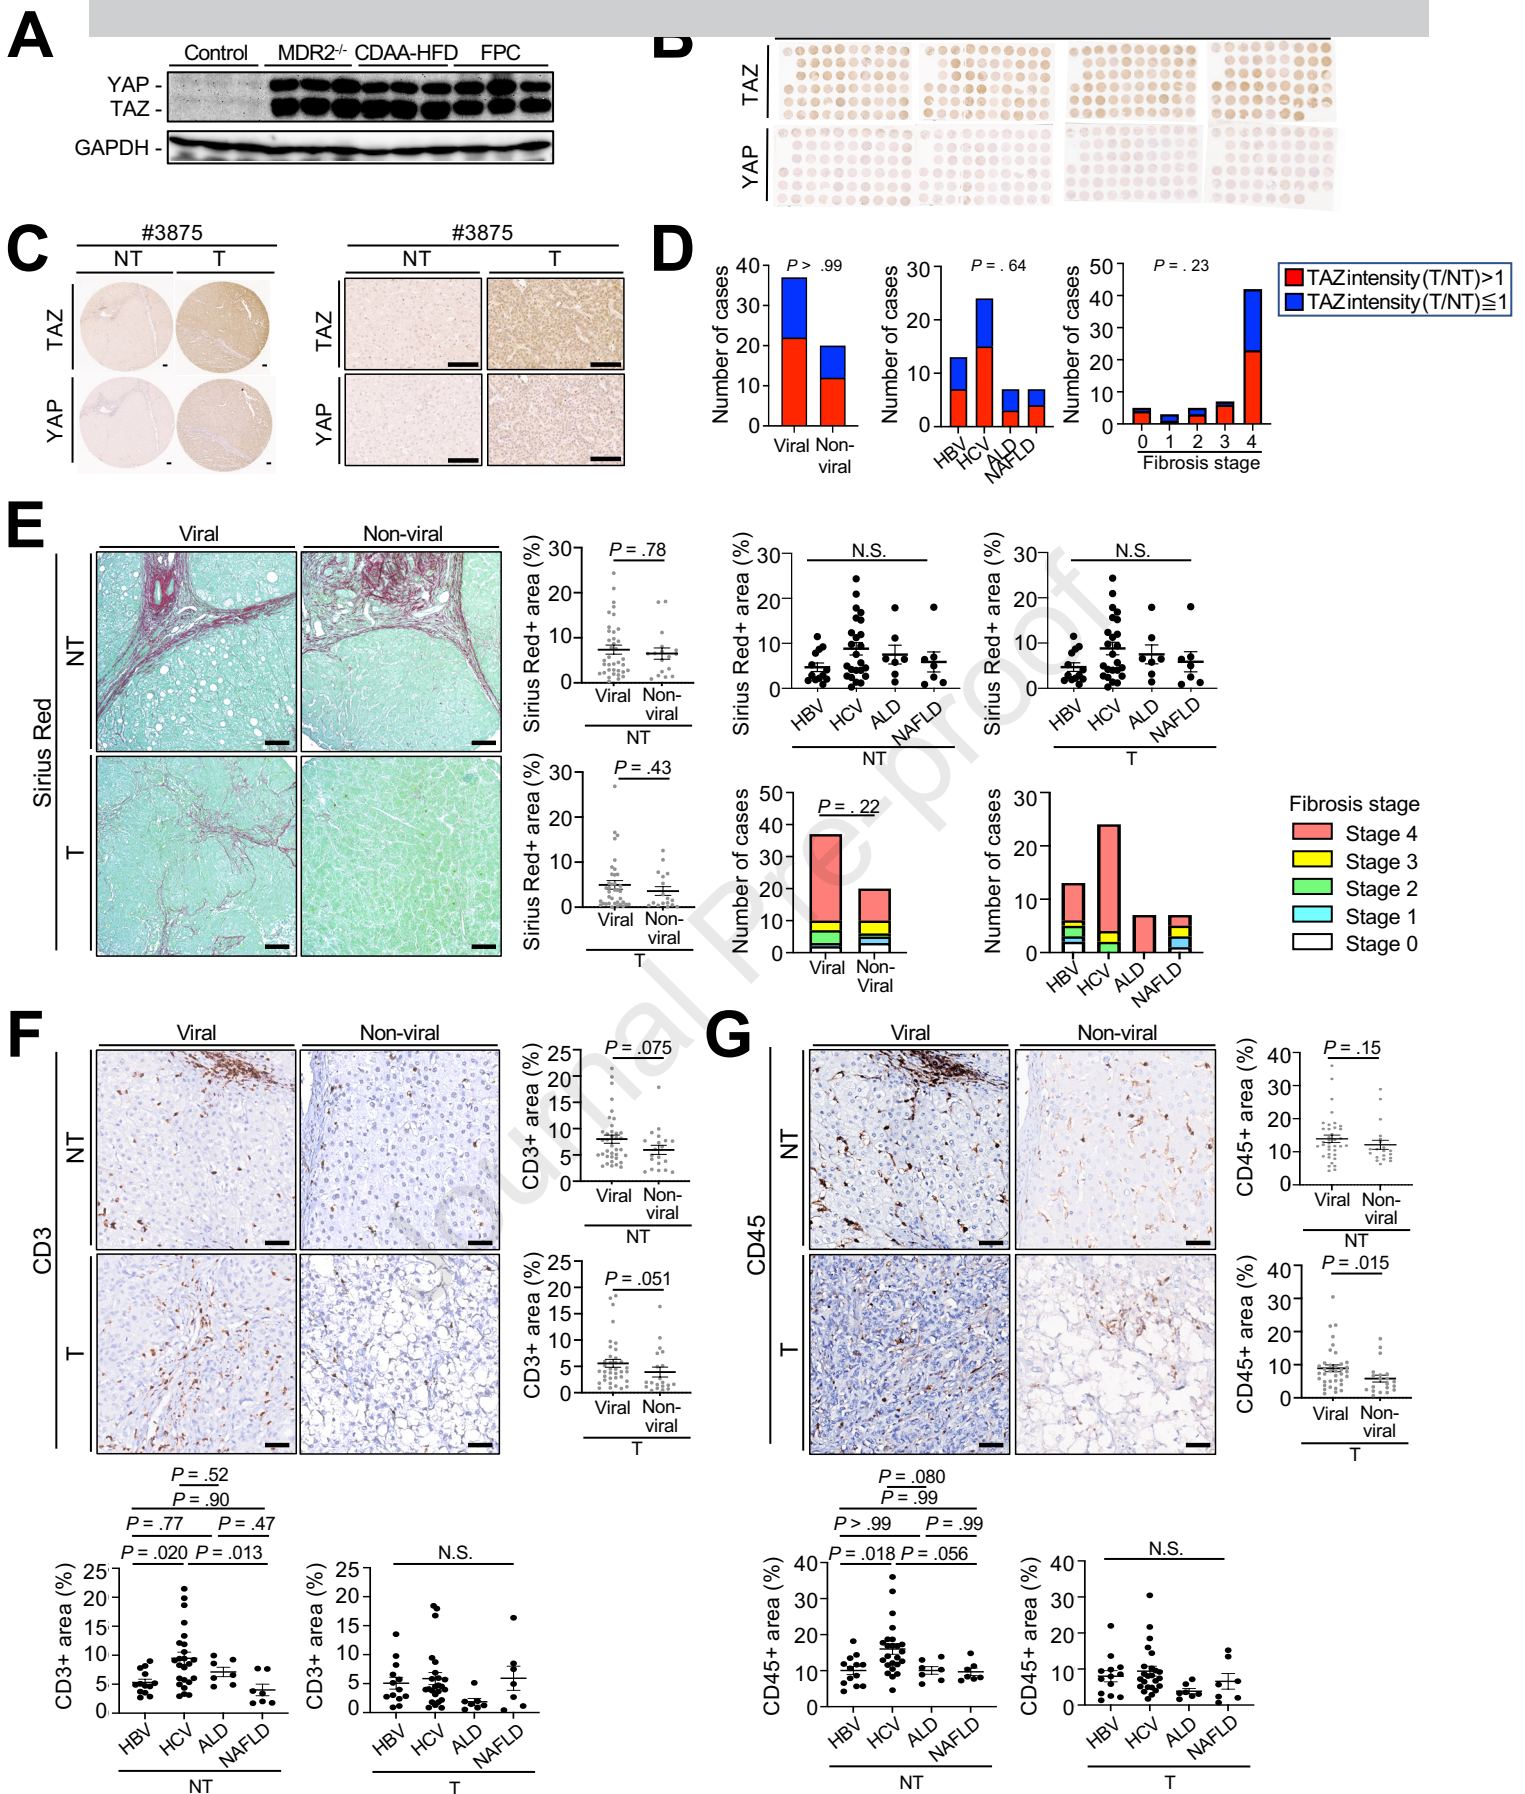

**Supplementary Figure 1. Determination of TAZ and YAP expression in mice and patients with HCC, including characterization of human TMA HCC cases.** **A.** Liver lysates of HCC from mice fed with FPC diet for 13 months, CDAA-HFD diet 6-8 months and with normal diet at the age of 12-15 months were used for analysis. **B-D.** Representative images of TAZ+ / YAP+ liver from a human HCC TMA with lower (**B**) and higher magnification (**C**) for YAP and TAZ staining as well as quantification of TAZ intensity with etiologies and fibrosis stage. Chi-square test. (**D**). **E.** Representative images and quantification of Sirius Red-positive area, and fibrosis stage in patient with different underlying etiologies in the TMA. Chi-square test for Viral vs Non-viral with fibrosis stages. **F.** Representative images and quantification of the CD3-positive area and analysis of the CD3-positive area in patients with different underlying etiologies in the TMA. **G.** Representative images and quantification of the CD45-positive area and analysis of the CD45-positive area in patients with different underlying etiologies in the TMA. Scale bar (**C,E,F,G**): 100  $\mu$ M.



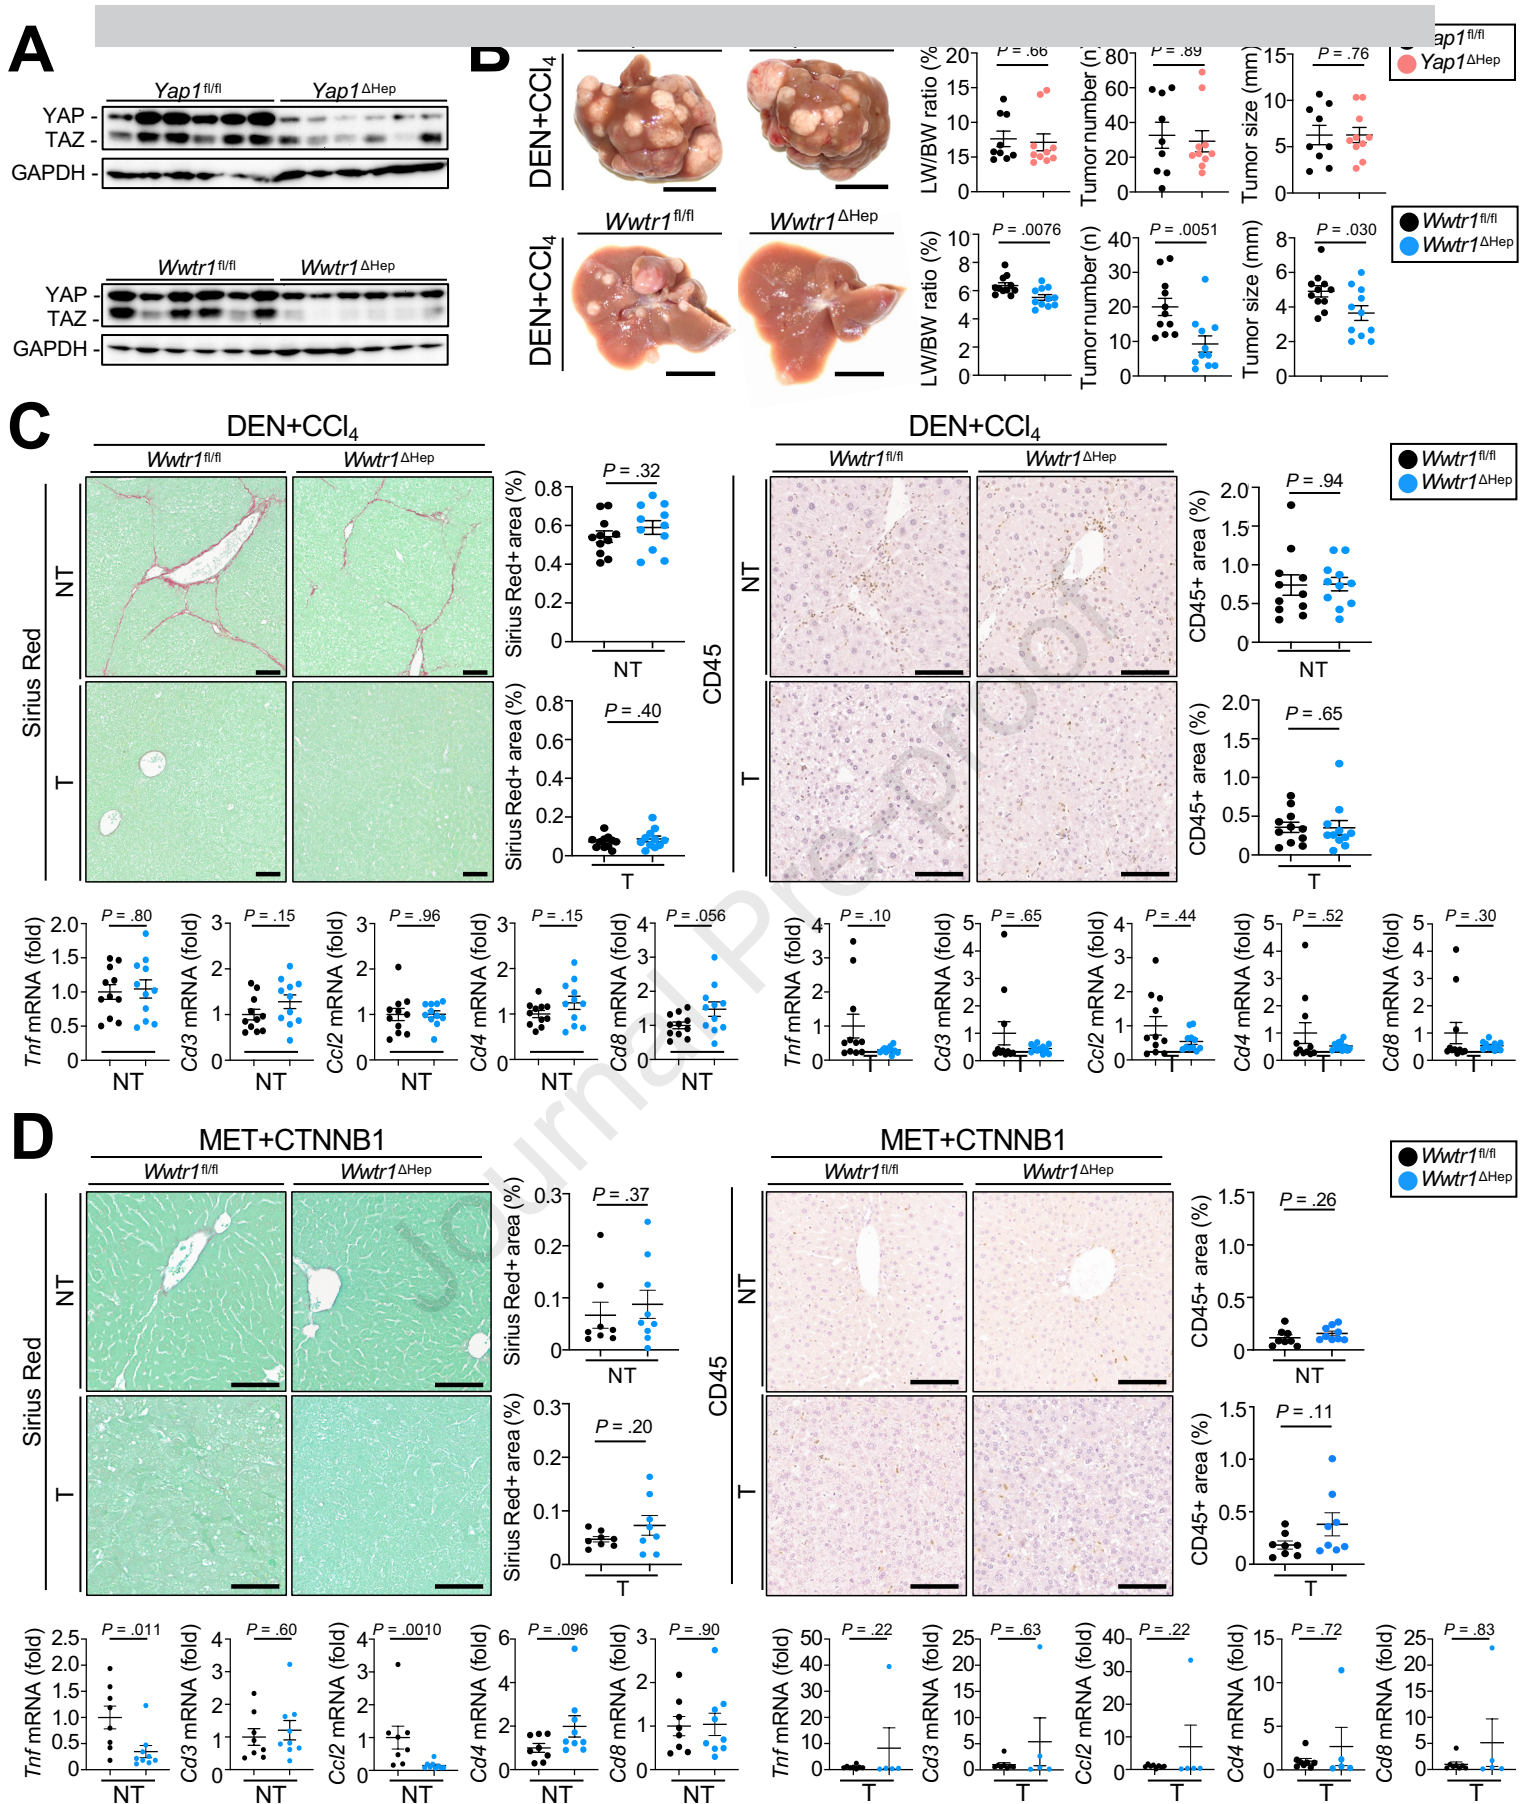

**Supplementary Figure 2 TAZ and YAP expression, function in murine HCC including characterization of liver fibrosis and inflammation.** **A.** Liver lysates of HCC from mice subjected with DEN+CCl<sub>4</sub> induced HCC models after 15 times CCl<sub>4</sub> injection were used for analysis of TAZ and YAP expression in *Yap1*<sup>fl/fl</sup> and *Yap1*<sup>ΔHep</sup> and *Wwtr1*<sup>fl/fl</sup> and *Wwtr1*<sup>ΔHep</sup> mice. **B.** Effects of hepatocyte-specific deletion of YAP (n=9 *Yap1*<sup>fl/fl</sup> and n=11 *Yap1*<sup>ΔHep</sup> mice) and TAZ (n=11 *Wwtr1*<sup>fl/fl</sup> and n=11 *Wwtr1*<sup>ΔHep</sup> mice) on DEN+CCl<sub>4</sub>-induced HCC development as shown by representative images, LW/BW ratio, tumor number and tumor size. **C,D.** Representative images and quantification of Sirius Red and CD45-positive area as well as mRNA expression levels of *Cd3*, *Cd4*, *Cd8*, *Tnf* and *Ccl2* in non-tumor (NT) and tumor (T) areas in mice with DEN+CCl<sub>4</sub>-induced HCC (**C**) and MET+CTNNB1-S45Y-induced HCC (**D**). RNA was isolated from the livers of mice shown in **Fig.1F** (**C**) and **Fig.1G** (**D**) respectively. Of note, **Suppl.Fig.2D** has smaller sample numbers in the tumor of *Wwtr1*<sup>ΔHep</sup> mouse group compared with **Fig.1G** as some mice did not develop macroscopic and/or microscopic tumors. Scale bar (**B**): 1 cm, (**C-D**): 100 μm.

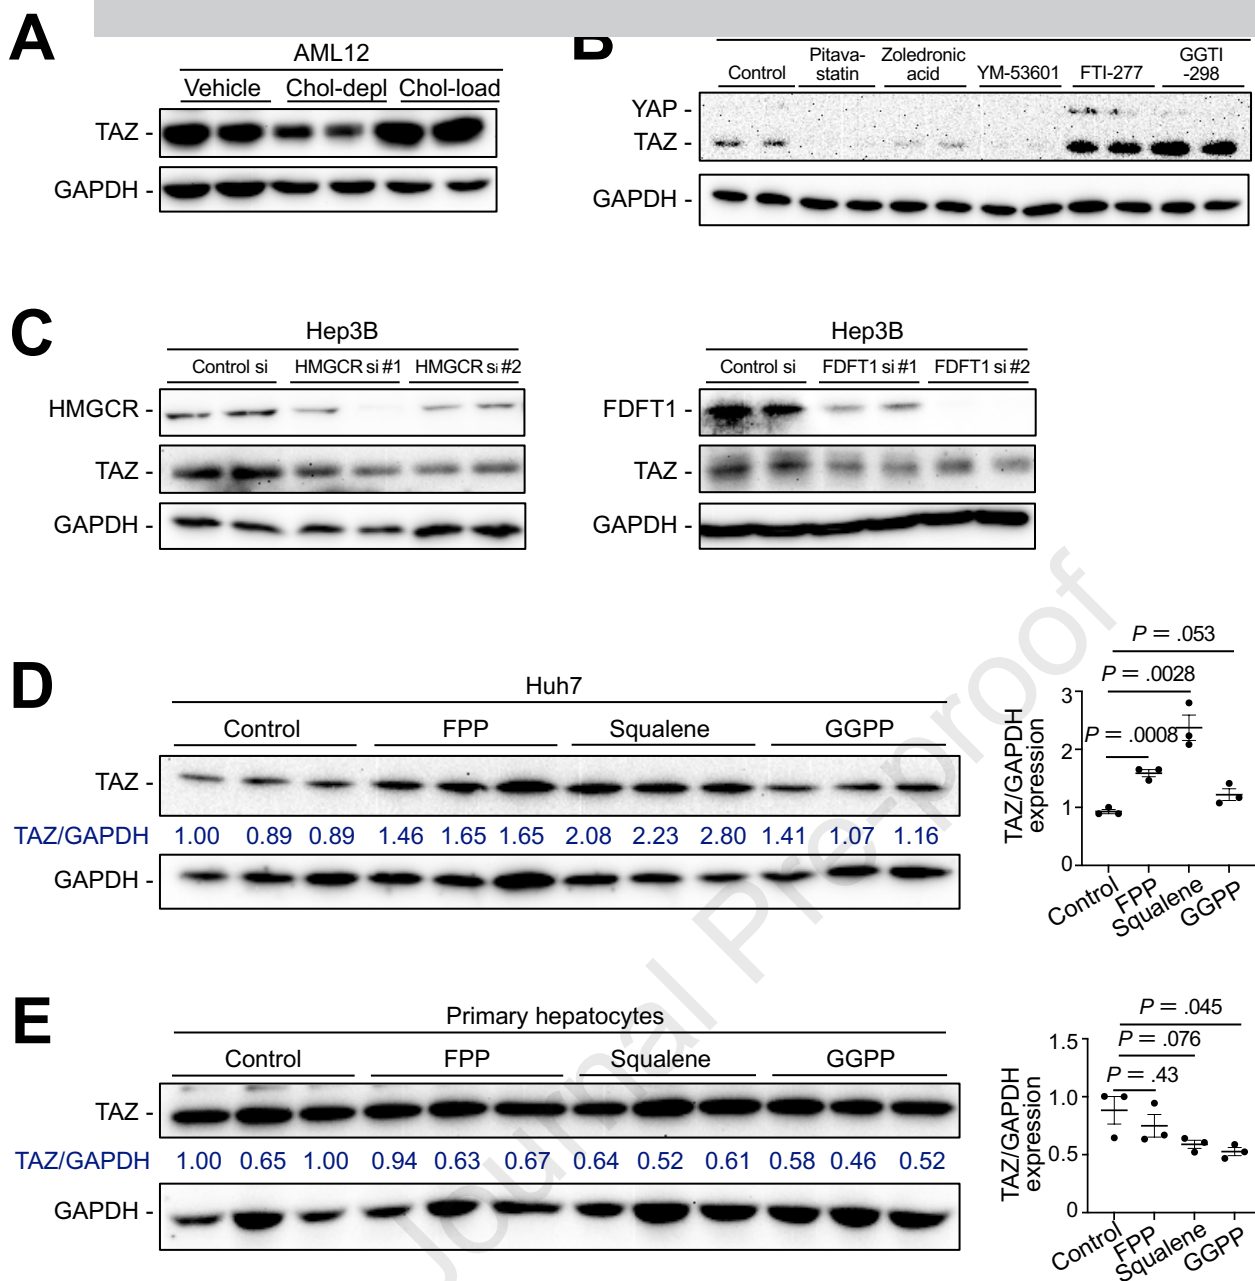

**Supplementary Figure 3. The mevalonate-squalene-cholesterol biosynthesis pathway is active in HCC cells, but not in primary murine hepatocytes.** **A.** AML12 cells were treated with vehicle and liposome (Chol-depl) for 36 hours and with liposome for 24 hours followed by cholesterol-enriched liposome 12 hours (Chol-load). **B.** Expression of TAZ/YAP and GAPDH was assessed by western blotting. PLC/PRF/5 cells were treated with mevalonate pathway inhibitors for 48 hours. **C.** Expression of HMGC, FDFT1 and GAPDH was assessed by western blotting. Hep3B cells were treated with HMGC siRNA and Hep3B. **D,E** Huh7 and primary hepatocytes were treated with mevalonate pathway substrates, 10 $\mu$ M FPP, Squalene and GGPP for 24 hours. TAZ expressions were assessed by western blotting and their quantification.

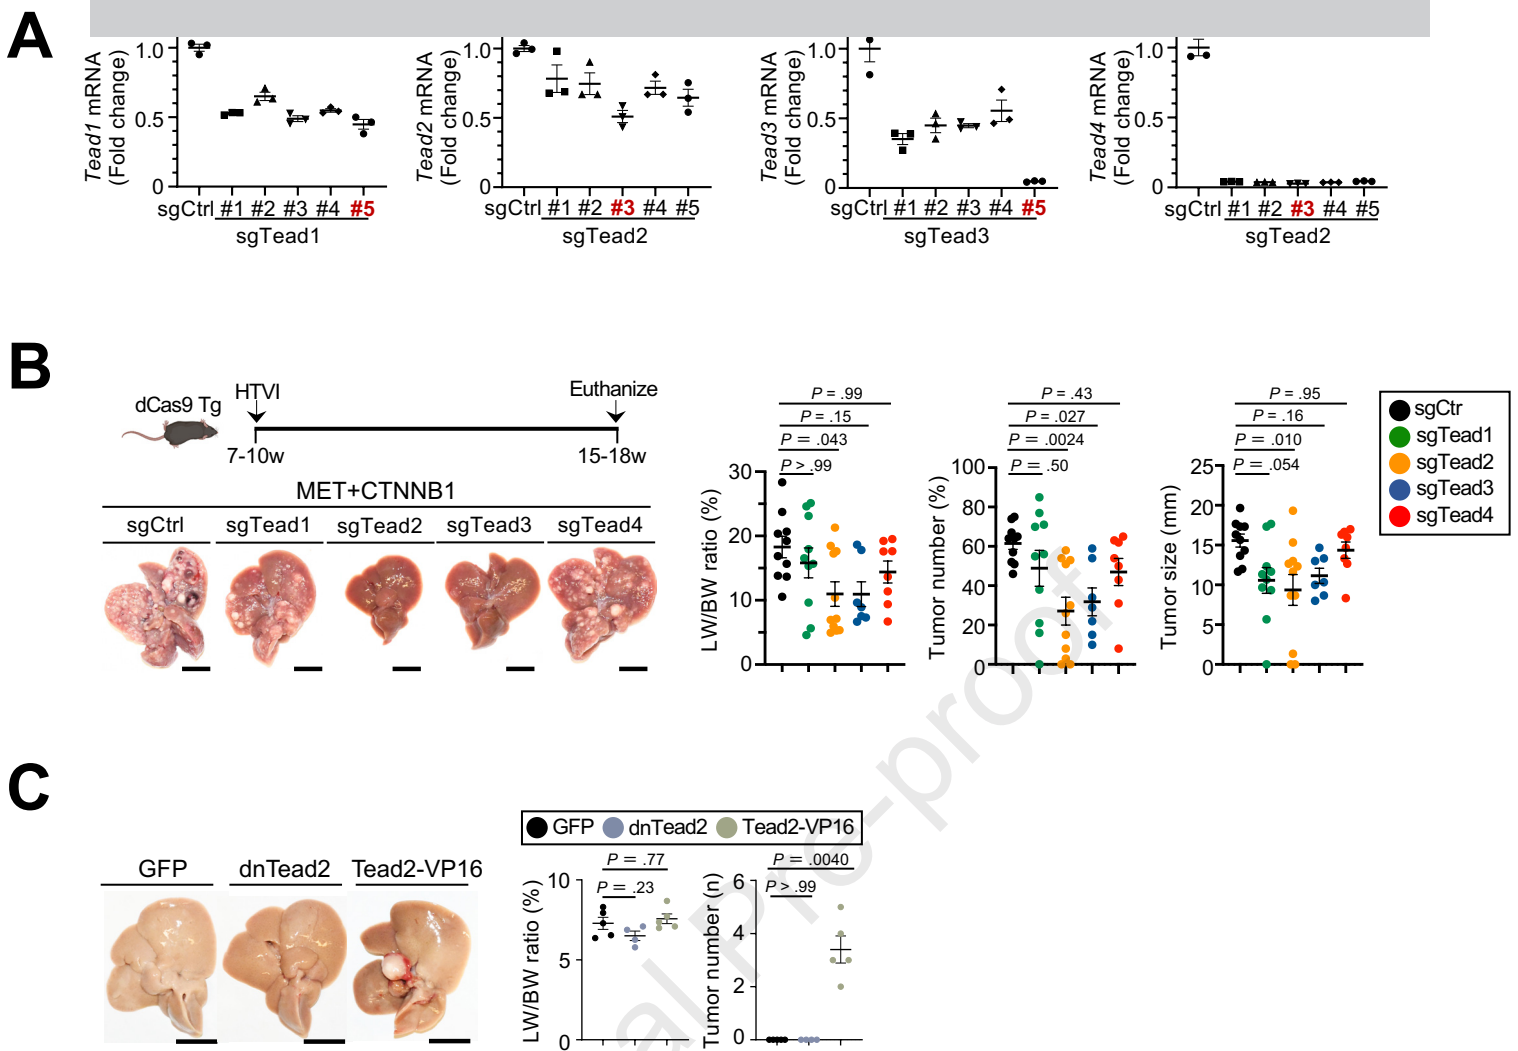

**Supplementary Figure 4. Determination of TEAD function in HCC development by CRISPRi and overexpression. A.** dCas9 Tg murine HCC lines got transfected with U6-sgCtrl, and 5 gRNAs for Tead1/Tea2/Tea3/Tea4 for 48 hours. Tead1-4 mRNA expression levels. **B.** Livers from dCas9 transgenic mice, subjected to HTVI of MET-sgCtrl/Tea1/Tea2/Tea3/Tea4 and CTNNB1-S45Y plasmids, were analyzed 8 weeks after HTVI for HCC development. Representative images of the mouse livers and assessment of LW/BW ratio, tumor number, tumor size (n=10 sgCtrl, n=10 sgTead1, n=11 sgTead2, n=7 sgTead3, n=8 sgTead4 mice). **C.** Livers from C57BL/6J mice subjected with HTVI of GFP, dnTead2 and Tead2-VP16 plasmids followed by FPC diet treatment for 4 months were collected and analyzed. Representative images, liver body weight ratio and tumor number. **C.** Livers from *Wwtr1<sup>fl/fl</sup>* or *Wwtr1<sup>ΔHep</sup>* mice in DEN+CCl<sub>4</sub>-induced HCC model were collected and analyzed after 7 times CCl<sub>4</sub> injection (before tumorigenesis). Representative images of immunohistochemistry for Ki67 and their quantification. Scale bar (**B,C**): 1 cm

**A**TCGA-LIHC (n=359)  
(U.S.)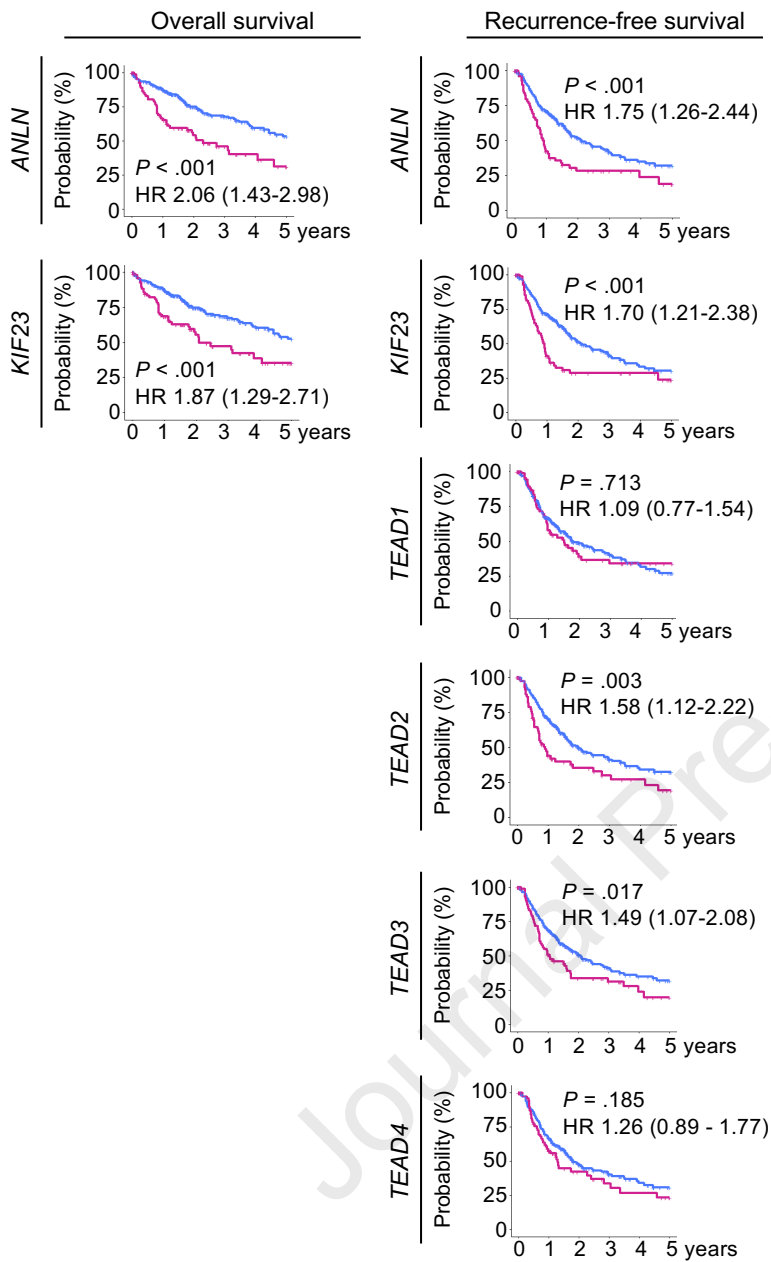**B**ICGC-LIRI-JP (n=232)  
(Japan)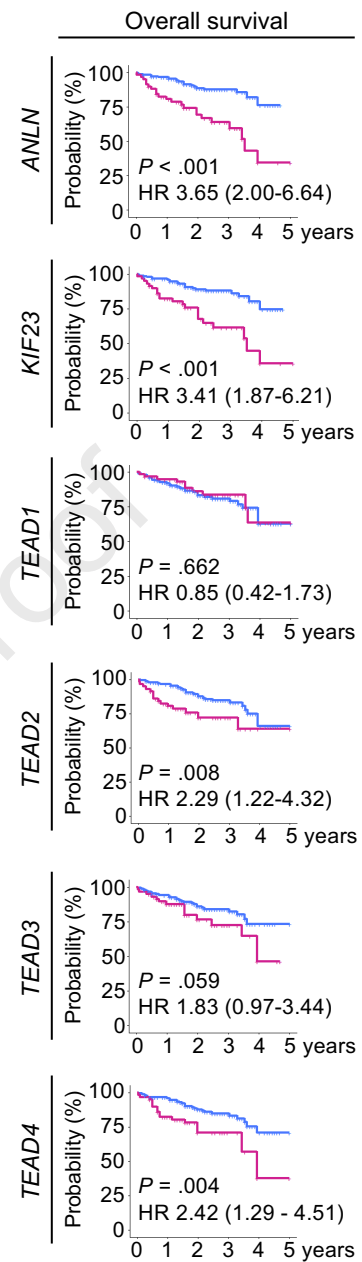

**Supplementary Figure 5. Prognostic association of TEAD-related genes. A-B.** High expression of TEAD-related genes (defined by top quartile cut-off) was evaluated for its prognostic association in two HCC patient cohorts, the TCGA-LIHC (A) and ICGC-LIRI-JP (B). See Methods section for further details.



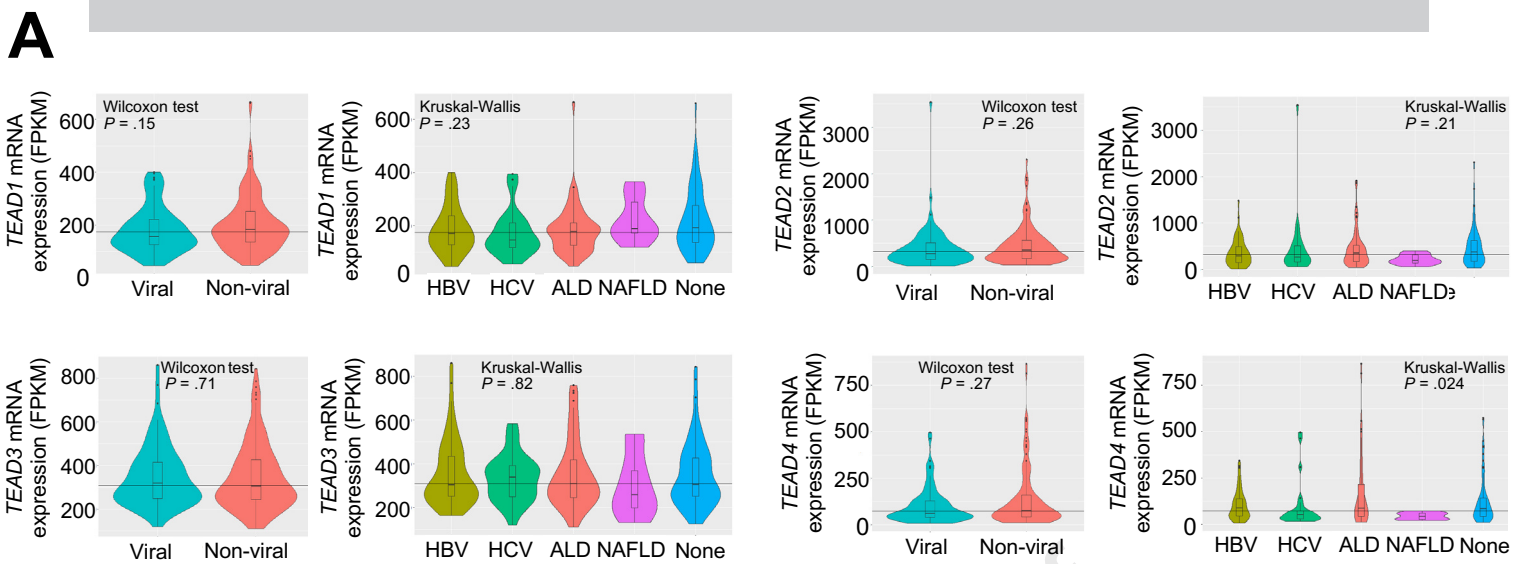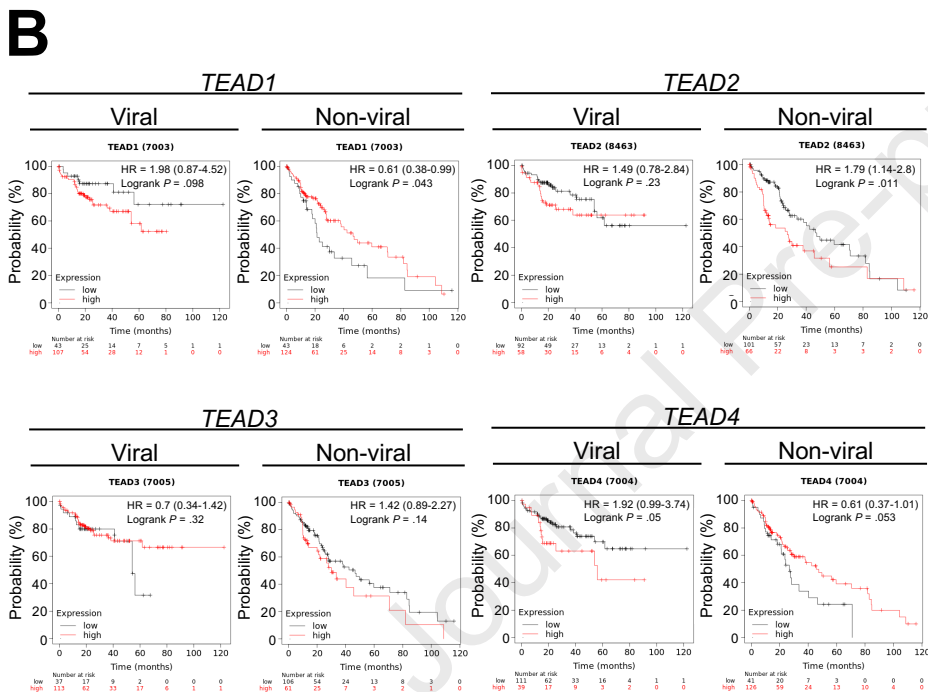

**Supplementary Figure 6. TEADs expression and survival of HCC patients among etiologies. A.** 225 patients from TCGA-LIHC with RNA-seq data were analyzed for expression of *TEAD1/TEAD2/TEAD3/TEAD4* mRNA expression stratified by history of HCC risk factors hepatitis B (HBV,  $n=55$ ), hepatitis C (HCV,  $n=26$ ), alcohol consumption (ALD,  $n=60$ ), non-alcoholic fatty liver disease (NAFLD,  $n=10$ ) or no history of primary risk factor (none,  $n=74$ ). **B.** Effect of *TEAD1/TEAD2/TEAD3/TEAD4* expression on patient survival of HCC patients from the TCGA-LIHC cohort, stratified by etiology of viral ( $n=153$ ) and von-viral ( $n=169$ ) (using <https://kmplot.com/analysis/>).

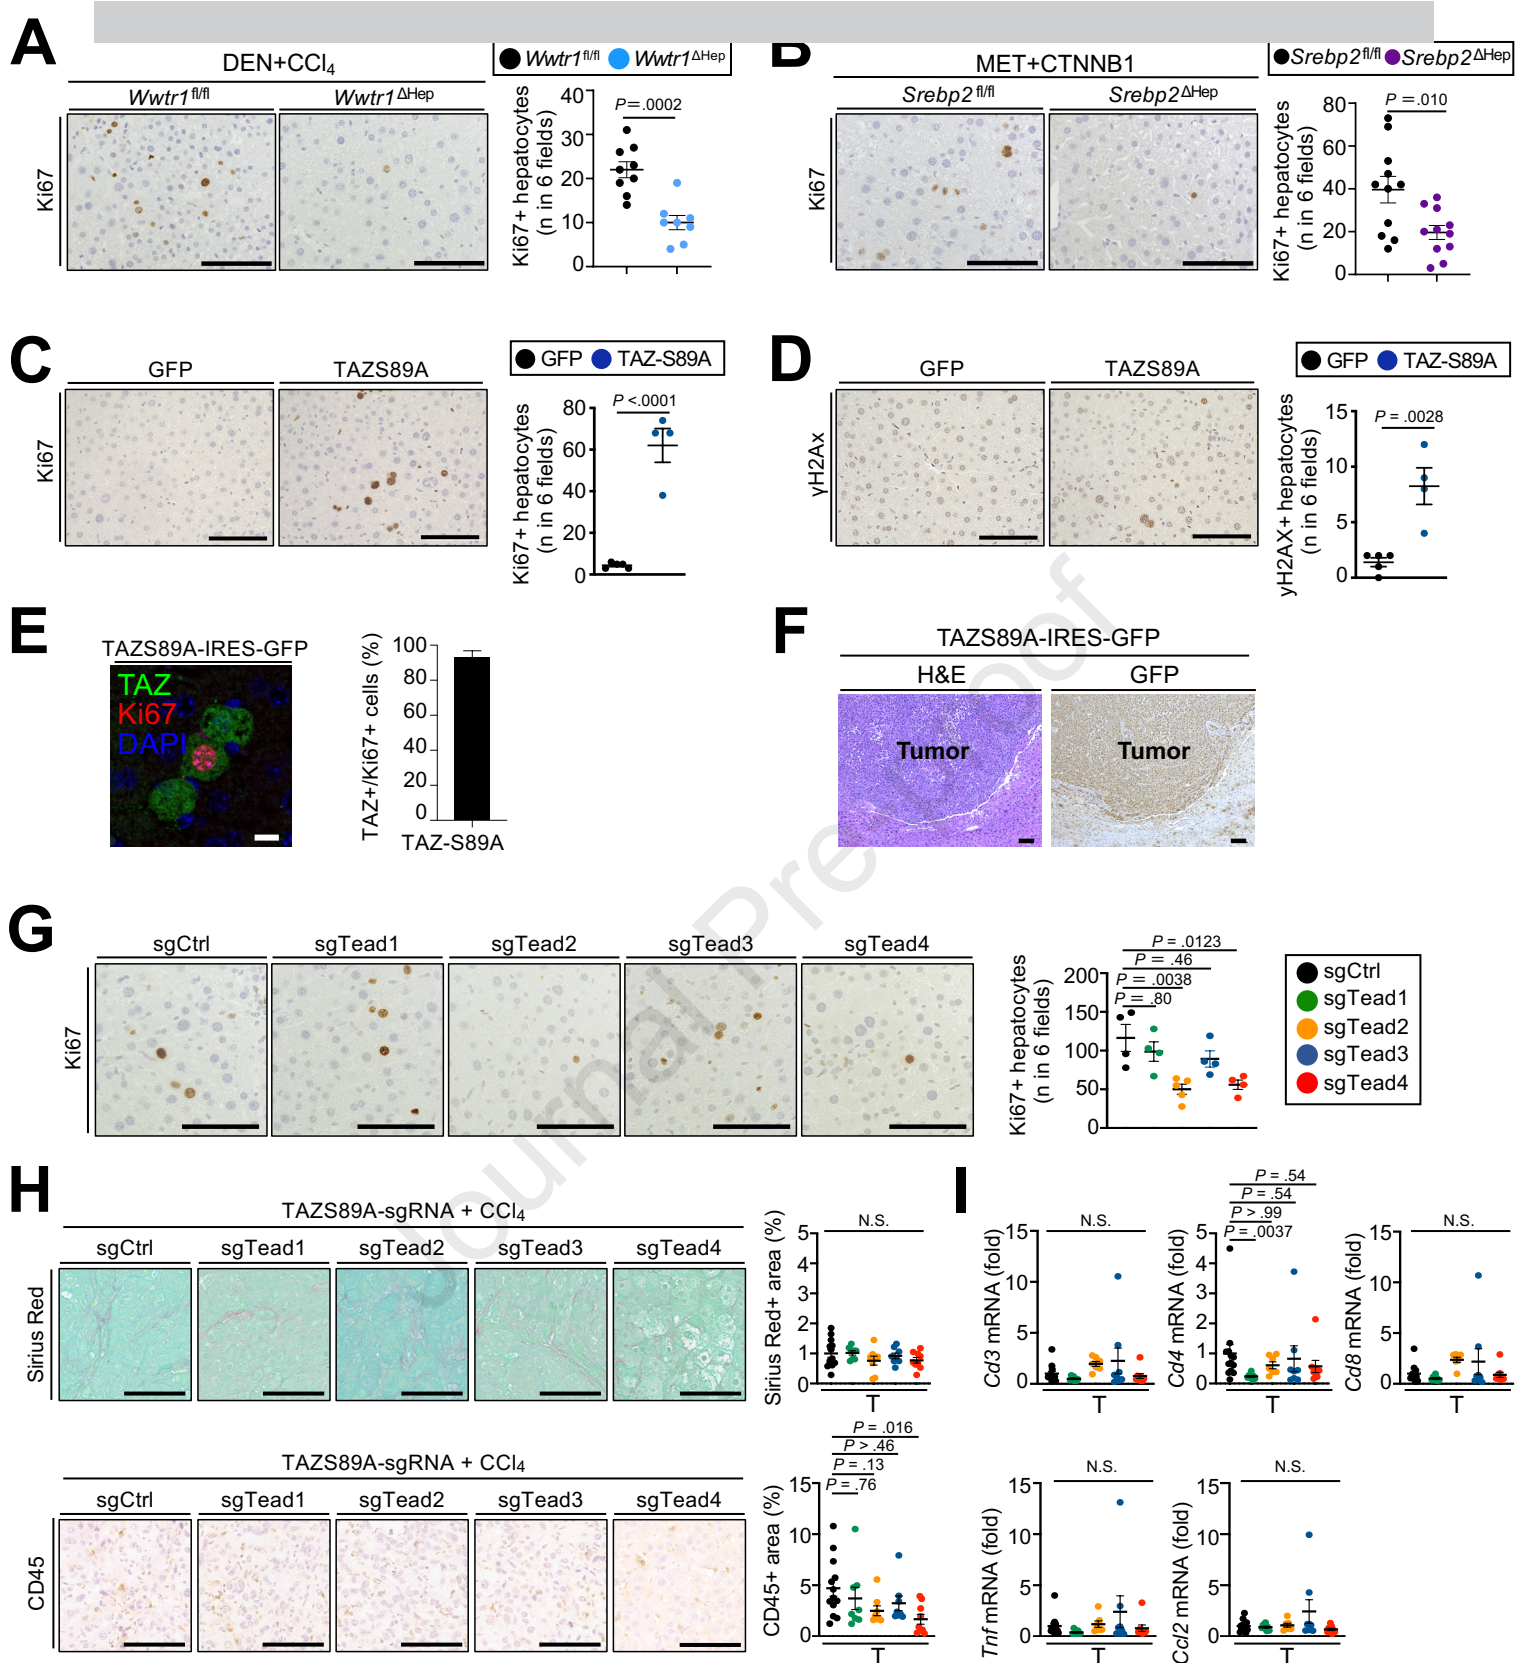

**Supplementary Figure 7. The SREBP2-TAZ-Tead2 pathway induce proliferation without altering fibrosis or inflammation.** **A.** Livers from *Wwtr1*<sup>fl/fl</sup> or *Wwtr1*<sup>ΔHep</sup> mice in DEN+CCl<sub>4</sub>-induced HCC model were collected and analyzed after 7 times CCl<sub>4</sub> injection (before tumorigenesis). Representative images of immunohistochemistry for Ki67 and their quantification. **B.** Evaluation of proliferation by Ki67 staining in livers from MET+CTNNB1S45Y-induced HCC model 4 weeks after HTVI in the presence or absence of *Srebp2*. **C-D.** Livers from mice subjected with HTVI of EF1a-GFP or EF1a-TAZS89A-IRES-GFP plasmid were collected and analyzed 4 weeks after HTVI. Representative image of immunohistochemistry and quantification for Ki67 (**C**) and  $\gamma$ H<sub>2</sub>AX (**D**). **E.** A representative image of immunofluorescent staining for GFP (TAZ) and Ki67 and the percentage of GFP(TAZ) +, Ki67+ double-positive hepatocytes among Ki67+ hepatocytes. **F.** Representative image of HE staining and immunohistochemistry of GFP for TAZS89A-IRES-GFP induced HCC. **G.** dCas9 transgenic mice were subjected with HTVI of EF1a-TAZS89A-U6-sgCtrl/Tead1/Tead2/Tead3/Tead4 plasmids followed by CCl<sub>4</sub> injection twice a week for 3 three weeks. The number of Ki67-positive hepatocytes was analyzed (n=5 sgCtrl, n=4 sgTead1, n=5 sgTead2, n=4 Tead3 and n=4 Tead4 mice). **H-I.** Representative images and quantification of Sirius Red- and CD45-positive area (H) and mRNA expression levels of *Cd3*, *Cd4*, *Cd8*, *Tnf* and *Ccl2* in non-tumor (NT) and tumor (T) areas from livers of mice shown in **Fig.3B** (H, n=13 sgCtrl, n=8 sgTead1, n=7-9 sgTead2, n=8 sgTead3 and n=9 sgTead4 mice). Scale bar (**A,B,C,D,F,G,H**): 100  $\mu$ m, (**E**): 10  $\mu$ m.



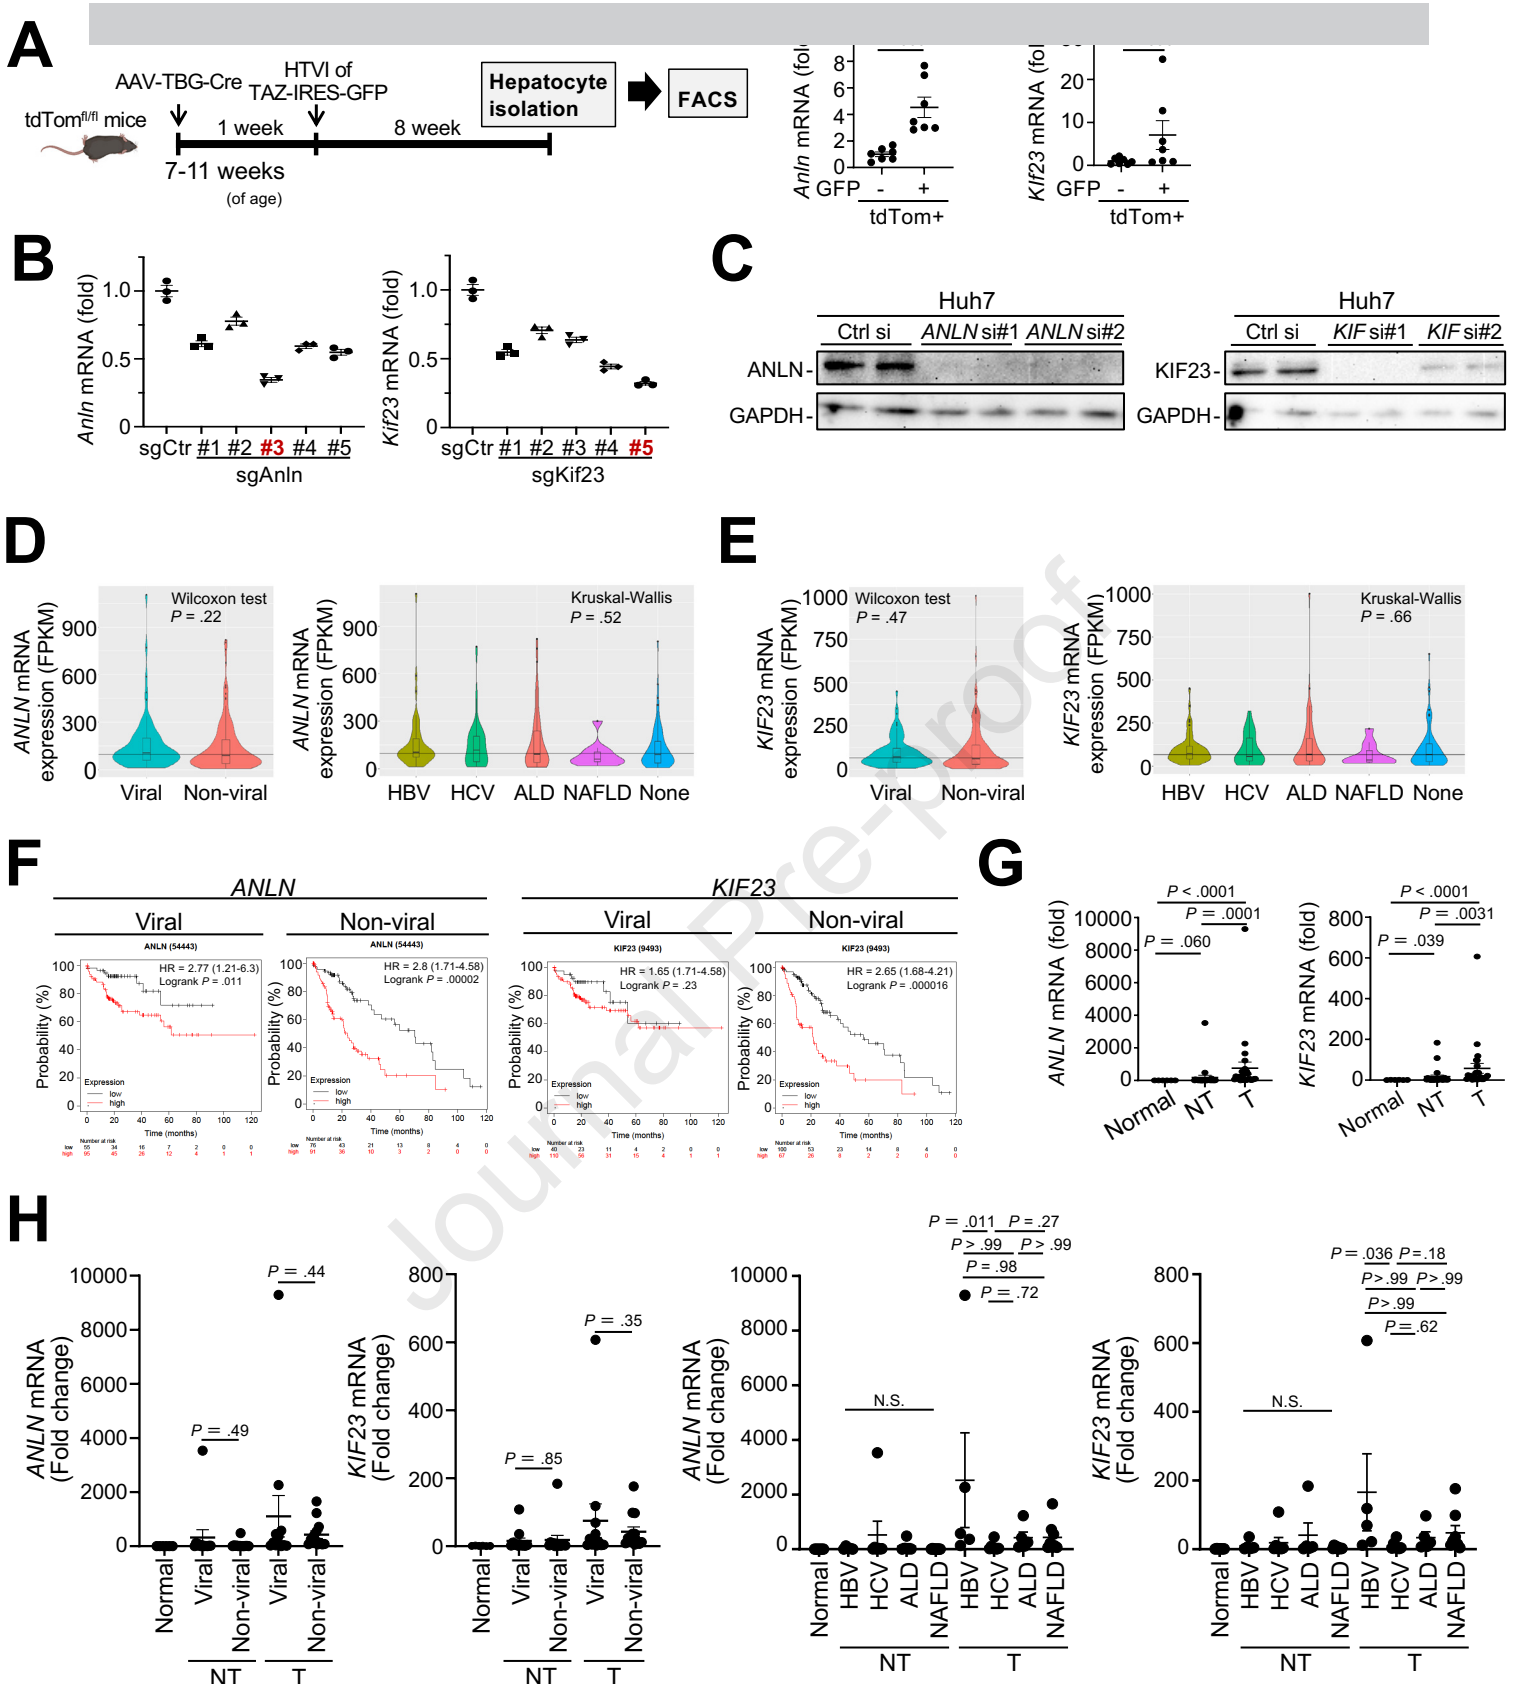

**Supplementary Figure 8. Knockdown of *ANLN* or *KIF23* in human HCC lines and their mRNA expressions in HCC patients. A.** tdTom floxed reporter mice were injected with AAV-TBG-Cre followed by HTVI of TAZ-IRES-GFP plasmid. Hepatocytes isolated from the liver. 8 weeks after HTVI to sort tdTom<sup>+</sup>/GFP<sup>-</sup> or tdTom<sup>+</sup>/GFP<sup>+</sup> using FACS. *Anln* and *Kif23* mRNA expression levels of sorted hepatocytes. **B.** dCas9 Tg murine HCC lines were transfected with U6-sgCtrl, sgAnln#1-5 or sgKif23#1-5 for 48 hours. *Anln* and *Kif23* mRNA expression levels. **C.** Western blot for *ANLN* and *KIF23* after *ANLN* or *KIF23* siRNA transfection in Huh7 cells for 72 hours. **D-E.** 225 patients from TCGA-LIHC with RNA-seq data were analyzed for expression of *ANLN* (C) and *KIF23* (D) mRNA expression stratified by history of HCC risk factors hepatitis B (HBV, n=55), hepatitis C (HCV, n=26), alcohol consumption (ALD, n=60), non-alcoholic fatty liver disease (NAFLD, n=10) or no history of primary risk factor (none, n=74). **F.** Effect of *ANLN* and *KIF23* expression on patient survival of HCC patients from the TCGA-LIHC cohort, stratified by etiology of viral (n=153) and von-viral (n=169) (using <https://kmplot.com/analysis/>). **G-H.** RNA was extracted from the livers of thirty-one cases among human TMA samples shown in Fig.1C. Expression of *ANLN* and *KIF23* mRNA was compared between normal liver (n=6), non-tumor liver (NT, n=25) and tumor liver (T, n=25) (F) and further stratified by HCC risk factor history (G, n=5 HBV, n=7 HCV, n=5 ALD, n=8 NAFLD).

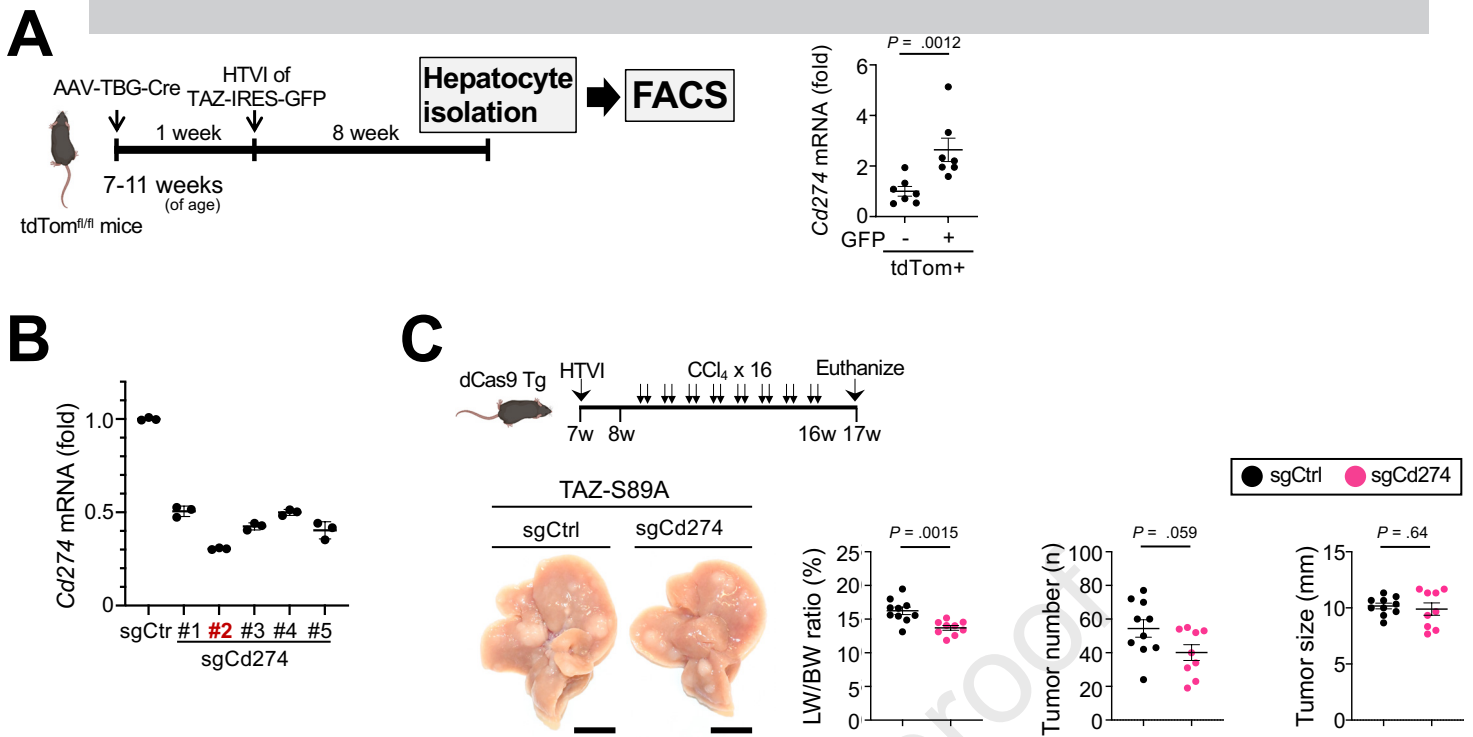

**Supplementary Figure 9. TAZ upregulates PD-L1 in tumor cells.** **A.** tdTom floxed reporter mice were injected with AAV-TBG-Cre followed by HTVI of TAZ-IRES-GFP plasmid. Hepatocytes isolated from the liver. 8 weeks after HTVI to sort tdTom<sup>+</sup>/GFP<sup>-</sup> or tdTom<sup>+</sup>/GFP<sup>+</sup> using FACS. *Cd274* mRNA expression levels of sorted hepatocytes. **B.** dCas9 Tg murine HCC lines got transfected with U6-sgCont, and 5 gRNAs for *Cd274* for 48 hours. *Cd274* mRNA expression levels. **C.** Livers from dCas9 transgenic mice subjected with HTVI of TAZS89A-sgCtrl/*Cd274* plasmids followed by CCl<sub>4</sub> injection twice a week for 8 weeks were collected and analyzed. Representative images of the mouse livers and assessment of LW/BW ratio, tumor number and tumor size (n=10 sgCtrl, n=9 sgCd274 mice). Scale bar (**C**): 1 cm.

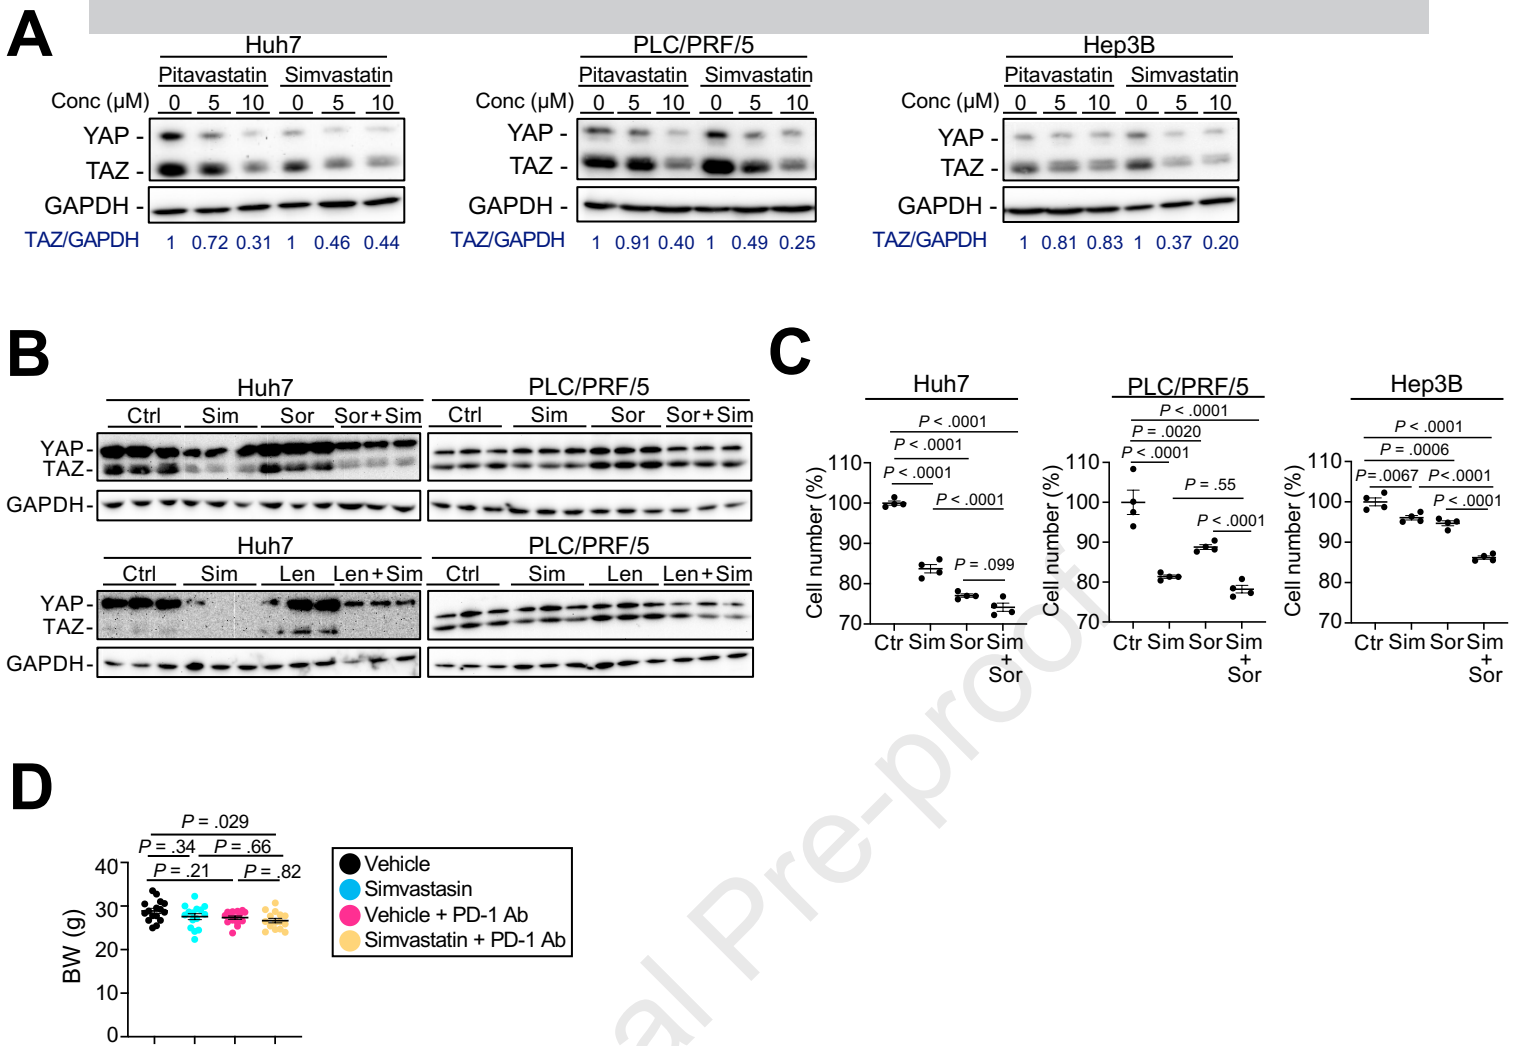

**Supplementary Figure 10. Targeting mevalonate-TAZ pathway for HCC therapy.** **A.** YAP and TAZ expression in HCC lines Huh7, PLC/PRF/5 and Hep3B treated with indicated concentrations of pitavastatin and simvastatin for 48 hours. **B, C.** Simvastatin with or without sorafenib or lenvatinib treatment for 24 hours in Huh7, PLC/PRF/5 and Hep3B. Expression of TAZ and YAP assessed by western blotting (**B**). Relative cell viability (**C**). **D.** BW of mice from Fig.5D. Ctrl, Control; Sim, Simvastatin; Sor, Sorafenib; Len, Lenvatinib.

**A**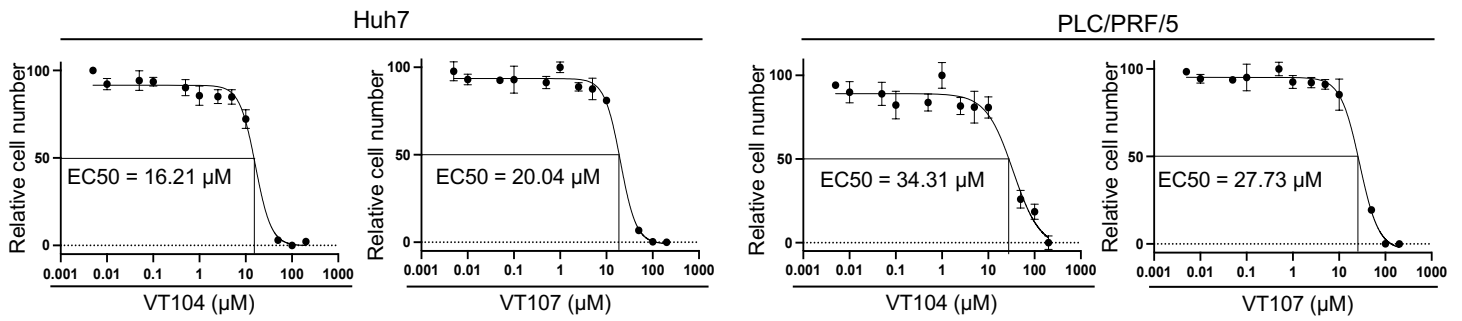**B**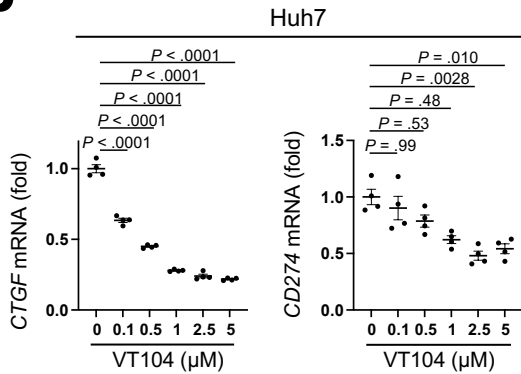**C**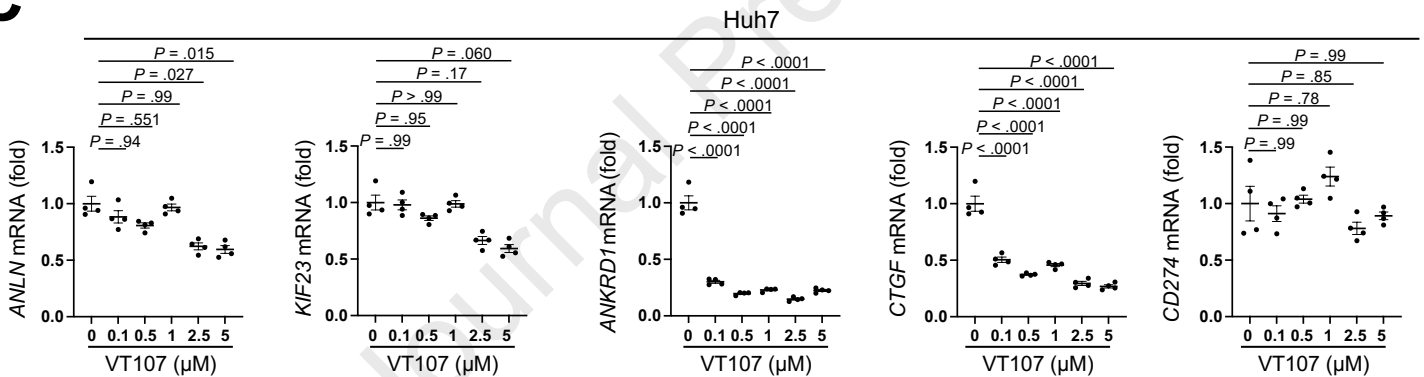

**Supplementary Figure 11. TEAD inhibition for HCC therapy.** **A.** Huh7 and PLC/PRF/5 cells were treated with a pan-TEAD inhibitor, VT104 or VT107, at indicated concentration for 24 hours followed by WST assay to assess EC50. **B.** Huh7 cells were treated with Pan-TEAD inhibitors, VT104 for 24 hours followed by qPCR of *CTGF* and *CD274*. **C.** Huh7 cells were treated with pan-TEAD inhibitors, VT107 for 24 hours followed by qPCR of *ANLN*, *KIF23*, *ANKRD1*, *CTGF* and *CD274*.



### 3. SUPPLEMENTARY MATERIAL AND METHODS

#### Mice

Mice were maintained on a 12-hour dark/12-hour light cycle with ad libitum access to food and water. C57BL/6J (#000664), SREBP2 floxed (#030826), tdTom floxed (#007914, Ai14 Cre reporter) mice were purchased from Jackson laboratory. Wwtr1 floxed and YAP floxed mice were provided by Dr. Eric Olson, University of Texas Southwestern. dCas9 (nuclease dead Cas9) transgenic mice are derived from Rosa26-LSL-dCas9<sup>1</sup> with removal of LSL cassette by crossing with CMV-Cre mice (Jackson laboratory, stock#006054). The LSL removal was confirmed by genotyping and staining of liver tissue for dCas9 (data not shown). *Mdr2*<sup>KO</sup> mice were kindly gifted from Dr. Detlef Schuppan (University of Mainz, Germany).

#### Induction of hepatocarcinogenesis

For the induction of NASH-associated HCC, C57BL/6J mice were fed with FPC diet (Envigo, TD.160785) in combination with high glucose (18.9 g/L) fructose (23.1 g/L) in drinking water for 13 months<sup>2</sup> or CDAA-HFD diet (Research Diet, A06071302) for 6-8 months to develop HCC. *Mdr2*<sup>KO</sup> mice spontaneously develop HCC at 12-15 months old<sup>3</sup>.

#### Conditional deletion and pharmacologic treatments in mice

For hepatocyte specific deletion of floxed genes,  $1.0 \times 10^{11}$  GC of AAV8-TBG-Cre or AAV8-TBG-Null per mouse via retro-orbital were injected intravenously one week before HTVI or CCl<sub>4</sub> treatment in DEN+CCl<sub>4</sub> induced HCC model. Some mice were given

simvastatin (50 mg/kg/day) and/or sorafenib (15 mg/kg) via oral gavage every two days<sup>4</sup>, others received pan-TEAD inhibitors VT104 (10 mg/kg) or VT107 (30 mg/kg) daily. For the combination therapy experiment of simvastatin and anti-PD-1, mice were given simvastatin (50 mg/kg) daily via oral gavage and/or intraperitoneally injected with anti-PD-1 (10mg/kg) at day 0, day 3 and every 5 days afterwards (8 times in total).

### Reagents and Plasmids

Simvastatin (Sigma, S3626), pitavastatin (Sigma, SML2473), YM-53601 (Cayman Chemical, 18113), FTI-277 (Sigma, F9803) and GGTI-298 (Sigma, G5169), were dissolved in DMSO. Zoledronic acid (R&D Systems, 6111) was dissolved in PBS. Mevalonolactone (mevalonic acid; Sigma, M4667) was dissolved in ethanol. Farnesyl pyrophosphate ammonium salt (FPP; Sigma F6892), squalene (Sigma, S3626) and geranylgeranyl pyrophosphate ammonium salt (GGPP; Sigma, G6025) were dissolved in DMSO right before each experiment. Diethylnitrosamine (DEN, Sigma, N0258) was dissolved in sterile water and carbon tetrachloride (CCl<sub>4</sub>, Sigma, 319961) in corn oil (Sigma). AAV.TBG.PI.Cre.rBG and AAV.TBG.PI.Null.bGH were from Addgene (viral prep # 107787-AAV8, # 105536-AAV8; [http://n2t.net/addgene: 107787](http://n2t.net/addgene:107787), <http://n2t.net/addgene:105536>; RRID: Addgene\_107787, 105536). siRNAs for *SREBF2* (s27, s28), *HMGCR* (s141, s142), *FDFT1* (s138, s139), *ANLN* (s28982, s28983) and *KIF23* (s18198, s18199) and the negative control were purchased from Thermo Fisher Scientific. pCMV-SB13 plasmid was kindly gifted from Lars Zender from University Hospital Tübingen. pT3-EF1a-TAZS89A<sup>5</sup>, pT3-EF1a-YAPS127A, pT3-EF1a-Tead2VP16 and pT3-EF1a-dnTead2<sup>6</sup> plasmids were kindly gifted by Dr. Xin Chen from University of

California San Francisco (UCSF), pT3-EF1a-cMet and pT3-EF5a-CTNNB1-S45Y-Myc-tag<sup>7</sup> by Dr. Paul Monga (University of Pittsburgh). EF1a-TAZS89A was cloned via XmaI and BsiWI restriction sites into pKT2-FAH-Myc/U6-sgRNA/PGK-SB11 to replace FAH-Myc and produce pKT2-EF1a-TAZS89A/U6-gRNA/PGK-SB11 plasmid. The pT3-EF1a-TAZ-S51A-S89A double mutant was generated using infusion cloning (Takara Bio). Anti-mouse PD-1 (Bio X Cell, BE0146) and IgG isotype control (Bio X Cell, BE0089) were diluted with dilution buffer (Bio X Cell, IP0070 and IP0065 respectively). Preparation of pan-TEAD inhibitors, VT104 and VT107, for mice was described previously<sup>8</sup>. For VT104 and VT107 for in vitro experiment, 10 mM stock solution was prepared and diluted accordingly.

### **CRISPR interference (CRISPRi) screening**

The gRNA library, containing gRNAs for 36 TAZ target genes, each covered by  $\geq 5$  different gRNAs, positive and negative controls and a few additional select genes of interest (**Suppl.Table.1**), was amplified with PCR using the primers CTCGGGATAGTTATACTC and GCCCAAATCTACTAAG. Purified PCR products of gRNA library were digested with BspQI and cloned into BspQI restriction site at the downstream of U6 promoter in pKT2-EF1a-TAZS89A/U6-gRNA/PGK-SB11 to obtain the TAZ-CRISPRi plasmid library. C57BL6J mice (n=4) and dead Cas9 (dCas9) transgenic mice (n=7) were subjected with HTVI of 40  $\mu$ g TAZ-CRISPRi plasmid library followed by CCl<sub>4</sub> injection three times per week for a total 14 injections. After harvesting livers, DNA was extracted from the whole liver tissue and high-throughput sequencing was performed as described previously<sup>1</sup> to determine the relative abundance of the gRNA as compared

to the input. The analysis of significantly enriched and depleted gRNAs by gene was performed using MAGeK package<sup>9</sup>.

### **Cell lines and treatments**

Human hepatocellular carcinoma cell lines, Huh7, PLC/PRF/5 and Hep3B were purchased from the American Type Culture Collection (ATCC). The cells were cultured in Dulbecco's modified Eagle's medium (DMEM; Thermo Fisher Scientific) with high glucose supplemented with 10% fetal bovine serum (FBS) at 37 degrees under 5% CO<sub>2</sub>. dCas9 expressing HCC line, T226, was derived from the HCC tissue isolated from a Rosa26-LSL-dCas9 mouse hydrodynamically injected with MYC- and TGF $\alpha$ -expressing *Sleeping Beauty* plasmids together with transposase plasmid. The LSL cassette was removed by applying AAV-Cre virus to the cell lines and by selecting clones. The removal of the stop cassette was confirmed by genotyping and expression analysis of the dCas9 enzyme (not shown) T226 cells were cultured with Advanced MEM (ThermoFisher scientific, 12492013) supplemented with 5% FBS and GlutaMAX Supplement (ThermoFisher scientific, 35050061) at 37 degrees under 5% CO<sub>2</sub>. Cell proliferation was assessed with water-soluble tetrazolium salt assay (WST-1 assay; Millipore Sigma). Preparation of liposomes was described previously<sup>2</sup>. Cells were seeded in 24 well plates and treated with 50  $\mu$ L of liposome solution or vehicle (PBS) with 450 $\mu$ L of DMEM with 10% FBS to deplete cholesterol. Some cells were treated with cholesterol-enriched liposome after cholesterol depletion. To inhibit the mevalonate pathway, cells were treated with simvastatin (10  $\mu$ M), pitavastatin (10  $\mu$ M), YM-53601 (10  $\mu$ M), FTI-277 (10  $\mu$ M) and GGTI-298 (10  $\mu$ M) or Zoledronic acid (200  $\mu$ M) for 48 hours otherwise indicated. For mevalonate



pathway substrate, mevalonolactone, Farnesyl pyrophosphate ammonium salt (FPP), squalene and geranylgeranyl pyrophosphate ammonium salt (GGPP) were used at 10  $\mu$ M. Primary hepatocyte isolation was described previously<sup>10</sup>. Isolated primary hepatocytes were seeded in William's Eagle medium (Gibco) containing 10% FBS, 100nM dexamethasone (Gibco) and Cell maintenance cocktail B (Gibco, #13448) on collagen-coated plates.

### **siRNA-mediated knockdown and plasmid transfection**

siRNAs for *SREBF2* (s27, s28), *HMGCR* (s141, s142), *FDFT1* (s138, s139), *ANLN* (s28982, s28983) and *KIF23* (s18198, s18199) and the negative control were purchased from Thermo Fisher Scientific. Cells were transfected with siRNAs using lipofectamine RNAiMAX (Thermo Fisher Scientific) according to manufacturer protocol. Cells were analyzed at 72 hours after transfection otherwise indicated. Cells were transfected with plasmids using lipofectamine 3000 (Thermo Fisher Scientific) according to manufacturer protocol. Cells were analyzed 48 hours after transfection.

### **Immunohistochemistry and immunofluorescence**

Liver tissues were fixed with 10% formalin or 4% paraformaldehyde to prepare paraffin embedded blocks or frozen blocks respectively. Liver sections with 5- $\mu$ m thickness were incubated with antibodies specific for the following proteins were used for primary antibody: AFP (Abcam, ab46799), CD3 (Leica, Clone LN10, for human), CD45 (Ventana, Clone 2B11 & PD7/26, for human), CD45 (BD, 550359, for mouse), *FDFT1* (Abcam, ab195046), GFP (Abcam, ab6673), Ki67 (Abcam ab16667), phospho-histone H2A.X

(CST, #9718), TAZ (Wwtr1; Sigma, HPA007415) and YAP (Santa Cruz, sc-101199). For reticulin staining, reticulum stain kit (Abcam, ab150864) was used according to manufacturer protocol. Sirius Red, CD3 and CD45 positive areas were analyzed using Aperio ImageScope (Leica).

### **Human Tissue Microarray (TMA)**

Among 66 cases of TMA, we excluded 4 cases, which are one case of HCC-CCC (cholangiocellular carcinoma) mixed tumor, fibrolamellar HCC, hepatoblastoma and duplicate of another case. Tumor and non-tumor area of 62 cases were analyzed using Aperio ImageScope (Leica). Average intensity (Iavg) of all DAB positive pixels was measured using the same algorithm in all samples. Inverse value of average intensity was defined as TAZ or YAP positivity. Of note, intensity in this software range from zero (black) to 255 (bright white) (cited from Aperio Positive Pixel Count Algorithm User's Guide), meaning DAB positivity is basically considered to have inverse correlation with intensity. We regarded TAZ or YAP as positive when TAZ or YAP positivity in tumor area was higher than in non-tumor area.

### **HCC patient survival analysis**

Prognostic association of the TEAD family and target genes' expression in **Fig.3C** and **Suppl.Fig.6** was assessed by using log-rank test and Cox regression in two cohorts of patients with histologically confirmed hepatocellular carcinoma: TCGA-LIHC (n=359, [portal.gdc.cancer.gov/projects/TCGA-LIHC](http://portal.gdc.cancer.gov/projects/TCGA-LIHC)) and ICGC-LIRI-JP (n=232, [dcc.icgc.org/projects/LIRI-JP](http://dcc.icgc.org/projects/LIRI-JP)). High expression of each gene was defined by upper

quartile of normalized expression as the cut-off value. The analysis was performed by using R statistical language ([www.r-project.org](http://www.r-project.org)). Kaplan-Meier survival analysis of The Cancer Genome Atlas (TCGA)-Liver Hepatocellular Carcinoma (LIHC) data stratified by viral or non-viral etiology in ANLN and KIF23 expression was performed via <https://kmplot.com/analysis/><sup>11</sup> for **Suppl.Fig.5E**.

### **Western blot analysis**

Cells or liver tissues were homogenized in RIPA buffer (TAKNOVA, R3792) with proteinase inhibitor (Roche) and phosphatase inhibitor (Roche). The supernatant was collected after centrifugation. Protein concentration was determined using a bicinchoninic acid protein assay kit (BCA assay kit, ThermoFisher Scientific). Equal amounts of the protein from the supernatant were separated in 8 – 12% sodium dodecyl sulfate (SDS) polyacrylamide gels and transferred onto nitrocellulose membrane (GE Healthcare, 1060006). Antibodies specific for the following proteins were used for immunodetection: Anilin (Novus Biological, NBP1-31060), GAPDH (Sigma, G9295), HMGCR (Novus Biological, NBP2-66888), MKLP(Kif23) (Abcam, ab714304), Anti-myc tag (Maine Medical Center, #Vli01), SREBP-2 (Millipore, MABS1988), TAZ (Wwtr1; Sigma, HPA007415, ABclonal, A8202), YAP/TAZ (Cell Signaling Technology, #8418), YAP (Abcam, ab205270). Quantification of expression levels was measured by ImageJ.

### **Quantitative real-time RT-PCR**

Total RNA extracted from cells and livers with RNA extraction kit (QIAGEN or Roche) was reverse-transcribed using High-Capacity cDNA Reverse Transcription Kit (Applied

Biosystems). Real-time reverse transcription polymerase chain reaction was conducted using TaqMan Gene Expression Assays with QuantStudio 3 (Applied Biosystems, Thermo Fisher Scientific). The following primer probes were used: *Afp* (Mm00431715\_m1), *Ccl2* (Mm00441242\_m1), *Cd3e* (Mm00599683\_m1), *Cd4* (Mm00442754\_m1), *Cd8a* (Mm01182108\_m1), *Gpc3* (Mm00516722\_m1), *Tnfa* (Mm00443258\_m1) and *18s* (Hs99999901\_S1). Gene expression was normalized to *18s*.

### **Chromatin immunoprecipitation (ChIP) assay**

ChIP was performed using SimpleChIP plus Enzymatic Chromatin IP Kit (Cell Signaling Technology #38191) according to the manufacturer protocol. Briefly, frozen mouse HCC tissues induced by HTVI of pT3-EF1a-FLAG-TAZ *Sleeping Beauty* plasmid together with SB13 were minced with a clean razor blade and cross-linked with 1.5% formaldehyde. Cross-linked tissue was homogenized with a Dounce homogenizer followed by centrifugation at 2000 x g to pellet nuclei. Nuclei pellet was treated with nuclease to digest DNA to length of 150-900 bp confirmed by electrophoresis. Immunoprecipitation was performed using mouse FLAG antibody (1:50; Sigma F1804) and normal IgG as a negative control. The primer set of CCAGCTTCATACATGGGAGCTAT and TGCCTCTGTTAATCCTTGGTTTC, and TGGAGAAAACCTGAGAGGGG and AAGATGATGTGGTAGCCAGCG were used for qPCR of Anln and Kif23 promoter regions, including the TEAD binding site.



## REFERENCES (for Supplementary Material and Methods)

1. Wangenstein KJ, Wang YJ, Dou Z, et al. Combinatorial genetics in liver repopulation and carcinogenesis with a *in vivo* CRISPR activation platform. *Hepatology* 2018;68:663-676.
2. Wang X, Cai B, Yang X, et al. Cholesterol Stabilizes TAZ in Hepatocytes to Promote Experimental Non-alcoholic Steatohepatitis. *Cell Metab* 2020;31:969-986 e7.
3. Mauad TH, van Nieuwkerk CM, Dingemans KP, et al. Mice with homozygous disruption of the *mdr2* P-glycoprotein gene. A novel animal model for studies of nonsuppurative inflammatory cholangitis and hepatocarcinogenesis. *Am J Pathol* 1994;145:1237-45.
4. Jian C, Fu J, Cheng X, et al. Low-Dose Sorafenib Acts as a Mitochondrial Uncoupler and Ameliorates Nonalcoholic Steatohepatitis. *Cell Metab* 2020;31:892-908 e11.
5. Wang H, Zhang S, Zhang Y, et al. TAZ is indispensable for c-MYC-induced hepatocarcinogenesis. *J Hepatol* 2022;76:123-134.
6. Zhang J, Liu P, Tao J, et al. TEA Domain Transcription Factor 4 Is the Major Mediator of Yes-Associated Protein Oncogenic Activity in Mouse and Human Hepatoblastoma. *Am J Pathol* 2019;189:1077-1090.
7. Tao J, Xu E, Zhao Y, et al. Modeling a human hepatocellular carcinoma subset in mice through coexpression of *met* and point-mutant beta-catenin. *Hepatology* 2016;64:1587-1605.
8. Tang TT, Konradi AW, Feng Y, et al. Small Molecule Inhibitors of TEAD Auto-palmitoylation Selectively Inhibit Proliferation and Tumor Growth of NF2-deficient Mesothelioma. *Mol Cancer Ther* 2021;20:986-998.
9. Li W, Xu H, Xiao T, et al. MAGeCK enables robust identification of essential genes from genome-scale CRISPR/Cas9 knockout screens. *Genome Biol* 2014;15:554.
10. Saito Y, Hikita H, Nozaki Y, et al. DNase II activated by the mitochondrial apoptotic pathway regulates RIP1-dependent non-apoptotic hepatocyte death via the TLR9/IFN-beta signaling pathway. *Cell Death Differ* 2019;26:470-486.
11. Menyhart O, Nagy A, Gyorffy B. Determining consistent prognostic biomarkers of overall survival and vascular invasion in hepatocellular carcinoma. *R Soc Open Sci* 2018;5:181006.

Author names in bold designate shared co-first authorship" at the end of the references section.

Supplementary Table 1. gRNA sequences

| <u>gRNA</u>         | <u>gene</u>      | <u>spacer sequence</u> | <u>oligo sequence</u>                                                                   |
|---------------------|------------------|------------------------|-----------------------------------------------------------------------------------------|
| non-targeting_02070 | negative_control | GTTCGCCCGGCAACAGCA     | CTCGGGATAGTTATACTCcaacGCTCTTgaccGTTGCCCGGCAACAGCAAGGtttGAAGAGCgctgCTTAGTGTAGATTTGGGC    |
| non-targeting_02071 | negative_control | GGGCATGAATGATGATATGAG  | CTCGGGATAGTTATACTCcaacGCTCTTgaccGGCATGAATGATGATAGtttGAAGAGCgctgCTTAGTGTAGATTTGGGC       |
| non-targeting_02072 | negative_control | GGGCTCAGACTGCTAAATC    | CTCGGGATAGTTATACTCcaacGCTCTTgaccGGGCTCAGACTGCTAAATGtttGAAGAGCgctgCTTAGTGTAGATTTGGGC     |
| non-targeting_02073 | negative_control | GGTTAAAGAGTCTAGGGGGA   | CTCGGGATAGTTATACTCcaacGCTCTTgaccGGTTAAAGAGTCTAGGGGAgtttGAAGAGCgctgCTTAGTGTAGATTTGGGC    |
| non-targeting_02074 | negative_control | GTTCAGAGTCTGTACGAGA    | CTCGGGATAGTTATACTCcaacGCTCTTgaccGGTCAAGAGTCTGTACGAGtttGAAGAGCgctgCTTAGTGTAGATTTGGGC     |
| non-targeting_02075 | negative_control | GAATCCGCTGTAGAGTGA     | CTCGGGATAGTTATACTCcaacGCTCTTgaccGAATCCGCTGTAGAGTAgtttGAAGAGCgctgCTTAGTGTAGATTTGGGC      |
| non-targeting_02076 | negative_control | GCGGCTGTGCAATAGCA      | CTCGGGATAGTTATACTCcaacGCTCTTgaccGGCTGTGCAATAgtttGAAGAGCgctgCTTAGTGTAGATTTGGGC           |
| non-targeting_02077 | negative_control | GTGCGGAAGCTTCAACTA     | CTCGGGATAGTTATACTCcaacGCTCTTgaccGTGCGGAAGCTTCAACTAgtttGAAGAGCgctgCTTAGTGTAGATTTGGGC     |
| non-targeting_02078 | negative_control | GTAGGTTTAAAGACTCACAT   | CTCGGGATAGTTATACTCcaacGCTCTTgaccGTAGGTTTAAAGACTCACATgtttGAAGAGCgctgCTTAGTGTAGATTTGGGC   |
| non-targeting_02079 | negative_control | GGATGATACAGTGGCGGAG    | CTCGGGATAGTTATACTCcaacGCTCTTgaccGATGATACAGTGGCGGAgtttGAAGAGCgctgCTTAGTGTAGATTTGGGC      |
| non-targeting_02080 | negative_control | GGGAACCGGCGGATTTGT     | CTCGGGATAGTTATACTCcaacGCTCTTgaccGGGAACCGGCGGATTTGtttGAAGAGCgctgCTTAGTGTAGATTTGGGC       |
| non-targeting_02081 | negative_control | GAGGACTTGGCGGCTCCCG    | CTCGGGATAGTTATACTCcaacGCTCTTgaccGAGGACTTGGCGGCTCCCGgtttGAAGAGCgctgCTTAGTGTAGATTTGGGC    |
| non-targeting_02082 | negative_control | GGCAAGCGGAGAGCCGGG     | CTCGGGATAGTTATACTCcaacGCTCTTgaccGGCAAGCGGAGAGCCGGGtttGAAGAGCgctgCTTAGTGTAGATTTGGGC      |
| non-targeting_02083 | negative_control | GCTTGTGAGCGAGAATCGT    | CTCGGGATAGTTATACTCcaacGCTCTTgaccGCTTGTGAGCGAGAATCGTgtttGAAGAGCgctgCTTAGTGTAGATTTGGGC    |
| non-targeting_02084 | negative_control | GCATCGCTCAAAAAGATG     | CTCGGGATAGTTATACTCcaacGCTCTTgaccGCATCGCTCAAAAAGATGtttGAAGAGCgctgCTTAGTGTAGATTTGGGC      |
| non-targeting_02085 | negative_control | GCACATTCGGTCGAACTCG    | CTCGGGATAGTTATACTCcaacGCTCTTgaccGCACATTCGGTCGAACTCGtttGAAGAGCgctgCTTAGTGTAGATTTGGGC     |
| non-targeting_02086 | negative_control | CCGGATGTGTATGACTGCT    | CTCGGGATAGTTATACTCcaacGCTCTTgaccCCGGATGTGTATGACTGCTgtttGAAGAGCgctgCTTAGTGTAGATTTGGGC    |
| non-targeting_02087 | negative_control | GACATTTCTATCGACAAGG    | CTCGGGATAGTTATACTCcaacGCTCTTgaccGACATTTCTATCGACAAGGtttGAAGAGCgctgCTTAGTGTAGATTTGGGC     |
| non-targeting_02088 | negative_control | GTGGTGGCTTCCGACAGTA    | CTCGGGATAGTTATACTCcaacGCTCTTgaccGTGGTGGCTTCCGACAGTAgtttGAAGAGCgctgCTTAGTGTAGATTTGGGC    |
| non-targeting_02089 | negative_control | GGGCACTTTGGAGCCGCA     | CTCGGGATAGTTATACTCcaacGCTCTTgaccGGGCACTTTGGAGCCGCAgtttGAAGAGCgctgCTTAGTGTAGATTTGGGC     |
| non-targeting_02090 | negative_control | GAGCTGCCTCAAGGTGGCG    | CTCGGGATAGTTATACTCcaacGCTCTTgaccGAGCTGCCTCAAGGTGGCGgtttGAAGAGCgctgCTTAGTGTAGATTTGGGC    |
| non-targeting_02091 | negative_control | GAAAGCGCACAAGGAGCGGA   | CTCGGGATAGTTATACTCcaacGCTCTTgaccGAAAGCGCACAAGGAGCGGAgtttGAAGAGCgctgCTTAGTGTAGATTTGGGC   |
| non-targeting_02092 | negative_control | GTGTAGGACGAGAGCGACG    | CTCGGGATAGTTATACTCcaacGCTCTTgaccGTGTAGGACGAGAGCGACGtttGAAGAGCgctgCTTAGTGTAGATTTGGGC     |
| non-targeting_02093 | negative_control | GATGCGCCCGCGAAGCGCA    | CTCGGGATAGTTATACTCcaacGCTCTTgaccGATGCGCCCGCGAAGCGCAgtttGAAGAGCgctgCTTAGTGTAGATTTGGGC    |
| non-targeting_02094 | negative_control | TTCCCGAGGTGCGAAGCTCG   | CTCGGGATAGTTATACTCcaacGCTCTTgaccTTCCCGAGGTGCGAAGCTCGtttGAAGAGCgctgCTTAGTGTAGATTTGGGC    |
| non-targeting_02095 | negative_control | CCGCCGGGCTGTCAACTCG    | CTCGGGATAGTTATACTCcaacGCTCTTgaccCCGCCGGGCTGTCAACTCGtttGAAGAGCgctgCTTAGTGTAGATTTGGGC     |
| non-targeting_02096 | negative_control | GGTGTGGCTGTGCTGCTTCC   | CTCGGGATAGTTATACTCcaacGCTCTTgaccGGTGTGGCTGTGCTGCTTCCgtttGAAGAGCgctgCTTAGTGTAGATTTGGGC   |
| non-targeting_02097 | negative_control | GGCAAGCTAAGAACAGCGGA   | CTCGGGATAGTTATACTCcaacGCTCTTgaccGCAAGCTAAGAACAGCGGAgtttGAAGAGCgctgCTTAGTGTAGATTTGGGC    |
| non-targeting_02098 | negative_control | GAGGAGGCGCGCACGCCACA   | CTCGGGATAGTTATACTCcaacGCTCTTgaccGAGGAGGCGCGCACGCCCAgtttGAAGAGCgctgCTTAGTGTAGATTTGGGC    |
| non-targeting_02099 | negative_control | GGTGTGAGGAGCTCCAGCAG   | CTCGGGATAGTTATACTCcaacGCTCTTgaccGGTGTGAGGAGCTCCAGCAGtttGAAGAGCgctgCTTAGTGTAGATTTGGGC    |
| non-targeting_02100 | negative_control | GTCAGTGTACCTCCGCTCT    | CTCGGGATAGTTATACTCcaacGCTCTTgaccGTCAGTGTACCTCCGCTCTgtttGAAGAGCgctgCTTAGTGTAGATTTGGGC    |
| non-targeting_02101 | negative_control | CGTACTTCTCCCGGGGG      | CTCGGGATAGTTATACTCcaacGCTCTTgaccCGTACTTCTCCCGGGGGgtttGAAGAGCgctgCTTAGTGTAGATTTGGGC      |
| non-targeting_02102 | negative_control | CGAAGAAGTGTGTCCAAAG    | CTCGGGATAGTTATACTCcaacGCTCTTgaccCGAAGAAGTGTGTCCAAAGgtttGAAGAGCgctgCTTAGTGTAGATTTGGGC    |
| non-targeting_02103 | negative_control | GATTAATGTTGTGCGTAGA    | CTCGGGATAGTTATACTCcaacGCTCTTgaccGATTAATGTTGTGCGTAGAgtttGAAGAGCgctgCTTAGTGTAGATTTGGGC    |
| non-targeting_02104 | negative_control | GCATTCGCAACCCCTCAGAT   | CTCGGGATAGTTATACTCcaacGCTCTTgaccGCATTCGCAACCCCTCAGATgtttGAAGAGCgctgCTTAGTGTAGATTTGGGC   |
| non-targeting_02105 | negative_control | CGCCGCGGGGGCCATACCG    | CTCGGGATAGTTATACTCcaacGCTCTTgaccCGCCGCGGGGGCCATACCGgtttGAAGAGCgctgCTTAGTGTAGATTTGGGC    |
| non-targeting_02106 | negative_control | GTACTCCTGAAGTCCAGAT    | CTCGGGATAGTTATACTCcaacGCTCTTgaccGTACTCCTGAAGTCCAGATgtttGAAGAGCgctgCTTAGTGTAGATTTGGGC    |
| non-targeting_02107 | negative_control | GGCGTGTGAAGACGCACTA    | CTCGGGATAGTTATACTCcaacGCTCTTgaccGGCGTGTGAAGACGCACTAgtttGAAGAGCgctgCTTAGTGTAGATTTGGGC    |
| non-targeting_02108 | negative_control | CCGGTGTCCGCTATTGCGA    | CTCGGGATAGTTATACTCcaacGCTCTTgaccCCGGTGTCCGCTATTGCGAgtttGAAGAGCgctgCTTAGTGTAGATTTGGGC    |
| non-targeting_02109 | negative_control | CGCGGCCCTGAGATGGTGC    | CTCGGGATAGTTATACTCcaacGCTCTTgaccCGCGGCCCTGAGATGGTGCgtttGAAGAGCgctgCTTAGTGTAGATTTGGGC    |
| non-targeting_02110 | negative_control | GAGAACGGGAATCGCGCC     | CTCGGGATAGTTATACTCcaacGCTCTTgaccGAGAACGGGAATCGCGCCgtttGAAGAGCgctgCTTAGTGTAGATTTGGGC     |
| non-targeting_02111 | negative_control | GGACACATAAGATCATGTAT   | CTCGGGATAGTTATACTCcaacGCTCTTgaccGGACACATAAGATCATGTATgtttGAAGAGCgctgCTTAGTGTAGATTTGGGC   |
| non-targeting_02112 | negative_control | GTGGTCTACTGATTTAGCTG   | CTCGGGATAGTTATACTCcaacGCTCTTgaccGTGGTCTACTGATTTAGCTGgtttGAAGAGCgctgCTTAGTGTAGATTTGGGC   |
| non-targeting_02113 | negative_control | GTGCAGGGCAACCACTGAG    | CTCGGGATAGTTATACTCcaacGCTCTTgaccGTGCAGGGCAACCACTGAGgtttGAAGAGCgctgCTTAGTGTAGATTTGGGC    |
| non-targeting_02114 | negative_control | GATCGCGCCGGGGGAGCA     | CTCGGGATAGTTATACTCcaacGCTCTTgaccGATCGCGCCGGGGGAGCAgtttGAAGAGCgctgCTTAGTGTAGATTTGGGC     |
| non-targeting_02115 | negative_control | TTCCGCGCACTGTGTGCTCA   | CTCGGGATAGTTATACTCcaacGCTCTTgaccTTCCGCGCACTGTGTGCTCAgtttGAAGAGCgctgCTTAGTGTAGATTTGGGC   |
| non-targeting_02116 | negative_control | GCCTCAAGCATCTAAGTTTG   | CTCGGGATAGTTATACTCcaacGCTCTTgaccGCCTCAAGCATCTAAGTTTgtttGAAGAGCgctgCTTAGTGTAGATTTGGGC    |
| non-targeting_02117 | negative_control | GAACCGGTTCTGTGAGGAAGT  | CTCGGGATAGTTATACTCcaacGCTCTTgaccGAACCGGTTCTGTGAGGAAGTgtttGAAGAGCgctgCTTAGTGTAGATTTGGGC  |
| non-targeting_02118 | negative_control | CCGGCAGCATCTGAGAAAG    | CTCGGGATAGTTATACTCcaacGCTCTTgaccCCGGCAGCATCTGAGAAAGgtttGAAGAGCgctgCTTAGTGTAGATTTGGGC    |
| non-targeting_02119 | negative_control | GGGAGGGAAGCTCCCGGTA    | CTCGGGATAGTTATACTCcaacGCTCTTgaccGGGAGGGAAGCTCCCGGTAgtttGAAGAGCgctgCTTAGTGTAGATTTGGGC    |
| non-targeting_02120 | negative_control | GCTTGTCTCTTTCGCTG      | CTCGGGATAGTTATACTCcaacGCTCTTgaccGCTTGTCTCTTTCGCTGgtttGAAGAGCgctgCTTAGTGTAGATTTGGGC      |
| non-targeting_02121 | negative_control | GGTAGAGTAAACATCGCAGT   | CTCGGGATAGTTATACTCcaacGCTCTTgaccGGTAGAGTAAACATCGCAGTgtttGAAGAGCgctgCTTAGTGTAGATTTGGGC   |
| non-targeting_02122 | negative_control | GCTCTTCCCTGACCCGG      | CTCGGGATAGTTATACTCcaacGCTCTTgaccGCTCTTCCCTGACCCGGgtttGAAGAGCgctgCTTAGTGTAGATTTGGGC      |
| non-targeting_02123 | negative_control | CGCGGATGGTTCGGCTAGT    | CTCGGGATAGTTATACTCcaacGCTCTTgaccCGCGGATGGTTCGGCTAGTgtttGAAGAGCgctgCTTAGTGTAGATTTGGGC    |
| non-targeting_02124 | negative_control | GGCTACAGCTGGAGTGCCT    | CTCGGGATAGTTATACTCcaacGCTCTTgaccGGCTACAGCTGGAGTGCCTgtttGAAGAGCgctgCTTAGTGTAGATTTGGGC    |
| non-targeting_02125 | negative_control | GGACAACGGTGGGAAAGCT    | CTCGGGATAGTTATACTCcaacGCTCTTgaccGGACAACGGTGGGAAAGCTgtttGAAGAGCgctgCTTAGTGTAGATTTGGGC    |
| non-targeting_02126 | negative_control | GTATAGCGCGCTGGCAAGTG   | CTCGGGATAGTTATACTCcaacGCTCTTgaccGTATAGCGCGCTGGCAAGTGgtttGAAGAGCgctgCTTAGTGTAGATTTGGGC   |
| non-targeting_02127 | negative_control | GGCTCAGACTCCACCTGGA    | CTCGGGATAGTTATACTCcaacGCTCTTgaccGGCTCAGACTCCACCTGGAgtttGAAGAGCgctgCTTAGTGTAGATTTGGGC    |
| non-targeting_02128 | negative_control | GGGCAGGCTGAACGAGGATA   | CTCGGGATAGTTATACTCcaacGCTCTTgaccGGGCAGGCTGAACGAGGATAgtttGAAGAGCgctgCTTAGTGTAGATTTGGGC   |
| non-targeting_02129 | negative_control | GCTAAGTGAAGGTTGGCGT    | CTCGGGATAGTTATACTCcaacGCTCTTgaccGCTAAGTGAAGGTTGGCGTgtttGAAGAGCgctgCTTAGTGTAGATTTGGGC    |
| non-targeting_02130 | negative_control | GGTGGGACAGGGGGGCAAC    | CTCGGGATAGTTATACTCcaacGCTCTTgaccGGTGGGACAGGGGGGCAACgtttGAAGAGCgctgCTTAGTGTAGATTTGGGC    |
| non-targeting_02131 | negative_control | GATCGACAGGCCATCACGG    | CTCGGGATAGTTATACTCcaacGCTCTTgaccGATCGACAGGCCATCACGGgtttGAAGAGCgctgCTTAGTGTAGATTTGGGC    |
| non-targeting_02132 | negative_control | GGCGAAGGCGCAAGTGGGG    | CTCGGGATAGTTATACTCcaacGCTCTTgaccGGCGAAGGCGCAAGTGGGGgtttGAAGAGCgctgCTTAGTGTAGATTTGGGC    |
| non-targeting_02133 | negative_control | GGACACAGCAACCACTCC     | CTCGGGATAGTTATACTCcaacGCTCTTgaccGGACACAGCAACCACTCCgtttGAAGAGCgctgCTTAGTGTAGATTTGGGC     |
| non-targeting_02134 | negative_control | GTTCGAGGGCTCACTCGA     | CTCGGGATAGTTATACTCcaacGCTCTTgaccGTTCGAGGGCTCACTCGAgtttGAAGAGCgctgCTTAGTGTAGATTTGGGC     |
| non-targeting_02135 | negative_control | GAAGAGCACTATGCGGTTTA   | CTCGGGATAGTTATACTCcaacGCTCTTgaccGAAGAGCACTATGCGGTTTAgtttGAAGAGCgctgCTTAGTGTAGATTTGGGC   |
| non-targeting_02136 | negative_control | TTTGGCAGGCGCGGCAAGTG   | CTCGGGATAGTTATACTCcaacGCTCTTgaccTTTGGCAGGCGCGGCAAGTGgtttGAAGAGCgctgCTTAGTGTAGATTTGGGC   |
| non-targeting_02137 | negative_control | GGCCCCCTGACGTTGCGTT    | CTCGGGATAGTTATACTCcaacGCTCTTgaccGGCCCCCTGACGTTGCGTTgtttGAAGAGCgctgCTTAGTGTAGATTTGGGC    |
| non-targeting_02138 | negative_control | GGTAGCGCGCTTAGGACTC    | CTCGGGATAGTTATACTCcaacGCTCTTgaccGGTAGCGCGCTTAGGACTCgtttGAAGAGCgctgCTTAGTGTAGATTTGGGC    |
| non-targeting_02139 | negative_control | GTCTACTCGCGCAAGCAAGT   | CTCGGGATAGTTATACTCcaacGCTCTTgaccGTCTACTCGCGCAAGCAAGTgtttGAAGAGCgctgCTTAGTGTAGATTTGGGC   |
| non-targeting_02140 | negative_control | CGCGCTCTGAGAATCTCGT    | CTCGGGATAGTTATACTCcaacGCTCTTgaccCGCGCTCTGAGAATCTCGTgtttGAAGAGCgctgCTTAGTGTAGATTTGGGC    |
| non-targeting_02141 | negative_control | GCTCTGTCCCTATACGAGT    | CTCGGGATAGTTATACTCcaacGCTCTTgaccGCTCTGTCCCTATACGAGTgtttGAAGAGCgctgCTTAGTGTAGATTTGGGC    |
| non-targeting_02142 | negative_control | GGCTTTGCGCAACCGCATG    | CTCGGGATAGTTATACTCcaacGCTCTTgaccGGCTTTGCGCAACCGCATGtttGAAGAGCgctgCTTAGTGTAGATTTGGGC     |
| non-targeting_02143 | negative_control | GACATCCGTTGTATTACA     | CTCGGGATAGTTATACTCcaacGCTCTTgaccGACATCCGTTGTATTACAgtttGAAGAGCgctgCTTAGTGTAGATTTGGGC     |
| non-targeting_02144 | negative_control | GGTACGGGGCTGTGAGGTGT   | CTCGGGATAGTTATACTCcaacGCTCTTgaccGGTACGGGGCTGTGAGGTGTgtttGAAGAGCgctgCTTAGTGTAGATTTGGGC   |
| non-targeting_02145 | negative_control | TTAGCCCGAGGACGCTCAAG   | CTCGGGATAGTTATACTCcaacGCTCTTgaccTTAGCCCGAGGACGCTCAAGgtttGAAGAGCgctgCTTAGTGTAGATTTGGGC   |
| non-targeting_02146 | negative_control | GTTAGCATCTCGGCCATAA    | CTCGGGATAGTTATACTCcaacGCTCTTgaccGTTAGCATCTCGGCCATAAgttttGAAGAGCgctgCTTAGTGTAGATTTGGGC   |
| non-targeting_02147 | negative_control | GGCAAGGTGGGATGACAGCG   | CTCGGGATAGTTATACTCcaacGCTCTTgaccGGCAAGGTGGGATGACAGCGgtttGAAGAGCgctgCTTAGTGTAGATTTGGGC   |
| non-targeting_02148 | negative_control | GACAGCTGGGGCTCATCAC    | CTCGGGATAGTTATACTCcaacGCTCTTgaccGACAGCTGGGGCTCATCACgtttGAAGAGCgctgCTTAGTGTAGATTTGGGC    |
| non-targeting_02149 | negative_control | GGGGTCTCTCGAAGCTGAG    | CTCGGGATAGTTATACTCcaacGCTCTTgaccGGGGTCTCTCGAAGCTGAGgtttGAAGAGCgctgCTTAGTGTAGATTTGGGC    |
| non-targeting_02150 | negative_control | GGAGCGCTACAGTCCCTAG    | CTCGGGATAGTTATACTCcaacGCTCTTgaccGGAGCGCTACAGTCCCTAGgtttGAAGAGCgctgCTTAGTGTAGATTTGGGC    |
| non-targeting_02151 | negative_control | CGCTCGCGGCGCGCTCGG     | CTCGGGATAGTTATACTCcaacGCTCTTgaccCGCTCGCGGCGCGCTCGGgtttGAAGAGCgctgCTTAGTGTAGATTTGGGC     |
| non-targeting_02152 | negative_control | GGTCCCGCGCGTGGCTTCT    | CTCGGGATAGTTATACTCcaacGCTCTTgaccGGTCCCGCGCGTGGCTTCTgtttGAAGAGCgctgCTTAGTGTAGATTTGGGC    |
| non-targeting_02153 | negative_control | GACAGGAGGAGCTCCCCGGA   | CTCGGGATAGTTATACTCcaacGCTCTTgaccGACAGGAGGAGGAGCTCCCCGAgtttGAAGAGCgctgCTTAGTGTAGATTTGGGC |
| non-targeting_02154 | negative_control | GTGCTGCGCGCGCTGTT      | CTCGGGATAGTTATACTCcaacGCTCTTgaccGTGCTGCGCGCGCTGTTgtttGAAGAGCgctgCTTAGTGTAGATTTGGGC      |
| non-targeting_02155 | negative_control | GGCGAGGGGGTGGCGGAAG    | CTCGGGATAGTTATACTCcaacGCTCTTgaccGGCGAGGGGGTGGCGGAAGgtttGAAGAGCgctgCTTAGTGTAGATTTGGGC    |
| non-targeting_02156 | negative_control | GACCACTAAATACAGAGGG    | CTCGGGATAGTTATACTCcaacGCTCTTgaccGACCACTAAATACAGAGGGgtttGAAGAGCgctgCTTAGTGTAGATTTGGGC    |
| non-targeting_02157 | negative_control | GGCATAAAGACAGTITCCCG   | CTCGGGATAGTTATACTCcaacGCTCTTgaccGGCATAAAGACAGTITCCCGgtttGAAGAGCgctgCTTAGTGTAGATTTGGGC   |
| non-targeting_02158 | negative_control | CGAGTGGCGGATACATCA     | CTCGGGATAGTTATACTCcaacGCTCTTgaccCGAGTGGCGGATACATCAgtttGAAGAGCgctgCTTAGTGTAGATTTGGGC     |
| non-targeting_02159 | negative_control | GACCGGCCAAAAGAAATAAA   | CTCGGGATAGTTATACTCcaacGCTCTTgaccGACCGGCCAAAAGAAATAAAgttttGAAGAGCgctgCTTAGTGTAGATTTGGGC  |
| non-targeting_02160 | negative_control | GACTGCGCGGGACTGGGT     | CTCGGGATAGTTATACTCcaacGCTCTTgaccGACTGCGCGGGACTGGGTgtttGAAGAGCgctgCTTAGTGTAGATTTGGGC     |
| non-targeting_02161 | negative_control | GAGAAAGCACGAGCCGATA    | CTCGGGATAGTTATACTCcaacGCTCTTgaccGAGAAAGCACGAGCCGATAgtttGAAGAGCgctgCTTAGTGTAGATTTGGGC    |
| non-targeting_02162 | negative_control | GGCGAAATGGCGGCTCCCT    | CTCGGGATAGTTATACTCcaacGCTCTTgaccGGCGAAATGGCGGCTCCCTgtttGAAGAGCgctgCTTAGTGTAGATTTGGGC    |
| non-targeting_02163 | negative_control | GGTAGAAATCGAGAGCGGG    | CTCGGGATAGTTATACTCcaacGCTCTTgaccGGTAGAAATCGAGAGCGGGgtttGAAGAGCgctgCTTAGTGTAGATTTGGGC    |
| non-targeting_02164 | negative_control | GCTTCAAAACCAACATGAA    | CTCGGGATAGTTATACTCcaacGCTCTTgaccGCTTCAAAACCAACATGAAgtttGAAGAGCgctgCTTAGTGTAGATTTGGGC    |
| non-targeting_02165 | negative_control | GATTCTTCTCGCTGGCGG     | CTCGGGATAGTTATACTCcaacGCTCTTgaccGATTCTTCTCGCTGGCGGgtttGAAGAGCgctgCTTAGTGTAGATTTGGGC     |
| non-targeting_02166 | negative_control | TACGCTACCATGCTTAGTGA   | CTCGGGATAGTTATACTCcaacGCTCTTgaccGTACGCTACCATGCTTAGTGAgttttGAAGAGCgctgCTTAGTGTAGATTTGGGC |
| non-targeting_02167 | negative_control | GGCGGCTCAACTTACGAA     | CTCGGGATAGTTATACTCcaacGCTCTTgaccGGCGGCTCAACTTACGAAgtttGAAGAGCgctgCTTAGTGTAGATTTGGGC     |
| non-targeting_02168 | negative_control | GAAGGAGGCGAGCAACGCT    | CTCGGGATAGTTATACTCcaacGCTCTTgaccGAAAGGAGGCGAGCAACGCTgtttGAAGAGCgctgCTTAGTGTAGATTTGGGC   |
| non-targeting_02169 | negative_control | GGAAAGAGGGCTACTCTGT    | CTCGGGATAGTTATACTCcaacGCTCTTgaccGGAAAGAGGGCTACTCTGTgtttGAAGAGCgctgCTTAGTGTAGATTTGGGC    |







Tead4\_-128300446.23-P1P2  
Tead4\_-128300466.23-P1P2  
Tead4\_-128300472.23-P1P2  
Tead4\_+128300288.23-P1P2  
Vash2\_1  
Vash2\_2  
Vash2\_3  
Vash2\_4  
Vash2\_5

Tead4  
Tead4  
Tead4  
Tead4  
Vash2  
Vash2  
Vash2  
Vash2  
Vash2

GCCGGGACTGGAGTTTGCA  
GGGAGCCCGCAGGAATGCA  
GCGGAGGAAATGACGGAAT  
GCCGAACCTGGGACCGTA  
AACAGCCTCTGCAGCAATG  
CAATGAGGCCGCCGAGGT  
GCAGCAATGAGCCGCCCCG  
ATTGCTGCAGAAGGCTGTTG  
GCAATGAGGCCGCCGAGG

CTCGGATAGTTACTCcaCGCTCTTgaccGCCGGACTGGAGTTGCAgtttGAAGAGCgctgCTTAGTGTAGATTGGGC  
CTCGGATAGTTACTCcaCGCTCTTgaccGGAGCCCGCAGGAATGCAgtttGAAGAGCgctgCTTAGTGTAGATTGGGC  
CTCGGATAGTTACTCcaCGCTCTTgaccGCGCAGGAATGCACGGAATgtttGAAGAGCgctgCTTAGTGTAGATTGGGC  
CTCGGATAGTTACTCcaCGCTCTTgaccGCCAACCTGGGACCGTAGtttGAAGAGCgctgCTTAGTGTAGATTGGGC  
CTCGGATAGTTACTCcaCGCTCTTgaccAACAGCCTCTGCAGCAATGgtttGAAGAGCgctgCTTAGTGTAGATTGGGC  
CTCGGATAGTTACTCcaCGCTCTTgaccCAATGAGGCCGCCGAGGtttGAAGAGCgctgCTTAGTGTAGATTGGGC  
CTCGGATAGTTACTCcaCGCTCTTgaccGAGCAATGAGGCCGCCGgtttGAAGAGCgctgCTTAGTGTAGATTGGGC  
CTCGGATAGTTACTCcaCGCTCTTgaccATTGCTGCAGAAGGCTGTTgtttGAAGAGCgctgCTTAGTGTAGATTGGGC  
CTCGGATAGTTACTCcaCGCTCTTgaccGCAATGAGGCCGCCGAGgtttGAAGAGCgctgCTTAGTGTAGATTGGGC

Journal Pre-proof

Supplementary Table 2. CRISPR screen data

| id         | num | neg score  | neg p-value | neg fdr  | neg rank | neg goodsgrna | neg lfc  | pos score | pos p-value | pos fdr  | pos rank | pos goodsgrna | pos lfc |
|------------|-----|------------|-------------|----------|----------|---------------|----------|-----------|-------------|----------|----------|---------------|---------|
| KIF23      | 5   | 3.48E-06   | 5.00E-06    | 0.000107 | 1        | 5             | -1.5397  | 1         | 1           | 0.999995 | 43       | 0             | 0       |
| ANLN       | 5   | 5.07E-06   | 5.00E-06    | 0.000107 | 2        | 5             | -1.3675  | 0.99999   | 1           | 0.999995 | 42       | 0             | 0       |
| TEAD3      | 5   | 8.50E-05   | 0.0003348   | 0.004799 | 3        | 4             | -1.2358  | 0.99935   | 0.99924     | 0.999995 | 41       | 0             | 0       |
| TEAD1      | 5   | 0.00035579 | 0.0014941   | 0.016029 | 4        | 4             | -0.54167 | 0.85359   | 0.85286     | 0.999995 | 32       | 0             | 0       |
| NDC80      | 5   | 0.00046033 | 0.0018639   | 0.016029 | 5        | 4             | -2.5375  | 0.99247   | 0.99181     | 0.999995 | 39       | 0             | 0       |
| PLEKHH1    | 5   | 0.0022734  | 0.0079202   | 0.056761 | 6        | 4             | -0.25741 | 0.91696   | 0.91609     | 0.999995 | 35       | 0             | 0       |
| DIAP3      | 5   | 0.017366   | 0.045927    | 0.274146 | 7        | 3             | -0.34207 | 0.99853   | 0.99827     | 0.999995 | 40       | 0             | 0       |
| E2F2       | 5   | 0.019858   | 0.051004    | 0.274146 | 8        | 3             | -0.2302  | 0.49747   | 0.53774     | 0.999995 | 20       | 1             | 0.15398 |
| BUB1B      | 5   | 0.025466   | 0.063506    | 0.303419 | 9        | 3             | -0.26969 | 0.95354   | 0.9529      | 0.999995 | 37       | 0             | 0       |
| NUF2       | 5   | 0.054335   | 0.12236     | 0.52615  | 10       | 3             | -0.62258 | 0.054335  | 0.1227      | 0.966941 | 5        | 2             | 0.35597 |
| HMGA2      | 5   | 0.086137   | 0.16461     | 0.643493 | 11       | 2             | -0.26038 | 0.84306   | 0.84214     | 0.999995 | 31       | 0             | 0       |
| ECT2       | 5   | 0.14197    | 0.23522     | 0.83027  | 12       | 1             | -0.53952 | 0.15592   | 0.25827     | 0.999995 | 11       | 1             | 0.25727 |
| TEAD4      | 5   | 0.15465    | 0.25101     | 0.83027  | 13       | 2             | -0.19956 | 0.069417  | 0.15246     | 0.966941 | 6        | 2             | 0.2903  |
| HKDC1      | 5   | 0.19014    | 0.29399     | 0.902956 | 14       | 2             | -0.1927  | 0.93991   | 0.93923     | 0.999995 | 36       | 0             | 0       |
| BUB1       | 5   | 0.22109    | 0.33359     | 0.938104 | 15       | 2             | -0.15486 | 0.60572   | 0.61561     | 0.999995 | 24       | 1             | 0.13894 |
| ESCO2      | 5   | 0.23375    | 0.34906     | 0.938104 | 16       | 2             | -0.21146 | 0.87597   | 0.87562     | 0.999995 | 33       | 0             | 0       |
| TEAD2      | 5   | 0.30964    | 0.40843     | 0.969934 | 17       | 1             | -0.34102 | 0.51552   | 0.5499      | 0.999995 | 21       | 1             | 0.22005 |
| MELK       | 5   | 0.46941    | 0.50541     | 0.969934 | 18       | 1             | -0.41814 | 0.027576  | 0.069183    | 0.966941 | 3        | 2             | 0.31947 |
| OLFML2B    | 5   | 0.4789     | 0.51207     | 0.969934 | 19       | 1             | -0.21186 | 0.012003  | 0.035783    | 0.769338 | 2        | 3             | 0.16712 |
| NCAPG      | 5   | 0.53304    | 0.55178     | 0.969934 | 20       | 1             | -0.1898  | 0.24014   | 0.35831     | 0.999995 | 14       | 2             | 0.17415 |
| MAP3K9     | 5   | 0.57463    | 0.58395     | 0.969934 | 21       | 1             | -0.10527 | 0.96671   | 0.96632     | 0.999995 | 38       | 0             | 0       |
| KRT17      | 5   | 0.59812    | 0.60336     | 0.969934 | 22       | 1             | -0.1613  | 0.40951   | 0.48387     | 0.999995 | 18       | 1             | 0.30813 |
| CYBB       | 5   | 0.60572    | 0.60945     | 0.969934 | 23       | 1             | -0.18905 | 0.4789    | 0.52567     | 0.999995 | 19       | 1             | 0.10205 |
| NHEJ1      | 5   | 0.63497    | 0.63561     | 0.969934 | 24       | 1             | -0.12988 | 0.69445   | 0.69291     | 0.999995 | 25       | 1             | 0.13237 |
| PGF        | 5   | 0.64892    | 0.64868     | 0.969934 | 25       | 1             | -0.22379 | 0.14197   | 0.24157     | 0.999995 | 10       | 1             | 0.28872 |
| ALOXE3     | 5   | 0.69445    | 0.69279     | 0.969934 | 26       | 0             | 0        | 0.7296    | 0.72808     | 0.999995 | 27       | 0             | 0       |
| CDSN       | 5   | 0.70655    | 0.70449     | 0.969934 | 27       | 0             | 0        | 0.099004  | 0.18957     | 0.999995 | 9        | 2             | 0.25678 |
| RPP25      | 5   | 0.71246    | 0.71017     | 0.969934 | 28       | 0             | 0        | 0.5416    | 0.56824     | 0.999995 | 23       | 1             | 0.18345 |
| GPR84      | 5   | 0.75635    | 0.75533     | 0.969934 | 29       | 0             | 0        | 0.52434   | 0.55592     | 0.999995 | 22       | 1             | 0.13139 |
| IGF2BP3    | 5   | 0.81612    | 0.81465     | 0.969934 | 30       | 0             | 0        | 0.29776   | 0.42378     | 0.999995 | 17       | 1             | 0.23444 |
| ASPM       | 5   | 0.82018    | 0.81865     | 0.969934 | 31       | 0             | 0        | 0.83571   | 0.83485     | 0.999995 | 30       | 0             | 0       |
| KIF14      | 5   | 0.82808    | 0.82708     | 0.969934 | 32       | 0             | 0        | 0.90311   | 0.90236     | 0.999995 | 34       | 0             | 0       |
| MAMSTR     | 5   | 0.83571    | 0.83485     | 0.969934 | 33       | 0             | 0        | 0.045386  | 0.1053      | 0.966941 | 4        | 3             | 0.13911 |
| ENAH       | 5   | 0.84663    | 0.84575     | 0.969934 | 34       | 0             | 0        | 0.26597   | 0.38818     | 0.999995 | 15       | 2             | 0.21559 |
| ACBD7      | 5   | 0.85697    | 0.85642     | 0.969934 | 35       | 0             | 0        | 0.22109   | 0.33618     | 0.999995 | 12       | 2             | 0.12408 |
| CDCA2      | 5   | 0.86354    | 0.86295     | 0.969934 | 36       | 0             | 0        | 0.74057   | 0.73982     | 0.999995 | 28       | 0             | 0       |
| PLCH1      | 5   | 0.88468    | 0.88415     | 0.969934 | 37       | 0             | 0        | 0.27905   | 0.40359     | 0.999995 | 16       | 2             | 0.10355 |
| CDC20      | 5   | 0.89552    | 0.89502     | 0.969934 | 38       | 0             | 0        | 0.22298   | 0.33858     | 0.999995 | 13       | 1             | 0.26261 |
| FAM78B     | 5   | 0.93291    | 0.93204     | 0.969934 | 39       | 0             | 0        | 0.70655   | 0.70449     | 0.999995 | 26       | 0             | 0       |
| VASH2      | 5   | 0.93472    | 0.93394     | 0.969934 | 40       | 0             | 0        | 0.7902    | 0.78929     | 0.999995 | 29       | 0             | 0       |
| SOX11      | 5   | 0.93649    | 0.93582     | 0.969934 | 41       | 0             | 0        | 0.072402  | 0.15741     | 0.966941 | 8        | 2             | 0.20357 |
| CDKN2A     | 10  | 0.94772    | 0.94738     | 0.969934 | 42       | 0             | 0        | 0.0005826 | 0.0033829   | 0.145466 | 1        | 5             | 0.56921 |
| NEGATIVE_C | 100 | 0.99999    | 1           | 0.999995 | 43       | 5             | -0.19481 | 0.071094  | 0.34291     | 0.999995 | 7        | 27            | 0.22126 |

**Supplementary Table 3. RNA-seq comparing control with TAZ+CCI4-induced HCC**

|                | baseMean<br>(intermediate mean<br>of normalized counts<br>for all samples) | log2FoldChange<br>Control liver vs TAZ+CCI <sub>4</sub><br>induced HCC | lfcSE<br>(standard error) | stat<br>(Wald statistic) | Wald test p value<br>Control liver vs TAZ+CCI <sub>4</sub><br>induced HCC | Benjamini-Hochberg<br>adjusted p value<br>Control liver vs<br>TAZ+CCI <sub>4</sub> induced HCC |
|----------------|----------------------------------------------------------------------------|------------------------------------------------------------------------|---------------------------|--------------------------|---------------------------------------------------------------------------|------------------------------------------------------------------------------------------------|
| 1110025L11Rik  | 0                                                                          | NA                                                                     | NA                        | NA                       | NA                                                                        | NA                                                                                             |
| 1110057P08Rik  | 0                                                                          | NA                                                                     | NA                        | NA                       | NA                                                                        | NA                                                                                             |
| 1500009C09Rik  | 0                                                                          | NA                                                                     | NA                        | NA                       | NA                                                                        | NA                                                                                             |
| 1700001C02Rik  | 0                                                                          | NA                                                                     | NA                        | NA                       | NA                                                                        | NA                                                                                             |
| 1700001F09Rik  | 0                                                                          | NA                                                                     | NA                        | NA                       | NA                                                                        | NA                                                                                             |
| 1700001J11Rik  | 0                                                                          | NA                                                                     | NA                        | NA                       | NA                                                                        | NA                                                                                             |
| 1700001K19Rik  | 0                                                                          | NA                                                                     | NA                        | NA                       | NA                                                                        | NA                                                                                             |
| 1700003H04Rik  | 0                                                                          | NA                                                                     | NA                        | NA                       | NA                                                                        | NA                                                                                             |
| 1700003N22Rik  | 0                                                                          | NA                                                                     | NA                        | NA                       | NA                                                                        | NA                                                                                             |
| 1700006A11Rik  | 0                                                                          | NA                                                                     | NA                        | NA                       | NA                                                                        | NA                                                                                             |
| 1700008P02Rik  | 0                                                                          | NA                                                                     | NA                        | NA                       | NA                                                                        | NA                                                                                             |
| 1700010B08Rik  | 0                                                                          | NA                                                                     | NA                        | NA                       | NA                                                                        | NA                                                                                             |
| 1700010N08Rik  | 0                                                                          | NA                                                                     | NA                        | NA                       | NA                                                                        | NA                                                                                             |
| 1700011M02Rik  | 0                                                                          | NA                                                                     | NA                        | NA                       | NA                                                                        | NA                                                                                             |
| 1700012A03Rik  | 0                                                                          | NA                                                                     | NA                        | NA                       | NA                                                                        | NA                                                                                             |
| 1700012B09Rik  | 0                                                                          | NA                                                                     | NA                        | NA                       | NA                                                                        | NA                                                                                             |
| 1700012P22Rik  | 0                                                                          | NA                                                                     | NA                        | NA                       | NA                                                                        | NA                                                                                             |
| 1700013D24Rik  | 0                                                                          | NA                                                                     | NA                        | NA                       | NA                                                                        | NA                                                                                             |
| 1700013G24Rik  | 0                                                                          | NA                                                                     | NA                        | NA                       | NA                                                                        | NA                                                                                             |
| 1700013H16Rik  | 0                                                                          | NA                                                                     | NA                        | NA                       | NA                                                                        | NA                                                                                             |
| 1700015G11Rik  | 0                                                                          | NA                                                                     | NA                        | NA                       | NA                                                                        | NA                                                                                             |
| 1700016K19Rik  | 0                                                                          | NA                                                                     | NA                        | NA                       | NA                                                                        | NA                                                                                             |
| 1700017N19Rik  | 0                                                                          | NA                                                                     | NA                        | NA                       | NA                                                                        | NA                                                                                             |
| 1700018F24Rik  | 0                                                                          | NA                                                                     | NA                        | NA                       | NA                                                                        | NA                                                                                             |
| 1700018G05Rik  | 0                                                                          | NA                                                                     | NA                        | NA                       | NA                                                                        | NA                                                                                             |
| 1700019M22Rik  | 0                                                                          | NA                                                                     | NA                        | NA                       | NA                                                                        | NA                                                                                             |
| 1700020A23Rik  | 0                                                                          | NA                                                                     | NA                        | NA                       | NA                                                                        | NA                                                                                             |
| 1700020N15Rik  | 0                                                                          | NA                                                                     | NA                        | NA                       | NA                                                                        | NA                                                                                             |
| 1700021F07Rik  | 0                                                                          | NA                                                                     | NA                        | NA                       | NA                                                                        | NA                                                                                             |
| 1700022I11Rik  | 0                                                                          | NA                                                                     | NA                        | NA                       | NA                                                                        | NA                                                                                             |
| 1700024G13Rik  | 0                                                                          | NA                                                                     | NA                        | NA                       | NA                                                                        | NA                                                                                             |
| 1700024P04Rik  | 0                                                                          | NA                                                                     | NA                        | NA                       | NA                                                                        | NA                                                                                             |
| 1700028P14Rik  | 0                                                                          | NA                                                                     | NA                        | NA                       | NA                                                                        | NA                                                                                             |
| 1700029P11Rik  | 0                                                                          | NA                                                                     | NA                        | NA                       | NA                                                                        | NA                                                                                             |
| 1700031F05Rik  | 0                                                                          | NA                                                                     | NA                        | NA                       | NA                                                                        | NA                                                                                             |
| 1700031M16Rik  | 0                                                                          | NA                                                                     | NA                        | NA                       | NA                                                                        | NA                                                                                             |
| 1700034E13Rik  | 0                                                                          | NA                                                                     | NA                        | NA                       | NA                                                                        | NA                                                                                             |
| 1700040F15Rik  | 0                                                                          | NA                                                                     | NA                        | NA                       | NA                                                                        | NA                                                                                             |
| 1700042G07Rik  | 0                                                                          | NA                                                                     | NA                        | NA                       | NA                                                                        | NA                                                                                             |
| 1700049E17Rik1 | 0                                                                          | NA                                                                     | NA                        | NA                       | NA                                                                        | NA                                                                                             |
| 1700049E17Rik2 | 0                                                                          | NA                                                                     | NA                        | NA                       | NA                                                                        | NA                                                                                             |
| 1700063K16Rik  | 0                                                                          | NA                                                                     | NA                        | NA                       | NA                                                                        | NA                                                                                             |
| 1700064H15Rik  | 0                                                                          | NA                                                                     | NA                        | NA                       | NA                                                                        | NA                                                                                             |
| 1700065I16Rik  | 0                                                                          | NA                                                                     | NA                        | NA                       | NA                                                                        | NA                                                                                             |
| 1700067P10Rik  | 0                                                                          | NA                                                                     | NA                        | NA                       | NA                                                                        | NA                                                                                             |
| 1700069L16Rik  | 0                                                                          | NA                                                                     | NA                        | NA                       | NA                                                                        | NA                                                                                             |
| 1700074P13Rik  | 0                                                                          | NA                                                                     | NA                        | NA                       | NA                                                                        | NA                                                                                             |
| 1700080O16Rik  | 0                                                                          | NA                                                                     | NA                        | NA                       | NA                                                                        | NA                                                                                             |
| 1700084J12Rik  | 0                                                                          | NA                                                                     | NA                        | NA                       | NA                                                                        | NA                                                                                             |
| 1700086L19Rik  | 0                                                                          | NA                                                                     | NA                        | NA                       | NA                                                                        | NA                                                                                             |
| 1700122O11Rik  | 0                                                                          | NA                                                                     | NA                        | NA                       | NA                                                                        | NA                                                                                             |
| 1700123L14Rik  | 0                                                                          | NA                                                                     | NA                        | NA                       | NA                                                                        | NA                                                                                             |
| 1810009J06Rik  | 0                                                                          | NA                                                                     | NA                        | NA                       | NA                                                                        | NA                                                                                             |
| 1810065E05Rik  | 0                                                                          | NA                                                                     | NA                        | NA                       | NA                                                                        | NA                                                                                             |
| 2010010A06Rik  | 0                                                                          | NA                                                                     | NA                        | NA                       | NA                                                                        | NA                                                                                             |
| 2210409E12Rik  | 0                                                                          | NA                                                                     | NA                        | NA                       | NA                                                                        | NA                                                                                             |
| 2300002M23Rik  | 0                                                                          | NA                                                                     | NA                        | NA                       | NA                                                                        | NA                                                                                             |
| 2300003K06Rik  | 0                                                                          | NA                                                                     | NA                        | NA                       | NA                                                                        | NA                                                                                             |
| 2310002L09Rik  | 0                                                                          | NA                                                                     | NA                        | NA                       | NA                                                                        | NA                                                                                             |
| 2310003L06Rik  | 0                                                                          | NA                                                                     | NA                        | NA                       | NA                                                                        | NA                                                                                             |
| 2310034C09Rik  | 0                                                                          | NA                                                                     | NA                        | NA                       | NA                                                                        | NA                                                                                             |

|               |      |    |    |    |    |
|---------------|------|----|----|----|----|
| 2310046K23Rik | 0 NA | NA | NA | NA | NA |
| 2310050C09Rik | 0 NA | NA | NA | NA | NA |
| 2310057N15Rik | 0 NA | NA | NA | NA | NA |
| 2310061N02Rik | 0 NA | NA | NA | NA | NA |
| 2310079G19Rik | 0 NA | NA | NA | NA | NA |
| 2410137M14Rik | 0 NA | NA | NA | NA | NA |
| 2900092C05Rik | 0 NA | NA | NA | NA | NA |
| 3110009M11Rik | 0 NA | NA | NA | NA | NA |
| 3110018I06Rik | 0 NA | NA | NA | NA | NA |
| 3110040M04Rik | 0 NA | NA | NA | NA | NA |
| 3110082J24Rik | 0 NA | NA | NA | NA | NA |
| 3830417A13Rik | 0 NA | NA | NA | NA | NA |
| 4833418N17Rik | 0 NA | NA | NA | NA | NA |
| 4921504E06Rik | 0 NA | NA | NA | NA | NA |
| 4921509C19Rik | 0 NA | NA | NA | NA | NA |
| 4921511C20Rik | 0 NA | NA | NA | NA | NA |
| 4921517D22Rik | 0 NA | NA | NA | NA | NA |
| 4921524L21Rik | 0 NA | NA | NA | NA | NA |
| 4921539E11Rik | 0 NA | NA | NA | NA | NA |
| 4930402F06Rik | 0 NA | NA | NA | NA | NA |
| 4930402K13Rik | 0 NA | NA | NA | NA | NA |
| 4930404H24Rik | 0 NA | NA | NA | NA | NA |
| 4930407I10Rik | 0 NA | NA | NA | NA | NA |
| 4930415H17Rik | 0 NA | NA | NA | NA | NA |
| 4930415L06Rik | 0 NA | NA | NA | NA | NA |
| 4930421P07Rik | 0 NA | NA | NA | NA | NA |
| 4930432E11Rik | 0 NA | NA | NA | NA | NA |
| 4930432M17Rik | 0 NA | NA | NA | NA | NA |
| 4930433I11Rik | 0 NA | NA | NA | NA | NA |
| 4930447A16Rik | 0 NA | NA | NA | NA | NA |
| 4930447F04Rik | 0 NA | NA | NA | NA | NA |
| 4930449A18Rik | 0 NA | NA | NA | NA | NA |
| 4930449I24Rik | 0 NA | NA | NA | NA | NA |
| 4930451I11Rik | 0 NA | NA | NA | NA | NA |
| 4930470P17Rik | 0 NA | NA | NA | NA | NA |
| 4930471M09Rik | 0 NA | NA | NA | NA | NA |
| 4930480E11Rik | 0 NA | NA | NA | NA | NA |
| 4930488N24Rik | 0 NA | NA | NA | NA | NA |
| 4930503B20Rik | 0 NA | NA | NA | NA | NA |
| 4930503E24Rik | 0 NA | NA | NA | NA | NA |
| 4930503H13Rik | 0 NA | NA | NA | NA | NA |
| 4930515G16Rik | 0 NA | NA | NA | NA | NA |
| 4930519F16Rik | 0 NA | NA | NA | NA | NA |
| 4930522H14Rik | 0 NA | NA | NA | NA | NA |
| 4930524B15Rik | 0 NA | NA | NA | NA | NA |
| 4930546C10Rik | 0 NA | NA | NA | NA | NA |
| 4930550L24Rik | 0 NA | NA | NA | NA | NA |
| 4930553M12Rik | 0 NA | NA | NA | NA | NA |
| 4930555G01Rik | 0 NA | NA | NA | NA | NA |
| 4930558C23Rik | 0 NA | NA | NA | NA | NA |
| 4930558K02Rik | 0 NA | NA | NA | NA | NA |
| 4930563M21Rik | 0 NA | NA | NA | NA | NA |
| 4930564D02Rik | 0 NA | NA | NA | NA | NA |
| 4930567H17Rik | 0 NA | NA | NA | NA | NA |
| 4930568D16Rik | 0 NA | NA | NA | NA | NA |
| 4930572O03Rik | 0 NA | NA | NA | NA | NA |
| 4930578I06Rik | 0 NA | NA | NA | NA | NA |
| 4930583I09Rik | 0 NA | NA | NA | NA | NA |
| 4930595D18Rik | 0 NA | NA | NA | NA | NA |
| 4930595M18Rik | 0 NA | NA | NA | NA | NA |
| 4930596D02Rik | 0 NA | NA | NA | NA | NA |
| 4931400O07Rik | 0 NA | NA | NA | NA | NA |
| 4931408C20Rik | 0 NA | NA | NA | NA | NA |
| 4931417E11Rik | 0 NA | NA | NA | NA | NA |
| 4932415M13Rik | 0 NA | NA | NA | NA | NA |
| 4932429P05Rik | 0 NA | NA | NA | NA | NA |

|               |      |    |    |    |    |
|---------------|------|----|----|----|----|
| 4932431P20Rik | 0 NA | NA | NA | NA | NA |
| 4933400A11Rik | 0 NA | NA | NA | NA | NA |
| 4933401B06Rik | 0 NA | NA | NA | NA | NA |
| 4933402E13Rik | 0 NA | NA | NA | NA | NA |
| 4933402J07Rik | 0 NA | NA | NA | NA | NA |
| 4933402N03Rik | 0 NA | NA | NA | NA | NA |
| 4933402N22Rik | 0 NA | NA | NA | NA | NA |
| 4933405O20Rik | 0 NA | NA | NA | NA | NA |
| 4933409G03Rik | 0 NA | NA | NA | NA | NA |
| 4933412E24Rik | 0 NA | NA | NA | NA | NA |
| 4933414I15Rik | 0 NA | NA | NA | NA | NA |
| 4933416E14Rik | 0 NA | NA | NA | NA | NA |
| 4933416I08Rik | 0 NA | NA | NA | NA | NA |
| 4933417A18Rik | 0 NA | NA | NA | NA | NA |
| 4933428G20Rik | 0 NA | NA | NA | NA | NA |
| 4933428M09Rik | 0 NA | NA | NA | NA | NA |
| 4933436I01Rik | 0 NA | NA | NA | NA | NA |
| 5031410I06Rik | 0 NA | NA | NA | NA | NA |
| 5033404E19Rik | 0 NA | NA | NA | NA | NA |
| 5330417H12Rik | 0 NA | NA | NA | NA | NA |
| 5430401F13Rik | 0 NA | NA | NA | NA | NA |
| 5430402E10Rik | 0 NA | NA | NA | NA | NA |
| 5530400C23Rik | 0 NA | NA | NA | NA | NA |
| 6030452D12Rik | 0 NA | NA | NA | NA | NA |
| 6030469F06Rik | 0 NA | NA | NA | NA | NA |
| 6430628N08Rik | 0 NA | NA | NA | NA | NA |
| 7420426K07Rik | 0 NA | NA | NA | NA | NA |
| 8030423J24Rik | 0 NA | NA | NA | NA | NA |
| 9230102O04Rik | 0 NA | NA | NA | NA | NA |
| 9230112D13Rik | 0 NA | NA | NA | NA | NA |
| 9430097D07Rik | 0 NA | NA | NA | NA | NA |
| 9530002B09Rik | 0 NA | NA | NA | NA | NA |
| 9530003J23Rik | 0 NA | NA | NA | NA | NA |
| 9630041A04Rik | 0 NA | NA | NA | NA | NA |
| A030003K21Rik | 0 NA | NA | NA | NA | NA |
| A030005K14Rik | 0 NA | NA | NA | NA | NA |
| A030014E15Rik | 0 NA | NA | NA | NA | NA |
| A230072I06Rik | 0 NA | NA | NA | NA | NA |
| A26c2         | 0 NA | NA | NA | NA | NA |
| A330070K13Rik | 0 NA | NA | NA | NA | NA |
| A430060F13Rik | 0 NA | NA | NA | NA | NA |
| A930003A15Rik | 0 NA | NA | NA | NA | NA |
| A930009A15Rik | 0 NA | NA | NA | NA | NA |
| A930017K11Rik | 0 NA | NA | NA | NA | NA |
| AA543401      | 0 NA | NA | NA | NA | NA |
| AA619741      | 0 NA | NA | NA | NA | NA |
| AA623943      | 0 NA | NA | NA | NA | NA |
| Aadacl2       | 0 NA | NA | NA | NA | NA |
| Aadacl2fm1    | 0 NA | NA | NA | NA | NA |
| Aadacl2fm2    | 0 NA | NA | NA | NA | NA |
| Aadacl2fm3    | 0 NA | NA | NA | NA | NA |
| Aadacl3       | 0 NA | NA | NA | NA | NA |
| Aadacl4       | 0 NA | NA | NA | NA | NA |
| Aadacl4fm1    | 0 NA | NA | NA | NA | NA |
| Aadacl4fm2    | 0 NA | NA | NA | NA | NA |
| Aadacl4fm3    | 0 NA | NA | NA | NA | NA |
| Aadacl4fm4    | 0 NA | NA | NA | NA | NA |
| Aadacl4fm5    | 0 NA | NA | NA | NA | NA |
| Aanat         | 0 NA | NA | NA | NA | NA |
| Abca16        | 0 NA | NA | NA | NA | NA |
| Abcb5         | 0 NA | NA | NA | NA | NA |
| Abhd16b       | 0 NA | NA | NA | NA | NA |
| Abo           | 0 NA | NA | NA | NA | NA |
| AC073947.1    | 0 NA | NA | NA | NA | NA |
| AC087559.1    | 0 NA | NA | NA | NA | NA |
| AC087559.2    | 0 NA | NA | NA | NA | NA |



|            |      |    |    |    |    |
|------------|------|----|----|----|----|
| AC087559.3 | 0 NA | NA | NA | NA | NA |
| AC093451.1 | 0 NA | NA | NA | NA | NA |
| AC102264.1 | 0 NA | NA | NA | NA | NA |
| AC102264.2 | 0 NA | NA | NA | NA | NA |
| AC109138.1 | 0 NA | NA | NA | NA | NA |
| AC113292.1 | 0 NA | NA | NA | NA | NA |
| AC117188.1 | 0 NA | NA | NA | NA | NA |
| AC117663.2 | 0 NA | NA | NA | NA | NA |
| AC119987.1 | 0 NA | NA | NA | NA | NA |
| AC120011.1 | 0 NA | NA | NA | NA | NA |
| AC121298.1 | 0 NA | NA | NA | NA | NA |
| AC123873.2 | 0 NA | NA | NA | NA | NA |
| AC123873.3 | 0 NA | NA | NA | NA | NA |
| AC124542.1 | 0 NA | NA | NA | NA | NA |
| AC124606.1 | 0 NA | NA | NA | NA | NA |
| AC124606.2 | 0 NA | NA | NA | NA | NA |
| AC125149.2 | 0 NA | NA | NA | NA | NA |
| AC125149.4 | 0 NA | NA | NA | NA | NA |
| AC125149.5 | 0 NA | NA | NA | NA | NA |
| AC125178.1 | 0 NA | NA | NA | NA | NA |
| AC125178.2 | 0 NA | NA | NA | NA | NA |
| AC125178.3 | 0 NA | NA | NA | NA | NA |
| AC126035.1 | 0 NA | NA | NA | NA | NA |
| AC132444.3 | 0 NA | NA | NA | NA | NA |
| AC132444.5 | 0 NA | NA | NA | NA | NA |
| AC133103.1 | 0 NA | NA | NA | NA | NA |
| AC133103.4 | 0 NA | NA | NA | NA | NA |
| AC133103.5 | 0 NA | NA | NA | NA | NA |
| AC134333.1 | 0 NA | NA | NA | NA | NA |
| AC139209.1 | 0 NA | NA | NA | NA | NA |
| AC140267.1 | 0 NA | NA | NA | NA | NA |
| AC140325.1 | 0 NA | NA | NA | NA | NA |
| AC140325.2 | 0 NA | NA | NA | NA | NA |
| AC140325.3 | 0 NA | NA | NA | NA | NA |
| AC147512.2 | 0 NA | NA | NA | NA | NA |
| AC154679.2 | 0 NA | NA | NA | NA | NA |
| AC161520.1 | 0 NA | NA | NA | NA | NA |
| AC163611.1 | 0 NA | NA | NA | NA | NA |
| AC163611.2 | 0 NA | NA | NA | NA | NA |
| AC164084.2 | 0 NA | NA | NA | NA | NA |
| AC164084.3 | 0 NA | NA | NA | NA | NA |
| AC165294.1 | 0 NA | NA | NA | NA | NA |
| AC165294.2 | 0 NA | NA | NA | NA | NA |
| AC165294.3 | 0 NA | NA | NA | NA | NA |
| AC166710.1 | 0 NA | NA | NA | NA | NA |
| AC174780.1 | 0 NA | NA | NA | NA | NA |
| AC202135.1 | 0 NA | NA | NA | NA | NA |
| AC234645.1 | 0 NA | NA | NA | NA | NA |
| AC240971.1 | 0 NA | NA | NA | NA | NA |
| AC240971.3 | 0 NA | NA | NA | NA | NA |
| AC241534.1 | 0 NA | NA | NA | NA | NA |
| AC243907.1 | 0 NA | NA | NA | NA | NA |
| Accs1      | 0 NA | NA | NA | NA | NA |
| Ace3       | 0 NA | NA | NA | NA | NA |
| Acp4       | 0 NA | NA | NA | NA | NA |
| Acte1      | 0 NA | NA | NA | NA | NA |
| Actl11     | 0 NA | NA | NA | NA | NA |
| Actl6b     | 0 NA | NA | NA | NA | NA |
| Actl7a     | 0 NA | NA | NA | NA | NA |
| Actrt1     | 0 NA | NA | NA | NA | NA |
| Actrt2     | 0 NA | NA | NA | NA | NA |
| Actrt3     | 0 NA | NA | NA | NA | NA |
| Adad2      | 0 NA | NA | NA | NA | NA |
| Adam18     | 0 NA | NA | NA | NA | NA |
| Adam1b     | 0 NA | NA | NA | NA | NA |
| Adam20     | 0 NA | NA | NA | NA | NA |

|            |      |    |    |    |    |
|------------|------|----|----|----|----|
| Adam24     | 0 NA | NA | NA | NA | NA |
| Adam26a    | 0 NA | NA | NA | NA | NA |
| Adam26b    | 0 NA | NA | NA | NA | NA |
| Adam29     | 0 NA | NA | NA | NA | NA |
| Adam30     | 0 NA | NA | NA | NA | NA |
| Adam34     | 0 NA | NA | NA | NA | NA |
| Adam34l    | 0 NA | NA | NA | NA | NA |
| Adam39     | 0 NA | NA | NA | NA | NA |
| Adam6a     | 0 NA | NA | NA | NA | NA |
| Adam6b     | 0 NA | NA | NA | NA | NA |
| Adcyap1    | 0 NA | NA | NA | NA | NA |
| Adgrd2-ps  | 0 NA | NA | NA | NA | NA |
| AF067063   | 0 NA | NA | NA | NA | NA |
| Agr3       | 0 NA | NA | NA | NA | NA |
| Agtr1b     | 0 NA | NA | NA | NA | NA |
| Agtr2      | 0 NA | NA | NA | NA | NA |
| AK157302   | 0 NA | NA | NA | NA | NA |
| Ak3l2-ps   | 0 NA | NA | NA | NA | NA |
| Akain1     | 0 NA | NA | NA | NA | NA |
| Akirin1-ps | 0 NA | NA | NA | NA | NA |
| AL607142.1 | 0 NA | NA | NA | NA | NA |
| AL645849.2 | 0 NA | NA | NA | NA | NA |
| AL929555.1 | 0 NA | NA | NA | NA | NA |
| Aldoa-ps3  | 0 NA | NA | NA | NA | NA |
| Alkal1     | 0 NA | NA | NA | NA | NA |
| Alkal2     | 0 NA | NA | NA | NA | NA |
| Allc       | 0 NA | NA | NA | NA | NA |
| Alppl2     | 0 NA | NA | NA | NA | NA |
| Alx3       | 0 NA | NA | NA | NA | NA |
| Ambn       | 0 NA | NA | NA | NA | NA |
| Amd-ps3    | 0 NA | NA | NA | NA | NA |
| Amd-ps5    | 0 NA | NA | NA | NA | NA |
| Amd-ps6    | 0 NA | NA | NA | NA | NA |
| Amelx      | 0 NA | NA | NA | NA | NA |
| Amer3      | 0 NA | NA | NA | NA | NA |
| Amtn       | 0 NA | NA | NA | NA | NA |
| Amy2-ps1   | 0 NA | NA | NA | NA | NA |
| Amy2b      | 0 NA | NA | NA | NA | NA |
| Ang-ps1    | 0 NA | NA | NA | NA | NA |
| Ang-ps2    | 0 NA | NA | NA | NA | NA |
| Ang-ps3    | 0 NA | NA | NA | NA | NA |
| Ang2       | 0 NA | NA | NA | NA | NA |
| Ang4       | 0 NA | NA | NA | NA | NA |
| Ang5       | 0 NA | NA | NA | NA | NA |
| Ang6       | 0 NA | NA | NA | NA | NA |
| Ankar      | 0 NA | NA | NA | NA | NA |
| Ankfn1     | 0 NA | NA | NA | NA | NA |
| Ankrd60    | 0 NA | NA | NA | NA | NA |
| Antxrl     | 0 NA | NA | NA | NA | NA |
| Ap3s1-ps1  | 0 NA | NA | NA | NA | NA |
| Api5-ps    | 0 NA | NA | NA | NA | NA |
| Apobec4    | 0 NA | NA | NA | NA | NA |
| Apol10c-ps | 0 NA | NA | NA | NA | NA |
| Apol11a    | 0 NA | NA | NA | NA | NA |
| Apoo-ps    | 0 NA | NA | NA | NA | NA |
| Aqp10-ps   | 0 NA | NA | NA | NA | NA |
| Aqp2       | 0 NA | NA | NA | NA | NA |
| Aqp6       | 0 NA | NA | NA | NA | NA |
| Arid3c     | 0 NA | NA | NA | NA | NA |
| Arl13a     | 0 NA | NA | NA | NA | NA |
| Armcd4     | 0 NA | NA | NA | NA | NA |
| Arr3       | 0 NA | NA | NA | NA | NA |
| Arrdc5     | 0 NA | NA | NA | NA | NA |
| Asb17      | 0 NA | NA | NA | NA | NA |
| Ascl1      | 0 NA | NA | NA | NA | NA |
| Ascl5      | 0 NA | NA | NA | NA | NA |

|               |      |    |    |    |    |
|---------------|------|----|----|----|----|
| Ass-ps1       | 0 NA | NA | NA | NA | NA |
| Astl          | 0 NA | NA | NA | NA | NA |
| Atg4a-ps      | 0 NA | NA | NA | NA | NA |
| Atoh1         | 0 NA | NA | NA | NA | NA |
| Atp12a        | 0 NA | NA | NA | NA | NA |
| Atp1b4        | 0 NA | NA | NA | NA | NA |
| Atp4b         | 0 NA | NA | NA | NA | NA |
| Atp5k-ps2     | 0 NA | NA | NA | NA | NA |
| Atp5l-ps1     | 0 NA | NA | NA | NA | NA |
| Atp5pb-ps     | 0 NA | NA | NA | NA | NA |
| Atp6ap1l      | 0 NA | NA | NA | NA | NA |
| Atp6v0c-ps1   | 0 NA | NA | NA | NA | NA |
| Atp6v1e2      | 0 NA | NA | NA | NA | NA |
| AU022133      | 0 NA | NA | NA | NA | NA |
| AU022751      | 0 NA | NA | NA | NA | NA |
| AV320801      | 0 NA | NA | NA | NA | NA |
| Avp           | 0 NA | NA | NA | NA | NA |
| Avpr2         | 0 NA | NA | NA | NA | NA |
| AW822073      | 0 NA | NA | NA | NA | NA |
| Awat1         | 0 NA | NA | NA | NA | NA |
| AY358078      | 0 NA | NA | NA | NA | NA |
| AY761185      | 0 NA | NA | NA | NA | NA |
| Aym1          | 0 NA | NA | NA | NA | NA |
| B020004C17Rik | 0 NA | NA | NA | NA | NA |
| B230104I21Rik | 0 NA | NA | NA | NA | NA |
| B230207O21Rik | 0 NA | NA | NA | NA | NA |
| B3gat2        | 0 NA | NA | NA | NA | NA |
| Banf2         | 0 NA | NA | NA | NA | NA |
| BB014433      | 0 NA | NA | NA | NA | NA |
| BB287469      | 0 NA | NA | NA | NA | NA |
| BC030500      | 0 NA | NA | NA | NA | NA |
| BC051665      | 0 NA | NA | NA | NA | NA |
| Bcl2a1c       | 0 NA | NA | NA | NA | NA |
| Best2         | 0 NA | NA | NA | NA | NA |
| Bglap         | 0 NA | NA | NA | NA | NA |
| Bglap2        | 0 NA | NA | NA | NA | NA |
| Bhlha9        | 0 NA | NA | NA | NA | NA |
| Bhlhe23       | 0 NA | NA | NA | NA | NA |
| Birc7         | 0 NA | NA | NA | NA | NA |
| Bloc1s2-ps    | 0 NA | NA | NA | NA | NA |
| Bnip3l-ps     | 0 NA | NA | NA | NA | NA |
| Bpi           | 0 NA | NA | NA | NA | NA |
| Bpifa1        | 0 NA | NA | NA | NA | NA |
| Bpifa2        | 0 NA | NA | NA | NA | NA |
| Bpifa3        | 0 NA | NA | NA | NA | NA |
| Bpifa5        | 0 NA | NA | NA | NA | NA |
| Bpifa6        | 0 NA | NA | NA | NA | NA |
| Bpifb2        | 0 NA | NA | NA | NA | NA |
| Bpifb3        | 0 NA | NA | NA | NA | NA |
| Bpifb4        | 0 NA | NA | NA | NA | NA |
| Bpifb5        | 0 NA | NA | NA | NA | NA |
| Bpifb9a       | 0 NA | NA | NA | NA | NA |
| Bpifb9b       | 0 NA | NA | NA | NA | NA |
| Brs3          | 0 NA | NA | NA | NA | NA |
| Bsnd          | 0 NA | NA | NA | NA | NA |
| Bsph1         | 0 NA | NA | NA | NA | NA |
| Bsph2         | 0 NA | NA | NA | NA | NA |
| Bsph2-ps      | 0 NA | NA | NA | NA | NA |
| Btbd35f10     | 0 NA | NA | NA | NA | NA |
| Btbd35f11     | 0 NA | NA | NA | NA | NA |
| Btbd35f12     | 0 NA | NA | NA | NA | NA |
| Btbd35f13     | 0 NA | NA | NA | NA | NA |
| Btbd35f14     | 0 NA | NA | NA | NA | NA |
| Btbd35f15     | 0 NA | NA | NA | NA | NA |
| Btbd35f16     | 0 NA | NA | NA | NA | NA |
| Btbd35f17     | 0 NA | NA | NA | NA | NA |

|               |      |    |    |    |    |
|---------------|------|----|----|----|----|
| Btbd35f18     | 0 NA | NA | NA | NA | NA |
| Btbd35f2      | 0 NA | NA | NA | NA | NA |
| Btbd35f20     | 0 NA | NA | NA | NA | NA |
| Btbd35f21     | 0 NA | NA | NA | NA | NA |
| Btbd35f23     | 0 NA | NA | NA | NA | NA |
| Btbd35f24     | 0 NA | NA | NA | NA | NA |
| Btbd35f27     | 0 NA | NA | NA | NA | NA |
| Btbd35f28     | 0 NA | NA | NA | NA | NA |
| Btbd35f29     | 0 NA | NA | NA | NA | NA |
| Btbd35f3      | 0 NA | NA | NA | NA | NA |
| Btbd35f4      | 0 NA | NA | NA | NA | NA |
| Btbd35f5      | 0 NA | NA | NA | NA | NA |
| Btbd35f6      | 0 NA | NA | NA | NA | NA |
| Btbd35f7      | 0 NA | NA | NA | NA | NA |
| Btg1b         | 0 NA | NA | NA | NA | NA |
| Btg1c         | 0 NA | NA | NA | NA | NA |
| Btg4          | 0 NA | NA | NA | NA | NA |
| Btn2a2        | 0 NA | NA | NA | NA | NA |
| BX936338.1    | 0 NA | NA | NA | NA | NA |
| C130032M10Rik | 0 NA | NA | NA | NA | NA |
| C130073F10Rik | 0 NA | NA | NA | NA | NA |
| C1ql2         | 0 NA | NA | NA | NA | NA |
| C2cd4a        | 0 NA | NA | NA | NA | NA |
| C530025M09Rik | 0 NA | NA | NA | NA | NA |
| C87114        | 0 NA | NA | NA | NA | NA |
| C87499        | 0 NA | NA | NA | NA | NA |
| C87977        | 0 NA | NA | NA | NA | NA |
| CAA01154301.1 | 0 NA | NA | NA | NA | NA |
| CAA01165726.1 | 0 NA | NA | NA | NA | NA |
| Cabs1         | 0 NA | NA | NA | NA | NA |
| Calb2         | 0 NA | NA | NA | NA | NA |
| Calcb         | 0 NA | NA | NA | NA | NA |
| Calcr         | 0 NA | NA | NA | NA | NA |
| Calhm1        | 0 NA | NA | NA | NA | NA |
| Calhm3        | 0 NA | NA | NA | NA | NA |
| Calm5         | 0 NA | NA | NA | NA | NA |
| Calml3        | 0 NA | NA | NA | NA | NA |
| Capza3        | 0 NA | NA | NA | NA | NA |
| Cartpt        | 0 NA | NA | NA | NA | NA |
| Catsper1      | 0 NA | NA | NA | NA | NA |
| Catspere1     | 0 NA | NA | NA | NA | NA |
| Cbfa2t2-ps1   | 0 NA | NA | NA | NA | NA |
| Cblif         | 0 NA | NA | NA | NA | NA |
| Cbln2         | 0 NA | NA | NA | NA | NA |
| Cbln4         | 0 NA | NA | NA | NA | NA |
| Cbx3-ps1      | 0 NA | NA | NA | NA | NA |
| Cbx3-ps2      | 0 NA | NA | NA | NA | NA |
| Cbx3-ps4      | 0 NA | NA | NA | NA | NA |
| Cbx3-ps5      | 0 NA | NA | NA | NA | NA |
| Cbx3-ps6      | 0 NA | NA | NA | NA | NA |
| Cbx3-ps7      | 0 NA | NA | NA | NA | NA |
| Ccdc105       | 0 NA | NA | NA | NA | NA |
| Ccdc110       | 0 NA | NA | NA | NA | NA |
| Ccdc121       | 0 NA | NA | NA | NA | NA |
| Ccdc172       | 0 NA | NA | NA | NA | NA |
| Ccdc175       | 0 NA | NA | NA | NA | NA |
| Ccdc178       | 0 NA | NA | NA | NA | NA |
| Ccdc182       | 0 NA | NA | NA | NA | NA |
| Ccdc185       | 0 NA | NA | NA | NA | NA |
| Ccdc188       | 0 NA | NA | NA | NA | NA |
| Ccdc192       | 0 NA | NA | NA | NA | NA |
| Ccdc54        | 0 NA | NA | NA | NA | NA |
| Ccdc70        | 0 NA | NA | NA | NA | NA |
| Ccdc7a        | 0 NA | NA | NA | NA | NA |
| Ccdc81        | 0 NA | NA | NA | NA | NA |
| Ccdc83        | 0 NA | NA | NA | NA | NA |

|            |      |    |    |    |    |
|------------|------|----|----|----|----|
| Ccer1      | 0 NA | NA | NA | NA | NA |
| Ccer2      | 0 NA | NA | NA | NA | NA |
| Cck        | 0 NA | NA | NA | NA | NA |
| Cckbr      | 0 NA | NA | NA | NA | NA |
| Ccl19-ps3  | 0 NA | NA | NA | NA | NA |
| Ccl26      | 0 NA | NA | NA | NA | NA |
| Ccl27b     | 0 NA | NA | NA | NA | NA |
| Cd209e     | 0 NA | NA | NA | NA | NA |
| Cd9-ps     | 0 NA | NA | NA | NA | NA |
| Cdc20b     | 0 NA | NA | NA | NA | NA |
| Cdh12      | 0 NA | NA | NA | NA | NA |
| Cdh7       | 0 NA | NA | NA | NA | NA |
| Cdh8       | 0 NA | NA | NA | NA | NA |
| Cdk5r2     | 0 NA | NA | NA | NA | NA |
| Cdr1       | 0 NA | NA | NA | NA | NA |
| Cdx1       | 0 NA | NA | NA | NA | NA |
| Cdx4       | 0 NA | NA | NA | NA | NA |
| Ceacam-ps1 | 0 NA | NA | NA | NA | NA |
| Ceacam10   | 0 NA | NA | NA | NA | NA |
| Ceacam11   | 0 NA | NA | NA | NA | NA |
| Ceacam13   | 0 NA | NA | NA | NA | NA |
| Ceacam14   | 0 NA | NA | NA | NA | NA |
| Ceacam15   | 0 NA | NA | NA | NA | NA |
| Ceacam5    | 0 NA | NA | NA | NA | NA |
| Ceacam9    | 0 NA | NA | NA | NA | NA |
| Cela3a     | 0 NA | NA | NA | NA | NA |
| Cetn1      | 0 NA | NA | NA | NA | NA |
| Cfap73     | 0 NA | NA | NA | NA | NA |
| Cfap97d1   | 0 NA | NA | NA | NA | NA |
| Cfc1       | 0 NA | NA | NA | NA | NA |
| Chil5      | 0 NA | NA | NA | NA | NA |
| Chodl      | 0 NA | NA | NA | NA | NA |
| Chrm5      | 0 NA | NA | NA | NA | NA |
| Chrna6     | 0 NA | NA | NA | NA | NA |
| Chrng      | 0 NA | NA | NA | NA | NA |
| Cib4       | 0 NA | NA | NA | NA | NA |
| Ckb-ps1    | 0 NA | NA | NA | NA | NA |
| Ckb-ps2    | 0 NA | NA | NA | NA | NA |
| Clca4c-ps  | 0 NA | NA | NA | NA | NA |
| Clcnkb     | 0 NA | NA | NA | NA | NA |
| Cldn13     | 0 NA | NA | NA | NA | NA |
| Cldn16     | 0 NA | NA | NA | NA | NA |
| Cldn17     | 0 NA | NA | NA | NA | NA |
| Cldn24     | 0 NA | NA | NA | NA | NA |
| Cldn25-ps  | 0 NA | NA | NA | NA | NA |
| Cldn34-ps  | 0 NA | NA | NA | NA | NA |
| Cldn34a    | 0 NA | NA | NA | NA | NA |
| Cldn34b1   | 0 NA | NA | NA | NA | NA |
| Cldn34b3   | 0 NA | NA | NA | NA | NA |
| Cldn34b4   | 0 NA | NA | NA | NA | NA |
| Cldn34c2   | 0 NA | NA | NA | NA | NA |
| Cldn34c4   | 0 NA | NA | NA | NA | NA |
| Cldn34d    | 0 NA | NA | NA | NA | NA |
| Clec2j     | 0 NA | NA | NA | NA | NA |
| Clec2m     | 0 NA | NA | NA | NA | NA |
| Clec3a     | 0 NA | NA | NA | NA | NA |
| Clec4b2    | 0 NA | NA | NA | NA | NA |
| Clpsl2     | 0 NA | NA | NA | NA | NA |
| Clrn2      | 0 NA | NA | NA | NA | NA |
| Cma2       | 0 NA | NA | NA | NA | NA |
| Cmtm1      | 0 NA | NA | NA | NA | NA |
| Cmtm2a     | 0 NA | NA | NA | NA | NA |
| Cmtm2b     | 0 NA | NA | NA | NA | NA |
| Cmtm5      | 0 NA | NA | NA | NA | NA |
| CN725425   | 0 NA | NA | NA | NA | NA |
| Cnbd1      | 0 NA | NA | NA | NA | NA |



|             |      |    |    |    |    |
|-------------|------|----|----|----|----|
| Cnfn        | 0 NA | NA | NA | NA | NA |
| Cntn5       | 0 NA | NA | NA | NA | NA |
| Cntnap3     | 0 NA | NA | NA | NA | NA |
| Cntnap5b    | 0 NA | NA | NA | NA | NA |
| Cntnap5c    | 0 NA | NA | NA | NA | NA |
| Cox20b      | 0 NA | NA | NA | NA | NA |
| Cox8c       | 0 NA | NA | NA | NA | NA |
| Cpa1        | 0 NA | NA | NA | NA | NA |
| Cpa5        | 0 NA | NA | NA | NA | NA |
| Cpxcr1      | 0 NA | NA | NA | NA | NA |
| CR974586.5  | 0 NA | NA | NA | NA | NA |
| Crb1-ps     | 0 NA | NA | NA | NA | NA |
| Crh         | 0 NA | NA | NA | NA | NA |
| Crhr1       | 0 NA | NA | NA | NA | NA |
| Crisp1      | 0 NA | NA | NA | NA | NA |
| Crisp4      | 0 NA | NA | NA | NA | NA |
| Crnn        | 0 NA | NA | NA | NA | NA |
| Crs-ps      | 0 NA | NA | NA | NA | NA |
| Crtac1      | 0 NA | NA | NA | NA | NA |
| Crybb2      | 0 NA | NA | NA | NA | NA |
| Cryga       | 0 NA | NA | NA | NA | NA |
| Crygb       | 0 NA | NA | NA | NA | NA |
| Crygc       | 0 NA | NA | NA | NA | NA |
| Crygd       | 0 NA | NA | NA | NA | NA |
| Cryge       | 0 NA | NA | NA | NA | NA |
| Crygf       | 0 NA | NA | NA | NA | NA |
| Csn1s2a     | 0 NA | NA | NA | NA | NA |
| Csn2        | 0 NA | NA | NA | NA | NA |
| Csnk2a1-ps  | 0 NA | NA | NA | NA | NA |
| Csnk2a1-ps1 | 0 NA | NA | NA | NA | NA |
| Csnka2ip    | 0 NA | NA | NA | NA | NA |
| Cst10       | 0 NA | NA | NA | NA | NA |
| Cst11       | 0 NA | NA | NA | NA | NA |
| Cst12       | 0 NA | NA | NA | NA | NA |
| Cst13       | 0 NA | NA | NA | NA | NA |
| Cst9        | 0 NA | NA | NA | NA | NA |
| Csta3       | 0 NA | NA | NA | NA | NA |
| Cstdc1      | 0 NA | NA | NA | NA | NA |
| Cstdc2      | 0 NA | NA | NA | NA | NA |
| Cstdc7      | 0 NA | NA | NA | NA | NA |
| Cstl1       | 0 NA | NA | NA | NA | NA |
| CT009635.4  | 0 NA | NA | NA | NA | NA |
| CT025680.1  | 0 NA | NA | NA | NA | NA |
| Ctag2       | 0 NA | NA | NA | NA | NA |
| Ctag2l1     | 0 NA | NA | NA | NA | NA |
| Ctag2l2     | 0 NA | NA | NA | NA | NA |
| Cts3        | 0 NA | NA | NA | NA | NA |
| Cts6        | 0 NA | NA | NA | NA | NA |
| Cts7        | 0 NA | NA | NA | NA | NA |
| Cts7-ps     | 0 NA | NA | NA | NA | NA |
| Ctsll3      | 0 NA | NA | NA | NA | NA |
| Ctsm        | 0 NA | NA | NA | NA | NA |
| Ctsm-ps2    | 0 NA | NA | NA | NA | NA |
| Ctsq        | 0 NA | NA | NA | NA | NA |
| Ctsr        | 0 NA | NA | NA | NA | NA |
| Ctxn2       | 0 NA | NA | NA | NA | NA |
| Ctxn3       | 0 NA | NA | NA | NA | NA |
| Cycs-ps3    | 0 NA | NA | NA | NA | NA |
| Cylc1       | 0 NA | NA | NA | NA | NA |
| Cylc2       | 0 NA | NA | NA | NA | NA |
| Cyp24a1     | 0 NA | NA | NA | NA | NA |
| Cyp2b26-ps  | 0 NA | NA | NA | NA | NA |
| Cyp2b27-ps  | 0 NA | NA | NA | NA | NA |
| Cyp2c73-ps  | 0 NA | NA | NA | NA | NA |
| Cyp2d33-ps  | 0 NA | NA | NA | NA | NA |
| Cyp2d39-ps  | 0 NA | NA | NA | NA | NA |

|               |   |    |    |    |    |    |
|---------------|---|----|----|----|----|----|
| Cyp2d67-ps    | 0 | NA | NA | NA | NA | NA |
| Cyp2j11       | 0 | NA | NA | NA | NA | NA |
| Cyp2j12       | 0 | NA | NA | NA | NA | NA |
| Cyp2j14-ps    | 0 | NA | NA | NA | NA | NA |
| Cyp2j15-ps    | 0 | NA | NA | NA | NA | NA |
| Cyp2j7        | 0 | NA | NA | NA | NA | NA |
| Cyp2j7-ps1    | 0 | NA | NA | NA | NA | NA |
| Cyp2j7-ps2    | 0 | NA | NA | NA | NA | NA |
| Cyp2j7-ps3    | 0 | NA | NA | NA | NA | NA |
| Cyp2t4        | 0 | NA | NA | NA | NA | NA |
| Cyp4a29-ps1   | 0 | NA | NA | NA | NA | NA |
| Cyp4a30-ps    | 0 | NA | NA | NA | NA | NA |
| Cyp4b1-ps1    | 0 | NA | NA | NA | NA | NA |
| Cyp4b1-ps2    | 0 | NA | NA | NA | NA | NA |
| Cypt1         | 0 | NA | NA | NA | NA | NA |
| Cypt12        | 0 | NA | NA | NA | NA | NA |
| Cypt14        | 0 | NA | NA | NA | NA | NA |
| Cypt15        | 0 | NA | NA | NA | NA | NA |
| Cypt2         | 0 | NA | NA | NA | NA | NA |
| Cypt3         | 0 | NA | NA | NA | NA | NA |
| Cypt4         | 0 | NA | NA | NA | NA | NA |
| D13Ertd608e   | 0 | NA | NA | NA | NA | NA |
| D5Ertd577e    | 0 | NA | NA | NA | NA | NA |
| D630044L22Rik | 0 | NA | NA | NA | NA | NA |
| Dbx1          | 0 | NA | NA | NA | NA | NA |
| Dcaf12l2      | 0 | NA | NA | NA | NA | NA |
| Dcaf8l        | 0 | NA | NA | NA | NA | NA |
| Dcpp2         | 0 | NA | NA | NA | NA | NA |
| Dcpp3         | 0 | NA | NA | NA | NA | NA |
| Defa-ps1      | 0 | NA | NA | NA | NA | NA |
| Defa-ps10     | 0 | NA | NA | NA | NA | NA |
| Defa-ps11     | 0 | NA | NA | NA | NA | NA |
| Defa-ps12     | 0 | NA | NA | NA | NA | NA |
| Defa-ps13     | 0 | NA | NA | NA | NA | NA |
| Defa-ps14     | 0 | NA | NA | NA | NA | NA |
| Defa-ps15     | 0 | NA | NA | NA | NA | NA |
| Defa-ps16     | 0 | NA | NA | NA | NA | NA |
| Defa-ps17     | 0 | NA | NA | NA | NA | NA |
| Defa-ps18     | 0 | NA | NA | NA | NA | NA |
| Defa-ps3      | 0 | NA | NA | NA | NA | NA |
| Defa-ps4      | 0 | NA | NA | NA | NA | NA |
| Defa-ps5      | 0 | NA | NA | NA | NA | NA |
| Defa-ps6      | 0 | NA | NA | NA | NA | NA |
| Defa-ps7      | 0 | NA | NA | NA | NA | NA |
| Defa-ps8      | 0 | NA | NA | NA | NA | NA |
| Defa-ps9      | 0 | NA | NA | NA | NA | NA |
| Defa2         | 0 | NA | NA | NA | NA | NA |
| Defa20        | 0 | NA | NA | NA | NA | NA |
| Defa21        | 0 | NA | NA | NA | NA | NA |
| Defa22        | 0 | NA | NA | NA | NA | NA |
| Defa23        | 0 | NA | NA | NA | NA | NA |
| Defa25        | 0 | NA | NA | NA | NA | NA |
| Defa26        | 0 | NA | NA | NA | NA | NA |
| Defa27        | 0 | NA | NA | NA | NA | NA |
| Defa28        | 0 | NA | NA | NA | NA | NA |
| Defa29        | 0 | NA | NA | NA | NA | NA |
| Defa3         | 0 | NA | NA | NA | NA | NA |
| Defa30        | 0 | NA | NA | NA | NA | NA |
| Defa32        | 0 | NA | NA | NA | NA | NA |
| Defa33        | 0 | NA | NA | NA | NA | NA |
| Defa34        | 0 | NA | NA | NA | NA | NA |
| Defa35        | 0 | NA | NA | NA | NA | NA |
| Defa39        | 0 | NA | NA | NA | NA | NA |
| Defa40        | 0 | NA | NA | NA | NA | NA |
| Defa41        | 0 | NA | NA | NA | NA | NA |
| Defa43        | 0 | NA | NA | NA | NA | NA |

|            |      |    |    |    |    |
|------------|------|----|----|----|----|
| Defa5      | 0 NA | NA | NA | NA | NA |
| Defb10     | 0 NA | NA | NA | NA | NA |
| Defb11     | 0 NA | NA | NA | NA | NA |
| Defb12     | 0 NA | NA | NA | NA | NA |
| Defb13     | 0 NA | NA | NA | NA | NA |
| Defb14     | 0 NA | NA | NA | NA | NA |
| Defb15     | 0 NA | NA | NA | NA | NA |
| Defb18     | 0 NA | NA | NA | NA | NA |
| Defb19     | 0 NA | NA | NA | NA | NA |
| Defb2      | 0 NA | NA | NA | NA | NA |
| Defb20     | 0 NA | NA | NA | NA | NA |
| Defb21     | 0 NA | NA | NA | NA | NA |
| Defb22     | 0 NA | NA | NA | NA | NA |
| Defb23     | 0 NA | NA | NA | NA | NA |
| Defb26     | 0 NA | NA | NA | NA | NA |
| Defb28     | 0 NA | NA | NA | NA | NA |
| Defb29     | 0 NA | NA | NA | NA | NA |
| Defb3      | 0 NA | NA | NA | NA | NA |
| Defb30     | 0 NA | NA | NA | NA | NA |
| Defb33     | 0 NA | NA | NA | NA | NA |
| Defb34     | 0 NA | NA | NA | NA | NA |
| Defb35     | 0 NA | NA | NA | NA | NA |
| Defb37     | 0 NA | NA | NA | NA | NA |
| Defb38     | 0 NA | NA | NA | NA | NA |
| Defb39     | 0 NA | NA | NA | NA | NA |
| Defb4      | 0 NA | NA | NA | NA | NA |
| Defb40     | 0 NA | NA | NA | NA | NA |
| Defb41     | 0 NA | NA | NA | NA | NA |
| Defb43     | 0 NA | NA | NA | NA | NA |
| Defb44-ps  | 0 NA | NA | NA | NA | NA |
| Defb45     | 0 NA | NA | NA | NA | NA |
| Defb46     | 0 NA | NA | NA | NA | NA |
| Defb48     | 0 NA | NA | NA | NA | NA |
| Defb5      | 0 NA | NA | NA | NA | NA |
| Defb50     | 0 NA | NA | NA | NA | NA |
| Defb6      | 0 NA | NA | NA | NA | NA |
| Defb7      | 0 NA | NA | NA | NA | NA |
| Defb8      | 0 NA | NA | NA | NA | NA |
| Defb9      | 0 NA | NA | NA | NA | NA |
| Dgkk       | 0 NA | NA | NA | NA | NA |
| Dhrs2      | 0 NA | NA | NA | NA | NA |
| Diras1     | 0 NA | NA | NA | NA | NA |
| Dlgap2     | 0 NA | NA | NA | NA | NA |
| Dlx3       | 0 NA | NA | NA | NA | NA |
| Dmrt3      | 0 NA | NA | NA | NA | NA |
| Dmrtb1     | 0 NA | NA | NA | NA | NA |
| Dmrtc1a    | 0 NA | NA | NA | NA | NA |
| Dmrtc1b    | 0 NA | NA | NA | NA | NA |
| Dmrtc1c1   | 0 NA | NA | NA | NA | NA |
| Dmrtc1c2   | 0 NA | NA | NA | NA | NA |
| Dmrtc2     | 0 NA | NA | NA | NA | NA |
| Dnah7a     | 0 NA | NA | NA | NA | NA |
| Dnaja1-ps  | 0 NA | NA | NA | NA | NA |
| Dnajib8    | 0 NA | NA | NA | NA | NA |
| Dnajc5b    | 0 NA | NA | NA | NA | NA |
| Dnajc5g    | 0 NA | NA | NA | NA | NA |
| Dnd1-ps    | 0 NA | NA | NA | NA | NA |
| Dnmt3a-ps1 | 0 NA | NA | NA | NA | NA |
| Dnmt3l-ps1 | 0 NA | NA | NA | NA | NA |
| Doc2a      | 0 NA | NA | NA | NA | NA |
| Doxl1      | 0 NA | NA | NA | NA | NA |
| Doxl2      | 0 NA | NA | NA | NA | NA |
| Dph3b-ps   | 0 NA | NA | NA | NA | NA |
| Dppa1      | 0 NA | NA | NA | NA | NA |
| Dppa3-ps   | 0 NA | NA | NA | NA | NA |
| Drd2       | 0 NA | NA | NA | NA | NA |

|               |      |    |    |    |    |
|---------------|------|----|----|----|----|
| Drd4          | 0 NA | NA | NA | NA | NA |
| Drd5          | 0 NA | NA | NA | NA | NA |
| Dspp          | 0 NA | NA | NA | NA | NA |
| Duoxa1        | 0 NA | NA | NA | NA | NA |
| Dusp21        | 0 NA | NA | NA | NA | NA |
| Dydc1         | 0 NA | NA | NA | NA | NA |
| Dydc2         | 0 NA | NA | NA | NA | NA |
| Dynap         | 0 NA | NA | NA | NA | NA |
| E030025P04Rik | 0 NA | NA | NA | NA | NA |
| E130116L18Rik | 0 NA | NA | NA | NA | NA |
| E130201H02Rik | 0 NA | NA | NA | NA | NA |
| E130218I03Rik | 0 NA | NA | NA | NA | NA |
| E330014E10Rik | 0 NA | NA | NA | NA | NA |
| Ear-ps1       | 0 NA | NA | NA | NA | NA |
| Ear-ps10      | 0 NA | NA | NA | NA | NA |
| Ear-ps12      | 0 NA | NA | NA | NA | NA |
| Ear-ps2       | 0 NA | NA | NA | NA | NA |
| Ear-ps3       | 0 NA | NA | NA | NA | NA |
| Ear-ps4       | 0 NA | NA | NA | NA | NA |
| Ear-ps5       | 0 NA | NA | NA | NA | NA |
| Ear-ps7       | 0 NA | NA | NA | NA | NA |
| Ear-ps8       | 0 NA | NA | NA | NA | NA |
| Ear-ps9       | 0 NA | NA | NA | NA | NA |
| Ear1          | 0 NA | NA | NA | NA | NA |
| Ear10         | 0 NA | NA | NA | NA | NA |
| Ear14         | 0 NA | NA | NA | NA | NA |
| Ear6          | 0 NA | NA | NA | NA | NA |
| Ecel1         | 0 NA | NA | NA | NA | NA |
| Eddm3b        | 0 NA | NA | NA | NA | NA |
| Edn2          | 0 NA | NA | NA | NA | NA |
| Efcab1        | 0 NA | NA | NA | NA | NA |
| Efcab10       | 0 NA | NA | NA | NA | NA |
| Efcab6        | 0 NA | NA | NA | NA | NA |
| Egr4          | 0 NA | NA | NA | NA | NA |
| Eif1-ps3      | 0 NA | NA | NA | NA | NA |
| Elavl4        | 0 NA | NA | NA | NA | NA |
| Emilin3       | 0 NA | NA | NA | NA | NA |
| Emx1          | 0 NA | NA | NA | NA | NA |
| Emx2          | 0 NA | NA | NA | NA | NA |
| Enam          | 0 NA | NA | NA | NA | NA |
| Enpp7         | 0 NA | NA | NA | NA | NA |
| Epha6         | 0 NA | NA | NA | NA | NA |
| Epp13         | 0 NA | NA | NA | NA | NA |
| Eppin         | 0 NA | NA | NA | NA | NA |
| Epx           | 0 NA | NA | NA | NA | NA |
| Erich6b       | 0 NA | NA | NA | NA | NA |
| Ernm          | 0 NA | NA | NA | NA | NA |
| Ern2          | 0 NA | NA | NA | NA | NA |
| Esd-ps        | 0 NA | NA | NA | NA | NA |
| Esp1          | 0 NA | NA | NA | NA | NA |
| Esp15         | 0 NA | NA | NA | NA | NA |
| Esp16         | 0 NA | NA | NA | NA | NA |
| Esp18         | 0 NA | NA | NA | NA | NA |
| Esp23         | 0 NA | NA | NA | NA | NA |
| Esp24         | 0 NA | NA | NA | NA | NA |
| Esp3          | 0 NA | NA | NA | NA | NA |
| Esp31         | 0 NA | NA | NA | NA | NA |
| Esp34         | 0 NA | NA | NA | NA | NA |
| Esp36         | 0 NA | NA | NA | NA | NA |
| Esp38         | 0 NA | NA | NA | NA | NA |
| Esp4          | 0 NA | NA | NA | NA | NA |
| Esp8          | 0 NA | NA | NA | NA | NA |
| Esx1          | 0 NA | NA | NA | NA | NA |
| Etd           | 0 NA | NA | NA | NA | NA |
| Etv2          | 0 NA | NA | NA | NA | NA |
| Evx1          | 0 NA | NA | NA | NA | NA |

|            |      |    |    |    |    |
|------------|------|----|----|----|----|
| Exosc6     | 0 NA | NA | NA | NA | NA |
| Fabp5l2    | 0 NA | NA | NA | NA | NA |
| Fads2b     | 0 NA | NA | NA | NA | NA |
| Fam122c    | 0 NA | NA | NA | NA | NA |
| Fam136b-ps | 0 NA | NA | NA | NA | NA |
| Fam155a    | 0 NA | NA | NA | NA | NA |
| Fam162b    | 0 NA | NA | NA | NA | NA |
| Fam170a    | 0 NA | NA | NA | NA | NA |
| Fam181a    | 0 NA | NA | NA | NA | NA |
| Fam187a    | 0 NA | NA | NA | NA | NA |
| Fam205a1   | 0 NA | NA | NA | NA | NA |
| Fam205c    | 0 NA | NA | NA | NA | NA |
| Fam227b    | 0 NA | NA | NA | NA | NA |
| Fam240a    | 0 NA | NA | NA | NA | NA |
| Fam240b    | 0 NA | NA | NA | NA | NA |
| Fam24a     | 0 NA | NA | NA | NA | NA |
| Fam47c     | 0 NA | NA | NA | NA | NA |
| Fam71a     | 0 NA | NA | NA | NA | NA |
| Fam90a1a   | 0 NA | NA | NA | NA | NA |
| Fam92b     | 0 NA | NA | NA | NA | NA |
| Fat2       | 0 NA | NA | NA | NA | NA |
| Fate1      | 0 NA | NA | NA | NA | NA |
| Fau-ps1    | 0 NA | NA | NA | NA | NA |
| Fbl1l      | 0 NA | NA | NA | NA | NA |
| Fbxw16     | 0 NA | NA | NA | NA | NA |
| Fbxw21     | 0 NA | NA | NA | NA | NA |
| Fbxw22     | 0 NA | NA | NA | NA | NA |
| Ferd3l     | 0 NA | NA | NA | NA | NA |
| Fezf1      | 0 NA | NA | NA | NA | NA |
| Fezf2      | 0 NA | NA | NA | NA | NA |
| Fgf14      | 0 NA | NA | NA | NA | NA |
| Fgf3       | 0 NA | NA | NA | NA | NA |
| Fgfr3-ps   | 0 NA | NA | NA | NA | NA |
| Fhl5       | 0 NA | NA | NA | NA | NA |
| Figla      | 0 NA | NA | NA | NA | NA |
| Fkbp1a-ps2 | 0 NA | NA | NA | NA | NA |
| Fmo9       | 0 NA | NA | NA | NA | NA |
| Fndc9      | 0 NA | NA | NA | NA | NA |
| FO082317.1 | 0 NA | NA | NA | NA | NA |
| FO082317.2 | 0 NA | NA | NA | NA | NA |
| Foxb2      | 0 NA | NA | NA | NA | NA |
| Foxd1      | 0 NA | NA | NA | NA | NA |
| Foxe3      | 0 NA | NA | NA | NA | NA |
| Foxi1      | 0 NA | NA | NA | NA | NA |
| Foxi2      | 0 NA | NA | NA | NA | NA |
| Foxi3      | 0 NA | NA | NA | NA | NA |
| Foxl2      | 0 NA | NA | NA | NA | NA |
| Fpr-rs3    | 0 NA | NA | NA | NA | NA |
| Fpr-rs4    | 0 NA | NA | NA | NA | NA |
| Fpr-rs6    | 0 NA | NA | NA | NA | NA |
| Fpr-rs7    | 0 NA | NA | NA | NA | NA |
| Fpr3       | 0 NA | NA | NA | NA | NA |
| Frem3      | 0 NA | NA | NA | NA | NA |
| Frg2f4     | 0 NA | NA | NA | NA | NA |
| Frmf7      | 0 NA | NA | NA | NA | NA |
| Frmf2      | 0 NA | NA | NA | NA | NA |
| Fscb       | 0 NA | NA | NA | NA | NA |
| Fscn3      | 0 NA | NA | NA | NA | NA |
| Fshb       | 0 NA | NA | NA | NA | NA |
| Fshr       | 0 NA | NA | NA | NA | NA |
| Fsip2      | 0 NA | NA | NA | NA | NA |
| Fsip2l     | 0 NA | NA | NA | NA | NA |
| Ftdc       | 0 NA | NA | NA | NA | NA |
| Fth-ps3    | 0 NA | NA | NA | NA | NA |
| Fthl17-ps1 | 0 NA | NA | NA | NA | NA |
| Fthl17-ps2 | 0 NA | NA | NA | NA | NA |



|            |      |    |    |    |    |
|------------|------|----|----|----|----|
| Fthl17-ps3 | 0 NA | NA | NA | NA | NA |
| Fthl17a    | 0 NA | NA | NA | NA | NA |
| Fthl17b    | 0 NA | NA | NA | NA | NA |
| Fthl17c    | 0 NA | NA | NA | NA | NA |
| Fthl17d    | 0 NA | NA | NA | NA | NA |
| Fthl17e    | 0 NA | NA | NA | NA | NA |
| Fthl17f    | 0 NA | NA | NA | NA | NA |
| Ftmt       | 0 NA | NA | NA | NA | NA |
| G6pd2      | 0 NA | NA | NA | NA | NA |
| Gabra1     | 0 NA | NA | NA | NA | NA |
| Gabra6     | 0 NA | NA | NA | NA | NA |
| Gabrg2     | 0 NA | NA | NA | NA | NA |
| Gabbr1     | 0 NA | NA | NA | NA | NA |
| Galnt15    | 0 NA | NA | NA | NA | NA |
| Galp       | 0 NA | NA | NA | NA | NA |
| Galr1      | 0 NA | NA | NA | NA | NA |
| Gas2l2     | 0 NA | NA | NA | NA | NA |
| Gast       | 0 NA | NA | NA | NA | NA |
| Gbx1       | 0 NA | NA | NA | NA | NA |
| Gcg        | 0 NA | NA | NA | NA | NA |
| Gcnt7      | 0 NA | NA | NA | NA | NA |
| Gdf5       | 0 NA | NA | NA | NA | NA |
| Gdpd4      | 0 NA | NA | NA | NA | NA |
| Gemin6-ps  | 0 NA | NA | NA | NA | NA |
| Gfral      | 0 NA | NA | NA | NA | NA |
| Gfy        | 0 NA | NA | NA | NA | NA |
| Ghsr       | 0 NA | NA | NA | NA | NA |
| Gja3       | 0 NA | NA | NA | NA | NA |
| Gjb6       | 0 NA | NA | NA | NA | NA |
| Gjd3       | 0 NA | NA | NA | NA | NA |
| Gk2        | 0 NA | NA | NA | NA | NA |
| Gkn2       | 0 NA | NA | NA | NA | NA |
| Glb1l3     | 0 NA | NA | NA | NA | NA |
| Glipr11    | 0 NA | NA | NA | NA | NA |
| Glipr12    | 0 NA | NA | NA | NA | NA |
| Glipr13    | 0 NA | NA | NA | NA | NA |
| Glns-ps1   | 0 NA | NA | NA | NA | NA |
| Glr1       | 0 NA | NA | NA | NA | NA |
| Glr4       | 0 NA | NA | NA | NA | NA |
| Glyat13    | 0 NA | NA | NA | NA | NA |
| Glycam1    | 0 NA | NA | NA | NA | NA |
| Gm10013    | 0 NA | NA | NA | NA | NA |
| Gm10015    | 0 NA | NA | NA | NA | NA |
| Gm10024    | 0 NA | NA | NA | NA | NA |
| Gm10029    | 0 NA | NA | NA | NA | NA |
| Gm10042    | 0 NA | NA | NA | NA | NA |
| Gm10043    | 0 NA | NA | NA | NA | NA |
| Gm10046    | 0 NA | NA | NA | NA | NA |
| Gm10052    | 0 NA | NA | NA | NA | NA |
| Gm10058    | 0 NA | NA | NA | NA | NA |
| Gm10059    | 0 NA | NA | NA | NA | NA |
| Gm10061    | 0 NA | NA | NA | NA | NA |
| Gm10064    | 0 NA | NA | NA | NA | NA |
| Gm10074    | 0 NA | NA | NA | NA | NA |
| Gm10086    | 0 NA | NA | NA | NA | NA |
| Gm10087    | 0 NA | NA | NA | NA | NA |
| Gm10088    | 0 NA | NA | NA | NA | NA |
| Gm10092    | 0 NA | NA | NA | NA | NA |
| Gm10095    | 0 NA | NA | NA | NA | NA |
| Gm10096    | 0 NA | NA | NA | NA | NA |
| Gm10100    | 0 NA | NA | NA | NA | NA |
| Gm10105    | 0 NA | NA | NA | NA | NA |
| Gm10109    | 0 NA | NA | NA | NA | NA |
| Gm10112    | 0 NA | NA | NA | NA | NA |
| Gm10120    | 0 NA | NA | NA | NA | NA |
| Gm10128    | 0 NA | NA | NA | NA | NA |

|         |      |    |    |    |    |
|---------|------|----|----|----|----|
| Gm10135 | 0 NA | NA | NA | NA | NA |
| Gm10142 | 0 NA | NA | NA | NA | NA |
| Gm10145 | 0 NA | NA | NA | NA | NA |
| Gm10147 | 0 NA | NA | NA | NA | NA |
| Gm10153 | 0 NA | NA | NA | NA | NA |
| Gm10156 | 0 NA | NA | NA | NA | NA |
| Gm10171 | 0 NA | NA | NA | NA | NA |
| Gm10179 | 0 NA | NA | NA | NA | NA |
| Gm10180 | 0 NA | NA | NA | NA | NA |
| Gm10188 | 0 NA | NA | NA | NA | NA |
| Gm10193 | 0 NA | NA | NA | NA | NA |
| Gm10198 | 0 NA | NA | NA | NA | NA |
| Gm10205 | 0 NA | NA | NA | NA | NA |
| Gm10220 | 0 NA | NA | NA | NA | NA |
| Gm10222 | 0 NA | NA | NA | NA | NA |
| Gm10228 | 0 NA | NA | NA | NA | NA |
| Gm10229 | 0 NA | NA | NA | NA | NA |
| Gm10230 | 0 NA | NA | NA | NA | NA |
| Gm10231 | 0 NA | NA | NA | NA | NA |
| Gm10233 | 0 NA | NA | NA | NA | NA |
| Gm10234 | 0 NA | NA | NA | NA | NA |
| Gm10238 | 0 NA | NA | NA | NA | NA |
| Gm10240 | 0 NA | NA | NA | NA | NA |
| Gm10242 | 0 NA | NA | NA | NA | NA |
| Gm10254 | 0 NA | NA | NA | NA | NA |
| Gm10256 | 0 NA | NA | NA | NA | NA |
| Gm10259 | 0 NA | NA | NA | NA | NA |
| Gm10263 | 0 NA | NA | NA | NA | NA |
| Gm10264 | 0 NA | NA | NA | NA | NA |
| Gm10267 | 0 NA | NA | NA | NA | NA |
| Gm10268 | 0 NA | NA | NA | NA | NA |
| Gm10272 | 0 NA | NA | NA | NA | NA |
| Gm10283 | 0 NA | NA | NA | NA | NA |
| Gm10292 | 0 NA | NA | NA | NA | NA |
| Gm10298 | 0 NA | NA | NA | NA | NA |
| Gm10308 | 0 NA | NA | NA | NA | NA |
| Gm10312 | 0 NA | NA | NA | NA | NA |
| Gm10313 | 0 NA | NA | NA | NA | NA |
| Gm10318 | 0 NA | NA | NA | NA | NA |
| Gm10320 | 0 NA | NA | NA | NA | NA |
| Gm10322 | 0 NA | NA | NA | NA | NA |
| Gm10323 | 0 NA | NA | NA | NA | NA |
| Gm10334 | 0 NA | NA | NA | NA | NA |
| Gm10337 | 0 NA | NA | NA | NA | NA |
| Gm10338 | 0 NA | NA | NA | NA | NA |
| Gm10343 | 0 NA | NA | NA | NA | NA |
| Gm10354 | 0 NA | NA | NA | NA | NA |
| Gm10355 | 0 NA | NA | NA | NA | NA |
| Gm10356 | 0 NA | NA | NA | NA | NA |
| Gm10358 | 0 NA | NA | NA | NA | NA |
| Gm10360 | 0 NA | NA | NA | NA | NA |
| Gm10375 | 0 NA | NA | NA | NA | NA |
| Gm10376 | 0 NA | NA | NA | NA | NA |
| Gm10377 | 0 NA | NA | NA | NA | NA |
| Gm10378 | 0 NA | NA | NA | NA | NA |
| Gm10410 | 0 NA | NA | NA | NA | NA |
| Gm10413 | 0 NA | NA | NA | NA | NA |
| Gm10428 | 0 NA | NA | NA | NA | NA |
| Gm10436 | 0 NA | NA | NA | NA | NA |
| Gm10439 | 0 NA | NA | NA | NA | NA |
| Gm10444 | 0 NA | NA | NA | NA | NA |
| Gm10471 | 0 NA | NA | NA | NA | NA |
| Gm10477 | 0 NA | NA | NA | NA | NA |
| Gm10486 | 0 NA | NA | NA | NA | NA |
| Gm10487 | 0 NA | NA | NA | NA | NA |
| Gm10488 | 0 NA | NA | NA | NA | NA |

|         |      |    |    |    |    |
|---------|------|----|----|----|----|
| Gm10491 | 0 NA | NA | NA | NA | NA |
| Gm10493 | 0 NA | NA | NA | NA | NA |
| Gm10518 | 0 NA | NA | NA | NA | NA |
| Gm10540 | 0 NA | NA | NA | NA | NA |
| Gm10542 | 0 NA | NA | NA | NA | NA |
| Gm10553 | 0 NA | NA | NA | NA | NA |
| Gm10577 | 0 NA | NA | NA | NA | NA |
| Gm10580 | 0 NA | NA | NA | NA | NA |
| Gm10581 | 0 NA | NA | NA | NA | NA |
| Gm10582 | 0 NA | NA | NA | NA | NA |
| Gm10583 | 0 NA | NA | NA | NA | NA |
| Gm10620 | 0 NA | NA | NA | NA | NA |
| Gm10663 | 0 NA | NA | NA | NA | NA |
| Gm10665 | 0 NA | NA | NA | NA | NA |
| Gm10670 | 0 NA | NA | NA | NA | NA |
| Gm10698 | 0 NA | NA | NA | NA | NA |
| Gm10715 | 0 NA | NA | NA | NA | NA |
| Gm10717 | 0 NA | NA | NA | NA | NA |
| Gm10718 | 0 NA | NA | NA | NA | NA |
| Gm10720 | 0 NA | NA | NA | NA | NA |
| Gm10721 | 0 NA | NA | NA | NA | NA |
| Gm10736 | 0 NA | NA | NA | NA | NA |
| Gm10769 | 0 NA | NA | NA | NA | NA |
| Gm10770 | 0 NA | NA | NA | NA | NA |
| Gm10772 | 0 NA | NA | NA | NA | NA |
| Gm10774 | 0 NA | NA | NA | NA | NA |
| Gm10780 | 0 NA | NA | NA | NA | NA |
| Gm10784 | 0 NA | NA | NA | NA | NA |
| Gm10794 | 0 NA | NA | NA | NA | NA |
| Gm10799 | 0 NA | NA | NA | NA | NA |
| Gm10801 | 0 NA | NA | NA | NA | NA |
| Gm10805 | 0 NA | NA | NA | NA | NA |
| Gm10807 | 0 NA | NA | NA | NA | NA |
| Gm10813 | 0 NA | NA | NA | NA | NA |
| Gm10837 | 0 NA | NA | NA | NA | NA |
| Gm10849 | 0 NA | NA | NA | NA | NA |
| Gm10913 | 0 NA | NA | NA | NA | NA |
| Gm10923 | 0 NA | NA | NA | NA | NA |
| Gm10931 | 0 NA | NA | NA | NA | NA |
| Gm10936 | 0 NA | NA | NA | NA | NA |
| Gm10944 | 0 NA | NA | NA | NA | NA |
| Gm10945 | 0 NA | NA | NA | NA | NA |
| Gm10959 | 0 NA | NA | NA | NA | NA |
| Gm10964 | 0 NA | NA | NA | NA | NA |
| Gm10988 | 0 NA | NA | NA | NA | NA |
| Gm10999 | 0 NA | NA | NA | NA | NA |
| Gm11009 | 0 NA | NA | NA | NA | NA |
| Gm11020 | 0 NA | NA | NA | NA | NA |
| Gm11025 | 0 NA | NA | NA | NA | NA |
| Gm11037 | 0 NA | NA | NA | NA | NA |
| Gm11060 | 0 NA | NA | NA | NA | NA |
| Gm11065 | 0 NA | NA | NA | NA | NA |
| Gm11077 | 0 NA | NA | NA | NA | NA |
| Gm11096 | 0 NA | NA | NA | NA | NA |
| Gm11099 | 0 NA | NA | NA | NA | NA |
| Gm11105 | 0 NA | NA | NA | NA | NA |
| Gm11107 | 0 NA | NA | NA | NA | NA |
| Gm11109 | 0 NA | NA | NA | NA | NA |
| Gm11111 | 0 NA | NA | NA | NA | NA |
| Gm11114 | 0 NA | NA | NA | NA | NA |
| Gm11115 | 0 NA | NA | NA | NA | NA |
| Gm11116 | 0 NA | NA | NA | NA | NA |
| Gm1113  | 0 NA | NA | NA | NA | NA |
| Gm11146 | 0 NA | NA | NA | NA | NA |
| Gm11172 | 0 NA | NA | NA | NA | NA |
| Gm11189 | 0 NA | NA | NA | NA | NA |

|         |      |    |    |    |    |
|---------|------|----|----|----|----|
| Gm11197 | 0 NA | NA | NA | NA | NA |
| Gm11198 | 0 NA | NA | NA | NA | NA |
| Gm11199 | 0 NA | NA | NA | NA | NA |
| Gm11200 | 0 NA | NA | NA | NA | NA |
| Gm11203 | 0 NA | NA | NA | NA | NA |
| Gm11207 | 0 NA | NA | NA | NA | NA |
| Gm11213 | 0 NA | NA | NA | NA | NA |
| Gm11218 | 0 NA | NA | NA | NA | NA |
| Gm11219 | 0 NA | NA | NA | NA | NA |
| Gm11220 | 0 NA | NA | NA | NA | NA |
| Gm11221 | 0 NA | NA | NA | NA | NA |
| Gm11222 | 0 NA | NA | NA | NA | NA |
| Gm11223 | 0 NA | NA | NA | NA | NA |
| Gm11227 | 0 NA | NA | NA | NA | NA |
| Gm11229 | 0 NA | NA | NA | NA | NA |
| Gm11232 | 0 NA | NA | NA | NA | NA |
| Gm11233 | 0 NA | NA | NA | NA | NA |
| Gm11235 | 0 NA | NA | NA | NA | NA |
| Gm11236 | 0 NA | NA | NA | NA | NA |
| Gm11237 | 0 NA | NA | NA | NA | NA |
| Gm11238 | 0 NA | NA | NA | NA | NA |
| Gm11241 | 0 NA | NA | NA | NA | NA |
| Gm11242 | 0 NA | NA | NA | NA | NA |
| Gm11243 | 0 NA | NA | NA | NA | NA |
| Gm11244 | 0 NA | NA | NA | NA | NA |
| Gm11245 | 0 NA | NA | NA | NA | NA |
| Gm11246 | 0 NA | NA | NA | NA | NA |
| Gm11248 | 0 NA | NA | NA | NA | NA |
| Gm11251 | 0 NA | NA | NA | NA | NA |
| Gm11252 | 0 NA | NA | NA | NA | NA |
| Gm11254 | 0 NA | NA | NA | NA | NA |
| Gm11255 | 0 NA | NA | NA | NA | NA |
| Gm11256 | 0 NA | NA | NA | NA | NA |
| Gm11257 | 0 NA | NA | NA | NA | NA |
| Gm11259 | 0 NA | NA | NA | NA | NA |
| Gm11260 | 0 NA | NA | NA | NA | NA |
| Gm11262 | 0 NA | NA | NA | NA | NA |
| Gm11268 | 0 NA | NA | NA | NA | NA |
| Gm11270 | 0 NA | NA | NA | NA | NA |
| Gm11271 | 0 NA | NA | NA | NA | NA |
| Gm11278 | 0 NA | NA | NA | NA | NA |
| Gm11279 | 0 NA | NA | NA | NA | NA |
| Gm11282 | 0 NA | NA | NA | NA | NA |
| Gm11284 | 0 NA | NA | NA | NA | NA |
| Gm11285 | 0 NA | NA | NA | NA | NA |
| Gm11295 | 0 NA | NA | NA | NA | NA |
| Gm11298 | 0 NA | NA | NA | NA | NA |
| Gm11307 | 0 NA | NA | NA | NA | NA |
| Gm11313 | 0 NA | NA | NA | NA | NA |
| Gm11318 | 0 NA | NA | NA | NA | NA |
| Gm11320 | 0 NA | NA | NA | NA | NA |
| Gm11321 | 0 NA | NA | NA | NA | NA |
| Gm11322 | 0 NA | NA | NA | NA | NA |
| Gm11325 | 0 NA | NA | NA | NA | NA |
| Gm11333 | 0 NA | NA | NA | NA | NA |
| Gm11334 | 0 NA | NA | NA | NA | NA |
| Gm11341 | 0 NA | NA | NA | NA | NA |
| Gm11348 | 0 NA | NA | NA | NA | NA |
| Gm11349 | 0 NA | NA | NA | NA | NA |
| Gm11350 | 0 NA | NA | NA | NA | NA |
| Gm11352 | 0 NA | NA | NA | NA | NA |
| Gm11354 | 0 NA | NA | NA | NA | NA |
| Gm11355 | 0 NA | NA | NA | NA | NA |
| Gm11356 | 0 NA | NA | NA | NA | NA |
| Gm11357 | 0 NA | NA | NA | NA | NA |
| Gm11358 | 0 NA | NA | NA | NA | NA |

|         |      |    |    |    |    |
|---------|------|----|----|----|----|
| Gm11359 | 0 NA | NA | NA | NA | NA |
| Gm11360 | 0 NA | NA | NA | NA | NA |
| Gm11366 | 0 NA | NA | NA | NA | NA |
| Gm11367 | 0 NA | NA | NA | NA | NA |
| Gm11369 | 0 NA | NA | NA | NA | NA |
| Gm11370 | 0 NA | NA | NA | NA | NA |
| Gm11371 | 0 NA | NA | NA | NA | NA |
| Gm11372 | 0 NA | NA | NA | NA | NA |
| Gm11380 | 0 NA | NA | NA | NA | NA |
| Gm11382 | 0 NA | NA | NA | NA | NA |
| Gm11383 | 0 NA | NA | NA | NA | NA |
| Gm11384 | 0 NA | NA | NA | NA | NA |
| Gm11385 | 0 NA | NA | NA | NA | NA |
| Gm11386 | 0 NA | NA | NA | NA | NA |
| Gm11387 | 0 NA | NA | NA | NA | NA |
| Gm11388 | 0 NA | NA | NA | NA | NA |
| Gm11392 | 0 NA | NA | NA | NA | NA |
| Gm11393 | 0 NA | NA | NA | NA | NA |
| Gm11394 | 0 NA | NA | NA | NA | NA |
| Gm11395 | 0 NA | NA | NA | NA | NA |
| Gm11398 | 0 NA | NA | NA | NA | NA |
| Gm1140  | 0 NA | NA | NA | NA | NA |
| Gm11401 | 0 NA | NA | NA | NA | NA |
| Gm11403 | 0 NA | NA | NA | NA | NA |
| Gm11404 | 0 NA | NA | NA | NA | NA |
| Gm11406 | 0 NA | NA | NA | NA | NA |
| Gm11407 | 0 NA | NA | NA | NA | NA |
| Gm11408 | 0 NA | NA | NA | NA | NA |
| Gm11409 | 0 NA | NA | NA | NA | NA |
| Gm11411 | 0 NA | NA | NA | NA | NA |
| Gm11414 | 0 NA | NA | NA | NA | NA |
| Gm11416 | 0 NA | NA | NA | NA | NA |
| Gm11420 | 0 NA | NA | NA | NA | NA |
| Gm11421 | 0 NA | NA | NA | NA | NA |
| Gm11422 | 0 NA | NA | NA | NA | NA |
| Gm11429 | 0 NA | NA | NA | NA | NA |
| Gm11430 | 0 NA | NA | NA | NA | NA |
| Gm11432 | 0 NA | NA | NA | NA | NA |
| Gm11433 | 0 NA | NA | NA | NA | NA |
| Gm11439 | 0 NA | NA | NA | NA | NA |
| Gm11443 | 0 NA | NA | NA | NA | NA |
| Gm11446 | 0 NA | NA | NA | NA | NA |
| Gm11447 | 0 NA | NA | NA | NA | NA |
| Gm11448 | 0 NA | NA | NA | NA | NA |
| Gm11451 | 0 NA | NA | NA | NA | NA |
| Gm11456 | 0 NA | NA | NA | NA | NA |
| Gm11460 | 0 NA | NA | NA | NA | NA |
| Gm11461 | 0 NA | NA | NA | NA | NA |
| Gm11462 | 0 NA | NA | NA | NA | NA |
| Gm11471 | 0 NA | NA | NA | NA | NA |
| Gm11473 | 0 NA | NA | NA | NA | NA |
| Gm11480 | 0 NA | NA | NA | NA | NA |
| Gm11481 | 0 NA | NA | NA | NA | NA |
| Gm11483 | 0 NA | NA | NA | NA | NA |
| Gm11484 | 0 NA | NA | NA | NA | NA |
| Gm11485 | 0 NA | NA | NA | NA | NA |
| Gm11486 | 0 NA | NA | NA | NA | NA |
| Gm11489 | 0 NA | NA | NA | NA | NA |
| Gm11490 | 0 NA | NA | NA | NA | NA |
| Gm11498 | 0 NA | NA | NA | NA | NA |
| Gm11501 | 0 NA | NA | NA | NA | NA |
| Gm11506 | 0 NA | NA | NA | NA | NA |
| Gm11507 | 0 NA | NA | NA | NA | NA |
| Gm11509 | 0 NA | NA | NA | NA | NA |
| Gm11511 | 0 NA | NA | NA | NA | NA |
| Gm11514 | 0 NA | NA | NA | NA | NA |



|         |      |    |    |    |    |
|---------|------|----|----|----|----|
| Gm11516 | 0 NA | NA | NA | NA | NA |
| Gm11522 | 0 NA | NA | NA | NA | NA |
| Gm11524 | 0 NA | NA | NA | NA | NA |
| Gm11531 | 0 NA | NA | NA | NA | NA |
| Gm11533 | 0 NA | NA | NA | NA | NA |
| Gm11541 | 0 NA | NA | NA | NA | NA |
| Gm11544 | 0 NA | NA | NA | NA | NA |
| Gm11546 | 0 NA | NA | NA | NA | NA |
| Gm11550 | 0 NA | NA | NA | NA | NA |
| Gm11553 | 0 NA | NA | NA | NA | NA |
| Gm11554 | 0 NA | NA | NA | NA | NA |
| Gm11555 | 0 NA | NA | NA | NA | NA |
| Gm11556 | 0 NA | NA | NA | NA | NA |
| Gm11558 | 0 NA | NA | NA | NA | NA |
| Gm11561 | 0 NA | NA | NA | NA | NA |
| Gm11562 | 0 NA | NA | NA | NA | NA |
| Gm11563 | 0 NA | NA | NA | NA | NA |
| Gm11564 | 0 NA | NA | NA | NA | NA |
| Gm11565 | 0 NA | NA | NA | NA | NA |
| Gm11566 | 0 NA | NA | NA | NA | NA |
| Gm11567 | 0 NA | NA | NA | NA | NA |
| Gm11568 | 0 NA | NA | NA | NA | NA |
| Gm11569 | 0 NA | NA | NA | NA | NA |
| Gm11572 | 0 NA | NA | NA | NA | NA |
| Gm11573 | 0 NA | NA | NA | NA | NA |
| Gm11575 | 0 NA | NA | NA | NA | NA |
| Gm11576 | 0 NA | NA | NA | NA | NA |
| Gm11577 | 0 NA | NA | NA | NA | NA |
| Gm11582 | 0 NA | NA | NA | NA | NA |
| Gm11584 | 0 NA | NA | NA | NA | NA |
| Gm11590 | 0 NA | NA | NA | NA | NA |
| Gm11591 | 0 NA | NA | NA | NA | NA |
| Gm11595 | 0 NA | NA | NA | NA | NA |
| Gm11596 | 0 NA | NA | NA | NA | NA |
| Gm11598 | 0 NA | NA | NA | NA | NA |
| Gm11600 | 0 NA | NA | NA | NA | NA |
| Gm11605 | 0 NA | NA | NA | NA | NA |
| Gm11606 | 0 NA | NA | NA | NA | NA |
| Gm11609 | 0 NA | NA | NA | NA | NA |
| Gm11617 | 0 NA | NA | NA | NA | NA |
| Gm11618 | 0 NA | NA | NA | NA | NA |
| Gm11621 | 0 NA | NA | NA | NA | NA |
| Gm11622 | 0 NA | NA | NA | NA | NA |
| Gm11623 | 0 NA | NA | NA | NA | NA |
| Gm11624 | 0 NA | NA | NA | NA | NA |
| Gm11625 | 0 NA | NA | NA | NA | NA |
| Gm11628 | 0 NA | NA | NA | NA | NA |
| Gm11631 | 0 NA | NA | NA | NA | NA |
| Gm11634 | 0 NA | NA | NA | NA | NA |
| Gm11643 | 0 NA | NA | NA | NA | NA |
| Gm11644 | 0 NA | NA | NA | NA | NA |
| Gm11645 | 0 NA | NA | NA | NA | NA |
| Gm11649 | 0 NA | NA | NA | NA | NA |
| Gm11652 | 0 NA | NA | NA | NA | NA |
| Gm11653 | 0 NA | NA | NA | NA | NA |
| Gm11660 | 0 NA | NA | NA | NA | NA |
| Gm11661 | 0 NA | NA | NA | NA | NA |
| Gm11663 | 0 NA | NA | NA | NA | NA |
| Gm11667 | 0 NA | NA | NA | NA | NA |
| Gm11668 | 0 NA | NA | NA | NA | NA |
| Gm11673 | 0 NA | NA | NA | NA | NA |
| Gm11677 | 0 NA | NA | NA | NA | NA |
| Gm11679 | 0 NA | NA | NA | NA | NA |
| Gm11689 | 0 NA | NA | NA | NA | NA |
| Gm11692 | 0 NA | NA | NA | NA | NA |
| Gm11693 | 0 NA | NA | NA | NA | NA |

|         |      |    |    |    |    |
|---------|------|----|----|----|----|
| Gm11699 | 0 NA | NA | NA | NA | NA |
| Gm11700 | 0 NA | NA | NA | NA | NA |
| Gm11702 | 0 NA | NA | NA | NA | NA |
| Gm11704 | 0 NA | NA | NA | NA | NA |
| Gm11708 | 0 NA | NA | NA | NA | NA |
| Gm11719 | 0 NA | NA | NA | NA | NA |
| Gm11726 | 0 NA | NA | NA | NA | NA |
| Gm11733 | 0 NA | NA | NA | NA | NA |
| Gm11735 | 0 NA | NA | NA | NA | NA |
| Gm11742 | 0 NA | NA | NA | NA | NA |
| Gm11746 | 0 NA | NA | NA | NA | NA |
| Gm11756 | 0 NA | NA | NA | NA | NA |
| Gm11757 | 0 NA | NA | NA | NA | NA |
| Gm11758 | 0 NA | NA | NA | NA | NA |
| Gm11759 | 0 NA | NA | NA | NA | NA |
| Gm11761 | 0 NA | NA | NA | NA | NA |
| Gm11763 | 0 NA | NA | NA | NA | NA |
| Gm11764 | 0 NA | NA | NA | NA | NA |
| Gm11771 | 0 NA | NA | NA | NA | NA |
| Gm11774 | 0 NA | NA | NA | NA | NA |
| Gm11779 | 0 NA | NA | NA | NA | NA |
| Gm11780 | 0 NA | NA | NA | NA | NA |
| Gm11781 | 0 NA | NA | NA | NA | NA |
| Gm11786 | 0 NA | NA | NA | NA | NA |
| Gm11787 | 0 NA | NA | NA | NA | NA |
| Gm11792 | 0 NA | NA | NA | NA | NA |
| Gm11794 | 0 NA | NA | NA | NA | NA |
| Gm11796 | 0 NA | NA | NA | NA | NA |
| Gm11797 | 0 NA | NA | NA | NA | NA |
| Gm11800 | 0 NA | NA | NA | NA | NA |
| Gm11801 | 0 NA | NA | NA | NA | NA |
| Gm11803 | 0 NA | NA | NA | NA | NA |
| Gm11804 | 0 NA | NA | NA | NA | NA |
| Gm11805 | 0 NA | NA | NA | NA | NA |
| Gm11809 | 0 NA | NA | NA | NA | NA |
| Gm11813 | 0 NA | NA | NA | NA | NA |
| Gm11814 | 0 NA | NA | NA | NA | NA |
| Gm11819 | 0 NA | NA | NA | NA | NA |
| Gm11821 | 0 NA | NA | NA | NA | NA |
| Gm11822 | 0 NA | NA | NA | NA | NA |
| Gm11824 | 0 NA | NA | NA | NA | NA |
| Gm11825 | 0 NA | NA | NA | NA | NA |
| Gm11826 | 0 NA | NA | NA | NA | NA |
| Gm11829 | 0 NA | NA | NA | NA | NA |
| Gm11833 | 0 NA | NA | NA | NA | NA |
| Gm11834 | 0 NA | NA | NA | NA | NA |
| Gm11838 | 0 NA | NA | NA | NA | NA |
| Gm11845 | 0 NA | NA | NA | NA | NA |
| Gm11848 | 0 NA | NA | NA | NA | NA |
| Gm11849 | 0 NA | NA | NA | NA | NA |
| Gm11850 | 0 NA | NA | NA | NA | NA |
| Gm11852 | 0 NA | NA | NA | NA | NA |
| Gm11853 | 0 NA | NA | NA | NA | NA |
| Gm11854 | 0 NA | NA | NA | NA | NA |
| Gm11855 | 0 NA | NA | NA | NA | NA |
| Gm11856 | 0 NA | NA | NA | NA | NA |
| Gm11857 | 0 NA | NA | NA | NA | NA |
| Gm11858 | 0 NA | NA | NA | NA | NA |
| Gm11859 | 0 NA | NA | NA | NA | NA |
| Gm11860 | 0 NA | NA | NA | NA | NA |
| Gm11862 | 0 NA | NA | NA | NA | NA |
| Gm11864 | 0 NA | NA | NA | NA | NA |
| Gm11866 | 0 NA | NA | NA | NA | NA |
| Gm11869 | 0 NA | NA | NA | NA | NA |
| Gm11871 | 0 NA | NA | NA | NA | NA |
| Gm11876 | 0 NA | NA | NA | NA | NA |

|         |      |    |    |    |    |
|---------|------|----|----|----|----|
| Gm11877 | 0 NA | NA | NA | NA | NA |
| Gm11880 | 0 NA | NA | NA | NA | NA |
| Gm11882 | 0 NA | NA | NA | NA | NA |
| Gm11885 | 0 NA | NA | NA | NA | NA |
| Gm11888 | 0 NA | NA | NA | NA | NA |
| Gm11890 | 0 NA | NA | NA | NA | NA |
| Gm11891 | 0 NA | NA | NA | NA | NA |
| Gm11894 | 0 NA | NA | NA | NA | NA |
| Gm11895 | 0 NA | NA | NA | NA | NA |
| Gm11896 | 0 NA | NA | NA | NA | NA |
| Gm11897 | 0 NA | NA | NA | NA | NA |
| Gm11898 | 0 NA | NA | NA | NA | NA |
| Gm11901 | 0 NA | NA | NA | NA | NA |
| Gm11902 | 0 NA | NA | NA | NA | NA |
| Gm11904 | 0 NA | NA | NA | NA | NA |
| Gm11905 | 0 NA | NA | NA | NA | NA |
| Gm11907 | 0 NA | NA | NA | NA | NA |
| Gm11908 | 0 NA | NA | NA | NA | NA |
| Gm11909 | 0 NA | NA | NA | NA | NA |
| Gm11911 | 0 NA | NA | NA | NA | NA |
| Gm11912 | 0 NA | NA | NA | NA | NA |
| Gm11914 | 0 NA | NA | NA | NA | NA |
| Gm11918 | 0 NA | NA | NA | NA | NA |
| Gm11919 | 0 NA | NA | NA | NA | NA |
| Gm11920 | 0 NA | NA | NA | NA | NA |
| Gm11923 | 0 NA | NA | NA | NA | NA |
| Gm11925 | 0 NA | NA | NA | NA | NA |
| Gm11926 | 0 NA | NA | NA | NA | NA |
| Gm11927 | 0 NA | NA | NA | NA | NA |
| Gm11928 | 0 NA | NA | NA | NA | NA |
| Gm11929 | 0 NA | NA | NA | NA | NA |
| Gm11930 | 0 NA | NA | NA | NA | NA |
| Gm11931 | 0 NA | NA | NA | NA | NA |
| Gm11933 | 0 NA | NA | NA | NA | NA |
| Gm11935 | 0 NA | NA | NA | NA | NA |
| Gm11936 | 0 NA | NA | NA | NA | NA |
| Gm11937 | 0 NA | NA | NA | NA | NA |
| Gm11938 | 0 NA | NA | NA | NA | NA |
| Gm11939 | 0 NA | NA | NA | NA | NA |
| Gm11941 | 0 NA | NA | NA | NA | NA |
| Gm11949 | 0 NA | NA | NA | NA | NA |
| Gm11950 | 0 NA | NA | NA | NA | NA |
| Gm11952 | 0 NA | NA | NA | NA | NA |
| Gm11955 | 0 NA | NA | NA | NA | NA |
| Gm11956 | 0 NA | NA | NA | NA | NA |
| Gm11962 | 0 NA | NA | NA | NA | NA |
| Gm11965 | 0 NA | NA | NA | NA | NA |
| Gm11966 | 0 NA | NA | NA | NA | NA |
| Gm11969 | 0 NA | NA | NA | NA | NA |
| Gm11970 | 0 NA | NA | NA | NA | NA |
| Gm11971 | 0 NA | NA | NA | NA | NA |
| Gm11972 | 0 NA | NA | NA | NA | NA |
| Gm11976 | 0 NA | NA | NA | NA | NA |
| Gm11979 | 0 NA | NA | NA | NA | NA |
| Gm11982 | 0 NA | NA | NA | NA | NA |
| Gm11984 | 0 NA | NA | NA | NA | NA |
| Gm11987 | 0 NA | NA | NA | NA | NA |
| Gm11988 | 0 NA | NA | NA | NA | NA |
| Gm11997 | 0 NA | NA | NA | NA | NA |
| Gm12001 | 0 NA | NA | NA | NA | NA |
| Gm12004 | 0 NA | NA | NA | NA | NA |
| Gm12005 | 0 NA | NA | NA | NA | NA |
| Gm12006 | 0 NA | NA | NA | NA | NA |
| Gm12007 | 0 NA | NA | NA | NA | NA |
| Gm12008 | 0 NA | NA | NA | NA | NA |
| Gm12010 | 0 NA | NA | NA | NA | NA |

|         |      |    |    |    |    |
|---------|------|----|----|----|----|
| Gm12012 | 0 NA | NA | NA | NA | NA |
| Gm12014 | 0 NA | NA | NA | NA | NA |
| Gm12015 | 0 NA | NA | NA | NA | NA |
| Gm12016 | 0 NA | NA | NA | NA | NA |
| Gm12017 | 0 NA | NA | NA | NA | NA |
| Gm12019 | 0 NA | NA | NA | NA | NA |
| Gm12025 | 0 NA | NA | NA | NA | NA |
| Gm12026 | 0 NA | NA | NA | NA | NA |
| Gm12028 | 0 NA | NA | NA | NA | NA |
| Gm12029 | 0 NA | NA | NA | NA | NA |
| Gm12030 | 0 NA | NA | NA | NA | NA |
| Gm12034 | 0 NA | NA | NA | NA | NA |
| Gm12035 | 0 NA | NA | NA | NA | NA |
| Gm12036 | 0 NA | NA | NA | NA | NA |
| Gm12038 | 0 NA | NA | NA | NA | NA |
| Gm12039 | 0 NA | NA | NA | NA | NA |
| Gm12040 | 0 NA | NA | NA | NA | NA |
| Gm12041 | 0 NA | NA | NA | NA | NA |
| Gm12044 | 0 NA | NA | NA | NA | NA |
| Gm12045 | 0 NA | NA | NA | NA | NA |
| Gm12046 | 0 NA | NA | NA | NA | NA |
| Gm12047 | 0 NA | NA | NA | NA | NA |
| Gm12053 | 0 NA | NA | NA | NA | NA |
| Gm12058 | 0 NA | NA | NA | NA | NA |
| Gm12062 | 0 NA | NA | NA | NA | NA |
| Gm12067 | 0 NA | NA | NA | NA | NA |
| Gm12071 | 0 NA | NA | NA | NA | NA |
| Gm12072 | 0 NA | NA | NA | NA | NA |
| Gm12073 | 0 NA | NA | NA | NA | NA |
| Gm12074 | 0 NA | NA | NA | NA | NA |
| Gm12075 | 0 NA | NA | NA | NA | NA |
| Gm12077 | 0 NA | NA | NA | NA | NA |
| Gm12079 | 0 NA | NA | NA | NA | NA |
| Gm12085 | 0 NA | NA | NA | NA | NA |
| Gm12086 | 0 NA | NA | NA | NA | NA |
| Gm12087 | 0 NA | NA | NA | NA | NA |
| Gm12090 | 0 NA | NA | NA | NA | NA |
| Gm12093 | 0 NA | NA | NA | NA | NA |
| Gm12094 | 0 NA | NA | NA | NA | NA |
| Gm12095 | 0 NA | NA | NA | NA | NA |
| Gm12096 | 0 NA | NA | NA | NA | NA |
| Gm12099 | 0 NA | NA | NA | NA | NA |
| Gm12102 | 0 NA | NA | NA | NA | NA |
| Gm12103 | 0 NA | NA | NA | NA | NA |
| Gm12109 | 0 NA | NA | NA | NA | NA |
| Gm12110 | 0 NA | NA | NA | NA | NA |
| Gm12115 | 0 NA | NA | NA | NA | NA |
| Gm12117 | 0 NA | NA | NA | NA | NA |
| Gm12118 | 0 NA | NA | NA | NA | NA |
| Gm12123 | 0 NA | NA | NA | NA | NA |
| Gm12124 | 0 NA | NA | NA | NA | NA |
| Gm12131 | 0 NA | NA | NA | NA | NA |
| Gm12133 | 0 NA | NA | NA | NA | NA |
| Gm12134 | 0 NA | NA | NA | NA | NA |
| Gm12135 | 0 NA | NA | NA | NA | NA |
| Gm12137 | 0 NA | NA | NA | NA | NA |
| Gm12140 | 0 NA | NA | NA | NA | NA |
| Gm12142 | 0 NA | NA | NA | NA | NA |
| Gm12143 | 0 NA | NA | NA | NA | NA |
| Gm12149 | 0 NA | NA | NA | NA | NA |
| Gm12151 | 0 NA | NA | NA | NA | NA |
| Gm12152 | 0 NA | NA | NA | NA | NA |
| Gm12155 | 0 NA | NA | NA | NA | NA |
| Gm12156 | 0 NA | NA | NA | NA | NA |
| Gm12161 | 0 NA | NA | NA | NA | NA |
| Gm12163 | 0 NA | NA | NA | NA | NA |

|         |      |    |    |    |    |
|---------|------|----|----|----|----|
| Gm12165 | 0 NA | NA | NA | NA | NA |
| Gm12169 | 0 NA | NA | NA | NA | NA |
| Gm12170 | 0 NA | NA | NA | NA | NA |
| Gm12173 | 0 NA | NA | NA | NA | NA |
| Gm12175 | 0 NA | NA | NA | NA | NA |
| Gm12178 | 0 NA | NA | NA | NA | NA |
| Gm12179 | 0 NA | NA | NA | NA | NA |
| Gm12181 | 0 NA | NA | NA | NA | NA |
| Gm12189 | 0 NA | NA | NA | NA | NA |
| Gm12190 | 0 NA | NA | NA | NA | NA |
| Gm12192 | 0 NA | NA | NA | NA | NA |
| Gm12193 | 0 NA | NA | NA | NA | NA |
| Gm12201 | 0 NA | NA | NA | NA | NA |
| Gm12203 | 0 NA | NA | NA | NA | NA |
| Gm12206 | 0 NA | NA | NA | NA | NA |
| Gm12209 | 0 NA | NA | NA | NA | NA |
| Gm12210 | 0 NA | NA | NA | NA | NA |
| Gm12213 | 0 NA | NA | NA | NA | NA |
| Gm12218 | 0 NA | NA | NA | NA | NA |
| Gm12220 | 0 NA | NA | NA | NA | NA |
| Gm12221 | 0 NA | NA | NA | NA | NA |
| Gm12225 | 0 NA | NA | NA | NA | NA |
| Gm12229 | 0 NA | NA | NA | NA | NA |
| Gm12230 | 0 NA | NA | NA | NA | NA |
| Gm12235 | 0 NA | NA | NA | NA | NA |
| Gm12237 | 0 NA | NA | NA | NA | NA |
| Gm12240 | 0 NA | NA | NA | NA | NA |
| Gm12241 | 0 NA | NA | NA | NA | NA |
| Gm12244 | 0 NA | NA | NA | NA | NA |
| Gm12245 | 0 NA | NA | NA | NA | NA |
| Gm12252 | 0 NA | NA | NA | NA | NA |
| Gm12255 | 0 NA | NA | NA | NA | NA |
| Gm12261 | 0 NA | NA | NA | NA | NA |
| Gm12262 | 0 NA | NA | NA | NA | NA |
| Gm12263 | 0 NA | NA | NA | NA | NA |
| Gm12266 | 0 NA | NA | NA | NA | NA |
| Gm12271 | 0 NA | NA | NA | NA | NA |
| Gm12274 | 0 NA | NA | NA | NA | NA |
| Gm12281 | 0 NA | NA | NA | NA | NA |
| Gm12285 | 0 NA | NA | NA | NA | NA |
| Gm12288 | 0 NA | NA | NA | NA | NA |
| Gm12291 | 0 NA | NA | NA | NA | NA |
| Gm12293 | 0 NA | NA | NA | NA | NA |
| Gm12297 | 0 NA | NA | NA | NA | NA |
| Gm12303 | 0 NA | NA | NA | NA | NA |
| Gm12304 | 0 NA | NA | NA | NA | NA |
| Gm12306 | 0 NA | NA | NA | NA | NA |
| Gm12307 | 0 NA | NA | NA | NA | NA |
| Gm12308 | 0 NA | NA | NA | NA | NA |
| Gm12309 | 0 NA | NA | NA | NA | NA |
| Gm12310 | 0 NA | NA | NA | NA | NA |
| Gm12311 | 0 NA | NA | NA | NA | NA |
| Gm12312 | 0 NA | NA | NA | NA | NA |
| Gm12313 | 0 NA | NA | NA | NA | NA |
| Gm12318 | 0 NA | NA | NA | NA | NA |
| Gm12321 | 0 NA | NA | NA | NA | NA |
| Gm12322 | 0 NA | NA | NA | NA | NA |
| Gm12327 | 0 NA | NA | NA | NA | NA |
| Gm12328 | 0 NA | NA | NA | NA | NA |
| Gm12329 | 0 NA | NA | NA | NA | NA |
| Gm12331 | 0 NA | NA | NA | NA | NA |
| Gm12332 | 0 NA | NA | NA | NA | NA |
| Gm12340 | 0 NA | NA | NA | NA | NA |
| Gm12344 | 0 NA | NA | NA | NA | NA |
| Gm12358 | 0 NA | NA | NA | NA | NA |
| Gm12361 | 0 NA | NA | NA | NA | NA |

|         |      |    |    |    |    |
|---------|------|----|----|----|----|
| Gm12362 | 0 NA | NA | NA | NA | NA |
| Gm12363 | 0 NA | NA | NA | NA | NA |
| Gm12365 | 0 NA | NA | NA | NA | NA |
| Gm12368 | 0 NA | NA | NA | NA | NA |
| Gm12369 | 0 NA | NA | NA | NA | NA |
| Gm12370 | 0 NA | NA | NA | NA | NA |
| Gm12375 | 0 NA | NA | NA | NA | NA |
| Gm12376 | 0 NA | NA | NA | NA | NA |
| Gm12377 | 0 NA | NA | NA | NA | NA |
| Gm12378 | 0 NA | NA | NA | NA | NA |
| Gm12379 | 0 NA | NA | NA | NA | NA |
| Gm12382 | 0 NA | NA | NA | NA | NA |
| Gm12383 | 0 NA | NA | NA | NA | NA |
| Gm12385 | 0 NA | NA | NA | NA | NA |
| Gm12386 | 0 NA | NA | NA | NA | NA |
| Gm12387 | 0 NA | NA | NA | NA | NA |
| Gm12389 | 0 NA | NA | NA | NA | NA |
| Gm12390 | 0 NA | NA | NA | NA | NA |
| Gm12391 | 0 NA | NA | NA | NA | NA |
| Gm12392 | 0 NA | NA | NA | NA | NA |
| Gm12393 | 0 NA | NA | NA | NA | NA |
| Gm12401 | 0 NA | NA | NA | NA | NA |
| Gm12402 | 0 NA | NA | NA | NA | NA |
| Gm12412 | 0 NA | NA | NA | NA | NA |
| Gm12413 | 0 NA | NA | NA | NA | NA |
| Gm12417 | 0 NA | NA | NA | NA | NA |
| Gm12418 | 0 NA | NA | NA | NA | NA |
| Gm12421 | 0 NA | NA | NA | NA | NA |
| Gm12422 | 0 NA | NA | NA | NA | NA |
| Gm12423 | 0 NA | NA | NA | NA | NA |
| Gm12425 | 0 NA | NA | NA | NA | NA |
| Gm12427 | 0 NA | NA | NA | NA | NA |
| Gm12428 | 0 NA | NA | NA | NA | NA |
| Gm12430 | 0 NA | NA | NA | NA | NA |
| Gm12431 | 0 NA | NA | NA | NA | NA |
| Gm12432 | 0 NA | NA | NA | NA | NA |
| Gm12433 | 0 NA | NA | NA | NA | NA |
| Gm12438 | 0 NA | NA | NA | NA | NA |
| Gm12441 | 0 NA | NA | NA | NA | NA |
| Gm12442 | 0 NA | NA | NA | NA | NA |
| Gm12443 | 0 NA | NA | NA | NA | NA |
| Gm12444 | 0 NA | NA | NA | NA | NA |
| Gm12445 | 0 NA | NA | NA | NA | NA |
| Gm12447 | 0 NA | NA | NA | NA | NA |
| Gm12448 | 0 NA | NA | NA | NA | NA |
| Gm12449 | 0 NA | NA | NA | NA | NA |
| Gm12451 | 0 NA | NA | NA | NA | NA |
| Gm12452 | 0 NA | NA | NA | NA | NA |
| Gm12453 | 0 NA | NA | NA | NA | NA |
| Gm12455 | 0 NA | NA | NA | NA | NA |
| Gm12458 | 0 NA | NA | NA | NA | NA |
| Gm12459 | 0 NA | NA | NA | NA | NA |
| Gm12460 | 0 NA | NA | NA | NA | NA |
| Gm12464 | 0 NA | NA | NA | NA | NA |
| Gm12465 | 0 NA | NA | NA | NA | NA |
| Gm12466 | 0 NA | NA | NA | NA | NA |
| Gm12467 | 0 NA | NA | NA | NA | NA |
| Gm12468 | 0 NA | NA | NA | NA | NA |
| Gm12469 | 0 NA | NA | NA | NA | NA |
| Gm12475 | 0 NA | NA | NA | NA | NA |
| Gm12477 | 0 NA | NA | NA | NA | NA |
| Gm12479 | 0 NA | NA | NA | NA | NA |
| Gm12485 | 0 NA | NA | NA | NA | NA |
| Gm12488 | 0 NA | NA | NA | NA | NA |
| Gm12489 | 0 NA | NA | NA | NA | NA |
| Gm12490 | 0 NA | NA | NA | NA | NA |

|         |      |    |    |    |    |
|---------|------|----|----|----|----|
| Gm12492 | 0 NA | NA | NA | NA | NA |
| Gm12495 | 0 NA | NA | NA | NA | NA |
| Gm12509 | 0 NA | NA | NA | NA | NA |
| Gm12512 | 0 NA | NA | NA | NA | NA |
| Gm12513 | 0 NA | NA | NA | NA | NA |
| Gm12515 | 0 NA | NA | NA | NA | NA |
| Gm12516 | 0 NA | NA | NA | NA | NA |
| Gm12518 | 0 NA | NA | NA | NA | NA |
| Gm12520 | 0 NA | NA | NA | NA | NA |
| Gm12529 | 0 NA | NA | NA | NA | NA |
| Gm12535 | 0 NA | NA | NA | NA | NA |
| Gm12538 | 0 NA | NA | NA | NA | NA |
| Gm12539 | 0 NA | NA | NA | NA | NA |
| Gm12550 | 0 NA | NA | NA | NA | NA |
| Gm12564 | 0 NA | NA | NA | NA | NA |
| Gm12566 | 0 NA | NA | NA | NA | NA |
| Gm12568 | 0 NA | NA | NA | NA | NA |
| Gm12570 | 0 NA | NA | NA | NA | NA |
| Gm12577 | 0 NA | NA | NA | NA | NA |
| Gm12578 | 0 NA | NA | NA | NA | NA |
| Gm12579 | 0 NA | NA | NA | NA | NA |
| Gm12582 | 0 NA | NA | NA | NA | NA |
| Gm12583 | 0 NA | NA | NA | NA | NA |
| Gm12585 | 0 NA | NA | NA | NA | NA |
| Gm12598 | 0 NA | NA | NA | NA | NA |
| Gm12599 | 0 NA | NA | NA | NA | NA |
| Gm12601 | 0 NA | NA | NA | NA | NA |
| Gm12604 | 0 NA | NA | NA | NA | NA |
| Gm12607 | 0 NA | NA | NA | NA | NA |
| Gm12608 | 0 NA | NA | NA | NA | NA |
| Gm12612 | 0 NA | NA | NA | NA | NA |
| Gm12613 | 0 NA | NA | NA | NA | NA |
| Gm12614 | 0 NA | NA | NA | NA | NA |
| Gm12615 | 0 NA | NA | NA | NA | NA |
| Gm12616 | 0 NA | NA | NA | NA | NA |
| Gm12617 | 0 NA | NA | NA | NA | NA |
| Gm12618 | 0 NA | NA | NA | NA | NA |
| Gm12619 | 0 NA | NA | NA | NA | NA |
| Gm12620 | 0 NA | NA | NA | NA | NA |
| Gm12621 | 0 NA | NA | NA | NA | NA |
| Gm12622 | 0 NA | NA | NA | NA | NA |
| Gm12623 | 0 NA | NA | NA | NA | NA |
| Gm12624 | 0 NA | NA | NA | NA | NA |
| Gm12625 | 0 NA | NA | NA | NA | NA |
| Gm12627 | 0 NA | NA | NA | NA | NA |
| Gm12628 | 0 NA | NA | NA | NA | NA |
| Gm12632 | 0 NA | NA | NA | NA | NA |
| Gm12633 | 0 NA | NA | NA | NA | NA |
| Gm12634 | 0 NA | NA | NA | NA | NA |
| Gm12635 | 0 NA | NA | NA | NA | NA |
| Gm12636 | 0 NA | NA | NA | NA | NA |
| Gm12638 | 0 NA | NA | NA | NA | NA |
| Gm12639 | 0 NA | NA | NA | NA | NA |
| Gm12640 | 0 NA | NA | NA | NA | NA |
| Gm12641 | 0 NA | NA | NA | NA | NA |
| Gm12642 | 0 NA | NA | NA | NA | NA |
| Gm12643 | 0 NA | NA | NA | NA | NA |
| Gm12644 | 0 NA | NA | NA | NA | NA |
| Gm12645 | 0 NA | NA | NA | NA | NA |
| Gm12646 | 0 NA | NA | NA | NA | NA |
| Gm12647 | 0 NA | NA | NA | NA | NA |
| Gm12650 | 0 NA | NA | NA | NA | NA |
| Gm12653 | 0 NA | NA | NA | NA | NA |
| Gm12654 | 0 NA | NA | NA | NA | NA |
| Gm12656 | 0 NA | NA | NA | NA | NA |
| Gm12677 | 0 NA | NA | NA | NA | NA |



|         |      |    |    |    |    |
|---------|------|----|----|----|----|
| Gm12683 | 0 NA | NA | NA | NA | NA |
| Gm12684 | 0 NA | NA | NA | NA | NA |
| Gm12685 | 0 NA | NA | NA | NA | NA |
| Gm12686 | 0 NA | NA | NA | NA | NA |
| Gm12687 | 0 NA | NA | NA | NA | NA |
| Gm12692 | 0 NA | NA | NA | NA | NA |
| Gm12695 | 0 NA | NA | NA | NA | NA |
| Gm12697 | 0 NA | NA | NA | NA | NA |
| Gm12700 | 0 NA | NA | NA | NA | NA |
| Gm12706 | 0 NA | NA | NA | NA | NA |
| Gm12716 | 0 NA | NA | NA | NA | NA |
| Gm12717 | 0 NA | NA | NA | NA | NA |
| Gm12719 | 0 NA | NA | NA | NA | NA |
| Gm12721 | 0 NA | NA | NA | NA | NA |
| Gm12722 | 0 NA | NA | NA | NA | NA |
| Gm12723 | 0 NA | NA | NA | NA | NA |
| Gm12727 | 0 NA | NA | NA | NA | NA |
| Gm12728 | 0 NA | NA | NA | NA | NA |
| Gm12731 | 0 NA | NA | NA | NA | NA |
| Gm12732 | 0 NA | NA | NA | NA | NA |
| Gm12736 | 0 NA | NA | NA | NA | NA |
| Gm12740 | 0 NA | NA | NA | NA | NA |
| Gm12742 | 0 NA | NA | NA | NA | NA |
| Gm12745 | 0 NA | NA | NA | NA | NA |
| Gm12748 | 0 NA | NA | NA | NA | NA |
| Gm12749 | 0 NA | NA | NA | NA | NA |
| Gm12752 | 0 NA | NA | NA | NA | NA |
| Gm12755 | 0 NA | NA | NA | NA | NA |
| Gm12765 | 0 NA | NA | NA | NA | NA |
| Gm12768 | 0 NA | NA | NA | NA | NA |
| Gm12770 | 0 NA | NA | NA | NA | NA |
| Gm12771 | 0 NA | NA | NA | NA | NA |
| Gm12773 | 0 NA | NA | NA | NA | NA |
| Gm12774 | 0 NA | NA | NA | NA | NA |
| Gm12778 | 0 NA | NA | NA | NA | NA |
| Gm12779 | 0 NA | NA | NA | NA | NA |
| Gm12780 | 0 NA | NA | NA | NA | NA |
| Gm12782 | 0 NA | NA | NA | NA | NA |
| Gm12787 | 0 NA | NA | NA | NA | NA |
| Gm12790 | 0 NA | NA | NA | NA | NA |
| Gm12793 | 0 NA | NA | NA | NA | NA |
| Gm12795 | 0 NA | NA | NA | NA | NA |
| Gm12797 | 0 NA | NA | NA | NA | NA |
| Gm12799 | 0 NA | NA | NA | NA | NA |
| Gm12800 | 0 NA | NA | NA | NA | NA |
| Gm12803 | 0 NA | NA | NA | NA | NA |
| Gm12804 | 0 NA | NA | NA | NA | NA |
| Gm12805 | 0 NA | NA | NA | NA | NA |
| Gm12806 | 0 NA | NA | NA | NA | NA |
| Gm12808 | 0 NA | NA | NA | NA | NA |
| Gm12813 | 0 NA | NA | NA | NA | NA |
| Gm12814 | 0 NA | NA | NA | NA | NA |
| Gm12815 | 0 NA | NA | NA | NA | NA |
| Gm12817 | 0 NA | NA | NA | NA | NA |
| Gm12818 | 0 NA | NA | NA | NA | NA |
| Gm12819 | 0 NA | NA | NA | NA | NA |
| Gm12820 | 0 NA | NA | NA | NA | NA |
| Gm12825 | 0 NA | NA | NA | NA | NA |
| Gm12826 | 0 NA | NA | NA | NA | NA |
| Gm12833 | 0 NA | NA | NA | NA | NA |
| Gm12834 | 0 NA | NA | NA | NA | NA |
| Gm12837 | 0 NA | NA | NA | NA | NA |
| Gm12845 | 0 NA | NA | NA | NA | NA |
| Gm12849 | 0 NA | NA | NA | NA | NA |
| Gm12851 | 0 NA | NA | NA | NA | NA |
| Gm12855 | 0 NA | NA | NA | NA | NA |

|         |      |    |    |    |    |
|---------|------|----|----|----|----|
| Gm12856 | 0 NA | NA | NA | NA | NA |
| Gm12858 | 0 NA | NA | NA | NA | NA |
| Gm12864 | 0 NA | NA | NA | NA | NA |
| Gm12870 | 0 NA | NA | NA | NA | NA |
| Gm12871 | 0 NA | NA | NA | NA | NA |
| Gm12872 | 0 NA | NA | NA | NA | NA |
| Gm12873 | 0 NA | NA | NA | NA | NA |
| Gm12874 | 0 NA | NA | NA | NA | NA |
| Gm12875 | 0 NA | NA | NA | NA | NA |
| Gm12876 | 0 NA | NA | NA | NA | NA |
| Gm12877 | 0 NA | NA | NA | NA | NA |
| Gm12878 | 0 NA | NA | NA | NA | NA |
| Gm12880 | 0 NA | NA | NA | NA | NA |
| Gm12881 | 0 NA | NA | NA | NA | NA |
| Gm12883 | 0 NA | NA | NA | NA | NA |
| Gm12884 | 0 NA | NA | NA | NA | NA |
| Gm12885 | 0 NA | NA | NA | NA | NA |
| Gm12887 | 0 NA | NA | NA | NA | NA |
| Gm12888 | 0 NA | NA | NA | NA | NA |
| Gm12890 | 0 NA | NA | NA | NA | NA |
| Gm12891 | 0 NA | NA | NA | NA | NA |
| Gm12892 | 0 NA | NA | NA | NA | NA |
| Gm12893 | 0 NA | NA | NA | NA | NA |
| Gm12897 | 0 NA | NA | NA | NA | NA |
| Gm12899 | 0 NA | NA | NA | NA | NA |
| Gm12900 | 0 NA | NA | NA | NA | NA |
| Gm12904 | 0 NA | NA | NA | NA | NA |
| Gm12906 | 0 NA | NA | NA | NA | NA |
| Gm12919 | 0 NA | NA | NA | NA | NA |
| Gm12920 | 0 NA | NA | NA | NA | NA |
| Gm12924 | 0 NA | NA | NA | NA | NA |
| Gm12926 | 0 NA | NA | NA | NA | NA |
| Gm12929 | 0 NA | NA | NA | NA | NA |
| Gm12931 | 0 NA | NA | NA | NA | NA |
| Gm12935 | 0 NA | NA | NA | NA | NA |
| Gm12939 | 0 NA | NA | NA | NA | NA |
| Gm12950 | 0 NA | NA | NA | NA | NA |
| Gm12954 | 0 NA | NA | NA | NA | NA |
| Gm12956 | 0 NA | NA | NA | NA | NA |
| Gm12957 | 0 NA | NA | NA | NA | NA |
| Gm12959 | 0 NA | NA | NA | NA | NA |
| Gm12961 | 0 NA | NA | NA | NA | NA |
| Gm12966 | 0 NA | NA | NA | NA | NA |
| Gm12967 | 0 NA | NA | NA | NA | NA |
| Gm12969 | 0 NA | NA | NA | NA | NA |
| Gm12982 | 0 NA | NA | NA | NA | NA |
| Gm12983 | 0 NA | NA | NA | NA | NA |
| Gm12985 | 0 NA | NA | NA | NA | NA |
| Gm12986 | 0 NA | NA | NA | NA | NA |
| Gm12989 | 0 NA | NA | NA | NA | NA |
| Gm12991 | 0 NA | NA | NA | NA | NA |
| Gm12997 | 0 NA | NA | NA | NA | NA |
| Gm12998 | 0 NA | NA | NA | NA | NA |
| Gm13000 | 0 NA | NA | NA | NA | NA |
| Gm13006 | 0 NA | NA | NA | NA | NA |
| Gm13009 | 0 NA | NA | NA | NA | NA |
| Gm13013 | 0 NA | NA | NA | NA | NA |
| Gm13015 | 0 NA | NA | NA | NA | NA |
| Gm13019 | 0 NA | NA | NA | NA | NA |
| Gm13022 | 0 NA | NA | NA | NA | NA |
| Gm13023 | 0 NA | NA | NA | NA | NA |
| Gm13024 | 0 NA | NA | NA | NA | NA |
| Gm13030 | 0 NA | NA | NA | NA | NA |
| Gm13035 | 0 NA | NA | NA | NA | NA |
| Gm13036 | 0 NA | NA | NA | NA | NA |
| Gm13038 | 0 NA | NA | NA | NA | NA |

|         |      |    |    |    |    |
|---------|------|----|----|----|----|
| Gm13041 | 0 NA | NA | NA | NA | NA |
| Gm13042 | 0 NA | NA | NA | NA | NA |
| Gm13043 | 0 NA | NA | NA | NA | NA |
| Gm13045 | 0 NA | NA | NA | NA | NA |
| Gm13046 | 0 NA | NA | NA | NA | NA |
| Gm13047 | 0 NA | NA | NA | NA | NA |
| Gm13057 | 0 NA | NA | NA | NA | NA |
| Gm13058 | 0 NA | NA | NA | NA | NA |
| Gm13059 | 0 NA | NA | NA | NA | NA |
| Gm13064 | 0 NA | NA | NA | NA | NA |
| Gm13065 | 0 NA | NA | NA | NA | NA |
| Gm13076 | 0 NA | NA | NA | NA | NA |
| Gm13082 | 0 NA | NA | NA | NA | NA |
| Gm13084 | 0 NA | NA | NA | NA | NA |
| Gm13085 | 0 NA | NA | NA | NA | NA |
| Gm13087 | 0 NA | NA | NA | NA | NA |
| Gm13088 | 0 NA | NA | NA | NA | NA |
| Gm13089 | 0 NA | NA | NA | NA | NA |
| Gm13090 | 0 NA | NA | NA | NA | NA |
| Gm13094 | 0 NA | NA | NA | NA | NA |
| Gm13100 | 0 NA | NA | NA | NA | NA |
| Gm13102 | 0 NA | NA | NA | NA | NA |
| Gm13103 | 0 NA | NA | NA | NA | NA |
| Gm13104 | 0 NA | NA | NA | NA | NA |
| Gm13106 | 0 NA | NA | NA | NA | NA |
| Gm13108 | 0 NA | NA | NA | NA | NA |
| Gm13114 | 0 NA | NA | NA | NA | NA |
| Gm13117 | 0 NA | NA | NA | NA | NA |
| Gm13118 | 0 NA | NA | NA | NA | NA |
| Gm13120 | 0 NA | NA | NA | NA | NA |
| Gm13122 | 0 NA | NA | NA | NA | NA |
| Gm13126 | 0 NA | NA | NA | NA | NA |
| Gm13127 | 0 NA | NA | NA | NA | NA |
| Gm13128 | 0 NA | NA | NA | NA | NA |
| Gm13130 | 0 NA | NA | NA | NA | NA |
| Gm13132 | 0 NA | NA | NA | NA | NA |
| Gm13137 | 0 NA | NA | NA | NA | NA |
| Gm13140 | 0 NA | NA | NA | NA | NA |
| Gm13142 | 0 NA | NA | NA | NA | NA |
| Gm13144 | 0 NA | NA | NA | NA | NA |
| Gm13149 | 0 NA | NA | NA | NA | NA |
| Gm13153 | 0 NA | NA | NA | NA | NA |
| Gm13155 | 0 NA | NA | NA | NA | NA |
| Gm13158 | 0 NA | NA | NA | NA | NA |
| Gm13161 | 0 NA | NA | NA | NA | NA |
| Gm13162 | 0 NA | NA | NA | NA | NA |
| Gm13163 | 0 NA | NA | NA | NA | NA |
| Gm13168 | 0 NA | NA | NA | NA | NA |
| Gm13170 | 0 NA | NA | NA | NA | NA |
| Gm13172 | 0 NA | NA | NA | NA | NA |
| Gm13176 | 0 NA | NA | NA | NA | NA |
| Gm13181 | 0 NA | NA | NA | NA | NA |
| Gm13182 | 0 NA | NA | NA | NA | NA |
| Gm13183 | 0 NA | NA | NA | NA | NA |
| Gm13186 | 0 NA | NA | NA | NA | NA |
| Gm13188 | 0 NA | NA | NA | NA | NA |
| Gm13192 | 0 NA | NA | NA | NA | NA |
| Gm13193 | 0 NA | NA | NA | NA | NA |
| Gm13195 | 0 NA | NA | NA | NA | NA |
| Gm13197 | 0 NA | NA | NA | NA | NA |
| Gm13198 | 0 NA | NA | NA | NA | NA |
| Gm13207 | 0 NA | NA | NA | NA | NA |
| Gm13210 | 0 NA | NA | NA | NA | NA |
| Gm13220 | 0 NA | NA | NA | NA | NA |
| Gm13221 | 0 NA | NA | NA | NA | NA |
| Gm13222 | 0 NA | NA | NA | NA | NA |

|         |      |    |    |    |    |
|---------|------|----|----|----|----|
| Gm13223 | 0 NA | NA | NA | NA | NA |
| Gm13224 | 0 NA | NA | NA | NA | NA |
| Gm13229 | 0 NA | NA | NA | NA | NA |
| Gm13239 | 0 NA | NA | NA | NA | NA |
| Gm13240 | 0 NA | NA | NA | NA | NA |
| Gm13243 | 0 NA | NA | NA | NA | NA |
| Gm13249 | 0 NA | NA | NA | NA | NA |
| Gm13250 | 0 NA | NA | NA | NA | NA |
| Gm13252 | 0 NA | NA | NA | NA | NA |
| Gm13254 | 0 NA | NA | NA | NA | NA |
| Gm13260 | 0 NA | NA | NA | NA | NA |
| Gm13263 | 0 NA | NA | NA | NA | NA |
| Gm13265 | 0 NA | NA | NA | NA | NA |
| Gm13271 | 0 NA | NA | NA | NA | NA |
| Gm13272 | 0 NA | NA | NA | NA | NA |
| Gm13273 | 0 NA | NA | NA | NA | NA |
| Gm13275 | 0 NA | NA | NA | NA | NA |
| Gm13277 | 0 NA | NA | NA | NA | NA |
| Gm13278 | 0 NA | NA | NA | NA | NA |
| Gm13279 | 0 NA | NA | NA | NA | NA |
| Gm13281 | 0 NA | NA | NA | NA | NA |
| Gm13283 | 0 NA | NA | NA | NA | NA |
| Gm13284 | 0 NA | NA | NA | NA | NA |
| Gm13287 | 0 NA | NA | NA | NA | NA |
| Gm13288 | 0 NA | NA | NA | NA | NA |
| Gm13289 | 0 NA | NA | NA | NA | NA |
| Gm13294 | 0 NA | NA | NA | NA | NA |
| Gm13296 | 0 NA | NA | NA | NA | NA |
| Gm13297 | 0 NA | NA | NA | NA | NA |
| Gm1330  | 0 NA | NA | NA | NA | NA |
| Gm13310 | 0 NA | NA | NA | NA | NA |
| Gm13311 | 0 NA | NA | NA | NA | NA |
| Gm13314 | 0 NA | NA | NA | NA | NA |
| Gm13315 | 0 NA | NA | NA | NA | NA |
| Gm13316 | 0 NA | NA | NA | NA | NA |
| Gm13325 | 0 NA | NA | NA | NA | NA |
| Gm13326 | 0 NA | NA | NA | NA | NA |
| Gm13329 | 0 NA | NA | NA | NA | NA |
| Gm13331 | 0 NA | NA | NA | NA | NA |
| Gm13332 | 0 NA | NA | NA | NA | NA |
| Gm13333 | 0 NA | NA | NA | NA | NA |
| Gm13337 | 0 NA | NA | NA | NA | NA |
| Gm13338 | 0 NA | NA | NA | NA | NA |
| Gm13342 | 0 NA | NA | NA | NA | NA |
| Gm13343 | 0 NA | NA | NA | NA | NA |
| Gm13345 | 0 NA | NA | NA | NA | NA |
| Gm13347 | 0 NA | NA | NA | NA | NA |
| Gm1335  | 0 NA | NA | NA | NA | NA |
| Gm13352 | 0 NA | NA | NA | NA | NA |
| Gm13353 | 0 NA | NA | NA | NA | NA |
| Gm13355 | 0 NA | NA | NA | NA | NA |
| Gm13356 | 0 NA | NA | NA | NA | NA |
| Gm13358 | 0 NA | NA | NA | NA | NA |
| Gm13360 | 0 NA | NA | NA | NA | NA |
| Gm13367 | 0 NA | NA | NA | NA | NA |
| Gm13368 | 0 NA | NA | NA | NA | NA |
| Gm13369 | 0 NA | NA | NA | NA | NA |
| Gm13370 | 0 NA | NA | NA | NA | NA |
| Gm13377 | 0 NA | NA | NA | NA | NA |
| Gm13379 | 0 NA | NA | NA | NA | NA |
| Gm13384 | 0 NA | NA | NA | NA | NA |
| Gm13385 | 0 NA | NA | NA | NA | NA |
| Gm13386 | 0 NA | NA | NA | NA | NA |
| Gm13392 | 0 NA | NA | NA | NA | NA |
| Gm13396 | 0 NA | NA | NA | NA | NA |
| Gm13397 | 0 NA | NA | NA | NA | NA |

|         |      |    |    |    |    |
|---------|------|----|----|----|----|
| Gm13400 | 0 NA | NA | NA | NA | NA |
| Gm13406 | 0 NA | NA | NA | NA | NA |
| Gm13409 | 0 NA | NA | NA | NA | NA |
| Gm13414 | 0 NA | NA | NA | NA | NA |
| Gm13416 | 0 NA | NA | NA | NA | NA |
| Gm13419 | 0 NA | NA | NA | NA | NA |
| Gm13422 | 0 NA | NA | NA | NA | NA |
| Gm13424 | 0 NA | NA | NA | NA | NA |
| Gm13426 | 0 NA | NA | NA | NA | NA |
| Gm13428 | 0 NA | NA | NA | NA | NA |
| Gm13430 | 0 NA | NA | NA | NA | NA |
| Gm13433 | 0 NA | NA | NA | NA | NA |
| Gm13435 | 0 NA | NA | NA | NA | NA |
| Gm13438 | 0 NA | NA | NA | NA | NA |
| Gm13439 | 0 NA | NA | NA | NA | NA |
| Gm13440 | 0 NA | NA | NA | NA | NA |
| Gm13445 | 0 NA | NA | NA | NA | NA |
| Gm13450 | 0 NA | NA | NA | NA | NA |
| Gm13451 | 0 NA | NA | NA | NA | NA |
| Gm13452 | 0 NA | NA | NA | NA | NA |
| Gm13454 | 0 NA | NA | NA | NA | NA |
| Gm13455 | 0 NA | NA | NA | NA | NA |
| Gm13457 | 0 NA | NA | NA | NA | NA |
| Gm13458 | 0 NA | NA | NA | NA | NA |
| Gm13459 | 0 NA | NA | NA | NA | NA |
| Gm13460 | 0 NA | NA | NA | NA | NA |
| Gm13461 | 0 NA | NA | NA | NA | NA |
| Gm13462 | 0 NA | NA | NA | NA | NA |
| Gm13463 | 0 NA | NA | NA | NA | NA |
| Gm13466 | 0 NA | NA | NA | NA | NA |
| Gm13469 | 0 NA | NA | NA | NA | NA |
| Gm13471 | 0 NA | NA | NA | NA | NA |
| Gm13473 | 0 NA | NA | NA | NA | NA |
| Gm13474 | 0 NA | NA | NA | NA | NA |
| Gm13475 | 0 NA | NA | NA | NA | NA |
| Gm13477 | 0 NA | NA | NA | NA | NA |
| Gm13478 | 0 NA | NA | NA | NA | NA |
| Gm13482 | 0 NA | NA | NA | NA | NA |
| Gm13484 | 0 NA | NA | NA | NA | NA |
| Gm13486 | 0 NA | NA | NA | NA | NA |
| Gm13487 | 0 NA | NA | NA | NA | NA |
| Gm13488 | 0 NA | NA | NA | NA | NA |
| Gm13489 | 0 NA | NA | NA | NA | NA |
| Gm13491 | 0 NA | NA | NA | NA | NA |
| Gm13492 | 0 NA | NA | NA | NA | NA |
| Gm13494 | 0 NA | NA | NA | NA | NA |
| Gm13495 | 0 NA | NA | NA | NA | NA |
| Gm13500 | 0 NA | NA | NA | NA | NA |
| Gm13501 | 0 NA | NA | NA | NA | NA |
| Gm13503 | 0 NA | NA | NA | NA | NA |
| Gm13504 | 0 NA | NA | NA | NA | NA |
| Gm13505 | 0 NA | NA | NA | NA | NA |
| Gm13510 | 0 NA | NA | NA | NA | NA |
| Gm13525 | 0 NA | NA | NA | NA | NA |
| Gm13526 | 0 NA | NA | NA | NA | NA |
| Gm13527 | 0 NA | NA | NA | NA | NA |
| Gm13531 | 0 NA | NA | NA | NA | NA |
| Gm13533 | 0 NA | NA | NA | NA | NA |
| Gm13534 | 0 NA | NA | NA | NA | NA |
| Gm13539 | 0 NA | NA | NA | NA | NA |
| Gm13541 | 0 NA | NA | NA | NA | NA |
| Gm13543 | 0 NA | NA | NA | NA | NA |
| Gm13545 | 0 NA | NA | NA | NA | NA |
| Gm13549 | 0 NA | NA | NA | NA | NA |
| Gm13550 | 0 NA | NA | NA | NA | NA |
| Gm13551 | 0 NA | NA | NA | NA | NA |

|         |      |    |    |    |    |
|---------|------|----|----|----|----|
| Gm13552 | 0 NA | NA | NA | NA | NA |
| Gm13555 | 0 NA | NA | NA | NA | NA |
| Gm13557 | 0 NA | NA | NA | NA | NA |
| Gm13559 | 0 NA | NA | NA | NA | NA |
| Gm13560 | 0 NA | NA | NA | NA | NA |
| Gm13566 | 0 NA | NA | NA | NA | NA |
| Gm13570 | 0 NA | NA | NA | NA | NA |
| Gm13574 | 0 NA | NA | NA | NA | NA |
| Gm13576 | 0 NA | NA | NA | NA | NA |
| Gm13579 | 0 NA | NA | NA | NA | NA |
| Gm13586 | 0 NA | NA | NA | NA | NA |
| Gm13588 | 0 NA | NA | NA | NA | NA |
| Gm13590 | 0 NA | NA | NA | NA | NA |
| Gm13593 | 0 NA | NA | NA | NA | NA |
| Gm136   | 0 NA | NA | NA | NA | NA |
| Gm13600 | 0 NA | NA | NA | NA | NA |
| Gm13602 | 0 NA | NA | NA | NA | NA |
| Gm13603 | 0 NA | NA | NA | NA | NA |
| Gm13614 | 0 NA | NA | NA | NA | NA |
| Gm13615 | 0 NA | NA | NA | NA | NA |
| Gm13616 | 0 NA | NA | NA | NA | NA |
| Gm13622 | 0 NA | NA | NA | NA | NA |
| Gm13624 | 0 NA | NA | NA | NA | NA |
| Gm13640 | 0 NA | NA | NA | NA | NA |
| Gm13641 | 0 NA | NA | NA | NA | NA |
| Gm13649 | 0 NA | NA | NA | NA | NA |
| Gm13651 | 0 NA | NA | NA | NA | NA |
| Gm13664 | 0 NA | NA | NA | NA | NA |
| Gm13665 | 0 NA | NA | NA | NA | NA |
| Gm13668 | 0 NA | NA | NA | NA | NA |
| Gm13670 | 0 NA | NA | NA | NA | NA |
| Gm13672 | 0 NA | NA | NA | NA | NA |
| Gm13673 | 0 NA | NA | NA | NA | NA |
| Gm13674 | 0 NA | NA | NA | NA | NA |
| Gm13676 | 0 NA | NA | NA | NA | NA |
| Gm13677 | 0 NA | NA | NA | NA | NA |
| Gm13678 | 0 NA | NA | NA | NA | NA |
| Gm13681 | 0 NA | NA | NA | NA | NA |
| Gm13682 | 0 NA | NA | NA | NA | NA |
| Gm13687 | 0 NA | NA | NA | NA | NA |
| Gm13690 | 0 NA | NA | NA | NA | NA |
| Gm13692 | 0 NA | NA | NA | NA | NA |
| Gm13700 | 0 NA | NA | NA | NA | NA |
| Gm13702 | 0 NA | NA | NA | NA | NA |
| Gm13712 | 0 NA | NA | NA | NA | NA |
| Gm13714 | 0 NA | NA | NA | NA | NA |
| Gm13723 | 0 NA | NA | NA | NA | NA |
| Gm13724 | 0 NA | NA | NA | NA | NA |
| Gm13725 | 0 NA | NA | NA | NA | NA |
| Gm13728 | 0 NA | NA | NA | NA | NA |
| Gm13730 | 0 NA | NA | NA | NA | NA |
| Gm13731 | 0 NA | NA | NA | NA | NA |
| Gm13732 | 0 NA | NA | NA | NA | NA |
| Gm13733 | 0 NA | NA | NA | NA | NA |
| Gm13735 | 0 NA | NA | NA | NA | NA |
| Gm13737 | 0 NA | NA | NA | NA | NA |
| Gm13738 | 0 NA | NA | NA | NA | NA |
| Gm13739 | 0 NA | NA | NA | NA | NA |
| Gm13742 | 0 NA | NA | NA | NA | NA |
| Gm13743 | 0 NA | NA | NA | NA | NA |
| Gm13744 | 0 NA | NA | NA | NA | NA |
| Gm13745 | 0 NA | NA | NA | NA | NA |
| Gm13755 | 0 NA | NA | NA | NA | NA |
| Gm13756 | 0 NA | NA | NA | NA | NA |
| Gm13761 | 0 NA | NA | NA | NA | NA |
| Gm13767 | 0 NA | NA | NA | NA | NA |

|         |      |    |    |    |    |
|---------|------|----|----|----|----|
| Gm13768 | 0 NA | NA | NA | NA | NA |
| Gm13770 | 0 NA | NA | NA | NA | NA |
| Gm13772 | 0 NA | NA | NA | NA | NA |
| Gm13784 | 0 NA | NA | NA | NA | NA |
| Gm13788 | 0 NA | NA | NA | NA | NA |
| Gm13792 | 0 NA | NA | NA | NA | NA |
| Gm13798 | 0 NA | NA | NA | NA | NA |
| Gm13801 | 0 NA | NA | NA | NA | NA |
| Gm13803 | 0 NA | NA | NA | NA | NA |
| Gm13804 | 0 NA | NA | NA | NA | NA |
| Gm13806 | 0 NA | NA | NA | NA | NA |
| Gm13808 | 0 NA | NA | NA | NA | NA |
| Gm13809 | 0 NA | NA | NA | NA | NA |
| Gm13810 | 0 NA | NA | NA | NA | NA |
| Gm13811 | 0 NA | NA | NA | NA | NA |
| Gm13812 | 0 NA | NA | NA | NA | NA |
| Gm13813 | 0 NA | NA | NA | NA | NA |
| Gm13815 | 0 NA | NA | NA | NA | NA |
| Gm13818 | 0 NA | NA | NA | NA | NA |
| Gm13823 | 0 NA | NA | NA | NA | NA |
| Gm13827 | 0 NA | NA | NA | NA | NA |
| Gm13828 | 0 NA | NA | NA | NA | NA |
| Gm13829 | 0 NA | NA | NA | NA | NA |
| Gm13831 | 0 NA | NA | NA | NA | NA |
| Gm13836 | 0 NA | NA | NA | NA | NA |
| Gm13852 | 0 NA | NA | NA | NA | NA |
| Gm13854 | 0 NA | NA | NA | NA | NA |
| Gm13857 | 0 NA | NA | NA | NA | NA |
| Gm13859 | 0 NA | NA | NA | NA | NA |
| Gm13862 | 0 NA | NA | NA | NA | NA |
| Gm13863 | 0 NA | NA | NA | NA | NA |
| Gm13865 | 0 NA | NA | NA | NA | NA |
| Gm13866 | 0 NA | NA | NA | NA | NA |
| Gm13867 | 0 NA | NA | NA | NA | NA |
| Gm13870 | 0 NA | NA | NA | NA | NA |
| Gm13871 | 0 NA | NA | NA | NA | NA |
| Gm13873 | 0 NA | NA | NA | NA | NA |
| Gm13875 | 0 NA | NA | NA | NA | NA |
| Gm13876 | 0 NA | NA | NA | NA | NA |
| Gm13877 | 0 NA | NA | NA | NA | NA |
| Gm13878 | 0 NA | NA | NA | NA | NA |
| Gm13879 | 0 NA | NA | NA | NA | NA |
| Gm13884 | 0 NA | NA | NA | NA | NA |
| Gm13885 | 0 NA | NA | NA | NA | NA |
| Gm13888 | 0 NA | NA | NA | NA | NA |
| Gm13898 | 0 NA | NA | NA | NA | NA |
| Gm13899 | 0 NA | NA | NA | NA | NA |
| Gm13900 | 0 NA | NA | NA | NA | NA |
| Gm13901 | 0 NA | NA | NA | NA | NA |
| Gm13903 | 0 NA | NA | NA | NA | NA |
| Gm13910 | 0 NA | NA | NA | NA | NA |
| Gm13913 | 0 NA | NA | NA | NA | NA |
| Gm13914 | 0 NA | NA | NA | NA | NA |
| Gm13915 | 0 NA | NA | NA | NA | NA |
| Gm13916 | 0 NA | NA | NA | NA | NA |
| Gm13922 | 0 NA | NA | NA | NA | NA |
| Gm13924 | 0 NA | NA | NA | NA | NA |
| Gm13925 | 0 NA | NA | NA | NA | NA |
| Gm13929 | 0 NA | NA | NA | NA | NA |
| Gm13930 | 0 NA | NA | NA | NA | NA |
| Gm13932 | 0 NA | NA | NA | NA | NA |
| Gm13935 | 0 NA | NA | NA | NA | NA |
| Gm13937 | 0 NA | NA | NA | NA | NA |
| Gm13940 | 0 NA | NA | NA | NA | NA |
| Gm13941 | 0 NA | NA | NA | NA | NA |
| Gm13961 | 0 NA | NA | NA | NA | NA |



|         |      |    |    |    |    |
|---------|------|----|----|----|----|
| Gm13967 | 0 NA | NA | NA | NA | NA |
| Gm13973 | 0 NA | NA | NA | NA | NA |
| Gm13975 | 0 NA | NA | NA | NA | NA |
| Gm13992 | 0 NA | NA | NA | NA | NA |
| Gm13996 | 0 NA | NA | NA | NA | NA |
| Gm13998 | 0 NA | NA | NA | NA | NA |
| Gm14006 | 0 NA | NA | NA | NA | NA |
| Gm14007 | 0 NA | NA | NA | NA | NA |
| Gm1401  | 0 NA | NA | NA | NA | NA |
| Gm14013 | 0 NA | NA | NA | NA | NA |
| Gm14018 | 0 NA | NA | NA | NA | NA |
| Gm14020 | 0 NA | NA | NA | NA | NA |
| Gm14021 | 0 NA | NA | NA | NA | NA |
| Gm14028 | 0 NA | NA | NA | NA | NA |
| Gm14035 | 0 NA | NA | NA | NA | NA |
| Gm14036 | 0 NA | NA | NA | NA | NA |
| Gm14037 | 0 NA | NA | NA | NA | NA |
| Gm14038 | 0 NA | NA | NA | NA | NA |
| Gm14039 | 0 NA | NA | NA | NA | NA |
| Gm14042 | 0 NA | NA | NA | NA | NA |
| Gm14044 | 0 NA | NA | NA | NA | NA |
| Gm14050 | 0 NA | NA | NA | NA | NA |
| Gm14052 | 0 NA | NA | NA | NA | NA |
| Gm14054 | 0 NA | NA | NA | NA | NA |
| Gm14056 | 0 NA | NA | NA | NA | NA |
| Gm14058 | 0 NA | NA | NA | NA | NA |
| Gm14065 | 0 NA | NA | NA | NA | NA |
| Gm14067 | 0 NA | NA | NA | NA | NA |
| Gm14069 | 0 NA | NA | NA | NA | NA |
| Gm14070 | 0 NA | NA | NA | NA | NA |
| Gm14071 | 0 NA | NA | NA | NA | NA |
| Gm14073 | 0 NA | NA | NA | NA | NA |
| Gm14082 | 0 NA | NA | NA | NA | NA |
| Gm14083 | 0 NA | NA | NA | NA | NA |
| Gm14086 | 0 NA | NA | NA | NA | NA |
| Gm14094 | 0 NA | NA | NA | NA | NA |
| Gm14098 | 0 NA | NA | NA | NA | NA |
| Gm14101 | 0 NA | NA | NA | NA | NA |
| Gm14103 | 0 NA | NA | NA | NA | NA |
| Gm14106 | 0 NA | NA | NA | NA | NA |
| Gm14107 | 0 NA | NA | NA | NA | NA |
| Gm14113 | 0 NA | NA | NA | NA | NA |
| Gm14115 | 0 NA | NA | NA | NA | NA |
| Gm14116 | 0 NA | NA | NA | NA | NA |
| Gm14119 | 0 NA | NA | NA | NA | NA |
| Gm14121 | 0 NA | NA | NA | NA | NA |
| Gm14125 | 0 NA | NA | NA | NA | NA |
| Gm14126 | 0 NA | NA | NA | NA | NA |
| Gm14127 | 0 NA | NA | NA | NA | NA |
| Gm14128 | 0 NA | NA | NA | NA | NA |
| Gm14129 | 0 NA | NA | NA | NA | NA |
| Gm14130 | 0 NA | NA | NA | NA | NA |
| Gm14131 | 0 NA | NA | NA | NA | NA |
| Gm14132 | 0 NA | NA | NA | NA | NA |
| Gm14140 | 0 NA | NA | NA | NA | NA |
| Gm14141 | 0 NA | NA | NA | NA | NA |
| Gm14147 | 0 NA | NA | NA | NA | NA |
| Gm14151 | 0 NA | NA | NA | NA | NA |
| Gm14153 | 0 NA | NA | NA | NA | NA |
| Gm14156 | 0 NA | NA | NA | NA | NA |
| Gm14158 | 0 NA | NA | NA | NA | NA |
| Gm14159 | 0 NA | NA | NA | NA | NA |
| Gm14162 | 0 NA | NA | NA | NA | NA |
| Gm14163 | 0 NA | NA | NA | NA | NA |
| Gm14172 | 0 NA | NA | NA | NA | NA |
| Gm14175 | 0 NA | NA | NA | NA | NA |

|         |      |    |    |    |    |
|---------|------|----|----|----|----|
| Gm14176 | 0 NA | NA | NA | NA | NA |
| Gm14180 | 0 NA | NA | NA | NA | NA |
| Gm14182 | 0 NA | NA | NA | NA | NA |
| Gm14186 | 0 NA | NA | NA | NA | NA |
| Gm14188 | 0 NA | NA | NA | NA | NA |
| Gm14190 | 0 NA | NA | NA | NA | NA |
| Gm14193 | 0 NA | NA | NA | NA | NA |
| Gm14200 | 0 NA | NA | NA | NA | NA |
| Gm14201 | 0 NA | NA | NA | NA | NA |
| Gm14202 | 0 NA | NA | NA | NA | NA |
| Gm14212 | 0 NA | NA | NA | NA | NA |
| Gm14213 | 0 NA | NA | NA | NA | NA |
| Gm14214 | 0 NA | NA | NA | NA | NA |
| Gm14215 | 0 NA | NA | NA | NA | NA |
| Gm14220 | 0 NA | NA | NA | NA | NA |
| Gm14229 | 0 NA | NA | NA | NA | NA |
| Gm14231 | 0 NA | NA | NA | NA | NA |
| Gm14234 | 0 NA | NA | NA | NA | NA |
| Gm14237 | 0 NA | NA | NA | NA | NA |
| Gm14238 | 0 NA | NA | NA | NA | NA |
| Gm14240 | 0 NA | NA | NA | NA | NA |
| Gm14247 | 0 NA | NA | NA | NA | NA |
| Gm14248 | 0 NA | NA | NA | NA | NA |
| Gm14253 | 0 NA | NA | NA | NA | NA |
| Gm14263 | 0 NA | NA | NA | NA | NA |
| Gm14274 | 0 NA | NA | NA | NA | NA |
| Gm14281 | 0 NA | NA | NA | NA | NA |
| Gm14282 | 0 NA | NA | NA | NA | NA |
| Gm14283 | 0 NA | NA | NA | NA | NA |
| Gm14287 | 0 NA | NA | NA | NA | NA |
| Gm14294 | 0 NA | NA | NA | NA | NA |
| Gm14297 | 0 NA | NA | NA | NA | NA |
| Gm14298 | 0 NA | NA | NA | NA | NA |
| Gm14299 | 0 NA | NA | NA | NA | NA |
| Gm14301 | 0 NA | NA | NA | NA | NA |
| Gm14304 | 0 NA | NA | NA | NA | NA |
| Gm14307 | 0 NA | NA | NA | NA | NA |
| Gm14314 | 0 NA | NA | NA | NA | NA |
| Gm14328 | 0 NA | NA | NA | NA | NA |
| Gm14331 | 0 NA | NA | NA | NA | NA |
| Gm14332 | 0 NA | NA | NA | NA | NA |
| Gm14333 | 0 NA | NA | NA | NA | NA |
| Gm14334 | 0 NA | NA | NA | NA | NA |
| Gm14348 | 0 NA | NA | NA | NA | NA |
| Gm14349 | 0 NA | NA | NA | NA | NA |
| Gm14350 | 0 NA | NA | NA | NA | NA |
| Gm14352 | 0 NA | NA | NA | NA | NA |
| Gm14353 | 0 NA | NA | NA | NA | NA |
| Gm14355 | 0 NA | NA | NA | NA | NA |
| Gm14356 | 0 NA | NA | NA | NA | NA |
| Gm14357 | 0 NA | NA | NA | NA | NA |
| Gm14358 | 0 NA | NA | NA | NA | NA |
| Gm14359 | 0 NA | NA | NA | NA | NA |
| Gm14360 | 0 NA | NA | NA | NA | NA |
| Gm14361 | 0 NA | NA | NA | NA | NA |
| Gm14362 | 0 NA | NA | NA | NA | NA |
| Gm14363 | 0 NA | NA | NA | NA | NA |
| Gm14364 | 0 NA | NA | NA | NA | NA |
| Gm14365 | 0 NA | NA | NA | NA | NA |
| Gm14366 | 0 NA | NA | NA | NA | NA |
| Gm14367 | 0 NA | NA | NA | NA | NA |
| Gm14368 | 0 NA | NA | NA | NA | NA |
| Gm14369 | 0 NA | NA | NA | NA | NA |
| Gm14370 | 0 NA | NA | NA | NA | NA |
| Gm14375 | 0 NA | NA | NA | NA | NA |
| Gm14380 | 0 NA | NA | NA | NA | NA |

|         |      |    |    |    |    |
|---------|------|----|----|----|----|
| Gm14381 | 0 NA | NA | NA | NA | NA |
| Gm14383 | 0 NA | NA | NA | NA | NA |
| Gm14385 | 0 NA | NA | NA | NA | NA |
| Gm14388 | 0 NA | NA | NA | NA | NA |
| Gm14390 | 0 NA | NA | NA | NA | NA |
| Gm14394 | 0 NA | NA | NA | NA | NA |
| Gm14395 | 0 NA | NA | NA | NA | NA |
| Gm14400 | 0 NA | NA | NA | NA | NA |
| Gm14402 | 0 NA | NA | NA | NA | NA |
| Gm14404 | 0 NA | NA | NA | NA | NA |
| Gm14405 | 0 NA | NA | NA | NA | NA |
| Gm14407 | 0 NA | NA | NA | NA | NA |
| Gm14408 | 0 NA | NA | NA | NA | NA |
| Gm14413 | 0 NA | NA | NA | NA | NA |
| Gm14417 | 0 NA | NA | NA | NA | NA |
| Gm14427 | 0 NA | NA | NA | NA | NA |
| Gm14428 | 0 NA | NA | NA | NA | NA |
| Gm14438 | 0 NA | NA | NA | NA | NA |
| Gm14439 | 0 NA | NA | NA | NA | NA |
| Gm14450 | 0 NA | NA | NA | NA | NA |
| Gm14451 | 0 NA | NA | NA | NA | NA |
| Gm14452 | 0 NA | NA | NA | NA | NA |
| Gm14457 | 0 NA | NA | NA | NA | NA |
| Gm14459 | 0 NA | NA | NA | NA | NA |
| Gm14460 | 0 NA | NA | NA | NA | NA |
| Gm14463 | 0 NA | NA | NA | NA | NA |
| Gm14464 | 0 NA | NA | NA | NA | NA |
| Gm14465 | 0 NA | NA | NA | NA | NA |
| Gm14466 | 0 NA | NA | NA | NA | NA |
| Gm14470 | 0 NA | NA | NA | NA | NA |
| Gm14472 | 0 NA | NA | NA | NA | NA |
| Gm14473 | 0 NA | NA | NA | NA | NA |
| Gm14481 | 0 NA | NA | NA | NA | NA |
| Gm14485 | 0 NA | NA | NA | NA | NA |
| Gm14489 | 0 NA | NA | NA | NA | NA |
| Gm14491 | 0 NA | NA | NA | NA | NA |
| Gm14496 | 0 NA | NA | NA | NA | NA |
| Gm14497 | 0 NA | NA | NA | NA | NA |
| Gm14500 | 0 NA | NA | NA | NA | NA |
| Gm14503 | 0 NA | NA | NA | NA | NA |
| Gm14504 | 0 NA | NA | NA | NA | NA |
| Gm14506 | 0 NA | NA | NA | NA | NA |
| Gm14509 | 0 NA | NA | NA | NA | NA |
| Gm14510 | 0 NA | NA | NA | NA | NA |
| Gm14512 | 0 NA | NA | NA | NA | NA |
| Gm14513 | 0 NA | NA | NA | NA | NA |
| Gm14514 | 0 NA | NA | NA | NA | NA |
| Gm14515 | 0 NA | NA | NA | NA | NA |
| Gm14516 | 0 NA | NA | NA | NA | NA |
| Gm14517 | 0 NA | NA | NA | NA | NA |
| Gm14518 | 0 NA | NA | NA | NA | NA |
| Gm14519 | 0 NA | NA | NA | NA | NA |
| Gm14520 | 0 NA | NA | NA | NA | NA |
| Gm14521 | 0 NA | NA | NA | NA | NA |
| Gm14524 | 0 NA | NA | NA | NA | NA |
| Gm14525 | 0 NA | NA | NA | NA | NA |
| Gm14527 | 0 NA | NA | NA | NA | NA |
| Gm14528 | 0 NA | NA | NA | NA | NA |
| Gm14529 | 0 NA | NA | NA | NA | NA |
| Gm14530 | 0 NA | NA | NA | NA | NA |
| Gm14531 | 0 NA | NA | NA | NA | NA |
| Gm14533 | 0 NA | NA | NA | NA | NA |
| Gm14534 | 0 NA | NA | NA | NA | NA |
| Gm14539 | 0 NA | NA | NA | NA | NA |
| Gm14550 | 0 NA | NA | NA | NA | NA |
| Gm14551 | 0 NA | NA | NA | NA | NA |

|         |      |    |    |    |    |
|---------|------|----|----|----|----|
| Gm14558 | 0 NA | NA | NA | NA | NA |
| Gm14559 | 0 NA | NA | NA | NA | NA |
| Gm14560 | 0 NA | NA | NA | NA | NA |
| Gm14561 | 0 NA | NA | NA | NA | NA |
| Gm14563 | 0 NA | NA | NA | NA | NA |
| Gm14564 | 0 NA | NA | NA | NA | NA |
| Gm14566 | 0 NA | NA | NA | NA | NA |
| Gm14568 | 0 NA | NA | NA | NA | NA |
| Gm14570 | 0 NA | NA | NA | NA | NA |
| Gm14571 | 0 NA | NA | NA | NA | NA |
| Gm14574 | 0 NA | NA | NA | NA | NA |
| Gm14575 | 0 NA | NA | NA | NA | NA |
| Gm14576 | 0 NA | NA | NA | NA | NA |
| Gm14577 | 0 NA | NA | NA | NA | NA |
| Gm14578 | 0 NA | NA | NA | NA | NA |
| Gm14579 | 0 NA | NA | NA | NA | NA |
| Gm14581 | 0 NA | NA | NA | NA | NA |
| Gm14587 | 0 NA | NA | NA | NA | NA |
| Gm14588 | 0 NA | NA | NA | NA | NA |
| Gm14589 | 0 NA | NA | NA | NA | NA |
| Gm14590 | 0 NA | NA | NA | NA | NA |
| Gm14591 | 0 NA | NA | NA | NA | NA |
| Gm14592 | 0 NA | NA | NA | NA | NA |
| Gm14593 | 0 NA | NA | NA | NA | NA |
| Gm14594 | 0 NA | NA | NA | NA | NA |
| Gm14595 | 0 NA | NA | NA | NA | NA |
| Gm14596 | 0 NA | NA | NA | NA | NA |
| Gm14597 | 0 NA | NA | NA | NA | NA |
| Gm14598 | 0 NA | NA | NA | NA | NA |
| Gm14600 | 0 NA | NA | NA | NA | NA |
| Gm14601 | 0 NA | NA | NA | NA | NA |
| Gm14602 | 0 NA | NA | NA | NA | NA |
| Gm14605 | 0 NA | NA | NA | NA | NA |
| Gm14606 | 0 NA | NA | NA | NA | NA |
| Gm14607 | 0 NA | NA | NA | NA | NA |
| Gm14608 | 0 NA | NA | NA | NA | NA |
| Gm14609 | 0 NA | NA | NA | NA | NA |
| Gm14613 | 0 NA | NA | NA | NA | NA |
| Gm14614 | 0 NA | NA | NA | NA | NA |
| Gm14615 | 0 NA | NA | NA | NA | NA |
| Gm14619 | 0 NA | NA | NA | NA | NA |
| Gm14620 | 0 NA | NA | NA | NA | NA |
| Gm14621 | 0 NA | NA | NA | NA | NA |
| Gm14622 | 0 NA | NA | NA | NA | NA |
| Gm14623 | 0 NA | NA | NA | NA | NA |
| Gm14624 | 0 NA | NA | NA | NA | NA |
| Gm14625 | 0 NA | NA | NA | NA | NA |
| Gm14626 | 0 NA | NA | NA | NA | NA |
| Gm14627 | 0 NA | NA | NA | NA | NA |
| Gm14628 | 0 NA | NA | NA | NA | NA |
| Gm14629 | 0 NA | NA | NA | NA | NA |
| Gm14630 | 0 NA | NA | NA | NA | NA |
| Gm14632 | 0 NA | NA | NA | NA | NA |
| Gm14638 | 0 NA | NA | NA | NA | NA |
| Gm14639 | 0 NA | NA | NA | NA | NA |
| Gm14644 | 0 NA | NA | NA | NA | NA |
| Gm14645 | 0 NA | NA | NA | NA | NA |
| Gm14647 | 0 NA | NA | NA | NA | NA |
| Gm14649 | 0 NA | NA | NA | NA | NA |
| Gm14651 | 0 NA | NA | NA | NA | NA |
| Gm14652 | 0 NA | NA | NA | NA | NA |
| Gm14655 | 0 NA | NA | NA | NA | NA |
| Gm14656 | 0 NA | NA | NA | NA | NA |
| Gm14657 | 0 NA | NA | NA | NA | NA |
| Gm14660 | 0 NA | NA | NA | NA | NA |
| Gm14663 | 0 NA | NA | NA | NA | NA |

|         |      |    |    |    |    |
|---------|------|----|----|----|----|
| Gm14665 | 0 NA | NA | NA | NA | NA |
| Gm14666 | 0 NA | NA | NA | NA | NA |
| Gm14668 | 0 NA | NA | NA | NA | NA |
| Gm14669 | 0 NA | NA | NA | NA | NA |
| Gm14670 | 0 NA | NA | NA | NA | NA |
| Gm14671 | 0 NA | NA | NA | NA | NA |
| Gm14673 | 0 NA | NA | NA | NA | NA |
| Gm14674 | 0 NA | NA | NA | NA | NA |
| Gm14676 | 0 NA | NA | NA | NA | NA |
| Gm14677 | 0 NA | NA | NA | NA | NA |
| Gm14678 | 0 NA | NA | NA | NA | NA |
| Gm14688 | 0 NA | NA | NA | NA | NA |
| Gm14692 | 0 NA | NA | NA | NA | NA |
| Gm14694 | 0 NA | NA | NA | NA | NA |
| Gm14695 | 0 NA | NA | NA | NA | NA |
| Gm14699 | 0 NA | NA | NA | NA | NA |
| Gm14701 | 0 NA | NA | NA | NA | NA |
| Gm14704 | 0 NA | NA | NA | NA | NA |
| Gm14706 | 0 NA | NA | NA | NA | NA |
| Gm14709 | 0 NA | NA | NA | NA | NA |
| Gm14710 | 0 NA | NA | NA | NA | NA |
| Gm14711 | 0 NA | NA | NA | NA | NA |
| Gm14712 | 0 NA | NA | NA | NA | NA |
| Gm14713 | 0 NA | NA | NA | NA | NA |
| Gm14714 | 0 NA | NA | NA | NA | NA |
| Gm14716 | 0 NA | NA | NA | NA | NA |
| Gm14719 | 0 NA | NA | NA | NA | NA |
| Gm14721 | 0 NA | NA | NA | NA | NA |
| Gm14722 | 0 NA | NA | NA | NA | NA |
| Gm14723 | 0 NA | NA | NA | NA | NA |
| Gm14724 | 0 NA | NA | NA | NA | NA |
| Gm14725 | 0 NA | NA | NA | NA | NA |
| Gm14726 | 0 NA | NA | NA | NA | NA |
| Gm14727 | 0 NA | NA | NA | NA | NA |
| Gm14728 | 0 NA | NA | NA | NA | NA |
| Gm14729 | 0 NA | NA | NA | NA | NA |
| Gm14731 | 0 NA | NA | NA | NA | NA |
| Gm14733 | 0 NA | NA | NA | NA | NA |
| Gm14736 | 0 NA | NA | NA | NA | NA |
| Gm14739 | 0 NA | NA | NA | NA | NA |
| Gm14743 | 0 NA | NA | NA | NA | NA |
| Gm14744 | 0 NA | NA | NA | NA | NA |
| Gm14745 | 0 NA | NA | NA | NA | NA |
| Gm14746 | 0 NA | NA | NA | NA | NA |
| Gm14748 | 0 NA | NA | NA | NA | NA |
| Gm14750 | 0 NA | NA | NA | NA | NA |
| Gm14751 | 0 NA | NA | NA | NA | NA |
| Gm14753 | 0 NA | NA | NA | NA | NA |
| Gm14754 | 0 NA | NA | NA | NA | NA |
| Gm14755 | 0 NA | NA | NA | NA | NA |
| Gm14758 | 0 NA | NA | NA | NA | NA |
| Gm14761 | 0 NA | NA | NA | NA | NA |
| Gm14765 | 0 NA | NA | NA | NA | NA |
| Gm14767 | 0 NA | NA | NA | NA | NA |
| Gm14768 | 0 NA | NA | NA | NA | NA |
| Gm14769 | 0 NA | NA | NA | NA | NA |
| Gm14770 | 0 NA | NA | NA | NA | NA |
| Gm14771 | 0 NA | NA | NA | NA | NA |
| Gm14772 | 0 NA | NA | NA | NA | NA |
| Gm14774 | 0 NA | NA | NA | NA | NA |
| Gm14775 | 0 NA | NA | NA | NA | NA |
| Gm14777 | 0 NA | NA | NA | NA | NA |
| Gm14780 | 0 NA | NA | NA | NA | NA |
| Gm14781 | 0 NA | NA | NA | NA | NA |
| Gm14782 | 0 NA | NA | NA | NA | NA |
| Gm14783 | 0 NA | NA | NA | NA | NA |

|         |      |    |    |    |    |
|---------|------|----|----|----|----|
| Gm14784 | 0 NA | NA | NA | NA | NA |
| Gm14785 | 0 NA | NA | NA | NA | NA |
| Gm14786 | 0 NA | NA | NA | NA | NA |
| Gm14787 | 0 NA | NA | NA | NA | NA |
| Gm14788 | 0 NA | NA | NA | NA | NA |
| Gm14790 | 0 NA | NA | NA | NA | NA |
| Gm14792 | 0 NA | NA | NA | NA | NA |
| Gm14793 | 0 NA | NA | NA | NA | NA |
| Gm14794 | 0 NA | NA | NA | NA | NA |
| Gm14795 | 0 NA | NA | NA | NA | NA |
| Gm14796 | 0 NA | NA | NA | NA | NA |
| Gm14797 | 0 NA | NA | NA | NA | NA |
| Gm14799 | 0 NA | NA | NA | NA | NA |
| Gm14800 | 0 NA | NA | NA | NA | NA |
| Gm14802 | 0 NA | NA | NA | NA | NA |
| Gm14803 | 0 NA | NA | NA | NA | NA |
| Gm14804 | 0 NA | NA | NA | NA | NA |
| Gm14805 | 0 NA | NA | NA | NA | NA |
| Gm14811 | 0 NA | NA | NA | NA | NA |
| Gm14815 | 0 NA | NA | NA | NA | NA |
| Gm14816 | 0 NA | NA | NA | NA | NA |
| Gm14819 | 0 NA | NA | NA | NA | NA |
| Gm14821 | 0 NA | NA | NA | NA | NA |
| Gm14823 | 0 NA | NA | NA | NA | NA |
| Gm14824 | 0 NA | NA | NA | NA | NA |
| Gm14825 | 0 NA | NA | NA | NA | NA |
| Gm14826 | 0 NA | NA | NA | NA | NA |
| Gm14831 | 0 NA | NA | NA | NA | NA |
| Gm14833 | 0 NA | NA | NA | NA | NA |
| Gm14834 | 0 NA | NA | NA | NA | NA |
| Gm14835 | 0 NA | NA | NA | NA | NA |
| Gm14836 | 0 NA | NA | NA | NA | NA |
| Gm14837 | 0 NA | NA | NA | NA | NA |
| Gm14838 | 0 NA | NA | NA | NA | NA |
| Gm14839 | 0 NA | NA | NA | NA | NA |
| Gm14840 | 0 NA | NA | NA | NA | NA |
| Gm14841 | 0 NA | NA | NA | NA | NA |
| Gm14842 | 0 NA | NA | NA | NA | NA |
| Gm14845 | 0 NA | NA | NA | NA | NA |
| Gm14846 | 0 NA | NA | NA | NA | NA |
| Gm14847 | 0 NA | NA | NA | NA | NA |
| Gm14848 | 0 NA | NA | NA | NA | NA |
| Gm14852 | 0 NA | NA | NA | NA | NA |
| Gm14854 | 0 NA | NA | NA | NA | NA |
| Gm14855 | 0 NA | NA | NA | NA | NA |
| Gm14856 | 0 NA | NA | NA | NA | NA |
| Gm14859 | 0 NA | NA | NA | NA | NA |
| Gm14861 | 0 NA | NA | NA | NA | NA |
| Gm14864 | 0 NA | NA | NA | NA | NA |
| Gm14865 | 0 NA | NA | NA | NA | NA |
| Gm14867 | 0 NA | NA | NA | NA | NA |
| Gm14868 | 0 NA | NA | NA | NA | NA |
| Gm14869 | 0 NA | NA | NA | NA | NA |
| Gm14871 | 0 NA | NA | NA | NA | NA |
| Gm14875 | 0 NA | NA | NA | NA | NA |
| Gm14876 | 0 NA | NA | NA | NA | NA |
| Gm14877 | 0 NA | NA | NA | NA | NA |
| Gm14878 | 0 NA | NA | NA | NA | NA |
| Gm14879 | 0 NA | NA | NA | NA | NA |
| Gm14880 | 0 NA | NA | NA | NA | NA |
| Gm14881 | 0 NA | NA | NA | NA | NA |
| Gm14882 | 0 NA | NA | NA | NA | NA |
| Gm14883 | 0 NA | NA | NA | NA | NA |
| Gm14884 | 0 NA | NA | NA | NA | NA |
| Gm14885 | 0 NA | NA | NA | NA | NA |
| Gm14887 | 0 NA | NA | NA | NA | NA |

|         |      |    |    |    |    |
|---------|------|----|----|----|----|
| Gm14890 | 0 NA | NA | NA | NA | NA |
| Gm14893 | 0 NA | NA | NA | NA | NA |
| Gm14894 | 0 NA | NA | NA | NA | NA |
| Gm14895 | 0 NA | NA | NA | NA | NA |
| Gm14896 | 0 NA | NA | NA | NA | NA |
| Gm14897 | 0 NA | NA | NA | NA | NA |
| Gm14898 | 0 NA | NA | NA | NA | NA |
| Gm14899 | 0 NA | NA | NA | NA | NA |
| Gm14901 | 0 NA | NA | NA | NA | NA |
| Gm14904 | 0 NA | NA | NA | NA | NA |
| Gm14905 | 0 NA | NA | NA | NA | NA |
| Gm14906 | 0 NA | NA | NA | NA | NA |
| Gm14907 | 0 NA | NA | NA | NA | NA |
| Gm14908 | 0 NA | NA | NA | NA | NA |
| Gm14909 | 0 NA | NA | NA | NA | NA |
| Gm14910 | 0 NA | NA | NA | NA | NA |
| Gm14911 | 0 NA | NA | NA | NA | NA |
| Gm14913 | 0 NA | NA | NA | NA | NA |
| Gm14916 | 0 NA | NA | NA | NA | NA |
| Gm14918 | 0 NA | NA | NA | NA | NA |
| Gm14919 | 0 NA | NA | NA | NA | NA |
| Gm14921 | 0 NA | NA | NA | NA | NA |
| Gm14922 | 0 NA | NA | NA | NA | NA |
| Gm14923 | 0 NA | NA | NA | NA | NA |
| Gm14925 | 0 NA | NA | NA | NA | NA |
| Gm14926 | 0 NA | NA | NA | NA | NA |
| Gm14930 | 0 NA | NA | NA | NA | NA |
| Gm14931 | 0 NA | NA | NA | NA | NA |
| Gm14932 | 0 NA | NA | NA | NA | NA |
| Gm14933 | 0 NA | NA | NA | NA | NA |
| Gm14937 | 0 NA | NA | NA | NA | NA |
| Gm14938 | 0 NA | NA | NA | NA | NA |
| Gm14940 | 0 NA | NA | NA | NA | NA |
| Gm14942 | 0 NA | NA | NA | NA | NA |
| Gm14943 | 0 NA | NA | NA | NA | NA |
| Gm14945 | 0 NA | NA | NA | NA | NA |
| Gm14946 | 0 NA | NA | NA | NA | NA |
| Gm14947 | 0 NA | NA | NA | NA | NA |
| Gm14957 | 0 NA | NA | NA | NA | NA |
| Gm14971 | 0 NA | NA | NA | NA | NA |
| Gm14972 | 0 NA | NA | NA | NA | NA |
| Gm14973 | 0 NA | NA | NA | NA | NA |
| Gm14975 | 0 NA | NA | NA | NA | NA |
| Gm14976 | 0 NA | NA | NA | NA | NA |
| Gm14977 | 0 NA | NA | NA | NA | NA |
| Gm14979 | 0 NA | NA | NA | NA | NA |
| Gm14980 | 0 NA | NA | NA | NA | NA |
| Gm14981 | 0 NA | NA | NA | NA | NA |
| Gm14982 | 0 NA | NA | NA | NA | NA |
| Gm14983 | 0 NA | NA | NA | NA | NA |
| Gm14985 | 0 NA | NA | NA | NA | NA |
| Gm14986 | 0 NA | NA | NA | NA | NA |
| Gm14987 | 0 NA | NA | NA | NA | NA |
| Gm14988 | 0 NA | NA | NA | NA | NA |
| Gm14989 | 0 NA | NA | NA | NA | NA |
| Gm14990 | 0 NA | NA | NA | NA | NA |
| Gm14991 | 0 NA | NA | NA | NA | NA |
| Gm14992 | 0 NA | NA | NA | NA | NA |
| Gm14993 | 0 NA | NA | NA | NA | NA |
| Gm14994 | 0 NA | NA | NA | NA | NA |
| Gm14995 | 0 NA | NA | NA | NA | NA |
| Gm14996 | 0 NA | NA | NA | NA | NA |
| Gm14997 | 0 NA | NA | NA | NA | NA |
| Gm14998 | 0 NA | NA | NA | NA | NA |
| Gm14999 | 0 NA | NA | NA | NA | NA |
| Gm15000 | 0 NA | NA | NA | NA | NA |

|         |      |    |    |    |    |
|---------|------|----|----|----|----|
| Gm15001 | 0 NA | NA | NA | NA | NA |
| Gm15002 | 0 NA | NA | NA | NA | NA |
| Gm15003 | 0 NA | NA | NA | NA | NA |
| Gm15004 | 0 NA | NA | NA | NA | NA |
| Gm15005 | 0 NA | NA | NA | NA | NA |
| Gm15006 | 0 NA | NA | NA | NA | NA |
| Gm15007 | 0 NA | NA | NA | NA | NA |
| Gm15012 | 0 NA | NA | NA | NA | NA |
| Gm15018 | 0 NA | NA | NA | NA | NA |
| Gm15019 | 0 NA | NA | NA | NA | NA |
| Gm15021 | 0 NA | NA | NA | NA | NA |
| Gm15022 | 0 NA | NA | NA | NA | NA |
| Gm15023 | 0 NA | NA | NA | NA | NA |
| Gm15025 | 0 NA | NA | NA | NA | NA |
| Gm15028 | 0 NA | NA | NA | NA | NA |
| Gm15029 | 0 NA | NA | NA | NA | NA |
| Gm15030 | 0 NA | NA | NA | NA | NA |
| Gm15031 | 0 NA | NA | NA | NA | NA |
| Gm15032 | 0 NA | NA | NA | NA | NA |
| Gm15033 | 0 NA | NA | NA | NA | NA |
| Gm15034 | 0 NA | NA | NA | NA | NA |
| Gm15036 | 0 NA | NA | NA | NA | NA |
| Gm15037 | 0 NA | NA | NA | NA | NA |
| Gm15038 | 0 NA | NA | NA | NA | NA |
| Gm15040 | 0 NA | NA | NA | NA | NA |
| Gm15044 | 0 NA | NA | NA | NA | NA |
| Gm15047 | 0 NA | NA | NA | NA | NA |
| Gm15048 | 0 NA | NA | NA | NA | NA |
| Gm15049 | 0 NA | NA | NA | NA | NA |
| Gm15054 | 0 NA | NA | NA | NA | NA |
| Gm15056 | 0 NA | NA | NA | NA | NA |
| Gm15058 | 0 NA | NA | NA | NA | NA |
| Gm15060 | 0 NA | NA | NA | NA | NA |
| Gm15061 | 0 NA | NA | NA | NA | NA |
| Gm15062 | 0 NA | NA | NA | NA | NA |
| Gm15065 | 0 NA | NA | NA | NA | NA |
| Gm15073 | 0 NA | NA | NA | NA | NA |
| Gm15075 | 0 NA | NA | NA | NA | NA |
| Gm15077 | 0 NA | NA | NA | NA | NA |
| Gm15078 | 0 NA | NA | NA | NA | NA |
| Gm15080 | 0 NA | NA | NA | NA | NA |
| Gm15081 | 0 NA | NA | NA | NA | NA |
| Gm15084 | 0 NA | NA | NA | NA | NA |
| Gm15085 | 0 NA | NA | NA | NA | NA |
| Gm15088 | 0 NA | NA | NA | NA | NA |
| Gm15089 | 0 NA | NA | NA | NA | NA |
| Gm15090 | 0 NA | NA | NA | NA | NA |
| Gm15091 | 0 NA | NA | NA | NA | NA |
| Gm15093 | 0 NA | NA | NA | NA | NA |
| Gm15094 | 0 NA | NA | NA | NA | NA |
| Gm15095 | 0 NA | NA | NA | NA | NA |
| Gm15096 | 0 NA | NA | NA | NA | NA |
| Gm15097 | 0 NA | NA | NA | NA | NA |
| Gm15098 | 0 NA | NA | NA | NA | NA |
| Gm15101 | 0 NA | NA | NA | NA | NA |
| Gm15102 | 0 NA | NA | NA | NA | NA |
| Gm15103 | 0 NA | NA | NA | NA | NA |
| Gm15105 | 0 NA | NA | NA | NA | NA |
| Gm15106 | 0 NA | NA | NA | NA | NA |
| Gm15107 | 0 NA | NA | NA | NA | NA |
| Gm15108 | 0 NA | NA | NA | NA | NA |
| Gm15109 | 0 NA | NA | NA | NA | NA |
| Gm15110 | 0 NA | NA | NA | NA | NA |
| Gm15111 | 0 NA | NA | NA | NA | NA |
| Gm15112 | 0 NA | NA | NA | NA | NA |
| Gm15113 | 0 NA | NA | NA | NA | NA |



|         |      |    |    |    |    |
|---------|------|----|----|----|----|
| Gm15114 | 0 NA | NA | NA | NA | NA |
| Gm15115 | 0 NA | NA | NA | NA | NA |
| Gm15116 | 0 NA | NA | NA | NA | NA |
| Gm15120 | 0 NA | NA | NA | NA | NA |
| Gm15125 | 0 NA | NA | NA | NA | NA |
| Gm15126 | 0 NA | NA | NA | NA | NA |
| Gm15127 | 0 NA | NA | NA | NA | NA |
| Gm15128 | 0 NA | NA | NA | NA | NA |
| Gm15129 | 0 NA | NA | NA | NA | NA |
| Gm15130 | 0 NA | NA | NA | NA | NA |
| Gm15131 | 0 NA | NA | NA | NA | NA |
| Gm15136 | 0 NA | NA | NA | NA | NA |
| Gm15141 | 0 NA | NA | NA | NA | NA |
| Gm15142 | 0 NA | NA | NA | NA | NA |
| Gm15143 | 0 NA | NA | NA | NA | NA |
| Gm15147 | 0 NA | NA | NA | NA | NA |
| Gm15148 | 0 NA | NA | NA | NA | NA |
| Gm15149 | 0 NA | NA | NA | NA | NA |
| Gm15151 | 0 NA | NA | NA | NA | NA |
| Gm15152 | 0 NA | NA | NA | NA | NA |
| Gm15154 | 0 NA | NA | NA | NA | NA |
| Gm15155 | 0 NA | NA | NA | NA | NA |
| Gm15158 | 0 NA | NA | NA | NA | NA |
| Gm15160 | 0 NA | NA | NA | NA | NA |
| Gm15161 | 0 NA | NA | NA | NA | NA |
| Gm15162 | 0 NA | NA | NA | NA | NA |
| Gm15164 | 0 NA | NA | NA | NA | NA |
| Gm15165 | 0 NA | NA | NA | NA | NA |
| Gm15166 | 0 NA | NA | NA | NA | NA |
| Gm15167 | 0 NA | NA | NA | NA | NA |
| Gm15170 | 0 NA | NA | NA | NA | NA |
| Gm15171 | 0 NA | NA | NA | NA | NA |
| Gm15172 | 0 NA | NA | NA | NA | NA |
| Gm15173 | 0 NA | NA | NA | NA | NA |
| Gm15175 | 0 NA | NA | NA | NA | NA |
| Gm15176 | 0 NA | NA | NA | NA | NA |
| Gm15177 | 0 NA | NA | NA | NA | NA |
| Gm15180 | 0 NA | NA | NA | NA | NA |
| Gm15181 | 0 NA | NA | NA | NA | NA |
| Gm15182 | 0 NA | NA | NA | NA | NA |
| Gm15183 | 0 NA | NA | NA | NA | NA |
| Gm15187 | 0 NA | NA | NA | NA | NA |
| Gm15188 | 0 NA | NA | NA | NA | NA |
| Gm15189 | 0 NA | NA | NA | NA | NA |
| Gm15190 | 0 NA | NA | NA | NA | NA |
| Gm15192 | 0 NA | NA | NA | NA | NA |
| Gm15193 | 0 NA | NA | NA | NA | NA |
| Gm15194 | 0 NA | NA | NA | NA | NA |
| Gm15196 | 0 NA | NA | NA | NA | NA |
| Gm15197 | 0 NA | NA | NA | NA | NA |
| Gm15203 | 0 NA | NA | NA | NA | NA |
| Gm15206 | 0 NA | NA | NA | NA | NA |
| Gm15207 | 0 NA | NA | NA | NA | NA |
| Gm15211 | 0 NA | NA | NA | NA | NA |
| Gm15212 | 0 NA | NA | NA | NA | NA |
| Gm15213 | 0 NA | NA | NA | NA | NA |
| Gm15214 | 0 NA | NA | NA | NA | NA |
| Gm15216 | 0 NA | NA | NA | NA | NA |
| Gm15217 | 0 NA | NA | NA | NA | NA |
| Gm15220 | 0 NA | NA | NA | NA | NA |
| Gm15223 | 0 NA | NA | NA | NA | NA |
| Gm15224 | 0 NA | NA | NA | NA | NA |
| Gm15225 | 0 NA | NA | NA | NA | NA |
| Gm15227 | 0 NA | NA | NA | NA | NA |
| Gm15229 | 0 NA | NA | NA | NA | NA |
| Gm15231 | 0 NA | NA | NA | NA | NA |

|         |      |    |    |    |    |
|---------|------|----|----|----|----|
| Gm15233 | 0 NA | NA | NA | NA | NA |
| Gm15235 | 0 NA | NA | NA | NA | NA |
| Gm15237 | 0 NA | NA | NA | NA | NA |
| Gm15238 | 0 NA | NA | NA | NA | NA |
| Gm15240 | 0 NA | NA | NA | NA | NA |
| Gm15242 | 0 NA | NA | NA | NA | NA |
| Gm15244 | 0 NA | NA | NA | NA | NA |
| Gm15251 | 0 NA | NA | NA | NA | NA |
| Gm15252 | 0 NA | NA | NA | NA | NA |
| Gm15254 | 0 NA | NA | NA | NA | NA |
| Gm15256 | 0 NA | NA | NA | NA | NA |
| Gm15257 | 0 NA | NA | NA | NA | NA |
| Gm15258 | 0 NA | NA | NA | NA | NA |
| Gm15259 | 0 NA | NA | NA | NA | NA |
| Gm15260 | 0 NA | NA | NA | NA | NA |
| Gm15262 | 0 NA | NA | NA | NA | NA |
| Gm15263 | 0 NA | NA | NA | NA | NA |
| Gm15266 | 0 NA | NA | NA | NA | NA |
| Gm1527  | 0 NA | NA | NA | NA | NA |
| Gm15272 | 0 NA | NA | NA | NA | NA |
| Gm15273 | 0 NA | NA | NA | NA | NA |
| Gm15274 | 0 NA | NA | NA | NA | NA |
| Gm15275 | 0 NA | NA | NA | NA | NA |
| Gm15279 | 0 NA | NA | NA | NA | NA |
| Gm15281 | 0 NA | NA | NA | NA | NA |
| Gm15282 | 0 NA | NA | NA | NA | NA |
| Gm15289 | 0 NA | NA | NA | NA | NA |
| Gm15294 | 0 NA | NA | NA | NA | NA |
| Gm15297 | 0 NA | NA | NA | NA | NA |
| Gm15300 | 0 NA | NA | NA | NA | NA |
| Gm15303 | 0 NA | NA | NA | NA | NA |
| Gm15305 | 0 NA | NA | NA | NA | NA |
| Gm15309 | 0 NA | NA | NA | NA | NA |
| Gm15310 | 0 NA | NA | NA | NA | NA |
| Gm15311 | 0 NA | NA | NA | NA | NA |
| Gm15312 | 0 NA | NA | NA | NA | NA |
| Gm15313 | 0 NA | NA | NA | NA | NA |
| Gm15316 | 0 NA | NA | NA | NA | NA |
| Gm15320 | 0 NA | NA | NA | NA | NA |
| Gm15321 | 0 NA | NA | NA | NA | NA |
| Gm15329 | 0 NA | NA | NA | NA | NA |
| Gm15332 | 0 NA | NA | NA | NA | NA |
| Gm15349 | 0 NA | NA | NA | NA | NA |
| Gm15352 | 0 NA | NA | NA | NA | NA |
| Gm15355 | 0 NA | NA | NA | NA | NA |
| Gm15357 | 0 NA | NA | NA | NA | NA |
| Gm15358 | 0 NA | NA | NA | NA | NA |
| Gm15361 | 0 NA | NA | NA | NA | NA |
| Gm15362 | 0 NA | NA | NA | NA | NA |
| Gm15363 | 0 NA | NA | NA | NA | NA |
| Gm15364 | 0 NA | NA | NA | NA | NA |
| Gm15365 | 0 NA | NA | NA | NA | NA |
| Gm15367 | 0 NA | NA | NA | NA | NA |
| Gm15377 | 0 NA | NA | NA | NA | NA |
| Gm15378 | 0 NA | NA | NA | NA | NA |
| Gm15381 | 0 NA | NA | NA | NA | NA |
| Gm15383 | 0 NA | NA | NA | NA | NA |
| Gm15388 | 0 NA | NA | NA | NA | NA |
| Gm15390 | 0 NA | NA | NA | NA | NA |
| Gm15394 | 0 NA | NA | NA | NA | NA |
| Gm15400 | 0 NA | NA | NA | NA | NA |
| Gm15403 | 0 NA | NA | NA | NA | NA |
| Gm15425 | 0 NA | NA | NA | NA | NA |
| Gm15426 | 0 NA | NA | NA | NA | NA |
| Gm15429 | 0 NA | NA | NA | NA | NA |
| Gm15432 | 0 NA | NA | NA | NA | NA |

|         |      |    |    |    |    |
|---------|------|----|----|----|----|
| Gm15442 | 0 NA | NA | NA | NA | NA |
| Gm15464 | 0 NA | NA | NA | NA | NA |
| Gm15465 | 0 NA | NA | NA | NA | NA |
| Gm15467 | 0 NA | NA | NA | NA | NA |
| Gm15476 | 0 NA | NA | NA | NA | NA |
| Gm15480 | 0 NA | NA | NA | NA | NA |
| Gm15488 | 0 NA | NA | NA | NA | NA |
| Gm15490 | 0 NA | NA | NA | NA | NA |
| Gm15493 | 0 NA | NA | NA | NA | NA |
| Gm15495 | 0 NA | NA | NA | NA | NA |
| Gm15497 | 0 NA | NA | NA | NA | NA |
| Gm15504 | 0 NA | NA | NA | NA | NA |
| Gm15508 | 0 NA | NA | NA | NA | NA |
| Gm15516 | 0 NA | NA | NA | NA | NA |
| Gm15519 | 0 NA | NA | NA | NA | NA |
| Gm15529 | 0 NA | NA | NA | NA | NA |
| Gm1553  | 0 NA | NA | NA | NA | NA |
| Gm15530 | 0 NA | NA | NA | NA | NA |
| Gm15531 | 0 NA | NA | NA | NA | NA |
| Gm15532 | 0 NA | NA | NA | NA | NA |
| Gm15534 | 0 NA | NA | NA | NA | NA |
| Gm15536 | 0 NA | NA | NA | NA | NA |
| Gm15546 | 0 NA | NA | NA | NA | NA |
| Gm15550 | 0 NA | NA | NA | NA | NA |
| Gm15553 | 0 NA | NA | NA | NA | NA |
| Gm15554 | 0 NA | NA | NA | NA | NA |
| Gm15557 | 0 NA | NA | NA | NA | NA |
| Gm15560 | 0 NA | NA | NA | NA | NA |
| Gm15566 | 0 NA | NA | NA | NA | NA |
| Gm15571 | 0 NA | NA | NA | NA | NA |
| Gm15572 | 0 NA | NA | NA | NA | NA |
| Gm15574 | 0 NA | NA | NA | NA | NA |
| Gm15576 | 0 NA | NA | NA | NA | NA |
| Gm15578 | 0 NA | NA | NA | NA | NA |
| Gm15580 | 0 NA | NA | NA | NA | NA |
| Gm15583 | 0 NA | NA | NA | NA | NA |
| Gm15586 | 0 NA | NA | NA | NA | NA |
| Gm15593 | 0 NA | NA | NA | NA | NA |
| Gm15596 | 0 NA | NA | NA | NA | NA |
| Gm15599 | 0 NA | NA | NA | NA | NA |
| Gm15613 | 0 NA | NA | NA | NA | NA |
| Gm15615 | 0 NA | NA | NA | NA | NA |
| Gm15617 | 0 NA | NA | NA | NA | NA |
| Gm15618 | 0 NA | NA | NA | NA | NA |
| Gm15620 | 0 NA | NA | NA | NA | NA |
| Gm15625 | 0 NA | NA | NA | NA | NA |
| Gm15626 | 0 NA | NA | NA | NA | NA |
| Gm15636 | 0 NA | NA | NA | NA | NA |
| Gm15659 | 0 NA | NA | NA | NA | NA |
| Gm15661 | 0 NA | NA | NA | NA | NA |
| Gm15664 | 0 NA | NA | NA | NA | NA |
| Gm15665 | 0 NA | NA | NA | NA | NA |
| Gm15670 | 0 NA | NA | NA | NA | NA |
| Gm15678 | 0 NA | NA | NA | NA | NA |
| Gm15681 | 0 NA | NA | NA | NA | NA |
| Gm15682 | 0 NA | NA | NA | NA | NA |
| Gm15692 | 0 NA | NA | NA | NA | NA |
| Gm15693 | 0 NA | NA | NA | NA | NA |
| Gm15702 | 0 NA | NA | NA | NA | NA |
| Gm15703 | 0 NA | NA | NA | NA | NA |
| Gm15707 | 0 NA | NA | NA | NA | NA |
| Gm15709 | 0 NA | NA | NA | NA | NA |
| Gm15715 | 0 NA | NA | NA | NA | NA |
| Gm15719 | 0 NA | NA | NA | NA | NA |
| Gm15725 | 0 NA | NA | NA | NA | NA |
| Gm15730 | 0 NA | NA | NA | NA | NA |

|         |      |    |    |    |    |
|---------|------|----|----|----|----|
| Gm15740 | 0 NA | NA | NA | NA | NA |
| Gm15741 | 0 NA | NA | NA | NA | NA |
| Gm15745 | 0 NA | NA | NA | NA | NA |
| Gm15746 | 0 NA | NA | NA | NA | NA |
| Gm15752 | 0 NA | NA | NA | NA | NA |
| Gm15753 | 0 NA | NA | NA | NA | NA |
| Gm15754 | 0 NA | NA | NA | NA | NA |
| Gm15763 | 0 NA | NA | NA | NA | NA |
| Gm15765 | 0 NA | NA | NA | NA | NA |
| Gm15766 | 0 NA | NA | NA | NA | NA |
| Gm15770 | 0 NA | NA | NA | NA | NA |
| Gm15778 | 0 NA | NA | NA | NA | NA |
| Gm15780 | 0 NA | NA | NA | NA | NA |
| Gm15781 | 0 NA | NA | NA | NA | NA |
| Gm15782 | 0 NA | NA | NA | NA | NA |
| Gm15783 | 0 NA | NA | NA | NA | NA |
| Gm15785 | 0 NA | NA | NA | NA | NA |
| Gm15786 | 0 NA | NA | NA | NA | NA |
| Gm15796 | 0 NA | NA | NA | NA | NA |
| Gm15801 | 0 NA | NA | NA | NA | NA |
| Gm15803 | 0 NA | NA | NA | NA | NA |
| Gm15806 | 0 NA | NA | NA | NA | NA |
| Gm15812 | 0 NA | NA | NA | NA | NA |
| Gm15815 | 0 NA | NA | NA | NA | NA |
| Gm15820 | 0 NA | NA | NA | NA | NA |
| Gm15826 | 0 NA | NA | NA | NA | NA |
| Gm15828 | 0 NA | NA | NA | NA | NA |
| Gm15833 | 0 NA | NA | NA | NA | NA |
| Gm15836 | 0 NA | NA | NA | NA | NA |
| Gm15838 | 0 NA | NA | NA | NA | NA |
| Gm15840 | 0 NA | NA | NA | NA | NA |
| Gm15843 | 0 NA | NA | NA | NA | NA |
| Gm15844 | 0 NA | NA | NA | NA | NA |
| Gm15846 | 0 NA | NA | NA | NA | NA |
| Gm15854 | 0 NA | NA | NA | NA | NA |
| Gm15861 | 0 NA | NA | NA | NA | NA |
| Gm1587  | 0 NA | NA | NA | NA | NA |
| Gm15877 | 0 NA | NA | NA | NA | NA |
| Gm15881 | 0 NA | NA | NA | NA | NA |
| Gm15897 | 0 NA | NA | NA | NA | NA |
| Gm15899 | 0 NA | NA | NA | NA | NA |
| Gm15905 | 0 NA | NA | NA | NA | NA |
| Gm15913 | 0 NA | NA | NA | NA | NA |
| Gm15916 | 0 NA | NA | NA | NA | NA |
| Gm15923 | 0 NA | NA | NA | NA | NA |
| Gm15926 | 0 NA | NA | NA | NA | NA |
| Gm15930 | 0 NA | NA | NA | NA | NA |
| Gm15933 | 0 NA | NA | NA | NA | NA |
| Gm15951 | 0 NA | NA | NA | NA | NA |
| Gm15953 | 0 NA | NA | NA | NA | NA |
| Gm15957 | 0 NA | NA | NA | NA | NA |
| Gm15959 | 0 NA | NA | NA | NA | NA |
| Gm15967 | 0 NA | NA | NA | NA | NA |
| Gm15968 | 0 NA | NA | NA | NA | NA |
| Gm15970 | 0 NA | NA | NA | NA | NA |
| Gm15971 | 0 NA | NA | NA | NA | NA |
| Gm15981 | 0 NA | NA | NA | NA | NA |
| Gm15986 | 0 NA | NA | NA | NA | NA |
| Gm15988 | 0 NA | NA | NA | NA | NA |
| Gm15989 | 0 NA | NA | NA | NA | NA |
| Gm15994 | 0 NA | NA | NA | NA | NA |
| Gm16007 | 0 NA | NA | NA | NA | NA |
| Gm16016 | 0 NA | NA | NA | NA | NA |
| Gm16017 | 0 NA | NA | NA | NA | NA |
| Gm16020 | 0 NA | NA | NA | NA | NA |
| Gm16021 | 0 NA | NA | NA | NA | NA |

|         |      |    |    |    |    |
|---------|------|----|----|----|----|
| Gm16027 | 0 NA | NA | NA | NA | NA |
| Gm16038 | 0 NA | NA | NA | NA | NA |
| Gm16042 | 0 NA | NA | NA | NA | NA |
| Gm16056 | 0 NA | NA | NA | NA | NA |
| Gm16057 | 0 NA | NA | NA | NA | NA |
| Gm16061 | 0 NA | NA | NA | NA | NA |
| Gm16071 | 0 NA | NA | NA | NA | NA |
| Gm16074 | 0 NA | NA | NA | NA | NA |
| Gm16077 | 0 NA | NA | NA | NA | NA |
| Gm16082 | 0 NA | NA | NA | NA | NA |
| Gm16101 | 0 NA | NA | NA | NA | NA |
| Gm16102 | 0 NA | NA | NA | NA | NA |
| Gm16107 | 0 NA | NA | NA | NA | NA |
| Gm16111 | 0 NA | NA | NA | NA | NA |
| Gm16112 | 0 NA | NA | NA | NA | NA |
| Gm16114 | 0 NA | NA | NA | NA | NA |
| Gm16123 | 0 NA | NA | NA | NA | NA |
| Gm16125 | 0 NA | NA | NA | NA | NA |
| Gm16129 | 0 NA | NA | NA | NA | NA |
| Gm16138 | 0 NA | NA | NA | NA | NA |
| Gm16139 | 0 NA | NA | NA | NA | NA |
| Gm16148 | 0 NA | NA | NA | NA | NA |
| Gm16149 | 0 NA | NA | NA | NA | NA |
| Gm16162 | 0 NA | NA | NA | NA | NA |
| Gm16164 | 0 NA | NA | NA | NA | NA |
| Gm16167 | 0 NA | NA | NA | NA | NA |
| Gm16171 | 0 NA | NA | NA | NA | NA |
| Gm16179 | 0 NA | NA | NA | NA | NA |
| Gm16184 | 0 NA | NA | NA | NA | NA |
| Gm16186 | 0 NA | NA | NA | NA | NA |
| Gm16198 | 0 NA | NA | NA | NA | NA |
| Gm16202 | 0 NA | NA | NA | NA | NA |
| Gm16204 | 0 NA | NA | NA | NA | NA |
| Gm16215 | 0 NA | NA | NA | NA | NA |
| Gm16216 | 0 NA | NA | NA | NA | NA |
| Gm16218 | 0 NA | NA | NA | NA | NA |
| Gm16219 | 0 NA | NA | NA | NA | NA |
| Gm16221 | 0 NA | NA | NA | NA | NA |
| Gm16228 | 0 NA | NA | NA | NA | NA |
| Gm16236 | 0 NA | NA | NA | NA | NA |
| Gm16242 | 0 NA | NA | NA | NA | NA |
| Gm16250 | 0 NA | NA | NA | NA | NA |
| Gm16254 | 0 NA | NA | NA | NA | NA |
| Gm16259 | 0 NA | NA | NA | NA | NA |
| Gm16260 | 0 NA | NA | NA | NA | NA |
| Gm16261 | 0 NA | NA | NA | NA | NA |
| Gm16265 | 0 NA | NA | NA | NA | NA |
| Gm16269 | 0 NA | NA | NA | NA | NA |
| Gm16273 | 0 NA | NA | NA | NA | NA |
| Gm16276 | 0 NA | NA | NA | NA | NA |
| Gm16284 | 0 NA | NA | NA | NA | NA |
| Gm16285 | 0 NA | NA | NA | NA | NA |
| Gm16288 | 0 NA | NA | NA | NA | NA |
| Gm16289 | 0 NA | NA | NA | NA | NA |
| Gm16290 | 0 NA | NA | NA | NA | NA |
| Gm16296 | 0 NA | NA | NA | NA | NA |
| Gm16298 | 0 NA | NA | NA | NA | NA |
| Gm16300 | 0 NA | NA | NA | NA | NA |
| Gm16301 | 0 NA | NA | NA | NA | NA |
| Gm16303 | 0 NA | NA | NA | NA | NA |
| Gm16304 | 0 NA | NA | NA | NA | NA |
| Gm16305 | 0 NA | NA | NA | NA | NA |
| Gm16307 | 0 NA | NA | NA | NA | NA |
| Gm16318 | 0 NA | NA | NA | NA | NA |
| Gm16326 | 0 NA | NA | NA | NA | NA |
| Gm16327 | 0 NA | NA | NA | NA | NA |

|         |      |    |    |    |    |
|---------|------|----|----|----|----|
| Gm16328 | 0 NA | NA | NA | NA | NA |
| Gm16330 | 0 NA | NA | NA | NA | NA |
| Gm16342 | 0 NA | NA | NA | NA | NA |
| Gm16354 | 0 NA | NA | NA | NA | NA |
| Gm16355 | 0 NA | NA | NA | NA | NA |
| Gm16356 | 0 NA | NA | NA | NA | NA |
| Gm16357 | 0 NA | NA | NA | NA | NA |
| Gm16358 | 0 NA | NA | NA | NA | NA |
| Gm16359 | 0 NA | NA | NA | NA | NA |
| Gm16362 | 0 NA | NA | NA | NA | NA |
| Gm16367 | 0 NA | NA | NA | NA | NA |
| Gm16368 | 0 NA | NA | NA | NA | NA |
| Gm16373 | 0 NA | NA | NA | NA | NA |
| Gm16380 | 0 NA | NA | NA | NA | NA |
| Gm16381 | 0 NA | NA | NA | NA | NA |
| Gm16383 | 0 NA | NA | NA | NA | NA |
| Gm16387 | 0 NA | NA | NA | NA | NA |
| Gm16391 | 0 NA | NA | NA | NA | NA |
| Gm16397 | 0 NA | NA | NA | NA | NA |
| Gm16399 | 0 NA | NA | NA | NA | NA |
| Gm16400 | 0 NA | NA | NA | NA | NA |
| Gm16404 | 0 NA | NA | NA | NA | NA |
| Gm16405 | 0 NA | NA | NA | NA | NA |
| Gm16407 | 0 NA | NA | NA | NA | NA |
| Gm16410 | 0 NA | NA | NA | NA | NA |
| Gm16411 | 0 NA | NA | NA | NA | NA |
| Gm16416 | 0 NA | NA | NA | NA | NA |
| Gm16421 | 0 NA | NA | NA | NA | NA |
| Gm16423 | 0 NA | NA | NA | NA | NA |
| Gm16428 | 0 NA | NA | NA | NA | NA |
| Gm16429 | 0 NA | NA | NA | NA | NA |
| Gm16430 | 0 NA | NA | NA | NA | NA |
| Gm16434 | 0 NA | NA | NA | NA | NA |
| Gm16440 | 0 NA | NA | NA | NA | NA |
| Gm16441 | 0 NA | NA | NA | NA | NA |
| Gm16443 | 0 NA | NA | NA | NA | NA |
| Gm16445 | 0 NA | NA | NA | NA | NA |
| Gm16451 | 0 NA | NA | NA | NA | NA |
| Gm16456 | 0 NA | NA | NA | NA | NA |
| Gm16458 | 0 NA | NA | NA | NA | NA |
| Gm16463 | 0 NA | NA | NA | NA | NA |
| Gm16471 | 0 NA | NA | NA | NA | NA |
| Gm16475 | 0 NA | NA | NA | NA | NA |
| Gm16476 | 0 NA | NA | NA | NA | NA |
| Gm16480 | 0 NA | NA | NA | NA | NA |
| Gm16481 | 0 NA | NA | NA | NA | NA |
| Gm16490 | 0 NA | NA | NA | NA | NA |
| Gm16494 | 0 NA | NA | NA | NA | NA |
| Gm16506 | 0 NA | NA | NA | NA | NA |
| Gm16510 | 0 NA | NA | NA | NA | NA |
| Gm16511 | 0 NA | NA | NA | NA | NA |
| Gm16531 | 0 NA | NA | NA | NA | NA |
| Gm16533 | 0 NA | NA | NA | NA | NA |
| Gm16539 | 0 NA | NA | NA | NA | NA |
| Gm16545 | 0 NA | NA | NA | NA | NA |
| Gm16546 | 0 NA | NA | NA | NA | NA |
| Gm16547 | 0 NA | NA | NA | NA | NA |
| Gm16550 | 0 NA | NA | NA | NA | NA |
| Gm16557 | 0 NA | NA | NA | NA | NA |
| Gm16560 | 0 NA | NA | NA | NA | NA |
| Gm16561 | 0 NA | NA | NA | NA | NA |
| Gm16563 | 0 NA | NA | NA | NA | NA |
| Gm16569 | 0 NA | NA | NA | NA | NA |
| Gm16571 | 0 NA | NA | NA | NA | NA |
| Gm16580 | 0 NA | NA | NA | NA | NA |
| Gm16584 | 0 NA | NA | NA | NA | NA |

|         |      |    |    |    |    |
|---------|------|----|----|----|----|
| Gm16589 | 0 NA | NA | NA | NA | NA |
| Gm16968 | 0 NA | NA | NA | NA | NA |
| Gm17014 | 0 NA | NA | NA | NA | NA |
| Gm17019 | 0 NA | NA | NA | NA | NA |
| Gm17020 | 0 NA | NA | NA | NA | NA |
| Gm17027 | 0 NA | NA | NA | NA | NA |
| Gm17030 | 0 NA | NA | NA | NA | NA |
| Gm17031 | 0 NA | NA | NA | NA | NA |
| Gm17038 | 0 NA | NA | NA | NA | NA |
| Gm17043 | 0 NA | NA | NA | NA | NA |
| Gm17044 | 0 NA | NA | NA | NA | NA |
| Gm17045 | 0 NA | NA | NA | NA | NA |
| Gm17046 | 0 NA | NA | NA | NA | NA |
| Gm17047 | 0 NA | NA | NA | NA | NA |
| Gm17051 | 0 NA | NA | NA | NA | NA |
| Gm17052 | 0 NA | NA | NA | NA | NA |
| Gm17054 | 0 NA | NA | NA | NA | NA |
| Gm17061 | 0 NA | NA | NA | NA | NA |
| Gm17062 | 0 NA | NA | NA | NA | NA |
| Gm17063 | 0 NA | NA | NA | NA | NA |
| Gm17064 | 0 NA | NA | NA | NA | NA |
| Gm17065 | 0 NA | NA | NA | NA | NA |
| Gm17068 | 0 NA | NA | NA | NA | NA |
| Gm17069 | 0 NA | NA | NA | NA | NA |
| Gm17070 | 0 NA | NA | NA | NA | NA |
| Gm17072 | 0 NA | NA | NA | NA | NA |
| Gm17073 | 0 NA | NA | NA | NA | NA |
| Gm17074 | 0 NA | NA | NA | NA | NA |
| Gm17075 | 0 NA | NA | NA | NA | NA |
| Gm17076 | 0 NA | NA | NA | NA | NA |
| Gm17078 | 0 NA | NA | NA | NA | NA |
| Gm17079 | 0 NA | NA | NA | NA | NA |
| Gm17083 | 0 NA | NA | NA | NA | NA |
| Gm17086 | 0 NA | NA | NA | NA | NA |
| Gm17087 | 0 NA | NA | NA | NA | NA |
| Gm17091 | 0 NA | NA | NA | NA | NA |
| Gm17093 | 0 NA | NA | NA | NA | NA |
| Gm17101 | 0 NA | NA | NA | NA | NA |
| Gm17107 | 0 NA | NA | NA | NA | NA |
| Gm17109 | 0 NA | NA | NA | NA | NA |
| Gm17113 | 0 NA | NA | NA | NA | NA |
| Gm17117 | 0 NA | NA | NA | NA | NA |
| Gm17121 | 0 NA | NA | NA | NA | NA |
| Gm17124 | 0 NA | NA | NA | NA | NA |
| Gm17126 | 0 NA | NA | NA | NA | NA |
| Gm17129 | 0 NA | NA | NA | NA | NA |
| Gm17136 | 0 NA | NA | NA | NA | NA |
| Gm17138 | 0 NA | NA | NA | NA | NA |
| Gm17142 | 0 NA | NA | NA | NA | NA |
| Gm17148 | 0 NA | NA | NA | NA | NA |
| Gm17150 | 0 NA | NA | NA | NA | NA |
| Gm17152 | 0 NA | NA | NA | NA | NA |
| Gm17153 | 0 NA | NA | NA | NA | NA |
| Gm17154 | 0 NA | NA | NA | NA | NA |
| Gm17155 | 0 NA | NA | NA | NA | NA |
| Gm17157 | 0 NA | NA | NA | NA | NA |
| Gm17158 | 0 NA | NA | NA | NA | NA |
| Gm17159 | 0 NA | NA | NA | NA | NA |
| Gm17161 | 0 NA | NA | NA | NA | NA |
| Gm17162 | 0 NA | NA | NA | NA | NA |
| Gm17164 | 0 NA | NA | NA | NA | NA |
| Gm17165 | 0 NA | NA | NA | NA | NA |
| Gm17166 | 0 NA | NA | NA | NA | NA |
| Gm17169 | 0 NA | NA | NA | NA | NA |
| Gm17170 | 0 NA | NA | NA | NA | NA |
| Gm17174 | 0 NA | NA | NA | NA | NA |

|         |      |    |    |    |    |
|---------|------|----|----|----|----|
| Gm17175 | 0 NA | NA | NA | NA | NA |
| Gm17181 | 0 NA | NA | NA | NA | NA |
| Gm17183 | 0 NA | NA | NA | NA | NA |
| Gm17184 | 0 NA | NA | NA | NA | NA |
| Gm17186 | 0 NA | NA | NA | NA | NA |
| Gm17187 | 0 NA | NA | NA | NA | NA |
| Gm17190 | 0 NA | NA | NA | NA | NA |
| Gm17192 | 0 NA | NA | NA | NA | NA |
| Gm17194 | 0 NA | NA | NA | NA | NA |
| Gm17198 | 0 NA | NA | NA | NA | NA |
| Gm17199 | 0 NA | NA | NA | NA | NA |
| Gm17204 | 0 NA | NA | NA | NA | NA |
| Gm17208 | 0 NA | NA | NA | NA | NA |
| Gm17212 | 0 NA | NA | NA | NA | NA |
| Gm17213 | 0 NA | NA | NA | NA | NA |
| Gm17214 | 0 NA | NA | NA | NA | NA |
| Gm17217 | 0 NA | NA | NA | NA | NA |
| Gm17221 | 0 NA | NA | NA | NA | NA |
| Gm17222 | 0 NA | NA | NA | NA | NA |
| Gm17223 | 0 NA | NA | NA | NA | NA |
| Gm17235 | 0 NA | NA | NA | NA | NA |
| Gm17268 | 0 NA | NA | NA | NA | NA |
| Gm17330 | 0 NA | NA | NA | NA | NA |
| Gm17332 | 0 NA | NA | NA | NA | NA |
| Gm17364 | 0 NA | NA | NA | NA | NA |
| Gm17366 | 0 NA | NA | NA | NA | NA |
| Gm17376 | 0 NA | NA | NA | NA | NA |
| Gm17377 | 0 NA | NA | NA | NA | NA |
| Gm17387 | 0 NA | NA | NA | NA | NA |
| Gm17391 | 0 NA | NA | NA | NA | NA |
| Gm17402 | 0 NA | NA | NA | NA | NA |
| Gm17409 | 0 NA | NA | NA | NA | NA |
| Gm17416 | 0 NA | NA | NA | NA | NA |
| Gm17421 | 0 NA | NA | NA | NA | NA |
| Gm17428 | 0 NA | NA | NA | NA | NA |
| Gm17467 | 0 NA | NA | NA | NA | NA |
| Gm17472 | 0 NA | NA | NA | NA | NA |
| Gm17482 | 0 NA | NA | NA | NA | NA |
| Gm17490 | 0 NA | NA | NA | NA | NA |
| Gm17528 | 0 NA | NA | NA | NA | NA |
| Gm17535 | 0 NA | NA | NA | NA | NA |
| Gm17541 | 0 NA | NA | NA | NA | NA |
| Gm17542 | 0 NA | NA | NA | NA | NA |
| Gm17572 | 0 NA | NA | NA | NA | NA |
| Gm17577 | 0 NA | NA | NA | NA | NA |
| Gm1758  | 0 NA | NA | NA | NA | NA |
| Gm17581 | 0 NA | NA | NA | NA | NA |
| Gm17606 | 0 NA | NA | NA | NA | NA |
| Gm17617 | 0 NA | NA | NA | NA | NA |
| Gm17622 | 0 NA | NA | NA | NA | NA |
| Gm17631 | 0 NA | NA | NA | NA | NA |
| Gm17651 | 0 NA | NA | NA | NA | NA |
| Gm17657 | 0 NA | NA | NA | NA | NA |
| Gm17662 | 0 NA | NA | NA | NA | NA |
| Gm17711 | 0 NA | NA | NA | NA | NA |
| Gm17720 | 0 NA | NA | NA | NA | NA |
| Gm17737 | 0 NA | NA | NA | NA | NA |
| Gm17743 | 0 NA | NA | NA | NA | NA |
| Gm17748 | 0 NA | NA | NA | NA | NA |
| Gm17766 | 0 NA | NA | NA | NA | NA |
| Gm17772 | 0 NA | NA | NA | NA | NA |
| Gm17775 | 0 NA | NA | NA | NA | NA |
| Gm17777 | 0 NA | NA | NA | NA | NA |
| Gm17779 | 0 NA | NA | NA | NA | NA |
| Gm17780 | 0 NA | NA | NA | NA | NA |
| Gm17781 | 0 NA | NA | NA | NA | NA |



|         |      |    |    |    |    |
|---------|------|----|----|----|----|
| Gm17790 | 0 NA | NA | NA | NA | NA |
| Gm17791 | 0 NA | NA | NA | NA | NA |
| Gm17794 | 0 NA | NA | NA | NA | NA |
| Gm17795 | 0 NA | NA | NA | NA | NA |
| Gm17797 | 0 NA | NA | NA | NA | NA |
| Gm17798 | 0 NA | NA | NA | NA | NA |
| Gm17799 | 0 NA | NA | NA | NA | NA |
| Gm17800 | 0 NA | NA | NA | NA | NA |
| Gm17805 | 0 NA | NA | NA | NA | NA |
| Gm17806 | 0 NA | NA | NA | NA | NA |
| Gm17807 | 0 NA | NA | NA | NA | NA |
| Gm17811 | 0 NA | NA | NA | NA | NA |
| Gm17812 | 0 NA | NA | NA | NA | NA |
| Gm17813 | 0 NA | NA | NA | NA | NA |
| Gm17815 | 0 NA | NA | NA | NA | NA |
| Gm17821 | 0 NA | NA | NA | NA | NA |
| Gm17822 | 0 NA | NA | NA | NA | NA |
| Gm17824 | 0 NA | NA | NA | NA | NA |
| Gm17825 | 0 NA | NA | NA | NA | NA |
| Gm17826 | 0 NA | NA | NA | NA | NA |
| Gm17827 | 0 NA | NA | NA | NA | NA |
| Gm17829 | 0 NA | NA | NA | NA | NA |
| Gm17831 | 0 NA | NA | NA | NA | NA |
| Gm17832 | 0 NA | NA | NA | NA | NA |
| Gm17834 | 0 NA | NA | NA | NA | NA |
| Gm17835 | 0 NA | NA | NA | NA | NA |
| Gm17836 | 0 NA | NA | NA | NA | NA |
| Gm17837 | 0 NA | NA | NA | NA | NA |
| Gm17838 | 0 NA | NA | NA | NA | NA |
| Gm17847 | 0 NA | NA | NA | NA | NA |
| Gm17850 | 0 NA | NA | NA | NA | NA |
| Gm17851 | 0 NA | NA | NA | NA | NA |
| Gm17870 | 0 NA | NA | NA | NA | NA |
| Gm17872 | 0 NA | NA | NA | NA | NA |
| Gm17873 | 0 NA | NA | NA | NA | NA |
| Gm17877 | 0 NA | NA | NA | NA | NA |
| Gm17878 | 0 NA | NA | NA | NA | NA |
| Gm17882 | 0 NA | NA | NA | NA | NA |
| Gm17887 | 0 NA | NA | NA | NA | NA |
| Gm17889 | 0 NA | NA | NA | NA | NA |
| Gm17890 | 0 NA | NA | NA | NA | NA |
| Gm17892 | 0 NA | NA | NA | NA | NA |
| Gm17895 | 0 NA | NA | NA | NA | NA |
| Gm17907 | 0 NA | NA | NA | NA | NA |
| Gm17908 | 0 NA | NA | NA | NA | NA |
| Gm17910 | 0 NA | NA | NA | NA | NA |
| Gm17915 | 0 NA | NA | NA | NA | NA |
| Gm17916 | 0 NA | NA | NA | NA | NA |
| Gm17918 | 0 NA | NA | NA | NA | NA |
| Gm17919 | 0 NA | NA | NA | NA | NA |
| Gm17923 | 0 NA | NA | NA | NA | NA |
| Gm17931 | 0 NA | NA | NA | NA | NA |
| Gm17932 | 0 NA | NA | NA | NA | NA |
| Gm17934 | 0 NA | NA | NA | NA | NA |
| Gm17935 | 0 NA | NA | NA | NA | NA |
| Gm17937 | 0 NA | NA | NA | NA | NA |
| Gm17940 | 0 NA | NA | NA | NA | NA |
| Gm17941 | 0 NA | NA | NA | NA | NA |
| Gm17946 | 0 NA | NA | NA | NA | NA |
| Gm17950 | 0 NA | NA | NA | NA | NA |
| Gm17951 | 0 NA | NA | NA | NA | NA |
| Gm17953 | 0 NA | NA | NA | NA | NA |
| Gm17954 | 0 NA | NA | NA | NA | NA |
| Gm17956 | 0 NA | NA | NA | NA | NA |
| Gm17965 | 0 NA | NA | NA | NA | NA |
| Gm17966 | 0 NA | NA | NA | NA | NA |

|         |      |    |    |    |    |
|---------|------|----|----|----|----|
| Gm17967 | 0 NA | NA | NA | NA | NA |
| Gm17968 | 0 NA | NA | NA | NA | NA |
| Gm17973 | 0 NA | NA | NA | NA | NA |
| Gm17976 | 0 NA | NA | NA | NA | NA |
| Gm17977 | 0 NA | NA | NA | NA | NA |
| Gm17978 | 0 NA | NA | NA | NA | NA |
| Gm17979 | 0 NA | NA | NA | NA | NA |
| Gm17983 | 0 NA | NA | NA | NA | NA |
| Gm17984 | 0 NA | NA | NA | NA | NA |
| Gm17987 | 0 NA | NA | NA | NA | NA |
| Gm17988 | 0 NA | NA | NA | NA | NA |
| Gm17989 | 0 NA | NA | NA | NA | NA |
| Gm17990 | 0 NA | NA | NA | NA | NA |
| Gm17991 | 0 NA | NA | NA | NA | NA |
| Gm17992 | 0 NA | NA | NA | NA | NA |
| Gm17995 | 0 NA | NA | NA | NA | NA |
| Gm17997 | 0 NA | NA | NA | NA | NA |
| Gm18000 | 0 NA | NA | NA | NA | NA |
| Gm18001 | 0 NA | NA | NA | NA | NA |
| Gm18003 | 0 NA | NA | NA | NA | NA |
| Gm18006 | 0 NA | NA | NA | NA | NA |
| Gm18007 | 0 NA | NA | NA | NA | NA |
| Gm18010 | 0 NA | NA | NA | NA | NA |
| Gm18011 | 0 NA | NA | NA | NA | NA |
| Gm18012 | 0 NA | NA | NA | NA | NA |
| Gm18014 | 0 NA | NA | NA | NA | NA |
| Gm18015 | 0 NA | NA | NA | NA | NA |
| Gm18016 | 0 NA | NA | NA | NA | NA |
| Gm18018 | 0 NA | NA | NA | NA | NA |
| Gm18024 | 0 NA | NA | NA | NA | NA |
| Gm18025 | 0 NA | NA | NA | NA | NA |
| Gm18027 | 0 NA | NA | NA | NA | NA |
| Gm18029 | 0 NA | NA | NA | NA | NA |
| Gm18030 | 0 NA | NA | NA | NA | NA |
| Gm18032 | 0 NA | NA | NA | NA | NA |
| Gm18033 | 0 NA | NA | NA | NA | NA |
| Gm18035 | 0 NA | NA | NA | NA | NA |
| Gm18036 | 0 NA | NA | NA | NA | NA |
| Gm18039 | 0 NA | NA | NA | NA | NA |
| Gm18041 | 0 NA | NA | NA | NA | NA |
| Gm18043 | 0 NA | NA | NA | NA | NA |
| Gm18049 | 0 NA | NA | NA | NA | NA |
| Gm18052 | 0 NA | NA | NA | NA | NA |
| Gm18054 | 0 NA | NA | NA | NA | NA |
| Gm18055 | 0 NA | NA | NA | NA | NA |
| Gm18056 | 0 NA | NA | NA | NA | NA |
| Gm18057 | 0 NA | NA | NA | NA | NA |
| Gm18058 | 0 NA | NA | NA | NA | NA |
| Gm18059 | 0 NA | NA | NA | NA | NA |
| Gm18060 | 0 NA | NA | NA | NA | NA |
| Gm18061 | 0 NA | NA | NA | NA | NA |
| Gm18062 | 0 NA | NA | NA | NA | NA |
| Gm18063 | 0 NA | NA | NA | NA | NA |
| Gm18065 | 0 NA | NA | NA | NA | NA |
| Gm18066 | 0 NA | NA | NA | NA | NA |
| Gm18071 | 0 NA | NA | NA | NA | NA |
| Gm18072 | 0 NA | NA | NA | NA | NA |
| Gm18073 | 0 NA | NA | NA | NA | NA |
| Gm18074 | 0 NA | NA | NA | NA | NA |
| Gm18075 | 0 NA | NA | NA | NA | NA |
| Gm18076 | 0 NA | NA | NA | NA | NA |
| Gm18077 | 0 NA | NA | NA | NA | NA |
| Gm18080 | 0 NA | NA | NA | NA | NA |
| Gm18082 | 0 NA | NA | NA | NA | NA |
| Gm18092 | 0 NA | NA | NA | NA | NA |
| Gm18094 | 0 NA | NA | NA | NA | NA |

|         |      |    |    |    |    |
|---------|------|----|----|----|----|
| Gm18100 | 0 NA | NA | NA | NA | NA |
| Gm18101 | 0 NA | NA | NA | NA | NA |
| Gm18103 | 0 NA | NA | NA | NA | NA |
| Gm18112 | 0 NA | NA | NA | NA | NA |
| Gm18114 | 0 NA | NA | NA | NA | NA |
| Gm18115 | 0 NA | NA | NA | NA | NA |
| Gm18116 | 0 NA | NA | NA | NA | NA |
| Gm18117 | 0 NA | NA | NA | NA | NA |
| Gm18118 | 0 NA | NA | NA | NA | NA |
| Gm18119 | 0 NA | NA | NA | NA | NA |
| Gm18122 | 0 NA | NA | NA | NA | NA |
| Gm18123 | 0 NA | NA | NA | NA | NA |
| Gm18127 | 0 NA | NA | NA | NA | NA |
| Gm18129 | 0 NA | NA | NA | NA | NA |
| Gm18131 | 0 NA | NA | NA | NA | NA |
| Gm18134 | 0 NA | NA | NA | NA | NA |
| Gm18135 | 0 NA | NA | NA | NA | NA |
| Gm18142 | 0 NA | NA | NA | NA | NA |
| Gm18143 | 0 NA | NA | NA | NA | NA |
| Gm18146 | 0 NA | NA | NA | NA | NA |
| Gm18148 | 0 NA | NA | NA | NA | NA |
| Gm18150 | 0 NA | NA | NA | NA | NA |
| Gm18152 | 0 NA | NA | NA | NA | NA |
| Gm18153 | 0 NA | NA | NA | NA | NA |
| Gm18154 | 0 NA | NA | NA | NA | NA |
| Gm18155 | 0 NA | NA | NA | NA | NA |
| Gm18159 | 0 NA | NA | NA | NA | NA |
| Gm18160 | 0 NA | NA | NA | NA | NA |
| Gm18164 | 0 NA | NA | NA | NA | NA |
| Gm18165 | 0 NA | NA | NA | NA | NA |
| Gm18166 | 0 NA | NA | NA | NA | NA |
| Gm18177 | 0 NA | NA | NA | NA | NA |
| Gm1818  | 0 NA | NA | NA | NA | NA |
| Gm18181 | 0 NA | NA | NA | NA | NA |
| Gm18182 | 0 NA | NA | NA | NA | NA |
| Gm18183 | 0 NA | NA | NA | NA | NA |
| Gm18185 | 0 NA | NA | NA | NA | NA |
| Gm18187 | 0 NA | NA | NA | NA | NA |
| Gm18189 | 0 NA | NA | NA | NA | NA |
| Gm18191 | 0 NA | NA | NA | NA | NA |
| Gm18193 | 0 NA | NA | NA | NA | NA |
| Gm18195 | 0 NA | NA | NA | NA | NA |
| Gm18198 | 0 NA | NA | NA | NA | NA |
| Gm18199 | 0 NA | NA | NA | NA | NA |
| Gm18200 | 0 NA | NA | NA | NA | NA |
| Gm18201 | 0 NA | NA | NA | NA | NA |
| Gm18204 | 0 NA | NA | NA | NA | NA |
| Gm18205 | 0 NA | NA | NA | NA | NA |
| Gm18210 | 0 NA | NA | NA | NA | NA |
| Gm18213 | 0 NA | NA | NA | NA | NA |
| Gm18215 | 0 NA | NA | NA | NA | NA |
| Gm18216 | 0 NA | NA | NA | NA | NA |
| Gm18222 | 0 NA | NA | NA | NA | NA |
| Gm18226 | 0 NA | NA | NA | NA | NA |
| Gm18242 | 0 NA | NA | NA | NA | NA |
| Gm18243 | 0 NA | NA | NA | NA | NA |
| Gm18244 | 0 NA | NA | NA | NA | NA |
| Gm18246 | 0 NA | NA | NA | NA | NA |
| Gm18247 | 0 NA | NA | NA | NA | NA |
| Gm18248 | 0 NA | NA | NA | NA | NA |
| Gm18251 | 0 NA | NA | NA | NA | NA |
| Gm18252 | 0 NA | NA | NA | NA | NA |
| Gm18254 | 0 NA | NA | NA | NA | NA |
| Gm18255 | 0 NA | NA | NA | NA | NA |
| Gm18256 | 0 NA | NA | NA | NA | NA |
| Gm18258 | 0 NA | NA | NA | NA | NA |

|         |      |    |    |    |    |
|---------|------|----|----|----|----|
| Gm1826  | 0 NA | NA | NA | NA | NA |
| Gm18260 | 0 NA | NA | NA | NA | NA |
| Gm18263 | 0 NA | NA | NA | NA | NA |
| Gm18265 | 0 NA | NA | NA | NA | NA |
| Gm18268 | 0 NA | NA | NA | NA | NA |
| Gm18276 | 0 NA | NA | NA | NA | NA |
| Gm18284 | 0 NA | NA | NA | NA | NA |
| Gm18290 | 0 NA | NA | NA | NA | NA |
| Gm18291 | 0 NA | NA | NA | NA | NA |
| Gm18296 | 0 NA | NA | NA | NA | NA |
| Gm18299 | 0 NA | NA | NA | NA | NA |
| Gm18301 | 0 NA | NA | NA | NA | NA |
| Gm18304 | 0 NA | NA | NA | NA | NA |
| Gm18305 | 0 NA | NA | NA | NA | NA |
| Gm18306 | 0 NA | NA | NA | NA | NA |
| Gm18307 | 0 NA | NA | NA | NA | NA |
| Gm18313 | 0 NA | NA | NA | NA | NA |
| Gm18320 | 0 NA | NA | NA | NA | NA |
| Gm18325 | 0 NA | NA | NA | NA | NA |
| Gm18327 | 0 NA | NA | NA | NA | NA |
| Gm18329 | 0 NA | NA | NA | NA | NA |
| Gm1833  | 0 NA | NA | NA | NA | NA |
| Gm18330 | 0 NA | NA | NA | NA | NA |
| Gm18334 | 0 NA | NA | NA | NA | NA |
| Gm18336 | 0 NA | NA | NA | NA | NA |
| Gm18338 | 0 NA | NA | NA | NA | NA |
| Gm18339 | 0 NA | NA | NA | NA | NA |
| Gm18340 | 0 NA | NA | NA | NA | NA |
| Gm18341 | 0 NA | NA | NA | NA | NA |
| Gm18343 | 0 NA | NA | NA | NA | NA |
| Gm18345 | 0 NA | NA | NA | NA | NA |
| Gm18346 | 0 NA | NA | NA | NA | NA |
| Gm18348 | 0 NA | NA | NA | NA | NA |
| Gm18349 | 0 NA | NA | NA | NA | NA |
| Gm18350 | 0 NA | NA | NA | NA | NA |
| Gm18352 | 0 NA | NA | NA | NA | NA |
| Gm18353 | 0 NA | NA | NA | NA | NA |
| Gm18354 | 0 NA | NA | NA | NA | NA |
| Gm18356 | 0 NA | NA | NA | NA | NA |
| Gm18357 | 0 NA | NA | NA | NA | NA |
| Gm18358 | 0 NA | NA | NA | NA | NA |
| Gm18360 | 0 NA | NA | NA | NA | NA |
| Gm18361 | 0 NA | NA | NA | NA | NA |
| Gm18362 | 0 NA | NA | NA | NA | NA |
| Gm18363 | 0 NA | NA | NA | NA | NA |
| Gm18367 | 0 NA | NA | NA | NA | NA |
| Gm18368 | 0 NA | NA | NA | NA | NA |
| Gm18369 | 0 NA | NA | NA | NA | NA |
| Gm18377 | 0 NA | NA | NA | NA | NA |
| Gm18378 | 0 NA | NA | NA | NA | NA |
| Gm18382 | 0 NA | NA | NA | NA | NA |
| Gm18384 | 0 NA | NA | NA | NA | NA |
| Gm18387 | 0 NA | NA | NA | NA | NA |
| Gm18388 | 0 NA | NA | NA | NA | NA |
| Gm18391 | 0 NA | NA | NA | NA | NA |
| Gm18393 | 0 NA | NA | NA | NA | NA |
| Gm18396 | 0 NA | NA | NA | NA | NA |
| Gm18397 | 0 NA | NA | NA | NA | NA |
| Gm18402 | 0 NA | NA | NA | NA | NA |
| Gm18403 | 0 NA | NA | NA | NA | NA |
| Gm18405 | 0 NA | NA | NA | NA | NA |
| Gm18406 | 0 NA | NA | NA | NA | NA |
| Gm18409 | 0 NA | NA | NA | NA | NA |
| Gm18410 | 0 NA | NA | NA | NA | NA |
| Gm18414 | 0 NA | NA | NA | NA | NA |
| Gm18415 | 0 NA | NA | NA | NA | NA |

|         |      |    |    |    |    |
|---------|------|----|----|----|----|
| Gm18416 | 0 NA | NA | NA | NA | NA |
| Gm18421 | 0 NA | NA | NA | NA | NA |
| Gm18422 | 0 NA | NA | NA | NA | NA |
| Gm18423 | 0 NA | NA | NA | NA | NA |
| Gm18426 | 0 NA | NA | NA | NA | NA |
| Gm18427 | 0 NA | NA | NA | NA | NA |
| Gm18428 | 0 NA | NA | NA | NA | NA |
| Gm18429 | 0 NA | NA | NA | NA | NA |
| Gm18430 | 0 NA | NA | NA | NA | NA |
| Gm18432 | 0 NA | NA | NA | NA | NA |
| Gm18433 | 0 NA | NA | NA | NA | NA |
| Gm18441 | 0 NA | NA | NA | NA | NA |
| Gm18442 | 0 NA | NA | NA | NA | NA |
| Gm18443 | 0 NA | NA | NA | NA | NA |
| Gm18444 | 0 NA | NA | NA | NA | NA |
| Gm18447 | 0 NA | NA | NA | NA | NA |
| Gm18448 | 0 NA | NA | NA | NA | NA |
| Gm18452 | 0 NA | NA | NA | NA | NA |
| Gm18453 | 0 NA | NA | NA | NA | NA |
| Gm18455 | 0 NA | NA | NA | NA | NA |
| Gm18458 | 0 NA | NA | NA | NA | NA |
| Gm18460 | 0 NA | NA | NA | NA | NA |
| Gm18461 | 0 NA | NA | NA | NA | NA |
| Gm18462 | 0 NA | NA | NA | NA | NA |
| Gm18463 | 0 NA | NA | NA | NA | NA |
| Gm18464 | 0 NA | NA | NA | NA | NA |
| Gm18465 | 0 NA | NA | NA | NA | NA |
| Gm18466 | 0 NA | NA | NA | NA | NA |
| Gm18467 | 0 NA | NA | NA | NA | NA |
| Gm18468 | 0 NA | NA | NA | NA | NA |
| Gm18469 | 0 NA | NA | NA | NA | NA |
| Gm18470 | 0 NA | NA | NA | NA | NA |
| Gm18471 | 0 NA | NA | NA | NA | NA |
| Gm18473 | 0 NA | NA | NA | NA | NA |
| Gm18476 | 0 NA | NA | NA | NA | NA |
| Gm18482 | 0 NA | NA | NA | NA | NA |
| Gm18484 | 0 NA | NA | NA | NA | NA |
| Gm18486 | 0 NA | NA | NA | NA | NA |
| Gm18487 | 0 NA | NA | NA | NA | NA |
| Gm18488 | 0 NA | NA | NA | NA | NA |
| Gm18489 | 0 NA | NA | NA | NA | NA |
| Gm18491 | 0 NA | NA | NA | NA | NA |
| Gm18493 | 0 NA | NA | NA | NA | NA |
| Gm18494 | 0 NA | NA | NA | NA | NA |
| Gm18500 | 0 NA | NA | NA | NA | NA |
| Gm18501 | 0 NA | NA | NA | NA | NA |
| Gm18502 | 0 NA | NA | NA | NA | NA |
| Gm18503 | 0 NA | NA | NA | NA | NA |
| Gm18504 | 0 NA | NA | NA | NA | NA |
| Gm18505 | 0 NA | NA | NA | NA | NA |
| Gm18507 | 0 NA | NA | NA | NA | NA |
| Gm18508 | 0 NA | NA | NA | NA | NA |
| Gm18510 | 0 NA | NA | NA | NA | NA |
| Gm18513 | 0 NA | NA | NA | NA | NA |
| Gm18515 | 0 NA | NA | NA | NA | NA |
| Gm18518 | 0 NA | NA | NA | NA | NA |
| Gm18520 | 0 NA | NA | NA | NA | NA |
| Gm18522 | 0 NA | NA | NA | NA | NA |
| Gm18523 | 0 NA | NA | NA | NA | NA |
| Gm18529 | 0 NA | NA | NA | NA | NA |
| Gm18531 | 0 NA | NA | NA | NA | NA |
| Gm18532 | 0 NA | NA | NA | NA | NA |
| Gm18533 | 0 NA | NA | NA | NA | NA |
| Gm18538 | 0 NA | NA | NA | NA | NA |
| Gm18539 | 0 NA | NA | NA | NA | NA |
| Gm18540 | 0 NA | NA | NA | NA | NA |

|         |      |    |    |    |    |
|---------|------|----|----|----|----|
| Gm18541 | 0 NA | NA | NA | NA | NA |
| Gm18546 | 0 NA | NA | NA | NA | NA |
| Gm18547 | 0 NA | NA | NA | NA | NA |
| Gm18551 | 0 NA | NA | NA | NA | NA |
| Gm18552 | 0 NA | NA | NA | NA | NA |
| Gm18553 | 0 NA | NA | NA | NA | NA |
| Gm18556 | 0 NA | NA | NA | NA | NA |
| Gm18557 | 0 NA | NA | NA | NA | NA |
| Gm18559 | 0 NA | NA | NA | NA | NA |
| Gm18560 | 0 NA | NA | NA | NA | NA |
| Gm18578 | 0 NA | NA | NA | NA | NA |
| Gm18580 | 0 NA | NA | NA | NA | NA |
| Gm18582 | 0 NA | NA | NA | NA | NA |
| Gm18585 | 0 NA | NA | NA | NA | NA |
| Gm18586 | 0 NA | NA | NA | NA | NA |
| Gm18591 | 0 NA | NA | NA | NA | NA |
| Gm18594 | 0 NA | NA | NA | NA | NA |
| Gm18595 | 0 NA | NA | NA | NA | NA |
| Gm18596 | 0 NA | NA | NA | NA | NA |
| Gm18597 | 0 NA | NA | NA | NA | NA |
| Gm18598 | 0 NA | NA | NA | NA | NA |
| Gm18599 | 0 NA | NA | NA | NA | NA |
| Gm18601 | 0 NA | NA | NA | NA | NA |
| Gm18602 | 0 NA | NA | NA | NA | NA |
| Gm18604 | 0 NA | NA | NA | NA | NA |
| Gm18605 | 0 NA | NA | NA | NA | NA |
| Gm18609 | 0 NA | NA | NA | NA | NA |
| Gm18611 | 0 NA | NA | NA | NA | NA |
| Gm18615 | 0 NA | NA | NA | NA | NA |
| Gm18616 | 0 NA | NA | NA | NA | NA |
| Gm18617 | 0 NA | NA | NA | NA | NA |
| Gm18618 | 0 NA | NA | NA | NA | NA |
| Gm18619 | 0 NA | NA | NA | NA | NA |
| Gm18620 | 0 NA | NA | NA | NA | NA |
| Gm18621 | 0 NA | NA | NA | NA | NA |
| Gm18623 | 0 NA | NA | NA | NA | NA |
| Gm18626 | 0 NA | NA | NA | NA | NA |
| Gm18627 | 0 NA | NA | NA | NA | NA |
| Gm18628 | 0 NA | NA | NA | NA | NA |
| Gm18629 | 0 NA | NA | NA | NA | NA |
| Gm18630 | 0 NA | NA | NA | NA | NA |
| Gm18631 | 0 NA | NA | NA | NA | NA |
| Gm18632 | 0 NA | NA | NA | NA | NA |
| Gm18636 | 0 NA | NA | NA | NA | NA |
| Gm18637 | 0 NA | NA | NA | NA | NA |
| Gm18638 | 0 NA | NA | NA | NA | NA |
| Gm18639 | 0 NA | NA | NA | NA | NA |
| Gm18640 | 0 NA | NA | NA | NA | NA |
| Gm18641 | 0 NA | NA | NA | NA | NA |
| Gm18642 | 0 NA | NA | NA | NA | NA |
| Gm18643 | 0 NA | NA | NA | NA | NA |
| Gm18644 | 0 NA | NA | NA | NA | NA |
| Gm18645 | 0 NA | NA | NA | NA | NA |
| Gm18655 | 0 NA | NA | NA | NA | NA |
| Gm18658 | 0 NA | NA | NA | NA | NA |
| Gm1866  | 0 NA | NA | NA | NA | NA |
| Gm18660 | 0 NA | NA | NA | NA | NA |
| Gm18666 | 0 NA | NA | NA | NA | NA |
| Gm18667 | 0 NA | NA | NA | NA | NA |
| Gm18669 | 0 NA | NA | NA | NA | NA |
| Gm18670 | 0 NA | NA | NA | NA | NA |
| Gm18671 | 0 NA | NA | NA | NA | NA |
| Gm18672 | 0 NA | NA | NA | NA | NA |
| Gm18681 | 0 NA | NA | NA | NA | NA |
| Gm18683 | 0 NA | NA | NA | NA | NA |
| Gm18685 | 0 NA | NA | NA | NA | NA |

|         |      |    |    |    |    |
|---------|------|----|----|----|----|
| Gm18689 | 0 NA | NA | NA | NA | NA |
| Gm18690 | 0 NA | NA | NA | NA | NA |
| Gm18691 | 0 NA | NA | NA | NA | NA |
| Gm18692 | 0 NA | NA | NA | NA | NA |
| Gm18696 | 0 NA | NA | NA | NA | NA |
| Gm18697 | 0 NA | NA | NA | NA | NA |
| Gm18698 | 0 NA | NA | NA | NA | NA |
| Gm18699 | 0 NA | NA | NA | NA | NA |
| Gm18700 | 0 NA | NA | NA | NA | NA |
| Gm18701 | 0 NA | NA | NA | NA | NA |
| Gm18702 | 0 NA | NA | NA | NA | NA |
| Gm18703 | 0 NA | NA | NA | NA | NA |
| Gm18704 | 0 NA | NA | NA | NA | NA |
| Gm18706 | 0 NA | NA | NA | NA | NA |
| Gm18709 | 0 NA | NA | NA | NA | NA |
| Gm18711 | 0 NA | NA | NA | NA | NA |
| Gm18714 | 0 NA | NA | NA | NA | NA |
| Gm18715 | 0 NA | NA | NA | NA | NA |
| Gm18717 | 0 NA | NA | NA | NA | NA |
| Gm18719 | 0 NA | NA | NA | NA | NA |
| Gm18724 | 0 NA | NA | NA | NA | NA |
| Gm18726 | 0 NA | NA | NA | NA | NA |
| Gm18727 | 0 NA | NA | NA | NA | NA |
| Gm18728 | 0 NA | NA | NA | NA | NA |
| Gm18729 | 0 NA | NA | NA | NA | NA |
| Gm18737 | 0 NA | NA | NA | NA | NA |
| Gm18745 | 0 NA | NA | NA | NA | NA |
| Gm18748 | 0 NA | NA | NA | NA | NA |
| Gm18749 | 0 NA | NA | NA | NA | NA |
| Gm18751 | 0 NA | NA | NA | NA | NA |
| Gm18753 | 0 NA | NA | NA | NA | NA |
| Gm18755 | 0 NA | NA | NA | NA | NA |
| Gm18757 | 0 NA | NA | NA | NA | NA |
| Gm18759 | 0 NA | NA | NA | NA | NA |
| Gm18760 | 0 NA | NA | NA | NA | NA |
| Gm18762 | 0 NA | NA | NA | NA | NA |
| Gm18765 | 0 NA | NA | NA | NA | NA |
| Gm18766 | 0 NA | NA | NA | NA | NA |
| Gm18774 | 0 NA | NA | NA | NA | NA |
| Gm18775 | 0 NA | NA | NA | NA | NA |
| Gm18776 | 0 NA | NA | NA | NA | NA |
| Gm18777 | 0 NA | NA | NA | NA | NA |
| Gm18779 | 0 NA | NA | NA | NA | NA |
| Gm18780 | 0 NA | NA | NA | NA | NA |
| Gm18781 | 0 NA | NA | NA | NA | NA |
| Gm18783 | 0 NA | NA | NA | NA | NA |
| Gm18787 | 0 NA | NA | NA | NA | NA |
| Gm18789 | 0 NA | NA | NA | NA | NA |
| Gm18791 | 0 NA | NA | NA | NA | NA |
| Gm18795 | 0 NA | NA | NA | NA | NA |
| Gm18796 | 0 NA | NA | NA | NA | NA |
| Gm18797 | 0 NA | NA | NA | NA | NA |
| Gm18798 | 0 NA | NA | NA | NA | NA |
| Gm18799 | 0 NA | NA | NA | NA | NA |
| Gm18801 | 0 NA | NA | NA | NA | NA |
| Gm18802 | 0 NA | NA | NA | NA | NA |
| Gm18805 | 0 NA | NA | NA | NA | NA |
| Gm18806 | 0 NA | NA | NA | NA | NA |
| Gm18808 | 0 NA | NA | NA | NA | NA |
| Gm18812 | 0 NA | NA | NA | NA | NA |
| Gm18814 | 0 NA | NA | NA | NA | NA |
| Gm18815 | 0 NA | NA | NA | NA | NA |
| Gm18820 | 0 NA | NA | NA | NA | NA |
| Gm18821 | 0 NA | NA | NA | NA | NA |
| Gm18822 | 0 NA | NA | NA | NA | NA |
| Gm18827 | 0 NA | NA | NA | NA | NA |

|         |      |    |    |    |    |
|---------|------|----|----|----|----|
| Gm18828 | 0 NA | NA | NA | NA | NA |
| Gm18833 | 0 NA | NA | NA | NA | NA |
| Gm18834 | 0 NA | NA | NA | NA | NA |
| Gm18838 | 0 NA | NA | NA | NA | NA |
| Gm18839 | 0 NA | NA | NA | NA | NA |
| Gm18843 | 0 NA | NA | NA | NA | NA |
| Gm18849 | 0 NA | NA | NA | NA | NA |
| Gm18850 | 0 NA | NA | NA | NA | NA |
| Gm18851 | 0 NA | NA | NA | NA | NA |
| Gm18854 | 0 NA | NA | NA | NA | NA |
| Gm18855 | 0 NA | NA | NA | NA | NA |
| Gm18860 | 0 NA | NA | NA | NA | NA |
| Gm18861 | 0 NA | NA | NA | NA | NA |
| Gm18863 | 0 NA | NA | NA | NA | NA |
| Gm18864 | 0 NA | NA | NA | NA | NA |
| Gm18865 | 0 NA | NA | NA | NA | NA |
| Gm18867 | 0 NA | NA | NA | NA | NA |
| Gm18871 | 0 NA | NA | NA | NA | NA |
| Gm18873 | 0 NA | NA | NA | NA | NA |
| Gm18875 | 0 NA | NA | NA | NA | NA |
| Gm18876 | 0 NA | NA | NA | NA | NA |
| Gm18877 | 0 NA | NA | NA | NA | NA |
| Gm18878 | 0 NA | NA | NA | NA | NA |
| Gm18879 | 0 NA | NA | NA | NA | NA |
| Gm18883 | 0 NA | NA | NA | NA | NA |
| Gm18884 | 0 NA | NA | NA | NA | NA |
| Gm18885 | 0 NA | NA | NA | NA | NA |
| Gm18889 | 0 NA | NA | NA | NA | NA |
| Gm18891 | 0 NA | NA | NA | NA | NA |
| Gm18892 | 0 NA | NA | NA | NA | NA |
| Gm18893 | 0 NA | NA | NA | NA | NA |
| Gm18894 | 0 NA | NA | NA | NA | NA |
| Gm18899 | 0 NA | NA | NA | NA | NA |
| Gm18900 | 0 NA | NA | NA | NA | NA |
| Gm18903 | 0 NA | NA | NA | NA | NA |
| Gm18904 | 0 NA | NA | NA | NA | NA |
| Gm18905 | 0 NA | NA | NA | NA | NA |
| Gm18907 | 0 NA | NA | NA | NA | NA |
| Gm18908 | 0 NA | NA | NA | NA | NA |
| Gm18909 | 0 NA | NA | NA | NA | NA |
| Gm18914 | 0 NA | NA | NA | NA | NA |
| Gm18916 | 0 NA | NA | NA | NA | NA |
| Gm18921 | 0 NA | NA | NA | NA | NA |
| Gm18924 | 0 NA | NA | NA | NA | NA |
| Gm18926 | 0 NA | NA | NA | NA | NA |
| Gm18927 | 0 NA | NA | NA | NA | NA |
| Gm18930 | 0 NA | NA | NA | NA | NA |
| Gm18934 | 0 NA | NA | NA | NA | NA |
| Gm18935 | 0 NA | NA | NA | NA | NA |
| Gm18940 | 0 NA | NA | NA | NA | NA |
| Gm18944 | 0 NA | NA | NA | NA | NA |
| Gm18949 | 0 NA | NA | NA | NA | NA |
| Gm18952 | 0 NA | NA | NA | NA | NA |
| Gm18953 | 0 NA | NA | NA | NA | NA |
| Gm18954 | 0 NA | NA | NA | NA | NA |
| Gm18956 | 0 NA | NA | NA | NA | NA |
| Gm18957 | 0 NA | NA | NA | NA | NA |
| Gm18959 | 0 NA | NA | NA | NA | NA |
| Gm18960 | 0 NA | NA | NA | NA | NA |
| Gm18962 | 0 NA | NA | NA | NA | NA |
| Gm18964 | 0 NA | NA | NA | NA | NA |
| Gm18968 | 0 NA | NA | NA | NA | NA |
| Gm18970 | 0 NA | NA | NA | NA | NA |
| Gm18971 | 0 NA | NA | NA | NA | NA |
| Gm18973 | 0 NA | NA | NA | NA | NA |
| Gm18974 | 0 NA | NA | NA | NA | NA |



|         |      |    |    |    |    |
|---------|------|----|----|----|----|
| Gm18977 | 0 NA | NA | NA | NA | NA |
| Gm18979 | 0 NA | NA | NA | NA | NA |
| Gm18980 | 0 NA | NA | NA | NA | NA |
| Gm18981 | 0 NA | NA | NA | NA | NA |
| Gm18982 | 0 NA | NA | NA | NA | NA |
| Gm18984 | 0 NA | NA | NA | NA | NA |
| Gm18986 | 0 NA | NA | NA | NA | NA |
| Gm18988 | 0 NA | NA | NA | NA | NA |
| Gm18991 | 0 NA | NA | NA | NA | NA |
| Gm18994 | 0 NA | NA | NA | NA | NA |
| Gm18995 | 0 NA | NA | NA | NA | NA |
| Gm19002 | 0 NA | NA | NA | NA | NA |
| Gm19005 | 0 NA | NA | NA | NA | NA |
| Gm19009 | 0 NA | NA | NA | NA | NA |
| Gm19010 | 0 NA | NA | NA | NA | NA |
| Gm19011 | 0 NA | NA | NA | NA | NA |
| Gm19013 | 0 NA | NA | NA | NA | NA |
| Gm19018 | 0 NA | NA | NA | NA | NA |
| Gm19026 | 0 NA | NA | NA | NA | NA |
| Gm19028 | 0 NA | NA | NA | NA | NA |
| Gm19030 | 0 NA | NA | NA | NA | NA |
| Gm19031 | 0 NA | NA | NA | NA | NA |
| Gm19032 | 0 NA | NA | NA | NA | NA |
| Gm19033 | 0 NA | NA | NA | NA | NA |
| Gm19034 | 0 NA | NA | NA | NA | NA |
| Gm19039 | 0 NA | NA | NA | NA | NA |
| Gm19045 | 0 NA | NA | NA | NA | NA |
| Gm19047 | 0 NA | NA | NA | NA | NA |
| Gm19050 | 0 NA | NA | NA | NA | NA |
| Gm19057 | 0 NA | NA | NA | NA | NA |
| Gm19060 | 0 NA | NA | NA | NA | NA |
| Gm19073 | 0 NA | NA | NA | NA | NA |
| Gm19074 | 0 NA | NA | NA | NA | NA |
| Gm19077 | 0 NA | NA | NA | NA | NA |
| Gm19078 | 0 NA | NA | NA | NA | NA |
| Gm19080 | 0 NA | NA | NA | NA | NA |
| Gm19084 | 0 NA | NA | NA | NA | NA |
| Gm19086 | 0 NA | NA | NA | NA | NA |
| Gm19088 | 0 NA | NA | NA | NA | NA |
| Gm19089 | 0 NA | NA | NA | NA | NA |
| Gm19090 | 0 NA | NA | NA | NA | NA |
| Gm19091 | 0 NA | NA | NA | NA | NA |
| Gm19092 | 0 NA | NA | NA | NA | NA |
| Gm19093 | 0 NA | NA | NA | NA | NA |
| Gm19094 | 0 NA | NA | NA | NA | NA |
| Gm19095 | 0 NA | NA | NA | NA | NA |
| Gm19096 | 0 NA | NA | NA | NA | NA |
| Gm19097 | 0 NA | NA | NA | NA | NA |
| Gm19099 | 0 NA | NA | NA | NA | NA |
| Gm19104 | 0 NA | NA | NA | NA | NA |
| Gm19108 | 0 NA | NA | NA | NA | NA |
| Gm19109 | 0 NA | NA | NA | NA | NA |
| Gm19111 | 0 NA | NA | NA | NA | NA |
| Gm19114 | 0 NA | NA | NA | NA | NA |
| Gm19116 | 0 NA | NA | NA | NA | NA |
| Gm19118 | 0 NA | NA | NA | NA | NA |
| Gm19119 | 0 NA | NA | NA | NA | NA |
| Gm19121 | 0 NA | NA | NA | NA | NA |
| Gm19123 | 0 NA | NA | NA | NA | NA |
| Gm19124 | 0 NA | NA | NA | NA | NA |
| Gm19125 | 0 NA | NA | NA | NA | NA |
| Gm19126 | 0 NA | NA | NA | NA | NA |
| Gm19127 | 0 NA | NA | NA | NA | NA |
| Gm19134 | 0 NA | NA | NA | NA | NA |
| Gm19136 | 0 NA | NA | NA | NA | NA |
| Gm19137 | 0 NA | NA | NA | NA | NA |

|         |      |    |    |    |    |
|---------|------|----|----|----|----|
| Gm19140 | 0 NA | NA | NA | NA | NA |
| Gm19141 | 0 NA | NA | NA | NA | NA |
| Gm19146 | 0 NA | NA | NA | NA | NA |
| Gm19147 | 0 NA | NA | NA | NA | NA |
| Gm19148 | 0 NA | NA | NA | NA | NA |
| Gm19153 | 0 NA | NA | NA | NA | NA |
| Gm19156 | 0 NA | NA | NA | NA | NA |
| Gm19157 | 0 NA | NA | NA | NA | NA |
| Gm19158 | 0 NA | NA | NA | NA | NA |
| Gm19161 | 0 NA | NA | NA | NA | NA |
| Gm19163 | 0 NA | NA | NA | NA | NA |
| Gm19164 | 0 NA | NA | NA | NA | NA |
| Gm19165 | 0 NA | NA | NA | NA | NA |
| Gm19169 | 0 NA | NA | NA | NA | NA |
| Gm19170 | 0 NA | NA | NA | NA | NA |
| Gm19172 | 0 NA | NA | NA | NA | NA |
| Gm19173 | 0 NA | NA | NA | NA | NA |
| Gm19174 | 0 NA | NA | NA | NA | NA |
| Gm19175 | 0 NA | NA | NA | NA | NA |
| Gm19177 | 0 NA | NA | NA | NA | NA |
| Gm19178 | 0 NA | NA | NA | NA | NA |
| Gm19182 | 0 NA | NA | NA | NA | NA |
| Gm19184 | 0 NA | NA | NA | NA | NA |
| Gm19185 | 0 NA | NA | NA | NA | NA |
| Gm19186 | 0 NA | NA | NA | NA | NA |
| Gm19187 | 0 NA | NA | NA | NA | NA |
| Gm19189 | 0 NA | NA | NA | NA | NA |
| Gm19193 | 0 NA | NA | NA | NA | NA |
| Gm19198 | 0 NA | NA | NA | NA | NA |
| Gm19199 | 0 NA | NA | NA | NA | NA |
| Gm19200 | 0 NA | NA | NA | NA | NA |
| Gm19201 | 0 NA | NA | NA | NA | NA |
| Gm19206 | 0 NA | NA | NA | NA | NA |
| Gm19207 | 0 NA | NA | NA | NA | NA |
| Gm19208 | 0 NA | NA | NA | NA | NA |
| Gm19214 | 0 NA | NA | NA | NA | NA |
| Gm19216 | 0 NA | NA | NA | NA | NA |
| Gm19217 | 0 NA | NA | NA | NA | NA |
| Gm19219 | 0 NA | NA | NA | NA | NA |
| Gm19222 | 0 NA | NA | NA | NA | NA |
| Gm19223 | 0 NA | NA | NA | NA | NA |
| Gm19224 | 0 NA | NA | NA | NA | NA |
| Gm19227 | 0 NA | NA | NA | NA | NA |
| Gm19228 | 0 NA | NA | NA | NA | NA |
| Gm19231 | 0 NA | NA | NA | NA | NA |
| Gm19232 | 0 NA | NA | NA | NA | NA |
| Gm19233 | 0 NA | NA | NA | NA | NA |
| Gm19235 | 0 NA | NA | NA | NA | NA |
| Gm19237 | 0 NA | NA | NA | NA | NA |
| Gm19243 | 0 NA | NA | NA | NA | NA |
| Gm19248 | 0 NA | NA | NA | NA | NA |
| Gm19252 | 0 NA | NA | NA | NA | NA |
| Gm19254 | 0 NA | NA | NA | NA | NA |
| Gm19256 | 0 NA | NA | NA | NA | NA |
| Gm19257 | 0 NA | NA | NA | NA | NA |
| Gm19267 | 0 NA | NA | NA | NA | NA |
| Gm19280 | 0 NA | NA | NA | NA | NA |
| Gm19287 | 0 NA | NA | NA | NA | NA |
| Gm19290 | 0 NA | NA | NA | NA | NA |
| Gm19309 | 0 NA | NA | NA | NA | NA |
| Gm19311 | 0 NA | NA | NA | NA | NA |
| Gm19320 | 0 NA | NA | NA | NA | NA |
| Gm19324 | 0 NA | NA | NA | NA | NA |
| Gm19326 | 0 NA | NA | NA | NA | NA |
| Gm19366 | 0 NA | NA | NA | NA | NA |
| Gm19371 | 0 NA | NA | NA | NA | NA |

|         |      |    |    |    |    |
|---------|------|----|----|----|----|
| Gm19402 | 0 NA | NA | NA | NA | NA |
| Gm19418 | 0 NA | NA | NA | NA | NA |
| Gm19441 | 0 NA | NA | NA | NA | NA |
| Gm19457 | 0 NA | NA | NA | NA | NA |
| Gm19459 | 0 NA | NA | NA | NA | NA |
| Gm1947  | 0 NA | NA | NA | NA | NA |
| Gm19480 | 0 NA | NA | NA | NA | NA |
| Gm19498 | 0 NA | NA | NA | NA | NA |
| Gm19503 | 0 NA | NA | NA | NA | NA |
| Gm19540 | 0 NA | NA | NA | NA | NA |
| Gm19560 | 0 NA | NA | NA | NA | NA |
| Gm19563 | 0 NA | NA | NA | NA | NA |
| Gm19566 | 0 NA | NA | NA | NA | NA |
| Gm19572 | 0 NA | NA | NA | NA | NA |
| Gm19596 | 0 NA | NA | NA | NA | NA |
| Gm19599 | 0 NA | NA | NA | NA | NA |
| Gm19611 | 0 NA | NA | NA | NA | NA |
| Gm19612 | 0 NA | NA | NA | NA | NA |
| Gm19617 | 0 NA | NA | NA | NA | NA |
| Gm19624 | 0 NA | NA | NA | NA | NA |
| Gm19640 | 0 NA | NA | NA | NA | NA |
| Gm19641 | 0 NA | NA | NA | NA | NA |
| Gm19653 | 0 NA | NA | NA | NA | NA |
| Gm19668 | 0 NA | NA | NA | NA | NA |
| Gm19683 | 0 NA | NA | NA | NA | NA |
| Gm19694 | 0 NA | NA | NA | NA | NA |
| Gm19709 | 0 NA | NA | NA | NA | NA |
| Gm19726 | 0 NA | NA | NA | NA | NA |
| Gm19739 | 0 NA | NA | NA | NA | NA |
| Gm19761 | 0 NA | NA | NA | NA | NA |
| Gm19764 | 0 NA | NA | NA | NA | NA |
| Gm19774 | 0 NA | NA | NA | NA | NA |
| Gm19777 | 0 NA | NA | NA | NA | NA |
| Gm19786 | 0 NA | NA | NA | NA | NA |
| Gm19790 | 0 NA | NA | NA | NA | NA |
| Gm19791 | 0 NA | NA | NA | NA | NA |
| Gm19811 | 0 NA | NA | NA | NA | NA |
| Gm19815 | 0 NA | NA | NA | NA | NA |
| Gm1982  | 0 NA | NA | NA | NA | NA |
| Gm19829 | 0 NA | NA | NA | NA | NA |
| Gm19840 | 0 NA | NA | NA | NA | NA |
| Gm19855 | 0 NA | NA | NA | NA | NA |
| Gm1988  | 0 NA | NA | NA | NA | NA |
| Gm19880 | 0 NA | NA | NA | NA | NA |
| Gm19883 | 0 NA | NA | NA | NA | NA |
| Gm19885 | 0 NA | NA | NA | NA | NA |
| Gm1989  | 0 NA | NA | NA | NA | NA |
| Gm19891 | 0 NA | NA | NA | NA | NA |
| Gm19900 | 0 NA | NA | NA | NA | NA |
| Gm19901 | 0 NA | NA | NA | NA | NA |
| Gm19908 | 0 NA | NA | NA | NA | NA |
| Gm19921 | 0 NA | NA | NA | NA | NA |
| Gm19927 | 0 NA | NA | NA | NA | NA |
| Gm1993  | 0 NA | NA | NA | NA | NA |
| Gm19931 | 0 NA | NA | NA | NA | NA |
| Gm19932 | 0 NA | NA | NA | NA | NA |
| Gm19945 | 0 NA | NA | NA | NA | NA |
| Gm1995  | 0 NA | NA | NA | NA | NA |
| Gm19987 | 0 NA | NA | NA | NA | NA |
| Gm19989 | 0 NA | NA | NA | NA | NA |
| Gm19994 | 0 NA | NA | NA | NA | NA |
| Gm2001  | 0 NA | NA | NA | NA | NA |
| Gm2003  | 0 NA | NA | NA | NA | NA |
| Gm20049 | 0 NA | NA | NA | NA | NA |
| Gm2005  | 0 NA | NA | NA | NA | NA |
| Gm20058 | 0 NA | NA | NA | NA | NA |

|         |      |    |    |    |    |
|---------|------|----|----|----|----|
| Gm20070 | 0 NA | NA | NA | NA | NA |
| Gm20072 | 0 NA | NA | NA | NA | NA |
| Gm20074 | 0 NA | NA | NA | NA | NA |
| Gm20082 | 0 NA | NA | NA | NA | NA |
| Gm20102 | 0 NA | NA | NA | NA | NA |
| Gm20108 | 0 NA | NA | NA | NA | NA |
| Gm20118 | 0 NA | NA | NA | NA | NA |
| Gm2012  | 0 NA | NA | NA | NA | NA |
| Gm20121 | 0 NA | NA | NA | NA | NA |
| Gm20127 | 0 NA | NA | NA | NA | NA |
| Gm20128 | 0 NA | NA | NA | NA | NA |
| Gm20144 | 0 NA | NA | NA | NA | NA |
| Gm20177 | 0 NA | NA | NA | NA | NA |
| Gm2020  | 0 NA | NA | NA | NA | NA |
| Gm20203 | 0 NA | NA | NA | NA | NA |
| Gm2021  | 0 NA | NA | NA | NA | NA |
| Gm20223 | 0 NA | NA | NA | NA | NA |
| Gm20239 | 0 NA | NA | NA | NA | NA |
| Gm20241 | 0 NA | NA | NA | NA | NA |
| Gm20281 | 0 NA | NA | NA | NA | NA |
| Gm20287 | 0 NA | NA | NA | NA | NA |
| Gm20288 | 0 NA | NA | NA | NA | NA |
| Gm2030  | 0 NA | NA | NA | NA | NA |
| Gm20302 | 0 NA | NA | NA | NA | NA |
| Gm20304 | 0 NA | NA | NA | NA | NA |
| Gm20305 | 0 NA | NA | NA | NA | NA |
| Gm20345 | 0 NA | NA | NA | NA | NA |
| Gm20379 | 0 NA | NA | NA | NA | NA |
| Gm20382 | 0 NA | NA | NA | NA | NA |
| Gm20386 | 0 NA | NA | NA | NA | NA |
| Gm20392 | 0 NA | NA | NA | NA | NA |
| Gm20396 | 0 NA | NA | NA | NA | NA |
| Gm20397 | 0 NA | NA | NA | NA | NA |
| Gm20399 | 0 NA | NA | NA | NA | NA |
| Gm2040  | 0 NA | NA | NA | NA | NA |
| Gm20401 | 0 NA | NA | NA | NA | NA |
| Gm20403 | 0 NA | NA | NA | NA | NA |
| Gm20409 | 0 NA | NA | NA | NA | NA |
| Gm20414 | 0 NA | NA | NA | NA | NA |
| Gm20415 | 0 NA | NA | NA | NA | NA |
| Gm2042  | 0 NA | NA | NA | NA | NA |
| Gm20431 | 0 NA | NA | NA | NA | NA |
| Gm20441 | 0 NA | NA | NA | NA | NA |
| Gm20445 | 0 NA | NA | NA | NA | NA |
| Gm20447 | 0 NA | NA | NA | NA | NA |
| Gm20450 | 0 NA | NA | NA | NA | NA |
| Gm20451 | 0 NA | NA | NA | NA | NA |
| Gm20452 | 0 NA | NA | NA | NA | NA |
| Gm20453 | 0 NA | NA | NA | NA | NA |
| Gm20454 | 0 NA | NA | NA | NA | NA |
| Gm20462 | 0 NA | NA | NA | NA | NA |
| Gm20473 | 0 NA | NA | NA | NA | NA |
| Gm20474 | 0 NA | NA | NA | NA | NA |
| Gm20477 | 0 NA | NA | NA | NA | NA |
| Gm2048  | 0 NA | NA | NA | NA | NA |
| Gm20480 | 0 NA | NA | NA | NA | NA |
| Gm20481 | 0 NA | NA | NA | NA | NA |
| Gm20486 | 0 NA | NA | NA | NA | NA |
| Gm20489 | 0 NA | NA | NA | NA | NA |
| Gm20491 | 0 NA | NA | NA | NA | NA |
| Gm20493 | 0 NA | NA | NA | NA | NA |
| Gm20495 | 0 NA | NA | NA | NA | NA |
| Gm20525 | 0 NA | NA | NA | NA | NA |
| Gm20526 | 0 NA | NA | NA | NA | NA |
| Gm2053  | 0 NA | NA | NA | NA | NA |
| Gm20530 | 0 NA | NA | NA | NA | NA |

|         |      |    |    |    |    |
|---------|------|----|----|----|----|
| Gm20534 | 0 NA | NA | NA | NA | NA |
| Gm20542 | 0 NA | NA | NA | NA | NA |
| Gm20543 | 0 NA | NA | NA | NA | NA |
| Gm20545 | 0 NA | NA | NA | NA | NA |
| Gm20549 | 0 NA | NA | NA | NA | NA |
| Gm2056  | 0 NA | NA | NA | NA | NA |
| Gm20561 | 0 NA | NA | NA | NA | NA |
| Gm20564 | 0 NA | NA | NA | NA | NA |
| Gm20574 | 0 NA | NA | NA | NA | NA |
| Gm2058  | 0 NA | NA | NA | NA | NA |
| Gm20586 | 0 NA | NA | NA | NA | NA |
| Gm2059  | 0 NA | NA | NA | NA | NA |
| Gm20612 | 0 NA | NA | NA | NA | NA |
| Gm20613 | 0 NA | NA | NA | NA | NA |
| Gm20615 | 0 NA | NA | NA | NA | NA |
| Gm20630 | 0 NA | NA | NA | NA | NA |
| Gm20648 | 0 NA | NA | NA | NA | NA |
| Gm20651 | 0 NA | NA | NA | NA | NA |
| Gm2066  | 0 NA | NA | NA | NA | NA |
| Gm20660 | 0 NA | NA | NA | NA | NA |
| Gm20671 | 0 NA | NA | NA | NA | NA |
| Gm20672 | 0 NA | NA | NA | NA | NA |
| Gm20673 | 0 NA | NA | NA | NA | NA |
| Gm20674 | 0 NA | NA | NA | NA | NA |
| Gm20679 | 0 NA | NA | NA | NA | NA |
| Gm20689 | 0 NA | NA | NA | NA | NA |
| Gm20690 | 0 NA | NA | NA | NA | NA |
| Gm20693 | 0 NA | NA | NA | NA | NA |
| Gm20701 | 0 NA | NA | NA | NA | NA |
| Gm20706 | 0 NA | NA | NA | NA | NA |
| Gm2071  | 0 NA | NA | NA | NA | NA |
| Gm20718 | 0 NA | NA | NA | NA | NA |
| Gm20730 | 0 NA | NA | NA | NA | NA |
| Gm20734 | 0 NA | NA | NA | NA | NA |
| Gm20737 | 0 NA | NA | NA | NA | NA |
| Gm20738 | 0 NA | NA | NA | NA | NA |
| Gm20747 | 0 NA | NA | NA | NA | NA |
| Gm20749 | 0 NA | NA | NA | NA | NA |
| Gm2075  | 0 NA | NA | NA | NA | NA |
| Gm20760 | 0 NA | NA | NA | NA | NA |
| Gm20769 | 0 NA | NA | NA | NA | NA |
| Gm2077  | 0 NA | NA | NA | NA | NA |
| Gm20770 | 0 NA | NA | NA | NA | NA |
| Gm20772 | 0 NA | NA | NA | NA | NA |
| Gm20773 | 0 NA | NA | NA | NA | NA |
| Gm20775 | 0 NA | NA | NA | NA | NA |
| Gm20776 | 0 NA | NA | NA | NA | NA |
| Gm20777 | 0 NA | NA | NA | NA | NA |
| Gm20781 | 0 NA | NA | NA | NA | NA |
| Gm20786 | 0 NA | NA | NA | NA | NA |
| Gm20788 | 0 NA | NA | NA | NA | NA |
| Gm20789 | 0 NA | NA | NA | NA | NA |
| Gm20791 | 0 NA | NA | NA | NA | NA |
| Gm20792 | 0 NA | NA | NA | NA | NA |
| Gm20793 | 0 NA | NA | NA | NA | NA |
| Gm20794 | 0 NA | NA | NA | NA | NA |
| Gm20795 | 0 NA | NA | NA | NA | NA |
| Gm20797 | 0 NA | NA | NA | NA | NA |
| Gm20798 | 0 NA | NA | NA | NA | NA |
| Gm20799 | 0 NA | NA | NA | NA | NA |
| Gm2080  | 0 NA | NA | NA | NA | NA |
| Gm20800 | 0 NA | NA | NA | NA | NA |
| Gm20801 | 0 NA | NA | NA | NA | NA |
| Gm20802 | 0 NA | NA | NA | NA | NA |
| Gm20803 | 0 NA | NA | NA | NA | NA |
| Gm20804 | 0 NA | NA | NA | NA | NA |

|         |      |    |    |    |    |
|---------|------|----|----|----|----|
| Gm20805 | 0 NA | NA | NA | NA | NA |
| Gm20806 | 0 NA | NA | NA | NA | NA |
| Gm20807 | 0 NA | NA | NA | NA | NA |
| Gm20808 | 0 NA | NA | NA | NA | NA |
| Gm20809 | 0 NA | NA | NA | NA | NA |
| Gm20810 | 0 NA | NA | NA | NA | NA |
| Gm20811 | 0 NA | NA | NA | NA | NA |
| Gm20812 | 0 NA | NA | NA | NA | NA |
| Gm20813 | 0 NA | NA | NA | NA | NA |
| Gm20814 | 0 NA | NA | NA | NA | NA |
| Gm20815 | 0 NA | NA | NA | NA | NA |
| Gm20816 | 0 NA | NA | NA | NA | NA |
| Gm20817 | 0 NA | NA | NA | NA | NA |
| Gm20818 | 0 NA | NA | NA | NA | NA |
| Gm20819 | 0 NA | NA | NA | NA | NA |
| Gm20820 | 0 NA | NA | NA | NA | NA |
| Gm20821 | 0 NA | NA | NA | NA | NA |
| Gm20822 | 0 NA | NA | NA | NA | NA |
| Gm20823 | 0 NA | NA | NA | NA | NA |
| Gm20824 | 0 NA | NA | NA | NA | NA |
| Gm20825 | 0 NA | NA | NA | NA | NA |
| Gm20826 | 0 NA | NA | NA | NA | NA |
| Gm20827 | 0 NA | NA | NA | NA | NA |
| Gm20828 | 0 NA | NA | NA | NA | NA |
| Gm20830 | 0 NA | NA | NA | NA | NA |
| Gm20831 | 0 NA | NA | NA | NA | NA |
| Gm20832 | 0 NA | NA | NA | NA | NA |
| Gm20833 | 0 NA | NA | NA | NA | NA |
| Gm20834 | 0 NA | NA | NA | NA | NA |
| Gm20835 | 0 NA | NA | NA | NA | NA |
| Gm20836 | 0 NA | NA | NA | NA | NA |
| Gm20837 | 0 NA | NA | NA | NA | NA |
| Gm20838 | 0 NA | NA | NA | NA | NA |
| Gm20840 | 0 NA | NA | NA | NA | NA |
| Gm20841 | 0 NA | NA | NA | NA | NA |
| Gm20842 | 0 NA | NA | NA | NA | NA |
| Gm20844 | 0 NA | NA | NA | NA | NA |
| Gm20846 | 0 NA | NA | NA | NA | NA |
| Gm20847 | 0 NA | NA | NA | NA | NA |
| Gm20848 | 0 NA | NA | NA | NA | NA |
| Gm20849 | 0 NA | NA | NA | NA | NA |
| Gm20850 | 0 NA | NA | NA | NA | NA |
| Gm20851 | 0 NA | NA | NA | NA | NA |
| Gm20852 | 0 NA | NA | NA | NA | NA |
| Gm20853 | 0 NA | NA | NA | NA | NA |
| Gm20854 | 0 NA | NA | NA | NA | NA |
| Gm20855 | 0 NA | NA | NA | NA | NA |
| Gm20856 | 0 NA | NA | NA | NA | NA |
| Gm20857 | 0 NA | NA | NA | NA | NA |
| Gm20858 | 0 NA | NA | NA | NA | NA |
| Gm20859 | 0 NA | NA | NA | NA | NA |
| Gm20860 | 0 NA | NA | NA | NA | NA |
| Gm20861 | 0 NA | NA | NA | NA | NA |
| Gm20862 | 0 NA | NA | NA | NA | NA |
| Gm20863 | 0 NA | NA | NA | NA | NA |
| Gm20864 | 0 NA | NA | NA | NA | NA |
| Gm20865 | 0 NA | NA | NA | NA | NA |
| Gm20866 | 0 NA | NA | NA | NA | NA |
| Gm20867 | 0 NA | NA | NA | NA | NA |
| Gm20868 | 0 NA | NA | NA | NA | NA |
| Gm20869 | 0 NA | NA | NA | NA | NA |
| Gm20870 | 0 NA | NA | NA | NA | NA |
| Gm20873 | 0 NA | NA | NA | NA | NA |
| Gm20874 | 0 NA | NA | NA | NA | NA |
| Gm20877 | 0 NA | NA | NA | NA | NA |
| Gm20879 | 0 NA | NA | NA | NA | NA |

|         |      |    |    |    |    |
|---------|------|----|----|----|----|
| Gm20880 | 0 NA | NA | NA | NA | NA |
| Gm20881 | 0 NA | NA | NA | NA | NA |
| Gm20882 | 0 NA | NA | NA | NA | NA |
| Gm20883 | 0 NA | NA | NA | NA | NA |
| Gm20884 | 0 NA | NA | NA | NA | NA |
| Gm20885 | 0 NA | NA | NA | NA | NA |
| Gm20886 | 0 NA | NA | NA | NA | NA |
| Gm20887 | 0 NA | NA | NA | NA | NA |
| Gm20888 | 0 NA | NA | NA | NA | NA |
| Gm20889 | 0 NA | NA | NA | NA | NA |
| Gm2089  | 0 NA | NA | NA | NA | NA |
| Gm20890 | 0 NA | NA | NA | NA | NA |
| Gm20891 | 0 NA | NA | NA | NA | NA |
| Gm20892 | 0 NA | NA | NA | NA | NA |
| Gm20893 | 0 NA | NA | NA | NA | NA |
| Gm20894 | 0 NA | NA | NA | NA | NA |
| Gm20895 | 0 NA | NA | NA | NA | NA |
| Gm20896 | 0 NA | NA | NA | NA | NA |
| Gm20897 | 0 NA | NA | NA | NA | NA |
| Gm20898 | 0 NA | NA | NA | NA | NA |
| Gm20901 | 0 NA | NA | NA | NA | NA |
| Gm20902 | 0 NA | NA | NA | NA | NA |
| Gm20903 | 0 NA | NA | NA | NA | NA |
| Gm20904 | 0 NA | NA | NA | NA | NA |
| Gm20905 | 0 NA | NA | NA | NA | NA |
| Gm20906 | 0 NA | NA | NA | NA | NA |
| Gm20907 | 0 NA | NA | NA | NA | NA |
| Gm20908 | 0 NA | NA | NA | NA | NA |
| Gm20909 | 0 NA | NA | NA | NA | NA |
| Gm20910 | 0 NA | NA | NA | NA | NA |
| Gm20911 | 0 NA | NA | NA | NA | NA |
| Gm20912 | 0 NA | NA | NA | NA | NA |
| Gm20913 | 0 NA | NA | NA | NA | NA |
| Gm20914 | 0 NA | NA | NA | NA | NA |
| Gm20915 | 0 NA | NA | NA | NA | NA |
| Gm20916 | 0 NA | NA | NA | NA | NA |
| Gm20917 | 0 NA | NA | NA | NA | NA |
| Gm20918 | 0 NA | NA | NA | NA | NA |
| Gm20919 | 0 NA | NA | NA | NA | NA |
| Gm2092  | 0 NA | NA | NA | NA | NA |
| Gm20920 | 0 NA | NA | NA | NA | NA |
| Gm20921 | 0 NA | NA | NA | NA | NA |
| Gm20922 | 0 NA | NA | NA | NA | NA |
| Gm20923 | 0 NA | NA | NA | NA | NA |
| Gm20924 | 0 NA | NA | NA | NA | NA |
| Gm20925 | 0 NA | NA | NA | NA | NA |
| Gm20926 | 0 NA | NA | NA | NA | NA |
| Gm20927 | 0 NA | NA | NA | NA | NA |
| Gm20928 | 0 NA | NA | NA | NA | NA |
| Gm20929 | 0 NA | NA | NA | NA | NA |
| Gm20930 | 0 NA | NA | NA | NA | NA |
| Gm20931 | 0 NA | NA | NA | NA | NA |
| Gm20932 | 0 NA | NA | NA | NA | NA |
| Gm20933 | 0 NA | NA | NA | NA | NA |
| Gm20934 | 0 NA | NA | NA | NA | NA |
| Gm20935 | 0 NA | NA | NA | NA | NA |
| Gm20936 | 0 NA | NA | NA | NA | NA |
| Gm20940 | 0 NA | NA | NA | NA | NA |
| Gm20948 | 0 NA | NA | NA | NA | NA |
| Gm20949 | 0 NA | NA | NA | NA | NA |
| Gm20953 | 0 NA | NA | NA | NA | NA |
| Gm20954 | 0 NA | NA | NA | NA | NA |
| Gm20997 | 0 NA | NA | NA | NA | NA |
| Gm21006 | 0 NA | NA | NA | NA | NA |
| Gm21007 | 0 NA | NA | NA | NA | NA |
| Gm21009 | 0 NA | NA | NA | NA | NA |

|         |      |    |    |    |    |
|---------|------|----|----|----|----|
| Gm21010 | 0 NA | NA | NA | NA | NA |
| Gm21013 | 0 NA | NA | NA | NA | NA |
| Gm21021 | 0 NA | NA | NA | NA | NA |
| Gm21026 | 0 NA | NA | NA | NA | NA |
| Gm21028 | 0 NA | NA | NA | NA | NA |
| Gm21033 | 0 NA | NA | NA | NA | NA |
| Gm21034 | 0 NA | NA | NA | NA | NA |
| Gm21035 | 0 NA | NA | NA | NA | NA |
| Gm21036 | 0 NA | NA | NA | NA | NA |
| Gm21038 | 0 NA | NA | NA | NA | NA |
| Gm21039 | 0 NA | NA | NA | NA | NA |
| Gm21040 | 0 NA | NA | NA | NA | NA |
| Gm21043 | 0 NA | NA | NA | NA | NA |
| Gm21045 | 0 NA | NA | NA | NA | NA |
| Gm21048 | 0 NA | NA | NA | NA | NA |
| Gm21051 | 0 NA | NA | NA | NA | NA |
| Gm21054 | 0 NA | NA | NA | NA | NA |
| Gm21065 | 0 NA | NA | NA | NA | NA |
| Gm21070 | 0 NA | NA | NA | NA | NA |
| Gm21076 | 0 NA | NA | NA | NA | NA |
| Gm2108  | 0 NA | NA | NA | NA | NA |
| Gm21088 | 0 NA | NA | NA | NA | NA |
| Gm21089 | 0 NA | NA | NA | NA | NA |
| Gm21094 | 0 NA | NA | NA | NA | NA |
| Gm21095 | 0 NA | NA | NA | NA | NA |
| Gm21103 | 0 NA | NA | NA | NA | NA |
| Gm21111 | 0 NA | NA | NA | NA | NA |
| Gm21112 | 0 NA | NA | NA | NA | NA |
| Gm21114 | 0 NA | NA | NA | NA | NA |
| Gm21115 | 0 NA | NA | NA | NA | NA |
| Gm21117 | 0 NA | NA | NA | NA | NA |
| Gm21118 | 0 NA | NA | NA | NA | NA |
| Gm21122 | 0 NA | NA | NA | NA | NA |
| Gm21127 | 0 NA | NA | NA | NA | NA |
| Gm21129 | 0 NA | NA | NA | NA | NA |
| Gm21135 | 0 NA | NA | NA | NA | NA |
| Gm21136 | 0 NA | NA | NA | NA | NA |
| Gm21139 | 0 NA | NA | NA | NA | NA |
| Gm21142 | 0 NA | NA | NA | NA | NA |
| Gm21147 | 0 NA | NA | NA | NA | NA |
| Gm21149 | 0 NA | NA | NA | NA | NA |
| Gm21151 | 0 NA | NA | NA | NA | NA |
| Gm21152 | 0 NA | NA | NA | NA | NA |
| Gm21155 | 0 NA | NA | NA | NA | NA |
| Gm21160 | 0 NA | NA | NA | NA | NA |
| Gm21163 | 0 NA | NA | NA | NA | NA |
| Gm21168 | 0 NA | NA | NA | NA | NA |
| Gm21171 | 0 NA | NA | NA | NA | NA |
| Gm21173 | 0 NA | NA | NA | NA | NA |
| Gm21180 | 0 NA | NA | NA | NA | NA |
| Gm21181 | 0 NA | NA | NA | NA | NA |
| Gm21184 | 0 NA | NA | NA | NA | NA |
| Gm21190 | 0 NA | NA | NA | NA | NA |
| Gm21191 | 0 NA | NA | NA | NA | NA |
| Gm21198 | 0 NA | NA | NA | NA | NA |
| Gm21201 | 0 NA | NA | NA | NA | NA |
| Gm21232 | 0 NA | NA | NA | NA | NA |
| Gm21241 | 0 NA | NA | NA | NA | NA |
| Gm21242 | 0 NA | NA | NA | NA | NA |
| Gm21245 | 0 NA | NA | NA | NA | NA |
| Gm21247 | 0 NA | NA | NA | NA | NA |
| Gm21248 | 0 NA | NA | NA | NA | NA |
| Gm21249 | 0 NA | NA | NA | NA | NA |
| Gm21256 | 0 NA | NA | NA | NA | NA |
| Gm21257 | 0 NA | NA | NA | NA | NA |
| Gm21268 | 0 NA | NA | NA | NA | NA |



|         |      |    |    |    |    |
|---------|------|----|----|----|----|
| Gm21271 | 0 NA | NA | NA | NA | NA |
| Gm21275 | 0 NA | NA | NA | NA | NA |
| Gm21276 | 0 NA | NA | NA | NA | NA |
| Gm2128  | 0 NA | NA | NA | NA | NA |
| Gm21281 | 0 NA | NA | NA | NA | NA |
| Gm21282 | 0 NA | NA | NA | NA | NA |
| Gm21285 | 0 NA | NA | NA | NA | NA |
| Gm21286 | 0 NA | NA | NA | NA | NA |
| Gm21287 | 0 NA | NA | NA | NA | NA |
| Gm21292 | 0 NA | NA | NA | NA | NA |
| Gm21294 | 0 NA | NA | NA | NA | NA |
| Gm21297 | 0 NA | NA | NA | NA | NA |
| Gm21301 | 0 NA | NA | NA | NA | NA |
| Gm21302 | 0 NA | NA | NA | NA | NA |
| Gm21308 | 0 NA | NA | NA | NA | NA |
| Gm21310 | 0 NA | NA | NA | NA | NA |
| Gm21316 | 0 NA | NA | NA | NA | NA |
| Gm21317 | 0 NA | NA | NA | NA | NA |
| Gm21321 | 0 NA | NA | NA | NA | NA |
| Gm21330 | 0 NA | NA | NA | NA | NA |
| Gm21333 | 0 NA | NA | NA | NA | NA |
| Gm21340 | 0 NA | NA | NA | NA | NA |
| Gm21344 | 0 NA | NA | NA | NA | NA |
| Gm21350 | 0 NA | NA | NA | NA | NA |
| Gm21358 | 0 NA | NA | NA | NA | NA |
| Gm21362 | 0 NA | NA | NA | NA | NA |
| Gm21366 | 0 NA | NA | NA | NA | NA |
| Gm21370 | 0 NA | NA | NA | NA | NA |
| Gm21380 | 0 NA | NA | NA | NA | NA |
| Gm21387 | 0 NA | NA | NA | NA | NA |
| Gm21392 | 0 NA | NA | NA | NA | NA |
| Gm21394 | 0 NA | NA | NA | NA | NA |
| Gm21396 | 0 NA | NA | NA | NA | NA |
| Gm2140  | 0 NA | NA | NA | NA | NA |
| Gm21405 | 0 NA | NA | NA | NA | NA |
| Gm21409 | 0 NA | NA | NA | NA | NA |
| Gm21411 | 0 NA | NA | NA | NA | NA |
| Gm21412 | 0 NA | NA | NA | NA | NA |
| Gm2142  | 0 NA | NA | NA | NA | NA |
| Gm21425 | 0 NA | NA | NA | NA | NA |
| Gm21427 | 0 NA | NA | NA | NA | NA |
| Gm21430 | 0 NA | NA | NA | NA | NA |
| Gm21435 | 0 NA | NA | NA | NA | NA |
| Gm21440 | 0 NA | NA | NA | NA | NA |
| Gm21443 | 0 NA | NA | NA | NA | NA |
| Gm21454 | 0 NA | NA | NA | NA | NA |
| Gm21461 | 0 NA | NA | NA | NA | NA |
| Gm21462 | 0 NA | NA | NA | NA | NA |
| Gm21469 | 0 NA | NA | NA | NA | NA |
| Gm2147  | 0 NA | NA | NA | NA | NA |
| Gm21470 | 0 NA | NA | NA | NA | NA |
| Gm21476 | 0 NA | NA | NA | NA | NA |
| Gm21477 | 0 NA | NA | NA | NA | NA |
| Gm21488 | 0 NA | NA | NA | NA | NA |
| Gm21489 | 0 NA | NA | NA | NA | NA |
| Gm21497 | 0 NA | NA | NA | NA | NA |
| Gm2150  | 0 NA | NA | NA | NA | NA |
| Gm21506 | 0 NA | NA | NA | NA | NA |
| Gm21524 | 0 NA | NA | NA | NA | NA |
| Gm21530 | 0 NA | NA | NA | NA | NA |
| Gm21559 | 0 NA | NA | NA | NA | NA |
| Gm21569 | 0 NA | NA | NA | NA | NA |
| Gm2157  | 0 NA | NA | NA | NA | NA |
| Gm21573 | 0 NA | NA | NA | NA | NA |
| Gm21577 | 0 NA | NA | NA | NA | NA |
| Gm21586 | 0 NA | NA | NA | NA | NA |

|         |      |    |    |    |    |
|---------|------|----|----|----|----|
| Gm21614 | 0 NA | NA | NA | NA | NA |
| Gm21617 | 0 NA | NA | NA | NA | NA |
| Gm21631 | 0 NA | NA | NA | NA | NA |
| Gm21634 | 0 NA | NA | NA | NA | NA |
| Gm21637 | 0 NA | NA | NA | NA | NA |
| Gm21638 | 0 NA | NA | NA | NA | NA |
| Gm21642 | 0 NA | NA | NA | NA | NA |
| Gm21647 | 0 NA | NA | NA | NA | NA |
| Gm21654 | 0 NA | NA | NA | NA | NA |
| Gm21658 | 0 NA | NA | NA | NA | NA |
| Gm21660 | 0 NA | NA | NA | NA | NA |
| Gm21661 | 0 NA | NA | NA | NA | NA |
| Gm21663 | 0 NA | NA | NA | NA | NA |
| Gm21672 | 0 NA | NA | NA | NA | NA |
| Gm21673 | 0 NA | NA | NA | NA | NA |
| Gm21677 | 0 NA | NA | NA | NA | NA |
| Gm21678 | 0 NA | NA | NA | NA | NA |
| Gm21679 | 0 NA | NA | NA | NA | NA |
| Gm21683 | 0 NA | NA | NA | NA | NA |
| Gm21693 | 0 NA | NA | NA | NA | NA |
| Gm21698 | 0 NA | NA | NA | NA | NA |
| Gm21704 | 0 NA | NA | NA | NA | NA |
| Gm21708 | 0 NA | NA | NA | NA | NA |
| Gm21715 | 0 NA | NA | NA | NA | NA |
| Gm21717 | 0 NA | NA | NA | NA | NA |
| Gm21719 | 0 NA | NA | NA | NA | NA |
| Gm21720 | 0 NA | NA | NA | NA | NA |
| Gm21721 | 0 NA | NA | NA | NA | NA |
| Gm21722 | 0 NA | NA | NA | NA | NA |
| Gm21724 | 0 NA | NA | NA | NA | NA |
| Gm21725 | 0 NA | NA | NA | NA | NA |
| Gm21726 | 0 NA | NA | NA | NA | NA |
| Gm21728 | 0 NA | NA | NA | NA | NA |
| Gm21729 | 0 NA | NA | NA | NA | NA |
| Gm21731 | 0 NA | NA | NA | NA | NA |
| Gm21733 | 0 NA | NA | NA | NA | NA |
| Gm21734 | 0 NA | NA | NA | NA | NA |
| Gm21735 | 0 NA | NA | NA | NA | NA |
| Gm21736 | 0 NA | NA | NA | NA | NA |
| Gm21737 | 0 NA | NA | NA | NA | NA |
| Gm21738 | 0 NA | NA | NA | NA | NA |
| Gm21739 | 0 NA | NA | NA | NA | NA |
| Gm2174  | 0 NA | NA | NA | NA | NA |
| Gm21740 | 0 NA | NA | NA | NA | NA |
| Gm21741 | 0 NA | NA | NA | NA | NA |
| Gm21744 | 0 NA | NA | NA | NA | NA |
| Gm21745 | 0 NA | NA | NA | NA | NA |
| Gm21749 | 0 NA | NA | NA | NA | NA |
| Gm21751 | 0 NA | NA | NA | NA | NA |
| Gm21752 | 0 NA | NA | NA | NA | NA |
| Gm21753 | 0 NA | NA | NA | NA | NA |
| Gm21754 | 0 NA | NA | NA | NA | NA |
| Gm21755 | 0 NA | NA | NA | NA | NA |
| Gm21756 | 0 NA | NA | NA | NA | NA |
| Gm21757 | 0 NA | NA | NA | NA | NA |
| Gm21758 | 0 NA | NA | NA | NA | NA |
| Gm21759 | 0 NA | NA | NA | NA | NA |
| Gm21760 | 0 NA | NA | NA | NA | NA |
| Gm21763 | 0 NA | NA | NA | NA | NA |
| Gm21764 | 0 NA | NA | NA | NA | NA |
| Gm21765 | 0 NA | NA | NA | NA | NA |
| Gm21766 | 0 NA | NA | NA | NA | NA |
| Gm21767 | 0 NA | NA | NA | NA | NA |
| Gm21768 | 0 NA | NA | NA | NA | NA |
| Gm21771 | 0 NA | NA | NA | NA | NA |
| Gm21772 | 0 NA | NA | NA | NA | NA |

|         |      |    |    |    |    |
|---------|------|----|----|----|----|
| Gm21773 | 0 NA | NA | NA | NA | NA |
| Gm21774 | 0 NA | NA | NA | NA | NA |
| Gm21776 | 0 NA | NA | NA | NA | NA |
| Gm21777 | 0 NA | NA | NA | NA | NA |
| Gm21779 | 0 NA | NA | NA | NA | NA |
| Gm21782 | 0 NA | NA | NA | NA | NA |
| Gm21783 | 0 NA | NA | NA | NA | NA |
| Gm21784 | 0 NA | NA | NA | NA | NA |
| Gm21785 | 0 NA | NA | NA | NA | NA |
| Gm21787 | 0 NA | NA | NA | NA | NA |
| Gm21790 | 0 NA | NA | NA | NA | NA |
| Gm21791 | 0 NA | NA | NA | NA | NA |
| Gm21792 | 0 NA | NA | NA | NA | NA |
| Gm21794 | 0 NA | NA | NA | NA | NA |
| Gm21795 | 0 NA | NA | NA | NA | NA |
| Gm21796 | 0 NA | NA | NA | NA | NA |
| Gm21797 | 0 NA | NA | NA | NA | NA |
| Gm21799 | 0 NA | NA | NA | NA | NA |
| Gm21800 | 0 NA | NA | NA | NA | NA |
| Gm21802 | 0 NA | NA | NA | NA | NA |
| Gm21803 | 0 NA | NA | NA | NA | NA |
| Gm21804 | 0 NA | NA | NA | NA | NA |
| Gm21805 | 0 NA | NA | NA | NA | NA |
| Gm21806 | 0 NA | NA | NA | NA | NA |
| Gm21808 | 0 NA | NA | NA | NA | NA |
| Gm21810 | 0 NA | NA | NA | NA | NA |
| Gm21812 | 0 NA | NA | NA | NA | NA |
| Gm21813 | 0 NA | NA | NA | NA | NA |
| Gm21815 | 0 NA | NA | NA | NA | NA |
| Gm21819 | 0 NA | NA | NA | NA | NA |
| Gm2182  | 0 NA | NA | NA | NA | NA |
| Gm21820 | 0 NA | NA | NA | NA | NA |
| Gm21822 | 0 NA | NA | NA | NA | NA |
| Gm21823 | 0 NA | NA | NA | NA | NA |
| Gm21824 | 0 NA | NA | NA | NA | NA |
| Gm21825 | 0 NA | NA | NA | NA | NA |
| Gm21826 | 0 NA | NA | NA | NA | NA |
| Gm21828 | 0 NA | NA | NA | NA | NA |
| Gm21829 | 0 NA | NA | NA | NA | NA |
| Gm21834 | 0 NA | NA | NA | NA | NA |
| Gm21835 | 0 NA | NA | NA | NA | NA |
| Gm21836 | 0 NA | NA | NA | NA | NA |
| Gm21837 | 0 NA | NA | NA | NA | NA |
| Gm21838 | 0 NA | NA | NA | NA | NA |
| Gm21839 | 0 NA | NA | NA | NA | NA |
| Gm21840 | 0 NA | NA | NA | NA | NA |
| Gm21841 | 0 NA | NA | NA | NA | NA |
| Gm21843 | 0 NA | NA | NA | NA | NA |
| Gm21845 | 0 NA | NA | NA | NA | NA |
| Gm21848 | 0 NA | NA | NA | NA | NA |
| Gm21849 | 0 NA | NA | NA | NA | NA |
| Gm21850 | 0 NA | NA | NA | NA | NA |
| Gm21851 | 0 NA | NA | NA | NA | NA |
| Gm21853 | 0 NA | NA | NA | NA | NA |
| Gm21855 | 0 NA | NA | NA | NA | NA |
| Gm21856 | 0 NA | NA | NA | NA | NA |
| Gm21858 | 0 NA | NA | NA | NA | NA |
| Gm21861 | 0 NA | NA | NA | NA | NA |
| Gm21862 | 0 NA | NA | NA | NA | NA |
| Gm21863 | 0 NA | NA | NA | NA | NA |
| Gm21864 | 0 NA | NA | NA | NA | NA |
| Gm21865 | 0 NA | NA | NA | NA | NA |
| Gm21866 | 0 NA | NA | NA | NA | NA |
| Gm21867 | 0 NA | NA | NA | NA | NA |
| Gm21868 | 0 NA | NA | NA | NA | NA |
| Gm21869 | 0 NA | NA | NA | NA | NA |

|         |      |    |    |    |    |
|---------|------|----|----|----|----|
| Gm21870 | 0 NA | NA | NA | NA | NA |
| Gm21871 | 0 NA | NA | NA | NA | NA |
| Gm21872 | 0 NA | NA | NA | NA | NA |
| Gm21873 | 0 NA | NA | NA | NA | NA |
| Gm21874 | 0 NA | NA | NA | NA | NA |
| Gm21875 | 0 NA | NA | NA | NA | NA |
| Gm21876 | 0 NA | NA | NA | NA | NA |
| Gm21877 | 0 NA | NA | NA | NA | NA |
| Gm21878 | 0 NA | NA | NA | NA | NA |
| Gm21879 | 0 NA | NA | NA | NA | NA |
| Gm21880 | 0 NA | NA | NA | NA | NA |
| Gm21881 | 0 NA | NA | NA | NA | NA |
| Gm21882 | 0 NA | NA | NA | NA | NA |
| Gm21886 | 0 NA | NA | NA | NA | NA |
| Gm21889 | 0 NA | NA | NA | NA | NA |
| Gm2189  | 0 NA | NA | NA | NA | NA |
| Gm21890 | 0 NA | NA | NA | NA | NA |
| Gm21891 | 0 NA | NA | NA | NA | NA |
| Gm21892 | 0 NA | NA | NA | NA | NA |
| Gm21893 | 0 NA | NA | NA | NA | NA |
| Gm21894 | 0 NA | NA | NA | NA | NA |
| Gm21895 | 0 NA | NA | NA | NA | NA |
| Gm21896 | 0 NA | NA | NA | NA | NA |
| Gm21898 | 0 NA | NA | NA | NA | NA |
| Gm21899 | 0 NA | NA | NA | NA | NA |
| Gm21901 | 0 NA | NA | NA | NA | NA |
| Gm21902 | 0 NA | NA | NA | NA | NA |
| Gm21903 | 0 NA | NA | NA | NA | NA |
| Gm21904 | 0 NA | NA | NA | NA | NA |
| Gm21905 | 0 NA | NA | NA | NA | NA |
| Gm21906 | 0 NA | NA | NA | NA | NA |
| Gm21907 | 0 NA | NA | NA | NA | NA |
| Gm21908 | 0 NA | NA | NA | NA | NA |
| Gm21910 | 0 NA | NA | NA | NA | NA |
| Gm21912 | 0 NA | NA | NA | NA | NA |
| Gm21913 | 0 NA | NA | NA | NA | NA |
| Gm21915 | 0 NA | NA | NA | NA | NA |
| Gm21918 | 0 NA | NA | NA | NA | NA |
| Gm21919 | 0 NA | NA | NA | NA | NA |
| Gm21920 | 0 NA | NA | NA | NA | NA |
| Gm21921 | 0 NA | NA | NA | NA | NA |
| Gm21922 | 0 NA | NA | NA | NA | NA |
| Gm21923 | 0 NA | NA | NA | NA | NA |
| Gm21924 | 0 NA | NA | NA | NA | NA |
| Gm21930 | 0 NA | NA | NA | NA | NA |
| Gm21936 | 0 NA | NA | NA | NA | NA |
| Gm21937 | 0 NA | NA | NA | NA | NA |
| Gm21940 | 0 NA | NA | NA | NA | NA |
| Gm21941 | 0 NA | NA | NA | NA | NA |
| Gm21943 | 0 NA | NA | NA | NA | NA |
| Gm21953 | 0 NA | NA | NA | NA | NA |
| Gm21954 | 0 NA | NA | NA | NA | NA |
| Gm21956 | 0 NA | NA | NA | NA | NA |
| Gm21957 | 0 NA | NA | NA | NA | NA |
| Gm21958 | 0 NA | NA | NA | NA | NA |
| Gm21959 | 0 NA | NA | NA | NA | NA |
| Gm21963 | 0 NA | NA | NA | NA | NA |
| Gm21965 | 0 NA | NA | NA | NA | NA |
| Gm21974 | 0 NA | NA | NA | NA | NA |
| Gm21976 | 0 NA | NA | NA | NA | NA |
| Gm21977 | 0 NA | NA | NA | NA | NA |
| Gm21978 | 0 NA | NA | NA | NA | NA |
| Gm21979 | 0 NA | NA | NA | NA | NA |
| Gm21990 | 0 NA | NA | NA | NA | NA |
| Gm21991 | 0 NA | NA | NA | NA | NA |
| Gm21996 | 0 NA | NA | NA | NA | NA |

|         |      |    |    |    |    |
|---------|------|----|----|----|----|
| Gm21998 | 0 NA | NA | NA | NA | NA |
| Gm21999 | 0 NA | NA | NA | NA | NA |
| Gm2203  | 0 NA | NA | NA | NA | NA |
| Gm2213  | 0 NA | NA | NA | NA | NA |
| Gm2221  | 0 NA | NA | NA | NA | NA |
| Gm2223  | 0 NA | NA | NA | NA | NA |
| Gm2229  | 0 NA | NA | NA | NA | NA |
| Gm2231  | 0 NA | NA | NA | NA | NA |
| Gm2244  | 0 NA | NA | NA | NA | NA |
| Gm2267  | 0 NA | NA | NA | NA | NA |
| Gm2272  | 0 NA | NA | NA | NA | NA |
| Gm2287  | 0 NA | NA | NA | NA | NA |
| Gm2288  | 0 NA | NA | NA | NA | NA |
| Gm2310  | 0 NA | NA | NA | NA | NA |
| Gm2314  | 0 NA | NA | NA | NA | NA |
| Gm2316  | 0 NA | NA | NA | NA | NA |
| Gm2318  | 0 NA | NA | NA | NA | NA |
| Gm232   | 0 NA | NA | NA | NA | NA |
| Gm2324  | 0 NA | NA | NA | NA | NA |
| Gm2325  | 0 NA | NA | NA | NA | NA |
| Gm2328  | 0 NA | NA | NA | NA | NA |
| Gm2343  | 0 NA | NA | NA | NA | NA |
| Gm2345  | 0 NA | NA | NA | NA | NA |
| Gm2348  | 0 NA | NA | NA | NA | NA |
| Gm2361  | 0 NA | NA | NA | NA | NA |
| Gm2383  | 0 NA | NA | NA | NA | NA |
| Gm2389  | 0 NA | NA | NA | NA | NA |
| Gm2429  | 0 NA | NA | NA | NA | NA |
| Gm2431  | 0 NA | NA | NA | NA | NA |
| Gm2448  | 0 NA | NA | NA | NA | NA |
| Gm2467  | 0 NA | NA | NA | NA | NA |
| Gm2474  | 0 NA | NA | NA | NA | NA |
| Gm2492  | 0 NA | NA | NA | NA | NA |
| Gm2495  | 0 NA | NA | NA | NA | NA |
| Gm2497  | 0 NA | NA | NA | NA | NA |
| Gm2505  | 0 NA | NA | NA | NA | NA |
| Gm2517  | 0 NA | NA | NA | NA | NA |
| Gm2541  | 0 NA | NA | NA | NA | NA |
| Gm2544  | 0 NA | NA | NA | NA | NA |
| Gm2553  | 0 NA | NA | NA | NA | NA |
| Gm2559  | 0 NA | NA | NA | NA | NA |
| Gm2566  | 0 NA | NA | NA | NA | NA |
| Gm2607  | 0 NA | NA | NA | NA | NA |
| Gm2611  | 0 NA | NA | NA | NA | NA |
| Gm2614  | 0 NA | NA | NA | NA | NA |
| Gm2617  | 0 NA | NA | NA | NA | NA |
| Gm2622  | 0 NA | NA | NA | NA | NA |
| Gm2623  | 0 NA | NA | NA | NA | NA |
| Gm2638  | 0 NA | NA | NA | NA | NA |
| Gm2639  | 0 NA | NA | NA | NA | NA |
| Gm2645  | 0 NA | NA | NA | NA | NA |
| Gm2649  | 0 NA | NA | NA | NA | NA |
| Gm2651  | 0 NA | NA | NA | NA | NA |
| Gm26528 | 0 NA | NA | NA | NA | NA |
| Gm2654  | 0 NA | NA | NA | NA | NA |
| Gm26557 | 0 NA | NA | NA | NA | NA |
| Gm26570 | 0 NA | NA | NA | NA | NA |
| Gm26585 | 0 NA | NA | NA | NA | NA |
| Gm26587 | 0 NA | NA | NA | NA | NA |
| Gm26595 | 0 NA | NA | NA | NA | NA |
| Gm26607 | 0 NA | NA | NA | NA | NA |
| Gm26622 | 0 NA | NA | NA | NA | NA |
| Gm2663  | 0 NA | NA | NA | NA | NA |
| Gm26657 | 0 NA | NA | NA | NA | NA |
| Gm26661 | 0 NA | NA | NA | NA | NA |
| Gm26701 | 0 NA | NA | NA | NA | NA |

|         |      |    |    |    |    |
|---------|------|----|----|----|----|
| Gm26729 | 0 NA | NA | NA | NA | NA |
| Gm26731 | 0 NA | NA | NA | NA | NA |
| Gm26741 | 0 NA | NA | NA | NA | NA |
| Gm26746 | 0 NA | NA | NA | NA | NA |
| Gm2676  | 0 NA | NA | NA | NA | NA |
| Gm26817 | 0 NA | NA | NA | NA | NA |
| Gm26828 | 0 NA | NA | NA | NA | NA |
| Gm26864 | 0 NA | NA | NA | NA | NA |
| Gm26866 | 0 NA | NA | NA | NA | NA |
| Gm26875 | 0 NA | NA | NA | NA | NA |
| Gm26897 | 0 NA | NA | NA | NA | NA |
| Gm26898 | 0 NA | NA | NA | NA | NA |
| Gm2691  | 0 NA | NA | NA | NA | NA |
| Gm26913 | 0 NA | NA | NA | NA | NA |
| Gm26914 | 0 NA | NA | NA | NA | NA |
| Gm26915 | 0 NA | NA | NA | NA | NA |
| Gm26923 | 0 NA | NA | NA | NA | NA |
| Gm26925 | 0 NA | NA | NA | NA | NA |
| Gm26927 | 0 NA | NA | NA | NA | NA |
| Gm26928 | 0 NA | NA | NA | NA | NA |
| Gm26929 | 0 NA | NA | NA | NA | NA |
| Gm26931 | 0 NA | NA | NA | NA | NA |
| Gm26933 | 0 NA | NA | NA | NA | NA |
| Gm26937 | 0 NA | NA | NA | NA | NA |
| Gm26938 | 0 NA | NA | NA | NA | NA |
| Gm26942 | 0 NA | NA | NA | NA | NA |
| Gm26943 | 0 NA | NA | NA | NA | NA |
| Gm26950 | 0 NA | NA | NA | NA | NA |
| Gm26957 | 0 NA | NA | NA | NA | NA |
| Gm26960 | 0 NA | NA | NA | NA | NA |
| Gm26963 | 0 NA | NA | NA | NA | NA |
| Gm26970 | 0 NA | NA | NA | NA | NA |
| Gm26976 | 0 NA | NA | NA | NA | NA |
| Gm26977 | 0 NA | NA | NA | NA | NA |
| Gm26980 | 0 NA | NA | NA | NA | NA |
| Gm26988 | 0 NA | NA | NA | NA | NA |
| Gm26989 | 0 NA | NA | NA | NA | NA |
| Gm26991 | 0 NA | NA | NA | NA | NA |
| Gm26993 | 0 NA | NA | NA | NA | NA |
| Gm26996 | 0 NA | NA | NA | NA | NA |
| Gm270   | 0 NA | NA | NA | NA | NA |
| Gm27001 | 0 NA | NA | NA | NA | NA |
| Gm27005 | 0 NA | NA | NA | NA | NA |
| Gm27006 | 0 NA | NA | NA | NA | NA |
| Gm27013 | 0 NA | NA | NA | NA | NA |
| Gm27014 | 0 NA | NA | NA | NA | NA |
| Gm27018 | 0 NA | NA | NA | NA | NA |
| Gm27024 | 0 NA | NA | NA | NA | NA |
| Gm27025 | 0 NA | NA | NA | NA | NA |
| Gm27026 | 0 NA | NA | NA | NA | NA |
| Gm27034 | 0 NA | NA | NA | NA | NA |
| Gm27036 | 0 NA | NA | NA | NA | NA |
| Gm27037 | 0 NA | NA | NA | NA | NA |
| Gm27038 | 0 NA | NA | NA | NA | NA |
| Gm27039 | 0 NA | NA | NA | NA | NA |
| Gm27043 | 0 NA | NA | NA | NA | NA |
| Gm27044 | 0 NA | NA | NA | NA | NA |
| Gm27047 | 0 NA | NA | NA | NA | NA |
| Gm2707  | 0 NA | NA | NA | NA | NA |
| Gm2709  | 0 NA | NA | NA | NA | NA |
| Gm2710  | 0 NA | NA | NA | NA | NA |
| Gm27148 | 0 NA | NA | NA | NA | NA |
| Gm27150 | 0 NA | NA | NA | NA | NA |
| Gm27152 | 0 NA | NA | NA | NA | NA |
| Gm27155 | 0 NA | NA | NA | NA | NA |
| Gm27156 | 0 NA | NA | NA | NA | NA |

|         |      |    |    |    |    |
|---------|------|----|----|----|----|
| Gm27158 | 0 NA | NA | NA | NA | NA |
| Gm2716  | 0 NA | NA | NA | NA | NA |
| Gm27160 | 0 NA | NA | NA | NA | NA |
| Gm27161 | 0 NA | NA | NA | NA | NA |
| Gm27163 | 0 NA | NA | NA | NA | NA |
| Gm27165 | 0 NA | NA | NA | NA | NA |
| Gm27178 | 0 NA | NA | NA | NA | NA |
| Gm27179 | 0 NA | NA | NA | NA | NA |
| Gm27185 | 0 NA | NA | NA | NA | NA |
| Gm27189 | 0 NA | NA | NA | NA | NA |
| Gm2719  | 0 NA | NA | NA | NA | NA |
| Gm27190 | 0 NA | NA | NA | NA | NA |
| Gm272   | 0 NA | NA | NA | NA | NA |
| Gm27203 | 0 NA | NA | NA | NA | NA |
| Gm27210 | 0 NA | NA | NA | NA | NA |
| Gm27218 | 0 NA | NA | NA | NA | NA |
| Gm27220 | 0 NA | NA | NA | NA | NA |
| Gm27228 | 0 NA | NA | NA | NA | NA |
| Gm27233 | 0 NA | NA | NA | NA | NA |
| Gm27235 | 0 NA | NA | NA | NA | NA |
| Gm27236 | 0 NA | NA | NA | NA | NA |
| Gm27245 | 0 NA | NA | NA | NA | NA |
| Gm27248 | 0 NA | NA | NA | NA | NA |
| Gm27249 | 0 NA | NA | NA | NA | NA |
| Gm27254 | 0 NA | NA | NA | NA | NA |
| Gm2726  | 0 NA | NA | NA | NA | NA |
| Gm2734  | 0 NA | NA | NA | NA | NA |
| Gm2735  | 0 NA | NA | NA | NA | NA |
| Gm2736  | 0 NA | NA | NA | NA | NA |
| Gm2754  | 0 NA | NA | NA | NA | NA |
| Gm2756  | 0 NA | NA | NA | NA | NA |
| Gm2759  | 0 NA | NA | NA | NA | NA |
| Gm2768  | 0 NA | NA | NA | NA | NA |
| Gm2774  | 0 NA | NA | NA | NA | NA |
| Gm2791  | 0 NA | NA | NA | NA | NA |
| Gm2803  | 0 NA | NA | NA | NA | NA |
| Gm28038 | 0 NA | NA | NA | NA | NA |
| Gm28047 | 0 NA | NA | NA | NA | NA |
| Gm28051 | 0 NA | NA | NA | NA | NA |
| Gm28057 | 0 NA | NA | NA | NA | NA |
| Gm28058 | 0 NA | NA | NA | NA | NA |
| Gm28060 | 0 NA | NA | NA | NA | NA |
| Gm28061 | 0 NA | NA | NA | NA | NA |
| Gm28064 | 0 NA | NA | NA | NA | NA |
| Gm28066 | 0 NA | NA | NA | NA | NA |
| Gm28070 | 0 NA | NA | NA | NA | NA |
| Gm28071 | 0 NA | NA | NA | NA | NA |
| Gm28079 | 0 NA | NA | NA | NA | NA |
| Gm28080 | 0 NA | NA | NA | NA | NA |
| Gm28090 | 0 NA | NA | NA | NA | NA |
| Gm28093 | 0 NA | NA | NA | NA | NA |
| Gm28094 | 0 NA | NA | NA | NA | NA |
| Gm28097 | 0 NA | NA | NA | NA | NA |
| Gm28098 | 0 NA | NA | NA | NA | NA |
| Gm28099 | 0 NA | NA | NA | NA | NA |
| Gm281   | 0 NA | NA | NA | NA | NA |
| Gm28101 | 0 NA | NA | NA | NA | NA |
| Gm28102 | 0 NA | NA | NA | NA | NA |
| Gm28105 | 0 NA | NA | NA | NA | NA |
| Gm28106 | 0 NA | NA | NA | NA | NA |
| Gm28107 | 0 NA | NA | NA | NA | NA |
| Gm28110 | 0 NA | NA | NA | NA | NA |
| Gm28113 | 0 NA | NA | NA | NA | NA |
| Gm28114 | 0 NA | NA | NA | NA | NA |
| Gm28115 | 0 NA | NA | NA | NA | NA |
| Gm28116 | 0 NA | NA | NA | NA | NA |

|         |      |    |    |    |    |
|---------|------|----|----|----|----|
| Gm28118 | 0 NA | NA | NA | NA | NA |
| Gm28120 | 0 NA | NA | NA | NA | NA |
| Gm28121 | 0 NA | NA | NA | NA | NA |
| Gm28122 | 0 NA | NA | NA | NA | NA |
| Gm28123 | 0 NA | NA | NA | NA | NA |
| Gm28125 | 0 NA | NA | NA | NA | NA |
| Gm28141 | 0 NA | NA | NA | NA | NA |
| Gm28142 | 0 NA | NA | NA | NA | NA |
| Gm28143 | 0 NA | NA | NA | NA | NA |
| Gm28144 | 0 NA | NA | NA | NA | NA |
| Gm28145 | 0 NA | NA | NA | NA | NA |
| Gm28146 | 0 NA | NA | NA | NA | NA |
| Gm28148 | 0 NA | NA | NA | NA | NA |
| Gm28149 | 0 NA | NA | NA | NA | NA |
| Gm28150 | 0 NA | NA | NA | NA | NA |
| Gm28155 | 0 NA | NA | NA | NA | NA |
| Gm28158 | 0 NA | NA | NA | NA | NA |
| Gm28159 | 0 NA | NA | NA | NA | NA |
| Gm28160 | 0 NA | NA | NA | NA | NA |
| Gm28161 | 0 NA | NA | NA | NA | NA |
| Gm28162 | 0 NA | NA | NA | NA | NA |
| Gm28164 | 0 NA | NA | NA | NA | NA |
| Gm28165 | 0 NA | NA | NA | NA | NA |
| Gm28169 | 0 NA | NA | NA | NA | NA |
| Gm28171 | 0 NA | NA | NA | NA | NA |
| Gm28179 | 0 NA | NA | NA | NA | NA |
| Gm28184 | 0 NA | NA | NA | NA | NA |
| Gm28185 | 0 NA | NA | NA | NA | NA |
| Gm28186 | 0 NA | NA | NA | NA | NA |
| Gm28190 | 0 NA | NA | NA | NA | NA |
| Gm28191 | 0 NA | NA | NA | NA | NA |
| Gm28193 | 0 NA | NA | NA | NA | NA |
| Gm28200 | 0 NA | NA | NA | NA | NA |
| Gm28203 | 0 NA | NA | NA | NA | NA |
| Gm28204 | 0 NA | NA | NA | NA | NA |
| Gm28205 | 0 NA | NA | NA | NA | NA |
| Gm28211 | 0 NA | NA | NA | NA | NA |
| Gm28213 | 0 NA | NA | NA | NA | NA |
| Gm28219 | 0 NA | NA | NA | NA | NA |
| Gm28222 | 0 NA | NA | NA | NA | NA |
| Gm28223 | 0 NA | NA | NA | NA | NA |
| Gm28224 | 0 NA | NA | NA | NA | NA |
| Gm28227 | 0 NA | NA | NA | NA | NA |
| Gm28230 | 0 NA | NA | NA | NA | NA |
| Gm28232 | 0 NA | NA | NA | NA | NA |
| Gm28234 | 0 NA | NA | NA | NA | NA |
| Gm28239 | 0 NA | NA | NA | NA | NA |
| Gm28241 | 0 NA | NA | NA | NA | NA |
| Gm28243 | 0 NA | NA | NA | NA | NA |
| Gm28247 | 0 NA | NA | NA | NA | NA |
| Gm28248 | 0 NA | NA | NA | NA | NA |
| Gm28251 | 0 NA | NA | NA | NA | NA |
| Gm28253 | 0 NA | NA | NA | NA | NA |
| Gm28255 | 0 NA | NA | NA | NA | NA |
| Gm28256 | 0 NA | NA | NA | NA | NA |
| Gm28257 | 0 NA | NA | NA | NA | NA |
| Gm28261 | 0 NA | NA | NA | NA | NA |
| Gm28263 | 0 NA | NA | NA | NA | NA |
| Gm28266 | 0 NA | NA | NA | NA | NA |
| Gm28267 | 0 NA | NA | NA | NA | NA |
| Gm28269 | 0 NA | NA | NA | NA | NA |
| Gm28270 | 0 NA | NA | NA | NA | NA |
| Gm28272 | 0 NA | NA | NA | NA | NA |
| Gm28273 | 0 NA | NA | NA | NA | NA |
| Gm28275 | 0 NA | NA | NA | NA | NA |
| Gm28281 | 0 NA | NA | NA | NA | NA |



|         |      |    |    |    |    |
|---------|------|----|----|----|----|
| Gm28282 | 0 NA | NA | NA | NA | NA |
| Gm28283 | 0 NA | NA | NA | NA | NA |
| Gm28288 | 0 NA | NA | NA | NA | NA |
| Gm28290 | 0 NA | NA | NA | NA | NA |
| Gm28292 | 0 NA | NA | NA | NA | NA |
| Gm28299 | 0 NA | NA | NA | NA | NA |
| Gm28302 | 0 NA | NA | NA | NA | NA |
| Gm28303 | 0 NA | NA | NA | NA | NA |
| Gm28304 | 0 NA | NA | NA | NA | NA |
| Gm28305 | 0 NA | NA | NA | NA | NA |
| Gm28308 | 0 NA | NA | NA | NA | NA |
| Gm28314 | 0 NA | NA | NA | NA | NA |
| Gm28327 | 0 NA | NA | NA | NA | NA |
| Gm28328 | 0 NA | NA | NA | NA | NA |
| Gm28329 | 0 NA | NA | NA | NA | NA |
| Gm28334 | 0 NA | NA | NA | NA | NA |
| Gm28335 | 0 NA | NA | NA | NA | NA |
| Gm28337 | 0 NA | NA | NA | NA | NA |
| Gm28339 | 0 NA | NA | NA | NA | NA |
| Gm28341 | 0 NA | NA | NA | NA | NA |
| Gm28343 | 0 NA | NA | NA | NA | NA |
| Gm28349 | 0 NA | NA | NA | NA | NA |
| Gm28350 | 0 NA | NA | NA | NA | NA |
| Gm28353 | 0 NA | NA | NA | NA | NA |
| Gm28354 | 0 NA | NA | NA | NA | NA |
| Gm28358 | 0 NA | NA | NA | NA | NA |
| Gm28359 | 0 NA | NA | NA | NA | NA |
| Gm28360 | 0 NA | NA | NA | NA | NA |
| Gm28361 | 0 NA | NA | NA | NA | NA |
| Gm28363 | 0 NA | NA | NA | NA | NA |
| Gm28366 | 0 NA | NA | NA | NA | NA |
| Gm28368 | 0 NA | NA | NA | NA | NA |
| Gm28369 | 0 NA | NA | NA | NA | NA |
| Gm28371 | 0 NA | NA | NA | NA | NA |
| Gm28372 | 0 NA | NA | NA | NA | NA |
| Gm28377 | 0 NA | NA | NA | NA | NA |
| Gm28381 | 0 NA | NA | NA | NA | NA |
| Gm28383 | 0 NA | NA | NA | NA | NA |
| Gm28384 | 0 NA | NA | NA | NA | NA |
| Gm28385 | 0 NA | NA | NA | NA | NA |
| Gm28388 | 0 NA | NA | NA | NA | NA |
| Gm28389 | 0 NA | NA | NA | NA | NA |
| Gm28390 | 0 NA | NA | NA | NA | NA |
| Gm28391 | 0 NA | NA | NA | NA | NA |
| Gm28392 | 0 NA | NA | NA | NA | NA |
| Gm28396 | 0 NA | NA | NA | NA | NA |
| Gm28397 | 0 NA | NA | NA | NA | NA |
| Gm28399 | 0 NA | NA | NA | NA | NA |
| Gm2840  | 0 NA | NA | NA | NA | NA |
| Gm28400 | 0 NA | NA | NA | NA | NA |
| Gm28408 | 0 NA | NA | NA | NA | NA |
| Gm28409 | 0 NA | NA | NA | NA | NA |
| Gm28412 | 0 NA | NA | NA | NA | NA |
| Gm28413 | 0 NA | NA | NA | NA | NA |
| Gm28414 | 0 NA | NA | NA | NA | NA |
| Gm28416 | 0 NA | NA | NA | NA | NA |
| Gm28418 | 0 NA | NA | NA | NA | NA |
| Gm28419 | 0 NA | NA | NA | NA | NA |
| Gm28420 | 0 NA | NA | NA | NA | NA |
| Gm28423 | 0 NA | NA | NA | NA | NA |
| Gm28428 | 0 NA | NA | NA | NA | NA |
| Gm28429 | 0 NA | NA | NA | NA | NA |
| Gm28433 | 0 NA | NA | NA | NA | NA |
| Gm28434 | 0 NA | NA | NA | NA | NA |
| Gm28435 | 0 NA | NA | NA | NA | NA |
| Gm28436 | 0 NA | NA | NA | NA | NA |

|         |      |    |    |    |    |
|---------|------|----|----|----|----|
| Gm28439 | 0 NA | NA | NA | NA | NA |
| Gm28443 | 0 NA | NA | NA | NA | NA |
| Gm28446 | 0 NA | NA | NA | NA | NA |
| Gm28451 | 0 NA | NA | NA | NA | NA |
| Gm28452 | 0 NA | NA | NA | NA | NA |
| Gm28459 | 0 NA | NA | NA | NA | NA |
| Gm28466 | 0 NA | NA | NA | NA | NA |
| Gm28467 | 0 NA | NA | NA | NA | NA |
| Gm28468 | 0 NA | NA | NA | NA | NA |
| Gm28471 | 0 NA | NA | NA | NA | NA |
| Gm28473 | 0 NA | NA | NA | NA | NA |
| Gm28474 | 0 NA | NA | NA | NA | NA |
| Gm28476 | 0 NA | NA | NA | NA | NA |
| Gm28477 | 0 NA | NA | NA | NA | NA |
| Gm28478 | 0 NA | NA | NA | NA | NA |
| Gm28480 | 0 NA | NA | NA | NA | NA |
| Gm28481 | 0 NA | NA | NA | NA | NA |
| Gm28483 | 0 NA | NA | NA | NA | NA |
| Gm28484 | 0 NA | NA | NA | NA | NA |
| Gm28489 | 0 NA | NA | NA | NA | NA |
| Gm28490 | 0 NA | NA | NA | NA | NA |
| Gm28495 | 0 NA | NA | NA | NA | NA |
| Gm28500 | 0 NA | NA | NA | NA | NA |
| Gm28504 | 0 NA | NA | NA | NA | NA |
| Gm28506 | 0 NA | NA | NA | NA | NA |
| Gm28507 | 0 NA | NA | NA | NA | NA |
| Gm28508 | 0 NA | NA | NA | NA | NA |
| Gm28527 | 0 NA | NA | NA | NA | NA |
| Gm28531 | 0 NA | NA | NA | NA | NA |
| Gm28534 | 0 NA | NA | NA | NA | NA |
| Gm28537 | 0 NA | NA | NA | NA | NA |
| Gm28539 | 0 NA | NA | NA | NA | NA |
| Gm2854  | 0 NA | NA | NA | NA | NA |
| Gm28542 | 0 NA | NA | NA | NA | NA |
| Gm28546 | 0 NA | NA | NA | NA | NA |
| Gm2855  | 0 NA | NA | NA | NA | NA |
| Gm28553 | 0 NA | NA | NA | NA | NA |
| Gm28558 | 0 NA | NA | NA | NA | NA |
| Gm28559 | 0 NA | NA | NA | NA | NA |
| Gm28560 | 0 NA | NA | NA | NA | NA |
| Gm28567 | 0 NA | NA | NA | NA | NA |
| Gm28569 | 0 NA | NA | NA | NA | NA |
| Gm28572 | 0 NA | NA | NA | NA | NA |
| Gm28573 | 0 NA | NA | NA | NA | NA |
| Gm28574 | 0 NA | NA | NA | NA | NA |
| Gm28576 | 0 NA | NA | NA | NA | NA |
| Gm28580 | 0 NA | NA | NA | NA | NA |
| Gm28581 | 0 NA | NA | NA | NA | NA |
| Gm28583 | 0 NA | NA | NA | NA | NA |
| Gm28584 | 0 NA | NA | NA | NA | NA |
| Gm28589 | 0 NA | NA | NA | NA | NA |
| Gm28591 | 0 NA | NA | NA | NA | NA |
| Gm28596 | 0 NA | NA | NA | NA | NA |
| Gm28597 | 0 NA | NA | NA | NA | NA |
| Gm28598 | 0 NA | NA | NA | NA | NA |
| Gm28599 | 0 NA | NA | NA | NA | NA |
| Gm2860  | 0 NA | NA | NA | NA | NA |
| Gm28603 | 0 NA | NA | NA | NA | NA |
| Gm28607 | 0 NA | NA | NA | NA | NA |
| Gm28608 | 0 NA | NA | NA | NA | NA |
| Gm28611 | 0 NA | NA | NA | NA | NA |
| Gm28614 | 0 NA | NA | NA | NA | NA |
| Gm28615 | 0 NA | NA | NA | NA | NA |
| Gm28618 | 0 NA | NA | NA | NA | NA |
| Gm28623 | 0 NA | NA | NA | NA | NA |
| Gm28624 | 0 NA | NA | NA | NA | NA |

|         |      |    |    |    |    |
|---------|------|----|----|----|----|
| Gm28627 | 0 NA | NA | NA | NA | NA |
| Gm28628 | 0 NA | NA | NA | NA | NA |
| Gm28629 | 0 NA | NA | NA | NA | NA |
| Gm28630 | 0 NA | NA | NA | NA | NA |
| Gm28631 | 0 NA | NA | NA | NA | NA |
| Gm28635 | 0 NA | NA | NA | NA | NA |
| Gm28636 | 0 NA | NA | NA | NA | NA |
| Gm28645 | 0 NA | NA | NA | NA | NA |
| Gm28646 | 0 NA | NA | NA | NA | NA |
| Gm28647 | 0 NA | NA | NA | NA | NA |
| Gm28648 | 0 NA | NA | NA | NA | NA |
| Gm28649 | 0 NA | NA | NA | NA | NA |
| Gm28650 | 0 NA | NA | NA | NA | NA |
| Gm28654 | 0 NA | NA | NA | NA | NA |
| Gm28655 | 0 NA | NA | NA | NA | NA |
| Gm28657 | 0 NA | NA | NA | NA | NA |
| Gm28658 | 0 NA | NA | NA | NA | NA |
| Gm2866  | 0 NA | NA | NA | NA | NA |
| Gm28660 | 0 NA | NA | NA | NA | NA |
| Gm28662 | 0 NA | NA | NA | NA | NA |
| Gm28665 | 0 NA | NA | NA | NA | NA |
| Gm28666 | 0 NA | NA | NA | NA | NA |
| Gm28667 | 0 NA | NA | NA | NA | NA |
| Gm28671 | 0 NA | NA | NA | NA | NA |
| Gm28677 | 0 NA | NA | NA | NA | NA |
| Gm28678 | 0 NA | NA | NA | NA | NA |
| Gm28680 | 0 NA | NA | NA | NA | NA |
| Gm28682 | 0 NA | NA | NA | NA | NA |
| Gm28683 | 0 NA | NA | NA | NA | NA |
| Gm28685 | 0 NA | NA | NA | NA | NA |
| Gm28686 | 0 NA | NA | NA | NA | NA |
| Gm28688 | 0 NA | NA | NA | NA | NA |
| Gm2869  | 0 NA | NA | NA | NA | NA |
| Gm28695 | 0 NA | NA | NA | NA | NA |
| Gm28698 | 0 NA | NA | NA | NA | NA |
| Gm28699 | 0 NA | NA | NA | NA | NA |
| Gm28705 | 0 NA | NA | NA | NA | NA |
| Gm2871  | 0 NA | NA | NA | NA | NA |
| Gm28716 | 0 NA | NA | NA | NA | NA |
| Gm28717 | 0 NA | NA | NA | NA | NA |
| Gm28724 | 0 NA | NA | NA | NA | NA |
| Gm28728 | 0 NA | NA | NA | NA | NA |
| Gm28734 | 0 NA | NA | NA | NA | NA |
| Gm28736 | 0 NA | NA | NA | NA | NA |
| Gm28737 | 0 NA | NA | NA | NA | NA |
| Gm28738 | 0 NA | NA | NA | NA | NA |
| Gm28739 | 0 NA | NA | NA | NA | NA |
| Gm28740 | 0 NA | NA | NA | NA | NA |
| Gm28742 | 0 NA | NA | NA | NA | NA |
| Gm28749 | 0 NA | NA | NA | NA | NA |
| Gm2875  | 0 NA | NA | NA | NA | NA |
| Gm28751 | 0 NA | NA | NA | NA | NA |
| Gm28752 | 0 NA | NA | NA | NA | NA |
| Gm28755 | 0 NA | NA | NA | NA | NA |
| Gm28757 | 0 NA | NA | NA | NA | NA |
| Gm28759 | 0 NA | NA | NA | NA | NA |
| Gm28766 | 0 NA | NA | NA | NA | NA |
| Gm28767 | 0 NA | NA | NA | NA | NA |
| Gm28768 | 0 NA | NA | NA | NA | NA |
| Gm28769 | 0 NA | NA | NA | NA | NA |
| Gm2877  | 0 NA | NA | NA | NA | NA |
| Gm28770 | 0 NA | NA | NA | NA | NA |
| Gm28773 | 0 NA | NA | NA | NA | NA |
| Gm28776 | 0 NA | NA | NA | NA | NA |
| Gm28778 | 0 NA | NA | NA | NA | NA |
| Gm28779 | 0 NA | NA | NA | NA | NA |

|         |      |    |    |    |    |
|---------|------|----|----|----|----|
| Gm2878  | 0 NA | NA | NA | NA | NA |
| Gm28780 | 0 NA | NA | NA | NA | NA |
| Gm28781 | 0 NA | NA | NA | NA | NA |
| Gm28785 | 0 NA | NA | NA | NA | NA |
| Gm28787 | 0 NA | NA | NA | NA | NA |
| Gm28788 | 0 NA | NA | NA | NA | NA |
| Gm28790 | 0 NA | NA | NA | NA | NA |
| Gm28794 | 0 NA | NA | NA | NA | NA |
| Gm28795 | 0 NA | NA | NA | NA | NA |
| Gm28796 | 0 NA | NA | NA | NA | NA |
| Gm28797 | 0 NA | NA | NA | NA | NA |
| Gm28801 | 0 NA | NA | NA | NA | NA |
| Gm28802 | 0 NA | NA | NA | NA | NA |
| Gm28803 | 0 NA | NA | NA | NA | NA |
| Gm28808 | 0 NA | NA | NA | NA | NA |
| Gm28812 | 0 NA | NA | NA | NA | NA |
| Gm28814 | 0 NA | NA | NA | NA | NA |
| Gm28815 | 0 NA | NA | NA | NA | NA |
| Gm28825 | 0 NA | NA | NA | NA | NA |
| Gm28827 | 0 NA | NA | NA | NA | NA |
| Gm28828 | 0 NA | NA | NA | NA | NA |
| Gm28829 | 0 NA | NA | NA | NA | NA |
| Gm28830 | 0 NA | NA | NA | NA | NA |
| Gm28831 | 0 NA | NA | NA | NA | NA |
| Gm28833 | 0 NA | NA | NA | NA | NA |
| Gm28835 | 0 NA | NA | NA | NA | NA |
| Gm28837 | 0 NA | NA | NA | NA | NA |
| Gm28838 | 0 NA | NA | NA | NA | NA |
| Gm28840 | 0 NA | NA | NA | NA | NA |
| Gm28841 | 0 NA | NA | NA | NA | NA |
| Gm28843 | 0 NA | NA | NA | NA | NA |
| Gm28844 | 0 NA | NA | NA | NA | NA |
| Gm28845 | 0 NA | NA | NA | NA | NA |
| Gm28846 | 0 NA | NA | NA | NA | NA |
| Gm28847 | 0 NA | NA | NA | NA | NA |
| Gm28848 | 0 NA | NA | NA | NA | NA |
| Gm28849 | 0 NA | NA | NA | NA | NA |
| Gm28854 | 0 NA | NA | NA | NA | NA |
| Gm28855 | 0 NA | NA | NA | NA | NA |
| Gm28859 | 0 NA | NA | NA | NA | NA |
| Gm28860 | 0 NA | NA | NA | NA | NA |
| Gm28861 | 0 NA | NA | NA | NA | NA |
| Gm28862 | 0 NA | NA | NA | NA | NA |
| Gm28870 | 0 NA | NA | NA | NA | NA |
| Gm28871 | 0 NA | NA | NA | NA | NA |
| Gm28877 | 0 NA | NA | NA | NA | NA |
| Gm28879 | 0 NA | NA | NA | NA | NA |
| Gm2888  | 0 NA | NA | NA | NA | NA |
| Gm28882 | 0 NA | NA | NA | NA | NA |
| Gm28883 | 0 NA | NA | NA | NA | NA |
| Gm28885 | 0 NA | NA | NA | NA | NA |
| Gm28891 | 0 NA | NA | NA | NA | NA |
| Gm28894 | 0 NA | NA | NA | NA | NA |
| Gm28895 | 0 NA | NA | NA | NA | NA |
| Gm28896 | 0 NA | NA | NA | NA | NA |
| Gm28897 | 0 NA | NA | NA | NA | NA |
| Gm28899 | 0 NA | NA | NA | NA | NA |
| Gm28907 | 0 NA | NA | NA | NA | NA |
| Gm28909 | 0 NA | NA | NA | NA | NA |
| Gm28910 | 0 NA | NA | NA | NA | NA |
| Gm28911 | 0 NA | NA | NA | NA | NA |
| Gm28915 | 0 NA | NA | NA | NA | NA |
| Gm28916 | 0 NA | NA | NA | NA | NA |
| Gm28917 | 0 NA | NA | NA | NA | NA |
| Gm2892  | 0 NA | NA | NA | NA | NA |
| Gm28920 | 0 NA | NA | NA | NA | NA |

|         |      |    |    |    |    |
|---------|------|----|----|----|----|
| Gm28921 | 0 NA | NA | NA | NA | NA |
| Gm28922 | 0 NA | NA | NA | NA | NA |
| Gm28923 | 0 NA | NA | NA | NA | NA |
| Gm28924 | 0 NA | NA | NA | NA | NA |
| Gm28926 | 0 NA | NA | NA | NA | NA |
| Gm28927 | 0 NA | NA | NA | NA | NA |
| Gm28934 | 0 NA | NA | NA | NA | NA |
| Gm28936 | 0 NA | NA | NA | NA | NA |
| Gm28937 | 0 NA | NA | NA | NA | NA |
| Gm28939 | 0 NA | NA | NA | NA | NA |
| Gm28943 | 0 NA | NA | NA | NA | NA |
| Gm28946 | 0 NA | NA | NA | NA | NA |
| Gm28949 | 0 NA | NA | NA | NA | NA |
| Gm28951 | 0 NA | NA | NA | NA | NA |
| Gm28952 | 0 NA | NA | NA | NA | NA |
| Gm28953 | 0 NA | NA | NA | NA | NA |
| Gm28957 | 0 NA | NA | NA | NA | NA |
| Gm28958 | 0 NA | NA | NA | NA | NA |
| Gm28961 | 0 NA | NA | NA | NA | NA |
| Gm28968 | 0 NA | NA | NA | NA | NA |
| Gm28969 | 0 NA | NA | NA | NA | NA |
| Gm28973 | 0 NA | NA | NA | NA | NA |
| Gm28974 | 0 NA | NA | NA | NA | NA |
| Gm28975 | 0 NA | NA | NA | NA | NA |
| Gm28976 | 0 NA | NA | NA | NA | NA |
| Gm28978 | 0 NA | NA | NA | NA | NA |
| Gm28980 | 0 NA | NA | NA | NA | NA |
| Gm28983 | 0 NA | NA | NA | NA | NA |
| Gm28990 | 0 NA | NA | NA | NA | NA |
| Gm28992 | 0 NA | NA | NA | NA | NA |
| Gm28995 | 0 NA | NA | NA | NA | NA |
| Gm28996 | 0 NA | NA | NA | NA | NA |
| Gm28997 | 0 NA | NA | NA | NA | NA |
| Gm28998 | 0 NA | NA | NA | NA | NA |
| Gm29000 | 0 NA | NA | NA | NA | NA |
| Gm29001 | 0 NA | NA | NA | NA | NA |
| Gm29002 | 0 NA | NA | NA | NA | NA |
| Gm29014 | 0 NA | NA | NA | NA | NA |
| Gm29022 | 0 NA | NA | NA | NA | NA |
| Gm29024 | 0 NA | NA | NA | NA | NA |
| Gm29026 | 0 NA | NA | NA | NA | NA |
| Gm29029 | 0 NA | NA | NA | NA | NA |
| Gm29030 | 0 NA | NA | NA | NA | NA |
| Gm29031 | 0 NA | NA | NA | NA | NA |
| Gm29032 | 0 NA | NA | NA | NA | NA |
| Gm29033 | 0 NA | NA | NA | NA | NA |
| Gm29034 | 0 NA | NA | NA | NA | NA |
| Gm29037 | 0 NA | NA | NA | NA | NA |
| Gm29038 | 0 NA | NA | NA | NA | NA |
| Gm29041 | 0 NA | NA | NA | NA | NA |
| Gm29045 | 0 NA | NA | NA | NA | NA |
| Gm29047 | 0 NA | NA | NA | NA | NA |
| Gm29048 | 0 NA | NA | NA | NA | NA |
| Gm29049 | 0 NA | NA | NA | NA | NA |
| Gm29057 | 0 NA | NA | NA | NA | NA |
| Gm29058 | 0 NA | NA | NA | NA | NA |
| Gm29059 | 0 NA | NA | NA | NA | NA |
| Gm29062 | 0 NA | NA | NA | NA | NA |
| Gm29068 | 0 NA | NA | NA | NA | NA |
| Gm2907  | 0 NA | NA | NA | NA | NA |
| Gm29072 | 0 NA | NA | NA | NA | NA |
| Gm29073 | 0 NA | NA | NA | NA | NA |
| Gm29075 | 0 NA | NA | NA | NA | NA |
| Gm29076 | 0 NA | NA | NA | NA | NA |
| Gm29079 | 0 NA | NA | NA | NA | NA |
| Gm29085 | 0 NA | NA | NA | NA | NA |

|         |      |    |    |    |    |
|---------|------|----|----|----|----|
| Gm29086 | 0 NA | NA | NA | NA | NA |
| Gm29092 | 0 NA | NA | NA | NA | NA |
| Gm29094 | 0 NA | NA | NA | NA | NA |
| Gm29097 | 0 NA | NA | NA | NA | NA |
| Gm29104 | 0 NA | NA | NA | NA | NA |
| Gm29105 | 0 NA | NA | NA | NA | NA |
| Gm29106 | 0 NA | NA | NA | NA | NA |
| Gm29109 | 0 NA | NA | NA | NA | NA |
| Gm29110 | 0 NA | NA | NA | NA | NA |
| Gm29111 | 0 NA | NA | NA | NA | NA |
| Gm29115 | 0 NA | NA | NA | NA | NA |
| Gm29118 | 0 NA | NA | NA | NA | NA |
| Gm29119 | 0 NA | NA | NA | NA | NA |
| Gm29120 | 0 NA | NA | NA | NA | NA |
| Gm29121 | 0 NA | NA | NA | NA | NA |
| Gm29124 | 0 NA | NA | NA | NA | NA |
| Gm29133 | 0 NA | NA | NA | NA | NA |
| Gm29138 | 0 NA | NA | NA | NA | NA |
| Gm2914  | 0 NA | NA | NA | NA | NA |
| Gm29140 | 0 NA | NA | NA | NA | NA |
| Gm29141 | 0 NA | NA | NA | NA | NA |
| Gm29142 | 0 NA | NA | NA | NA | NA |
| Gm29143 | 0 NA | NA | NA | NA | NA |
| Gm29144 | 0 NA | NA | NA | NA | NA |
| Gm29145 | 0 NA | NA | NA | NA | NA |
| Gm29147 | 0 NA | NA | NA | NA | NA |
| Gm29148 | 0 NA | NA | NA | NA | NA |
| Gm29149 | 0 NA | NA | NA | NA | NA |
| Gm2915  | 0 NA | NA | NA | NA | NA |
| Gm29159 | 0 NA | NA | NA | NA | NA |
| Gm29160 | 0 NA | NA | NA | NA | NA |
| Gm29161 | 0 NA | NA | NA | NA | NA |
| Gm29165 | 0 NA | NA | NA | NA | NA |
| Gm29167 | 0 NA | NA | NA | NA | NA |
| Gm29169 | 0 NA | NA | NA | NA | NA |
| Gm29171 | 0 NA | NA | NA | NA | NA |
| Gm29178 | 0 NA | NA | NA | NA | NA |
| Gm29179 | 0 NA | NA | NA | NA | NA |
| Gm29180 | 0 NA | NA | NA | NA | NA |
| Gm29181 | 0 NA | NA | NA | NA | NA |
| Gm29184 | 0 NA | NA | NA | NA | NA |
| Gm29189 | 0 NA | NA | NA | NA | NA |
| Gm29192 | 0 NA | NA | NA | NA | NA |
| Gm29195 | 0 NA | NA | NA | NA | NA |
| Gm29196 | 0 NA | NA | NA | NA | NA |
| Gm29197 | 0 NA | NA | NA | NA | NA |
| Gm29199 | 0 NA | NA | NA | NA | NA |
| Gm29211 | 0 NA | NA | NA | NA | NA |
| Gm29212 | 0 NA | NA | NA | NA | NA |
| Gm29218 | 0 NA | NA | NA | NA | NA |
| Gm29223 | 0 NA | NA | NA | NA | NA |
| Gm29224 | 0 NA | NA | NA | NA | NA |
| Gm29227 | 0 NA | NA | NA | NA | NA |
| Gm29231 | 0 NA | NA | NA | NA | NA |
| Gm29238 | 0 NA | NA | NA | NA | NA |
| Gm29239 | 0 NA | NA | NA | NA | NA |
| Gm29244 | 0 NA | NA | NA | NA | NA |
| Gm29249 | 0 NA | NA | NA | NA | NA |
| Gm29251 | 0 NA | NA | NA | NA | NA |
| Gm29256 | 0 NA | NA | NA | NA | NA |
| Gm29258 | 0 NA | NA | NA | NA | NA |
| Gm29259 | 0 NA | NA | NA | NA | NA |
| Gm2926  | 0 NA | NA | NA | NA | NA |
| Gm29262 | 0 NA | NA | NA | NA | NA |
| Gm29263 | 0 NA | NA | NA | NA | NA |
| Gm29267 | 0 NA | NA | NA | NA | NA |

|         |      |    |    |    |    |
|---------|------|----|----|----|----|
| Gm29268 | 0 NA | NA | NA | NA | NA |
| Gm29269 | 0 NA | NA | NA | NA | NA |
| Gm29272 | 0 NA | NA | NA | NA | NA |
| Gm29273 | 0 NA | NA | NA | NA | NA |
| Gm29276 | 0 NA | NA | NA | NA | NA |
| Gm29279 | 0 NA | NA | NA | NA | NA |
| Gm29280 | 0 NA | NA | NA | NA | NA |
| Gm29281 | 0 NA | NA | NA | NA | NA |
| Gm29289 | 0 NA | NA | NA | NA | NA |
| Gm29293 | 0 NA | NA | NA | NA | NA |
| Gm29298 | 0 NA | NA | NA | NA | NA |
| Gm29299 | 0 NA | NA | NA | NA | NA |
| Gm2930  | 0 NA | NA | NA | NA | NA |
| Gm29300 | 0 NA | NA | NA | NA | NA |
| Gm29304 | 0 NA | NA | NA | NA | NA |
| Gm29306 | 0 NA | NA | NA | NA | NA |
| Gm29307 | 0 NA | NA | NA | NA | NA |
| Gm29308 | 0 NA | NA | NA | NA | NA |
| Gm29310 | 0 NA | NA | NA | NA | NA |
| Gm29312 | 0 NA | NA | NA | NA | NA |
| Gm29314 | 0 NA | NA | NA | NA | NA |
| Gm29317 | 0 NA | NA | NA | NA | NA |
| Gm29319 | 0 NA | NA | NA | NA | NA |
| Gm29320 | 0 NA | NA | NA | NA | NA |
| Gm29330 | 0 NA | NA | NA | NA | NA |
| Gm29332 | 0 NA | NA | NA | NA | NA |
| Gm29333 | 0 NA | NA | NA | NA | NA |
| Gm29334 | 0 NA | NA | NA | NA | NA |
| Gm29335 | 0 NA | NA | NA | NA | NA |
| Gm29339 | 0 NA | NA | NA | NA | NA |
| Gm29344 | 0 NA | NA | NA | NA | NA |
| Gm29350 | 0 NA | NA | NA | NA | NA |
| Gm29352 | 0 NA | NA | NA | NA | NA |
| Gm29354 | 0 NA | NA | NA | NA | NA |
| Gm29355 | 0 NA | NA | NA | NA | NA |
| Gm29356 | 0 NA | NA | NA | NA | NA |
| Gm29357 | 0 NA | NA | NA | NA | NA |
| Gm29365 | 0 NA | NA | NA | NA | NA |
| Gm29366 | 0 NA | NA | NA | NA | NA |
| Gm29369 | 0 NA | NA | NA | NA | NA |
| Gm29372 | 0 NA | NA | NA | NA | NA |
| Gm29377 | 0 NA | NA | NA | NA | NA |
| Gm29378 | 0 NA | NA | NA | NA | NA |
| Gm29382 | 0 NA | NA | NA | NA | NA |
| Gm29383 | 0 NA | NA | NA | NA | NA |
| Gm29385 | 0 NA | NA | NA | NA | NA |
| Gm29389 | 0 NA | NA | NA | NA | NA |
| Gm2939  | 0 NA | NA | NA | NA | NA |
| Gm29390 | 0 NA | NA | NA | NA | NA |
| Gm29391 | 0 NA | NA | NA | NA | NA |
| Gm29396 | 0 NA | NA | NA | NA | NA |
| Gm29400 | 0 NA | NA | NA | NA | NA |
| Gm29401 | 0 NA | NA | NA | NA | NA |
| Gm29402 | 0 NA | NA | NA | NA | NA |
| Gm29403 | 0 NA | NA | NA | NA | NA |
| Gm29407 | 0 NA | NA | NA | NA | NA |
| Gm29410 | 0 NA | NA | NA | NA | NA |
| Gm29411 | 0 NA | NA | NA | NA | NA |
| Gm29412 | 0 NA | NA | NA | NA | NA |
| Gm29413 | 0 NA | NA | NA | NA | NA |
| Gm29420 | 0 NA | NA | NA | NA | NA |
| Gm29422 | 0 NA | NA | NA | NA | NA |
| Gm29424 | 0 NA | NA | NA | NA | NA |
| Gm29428 | 0 NA | NA | NA | NA | NA |
| Gm29429 | 0 NA | NA | NA | NA | NA |
| Gm29432 | 0 NA | NA | NA | NA | NA |

|         |      |    |    |    |    |
|---------|------|----|----|----|----|
| Gm29435 | 0 NA | NA | NA | NA | NA |
| Gm29437 | 0 NA | NA | NA | NA | NA |
| Gm29441 | 0 NA | NA | NA | NA | NA |
| Gm29448 | 0 NA | NA | NA | NA | NA |
| Gm29451 | 0 NA | NA | NA | NA | NA |
| Gm29452 | 0 NA | NA | NA | NA | NA |
| Gm29454 | 0 NA | NA | NA | NA | NA |
| Gm29460 | 0 NA | NA | NA | NA | NA |
| Gm29462 | 0 NA | NA | NA | NA | NA |
| Gm29468 | 0 NA | NA | NA | NA | NA |
| Gm29469 | 0 NA | NA | NA | NA | NA |
| Gm29470 | 0 NA | NA | NA | NA | NA |
| Gm29471 | 0 NA | NA | NA | NA | NA |
| Gm29474 | 0 NA | NA | NA | NA | NA |
| Gm29476 | 0 NA | NA | NA | NA | NA |
| Gm29479 | 0 NA | NA | NA | NA | NA |
| Gm29484 | 0 NA | NA | NA | NA | NA |
| Gm29485 | 0 NA | NA | NA | NA | NA |
| Gm29486 | 0 NA | NA | NA | NA | NA |
| Gm29489 | 0 NA | NA | NA | NA | NA |
| Gm29490 | 0 NA | NA | NA | NA | NA |
| Gm29492 | 0 NA | NA | NA | NA | NA |
| Gm29495 | 0 NA | NA | NA | NA | NA |
| Gm29496 | 0 NA | NA | NA | NA | NA |
| Gm29499 | 0 NA | NA | NA | NA | NA |
| Gm2950  | 0 NA | NA | NA | NA | NA |
| Gm29503 | 0 NA | NA | NA | NA | NA |
| Gm29505 | 0 NA | NA | NA | NA | NA |
| Gm2951  | 0 NA | NA | NA | NA | NA |
| Gm29512 | 0 NA | NA | NA | NA | NA |
| Gm29517 | 0 NA | NA | NA | NA | NA |
| Gm29518 | 0 NA | NA | NA | NA | NA |
| Gm29519 | 0 NA | NA | NA | NA | NA |
| Gm29523 | 0 NA | NA | NA | NA | NA |
| Gm29524 | 0 NA | NA | NA | NA | NA |
| Gm29525 | 0 NA | NA | NA | NA | NA |
| Gm29526 | 0 NA | NA | NA | NA | NA |
| Gm29528 | 0 NA | NA | NA | NA | NA |
| Gm29533 | 0 NA | NA | NA | NA | NA |
| Gm29534 | 0 NA | NA | NA | NA | NA |
| Gm29535 | 0 NA | NA | NA | NA | NA |
| Gm29544 | 0 NA | NA | NA | NA | NA |
| Gm29545 | 0 NA | NA | NA | NA | NA |
| Gm29546 | 0 NA | NA | NA | NA | NA |
| Gm29548 | 0 NA | NA | NA | NA | NA |
| Gm29550 | 0 NA | NA | NA | NA | NA |
| Gm29551 | 0 NA | NA | NA | NA | NA |
| Gm29552 | 0 NA | NA | NA | NA | NA |
| Gm29553 | 0 NA | NA | NA | NA | NA |
| Gm29554 | 0 NA | NA | NA | NA | NA |
| Gm29556 | 0 NA | NA | NA | NA | NA |
| Gm29558 | 0 NA | NA | NA | NA | NA |
| Gm29559 | 0 NA | NA | NA | NA | NA |
| Gm29563 | 0 NA | NA | NA | NA | NA |
| Gm29564 | 0 NA | NA | NA | NA | NA |
| Gm29567 | 0 NA | NA | NA | NA | NA |
| Gm29573 | 0 NA | NA | NA | NA | NA |
| Gm29574 | 0 NA | NA | NA | NA | NA |
| Gm29575 | 0 NA | NA | NA | NA | NA |
| Gm29576 | 0 NA | NA | NA | NA | NA |
| Gm29577 | 0 NA | NA | NA | NA | NA |
| Gm29582 | 0 NA | NA | NA | NA | NA |
| Gm29586 | 0 NA | NA | NA | NA | NA |
| Gm2959  | 0 NA | NA | NA | NA | NA |
| Gm29592 | 0 NA | NA | NA | NA | NA |
| Gm29598 | 0 NA | NA | NA | NA | NA |



|         |      |    |    |    |    |
|---------|------|----|----|----|----|
| Gm29599 | 0 NA | NA | NA | NA | NA |
| Gm29600 | 0 NA | NA | NA | NA | NA |
| Gm29602 | 0 NA | NA | NA | NA | NA |
| Gm29603 | 0 NA | NA | NA | NA | NA |
| Gm29604 | 0 NA | NA | NA | NA | NA |
| Gm29605 | 0 NA | NA | NA | NA | NA |
| Gm29607 | 0 NA | NA | NA | NA | NA |
| Gm29608 | 0 NA | NA | NA | NA | NA |
| Gm29613 | 0 NA | NA | NA | NA | NA |
| Gm29614 | 0 NA | NA | NA | NA | NA |
| Gm29615 | 0 NA | NA | NA | NA | NA |
| Gm29618 | 0 NA | NA | NA | NA | NA |
| Gm29623 | 0 NA | NA | NA | NA | NA |
| Gm29624 | 0 NA | NA | NA | NA | NA |
| Gm29627 | 0 NA | NA | NA | NA | NA |
| Gm29631 | 0 NA | NA | NA | NA | NA |
| Gm29633 | 0 NA | NA | NA | NA | NA |
| Gm29634 | 0 NA | NA | NA | NA | NA |
| Gm29635 | 0 NA | NA | NA | NA | NA |
| Gm29637 | 0 NA | NA | NA | NA | NA |
| Gm29640 | 0 NA | NA | NA | NA | NA |
| Gm29641 | 0 NA | NA | NA | NA | NA |
| Gm29644 | 0 NA | NA | NA | NA | NA |
| Gm29647 | 0 NA | NA | NA | NA | NA |
| Gm2965  | 0 NA | NA | NA | NA | NA |
| Gm29651 | 0 NA | NA | NA | NA | NA |
| Gm29652 | 0 NA | NA | NA | NA | NA |
| Gm29657 | 0 NA | NA | NA | NA | NA |
| Gm29658 | 0 NA | NA | NA | NA | NA |
| Gm29659 | 0 NA | NA | NA | NA | NA |
| Gm2966  | 0 NA | NA | NA | NA | NA |
| Gm29661 | 0 NA | NA | NA | NA | NA |
| Gm29667 | 0 NA | NA | NA | NA | NA |
| Gm29695 | 0 NA | NA | NA | NA | NA |
| Gm29696 | 0 NA | NA | NA | NA | NA |
| Gm29704 | 0 NA | NA | NA | NA | NA |
| Gm29705 | 0 NA | NA | NA | NA | NA |
| Gm29717 | 0 NA | NA | NA | NA | NA |
| Gm29725 | 0 NA | NA | NA | NA | NA |
| Gm29730 | 0 NA | NA | NA | NA | NA |
| Gm29735 | 0 NA | NA | NA | NA | NA |
| Gm2974  | 0 NA | NA | NA | NA | NA |
| Gm29740 | 0 NA | NA | NA | NA | NA |
| Gm29741 | 0 NA | NA | NA | NA | NA |
| Gm29742 | 0 NA | NA | NA | NA | NA |
| Gm29745 | 0 NA | NA | NA | NA | NA |
| Gm29747 | 0 NA | NA | NA | NA | NA |
| Gm2975  | 0 NA | NA | NA | NA | NA |
| Gm29753 | 0 NA | NA | NA | NA | NA |
| Gm29754 | 0 NA | NA | NA | NA | NA |
| Gm29755 | 0 NA | NA | NA | NA | NA |
| Gm29759 | 0 NA | NA | NA | NA | NA |
| Gm2976  | 0 NA | NA | NA | NA | NA |
| Gm29763 | 0 NA | NA | NA | NA | NA |
| Gm29764 | 0 NA | NA | NA | NA | NA |
| Gm29774 | 0 NA | NA | NA | NA | NA |
| Gm29778 | 0 NA | NA | NA | NA | NA |
| Gm29781 | 0 NA | NA | NA | NA | NA |
| Gm29783 | 0 NA | NA | NA | NA | NA |
| Gm29784 | 0 NA | NA | NA | NA | NA |
| Gm29785 | 0 NA | NA | NA | NA | NA |
| Gm29787 | 0 NA | NA | NA | NA | NA |
| Gm2979  | 0 NA | NA | NA | NA | NA |
| Gm29799 | 0 NA | NA | NA | NA | NA |
| Gm29800 | 0 NA | NA | NA | NA | NA |
| Gm29807 | 0 NA | NA | NA | NA | NA |

|         |      |    |    |    |    |
|---------|------|----|----|----|----|
| Gm29808 | 0 NA | NA | NA | NA | NA |
| Gm29809 | 0 NA | NA | NA | NA | NA |
| Gm2981  | 0 NA | NA | NA | NA | NA |
| Gm29813 | 0 NA | NA | NA | NA | NA |
| Gm29815 | 0 NA | NA | NA | NA | NA |
| Gm29817 | 0 NA | NA | NA | NA | NA |
| Gm29818 | 0 NA | NA | NA | NA | NA |
| Gm29844 | 0 NA | NA | NA | NA | NA |
| Gm29848 | 0 NA | NA | NA | NA | NA |
| Gm29866 | 0 NA | NA | NA | NA | NA |
| Gm29884 | 0 NA | NA | NA | NA | NA |
| Gm2991  | 0 NA | NA | NA | NA | NA |
| Gm29920 | 0 NA | NA | NA | NA | NA |
| Gm29950 | 0 NA | NA | NA | NA | NA |
| Gm2996  | 0 NA | NA | NA | NA | NA |
| Gm29977 | 0 NA | NA | NA | NA | NA |
| Gm2999  | 0 NA | NA | NA | NA | NA |
| Gm30023 | 0 NA | NA | NA | NA | NA |
| Gm3005  | 0 NA | NA | NA | NA | NA |
| Gm3008  | 0 NA | NA | NA | NA | NA |
| Gm30083 | 0 NA | NA | NA | NA | NA |
| Gm3010  | 0 NA | NA | NA | NA | NA |
| Gm3011  | 0 NA | NA | NA | NA | NA |
| Gm3012  | 0 NA | NA | NA | NA | NA |
| Gm3015  | 0 NA | NA | NA | NA | NA |
| Gm30155 | 0 NA | NA | NA | NA | NA |
| Gm3017  | 0 NA | NA | NA | NA | NA |
| Gm30175 | 0 NA | NA | NA | NA | NA |
| Gm30191 | 0 NA | NA | NA | NA | NA |
| Gm30196 | 0 NA | NA | NA | NA | NA |
| Gm3025  | 0 NA | NA | NA | NA | NA |
| Gm3027  | 0 NA | NA | NA | NA | NA |
| Gm3028  | 0 NA | NA | NA | NA | NA |
| Gm3029  | 0 NA | NA | NA | NA | NA |
| Gm3030  | 0 NA | NA | NA | NA | NA |
| Gm30302 | 0 NA | NA | NA | NA | NA |
| Gm30312 | 0 NA | NA | NA | NA | NA |
| Gm3033  | 0 NA | NA | NA | NA | NA |
| Gm30341 | 0 NA | NA | NA | NA | NA |
| Gm3043  | 0 NA | NA | NA | NA | NA |
| Gm3045  | 0 NA | NA | NA | NA | NA |
| Gm3047  | 0 NA | NA | NA | NA | NA |
| Gm30517 | 0 NA | NA | NA | NA | NA |
| Gm3053  | 0 NA | NA | NA | NA | NA |
| Gm30534 | 0 NA | NA | NA | NA | NA |
| Gm30598 | 0 NA | NA | NA | NA | NA |
| Gm30619 | 0 NA | NA | NA | NA | NA |
| Gm30638 | 0 NA | NA | NA | NA | NA |
| Gm30652 | 0 NA | NA | NA | NA | NA |
| Gm30671 | 0 NA | NA | NA | NA | NA |
| Gm30674 | 0 NA | NA | NA | NA | NA |
| Gm30694 | 0 NA | NA | NA | NA | NA |
| Gm30708 | 0 NA | NA | NA | NA | NA |
| Gm3072  | 0 NA | NA | NA | NA | NA |
| Gm30737 | 0 NA | NA | NA | NA | NA |
| Gm30738 | 0 NA | NA | NA | NA | NA |
| Gm30747 | 0 NA | NA | NA | NA | NA |
| Gm3076  | 0 NA | NA | NA | NA | NA |
| Gm3077  | 0 NA | NA | NA | NA | NA |
| Gm30839 | 0 NA | NA | NA | NA | NA |
| Gm3084  | 0 NA | NA | NA | NA | NA |
| Gm30858 | 0 NA | NA | NA | NA | NA |
| Gm3089  | 0 NA | NA | NA | NA | NA |
| Gm3091  | 0 NA | NA | NA | NA | NA |
| Gm30946 | 0 NA | NA | NA | NA | NA |
| Gm3096  | 0 NA | NA | NA | NA | NA |

|         |      |    |    |    |    |
|---------|------|----|----|----|----|
| Gm3099  | 0 NA | NA | NA | NA | NA |
| Gm3102  | 0 NA | NA | NA | NA | NA |
| Gm3103  | 0 NA | NA | NA | NA | NA |
| Gm3104  | 0 NA | NA | NA | NA | NA |
| Gm3106  | 0 NA | NA | NA | NA | NA |
| Gm31104 | 0 NA | NA | NA | NA | NA |
| Gm3111  | 0 NA | NA | NA | NA | NA |
| Gm31123 | 0 NA | NA | NA | NA | NA |
| Gm3115  | 0 NA | NA | NA | NA | NA |
| Gm3116  | 0 NA | NA | NA | NA | NA |
| Gm31186 | 0 NA | NA | NA | NA | NA |
| Gm31191 | 0 NA | NA | NA | NA | NA |
| Gm3121  | 0 NA | NA | NA | NA | NA |
| Gm31211 | 0 NA | NA | NA | NA | NA |
| Gm3123  | 0 NA | NA | NA | NA | NA |
| Gm31256 | 0 NA | NA | NA | NA | NA |
| Gm3126  | 0 NA | NA | NA | NA | NA |
| Gm31260 | 0 NA | NA | NA | NA | NA |
| Gm3127  | 0 NA | NA | NA | NA | NA |
| Gm3131  | 0 NA | NA | NA | NA | NA |
| Gm31323 | 0 NA | NA | NA | NA | NA |
| Gm31335 | 0 NA | NA | NA | NA | NA |
| Gm31371 | 0 NA | NA | NA | NA | NA |
| Gm3138  | 0 NA | NA | NA | NA | NA |
| Gm3140  | 0 NA | NA | NA | NA | NA |
| Gm3141  | 0 NA | NA | NA | NA | NA |
| Gm3142  | 0 NA | NA | NA | NA | NA |
| Gm3145  | 0 NA | NA | NA | NA | NA |
| Gm3147  | 0 NA | NA | NA | NA | NA |
| Gm3148  | 0 NA | NA | NA | NA | NA |
| Gm3149  | 0 NA | NA | NA | NA | NA |
| Gm31511 | 0 NA | NA | NA | NA | NA |
| Gm31544 | 0 NA | NA | NA | NA | NA |
| Gm31571 | 0 NA | NA | NA | NA | NA |
| Gm31572 | 0 NA | NA | NA | NA | NA |
| Gm3159  | 0 NA | NA | NA | NA | NA |
| Gm3160  | 0 NA | NA | NA | NA | NA |
| Gm3164  | 0 NA | NA | NA | NA | NA |
| Gm31711 | 0 NA | NA | NA | NA | NA |
| Gm3176  | 0 NA | NA | NA | NA | NA |
| Gm3182  | 0 NA | NA | NA | NA | NA |
| Gm31848 | 0 NA | NA | NA | NA | NA |
| Gm31849 | 0 NA | NA | NA | NA | NA |
| Gm31861 | 0 NA | NA | NA | NA | NA |
| Gm3187  | 0 NA | NA | NA | NA | NA |
| Gm3189  | 0 NA | NA | NA | NA | NA |
| Gm3191  | 0 NA | NA | NA | NA | NA |
| Gm31931 | 0 NA | NA | NA | NA | NA |
| Gm3198  | 0 NA | NA | NA | NA | NA |
| Gm32025 | 0 NA | NA | NA | NA | NA |
| Gm3203  | 0 NA | NA | NA | NA | NA |
| Gm32033 | 0 NA | NA | NA | NA | NA |
| Gm32072 | 0 NA | NA | NA | NA | NA |
| Gm3208  | 0 NA | NA | NA | NA | NA |
| Gm32102 | 0 NA | NA | NA | NA | NA |
| Gm32111 | 0 NA | NA | NA | NA | NA |
| Gm3213  | 0 NA | NA | NA | NA | NA |
| Gm3216  | 0 NA | NA | NA | NA | NA |
| Gm32175 | 0 NA | NA | NA | NA | NA |
| Gm32180 | 0 NA | NA | NA | NA | NA |
| Gm3221  | 0 NA | NA | NA | NA | NA |
| Gm32220 | 0 NA | NA | NA | NA | NA |
| Gm32222 | 0 NA | NA | NA | NA | NA |
| Gm32295 | 0 NA | NA | NA | NA | NA |
| Gm32300 | 0 NA | NA | NA | NA | NA |
| Gm32308 | 0 NA | NA | NA | NA | NA |

|         |      |    |    |    |    |
|---------|------|----|----|----|----|
| Gm3233  | 0 NA | NA | NA | NA | NA |
| Gm32340 | 0 NA | NA | NA | NA | NA |
| Gm32347 | 0 NA | NA | NA | NA | NA |
| Gm3238  | 0 NA | NA | NA | NA | NA |
| Gm32381 | 0 NA | NA | NA | NA | NA |
| Gm3239  | 0 NA | NA | NA | NA | NA |
| Gm32390 | 0 NA | NA | NA | NA | NA |
| Gm3242  | 0 NA | NA | NA | NA | NA |
| Gm32447 | 0 NA | NA | NA | NA | NA |
| Gm32460 | 0 NA | NA | NA | NA | NA |
| Gm3250  | 0 NA | NA | NA | NA | NA |
| Gm32526 | 0 NA | NA | NA | NA | NA |
| Gm32536 | 0 NA | NA | NA | NA | NA |
| Gm3257  | 0 NA | NA | NA | NA | NA |
| Gm3259  | 0 NA | NA | NA | NA | NA |
| Gm3261  | 0 NA | NA | NA | NA | NA |
| Gm3264  | 0 NA | NA | NA | NA | NA |
| Gm3267  | 0 NA | NA | NA | NA | NA |
| Gm3269  | 0 NA | NA | NA | NA | NA |
| Gm32717 | 0 NA | NA | NA | NA | NA |
| Gm3275  | 0 NA | NA | NA | NA | NA |
| Gm3278  | 0 NA | NA | NA | NA | NA |
| Gm32802 | 0 NA | NA | NA | NA | NA |
| Gm3283  | 0 NA | NA | NA | NA | NA |
| Gm3285  | 0 NA | NA | NA | NA | NA |
| Gm3286  | 0 NA | NA | NA | NA | NA |
| Gm32899 | 0 NA | NA | NA | NA | NA |
| Gm32936 | 0 NA | NA | NA | NA | NA |
| Gm3298  | 0 NA | NA | NA | NA | NA |
| Gm32983 | 0 NA | NA | NA | NA | NA |
| Gm32996 | 0 NA | NA | NA | NA | NA |
| Gm3302  | 0 NA | NA | NA | NA | NA |
| Gm33022 | 0 NA | NA | NA | NA | NA |
| Gm3307  | 0 NA | NA | NA | NA | NA |
| Gm33080 | 0 NA | NA | NA | NA | NA |
| Gm33096 | 0 NA | NA | NA | NA | NA |
| Gm33112 | 0 NA | NA | NA | NA | NA |
| Gm33121 | 0 NA | NA | NA | NA | NA |
| Gm33163 | 0 NA | NA | NA | NA | NA |
| Gm3317  | 0 NA | NA | NA | NA | NA |
| Gm33178 | 0 NA | NA | NA | NA | NA |
| Gm3318  | 0 NA | NA | NA | NA | NA |
| Gm33191 | 0 NA | NA | NA | NA | NA |
| Gm3321  | 0 NA | NA | NA | NA | NA |
| Gm33242 | 0 NA | NA | NA | NA | NA |
| Gm3326  | 0 NA | NA | NA | NA | NA |
| Gm3327  | 0 NA | NA | NA | NA | NA |
| Gm3329  | 0 NA | NA | NA | NA | NA |
| Gm3332  | 0 NA | NA | NA | NA | NA |
| Gm3333  | 0 NA | NA | NA | NA | NA |
| Gm3338  | 0 NA | NA | NA | NA | NA |
| Gm3339  | 0 NA | NA | NA | NA | NA |
| Gm3344  | 0 NA | NA | NA | NA | NA |
| Gm3351  | 0 NA | NA | NA | NA | NA |
| Gm33571 | 0 NA | NA | NA | NA | NA |
| Gm33601 | 0 NA | NA | NA | NA | NA |
| Gm33626 | 0 NA | NA | NA | NA | NA |
| Gm33654 | 0 NA | NA | NA | NA | NA |
| Gm33666 | 0 NA | NA | NA | NA | NA |
| Gm3370  | 0 NA | NA | NA | NA | NA |
| Gm33700 | 0 NA | NA | NA | NA | NA |
| Gm3371  | 0 NA | NA | NA | NA | NA |
| Gm3372  | 0 NA | NA | NA | NA | NA |
| Gm3376  | 0 NA | NA | NA | NA | NA |
| Gm33778 | 0 NA | NA | NA | NA | NA |
| Gm33815 | 0 NA | NA | NA | NA | NA |

|         |      |    |    |    |    |
|---------|------|----|----|----|----|
| Gm33866 | 0 NA | NA | NA | NA | NA |
| Gm33882 | 0 NA | NA | NA | NA | NA |
| Gm33962 | 0 NA | NA | NA | NA | NA |
| Gm34005 | 0 NA | NA | NA | NA | NA |
| Gm34015 | 0 NA | NA | NA | NA | NA |
| Gm3402  | 0 NA | NA | NA | NA | NA |
| Gm34023 | 0 NA | NA | NA | NA | NA |
| Gm3404  | 0 NA | NA | NA | NA | NA |
| Gm3409  | 0 NA | NA | NA | NA | NA |
| Gm34091 | 0 NA | NA | NA | NA | NA |
| Gm34139 | 0 NA | NA | NA | NA | NA |
| Gm34149 | 0 NA | NA | NA | NA | NA |
| Gm3415  | 0 NA | NA | NA | NA | NA |
| Gm34165 | 0 NA | NA | NA | NA | NA |
| Gm34176 | 0 NA | NA | NA | NA | NA |
| Gm34198 | 0 NA | NA | NA | NA | NA |
| Gm34224 | 0 NA | NA | NA | NA | NA |
| Gm3424  | 0 NA | NA | NA | NA | NA |
| Gm34272 | 0 NA | NA | NA | NA | NA |
| Gm34274 | 0 NA | NA | NA | NA | NA |
| Gm34314 | 0 NA | NA | NA | NA | NA |
| Gm3433  | 0 NA | NA | NA | NA | NA |
| Gm3436  | 0 NA | NA | NA | NA | NA |
| Gm34379 | 0 NA | NA | NA | NA | NA |
| Gm34424 | 0 NA | NA | NA | NA | NA |
| Gm3443  | 0 NA | NA | NA | NA | NA |
| Gm34440 | 0 NA | NA | NA | NA | NA |
| Gm3453  | 0 NA | NA | NA | NA | NA |
| Gm3454  | 0 NA | NA | NA | NA | NA |
| Gm34583 | 0 NA | NA | NA | NA | NA |
| Gm34593 | 0 NA | NA | NA | NA | NA |
| Gm3460  | 0 NA | NA | NA | NA | NA |
| Gm3466  | 0 NA | NA | NA | NA | NA |
| Gm3470  | 0 NA | NA | NA | NA | NA |
| Gm34701 | 0 NA | NA | NA | NA | NA |
| Gm34727 | 0 NA | NA | NA | NA | NA |
| Gm3473  | 0 NA | NA | NA | NA | NA |
| Gm3476  | 0 NA | NA | NA | NA | NA |
| Gm34768 | 0 NA | NA | NA | NA | NA |
| Gm34779 | 0 NA | NA | NA | NA | NA |
| Gm34783 | 0 NA | NA | NA | NA | NA |
| Gm3486  | 0 NA | NA | NA | NA | NA |
| Gm3489  | 0 NA | NA | NA | NA | NA |
| Gm3496  | 0 NA | NA | NA | NA | NA |
| Gm35106 | 0 NA | NA | NA | NA | NA |
| Gm35108 | 0 NA | NA | NA | NA | NA |
| Gm3511  | 0 NA | NA | NA | NA | NA |
| Gm35134 | 0 NA | NA | NA | NA | NA |
| Gm35160 | 0 NA | NA | NA | NA | NA |
| Gm35212 | 0 NA | NA | NA | NA | NA |
| Gm3523  | 0 NA | NA | NA | NA | NA |
| Gm3526  | 0 NA | NA | NA | NA | NA |
| Gm35262 | 0 NA | NA | NA | NA | NA |
| Gm3527  | 0 NA | NA | NA | NA | NA |
| Gm3532  | 0 NA | NA | NA | NA | NA |
| Gm35323 | 0 NA | NA | NA | NA | NA |
| Gm35389 | 0 NA | NA | NA | NA | NA |
| Gm35412 | 0 NA | NA | NA | NA | NA |
| Gm3542  | 0 NA | NA | NA | NA | NA |
| Gm3543  | 0 NA | NA | NA | NA | NA |
| Gm3544  | 0 NA | NA | NA | NA | NA |
| Gm3549  | 0 NA | NA | NA | NA | NA |
| Gm3551  | 0 NA | NA | NA | NA | NA |
| Gm35549 | 0 NA | NA | NA | NA | NA |
| Gm3555  | 0 NA | NA | NA | NA | NA |
| Gm35595 | 0 NA | NA | NA | NA | NA |

|         |      |    |    |    |    |
|---------|------|----|----|----|----|
| Gm35619 | 0 NA | NA | NA | NA | NA |
| Gm35629 | 0 NA | NA | NA | NA | NA |
| Gm3565  | 0 NA | NA | NA | NA | NA |
| Gm35702 | 0 NA | NA | NA | NA | NA |
| Gm35713 | 0 NA | NA | NA | NA | NA |
| Gm3573  | 0 NA | NA | NA | NA | NA |
| Gm35736 | 0 NA | NA | NA | NA | NA |
| Gm35755 | 0 NA | NA | NA | NA | NA |
| Gm3584  | 0 NA | NA | NA | NA | NA |
| Gm35843 | 0 NA | NA | NA | NA | NA |
| Gm3585  | 0 NA | NA | NA | NA | NA |
| Gm3594  | 0 NA | NA | NA | NA | NA |
| Gm35955 | 0 NA | NA | NA | NA | NA |
| Gm35960 | 0 NA | NA | NA | NA | NA |
| Gm36047 | 0 NA | NA | NA | NA | NA |
| Gm3605  | 0 NA | NA | NA | NA | NA |
| Gm36079 | 0 NA | NA | NA | NA | NA |
| Gm3611  | 0 NA | NA | NA | NA | NA |
| Gm36147 | 0 NA | NA | NA | NA | NA |
| Gm3616  | 0 NA | NA | NA | NA | NA |
| Gm36176 | 0 NA | NA | NA | NA | NA |
| Gm3618  | 0 NA | NA | NA | NA | NA |
| Gm36189 | 0 NA | NA | NA | NA | NA |
| Gm3619  | 0 NA | NA | NA | NA | NA |
| Gm3623  | 0 NA | NA | NA | NA | NA |
| Gm36247 | 0 NA | NA | NA | NA | NA |
| Gm36259 | 0 NA | NA | NA | NA | NA |
| Gm3633  | 0 NA | NA | NA | NA | NA |
| Gm3637  | 0 NA | NA | NA | NA | NA |
| Gm36382 | 0 NA | NA | NA | NA | NA |
| Gm36398 | 0 NA | NA | NA | NA | NA |
| Gm364   | 0 NA | NA | NA | NA | NA |
| Gm3642  | 0 NA | NA | NA | NA | NA |
| Gm3646  | 0 NA | NA | NA | NA | NA |
| Gm36468 | 0 NA | NA | NA | NA | NA |
| Gm3657  | 0 NA | NA | NA | NA | NA |
| Gm3665  | 0 NA | NA | NA | NA | NA |
| Gm36704 | 0 NA | NA | NA | NA | NA |
| Gm36728 | 0 NA | NA | NA | NA | NA |
| Gm3675  | 0 NA | NA | NA | NA | NA |
| Gm36758 | 0 NA | NA | NA | NA | NA |
| Gm3676  | 0 NA | NA | NA | NA | NA |
| Gm36776 | 0 NA | NA | NA | NA | NA |
| Gm3678  | 0 NA | NA | NA | NA | NA |
| Gm3681  | 0 NA | NA | NA | NA | NA |
| Gm3683  | 0 NA | NA | NA | NA | NA |
| Gm3685  | 0 NA | NA | NA | NA | NA |
| Gm36858 | 0 NA | NA | NA | NA | NA |
| Gm36864 | 0 NA | NA | NA | NA | NA |
| Gm36866 | 0 NA | NA | NA | NA | NA |
| Gm3687  | 0 NA | NA | NA | NA | NA |
| Gm36891 | 0 NA | NA | NA | NA | NA |
| Gm3690  | 0 NA | NA | NA | NA | NA |
| Gm36928 | 0 NA | NA | NA | NA | NA |
| Gm36934 | 0 NA | NA | NA | NA | NA |
| Gm36953 | 0 NA | NA | NA | NA | NA |
| Gm36964 | 0 NA | NA | NA | NA | NA |
| Gm36965 | 0 NA | NA | NA | NA | NA |
| Gm36968 | 0 NA | NA | NA | NA | NA |
| Gm36973 | 0 NA | NA | NA | NA | NA |
| Gm36978 | 0 NA | NA | NA | NA | NA |
| Gm36980 | 0 NA | NA | NA | NA | NA |
| Gm36983 | 0 NA | NA | NA | NA | NA |
| Gm36984 | 0 NA | NA | NA | NA | NA |
| Gm3699  | 0 NA | NA | NA | NA | NA |
| Gm36996 | 0 NA | NA | NA | NA | NA |

|         |      |    |    |    |    |
|---------|------|----|----|----|----|
| Gm36998 | 0 NA | NA | NA | NA | NA |
| Gm37000 | 0 NA | NA | NA | NA | NA |
| Gm37001 | 0 NA | NA | NA | NA | NA |
| Gm37007 | 0 NA | NA | NA | NA | NA |
| Gm37013 | 0 NA | NA | NA | NA | NA |
| Gm3702  | 0 NA | NA | NA | NA | NA |
| Gm37029 | 0 NA | NA | NA | NA | NA |
| Gm37030 | 0 NA | NA | NA | NA | NA |
| Gm37037 | 0 NA | NA | NA | NA | NA |
| Gm37044 | 0 NA | NA | NA | NA | NA |
| Gm37050 | 0 NA | NA | NA | NA | NA |
| Gm37081 | 0 NA | NA | NA | NA | NA |
| Gm37085 | 0 NA | NA | NA | NA | NA |
| Gm37089 | 0 NA | NA | NA | NA | NA |
| Gm37095 | 0 NA | NA | NA | NA | NA |
| Gm371   | 0 NA | NA | NA | NA | NA |
| Gm37103 | 0 NA | NA | NA | NA | NA |
| Gm37104 | 0 NA | NA | NA | NA | NA |
| Gm3711  | 0 NA | NA | NA | NA | NA |
| Gm37128 | 0 NA | NA | NA | NA | NA |
| Gm37129 | 0 NA | NA | NA | NA | NA |
| Gm3715  | 0 NA | NA | NA | NA | NA |
| Gm37155 | 0 NA | NA | NA | NA | NA |
| Gm37172 | 0 NA | NA | NA | NA | NA |
| Gm37177 | 0 NA | NA | NA | NA | NA |
| Gm37185 | 0 NA | NA | NA | NA | NA |
| Gm37187 | 0 NA | NA | NA | NA | NA |
| Gm37197 | 0 NA | NA | NA | NA | NA |
| Gm37201 | 0 NA | NA | NA | NA | NA |
| Gm37203 | 0 NA | NA | NA | NA | NA |
| Gm37207 | 0 NA | NA | NA | NA | NA |
| Gm37213 | 0 NA | NA | NA | NA | NA |
| Gm37224 | 0 NA | NA | NA | NA | NA |
| Gm37225 | 0 NA | NA | NA | NA | NA |
| Gm37227 | 0 NA | NA | NA | NA | NA |
| Gm37232 | 0 NA | NA | NA | NA | NA |
| Gm37237 | 0 NA | NA | NA | NA | NA |
| Gm37239 | 0 NA | NA | NA | NA | NA |
| Gm3726  | 0 NA | NA | NA | NA | NA |
| Gm3727  | 0 NA | NA | NA | NA | NA |
| Gm37275 | 0 NA | NA | NA | NA | NA |
| Gm37281 | 0 NA | NA | NA | NA | NA |
| Gm37287 | 0 NA | NA | NA | NA | NA |
| Gm37288 | 0 NA | NA | NA | NA | NA |
| Gm37290 | 0 NA | NA | NA | NA | NA |
| Gm37301 | 0 NA | NA | NA | NA | NA |
| Gm37308 | 0 NA | NA | NA | NA | NA |
| Gm37313 | 0 NA | NA | NA | NA | NA |
| Gm37318 | 0 NA | NA | NA | NA | NA |
| Gm37325 | 0 NA | NA | NA | NA | NA |
| Gm37327 | 0 NA | NA | NA | NA | NA |
| Gm37330 | 0 NA | NA | NA | NA | NA |
| Gm37348 | 0 NA | NA | NA | NA | NA |
| Gm37358 | 0 NA | NA | NA | NA | NA |
| Gm37361 | 0 NA | NA | NA | NA | NA |
| Gm37365 | 0 NA | NA | NA | NA | NA |
| Gm37369 | 0 NA | NA | NA | NA | NA |
| Gm37377 | 0 NA | NA | NA | NA | NA |
| Gm37380 | 0 NA | NA | NA | NA | NA |
| Gm37388 | 0 NA | NA | NA | NA | NA |
| Gm37389 | 0 NA | NA | NA | NA | NA |
| Gm37395 | 0 NA | NA | NA | NA | NA |
| Gm37417 | 0 NA | NA | NA | NA | NA |
| Gm37418 | 0 NA | NA | NA | NA | NA |
| Gm3742  | 0 NA | NA | NA | NA | NA |
| Gm37421 | 0 NA | NA | NA | NA | NA |

|         |      |    |    |    |    |
|---------|------|----|----|----|----|
| Gm37424 | 0 NA | NA | NA | NA | NA |
| Gm37428 | 0 NA | NA | NA | NA | NA |
| Gm37430 | 0 NA | NA | NA | NA | NA |
| Gm37431 | 0 NA | NA | NA | NA | NA |
| Gm37433 | 0 NA | NA | NA | NA | NA |
| Gm37441 | 0 NA | NA | NA | NA | NA |
| Gm37442 | 0 NA | NA | NA | NA | NA |
| Gm37445 | 0 NA | NA | NA | NA | NA |
| Gm37448 | 0 NA | NA | NA | NA | NA |
| Gm37449 | 0 NA | NA | NA | NA | NA |
| Gm37450 | 0 NA | NA | NA | NA | NA |
| Gm37476 | 0 NA | NA | NA | NA | NA |
| Gm37481 | 0 NA | NA | NA | NA | NA |
| Gm37486 | 0 NA | NA | NA | NA | NA |
| Gm37489 | 0 NA | NA | NA | NA | NA |
| Gm3749  | 0 NA | NA | NA | NA | NA |
| Gm37492 | 0 NA | NA | NA | NA | NA |
| Gm37493 | 0 NA | NA | NA | NA | NA |
| Gm37501 | 0 NA | NA | NA | NA | NA |
| Gm37511 | 0 NA | NA | NA | NA | NA |
| Gm37523 | 0 NA | NA | NA | NA | NA |
| Gm37545 | 0 NA | NA | NA | NA | NA |
| Gm37550 | 0 NA | NA | NA | NA | NA |
| Gm37557 | 0 NA | NA | NA | NA | NA |
| Gm3757  | 0 NA | NA | NA | NA | NA |
| Gm37575 | 0 NA | NA | NA | NA | NA |
| Gm37576 | 0 NA | NA | NA | NA | NA |
| Gm37579 | 0 NA | NA | NA | NA | NA |
| Gm37585 | 0 NA | NA | NA | NA | NA |
| Gm37586 | 0 NA | NA | NA | NA | NA |
| Gm37597 | 0 NA | NA | NA | NA | NA |
| Gm3760  | 0 NA | NA | NA | NA | NA |
| Gm37603 | 0 NA | NA | NA | NA | NA |
| Gm37616 | 0 NA | NA | NA | NA | NA |
| Gm37617 | 0 NA | NA | NA | NA | NA |
| Gm37619 | 0 NA | NA | NA | NA | NA |
| Gm37627 | 0 NA | NA | NA | NA | NA |
| Gm37636 | 0 NA | NA | NA | NA | NA |
| Gm37658 | 0 NA | NA | NA | NA | NA |
| Gm37659 | 0 NA | NA | NA | NA | NA |
| Gm37670 | 0 NA | NA | NA | NA | NA |
| Gm37681 | 0 NA | NA | NA | NA | NA |
| Gm37682 | 0 NA | NA | NA | NA | NA |
| Gm37684 | 0 NA | NA | NA | NA | NA |
| Gm37688 | 0 NA | NA | NA | NA | NA |
| Gm37692 | 0 NA | NA | NA | NA | NA |
| Gm37693 | 0 NA | NA | NA | NA | NA |
| Gm37715 | 0 NA | NA | NA | NA | NA |
| Gm37719 | 0 NA | NA | NA | NA | NA |
| Gm37722 | 0 NA | NA | NA | NA | NA |
| Gm37723 | 0 NA | NA | NA | NA | NA |
| Gm37732 | 0 NA | NA | NA | NA | NA |
| Gm3774  | 0 NA | NA | NA | NA | NA |
| Gm37757 | 0 NA | NA | NA | NA | NA |
| Gm37763 | 0 NA | NA | NA | NA | NA |
| Gm37765 | 0 NA | NA | NA | NA | NA |
| Gm37770 | 0 NA | NA | NA | NA | NA |
| Gm37771 | 0 NA | NA | NA | NA | NA |
| Gm37778 | 0 NA | NA | NA | NA | NA |
| Gm3778  | 0 NA | NA | NA | NA | NA |
| Gm37784 | 0 NA | NA | NA | NA | NA |
| Gm37791 | 0 NA | NA | NA | NA | NA |
| Gm37793 | 0 NA | NA | NA | NA | NA |
| Gm37797 | 0 NA | NA | NA | NA | NA |
| Gm378   | 0 NA | NA | NA | NA | NA |
| Gm37801 | 0 NA | NA | NA | NA | NA |



|         |      |    |    |    |    |
|---------|------|----|----|----|----|
| Gm37807 | 0 NA | NA | NA | NA | NA |
| Gm37826 | 0 NA | NA | NA | NA | NA |
| Gm37832 | 0 NA | NA | NA | NA | NA |
| Gm37835 | 0 NA | NA | NA | NA | NA |
| Gm37836 | 0 NA | NA | NA | NA | NA |
| Gm37838 | 0 NA | NA | NA | NA | NA |
| Gm37841 | 0 NA | NA | NA | NA | NA |
| Gm37845 | 0 NA | NA | NA | NA | NA |
| Gm3785  | 0 NA | NA | NA | NA | NA |
| Gm3786  | 0 NA | NA | NA | NA | NA |
| Gm37878 | 0 NA | NA | NA | NA | NA |
| Gm3788  | 0 NA | NA | NA | NA | NA |
| Gm37882 | 0 NA | NA | NA | NA | NA |
| Gm37901 | 0 NA | NA | NA | NA | NA |
| Gm37904 | 0 NA | NA | NA | NA | NA |
| Gm37918 | 0 NA | NA | NA | NA | NA |
| Gm37921 | 0 NA | NA | NA | NA | NA |
| Gm37922 | 0 NA | NA | NA | NA | NA |
| Gm37944 | 0 NA | NA | NA | NA | NA |
| Gm37961 | 0 NA | NA | NA | NA | NA |
| Gm37976 | 0 NA | NA | NA | NA | NA |
| Gm37981 | 0 NA | NA | NA | NA | NA |
| Gm37990 | 0 NA | NA | NA | NA | NA |
| Gm37991 | 0 NA | NA | NA | NA | NA |
| Gm37994 | 0 NA | NA | NA | NA | NA |
| Gm37996 | 0 NA | NA | NA | NA | NA |
| Gm3800  | 0 NA | NA | NA | NA | NA |
| Gm38002 | 0 NA | NA | NA | NA | NA |
| Gm38008 | 0 NA | NA | NA | NA | NA |
| Gm38015 | 0 NA | NA | NA | NA | NA |
| Gm38016 | 0 NA | NA | NA | NA | NA |
| Gm38017 | 0 NA | NA | NA | NA | NA |
| Gm38018 | 0 NA | NA | NA | NA | NA |
| Gm38022 | 0 NA | NA | NA | NA | NA |
| Gm38027 | 0 NA | NA | NA | NA | NA |
| Gm38030 | 0 NA | NA | NA | NA | NA |
| Gm38035 | 0 NA | NA | NA | NA | NA |
| Gm38038 | 0 NA | NA | NA | NA | NA |
| Gm38040 | 0 NA | NA | NA | NA | NA |
| Gm38041 | 0 NA | NA | NA | NA | NA |
| Gm38044 | 0 NA | NA | NA | NA | NA |
| Gm38050 | 0 NA | NA | NA | NA | NA |
| Gm38076 | 0 NA | NA | NA | NA | NA |
| Gm38078 | 0 NA | NA | NA | NA | NA |
| Gm38080 | 0 NA | NA | NA | NA | NA |
| Gm38086 | 0 NA | NA | NA | NA | NA |
| Gm38088 | 0 NA | NA | NA | NA | NA |
| Gm38098 | 0 NA | NA | NA | NA | NA |
| Gm381   | 0 NA | NA | NA | NA | NA |
| Gm3810  | 0 NA | NA | NA | NA | NA |
| Gm38107 | 0 NA | NA | NA | NA | NA |
| Gm38113 | 0 NA | NA | NA | NA | NA |
| Gm38119 | 0 NA | NA | NA | NA | NA |
| Gm38121 | 0 NA | NA | NA | NA | NA |
| Gm38131 | 0 NA | NA | NA | NA | NA |
| Gm38135 | 0 NA | NA | NA | NA | NA |
| Gm38138 | 0 NA | NA | NA | NA | NA |
| Gm38145 | 0 NA | NA | NA | NA | NA |
| Gm38151 | 0 NA | NA | NA | NA | NA |
| Gm38153 | 0 NA | NA | NA | NA | NA |
| Gm38154 | 0 NA | NA | NA | NA | NA |
| Gm3816  | 0 NA | NA | NA | NA | NA |
| Gm38181 | 0 NA | NA | NA | NA | NA |
| Gm38183 | 0 NA | NA | NA | NA | NA |
| Gm38184 | 0 NA | NA | NA | NA | NA |
| Gm38185 | 0 NA | NA | NA | NA | NA |

|         |      |    |    |    |    |
|---------|------|----|----|----|----|
| Gm382   | 0 NA | NA | NA | NA | NA |
| Gm38203 | 0 NA | NA | NA | NA | NA |
| Gm38205 | 0 NA | NA | NA | NA | NA |
| Gm38208 | 0 NA | NA | NA | NA | NA |
| Gm38213 | 0 NA | NA | NA | NA | NA |
| Gm38216 | 0 NA | NA | NA | NA | NA |
| Gm38229 | 0 NA | NA | NA | NA | NA |
| Gm38233 | 0 NA | NA | NA | NA | NA |
| Gm38237 | 0 NA | NA | NA | NA | NA |
| Gm38261 | 0 NA | NA | NA | NA | NA |
| Gm38266 | 0 NA | NA | NA | NA | NA |
| Gm38274 | 0 NA | NA | NA | NA | NA |
| Gm3828  | 0 NA | NA | NA | NA | NA |
| Gm38280 | 0 NA | NA | NA | NA | NA |
| Gm38288 | 0 NA | NA | NA | NA | NA |
| Gm3829  | 0 NA | NA | NA | NA | NA |
| Gm38290 | 0 NA | NA | NA | NA | NA |
| Gm38291 | 0 NA | NA | NA | NA | NA |
| Gm38294 | 0 NA | NA | NA | NA | NA |
| Gm38295 | 0 NA | NA | NA | NA | NA |
| Gm38298 | 0 NA | NA | NA | NA | NA |
| Gm38305 | 0 NA | NA | NA | NA | NA |
| Gm38306 | 0 NA | NA | NA | NA | NA |
| Gm38311 | 0 NA | NA | NA | NA | NA |
| Gm38323 | 0 NA | NA | NA | NA | NA |
| Gm38328 | 0 NA | NA | NA | NA | NA |
| Gm38332 | 0 NA | NA | NA | NA | NA |
| Gm38334 | 0 NA | NA | NA | NA | NA |
| Gm38350 | 0 NA | NA | NA | NA | NA |
| Gm3836  | 0 NA | NA | NA | NA | NA |
| Gm38360 | 0 NA | NA | NA | NA | NA |
| Gm38364 | 0 NA | NA | NA | NA | NA |
| Gm38369 | 0 NA | NA | NA | NA | NA |
| Gm38395 | 0 NA | NA | NA | NA | NA |
| Gm38430 | 0 NA | NA | NA | NA | NA |
| Gm38433 | 0 NA | NA | NA | NA | NA |
| Gm3852  | 0 NA | NA | NA | NA | NA |
| Gm38541 | 0 NA | NA | NA | NA | NA |
| Gm38574 | 0 NA | NA | NA | NA | NA |
| Gm3861  | 0 NA | NA | NA | NA | NA |
| Gm38697 | 0 NA | NA | NA | NA | NA |
| Gm38706 | 0 NA | NA | NA | NA | NA |
| Gm3880  | 0 NA | NA | NA | NA | NA |
| Gm38840 | 0 NA | NA | NA | NA | NA |
| Gm3888  | 0 NA | NA | NA | NA | NA |
| Gm3889  | 0 NA | NA | NA | NA | NA |
| Gm3890  | 0 NA | NA | NA | NA | NA |
| Gm38941 | 0 NA | NA | NA | NA | NA |
| Gm3895  | 0 NA | NA | NA | NA | NA |
| Gm39115 | 0 NA | NA | NA | NA | NA |
| Gm39197 | 0 NA | NA | NA | NA | NA |
| Gm3922  | 0 NA | NA | NA | NA | NA |
| Gm3926  | 0 NA | NA | NA | NA | NA |
| Gm3928  | 0 NA | NA | NA | NA | NA |
| Gm3931  | 0 NA | NA | NA | NA | NA |
| Gm3933  | 0 NA | NA | NA | NA | NA |
| Gm3940  | 0 NA | NA | NA | NA | NA |
| Gm39404 | 0 NA | NA | NA | NA | NA |
| Gm3943  | 0 NA | NA | NA | NA | NA |
| Gm3945  | 0 NA | NA | NA | NA | NA |
| Gm39481 | 0 NA | NA | NA | NA | NA |
| Gm3952  | 0 NA | NA | NA | NA | NA |
| Gm3956  | 0 NA | NA | NA | NA | NA |
| Gm39566 | 0 NA | NA | NA | NA | NA |
| Gm3963  | 0 NA | NA | NA | NA | NA |
| Gm3978  | 0 NA | NA | NA | NA | NA |

|         |      |    |    |    |    |
|---------|------|----|----|----|----|
| Gm40    | 0 NA | NA | NA | NA | NA |
| Gm4011  | 0 NA | NA | NA | NA | NA |
| Gm4012  | 0 NA | NA | NA | NA | NA |
| Gm40193 | 0 NA | NA | NA | NA | NA |
| Gm40318 | 0 NA | NA | NA | NA | NA |
| Gm40319 | 0 NA | NA | NA | NA | NA |
| Gm4036  | 0 NA | NA | NA | NA | NA |
| Gm40414 | 0 NA | NA | NA | NA | NA |
| Gm4042  | 0 NA | NA | NA | NA | NA |
| Gm40460 | 0 NA | NA | NA | NA | NA |
| Gm4052  | 0 NA | NA | NA | NA | NA |
| Gm4057  | 0 NA | NA | NA | NA | NA |
| Gm4059  | 0 NA | NA | NA | NA | NA |
| Gm4064  | 0 NA | NA | NA | NA | NA |
| Gm4066  | 0 NA | NA | NA | NA | NA |
| Gm40692 | 0 NA | NA | NA | NA | NA |
| Gm4073  | 0 NA | NA | NA | NA | NA |
| Gm4076  | 0 NA | NA | NA | NA | NA |
| Gm40810 | 0 NA | NA | NA | NA | NA |
| Gm40828 | 0 NA | NA | NA | NA | NA |
| Gm4083  | 0 NA | NA | NA | NA | NA |
| Gm40848 | 0 NA | NA | NA | NA | NA |
| Gm40853 | 0 NA | NA | NA | NA | NA |
| Gm40879 | 0 NA | NA | NA | NA | NA |
| Gm40976 | 0 NA | NA | NA | NA | NA |
| Gm40989 | 0 NA | NA | NA | NA | NA |
| Gm41    | 0 NA | NA | NA | NA | NA |
| Gm4106  | 0 NA | NA | NA | NA | NA |
| Gm41073 | 0 NA | NA | NA | NA | NA |
| Gm4111  | 0 NA | NA | NA | NA | NA |
| Gm41115 | 0 NA | NA | NA | NA | NA |
| Gm4116  | 0 NA | NA | NA | NA | NA |
| Gm412   | 0 NA | NA | NA | NA | NA |
| Gm4120  | 0 NA | NA | NA | NA | NA |
| Gm4134  | 0 NA | NA | NA | NA | NA |
| Gm4181  | 0 NA | NA | NA | NA | NA |
| Gm4204  | 0 NA | NA | NA | NA | NA |
| Gm4207  | 0 NA | NA | NA | NA | NA |
| Gm42164 | 0 NA | NA | NA | NA | NA |
| Gm4222  | 0 NA | NA | NA | NA | NA |
| Gm4234  | 0 NA | NA | NA | NA | NA |
| Gm4240  | 0 NA | NA | NA | NA | NA |
| Gm42402 | 0 NA | NA | NA | NA | NA |
| Gm42416 | 0 NA | NA | NA | NA | NA |
| Gm42424 | 0 NA | NA | NA | NA | NA |
| Gm42431 | 0 NA | NA | NA | NA | NA |
| Gm42451 | 0 NA | NA | NA | NA | NA |
| Gm42452 | 0 NA | NA | NA | NA | NA |
| Gm42453 | 0 NA | NA | NA | NA | NA |
| Gm42459 | 0 NA | NA | NA | NA | NA |
| Gm4246  | 0 NA | NA | NA | NA | NA |
| Gm42465 | 0 NA | NA | NA | NA | NA |
| Gm42472 | 0 NA | NA | NA | NA | NA |
| Gm42474 | 0 NA | NA | NA | NA | NA |
| Gm42475 | 0 NA | NA | NA | NA | NA |
| Gm4248  | 0 NA | NA | NA | NA | NA |
| Gm4252  | 0 NA | NA | NA | NA | NA |
| Gm42522 | 0 NA | NA | NA | NA | NA |
| Gm42525 | 0 NA | NA | NA | NA | NA |
| Gm42526 | 0 NA | NA | NA | NA | NA |
| Gm42539 | 0 NA | NA | NA | NA | NA |
| Gm42542 | 0 NA | NA | NA | NA | NA |
| Gm42543 | 0 NA | NA | NA | NA | NA |
| Gm42570 | 0 NA | NA | NA | NA | NA |
| Gm42578 | 0 NA | NA | NA | NA | NA |
| Gm42579 | 0 NA | NA | NA | NA | NA |

|         |      |    |    |    |    |
|---------|------|----|----|----|----|
| Gm42580 | 0 NA | NA | NA | NA | NA |
| Gm42581 | 0 NA | NA | NA | NA | NA |
| Gm42584 | 0 NA | NA | NA | NA | NA |
| Gm4259  | 0 NA | NA | NA | NA | NA |
| Gm42593 | 0 NA | NA | NA | NA | NA |
| Gm42606 | 0 NA | NA | NA | NA | NA |
| Gm42612 | 0 NA | NA | NA | NA | NA |
| Gm42621 | 0 NA | NA | NA | NA | NA |
| Gm42622 | 0 NA | NA | NA | NA | NA |
| Gm42623 | 0 NA | NA | NA | NA | NA |
| Gm42627 | 0 NA | NA | NA | NA | NA |
| Gm42628 | 0 NA | NA | NA | NA | NA |
| Gm4263  | 0 NA | NA | NA | NA | NA |
| Gm42643 | 0 NA | NA | NA | NA | NA |
| Gm42652 | 0 NA | NA | NA | NA | NA |
| Gm42657 | 0 NA | NA | NA | NA | NA |
| Gm4266  | 0 NA | NA | NA | NA | NA |
| Gm42661 | 0 NA | NA | NA | NA | NA |
| Gm42662 | 0 NA | NA | NA | NA | NA |
| Gm42663 | 0 NA | NA | NA | NA | NA |
| Gm42665 | 0 NA | NA | NA | NA | NA |
| Gm42666 | 0 NA | NA | NA | NA | NA |
| Gm42667 | 0 NA | NA | NA | NA | NA |
| Gm42673 | 0 NA | NA | NA | NA | NA |
| Gm42674 | 0 NA | NA | NA | NA | NA |
| Gm42677 | 0 NA | NA | NA | NA | NA |
| Gm42689 | 0 NA | NA | NA | NA | NA |
| Gm42694 | 0 NA | NA | NA | NA | NA |
| Gm42698 | 0 NA | NA | NA | NA | NA |
| Gm4270  | 0 NA | NA | NA | NA | NA |
| Gm4271  | 0 NA | NA | NA | NA | NA |
| Gm42714 | 0 NA | NA | NA | NA | NA |
| Gm42719 | 0 NA | NA | NA | NA | NA |
| Gm42720 | 0 NA | NA | NA | NA | NA |
| Gm42739 | 0 NA | NA | NA | NA | NA |
| Gm42758 | 0 NA | NA | NA | NA | NA |
| Gm42760 | 0 NA | NA | NA | NA | NA |
| Gm42773 | 0 NA | NA | NA | NA | NA |
| Gm42774 | 0 NA | NA | NA | NA | NA |
| Gm42786 | 0 NA | NA | NA | NA | NA |
| Gm42795 | 0 NA | NA | NA | NA | NA |
| Gm42799 | 0 NA | NA | NA | NA | NA |
| Gm428   | 0 NA | NA | NA | NA | NA |
| Gm42804 | 0 NA | NA | NA | NA | NA |
| Gm42805 | 0 NA | NA | NA | NA | NA |
| Gm42807 | 0 NA | NA | NA | NA | NA |
| Gm42816 | 0 NA | NA | NA | NA | NA |
| Gm42818 | 0 NA | NA | NA | NA | NA |
| Gm42821 | 0 NA | NA | NA | NA | NA |
| Gm42824 | 0 NA | NA | NA | NA | NA |
| Gm42828 | 0 NA | NA | NA | NA | NA |
| Gm42832 | 0 NA | NA | NA | NA | NA |
| Gm42834 | 0 NA | NA | NA | NA | NA |
| Gm42844 | 0 NA | NA | NA | NA | NA |
| Gm42845 | 0 NA | NA | NA | NA | NA |
| Gm42850 | 0 NA | NA | NA | NA | NA |
| Gm42855 | 0 NA | NA | NA | NA | NA |
| Gm42859 | 0 NA | NA | NA | NA | NA |
| Gm42861 | 0 NA | NA | NA | NA | NA |
| Gm4287  | 0 NA | NA | NA | NA | NA |
| Gm42883 | 0 NA | NA | NA | NA | NA |
| Gm42886 | 0 NA | NA | NA | NA | NA |
| Gm4290  | 0 NA | NA | NA | NA | NA |
| Gm42906 | 0 NA | NA | NA | NA | NA |
| Gm42911 | 0 NA | NA | NA | NA | NA |
| Gm42924 | 0 NA | NA | NA | NA | NA |

|         |      |    |    |    |    |
|---------|------|----|----|----|----|
| Gm42925 | 0 NA | NA | NA | NA | NA |
| Gm42932 | 0 NA | NA | NA | NA | NA |
| Gm42933 | 0 NA | NA | NA | NA | NA |
| Gm42958 | 0 NA | NA | NA | NA | NA |
| Gm42960 | 0 NA | NA | NA | NA | NA |
| Gm42961 | 0 NA | NA | NA | NA | NA |
| Gm42964 | 0 NA | NA | NA | NA | NA |
| Gm42965 | 0 NA | NA | NA | NA | NA |
| Gm42976 | 0 NA | NA | NA | NA | NA |
| Gm42977 | 0 NA | NA | NA | NA | NA |
| Gm42988 | 0 NA | NA | NA | NA | NA |
| Gm42990 | 0 NA | NA | NA | NA | NA |
| Gm42999 | 0 NA | NA | NA | NA | NA |
| Gm43007 | 0 NA | NA | NA | NA | NA |
| Gm43013 | 0 NA | NA | NA | NA | NA |
| Gm43015 | 0 NA | NA | NA | NA | NA |
| Gm43026 | 0 NA | NA | NA | NA | NA |
| Gm43033 | 0 NA | NA | NA | NA | NA |
| Gm43035 | 0 NA | NA | NA | NA | NA |
| Gm43037 | 0 NA | NA | NA | NA | NA |
| Gm43038 | 0 NA | NA | NA | NA | NA |
| Gm43043 | 0 NA | NA | NA | NA | NA |
| Gm43044 | 0 NA | NA | NA | NA | NA |
| Gm43060 | 0 NA | NA | NA | NA | NA |
| Gm43083 | 0 NA | NA | NA | NA | NA |
| Gm43089 | 0 NA | NA | NA | NA | NA |
| Gm43090 | 0 NA | NA | NA | NA | NA |
| Gm43096 | 0 NA | NA | NA | NA | NA |
| Gm43097 | 0 NA | NA | NA | NA | NA |
| Gm4310  | 0 NA | NA | NA | NA | NA |
| Gm43104 | 0 NA | NA | NA | NA | NA |
| Gm43105 | 0 NA | NA | NA | NA | NA |
| Gm43115 | 0 NA | NA | NA | NA | NA |
| Gm43116 | 0 NA | NA | NA | NA | NA |
| Gm43117 | 0 NA | NA | NA | NA | NA |
| Gm43124 | 0 NA | NA | NA | NA | NA |
| Gm43125 | 0 NA | NA | NA | NA | NA |
| Gm43139 | 0 NA | NA | NA | NA | NA |
| Gm43141 | 0 NA | NA | NA | NA | NA |
| Gm43142 | 0 NA | NA | NA | NA | NA |
| Gm43155 | 0 NA | NA | NA | NA | NA |
| Gm43157 | 0 NA | NA | NA | NA | NA |
| Gm43160 | 0 NA | NA | NA | NA | NA |
| Gm43163 | 0 NA | NA | NA | NA | NA |
| Gm43170 | 0 NA | NA | NA | NA | NA |
| Gm43171 | 0 NA | NA | NA | NA | NA |
| Gm43193 | 0 NA | NA | NA | NA | NA |
| Gm43199 | 0 NA | NA | NA | NA | NA |
| Gm4321  | 0 NA | NA | NA | NA | NA |
| Gm43212 | 0 NA | NA | NA | NA | NA |
| Gm43214 | 0 NA | NA | NA | NA | NA |
| Gm43217 | 0 NA | NA | NA | NA | NA |
| Gm43220 | 0 NA | NA | NA | NA | NA |
| Gm43222 | 0 NA | NA | NA | NA | NA |
| Gm43224 | 0 NA | NA | NA | NA | NA |
| Gm43226 | 0 NA | NA | NA | NA | NA |
| Gm43227 | 0 NA | NA | NA | NA | NA |
| Gm43228 | 0 NA | NA | NA | NA | NA |
| Gm43232 | 0 NA | NA | NA | NA | NA |
| Gm43233 | 0 NA | NA | NA | NA | NA |
| Gm43234 | 0 NA | NA | NA | NA | NA |
| Gm43235 | 0 NA | NA | NA | NA | NA |
| Gm43243 | 0 NA | NA | NA | NA | NA |
| Gm43245 | 0 NA | NA | NA | NA | NA |
| Gm43249 | 0 NA | NA | NA | NA | NA |
| Gm43250 | 0 NA | NA | NA | NA | NA |

|         |      |    |    |    |    |
|---------|------|----|----|----|----|
| Gm43264 | 0 NA | NA | NA | NA | NA |
| Gm43276 | 0 NA | NA | NA | NA | NA |
| Gm43284 | 0 NA | NA | NA | NA | NA |
| Gm43286 | 0 NA | NA | NA | NA | NA |
| Gm43304 | 0 NA | NA | NA | NA | NA |
| Gm43308 | 0 NA | NA | NA | NA | NA |
| Gm43309 | 0 NA | NA | NA | NA | NA |
| Gm43310 | 0 NA | NA | NA | NA | NA |
| Gm43315 | 0 NA | NA | NA | NA | NA |
| Gm43324 | 0 NA | NA | NA | NA | NA |
| Gm43345 | 0 NA | NA | NA | NA | NA |
| Gm43347 | 0 NA | NA | NA | NA | NA |
| Gm43354 | 0 NA | NA | NA | NA | NA |
| Gm43355 | 0 NA | NA | NA | NA | NA |
| Gm43367 | 0 NA | NA | NA | NA | NA |
| Gm43368 | 0 NA | NA | NA | NA | NA |
| Gm43369 | 0 NA | NA | NA | NA | NA |
| Gm43370 | 0 NA | NA | NA | NA | NA |
| Gm43381 | 0 NA | NA | NA | NA | NA |
| Gm43382 | 0 NA | NA | NA | NA | NA |
| Gm43383 | 0 NA | NA | NA | NA | NA |
| Gm43390 | 0 NA | NA | NA | NA | NA |
| Gm43392 | 0 NA | NA | NA | NA | NA |
| Gm43393 | 0 NA | NA | NA | NA | NA |
| Gm43396 | 0 NA | NA | NA | NA | NA |
| Gm4340  | 0 NA | NA | NA | NA | NA |
| Gm43402 | 0 NA | NA | NA | NA | NA |
| Gm43405 | 0 NA | NA | NA | NA | NA |
| Gm43406 | 0 NA | NA | NA | NA | NA |
| Gm43407 | 0 NA | NA | NA | NA | NA |
| Gm43408 | 0 NA | NA | NA | NA | NA |
| Gm43424 | 0 NA | NA | NA | NA | NA |
| Gm43427 | 0 NA | NA | NA | NA | NA |
| Gm43431 | 0 NA | NA | NA | NA | NA |
| Gm43433 | 0 NA | NA | NA | NA | NA |
| Gm43436 | 0 NA | NA | NA | NA | NA |
| Gm43438 | 0 NA | NA | NA | NA | NA |
| Gm43440 | 0 NA | NA | NA | NA | NA |
| Gm43441 | 0 NA | NA | NA | NA | NA |
| Gm43456 | 0 NA | NA | NA | NA | NA |
| Gm43459 | 0 NA | NA | NA | NA | NA |
| Gm43467 | 0 NA | NA | NA | NA | NA |
| Gm43478 | 0 NA | NA | NA | NA | NA |
| Gm43491 | 0 NA | NA | NA | NA | NA |
| Gm43494 | 0 NA | NA | NA | NA | NA |
| Gm43501 | 0 NA | NA | NA | NA | NA |
| Gm43510 | 0 NA | NA | NA | NA | NA |
| Gm43512 | 0 NA | NA | NA | NA | NA |
| Gm43516 | 0 NA | NA | NA | NA | NA |
| Gm43524 | 0 NA | NA | NA | NA | NA |
| Gm43529 | 0 NA | NA | NA | NA | NA |
| Gm43530 | 0 NA | NA | NA | NA | NA |
| Gm43542 | 0 NA | NA | NA | NA | NA |
| Gm4355  | 0 NA | NA | NA | NA | NA |
| Gm43550 | 0 NA | NA | NA | NA | NA |
| Gm43551 | 0 NA | NA | NA | NA | NA |
| Gm43554 | 0 NA | NA | NA | NA | NA |
| Gm43555 | 0 NA | NA | NA | NA | NA |
| Gm43559 | 0 NA | NA | NA | NA | NA |
| Gm43561 | 0 NA | NA | NA | NA | NA |
| Gm43563 | 0 NA | NA | NA | NA | NA |
| Gm43575 | 0 NA | NA | NA | NA | NA |
| Gm43578 | 0 NA | NA | NA | NA | NA |
| Gm43583 | 0 NA | NA | NA | NA | NA |
| Gm43586 | 0 NA | NA | NA | NA | NA |
| Gm43595 | 0 NA | NA | NA | NA | NA |

|         |      |    |    |    |    |
|---------|------|----|----|----|----|
| Gm43600 | 0 NA | NA | NA | NA | NA |
| Gm43602 | 0 NA | NA | NA | NA | NA |
| Gm43624 | 0 NA | NA | NA | NA | NA |
| Gm43626 | 0 NA | NA | NA | NA | NA |
| Gm43629 | 0 NA | NA | NA | NA | NA |
| Gm43630 | 0 NA | NA | NA | NA | NA |
| Gm43631 | 0 NA | NA | NA | NA | NA |
| Gm43638 | 0 NA | NA | NA | NA | NA |
| Gm43649 | 0 NA | NA | NA | NA | NA |
| Gm43655 | 0 NA | NA | NA | NA | NA |
| Gm43656 | 0 NA | NA | NA | NA | NA |
| Gm43659 | 0 NA | NA | NA | NA | NA |
| Gm43669 | 0 NA | NA | NA | NA | NA |
| Gm43671 | 0 NA | NA | NA | NA | NA |
| Gm43675 | 0 NA | NA | NA | NA | NA |
| Gm43680 | 0 NA | NA | NA | NA | NA |
| Gm43704 | 0 NA | NA | NA | NA | NA |
| Gm43709 | 0 NA | NA | NA | NA | NA |
| Gm43710 | 0 NA | NA | NA | NA | NA |
| Gm43711 | 0 NA | NA | NA | NA | NA |
| Gm43717 | 0 NA | NA | NA | NA | NA |
| Gm43722 | 0 NA | NA | NA | NA | NA |
| Gm43723 | 0 NA | NA | NA | NA | NA |
| Gm43724 | 0 NA | NA | NA | NA | NA |
| Gm43725 | 0 NA | NA | NA | NA | NA |
| Gm43726 | 0 NA | NA | NA | NA | NA |
| Gm4373  | 0 NA | NA | NA | NA | NA |
| Gm43739 | 0 NA | NA | NA | NA | NA |
| Gm4374  | 0 NA | NA | NA | NA | NA |
| Gm43746 | 0 NA | NA | NA | NA | NA |
| Gm43749 | 0 NA | NA | NA | NA | NA |
| Gm43752 | 0 NA | NA | NA | NA | NA |
| Gm43767 | 0 NA | NA | NA | NA | NA |
| Gm43779 | 0 NA | NA | NA | NA | NA |
| Gm43812 | 0 NA | NA | NA | NA | NA |
| Gm43818 | 0 NA | NA | NA | NA | NA |
| Gm43827 | 0 NA | NA | NA | NA | NA |
| Gm43828 | 0 NA | NA | NA | NA | NA |
| Gm4383  | 0 NA | NA | NA | NA | NA |
| Gm43833 | 0 NA | NA | NA | NA | NA |
| Gm43840 | 0 NA | NA | NA | NA | NA |
| Gm43849 | 0 NA | NA | NA | NA | NA |
| Gm43850 | 0 NA | NA | NA | NA | NA |
| Gm43853 | 0 NA | NA | NA | NA | NA |
| Gm43854 | 0 NA | NA | NA | NA | NA |
| Gm43855 | 0 NA | NA | NA | NA | NA |
| Gm43865 | 0 NA | NA | NA | NA | NA |
| Gm43867 | 0 NA | NA | NA | NA | NA |
| Gm43892 | 0 NA | NA | NA | NA | NA |
| Gm43895 | 0 NA | NA | NA | NA | NA |
| Gm43897 | 0 NA | NA | NA | NA | NA |
| Gm43898 | 0 NA | NA | NA | NA | NA |
| Gm43899 | 0 NA | NA | NA | NA | NA |
| Gm43901 | 0 NA | NA | NA | NA | NA |
| Gm43905 | 0 NA | NA | NA | NA | NA |
| Gm43907 | 0 NA | NA | NA | NA | NA |
| Gm43911 | 0 NA | NA | NA | NA | NA |
| Gm43919 | 0 NA | NA | NA | NA | NA |
| Gm43922 | 0 NA | NA | NA | NA | NA |
| Gm43925 | 0 NA | NA | NA | NA | NA |
| Gm43926 | 0 NA | NA | NA | NA | NA |
| Gm43927 | 0 NA | NA | NA | NA | NA |
| Gm43928 | 0 NA | NA | NA | NA | NA |
| Gm43929 | 0 NA | NA | NA | NA | NA |
| Gm43932 | 0 NA | NA | NA | NA | NA |
| Gm43933 | 0 NA | NA | NA | NA | NA |

|         |      |    |    |    |    |
|---------|------|----|----|----|----|
| Gm43934 | 0 NA | NA | NA | NA | NA |
| Gm43943 | 0 NA | NA | NA | NA | NA |
| Gm43944 | 0 NA | NA | NA | NA | NA |
| Gm43945 | 0 NA | NA | NA | NA | NA |
| Gm43954 | 0 NA | NA | NA | NA | NA |
| Gm43955 | 0 NA | NA | NA | NA | NA |
| Gm43957 | 0 NA | NA | NA | NA | NA |
| Gm43959 | 0 NA | NA | NA | NA | NA |
| Gm43962 | 0 NA | NA | NA | NA | NA |
| Gm43967 | 0 NA | NA | NA | NA | NA |
| Gm43968 | 0 NA | NA | NA | NA | NA |
| Gm43973 | 0 NA | NA | NA | NA | NA |
| Gm43975 | 0 NA | NA | NA | NA | NA |
| Gm43976 | 0 NA | NA | NA | NA | NA |
| Gm43977 | 0 NA | NA | NA | NA | NA |
| Gm43978 | 0 NA | NA | NA | NA | NA |
| Gm43979 | 0 NA | NA | NA | NA | NA |
| Gm4398  | 0 NA | NA | NA | NA | NA |
| Gm43985 | 0 NA | NA | NA | NA | NA |
| Gm43988 | 0 NA | NA | NA | NA | NA |
| Gm43991 | 0 NA | NA | NA | NA | NA |
| Gm43993 | 0 NA | NA | NA | NA | NA |
| Gm44    | 0 NA | NA | NA | NA | NA |
| Gm44003 | 0 NA | NA | NA | NA | NA |
| Gm44011 | 0 NA | NA | NA | NA | NA |
| Gm44016 | 0 NA | NA | NA | NA | NA |
| Gm44018 | 0 NA | NA | NA | NA | NA |
| Gm44023 | 0 NA | NA | NA | NA | NA |
| Gm44030 | 0 NA | NA | NA | NA | NA |
| Gm44032 | 0 NA | NA | NA | NA | NA |
| Gm44034 | 0 NA | NA | NA | NA | NA |
| Gm44038 | 0 NA | NA | NA | NA | NA |
| Gm44048 | 0 NA | NA | NA | NA | NA |
| Gm44050 | 0 NA | NA | NA | NA | NA |
| Gm44052 | 0 NA | NA | NA | NA | NA |
| Gm44054 | 0 NA | NA | NA | NA | NA |
| Gm44055 | 0 NA | NA | NA | NA | NA |
| Gm44057 | 0 NA | NA | NA | NA | NA |
| Gm44058 | 0 NA | NA | NA | NA | NA |
| Gm44059 | 0 NA | NA | NA | NA | NA |
| Gm44061 | 0 NA | NA | NA | NA | NA |
| Gm44063 | 0 NA | NA | NA | NA | NA |
| Gm44074 | 0 NA | NA | NA | NA | NA |
| Gm44075 | 0 NA | NA | NA | NA | NA |
| Gm44076 | 0 NA | NA | NA | NA | NA |
| Gm44088 | 0 NA | NA | NA | NA | NA |
| Gm44092 | 0 NA | NA | NA | NA | NA |
| Gm44098 | 0 NA | NA | NA | NA | NA |
| Gm44099 | 0 NA | NA | NA | NA | NA |
| Gm4410  | 0 NA | NA | NA | NA | NA |
| Gm44100 | 0 NA | NA | NA | NA | NA |
| Gm44108 | 0 NA | NA | NA | NA | NA |
| Gm44111 | 0 NA | NA | NA | NA | NA |
| Gm44112 | 0 NA | NA | NA | NA | NA |
| Gm44118 | 0 NA | NA | NA | NA | NA |
| Gm4412  | 0 NA | NA | NA | NA | NA |
| Gm44125 | 0 NA | NA | NA | NA | NA |
| Gm44128 | 0 NA | NA | NA | NA | NA |
| Gm44131 | 0 NA | NA | NA | NA | NA |
| Gm44132 | 0 NA | NA | NA | NA | NA |
| Gm44133 | 0 NA | NA | NA | NA | NA |
| Gm44134 | 0 NA | NA | NA | NA | NA |
| Gm44137 | 0 NA | NA | NA | NA | NA |
| Gm44138 | 0 NA | NA | NA | NA | NA |
| Gm44139 | 0 NA | NA | NA | NA | NA |
| Gm44147 | 0 NA | NA | NA | NA | NA |



|         |      |    |    |    |    |
|---------|------|----|----|----|----|
| Gm44149 | 0 NA | NA | NA | NA | NA |
| Gm44158 | 0 NA | NA | NA | NA | NA |
| Gm44159 | 0 NA | NA | NA | NA | NA |
| Gm44161 | 0 NA | NA | NA | NA | NA |
| Gm44162 | 0 NA | NA | NA | NA | NA |
| Gm44163 | 0 NA | NA | NA | NA | NA |
| Gm44173 | 0 NA | NA | NA | NA | NA |
| Gm44182 | 0 NA | NA | NA | NA | NA |
| Gm44208 | 0 NA | NA | NA | NA | NA |
| Gm44211 | 0 NA | NA | NA | NA | NA |
| Gm44213 | 0 NA | NA | NA | NA | NA |
| Gm44216 | 0 NA | NA | NA | NA | NA |
| Gm44219 | 0 NA | NA | NA | NA | NA |
| Gm44221 | 0 NA | NA | NA | NA | NA |
| Gm44223 | 0 NA | NA | NA | NA | NA |
| Gm44225 | 0 NA | NA | NA | NA | NA |
| Gm44227 | 0 NA | NA | NA | NA | NA |
| Gm44232 | 0 NA | NA | NA | NA | NA |
| Gm44233 | 0 NA | NA | NA | NA | NA |
| Gm44239 | 0 NA | NA | NA | NA | NA |
| Gm44251 | 0 NA | NA | NA | NA | NA |
| Gm44252 | 0 NA | NA | NA | NA | NA |
| Gm44259 | 0 NA | NA | NA | NA | NA |
| Gm44261 | 0 NA | NA | NA | NA | NA |
| Gm44262 | 0 NA | NA | NA | NA | NA |
| Gm44277 | 0 NA | NA | NA | NA | NA |
| Gm44279 | 0 NA | NA | NA | NA | NA |
| Gm44281 | 0 NA | NA | NA | NA | NA |
| Gm44282 | 0 NA | NA | NA | NA | NA |
| Gm44285 | 0 NA | NA | NA | NA | NA |
| Gm44289 | 0 NA | NA | NA | NA | NA |
| Gm44306 | 0 NA | NA | NA | NA | NA |
| Gm44307 | 0 NA | NA | NA | NA | NA |
| Gm44312 | 0 NA | NA | NA | NA | NA |
| Gm44315 | 0 NA | NA | NA | NA | NA |
| Gm4432  | 0 NA | NA | NA | NA | NA |
| Gm44389 | 0 NA | NA | NA | NA | NA |
| Gm44399 | 0 NA | NA | NA | NA | NA |
| Gm44402 | 0 NA | NA | NA | NA | NA |
| Gm44404 | 0 NA | NA | NA | NA | NA |
| Gm44412 | 0 NA | NA | NA | NA | NA |
| Gm44419 | 0 NA | NA | NA | NA | NA |
| Gm44420 | 0 NA | NA | NA | NA | NA |
| Gm44422 | 0 NA | NA | NA | NA | NA |
| Gm44425 | 0 NA | NA | NA | NA | NA |
| Gm44426 | 0 NA | NA | NA | NA | NA |
| Gm44446 | 0 NA | NA | NA | NA | NA |
| Gm44449 | 0 NA | NA | NA | NA | NA |
| Gm44451 | 0 NA | NA | NA | NA | NA |
| Gm44459 | 0 NA | NA | NA | NA | NA |
| Gm44470 | 0 NA | NA | NA | NA | NA |
| Gm44473 | 0 NA | NA | NA | NA | NA |
| Gm44475 | 0 NA | NA | NA | NA | NA |
| Gm44501 | 0 NA | NA | NA | NA | NA |
| Gm4451  | 0 NA | NA | NA | NA | NA |
| Gm44519 | 0 NA | NA | NA | NA | NA |
| Gm44521 | 0 NA | NA | NA | NA | NA |
| Gm44523 | 0 NA | NA | NA | NA | NA |
| Gm44525 | 0 NA | NA | NA | NA | NA |
| Gm44526 | 0 NA | NA | NA | NA | NA |
| Gm44527 | 0 NA | NA | NA | NA | NA |
| Gm44533 | 0 NA | NA | NA | NA | NA |
| Gm44538 | 0 NA | NA | NA | NA | NA |
| Gm44539 | 0 NA | NA | NA | NA | NA |
| Gm4454  | 0 NA | NA | NA | NA | NA |
| Gm44540 | 0 NA | NA | NA | NA | NA |

|         |      |    |    |    |    |
|---------|------|----|----|----|----|
| Gm44543 | 0 NA | NA | NA | NA | NA |
| Gm44544 | 0 NA | NA | NA | NA | NA |
| Gm44548 | 0 NA | NA | NA | NA | NA |
| Gm44551 | 0 NA | NA | NA | NA | NA |
| Gm44554 | 0 NA | NA | NA | NA | NA |
| Gm44555 | 0 NA | NA | NA | NA | NA |
| Gm44561 | 0 NA | NA | NA | NA | NA |
| Gm44563 | 0 NA | NA | NA | NA | NA |
| Gm44564 | 0 NA | NA | NA | NA | NA |
| Gm44565 | 0 NA | NA | NA | NA | NA |
| Gm44566 | 0 NA | NA | NA | NA | NA |
| Gm44571 | 0 NA | NA | NA | NA | NA |
| Gm44575 | 0 NA | NA | NA | NA | NA |
| Gm44579 | 0 NA | NA | NA | NA | NA |
| Gm44580 | 0 NA | NA | NA | NA | NA |
| Gm44582 | 0 NA | NA | NA | NA | NA |
| Gm44583 | 0 NA | NA | NA | NA | NA |
| Gm44589 | 0 NA | NA | NA | NA | NA |
| Gm4459  | 0 NA | NA | NA | NA | NA |
| Gm44590 | 0 NA | NA | NA | NA | NA |
| Gm44594 | 0 NA | NA | NA | NA | NA |
| Gm44596 | 0 NA | NA | NA | NA | NA |
| Gm44598 | 0 NA | NA | NA | NA | NA |
| Gm44600 | 0 NA | NA | NA | NA | NA |
| Gm44602 | 0 NA | NA | NA | NA | NA |
| Gm44603 | 0 NA | NA | NA | NA | NA |
| Gm44604 | 0 NA | NA | NA | NA | NA |
| Gm44605 | 0 NA | NA | NA | NA | NA |
| Gm44611 | 0 NA | NA | NA | NA | NA |
| Gm44615 | 0 NA | NA | NA | NA | NA |
| Gm44634 | 0 NA | NA | NA | NA | NA |
| Gm44638 | 0 NA | NA | NA | NA | NA |
| Gm44640 | 0 NA | NA | NA | NA | NA |
| Gm44648 | 0 NA | NA | NA | NA | NA |
| Gm44650 | 0 NA | NA | NA | NA | NA |
| Gm44654 | 0 NA | NA | NA | NA | NA |
| Gm44655 | 0 NA | NA | NA | NA | NA |
| Gm44656 | 0 NA | NA | NA | NA | NA |
| Gm44657 | 0 NA | NA | NA | NA | NA |
| Gm44665 | 0 NA | NA | NA | NA | NA |
| Gm44666 | 0 NA | NA | NA | NA | NA |
| Gm44683 | 0 NA | NA | NA | NA | NA |
| Gm44687 | 0 NA | NA | NA | NA | NA |
| Gm44690 | 0 NA | NA | NA | NA | NA |
| Gm44703 | 0 NA | NA | NA | NA | NA |
| Gm44705 | 0 NA | NA | NA | NA | NA |
| Gm44713 | 0 NA | NA | NA | NA | NA |
| Gm44720 | 0 NA | NA | NA | NA | NA |
| Gm44726 | 0 NA | NA | NA | NA | NA |
| Gm44727 | 0 NA | NA | NA | NA | NA |
| Gm44743 | 0 NA | NA | NA | NA | NA |
| Gm44754 | 0 NA | NA | NA | NA | NA |
| Gm44768 | 0 NA | NA | NA | NA | NA |
| Gm44779 | 0 NA | NA | NA | NA | NA |
| Gm4478  | 0 NA | NA | NA | NA | NA |
| Gm44782 | 0 NA | NA | NA | NA | NA |
| Gm4479  | 0 NA | NA | NA | NA | NA |
| Gm44795 | 0 NA | NA | NA | NA | NA |
| Gm44803 | 0 NA | NA | NA | NA | NA |
| Gm44807 | 0 NA | NA | NA | NA | NA |
| Gm44820 | 0 NA | NA | NA | NA | NA |
| Gm44823 | 0 NA | NA | NA | NA | NA |
| Gm44824 | 0 NA | NA | NA | NA | NA |
| Gm44825 | 0 NA | NA | NA | NA | NA |
| Gm44828 | 0 NA | NA | NA | NA | NA |
| Gm44833 | 0 NA | NA | NA | NA | NA |

|         |      |    |    |    |    |
|---------|------|----|----|----|----|
| Gm44844 | 0 NA | NA | NA | NA | NA |
| Gm44849 | 0 NA | NA | NA | NA | NA |
| Gm44852 | 0 NA | NA | NA | NA | NA |
| Gm44853 | 0 NA | NA | NA | NA | NA |
| Gm44856 | 0 NA | NA | NA | NA | NA |
| Gm44857 | 0 NA | NA | NA | NA | NA |
| Gm44858 | 0 NA | NA | NA | NA | NA |
| Gm44859 | 0 NA | NA | NA | NA | NA |
| Gm4486  | 0 NA | NA | NA | NA | NA |
| Gm44865 | 0 NA | NA | NA | NA | NA |
| Gm44869 | 0 NA | NA | NA | NA | NA |
| Gm4487  | 0 NA | NA | NA | NA | NA |
| Gm44870 | 0 NA | NA | NA | NA | NA |
| Gm44871 | 0 NA | NA | NA | NA | NA |
| Gm44872 | 0 NA | NA | NA | NA | NA |
| Gm44879 | 0 NA | NA | NA | NA | NA |
| Gm44881 | 0 NA | NA | NA | NA | NA |
| Gm44887 | 0 NA | NA | NA | NA | NA |
| Gm44902 | 0 NA | NA | NA | NA | NA |
| Gm44903 | 0 NA | NA | NA | NA | NA |
| Gm44908 | 0 NA | NA | NA | NA | NA |
| Gm44909 | 0 NA | NA | NA | NA | NA |
| Gm4491  | 0 NA | NA | NA | NA | NA |
| Gm44910 | 0 NA | NA | NA | NA | NA |
| Gm44921 | 0 NA | NA | NA | NA | NA |
| Gm44922 | 0 NA | NA | NA | NA | NA |
| Gm44923 | 0 NA | NA | NA | NA | NA |
| Gm44932 | 0 NA | NA | NA | NA | NA |
| Gm44938 | 0 NA | NA | NA | NA | NA |
| Gm44943 | 0 NA | NA | NA | NA | NA |
| Gm44945 | 0 NA | NA | NA | NA | NA |
| Gm44959 | 0 NA | NA | NA | NA | NA |
| Gm44960 | 0 NA | NA | NA | NA | NA |
| Gm44961 | 0 NA | NA | NA | NA | NA |
| Gm44962 | 0 NA | NA | NA | NA | NA |
| Gm44972 | 0 NA | NA | NA | NA | NA |
| Gm44977 | 0 NA | NA | NA | NA | NA |
| Gm44978 | 0 NA | NA | NA | NA | NA |
| Gm44979 | 0 NA | NA | NA | NA | NA |
| Gm44980 | 0 NA | NA | NA | NA | NA |
| Gm44988 | 0 NA | NA | NA | NA | NA |
| Gm44989 | 0 NA | NA | NA | NA | NA |
| Gm44990 | 0 NA | NA | NA | NA | NA |
| Gm45002 | 0 NA | NA | NA | NA | NA |
| Gm45007 | 0 NA | NA | NA | NA | NA |
| Gm4501  | 0 NA | NA | NA | NA | NA |
| Gm45013 | 0 NA | NA | NA | NA | NA |
| Gm45021 | 0 NA | NA | NA | NA | NA |
| Gm45023 | 0 NA | NA | NA | NA | NA |
| Gm45026 | 0 NA | NA | NA | NA | NA |
| Gm45031 | 0 NA | NA | NA | NA | NA |
| Gm45032 | 0 NA | NA | NA | NA | NA |
| Gm45034 | 0 NA | NA | NA | NA | NA |
| Gm45048 | 0 NA | NA | NA | NA | NA |
| Gm45049 | 0 NA | NA | NA | NA | NA |
| Gm45063 | 0 NA | NA | NA | NA | NA |
| Gm45070 | 0 NA | NA | NA | NA | NA |
| Gm45071 | 0 NA | NA | NA | NA | NA |
| Gm45078 | 0 NA | NA | NA | NA | NA |
| Gm45085 | 0 NA | NA | NA | NA | NA |
| Gm45100 | 0 NA | NA | NA | NA | NA |
| Gm45101 | 0 NA | NA | NA | NA | NA |
| Gm45113 | 0 NA | NA | NA | NA | NA |
| Gm45115 | 0 NA | NA | NA | NA | NA |
| Gm45116 | 0 NA | NA | NA | NA | NA |
| Gm45118 | 0 NA | NA | NA | NA | NA |

|         |      |    |    |    |    |
|---------|------|----|----|----|----|
| Gm45119 | 0 NA | NA | NA | NA | NA |
| Gm45122 | 0 NA | NA | NA | NA | NA |
| Gm45125 | 0 NA | NA | NA | NA | NA |
| Gm45126 | 0 NA | NA | NA | NA | NA |
| Gm45127 | 0 NA | NA | NA | NA | NA |
| Gm45134 | 0 NA | NA | NA | NA | NA |
| Gm45135 | 0 NA | NA | NA | NA | NA |
| Gm45146 | 0 NA | NA | NA | NA | NA |
| Gm45150 | 0 NA | NA | NA | NA | NA |
| Gm45156 | 0 NA | NA | NA | NA | NA |
| Gm45157 | 0 NA | NA | NA | NA | NA |
| Gm45162 | 0 NA | NA | NA | NA | NA |
| Gm45171 | 0 NA | NA | NA | NA | NA |
| Gm45173 | 0 NA | NA | NA | NA | NA |
| Gm45186 | 0 NA | NA | NA | NA | NA |
| Gm45189 | 0 NA | NA | NA | NA | NA |
| Gm45192 | 0 NA | NA | NA | NA | NA |
| Gm45194 | 0 NA | NA | NA | NA | NA |
| Gm45195 | 0 NA | NA | NA | NA | NA |
| Gm45196 | 0 NA | NA | NA | NA | NA |
| Gm45197 | 0 NA | NA | NA | NA | NA |
| Gm45198 | 0 NA | NA | NA | NA | NA |
| Gm45207 | 0 NA | NA | NA | NA | NA |
| Gm45209 | 0 NA | NA | NA | NA | NA |
| Gm45215 | 0 NA | NA | NA | NA | NA |
| Gm45219 | 0 NA | NA | NA | NA | NA |
| Gm45226 | 0 NA | NA | NA | NA | NA |
| Gm45227 | 0 NA | NA | NA | NA | NA |
| Gm45228 | 0 NA | NA | NA | NA | NA |
| Gm45232 | 0 NA | NA | NA | NA | NA |
| Gm45245 | 0 NA | NA | NA | NA | NA |
| Gm45247 | 0 NA | NA | NA | NA | NA |
| Gm4525  | 0 NA | NA | NA | NA | NA |
| Gm45252 | 0 NA | NA | NA | NA | NA |
| Gm45261 | 0 NA | NA | NA | NA | NA |
| Gm45273 | 0 NA | NA | NA | NA | NA |
| Gm45275 | 0 NA | NA | NA | NA | NA |
| Gm45279 | 0 NA | NA | NA | NA | NA |
| Gm4528  | 0 NA | NA | NA | NA | NA |
| Gm45283 | 0 NA | NA | NA | NA | NA |
| Gm45288 | 0 NA | NA | NA | NA | NA |
| Gm4529  | 0 NA | NA | NA | NA | NA |
| Gm45296 | 0 NA | NA | NA | NA | NA |
| Gm45312 | 0 NA | NA | NA | NA | NA |
| Gm45313 | 0 NA | NA | NA | NA | NA |
| Gm45315 | 0 NA | NA | NA | NA | NA |
| Gm45316 | 0 NA | NA | NA | NA | NA |
| Gm45317 | 0 NA | NA | NA | NA | NA |
| Gm45327 | 0 NA | NA | NA | NA | NA |
| Gm45331 | 0 NA | NA | NA | NA | NA |
| Gm45337 | 0 NA | NA | NA | NA | NA |
| Gm4535  | 0 NA | NA | NA | NA | NA |
| Gm4536  | 0 NA | NA | NA | NA | NA |
| Gm45364 | 0 NA | NA | NA | NA | NA |
| Gm45365 | 0 NA | NA | NA | NA | NA |
| Gm45366 | 0 NA | NA | NA | NA | NA |
| Gm45367 | 0 NA | NA | NA | NA | NA |
| Gm45374 | 0 NA | NA | NA | NA | NA |
| Gm45375 | 0 NA | NA | NA | NA | NA |
| Gm45382 | 0 NA | NA | NA | NA | NA |
| Gm45386 | 0 NA | NA | NA | NA | NA |
| Gm45387 | 0 NA | NA | NA | NA | NA |
| Gm45392 | 0 NA | NA | NA | NA | NA |
| Gm45395 | 0 NA | NA | NA | NA | NA |
| Gm45398 | 0 NA | NA | NA | NA | NA |
| Gm4540  | 0 NA | NA | NA | NA | NA |

|         |      |    |    |    |    |
|---------|------|----|----|----|----|
| Gm45400 | 0 NA | NA | NA | NA | NA |
| Gm45401 | 0 NA | NA | NA | NA | NA |
| Gm45402 | 0 NA | NA | NA | NA | NA |
| Gm45405 | 0 NA | NA | NA | NA | NA |
| Gm45409 | 0 NA | NA | NA | NA | NA |
| Gm4541  | 0 NA | NA | NA | NA | NA |
| Gm45417 | 0 NA | NA | NA | NA | NA |
| Gm45420 | 0 NA | NA | NA | NA | NA |
| Gm45422 | 0 NA | NA | NA | NA | NA |
| Gm45429 | 0 NA | NA | NA | NA | NA |
| Gm45433 | 0 NA | NA | NA | NA | NA |
| Gm45434 | 0 NA | NA | NA | NA | NA |
| Gm45438 | 0 NA | NA | NA | NA | NA |
| Gm45439 | 0 NA | NA | NA | NA | NA |
| Gm45445 | 0 NA | NA | NA | NA | NA |
| Gm45446 | 0 NA | NA | NA | NA | NA |
| Gm45448 | 0 NA | NA | NA | NA | NA |
| Gm4545  | 0 NA | NA | NA | NA | NA |
| Gm45452 | 0 NA | NA | NA | NA | NA |
| Gm45456 | 0 NA | NA | NA | NA | NA |
| Gm45473 | 0 NA | NA | NA | NA | NA |
| Gm45475 | 0 NA | NA | NA | NA | NA |
| Gm45478 | 0 NA | NA | NA | NA | NA |
| Gm45485 | 0 NA | NA | NA | NA | NA |
| Gm45497 | 0 NA | NA | NA | NA | NA |
| Gm45498 | 0 NA | NA | NA | NA | NA |
| Gm45500 | 0 NA | NA | NA | NA | NA |
| Gm45506 | 0 NA | NA | NA | NA | NA |
| Gm45513 | 0 NA | NA | NA | NA | NA |
| Gm45514 | 0 NA | NA | NA | NA | NA |
| Gm45521 | 0 NA | NA | NA | NA | NA |
| Gm45523 | 0 NA | NA | NA | NA | NA |
| Gm45525 | 0 NA | NA | NA | NA | NA |
| Gm4553  | 0 NA | NA | NA | NA | NA |
| Gm45530 | 0 NA | NA | NA | NA | NA |
| Gm45539 | 0 NA | NA | NA | NA | NA |
| Gm45541 | 0 NA | NA | NA | NA | NA |
| Gm45543 | 0 NA | NA | NA | NA | NA |
| Gm45544 | 0 NA | NA | NA | NA | NA |
| Gm45549 | 0 NA | NA | NA | NA | NA |
| Gm45550 | 0 NA | NA | NA | NA | NA |
| Gm4556  | 0 NA | NA | NA | NA | NA |
| Gm45562 | 0 NA | NA | NA | NA | NA |
| Gm45566 | 0 NA | NA | NA | NA | NA |
| Gm4557  | 0 NA | NA | NA | NA | NA |
| Gm45575 | 0 NA | NA | NA | NA | NA |
| Gm4558  | 0 NA | NA | NA | NA | NA |
| Gm4559  | 0 NA | NA | NA | NA | NA |
| Gm45590 | 0 NA | NA | NA | NA | NA |
| Gm45596 | 0 NA | NA | NA | NA | NA |
| Gm45608 | 0 NA | NA | NA | NA | NA |
| Gm45610 | 0 NA | NA | NA | NA | NA |
| Gm45612 | 0 NA | NA | NA | NA | NA |
| Gm45614 | 0 NA | NA | NA | NA | NA |
| Gm45616 | 0 NA | NA | NA | NA | NA |
| Gm45617 | 0 NA | NA | NA | NA | NA |
| Gm45618 | 0 NA | NA | NA | NA | NA |
| Gm45623 | 0 NA | NA | NA | NA | NA |
| Gm45626 | 0 NA | NA | NA | NA | NA |
| Gm45628 | 0 NA | NA | NA | NA | NA |
| Gm45651 | 0 NA | NA | NA | NA | NA |
| Gm45654 | 0 NA | NA | NA | NA | NA |
| Gm45655 | 0 NA | NA | NA | NA | NA |
| Gm45658 | 0 NA | NA | NA | NA | NA |
| Gm45660 | 0 NA | NA | NA | NA | NA |
| Gm45668 | 0 NA | NA | NA | NA | NA |

|         |      |    |    |    |    |
|---------|------|----|----|----|----|
| Gm45673 | 0 NA | NA | NA | NA | NA |
| Gm45678 | 0 NA | NA | NA | NA | NA |
| Gm45687 | 0 NA | NA | NA | NA | NA |
| Gm45688 | 0 NA | NA | NA | NA | NA |
| Gm45689 | 0 NA | NA | NA | NA | NA |
| Gm45690 | 0 NA | NA | NA | NA | NA |
| Gm45701 | 0 NA | NA | NA | NA | NA |
| Gm45704 | 0 NA | NA | NA | NA | NA |
| Gm45710 | 0 NA | NA | NA | NA | NA |
| Gm45711 | 0 NA | NA | NA | NA | NA |
| Gm45712 | 0 NA | NA | NA | NA | NA |
| Gm45722 | 0 NA | NA | NA | NA | NA |
| Gm45725 | 0 NA | NA | NA | NA | NA |
| Gm4573  | 0 NA | NA | NA | NA | NA |
| Gm45730 | 0 NA | NA | NA | NA | NA |
| Gm45734 | 0 NA | NA | NA | NA | NA |
| Gm45735 | 0 NA | NA | NA | NA | NA |
| Gm4574  | 0 NA | NA | NA | NA | NA |
| Gm45742 | 0 NA | NA | NA | NA | NA |
| Gm45754 | 0 NA | NA | NA | NA | NA |
| Gm45770 | 0 NA | NA | NA | NA | NA |
| Gm45772 | 0 NA | NA | NA | NA | NA |
| Gm45778 | 0 NA | NA | NA | NA | NA |
| Gm45780 | 0 NA | NA | NA | NA | NA |
| Gm45782 | 0 NA | NA | NA | NA | NA |
| Gm45783 | 0 NA | NA | NA | NA | NA |
| Gm45784 | 0 NA | NA | NA | NA | NA |
| Gm45789 | 0 NA | NA | NA | NA | NA |
| Gm45791 | 0 NA | NA | NA | NA | NA |
| Gm45796 | 0 NA | NA | NA | NA | NA |
| Gm45814 | 0 NA | NA | NA | NA | NA |
| Gm45815 | 0 NA | NA | NA | NA | NA |
| Gm45826 | 0 NA | NA | NA | NA | NA |
| Gm4585  | 0 NA | NA | NA | NA | NA |
| Gm45850 | 0 NA | NA | NA | NA | NA |
| Gm45856 | 0 NA | NA | NA | NA | NA |
| Gm45859 | 0 NA | NA | NA | NA | NA |
| Gm45861 | 0 NA | NA | NA | NA | NA |
| Gm4587  | 0 NA | NA | NA | NA | NA |
| Gm45870 | 0 NA | NA | NA | NA | NA |
| Gm45878 | 0 NA | NA | NA | NA | NA |
| Gm45907 | 0 NA | NA | NA | NA | NA |
| Gm45930 | 0 NA | NA | NA | NA | NA |
| Gm4602  | 0 NA | NA | NA | NA | NA |
| Gm4605  | 0 NA | NA | NA | NA | NA |
| Gm4607  | 0 NA | NA | NA | NA | NA |
| Gm46103 | 0 NA | NA | NA | NA | NA |
| Gm46138 | 0 NA | NA | NA | NA | NA |
| Gm46142 | 0 NA | NA | NA | NA | NA |
| Gm46146 | 0 NA | NA | NA | NA | NA |
| Gm46188 | 0 NA | NA | NA | NA | NA |
| Gm46190 | 0 NA | NA | NA | NA | NA |
| Gm46191 | 0 NA | NA | NA | NA | NA |
| Gm46192 | 0 NA | NA | NA | NA | NA |
| Gm46197 | 0 NA | NA | NA | NA | NA |
| Gm46199 | 0 NA | NA | NA | NA | NA |
| Gm46203 | 0 NA | NA | NA | NA | NA |
| Gm46231 | 0 NA | NA | NA | NA | NA |
| Gm46233 | 0 NA | NA | NA | NA | NA |
| Gm46234 | 0 NA | NA | NA | NA | NA |
| Gm46311 | 0 NA | NA | NA | NA | NA |
| Gm46312 | 0 NA | NA | NA | NA | NA |
| Gm46313 | 0 NA | NA | NA | NA | NA |
| Gm46317 | 0 NA | NA | NA | NA | NA |
| Gm46327 | 0 NA | NA | NA | NA | NA |
| Gm46338 | 0 NA | NA | NA | NA | NA |

|         |      |    |    |    |    |
|---------|------|----|----|----|----|
| Gm46342 | 0 NA | NA | NA | NA | NA |
| Gm46364 | 0 NA | NA | NA | NA | NA |
| Gm46379 | 0 NA | NA | NA | NA | NA |
| Gm46387 | 0 NA | NA | NA | NA | NA |
| Gm46388 | 0 NA | NA | NA | NA | NA |
| Gm46389 | 0 NA | NA | NA | NA | NA |
| Gm46391 | 0 NA | NA | NA | NA | NA |
| Gm46396 | 0 NA | NA | NA | NA | NA |
| Gm46415 | 0 NA | NA | NA | NA | NA |
| Gm46424 | 0 NA | NA | NA | NA | NA |
| Gm46427 | 0 NA | NA | NA | NA | NA |
| Gm46432 | 0 NA | NA | NA | NA | NA |
| Gm4644  | 0 NA | NA | NA | NA | NA |
| Gm46443 | 0 NA | NA | NA | NA | NA |
| Gm46448 | 0 NA | NA | NA | NA | NA |
| Gm46453 | 0 NA | NA | NA | NA | NA |
| Gm46455 | 0 NA | NA | NA | NA | NA |
| Gm46474 | 0 NA | NA | NA | NA | NA |
| Gm46475 | 0 NA | NA | NA | NA | NA |
| Gm46476 | 0 NA | NA | NA | NA | NA |
| Gm46477 | 0 NA | NA | NA | NA | NA |
| Gm46495 | 0 NA | NA | NA | NA | NA |
| Gm46496 | 0 NA | NA | NA | NA | NA |
| Gm46497 | 0 NA | NA | NA | NA | NA |
| Gm46498 | 0 NA | NA | NA | NA | NA |
| Gm46499 | 0 NA | NA | NA | NA | NA |
| Gm46506 | 0 NA | NA | NA | NA | NA |
| Gm46507 | 0 NA | NA | NA | NA | NA |
| Gm46524 | 0 NA | NA | NA | NA | NA |
| Gm46525 | 0 NA | NA | NA | NA | NA |
| Gm4660  | 0 NA | NA | NA | NA | NA |
| Gm46649 | 0 NA | NA | NA | NA | NA |
| Gm46992 | 0 NA | NA | NA | NA | NA |
| Gm46993 | 0 NA | NA | NA | NA | NA |
| Gm46994 | 0 NA | NA | NA | NA | NA |
| Gm46995 | 0 NA | NA | NA | NA | NA |
| Gm46996 | 0 NA | NA | NA | NA | NA |
| Gm46997 | 0 NA | NA | NA | NA | NA |
| Gm46998 | 0 NA | NA | NA | NA | NA |
| Gm47005 | 0 NA | NA | NA | NA | NA |
| Gm47008 | 0 NA | NA | NA | NA | NA |
| Gm47010 | 0 NA | NA | NA | NA | NA |
| Gm47012 | 0 NA | NA | NA | NA | NA |
| Gm47014 | 0 NA | NA | NA | NA | NA |
| Gm47019 | 0 NA | NA | NA | NA | NA |
| Gm47021 | 0 NA | NA | NA | NA | NA |
| Gm47029 | 0 NA | NA | NA | NA | NA |
| Gm47035 | 0 NA | NA | NA | NA | NA |
| Gm47038 | 0 NA | NA | NA | NA | NA |
| Gm47042 | 0 NA | NA | NA | NA | NA |
| Gm47044 | 0 NA | NA | NA | NA | NA |
| Gm47045 | 0 NA | NA | NA | NA | NA |
| Gm47046 | 0 NA | NA | NA | NA | NA |
| Gm47048 | 0 NA | NA | NA | NA | NA |
| Gm4705  | 0 NA | NA | NA | NA | NA |
| Gm47053 | 0 NA | NA | NA | NA | NA |
| Gm47055 | 0 NA | NA | NA | NA | NA |
| Gm47057 | 0 NA | NA | NA | NA | NA |
| Gm47058 | 0 NA | NA | NA | NA | NA |
| Gm47060 | 0 NA | NA | NA | NA | NA |
| Gm47062 | 0 NA | NA | NA | NA | NA |
| Gm47072 | 0 NA | NA | NA | NA | NA |
| Gm47074 | 0 NA | NA | NA | NA | NA |
| Gm47081 | 0 NA | NA | NA | NA | NA |
| Gm47083 | 0 NA | NA | NA | NA | NA |
| Gm47084 | 0 NA | NA | NA | NA | NA |

|         |      |    |    |    |    |
|---------|------|----|----|----|----|
| Gm47090 | 0 NA | NA | NA | NA | NA |
| Gm47091 | 0 NA | NA | NA | NA | NA |
| Gm47094 | 0 NA | NA | NA | NA | NA |
| Gm47098 | 0 NA | NA | NA | NA | NA |
| Gm47099 | 0 NA | NA | NA | NA | NA |
| Gm47100 | 0 NA | NA | NA | NA | NA |
| Gm47104 | 0 NA | NA | NA | NA | NA |
| Gm47105 | 0 NA | NA | NA | NA | NA |
| Gm47110 | 0 NA | NA | NA | NA | NA |
| Gm47114 | 0 NA | NA | NA | NA | NA |
| Gm47115 | 0 NA | NA | NA | NA | NA |
| Gm47120 | 0 NA | NA | NA | NA | NA |
| Gm47124 | 0 NA | NA | NA | NA | NA |
| Gm47125 | 0 NA | NA | NA | NA | NA |
| Gm47129 | 0 NA | NA | NA | NA | NA |
| Gm47130 | 0 NA | NA | NA | NA | NA |
| Gm47137 | 0 NA | NA | NA | NA | NA |
| Gm47142 | 0 NA | NA | NA | NA | NA |
| Gm47146 | 0 NA | NA | NA | NA | NA |
| Gm47149 | 0 NA | NA | NA | NA | NA |
| Gm47154 | 0 NA | NA | NA | NA | NA |
| Gm47158 | 0 NA | NA | NA | NA | NA |
| Gm47165 | 0 NA | NA | NA | NA | NA |
| Gm47168 | 0 NA | NA | NA | NA | NA |
| Gm47169 | 0 NA | NA | NA | NA | NA |
| Gm47170 | 0 NA | NA | NA | NA | NA |
| Gm47172 | 0 NA | NA | NA | NA | NA |
| Gm47178 | 0 NA | NA | NA | NA | NA |
| Gm47180 | 0 NA | NA | NA | NA | NA |
| Gm47182 | 0 NA | NA | NA | NA | NA |
| Gm47184 | 0 NA | NA | NA | NA | NA |
| Gm47185 | 0 NA | NA | NA | NA | NA |
| Gm47187 | 0 NA | NA | NA | NA | NA |
| Gm47189 | 0 NA | NA | NA | NA | NA |
| Gm47190 | 0 NA | NA | NA | NA | NA |
| Gm47192 | 0 NA | NA | NA | NA | NA |
| Gm47195 | 0 NA | NA | NA | NA | NA |
| Gm47199 | 0 NA | NA | NA | NA | NA |
| Gm47201 | 0 NA | NA | NA | NA | NA |
| Gm47203 | 0 NA | NA | NA | NA | NA |
| Gm47211 | 0 NA | NA | NA | NA | NA |
| Gm47213 | 0 NA | NA | NA | NA | NA |
| Gm47219 | 0 NA | NA | NA | NA | NA |
| Gm47220 | 0 NA | NA | NA | NA | NA |
| Gm47222 | 0 NA | NA | NA | NA | NA |
| Gm47225 | 0 NA | NA | NA | NA | NA |
| Gm47227 | 0 NA | NA | NA | NA | NA |
| Gm47228 | 0 NA | NA | NA | NA | NA |
| Gm47229 | 0 NA | NA | NA | NA | NA |
| Gm47236 | 0 NA | NA | NA | NA | NA |
| Gm47238 | 0 NA | NA | NA | NA | NA |
| Gm47241 | 0 NA | NA | NA | NA | NA |
| Gm47244 | 0 NA | NA | NA | NA | NA |
| Gm47245 | 0 NA | NA | NA | NA | NA |
| Gm47247 | 0 NA | NA | NA | NA | NA |
| Gm4725  | 0 NA | NA | NA | NA | NA |
| Gm47250 | 0 NA | NA | NA | NA | NA |
| Gm47255 | 0 NA | NA | NA | NA | NA |
| Gm47261 | 0 NA | NA | NA | NA | NA |
| Gm47263 | 0 NA | NA | NA | NA | NA |
| Gm47264 | 0 NA | NA | NA | NA | NA |
| Gm47268 | 0 NA | NA | NA | NA | NA |
| Gm47274 | 0 NA | NA | NA | NA | NA |
| Gm47317 | 0 NA | NA | NA | NA | NA |
| Gm47318 | 0 NA | NA | NA | NA | NA |
| Gm4732  | 0 NA | NA | NA | NA | NA |



|         |      |    |    |    |    |
|---------|------|----|----|----|----|
| Gm47323 | 0 NA | NA | NA | NA | NA |
| Gm47324 | 0 NA | NA | NA | NA | NA |
| Gm47329 | 0 NA | NA | NA | NA | NA |
| Gm47330 | 0 NA | NA | NA | NA | NA |
| Gm47332 | 0 NA | NA | NA | NA | NA |
| Gm47333 | 0 NA | NA | NA | NA | NA |
| Gm47335 | 0 NA | NA | NA | NA | NA |
| Gm47340 | 0 NA | NA | NA | NA | NA |
| Gm47344 | 0 NA | NA | NA | NA | NA |
| Gm4736  | 0 NA | NA | NA | NA | NA |
| Gm47361 | 0 NA | NA | NA | NA | NA |
| Gm47362 | 0 NA | NA | NA | NA | NA |
| Gm47363 | 0 NA | NA | NA | NA | NA |
| Gm47365 | 0 NA | NA | NA | NA | NA |
| Gm47366 | 0 NA | NA | NA | NA | NA |
| Gm47367 | 0 NA | NA | NA | NA | NA |
| Gm47369 | 0 NA | NA | NA | NA | NA |
| Gm47377 | 0 NA | NA | NA | NA | NA |
| Gm47379 | 0 NA | NA | NA | NA | NA |
| Gm47382 | 0 NA | NA | NA | NA | NA |
| Gm47383 | 0 NA | NA | NA | NA | NA |
| Gm47384 | 0 NA | NA | NA | NA | NA |
| Gm47385 | 0 NA | NA | NA | NA | NA |
| Gm47386 | 0 NA | NA | NA | NA | NA |
| Gm47387 | 0 NA | NA | NA | NA | NA |
| Gm47393 | 0 NA | NA | NA | NA | NA |
| Gm47394 | 0 NA | NA | NA | NA | NA |
| Gm47395 | 0 NA | NA | NA | NA | NA |
| Gm47399 | 0 NA | NA | NA | NA | NA |
| Gm47401 | 0 NA | NA | NA | NA | NA |
| Gm47410 | 0 NA | NA | NA | NA | NA |
| Gm47412 | 0 NA | NA | NA | NA | NA |
| Gm47413 | 0 NA | NA | NA | NA | NA |
| Gm47417 | 0 NA | NA | NA | NA | NA |
| Gm47420 | 0 NA | NA | NA | NA | NA |
| Gm47421 | 0 NA | NA | NA | NA | NA |
| Gm47422 | 0 NA | NA | NA | NA | NA |
| Gm47426 | 0 NA | NA | NA | NA | NA |
| Gm47429 | 0 NA | NA | NA | NA | NA |
| Gm47433 | 0 NA | NA | NA | NA | NA |
| Gm47437 | 0 NA | NA | NA | NA | NA |
| Gm47440 | 0 NA | NA | NA | NA | NA |
| Gm47441 | 0 NA | NA | NA | NA | NA |
| Gm47442 | 0 NA | NA | NA | NA | NA |
| Gm47443 | 0 NA | NA | NA | NA | NA |
| Gm47444 | 0 NA | NA | NA | NA | NA |
| Gm47446 | 0 NA | NA | NA | NA | NA |
| Gm47449 | 0 NA | NA | NA | NA | NA |
| Gm47451 | 0 NA | NA | NA | NA | NA |
| Gm47452 | 0 NA | NA | NA | NA | NA |
| Gm47455 | 0 NA | NA | NA | NA | NA |
| Gm47458 | 0 NA | NA | NA | NA | NA |
| Gm4746  | 0 NA | NA | NA | NA | NA |
| Gm47462 | 0 NA | NA | NA | NA | NA |
| Gm47463 | 0 NA | NA | NA | NA | NA |
| Gm47464 | 0 NA | NA | NA | NA | NA |
| Gm47466 | 0 NA | NA | NA | NA | NA |
| Gm47470 | 0 NA | NA | NA | NA | NA |
| Gm47473 | 0 NA | NA | NA | NA | NA |
| Gm47474 | 0 NA | NA | NA | NA | NA |
| Gm47478 | 0 NA | NA | NA | NA | NA |
| Gm47481 | 0 NA | NA | NA | NA | NA |
| Gm47482 | 0 NA | NA | NA | NA | NA |
| Gm47488 | 0 NA | NA | NA | NA | NA |
| Gm47490 | 0 NA | NA | NA | NA | NA |
| Gm47491 | 0 NA | NA | NA | NA | NA |

|         |      |    |    |    |    |
|---------|------|----|----|----|----|
| Gm47492 | 0 NA | NA | NA | NA | NA |
| Gm47497 | 0 NA | NA | NA | NA | NA |
| Gm47498 | 0 NA | NA | NA | NA | NA |
| Gm47500 | 0 NA | NA | NA | NA | NA |
| Gm47502 | 0 NA | NA | NA | NA | NA |
| Gm47505 | 0 NA | NA | NA | NA | NA |
| Gm47506 | 0 NA | NA | NA | NA | NA |
| Gm47516 | 0 NA | NA | NA | NA | NA |
| Gm47517 | 0 NA | NA | NA | NA | NA |
| Gm47521 | 0 NA | NA | NA | NA | NA |
| Gm47527 | 0 NA | NA | NA | NA | NA |
| Gm47529 | 0 NA | NA | NA | NA | NA |
| Gm4753  | 0 NA | NA | NA | NA | NA |
| Gm47534 | 0 NA | NA | NA | NA | NA |
| Gm47536 | 0 NA | NA | NA | NA | NA |
| Gm47537 | 0 NA | NA | NA | NA | NA |
| Gm47538 | 0 NA | NA | NA | NA | NA |
| Gm47539 | 0 NA | NA | NA | NA | NA |
| Gm47546 | 0 NA | NA | NA | NA | NA |
| Gm47553 | 0 NA | NA | NA | NA | NA |
| Gm47554 | 0 NA | NA | NA | NA | NA |
| Gm47555 | 0 NA | NA | NA | NA | NA |
| Gm47556 | 0 NA | NA | NA | NA | NA |
| Gm47560 | 0 NA | NA | NA | NA | NA |
| Gm47562 | 0 NA | NA | NA | NA | NA |
| Gm47563 | 0 NA | NA | NA | NA | NA |
| Gm47569 | 0 NA | NA | NA | NA | NA |
| Gm47570 | 0 NA | NA | NA | NA | NA |
| Gm47576 | 0 NA | NA | NA | NA | NA |
| Gm47581 | 0 NA | NA | NA | NA | NA |
| Gm47589 | 0 NA | NA | NA | NA | NA |
| Gm47597 | 0 NA | NA | NA | NA | NA |
| Gm47600 | 0 NA | NA | NA | NA | NA |
| Gm47609 | 0 NA | NA | NA | NA | NA |
| Gm47610 | 0 NA | NA | NA | NA | NA |
| Gm47612 | 0 NA | NA | NA | NA | NA |
| Gm47616 | 0 NA | NA | NA | NA | NA |
| Gm47617 | 0 NA | NA | NA | NA | NA |
| Gm47618 | 0 NA | NA | NA | NA | NA |
| Gm47619 | 0 NA | NA | NA | NA | NA |
| Gm47620 | 0 NA | NA | NA | NA | NA |
| Gm47635 | 0 NA | NA | NA | NA | NA |
| Gm47636 | 0 NA | NA | NA | NA | NA |
| Gm47638 | 0 NA | NA | NA | NA | NA |
| Gm47642 | 0 NA | NA | NA | NA | NA |
| Gm47647 | 0 NA | NA | NA | NA | NA |
| Gm47651 | 0 NA | NA | NA | NA | NA |
| Gm47653 | 0 NA | NA | NA | NA | NA |
| Gm47660 | 0 NA | NA | NA | NA | NA |
| Gm47670 | 0 NA | NA | NA | NA | NA |
| Gm47672 | 0 NA | NA | NA | NA | NA |
| Gm47679 | 0 NA | NA | NA | NA | NA |
| Gm47681 | 0 NA | NA | NA | NA | NA |
| Gm47686 | 0 NA | NA | NA | NA | NA |
| Gm47696 | 0 NA | NA | NA | NA | NA |
| Gm47699 | 0 NA | NA | NA | NA | NA |
| Gm47703 | 0 NA | NA | NA | NA | NA |
| Gm47706 | 0 NA | NA | NA | NA | NA |
| Gm47714 | 0 NA | NA | NA | NA | NA |
| Gm47717 | 0 NA | NA | NA | NA | NA |
| Gm4772  | 0 NA | NA | NA | NA | NA |
| Gm47721 | 0 NA | NA | NA | NA | NA |
| Gm47722 | 0 NA | NA | NA | NA | NA |
| Gm47724 | 0 NA | NA | NA | NA | NA |
| Gm47727 | 0 NA | NA | NA | NA | NA |
| Gm4773  | 0 NA | NA | NA | NA | NA |

|         |      |    |    |    |    |
|---------|------|----|----|----|----|
| Gm4774  | 0 NA | NA | NA | NA | NA |
| Gm47740 | 0 NA | NA | NA | NA | NA |
| Gm47741 | 0 NA | NA | NA | NA | NA |
| Gm47742 | 0 NA | NA | NA | NA | NA |
| Gm47744 | 0 NA | NA | NA | NA | NA |
| Gm47745 | 0 NA | NA | NA | NA | NA |
| Gm47746 | 0 NA | NA | NA | NA | NA |
| Gm47747 | 0 NA | NA | NA | NA | NA |
| Gm47748 | 0 NA | NA | NA | NA | NA |
| Gm47749 | 0 NA | NA | NA | NA | NA |
| Gm4775  | 0 NA | NA | NA | NA | NA |
| Gm47750 | 0 NA | NA | NA | NA | NA |
| Gm47755 | 0 NA | NA | NA | NA | NA |
| Gm47762 | 0 NA | NA | NA | NA | NA |
| Gm47763 | 0 NA | NA | NA | NA | NA |
| Gm47764 | 0 NA | NA | NA | NA | NA |
| Gm47768 | 0 NA | NA | NA | NA | NA |
| Gm4777  | 0 NA | NA | NA | NA | NA |
| Gm47776 | 0 NA | NA | NA | NA | NA |
| Gm47779 | 0 NA | NA | NA | NA | NA |
| Gm47783 | 0 NA | NA | NA | NA | NA |
| Gm47786 | 0 NA | NA | NA | NA | NA |
| Gm47787 | 0 NA | NA | NA | NA | NA |
| Gm47788 | 0 NA | NA | NA | NA | NA |
| Gm47791 | 0 NA | NA | NA | NA | NA |
| Gm47793 | 0 NA | NA | NA | NA | NA |
| Gm47799 | 0 NA | NA | NA | NA | NA |
| Gm47807 | 0 NA | NA | NA | NA | NA |
| Gm47809 | 0 NA | NA | NA | NA | NA |
| Gm4781  | 0 NA | NA | NA | NA | NA |
| Gm47810 | 0 NA | NA | NA | NA | NA |
| Gm47811 | 0 NA | NA | NA | NA | NA |
| Gm47812 | 0 NA | NA | NA | NA | NA |
| Gm47816 | 0 NA | NA | NA | NA | NA |
| Gm4782  | 0 NA | NA | NA | NA | NA |
| Gm47820 | 0 NA | NA | NA | NA | NA |
| Gm47825 | 0 NA | NA | NA | NA | NA |
| Gm47829 | 0 NA | NA | NA | NA | NA |
| Gm47830 | 0 NA | NA | NA | NA | NA |
| Gm47834 | 0 NA | NA | NA | NA | NA |
| Gm47835 | 0 NA | NA | NA | NA | NA |
| Gm47837 | 0 NA | NA | NA | NA | NA |
| Gm4784  | 0 NA | NA | NA | NA | NA |
| Gm47844 | 0 NA | NA | NA | NA | NA |
| Gm47845 | 0 NA | NA | NA | NA | NA |
| Gm47846 | 0 NA | NA | NA | NA | NA |
| Gm47848 | 0 NA | NA | NA | NA | NA |
| Gm4785  | 0 NA | NA | NA | NA | NA |
| Gm47852 | 0 NA | NA | NA | NA | NA |
| Gm47864 | 0 NA | NA | NA | NA | NA |
| Gm47866 | 0 NA | NA | NA | NA | NA |
| Gm47869 | 0 NA | NA | NA | NA | NA |
| Gm47873 | 0 NA | NA | NA | NA | NA |
| Gm47874 | 0 NA | NA | NA | NA | NA |
| Gm47876 | 0 NA | NA | NA | NA | NA |
| Gm47878 | 0 NA | NA | NA | NA | NA |
| Gm47880 | 0 NA | NA | NA | NA | NA |
| Gm47883 | 0 NA | NA | NA | NA | NA |
| Gm47885 | 0 NA | NA | NA | NA | NA |
| Gm47886 | 0 NA | NA | NA | NA | NA |
| Gm47891 | 0 NA | NA | NA | NA | NA |
| Gm47892 | 0 NA | NA | NA | NA | NA |
| Gm47894 | 0 NA | NA | NA | NA | NA |
| Gm47899 | 0 NA | NA | NA | NA | NA |
| Gm47901 | 0 NA | NA | NA | NA | NA |
| Gm47909 | 0 NA | NA | NA | NA | NA |

|         |      |    |    |    |    |
|---------|------|----|----|----|----|
| Gm47912 | 0 NA | NA | NA | NA | NA |
| Gm4792  | 0 NA | NA | NA | NA | NA |
| Gm47928 | 0 NA | NA | NA | NA | NA |
| Gm47929 | 0 NA | NA | NA | NA | NA |
| Gm47930 | 0 NA | NA | NA | NA | NA |
| Gm47940 | 0 NA | NA | NA | NA | NA |
| Gm47942 | 0 NA | NA | NA | NA | NA |
| Gm47945 | 0 NA | NA | NA | NA | NA |
| Gm47949 | 0 NA | NA | NA | NA | NA |
| Gm47952 | 0 NA | NA | NA | NA | NA |
| Gm47953 | 0 NA | NA | NA | NA | NA |
| Gm47955 | 0 NA | NA | NA | NA | NA |
| Gm47964 | 0 NA | NA | NA | NA | NA |
| Gm47965 | 0 NA | NA | NA | NA | NA |
| Gm47970 | 0 NA | NA | NA | NA | NA |
| Gm47973 | 0 NA | NA | NA | NA | NA |
| Gm47978 | 0 NA | NA | NA | NA | NA |
| Gm4798  | 0 NA | NA | NA | NA | NA |
| Gm47981 | 0 NA | NA | NA | NA | NA |
| Gm47984 | 0 NA | NA | NA | NA | NA |
| Gm47985 | 0 NA | NA | NA | NA | NA |
| Gm47986 | 0 NA | NA | NA | NA | NA |
| Gm47995 | 0 NA | NA | NA | NA | NA |
| Gm47996 | 0 NA | NA | NA | NA | NA |
| Gm47998 | 0 NA | NA | NA | NA | NA |
| Gm47999 | 0 NA | NA | NA | NA | NA |
| Gm48002 | 0 NA | NA | NA | NA | NA |
| Gm48005 | 0 NA | NA | NA | NA | NA |
| Gm48009 | 0 NA | NA | NA | NA | NA |
| Gm48011 | 0 NA | NA | NA | NA | NA |
| Gm48013 | 0 NA | NA | NA | NA | NA |
| Gm48016 | 0 NA | NA | NA | NA | NA |
| Gm48018 | 0 NA | NA | NA | NA | NA |
| Gm48019 | 0 NA | NA | NA | NA | NA |
| Gm48020 | 0 NA | NA | NA | NA | NA |
| Gm48026 | 0 NA | NA | NA | NA | NA |
| Gm48028 | 0 NA | NA | NA | NA | NA |
| Gm48029 | 0 NA | NA | NA | NA | NA |
| Gm48030 | 0 NA | NA | NA | NA | NA |
| Gm48031 | 0 NA | NA | NA | NA | NA |
| Gm48033 | 0 NA | NA | NA | NA | NA |
| Gm48034 | 0 NA | NA | NA | NA | NA |
| Gm48037 | 0 NA | NA | NA | NA | NA |
| Gm48039 | 0 NA | NA | NA | NA | NA |
| Gm48041 | 0 NA | NA | NA | NA | NA |
| Gm48042 | 0 NA | NA | NA | NA | NA |
| Gm48043 | 0 NA | NA | NA | NA | NA |
| Gm48044 | 0 NA | NA | NA | NA | NA |
| Gm48046 | 0 NA | NA | NA | NA | NA |
| Gm48047 | 0 NA | NA | NA | NA | NA |
| Gm48048 | 0 NA | NA | NA | NA | NA |
| Gm48049 | 0 NA | NA | NA | NA | NA |
| Gm48052 | 0 NA | NA | NA | NA | NA |
| Gm48055 | 0 NA | NA | NA | NA | NA |
| Gm48059 | 0 NA | NA | NA | NA | NA |
| Gm4806  | 0 NA | NA | NA | NA | NA |
| Gm48060 | 0 NA | NA | NA | NA | NA |
| Gm48064 | 0 NA | NA | NA | NA | NA |
| Gm48067 | 0 NA | NA | NA | NA | NA |
| Gm48070 | 0 NA | NA | NA | NA | NA |
| Gm48078 | 0 NA | NA | NA | NA | NA |
| Gm4808  | 0 NA | NA | NA | NA | NA |
| Gm48080 | 0 NA | NA | NA | NA | NA |
| Gm48083 | 0 NA | NA | NA | NA | NA |
| Gm48085 | 0 NA | NA | NA | NA | NA |
| Gm48087 | 0 NA | NA | NA | NA | NA |

|         |      |    |    |    |    |
|---------|------|----|----|----|----|
| Gm48088 | 0 NA | NA | NA | NA | NA |
| Gm48096 | 0 NA | NA | NA | NA | NA |
| Gm48097 | 0 NA | NA | NA | NA | NA |
| Gm48098 | 0 NA | NA | NA | NA | NA |
| Gm48100 | 0 NA | NA | NA | NA | NA |
| Gm48101 | 0 NA | NA | NA | NA | NA |
| Gm48103 | 0 NA | NA | NA | NA | NA |
| Gm48108 | 0 NA | NA | NA | NA | NA |
| Gm48109 | 0 NA | NA | NA | NA | NA |
| Gm48111 | 0 NA | NA | NA | NA | NA |
| Gm48110 | 0 NA | NA | NA | NA | NA |
| Gm48117 | 0 NA | NA | NA | NA | NA |
| Gm48118 | 0 NA | NA | NA | NA | NA |
| Gm4812  | 0 NA | NA | NA | NA | NA |
| Gm48120 | 0 NA | NA | NA | NA | NA |
| Gm48121 | 0 NA | NA | NA | NA | NA |
| Gm48122 | 0 NA | NA | NA | NA | NA |
| Gm48124 | 0 NA | NA | NA | NA | NA |
| Gm48126 | 0 NA | NA | NA | NA | NA |
| Gm48136 | 0 NA | NA | NA | NA | NA |
| Gm48142 | 0 NA | NA | NA | NA | NA |
| Gm48143 | 0 NA | NA | NA | NA | NA |
| Gm48144 | 0 NA | NA | NA | NA | NA |
| Gm48145 | 0 NA | NA | NA | NA | NA |
| Gm48147 | 0 NA | NA | NA | NA | NA |
| Gm48148 | 0 NA | NA | NA | NA | NA |
| Gm48149 | 0 NA | NA | NA | NA | NA |
| Gm4815  | 0 NA | NA | NA | NA | NA |
| Gm48150 | 0 NA | NA | NA | NA | NA |
| Gm48151 | 0 NA | NA | NA | NA | NA |
| Gm48152 | 0 NA | NA | NA | NA | NA |
| Gm48153 | 0 NA | NA | NA | NA | NA |
| Gm48154 | 0 NA | NA | NA | NA | NA |
| Gm48156 | 0 NA | NA | NA | NA | NA |
| Gm48157 | 0 NA | NA | NA | NA | NA |
| Gm48160 | 0 NA | NA | NA | NA | NA |
| Gm48164 | 0 NA | NA | NA | NA | NA |
| Gm48167 | 0 NA | NA | NA | NA | NA |
| Gm48169 | 0 NA | NA | NA | NA | NA |
| Gm4817  | 0 NA | NA | NA | NA | NA |
| Gm48171 | 0 NA | NA | NA | NA | NA |
| Gm48172 | 0 NA | NA | NA | NA | NA |
| Gm48173 | 0 NA | NA | NA | NA | NA |
| Gm48174 | 0 NA | NA | NA | NA | NA |
| Gm48175 | 0 NA | NA | NA | NA | NA |
| Gm48176 | 0 NA | NA | NA | NA | NA |
| Gm48178 | 0 NA | NA | NA | NA | NA |
| Gm48179 | 0 NA | NA | NA | NA | NA |
| Gm48180 | 0 NA | NA | NA | NA | NA |
| Gm48184 | 0 NA | NA | NA | NA | NA |
| Gm48185 | 0 NA | NA | NA | NA | NA |
| Gm48186 | 0 NA | NA | NA | NA | NA |
| Gm48188 | 0 NA | NA | NA | NA | NA |
| Gm4819  | 0 NA | NA | NA | NA | NA |
| Gm48191 | 0 NA | NA | NA | NA | NA |
| Gm48195 | 0 NA | NA | NA | NA | NA |
| Gm48196 | 0 NA | NA | NA | NA | NA |
| Gm48198 | 0 NA | NA | NA | NA | NA |
| Gm48201 | 0 NA | NA | NA | NA | NA |
| Gm48211 | 0 NA | NA | NA | NA | NA |
| Gm48212 | 0 NA | NA | NA | NA | NA |
| Gm48214 | 0 NA | NA | NA | NA | NA |
| Gm48217 | 0 NA | NA | NA | NA | NA |
| Gm48218 | 0 NA | NA | NA | NA | NA |
| Gm48219 | 0 NA | NA | NA | NA | NA |
| Gm4822  | 0 NA | NA | NA | NA | NA |

|         |      |    |    |    |    |
|---------|------|----|----|----|----|
| Gm48220 | 0 NA | NA | NA | NA | NA |
| Gm48224 | 0 NA | NA | NA | NA | NA |
| Gm48229 | 0 NA | NA | NA | NA | NA |
| Gm4823  | 0 NA | NA | NA | NA | NA |
| Gm48234 | 0 NA | NA | NA | NA | NA |
| Gm48235 | 0 NA | NA | NA | NA | NA |
| Gm48238 | 0 NA | NA | NA | NA | NA |
| Gm48241 | 0 NA | NA | NA | NA | NA |
| Gm48243 | 0 NA | NA | NA | NA | NA |
| Gm48245 | 0 NA | NA | NA | NA | NA |
| Gm48246 | 0 NA | NA | NA | NA | NA |
| Gm48247 | 0 NA | NA | NA | NA | NA |
| Gm48248 | 0 NA | NA | NA | NA | NA |
| Gm48251 | 0 NA | NA | NA | NA | NA |
| Gm48255 | 0 NA | NA | NA | NA | NA |
| Gm48258 | 0 NA | NA | NA | NA | NA |
| Gm48263 | 0 NA | NA | NA | NA | NA |
| Gm48272 | 0 NA | NA | NA | NA | NA |
| Gm48280 | 0 NA | NA | NA | NA | NA |
| Gm48282 | 0 NA | NA | NA | NA | NA |
| Gm48288 | 0 NA | NA | NA | NA | NA |
| Gm48289 | 0 NA | NA | NA | NA | NA |
| Gm48290 | 0 NA | NA | NA | NA | NA |
| Gm48291 | 0 NA | NA | NA | NA | NA |
| Gm48292 | 0 NA | NA | NA | NA | NA |
| Gm48297 | 0 NA | NA | NA | NA | NA |
| Gm48299 | 0 NA | NA | NA | NA | NA |
| Gm48300 | 0 NA | NA | NA | NA | NA |
| Gm48304 | 0 NA | NA | NA | NA | NA |
| Gm48305 | 0 NA | NA | NA | NA | NA |
| Gm4831  | 0 NA | NA | NA | NA | NA |
| Gm48310 | 0 NA | NA | NA | NA | NA |
| Gm48312 | 0 NA | NA | NA | NA | NA |
| Gm48315 | 0 NA | NA | NA | NA | NA |
| Gm48316 | 0 NA | NA | NA | NA | NA |
| Gm48317 | 0 NA | NA | NA | NA | NA |
| Gm48318 | 0 NA | NA | NA | NA | NA |
| Gm48319 | 0 NA | NA | NA | NA | NA |
| Gm4832  | 0 NA | NA | NA | NA | NA |
| Gm48320 | 0 NA | NA | NA | NA | NA |
| Gm48322 | 0 NA | NA | NA | NA | NA |
| Gm48323 | 0 NA | NA | NA | NA | NA |
| Gm48326 | 0 NA | NA | NA | NA | NA |
| Gm48329 | 0 NA | NA | NA | NA | NA |
| Gm48330 | 0 NA | NA | NA | NA | NA |
| Gm48337 | 0 NA | NA | NA | NA | NA |
| Gm48338 | 0 NA | NA | NA | NA | NA |
| Gm48340 | 0 NA | NA | NA | NA | NA |
| Gm48343 | 0 NA | NA | NA | NA | NA |
| Gm48344 | 0 NA | NA | NA | NA | NA |
| Gm48345 | 0 NA | NA | NA | NA | NA |
| Gm48347 | 0 NA | NA | NA | NA | NA |
| Gm48351 | 0 NA | NA | NA | NA | NA |
| Gm48352 | 0 NA | NA | NA | NA | NA |
| Gm48354 | 0 NA | NA | NA | NA | NA |
| Gm48355 | 0 NA | NA | NA | NA | NA |
| Gm48359 | 0 NA | NA | NA | NA | NA |
| Gm4836  | 0 NA | NA | NA | NA | NA |
| Gm48361 | 0 NA | NA | NA | NA | NA |
| Gm48367 | 0 NA | NA | NA | NA | NA |
| Gm48373 | 0 NA | NA | NA | NA | NA |
| Gm48376 | 0 NA | NA | NA | NA | NA |
| Gm48378 | 0 NA | NA | NA | NA | NA |
| Gm48379 | 0 NA | NA | NA | NA | NA |
| Gm48380 | 0 NA | NA | NA | NA | NA |
| Gm48388 | 0 NA | NA | NA | NA | NA |

|         |      |    |    |    |    |
|---------|------|----|----|----|----|
| Gm48389 | 0 NA | NA | NA | NA | NA |
| Gm48390 | 0 NA | NA | NA | NA | NA |
| Gm48392 | 0 NA | NA | NA | NA | NA |
| Gm48394 | 0 NA | NA | NA | NA | NA |
| Gm48400 | 0 NA | NA | NA | NA | NA |
| Gm48403 | 0 NA | NA | NA | NA | NA |
| Gm48404 | 0 NA | NA | NA | NA | NA |
| Gm48406 | 0 NA | NA | NA | NA | NA |
| Gm48409 | 0 NA | NA | NA | NA | NA |
| Gm48411 | 0 NA | NA | NA | NA | NA |
| Gm48413 | 0 NA | NA | NA | NA | NA |
| Gm48414 | 0 NA | NA | NA | NA | NA |
| Gm4842  | 0 NA | NA | NA | NA | NA |
| Gm48424 | 0 NA | NA | NA | NA | NA |
| Gm48425 | 0 NA | NA | NA | NA | NA |
| Gm48429 | 0 NA | NA | NA | NA | NA |
| Gm48431 | 0 NA | NA | NA | NA | NA |
| Gm48434 | 0 NA | NA | NA | NA | NA |
| Gm48440 | 0 NA | NA | NA | NA | NA |
| Gm48446 | 0 NA | NA | NA | NA | NA |
| Gm48448 | 0 NA | NA | NA | NA | NA |
| Gm4845  | 0 NA | NA | NA | NA | NA |
| Gm48450 | 0 NA | NA | NA | NA | NA |
| Gm48451 | 0 NA | NA | NA | NA | NA |
| Gm48452 | 0 NA | NA | NA | NA | NA |
| Gm48454 | 0 NA | NA | NA | NA | NA |
| Gm48455 | 0 NA | NA | NA | NA | NA |
| Gm48456 | 0 NA | NA | NA | NA | NA |
| Gm48457 | 0 NA | NA | NA | NA | NA |
| Gm48458 | 0 NA | NA | NA | NA | NA |
| Gm4846  | 0 NA | NA | NA | NA | NA |
| Gm48461 | 0 NA | NA | NA | NA | NA |
| Gm48463 | 0 NA | NA | NA | NA | NA |
| Gm48464 | 0 NA | NA | NA | NA | NA |
| Gm48465 | 0 NA | NA | NA | NA | NA |
| Gm48466 | 0 NA | NA | NA | NA | NA |
| Gm48468 | 0 NA | NA | NA | NA | NA |
| Gm48469 | 0 NA | NA | NA | NA | NA |
| Gm48470 | 0 NA | NA | NA | NA | NA |
| Gm48472 | 0 NA | NA | NA | NA | NA |
| Gm48473 | 0 NA | NA | NA | NA | NA |
| Gm48474 | 0 NA | NA | NA | NA | NA |
| Gm48475 | 0 NA | NA | NA | NA | NA |
| Gm48476 | 0 NA | NA | NA | NA | NA |
| Gm48477 | 0 NA | NA | NA | NA | NA |
| Gm48481 | 0 NA | NA | NA | NA | NA |
| Gm48484 | 0 NA | NA | NA | NA | NA |
| Gm48487 | 0 NA | NA | NA | NA | NA |
| Gm48489 | 0 NA | NA | NA | NA | NA |
| Gm48490 | 0 NA | NA | NA | NA | NA |
| Gm48496 | 0 NA | NA | NA | NA | NA |
| Gm4850  | 0 NA | NA | NA | NA | NA |
| Gm48506 | 0 NA | NA | NA | NA | NA |
| Gm48507 | 0 NA | NA | NA | NA | NA |
| Gm48509 | 0 NA | NA | NA | NA | NA |
| Gm48513 | 0 NA | NA | NA | NA | NA |
| Gm48514 | 0 NA | NA | NA | NA | NA |
| Gm48516 | 0 NA | NA | NA | NA | NA |
| Gm48517 | 0 NA | NA | NA | NA | NA |
| Gm48519 | 0 NA | NA | NA | NA | NA |
| Gm4852  | 0 NA | NA | NA | NA | NA |
| Gm48520 | 0 NA | NA | NA | NA | NA |
| Gm48523 | 0 NA | NA | NA | NA | NA |
| Gm48524 | 0 NA | NA | NA | NA | NA |
| Gm48525 | 0 NA | NA | NA | NA | NA |
| Gm48527 | 0 NA | NA | NA | NA | NA |

|         |      |    |    |    |    |
|---------|------|----|----|----|----|
| Gm48528 | 0 NA | NA | NA | NA | NA |
| Gm48531 | 0 NA | NA | NA | NA | NA |
| Gm48533 | 0 NA | NA | NA | NA | NA |
| Gm48534 | 0 NA | NA | NA | NA | NA |
| Gm4854  | 0 NA | NA | NA | NA | NA |
| Gm48540 | 0 NA | NA | NA | NA | NA |
| Gm48546 | 0 NA | NA | NA | NA | NA |
| Gm48547 | 0 NA | NA | NA | NA | NA |
| Gm48549 | 0 NA | NA | NA | NA | NA |
| Gm4855  | 0 NA | NA | NA | NA | NA |
| Gm48553 | 0 NA | NA | NA | NA | NA |
| Gm48554 | 0 NA | NA | NA | NA | NA |
| Gm48555 | 0 NA | NA | NA | NA | NA |
| Gm4856  | 0 NA | NA | NA | NA | NA |
| Gm48560 | 0 NA | NA | NA | NA | NA |
| Gm48561 | 0 NA | NA | NA | NA | NA |
| Gm48567 | 0 NA | NA | NA | NA | NA |
| Gm48568 | 0 NA | NA | NA | NA | NA |
| Gm48572 | 0 NA | NA | NA | NA | NA |
| Gm48575 | 0 NA | NA | NA | NA | NA |
| Gm48576 | 0 NA | NA | NA | NA | NA |
| Gm48579 | 0 NA | NA | NA | NA | NA |
| Gm48580 | 0 NA | NA | NA | NA | NA |
| Gm48587 | 0 NA | NA | NA | NA | NA |
| Gm48588 | 0 NA | NA | NA | NA | NA |
| Gm48589 | 0 NA | NA | NA | NA | NA |
| Gm48599 | 0 NA | NA | NA | NA | NA |
| Gm4860  | 0 NA | NA | NA | NA | NA |
| Gm48608 | 0 NA | NA | NA | NA | NA |
| Gm4861  | 0 NA | NA | NA | NA | NA |
| Gm48618 | 0 NA | NA | NA | NA | NA |
| Gm4862  | 0 NA | NA | NA | NA | NA |
| Gm48625 | 0 NA | NA | NA | NA | NA |
| Gm48628 | 0 NA | NA | NA | NA | NA |
| Gm4863  | 0 NA | NA | NA | NA | NA |
| Gm48634 | 0 NA | NA | NA | NA | NA |
| Gm48635 | 0 NA | NA | NA | NA | NA |
| Gm48636 | 0 NA | NA | NA | NA | NA |
| Gm48637 | 0 NA | NA | NA | NA | NA |
| Gm48638 | 0 NA | NA | NA | NA | NA |
| Gm48640 | 0 NA | NA | NA | NA | NA |
| Gm48642 | 0 NA | NA | NA | NA | NA |
| Gm48643 | 0 NA | NA | NA | NA | NA |
| Gm48644 | 0 NA | NA | NA | NA | NA |
| Gm48645 | 0 NA | NA | NA | NA | NA |
| Gm48647 | 0 NA | NA | NA | NA | NA |
| Gm48649 | 0 NA | NA | NA | NA | NA |
| Gm4865  | 0 NA | NA | NA | NA | NA |
| Gm48650 | 0 NA | NA | NA | NA | NA |
| Gm48652 | 0 NA | NA | NA | NA | NA |
| Gm48658 | 0 NA | NA | NA | NA | NA |
| Gm48659 | 0 NA | NA | NA | NA | NA |
| Gm4866  | 0 NA | NA | NA | NA | NA |
| Gm48661 | 0 NA | NA | NA | NA | NA |
| Gm48666 | 0 NA | NA | NA | NA | NA |
| Gm48667 | 0 NA | NA | NA | NA | NA |
| Gm48668 | 0 NA | NA | NA | NA | NA |
| Gm48669 | 0 NA | NA | NA | NA | NA |
| Gm48670 | 0 NA | NA | NA | NA | NA |
| Gm48675 | 0 NA | NA | NA | NA | NA |
| Gm48679 | 0 NA | NA | NA | NA | NA |
| Gm4868  | 0 NA | NA | NA | NA | NA |
| Gm48685 | 0 NA | NA | NA | NA | NA |
| Gm48688 | 0 NA | NA | NA | NA | NA |
| Gm48698 | 0 NA | NA | NA | NA | NA |
| Gm4871  | 0 NA | NA | NA | NA | NA |



|         |      |    |    |    |    |
|---------|------|----|----|----|----|
| Gm48711 | 0 NA | NA | NA | NA | NA |
| Gm48712 | 0 NA | NA | NA | NA | NA |
| Gm48725 | 0 NA | NA | NA | NA | NA |
| Gm48729 | 0 NA | NA | NA | NA | NA |
| Gm48731 | 0 NA | NA | NA | NA | NA |
| Gm48733 | 0 NA | NA | NA | NA | NA |
| Gm48736 | 0 NA | NA | NA | NA | NA |
| Gm48739 | 0 NA | NA | NA | NA | NA |
| Gm4874  | 0 NA | NA | NA | NA | NA |
| Gm48750 | 0 NA | NA | NA | NA | NA |
| Gm48753 | 0 NA | NA | NA | NA | NA |
| Gm48756 | 0 NA | NA | NA | NA | NA |
| Gm48758 | 0 NA | NA | NA | NA | NA |
| Gm48760 | 0 NA | NA | NA | NA | NA |
| Gm48769 | 0 NA | NA | NA | NA | NA |
| Gm4877  | 0 NA | NA | NA | NA | NA |
| Gm48776 | 0 NA | NA | NA | NA | NA |
| Gm48777 | 0 NA | NA | NA | NA | NA |
| Gm48781 | 0 NA | NA | NA | NA | NA |
| Gm48782 | 0 NA | NA | NA | NA | NA |
| Gm48785 | 0 NA | NA | NA | NA | NA |
| Gm48787 | 0 NA | NA | NA | NA | NA |
| Gm48794 | 0 NA | NA | NA | NA | NA |
| Gm4880  | 0 NA | NA | NA | NA | NA |
| Gm48805 | 0 NA | NA | NA | NA | NA |
| Gm48806 | 0 NA | NA | NA | NA | NA |
| Gm48808 | 0 NA | NA | NA | NA | NA |
| Gm4881  | 0 NA | NA | NA | NA | NA |
| Gm48811 | 0 NA | NA | NA | NA | NA |
| Gm48813 | 0 NA | NA | NA | NA | NA |
| Gm48816 | 0 NA | NA | NA | NA | NA |
| Gm48817 | 0 NA | NA | NA | NA | NA |
| Gm48818 | 0 NA | NA | NA | NA | NA |
| Gm48826 | 0 NA | NA | NA | NA | NA |
| Gm48828 | 0 NA | NA | NA | NA | NA |
| Gm48839 | 0 NA | NA | NA | NA | NA |
| Gm4884  | 0 NA | NA | NA | NA | NA |
| Gm48846 | 0 NA | NA | NA | NA | NA |
| Gm48848 | 0 NA | NA | NA | NA | NA |
| Gm48849 | 0 NA | NA | NA | NA | NA |
| Gm48852 | 0 NA | NA | NA | NA | NA |
| Gm48856 | 0 NA | NA | NA | NA | NA |
| Gm48858 | 0 NA | NA | NA | NA | NA |
| Gm48859 | 0 NA | NA | NA | NA | NA |
| Gm4886  | 0 NA | NA | NA | NA | NA |
| Gm48864 | 0 NA | NA | NA | NA | NA |
| Gm48875 | 0 NA | NA | NA | NA | NA |
| Gm48886 | 0 NA | NA | NA | NA | NA |
| Gm4889  | 0 NA | NA | NA | NA | NA |
| Gm48891 | 0 NA | NA | NA | NA | NA |
| Gm48892 | 0 NA | NA | NA | NA | NA |
| Gm48894 | 0 NA | NA | NA | NA | NA |
| Gm48895 | 0 NA | NA | NA | NA | NA |
| Gm48897 | 0 NA | NA | NA | NA | NA |
| Gm48906 | 0 NA | NA | NA | NA | NA |
| Gm4891  | 0 NA | NA | NA | NA | NA |
| Gm48915 | 0 NA | NA | NA | NA | NA |
| Gm48921 | 0 NA | NA | NA | NA | NA |
| Gm48922 | 0 NA | NA | NA | NA | NA |
| Gm48926 | 0 NA | NA | NA | NA | NA |
| Gm48927 | 0 NA | NA | NA | NA | NA |
| Gm48929 | 0 NA | NA | NA | NA | NA |
| Gm48934 | 0 NA | NA | NA | NA | NA |
| Gm48937 | 0 NA | NA | NA | NA | NA |
| Gm48938 | 0 NA | NA | NA | NA | NA |
| Gm4894  | 0 NA | NA | NA | NA | NA |

|         |      |    |    |    |    |
|---------|------|----|----|----|----|
| Gm48947 | 0 NA | NA | NA | NA | NA |
| Gm48951 | 0 NA | NA | NA | NA | NA |
| Gm48953 | 0 NA | NA | NA | NA | NA |
| Gm48955 | 0 NA | NA | NA | NA | NA |
| Gm48959 | 0 NA | NA | NA | NA | NA |
| Gm48962 | 0 NA | NA | NA | NA | NA |
| Gm48963 | 0 NA | NA | NA | NA | NA |
| Gm48971 | 0 NA | NA | NA | NA | NA |
| Gm48973 | 0 NA | NA | NA | NA | NA |
| Gm48980 | 0 NA | NA | NA | NA | NA |
| Gm48982 | 0 NA | NA | NA | NA | NA |
| Gm48983 | 0 NA | NA | NA | NA | NA |
| Gm48985 | 0 NA | NA | NA | NA | NA |
| Gm48987 | 0 NA | NA | NA | NA | NA |
| Gm48988 | 0 NA | NA | NA | NA | NA |
| Gm48989 | 0 NA | NA | NA | NA | NA |
| Gm4899  | 0 NA | NA | NA | NA | NA |
| Gm48993 | 0 NA | NA | NA | NA | NA |
| Gm48994 | 0 NA | NA | NA | NA | NA |
| Gm48995 | 0 NA | NA | NA | NA | NA |
| Gm48999 | 0 NA | NA | NA | NA | NA |
| Gm4900  | 0 NA | NA | NA | NA | NA |
| Gm49005 | 0 NA | NA | NA | NA | NA |
| Gm49006 | 0 NA | NA | NA | NA | NA |
| Gm49009 | 0 NA | NA | NA | NA | NA |
| Gm49011 | 0 NA | NA | NA | NA | NA |
| Gm49013 | 0 NA | NA | NA | NA | NA |
| Gm49021 | 0 NA | NA | NA | NA | NA |
| Gm49023 | 0 NA | NA | NA | NA | NA |
| Gm4903  | 0 NA | NA | NA | NA | NA |
| Gm49033 | 0 NA | NA | NA | NA | NA |
| Gm49034 | 0 NA | NA | NA | NA | NA |
| Gm49036 | 0 NA | NA | NA | NA | NA |
| Gm49038 | 0 NA | NA | NA | NA | NA |
| Gm4904  | 0 NA | NA | NA | NA | NA |
| Gm49040 | 0 NA | NA | NA | NA | NA |
| Gm49043 | 0 NA | NA | NA | NA | NA |
| Gm49045 | 0 NA | NA | NA | NA | NA |
| Gm49047 | 0 NA | NA | NA | NA | NA |
| Gm49049 | 0 NA | NA | NA | NA | NA |
| Gm49050 | 0 NA | NA | NA | NA | NA |
| Gm49052 | 0 NA | NA | NA | NA | NA |
| Gm49053 | 0 NA | NA | NA | NA | NA |
| Gm49055 | 0 NA | NA | NA | NA | NA |
| Gm49056 | 0 NA | NA | NA | NA | NA |
| Gm49060 | 0 NA | NA | NA | NA | NA |
| Gm49061 | 0 NA | NA | NA | NA | NA |
| Gm49062 | 0 NA | NA | NA | NA | NA |
| Gm49063 | 0 NA | NA | NA | NA | NA |
| Gm49068 | 0 NA | NA | NA | NA | NA |
| Gm49070 | 0 NA | NA | NA | NA | NA |
| Gm49071 | 0 NA | NA | NA | NA | NA |
| Gm49072 | 0 NA | NA | NA | NA | NA |
| Gm49073 | 0 NA | NA | NA | NA | NA |
| Gm49074 | 0 NA | NA | NA | NA | NA |
| Gm49075 | 0 NA | NA | NA | NA | NA |
| Gm49078 | 0 NA | NA | NA | NA | NA |
| Gm49079 | 0 NA | NA | NA | NA | NA |
| Gm4908  | 0 NA | NA | NA | NA | NA |
| Gm49080 | 0 NA | NA | NA | NA | NA |
| Gm49081 | 0 NA | NA | NA | NA | NA |
| Gm49082 | 0 NA | NA | NA | NA | NA |
| Gm49084 | 0 NA | NA | NA | NA | NA |
| Gm49088 | 0 NA | NA | NA | NA | NA |
| Gm4909  | 0 NA | NA | NA | NA | NA |
| Gm49090 | 0 NA | NA | NA | NA | NA |

|         |      |    |    |    |    |
|---------|------|----|----|----|----|
| Gm49091 | 0 NA | NA | NA | NA | NA |
| Gm49093 | 0 NA | NA | NA | NA | NA |
| Gm49094 | 0 NA | NA | NA | NA | NA |
| Gm49103 | 0 NA | NA | NA | NA | NA |
| Gm49104 | 0 NA | NA | NA | NA | NA |
| Gm49109 | 0 NA | NA | NA | NA | NA |
| Gm49111 | 0 NA | NA | NA | NA | NA |
| Gm49110 | 0 NA | NA | NA | NA | NA |
| Gm49112 | 0 NA | NA | NA | NA | NA |
| Gm49114 | 0 NA | NA | NA | NA | NA |
| Gm49115 | 0 NA | NA | NA | NA | NA |
| Gm49117 | 0 NA | NA | NA | NA | NA |
| Gm49118 | 0 NA | NA | NA | NA | NA |
| Gm4912  | 0 NA | NA | NA | NA | NA |
| Gm49122 | 0 NA | NA | NA | NA | NA |
| Gm49129 | 0 NA | NA | NA | NA | NA |
| Gm4913  | 0 NA | NA | NA | NA | NA |
| Gm49131 | 0 NA | NA | NA | NA | NA |
| Gm49133 | 0 NA | NA | NA | NA | NA |
| Gm49134 | 0 NA | NA | NA | NA | NA |
| Gm49136 | 0 NA | NA | NA | NA | NA |
| Gm49137 | 0 NA | NA | NA | NA | NA |
| Gm49138 | 0 NA | NA | NA | NA | NA |
| Gm49139 | 0 NA | NA | NA | NA | NA |
| Gm4914  | 0 NA | NA | NA | NA | NA |
| Gm49140 | 0 NA | NA | NA | NA | NA |
| Gm49142 | 0 NA | NA | NA | NA | NA |
| Gm49147 | 0 NA | NA | NA | NA | NA |
| Gm49148 | 0 NA | NA | NA | NA | NA |
| Gm49155 | 0 NA | NA | NA | NA | NA |
| Gm49157 | 0 NA | NA | NA | NA | NA |
| Gm49158 | 0 NA | NA | NA | NA | NA |
| Gm4916  | 0 NA | NA | NA | NA | NA |
| Gm49168 | 0 NA | NA | NA | NA | NA |
| Gm4917  | 0 NA | NA | NA | NA | NA |
| Gm49174 | 0 NA | NA | NA | NA | NA |
| Gm49176 | 0 NA | NA | NA | NA | NA |
| Gm49178 | 0 NA | NA | NA | NA | NA |
| Gm4918  | 0 NA | NA | NA | NA | NA |
| Gm49185 | 0 NA | NA | NA | NA | NA |
| Gm49186 | 0 NA | NA | NA | NA | NA |
| Gm4919  | 0 NA | NA | NA | NA | NA |
| Gm49190 | 0 NA | NA | NA | NA | NA |
| Gm49193 | 0 NA | NA | NA | NA | NA |
| Gm49202 | 0 NA | NA | NA | NA | NA |
| Gm49203 | 0 NA | NA | NA | NA | NA |
| Gm49205 | 0 NA | NA | NA | NA | NA |
| Gm49206 | 0 NA | NA | NA | NA | NA |
| Gm49209 | 0 NA | NA | NA | NA | NA |
| Gm4921  | 0 NA | NA | NA | NA | NA |
| Gm49210 | 0 NA | NA | NA | NA | NA |
| Gm49213 | 0 NA | NA | NA | NA | NA |
| Gm49214 | 0 NA | NA | NA | NA | NA |
| Gm49215 | 0 NA | NA | NA | NA | NA |
| Gm49218 | 0 NA | NA | NA | NA | NA |
| Gm49219 | 0 NA | NA | NA | NA | NA |
| Gm49220 | 0 NA | NA | NA | NA | NA |
| Gm49221 | 0 NA | NA | NA | NA | NA |
| Gm49222 | 0 NA | NA | NA | NA | NA |
| Gm49228 | 0 NA | NA | NA | NA | NA |
| Gm49229 | 0 NA | NA | NA | NA | NA |
| Gm49230 | 0 NA | NA | NA | NA | NA |
| Gm49232 | 0 NA | NA | NA | NA | NA |
| Gm49235 | 0 NA | NA | NA | NA | NA |
| Gm49239 | 0 NA | NA | NA | NA | NA |
| Gm49241 | 0 NA | NA | NA | NA | NA |

|         |      |    |    |    |    |
|---------|------|----|----|----|----|
| Gm49242 | 0 NA | NA | NA | NA | NA |
| Gm49244 | 0 NA | NA | NA | NA | NA |
| Gm49245 | 0 NA | NA | NA | NA | NA |
| Gm49248 | 0 NA | NA | NA | NA | NA |
| Gm49250 | 0 NA | NA | NA | NA | NA |
| Gm49251 | 0 NA | NA | NA | NA | NA |
| Gm49253 | 0 NA | NA | NA | NA | NA |
| Gm49255 | 0 NA | NA | NA | NA | NA |
| Gm49258 | 0 NA | NA | NA | NA | NA |
| Gm49259 | 0 NA | NA | NA | NA | NA |
| Gm49261 | 0 NA | NA | NA | NA | NA |
| Gm49264 | 0 NA | NA | NA | NA | NA |
| Gm49269 | 0 NA | NA | NA | NA | NA |
| Gm4927  | 0 NA | NA | NA | NA | NA |
| Gm49276 | 0 NA | NA | NA | NA | NA |
| Gm49277 | 0 NA | NA | NA | NA | NA |
| Gm49278 | 0 NA | NA | NA | NA | NA |
| Gm49279 | 0 NA | NA | NA | NA | NA |
| Gm4928  | 0 NA | NA | NA | NA | NA |
| Gm49281 | 0 NA | NA | NA | NA | NA |
| Gm49287 | 0 NA | NA | NA | NA | NA |
| Gm49290 | 0 NA | NA | NA | NA | NA |
| Gm49294 | 0 NA | NA | NA | NA | NA |
| Gm49295 | 0 NA | NA | NA | NA | NA |
| Gm49299 | 0 NA | NA | NA | NA | NA |
| Gm4930  | 0 NA | NA | NA | NA | NA |
| Gm49301 | 0 NA | NA | NA | NA | NA |
| Gm49315 | 0 NA | NA | NA | NA | NA |
| Gm49316 | 0 NA | NA | NA | NA | NA |
| Gm49318 | 0 NA | NA | NA | NA | NA |
| Gm49330 | 0 NA | NA | NA | NA | NA |
| Gm49332 | 0 NA | NA | NA | NA | NA |
| Gm49333 | 0 NA | NA | NA | NA | NA |
| Gm49337 | 0 NA | NA | NA | NA | NA |
| Gm49341 | 0 NA | NA | NA | NA | NA |
| Gm49345 | 0 NA | NA | NA | NA | NA |
| Gm4935  | 0 NA | NA | NA | NA | NA |
| Gm49352 | 0 NA | NA | NA | NA | NA |
| Gm49354 | 0 NA | NA | NA | NA | NA |
| Gm49360 | 0 NA | NA | NA | NA | NA |
| Gm49361 | 0 NA | NA | NA | NA | NA |
| Gm49362 | 0 NA | NA | NA | NA | NA |
| Gm49363 | 0 NA | NA | NA | NA | NA |
| Gm49370 | 0 NA | NA | NA | NA | NA |
| Gm49372 | 0 NA | NA | NA | NA | NA |
| Gm49374 | 0 NA | NA | NA | NA | NA |
| Gm49379 | 0 NA | NA | NA | NA | NA |
| Gm4938  | 0 NA | NA | NA | NA | NA |
| Gm49381 | 0 NA | NA | NA | NA | NA |
| Gm49382 | 0 NA | NA | NA | NA | NA |
| Gm49385 | 0 NA | NA | NA | NA | NA |
| Gm49386 | 0 NA | NA | NA | NA | NA |
| Gm49398 | 0 NA | NA | NA | NA | NA |
| Gm49403 | 0 NA | NA | NA | NA | NA |
| Gm49404 | 0 NA | NA | NA | NA | NA |
| Gm49406 | 0 NA | NA | NA | NA | NA |
| Gm49407 | 0 NA | NA | NA | NA | NA |
| Gm49408 | 0 NA | NA | NA | NA | NA |
| Gm49409 | 0 NA | NA | NA | NA | NA |
| Gm49414 | 0 NA | NA | NA | NA | NA |
| Gm49416 | 0 NA | NA | NA | NA | NA |
| Gm4942  | 0 NA | NA | NA | NA | NA |
| Gm49423 | 0 NA | NA | NA | NA | NA |
| Gm49424 | 0 NA | NA | NA | NA | NA |
| Gm49425 | 0 NA | NA | NA | NA | NA |
| Gm49426 | 0 NA | NA | NA | NA | NA |

|         |      |    |    |    |    |
|---------|------|----|----|----|----|
| Gm49433 | 0 NA | NA | NA | NA | NA |
| Gm49434 | 0 NA | NA | NA | NA | NA |
| Gm49440 | 0 NA | NA | NA | NA | NA |
| Gm49443 | 0 NA | NA | NA | NA | NA |
| Gm49444 | 0 NA | NA | NA | NA | NA |
| Gm49447 | 0 NA | NA | NA | NA | NA |
| Gm4945  | 0 NA | NA | NA | NA | NA |
| Gm49453 | 0 NA | NA | NA | NA | NA |
| Gm49456 | 0 NA | NA | NA | NA | NA |
| Gm49458 | 0 NA | NA | NA | NA | NA |
| Gm49465 | 0 NA | NA | NA | NA | NA |
| Gm49467 | 0 NA | NA | NA | NA | NA |
| Gm49473 | 0 NA | NA | NA | NA | NA |
| Gm49478 | 0 NA | NA | NA | NA | NA |
| Gm49480 | 0 NA | NA | NA | NA | NA |
| Gm49485 | 0 NA | NA | NA | NA | NA |
| Gm49487 | 0 NA | NA | NA | NA | NA |
| Gm49488 | 0 NA | NA | NA | NA | NA |
| Gm49491 | 0 NA | NA | NA | NA | NA |
| Gm49505 | 0 NA | NA | NA | NA | NA |
| Gm49508 | 0 NA | NA | NA | NA | NA |
| Gm49509 | 0 NA | NA | NA | NA | NA |
| Gm49514 | 0 NA | NA | NA | NA | NA |
| Gm49515 | 0 NA | NA | NA | NA | NA |
| Gm49516 | 0 NA | NA | NA | NA | NA |
| Gm49517 | 0 NA | NA | NA | NA | NA |
| Gm49527 | 0 NA | NA | NA | NA | NA |
| Gm49528 | 0 NA | NA | NA | NA | NA |
| Gm49529 | 0 NA | NA | NA | NA | NA |
| Gm49531 | 0 NA | NA | NA | NA | NA |
| Gm49532 | 0 NA | NA | NA | NA | NA |
| Gm49533 | 0 NA | NA | NA | NA | NA |
| Gm49535 | 0 NA | NA | NA | NA | NA |
| Gm49536 | 0 NA | NA | NA | NA | NA |
| Gm49537 | 0 NA | NA | NA | NA | NA |
| Gm49538 | 0 NA | NA | NA | NA | NA |
| Gm4954  | 0 NA | NA | NA | NA | NA |
| Gm49541 | 0 NA | NA | NA | NA | NA |
| Gm49545 | 0 NA | NA | NA | NA | NA |
| Gm49546 | 0 NA | NA | NA | NA | NA |
| Gm49547 | 0 NA | NA | NA | NA | NA |
| Gm49551 | 0 NA | NA | NA | NA | NA |
| Gm49554 | 0 NA | NA | NA | NA | NA |
| Gm49580 | 0 NA | NA | NA | NA | NA |
| Gm49661 | 0 NA | NA | NA | NA | NA |
| Gm4971  | 0 NA | NA | NA | NA | NA |
| Gm4973  | 0 NA | NA | NA | NA | NA |
| Gm4974  | 0 NA | NA | NA | NA | NA |
| Gm49772 | 0 NA | NA | NA | NA | NA |
| Gm4982  | 0 NA | NA | NA | NA | NA |
| Gm4984  | 0 NA | NA | NA | NA | NA |
| Gm4985  | 0 NA | NA | NA | NA | NA |
| Gm4986  | 0 NA | NA | NA | NA | NA |
| Gm4987  | 0 NA | NA | NA | NA | NA |
| Gm4989  | 0 NA | NA | NA | NA | NA |
| Gm4991  | 0 NA | NA | NA | NA | NA |
| Gm49918 | 0 NA | NA | NA | NA | NA |
| Gm4992  | 0 NA | NA | NA | NA | NA |
| Gm49920 | 0 NA | NA | NA | NA | NA |
| Gm49929 | 0 NA | NA | NA | NA | NA |
| Gm4993  | 0 NA | NA | NA | NA | NA |
| Gm49936 | 0 NA | NA | NA | NA | NA |
| Gm4995  | 0 NA | NA | NA | NA | NA |
| Gm4996  | 0 NA | NA | NA | NA | NA |
| Gm4997  | 0 NA | NA | NA | NA | NA |
| Gm5001  | 0 NA | NA | NA | NA | NA |

|         |      |    |    |    |    |
|---------|------|----|----|----|----|
| Gm5002  | 0 NA | NA | NA | NA | NA |
| Gm5010  | 0 NA | NA | NA | NA | NA |
| Gm5023  | 0 NA | NA | NA | NA | NA |
| Gm5027  | 0 NA | NA | NA | NA | NA |
| Gm5034  | 0 NA | NA | NA | NA | NA |
| Gm5035  | 0 NA | NA | NA | NA | NA |
| Gm5037  | 0 NA | NA | NA | NA | NA |
| Gm5042  | 0 NA | NA | NA | NA | NA |
| Gm5043  | 0 NA | NA | NA | NA | NA |
| Gm5046  | 0 NA | NA | NA | NA | NA |
| Gm50490 | 0 NA | NA | NA | NA | NA |
| Gm5050  | 0 NA | NA | NA | NA | NA |
| Gm5051  | 0 NA | NA | NA | NA | NA |
| Gm5053  | 0 NA | NA | NA | NA | NA |
| Gm5054  | 0 NA | NA | NA | NA | NA |
| Gm5055  | 0 NA | NA | NA | NA | NA |
| Gm5058  | 0 NA | NA | NA | NA | NA |
| Gm5060  | 0 NA | NA | NA | NA | NA |
| Gm5065  | 0 NA | NA | NA | NA | NA |
| Gm5066  | 0 NA | NA | NA | NA | NA |
| Gm5070  | 0 NA | NA | NA | NA | NA |
| Gm5071  | 0 NA | NA | NA | NA | NA |
| Gm5072  | 0 NA | NA | NA | NA | NA |
| Gm5089  | 0 NA | NA | NA | NA | NA |
| Gm5110  | 0 NA | NA | NA | NA | NA |
| Gm5114  | 0 NA | NA | NA | NA | NA |
| Gm5116  | 0 NA | NA | NA | NA | NA |
| Gm5119  | 0 NA | NA | NA | NA | NA |
| Gm5120  | 0 NA | NA | NA | NA | NA |
| Gm5125  | 0 NA | NA | NA | NA | NA |
| Gm5128  | 0 NA | NA | NA | NA | NA |
| Gm5129  | 0 NA | NA | NA | NA | NA |
| Gm5130  | 0 NA | NA | NA | NA | NA |
| Gm5131  | 0 NA | NA | NA | NA | NA |
| Gm5133  | 0 NA | NA | NA | NA | NA |
| Gm5136  | 0 NA | NA | NA | NA | NA |
| Gm5139  | 0 NA | NA | NA | NA | NA |
| Gm5142  | 0 NA | NA | NA | NA | NA |
| Gm5145  | 0 NA | NA | NA | NA | NA |
| Gm5147  | 0 NA | NA | NA | NA | NA |
| Gm5152  | 0 NA | NA | NA | NA | NA |
| Gm5154  | 0 NA | NA | NA | NA | NA |
| Gm5155  | 0 NA | NA | NA | NA | NA |
| Gm5161  | 0 NA | NA | NA | NA | NA |
| Gm5166  | 0 NA | NA | NA | NA | NA |
| Gm5168  | 0 NA | NA | NA | NA | NA |
| Gm5169  | 0 NA | NA | NA | NA | NA |
| Gm5174  | 0 NA | NA | NA | NA | NA |
| Gm5178  | 0 NA | NA | NA | NA | NA |
| Gm5181  | 0 NA | NA | NA | NA | NA |
| Gm5183  | 0 NA | NA | NA | NA | NA |
| Gm5184  | 0 NA | NA | NA | NA | NA |
| Gm5185  | 0 NA | NA | NA | NA | NA |
| Gm5186  | 0 NA | NA | NA | NA | NA |
| Gm5189  | 0 NA | NA | NA | NA | NA |
| Gm5190  | 0 NA | NA | NA | NA | NA |
| Gm5194  | 0 NA | NA | NA | NA | NA |
| Gm5195  | 0 NA | NA | NA | NA | NA |
| Gm5197  | 0 NA | NA | NA | NA | NA |
| Gm5199  | 0 NA | NA | NA | NA | NA |
| Gm5200  | 0 NA | NA | NA | NA | NA |
| Gm5203  | 0 NA | NA | NA | NA | NA |
| Gm5204  | 0 NA | NA | NA | NA | NA |
| Gm5207  | 0 NA | NA | NA | NA | NA |
| Gm5209  | 0 NA | NA | NA | NA | NA |
| Gm5213  | 0 NA | NA | NA | NA | NA |

|        |      |    |    |    |    |
|--------|------|----|----|----|----|
| Gm5214 | 0 NA | NA | NA | NA | NA |
| Gm5215 | 0 NA | NA | NA | NA | NA |
| Gm5216 | 0 NA | NA | NA | NA | NA |
| Gm5218 | 0 NA | NA | NA | NA | NA |
| Gm5219 | 0 NA | NA | NA | NA | NA |
| Gm5224 | 0 NA | NA | NA | NA | NA |
| Gm5229 | 0 NA | NA | NA | NA | NA |
| Gm5250 | 0 NA | NA | NA | NA | NA |
| Gm5251 | 0 NA | NA | NA | NA | NA |
| Gm5252 | 0 NA | NA | NA | NA | NA |
| Gm5253 | 0 NA | NA | NA | NA | NA |
| Gm5254 | 0 NA | NA | NA | NA | NA |
| Gm5255 | 0 NA | NA | NA | NA | NA |
| Gm5257 | 0 NA | NA | NA | NA | NA |
| Gm5258 | 0 NA | NA | NA | NA | NA |
| Gm5259 | 0 NA | NA | NA | NA | NA |
| Gm5260 | 0 NA | NA | NA | NA | NA |
| Gm5261 | 0 NA | NA | NA | NA | NA |
| Gm5262 | 0 NA | NA | NA | NA | NA |
| Gm5264 | 0 NA | NA | NA | NA | NA |
| Gm5265 | 0 NA | NA | NA | NA | NA |
| Gm5266 | 0 NA | NA | NA | NA | NA |
| Gm5268 | 0 NA | NA | NA | NA | NA |
| Gm5274 | 0 NA | NA | NA | NA | NA |
| Gm5276 | 0 NA | NA | NA | NA | NA |
| Gm5277 | 0 NA | NA | NA | NA | NA |
| Gm5283 | 0 NA | NA | NA | NA | NA |
| Gm5284 | 0 NA | NA | NA | NA | NA |
| Gm5285 | 0 NA | NA | NA | NA | NA |
| Gm5287 | 0 NA | NA | NA | NA | NA |
| Gm5288 | 0 NA | NA | NA | NA | NA |
| Gm5297 | 0 NA | NA | NA | NA | NA |
| Gm5298 | 0 NA | NA | NA | NA | NA |
| Gm5302 | 0 NA | NA | NA | NA | NA |
| Gm5305 | 0 NA | NA | NA | NA | NA |
| Gm5306 | 0 NA | NA | NA | NA | NA |
| Gm5307 | 0 NA | NA | NA | NA | NA |
| Gm5308 | 0 NA | NA | NA | NA | NA |
| Gm5310 | 0 NA | NA | NA | NA | NA |
| Gm5312 | 0 NA | NA | NA | NA | NA |
| Gm5313 | 0 NA | NA | NA | NA | NA |
| Gm5314 | 0 NA | NA | NA | NA | NA |
| Gm5315 | 0 NA | NA | NA | NA | NA |
| Gm5317 | 0 NA | NA | NA | NA | NA |
| Gm5318 | 0 NA | NA | NA | NA | NA |
| Gm5319 | 0 NA | NA | NA | NA | NA |
| Gm5320 | 0 NA | NA | NA | NA | NA |
| Gm5321 | 0 NA | NA | NA | NA | NA |
| Gm5322 | 0 NA | NA | NA | NA | NA |
| Gm5324 | 0 NA | NA | NA | NA | NA |
| Gm5327 | 0 NA | NA | NA | NA | NA |
| Gm5329 | 0 NA | NA | NA | NA | NA |
| Gm5334 | 0 NA | NA | NA | NA | NA |
| Gm5335 | 0 NA | NA | NA | NA | NA |
| Gm5338 | 0 NA | NA | NA | NA | NA |
| Gm5339 | 0 NA | NA | NA | NA | NA |
| Gm5341 | 0 NA | NA | NA | NA | NA |
| Gm5342 | 0 NA | NA | NA | NA | NA |
| Gm5347 | 0 NA | NA | NA | NA | NA |
| Gm5350 | 0 NA | NA | NA | NA | NA |
| Gm5354 | 0 NA | NA | NA | NA | NA |
| Gm5357 | 0 NA | NA | NA | NA | NA |
| Gm5358 | 0 NA | NA | NA | NA | NA |
| Gm5361 | 0 NA | NA | NA | NA | NA |
| Gm5363 | 0 NA | NA | NA | NA | NA |
| Gm5364 | 0 NA | NA | NA | NA | NA |

|        |      |    |    |    |    |
|--------|------|----|----|----|----|
| Gm5366 | 0 NA | NA | NA | NA | NA |
| Gm5368 | 0 NA | NA | NA | NA | NA |
| Gm5369 | 0 NA | NA | NA | NA | NA |
| Gm5370 | 0 NA | NA | NA | NA | NA |
| Gm5371 | 0 NA | NA | NA | NA | NA |
| Gm5379 | 0 NA | NA | NA | NA | NA |
| Gm5381 | 0 NA | NA | NA | NA | NA |
| Gm5383 | 0 NA | NA | NA | NA | NA |
| Gm5384 | 0 NA | NA | NA | NA | NA |
| Gm5386 | 0 NA | NA | NA | NA | NA |
| Gm5387 | 0 NA | NA | NA | NA | NA |
| Gm5390 | 0 NA | NA | NA | NA | NA |
| Gm5391 | 0 NA | NA | NA | NA | NA |
| Gm5392 | 0 NA | NA | NA | NA | NA |
| Gm5393 | 0 NA | NA | NA | NA | NA |
| Gm5394 | 0 NA | NA | NA | NA | NA |
| Gm5396 | 0 NA | NA | NA | NA | NA |
| Gm5397 | 0 NA | NA | NA | NA | NA |
| Gm5398 | 0 NA | NA | NA | NA | NA |
| Gm5400 | 0 NA | NA | NA | NA | NA |
| Gm5401 | 0 NA | NA | NA | NA | NA |
| Gm5402 | 0 NA | NA | NA | NA | NA |
| Gm5405 | 0 NA | NA | NA | NA | NA |
| Gm5407 | 0 NA | NA | NA | NA | NA |
| Gm5408 | 0 NA | NA | NA | NA | NA |
| Gm5409 | 0 NA | NA | NA | NA | NA |
| Gm5418 | 0 NA | NA | NA | NA | NA |
| Gm5419 | 0 NA | NA | NA | NA | NA |
| Gm5425 | 0 NA | NA | NA | NA | NA |
| Gm5426 | 0 NA | NA | NA | NA | NA |
| Gm5434 | 0 NA | NA | NA | NA | NA |
| Gm5442 | 0 NA | NA | NA | NA | NA |
| Gm5445 | 0 NA | NA | NA | NA | NA |
| Gm5446 | 0 NA | NA | NA | NA | NA |
| Gm5449 | 0 NA | NA | NA | NA | NA |
| Gm5452 | 0 NA | NA | NA | NA | NA |
| Gm5454 | 0 NA | NA | NA | NA | NA |
| Gm5455 | 0 NA | NA | NA | NA | NA |
| Gm5456 | 0 NA | NA | NA | NA | NA |
| Gm5458 | 0 NA | NA | NA | NA | NA |
| Gm5459 | 0 NA | NA | NA | NA | NA |
| Gm5461 | 0 NA | NA | NA | NA | NA |
| Gm5470 | 0 NA | NA | NA | NA | NA |
| Gm5472 | 0 NA | NA | NA | NA | NA |
| Gm5475 | 0 NA | NA | NA | NA | NA |
| Gm5476 | 0 NA | NA | NA | NA | NA |
| Gm5477 | 0 NA | NA | NA | NA | NA |
| Gm5478 | 0 NA | NA | NA | NA | NA |
| Gm5479 | 0 NA | NA | NA | NA | NA |
| Gm5499 | 0 NA | NA | NA | NA | NA |
| Gm5501 | 0 NA | NA | NA | NA | NA |
| Gm5510 | 0 NA | NA | NA | NA | NA |
| Gm5512 | 0 NA | NA | NA | NA | NA |
| Gm5514 | 0 NA | NA | NA | NA | NA |
| Gm5519 | 0 NA | NA | NA | NA | NA |
| Gm5542 | 0 NA | NA | NA | NA | NA |
| Gm5548 | 0 NA | NA | NA | NA | NA |
| Gm5550 | 0 NA | NA | NA | NA | NA |
| Gm5551 | 0 NA | NA | NA | NA | NA |
| Gm5552 | 0 NA | NA | NA | NA | NA |
| Gm5554 | 0 NA | NA | NA | NA | NA |
| Gm5561 | 0 NA | NA | NA | NA | NA |
| Gm5564 | 0 NA | NA | NA | NA | NA |
| Gm5565 | 0 NA | NA | NA | NA | NA |
| Gm5575 | 0 NA | NA | NA | NA | NA |
| Gm5578 | 0 NA | NA | NA | NA | NA |



|        |      |    |    |    |    |
|--------|------|----|----|----|----|
| Gm5583 | 0 NA | NA | NA | NA | NA |
| Gm5587 | 0 NA | NA | NA | NA | NA |
| Gm5591 | 0 NA | NA | NA | NA | NA |
| Gm5592 | 0 NA | NA | NA | NA | NA |
| Gm5594 | 0 NA | NA | NA | NA | NA |
| Gm5596 | 0 NA | NA | NA | NA | NA |
| Gm5597 | 0 NA | NA | NA | NA | NA |
| Gm5609 | 0 NA | NA | NA | NA | NA |
| Gm5611 | 0 NA | NA | NA | NA | NA |
| Gm5612 | 0 NA | NA | NA | NA | NA |
| Gm5614 | 0 NA | NA | NA | NA | NA |
| Gm5624 | 0 NA | NA | NA | NA | NA |
| Gm5630 | 0 NA | NA | NA | NA | NA |
| Gm5638 | 0 NA | NA | NA | NA | NA |
| Gm5639 | 0 NA | NA | NA | NA | NA |
| Gm5644 | 0 NA | NA | NA | NA | NA |
| Gm5645 | 0 NA | NA | NA | NA | NA |
| Gm5646 | 0 NA | NA | NA | NA | NA |
| Gm5648 | 0 NA | NA | NA | NA | NA |
| Gm5650 | 0 NA | NA | NA | NA | NA |
| Gm5652 | 0 NA | NA | NA | NA | NA |
| Gm5653 | 0 NA | NA | NA | NA | NA |
| Gm5656 | 0 NA | NA | NA | NA | NA |
| Gm5660 | 0 NA | NA | NA | NA | NA |
| Gm5664 | 0 NA | NA | NA | NA | NA |
| Gm5666 | 0 NA | NA | NA | NA | NA |
| Gm5667 | 0 NA | NA | NA | NA | NA |
| Gm5668 | 0 NA | NA | NA | NA | NA |
| Gm5670 | 0 NA | NA | NA | NA | NA |
| Gm5672 | 0 NA | NA | NA | NA | NA |
| Gm5673 | 0 NA | NA | NA | NA | NA |
| Gm5682 | 0 NA | NA | NA | NA | NA |
| Gm5684 | 0 NA | NA | NA | NA | NA |
| Gm5694 | 0 NA | NA | NA | NA | NA |
| Gm5696 | 0 NA | NA | NA | NA | NA |
| Gm5698 | 0 NA | NA | NA | NA | NA |
| Gm5702 | 0 NA | NA | NA | NA | NA |
| Gm5705 | 0 NA | NA | NA | NA | NA |
| Gm5706 | 0 NA | NA | NA | NA | NA |
| Gm5708 | 0 NA | NA | NA | NA | NA |
| Gm5709 | 0 NA | NA | NA | NA | NA |
| Gm5710 | 0 NA | NA | NA | NA | NA |
| Gm5711 | 0 NA | NA | NA | NA | NA |
| Gm5712 | 0 NA | NA | NA | NA | NA |
| Gm5723 | 0 NA | NA | NA | NA | NA |
| Gm5731 | 0 NA | NA | NA | NA | NA |
| Gm5732 | 0 NA | NA | NA | NA | NA |
| Gm5733 | 0 NA | NA | NA | NA | NA |
| Gm5734 | 0 NA | NA | NA | NA | NA |
| Gm5737 | 0 NA | NA | NA | NA | NA |
| Gm5738 | 0 NA | NA | NA | NA | NA |
| Gm5749 | 0 NA | NA | NA | NA | NA |
| Gm5750 | 0 NA | NA | NA | NA | NA |
| Gm5751 | 0 NA | NA | NA | NA | NA |
| Gm5752 | 0 NA | NA | NA | NA | NA |
| Gm5757 | 0 NA | NA | NA | NA | NA |
| Gm5759 | 0 NA | NA | NA | NA | NA |
| Gm5760 | 0 NA | NA | NA | NA | NA |
| Gm5761 | 0 NA | NA | NA | NA | NA |
| Gm5763 | 0 NA | NA | NA | NA | NA |
| Gm5771 | 0 NA | NA | NA | NA | NA |
| Gm5773 | 0 NA | NA | NA | NA | NA |
| Gm5776 | 0 NA | NA | NA | NA | NA |
| Gm5777 | 0 NA | NA | NA | NA | NA |
| Gm5779 | 0 NA | NA | NA | NA | NA |
| Gm5780 | 0 NA | NA | NA | NA | NA |

|        |      |    |    |    |    |
|--------|------|----|----|----|----|
| Gm5788 | 0 NA | NA | NA | NA | NA |
| Gm5789 | 0 NA | NA | NA | NA | NA |
| Gm5793 | 0 NA | NA | NA | NA | NA |
| Gm5795 | 0 NA | NA | NA | NA | NA |
| Gm5796 | 0 NA | NA | NA | NA | NA |
| Gm5797 | 0 NA | NA | NA | NA | NA |
| Gm5798 | 0 NA | NA | NA | NA | NA |
| Gm5799 | 0 NA | NA | NA | NA | NA |
| Gm5800 | 0 NA | NA | NA | NA | NA |
| Gm5809 | 0 NA | NA | NA | NA | NA |
| Gm5812 | 0 NA | NA | NA | NA | NA |
| Gm5814 | 0 NA | NA | NA | NA | NA |
| Gm5815 | 0 NA | NA | NA | NA | NA |
| Gm5830 | 0 NA | NA | NA | NA | NA |
| Gm5831 | 0 NA | NA | NA | NA | NA |
| Gm5832 | 0 NA | NA | NA | NA | NA |
| Gm5839 | 0 NA | NA | NA | NA | NA |
| Gm5843 | 0 NA | NA | NA | NA | NA |
| Gm5847 | 0 NA | NA | NA | NA | NA |
| Gm5849 | 0 NA | NA | NA | NA | NA |
| Gm5852 | 0 NA | NA | NA | NA | NA |
| Gm5863 | 0 NA | NA | NA | NA | NA |
| Gm5866 | 0 NA | NA | NA | NA | NA |
| Gm5867 | 0 NA | NA | NA | NA | NA |
| Gm5870 | 0 NA | NA | NA | NA | NA |
| Gm5871 | 0 NA | NA | NA | NA | NA |
| Gm5874 | 0 NA | NA | NA | NA | NA |
| Gm5878 | 0 NA | NA | NA | NA | NA |
| Gm5881 | 0 NA | NA | NA | NA | NA |
| Gm5884 | 0 NA | NA | NA | NA | NA |
| Gm5885 | 0 NA | NA | NA | NA | NA |
| Gm5896 | 0 NA | NA | NA | NA | NA |
| Gm5899 | 0 NA | NA | NA | NA | NA |
| Gm5900 | 0 NA | NA | NA | NA | NA |
| Gm5901 | 0 NA | NA | NA | NA | NA |
| Gm5903 | 0 NA | NA | NA | NA | NA |
| Gm5904 | 0 NA | NA | NA | NA | NA |
| Gm5910 | 0 NA | NA | NA | NA | NA |
| Gm5912 | 0 NA | NA | NA | NA | NA |
| Gm5913 | 0 NA | NA | NA | NA | NA |
| Gm5916 | 0 NA | NA | NA | NA | NA |
| Gm5920 | 0 NA | NA | NA | NA | NA |
| Gm5923 | 0 NA | NA | NA | NA | NA |
| Gm5924 | 0 NA | NA | NA | NA | NA |
| Gm5925 | 0 NA | NA | NA | NA | NA |
| Gm5926 | 0 NA | NA | NA | NA | NA |
| Gm5928 | 0 NA | NA | NA | NA | NA |
| Gm5929 | 0 NA | NA | NA | NA | NA |
| Gm5930 | 0 NA | NA | NA | NA | NA |
| Gm5931 | 0 NA | NA | NA | NA | NA |
| Gm5935 | 0 NA | NA | NA | NA | NA |
| Gm5937 | 0 NA | NA | NA | NA | NA |
| Gm5938 | 0 NA | NA | NA | NA | NA |
| Gm5941 | 0 NA | NA | NA | NA | NA |
| Gm5942 | 0 NA | NA | NA | NA | NA |
| Gm5943 | 0 NA | NA | NA | NA | NA |
| Gm5944 | 0 NA | NA | NA | NA | NA |
| Gm5947 | 0 NA | NA | NA | NA | NA |
| Gm5949 | 0 NA | NA | NA | NA | NA |
| Gm5954 | 0 NA | NA | NA | NA | NA |
| Gm5955 | 0 NA | NA | NA | NA | NA |
| Gm5958 | 0 NA | NA | NA | NA | NA |
| Gm5963 | 0 NA | NA | NA | NA | NA |
| Gm5965 | 0 NA | NA | NA | NA | NA |
| Gm597  | 0 NA | NA | NA | NA | NA |
| Gm5973 | 0 NA | NA | NA | NA | NA |

|        |      |    |    |    |    |
|--------|------|----|----|----|----|
| Gm5974 | 0 NA | NA | NA | NA | NA |
| Gm5975 | 0 NA | NA | NA | NA | NA |
| Gm5976 | 0 NA | NA | NA | NA | NA |
| Gm5979 | 0 NA | NA | NA | NA | NA |
| Gm5981 | 0 NA | NA | NA | NA | NA |
| Gm5982 | 0 NA | NA | NA | NA | NA |
| Gm5987 | 0 NA | NA | NA | NA | NA |
| Gm5989 | 0 NA | NA | NA | NA | NA |
| Gm5990 | 0 NA | NA | NA | NA | NA |
| Gm5995 | 0 NA | NA | NA | NA | NA |
| Gm5996 | 0 NA | NA | NA | NA | NA |
| Gm5997 | 0 NA | NA | NA | NA | NA |
| Gm6003 | 0 NA | NA | NA | NA | NA |
| Gm6004 | 0 NA | NA | NA | NA | NA |
| Gm6007 | 0 NA | NA | NA | NA | NA |
| Gm6008 | 0 NA | NA | NA | NA | NA |
| Gm6009 | 0 NA | NA | NA | NA | NA |
| Gm6011 | 0 NA | NA | NA | NA | NA |
| Gm6013 | 0 NA | NA | NA | NA | NA |
| Gm6015 | 0 NA | NA | NA | NA | NA |
| Gm6018 | 0 NA | NA | NA | NA | NA |
| Gm6020 | 0 NA | NA | NA | NA | NA |
| Gm6024 | 0 NA | NA | NA | NA | NA |
| Gm6025 | 0 NA | NA | NA | NA | NA |
| Gm6027 | 0 NA | NA | NA | NA | NA |
| Gm6031 | 0 NA | NA | NA | NA | NA |
| Gm6035 | 0 NA | NA | NA | NA | NA |
| Gm6038 | 0 NA | NA | NA | NA | NA |
| Gm6039 | 0 NA | NA | NA | NA | NA |
| Gm6040 | 0 NA | NA | NA | NA | NA |
| Gm6047 | 0 NA | NA | NA | NA | NA |
| Gm6049 | 0 NA | NA | NA | NA | NA |
| Gm6051 | 0 NA | NA | NA | NA | NA |
| Gm6056 | 0 NA | NA | NA | NA | NA |
| Gm6057 | 0 NA | NA | NA | NA | NA |
| Gm6059 | 0 NA | NA | NA | NA | NA |
| Gm6064 | 0 NA | NA | NA | NA | NA |
| Gm6066 | 0 NA | NA | NA | NA | NA |
| Gm6067 | 0 NA | NA | NA | NA | NA |
| Gm6070 | 0 NA | NA | NA | NA | NA |
| Gm6072 | 0 NA | NA | NA | NA | NA |
| Gm6073 | 0 NA | NA | NA | NA | NA |
| Gm6074 | 0 NA | NA | NA | NA | NA |
| Gm6075 | 0 NA | NA | NA | NA | NA |
| Gm6077 | 0 NA | NA | NA | NA | NA |
| Gm6082 | 0 NA | NA | NA | NA | NA |
| Gm6083 | 0 NA | NA | NA | NA | NA |
| Gm6087 | 0 NA | NA | NA | NA | NA |
| Gm6088 | 0 NA | NA | NA | NA | NA |
| Gm6091 | 0 NA | NA | NA | NA | NA |
| Gm6096 | 0 NA | NA | NA | NA | NA |
| Gm6098 | 0 NA | NA | NA | NA | NA |
| Gm6100 | 0 NA | NA | NA | NA | NA |
| Gm6101 | 0 NA | NA | NA | NA | NA |
| Gm6104 | 0 NA | NA | NA | NA | NA |
| Gm6105 | 0 NA | NA | NA | NA | NA |
| Gm6109 | 0 NA | NA | NA | NA | NA |
| Gm6112 | 0 NA | NA | NA | NA | NA |
| Gm6113 | 0 NA | NA | NA | NA | NA |
| Gm6114 | 0 NA | NA | NA | NA | NA |
| Gm6121 | 0 NA | NA | NA | NA | NA |
| Gm6122 | 0 NA | NA | NA | NA | NA |
| Gm6124 | 0 NA | NA | NA | NA | NA |
| Gm6125 | 0 NA | NA | NA | NA | NA |
| Gm6128 | 0 NA | NA | NA | NA | NA |
| Gm6129 | 0 NA | NA | NA | NA | NA |

|        |      |    |    |    |    |
|--------|------|----|----|----|----|
| Gm6134 | 0 NA | NA | NA | NA | NA |
| Gm6137 | 0 NA | NA | NA | NA | NA |
| Gm6140 | 0 NA | NA | NA | NA | NA |
| Gm6141 | 0 NA | NA | NA | NA | NA |
| Gm6152 | 0 NA | NA | NA | NA | NA |
| Gm6157 | 0 NA | NA | NA | NA | NA |
| Gm6159 | 0 NA | NA | NA | NA | NA |
| Gm6162 | 0 NA | NA | NA | NA | NA |
| Gm6171 | 0 NA | NA | NA | NA | NA |
| Gm6175 | 0 NA | NA | NA | NA | NA |
| Gm6177 | 0 NA | NA | NA | NA | NA |
| Gm6181 | 0 NA | NA | NA | NA | NA |
| Gm6182 | 0 NA | NA | NA | NA | NA |
| Gm6185 | 0 NA | NA | NA | NA | NA |
| Gm6197 | 0 NA | NA | NA | NA | NA |
| Gm6200 | 0 NA | NA | NA | NA | NA |
| Gm6203 | 0 NA | NA | NA | NA | NA |
| Gm6204 | 0 NA | NA | NA | NA | NA |
| Gm6205 | 0 NA | NA | NA | NA | NA |
| Gm6207 | 0 NA | NA | NA | NA | NA |
| Gm6212 | 0 NA | NA | NA | NA | NA |
| Gm6215 | 0 NA | NA | NA | NA | NA |
| Gm6216 | 0 NA | NA | NA | NA | NA |
| Gm6221 | 0 NA | NA | NA | NA | NA |
| Gm6226 | 0 NA | NA | NA | NA | NA |
| Gm6227 | 0 NA | NA | NA | NA | NA |
| Gm6228 | 0 NA | NA | NA | NA | NA |
| Gm6230 | 0 NA | NA | NA | NA | NA |
| Gm6236 | 0 NA | NA | NA | NA | NA |
| Gm6244 | 0 NA | NA | NA | NA | NA |
| Gm6261 | 0 NA | NA | NA | NA | NA |
| Gm6268 | 0 NA | NA | NA | NA | NA |
| Gm6272 | 0 NA | NA | NA | NA | NA |
| Gm6275 | 0 NA | NA | NA | NA | NA |
| Gm6276 | 0 NA | NA | NA | NA | NA |
| Gm6285 | 0 NA | NA | NA | NA | NA |
| Gm6290 | 0 NA | NA | NA | NA | NA |
| Gm6291 | 0 NA | NA | NA | NA | NA |
| Gm6293 | 0 NA | NA | NA | NA | NA |
| Gm6298 | 0 NA | NA | NA | NA | NA |
| Gm6300 | 0 NA | NA | NA | NA | NA |
| Gm6303 | 0 NA | NA | NA | NA | NA |
| Gm6309 | 0 NA | NA | NA | NA | NA |
| Gm6312 | 0 NA | NA | NA | NA | NA |
| Gm6317 | 0 NA | NA | NA | NA | NA |
| Gm6321 | 0 NA | NA | NA | NA | NA |
| Gm6322 | 0 NA | NA | NA | NA | NA |
| Gm6325 | 0 NA | NA | NA | NA | NA |
| Gm6327 | 0 NA | NA | NA | NA | NA |
| Gm6331 | 0 NA | NA | NA | NA | NA |
| Gm6332 | 0 NA | NA | NA | NA | NA |
| Gm6334 | 0 NA | NA | NA | NA | NA |
| Gm6337 | 0 NA | NA | NA | NA | NA |
| Gm6340 | 0 NA | NA | NA | NA | NA |
| Gm6342 | 0 NA | NA | NA | NA | NA |
| Gm6343 | 0 NA | NA | NA | NA | NA |
| Gm6346 | 0 NA | NA | NA | NA | NA |
| Gm6348 | 0 NA | NA | NA | NA | NA |
| Gm6350 | 0 NA | NA | NA | NA | NA |
| Gm6352 | 0 NA | NA | NA | NA | NA |
| Gm6353 | 0 NA | NA | NA | NA | NA |
| Gm6356 | 0 NA | NA | NA | NA | NA |
| Gm6358 | 0 NA | NA | NA | NA | NA |
| Gm6362 | 0 NA | NA | NA | NA | NA |
| Gm6365 | 0 NA | NA | NA | NA | NA |
| Gm6366 | 0 NA | NA | NA | NA | NA |

|        |      |    |    |    |    |
|--------|------|----|----|----|----|
| Gm6369 | 0 NA | NA | NA | NA | NA |
| Gm6370 | 0 NA | NA | NA | NA | NA |
| Gm6373 | 0 NA | NA | NA | NA | NA |
| Gm6374 | 0 NA | NA | NA | NA | NA |
| Gm6375 | 0 NA | NA | NA | NA | NA |
| Gm6376 | 0 NA | NA | NA | NA | NA |
| Gm6378 | 0 NA | NA | NA | NA | NA |
| Gm6401 | 0 NA | NA | NA | NA | NA |
| Gm6407 | 0 NA | NA | NA | NA | NA |
| Gm6408 | 0 NA | NA | NA | NA | NA |
| Gm6411 | 0 NA | NA | NA | NA | NA |
| Gm6419 | 0 NA | NA | NA | NA | NA |
| Gm6421 | 0 NA | NA | NA | NA | NA |
| Gm6423 | 0 NA | NA | NA | NA | NA |
| Gm6425 | 0 NA | NA | NA | NA | NA |
| Gm6426 | 0 NA | NA | NA | NA | NA |
| Gm6427 | 0 NA | NA | NA | NA | NA |
| Gm6428 | 0 NA | NA | NA | NA | NA |
| Gm6429 | 0 NA | NA | NA | NA | NA |
| Gm6436 | 0 NA | NA | NA | NA | NA |
| Gm6439 | 0 NA | NA | NA | NA | NA |
| Gm6441 | 0 NA | NA | NA | NA | NA |
| Gm6445 | 0 NA | NA | NA | NA | NA |
| Gm6446 | 0 NA | NA | NA | NA | NA |
| Gm6447 | 0 NA | NA | NA | NA | NA |
| Gm6458 | 0 NA | NA | NA | NA | NA |
| Gm6460 | 0 NA | NA | NA | NA | NA |
| Gm6462 | 0 NA | NA | NA | NA | NA |
| Gm6463 | 0 NA | NA | NA | NA | NA |
| Gm6465 | 0 NA | NA | NA | NA | NA |
| Gm6478 | 0 NA | NA | NA | NA | NA |
| Gm6479 | 0 NA | NA | NA | NA | NA |
| Gm6482 | 0 NA | NA | NA | NA | NA |
| Gm6489 | 0 NA | NA | NA | NA | NA |
| Gm649  | 0 NA | NA | NA | NA | NA |
| Gm6490 | 0 NA | NA | NA | NA | NA |
| Gm6491 | 0 NA | NA | NA | NA | NA |
| Gm650  | 0 NA | NA | NA | NA | NA |
| Gm6506 | 0 NA | NA | NA | NA | NA |
| Gm6518 | 0 NA | NA | NA | NA | NA |
| Gm6522 | 0 NA | NA | NA | NA | NA |
| Gm6526 | 0 NA | NA | NA | NA | NA |
| Gm6536 | 0 NA | NA | NA | NA | NA |
| Gm6539 | 0 NA | NA | NA | NA | NA |
| Gm6541 | 0 NA | NA | NA | NA | NA |
| Gm6546 | 0 NA | NA | NA | NA | NA |
| Gm6550 | 0 NA | NA | NA | NA | NA |
| Gm6554 | 0 NA | NA | NA | NA | NA |
| Gm6558 | 0 NA | NA | NA | NA | NA |
| Gm6562 | 0 NA | NA | NA | NA | NA |
| Gm6563 | 0 NA | NA | NA | NA | NA |
| Gm6568 | 0 NA | NA | NA | NA | NA |
| Gm6574 | 0 NA | NA | NA | NA | NA |
| Gm6575 | 0 NA | NA | NA | NA | NA |
| Gm6578 | 0 NA | NA | NA | NA | NA |
| Gm6579 | 0 NA | NA | NA | NA | NA |
| Gm6581 | 0 NA | NA | NA | NA | NA |
| Gm6584 | 0 NA | NA | NA | NA | NA |
| Gm6586 | 0 NA | NA | NA | NA | NA |
| Gm6587 | 0 NA | NA | NA | NA | NA |
| Gm6588 | 0 NA | NA | NA | NA | NA |
| Gm6590 | 0 NA | NA | NA | NA | NA |
| Gm6591 | 0 NA | NA | NA | NA | NA |
| Gm6593 | 0 NA | NA | NA | NA | NA |
| Gm6594 | 0 NA | NA | NA | NA | NA |
| Gm6605 | 0 NA | NA | NA | NA | NA |

|        |      |    |    |    |    |
|--------|------|----|----|----|----|
| Gm6615 | 0 NA | NA | NA | NA | NA |
| Gm6619 | 0 NA | NA | NA | NA | NA |
| Gm6620 | 0 NA | NA | NA | NA | NA |
| Gm6621 | 0 NA | NA | NA | NA | NA |
| Gm6625 | 0 NA | NA | NA | NA | NA |
| Gm6631 | 0 NA | NA | NA | NA | NA |
| Gm6632 | 0 NA | NA | NA | NA | NA |
| Gm6633 | 0 NA | NA | NA | NA | NA |
| Gm6640 | 0 NA | NA | NA | NA | NA |
| Gm6644 | 0 NA | NA | NA | NA | NA |
| Gm6647 | 0 NA | NA | NA | NA | NA |
| Gm6651 | 0 NA | NA | NA | NA | NA |
| Gm6655 | 0 NA | NA | NA | NA | NA |
| Gm6659 | 0 NA | NA | NA | NA | NA |
| Gm6660 | 0 NA | NA | NA | NA | NA |
| Gm6664 | 0 NA | NA | NA | NA | NA |
| Gm6665 | 0 NA | NA | NA | NA | NA |
| Gm6667 | 0 NA | NA | NA | NA | NA |
| Gm6673 | 0 NA | NA | NA | NA | NA |
| Gm6676 | 0 NA | NA | NA | NA | NA |
| Gm6679 | 0 NA | NA | NA | NA | NA |
| Gm6681 | 0 NA | NA | NA | NA | NA |
| Gm6684 | 0 NA | NA | NA | NA | NA |
| Gm6685 | 0 NA | NA | NA | NA | NA |
| Gm6689 | 0 NA | NA | NA | NA | NA |
| Gm6693 | 0 NA | NA | NA | NA | NA |
| Gm6695 | 0 NA | NA | NA | NA | NA |
| Gm6702 | 0 NA | NA | NA | NA | NA |
| Gm6706 | 0 NA | NA | NA | NA | NA |
| Gm6713 | 0 NA | NA | NA | NA | NA |
| Gm6714 | 0 NA | NA | NA | NA | NA |
| Gm6717 | 0 NA | NA | NA | NA | NA |
| Gm6719 | 0 NA | NA | NA | NA | NA |
| Gm6721 | 0 NA | NA | NA | NA | NA |
| Gm6726 | 0 NA | NA | NA | NA | NA |
| Gm6727 | 0 NA | NA | NA | NA | NA |
| Gm6728 | 0 NA | NA | NA | NA | NA |
| Gm6729 | 0 NA | NA | NA | NA | NA |
| Gm6734 | 0 NA | NA | NA | NA | NA |
| Gm6736 | 0 NA | NA | NA | NA | NA |
| Gm6740 | 0 NA | NA | NA | NA | NA |
| Gm6743 | 0 NA | NA | NA | NA | NA |
| Gm6744 | 0 NA | NA | NA | NA | NA |
| Gm6745 | 0 NA | NA | NA | NA | NA |
| Gm6746 | 0 NA | NA | NA | NA | NA |
| Gm6750 | 0 NA | NA | NA | NA | NA |
| Gm6755 | 0 NA | NA | NA | NA | NA |
| Gm6756 | 0 NA | NA | NA | NA | NA |
| Gm6757 | 0 NA | NA | NA | NA | NA |
| Gm6758 | 0 NA | NA | NA | NA | NA |
| Gm6760 | 0 NA | NA | NA | NA | NA |
| Gm6762 | 0 NA | NA | NA | NA | NA |
| Gm6773 | 0 NA | NA | NA | NA | NA |
| Gm6776 | 0 NA | NA | NA | NA | NA |
| Gm6783 | 0 NA | NA | NA | NA | NA |
| Gm6785 | 0 NA | NA | NA | NA | NA |
| Gm6786 | 0 NA | NA | NA | NA | NA |
| Gm6788 | 0 NA | NA | NA | NA | NA |
| Gm6797 | 0 NA | NA | NA | NA | NA |
| Gm6798 | 0 NA | NA | NA | NA | NA |
| Gm6799 | 0 NA | NA | NA | NA | NA |
| Gm6801 | 0 NA | NA | NA | NA | NA |
| Gm6806 | 0 NA | NA | NA | NA | NA |
| Gm6812 | 0 NA | NA | NA | NA | NA |
| Gm6818 | 0 NA | NA | NA | NA | NA |
| Gm6819 | 0 NA | NA | NA | NA | NA |

|        |      |    |    |    |    |
|--------|------|----|----|----|----|
| Gm6820 | 0 NA | NA | NA | NA | NA |
| Gm6821 | 0 NA | NA | NA | NA | NA |
| Gm6822 | 0 NA | NA | NA | NA | NA |
| Gm6823 | 0 NA | NA | NA | NA | NA |
| Gm6838 | 0 NA | NA | NA | NA | NA |
| Gm6841 | 0 NA | NA | NA | NA | NA |
| Gm6842 | 0 NA | NA | NA | NA | NA |
| Gm6847 | 0 NA | NA | NA | NA | NA |
| Gm6850 | 0 NA | NA | NA | NA | NA |
| Gm6852 | 0 NA | NA | NA | NA | NA |
| Gm6855 | 0 NA | NA | NA | NA | NA |
| Gm6858 | 0 NA | NA | NA | NA | NA |
| Gm6859 | 0 NA | NA | NA | NA | NA |
| Gm6866 | 0 NA | NA | NA | NA | NA |
| Gm6867 | 0 NA | NA | NA | NA | NA |
| Gm6869 | 0 NA | NA | NA | NA | NA |
| Gm6872 | 0 NA | NA | NA | NA | NA |
| Gm6884 | 0 NA | NA | NA | NA | NA |
| Gm6887 | 0 NA | NA | NA | NA | NA |
| Gm6888 | 0 NA | NA | NA | NA | NA |
| Gm6893 | 0 NA | NA | NA | NA | NA |
| Gm6897 | 0 NA | NA | NA | NA | NA |
| Gm6899 | 0 NA | NA | NA | NA | NA |
| Gm6903 | 0 NA | NA | NA | NA | NA |
| Gm6909 | 0 NA | NA | NA | NA | NA |
| Gm6913 | 0 NA | NA | NA | NA | NA |
| Gm6918 | 0 NA | NA | NA | NA | NA |
| Gm6919 | 0 NA | NA | NA | NA | NA |
| Gm6921 | 0 NA | NA | NA | NA | NA |
| Gm6923 | 0 NA | NA | NA | NA | NA |
| Gm6929 | 0 NA | NA | NA | NA | NA |
| Gm6931 | 0 NA | NA | NA | NA | NA |
| Gm6943 | 0 NA | NA | NA | NA | NA |
| Gm6944 | 0 NA | NA | NA | NA | NA |
| Gm6947 | 0 NA | NA | NA | NA | NA |
| Gm6952 | 0 NA | NA | NA | NA | NA |
| Gm6954 | 0 NA | NA | NA | NA | NA |
| Gm6956 | 0 NA | NA | NA | NA | NA |
| Gm6960 | 0 NA | NA | NA | NA | NA |
| Gm6963 | 0 NA | NA | NA | NA | NA |
| Gm6964 | 0 NA | NA | NA | NA | NA |
| Gm6973 | 0 NA | NA | NA | NA | NA |
| Gm6979 | 0 NA | NA | NA | NA | NA |
| Gm6985 | 0 NA | NA | NA | NA | NA |
| Gm6987 | 0 NA | NA | NA | NA | NA |
| Gm6989 | 0 NA | NA | NA | NA | NA |
| Gm6991 | 0 NA | NA | NA | NA | NA |
| Gm6993 | 0 NA | NA | NA | NA | NA |
| Gm7003 | 0 NA | NA | NA | NA | NA |
| Gm7004 | 0 NA | NA | NA | NA | NA |
| Gm7023 | 0 NA | NA | NA | NA | NA |
| Gm7031 | 0 NA | NA | NA | NA | NA |
| Gm7034 | 0 NA | NA | NA | NA | NA |
| Gm7039 | 0 NA | NA | NA | NA | NA |
| Gm7040 | 0 NA | NA | NA | NA | NA |
| Gm7041 | 0 NA | NA | NA | NA | NA |
| Gm7047 | 0 NA | NA | NA | NA | NA |
| Gm7048 | 0 NA | NA | NA | NA | NA |
| Gm7052 | 0 NA | NA | NA | NA | NA |
| Gm7054 | 0 NA | NA | NA | NA | NA |
| Gm7058 | 0 NA | NA | NA | NA | NA |
| Gm7063 | 0 NA | NA | NA | NA | NA |
| Gm7071 | 0 NA | NA | NA | NA | NA |
| Gm7073 | 0 NA | NA | NA | NA | NA |
| Gm7076 | 0 NA | NA | NA | NA | NA |
| Gm7079 | 0 NA | NA | NA | NA | NA |

|        |      |    |    |    |    |
|--------|------|----|----|----|----|
| Gm7082 | 0 NA | NA | NA | NA | NA |
| Gm7083 | 0 NA | NA | NA | NA | NA |
| Gm7084 | 0 NA | NA | NA | NA | NA |
| Gm7089 | 0 NA | NA | NA | NA | NA |
| Gm7091 | 0 NA | NA | NA | NA | NA |
| Gm7093 | 0 NA | NA | NA | NA | NA |
| Gm7094 | 0 NA | NA | NA | NA | NA |
| Gm7099 | 0 NA | NA | NA | NA | NA |
| Gm7103 | 0 NA | NA | NA | NA | NA |
| Gm7104 | 0 NA | NA | NA | NA | NA |
| Gm7106 | 0 NA | NA | NA | NA | NA |
| Gm7107 | 0 NA | NA | NA | NA | NA |
| Gm7108 | 0 NA | NA | NA | NA | NA |
| Gm7113 | 0 NA | NA | NA | NA | NA |
| Gm7115 | 0 NA | NA | NA | NA | NA |
| Gm7119 | 0 NA | NA | NA | NA | NA |
| Gm7123 | 0 NA | NA | NA | NA | NA |
| Gm7126 | 0 NA | NA | NA | NA | NA |
| Gm7128 | 0 NA | NA | NA | NA | NA |
| Gm7132 | 0 NA | NA | NA | NA | NA |
| Gm7133 | 0 NA | NA | NA | NA | NA |
| Gm7134 | 0 NA | NA | NA | NA | NA |
| Gm7135 | 0 NA | NA | NA | NA | NA |
| Gm7137 | 0 NA | NA | NA | NA | NA |
| Gm7138 | 0 NA | NA | NA | NA | NA |
| Gm7142 | 0 NA | NA | NA | NA | NA |
| Gm7145 | 0 NA | NA | NA | NA | NA |
| Gm7150 | 0 NA | NA | NA | NA | NA |
| Gm7151 | 0 NA | NA | NA | NA | NA |
| Gm7152 | 0 NA | NA | NA | NA | NA |
| Gm7153 | 0 NA | NA | NA | NA | NA |
| Gm7155 | 0 NA | NA | NA | NA | NA |
| Gm7158 | 0 NA | NA | NA | NA | NA |
| Gm7162 | 0 NA | NA | NA | NA | NA |
| Gm7164 | 0 NA | NA | NA | NA | NA |
| Gm7166 | 0 NA | NA | NA | NA | NA |
| Gm7167 | 0 NA | NA | NA | NA | NA |
| Gm7171 | 0 NA | NA | NA | NA | NA |
| Gm7181 | 0 NA | NA | NA | NA | NA |
| Gm7183 | 0 NA | NA | NA | NA | NA |
| Gm7189 | 0 NA | NA | NA | NA | NA |
| Gm7190 | 0 NA | NA | NA | NA | NA |
| Gm7192 | 0 NA | NA | NA | NA | NA |
| Gm7195 | 0 NA | NA | NA | NA | NA |
| Gm7200 | 0 NA | NA | NA | NA | NA |
| Gm7201 | 0 NA | NA | NA | NA | NA |
| Gm7203 | 0 NA | NA | NA | NA | NA |
| Gm7205 | 0 NA | NA | NA | NA | NA |
| Gm7207 | 0 NA | NA | NA | NA | NA |
| Gm7209 | 0 NA | NA | NA | NA | NA |
| Gm7210 | 0 NA | NA | NA | NA | NA |
| Gm7211 | 0 NA | NA | NA | NA | NA |
| Gm7212 | 0 NA | NA | NA | NA | NA |
| Gm7213 | 0 NA | NA | NA | NA | NA |
| Gm7214 | 0 NA | NA | NA | NA | NA |
| Gm7224 | 0 NA | NA | NA | NA | NA |
| Gm7229 | 0 NA | NA | NA | NA | NA |
| Gm7230 | 0 NA | NA | NA | NA | NA |
| Gm7233 | 0 NA | NA | NA | NA | NA |
| Gm7242 | 0 NA | NA | NA | NA | NA |
| Gm7244 | 0 NA | NA | NA | NA | NA |
| Gm7247 | 0 NA | NA | NA | NA | NA |
| Gm7252 | 0 NA | NA | NA | NA | NA |
| Gm7255 | 0 NA | NA | NA | NA | NA |
| Gm7258 | 0 NA | NA | NA | NA | NA |
| Gm7260 | 0 NA | NA | NA | NA | NA |



|        |      |    |    |    |    |
|--------|------|----|----|----|----|
| Gm7266 | 0 NA | NA | NA | NA | NA |
| Gm7270 | 0 NA | NA | NA | NA | NA |
| Gm7271 | 0 NA | NA | NA | NA | NA |
| Gm7272 | 0 NA | NA | NA | NA | NA |
| Gm7275 | 0 NA | NA | NA | NA | NA |
| Gm7276 | 0 NA | NA | NA | NA | NA |
| Gm7281 | 0 NA | NA | NA | NA | NA |
| Gm7286 | 0 NA | NA | NA | NA | NA |
| Gm7290 | 0 NA | NA | NA | NA | NA |
| Gm7291 | 0 NA | NA | NA | NA | NA |
| Gm7313 | 0 NA | NA | NA | NA | NA |
| Gm7316 | 0 NA | NA | NA | NA | NA |
| Gm7319 | 0 NA | NA | NA | NA | NA |
| Gm732  | 0 NA | NA | NA | NA | NA |
| Gm7324 | 0 NA | NA | NA | NA | NA |
| Gm7328 | 0 NA | NA | NA | NA | NA |
| Gm7333 | 0 NA | NA | NA | NA | NA |
| Gm7335 | 0 NA | NA | NA | NA | NA |
| Gm7340 | 0 NA | NA | NA | NA | NA |
| Gm7341 | 0 NA | NA | NA | NA | NA |
| Gm7343 | 0 NA | NA | NA | NA | NA |
| Gm7344 | 0 NA | NA | NA | NA | NA |
| Gm7346 | 0 NA | NA | NA | NA | NA |
| Gm7347 | 0 NA | NA | NA | NA | NA |
| Gm7350 | 0 NA | NA | NA | NA | NA |
| Gm7352 | 0 NA | NA | NA | NA | NA |
| Gm7353 | 0 NA | NA | NA | NA | NA |
| Gm7356 | 0 NA | NA | NA | NA | NA |
| Gm7358 | 0 NA | NA | NA | NA | NA |
| Gm7363 | 0 NA | NA | NA | NA | NA |
| Gm7364 | 0 NA | NA | NA | NA | NA |
| Gm7365 | 0 NA | NA | NA | NA | NA |
| Gm7368 | 0 NA | NA | NA | NA | NA |
| Gm7369 | 0 NA | NA | NA | NA | NA |
| Gm7371 | 0 NA | NA | NA | NA | NA |
| Gm7375 | 0 NA | NA | NA | NA | NA |
| Gm7380 | 0 NA | NA | NA | NA | NA |
| Gm7381 | 0 NA | NA | NA | NA | NA |
| Gm7386 | 0 NA | NA | NA | NA | NA |
| Gm7390 | 0 NA | NA | NA | NA | NA |
| Gm7391 | 0 NA | NA | NA | NA | NA |
| Gm7392 | 0 NA | NA | NA | NA | NA |
| Gm7393 | 0 NA | NA | NA | NA | NA |
| Gm7394 | 0 NA | NA | NA | NA | NA |
| Gm7395 | 0 NA | NA | NA | NA | NA |
| Gm7398 | 0 NA | NA | NA | NA | NA |
| Gm7405 | 0 NA | NA | NA | NA | NA |
| Gm7407 | 0 NA | NA | NA | NA | NA |
| Gm7408 | 0 NA | NA | NA | NA | NA |
| Gm7415 | 0 NA | NA | NA | NA | NA |
| Gm7416 | 0 NA | NA | NA | NA | NA |
| Gm7417 | 0 NA | NA | NA | NA | NA |
| Gm7419 | 0 NA | NA | NA | NA | NA |
| Gm7421 | 0 NA | NA | NA | NA | NA |
| Gm7422 | 0 NA | NA | NA | NA | NA |
| Gm7426 | 0 NA | NA | NA | NA | NA |
| Gm7430 | 0 NA | NA | NA | NA | NA |
| Gm7436 | 0 NA | NA | NA | NA | NA |
| Gm7438 | 0 NA | NA | NA | NA | NA |
| Gm7439 | 0 NA | NA | NA | NA | NA |
| Gm7442 | 0 NA | NA | NA | NA | NA |
| Gm7444 | 0 NA | NA | NA | NA | NA |
| Gm7445 | 0 NA | NA | NA | NA | NA |
| Gm7449 | 0 NA | NA | NA | NA | NA |
| Gm7452 | 0 NA | NA | NA | NA | NA |
| Gm7456 | 0 NA | NA | NA | NA | NA |

|        |      |    |    |    |    |
|--------|------|----|----|----|----|
| Gm7470 | 0 NA | NA | NA | NA | NA |
| Gm7473 | 0 NA | NA | NA | NA | NA |
| Gm7478 | 0 NA | NA | NA | NA | NA |
| Gm7481 | 0 NA | NA | NA | NA | NA |
| Gm7485 | 0 NA | NA | NA | NA | NA |
| Gm7489 | 0 NA | NA | NA | NA | NA |
| Gm7494 | 0 NA | NA | NA | NA | NA |
| Gm7495 | 0 NA | NA | NA | NA | NA |
| Gm7498 | 0 NA | NA | NA | NA | NA |
| Gm7499 | 0 NA | NA | NA | NA | NA |
| Gm7504 | 0 NA | NA | NA | NA | NA |
| Gm7506 | 0 NA | NA | NA | NA | NA |
| Gm7507 | 0 NA | NA | NA | NA | NA |
| Gm7508 | 0 NA | NA | NA | NA | NA |
| Gm7512 | 0 NA | NA | NA | NA | NA |
| Gm7514 | 0 NA | NA | NA | NA | NA |
| Gm7525 | 0 NA | NA | NA | NA | NA |
| Gm7530 | 0 NA | NA | NA | NA | NA |
| Gm7535 | 0 NA | NA | NA | NA | NA |
| Gm7539 | 0 NA | NA | NA | NA | NA |
| Gm7540 | 0 NA | NA | NA | NA | NA |
| Gm7543 | 0 NA | NA | NA | NA | NA |
| Gm7544 | 0 NA | NA | NA | NA | NA |
| Gm7545 | 0 NA | NA | NA | NA | NA |
| Gm7546 | 0 NA | NA | NA | NA | NA |
| Gm7551 | 0 NA | NA | NA | NA | NA |
| Gm7556 | 0 NA | NA | NA | NA | NA |
| Gm7557 | 0 NA | NA | NA | NA | NA |
| Gm7566 | 0 NA | NA | NA | NA | NA |
| Gm7570 | 0 NA | NA | NA | NA | NA |
| Gm7572 | 0 NA | NA | NA | NA | NA |
| Gm7579 | 0 NA | NA | NA | NA | NA |
| Gm7583 | 0 NA | NA | NA | NA | NA |
| Gm7584 | 0 NA | NA | NA | NA | NA |
| Gm7587 | 0 NA | NA | NA | NA | NA |
| Gm7594 | 0 NA | NA | NA | NA | NA |
| Gm7604 | 0 NA | NA | NA | NA | NA |
| Gm7611 | 0 NA | NA | NA | NA | NA |
| Gm7613 | 0 NA | NA | NA | NA | NA |
| Gm7618 | 0 NA | NA | NA | NA | NA |
| Gm7619 | 0 NA | NA | NA | NA | NA |
| Gm7621 | 0 NA | NA | NA | NA | NA |
| Gm7622 | 0 NA | NA | NA | NA | NA |
| Gm7624 | 0 NA | NA | NA | NA | NA |
| Gm7626 | 0 NA | NA | NA | NA | NA |
| Gm7627 | 0 NA | NA | NA | NA | NA |
| Gm7642 | 0 NA | NA | NA | NA | NA |
| Gm7648 | 0 NA | NA | NA | NA | NA |
| Gm7651 | 0 NA | NA | NA | NA | NA |
| Gm7653 | 0 NA | NA | NA | NA | NA |
| Gm7654 | 0 NA | NA | NA | NA | NA |
| Gm7657 | 0 NA | NA | NA | NA | NA |
| Gm7663 | 0 NA | NA | NA | NA | NA |
| Gm7665 | 0 NA | NA | NA | NA | NA |
| Gm7669 | 0 NA | NA | NA | NA | NA |
| Gm7672 | 0 NA | NA | NA | NA | NA |
| Gm7675 | 0 NA | NA | NA | NA | NA |
| Gm7676 | 0 NA | NA | NA | NA | NA |
| Gm7678 | 0 NA | NA | NA | NA | NA |
| Gm7680 | 0 NA | NA | NA | NA | NA |
| Gm7682 | 0 NA | NA | NA | NA | NA |
| Gm7690 | 0 NA | NA | NA | NA | NA |
| Gm7691 | 0 NA | NA | NA | NA | NA |
| Gm7692 | 0 NA | NA | NA | NA | NA |
| Gm7693 | 0 NA | NA | NA | NA | NA |
| Gm7695 | 0 NA | NA | NA | NA | NA |

|        |      |    |    |    |    |
|--------|------|----|----|----|----|
| Gm7696 | 0 NA | NA | NA | NA | NA |
| Gm7697 | 0 NA | NA | NA | NA | NA |
| Gm7700 | 0 NA | NA | NA | NA | NA |
| Gm7707 | 0 NA | NA | NA | NA | NA |
| Gm7708 | 0 NA | NA | NA | NA | NA |
| Gm7712 | 0 NA | NA | NA | NA | NA |
| Gm7713 | 0 NA | NA | NA | NA | NA |
| Gm7714 | 0 NA | NA | NA | NA | NA |
| Gm7719 | 0 NA | NA | NA | NA | NA |
| Gm7721 | 0 NA | NA | NA | NA | NA |
| Gm7722 | 0 NA | NA | NA | NA | NA |
| Gm7726 | 0 NA | NA | NA | NA | NA |
| Gm7727 | 0 NA | NA | NA | NA | NA |
| Gm773  | 0 NA | NA | NA | NA | NA |
| Gm7731 | 0 NA | NA | NA | NA | NA |
| Gm7732 | 0 NA | NA | NA | NA | NA |
| Gm7733 | 0 NA | NA | NA | NA | NA |
| Gm7734 | 0 NA | NA | NA | NA | NA |
| Gm7735 | 0 NA | NA | NA | NA | NA |
| Gm7736 | 0 NA | NA | NA | NA | NA |
| Gm7739 | 0 NA | NA | NA | NA | NA |
| Gm7740 | 0 NA | NA | NA | NA | NA |
| Gm7742 | 0 NA | NA | NA | NA | NA |
| Gm7745 | 0 NA | NA | NA | NA | NA |
| Gm7746 | 0 NA | NA | NA | NA | NA |
| Gm7748 | 0 NA | NA | NA | NA | NA |
| Gm7751 | 0 NA | NA | NA | NA | NA |
| Gm7753 | 0 NA | NA | NA | NA | NA |
| Gm7760 | 0 NA | NA | NA | NA | NA |
| Gm7761 | 0 NA | NA | NA | NA | NA |
| Gm7768 | 0 NA | NA | NA | NA | NA |
| Gm7778 | 0 NA | NA | NA | NA | NA |
| Gm7780 | 0 NA | NA | NA | NA | NA |
| Gm7783 | 0 NA | NA | NA | NA | NA |
| Gm7786 | 0 NA | NA | NA | NA | NA |
| Gm7787 | 0 NA | NA | NA | NA | NA |
| Gm7789 | 0 NA | NA | NA | NA | NA |
| Gm7790 | 0 NA | NA | NA | NA | NA |
| Gm7792 | 0 NA | NA | NA | NA | NA |
| Gm7799 | 0 NA | NA | NA | NA | NA |
| Gm7802 | 0 NA | NA | NA | NA | NA |
| Gm7805 | 0 NA | NA | NA | NA | NA |
| Gm7807 | 0 NA | NA | NA | NA | NA |
| Gm7809 | 0 NA | NA | NA | NA | NA |
| Gm7814 | 0 NA | NA | NA | NA | NA |
| Gm7815 | 0 NA | NA | NA | NA | NA |
| Gm7820 | 0 NA | NA | NA | NA | NA |
| Gm7821 | 0 NA | NA | NA | NA | NA |
| Gm7822 | 0 NA | NA | NA | NA | NA |
| Gm7824 | 0 NA | NA | NA | NA | NA |
| Gm7825 | 0 NA | NA | NA | NA | NA |
| Gm7833 | 0 NA | NA | NA | NA | NA |
| Gm7834 | 0 NA | NA | NA | NA | NA |
| Gm7836 | 0 NA | NA | NA | NA | NA |
| Gm7837 | 0 NA | NA | NA | NA | NA |
| Gm7838 | 0 NA | NA | NA | NA | NA |
| Gm7839 | 0 NA | NA | NA | NA | NA |
| Gm7840 | 0 NA | NA | NA | NA | NA |
| Gm7841 | 0 NA | NA | NA | NA | NA |
| Gm7842 | 0 NA | NA | NA | NA | NA |
| Gm7848 | 0 NA | NA | NA | NA | NA |
| Gm7850 | 0 NA | NA | NA | NA | NA |
| Gm7851 | 0 NA | NA | NA | NA | NA |
| Gm7853 | 0 NA | NA | NA | NA | NA |
| Gm7855 | 0 NA | NA | NA | NA | NA |
| Gm7856 | 0 NA | NA | NA | NA | NA |

|        |      |    |    |    |    |
|--------|------|----|----|----|----|
| Gm7857 | 0 NA | NA | NA | NA | NA |
| Gm7858 | 0 NA | NA | NA | NA | NA |
| Gm7859 | 0 NA | NA | NA | NA | NA |
| Gm7863 | 0 NA | NA | NA | NA | NA |
| Gm7869 | 0 NA | NA | NA | NA | NA |
| Gm7870 | 0 NA | NA | NA | NA | NA |
| Gm7871 | 0 NA | NA | NA | NA | NA |
| Gm7876 | 0 NA | NA | NA | NA | NA |
| Gm7879 | 0 NA | NA | NA | NA | NA |
| Gm7887 | 0 NA | NA | NA | NA | NA |
| Gm7891 | 0 NA | NA | NA | NA | NA |
| Gm7893 | 0 NA | NA | NA | NA | NA |
| Gm7895 | 0 NA | NA | NA | NA | NA |
| Gm7897 | 0 NA | NA | NA | NA | NA |
| Gm7903 | 0 NA | NA | NA | NA | NA |
| Gm7905 | 0 NA | NA | NA | NA | NA |
| Gm7911 | 0 NA | NA | NA | NA | NA |
| Gm7916 | 0 NA | NA | NA | NA | NA |
| Gm7919 | 0 NA | NA | NA | NA | NA |
| Gm7924 | 0 NA | NA | NA | NA | NA |
| Gm7925 | 0 NA | NA | NA | NA | NA |
| Gm7927 | 0 NA | NA | NA | NA | NA |
| Gm7928 | 0 NA | NA | NA | NA | NA |
| Gm7929 | 0 NA | NA | NA | NA | NA |
| Gm7931 | 0 NA | NA | NA | NA | NA |
| Gm7933 | 0 NA | NA | NA | NA | NA |
| Gm7935 | 0 NA | NA | NA | NA | NA |
| Gm7939 | 0 NA | NA | NA | NA | NA |
| Gm7942 | 0 NA | NA | NA | NA | NA |
| Gm7943 | 0 NA | NA | NA | NA | NA |
| Gm7945 | 0 NA | NA | NA | NA | NA |
| Gm7946 | 0 NA | NA | NA | NA | NA |
| Gm7948 | 0 NA | NA | NA | NA | NA |
| Gm7950 | 0 NA | NA | NA | NA | NA |
| Gm7951 | 0 NA | NA | NA | NA | NA |
| Gm7952 | 0 NA | NA | NA | NA | NA |
| Gm7953 | 0 NA | NA | NA | NA | NA |
| Gm7954 | 0 NA | NA | NA | NA | NA |
| Gm7957 | 0 NA | NA | NA | NA | NA |
| Gm7958 | 0 NA | NA | NA | NA | NA |
| Gm7959 | 0 NA | NA | NA | NA | NA |
| Gm7961 | 0 NA | NA | NA | NA | NA |
| Gm7965 | 0 NA | NA | NA | NA | NA |
| Gm7970 | 0 NA | NA | NA | NA | NA |
| Gm7971 | 0 NA | NA | NA | NA | NA |
| Gm7977 | 0 NA | NA | NA | NA | NA |
| Gm7979 | 0 NA | NA | NA | NA | NA |
| Gm7980 | 0 NA | NA | NA | NA | NA |
| Gm7984 | 0 NA | NA | NA | NA | NA |
| Gm7986 | 0 NA | NA | NA | NA | NA |
| Gm7988 | 0 NA | NA | NA | NA | NA |
| Gm7990 | 0 NA | NA | NA | NA | NA |
| Gm7991 | 0 NA | NA | NA | NA | NA |
| Gm7995 | 0 NA | NA | NA | NA | NA |
| Gm7997 | 0 NA | NA | NA | NA | NA |
| Gm8004 | 0 NA | NA | NA | NA | NA |
| Gm8005 | 0 NA | NA | NA | NA | NA |
| Gm8009 | 0 NA | NA | NA | NA | NA |
| Gm8011 | 0 NA | NA | NA | NA | NA |
| Gm8018 | 0 NA | NA | NA | NA | NA |
| Gm8019 | 0 NA | NA | NA | NA | NA |
| Gm8020 | 0 NA | NA | NA | NA | NA |
| Gm8022 | 0 NA | NA | NA | NA | NA |
| Gm8024 | 0 NA | NA | NA | NA | NA |
| Gm8031 | 0 NA | NA | NA | NA | NA |
| Gm8035 | 0 NA | NA | NA | NA | NA |

|        |      |    |    |    |    |
|--------|------|----|----|----|----|
| Gm8038 | 0 NA | NA | NA | NA | NA |
| Gm8039 | 0 NA | NA | NA | NA | NA |
| Gm8041 | 0 NA | NA | NA | NA | NA |
| Gm8046 | 0 NA | NA | NA | NA | NA |
| Gm8047 | 0 NA | NA | NA | NA | NA |
| Gm8050 | 0 NA | NA | NA | NA | NA |
| Gm8051 | 0 NA | NA | NA | NA | NA |
| Gm8055 | 0 NA | NA | NA | NA | NA |
| Gm8058 | 0 NA | NA | NA | NA | NA |
| Gm8061 | 0 NA | NA | NA | NA | NA |
| Gm8065 | 0 NA | NA | NA | NA | NA |
| Gm8068 | 0 NA | NA | NA | NA | NA |
| Gm8069 | 0 NA | NA | NA | NA | NA |
| Gm8074 | 0 NA | NA | NA | NA | NA |
| Gm8077 | 0 NA | NA | NA | NA | NA |
| Gm8079 | 0 NA | NA | NA | NA | NA |
| Gm8080 | 0 NA | NA | NA | NA | NA |
| Gm8082 | 0 NA | NA | NA | NA | NA |
| Gm8083 | 0 NA | NA | NA | NA | NA |
| Gm8084 | 0 NA | NA | NA | NA | NA |
| Gm8087 | 0 NA | NA | NA | NA | NA |
| Gm8089 | 0 NA | NA | NA | NA | NA |
| Gm8094 | 0 NA | NA | NA | NA | NA |
| Gm8096 | 0 NA | NA | NA | NA | NA |
| Gm8097 | 0 NA | NA | NA | NA | NA |
| Gm8099 | 0 NA | NA | NA | NA | NA |
| Gm8104 | 0 NA | NA | NA | NA | NA |
| Gm8106 | 0 NA | NA | NA | NA | NA |
| Gm8107 | 0 NA | NA | NA | NA | NA |
| Gm8111 | 0 NA | NA | NA | NA | NA |
| Gm8112 | 0 NA | NA | NA | NA | NA |
| Gm8114 | 0 NA | NA | NA | NA | NA |
| Gm8122 | 0 NA | NA | NA | NA | NA |
| Gm8126 | 0 NA | NA | NA | NA | NA |
| Gm8127 | 0 NA | NA | NA | NA | NA |
| Gm8129 | 0 NA | NA | NA | NA | NA |
| Gm813  | 0 NA | NA | NA | NA | NA |
| Gm8132 | 0 NA | NA | NA | NA | NA |
| Gm8138 | 0 NA | NA | NA | NA | NA |
| Gm8139 | 0 NA | NA | NA | NA | NA |
| Gm8143 | 0 NA | NA | NA | NA | NA |
| Gm8145 | 0 NA | NA | NA | NA | NA |
| Gm8146 | 0 NA | NA | NA | NA | NA |
| Gm815  | 0 NA | NA | NA | NA | NA |
| Gm8151 | 0 NA | NA | NA | NA | NA |
| Gm8152 | 0 NA | NA | NA | NA | NA |
| Gm8153 | 0 NA | NA | NA | NA | NA |
| Gm8155 | 0 NA | NA | NA | NA | NA |
| Gm8158 | 0 NA | NA | NA | NA | NA |
| Gm8159 | 0 NA | NA | NA | NA | NA |
| Gm8161 | 0 NA | NA | NA | NA | NA |
| Gm8162 | 0 NA | NA | NA | NA | NA |
| Gm8164 | 0 NA | NA | NA | NA | NA |
| Gm8171 | 0 NA | NA | NA | NA | NA |
| Gm8173 | 0 NA | NA | NA | NA | NA |
| Gm8176 | 0 NA | NA | NA | NA | NA |
| Gm8178 | 0 NA | NA | NA | NA | NA |
| Gm8180 | 0 NA | NA | NA | NA | NA |
| Gm8183 | 0 NA | NA | NA | NA | NA |
| Gm8190 | 0 NA | NA | NA | NA | NA |
| Gm8192 | 0 NA | NA | NA | NA | NA |
| Gm8194 | 0 NA | NA | NA | NA | NA |
| Gm8197 | 0 NA | NA | NA | NA | NA |
| Gm8199 | 0 NA | NA | NA | NA | NA |
| Gm8200 | 0 NA | NA | NA | NA | NA |
| Gm8202 | 0 NA | NA | NA | NA | NA |

|        |      |    |    |    |    |
|--------|------|----|----|----|----|
| Gm8204 | 0 NA | NA | NA | NA | NA |
| Gm8207 | 0 NA | NA | NA | NA | NA |
| Gm8209 | 0 NA | NA | NA | NA | NA |
| Gm8214 | 0 NA | NA | NA | NA | NA |
| Gm8215 | 0 NA | NA | NA | NA | NA |
| Gm8216 | 0 NA | NA | NA | NA | NA |
| Gm8219 | 0 NA | NA | NA | NA | NA |
| Gm8224 | 0 NA | NA | NA | NA | NA |
| Gm8229 | 0 NA | NA | NA | NA | NA |
| Gm8232 | 0 NA | NA | NA | NA | NA |
| Gm8238 | 0 NA | NA | NA | NA | NA |
| Gm8241 | 0 NA | NA | NA | NA | NA |
| Gm8244 | 0 NA | NA | NA | NA | NA |
| Gm8245 | 0 NA | NA | NA | NA | NA |
| Gm8246 | 0 NA | NA | NA | NA | NA |
| Gm8247 | 0 NA | NA | NA | NA | NA |
| Gm8249 | 0 NA | NA | NA | NA | NA |
| Gm8250 | 0 NA | NA | NA | NA | NA |
| Gm8254 | 0 NA | NA | NA | NA | NA |
| Gm8255 | 0 NA | NA | NA | NA | NA |
| Gm8257 | 0 NA | NA | NA | NA | NA |
| Gm8260 | 0 NA | NA | NA | NA | NA |
| Gm8261 | 0 NA | NA | NA | NA | NA |
| Gm8264 | 0 NA | NA | NA | NA | NA |
| Gm8265 | 0 NA | NA | NA | NA | NA |
| Gm8266 | 0 NA | NA | NA | NA | NA |
| Gm8267 | 0 NA | NA | NA | NA | NA |
| Gm8268 | 0 NA | NA | NA | NA | NA |
| Gm8271 | 0 NA | NA | NA | NA | NA |
| Gm8278 | 0 NA | NA | NA | NA | NA |
| Gm8279 | 0 NA | NA | NA | NA | NA |
| Gm8282 | 0 NA | NA | NA | NA | NA |
| Gm8285 | 0 NA | NA | NA | NA | NA |
| Gm8289 | 0 NA | NA | NA | NA | NA |
| Gm8291 | 0 NA | NA | NA | NA | NA |
| Gm8292 | 0 NA | NA | NA | NA | NA |
| Gm8297 | 0 NA | NA | NA | NA | NA |
| Gm8300 | 0 NA | NA | NA | NA | NA |
| Gm8303 | 0 NA | NA | NA | NA | NA |
| Gm8305 | 0 NA | NA | NA | NA | NA |
| Gm8309 | 0 NA | NA | NA | NA | NA |
| Gm8310 | 0 NA | NA | NA | NA | NA |
| Gm8312 | 0 NA | NA | NA | NA | NA |
| Gm8314 | 0 NA | NA | NA | NA | NA |
| Gm8320 | 0 NA | NA | NA | NA | NA |
| Gm8321 | 0 NA | NA | NA | NA | NA |
| Gm8323 | 0 NA | NA | NA | NA | NA |
| Gm8324 | 0 NA | NA | NA | NA | NA |
| Gm8328 | 0 NA | NA | NA | NA | NA |
| Gm8331 | 0 NA | NA | NA | NA | NA |
| Gm8332 | 0 NA | NA | NA | NA | NA |
| Gm8334 | 0 NA | NA | NA | NA | NA |
| Gm8338 | 0 NA | NA | NA | NA | NA |
| Gm8340 | 0 NA | NA | NA | NA | NA |
| Gm8341 | 0 NA | NA | NA | NA | NA |
| Gm8342 | 0 NA | NA | NA | NA | NA |
| Gm8344 | 0 NA | NA | NA | NA | NA |
| Gm8345 | 0 NA | NA | NA | NA | NA |
| Gm8346 | 0 NA | NA | NA | NA | NA |
| Gm8352 | 0 NA | NA | NA | NA | NA |
| Gm8354 | 0 NA | NA | NA | NA | NA |
| Gm8356 | 0 NA | NA | NA | NA | NA |
| Gm8357 | 0 NA | NA | NA | NA | NA |
| Gm8358 | 0 NA | NA | NA | NA | NA |
| Gm8362 | 0 NA | NA | NA | NA | NA |
| Gm8365 | 0 NA | NA | NA | NA | NA |

|        |      |    |    |    |    |
|--------|------|----|----|----|----|
| Gm8366 | 0 NA | NA | NA | NA | NA |
| Gm8374 | 0 NA | NA | NA | NA | NA |
| Gm8375 | 0 NA | NA | NA | NA | NA |
| Gm8379 | 0 NA | NA | NA | NA | NA |
| Gm8383 | 0 NA | NA | NA | NA | NA |
| Gm8384 | 0 NA | NA | NA | NA | NA |
| Gm8385 | 0 NA | NA | NA | NA | NA |
| Gm8388 | 0 NA | NA | NA | NA | NA |
| Gm8391 | 0 NA | NA | NA | NA | NA |
| Gm8392 | 0 NA | NA | NA | NA | NA |
| Gm8394 | 0 NA | NA | NA | NA | NA |
| Gm8398 | 0 NA | NA | NA | NA | NA |
| Gm8401 | 0 NA | NA | NA | NA | NA |
| Gm8402 | 0 NA | NA | NA | NA | NA |
| Gm8403 | 0 NA | NA | NA | NA | NA |
| Gm8408 | 0 NA | NA | NA | NA | NA |
| Gm8410 | 0 NA | NA | NA | NA | NA |
| Gm8412 | 0 NA | NA | NA | NA | NA |
| Gm8416 | 0 NA | NA | NA | NA | NA |
| Gm8417 | 0 NA | NA | NA | NA | NA |
| Gm8420 | 0 NA | NA | NA | NA | NA |
| Gm8421 | 0 NA | NA | NA | NA | NA |
| Gm8423 | 0 NA | NA | NA | NA | NA |
| Gm8435 | 0 NA | NA | NA | NA | NA |
| Gm8444 | 0 NA | NA | NA | NA | NA |
| Gm8446 | 0 NA | NA | NA | NA | NA |
| Gm8447 | 0 NA | NA | NA | NA | NA |
| Gm8456 | 0 NA | NA | NA | NA | NA |
| Gm8463 | 0 NA | NA | NA | NA | NA |
| Gm8475 | 0 NA | NA | NA | NA | NA |
| Gm8480 | 0 NA | NA | NA | NA | NA |
| Gm8482 | 0 NA | NA | NA | NA | NA |
| Gm8484 | 0 NA | NA | NA | NA | NA |
| Gm8486 | 0 NA | NA | NA | NA | NA |
| Gm8492 | 0 NA | NA | NA | NA | NA |
| Gm8495 | 0 NA | NA | NA | NA | NA |
| Gm8501 | 0 NA | NA | NA | NA | NA |
| Gm8504 | 0 NA | NA | NA | NA | NA |
| Gm8508 | 0 NA | NA | NA | NA | NA |
| Gm8510 | 0 NA | NA | NA | NA | NA |
| Gm8512 | 0 NA | NA | NA | NA | NA |
| Gm8514 | 0 NA | NA | NA | NA | NA |
| Gm8515 | 0 NA | NA | NA | NA | NA |
| Gm8518 | 0 NA | NA | NA | NA | NA |
| Gm8521 | 0 NA | NA | NA | NA | NA |
| Gm8523 | 0 NA | NA | NA | NA | NA |
| Gm8524 | 0 NA | NA | NA | NA | NA |
| Gm8525 | 0 NA | NA | NA | NA | NA |
| Gm8529 | 0 NA | NA | NA | NA | NA |
| Gm8531 | 0 NA | NA | NA | NA | NA |
| Gm8532 | 0 NA | NA | NA | NA | NA |
| Gm8540 | 0 NA | NA | NA | NA | NA |
| Gm8550 | 0 NA | NA | NA | NA | NA |
| Gm8556 | 0 NA | NA | NA | NA | NA |
| Gm8569 | 0 NA | NA | NA | NA | NA |
| Gm8574 | 0 NA | NA | NA | NA | NA |
| Gm8575 | 0 NA | NA | NA | NA | NA |
| Gm8580 | 0 NA | NA | NA | NA | NA |
| Gm8582 | 0 NA | NA | NA | NA | NA |
| Gm8584 | 0 NA | NA | NA | NA | NA |
| Gm8586 | 0 NA | NA | NA | NA | NA |
| Gm8587 | 0 NA | NA | NA | NA | NA |
| Gm8595 | 0 NA | NA | NA | NA | NA |
| Gm8596 | 0 NA | NA | NA | NA | NA |
| Gm8597 | 0 NA | NA | NA | NA | NA |
| Gm8600 | 0 NA | NA | NA | NA | NA |

|        |      |    |    |    |    |
|--------|------|----|----|----|----|
| Gm8601 | 0 NA | NA | NA | NA | NA |
| Gm8602 | 0 NA | NA | NA | NA | NA |
| Gm8603 | 0 NA | NA | NA | NA | NA |
| Gm8604 | 0 NA | NA | NA | NA | NA |
| Gm8605 | 0 NA | NA | NA | NA | NA |
| Gm8606 | 0 NA | NA | NA | NA | NA |
| Gm8607 | 0 NA | NA | NA | NA | NA |
| Gm8609 | 0 NA | NA | NA | NA | NA |
| Gm8613 | 0 NA | NA | NA | NA | NA |
| Gm8616 | 0 NA | NA | NA | NA | NA |
| Gm8617 | 0 NA | NA | NA | NA | NA |
| Gm8618 | 0 NA | NA | NA | NA | NA |
| Gm8625 | 0 NA | NA | NA | NA | NA |
| Gm8634 | 0 NA | NA | NA | NA | NA |
| Gm8637 | 0 NA | NA | NA | NA | NA |
| Gm8641 | 0 NA | NA | NA | NA | NA |
| Gm8644 | 0 NA | NA | NA | NA | NA |
| Gm8649 | 0 NA | NA | NA | NA | NA |
| Gm8652 | 0 NA | NA | NA | NA | NA |
| Gm8661 | 0 NA | NA | NA | NA | NA |
| Gm8662 | 0 NA | NA | NA | NA | NA |
| Gm8666 | 0 NA | NA | NA | NA | NA |
| Gm8667 | 0 NA | NA | NA | NA | NA |
| Gm8668 | 0 NA | NA | NA | NA | NA |
| Gm8669 | 0 NA | NA | NA | NA | NA |
| Gm8672 | 0 NA | NA | NA | NA | NA |
| Gm8674 | 0 NA | NA | NA | NA | NA |
| Gm8675 | 0 NA | NA | NA | NA | NA |
| Gm8676 | 0 NA | NA | NA | NA | NA |
| Gm8679 | 0 NA | NA | NA | NA | NA |
| Gm8681 | 0 NA | NA | NA | NA | NA |
| Gm8682 | 0 NA | NA | NA | NA | NA |
| Gm8685 | 0 NA | NA | NA | NA | NA |
| Gm8688 | 0 NA | NA | NA | NA | NA |
| Gm8696 | 0 NA | NA | NA | NA | NA |
| Gm8700 | 0 NA | NA | NA | NA | NA |
| Gm8704 | 0 NA | NA | NA | NA | NA |
| Gm8705 | 0 NA | NA | NA | NA | NA |
| Gm8706 | 0 NA | NA | NA | NA | NA |
| Gm8707 | 0 NA | NA | NA | NA | NA |
| Gm8708 | 0 NA | NA | NA | NA | NA |
| Gm8715 | 0 NA | NA | NA | NA | NA |
| Gm8719 | 0 NA | NA | NA | NA | NA |
| Gm8722 | 0 NA | NA | NA | NA | NA |
| Gm8725 | 0 NA | NA | NA | NA | NA |
| Gm8728 | 0 NA | NA | NA | NA | NA |
| Gm8734 | 0 NA | NA | NA | NA | NA |
| Gm8737 | 0 NA | NA | NA | NA | NA |
| Gm8745 | 0 NA | NA | NA | NA | NA |
| Gm8747 | 0 NA | NA | NA | NA | NA |
| Gm8748 | 0 NA | NA | NA | NA | NA |
| Gm8749 | 0 NA | NA | NA | NA | NA |
| Gm8754 | 0 NA | NA | NA | NA | NA |
| Gm8757 | 0 NA | NA | NA | NA | NA |
| Gm8761 | 0 NA | NA | NA | NA | NA |
| Gm8762 | 0 NA | NA | NA | NA | NA |
| Gm8765 | 0 NA | NA | NA | NA | NA |
| Gm8768 | 0 NA | NA | NA | NA | NA |
| Gm8778 | 0 NA | NA | NA | NA | NA |
| Gm8783 | 0 NA | NA | NA | NA | NA |
| Gm8785 | 0 NA | NA | NA | NA | NA |
| Gm8790 | 0 NA | NA | NA | NA | NA |
| Gm8793 | 0 NA | NA | NA | NA | NA |
| Gm8796 | 0 NA | NA | NA | NA | NA |
| Gm8801 | 0 NA | NA | NA | NA | NA |
| Gm8802 | 0 NA | NA | NA | NA | NA |



|        |      |    |    |    |    |
|--------|------|----|----|----|----|
| Gm8812 | 0 NA | NA | NA | NA | NA |
| Gm8814 | 0 NA | NA | NA | NA | NA |
| Gm8815 | 0 NA | NA | NA | NA | NA |
| Gm8818 | 0 NA | NA | NA | NA | NA |
| Gm8820 | 0 NA | NA | NA | NA | NA |
| Gm8823 | 0 NA | NA | NA | NA | NA |
| Gm8826 | 0 NA | NA | NA | NA | NA |
| Gm8828 | 0 NA | NA | NA | NA | NA |
| Gm8836 | 0 NA | NA | NA | NA | NA |
| Gm8837 | 0 NA | NA | NA | NA | NA |
| Gm8838 | 0 NA | NA | NA | NA | NA |
| Gm884  | 0 NA | NA | NA | NA | NA |
| Gm8840 | 0 NA | NA | NA | NA | NA |
| Gm8843 | 0 NA | NA | NA | NA | NA |
| Gm8847 | 0 NA | NA | NA | NA | NA |
| Gm8848 | 0 NA | NA | NA | NA | NA |
| Gm8849 | 0 NA | NA | NA | NA | NA |
| Gm8853 | 0 NA | NA | NA | NA | NA |
| Gm8855 | 0 NA | NA | NA | NA | NA |
| Gm8856 | 0 NA | NA | NA | NA | NA |
| Gm8857 | 0 NA | NA | NA | NA | NA |
| Gm8860 | 0 NA | NA | NA | NA | NA |
| Gm8861 | 0 NA | NA | NA | NA | NA |
| Gm8862 | 0 NA | NA | NA | NA | NA |
| Gm8863 | 0 NA | NA | NA | NA | NA |
| Gm8864 | 0 NA | NA | NA | NA | NA |
| Gm8868 | 0 NA | NA | NA | NA | NA |
| Gm8869 | 0 NA | NA | NA | NA | NA |
| Gm8870 | 0 NA | NA | NA | NA | NA |
| Gm8871 | 0 NA | NA | NA | NA | NA |
| Gm8872 | 0 NA | NA | NA | NA | NA |
| Gm8874 | 0 NA | NA | NA | NA | NA |
| Gm8876 | 0 NA | NA | NA | NA | NA |
| Gm8877 | 0 NA | NA | NA | NA | NA |
| Gm8879 | 0 NA | NA | NA | NA | NA |
| Gm8880 | 0 NA | NA | NA | NA | NA |
| Gm8882 | 0 NA | NA | NA | NA | NA |
| Gm8885 | 0 NA | NA | NA | NA | NA |
| Gm8888 | 0 NA | NA | NA | NA | NA |
| Gm8891 | 0 NA | NA | NA | NA | NA |
| Gm8894 | 0 NA | NA | NA | NA | NA |
| Gm8897 | 0 NA | NA | NA | NA | NA |
| Gm8906 | 0 NA | NA | NA | NA | NA |
| Gm8907 | 0 NA | NA | NA | NA | NA |
| Gm8908 | 0 NA | NA | NA | NA | NA |
| Gm8911 | 0 NA | NA | NA | NA | NA |
| Gm8913 | 0 NA | NA | NA | NA | NA |
| Gm8914 | 0 NA | NA | NA | NA | NA |
| Gm8916 | 0 NA | NA | NA | NA | NA |
| Gm8918 | 0 NA | NA | NA | NA | NA |
| Gm8919 | 0 NA | NA | NA | NA | NA |
| Gm8920 | 0 NA | NA | NA | NA | NA |
| Gm8921 | 0 NA | NA | NA | NA | NA |
| Gm8922 | 0 NA | NA | NA | NA | NA |
| Gm8924 | 0 NA | NA | NA | NA | NA |
| Gm8926 | 0 NA | NA | NA | NA | NA |
| Gm8927 | 0 NA | NA | NA | NA | NA |
| Gm8929 | 0 NA | NA | NA | NA | NA |
| Gm8930 | 0 NA | NA | NA | NA | NA |
| Gm8939 | 0 NA | NA | NA | NA | NA |
| Gm8947 | 0 NA | NA | NA | NA | NA |
| Gm8948 | 0 NA | NA | NA | NA | NA |
| Gm8957 | 0 NA | NA | NA | NA | NA |
| Gm8959 | 0 NA | NA | NA | NA | NA |
| Gm8960 | 0 NA | NA | NA | NA | NA |
| Gm8961 | 0 NA | NA | NA | NA | NA |

|        |      |    |    |    |    |
|--------|------|----|----|----|----|
| Gm8964 | 0 NA | NA | NA | NA | NA |
| Gm8968 | 0 NA | NA | NA | NA | NA |
| Gm8971 | 0 NA | NA | NA | NA | NA |
| Gm8973 | 0 NA | NA | NA | NA | NA |
| Gm8974 | 0 NA | NA | NA | NA | NA |
| Gm8980 | 0 NA | NA | NA | NA | NA |
| Gm8982 | 0 NA | NA | NA | NA | NA |
| Gm8984 | 0 NA | NA | NA | NA | NA |
| Gm8988 | 0 NA | NA | NA | NA | NA |
| Gm8992 | 0 NA | NA | NA | NA | NA |
| Gm8993 | 0 NA | NA | NA | NA | NA |
| Gm8996 | 0 NA | NA | NA | NA | NA |
| Gm8999 | 0 NA | NA | NA | NA | NA |
| Gm9    | 0 NA | NA | NA | NA | NA |
| Gm9002 | 0 NA | NA | NA | NA | NA |
| Gm9003 | 0 NA | NA | NA | NA | NA |
| Gm9004 | 0 NA | NA | NA | NA | NA |
| Gm9006 | 0 NA | NA | NA | NA | NA |
| Gm9009 | 0 NA | NA | NA | NA | NA |
| Gm9012 | 0 NA | NA | NA | NA | NA |
| Gm9013 | 0 NA | NA | NA | NA | NA |
| Gm9022 | 0 NA | NA | NA | NA | NA |
| Gm9025 | 0 NA | NA | NA | NA | NA |
| Gm9034 | 0 NA | NA | NA | NA | NA |
| Gm9035 | 0 NA | NA | NA | NA | NA |
| Gm9038 | 0 NA | NA | NA | NA | NA |
| Gm904  | 0 NA | NA | NA | NA | NA |
| Gm9040 | 0 NA | NA | NA | NA | NA |
| Gm9043 | 0 NA | NA | NA | NA | NA |
| Gm9044 | 0 NA | NA | NA | NA | NA |
| Gm9045 | 0 NA | NA | NA | NA | NA |
| Gm9046 | 0 NA | NA | NA | NA | NA |
| Gm9049 | 0 NA | NA | NA | NA | NA |
| Gm9050 | 0 NA | NA | NA | NA | NA |
| Gm9051 | 0 NA | NA | NA | NA | NA |
| Gm906  | 0 NA | NA | NA | NA | NA |
| Gm9060 | 0 NA | NA | NA | NA | NA |
| Gm9061 | 0 NA | NA | NA | NA | NA |
| Gm9062 | 0 NA | NA | NA | NA | NA |
| Gm9063 | 0 NA | NA | NA | NA | NA |
| Gm9064 | 0 NA | NA | NA | NA | NA |
| Gm9068 | 0 NA | NA | NA | NA | NA |
| Gm9071 | 0 NA | NA | NA | NA | NA |
| Gm9072 | 0 NA | NA | NA | NA | NA |
| Gm9075 | 0 NA | NA | NA | NA | NA |
| Gm9078 | 0 NA | NA | NA | NA | NA |
| Gm9086 | 0 NA | NA | NA | NA | NA |
| Gm9088 | 0 NA | NA | NA | NA | NA |
| Gm9089 | 0 NA | NA | NA | NA | NA |
| Gm9098 | 0 NA | NA | NA | NA | NA |
| Gm9102 | 0 NA | NA | NA | NA | NA |
| Gm9103 | 0 NA | NA | NA | NA | NA |
| Gm9108 | 0 NA | NA | NA | NA | NA |
| Gm9109 | 0 NA | NA | NA | NA | NA |
| Gm9110 | 0 NA | NA | NA | NA | NA |
| Gm9111 | 0 NA | NA | NA | NA | NA |
| Gm9112 | 0 NA | NA | NA | NA | NA |
| Gm9113 | 0 NA | NA | NA | NA | NA |
| Gm9116 | 0 NA | NA | NA | NA | NA |
| Gm9117 | 0 NA | NA | NA | NA | NA |
| Gm9119 | 0 NA | NA | NA | NA | NA |
| Gm9121 | 0 NA | NA | NA | NA | NA |
| Gm9124 | 0 NA | NA | NA | NA | NA |
| Gm9126 | 0 NA | NA | NA | NA | NA |
| Gm9127 | 0 NA | NA | NA | NA | NA |
| Gm9129 | 0 NA | NA | NA | NA | NA |

|        |      |    |    |    |    |
|--------|------|----|----|----|----|
| Gm9131 | 0 NA | NA | NA | NA | NA |
| Gm9132 | 0 NA | NA | NA | NA | NA |
| Gm9133 | 0 NA | NA | NA | NA | NA |
| Gm9134 | 0 NA | NA | NA | NA | NA |
| Gm9136 | 0 NA | NA | NA | NA | NA |
| Gm9139 | 0 NA | NA | NA | NA | NA |
| Gm9141 | 0 NA | NA | NA | NA | NA |
| Gm9142 | 0 NA | NA | NA | NA | NA |
| Gm9144 | 0 NA | NA | NA | NA | NA |
| Gm9146 | 0 NA | NA | NA | NA | NA |
| Gm9149 | 0 NA | NA | NA | NA | NA |
| Gm9156 | 0 NA | NA | NA | NA | NA |
| Gm9158 | 0 NA | NA | NA | NA | NA |
| Gm9162 | 0 NA | NA | NA | NA | NA |
| Gm9164 | 0 NA | NA | NA | NA | NA |
| Gm9166 | 0 NA | NA | NA | NA | NA |
| Gm9167 | 0 NA | NA | NA | NA | NA |
| Gm9172 | 0 NA | NA | NA | NA | NA |
| Gm9173 | 0 NA | NA | NA | NA | NA |
| Gm9174 | 0 NA | NA | NA | NA | NA |
| Gm9176 | 0 NA | NA | NA | NA | NA |
| Gm9182 | 0 NA | NA | NA | NA | NA |
| Gm9192 | 0 NA | NA | NA | NA | NA |
| Gm9195 | 0 NA | NA | NA | NA | NA |
| Gm9200 | 0 NA | NA | NA | NA | NA |
| Gm9202 | 0 NA | NA | NA | NA | NA |
| Gm9204 | 0 NA | NA | NA | NA | NA |
| Gm9207 | 0 NA | NA | NA | NA | NA |
| Gm9208 | 0 NA | NA | NA | NA | NA |
| Gm9211 | 0 NA | NA | NA | NA | NA |
| Gm9218 | 0 NA | NA | NA | NA | NA |
| Gm9220 | 0 NA | NA | NA | NA | NA |
| Gm9225 | 0 NA | NA | NA | NA | NA |
| Gm9226 | 0 NA | NA | NA | NA | NA |
| Gm9227 | 0 NA | NA | NA | NA | NA |
| Gm9229 | 0 NA | NA | NA | NA | NA |
| Gm9236 | 0 NA | NA | NA | NA | NA |
| Gm9238 | 0 NA | NA | NA | NA | NA |
| Gm9239 | 0 NA | NA | NA | NA | NA |
| Gm9240 | 0 NA | NA | NA | NA | NA |
| Gm9244 | 0 NA | NA | NA | NA | NA |
| Gm9245 | 0 NA | NA | NA | NA | NA |
| Gm9247 | 0 NA | NA | NA | NA | NA |
| Gm9249 | 0 NA | NA | NA | NA | NA |
| Gm9251 | 0 NA | NA | NA | NA | NA |
| Gm9259 | 0 NA | NA | NA | NA | NA |
| Gm9260 | 0 NA | NA | NA | NA | NA |
| Gm9264 | 0 NA | NA | NA | NA | NA |
| Gm9265 | 0 NA | NA | NA | NA | NA |
| Gm9266 | 0 NA | NA | NA | NA | NA |
| Gm9267 | 0 NA | NA | NA | NA | NA |
| Gm9269 | 0 NA | NA | NA | NA | NA |
| Gm9271 | 0 NA | NA | NA | NA | NA |
| Gm9274 | 0 NA | NA | NA | NA | NA |
| Gm9275 | 0 NA | NA | NA | NA | NA |
| Gm9278 | 0 NA | NA | NA | NA | NA |
| Gm9279 | 0 NA | NA | NA | NA | NA |
| Gm9280 | 0 NA | NA | NA | NA | NA |
| Gm9285 | 0 NA | NA | NA | NA | NA |
| Gm9286 | 0 NA | NA | NA | NA | NA |
| Gm9287 | 0 NA | NA | NA | NA | NA |
| Gm9289 | 0 NA | NA | NA | NA | NA |
| Gm9290 | 0 NA | NA | NA | NA | NA |
| Gm9292 | 0 NA | NA | NA | NA | NA |
| Gm9293 | 0 NA | NA | NA | NA | NA |
| Gm9298 | 0 NA | NA | NA | NA | NA |

|        |      |    |    |    |    |
|--------|------|----|----|----|----|
| Gm9299 | 0 NA | NA | NA | NA | NA |
| Gm9305 | 0 NA | NA | NA | NA | NA |
| Gm9309 | 0 NA | NA | NA | NA | NA |
| Gm9311 | 0 NA | NA | NA | NA | NA |
| Gm9314 | 0 NA | NA | NA | NA | NA |
| Gm9318 | 0 NA | NA | NA | NA | NA |
| Gm9321 | 0 NA | NA | NA | NA | NA |
| Gm9322 | 0 NA | NA | NA | NA | NA |
| Gm9332 | 0 NA | NA | NA | NA | NA |
| Gm9334 | 0 NA | NA | NA | NA | NA |
| Gm9335 | 0 NA | NA | NA | NA | NA |
| Gm9343 | 0 NA | NA | NA | NA | NA |
| Gm9347 | 0 NA | NA | NA | NA | NA |
| Gm9348 | 0 NA | NA | NA | NA | NA |
| Gm9357 | 0 NA | NA | NA | NA | NA |
| Gm9358 | 0 NA | NA | NA | NA | NA |
| Gm9359 | 0 NA | NA | NA | NA | NA |
| Gm9367 | 0 NA | NA | NA | NA | NA |
| Gm9368 | 0 NA | NA | NA | NA | NA |
| Gm9370 | 0 NA | NA | NA | NA | NA |
| Gm9373 | 0 NA | NA | NA | NA | NA |
| Gm9376 | 0 NA | NA | NA | NA | NA |
| Gm9377 | 0 NA | NA | NA | NA | NA |
| Gm9378 | 0 NA | NA | NA | NA | NA |
| Gm9379 | 0 NA | NA | NA | NA | NA |
| Gm9381 | 0 NA | NA | NA | NA | NA |
| Gm9391 | 0 NA | NA | NA | NA | NA |
| Gm9395 | 0 NA | NA | NA | NA | NA |
| Gm9397 | 0 NA | NA | NA | NA | NA |
| Gm94   | 0 NA | NA | NA | NA | NA |
| Gm9408 | 0 NA | NA | NA | NA | NA |
| Gm9409 | 0 NA | NA | NA | NA | NA |
| Gm9415 | 0 NA | NA | NA | NA | NA |
| Gm9427 | 0 NA | NA | NA | NA | NA |
| Gm9428 | 0 NA | NA | NA | NA | NA |
| Gm9430 | 0 NA | NA | NA | NA | NA |
| Gm9432 | 0 NA | NA | NA | NA | NA |
| Gm9439 | 0 NA | NA | NA | NA | NA |
| Gm9440 | 0 NA | NA | NA | NA | NA |
| Gm9445 | 0 NA | NA | NA | NA | NA |
| Gm9449 | 0 NA | NA | NA | NA | NA |
| Gm9451 | 0 NA | NA | NA | NA | NA |
| Gm9463 | 0 NA | NA | NA | NA | NA |
| Gm9466 | 0 NA | NA | NA | NA | NA |
| Gm9472 | 0 NA | NA | NA | NA | NA |
| Gm9476 | 0 NA | NA | NA | NA | NA |
| Gm9487 | 0 NA | NA | NA | NA | NA |
| Gm9495 | 0 NA | NA | NA | NA | NA |
| Gm9497 | 0 NA | NA | NA | NA | NA |
| Gm9498 | 0 NA | NA | NA | NA | NA |
| Gm9499 | 0 NA | NA | NA | NA | NA |
| Gm9501 | 0 NA | NA | NA | NA | NA |
| Gm9504 | 0 NA | NA | NA | NA | NA |
| Gm9506 | 0 NA | NA | NA | NA | NA |
| Gm9507 | 0 NA | NA | NA | NA | NA |
| Gm9508 | 0 NA | NA | NA | NA | NA |
| Gm9509 | 0 NA | NA | NA | NA | NA |
| Gm9515 | 0 NA | NA | NA | NA | NA |
| Gm9516 | 0 NA | NA | NA | NA | NA |
| Gm9517 | 0 NA | NA | NA | NA | NA |
| Gm9519 | 0 NA | NA | NA | NA | NA |
| Gm9520 | 0 NA | NA | NA | NA | NA |
| Gm9523 | 0 NA | NA | NA | NA | NA |
| Gm9529 | 0 NA | NA | NA | NA | NA |
| Gm9535 | 0 NA | NA | NA | NA | NA |
| Gm9540 | 0 NA | NA | NA | NA | NA |

|        |      |    |    |    |    |
|--------|------|----|----|----|----|
| Gm9541 | 0 NA | NA | NA | NA | NA |
| Gm9547 | 0 NA | NA | NA | NA | NA |
| Gm9550 | 0 NA | NA | NA | NA | NA |
| Gm9553 | 0 NA | NA | NA | NA | NA |
| Gm9555 | 0 NA | NA | NA | NA | NA |
| Gm9556 | 0 NA | NA | NA | NA | NA |
| Gm9560 | 0 NA | NA | NA | NA | NA |
| Gm9568 | 0 NA | NA | NA | NA | NA |
| Gm9569 | 0 NA | NA | NA | NA | NA |
| Gm9570 | 0 NA | NA | NA | NA | NA |
| Gm9573 | 0 NA | NA | NA | NA | NA |
| Gm9574 | 0 NA | NA | NA | NA | NA |
| Gm9577 | 0 NA | NA | NA | NA | NA |
| Gm9578 | 0 NA | NA | NA | NA | NA |
| Gm9585 | 0 NA | NA | NA | NA | NA |
| Gm9587 | 0 NA | NA | NA | NA | NA |
| Gm9593 | 0 NA | NA | NA | NA | NA |
| Gm9595 | 0 NA | NA | NA | NA | NA |
| Gm9597 | 0 NA | NA | NA | NA | NA |
| Gm9599 | 0 NA | NA | NA | NA | NA |
| Gm9602 | 0 NA | NA | NA | NA | NA |
| Gm9603 | 0 NA | NA | NA | NA | NA |
| Gm9604 | 0 NA | NA | NA | NA | NA |
| Gm9611 | 0 NA | NA | NA | NA | NA |
| Gm9613 | 0 NA | NA | NA | NA | NA |
| Gm9621 | 0 NA | NA | NA | NA | NA |
| Gm9628 | 0 NA | NA | NA | NA | NA |
| Gm9630 | 0 NA | NA | NA | NA | NA |
| Gm9632 | 0 NA | NA | NA | NA | NA |
| Gm9634 | 0 NA | NA | NA | NA | NA |
| Gm9637 | 0 NA | NA | NA | NA | NA |
| Gm9639 | 0 NA | NA | NA | NA | NA |
| Gm9643 | 0 NA | NA | NA | NA | NA |
| Gm9652 | 0 NA | NA | NA | NA | NA |
| Gm9655 | 0 NA | NA | NA | NA | NA |
| Gm9658 | 0 NA | NA | NA | NA | NA |
| Gm9661 | 0 NA | NA | NA | NA | NA |
| Gm9662 | 0 NA | NA | NA | NA | NA |
| Gm9671 | 0 NA | NA | NA | NA | NA |
| Gm9672 | 0 NA | NA | NA | NA | NA |
| Gm9673 | 0 NA | NA | NA | NA | NA |
| Gm9685 | 0 NA | NA | NA | NA | NA |
| Gm9689 | 0 NA | NA | NA | NA | NA |
| Gm9697 | 0 NA | NA | NA | NA | NA |
| Gm9700 | 0 NA | NA | NA | NA | NA |
| Gm9701 | 0 NA | NA | NA | NA | NA |
| Gm9710 | 0 NA | NA | NA | NA | NA |
| Gm9711 | 0 NA | NA | NA | NA | NA |
| Gm9719 | 0 NA | NA | NA | NA | NA |
| Gm9721 | 0 NA | NA | NA | NA | NA |
| Gm9723 | 0 NA | NA | NA | NA | NA |
| Gm9727 | 0 NA | NA | NA | NA | NA |
| Gm9728 | 0 NA | NA | NA | NA | NA |
| Gm9729 | 0 NA | NA | NA | NA | NA |
| Gm9731 | 0 NA | NA | NA | NA | NA |
| Gm9732 | 0 NA | NA | NA | NA | NA |
| Gm9736 | 0 NA | NA | NA | NA | NA |
| Gm9742 | 0 NA | NA | NA | NA | NA |
| Gm9745 | 0 NA | NA | NA | NA | NA |
| Gm9758 | 0 NA | NA | NA | NA | NA |
| Gm9761 | 0 NA | NA | NA | NA | NA |
| Gm9765 | 0 NA | NA | NA | NA | NA |
| Gm9772 | 0 NA | NA | NA | NA | NA |
| Gm9774 | 0 NA | NA | NA | NA | NA |
| Gm9775 | 0 NA | NA | NA | NA | NA |
| Gm9785 | 0 NA | NA | NA | NA | NA |

|            |      |    |    |    |    |
|------------|------|----|----|----|----|
| Gm9789     | 0 NA | NA | NA | NA | NA |
| Gm9790     | 0 NA | NA | NA | NA | NA |
| Gm9791     | 0 NA | NA | NA | NA | NA |
| Gm9800     | 0 NA | NA | NA | NA | NA |
| Gm9806     | 0 NA | NA | NA | NA | NA |
| Gm9816     | 0 NA | NA | NA | NA | NA |
| Gm9823     | 0 NA | NA | NA | NA | NA |
| Gm9824     | 0 NA | NA | NA | NA | NA |
| Gm9833     | 0 NA | NA | NA | NA | NA |
| Gm9836     | 0 NA | NA | NA | NA | NA |
| Gm9837     | 0 NA | NA | NA | NA | NA |
| Gm9845     | 0 NA | NA | NA | NA | NA |
| Gm9847     | 0 NA | NA | NA | NA | NA |
| Gm9848     | 0 NA | NA | NA | NA | NA |
| Gm9850     | 0 NA | NA | NA | NA | NA |
| Gm9857     | 0 NA | NA | NA | NA | NA |
| Gm9890     | 0 NA | NA | NA | NA | NA |
| Gm9944     | 0 NA | NA | NA | NA | NA |
| Gm9955     | 0 NA | NA | NA | NA | NA |
| Gm9972     | 0 NA | NA | NA | NA | NA |
| Gmfg-ps    | 0 NA | NA | NA | NA | NA |
| Gmnc       | 0 NA | NA | NA | NA | NA |
| Gnb1-ps2   | 0 NA | NA | NA | NA | NA |
| Gnb1-ps3   | 0 NA | NA | NA | NA | NA |
| Gng2-ps1   | 0 NA | NA | NA | NA | NA |
| Gpha2      | 0 NA | NA | NA | NA | NA |
| Gpr101     | 0 NA | NA | NA | NA | NA |
| Gpr119     | 0 NA | NA | NA | NA | NA |
| Gpr139     | 0 NA | NA | NA | NA | NA |
| Gpr142     | 0 NA | NA | NA | NA | NA |
| Gpr151     | 0 NA | NA | NA | NA | NA |
| Gpr158     | 0 NA | NA | NA | NA | NA |
| Gpr22      | 0 NA | NA | NA | NA | NA |
| Gpr6       | 0 NA | NA | NA | NA | NA |
| Gpr61      | 0 NA | NA | NA | NA | NA |
| Gpx5       | 0 NA | NA | NA | NA | NA |
| Grm3       | 0 NA | NA | NA | NA | NA |
| Grm4       | 0 NA | NA | NA | NA | NA |
| Grm7       | 0 NA | NA | NA | NA | NA |
| Grxcr1     | 0 NA | NA | NA | NA | NA |
| Grxcr2     | 0 NA | NA | NA | NA | NA |
| Gsc2       | 0 NA | NA | NA | NA | NA |
| Gsdma3     | 0 NA | NA | NA | NA | NA |
| Gsdmc      | 0 NA | NA | NA | NA | NA |
| Gsdmc2     | 0 NA | NA | NA | NA | NA |
| Gsdmc3     | 0 NA | NA | NA | NA | NA |
| Gsdmcl-ps  | 0 NA | NA | NA | NA | NA |
| Gsdmcl1    | 0 NA | NA | NA | NA | NA |
| Gsg1l2     | 0 NA | NA | NA | NA | NA |
| Gstp-ps    | 0 NA | NA | NA | NA | NA |
| Gsx1       | 0 NA | NA | NA | NA | NA |
| Gsx2       | 0 NA | NA | NA | NA | NA |
| Gtf2a1l    | 0 NA | NA | NA | NA | NA |
| Gtpbp4-ps2 | 0 NA | NA | NA | NA | NA |
| Gtpbp4-ps3 | 0 NA | NA | NA | NA | NA |
| Gtpbp4-ps4 | 0 NA | NA | NA | NA | NA |
| Gtpbp4-ps5 | 0 NA | NA | NA | NA | NA |
| Gtpbp4-ps7 | 0 NA | NA | NA | NA | NA |
| Gtsf2      | 0 NA | NA | NA | NA | NA |
| Gucy1b2    | 0 NA | NA | NA | NA | NA |
| Gucy2d     | 0 NA | NA | NA | NA | NA |
| Gucy2e     | 0 NA | NA | NA | NA | NA |
| Gykl1      | 0 NA | NA | NA | NA | NA |
| Gzmd       | 0 NA | NA | NA | NA | NA |
| Gzme       | 0 NA | NA | NA | NA | NA |
| Gzmg       | 0 NA | NA | NA | NA | NA |

|              |      |    |    |    |    |
|--------------|------|----|----|----|----|
| Gzmn         | 0 NA | NA | NA | NA | NA |
| H1f7         | 0 NA | NA | NA | NA | NA |
| H1f8         | 0 NA | NA | NA | NA | NA |
| H2-M1        | 0 NA | NA | NA | NA | NA |
| H2-M10.1     | 0 NA | NA | NA | NA | NA |
| H2-M10.3     | 0 NA | NA | NA | NA | NA |
| H2-M10.4     | 0 NA | NA | NA | NA | NA |
| H2-M10.5     | 0 NA | NA | NA | NA | NA |
| H2-M10.5-ps1 | 0 NA | NA | NA | NA | NA |
| H2-M10.6     | 0 NA | NA | NA | NA | NA |
| H2-M11       | 0 NA | NA | NA | NA | NA |
| H2-M9        | 0 NA | NA | NA | NA | NA |
| H2-Pa        | 0 NA | NA | NA | NA | NA |
| H2-Pb        | 0 NA | NA | NA | NA | NA |
| H2ab1        | 0 NA | NA | NA | NA | NA |
| H2ab2        | 0 NA | NA | NA | NA | NA |
| H2ab3        | 0 NA | NA | NA | NA | NA |
| H2ac1        | 0 NA | NA | NA | NA | NA |
| H2ac14       | 0 NA | NA | NA | NA | NA |
| H2af-ps      | 0 NA | NA | NA | NA | NA |
| H2afy3       | 0 NA | NA | NA | NA | NA |
| H2a1a        | 0 NA | NA | NA | NA | NA |
| H2a1b        | 0 NA | NA | NA | NA | NA |
| H2a1e        | 0 NA | NA | NA | NA | NA |
| H2a1g        | 0 NA | NA | NA | NA | NA |
| H2a1j        | 0 NA | NA | NA | NA | NA |
| H2a1k        | 0 NA | NA | NA | NA | NA |
| H2a1n        | 0 NA | NA | NA | NA | NA |
| H2a1o        | 0 NA | NA | NA | NA | NA |
| H2a12a       | 0 NA | NA | NA | NA | NA |
| H2a12b       | 0 NA | NA | NA | NA | NA |
| H2a12c       | 0 NA | NA | NA | NA | NA |
| H2bc1        | 0 NA | NA | NA | NA | NA |
| H2bfm        | 0 NA | NA | NA | NA | NA |
| H3f3a-ps1    | 0 NA | NA | NA | NA | NA |
| H3f3c        | 0 NA | NA | NA | NA | NA |
| Hand1        | 0 NA | NA | NA | NA | NA |
| Has1         | 0 NA | NA | NA | NA | NA |
| Hba-ps3      | 0 NA | NA | NA | NA | NA |
| Hba-ps4      | 0 NA | NA | NA | NA | NA |
| Hba-x        | 0 NA | NA | NA | NA | NA |
| Hbb-bh0      | 0 NA | NA | NA | NA | NA |
| Hbb-bh1      | 0 NA | NA | NA | NA | NA |
| Hbb-bh2      | 0 NA | NA | NA | NA | NA |
| Hbb-bh3      | 0 NA | NA | NA | NA | NA |
| Hbb-y        | 0 NA | NA | NA | NA | NA |
| Hbq1a        | 0 NA | NA | NA | NA | NA |
| Hcfc1r1-ps1  | 0 NA | NA | NA | NA | NA |
| Hcfc1r1-ps2  | 0 NA | NA | NA | NA | NA |
| Hcn4         | 0 NA | NA | NA | NA | NA |
| Hdgfl1       | 0 NA | NA | NA | NA | NA |
| Helt         | 0 NA | NA | NA | NA | NA |
| Hes3         | 0 NA | NA | NA | NA | NA |
| Hes5         | 0 NA | NA | NA | NA | NA |
| Hhla1        | 0 NA | NA | NA | NA | NA |
| Hmgb1-ps1    | 0 NA | NA | NA | NA | NA |
| Hmgb1-ps11   | 0 NA | NA | NA | NA | NA |
| Hmgb1-ps4    | 0 NA | NA | NA | NA | NA |
| Hmgb1-ps7    | 0 NA | NA | NA | NA | NA |
| Hmgb1-rs18   | 0 NA | NA | NA | NA | NA |
| Hmgb1l       | 0 NA | NA | NA | NA | NA |
| Hmgb3-ps     | 0 NA | NA | NA | NA | NA |
| Hmgb4        | 0 NA | NA | NA | NA | NA |
| Hmgn2l6      | 0 NA | NA | NA | NA | NA |
| Hmx3         | 0 NA | NA | NA | NA | NA |
| Hnrnpa1l2-ps | 0 NA | NA | NA | NA | NA |

|           |      |    |    |    |    |
|-----------|------|----|----|----|----|
| Hormad1   | 0 NA | NA | NA | NA | NA |
| Hoxb9     | 0 NA | NA | NA | NA | NA |
| Hoxc11    | 0 NA | NA | NA | NA | NA |
| Hoxc12    | 0 NA | NA | NA | NA | NA |
| Hoxd1     | 0 NA | NA | NA | NA | NA |
| Hoxd12    | 0 NA | NA | NA | NA | NA |
| Hoxd13    | 0 NA | NA | NA | NA | NA |
| Hrh3      | 0 NA | NA | NA | NA | NA |
| Hrh4      | 0 NA | NA | NA | NA | NA |
| Hrnr      | 0 NA | NA | NA | NA | NA |
| Hs3st5    | 0 NA | NA | NA | NA | NA |
| Hs6st3    | 0 NA | NA | NA | NA | NA |
| Hsd3b6    | 0 NA | NA | NA | NA | NA |
| Hsfy2     | 0 NA | NA | NA | NA | NA |
| Hsp25-ps1 | 0 NA | NA | NA | NA | NA |
| Hspb3     | 0 NA | NA | NA | NA | NA |
| Hspd1-ps1 | 0 NA | NA | NA | NA | NA |
| Hspd1-ps2 | 0 NA | NA | NA | NA | NA |
| Hspd1-ps5 | 0 NA | NA | NA | NA | NA |
| Hspe1-ps1 | 0 NA | NA | NA | NA | NA |
| Hspe1-ps3 | 0 NA | NA | NA | NA | NA |
| Hspe1-ps5 | 0 NA | NA | NA | NA | NA |
| Hspe1-ps6 | 0 NA | NA | NA | NA | NA |
| Htr1a     | 0 NA | NA | NA | NA | NA |
| Htr1f     | 0 NA | NA | NA | NA | NA |
| Htr3a     | 0 NA | NA | NA | NA | NA |
| Htr4      | 0 NA | NA | NA | NA | NA |
| Htr5a     | 0 NA | NA | NA | NA | NA |
| Htr6      | 0 NA | NA | NA | NA | NA |
| Hyal5     | 0 NA | NA | NA | NA | NA |
| Hyal6     | 0 NA | NA | NA | NA | NA |
| lbsp      | 0 NA | NA | NA | NA | NA |
| Ifna-ps1  | 0 NA | NA | NA | NA | NA |
| Ifna1     | 0 NA | NA | NA | NA | NA |
| Ifna11    | 0 NA | NA | NA | NA | NA |
| Ifna12    | 0 NA | NA | NA | NA | NA |
| Ifna13    | 0 NA | NA | NA | NA | NA |
| Ifna14    | 0 NA | NA | NA | NA | NA |
| Ifna15    | 0 NA | NA | NA | NA | NA |
| Ifna2     | 0 NA | NA | NA | NA | NA |
| Ifna4     | 0 NA | NA | NA | NA | NA |
| Ifna5     | 0 NA | NA | NA | NA | NA |
| Ifna7     | 0 NA | NA | NA | NA | NA |
| Ifna9     | 0 NA | NA | NA | NA | NA |
| Ifnab     | 0 NA | NA | NA | NA | NA |
| Ifnb1     | 0 NA | NA | NA | NA | NA |
| Ifne      | 0 NA | NA | NA | NA | NA |
| Ifnk      | 0 NA | NA | NA | NA | NA |
| Ifnl2     | 0 NA | NA | NA | NA | NA |
| Ifnl3     | 0 NA | NA | NA | NA | NA |
| Igbp1b    | 0 NA | NA | NA | NA | NA |
| Igfl3     | 0 NA | NA | NA | NA | NA |
| Ighd1-1   | 0 NA | NA | NA | NA | NA |
| Ighd2-3   | 0 NA | NA | NA | NA | NA |
| Ighd2-4   | 0 NA | NA | NA | NA | NA |
| Ighd2-5   | 0 NA | NA | NA | NA | NA |
| Ighd2-6   | 0 NA | NA | NA | NA | NA |
| Ighd2-7   | 0 NA | NA | NA | NA | NA |
| Ighd2-8   | 0 NA | NA | NA | NA | NA |
| Ighd3-1   | 0 NA | NA | NA | NA | NA |
| Ighd3-2   | 0 NA | NA | NA | NA | NA |
| Ighd4-1   | 0 NA | NA | NA | NA | NA |
| Ighd5-1   | 0 NA | NA | NA | NA | NA |
| Ighd5-2   | 0 NA | NA | NA | NA | NA |
| Ighd5-3   | 0 NA | NA | NA | NA | NA |
| Ighd5-4   | 0 NA | NA | NA | NA | NA |



|            |      |    |    |    |    |
|------------|------|----|----|----|----|
| Ighd5-5    | 0 NA | NA | NA | NA | NA |
| Ighd5-6    | 0 NA | NA | NA | NA | NA |
| Ighd5-7    | 0 NA | NA | NA | NA | NA |
| Ighd5-8    | 0 NA | NA | NA | NA | NA |
| Ighd6-1    | 0 NA | NA | NA | NA | NA |
| Ighd6-2    | 0 NA | NA | NA | NA | NA |
| Ighv1-1    | 0 NA | NA | NA | NA | NA |
| Ighv1-10   | 0 NA | NA | NA | NA | NA |
| Ighv1-13   | 0 NA | NA | NA | NA | NA |
| Ighv1-16   | 0 NA | NA | NA | NA | NA |
| Ighv1-17   | 0 NA | NA | NA | NA | NA |
| Ighv1-17-1 | 0 NA | NA | NA | NA | NA |
| Ighv1-2    | 0 NA | NA | NA | NA | NA |
| Ighv1-21   | 0 NA | NA | NA | NA | NA |
| Ighv1-21-1 | 0 NA | NA | NA | NA | NA |
| Ighv1-24   | 0 NA | NA | NA | NA | NA |
| Ighv1-27   | 0 NA | NA | NA | NA | NA |
| Ighv1-28   | 0 NA | NA | NA | NA | NA |
| Ighv1-29   | 0 NA | NA | NA | NA | NA |
| Ighv1-3    | 0 NA | NA | NA | NA | NA |
| Ighv1-30   | 0 NA | NA | NA | NA | NA |
| Ighv1-32   | 0 NA | NA | NA | NA | NA |
| Ighv1-33   | 0 NA | NA | NA | NA | NA |
| Ighv1-38   | 0 NA | NA | NA | NA | NA |
| Ighv1-40   | 0 NA | NA | NA | NA | NA |
| Ighv1-41   | 0 NA | NA | NA | NA | NA |
| Ighv1-43   | 0 NA | NA | NA | NA | NA |
| Ighv1-44   | 0 NA | NA | NA | NA | NA |
| Ighv1-45   | 0 NA | NA | NA | NA | NA |
| Ighv1-46   | 0 NA | NA | NA | NA | NA |
| Ighv1-48   | 0 NA | NA | NA | NA | NA |
| Ighv1-49   | 0 NA | NA | NA | NA | NA |
| Ighv1-51   | 0 NA | NA | NA | NA | NA |
| Ighv1-57   | 0 NA | NA | NA | NA | NA |
| Ighv1-6    | 0 NA | NA | NA | NA | NA |
| Ighv1-62   | 0 NA | NA | NA | NA | NA |
| Ighv1-62-1 | 0 NA | NA | NA | NA | NA |
| Ighv1-62-3 | 0 NA | NA | NA | NA | NA |
| Ighv1-65   | 0 NA | NA | NA | NA | NA |
| Ighv1-67   | 0 NA | NA | NA | NA | NA |
| Ighv1-68   | 0 NA | NA | NA | NA | NA |
| Ighv1-70   | 0 NA | NA | NA | NA | NA |
| Ighv1-73   | 0 NA | NA | NA | NA | NA |
| Ighv1-79   | 0 NA | NA | NA | NA | NA |
| Ighv1-8    | 0 NA | NA | NA | NA | NA |
| Ighv1-83   | 0 NA | NA | NA | NA | NA |
| Ighv1-86   | 0 NA | NA | NA | NA | NA |
| Ighv10-2   | 0 NA | NA | NA | NA | NA |
| Ighv10-4   | 0 NA | NA | NA | NA | NA |
| Ighv11-1   | 0 NA | NA | NA | NA | NA |
| Ighv12-1   | 0 NA | NA | NA | NA | NA |
| Ighv12-2   | 0 NA | NA | NA | NA | NA |
| Ighv13-1   | 0 NA | NA | NA | NA | NA |
| Ighv15-1   | 0 NA | NA | NA | NA | NA |
| Ighv16-1   | 0 NA | NA | NA | NA | NA |
| Ighv2-1    | 0 NA | NA | NA | NA | NA |
| Ighv2-7    | 0 NA | NA | NA | NA | NA |
| Ighv2-8    | 0 NA | NA | NA | NA | NA |
| Ighv3-2    | 0 NA | NA | NA | NA | NA |
| Ighv3-3    | 0 NA | NA | NA | NA | NA |
| Ighv3-4    | 0 NA | NA | NA | NA | NA |
| Ighv3-7    | 0 NA | NA | NA | NA | NA |
| Ighv4-2    | 0 NA | NA | NA | NA | NA |
| Ighv5-1    | 0 NA | NA | NA | NA | NA |
| Ighv5-10   | 0 NA | NA | NA | NA | NA |
| Ighv5-11   | 0 NA | NA | NA | NA | NA |

|              |      |    |    |    |    |
|--------------|------|----|----|----|----|
| Ighv5-12-4   | 0 NA | NA | NA | NA | NA |
| Ighv5-13     | 0 NA | NA | NA | NA | NA |
| Ighv5-18     | 0 NA | NA | NA | NA | NA |
| Ighv5-19     | 0 NA | NA | NA | NA | NA |
| Ighv5-21     | 0 NA | NA | NA | NA | NA |
| Ighv5-3      | 0 NA | NA | NA | NA | NA |
| Ighv5-5      | 0 NA | NA | NA | NA | NA |
| Ighv5-7      | 0 NA | NA | NA | NA | NA |
| Ighv5-8      | 0 NA | NA | NA | NA | NA |
| Ighv6-1      | 0 NA | NA | NA | NA | NA |
| Ighv6-2      | 0 NA | NA | NA | NA | NA |
| Ighv6-4      | 0 NA | NA | NA | NA | NA |
| Ighv6-5      | 0 NA | NA | NA | NA | NA |
| Ighv6-7      | 0 NA | NA | NA | NA | NA |
| Ighv7-2      | 0 NA | NA | NA | NA | NA |
| Ighv8-1      | 0 NA | NA | NA | NA | NA |
| Ighv8-10     | 0 NA | NA | NA | NA | NA |
| Ighv8-11     | 0 NA | NA | NA | NA | NA |
| Ighv8-13     | 0 NA | NA | NA | NA | NA |
| Ighv8-14     | 0 NA | NA | NA | NA | NA |
| Ighv8-15     | 0 NA | NA | NA | NA | NA |
| Ighv8-16     | 0 NA | NA | NA | NA | NA |
| Ighv8-2      | 0 NA | NA | NA | NA | NA |
| Ighv8-3      | 0 NA | NA | NA | NA | NA |
| Ighv8-4      | 0 NA | NA | NA | NA | NA |
| Ighv8-6      | 0 NA | NA | NA | NA | NA |
| Ighv8-7      | 0 NA | NA | NA | NA | NA |
| Ighv8-9      | 0 NA | NA | NA | NA | NA |
| Igkv1-108    | 0 NA | NA | NA | NA | NA |
| Igkv1-131    | 0 NA | NA | NA | NA | NA |
| Igkv1-132    | 0 NA | NA | NA | NA | NA |
| Igkv1-136    | 0 NA | NA | NA | NA | NA |
| Igkv1-35     | 0 NA | NA | NA | NA | NA |
| Igkv11-106   | 0 NA | NA | NA | NA | NA |
| Igkv11-118   | 0 NA | NA | NA | NA | NA |
| Igkv12-40    | 0 NA | NA | NA | NA | NA |
| Igkv12-42    | 0 NA | NA | NA | NA | NA |
| Igkv12-49    | 0 NA | NA | NA | NA | NA |
| Igkv12-66    | 0 NA | NA | NA | NA | NA |
| Igkv12-67    | 0 NA | NA | NA | NA | NA |
| Igkv13-54-1  | 0 NA | NA | NA | NA | NA |
| Igkv13-55-1  | 0 NA | NA | NA | NA | NA |
| Igkv13-56-1  | 0 NA | NA | NA | NA | NA |
| Igkv13-57-1  | 0 NA | NA | NA | NA | NA |
| Igkv13-57-2  | 0 NA | NA | NA | NA | NA |
| Igkv13-61-1  | 0 NA | NA | NA | NA | NA |
| Igkv13-62-1  | 0 NA | NA | NA | NA | NA |
| Igkv13-64    | 0 NA | NA | NA | NA | NA |
| Igkv13-71-1  | 0 NA | NA | NA | NA | NA |
| Igkv13-73-1  | 0 NA | NA | NA | NA | NA |
| Igkv13-74-1  | 0 NA | NA | NA | NA | NA |
| Igkv13-76    | 0 NA | NA | NA | NA | NA |
| Igkv13-78-1  | 0 NA | NA | NA | NA | NA |
| Igkv13-80-1  | 0 NA | NA | NA | NA | NA |
| Igkv13-82    | 0 NA | NA | NA | NA | NA |
| Igkv13-87    | 0 NA | NA | NA | NA | NA |
| Igkv14-118-1 | 0 NA | NA | NA | NA | NA |
| Igkv14-118-2 | 0 NA | NA | NA | NA | NA |
| Igkv14-126-1 | 0 NA | NA | NA | NA | NA |
| Igkv14-134-1 | 0 NA | NA | NA | NA | NA |
| Igkv15-101   | 0 NA | NA | NA | NA | NA |
| Igkv15-101-1 | 0 NA | NA | NA | NA | NA |
| Igkv15-102   | 0 NA | NA | NA | NA | NA |
| Igkv15-97    | 0 NA | NA | NA | NA | NA |
| Igkv17-134   | 0 NA | NA | NA | NA | NA |
| Igkv18-36    | 0 NA | NA | NA | NA | NA |

|              |      |    |    |    |    |
|--------------|------|----|----|----|----|
| Igkv2-105    | 0 NA | NA | NA | NA | NA |
| Igkv2-107    | 0 NA | NA | NA | NA | NA |
| Igkv2-113    | 0 NA | NA | NA | NA | NA |
| Igkv2-93-1   | 0 NA | NA | NA | NA | NA |
| Igkv2-95-1   | 0 NA | NA | NA | NA | NA |
| Igkv2-95-2   | 0 NA | NA | NA | NA | NA |
| Igkv20-101-2 | 0 NA | NA | NA | NA | NA |
| Igkv3-11     | 0 NA | NA | NA | NA | NA |
| Igkv3-12-1   | 0 NA | NA | NA | NA | NA |
| Igkv3-6      | 0 NA | NA | NA | NA | NA |
| Igkv3-8      | 0 NA | NA | NA | NA | NA |
| Igkv4-56     | 0 NA | NA | NA | NA | NA |
| Igkv4-60     | 0 NA | NA | NA | NA | NA |
| Igkv4-65     | 0 NA | NA | NA | NA | NA |
| Igkv4-75     | 0 NA | NA | NA | NA | NA |
| Igkv4-77     | 0 NA | NA | NA | NA | NA |
| Igkv4-81     | 0 NA | NA | NA | NA | NA |
| Igkv4-83     | 0 NA | NA | NA | NA | NA |
| Igkv5-40-1   | 0 NA | NA | NA | NA | NA |
| Igkv7-33     | 0 NA | NA | NA | NA | NA |
| Igkv8-22     | 0 NA | NA | NA | NA | NA |
| Igkv8-26     | 0 NA | NA | NA | NA | NA |
| Igkv8-31     | 0 NA | NA | NA | NA | NA |
| Igkv9-119    | 0 NA | NA | NA | NA | NA |
| Igkv9-128    | 0 NA | NA | NA | NA | NA |
| Ig1c4        | 0 NA | NA | NA | NA | NA |
| Iglj1        | 0 NA | NA | NA | NA | NA |
| Iglj2        | 0 NA | NA | NA | NA | NA |
| Iglj3        | 0 NA | NA | NA | NA | NA |
| Iglj4        | 0 NA | NA | NA | NA | NA |
| Il17b        | 0 NA | NA | NA | NA | NA |
| Il17c        | 0 NA | NA | NA | NA | NA |
| Il1f10       | 0 NA | NA | NA | NA | NA |
| Il1f5        | 0 NA | NA | NA | NA | NA |
| Il1f6        | 0 NA | NA | NA | NA | NA |
| Il1f8        | 0 NA | NA | NA | NA | NA |
| Il20         | 0 NA | NA | NA | NA | NA |
| Il22         | 0 NA | NA | NA | NA | NA |
| Il24         | 0 NA | NA | NA | NA | NA |
| Il25         | 0 NA | NA | NA | NA | NA |
| Il3          | 0 NA | NA | NA | NA | NA |
| Il31         | 0 NA | NA | NA | NA | NA |
| Il9          | 0 NA | NA | NA | NA | NA |
| Itifb        | 0 NA | NA | NA | NA | NA |
| Impdh2-ps    | 0 NA | NA | NA | NA | NA |
| Ins1         | 0 NA | NA | NA | NA | NA |
| Insm2        | 0 NA | NA | NA | NA | NA |
| Iqca1l       | 0 NA | NA | NA | NA | NA |
| Iqcf1        | 0 NA | NA | NA | NA | NA |
| Iqcf4        | 0 NA | NA | NA | NA | NA |
| Iqcf5        | 0 NA | NA | NA | NA | NA |
| Iqcf6        | 0 NA | NA | NA | NA | NA |
| Iqcj         | 0 NA | NA | NA | NA | NA |
| Iqcm         | 0 NA | NA | NA | NA | NA |
| Iqschfp      | 0 NA | NA | NA | NA | NA |
| Irs4         | 0 NA | NA | NA | NA | NA |
| Irx4         | 0 NA | NA | NA | NA | NA |
| Isl1         | 0 NA | NA | NA | NA | NA |
| Isx          | 0 NA | NA | NA | NA | NA |
| Itih5l-ps    | 0 NA | NA | NA | NA | NA |
| Itln1        | 0 NA | NA | NA | NA | NA |
| Itpa-ps2     | 0 NA | NA | NA | NA | NA |
| Itpa-ps3     | 0 NA | NA | NA | NA | NA |
| Itprid1      | 0 NA | NA | NA | NA | NA |
| Izumo2       | 0 NA | NA | NA | NA | NA |
| Izumo3       | 0 NA | NA | NA | NA | NA |

|            |      |    |    |    |    |
|------------|------|----|----|----|----|
| Jhy        | 0 NA | NA | NA | NA | NA |
| Kap        | 0 NA | NA | NA | NA | NA |
| Kars-ps1   | 0 NA | NA | NA | NA | NA |
| Kat2b-ps   | 0 NA | NA | NA | NA | NA |
| Kat6b-ps2  | 0 NA | NA | NA | NA | NA |
| Kcna1      | 0 NA | NA | NA | NA | NA |
| Kcna10     | 0 NA | NA | NA | NA | NA |
| Kcna4      | 0 NA | NA | NA | NA | NA |
| Kcnd2      | 0 NA | NA | NA | NA | NA |
| Kcne1      | 0 NA | NA | NA | NA | NA |
| Kcnf1      | 0 NA | NA | NA | NA | NA |
| Kcng1      | 0 NA | NA | NA | NA | NA |
| Kcnh4      | 0 NA | NA | NA | NA | NA |
| Kcnh5      | 0 NA | NA | NA | NA | NA |
| Kcnj1      | 0 NA | NA | NA | NA | NA |
| Kcnj13     | 0 NA | NA | NA | NA | NA |
| Kcnj6      | 0 NA | NA | NA | NA | NA |
| Kcnk15     | 0 NA | NA | NA | NA | NA |
| Kcnk18     | 0 NA | NA | NA | NA | NA |
| Kcns2      | 0 NA | NA | NA | NA | NA |
| Kcnv1      | 0 NA | NA | NA | NA | NA |
| Kcnv2      | 0 NA | NA | NA | NA | NA |
| Kctd16     | 0 NA | NA | NA | NA | NA |
| Kctd4      | 0 NA | NA | NA | NA | NA |
| Kctd8      | 0 NA | NA | NA | NA | NA |
| Kel        | 0 NA | NA | NA | NA | NA |
| Kera       | 0 NA | NA | NA | NA | NA |
| Khdc1c     | 0 NA | NA | NA | NA | NA |
| Kif22-ps   | 0 NA | NA | NA | NA | NA |
| Kif2b      | 0 NA | NA | NA | NA | NA |
| Kif4-ps    | 0 NA | NA | NA | NA | NA |
| Kifc5c-ps  | 0 NA | NA | NA | NA | NA |
| Kir3dl1    | 0 NA | NA | NA | NA | NA |
| Kir3dl2    | 0 NA | NA | NA | NA | NA |
| Kiss1      | 0 NA | NA | NA | NA | NA |
| Klf14      | 0 NA | NA | NA | NA | NA |
| Klf17      | 0 NA | NA | NA | NA | NA |
| Klhl34     | 0 NA | NA | NA | NA | NA |
| Klk10      | 0 NA | NA | NA | NA | NA |
| Klk11      | 0 NA | NA | NA | NA | NA |
| Klk12      | 0 NA | NA | NA | NA | NA |
| Klk13      | 0 NA | NA | NA | NA | NA |
| Klk15      | 0 NA | NA | NA | NA | NA |
| Klk1b1     | 0 NA | NA | NA | NA | NA |
| Klk1b10-ps | 0 NA | NA | NA | NA | NA |
| Klk1b12-ps | 0 NA | NA | NA | NA | NA |
| Klk1b14-ps | 0 NA | NA | NA | NA | NA |
| Klk1b15-ps | 0 NA | NA | NA | NA | NA |
| Klk1b16    | 0 NA | NA | NA | NA | NA |
| Klk1b18-ps | 0 NA | NA | NA | NA | NA |
| Klk1b19-ps | 0 NA | NA | NA | NA | NA |
| Klk1b2-ps  | 0 NA | NA | NA | NA | NA |
| Klk1b21    | 0 NA | NA | NA | NA | NA |
| Klk1b22    | 0 NA | NA | NA | NA | NA |
| Klk1b23-ps | 0 NA | NA | NA | NA | NA |
| Klk1b24    | 0 NA | NA | NA | NA | NA |
| Klk1b26    | 0 NA | NA | NA | NA | NA |
| Klk1b28-ps | 0 NA | NA | NA | NA | NA |
| Klk1b3     | 0 NA | NA | NA | NA | NA |
| Klk1b8     | 0 NA | NA | NA | NA | NA |
| Klk2-ps    | 0 NA | NA | NA | NA | NA |
| Klk4       | 0 NA | NA | NA | NA | NA |
| Klk5       | 0 NA | NA | NA | NA | NA |
| Klk6       | 0 NA | NA | NA | NA | NA |
| Klk9       | 0 NA | NA | NA | NA | NA |
| Klra11-ps  | 0 NA | NA | NA | NA | NA |

|            |      |    |    |    |    |
|------------|------|----|----|----|----|
| Kpna7      | 0 NA | NA | NA | NA | NA |
| Kprp       | 0 NA | NA | NA | NA | NA |
| Krt1       | 0 NA | NA | NA | NA | NA |
| Krt13      | 0 NA | NA | NA | NA | NA |
| Krt16      | 0 NA | NA | NA | NA | NA |
| Krt2       | 0 NA | NA | NA | NA | NA |
| Krt24      | 0 NA | NA | NA | NA | NA |
| Krt27      | 0 NA | NA | NA | NA | NA |
| Krt31      | 0 NA | NA | NA | NA | NA |
| Krt32      | 0 NA | NA | NA | NA | NA |
| Krt33a     | 0 NA | NA | NA | NA | NA |
| Krt33b     | 0 NA | NA | NA | NA | NA |
| Krt34      | 0 NA | NA | NA | NA | NA |
| Krt36      | 0 NA | NA | NA | NA | NA |
| Krt39      | 0 NA | NA | NA | NA | NA |
| Krt40      | 0 NA | NA | NA | NA | NA |
| Krt71      | 0 NA | NA | NA | NA | NA |
| Krt72      | 0 NA | NA | NA | NA | NA |
| Krt73      | 0 NA | NA | NA | NA | NA |
| Krt74      | 0 NA | NA | NA | NA | NA |
| Krt75      | 0 NA | NA | NA | NA | NA |
| Krt76      | 0 NA | NA | NA | NA | NA |
| Krt77      | 0 NA | NA | NA | NA | NA |
| Krt8-ps    | 0 NA | NA | NA | NA | NA |
| Krt81      | 0 NA | NA | NA | NA | NA |
| Krt82      | 0 NA | NA | NA | NA | NA |
| Krt9       | 0 NA | NA | NA | NA | NA |
| Krt90      | 0 NA | NA | NA | NA | NA |
| Krtap1-3   | 0 NA | NA | NA | NA | NA |
| Krtap1-4   | 0 NA | NA | NA | NA | NA |
| Krtap10-10 | 0 NA | NA | NA | NA | NA |
| Krtap10-4  | 0 NA | NA | NA | NA | NA |
| Krtap11-1  | 0 NA | NA | NA | NA | NA |
| Krtap12-1  | 0 NA | NA | NA | NA | NA |
| Krtap13    | 0 NA | NA | NA | NA | NA |
| Krtap13-1  | 0 NA | NA | NA | NA | NA |
| Krtap14    | 0 NA | NA | NA | NA | NA |
| Krtap15    | 0 NA | NA | NA | NA | NA |
| Krtap16-1  | 0 NA | NA | NA | NA | NA |
| Krtap16-3  | 0 NA | NA | NA | NA | NA |
| Krtap17-1  | 0 NA | NA | NA | NA | NA |
| Krtap19-1  | 0 NA | NA | NA | NA | NA |
| Krtap19-2  | 0 NA | NA | NA | NA | NA |
| Krtap19-3  | 0 NA | NA | NA | NA | NA |
| Krtap19-4  | 0 NA | NA | NA | NA | NA |
| Krtap19-5  | 0 NA | NA | NA | NA | NA |
| Krtap19-9a | 0 NA | NA | NA | NA | NA |
| Krtap19-9b | 0 NA | NA | NA | NA | NA |
| Krtap2-4   | 0 NA | NA | NA | NA | NA |
| Krtap20-2  | 0 NA | NA | NA | NA | NA |
| Krtap21-1  | 0 NA | NA | NA | NA | NA |
| Krtap22-2  | 0 NA | NA | NA | NA | NA |
| Krtap24-1  | 0 NA | NA | NA | NA | NA |
| Krtap26-1  | 0 NA | NA | NA | NA | NA |
| Krtap27-1  | 0 NA | NA | NA | NA | NA |
| Krtap28-10 | 0 NA | NA | NA | NA | NA |
| Krtap28-13 | 0 NA | NA | NA | NA | NA |
| Krtap29-1  | 0 NA | NA | NA | NA | NA |
| Krtap3-1   | 0 NA | NA | NA | NA | NA |
| Krtap3-3   | 0 NA | NA | NA | NA | NA |
| Krtap31-1  | 0 NA | NA | NA | NA | NA |
| Krtap31-2  | 0 NA | NA | NA | NA | NA |
| Krtap4-1   | 0 NA | NA | NA | NA | NA |
| Krtap4-13  | 0 NA | NA | NA | NA | NA |
| Krtap4-16  | 0 NA | NA | NA | NA | NA |
| Krtap4-2   | 0 NA | NA | NA | NA | NA |

|            |      |    |    |    |    |
|------------|------|----|----|----|----|
| Krtap4-6   | 0 NA | NA | NA | NA | NA |
| Krtap4-7   | 0 NA | NA | NA | NA | NA |
| Krtap4-8   | 0 NA | NA | NA | NA | NA |
| Krtap4-9   | 0 NA | NA | NA | NA | NA |
| Krtap5-1   | 0 NA | NA | NA | NA | NA |
| Krtap5-2   | 0 NA | NA | NA | NA | NA |
| Krtap5-3   | 0 NA | NA | NA | NA | NA |
| Krtap5-4   | 0 NA | NA | NA | NA | NA |
| Krtap5-5   | 0 NA | NA | NA | NA | NA |
| Krtap6-1   | 0 NA | NA | NA | NA | NA |
| Krtap6-2   | 0 NA | NA | NA | NA | NA |
| Krtap6-3   | 0 NA | NA | NA | NA | NA |
| Krtap6-5   | 0 NA | NA | NA | NA | NA |
| Krtap7-1   | 0 NA | NA | NA | NA | NA |
| Krtap8-1   | 0 NA | NA | NA | NA | NA |
| Krtap9-1   | 0 NA | NA | NA | NA | NA |
| Krtap9-3   | 0 NA | NA | NA | NA | NA |
| Krtap9-5   | 0 NA | NA | NA | NA | NA |
| Krtdap     | 0 NA | NA | NA | NA | NA |
| Lamr1-ps1  | 0 NA | NA | NA | NA | NA |
| Lbhd2      | 0 NA | NA | NA | NA | NA |
| Lbx1       | 0 NA | NA | NA | NA | NA |
| Lce1a1     | 0 NA | NA | NA | NA | NA |
| Lce1a2     | 0 NA | NA | NA | NA | NA |
| Lce1b      | 0 NA | NA | NA | NA | NA |
| Lce1d      | 0 NA | NA | NA | NA | NA |
| Lce1e      | 0 NA | NA | NA | NA | NA |
| Lce1g      | 0 NA | NA | NA | NA | NA |
| Lce1h      | 0 NA | NA | NA | NA | NA |
| Lce1i      | 0 NA | NA | NA | NA | NA |
| Lce1j      | 0 NA | NA | NA | NA | NA |
| Lce1k      | 0 NA | NA | NA | NA | NA |
| Lce1l      | 0 NA | NA | NA | NA | NA |
| Lce1m      | 0 NA | NA | NA | NA | NA |
| Lce3a      | 0 NA | NA | NA | NA | NA |
| Lce3b      | 0 NA | NA | NA | NA | NA |
| Lce3c      | 0 NA | NA | NA | NA | NA |
| Lce3d      | 0 NA | NA | NA | NA | NA |
| Lce3e      | 0 NA | NA | NA | NA | NA |
| Lce3f      | 0 NA | NA | NA | NA | NA |
| Lcn11      | 0 NA | NA | NA | NA | NA |
| Lcn3       | 0 NA | NA | NA | NA | NA |
| Ldc1       | 0 NA | NA | NA | NA | NA |
| Ldhc       | 0 NA | NA | NA | NA | NA |
| Ldlrad2    | 0 NA | NA | NA | NA | NA |
| Ldoc1      | 0 NA | NA | NA | NA | NA |
| Lelp1      | 0 NA | NA | NA | NA | NA |
| Lexm       | 0 NA | NA | NA | NA | NA |
| Lgals1-ps1 | 0 NA | NA | NA | NA | NA |
| Lhcgr      | 0 NA | NA | NA | NA | NA |
| Lhx8       | 0 NA | NA | NA | NA | NA |
| Lim2       | 0 NA | NA | NA | NA | NA |
| Lingo2     | 0 NA | NA | NA | NA | NA |
| Lipf       | 0 NA | NA | NA | NA | NA |
| Lipi       | 0 NA | NA | NA | NA | NA |
| Lipk       | 0 NA | NA | NA | NA | NA |
| Lipm       | 0 NA | NA | NA | NA | NA |
| Lipo1      | 0 NA | NA | NA | NA | NA |
| Lipo2      | 0 NA | NA | NA | NA | NA |
| Lipo4      | 0 NA | NA | NA | NA | NA |
| Lipo5      | 0 NA | NA | NA | NA | NA |
| Lkaaeear1  | 0 NA | NA | NA | NA | NA |
| Llcf1      | 0 NA | NA | NA | NA | NA |
| Llph-ps1   | 0 NA | NA | NA | NA | NA |
| Lmo3       | 0 NA | NA | NA | NA | NA |
| Lnp1       | 0 NA | NA | NA | NA | NA |

|              |      |    |    |    |    |
|--------------|------|----|----|----|----|
| LO018689.3   | 0 NA | NA | NA | NA | NA |
| LO018689.5   | 0 NA | NA | NA | NA | NA |
| LO018689.8   | 0 NA | NA | NA | NA | NA |
| LOC102637012 | 0 NA | NA | NA | NA | NA |
| LOC667541    | 0 NA | NA | NA | NA | NA |
| Loxhd1       | 0 NA | NA | NA | NA | NA |
| Lpo          | 0 NA | NA | NA | NA | NA |
| Lrhn2        | 0 NA | NA | NA | NA | NA |
| Lrrc10       | 0 NA | NA | NA | NA | NA |
| Lrrc30       | 0 NA | NA | NA | NA | NA |
| Lrrc37a      | 0 NA | NA | NA | NA | NA |
| Lrrc3c       | 0 NA | NA | NA | NA | NA |
| Lrrc43       | 0 NA | NA | NA | NA | NA |
| Lrrc52       | 0 NA | NA | NA | NA | NA |
| Lrrc72       | 0 NA | NA | NA | NA | NA |
| Lrrc74a      | 0 NA | NA | NA | NA | NA |
| Lrriq4       | 0 NA | NA | NA | NA | NA |
| Lrrtm2       | 0 NA | NA | NA | NA | NA |
| LT629147.2   | 0 NA | NA | NA | NA | NA |
| LT629147.3   | 0 NA | NA | NA | NA | NA |
| LT629147.4   | 0 NA | NA | NA | NA | NA |
| LT629148.1   | 0 NA | NA | NA | NA | NA |
| LT629148.10  | 0 NA | NA | NA | NA | NA |
| LT629148.11  | 0 NA | NA | NA | NA | NA |
| LT629148.12  | 0 NA | NA | NA | NA | NA |
| LT629148.4   | 0 NA | NA | NA | NA | NA |
| LT629148.5   | 0 NA | NA | NA | NA | NA |
| LT629148.6   | 0 NA | NA | NA | NA | NA |
| LT629148.7   | 0 NA | NA | NA | NA | NA |
| LT629148.9   | 0 NA | NA | NA | NA | NA |
| LT629149.2   | 0 NA | NA | NA | NA | NA |
| LT629149.3   | 0 NA | NA | NA | NA | NA |
| LT629149.4   | 0 NA | NA | NA | NA | NA |
| LT629150.1   | 0 NA | NA | NA | NA | NA |
| LT629150.2   | 0 NA | NA | NA | NA | NA |
| LT629151.1   | 0 NA | NA | NA | NA | NA |
| LT629151.10  | 0 NA | NA | NA | NA | NA |
| LT629151.3   | 0 NA | NA | NA | NA | NA |
| LT629151.4   | 0 NA | NA | NA | NA | NA |
| LT629151.7   | 0 NA | NA | NA | NA | NA |
| LT629151.8   | 0 NA | NA | NA | NA | NA |
| LT629152.1   | 0 NA | NA | NA | NA | NA |
| LT629152.2   | 0 NA | NA | NA | NA | NA |
| LT629153.1   | 0 NA | NA | NA | NA | NA |
| LT629153.2   | 0 NA | NA | NA | NA | NA |
| LT629153.3   | 0 NA | NA | NA | NA | NA |
| LT629153.5   | 0 NA | NA | NA | NA | NA |
| LT629154.1   | 0 NA | NA | NA | NA | NA |
| LT629154.2   | 0 NA | NA | NA | NA | NA |
| LT629154.3   | 0 NA | NA | NA | NA | NA |
| LT629154.6   | 0 NA | NA | NA | NA | NA |
| Luzp2        | 0 NA | NA | NA | NA | NA |
| Luzp4        | 0 NA | NA | NA | NA | NA |
| Ly6e-ps1     | 0 NA | NA | NA | NA | NA |
| Ly6g5c       | 0 NA | NA | NA | NA | NA |
| Lyg2         | 0 NA | NA | NA | NA | NA |
| Lypd10       | 0 NA | NA | NA | NA | NA |
| Lypd11       | 0 NA | NA | NA | NA | NA |
| Lypd2        | 0 NA | NA | NA | NA | NA |
| Lypd3        | 0 NA | NA | NA | NA | NA |
| Lypd4        | 0 NA | NA | NA | NA | NA |
| Lypd9        | 0 NA | NA | NA | NA | NA |
| Lyz1         | 0 NA | NA | NA | NA | NA |
| Lyz16        | 0 NA | NA | NA | NA | NA |
| M6pr-ps      | 0 NA | NA | NA | NA | NA |
| Mab2111      | 0 NA | NA | NA | NA | NA |

|             |   |    |    |    |    |    |
|-------------|---|----|----|----|----|----|
| Mael        | 0 | NA | NA | NA | NA | NA |
| Magea1      | 0 | NA | NA | NA | NA | NA |
| Magea10     | 0 | NA | NA | NA | NA | NA |
| Magea2      | 0 | NA | NA | NA | NA | NA |
| Magea3      | 0 | NA | NA | NA | NA | NA |
| Magea4      | 0 | NA | NA | NA | NA | NA |
| Magea5      | 0 | NA | NA | NA | NA | NA |
| Magea6      | 0 | NA | NA | NA | NA | NA |
| Magea7-ps   | 0 | NA | NA | NA | NA | NA |
| Magea8      | 0 | NA | NA | NA | NA | NA |
| Magea9-ps   | 0 | NA | NA | NA | NA | NA |
| Mageb1      | 0 | NA | NA | NA | NA | NA |
| Mageb10-ps  | 0 | NA | NA | NA | NA | NA |
| Mageb16-ps1 | 0 | NA | NA | NA | NA | NA |
| Mageb17-ps  | 0 | NA | NA | NA | NA | NA |
| Mageb18     | 0 | NA | NA | NA | NA | NA |
| Mageb2      | 0 | NA | NA | NA | NA | NA |
| Mageb4      | 0 | NA | NA | NA | NA | NA |
| Mageb5      | 0 | NA | NA | NA | NA | NA |
| Mageb6-ps   | 0 | NA | NA | NA | NA | NA |
| Mageb7-ps   | 0 | NA | NA | NA | NA | NA |
| Mageb8-ps   | 0 | NA | NA | NA | NA | NA |
| 11-Mar      | 0 | NA | NA | NA | NA | NA |
| Mark1-ps1   | 0 | NA | NA | NA | NA | NA |
| Mark1-ps2   | 0 | NA | NA | NA | NA | NA |
| Mark4-ps    | 0 | NA | NA | NA | NA | NA |
| Mbd3l1      | 0 | NA | NA | NA | NA | NA |
| Mc2r        | 0 | NA | NA | NA | NA | NA |
| Mc3r        | 0 | NA | NA | NA | NA | NA |
| Mc4r        | 0 | NA | NA | NA | NA | NA |
| Mcpt-ps1    | 0 | NA | NA | NA | NA | NA |
| Mcpt1       | 0 | NA | NA | NA | NA | NA |
| Mcpt2       | 0 | NA | NA | NA | NA | NA |
| Mcpt9       | 0 | NA | NA | NA | NA | NA |
| Mdk-ps1     | 0 | NA | NA | NA | NA | NA |
| Mei1        | 0 | NA | NA | NA | NA | NA |
| Meikin      | 0 | NA | NA | NA | NA | NA |
| Mepe        | 0 | NA | NA | NA | NA | NA |
| Mettl11b    | 0 | NA | NA | NA | NA | NA |
| Mfsd4b2     | 0 | NA | NA | NA | NA | NA |
| Mgat4d      | 0 | NA | NA | NA | NA | NA |
| Mgat4e      | 0 | NA | NA | NA | NA | NA |
| Mgat4f      | 0 | NA | NA | NA | NA | NA |
| Mif-ps3     | 0 | NA | NA | NA | NA | NA |
| Mif-ps7     | 0 | NA | NA | NA | NA | NA |
| Mill1       | 0 | NA | NA | NA | NA | NA |
| Mindy4b-ps  | 0 | NA | NA | NA | NA | NA |
| Minpp1-ps   | 0 | NA | NA | NA | NA | NA |
| Mkrn1-ps1   | 0 | NA | NA | NA | NA | NA |
| Mlnr-ps     | 0 | NA | NA | NA | NA | NA |
| Mmp1a       | 0 | NA | NA | NA | NA | NA |
| Mmp1b       | 0 | NA | NA | NA | NA | NA |
| Mmp21       | 0 | NA | NA | NA | NA | NA |
| Mnd1-ps     | 0 | NA | NA | NA | NA | NA |
| Mnx1        | 0 | NA | NA | NA | NA | NA |
| Mog         | 0 | NA | NA | NA | NA | NA |
| Morn3       | 0 | NA | NA | NA | NA | NA |
| Mos         | 0 | NA | NA | NA | NA | NA |
| Mov10l1     | 0 | NA | NA | NA | NA | NA |
| Moxd2       | 0 | NA | NA | NA | NA | NA |
| Mpc1-ps     | 0 | NA | NA | NA | NA | NA |
| Mptx1       | 0 | NA | NA | NA | NA | NA |
| Mptx2       | 0 | NA | NA | NA | NA | NA |
| Mrgpra1     | 0 | NA | NA | NA | NA | NA |
| Mrgpra14    | 0 | NA | NA | NA | NA | NA |
| Mrgpra18-ps | 0 | NA | NA | NA | NA | NA |



|             |      |    |    |    |    |
|-------------|------|----|----|----|----|
| Mrgpra2a    | 0 NA | NA | NA | NA | NA |
| Mrgpra3     | 0 NA | NA | NA | NA | NA |
| Mrgpra6     | 0 NA | NA | NA | NA | NA |
| Mrgpra9     | 0 NA | NA | NA | NA | NA |
| Mrgprb12-ps | 0 NA | NA | NA | NA | NA |
| Mrgprb13    | 0 NA | NA | NA | NA | NA |
| Mrgprb4     | 0 NA | NA | NA | NA | NA |
| Mrgprb5     | 0 NA | NA | NA | NA | NA |
| Mrgprb7-ps  | 0 NA | NA | NA | NA | NA |
| Mrgprb8     | 0 NA | NA | NA | NA | NA |
| Mrgprb9-ps  | 0 NA | NA | NA | NA | NA |
| Mrgprc1-ps  | 0 NA | NA | NA | NA | NA |
| Mrgprc3-ps  | 0 NA | NA | NA | NA | NA |
| Mrgprc4-ps  | 0 NA | NA | NA | NA | NA |
| Mrgprc7-ps  | 0 NA | NA | NA | NA | NA |
| Mrgprd      | 0 NA | NA | NA | NA | NA |
| Mrgprh      | 0 NA | NA | NA | NA | NA |
| Mrgprx1     | 0 NA | NA | NA | NA | NA |
| Mrgprx3-ps  | 0 NA | NA | NA | NA | NA |
| Mroh2b      | 0 NA | NA | NA | NA | NA |
| Mroh4       | 0 NA | NA | NA | NA | NA |
| Mroh9       | 0 NA | NA | NA | NA | NA |
| Mrpl48-ps   | 0 NA | NA | NA | NA | NA |
| Mrps36-ps1  | 0 NA | NA | NA | NA | NA |
| Mrps36-ps2  | 0 NA | NA | NA | NA | NA |
| Mrps36-ps3  | 0 NA | NA | NA | NA | NA |
| Mrto4-ps1   | 0 NA | NA | NA | NA | NA |
| Ms4a12      | 0 NA | NA | NA | NA | NA |
| Ms4a13      | 0 NA | NA | NA | NA | NA |
| Ms4a19      | 0 NA | NA | NA | NA | NA |
| Ms4a20      | 0 NA | NA | NA | NA | NA |
| Msgn1       | 0 NA | NA | NA | NA | NA |
| Mslnl       | 0 NA | NA | NA | NA | NA |
| Msemb       | 0 NA | NA | NA | NA | NA |
| Mstn        | 0 NA | NA | NA | NA | NA |
| Msx3        | 0 NA | NA | NA | NA | NA |
| Mthfr-ps1   | 0 NA | NA | NA | NA | NA |
| Mtnr1b      | 0 NA | NA | NA | NA | NA |
| Muc5b       | 0 NA | NA | NA | NA | NA |
| Muc12       | 0 NA | NA | NA | NA | NA |
| Mup-ps26    | 0 NA | NA | NA | NA | NA |
| Mup-ps28    | 0 NA | NA | NA | NA | NA |
| Mup-ps29    | 0 NA | NA | NA | NA | NA |
| Mycs        | 0 NA | NA | NA | NA | NA |
| Myf5        | 0 NA | NA | NA | NA | NA |
| Myf6        | 0 NA | NA | NA | NA | NA |
| Myh2        | 0 NA | NA | NA | NA | NA |
| Myh4        | 0 NA | NA | NA | NA | NA |
| My110       | 0 NA | NA | NA | NA | NA |
| My1f-ps     | 0 NA | NA | NA | NA | NA |
| Mymx        | 0 NA | NA | NA | NA | NA |
| Myo3a       | 0 NA | NA | NA | NA | NA |
| Myocos      | 0 NA | NA | NA | NA | NA |
| Myt1l       | 0 NA | NA | NA | NA | NA |
| Naa11       | 0 NA | NA | NA | NA | NA |
| Nanog-ps2   | 0 NA | NA | NA | NA | NA |
| Nanos2      | 0 NA | NA | NA | NA | NA |
| Nap1l2      | 0 NA | NA | NA | NA | NA |
| Nat3        | 0 NA | NA | NA | NA | NA |
| Ncr3-ps     | 0 NA | NA | NA | NA | NA |
| Ndufab1-ps  | 0 NA | NA | NA | NA | NA |
| Neu4        | 0 NA | NA | NA | NA | NA |
| Neurog1     | 0 NA | NA | NA | NA | NA |
| Neurog2     | 0 NA | NA | NA | NA | NA |
| Neurog3     | 0 NA | NA | NA | NA | NA |
| Nipsnap3a   | 0 NA | NA | NA | NA | NA |

|            |      |    |    |    |    |
|------------|------|----|----|----|----|
| Nkx1-1     | 0 NA | NA | NA | NA | NA |
| Nkx2-2     | 0 NA | NA | NA | NA | NA |
| Nkx2-4     | 0 NA | NA | NA | NA | NA |
| Nkx2-5     | 0 NA | NA | NA | NA | NA |
| Nkx6-2     | 0 NA | NA | NA | NA | NA |
| Nkx6-3     | 0 NA | NA | NA | NA | NA |
| Nlrp14     | 0 NA | NA | NA | NA | NA |
| Nlrp4b     | 0 NA | NA | NA | NA | NA |
| Nlrp4c     | 0 NA | NA | NA | NA | NA |
| Nlrp4d     | 0 NA | NA | NA | NA | NA |
| Nlrp4e     | 0 NA | NA | NA | NA | NA |
| Nlrp4f     | 0 NA | NA | NA | NA | NA |
| Nlrp4g     | 0 NA | NA | NA | NA | NA |
| Nlrp9a     | 0 NA | NA | NA | NA | NA |
| Nme8       | 0 NA | NA | NA | NA | NA |
| Nms        | 0 NA | NA | NA | NA | NA |
| Nmu        | 0 NA | NA | NA | NA | NA |
| Nmur1      | 0 NA | NA | NA | NA | NA |
| Noto       | 0 NA | NA | NA | NA | NA |
| Nox3       | 0 NA | NA | NA | NA | NA |
| Npas1      | 0 NA | NA | NA | NA | NA |
| Npas4      | 0 NA | NA | NA | NA | NA |
| Npcd       | 0 NA | NA | NA | NA | NA |
| Npffr2     | 0 NA | NA | NA | NA | NA |
| Nppa       | 0 NA | NA | NA | NA | NA |
| Npsr1      | 0 NA | NA | NA | NA | NA |
| Npvf       | 0 NA | NA | NA | NA | NA |
| Npy2r      | 0 NA | NA | NA | NA | NA |
| Npy5r      | 0 NA | NA | NA | NA | NA |
| Nras-ps2   | 0 NA | NA | NA | NA | NA |
| Nrsn1      | 0 NA | NA | NA | NA | NA |
| Nrsn2      | 0 NA | NA | NA | NA | NA |
| Nsa2-ps2   | 0 NA | NA | NA | NA | NA |
| Nt5c1b     | 0 NA | NA | NA | NA | NA |
| Nt5el      | 0 NA | NA | NA | NA | NA |
| Ntsr1      | 0 NA | NA | NA | NA | NA |
| Ntsr2      | 0 NA | NA | NA | NA | NA |
| Nudt16l2   | 0 NA | NA | NA | NA | NA |
| Nutm1      | 0 NA | NA | NA | NA | NA |
| Nutm2      | 0 NA | NA | NA | NA | NA |
| Nxph2      | 0 NA | NA | NA | NA | NA |
| Oas1f      | 0 NA | NA | NA | NA | NA |
| Oaz1-ps    | 0 NA | NA | NA | NA | NA |
| Oaz2-ps    | 0 NA | NA | NA | NA | NA |
| Obox1      | 0 NA | NA | NA | NA | NA |
| Obox2      | 0 NA | NA | NA | NA | NA |
| Obox3-ps1  | 0 NA | NA | NA | NA | NA |
| Obox3-ps2  | 0 NA | NA | NA | NA | NA |
| Obox3-ps3  | 0 NA | NA | NA | NA | NA |
| Obox3-ps4  | 0 NA | NA | NA | NA | NA |
| Obox3-ps5  | 0 NA | NA | NA | NA | NA |
| Obox3-ps6  | 0 NA | NA | NA | NA | NA |
| Obox3-ps8  | 0 NA | NA | NA | NA | NA |
| Obox4-ps1  | 0 NA | NA | NA | NA | NA |
| Obox4-ps10 | 0 NA | NA | NA | NA | NA |
| Obox4-ps11 | 0 NA | NA | NA | NA | NA |
| Obox4-ps12 | 0 NA | NA | NA | NA | NA |
| Obox4-ps13 | 0 NA | NA | NA | NA | NA |
| Obox4-ps15 | 0 NA | NA | NA | NA | NA |
| Obox4-ps16 | 0 NA | NA | NA | NA | NA |
| Obox4-ps17 | 0 NA | NA | NA | NA | NA |
| Obox4-ps18 | 0 NA | NA | NA | NA | NA |
| Obox4-ps19 | 0 NA | NA | NA | NA | NA |
| Obox4-ps20 | 0 NA | NA | NA | NA | NA |
| Obox4-ps21 | 0 NA | NA | NA | NA | NA |
| Obox4-ps22 | 0 NA | NA | NA | NA | NA |

|              |      |    |    |    |    |
|--------------|------|----|----|----|----|
| Obox4-ps24   | 0 NA | NA | NA | NA | NA |
| Obox4-ps25   | 0 NA | NA | NA | NA | NA |
| Obox4-ps26   | 0 NA | NA | NA | NA | NA |
| Obox4-ps27   | 0 NA | NA | NA | NA | NA |
| Obox4-ps29   | 0 NA | NA | NA | NA | NA |
| Obox4-ps30   | 0 NA | NA | NA | NA | NA |
| Obox4-ps31   | 0 NA | NA | NA | NA | NA |
| Obox4-ps32   | 0 NA | NA | NA | NA | NA |
| Obox4-ps33   | 0 NA | NA | NA | NA | NA |
| Obox4-ps34   | 0 NA | NA | NA | NA | NA |
| Obox4-ps36   | 0 NA | NA | NA | NA | NA |
| Obox4-ps37   | 0 NA | NA | NA | NA | NA |
| Obox4-ps38   | 0 NA | NA | NA | NA | NA |
| Obox4-ps39   | 0 NA | NA | NA | NA | NA |
| Obox4-ps4    | 0 NA | NA | NA | NA | NA |
| Obox4-ps5    | 0 NA | NA | NA | NA | NA |
| Obox4-ps6    | 0 NA | NA | NA | NA | NA |
| Obox4-ps7    | 0 NA | NA | NA | NA | NA |
| Obox4-ps8    | 0 NA | NA | NA | NA | NA |
| Obox4-ps9    | 0 NA | NA | NA | NA | NA |
| Obox5        | 0 NA | NA | NA | NA | NA |
| Obox6        | 0 NA | NA | NA | NA | NA |
| Obox6-ps1    | 0 NA | NA | NA | NA | NA |
| Obp1a        | 0 NA | NA | NA | NA | NA |
| Obp1b        | 0 NA | NA | NA | NA | NA |
| Obp2b        | 0 NA | NA | NA | NA | NA |
| Oc90         | 0 NA | NA | NA | NA | NA |
| Ocm          | 0 NA | NA | NA | NA | NA |
| Odam         | 0 NA | NA | NA | NA | NA |
| Odaph        | 0 NA | NA | NA | NA | NA |
| Odf1         | 0 NA | NA | NA | NA | NA |
| Odf311       | 0 NA | NA | NA | NA | NA |
| Odf312       | 0 NA | NA | NA | NA | NA |
| Olah         | 0 NA | NA | NA | NA | NA |
| Olfr5        | 0 NA | NA | NA | NA | NA |
| Olfr1001-ps1 | 0 NA | NA | NA | NA | NA |
| Olfr1002     | 0 NA | NA | NA | NA | NA |
| Olfr1003-ps1 | 0 NA | NA | NA | NA | NA |
| Olfr1004-ps1 | 0 NA | NA | NA | NA | NA |
| Olfr1005-ps1 | 0 NA | NA | NA | NA | NA |
| Olfr1006     | 0 NA | NA | NA | NA | NA |
| Olfr1007-ps1 | 0 NA | NA | NA | NA | NA |
| Olfr1008     | 0 NA | NA | NA | NA | NA |
| Olfr1010     | 0 NA | NA | NA | NA | NA |
| Olfr1013     | 0 NA | NA | NA | NA | NA |
| Olfr1015     | 0 NA | NA | NA | NA | NA |
| Olfr1016     | 0 NA | NA | NA | NA | NA |
| Olfr1017-ps1 | 0 NA | NA | NA | NA | NA |
| Olfr1021-ps1 | 0 NA | NA | NA | NA | NA |
| Olfr1022     | 0 NA | NA | NA | NA | NA |
| Olfr1024     | 0 NA | NA | NA | NA | NA |
| Olfr1025-ps1 | 0 NA | NA | NA | NA | NA |
| Olfr1026     | 0 NA | NA | NA | NA | NA |
| Olfr1027-ps1 | 0 NA | NA | NA | NA | NA |
| Olfr103      | 0 NA | NA | NA | NA | NA |
| Olfr1032     | 0 NA | NA | NA | NA | NA |
| Olfr1035-ps1 | 0 NA | NA | NA | NA | NA |
| Olfr1037     | 0 NA | NA | NA | NA | NA |
| Olfr1038-ps  | 0 NA | NA | NA | NA | NA |
| Olfr1040     | 0 NA | NA | NA | NA | NA |
| Olfr1041-ps1 | 0 NA | NA | NA | NA | NA |
| Olfr1043     | 0 NA | NA | NA | NA | NA |
| Olfr1045     | 0 NA | NA | NA | NA | NA |
| Olfr1046     | 0 NA | NA | NA | NA | NA |
| Olfr1049     | 0 NA | NA | NA | NA | NA |
| Olfr1050-ps1 | 0 NA | NA | NA | NA | NA |

|              |      |    |    |    |    |
|--------------|------|----|----|----|----|
| Olfr1051     | 0 NA | NA | NA | NA | NA |
| Olfr1052     | 0 NA | NA | NA | NA | NA |
| Olfr1053     | 0 NA | NA | NA | NA | NA |
| Olfr1054     | 0 NA | NA | NA | NA | NA |
| Olfr1055     | 0 NA | NA | NA | NA | NA |
| Olfr1056     | 0 NA | NA | NA | NA | NA |
| Olfr1058     | 0 NA | NA | NA | NA | NA |
| Olfr1059-ps1 | 0 NA | NA | NA | NA | NA |
| Olfr106-ps   | 0 NA | NA | NA | NA | NA |
| Olfr1060-ps1 | 0 NA | NA | NA | NA | NA |
| Olfr1061     | 0 NA | NA | NA | NA | NA |
| Olfr1063-ps1 | 0 NA | NA | NA | NA | NA |
| Olfr1064-ps1 | 0 NA | NA | NA | NA | NA |
| Olfr1065     | 0 NA | NA | NA | NA | NA |
| Olfr1066     | 0 NA | NA | NA | NA | NA |
| Olfr1069-ps1 | 0 NA | NA | NA | NA | NA |
| Olfr1070-ps1 | 0 NA | NA | NA | NA | NA |
| Olfr1073-ps1 | 0 NA | NA | NA | NA | NA |
| Olfr1075-ps1 | 0 NA | NA | NA | NA | NA |
| Olfr1076     | 0 NA | NA | NA | NA | NA |
| Olfr1077-ps1 | 0 NA | NA | NA | NA | NA |
| Olfr1078-ps1 | 0 NA | NA | NA | NA | NA |
| Olfr1079     | 0 NA | NA | NA | NA | NA |
| Olfr108      | 0 NA | NA | NA | NA | NA |
| Olfr1080     | 0 NA | NA | NA | NA | NA |
| Olfr1081-ps1 | 0 NA | NA | NA | NA | NA |
| Olfr1082     | 0 NA | NA | NA | NA | NA |
| Olfr1083-ps  | 0 NA | NA | NA | NA | NA |
| Olfr1084     | 0 NA | NA | NA | NA | NA |
| Olfr1086     | 0 NA | NA | NA | NA | NA |
| Olfr1088-ps1 | 0 NA | NA | NA | NA | NA |
| Olfr1089     | 0 NA | NA | NA | NA | NA |
| Olfr1091-ps1 | 0 NA | NA | NA | NA | NA |
| Olfr1092-ps1 | 0 NA | NA | NA | NA | NA |
| Olfr1093     | 0 NA | NA | NA | NA | NA |
| Olfr1094     | 0 NA | NA | NA | NA | NA |
| Olfr1095     | 0 NA | NA | NA | NA | NA |
| Olfr1098     | 0 NA | NA | NA | NA | NA |
| Olfr1099     | 0 NA | NA | NA | NA | NA |
| Olfr1101     | 0 NA | NA | NA | NA | NA |
| Olfr1102     | 0 NA | NA | NA | NA | NA |
| Olfr1103-ps1 | 0 NA | NA | NA | NA | NA |
| Olfr1104     | 0 NA | NA | NA | NA | NA |
| Olfr1107     | 0 NA | NA | NA | NA | NA |
| Olfr1108-ps1 | 0 NA | NA | NA | NA | NA |
| Olfr1111     | 0 NA | NA | NA | NA | NA |
| Olfr1112     | 0 NA | NA | NA | NA | NA |
| Olfr1113     | 0 NA | NA | NA | NA | NA |
| Olfr1114-ps1 | 0 NA | NA | NA | NA | NA |
| Olfr1115     | 0 NA | NA | NA | NA | NA |
| Olfr1117-ps1 | 0 NA | NA | NA | NA | NA |
| Olfr1119-ps1 | 0 NA | NA | NA | NA | NA |
| Olfr112      | 0 NA | NA | NA | NA | NA |
| Olfr1121     | 0 NA | NA | NA | NA | NA |
| Olfr1126     | 0 NA | NA | NA | NA | NA |
| Olfr1127-ps1 | 0 NA | NA | NA | NA | NA |
| Olfr1128     | 0 NA | NA | NA | NA | NA |
| Olfr1130     | 0 NA | NA | NA | NA | NA |
| Olfr1131     | 0 NA | NA | NA | NA | NA |
| Olfr1132     | 0 NA | NA | NA | NA | NA |
| Olfr1133     | 0 NA | NA | NA | NA | NA |
| Olfr1134     | 0 NA | NA | NA | NA | NA |
| Olfr1136     | 0 NA | NA | NA | NA | NA |
| Olfr1139-ps1 | 0 NA | NA | NA | NA | NA |
| Olfr114      | 0 NA | NA | NA | NA | NA |
| Olfr1140     | 0 NA | NA | NA | NA | NA |

|              |      |    |    |    |    |
|--------------|------|----|----|----|----|
| Olfr1141     | 0 NA | NA | NA | NA | NA |
| Olfr1142-ps1 | 0 NA | NA | NA | NA | NA |
| Olfr1143     | 0 NA | NA | NA | NA | NA |
| Olfr1144-ps1 | 0 NA | NA | NA | NA | NA |
| Olfr1145     | 0 NA | NA | NA | NA | NA |
| Olfr1146-ps1 | 0 NA | NA | NA | NA | NA |
| Olfr1147-ps1 | 0 NA | NA | NA | NA | NA |
| Olfr1148     | 0 NA | NA | NA | NA | NA |
| Olfr1149-ps1 | 0 NA | NA | NA | NA | NA |
| Olfr1151     | 0 NA | NA | NA | NA | NA |
| Olfr1153     | 0 NA | NA | NA | NA | NA |
| Olfr1155     | 0 NA | NA | NA | NA | NA |
| Olfr1158     | 0 NA | NA | NA | NA | NA |
| Olfr1159-ps1 | 0 NA | NA | NA | NA | NA |
| Olfr1163     | 0 NA | NA | NA | NA | NA |
| Olfr1164     | 0 NA | NA | NA | NA | NA |
| Olfr1165-ps  | 0 NA | NA | NA | NA | NA |
| Olfr1166     | 0 NA | NA | NA | NA | NA |
| Olfr1168     | 0 NA | NA | NA | NA | NA |
| Olfr1169-ps1 | 0 NA | NA | NA | NA | NA |
| Olfr1171-ps1 | 0 NA | NA | NA | NA | NA |
| Olfr1172-ps1 | 0 NA | NA | NA | NA | NA |
| Olfr1174     | 0 NA | NA | NA | NA | NA |
| Olfr1176     | 0 NA | NA | NA | NA | NA |
| Olfr1177-ps  | 0 NA | NA | NA | NA | NA |
| Olfr1179     | 0 NA | NA | NA | NA | NA |
| Olfr1180     | 0 NA | NA | NA | NA | NA |
| Olfr1182     | 0 NA | NA | NA | NA | NA |
| Olfr1184     | 0 NA | NA | NA | NA | NA |
| Olfr1185-ps1 | 0 NA | NA | NA | NA | NA |
| Olfr1186     | 0 NA | NA | NA | NA | NA |
| Olfr1187-ps1 | 0 NA | NA | NA | NA | NA |
| Olfr1188     | 0 NA | NA | NA | NA | NA |
| Olfr1189     | 0 NA | NA | NA | NA | NA |
| Olfr119      | 0 NA | NA | NA | NA | NA |
| Olfr1201     | 0 NA | NA | NA | NA | NA |
| Olfr1206     | 0 NA | NA | NA | NA | NA |
| Olfr1208     | 0 NA | NA | NA | NA | NA |
| Olfr121      | 0 NA | NA | NA | NA | NA |
| Olfr1212     | 0 NA | NA | NA | NA | NA |
| Olfr1214     | 0 NA | NA | NA | NA | NA |
| Olfr1222     | 0 NA | NA | NA | NA | NA |
| Olfr1223     | 0 NA | NA | NA | NA | NA |
| Olfr1224-ps1 | 0 NA | NA | NA | NA | NA |
| Olfr1225     | 0 NA | NA | NA | NA | NA |
| Olfr1227-ps1 | 0 NA | NA | NA | NA | NA |
| Olfr1228     | 0 NA | NA | NA | NA | NA |
| Olfr1229     | 0 NA | NA | NA | NA | NA |
| Olfr123      | 0 NA | NA | NA | NA | NA |
| Olfr1230     | 0 NA | NA | NA | NA | NA |
| Olfr1231     | 0 NA | NA | NA | NA | NA |
| Olfr1232     | 0 NA | NA | NA | NA | NA |
| Olfr1235-ps1 | 0 NA | NA | NA | NA | NA |
| Olfr1239     | 0 NA | NA | NA | NA | NA |
| Olfr1241     | 0 NA | NA | NA | NA | NA |
| Olfr1242     | 0 NA | NA | NA | NA | NA |
| Olfr1243     | 0 NA | NA | NA | NA | NA |
| Olfr1244-ps1 | 0 NA | NA | NA | NA | NA |
| Olfr1248     | 0 NA | NA | NA | NA | NA |
| Olfr1249     | 0 NA | NA | NA | NA | NA |
| Olfr1251     | 0 NA | NA | NA | NA | NA |
| Olfr1252     | 0 NA | NA | NA | NA | NA |
| Olfr1255     | 0 NA | NA | NA | NA | NA |
| Olfr126      | 0 NA | NA | NA | NA | NA |
| Olfr1266-ps1 | 0 NA | NA | NA | NA | NA |
| Olfr1267-ps1 | 0 NA | NA | NA | NA | NA |

|              |      |    |    |    |    |
|--------------|------|----|----|----|----|
| Olfr1270     | 0 NA | NA | NA | NA | NA |
| Olfr1272     | 0 NA | NA | NA | NA | NA |
| Olfr1275     | 0 NA | NA | NA | NA | NA |
| Olfr1281     | 0 NA | NA | NA | NA | NA |
| Olfr1282     | 0 NA | NA | NA | NA | NA |
| Olfr1283     | 0 NA | NA | NA | NA | NA |
| Olfr1287     | 0 NA | NA | NA | NA | NA |
| Olfr1288     | 0 NA | NA | NA | NA | NA |
| Olfr1289     | 0 NA | NA | NA | NA | NA |
| Olfr1292-ps1 | 0 NA | NA | NA | NA | NA |
| Olfr1294     | 0 NA | NA | NA | NA | NA |
| Olfr1296-ps1 | 0 NA | NA | NA | NA | NA |
| Olfr1298     | 0 NA | NA | NA | NA | NA |
| Olfr1299     | 0 NA | NA | NA | NA | NA |
| Olfr130      | 0 NA | NA | NA | NA | NA |
| Olfr1300-ps1 | 0 NA | NA | NA | NA | NA |
| Olfr1302     | 0 NA | NA | NA | NA | NA |
| Olfr1304-ps1 | 0 NA | NA | NA | NA | NA |
| Olfr1306     | 0 NA | NA | NA | NA | NA |
| Olfr1308     | 0 NA | NA | NA | NA | NA |
| Olfr1311     | 0 NA | NA | NA | NA | NA |
| Olfr1314     | 0 NA | NA | NA | NA | NA |
| Olfr1317     | 0 NA | NA | NA | NA | NA |
| Olfr1319-ps1 | 0 NA | NA | NA | NA | NA |
| Olfr1320     | 0 NA | NA | NA | NA | NA |
| Olfr1325     | 0 NA | NA | NA | NA | NA |
| Olfr1326-ps1 | 0 NA | NA | NA | NA | NA |
| Olfr1327-ps1 | 0 NA | NA | NA | NA | NA |
| Olfr1329     | 0 NA | NA | NA | NA | NA |
| Olfr1331     | 0 NA | NA | NA | NA | NA |
| Olfr1332-ps1 | 0 NA | NA | NA | NA | NA |
| Olfr1333     | 0 NA | NA | NA | NA | NA |
| Olfr1335     | 0 NA | NA | NA | NA | NA |
| Olfr1337     | 0 NA | NA | NA | NA | NA |
| Olfr1339     | 0 NA | NA | NA | NA | NA |
| Olfr134      | 0 NA | NA | NA | NA | NA |
| Olfr1343-ps1 | 0 NA | NA | NA | NA | NA |
| Olfr1345-ps1 | 0 NA | NA | NA | NA | NA |
| Olfr1347     | 0 NA | NA | NA | NA | NA |
| Olfr135      | 0 NA | NA | NA | NA | NA |
| Olfr1350     | 0 NA | NA | NA | NA | NA |
| Olfr1353     | 0 NA | NA | NA | NA | NA |
| Olfr1354     | 0 NA | NA | NA | NA | NA |
| Olfr1355     | 0 NA | NA | NA | NA | NA |
| Olfr136      | 0 NA | NA | NA | NA | NA |
| Olfr1360     | 0 NA | NA | NA | NA | NA |
| Olfr1361     | 0 NA | NA | NA | NA | NA |
| Olfr1362     | 0 NA | NA | NA | NA | NA |
| Olfr1364     | 0 NA | NA | NA | NA | NA |
| Olfr1366     | 0 NA | NA | NA | NA | NA |
| Olfr1367     | 0 NA | NA | NA | NA | NA |
| Olfr1368     | 0 NA | NA | NA | NA | NA |
| Olfr1370     | 0 NA | NA | NA | NA | NA |
| Olfr1371     | 0 NA | NA | NA | NA | NA |
| Olfr1373     | 0 NA | NA | NA | NA | NA |
| Olfr1374-ps1 | 0 NA | NA | NA | NA | NA |
| Olfr1375     | 0 NA | NA | NA | NA | NA |
| Olfr1376-ps1 | 0 NA | NA | NA | NA | NA |
| Olfr1377     | 0 NA | NA | NA | NA | NA |
| Olfr1379-ps1 | 0 NA | NA | NA | NA | NA |
| Olfr138      | 0 NA | NA | NA | NA | NA |
| Olfr1382     | 0 NA | NA | NA | NA | NA |
| Olfr1386     | 0 NA | NA | NA | NA | NA |
| Olfr139      | 0 NA | NA | NA | NA | NA |
| Olfr1390     | 0 NA | NA | NA | NA | NA |
| Olfr1394     | 0 NA | NA | NA | NA | NA |

|              |      |    |    |    |    |
|--------------|------|----|----|----|----|
| Olfr1395     | 0 NA | NA | NA | NA | NA |
| Olfr1397-ps1 | 0 NA | NA | NA | NA | NA |
| Olfr1398-ps1 | 0 NA | NA | NA | NA | NA |
| Olfr1401-ps1 | 0 NA | NA | NA | NA | NA |
| Olfr1407-ps1 | 0 NA | NA | NA | NA | NA |
| Olfr1408     | 0 NA | NA | NA | NA | NA |
| Olfr1409-ps1 | 0 NA | NA | NA | NA | NA |
| Olfr141      | 0 NA | NA | NA | NA | NA |
| Olfr1411     | 0 NA | NA | NA | NA | NA |
| Olfr1412     | 0 NA | NA | NA | NA | NA |
| Olfr1413     | 0 NA | NA | NA | NA | NA |
| Olfr1417     | 0 NA | NA | NA | NA | NA |
| Olfr142      | 0 NA | NA | NA | NA | NA |
| Olfr1421-ps1 | 0 NA | NA | NA | NA | NA |
| Olfr1422-ps1 | 0 NA | NA | NA | NA | NA |
| Olfr1424     | 0 NA | NA | NA | NA | NA |
| Olfr1430-ps1 | 0 NA | NA | NA | NA | NA |
| Olfr1435-ps1 | 0 NA | NA | NA | NA | NA |
| Olfr1436     | 0 NA | NA | NA | NA | NA |
| Olfr1439-ps1 | 0 NA | NA | NA | NA | NA |
| Olfr1445     | 0 NA | NA | NA | NA | NA |
| Olfr1446     | 0 NA | NA | NA | NA | NA |
| Olfr1447     | 0 NA | NA | NA | NA | NA |
| Olfr1449     | 0 NA | NA | NA | NA | NA |
| Olfr1450     | 0 NA | NA | NA | NA | NA |
| Olfr1452-ps1 | 0 NA | NA | NA | NA | NA |
| Olfr1453     | 0 NA | NA | NA | NA | NA |
| Olfr1455-ps1 | 0 NA | NA | NA | NA | NA |
| Olfr1456-ps1 | 0 NA | NA | NA | NA | NA |
| Olfr1458     | 0 NA | NA | NA | NA | NA |
| Olfr146      | 0 NA | NA | NA | NA | NA |
| Olfr1460-ps1 | 0 NA | NA | NA | NA | NA |
| Olfr1461     | 0 NA | NA | NA | NA | NA |
| Olfr1462     | 0 NA | NA | NA | NA | NA |
| Olfr1464-ps1 | 0 NA | NA | NA | NA | NA |
| Olfr1465     | 0 NA | NA | NA | NA | NA |
| Olfr1466     | 0 NA | NA | NA | NA | NA |
| Olfr1468-ps1 | 0 NA | NA | NA | NA | NA |
| Olfr1470-ps1 | 0 NA | NA | NA | NA | NA |
| Olfr1472     | 0 NA | NA | NA | NA | NA |
| Olfr1473-ps1 | 0 NA | NA | NA | NA | NA |
| Olfr1474     | 0 NA | NA | NA | NA | NA |
| Olfr1475     | 0 NA | NA | NA | NA | NA |
| Olfr1476-ps1 | 0 NA | NA | NA | NA | NA |
| Olfr1478-ps1 | 0 NA | NA | NA | NA | NA |
| Olfr1479-ps1 | 0 NA | NA | NA | NA | NA |
| Olfr148      | 0 NA | NA | NA | NA | NA |
| Olfr1480     | 0 NA | NA | NA | NA | NA |
| Olfr1481-ps1 | 0 NA | NA | NA | NA | NA |
| Olfr1482-ps1 | 0 NA | NA | NA | NA | NA |
| Olfr1483-ps1 | 0 NA | NA | NA | NA | NA |
| Olfr1485-ps1 | 0 NA | NA | NA | NA | NA |
| Olfr1486-ps1 | 0 NA | NA | NA | NA | NA |
| Olfr1488-ps1 | 0 NA | NA | NA | NA | NA |
| Olfr1491     | 0 NA | NA | NA | NA | NA |
| Olfr1492-ps1 | 0 NA | NA | NA | NA | NA |
| Olfr1493-ps1 | 0 NA | NA | NA | NA | NA |
| Olfr1494     | 0 NA | NA | NA | NA | NA |
| Olfr1496     | 0 NA | NA | NA | NA | NA |
| Olfr1497     | 0 NA | NA | NA | NA | NA |
| Olfr1498-ps1 | 0 NA | NA | NA | NA | NA |
| Olfr1499     | 0 NA | NA | NA | NA | NA |
| Olfr150      | 0 NA | NA | NA | NA | NA |
| Olfr1502     | 0 NA | NA | NA | NA | NA |
| Olfr1503-ps1 | 0 NA | NA | NA | NA | NA |
| Olfr1504     | 0 NA | NA | NA | NA | NA |

|              |      |    |    |    |    |
|--------------|------|----|----|----|----|
| Olfr1506     | 0 NA | NA | NA | NA | NA |
| Olfr1509     | 0 NA | NA | NA | NA | NA |
| Olfr151      | 0 NA | NA | NA | NA | NA |
| Olfr1510     | 0 NA | NA | NA | NA | NA |
| Olfr1511     | 0 NA | NA | NA | NA | NA |
| Olfr1512     | 0 NA | NA | NA | NA | NA |
| Olfr1513     | 0 NA | NA | NA | NA | NA |
| Olfr1532-ps1 | 0 NA | NA | NA | NA | NA |
| Olfr154      | 0 NA | NA | NA | NA | NA |
| Olfr1542-ps1 | 0 NA | NA | NA | NA | NA |
| Olfr1556-ps1 | 0 NA | NA | NA | NA | NA |
| Olfr156      | 0 NA | NA | NA | NA | NA |
| Olfr159      | 0 NA | NA | NA | NA | NA |
| Olfr162-ps1  | 0 NA | NA | NA | NA | NA |
| Olfr163-ps1  | 0 NA | NA | NA | NA | NA |
| Olfr164      | 0 NA | NA | NA | NA | NA |
| Olfr166      | 0 NA | NA | NA | NA | NA |
| Olfr168      | 0 NA | NA | NA | NA | NA |
| Olfr169      | 0 NA | NA | NA | NA | NA |
| Olfr170      | 0 NA | NA | NA | NA | NA |
| Olfr171      | 0 NA | NA | NA | NA | NA |
| Olfr172      | 0 NA | NA | NA | NA | NA |
| Olfr175      | 0 NA | NA | NA | NA | NA |
| Olfr180      | 0 NA | NA | NA | NA | NA |
| Olfr181      | 0 NA | NA | NA | NA | NA |
| Olfr184-ps1  | 0 NA | NA | NA | NA | NA |
| Olfr185-ps1  | 0 NA | NA | NA | NA | NA |
| Olfr187      | 0 NA | NA | NA | NA | NA |
| Olfr19       | 0 NA | NA | NA | NA | NA |
| Olfr191      | 0 NA | NA | NA | NA | NA |
| Olfr192      | 0 NA | NA | NA | NA | NA |
| Olfr193      | 0 NA | NA | NA | NA | NA |
| Olfr194      | 0 NA | NA | NA | NA | NA |
| Olfr196      | 0 NA | NA | NA | NA | NA |
| Olfr197      | 0 NA | NA | NA | NA | NA |
| Olfr198      | 0 NA | NA | NA | NA | NA |
| Olfr199      | 0 NA | NA | NA | NA | NA |
| Olfr200-ps1  | 0 NA | NA | NA | NA | NA |
| Olfr202      | 0 NA | NA | NA | NA | NA |
| Olfr203      | 0 NA | NA | NA | NA | NA |
| Olfr205      | 0 NA | NA | NA | NA | NA |
| Olfr206      | 0 NA | NA | NA | NA | NA |
| Olfr209      | 0 NA | NA | NA | NA | NA |
| Olfr210-ps1  | 0 NA | NA | NA | NA | NA |
| Olfr211      | 0 NA | NA | NA | NA | NA |
| Olfr214      | 0 NA | NA | NA | NA | NA |
| Olfr215      | 0 NA | NA | NA | NA | NA |
| Olfr218      | 0 NA | NA | NA | NA | NA |
| Olfr22-ps1   | 0 NA | NA | NA | NA | NA |
| Olfr220      | 0 NA | NA | NA | NA | NA |
| Olfr222      | 0 NA | NA | NA | NA | NA |
| Olfr223      | 0 NA | NA | NA | NA | NA |
| Olfr225      | 0 NA | NA | NA | NA | NA |
| Olfr231      | 0 NA | NA | NA | NA | NA |
| Olfr241-ps1  | 0 NA | NA | NA | NA | NA |
| Olfr247      | 0 NA | NA | NA | NA | NA |
| Olfr248      | 0 NA | NA | NA | NA | NA |
| Olfr25       | 0 NA | NA | NA | NA | NA |
| Olfr258-ps1  | 0 NA | NA | NA | NA | NA |
| Olfr26       | 0 NA | NA | NA | NA | NA |
| Olfr260-ps1  | 0 NA | NA | NA | NA | NA |
| Olfr262      | 0 NA | NA | NA | NA | NA |
| Olfr263      | 0 NA | NA | NA | NA | NA |
| Olfr266      | 0 NA | NA | NA | NA | NA |
| Olfr268-ps1  | 0 NA | NA | NA | NA | NA |
| Olfr269-ps1  | 0 NA | NA | NA | NA | NA |



|             |      |    |    |    |    |
|-------------|------|----|----|----|----|
| Olfr27      | 0 NA | NA | NA | NA | NA |
| Olfr271-ps1 | 0 NA | NA | NA | NA | NA |
| Olfr272     | 0 NA | NA | NA | NA | NA |
| Olfr274-ps1 | 0 NA | NA | NA | NA | NA |
| Olfr275     | 0 NA | NA | NA | NA | NA |
| Olfr277-ps1 | 0 NA | NA | NA | NA | NA |
| Olfr278-ps1 | 0 NA | NA | NA | NA | NA |
| Olfr282     | 0 NA | NA | NA | NA | NA |
| Olfr284     | 0 NA | NA | NA | NA | NA |
| Olfr289-ps1 | 0 NA | NA | NA | NA | NA |
| Olfr29-ps1  | 0 NA | NA | NA | NA | NA |
| Olfr292     | 0 NA | NA | NA | NA | NA |
| Olfr294     | 0 NA | NA | NA | NA | NA |
| Olfr296-ps1 | 0 NA | NA | NA | NA | NA |
| Olfr297     | 0 NA | NA | NA | NA | NA |
| Olfr298     | 0 NA | NA | NA | NA | NA |
| Olfr299     | 0 NA | NA | NA | NA | NA |
| Olfr3       | 0 NA | NA | NA | NA | NA |
| Olfr301     | 0 NA | NA | NA | NA | NA |
| Olfr304     | 0 NA | NA | NA | NA | NA |
| Olfr305     | 0 NA | NA | NA | NA | NA |
| Olfr306-ps1 | 0 NA | NA | NA | NA | NA |
| Olfr309     | 0 NA | NA | NA | NA | NA |
| Olfr310     | 0 NA | NA | NA | NA | NA |
| Olfr311     | 0 NA | NA | NA | NA | NA |
| Olfr312     | 0 NA | NA | NA | NA | NA |
| Olfr315     | 0 NA | NA | NA | NA | NA |
| Olfr317     | 0 NA | NA | NA | NA | NA |
| Olfr319     | 0 NA | NA | NA | NA | NA |
| Olfr32      | 0 NA | NA | NA | NA | NA |
| Olfr325     | 0 NA | NA | NA | NA | NA |
| Olfr326-ps1 | 0 NA | NA | NA | NA | NA |
| Olfr330     | 0 NA | NA | NA | NA | NA |
| Olfr331     | 0 NA | NA | NA | NA | NA |
| Olfr332     | 0 NA | NA | NA | NA | NA |
| Olfr334-ps1 | 0 NA | NA | NA | NA | NA |
| Olfr335-ps  | 0 NA | NA | NA | NA | NA |
| Olfr336-ps1 | 0 NA | NA | NA | NA | NA |
| Olfr337-ps1 | 0 NA | NA | NA | NA | NA |
| Olfr339     | 0 NA | NA | NA | NA | NA |
| Olfr340     | 0 NA | NA | NA | NA | NA |
| Olfr342     | 0 NA | NA | NA | NA | NA |
| Olfr343-ps1 | 0 NA | NA | NA | NA | NA |
| Olfr345     | 0 NA | NA | NA | NA | NA |
| Olfr347     | 0 NA | NA | NA | NA | NA |
| Olfr349-ps1 | 0 NA | NA | NA | NA | NA |
| Olfr350     | 0 NA | NA | NA | NA | NA |
| Olfr353     | 0 NA | NA | NA | NA | NA |
| Olfr356     | 0 NA | NA | NA | NA | NA |
| Olfr357     | 0 NA | NA | NA | NA | NA |
| Olfr359-ps1 | 0 NA | NA | NA | NA | NA |
| Olfr360     | 0 NA | NA | NA | NA | NA |
| Olfr363-ps  | 0 NA | NA | NA | NA | NA |
| Olfr367-ps  | 0 NA | NA | NA | NA | NA |
| Olfr368     | 0 NA | NA | NA | NA | NA |
| Olfr369-ps1 | 0 NA | NA | NA | NA | NA |
| Olfr375-ps1 | 0 NA | NA | NA | NA | NA |
| Olfr376     | 0 NA | NA | NA | NA | NA |
| Olfr377-ps1 | 0 NA | NA | NA | NA | NA |
| Olfr378     | 0 NA | NA | NA | NA | NA |
| Olfr379-ps1 | 0 NA | NA | NA | NA | NA |
| Olfr38      | 0 NA | NA | NA | NA | NA |
| Olfr382     | 0 NA | NA | NA | NA | NA |
| Olfr383-ps1 | 0 NA | NA | NA | NA | NA |
| Olfr385     | 0 NA | NA | NA | NA | NA |
| Olfr388-ps1 | 0 NA | NA | NA | NA | NA |

|             |      |    |    |    |    |
|-------------|------|----|----|----|----|
| Olfr389     | 0 NA | NA | NA | NA | NA |
| Olfr391     | 0 NA | NA | NA | NA | NA |
| Olfr396-ps1 | 0 NA | NA | NA | NA | NA |
| Olfr399     | 0 NA | NA | NA | NA | NA |
| Olfr400-ps1 | 0 NA | NA | NA | NA | NA |
| Olfr404-ps1 | 0 NA | NA | NA | NA | NA |
| Olfr405-ps1 | 0 NA | NA | NA | NA | NA |
| Olfr406     | 0 NA | NA | NA | NA | NA |
| Olfr407-ps1 | 0 NA | NA | NA | NA | NA |
| Olfr408-ps1 | 0 NA | NA | NA | NA | NA |
| Olfr409-ps1 | 0 NA | NA | NA | NA | NA |
| Olfr411     | 0 NA | NA | NA | NA | NA |
| Olfr412     | 0 NA | NA | NA | NA | NA |
| Olfr416-ps1 | 0 NA | NA | NA | NA | NA |
| Olfr419     | 0 NA | NA | NA | NA | NA |
| Olfr421-ps1 | 0 NA | NA | NA | NA | NA |
| Olfr424     | 0 NA | NA | NA | NA | NA |
| Olfr428-ps1 | 0 NA | NA | NA | NA | NA |
| Olfr429     | 0 NA | NA | NA | NA | NA |
| Olfr43      | 0 NA | NA | NA | NA | NA |
| Olfr431-ps1 | 0 NA | NA | NA | NA | NA |
| Olfr434     | 0 NA | NA | NA | NA | NA |
| Olfr435     | 0 NA | NA | NA | NA | NA |
| Olfr436-ps1 | 0 NA | NA | NA | NA | NA |
| Olfr437     | 0 NA | NA | NA | NA | NA |
| Olfr439-ps1 | 0 NA | NA | NA | NA | NA |
| Olfr440-ps1 | 0 NA | NA | NA | NA | NA |
| Olfr442-ps1 | 0 NA | NA | NA | NA | NA |
| Olfr443-ps1 | 0 NA | NA | NA | NA | NA |
| Olfr444     | 0 NA | NA | NA | NA | NA |
| Olfr449     | 0 NA | NA | NA | NA | NA |
| Olfr450     | 0 NA | NA | NA | NA | NA |
| Olfr451-ps1 | 0 NA | NA | NA | NA | NA |
| Olfr452     | 0 NA | NA | NA | NA | NA |
| Olfr453     | 0 NA | NA | NA | NA | NA |
| Olfr454-ps1 | 0 NA | NA | NA | NA | NA |
| Olfr455     | 0 NA | NA | NA | NA | NA |
| Olfr456     | 0 NA | NA | NA | NA | NA |
| Olfr458     | 0 NA | NA | NA | NA | NA |
| Olfr467     | 0 NA | NA | NA | NA | NA |
| Olfr468-ps1 | 0 NA | NA | NA | NA | NA |
| Olfr469     | 0 NA | NA | NA | NA | NA |
| Olfr47      | 0 NA | NA | NA | NA | NA |
| Olfr470     | 0 NA | NA | NA | NA | NA |
| Olfr471     | 0 NA | NA | NA | NA | NA |
| Olfr473     | 0 NA | NA | NA | NA | NA |
| Olfr474     | 0 NA | NA | NA | NA | NA |
| Olfr475-ps1 | 0 NA | NA | NA | NA | NA |
| Olfr476     | 0 NA | NA | NA | NA | NA |
| Olfr480     | 0 NA | NA | NA | NA | NA |
| Olfr482     | 0 NA | NA | NA | NA | NA |
| Olfr483     | 0 NA | NA | NA | NA | NA |
| Olfr485     | 0 NA | NA | NA | NA | NA |
| Olfr486     | 0 NA | NA | NA | NA | NA |
| Olfr489-ps1 | 0 NA | NA | NA | NA | NA |
| Olfr490     | 0 NA | NA | NA | NA | NA |
| Olfr491     | 0 NA | NA | NA | NA | NA |
| Olfr492     | 0 NA | NA | NA | NA | NA |
| Olfr493     | 0 NA | NA | NA | NA | NA |
| Olfr494     | 0 NA | NA | NA | NA | NA |
| Olfr495     | 0 NA | NA | NA | NA | NA |
| Olfr496-ps1 | 0 NA | NA | NA | NA | NA |
| Olfr497     | 0 NA | NA | NA | NA | NA |
| Olfr498     | 0 NA | NA | NA | NA | NA |
| Olfr499-ps1 | 0 NA | NA | NA | NA | NA |
| Olfr50      | 0 NA | NA | NA | NA | NA |

|             |      |    |    |    |    |
|-------------|------|----|----|----|----|
| Olfr500-ps1 | 0 NA | NA | NA | NA | NA |
| Olfr501-ps1 | 0 NA | NA | NA | NA | NA |
| Olfr502     | 0 NA | NA | NA | NA | NA |
| Olfr503     | 0 NA | NA | NA | NA | NA |
| Olfr504     | 0 NA | NA | NA | NA | NA |
| Olfr505-ps1 | 0 NA | NA | NA | NA | NA |
| Olfr507     | 0 NA | NA | NA | NA | NA |
| Olfr508     | 0 NA | NA | NA | NA | NA |
| Olfr511-ps1 | 0 NA | NA | NA | NA | NA |
| Olfr512     | 0 NA | NA | NA | NA | NA |
| Olfr513     | 0 NA | NA | NA | NA | NA |
| Olfr514     | 0 NA | NA | NA | NA | NA |
| Olfr515-ps1 | 0 NA | NA | NA | NA | NA |
| Olfr516     | 0 NA | NA | NA | NA | NA |
| Olfr519     | 0 NA | NA | NA | NA | NA |
| Olfr520     | 0 NA | NA | NA | NA | NA |
| Olfr521     | 0 NA | NA | NA | NA | NA |
| Olfr522     | 0 NA | NA | NA | NA | NA |
| Olfr524     | 0 NA | NA | NA | NA | NA |
| Olfr528-ps1 | 0 NA | NA | NA | NA | NA |
| Olfr529-ps1 | 0 NA | NA | NA | NA | NA |
| Olfr53      | 0 NA | NA | NA | NA | NA |
| Olfr530     | 0 NA | NA | NA | NA | NA |
| Olfr534-ps1 | 0 NA | NA | NA | NA | NA |
| Olfr538     | 0 NA | NA | NA | NA | NA |
| Olfr540-ps1 | 0 NA | NA | NA | NA | NA |
| Olfr541     | 0 NA | NA | NA | NA | NA |
| Olfr543     | 0 NA | NA | NA | NA | NA |
| Olfr546-ps1 | 0 NA | NA | NA | NA | NA |
| Olfr547     | 0 NA | NA | NA | NA | NA |
| Olfr549     | 0 NA | NA | NA | NA | NA |
| Olfr551     | 0 NA | NA | NA | NA | NA |
| Olfr553     | 0 NA | NA | NA | NA | NA |
| Olfr555     | 0 NA | NA | NA | NA | NA |
| Olfr557     | 0 NA | NA | NA | NA | NA |
| Olfr559     | 0 NA | NA | NA | NA | NA |
| Olfr560     | 0 NA | NA | NA | NA | NA |
| Olfr561     | 0 NA | NA | NA | NA | NA |
| Olfr562-ps1 | 0 NA | NA | NA | NA | NA |
| Olfr563-ps1 | 0 NA | NA | NA | NA | NA |
| Olfr564     | 0 NA | NA | NA | NA | NA |
| Olfr565-ps1 | 0 NA | NA | NA | NA | NA |
| Olfr567-ps1 | 0 NA | NA | NA | NA | NA |
| Olfr568     | 0 NA | NA | NA | NA | NA |
| Olfr570     | 0 NA | NA | NA | NA | NA |
| Olfr572     | 0 NA | NA | NA | NA | NA |
| Olfr573-ps1 | 0 NA | NA | NA | NA | NA |
| Olfr574     | 0 NA | NA | NA | NA | NA |
| Olfr577     | 0 NA | NA | NA | NA | NA |
| Olfr58      | 0 NA | NA | NA | NA | NA |
| Olfr580-ps1 | 0 NA | NA | NA | NA | NA |
| Olfr581-ps1 | 0 NA | NA | NA | NA | NA |
| Olfr582     | 0 NA | NA | NA | NA | NA |
| Olfr583     | 0 NA | NA | NA | NA | NA |
| Olfr584     | 0 NA | NA | NA | NA | NA |
| Olfr585     | 0 NA | NA | NA | NA | NA |
| Olfr587-ps1 | 0 NA | NA | NA | NA | NA |
| Olfr589     | 0 NA | NA | NA | NA | NA |
| Olfr59      | 0 NA | NA | NA | NA | NA |
| Olfr590-ps1 | 0 NA | NA | NA | NA | NA |
| Olfr593     | 0 NA | NA | NA | NA | NA |
| Olfr594     | 0 NA | NA | NA | NA | NA |
| Olfr595-ps1 | 0 NA | NA | NA | NA | NA |
| Olfr598     | 0 NA | NA | NA | NA | NA |
| Olfr599     | 0 NA | NA | NA | NA | NA |
| Olfr601     | 0 NA | NA | NA | NA | NA |

|             |      |    |    |    |    |
|-------------|------|----|----|----|----|
| Olfr603     | 0 NA | NA | NA | NA | NA |
| Olfr606     | 0 NA | NA | NA | NA | NA |
| Olfr608     | 0 NA | NA | NA | NA | NA |
| Olfr609     | 0 NA | NA | NA | NA | NA |
| Olfr61      | 0 NA | NA | NA | NA | NA |
| Olfr610     | 0 NA | NA | NA | NA | NA |
| Olfr611     | 0 NA | NA | NA | NA | NA |
| Olfr615     | 0 NA | NA | NA | NA | NA |
| Olfr616     | 0 NA | NA | NA | NA | NA |
| Olfr617     | 0 NA | NA | NA | NA | NA |
| Olfr618     | 0 NA | NA | NA | NA | NA |
| Olfr619     | 0 NA | NA | NA | NA | NA |
| Olfr621-ps1 | 0 NA | NA | NA | NA | NA |
| Olfr625-ps1 | 0 NA | NA | NA | NA | NA |
| Olfr626-ps1 | 0 NA | NA | NA | NA | NA |
| Olfr630     | 0 NA | NA | NA | NA | NA |
| Olfr631     | 0 NA | NA | NA | NA | NA |
| Olfr632     | 0 NA | NA | NA | NA | NA |
| Olfr634-ps1 | 0 NA | NA | NA | NA | NA |
| Olfr636-ps1 | 0 NA | NA | NA | NA | NA |
| Olfr637-ps1 | 0 NA | NA | NA | NA | NA |
| Olfr638     | 0 NA | NA | NA | NA | NA |
| Olfr643     | 0 NA | NA | NA | NA | NA |
| Olfr644     | 0 NA | NA | NA | NA | NA |
| Olfr647-ps1 | 0 NA | NA | NA | NA | NA |
| Olfr649     | 0 NA | NA | NA | NA | NA |
| Olfr65      | 0 NA | NA | NA | NA | NA |
| Olfr651     | 0 NA | NA | NA | NA | NA |
| Olfr657     | 0 NA | NA | NA | NA | NA |
| Olfr659     | 0 NA | NA | NA | NA | NA |
| Olfr660-ps1 | 0 NA | NA | NA | NA | NA |
| Olfr662-ps1 | 0 NA | NA | NA | NA | NA |
| Olfr663     | 0 NA | NA | NA | NA | NA |
| Olfr664     | 0 NA | NA | NA | NA | NA |
| Olfr665     | 0 NA | NA | NA | NA | NA |
| Olfr666     | 0 NA | NA | NA | NA | NA |
| Olfr669     | 0 NA | NA | NA | NA | NA |
| Olfr672     | 0 NA | NA | NA | NA | NA |
| Olfr673-ps1 | 0 NA | NA | NA | NA | NA |
| Olfr674-ps1 | 0 NA | NA | NA | NA | NA |
| Olfr677     | 0 NA | NA | NA | NA | NA |
| Olfr68      | 0 NA | NA | NA | NA | NA |
| Olfr680-ps1 | 0 NA | NA | NA | NA | NA |
| Olfr682-ps1 | 0 NA | NA | NA | NA | NA |
| Olfr684     | 0 NA | NA | NA | NA | NA |
| Olfr686     | 0 NA | NA | NA | NA | NA |
| Olfr687     | 0 NA | NA | NA | NA | NA |
| Olfr688     | 0 NA | NA | NA | NA | NA |
| Olfr69      | 0 NA | NA | NA | NA | NA |
| Olfr692     | 0 NA | NA | NA | NA | NA |
| Olfr693     | 0 NA | NA | NA | NA | NA |
| Olfr694     | 0 NA | NA | NA | NA | NA |
| Olfr696-ps1 | 0 NA | NA | NA | NA | NA |
| Olfr697     | 0 NA | NA | NA | NA | NA |
| Olfr698     | 0 NA | NA | NA | NA | NA |
| Olfr700     | 0 NA | NA | NA | NA | NA |
| Olfr701     | 0 NA | NA | NA | NA | NA |
| Olfr702     | 0 NA | NA | NA | NA | NA |
| Olfr703     | 0 NA | NA | NA | NA | NA |
| Olfr706     | 0 NA | NA | NA | NA | NA |
| Olfr707     | 0 NA | NA | NA | NA | NA |
| Olfr710     | 0 NA | NA | NA | NA | NA |
| Olfr711     | 0 NA | NA | NA | NA | NA |
| Olfr712-ps1 | 0 NA | NA | NA | NA | NA |
| Olfr719-ps  | 0 NA | NA | NA | NA | NA |
| Olfr722     | 0 NA | NA | NA | NA | NA |

|             |      |    |    |    |    |
|-------------|------|----|----|----|----|
| Olfr723     | 0 NA | NA | NA | NA | NA |
| Olfr724     | 0 NA | NA | NA | NA | NA |
| Olfr725     | 0 NA | NA | NA | NA | NA |
| Olfr726     | 0 NA | NA | NA | NA | NA |
| Olfr736     | 0 NA | NA | NA | NA | NA |
| Olfr737-ps1 | 0 NA | NA | NA | NA | NA |
| Olfr738     | 0 NA | NA | NA | NA | NA |
| Olfr74      | 0 NA | NA | NA | NA | NA |
| Olfr743     | 0 NA | NA | NA | NA | NA |
| Olfr746     | 0 NA | NA | NA | NA | NA |
| Olfr747     | 0 NA | NA | NA | NA | NA |
| Olfr749     | 0 NA | NA | NA | NA | NA |
| Olfr752-ps1 | 0 NA | NA | NA | NA | NA |
| Olfr754-ps1 | 0 NA | NA | NA | NA | NA |
| Olfr756-ps1 | 0 NA | NA | NA | NA | NA |
| Olfr757-ps1 | 0 NA | NA | NA | NA | NA |
| Olfr758-ps1 | 0 NA | NA | NA | NA | NA |
| Olfr759-ps1 | 0 NA | NA | NA | NA | NA |
| Olfr760-ps1 | 0 NA | NA | NA | NA | NA |
| Olfr761     | 0 NA | NA | NA | NA | NA |
| Olfr762-ps1 | 0 NA | NA | NA | NA | NA |
| Olfr766-ps1 | 0 NA | NA | NA | NA | NA |
| Olfr770     | 0 NA | NA | NA | NA | NA |
| Olfr771     | 0 NA | NA | NA | NA | NA |
| Olfr772     | 0 NA | NA | NA | NA | NA |
| Olfr773     | 0 NA | NA | NA | NA | NA |
| Olfr776     | 0 NA | NA | NA | NA | NA |
| Olfr778-ps1 | 0 NA | NA | NA | NA | NA |
| Olfr779     | 0 NA | NA | NA | NA | NA |
| Olfr781     | 0 NA | NA | NA | NA | NA |
| Olfr783-ps1 | 0 NA | NA | NA | NA | NA |
| Olfr785     | 0 NA | NA | NA | NA | NA |
| Olfr790     | 0 NA | NA | NA | NA | NA |
| Olfr791     | 0 NA | NA | NA | NA | NA |
| Olfr792     | 0 NA | NA | NA | NA | NA |
| Olfr793-ps1 | 0 NA | NA | NA | NA | NA |
| Olfr795-ps1 | 0 NA | NA | NA | NA | NA |
| Olfr797-ps1 | 0 NA | NA | NA | NA | NA |
| Olfr799     | 0 NA | NA | NA | NA | NA |
| Olfr8       | 0 NA | NA | NA | NA | NA |
| Olfr800     | 0 NA | NA | NA | NA | NA |
| Olfr805     | 0 NA | NA | NA | NA | NA |
| Olfr807     | 0 NA | NA | NA | NA | NA |
| Olfr811     | 0 NA | NA | NA | NA | NA |
| Olfr812     | 0 NA | NA | NA | NA | NA |
| Olfr813     | 0 NA | NA | NA | NA | NA |
| Olfr815     | 0 NA | NA | NA | NA | NA |
| Olfr818     | 0 NA | NA | NA | NA | NA |
| Olfr819     | 0 NA | NA | NA | NA | NA |
| Olfr820     | 0 NA | NA | NA | NA | NA |
| Olfr821     | 0 NA | NA | NA | NA | NA |
| Olfr823     | 0 NA | NA | NA | NA | NA |
| Olfr826     | 0 NA | NA | NA | NA | NA |
| Olfr828     | 0 NA | NA | NA | NA | NA |
| Olfr831-ps1 | 0 NA | NA | NA | NA | NA |
| Olfr833-ps1 | 0 NA | NA | NA | NA | NA |
| Olfr834     | 0 NA | NA | NA | NA | NA |
| Olfr835     | 0 NA | NA | NA | NA | NA |
| Olfr836     | 0 NA | NA | NA | NA | NA |
| Olfr838-ps1 | 0 NA | NA | NA | NA | NA |
| Olfr840-ps1 | 0 NA | NA | NA | NA | NA |
| Olfr844     | 0 NA | NA | NA | NA | NA |
| Olfr848-ps1 | 0 NA | NA | NA | NA | NA |
| Olfr849     | 0 NA | NA | NA | NA | NA |
| Olfr850     | 0 NA | NA | NA | NA | NA |
| Olfr852-ps1 | 0 NA | NA | NA | NA | NA |

|             |      |    |    |    |    |
|-------------|------|----|----|----|----|
| Olfr854     | 0 NA | NA | NA | NA | NA |
| Olfr855     | 0 NA | NA | NA | NA | NA |
| Olfr856-ps1 | 0 NA | NA | NA | NA | NA |
| Olfr858-ps1 | 0 NA | NA | NA | NA | NA |
| Olfr860     | 0 NA | NA | NA | NA | NA |
| Olfr861-ps1 | 0 NA | NA | NA | NA | NA |
| Olfr863-ps1 | 0 NA | NA | NA | NA | NA |
| Olfr864-ps1 | 0 NA | NA | NA | NA | NA |
| Olfr865-ps1 | 0 NA | NA | NA | NA | NA |
| Olfr866     | 0 NA | NA | NA | NA | NA |
| Olfr868     | 0 NA | NA | NA | NA | NA |
| Olfr869     | 0 NA | NA | NA | NA | NA |
| Olfr871     | 0 NA | NA | NA | NA | NA |
| Olfr872     | 0 NA | NA | NA | NA | NA |
| Olfr874     | 0 NA | NA | NA | NA | NA |
| Olfr875     | 0 NA | NA | NA | NA | NA |
| Olfr879-ps1 | 0 NA | NA | NA | NA | NA |
| Olfr880-ps1 | 0 NA | NA | NA | NA | NA |
| Olfr882-ps1 | 0 NA | NA | NA | NA | NA |
| Olfr883     | 0 NA | NA | NA | NA | NA |
| Olfr884     | 0 NA | NA | NA | NA | NA |
| Olfr885     | 0 NA | NA | NA | NA | NA |
| Olfr886-ps1 | 0 NA | NA | NA | NA | NA |
| Olfr888     | 0 NA | NA | NA | NA | NA |
| Olfr891     | 0 NA | NA | NA | NA | NA |
| Olfr892-ps1 | 0 NA | NA | NA | NA | NA |
| Olfr894     | 0 NA | NA | NA | NA | NA |
| Olfr895     | 0 NA | NA | NA | NA | NA |
| Olfr897-ps1 | 0 NA | NA | NA | NA | NA |
| Olfr902     | 0 NA | NA | NA | NA | NA |
| Olfr908     | 0 NA | NA | NA | NA | NA |
| Olfr91      | 0 NA | NA | NA | NA | NA |
| Olfr910     | 0 NA | NA | NA | NA | NA |
| Olfr911-ps1 | 0 NA | NA | NA | NA | NA |
| Olfr913     | 0 NA | NA | NA | NA | NA |
| Olfr917     | 0 NA | NA | NA | NA | NA |
| Olfr919     | 0 NA | NA | NA | NA | NA |
| Olfr92      | 0 NA | NA | NA | NA | NA |
| Olfr925-ps1 | 0 NA | NA | NA | NA | NA |
| Olfr926     | 0 NA | NA | NA | NA | NA |
| Olfr927-ps1 | 0 NA | NA | NA | NA | NA |
| Olfr928-ps1 | 0 NA | NA | NA | NA | NA |
| Olfr929-ps1 | 0 NA | NA | NA | NA | NA |
| Olfr930     | 0 NA | NA | NA | NA | NA |
| Olfr931-ps1 | 0 NA | NA | NA | NA | NA |
| Olfr934     | 0 NA | NA | NA | NA | NA |
| Olfr935     | 0 NA | NA | NA | NA | NA |
| Olfr936     | 0 NA | NA | NA | NA | NA |
| Olfr937     | 0 NA | NA | NA | NA | NA |
| Olfr938     | 0 NA | NA | NA | NA | NA |
| Olfr94      | 0 NA | NA | NA | NA | NA |
| Olfr941-ps1 | 0 NA | NA | NA | NA | NA |
| Olfr942-ps1 | 0 NA | NA | NA | NA | NA |
| Olfr944     | 0 NA | NA | NA | NA | NA |
| Olfr945     | 0 NA | NA | NA | NA | NA |
| Olfr946-ps1 | 0 NA | NA | NA | NA | NA |
| Olfr947-ps1 | 0 NA | NA | NA | NA | NA |
| Olfr948     | 0 NA | NA | NA | NA | NA |
| Olfr949-ps1 | 0 NA | NA | NA | NA | NA |
| Olfr950-ps1 | 0 NA | NA | NA | NA | NA |
| Olfr951     | 0 NA | NA | NA | NA | NA |
| Olfr952     | 0 NA | NA | NA | NA | NA |
| Olfr953-ps1 | 0 NA | NA | NA | NA | NA |
| Olfr955     | 0 NA | NA | NA | NA | NA |
| Olfr956-ps1 | 0 NA | NA | NA | NA | NA |
| Olfr957     | 0 NA | NA | NA | NA | NA |

|              |      |    |    |    |    |
|--------------|------|----|----|----|----|
| Olfr960      | 0 NA | NA | NA | NA | NA |
| Olfr962-ps1  | 0 NA | NA | NA | NA | NA |
| Olfr963      | 0 NA | NA | NA | NA | NA |
| Olfr964-ps1  | 0 NA | NA | NA | NA | NA |
| Olfr965      | 0 NA | NA | NA | NA | NA |
| Olfr966-ps1  | 0 NA | NA | NA | NA | NA |
| Olfr968      | 0 NA | NA | NA | NA | NA |
| Olfr969      | 0 NA | NA | NA | NA | NA |
| Olfr971      | 0 NA | NA | NA | NA | NA |
| Olfr972      | 0 NA | NA | NA | NA | NA |
| Olfr977-ps1  | 0 NA | NA | NA | NA | NA |
| Olfr978      | 0 NA | NA | NA | NA | NA |
| Olfr98       | 0 NA | NA | NA | NA | NA |
| Olfr985      | 0 NA | NA | NA | NA | NA |
| Olfr987      | 0 NA | NA | NA | NA | NA |
| Olfr988      | 0 NA | NA | NA | NA | NA |
| Olfr989-ps1  | 0 NA | NA | NA | NA | NA |
| Olfr99       | 0 NA | NA | NA | NA | NA |
| Olfr990-ps1  | 0 NA | NA | NA | NA | NA |
| Olfr991-ps1  | 0 NA | NA | NA | NA | NA |
| Olfr992      | 0 NA | NA | NA | NA | NA |
| Olfr993      | 0 NA | NA | NA | NA | NA |
| Olfr994      | 0 NA | NA | NA | NA | NA |
| Olfr995      | 0 NA | NA | NA | NA | NA |
| Olfr996      | 0 NA | NA | NA | NA | NA |
| Olfr997-ps1  | 0 NA | NA | NA | NA | NA |
| Olfr998      | 0 NA | NA | NA | NA | NA |
| Olfr999-ps1  | 0 NA | NA | NA | NA | NA |
| Olig2        | 0 NA | NA | NA | NA | NA |
| Olrf445-ps1  | 0 NA | NA | NA | NA | NA |
| Omt2a        | 0 NA | NA | NA | NA | NA |
| Omt2b        | 0 NA | NA | NA | NA | NA |
| Oog2         | 0 NA | NA | NA | NA | NA |
| Oog3         | 0 NA | NA | NA | NA | NA |
| Oog4         | 0 NA | NA | NA | NA | NA |
| Oosp2        | 0 NA | NA | NA | NA | NA |
| Oosp3        | 0 NA | NA | NA | NA | NA |
| Opn1mw       | 0 NA | NA | NA | NA | NA |
| Opn4         | 0 NA | NA | NA | NA | NA |
| Opn5         | 0 NA | NA | NA | NA | NA |
| Otogl        | 0 NA | NA | NA | NA | NA |
| Otor         | 0 NA | NA | NA | NA | NA |
| Ott          | 0 NA | NA | NA | NA | NA |
| Otud6a       | 0 NA | NA | NA | NA | NA |
| Ovch2        | 0 NA | NA | NA | NA | NA |
| Oxgr1        | 0 NA | NA | NA | NA | NA |
| Pabpc1l2a-ps | 0 NA | NA | NA | NA | NA |
| Pabpn1l      | 0 NA | NA | NA | NA | NA |
| Padi6        | 0 NA | NA | NA | NA | NA |
| Pafah1b1-ps1 | 0 NA | NA | NA | NA | NA |
| Pafah1b1-ps2 | 0 NA | NA | NA | NA | NA |
| Panx3        | 0 NA | NA | NA | NA | NA |
| Pate10       | 0 NA | NA | NA | NA | NA |
| Pate11       | 0 NA | NA | NA | NA | NA |
| Pate12       | 0 NA | NA | NA | NA | NA |
| Pate3        | 0 NA | NA | NA | NA | NA |
| Pate4        | 0 NA | NA | NA | NA | NA |
| Pate5        | 0 NA | NA | NA | NA | NA |
| Pate6        | 0 NA | NA | NA | NA | NA |
| Pate7        | 0 NA | NA | NA | NA | NA |
| Pate8        | 0 NA | NA | NA | NA | NA |
| Pax4         | 0 NA | NA | NA | NA | NA |
| Pax7         | 0 NA | NA | NA | NA | NA |
| Pax9         | 0 NA | NA | NA | NA | NA |
| Pbsn         | 0 NA | NA | NA | NA | NA |
| Pcare        | 0 NA | NA | NA | NA | NA |

|            |      |    |    |    |    |
|------------|------|----|----|----|----|
| Pcdha12    | 0 NA | NA | NA | NA | NA |
| Pcdha2     | 0 NA | NA | NA | NA | NA |
| Pcdha3     | 0 NA | NA | NA | NA | NA |
| Pcdha6     | 0 NA | NA | NA | NA | NA |
| Pcdha7     | 0 NA | NA | NA | NA | NA |
| Pcdhac1    | 0 NA | NA | NA | NA | NA |
| Pcdhac2    | 0 NA | NA | NA | NA | NA |
| Pcdhb1     | 0 NA | NA | NA | NA | NA |
| Pced1c-ps  | 0 NA | NA | NA | NA | NA |
| Pcna-ps1   | 0 NA | NA | NA | NA | NA |
| Pcsk1n     | 0 NA | NA | NA | NA | NA |
| Pdc        | 0 NA | NA | NA | NA | NA |
| Pdcl2      | 0 NA | NA | NA | NA | NA |
| Pdha2      | 0 NA | NA | NA | NA | NA |
| Pdia2      | 0 NA | NA | NA | NA | NA |
| Pdyn       | 0 NA | NA | NA | NA | NA |
| Pdzph1     | 0 NA | NA | NA | NA | NA |
| Pea15b     | 0 NA | NA | NA | NA | NA |
| Pebp4      | 0 NA | NA | NA | NA | NA |
| Pet117     | 0 NA | NA | NA | NA | NA |
| Pex13-ps   | 0 NA | NA | NA | NA | NA |
| Pfn3       | 0 NA | NA | NA | NA | NA |
| Pfn5       | 0 NA | NA | NA | NA | NA |
| Pfpl       | 0 NA | NA | NA | NA | NA |
| Pgam1-ps1  | 0 NA | NA | NA | NA | NA |
| Pgam1-ps2  | 0 NA | NA | NA | NA | NA |
| Pgk1-ps3   | 0 NA | NA | NA | NA | NA |
| Pglyrp3    | 0 NA | NA | NA | NA | NA |
| Pgr15l     | 0 NA | NA | NA | NA | NA |
| Phf20-ps   | 0 NA | NA | NA | NA | NA |
| Phox2b     | 0 NA | NA | NA | NA | NA |
| Pih1d3     | 0 NA | NA | NA | NA | NA |
| Pih1h3b    | 0 NA | NA | NA | NA | NA |
| Pip        | 0 NA | NA | NA | NA | NA |
| Pitx2      | 0 NA | NA | NA | NA | NA |
| Pla2g2a    | 0 NA | NA | NA | NA | NA |
| Pla2g2f    | 0 NA | NA | NA | NA | NA |
| Pla2g4c-ps | 0 NA | NA | NA | NA | NA |
| Pla2g4d    | 0 NA | NA | NA | NA | NA |
| Plcz1      | 0 NA | NA | NA | NA | NA |
| Plk-ps1    | 0 NA | NA | NA | NA | NA |
| Plpp4      | 0 NA | NA | NA | NA | NA |
| Pmch       | 0 NA | NA | NA | NA | NA |
| Pmis2      | 0 NA | NA | NA | NA | NA |
| Pmp2       | 0 NA | NA | NA | NA | NA |
| Pnlip      | 0 NA | NA | NA | NA | NA |
| Pnmal1     | 0 NA | NA | NA | NA | NA |
| Pom121l12  | 0 NA | NA | NA | NA | NA |
| Poteg      | 0 NA | NA | NA | NA | NA |
| Pou4f3     | 0 NA | NA | NA | NA | NA |
| Ppp1r14d   | 0 NA | NA | NA | NA | NA |
| Ppp1r2-ps1 | 0 NA | NA | NA | NA | NA |
| Ppp1r2-ps2 | 0 NA | NA | NA | NA | NA |
| Ppp1r2-ps3 | 0 NA | NA | NA | NA | NA |
| Ppp1r2-ps7 | 0 NA | NA | NA | NA | NA |
| Ppp1r2-ps9 | 0 NA | NA | NA | NA | NA |
| Ppp3r2     | 0 NA | NA | NA | NA | NA |
| Ppp4r3c-ps | 0 NA | NA | NA | NA | NA |
| Prame      | 0 NA | NA | NA | NA | NA |
| Pramef17   | 0 NA | NA | NA | NA | NA |
| Pramef20   | 0 NA | NA | NA | NA | NA |
| Pramef6    | 0 NA | NA | NA | NA | NA |
| Pramel     | 0 NA | NA | NA | NA | NA |
| Pramel1    | 0 NA | NA | NA | NA | NA |
| Pramel3    | 0 NA | NA | NA | NA | NA |
| Prb1       | 0 NA | NA | NA | NA | NA |



|            |      |    |    |    |    |
|------------|------|----|----|----|----|
| Prb3-ps    | 0 NA | NA | NA | NA | NA |
| Prdm12     | 0 NA | NA | NA | NA | NA |
| Prdm13     | 0 NA | NA | NA | NA | NA |
| Prdx2-ps2  | 0 NA | NA | NA | NA | NA |
| Prdx6-ps2  | 0 NA | NA | NA | NA | NA |
| Prdx6b     | 0 NA | NA | NA | NA | NA |
| Prh1       | 0 NA | NA | NA | NA | NA |
| Prkaca-ps1 | 0 NA | NA | NA | NA | NA |
| Prl        | 0 NA | NA | NA | NA | NA |
| Prl2a1     | 0 NA | NA | NA | NA | NA |
| Prl2b1     | 0 NA | NA | NA | NA | NA |
| Prl2c1     | 0 NA | NA | NA | NA | NA |
| Prl2c2     | 0 NA | NA | NA | NA | NA |
| Prl2c3     | 0 NA | NA | NA | NA | NA |
| Prl2c5     | 0 NA | NA | NA | NA | NA |
| Prl3a1     | 0 NA | NA | NA | NA | NA |
| Prl3b1     | 0 NA | NA | NA | NA | NA |
| Prl3c1     | 0 NA | NA | NA | NA | NA |
| Prl3d1     | 0 NA | NA | NA | NA | NA |
| Prl3d2     | 0 NA | NA | NA | NA | NA |
| Prl3d3     | 0 NA | NA | NA | NA | NA |
| Prl4a1     | 0 NA | NA | NA | NA | NA |
| Prl5a1     | 0 NA | NA | NA | NA | NA |
| Prl7b1     | 0 NA | NA | NA | NA | NA |
| Prl7c1     | 0 NA | NA | NA | NA | NA |
| Prl8a2     | 0 NA | NA | NA | NA | NA |
| Prl8a6     | 0 NA | NA | NA | NA | NA |
| Prl8a8     | 0 NA | NA | NA | NA | NA |
| Prl8a9     | 0 NA | NA | NA | NA | NA |
| Prlh       | 0 NA | NA | NA | NA | NA |
| Prlhr      | 0 NA | NA | NA | NA | NA |
| Prm2       | 0 NA | NA | NA | NA | NA |
| Prn        | 0 NA | NA | NA | NA | NA |
| Prok2      | 0 NA | NA | NA | NA | NA |
| Prol1      | 0 NA | NA | NA | NA | NA |
| Prp2       | 0 NA | NA | NA | NA | NA |
| Prph2      | 0 NA | NA | NA | NA | NA |
| Prpmp5     | 0 NA | NA | NA | NA | NA |
| Prr23a1    | 0 NA | NA | NA | NA | NA |
| Prr23a2    | 0 NA | NA | NA | NA | NA |
| Prr23a3    | 0 NA | NA | NA | NA | NA |
| Prr27      | 0 NA | NA | NA | NA | NA |
| Prr30      | 0 NA | NA | NA | NA | NA |
| Prr32      | 0 NA | NA | NA | NA | NA |
| Prr9       | 0 NA | NA | NA | NA | NA |
| Prss1      | 0 NA | NA | NA | NA | NA |
| Prss2      | 0 NA | NA | NA | NA | NA |
| Prss21     | 0 NA | NA | NA | NA | NA |
| Prss28     | 0 NA | NA | NA | NA | NA |
| Prss29     | 0 NA | NA | NA | NA | NA |
| Prss3      | 0 NA | NA | NA | NA | NA |
| Prss34     | 0 NA | NA | NA | NA | NA |
| Prss38     | 0 NA | NA | NA | NA | NA |
| Prss40     | 0 NA | NA | NA | NA | NA |
| Prss44     | 0 NA | NA | NA | NA | NA |
| Prss45     | 0 NA | NA | NA | NA | NA |
| Prss46     | 0 NA | NA | NA | NA | NA |
| Prss48     | 0 NA | NA | NA | NA | NA |
| Prss51     | 0 NA | NA | NA | NA | NA |
| Prss54     | 0 NA | NA | NA | NA | NA |
| Prss56     | 0 NA | NA | NA | NA | NA |
| Prss58     | 0 NA | NA | NA | NA | NA |
| Psg-ps1    | 0 NA | NA | NA | NA | NA |
| Psg18      | 0 NA | NA | NA | NA | NA |
| Psg21      | 0 NA | NA | NA | NA | NA |
| Psg26      | 0 NA | NA | NA | NA | NA |

|             |      |    |    |    |    |
|-------------|------|----|----|----|----|
| Psg27       | 0 NA | NA | NA | NA | NA |
| Psemb5-ps   | 0 NA | NA | NA | NA | NA |
| Psemb6-ps   | 0 NA | NA | NA | NA | NA |
| Psemb6-ps2  | 0 NA | NA | NA | NA | NA |
| Pspn        | 0 NA | NA | NA | NA | NA |
| Ptchd3      | 0 NA | NA | NA | NA | NA |
| Ptf1a       | 0 NA | NA | NA | NA | NA |
| Pth         | 0 NA | NA | NA | NA | NA |
| Pth2        | 0 NA | NA | NA | NA | NA |
| Ptma-ps1    | 0 NA | NA | NA | NA | NA |
| Ptx4        | 0 NA | NA | NA | NA | NA |
| Pudp        | 0 NA | NA | NA | NA | NA |
| Pvalb       | 0 NA | NA | NA | NA | NA |
| Pvrig-ps    | 0 NA | NA | NA | NA | NA |
| Pxt1        | 0 NA | NA | NA | NA | NA |
| Pyx         | 0 NA | NA | NA | NA | NA |
| Qrfpr       | 0 NA | NA | NA | NA | NA |
| Rab11b-ps2  | 0 NA | NA | NA | NA | NA |
| Rab5a-ps    | 0 NA | NA | NA | NA | NA |
| Rab9b-ps1   | 0 NA | NA | NA | NA | NA |
| Rad51ap2    | 0 NA | NA | NA | NA | NA |
| Ranbp2-ps1  | 0 NA | NA | NA | NA | NA |
| Ranbp2-ps10 | 0 NA | NA | NA | NA | NA |
| Ranbp2-ps11 | 0 NA | NA | NA | NA | NA |
| Ranbp2-ps12 | 0 NA | NA | NA | NA | NA |
| Ranbp2-ps2  | 0 NA | NA | NA | NA | NA |
| Ranbp2-ps3  | 0 NA | NA | NA | NA | NA |
| Ranbp2-ps4  | 0 NA | NA | NA | NA | NA |
| Ranbp2-ps5  | 0 NA | NA | NA | NA | NA |
| Ranbp2-ps6  | 0 NA | NA | NA | NA | NA |
| Ranbp2-ps7  | 0 NA | NA | NA | NA | NA |
| Ranbp2-ps8  | 0 NA | NA | NA | NA | NA |
| Ranbp2-ps9  | 0 NA | NA | NA | NA | NA |
| Rap1a-ps2   | 0 NA | NA | NA | NA | NA |
| Rax         | 0 NA | NA | NA | NA | NA |
| Rbm31y      | 0 NA | NA | NA | NA | NA |
| Rbm6-ps2    | 0 NA | NA | NA | NA | NA |
| Rbmy        | 0 NA | NA | NA | NA | NA |
| Rbpj-ps3    | 0 NA | NA | NA | NA | NA |
| Rbx1-ps     | 0 NA | NA | NA | NA | NA |
| Rcvrn       | 0 NA | NA | NA | NA | NA |
| Rd3l        | 0 NA | NA | NA | NA | NA |
| Rdh8        | 0 NA | NA | NA | NA | NA |
| Reg3d       | 0 NA | NA | NA | NA | NA |
| Rergl       | 0 NA | NA | NA | NA | NA |
| Resp18      | 0 NA | NA | NA | NA | NA |
| Rfpl4       | 0 NA | NA | NA | NA | NA |
| Rfx6        | 0 NA | NA | NA | NA | NA |
| Rhcg        | 0 NA | NA | NA | NA | NA |
| Rhd         | 0 NA | NA | NA | NA | NA |
| Rhoay-ps1   | 0 NA | NA | NA | NA | NA |
| Rhoay-ps2   | 0 NA | NA | NA | NA | NA |
| Rhoay-ps3   | 0 NA | NA | NA | NA | NA |
| Rhox1       | 0 NA | NA | NA | NA | NA |
| Rhox10      | 0 NA | NA | NA | NA | NA |
| Rhox11      | 0 NA | NA | NA | NA | NA |
| Rhox11-ps1  | 0 NA | NA | NA | NA | NA |
| Rhox11-ps2  | 0 NA | NA | NA | NA | NA |
| Rhox11-ps3  | 0 NA | NA | NA | NA | NA |
| Rhox12      | 0 NA | NA | NA | NA | NA |
| Rhox13      | 0 NA | NA | NA | NA | NA |
| Rhox2-ps    | 0 NA | NA | NA | NA | NA |
| Rhox2a      | 0 NA | NA | NA | NA | NA |
| Rhox2b      | 0 NA | NA | NA | NA | NA |
| Rhox2c      | 0 NA | NA | NA | NA | NA |
| Rhox2d      | 0 NA | NA | NA | NA | NA |

|             |      |    |    |    |    |
|-------------|------|----|----|----|----|
| Rhox2e      | 0 NA | NA | NA | NA | NA |
| Rhox2f      | 0 NA | NA | NA | NA | NA |
| Rhox2g      | 0 NA | NA | NA | NA | NA |
| Rhox2h      | 0 NA | NA | NA | NA | NA |
| Rhox3a      | 0 NA | NA | NA | NA | NA |
| Rhox3a2     | 0 NA | NA | NA | NA | NA |
| Rhox3b-ps   | 0 NA | NA | NA | NA | NA |
| Rhox3c      | 0 NA | NA | NA | NA | NA |
| Rhox3d-ps   | 0 NA | NA | NA | NA | NA |
| Rhox3e      | 0 NA | NA | NA | NA | NA |
| Rhox3f      | 0 NA | NA | NA | NA | NA |
| Rhox3g      | 0 NA | NA | NA | NA | NA |
| Rhox3h      | 0 NA | NA | NA | NA | NA |
| Rhox4a2     | 0 NA | NA | NA | NA | NA |
| Rhox6       | 0 NA | NA | NA | NA | NA |
| Rhox7-ps2   | 0 NA | NA | NA | NA | NA |
| Rhox7a      | 0 NA | NA | NA | NA | NA |
| Rhox7b      | 0 NA | NA | NA | NA | NA |
| Ribc2       | 0 NA | NA | NA | NA | NA |
| Ripply2     | 0 NA | NA | NA | NA | NA |
| Rit2        | 0 NA | NA | NA | NA | NA |
| Rlbp1       | 0 NA | NA | NA | NA | NA |
| Rnase11     | 0 NA | NA | NA | NA | NA |
| Rnase2b     | 0 NA | NA | NA | NA | NA |
| Rnase9      | 0 NA | NA | NA | NA | NA |
| Rnf112      | 0 NA | NA | NA | NA | NA |
| Rnf148      | 0 NA | NA | NA | NA | NA |
| Rnf224      | 0 NA | NA | NA | NA | NA |
| Ros1        | 0 NA | NA | NA | NA | NA |
| Rp31-ps19   | 0 NA | NA | NA | NA | NA |
| Rpap3-ps1   | 0 NA | NA | NA | NA | NA |
| Rpe65       | 0 NA | NA | NA | NA | NA |
| Rpl10-ps1   | 0 NA | NA | NA | NA | NA |
| Rpl10-ps4   | 0 NA | NA | NA | NA | NA |
| Rpl10a-ps3  | 0 NA | NA | NA | NA | NA |
| Rpl12-ps1   | 0 NA | NA | NA | NA | NA |
| Rpl13-ps2   | 0 NA | NA | NA | NA | NA |
| Rpl13-ps4   | 0 NA | NA | NA | NA | NA |
| Rpl13-ps5   | 0 NA | NA | NA | NA | NA |
| Rpl13a-ps1  | 0 NA | NA | NA | NA | NA |
| Rpl15-ps1   | 0 NA | NA | NA | NA | NA |
| Rpl15-ps4   | 0 NA | NA | NA | NA | NA |
| Rpl17-ps11  | 0 NA | NA | NA | NA | NA |
| Rpl17-ps2   | 0 NA | NA | NA | NA | NA |
| Rpl17-ps6   | 0 NA | NA | NA | NA | NA |
| Rpl18a-ps2  | 0 NA | NA | NA | NA | NA |
| Rpl18a-ps3  | 0 NA | NA | NA | NA | NA |
| Rpl18a-ps4  | 0 NA | NA | NA | NA | NA |
| Rpl19-ps2   | 0 NA | NA | NA | NA | NA |
| Rpl19-ps5   | 0 NA | NA | NA | NA | NA |
| Rpl21-ps13  | 0 NA | NA | NA | NA | NA |
| Rpl21-ps14  | 0 NA | NA | NA | NA | NA |
| Rpl21-ps15  | 0 NA | NA | NA | NA | NA |
| Rpl21-ps2   | 0 NA | NA | NA | NA | NA |
| Rpl21-ps4   | 0 NA | NA | NA | NA | NA |
| Rpl21-ps6   | 0 NA | NA | NA | NA | NA |
| Rpl21-ps9   | 0 NA | NA | NA | NA | NA |
| Rpl23a-ps1  | 0 NA | NA | NA | NA | NA |
| Rpl23a-ps10 | 0 NA | NA | NA | NA | NA |
| Rpl23a-ps11 | 0 NA | NA | NA | NA | NA |
| Rpl23a-ps12 | 0 NA | NA | NA | NA | NA |
| Rpl23a-ps14 | 0 NA | NA | NA | NA | NA |
| Rpl23a-ps2  | 0 NA | NA | NA | NA | NA |
| Rpl23a-ps5  | 0 NA | NA | NA | NA | NA |
| Rpl23a-ps6  | 0 NA | NA | NA | NA | NA |
| Rpl23a-ps7  | 0 NA | NA | NA | NA | NA |

|            |      |    |    |    |    |
|------------|------|----|----|----|----|
| Rpl23a-ps8 | 0 NA | NA | NA | NA | NA |
| Rpl23a-ps9 | 0 NA | NA | NA | NA | NA |
| Rpl26-ps1  | 0 NA | NA | NA | NA | NA |
| Rpl26-ps3  | 0 NA | NA | NA | NA | NA |
| Rpl26-ps4  | 0 NA | NA | NA | NA | NA |
| Rpl26-ps5  | 0 NA | NA | NA | NA | NA |
| Rpl26-ps6  | 0 NA | NA | NA | NA | NA |
| Rpl27a-ps1 | 0 NA | NA | NA | NA | NA |
| Rpl28-ps4  | 0 NA | NA | NA | NA | NA |
| Rpl29-ps5  | 0 NA | NA | NA | NA | NA |
| Rpl30-ps3  | 0 NA | NA | NA | NA | NA |
| Rpl30-ps5  | 0 NA | NA | NA | NA | NA |
| Rpl30-ps6  | 0 NA | NA | NA | NA | NA |
| Rpl31-ps1  | 0 NA | NA | NA | NA | NA |
| Rpl31-ps18 | 0 NA | NA | NA | NA | NA |
| Rpl31-ps22 | 0 NA | NA | NA | NA | NA |
| Rpl31-ps23 | 0 NA | NA | NA | NA | NA |
| Rpl31-ps24 | 0 NA | NA | NA | NA | NA |
| Rpl31-ps25 | 0 NA | NA | NA | NA | NA |
| Rpl31-ps5  | 0 NA | NA | NA | NA | NA |
| Rpl31-ps7  | 0 NA | NA | NA | NA | NA |
| Rpl31-ps9  | 0 NA | NA | NA | NA | NA |
| Rpl36-ps1  | 0 NA | NA | NA | NA | NA |
| Rpl36-ps10 | 0 NA | NA | NA | NA | NA |
| Rpl36-ps4  | 0 NA | NA | NA | NA | NA |
| Rpl36-ps7  | 0 NA | NA | NA | NA | NA |
| Rpl36-ps8  | 0 NA | NA | NA | NA | NA |
| Rpl36-ps9  | 0 NA | NA | NA | NA | NA |
| Rpl36a-ps3 | 0 NA | NA | NA | NA | NA |
| Rpl36a-ps4 | 0 NA | NA | NA | NA | NA |
| Rpl38-ps1  | 0 NA | NA | NA | NA | NA |
| Rpl38-ps2  | 0 NA | NA | NA | NA | NA |
| Rpl48-ps1  | 0 NA | NA | NA | NA | NA |
| Rpl7a-ps1  | 0 NA | NA | NA | NA | NA |
| Rpl7a-ps11 | 0 NA | NA | NA | NA | NA |
| Rpl7a-ps13 | 0 NA | NA | NA | NA | NA |
| Rpl7a-ps14 | 0 NA | NA | NA | NA | NA |
| Rpl7a-ps2  | 0 NA | NA | NA | NA | NA |
| Rpl7a-ps8  | 0 NA | NA | NA | NA | NA |
| Rpl7a-ps9  | 0 NA | NA | NA | NA | NA |
| Rpl711-ps1 | 0 NA | NA | NA | NA | NA |
| Rpl9-ps1   | 0 NA | NA | NA | NA | NA |
| Rpl9-ps2   | 0 NA | NA | NA | NA | NA |
| Rpl9-ps3   | 0 NA | NA | NA | NA | NA |
| Rpl9-ps8   | 0 NA | NA | NA | NA | NA |
| Rpl9-ps9   | 0 NA | NA | NA | NA | NA |
| Rplp1-ps1  | 0 NA | NA | NA | NA | NA |
| Rprml      | 0 NA | NA | NA | NA | NA |
| Rps10-ps3  | 0 NA | NA | NA | NA | NA |
| Rps10-ps4  | 0 NA | NA | NA | NA | NA |
| Rps11-ps2  | 0 NA | NA | NA | NA | NA |
| Rps11-ps3  | 0 NA | NA | NA | NA | NA |
| Rps11-ps5  | 0 NA | NA | NA | NA | NA |
| Rps12-ps10 | 0 NA | NA | NA | NA | NA |
| Rps12-ps11 | 0 NA | NA | NA | NA | NA |
| Rps12-ps12 | 0 NA | NA | NA | NA | NA |
| Rps12-ps13 | 0 NA | NA | NA | NA | NA |
| Rps12-ps14 | 0 NA | NA | NA | NA | NA |
| Rps12-ps15 | 0 NA | NA | NA | NA | NA |
| Rps12-ps16 | 0 NA | NA | NA | NA | NA |
| Rps12-ps17 | 0 NA | NA | NA | NA | NA |
| Rps12-ps18 | 0 NA | NA | NA | NA | NA |
| Rps12-ps2  | 0 NA | NA | NA | NA | NA |
| Rps12-ps23 | 0 NA | NA | NA | NA | NA |
| Rps12-ps5  | 0 NA | NA | NA | NA | NA |
| Rps12-ps6  | 0 NA | NA | NA | NA | NA |

|             |      |    |    |    |    |
|-------------|------|----|----|----|----|
| Rps12-ps7   | 0 NA | NA | NA | NA | NA |
| Rps12-ps9   | 0 NA | NA | NA | NA | NA |
| Rps13-ps5   | 0 NA | NA | NA | NA | NA |
| Rps13-ps8   | 0 NA | NA | NA | NA | NA |
| Rps15a-ps1  | 0 NA | NA | NA | NA | NA |
| Rps15a-ps2  | 0 NA | NA | NA | NA | NA |
| Rps15a-ps8  | 0 NA | NA | NA | NA | NA |
| Rps18-ps2   | 0 NA | NA | NA | NA | NA |
| Rps19-ps10  | 0 NA | NA | NA | NA | NA |
| Rps19-ps11  | 0 NA | NA | NA | NA | NA |
| Rps19-ps12  | 0 NA | NA | NA | NA | NA |
| Rps19-ps14  | 0 NA | NA | NA | NA | NA |
| Rps19-ps8   | 0 NA | NA | NA | NA | NA |
| Rps19-ps9   | 0 NA | NA | NA | NA | NA |
| Rps2-ps12   | 0 NA | NA | NA | NA | NA |
| Rps2-ps2    | 0 NA | NA | NA | NA | NA |
| Rps2-ps3    | 0 NA | NA | NA | NA | NA |
| Rps24-ps2   | 0 NA | NA | NA | NA | NA |
| Rps27-ps1   | 0 NA | NA | NA | NA | NA |
| Rps29-ps    | 0 NA | NA | NA | NA | NA |
| Rps4l-ps    | 0 NA | NA | NA | NA | NA |
| Rps7-ps1    | 0 NA | NA | NA | NA | NA |
| Rps8-ps2    | 0 NA | NA | NA | NA | NA |
| Rpsa-ps3    | 0 NA | NA | NA | NA | NA |
| Rpsa-ps5    | 0 NA | NA | NA | NA | NA |
| Rptn        | 0 NA | NA | NA | NA | NA |
| Rspo4       | 0 NA | NA | NA | NA | NA |
| Rtp2        | 0 NA | NA | NA | NA | NA |
| Rxfp2       | 0 NA | NA | NA | NA | NA |
| Rxfp4       | 0 NA | NA | NA | NA | NA |
| Ryk-ps1     | 0 NA | NA | NA | NA | NA |
| S100a7l2    | 0 NA | NA | NA | NA | NA |
| S100z       | 0 NA | NA | NA | NA | NA |
| Samt1       | 0 NA | NA | NA | NA | NA |
| Samt1b      | 0 NA | NA | NA | NA | NA |
| Samt1c      | 0 NA | NA | NA | NA | NA |
| Samt1d      | 0 NA | NA | NA | NA | NA |
| Samt2       | 0 NA | NA | NA | NA | NA |
| Samt2b      | 0 NA | NA | NA | NA | NA |
| Samt3       | 0 NA | NA | NA | NA | NA |
| Samt4       | 0 NA | NA | NA | NA | NA |
| Satl1       | 0 NA | NA | NA | NA | NA |
| Sbp         | 0 NA | NA | NA | NA | NA |
| Sbpl        | 0 NA | NA | NA | NA | NA |
| Scg3        | 0 NA | NA | NA | NA | NA |
| Scgb1a1     | 0 NA | NA | NA | NA | NA |
| Scgb1b1-ps  | 0 NA | NA | NA | NA | NA |
| Scgb1b10    | 0 NA | NA | NA | NA | NA |
| Scgb1b11    | 0 NA | NA | NA | NA | NA |
| Scgb1b12    | 0 NA | NA | NA | NA | NA |
| Scgb1b13-ps | 0 NA | NA | NA | NA | NA |
| Scgb1b14-ps | 0 NA | NA | NA | NA | NA |
| Scgb1b15    | 0 NA | NA | NA | NA | NA |
| Scgb1b16-ps | 0 NA | NA | NA | NA | NA |
| Scgb1b17    | 0 NA | NA | NA | NA | NA |
| Scgb1b18    | 0 NA | NA | NA | NA | NA |
| Scgb1b19    | 0 NA | NA | NA | NA | NA |
| Scgb1b2     | 0 NA | NA | NA | NA | NA |
| Scgb1b20    | 0 NA | NA | NA | NA | NA |
| Scgb1b21    | 0 NA | NA | NA | NA | NA |
| Scgb1b22-ps | 0 NA | NA | NA | NA | NA |
| Scgb1b23-ps | 0 NA | NA | NA | NA | NA |
| Scgb1b24    | 0 NA | NA | NA | NA | NA |
| Scgb1b25-ps | 0 NA | NA | NA | NA | NA |
| Scgb1b26-ps | 0 NA | NA | NA | NA | NA |
| Scgb1b27    | 0 NA | NA | NA | NA | NA |

|              |      |    |    |    |    |
|--------------|------|----|----|----|----|
| Scgb1b28-ps  | 0 NA | NA | NA | NA | NA |
| Scgb1b29     | 0 NA | NA | NA | NA | NA |
| Scgb1b3      | 0 NA | NA | NA | NA | NA |
| Scgb1b30     | 0 NA | NA | NA | NA | NA |
| Scgb1b34-ps  | 0 NA | NA | NA | NA | NA |
| Scgb1b4-ps   | 0 NA | NA | NA | NA | NA |
| Scgb1b5-ps   | 0 NA | NA | NA | NA | NA |
| Scgb1b6-ps   | 0 NA | NA | NA | NA | NA |
| Scgb1b7      | 0 NA | NA | NA | NA | NA |
| Scgb1b8-ps   | 0 NA | NA | NA | NA | NA |
| Scgb1b9-ps   | 0 NA | NA | NA | NA | NA |
| Scgb2a2      | 0 NA | NA | NA | NA | NA |
| Scgb2b1      | 0 NA | NA | NA | NA | NA |
| Scgb2b10     | 0 NA | NA | NA | NA | NA |
| Scgb2b11     | 0 NA | NA | NA | NA | NA |
| Scgb2b12     | 0 NA | NA | NA | NA | NA |
| Scgb2b13-ps  | 0 NA | NA | NA | NA | NA |
| Scgb2b14-ps  | 0 NA | NA | NA | NA | NA |
| Scgb2b15     | 0 NA | NA | NA | NA | NA |
| Scgb2b16-ps  | 0 NA | NA | NA | NA | NA |
| Scgb2b17     | 0 NA | NA | NA | NA | NA |
| Scgb2b18     | 0 NA | NA | NA | NA | NA |
| Scgb2b19     | 0 NA | NA | NA | NA | NA |
| Scgb2b2      | 0 NA | NA | NA | NA | NA |
| Scgb2b20     | 0 NA | NA | NA | NA | NA |
| Scgb2b21     | 0 NA | NA | NA | NA | NA |
| Scgb2b22-ps  | 0 NA | NA | NA | NA | NA |
| Scgb2b23-ps  | 0 NA | NA | NA | NA | NA |
| Scgb2b24     | 0 NA | NA | NA | NA | NA |
| Scgb2b25-ps  | 0 NA | NA | NA | NA | NA |
| Scgb2b26     | 0 NA | NA | NA | NA | NA |
| Scgb2b27     | 0 NA | NA | NA | NA | NA |
| Scgb2b28-ps  | 0 NA | NA | NA | NA | NA |
| Scgb2b29-ps  | 0 NA | NA | NA | NA | NA |
| Scgb2b3      | 0 NA | NA | NA | NA | NA |
| Scgb2b30     | 0 NA | NA | NA | NA | NA |
| Scgb2b31-ps  | 0 NA | NA | NA | NA | NA |
| Scgb2b32-ps  | 0 NA | NA | NA | NA | NA |
| Scgb2b33     | 0 NA | NA | NA | NA | NA |
| Scgb2b4-ps   | 0 NA | NA | NA | NA | NA |
| Scgb2b5-ps   | 0 NA | NA | NA | NA | NA |
| Scgb2b6      | 0 NA | NA | NA | NA | NA |
| Scgb2b7      | 0 NA | NA | NA | NA | NA |
| Scgb2b8-ps   | 0 NA | NA | NA | NA | NA |
| Scgb2b9-ps   | 0 NA | NA | NA | NA | NA |
| Scgb3a2      | 0 NA | NA | NA | NA | NA |
| Scp2d1       | 0 NA | NA | NA | NA | NA |
| Scrt1        | 0 NA | NA | NA | NA | NA |
| Scrt2        | 0 NA | NA | NA | NA | NA |
| Sdr16c6      | 0 NA | NA | NA | NA | NA |
| Sel112       | 0 NA | NA | NA | NA | NA |
| Selenok-ps4  | 0 NA | NA | NA | NA | NA |
| Selenok-ps5  | 0 NA | NA | NA | NA | NA |
| Selenok-ps7  | 0 NA | NA | NA | NA | NA |
| Selenok-ps8  | 0 NA | NA | NA | NA | NA |
| Selenot-ps   | 0 NA | NA | NA | NA | NA |
| Serpina3l-ps | 0 NA | NA | NA | NA | NA |
| Serpinb1-ps1 | 0 NA | NA | NA | NA | NA |
| Serpinb11    | 0 NA | NA | NA | NA | NA |
| Serpinb3a    | 0 NA | NA | NA | NA | NA |
| Serpinb3c    | 0 NA | NA | NA | NA | NA |
| Serpinb3d    | 0 NA | NA | NA | NA | NA |
| Serpinb6d    | 0 NA | NA | NA | NA | NA |
| Serpinb6e    | 0 NA | NA | NA | NA | NA |
| Serpinb9c    | 0 NA | NA | NA | NA | NA |
| Serpinb9d    | 0 NA | NA | NA | NA | NA |

|            |      |    |    |    |    |
|------------|------|----|----|----|----|
| Serpinb9f  | 0 NA | NA | NA | NA | NA |
| Serpinb9h  | 0 NA | NA | NA | NA | NA |
| Sftpc      | 0 NA | NA | NA | NA | NA |
| Sgo2b      | 0 NA | NA | NA | NA | NA |
| Sh3d2c-ps1 | 0 NA | NA | NA | NA | NA |
| Shoc1      | 0 NA | NA | NA | NA | NA |
| Siah1-ps2  | 0 NA | NA | NA | NA | NA |
| Siglec15   | 0 NA | NA | NA | NA | NA |
| Sim2       | 0 NA | NA | NA | NA | NA |
| Skint10    | 0 NA | NA | NA | NA | NA |
| Skint11    | 0 NA | NA | NA | NA | NA |
| Skint5     | 0 NA | NA | NA | NA | NA |
| Skint6     | 0 NA | NA | NA | NA | NA |
| Skint9     | 0 NA | NA | NA | NA | NA |
| Skiv2l-ps1 | 0 NA | NA | NA | NA | NA |
| Skor2      | 0 NA | NA | NA | NA | NA |
| Slc12a1    | 0 NA | NA | NA | NA | NA |
| Slc14a2    | 0 NA | NA | NA | NA | NA |
| Slc18a3    | 0 NA | NA | NA | NA | NA |
| Slc22a16   | 0 NA | NA | NA | NA | NA |
| Slc22a2    | 0 NA | NA | NA | NA | NA |
| Slc22a20   | 0 NA | NA | NA | NA | NA |
| Slc22a6    | 0 NA | NA | NA | NA | NA |
| Slc24a2    | 0 NA | NA | NA | NA | NA |
| Slc25a41   | 0 NA | NA | NA | NA | NA |
| Slc25a54   | 0 NA | NA | NA | NA | NA |
| Slc32a1    | 0 NA | NA | NA | NA | NA |
| Slc34a3    | 0 NA | NA | NA | NA | NA |
| Slc35f4    | 0 NA | NA | NA | NA | NA |
| Slc35g3    | 0 NA | NA | NA | NA | NA |
| Slc39a1-ps | 0 NA | NA | NA | NA | NA |
| Slc46a2    | 0 NA | NA | NA | NA | NA |
| Slc51a     | 0 NA | NA | NA | NA | NA |
| Slc5a10    | 0 NA | NA | NA | NA | NA |
| Slc5a12    | 0 NA | NA | NA | NA | NA |
| Slc5a2     | 0 NA | NA | NA | NA | NA |
| Slc5a4a    | 0 NA | NA | NA | NA | NA |
| Slc5a7     | 0 NA | NA | NA | NA | NA |
| Slc6a11    | 0 NA | NA | NA | NA | NA |
| Slc7a12    | 0 NA | NA | NA | NA | NA |
| Slco6d1    | 0 NA | NA | NA | NA | NA |
| Slitrk1    | 0 NA | NA | NA | NA | NA |
| Sln        | 0 NA | NA | NA | NA | NA |
| Slurp1     | 0 NA | NA | NA | NA | NA |
| Slurp2     | 0 NA | NA | NA | NA | NA |
| Slx        | 0 NA | NA | NA | NA | NA |
| Slxl1      | 0 NA | NA | NA | NA | NA |
| Smgc       | 0 NA | NA | NA | NA | NA |
| Smim18     | 0 NA | NA | NA | NA | NA |
| Smim23     | 0 NA | NA | NA | NA | NA |
| Smim40-ps  | 0 NA | NA | NA | NA | NA |
| Smok2a     | 0 NA | NA | NA | NA | NA |
| Smok2b     | 0 NA | NA | NA | NA | NA |
| Smpx       | 0 NA | NA | NA | NA | NA |
| Smr2       | 0 NA | NA | NA | NA | NA |
| Smr3a      | 0 NA | NA | NA | NA | NA |
| Smt3h1-ps  | 0 NA | NA | NA | NA | NA |
| Smt3h2-ps  | 0 NA | NA | NA | NA | NA |
| Smt3h2-ps2 | 0 NA | NA | NA | NA | NA |
| Smt3h2-ps4 | 0 NA | NA | NA | NA | NA |
| Snrp1c-ps1 | 0 NA | NA | NA | NA | NA |
| Sntn       | 0 NA | NA | NA | NA | NA |
| Sohlh1     | 0 NA | NA | NA | NA | NA |
| Sohlh2     | 0 NA | NA | NA | NA | NA |
| Sowahd     | 0 NA | NA | NA | NA | NA |
| Sox14      | 0 NA | NA | NA | NA | NA |

|            |      |    |    |    |    |
|------------|------|----|----|----|----|
| Sox21      | 0 NA | NA | NA | NA | NA |
| Sox3       | 0 NA | NA | NA | NA | NA |
| Spaca3     | 0 NA | NA | NA | NA | NA |
| Spaca4     | 0 NA | NA | NA | NA | NA |
| Spaca5     | 0 NA | NA | NA | NA | NA |
| Spag11a    | 0 NA | NA | NA | NA | NA |
| Spag11b    | 0 NA | NA | NA | NA | NA |
| Spam1      | 0 NA | NA | NA | NA | NA |
| Spanxn4    | 0 NA | NA | NA | NA | NA |
| Spata16    | 0 NA | NA | NA | NA | NA |
| Spata18    | 0 NA | NA | NA | NA | NA |
| Spata21    | 0 NA | NA | NA | NA | NA |
| Spata31    | 0 NA | NA | NA | NA | NA |
| Spata31d1b | 0 NA | NA | NA | NA | NA |
| Spata31d1c | 0 NA | NA | NA | NA | NA |
| Spata31d1d | 0 NA | NA | NA | NA | NA |
| Spata4     | 0 NA | NA | NA | NA | NA |
| Spata46    | 0 NA | NA | NA | NA | NA |
| Spats1     | 0 NA | NA | NA | NA | NA |
| Spcs2-ps   | 0 NA | NA | NA | NA | NA |
| Spdye4a    | 0 NA | NA | NA | NA | NA |
| Spdye4c    | 0 NA | NA | NA | NA | NA |
| Speer1     | 0 NA | NA | NA | NA | NA |
| Speer4a    | 0 NA | NA | NA | NA | NA |
| Speer4b    | 0 NA | NA | NA | NA | NA |
| Speer4c    | 0 NA | NA | NA | NA | NA |
| Speer4d    | 0 NA | NA | NA | NA | NA |
| Speer4e    | 0 NA | NA | NA | NA | NA |
| Speer4f1   | 0 NA | NA | NA | NA | NA |
| Speer4f2   | 0 NA | NA | NA | NA | NA |
| Spem2      | 0 NA | NA | NA | NA | NA |
| Spert      | 0 NA | NA | NA | NA | NA |
| Spertl     | 0 NA | NA | NA | NA | NA |
| Spesp1     | 0 NA | NA | NA | NA | NA |
| Spin2-ps1  | 0 NA | NA | NA | NA | NA |
| Spin2-ps2  | 0 NA | NA | NA | NA | NA |
| Spin2-ps3  | 0 NA | NA | NA | NA | NA |
| Spin2-ps4  | 0 NA | NA | NA | NA | NA |
| Spin2d     | 0 NA | NA | NA | NA | NA |
| Spin2e     | 0 NA | NA | NA | NA | NA |
| Spin2f     | 0 NA | NA | NA | NA | NA |
| Spin2g     | 0 NA | NA | NA | NA | NA |
| Spin3-ps   | 0 NA | NA | NA | NA | NA |
| Spink11    | 0 NA | NA | NA | NA | NA |
| Spink12    | 0 NA | NA | NA | NA | NA |
| Spink13    | 0 NA | NA | NA | NA | NA |
| Spink14    | 0 NA | NA | NA | NA | NA |
| Spink6     | 0 NA | NA | NA | NA | NA |
| Spink7     | 0 NA | NA | NA | NA | NA |
| Spink8     | 0 NA | NA | NA | NA | NA |
| Spinkl     | 0 NA | NA | NA | NA | NA |
| Spint4     | 0 NA | NA | NA | NA | NA |
| Spint5     | 0 NA | NA | NA | NA | NA |
| Spn-ps     | 0 NA | NA | NA | NA | NA |
| Spocd1     | 0 NA | NA | NA | NA | NA |
| Spopfm1    | 0 NA | NA | NA | NA | NA |
| Spopfm3    | 0 NA | NA | NA | NA | NA |
| Sppl2c     | 0 NA | NA | NA | NA | NA |
| Sprr2a1    | 0 NA | NA | NA | NA | NA |
| Sprr2a3    | 0 NA | NA | NA | NA | NA |
| Sprr2c-ps  | 0 NA | NA | NA | NA | NA |
| Sprr2d     | 0 NA | NA | NA | NA | NA |
| Sprr2e     | 0 NA | NA | NA | NA | NA |
| Sprr2f     | 0 NA | NA | NA | NA | NA |
| Sprr2g     | 0 NA | NA | NA | NA | NA |
| Sprr2h     | 0 NA | NA | NA | NA | NA |



|             |      |    |    |    |    |
|-------------|------|----|----|----|----|
| Sprr2i      | 0 NA | NA | NA | NA | NA |
| Sprr2j-ps   | 0 NA | NA | NA | NA | NA |
| Sprr2k      | 0 NA | NA | NA | NA | NA |
| Sprr3       | 0 NA | NA | NA | NA | NA |
| Sprr4       | 0 NA | NA | NA | NA | NA |
| Sptlc3      | 0 NA | NA | NA | NA | NA |
| Spz1        | 0 NA | NA | NA | NA | NA |
| Srarp       | 0 NA | NA | NA | NA | NA |
| Srsx        | 0 NA | NA | NA | NA | NA |
| Srsy        | 0 NA | NA | NA | NA | NA |
| Sstr1       | 0 NA | NA | NA | NA | NA |
| Sstr5       | 0 NA | NA | NA | NA | NA |
| Ssty1       | 0 NA | NA | NA | NA | NA |
| Ssty2       | 0 NA | NA | NA | NA | NA |
| Ssx9        | 0 NA | NA | NA | NA | NA |
| Ssxa1       | 0 NA | NA | NA | NA | NA |
| Ssxb1       | 0 NA | NA | NA | NA | NA |
| Ssxb10      | 0 NA | NA | NA | NA | NA |
| Ssxb3       | 0 NA | NA | NA | NA | NA |
| Ssxb6       | 0 NA | NA | NA | NA | NA |
| Ssxb8       | 0 NA | NA | NA | NA | NA |
| Ssxb9       | 0 NA | NA | NA | NA | NA |
| St8sia5     | 0 NA | NA | NA | NA | NA |
| Stambp-ps1  | 0 NA | NA | NA | NA | NA |
| Stambp-ps2  | 0 NA | NA | NA | NA | NA |
| Stfa3       | 0 NA | NA | NA | NA | NA |
| Stk-ps1     | 0 NA | NA | NA | NA | NA |
| Stk19-ps1   | 0 NA | NA | NA | NA | NA |
| Stk31       | 0 NA | NA | NA | NA | NA |
| Stmn3       | 0 NA | NA | NA | NA | NA |
| Strit1      | 0 NA | NA | NA | NA | NA |
| Stxbp3-ps   | 0 NA | NA | NA | NA | NA |
| Sult1c1     | 0 NA | NA | NA | NA | NA |
| Sult1c2-ps1 | 0 NA | NA | NA | NA | NA |
| Sult1c2-ps2 | 0 NA | NA | NA | NA | NA |
| Sult2a-ps1  | 0 NA | NA | NA | NA | NA |
| Sult2a-ps2  | 0 NA | NA | NA | NA | NA |
| Sult2a-ps3  | 0 NA | NA | NA | NA | NA |
| Sult2a-ps4  | 0 NA | NA | NA | NA | NA |
| Sult2a6     | 0 NA | NA | NA | NA | NA |
| Sult3a2     | 0 NA | NA | NA | NA | NA |
| Sun5        | 0 NA | NA | NA | NA | NA |
| Supt20-ps   | 0 NA | NA | NA | NA | NA |
| Supt4b      | 0 NA | NA | NA | NA | NA |
| Sva         | 0 NA | NA | NA | NA | NA |
| Sval1       | 0 NA | NA | NA | NA | NA |
| Sval2       | 0 NA | NA | NA | NA | NA |
| Sval3       | 0 NA | NA | NA | NA | NA |
| Svs1        | 0 NA | NA | NA | NA | NA |
| Svs2        | 0 NA | NA | NA | NA | NA |
| Svs3a       | 0 NA | NA | NA | NA | NA |
| Svs3b       | 0 NA | NA | NA | NA | NA |
| Svs4        | 0 NA | NA | NA | NA | NA |
| Svs5        | 0 NA | NA | NA | NA | NA |
| Svs6        | 0 NA | NA | NA | NA | NA |
| Syce1       | 0 NA | NA | NA | NA | NA |
| Syce1l      | 0 NA | NA | NA | NA | NA |
| Sycp1-ps1   | 0 NA | NA | NA | NA | NA |
| Syt10       | 0 NA | NA | NA | NA | NA |
| Syt16       | 0 NA | NA | NA | NA | NA |
| Syt2        | 0 NA | NA | NA | NA | NA |
| T           | 0 NA | NA | NA | NA | NA |
| Taar2       | 0 NA | NA | NA | NA | NA |
| Taar3       | 0 NA | NA | NA | NA | NA |
| Taar4       | 0 NA | NA | NA | NA | NA |
| Taar5       | 0 NA | NA | NA | NA | NA |

|              |      |    |    |    |    |
|--------------|------|----|----|----|----|
| Taar6        | 0 NA | NA | NA | NA | NA |
| Taar7a       | 0 NA | NA | NA | NA | NA |
| Taar7b       | 0 NA | NA | NA | NA | NA |
| Taar7c-ps    | 0 NA | NA | NA | NA | NA |
| Taar7d       | 0 NA | NA | NA | NA | NA |
| Taar7e       | 0 NA | NA | NA | NA | NA |
| Taar7f       | 0 NA | NA | NA | NA | NA |
| Taar8a       | 0 NA | NA | NA | NA | NA |
| Taar8b       | 0 NA | NA | NA | NA | NA |
| Taar8c       | 0 NA | NA | NA | NA | NA |
| Taar9        | 0 NA | NA | NA | NA | NA |
| Tac2         | 0 NA | NA | NA | NA | NA |
| Taf9-ps      | 0 NA | NA | NA | NA | NA |
| Tafa4        | 0 NA | NA | NA | NA | NA |
| Tas2r102     | 0 NA | NA | NA | NA | NA |
| Tas2r103     | 0 NA | NA | NA | NA | NA |
| Tas2r104     | 0 NA | NA | NA | NA | NA |
| Tas2r105     | 0 NA | NA | NA | NA | NA |
| Tas2r106     | 0 NA | NA | NA | NA | NA |
| Tas2r107     | 0 NA | NA | NA | NA | NA |
| Tas2r109     | 0 NA | NA | NA | NA | NA |
| Tas2r110     | 0 NA | NA | NA | NA | NA |
| Tas2r111-ps2 | 0 NA | NA | NA | NA | NA |
| Tas2r113     | 0 NA | NA | NA | NA | NA |
| Tas2r114     | 0 NA | NA | NA | NA | NA |
| Tas2r115     | 0 NA | NA | NA | NA | NA |
| Tas2r116     | 0 NA | NA | NA | NA | NA |
| Tas2r117     | 0 NA | NA | NA | NA | NA |
| Tas2r118     | 0 NA | NA | NA | NA | NA |
| Tas2r119     | 0 NA | NA | NA | NA | NA |
| Tas2r120     | 0 NA | NA | NA | NA | NA |
| Tas2r121     | 0 NA | NA | NA | NA | NA |
| Tas2r122     | 0 NA | NA | NA | NA | NA |
| Tas2r123     | 0 NA | NA | NA | NA | NA |
| Tas2r124     | 0 NA | NA | NA | NA | NA |
| Tas2r125     | 0 NA | NA | NA | NA | NA |
| Tas2r126     | 0 NA | NA | NA | NA | NA |
| Tas2r129     | 0 NA | NA | NA | NA | NA |
| Tas2r130     | 0 NA | NA | NA | NA | NA |
| Tas2r131     | 0 NA | NA | NA | NA | NA |
| Tas2r134     | 0 NA | NA | NA | NA | NA |
| Tas2r136     | 0 NA | NA | NA | NA | NA |
| Tas2r139     | 0 NA | NA | NA | NA | NA |
| Tas2r140     | 0 NA | NA | NA | NA | NA |
| Tas2r142-ps5 | 0 NA | NA | NA | NA | NA |
| Tas2r143     | 0 NA | NA | NA | NA | NA |
| Tas2r144     | 0 NA | NA | NA | NA | NA |
| Tas2r145-ps3 | 0 NA | NA | NA | NA | NA |
| Tas2r146-ps1 | 0 NA | NA | NA | NA | NA |
| Tbc1d21      | 0 NA | NA | NA | NA | NA |
| Tbpl2        | 0 NA | NA | NA | NA | NA |
| Tbx22        | 0 NA | NA | NA | NA | NA |
| Tcaf3        | 0 NA | NA | NA | NA | NA |
| Tcea1-ps1    | 0 NA | NA | NA | NA | NA |
| Tceal6       | 0 NA | NA | NA | NA | NA |
| Tcl1b1       | 0 NA | NA | NA | NA | NA |
| Tcl1b2       | 0 NA | NA | NA | NA | NA |
| Tcl1b3       | 0 NA | NA | NA | NA | NA |
| Tcl1b4       | 0 NA | NA | NA | NA | NA |
| Tcl1b5       | 0 NA | NA | NA | NA | NA |
| Tcp1-ps1     | 0 NA | NA | NA | NA | NA |
| Tcp10a       | 0 NA | NA | NA | NA | NA |
| Tcp10c       | 0 NA | NA | NA | NA | NA |
| Tcstv3       | 0 NA | NA | NA | NA | NA |
| Tctex1d1     | 0 NA | NA | NA | NA | NA |
| Tdgf1-ps2    | 0 NA | NA | NA | NA | NA |

|             |      |    |    |    |    |
|-------------|------|----|----|----|----|
| Tdpoz1      | 0 NA | NA | NA | NA | NA |
| Tdpoz2      | 0 NA | NA | NA | NA | NA |
| Tdpoz3      | 0 NA | NA | NA | NA | NA |
| Tdpoz4      | 0 NA | NA | NA | NA | NA |
| Tdpoz5      | 0 NA | NA | NA | NA | NA |
| Tdpoz6      | 0 NA | NA | NA | NA | NA |
| Tdpoz7      | 0 NA | NA | NA | NA | NA |
| Tdpoz9      | 0 NA | NA | NA | NA | NA |
| Tecrl       | 0 NA | NA | NA | NA | NA |
| Teddm1a     | 0 NA | NA | NA | NA | NA |
| Tekt3       | 0 NA | NA | NA | NA | NA |
| Tent5d      | 0 NA | NA | NA | NA | NA |
| Terb2       | 0 NA | NA | NA | NA | NA |
| Tescl       | 0 NA | NA | NA | NA | NA |
| Tex101      | 0 NA | NA | NA | NA | NA |
| Tex13a      | 0 NA | NA | NA | NA | NA |
| Tex13c2     | 0 NA | NA | NA | NA | NA |
| Tex13c3     | 0 NA | NA | NA | NA | NA |
| Tex16       | 0 NA | NA | NA | NA | NA |
| Tex19.2     | 0 NA | NA | NA | NA | NA |
| Tex21       | 0 NA | NA | NA | NA | NA |
| Tex24       | 0 NA | NA | NA | NA | NA |
| Tex28       | 0 NA | NA | NA | NA | NA |
| Tex35       | 0 NA | NA | NA | NA | NA |
| Tex36       | 0 NA | NA | NA | NA | NA |
| Tex37       | 0 NA | NA | NA | NA | NA |
| Tex44       | 0 NA | NA | NA | NA | NA |
| Tex46       | 0 NA | NA | NA | NA | NA |
| Tex47       | 0 NA | NA | NA | NA | NA |
| Tex48       | 0 NA | NA | NA | NA | NA |
| Tex50       | 0 NA | NA | NA | NA | NA |
| Tex55       | 0 NA | NA | NA | NA | NA |
| Tfap2d      | 0 NA | NA | NA | NA | NA |
| Tgif1-ps    | 0 NA | NA | NA | NA | NA |
| Tgif2-ps1   | 0 NA | NA | NA | NA | NA |
| Tgif2-ps2   | 0 NA | NA | NA | NA | NA |
| Tgif2lx1    | 0 NA | NA | NA | NA | NA |
| Tgif2lx2    | 0 NA | NA | NA | NA | NA |
| Tgm6        | 0 NA | NA | NA | NA | NA |
| Th          | 0 NA | NA | NA | NA | NA |
| Tktl2       | 0 NA | NA | NA | NA | NA |
| Tle7        | 0 NA | NA | NA | NA | NA |
| Tmbim7      | 0 NA | NA | NA | NA | NA |
| Tmc4-ps     | 0 NA | NA | NA | NA | NA |
| Tmco5       | 0 NA | NA | NA | NA | NA |
| Tmco5b      | 0 NA | NA | NA | NA | NA |
| Tmed11      | 0 NA | NA | NA | NA | NA |
| Tmem114     | 0 NA | NA | NA | NA | NA |
| Tmem132b    | 0 NA | NA | NA | NA | NA |
| Tmem167-ps1 | 0 NA | NA | NA | NA | NA |
| Tmem167-ps2 | 0 NA | NA | NA | NA | NA |
| Tmem167-ps3 | 0 NA | NA | NA | NA | NA |
| Tmem182     | 0 NA | NA | NA | NA | NA |
| Tmem210     | 0 NA | NA | NA | NA | NA |
| Tmem213     | 0 NA | NA | NA | NA | NA |
| Tmem225     | 0 NA | NA | NA | NA | NA |
| Tmem229b-ps | 0 NA | NA | NA | NA | NA |
| Tmem232     | 0 NA | NA | NA | NA | NA |
| Tmem233     | 0 NA | NA | NA | NA | NA |
| Tmem238l    | 0 NA | NA | NA | NA | NA |
| Tmem247     | 0 NA | NA | NA | NA | NA |
| Tmem270     | 0 NA | NA | NA | NA | NA |
| Tmem274     | 0 NA | NA | NA | NA | NA |
| Tmem45a2    | 0 NA | NA | NA | NA | NA |
| Tmprss11c   | 0 NA | NA | NA | NA | NA |
| Tmprss11f   | 0 NA | NA | NA | NA | NA |

|            |      |    |    |    |    |
|------------|------|----|----|----|----|
| Tnmd       | 0 NA | NA | NA | NA | NA |
| Tnn        | 0 NA | NA | NA | NA | NA |
| Tnni3k     | 0 NA | NA | NA | NA | NA |
| Tnp1       | 0 NA | NA | NA | NA | NA |
| Tnp2       | 0 NA | NA | NA | NA | NA |
| Tnxa       | 0 NA | NA | NA | NA | NA |
| Topaz1     | 0 NA | NA | NA | NA | NA |
| Topbp1-ps1 | 0 NA | NA | NA | NA | NA |
| Topbp1-ps2 | 0 NA | NA | NA | NA | NA |
| Toporsl    | 0 NA | NA | NA | NA | NA |
| Tpbpb      | 0 NA | NA | NA | NA | NA |
| Tph2       | 0 NA | NA | NA | NA | NA |
| Tpi-rs2    | 0 NA | NA | NA | NA | NA |
| Tpi-rs5    | 0 NA | NA | NA | NA | NA |
| Tpi-rs8    | 0 NA | NA | NA | NA | NA |
| Tpi-rs9    | 0 NA | NA | NA | NA | NA |
| Tpm3-rs2   | 0 NA | NA | NA | NA | NA |
| Tprg       | 0 NA | NA | NA | NA | NA |
| Tpt1-ps1   | 0 NA | NA | NA | NA | NA |
| Tpt1-ps2   | 0 NA | NA | NA | NA | NA |
| Tpt1-ps4   | 0 NA | NA | NA | NA | NA |
| Tra2b-ps   | 0 NA | NA | NA | NA | NA |
| Traj1      | 0 NA | NA | NA | NA | NA |
| Traj11     | 0 NA | NA | NA | NA | NA |
| Traj12     | 0 NA | NA | NA | NA | NA |
| Traj13     | 0 NA | NA | NA | NA | NA |
| Traj14     | 0 NA | NA | NA | NA | NA |
| Traj16     | 0 NA | NA | NA | NA | NA |
| Traj17     | 0 NA | NA | NA | NA | NA |
| Traj18     | 0 NA | NA | NA | NA | NA |
| Traj20     | 0 NA | NA | NA | NA | NA |
| Traj21     | 0 NA | NA | NA | NA | NA |
| Traj23     | 0 NA | NA | NA | NA | NA |
| Traj24     | 0 NA | NA | NA | NA | NA |
| Traj25     | 0 NA | NA | NA | NA | NA |
| Traj26     | 0 NA | NA | NA | NA | NA |
| Traj27     | 0 NA | NA | NA | NA | NA |
| Traj28     | 0 NA | NA | NA | NA | NA |
| Traj29     | 0 NA | NA | NA | NA | NA |
| Traj30     | 0 NA | NA | NA | NA | NA |
| Traj31     | 0 NA | NA | NA | NA | NA |
| Traj33     | 0 NA | NA | NA | NA | NA |
| Traj34     | 0 NA | NA | NA | NA | NA |
| Traj35     | 0 NA | NA | NA | NA | NA |
| Traj36     | 0 NA | NA | NA | NA | NA |
| Traj38     | 0 NA | NA | NA | NA | NA |
| Traj39     | 0 NA | NA | NA | NA | NA |
| Traj40     | 0 NA | NA | NA | NA | NA |
| Traj41     | 0 NA | NA | NA | NA | NA |
| Traj42     | 0 NA | NA | NA | NA | NA |
| Traj43     | 0 NA | NA | NA | NA | NA |
| Traj44     | 0 NA | NA | NA | NA | NA |
| Traj45     | 0 NA | NA | NA | NA | NA |
| Traj46     | 0 NA | NA | NA | NA | NA |
| Traj47     | 0 NA | NA | NA | NA | NA |
| Traj48     | 0 NA | NA | NA | NA | NA |
| Traj49     | 0 NA | NA | NA | NA | NA |
| Traj5      | 0 NA | NA | NA | NA | NA |
| Traj50     | 0 NA | NA | NA | NA | NA |
| Traj51     | 0 NA | NA | NA | NA | NA |
| Traj52     | 0 NA | NA | NA | NA | NA |
| Traj53     | 0 NA | NA | NA | NA | NA |
| Traj54     | 0 NA | NA | NA | NA | NA |
| Traj55     | 0 NA | NA | NA | NA | NA |
| Traj56     | 0 NA | NA | NA | NA | NA |
| Traj57     | 0 NA | NA | NA | NA | NA |

|                  |      |    |    |    |    |
|------------------|------|----|----|----|----|
| Traj58           | 0 NA | NA | NA | NA | NA |
| Traj59           | 0 NA | NA | NA | NA | NA |
| Traj6            | 0 NA | NA | NA | NA | NA |
| Traj60           | 0 NA | NA | NA | NA | NA |
| Traj61           | 0 NA | NA | NA | NA | NA |
| Traj7            | 0 NA | NA | NA | NA | NA |
| Traj8            | 0 NA | NA | NA | NA | NA |
| Traj9            | 0 NA | NA | NA | NA | NA |
| Tram111          | 0 NA | NA | NA | NA | NA |
| Trappc3l         | 0 NA | NA | NA | NA | NA |
| Trav1            | 0 NA | NA | NA | NA | NA |
| Trav10d          | 0 NA | NA | NA | NA | NA |
| Trav10n          | 0 NA | NA | NA | NA | NA |
| Trav11           | 0 NA | NA | NA | NA | NA |
| Trav11n          | 0 NA | NA | NA | NA | NA |
| Trav12-3         | 0 NA | NA | NA | NA | NA |
| Trav12-4         | 0 NA | NA | NA | NA | NA |
| Trav12d-1        | 0 NA | NA | NA | NA | NA |
| Trav12d-2        | 0 NA | NA | NA | NA | NA |
| Trav12d-3        | 0 NA | NA | NA | NA | NA |
| Trav12n-1        | 0 NA | NA | NA | NA | NA |
| Trav12n-2        | 0 NA | NA | NA | NA | NA |
| Trav12n-3        | 0 NA | NA | NA | NA | NA |
| Trav13-2         | 0 NA | NA | NA | NA | NA |
| Trav13-3         | 0 NA | NA | NA | NA | NA |
| Trav13-5         | 0 NA | NA | NA | NA | NA |
| Trav13d-1        | 0 NA | NA | NA | NA | NA |
| Trav13d-3        | 0 NA | NA | NA | NA | NA |
| Trav13d-4        | 0 NA | NA | NA | NA | NA |
| Trav13n-3        | 0 NA | NA | NA | NA | NA |
| Trav14-3         | 0 NA | NA | NA | NA | NA |
| Trav14d-2        | 0 NA | NA | NA | NA | NA |
| Trav14n-2        | 0 NA | NA | NA | NA | NA |
| Trav15-2-dv6-2   | 0 NA | NA | NA | NA | NA |
| Trav15-3         | 0 NA | NA | NA | NA | NA |
| Trav15d-2-dv6d-2 | 0 NA | NA | NA | NA | NA |
| Trav15d-3        | 0 NA | NA | NA | NA | NA |
| Trav15n-1        | 0 NA | NA | NA | NA | NA |
| Trav15n-2        | 0 NA | NA | NA | NA | NA |
| Trav16d-dv11     | 0 NA | NA | NA | NA | NA |
| Trav17           | 0 NA | NA | NA | NA | NA |
| Trav18           | 0 NA | NA | NA | NA | NA |
| Trav19           | 0 NA | NA | NA | NA | NA |
| Trav2            | 0 NA | NA | NA | NA | NA |
| Trav20           | 0 NA | NA | NA | NA | NA |
| Trav22           | 0 NA | NA | NA | NA | NA |
| Trav23           | 0 NA | NA | NA | NA | NA |
| Trav3-2          | 0 NA | NA | NA | NA | NA |
| Trav3-4          | 0 NA | NA | NA | NA | NA |
| Trav3d-2         | 0 NA | NA | NA | NA | NA |
| Trav3n-2         | 0 NA | NA | NA | NA | NA |
| Trav4-1          | 0 NA | NA | NA | NA | NA |
| Trav4-2          | 0 NA | NA | NA | NA | NA |
| Trav4d-2         | 0 NA | NA | NA | NA | NA |
| Trav4d-3         | 0 NA | NA | NA | NA | NA |
| Trav4d-4         | 0 NA | NA | NA | NA | NA |
| Trav4n-3         | 0 NA | NA | NA | NA | NA |
| Trav4n-4         | 0 NA | NA | NA | NA | NA |
| Trav5-1          | 0 NA | NA | NA | NA | NA |
| Trav5-2          | 0 NA | NA | NA | NA | NA |
| Trav5-4          | 0 NA | NA | NA | NA | NA |
| Trav5d-2         | 0 NA | NA | NA | NA | NA |
| Trav5d-3         | 0 NA | NA | NA | NA | NA |
| Trav5d-4         | 0 NA | NA | NA | NA | NA |
| Trav5n-2         | 0 NA | NA | NA | NA | NA |
| Trav5n-3         | 0 NA | NA | NA | NA | NA |

|             |      |    |    |    |    |
|-------------|------|----|----|----|----|
| Trav5n-4    | 0 NA | NA | NA | NA | NA |
| Trav6-1     | 0 NA | NA | NA | NA | NA |
| Trav6-2     | 0 NA | NA | NA | NA | NA |
| Trav6d-5    | 0 NA | NA | NA | NA | NA |
| Trav6d-7    | 0 NA | NA | NA | NA | NA |
| Trav6n-5    | 0 NA | NA | NA | NA | NA |
| Trav6n-6    | 0 NA | NA | NA | NA | NA |
| Trav6n-7    | 0 NA | NA | NA | NA | NA |
| Trav7-1     | 0 NA | NA | NA | NA | NA |
| Trav7-2     | 0 NA | NA | NA | NA | NA |
| Trav7-3     | 0 NA | NA | NA | NA | NA |
| Trav7-4     | 0 NA | NA | NA | NA | NA |
| Trav7-6     | 0 NA | NA | NA | NA | NA |
| Trav7d-2    | 0 NA | NA | NA | NA | NA |
| Trav7d-3    | 0 NA | NA | NA | NA | NA |
| Trav7d-4    | 0 NA | NA | NA | NA | NA |
| Trav7d-5    | 0 NA | NA | NA | NA | NA |
| Trav7n-4    | 0 NA | NA | NA | NA | NA |
| Trav7n-5    | 0 NA | NA | NA | NA | NA |
| Trav7n-6    | 0 NA | NA | NA | NA | NA |
| Trav8d-1    | 0 NA | NA | NA | NA | NA |
| Trav8d-2    | 0 NA | NA | NA | NA | NA |
| Trav8n-2    | 0 NA | NA | NA | NA | NA |
| Trav9d-1    | 0 NA | NA | NA | NA | NA |
| Trav9d-2    | 0 NA | NA | NA | NA | NA |
| Trav9d-3    | 0 NA | NA | NA | NA | NA |
| Trav9d-4    | 0 NA | NA | NA | NA | NA |
| Trav9n-1    | 0 NA | NA | NA | NA | NA |
| Trav9n-2    | 0 NA | NA | NA | NA | NA |
| Trav9n-3    | 0 NA | NA | NA | NA | NA |
| Trav9n-4    | 0 NA | NA | NA | NA | NA |
| Trbd1       | 0 NA | NA | NA | NA | NA |
| Trbd2       | 0 NA | NA | NA | NA | NA |
| Trbj2-7     | 0 NA | NA | NA | NA | NA |
| Trbv10      | 0 NA | NA | NA | NA | NA |
| Trbv11      | 0 NA | NA | NA | NA | NA |
| Trbv12-3    | 0 NA | NA | NA | NA | NA |
| Trbv18      | 0 NA | NA | NA | NA | NA |
| Trbv21      | 0 NA | NA | NA | NA | NA |
| Trbv22      | 0 NA | NA | NA | NA | NA |
| Trbv23      | 0 NA | NA | NA | NA | NA |
| Trbv24      | 0 NA | NA | NA | NA | NA |
| Trbv25      | 0 NA | NA | NA | NA | NA |
| Trbv27      | 0 NA | NA | NA | NA | NA |
| Trbv28      | 0 NA | NA | NA | NA | NA |
| Trbv30      | 0 NA | NA | NA | NA | NA |
| Trbv6       | 0 NA | NA | NA | NA | NA |
| Trbv7       | 0 NA | NA | NA | NA | NA |
| Trbv8       | 0 NA | NA | NA | NA | NA |
| Trbv9       | 0 NA | NA | NA | NA | NA |
| Trcg1       | 0 NA | NA | NA | NA | NA |
| Trdd1       | 0 NA | NA | NA | NA | NA |
| Trdd2       | 0 NA | NA | NA | NA | NA |
| Trdv1       | 0 NA | NA | NA | NA | NA |
| Trdv2-1     | 0 NA | NA | NA | NA | NA |
| Trdv2-2     | 0 NA | NA | NA | NA | NA |
| Trdv3       | 0 NA | NA | NA | NA | NA |
| Trdv5       | 0 NA | NA | NA | NA | NA |
| Trgj3       | 0 NA | NA | NA | NA | NA |
| Trgj4       | 0 NA | NA | NA | NA | NA |
| Trgv1       | 0 NA | NA | NA | NA | NA |
| Trgv7       | 0 NA | NA | NA | NA | NA |
| Trhr2       | 0 NA | NA | NA | NA | NA |
| Trim30e-ps1 | 0 NA | NA | NA | NA | NA |
| Trim42      | 0 NA | NA | NA | NA | NA |
| Trim58      | 0 NA | NA | NA | NA | NA |

|             |      |    |    |    |    |
|-------------|------|----|----|----|----|
| Trim75      | 0 NA | NA | NA | NA | NA |
| Trmt112-ps1 | 0 NA | NA | NA | NA | NA |
| Trp53-ps    | 0 NA | NA | NA | NA | NA |
| Trp53tg5    | 0 NA | NA | NA | NA | NA |
| Trpa1       | 0 NA | NA | NA | NA | NA |
| Trpc5       | 0 NA | NA | NA | NA | NA |
| Trpd52l3    | 0 NA | NA | NA | NA | NA |
| Trpv6       | 0 NA | NA | NA | NA | NA |
| Try10       | 0 NA | NA | NA | NA | NA |
| Tsga8       | 0 NA | NA | NA | NA | NA |
| Tspy-ps     | 0 NA | NA | NA | NA | NA |
| Tspyl-ps    | 0 NA | NA | NA | NA | NA |
| Tssk5       | 0 NA | NA | NA | NA | NA |
| Ttc23l      | 0 NA | NA | NA | NA | NA |
| Ttc29       | 0 NA | NA | NA | NA | NA |
| Ttc9b       | 0 NA | NA | NA | NA | NA |
| Tuba3a      | 0 NA | NA | NA | NA | NA |
| Tuba3b      | 0 NA | NA | NA | NA | NA |
| Txn-ps1     | 0 NA | NA | NA | NA | NA |
| Txndc8      | 0 NA | NA | NA | NA | NA |
| Tyrp1       | 0 NA | NA | NA | NA | NA |
| Uba1y-ps2   | 0 NA | NA | NA | NA | NA |
| Ube2d2b     | 0 NA | NA | NA | NA | NA |
| Ube2d4      | 0 NA | NA | NA | NA | NA |
| Ube2dnl1    | 0 NA | NA | NA | NA | NA |
| Ube2dnl2    | 0 NA | NA | NA | NA | NA |
| Ube2l3-ps1  | 0 NA | NA | NA | NA | NA |
| Ubl4b       | 0 NA | NA | NA | NA | NA |
| Ubqln3      | 0 NA | NA | NA | NA | NA |
| Ubqln5      | 0 NA | NA | NA | NA | NA |
| Ubqlnl      | 0 NA | NA | NA | NA | NA |
| Ucma        | 0 NA | NA | NA | NA | NA |
| Ucn         | 0 NA | NA | NA | NA | NA |
| Ucn3        | 0 NA | NA | NA | NA | NA |
| Ugt1a8      | 0 NA | NA | NA | NA | NA |
| Ugt2a1      | 0 NA | NA | NA | NA | NA |
| Umod        | 0 NA | NA | NA | NA | NA |
| Umpk-ps     | 0 NA | NA | NA | NA | NA |
| Upk2        | 0 NA | NA | NA | NA | NA |
| Upk3a       | 0 NA | NA | NA | NA | NA |
| Upk3bl      | 0 NA | NA | NA | NA | NA |
| Uqcrh-ps2   | 0 NA | NA | NA | NA | NA |
| Usf2-ps1    | 0 NA | NA | NA | NA | NA |
| Usp17le     | 0 NA | NA | NA | NA | NA |
| Usp17le-ps  | 0 NA | NA | NA | NA | NA |
| Usp26       | 0 NA | NA | NA | NA | NA |
| Usp9y       | 0 NA | NA | NA | NA | NA |
| Uts2r       | 0 NA | NA | NA | NA | NA |
| V1ra8       | 0 NA | NA | NA | NA | NA |
| V1rd19      | 0 NA | NA | NA | NA | NA |
| V1rg10      | 0 NA | NA | NA | NA | NA |
| Vamp7-ps    | 0 NA | NA | NA | NA | NA |
| Vgl1        | 0 NA | NA | NA | NA | NA |
| Vgl2        | 0 NA | NA | NA | NA | NA |
| Vhl-ps1     | 0 NA | NA | NA | NA | NA |
| Vma21-ps    | 0 NA | NA | NA | NA | NA |
| Vmn1r-ps1   | 0 NA | NA | NA | NA | NA |
| Vmn1r-ps10  | 0 NA | NA | NA | NA | NA |
| Vmn1r-ps100 | 0 NA | NA | NA | NA | NA |
| Vmn1r-ps101 | 0 NA | NA | NA | NA | NA |
| Vmn1r-ps102 | 0 NA | NA | NA | NA | NA |
| Vmn1r-ps103 | 0 NA | NA | NA | NA | NA |
| Vmn1r-ps104 | 0 NA | NA | NA | NA | NA |
| Vmn1r-ps106 | 0 NA | NA | NA | NA | NA |
| Vmn1r-ps108 | 0 NA | NA | NA | NA | NA |
| Vmn1r-ps109 | 0 NA | NA | NA | NA | NA |

|             |      |    |    |    |    |
|-------------|------|----|----|----|----|
| Vmn1r-ps11  | 0 NA | NA | NA | NA | NA |
| Vmn1r-ps110 | 0 NA | NA | NA | NA | NA |
| Vmn1r-ps111 | 0 NA | NA | NA | NA | NA |
| Vmn1r-ps112 | 0 NA | NA | NA | NA | NA |
| Vmn1r-ps113 | 0 NA | NA | NA | NA | NA |
| Vmn1r-ps114 | 0 NA | NA | NA | NA | NA |
| Vmn1r-ps116 | 0 NA | NA | NA | NA | NA |
| Vmn1r-ps117 | 0 NA | NA | NA | NA | NA |
| Vmn1r-ps12  | 0 NA | NA | NA | NA | NA |
| Vmn1r-ps120 | 0 NA | NA | NA | NA | NA |
| Vmn1r-ps123 | 0 NA | NA | NA | NA | NA |
| Vmn1r-ps125 | 0 NA | NA | NA | NA | NA |
| Vmn1r-ps126 | 0 NA | NA | NA | NA | NA |
| Vmn1r-ps127 | 0 NA | NA | NA | NA | NA |
| Vmn1r-ps13  | 0 NA | NA | NA | NA | NA |
| Vmn1r-ps131 | 0 NA | NA | NA | NA | NA |
| Vmn1r-ps132 | 0 NA | NA | NA | NA | NA |
| Vmn1r-ps133 | 0 NA | NA | NA | NA | NA |
| Vmn1r-ps136 | 0 NA | NA | NA | NA | NA |
| Vmn1r-ps137 | 0 NA | NA | NA | NA | NA |
| Vmn1r-ps14  | 0 NA | NA | NA | NA | NA |
| Vmn1r-ps141 | 0 NA | NA | NA | NA | NA |
| Vmn1r-ps142 | 0 NA | NA | NA | NA | NA |
| Vmn1r-ps143 | 0 NA | NA | NA | NA | NA |
| Vmn1r-ps144 | 0 NA | NA | NA | NA | NA |
| Vmn1r-ps145 | 0 NA | NA | NA | NA | NA |
| Vmn1r-ps146 | 0 NA | NA | NA | NA | NA |
| Vmn1r-ps147 | 0 NA | NA | NA | NA | NA |
| Vmn1r-ps148 | 0 NA | NA | NA | NA | NA |
| Vmn1r-ps149 | 0 NA | NA | NA | NA | NA |
| Vmn1r-ps15  | 0 NA | NA | NA | NA | NA |
| Vmn1r-ps150 | 0 NA | NA | NA | NA | NA |
| Vmn1r-ps152 | 0 NA | NA | NA | NA | NA |
| Vmn1r-ps16  | 0 NA | NA | NA | NA | NA |
| Vmn1r-ps17  | 0 NA | NA | NA | NA | NA |
| Vmn1r-ps18  | 0 NA | NA | NA | NA | NA |
| Vmn1r-ps19  | 0 NA | NA | NA | NA | NA |
| Vmn1r-ps2   | 0 NA | NA | NA | NA | NA |
| Vmn1r-ps20  | 0 NA | NA | NA | NA | NA |
| Vmn1r-ps21  | 0 NA | NA | NA | NA | NA |
| Vmn1r-ps22  | 0 NA | NA | NA | NA | NA |
| Vmn1r-ps23  | 0 NA | NA | NA | NA | NA |
| Vmn1r-ps24  | 0 NA | NA | NA | NA | NA |
| Vmn1r-ps25  | 0 NA | NA | NA | NA | NA |
| Vmn1r-ps26  | 0 NA | NA | NA | NA | NA |
| Vmn1r-ps27  | 0 NA | NA | NA | NA | NA |
| Vmn1r-ps28  | 0 NA | NA | NA | NA | NA |
| Vmn1r-ps29  | 0 NA | NA | NA | NA | NA |
| Vmn1r-ps3   | 0 NA | NA | NA | NA | NA |
| Vmn1r-ps31  | 0 NA | NA | NA | NA | NA |
| Vmn1r-ps32  | 0 NA | NA | NA | NA | NA |
| Vmn1r-ps34  | 0 NA | NA | NA | NA | NA |
| Vmn1r-ps40  | 0 NA | NA | NA | NA | NA |
| Vmn1r-ps45  | 0 NA | NA | NA | NA | NA |
| Vmn1r-ps46  | 0 NA | NA | NA | NA | NA |
| Vmn1r-ps47  | 0 NA | NA | NA | NA | NA |
| Vmn1r-ps48  | 0 NA | NA | NA | NA | NA |
| Vmn1r-ps49  | 0 NA | NA | NA | NA | NA |
| Vmn1r-ps50  | 0 NA | NA | NA | NA | NA |
| Vmn1r-ps51  | 0 NA | NA | NA | NA | NA |
| Vmn1r-ps52  | 0 NA | NA | NA | NA | NA |
| Vmn1r-ps53  | 0 NA | NA | NA | NA | NA |
| Vmn1r-ps55  | 0 NA | NA | NA | NA | NA |
| Vmn1r-ps56  | 0 NA | NA | NA | NA | NA |
| Vmn1r-ps57  | 0 NA | NA | NA | NA | NA |
| Vmn1r-ps58  | 0 NA | NA | NA | NA | NA |



|            |      |    |    |    |    |
|------------|------|----|----|----|----|
| Vmn1r-ps59 | 0 NA | NA | NA | NA | NA |
| Vmn1r-ps6  | 0 NA | NA | NA | NA | NA |
| Vmn1r-ps60 | 0 NA | NA | NA | NA | NA |
| Vmn1r-ps61 | 0 NA | NA | NA | NA | NA |
| Vmn1r-ps63 | 0 NA | NA | NA | NA | NA |
| Vmn1r-ps64 | 0 NA | NA | NA | NA | NA |
| Vmn1r-ps65 | 0 NA | NA | NA | NA | NA |
| Vmn1r-ps66 | 0 NA | NA | NA | NA | NA |
| Vmn1r-ps67 | 0 NA | NA | NA | NA | NA |
| Vmn1r-ps68 | 0 NA | NA | NA | NA | NA |
| Vmn1r-ps69 | 0 NA | NA | NA | NA | NA |
| Vmn1r-ps7  | 0 NA | NA | NA | NA | NA |
| Vmn1r-ps70 | 0 NA | NA | NA | NA | NA |
| Vmn1r-ps71 | 0 NA | NA | NA | NA | NA |
| Vmn1r-ps74 | 0 NA | NA | NA | NA | NA |
| Vmn1r-ps75 | 0 NA | NA | NA | NA | NA |
| Vmn1r-ps76 | 0 NA | NA | NA | NA | NA |
| Vmn1r-ps77 | 0 NA | NA | NA | NA | NA |
| Vmn1r-ps78 | 0 NA | NA | NA | NA | NA |
| Vmn1r-ps79 | 0 NA | NA | NA | NA | NA |
| Vmn1r-ps8  | 0 NA | NA | NA | NA | NA |
| Vmn1r-ps80 | 0 NA | NA | NA | NA | NA |
| Vmn1r-ps83 | 0 NA | NA | NA | NA | NA |
| Vmn1r-ps84 | 0 NA | NA | NA | NA | NA |
| Vmn1r-ps85 | 0 NA | NA | NA | NA | NA |
| Vmn1r-ps86 | 0 NA | NA | NA | NA | NA |
| Vmn1r-ps9  | 0 NA | NA | NA | NA | NA |
| Vmn1r-ps92 | 0 NA | NA | NA | NA | NA |
| Vmn1r-ps93 | 0 NA | NA | NA | NA | NA |
| Vmn1r-ps94 | 0 NA | NA | NA | NA | NA |
| Vmn1r-ps95 | 0 NA | NA | NA | NA | NA |
| Vmn1r-ps96 | 0 NA | NA | NA | NA | NA |
| Vmn1r-ps97 | 0 NA | NA | NA | NA | NA |
| Vmn1r-ps99 | 0 NA | NA | NA | NA | NA |
| Vmn1r10    | 0 NA | NA | NA | NA | NA |
| Vmn1r100   | 0 NA | NA | NA | NA | NA |
| Vmn1r101   | 0 NA | NA | NA | NA | NA |
| Vmn1r103   | 0 NA | NA | NA | NA | NA |
| Vmn1r104   | 0 NA | NA | NA | NA | NA |
| Vmn1r107   | 0 NA | NA | NA | NA | NA |
| Vmn1r11    | 0 NA | NA | NA | NA | NA |
| Vmn1r111   | 0 NA | NA | NA | NA | NA |
| Vmn1r112   | 0 NA | NA | NA | NA | NA |
| Vmn1r113   | 0 NA | NA | NA | NA | NA |
| Vmn1r114   | 0 NA | NA | NA | NA | NA |
| Vmn1r115   | 0 NA | NA | NA | NA | NA |
| Vmn1r116   | 0 NA | NA | NA | NA | NA |
| Vmn1r117   | 0 NA | NA | NA | NA | NA |
| Vmn1r118   | 0 NA | NA | NA | NA | NA |
| Vmn1r119   | 0 NA | NA | NA | NA | NA |
| Vmn1r120   | 0 NA | NA | NA | NA | NA |
| Vmn1r121   | 0 NA | NA | NA | NA | NA |
| Vmn1r122   | 0 NA | NA | NA | NA | NA |
| Vmn1r123   | 0 NA | NA | NA | NA | NA |
| Vmn1r124   | 0 NA | NA | NA | NA | NA |
| Vmn1r125   | 0 NA | NA | NA | NA | NA |
| Vmn1r126   | 0 NA | NA | NA | NA | NA |
| Vmn1r127   | 0 NA | NA | NA | NA | NA |
| Vmn1r128   | 0 NA | NA | NA | NA | NA |
| Vmn1r129   | 0 NA | NA | NA | NA | NA |
| Vmn1r130   | 0 NA | NA | NA | NA | NA |
| Vmn1r131   | 0 NA | NA | NA | NA | NA |
| Vmn1r132   | 0 NA | NA | NA | NA | NA |
| Vmn1r135   | 0 NA | NA | NA | NA | NA |
| Vmn1r137   | 0 NA | NA | NA | NA | NA |
| Vmn1r138   | 0 NA | NA | NA | NA | NA |

|             |      |    |    |    |    |
|-------------|------|----|----|----|----|
| Vmn1r139    | 0 NA | NA | NA | NA | NA |
| Vmn1r142    | 0 NA | NA | NA | NA | NA |
| Vmn1r143    | 0 NA | NA | NA | NA | NA |
| Vmn1r148    | 0 NA | NA | NA | NA | NA |
| Vmn1r149    | 0 NA | NA | NA | NA | NA |
| Vmn1r151    | 0 NA | NA | NA | NA | NA |
| Vmn1r152    | 0 NA | NA | NA | NA | NA |
| Vmn1r155    | 0 NA | NA | NA | NA | NA |
| Vmn1r157    | 0 NA | NA | NA | NA | NA |
| Vmn1r158    | 0 NA | NA | NA | NA | NA |
| Vmn1r159    | 0 NA | NA | NA | NA | NA |
| Vmn1r160    | 0 NA | NA | NA | NA | NA |
| Vmn1r163    | 0 NA | NA | NA | NA | NA |
| Vmn1r165    | 0 NA | NA | NA | NA | NA |
| Vmn1r166    | 0 NA | NA | NA | NA | NA |
| Vmn1r167    | 0 NA | NA | NA | NA | NA |
| Vmn1r168    | 0 NA | NA | NA | NA | NA |
| Vmn1r170    | 0 NA | NA | NA | NA | NA |
| Vmn1r176    | 0 NA | NA | NA | NA | NA |
| Vmn1r177    | 0 NA | NA | NA | NA | NA |
| Vmn1r178    | 0 NA | NA | NA | NA | NA |
| Vmn1r179    | 0 NA | NA | NA | NA | NA |
| Vmn1r183    | 0 NA | NA | NA | NA | NA |
| Vmn1r189    | 0 NA | NA | NA | NA | NA |
| Vmn1r190-ps | 0 NA | NA | NA | NA | NA |
| Vmn1r191    | 0 NA | NA | NA | NA | NA |
| Vmn1r192    | 0 NA | NA | NA | NA | NA |
| Vmn1r194    | 0 NA | NA | NA | NA | NA |
| Vmn1r195    | 0 NA | NA | NA | NA | NA |
| Vmn1r196    | 0 NA | NA | NA | NA | NA |
| Vmn1r2      | 0 NA | NA | NA | NA | NA |
| Vmn1r204    | 0 NA | NA | NA | NA | NA |
| Vmn1r205    | 0 NA | NA | NA | NA | NA |
| Vmn1r207    | 0 NA | NA | NA | NA | NA |
| Vmn1r21     | 0 NA | NA | NA | NA | NA |
| Vmn1r212    | 0 NA | NA | NA | NA | NA |
| Vmn1r221    | 0 NA | NA | NA | NA | NA |
| Vmn1r222    | 0 NA | NA | NA | NA | NA |
| Vmn1r223    | 0 NA | NA | NA | NA | NA |
| Vmn1r224    | 0 NA | NA | NA | NA | NA |
| Vmn1r225    | 0 NA | NA | NA | NA | NA |
| Vmn1r226    | 0 NA | NA | NA | NA | NA |
| Vmn1r228    | 0 NA | NA | NA | NA | NA |
| Vmn1r229    | 0 NA | NA | NA | NA | NA |
| Vmn1r23     | 0 NA | NA | NA | NA | NA |
| Vmn1r230    | 0 NA | NA | NA | NA | NA |
| Vmn1r231    | 0 NA | NA | NA | NA | NA |
| Vmn1r232    | 0 NA | NA | NA | NA | NA |
| Vmn1r233    | 0 NA | NA | NA | NA | NA |
| Vmn1r234    | 0 NA | NA | NA | NA | NA |
| Vmn1r235    | 0 NA | NA | NA | NA | NA |
| Vmn1r236    | 0 NA | NA | NA | NA | NA |
| Vmn1r237    | 0 NA | NA | NA | NA | NA |
| Vmn1r238    | 0 NA | NA | NA | NA | NA |
| Vmn1r239-ps | 0 NA | NA | NA | NA | NA |
| Vmn1r240    | 0 NA | NA | NA | NA | NA |
| Vmn1r241    | 0 NA | NA | NA | NA | NA |
| Vmn1r242    | 0 NA | NA | NA | NA | NA |
| Vmn1r243    | 0 NA | NA | NA | NA | NA |
| Vmn1r244    | 0 NA | NA | NA | NA | NA |
| Vmn1r245    | 0 NA | NA | NA | NA | NA |
| Vmn1r246    | 0 NA | NA | NA | NA | NA |
| Vmn1r247    | 0 NA | NA | NA | NA | NA |
| Vmn1r248    | 0 NA | NA | NA | NA | NA |
| Vmn1r249    | 0 NA | NA | NA | NA | NA |
| Vmn1r25     | 0 NA | NA | NA | NA | NA |

|             |      |    |    |    |    |
|-------------|------|----|----|----|----|
| Vmn1r250    | 0 NA | NA | NA | NA | NA |
| Vmn1r251    | 0 NA | NA | NA | NA | NA |
| Vmn1r252    | 0 NA | NA | NA | NA | NA |
| Vmn1r253    | 0 NA | NA | NA | NA | NA |
| Vmn1r254    | 0 NA | NA | NA | NA | NA |
| Vmn1r255    | 0 NA | NA | NA | NA | NA |
| Vmn1r256    | 0 NA | NA | NA | NA | NA |
| Vmn1r257    | 0 NA | NA | NA | NA | NA |
| Vmn1r258    | 0 NA | NA | NA | NA | NA |
| Vmn1r259    | 0 NA | NA | NA | NA | NA |
| Vmn1r260    | 0 NA | NA | NA | NA | NA |
| Vmn1r31     | 0 NA | NA | NA | NA | NA |
| Vmn1r32     | 0 NA | NA | NA | NA | NA |
| Vmn1r35     | 0 NA | NA | NA | NA | NA |
| Vmn1r36     | 0 NA | NA | NA | NA | NA |
| Vmn1r37     | 0 NA | NA | NA | NA | NA |
| Vmn1r41     | 0 NA | NA | NA | NA | NA |
| Vmn1r44     | 0 NA | NA | NA | NA | NA |
| Vmn1r45     | 0 NA | NA | NA | NA | NA |
| Vmn1r48     | 0 NA | NA | NA | NA | NA |
| Vmn1r52     | 0 NA | NA | NA | NA | NA |
| Vmn1r55     | 0 NA | NA | NA | NA | NA |
| Vmn1r56     | 0 NA | NA | NA | NA | NA |
| Vmn1r59     | 0 NA | NA | NA | NA | NA |
| Vmn1r60     | 0 NA | NA | NA | NA | NA |
| Vmn1r62     | 0 NA | NA | NA | NA | NA |
| Vmn1r63     | 0 NA | NA | NA | NA | NA |
| Vmn1r64     | 0 NA | NA | NA | NA | NA |
| Vmn1r68     | 0 NA | NA | NA | NA | NA |
| Vmn1r69     | 0 NA | NA | NA | NA | NA |
| Vmn1r7      | 0 NA | NA | NA | NA | NA |
| Vmn1r8      | 0 NA | NA | NA | NA | NA |
| Vmn1r85     | 0 NA | NA | NA | NA | NA |
| Vmn1r88     | 0 NA | NA | NA | NA | NA |
| Vmn1r91     | 0 NA | NA | NA | NA | NA |
| Vmn1r93     | 0 NA | NA | NA | NA | NA |
| Vmn1r94     | 0 NA | NA | NA | NA | NA |
| Vmn1r95     | 0 NA | NA | NA | NA | NA |
| Vmn2r-ps10  | 0 NA | NA | NA | NA | NA |
| Vmn2r-ps100 | 0 NA | NA | NA | NA | NA |
| Vmn2r-ps103 | 0 NA | NA | NA | NA | NA |
| Vmn2r-ps104 | 0 NA | NA | NA | NA | NA |
| Vmn2r-ps105 | 0 NA | NA | NA | NA | NA |
| Vmn2r-ps106 | 0 NA | NA | NA | NA | NA |
| Vmn2r-ps108 | 0 NA | NA | NA | NA | NA |
| Vmn2r-ps109 | 0 NA | NA | NA | NA | NA |
| Vmn2r-ps11  | 0 NA | NA | NA | NA | NA |
| Vmn2r-ps111 | 0 NA | NA | NA | NA | NA |
| Vmn2r-ps116 | 0 NA | NA | NA | NA | NA |
| Vmn2r-ps117 | 0 NA | NA | NA | NA | NA |
| Vmn2r-ps118 | 0 NA | NA | NA | NA | NA |
| Vmn2r-ps119 | 0 NA | NA | NA | NA | NA |
| Vmn2r-ps12  | 0 NA | NA | NA | NA | NA |
| Vmn2r-ps120 | 0 NA | NA | NA | NA | NA |
| Vmn2r-ps121 | 0 NA | NA | NA | NA | NA |
| Vmn2r-ps122 | 0 NA | NA | NA | NA | NA |
| Vmn2r-ps123 | 0 NA | NA | NA | NA | NA |
| Vmn2r-ps124 | 0 NA | NA | NA | NA | NA |
| Vmn2r-ps125 | 0 NA | NA | NA | NA | NA |
| Vmn2r-ps126 | 0 NA | NA | NA | NA | NA |
| Vmn2r-ps127 | 0 NA | NA | NA | NA | NA |
| Vmn2r-ps128 | 0 NA | NA | NA | NA | NA |
| Vmn2r-ps129 | 0 NA | NA | NA | NA | NA |
| Vmn2r-ps13  | 0 NA | NA | NA | NA | NA |
| Vmn2r-ps130 | 0 NA | NA | NA | NA | NA |
| Vmn2r-ps131 | 0 NA | NA | NA | NA | NA |

|             |      |    |    |    |    |
|-------------|------|----|----|----|----|
| Vmn2r-ps132 | 0 NA | NA | NA | NA | NA |
| Vmn2r-ps133 | 0 NA | NA | NA | NA | NA |
| Vmn2r-ps134 | 0 NA | NA | NA | NA | NA |
| Vmn2r-ps139 | 0 NA | NA | NA | NA | NA |
| Vmn2r-ps149 | 0 NA | NA | NA | NA | NA |
| Vmn2r-ps15  | 0 NA | NA | NA | NA | NA |
| Vmn2r-ps159 | 0 NA | NA | NA | NA | NA |
| Vmn2r-ps16  | 0 NA | NA | NA | NA | NA |
| Vmn2r-ps17  | 0 NA | NA | NA | NA | NA |
| Vmn2r-ps18  | 0 NA | NA | NA | NA | NA |
| Vmn2r-ps19  | 0 NA | NA | NA | NA | NA |
| Vmn2r-ps2   | 0 NA | NA | NA | NA | NA |
| Vmn2r-ps20  | 0 NA | NA | NA | NA | NA |
| Vmn2r-ps21  | 0 NA | NA | NA | NA | NA |
| Vmn2r-ps23  | 0 NA | NA | NA | NA | NA |
| Vmn2r-ps24  | 0 NA | NA | NA | NA | NA |
| Vmn2r-ps25  | 0 NA | NA | NA | NA | NA |
| Vmn2r-ps26  | 0 NA | NA | NA | NA | NA |
| Vmn2r-ps3   | 0 NA | NA | NA | NA | NA |
| Vmn2r-ps31  | 0 NA | NA | NA | NA | NA |
| Vmn2r-ps32  | 0 NA | NA | NA | NA | NA |
| Vmn2r-ps33  | 0 NA | NA | NA | NA | NA |
| Vmn2r-ps34  | 0 NA | NA | NA | NA | NA |
| Vmn2r-ps35  | 0 NA | NA | NA | NA | NA |
| Vmn2r-ps36  | 0 NA | NA | NA | NA | NA |
| Vmn2r-ps37  | 0 NA | NA | NA | NA | NA |
| Vmn2r-ps38  | 0 NA | NA | NA | NA | NA |
| Vmn2r-ps4   | 0 NA | NA | NA | NA | NA |
| Vmn2r-ps40  | 0 NA | NA | NA | NA | NA |
| Vmn2r-ps42  | 0 NA | NA | NA | NA | NA |
| Vmn2r-ps43  | 0 NA | NA | NA | NA | NA |
| Vmn2r-ps44  | 0 NA | NA | NA | NA | NA |
| Vmn2r-ps45  | 0 NA | NA | NA | NA | NA |
| Vmn2r-ps46  | 0 NA | NA | NA | NA | NA |
| Vmn2r-ps47  | 0 NA | NA | NA | NA | NA |
| Vmn2r-ps49  | 0 NA | NA | NA | NA | NA |
| Vmn2r-ps5   | 0 NA | NA | NA | NA | NA |
| Vmn2r-ps51  | 0 NA | NA | NA | NA | NA |
| Vmn2r-ps52  | 0 NA | NA | NA | NA | NA |
| Vmn2r-ps53  | 0 NA | NA | NA | NA | NA |
| Vmn2r-ps55  | 0 NA | NA | NA | NA | NA |
| Vmn2r-ps56  | 0 NA | NA | NA | NA | NA |
| Vmn2r-ps57  | 0 NA | NA | NA | NA | NA |
| Vmn2r-ps58  | 0 NA | NA | NA | NA | NA |
| Vmn2r-ps59  | 0 NA | NA | NA | NA | NA |
| Vmn2r-ps6   | 0 NA | NA | NA | NA | NA |
| Vmn2r-ps60  | 0 NA | NA | NA | NA | NA |
| Vmn2r-ps61  | 0 NA | NA | NA | NA | NA |
| Vmn2r-ps62  | 0 NA | NA | NA | NA | NA |
| Vmn2r-ps64  | 0 NA | NA | NA | NA | NA |
| Vmn2r-ps65  | 0 NA | NA | NA | NA | NA |
| Vmn2r-ps66  | 0 NA | NA | NA | NA | NA |
| Vmn2r-ps67  | 0 NA | NA | NA | NA | NA |
| Vmn2r-ps68  | 0 NA | NA | NA | NA | NA |
| Vmn2r-ps69  | 0 NA | NA | NA | NA | NA |
| Vmn2r-ps7   | 0 NA | NA | NA | NA | NA |
| Vmn2r-ps70  | 0 NA | NA | NA | NA | NA |
| Vmn2r-ps72  | 0 NA | NA | NA | NA | NA |
| Vmn2r-ps73  | 0 NA | NA | NA | NA | NA |
| Vmn2r-ps75  | 0 NA | NA | NA | NA | NA |
| Vmn2r-ps76  | 0 NA | NA | NA | NA | NA |
| Vmn2r-ps77  | 0 NA | NA | NA | NA | NA |
| Vmn2r-ps78  | 0 NA | NA | NA | NA | NA |
| Vmn2r-ps79  | 0 NA | NA | NA | NA | NA |
| Vmn2r-ps8   | 0 NA | NA | NA | NA | NA |
| Vmn2r-ps80  | 0 NA | NA | NA | NA | NA |

|            |      |    |    |    |    |
|------------|------|----|----|----|----|
| Vmn2r-ps81 | 0 NA | NA | NA | NA | NA |
| Vmn2r-ps82 | 0 NA | NA | NA | NA | NA |
| Vmn2r-ps83 | 0 NA | NA | NA | NA | NA |
| Vmn2r-ps84 | 0 NA | NA | NA | NA | NA |
| Vmn2r-ps85 | 0 NA | NA | NA | NA | NA |
| Vmn2r-ps86 | 0 NA | NA | NA | NA | NA |
| Vmn2r-ps87 | 0 NA | NA | NA | NA | NA |
| Vmn2r-ps89 | 0 NA | NA | NA | NA | NA |
| Vmn2r-ps9  | 0 NA | NA | NA | NA | NA |
| Vmn2r-ps91 | 0 NA | NA | NA | NA | NA |
| Vmn2r-ps92 | 0 NA | NA | NA | NA | NA |
| Vmn2r-ps94 | 0 NA | NA | NA | NA | NA |
| Vmn2r-ps95 | 0 NA | NA | NA | NA | NA |
| Vmn2r-ps96 | 0 NA | NA | NA | NA | NA |
| Vmn2r-ps97 | 0 NA | NA | NA | NA | NA |
| Vmn2r-ps98 | 0 NA | NA | NA | NA | NA |
| Vmn2r-ps99 | 0 NA | NA | NA | NA | NA |
| Vmn2r100   | 0 NA | NA | NA | NA | NA |
| Vmn2r101   | 0 NA | NA | NA | NA | NA |
| Vmn2r102   | 0 NA | NA | NA | NA | NA |
| Vmn2r103   | 0 NA | NA | NA | NA | NA |
| Vmn2r104   | 0 NA | NA | NA | NA | NA |
| Vmn2r105   | 0 NA | NA | NA | NA | NA |
| Vmn2r106   | 0 NA | NA | NA | NA | NA |
| Vmn2r107   | 0 NA | NA | NA | NA | NA |
| Vmn2r108   | 0 NA | NA | NA | NA | NA |
| Vmn2r109   | 0 NA | NA | NA | NA | NA |
| Vmn2r11    | 0 NA | NA | NA | NA | NA |
| Vmn2r110   | 0 NA | NA | NA | NA | NA |
| Vmn2r111   | 0 NA | NA | NA | NA | NA |
| Vmn2r112   | 0 NA | NA | NA | NA | NA |
| Vmn2r113   | 0 NA | NA | NA | NA | NA |
| Vmn2r114   | 0 NA | NA | NA | NA | NA |
| Vmn2r115   | 0 NA | NA | NA | NA | NA |
| Vmn2r116   | 0 NA | NA | NA | NA | NA |
| Vmn2r117   | 0 NA | NA | NA | NA | NA |
| Vmn2r118   | 0 NA | NA | NA | NA | NA |
| Vmn2r12    | 0 NA | NA | NA | NA | NA |
| Vmn2r121   | 0 NA | NA | NA | NA | NA |
| Vmn2r122   | 0 NA | NA | NA | NA | NA |
| Vmn2r124   | 0 NA | NA | NA | NA | NA |
| Vmn2r125   | 0 NA | NA | NA | NA | NA |
| Vmn2r126   | 0 NA | NA | NA | NA | NA |
| Vmn2r13    | 0 NA | NA | NA | NA | NA |
| Vmn2r14    | 0 NA | NA | NA | NA | NA |
| Vmn2r16    | 0 NA | NA | NA | NA | NA |
| Vmn2r17    | 0 NA | NA | NA | NA | NA |
| Vmn2r19    | 0 NA | NA | NA | NA | NA |
| Vmn2r2     | 0 NA | NA | NA | NA | NA |
| Vmn2r21    | 0 NA | NA | NA | NA | NA |
| Vmn2r22    | 0 NA | NA | NA | NA | NA |
| Vmn2r23    | 0 NA | NA | NA | NA | NA |
| Vmn2r24    | 0 NA | NA | NA | NA | NA |
| Vmn2r25    | 0 NA | NA | NA | NA | NA |
| Vmn2r27    | 0 NA | NA | NA | NA | NA |
| Vmn2r28    | 0 NA | NA | NA | NA | NA |
| Vmn2r31    | 0 NA | NA | NA | NA | NA |
| Vmn2r32    | 0 NA | NA | NA | NA | NA |
| Vmn2r33    | 0 NA | NA | NA | NA | NA |
| Vmn2r35    | 0 NA | NA | NA | NA | NA |
| Vmn2r36    | 0 NA | NA | NA | NA | NA |
| Vmn2r37    | 0 NA | NA | NA | NA | NA |
| Vmn2r38    | 0 NA | NA | NA | NA | NA |
| Vmn2r39    | 0 NA | NA | NA | NA | NA |
| Vmn2r40    | 0 NA | NA | NA | NA | NA |
| Vmn2r41    | 0 NA | NA | NA | NA | NA |

|         |      |    |    |    |    |
|---------|------|----|----|----|----|
| Vmn2r43 | 0 NA | NA | NA | NA | NA |
| Vmn2r44 | 0 NA | NA | NA | NA | NA |
| Vmn2r45 | 0 NA | NA | NA | NA | NA |
| Vmn2r47 | 0 NA | NA | NA | NA | NA |
| Vmn2r48 | 0 NA | NA | NA | NA | NA |
| Vmn2r49 | 0 NA | NA | NA | NA | NA |
| Vmn2r50 | 0 NA | NA | NA | NA | NA |
| Vmn2r51 | 0 NA | NA | NA | NA | NA |
| Vmn2r52 | 0 NA | NA | NA | NA | NA |
| Vmn2r53 | 0 NA | NA | NA | NA | NA |
| Vmn2r54 | 0 NA | NA | NA | NA | NA |
| Vmn2r56 | 0 NA | NA | NA | NA | NA |
| Vmn2r58 | 0 NA | NA | NA | NA | NA |
| Vmn2r59 | 0 NA | NA | NA | NA | NA |
| Vmn2r60 | 0 NA | NA | NA | NA | NA |
| Vmn2r61 | 0 NA | NA | NA | NA | NA |
| Vmn2r62 | 0 NA | NA | NA | NA | NA |
| Vmn2r63 | 0 NA | NA | NA | NA | NA |
| Vmn2r65 | 0 NA | NA | NA | NA | NA |
| Vmn2r66 | 0 NA | NA | NA | NA | NA |
| Vmn2r67 | 0 NA | NA | NA | NA | NA |
| Vmn2r68 | 0 NA | NA | NA | NA | NA |
| Vmn2r69 | 0 NA | NA | NA | NA | NA |
| Vmn2r70 | 0 NA | NA | NA | NA | NA |
| Vmn2r71 | 0 NA | NA | NA | NA | NA |
| Vmn2r72 | 0 NA | NA | NA | NA | NA |
| Vmn2r73 | 0 NA | NA | NA | NA | NA |
| Vmn2r74 | 0 NA | NA | NA | NA | NA |
| Vmn2r75 | 0 NA | NA | NA | NA | NA |
| Vmn2r76 | 0 NA | NA | NA | NA | NA |
| Vmn2r77 | 0 NA | NA | NA | NA | NA |
| Vmn2r79 | 0 NA | NA | NA | NA | NA |
| Vmn2r8  | 0 NA | NA | NA | NA | NA |
| Vmn2r80 | 0 NA | NA | NA | NA | NA |
| Vmn2r81 | 0 NA | NA | NA | NA | NA |
| Vmn2r82 | 0 NA | NA | NA | NA | NA |
| Vmn2r83 | 0 NA | NA | NA | NA | NA |
| Vmn2r84 | 0 NA | NA | NA | NA | NA |
| Vmn2r85 | 0 NA | NA | NA | NA | NA |
| Vmn2r86 | 0 NA | NA | NA | NA | NA |
| Vmn2r87 | 0 NA | NA | NA | NA | NA |
| Vmn2r89 | 0 NA | NA | NA | NA | NA |
| Vmn2r9  | 0 NA | NA | NA | NA | NA |
| Vmn2r90 | 0 NA | NA | NA | NA | NA |
| Vmn2r91 | 0 NA | NA | NA | NA | NA |
| Vmn2r92 | 0 NA | NA | NA | NA | NA |
| Vmn2r93 | 0 NA | NA | NA | NA | NA |
| Vmn2r94 | 0 NA | NA | NA | NA | NA |
| Vmn2r95 | 0 NA | NA | NA | NA | NA |
| Vmn2r97 | 0 NA | NA | NA | NA | NA |
| Vmn2r98 | 0 NA | NA | NA | NA | NA |
| Vmn2r99 | 0 NA | NA | NA | NA | NA |
| Vpreb2  | 0 NA | NA | NA | NA | NA |
| Vrtn    | 0 NA | NA | NA | NA | NA |
| Vsig1   | 0 NA | NA | NA | NA | NA |
| Vstm2l  | 0 NA | NA | NA | NA | NA |
| Vwc2l   | 0 NA | NA | NA | NA | NA |
| Vwde    | 0 NA | NA | NA | NA | NA |
| Wap     | 0 NA | NA | NA | NA | NA |
| Wfdc10  | 0 NA | NA | NA | NA | NA |
| Wfdc11  | 0 NA | NA | NA | NA | NA |
| Wfdc15a | 0 NA | NA | NA | NA | NA |
| Wfdc5   | 0 NA | NA | NA | NA | NA |
| Wfdc6a  | 0 NA | NA | NA | NA | NA |
| Wfdc6b  | 0 NA | NA | NA | NA | NA |
| Wfdc9   | 0 NA | NA | NA | NA | NA |

|              |             |             |             |             |    |           |           |
|--------------|-------------|-------------|-------------|-------------|----|-----------|-----------|
| Wnt1         | 0 NA        | NA          | NA          | NA          | NA | NA        | NA        |
| Wnt8a        | 0 NA        | NA          | NA          | NA          | NA | NA        | NA        |
| Wnt8b        | 0 NA        | NA          | NA          | NA          | NA | NA        | NA        |
| Wsb2-ps      | 0 NA        | NA          | NA          | NA          | NA | NA        | NA        |
| Xkr7         | 0 NA        | NA          | NA          | NA          | NA | NA        | NA        |
| Xlr3c        | 0 NA        | NA          | NA          | NA          | NA | NA        | NA        |
| Xlr3d-ps     | 0 NA        | NA          | NA          | NA          | NA | NA        | NA        |
| Xlr3e-ps     | 0 NA        | NA          | NA          | NA          | NA | NA        | NA        |
| Xlr4d-ps     | 0 NA        | NA          | NA          | NA          | NA | NA        | NA        |
| Xlr4e-ps     | 0 NA        | NA          | NA          | NA          | NA | NA        | NA        |
| Xlr5a        | 0 NA        | NA          | NA          | NA          | NA | NA        | NA        |
| Xlr5d-ps     | 0 NA        | NA          | NA          | NA          | NA | NA        | NA        |
| Xlr5e-ps     | 0 NA        | NA          | NA          | NA          | NA | NA        | NA        |
| Ybx1-ps2     | 0 NA        | NA          | NA          | NA          | NA | NA        | NA        |
| Ywhaq-ps1    | 0 NA        | NA          | NA          | NA          | NA | NA        | NA        |
| Zar1l        | 0 NA        | NA          | NA          | NA          | NA | NA        | NA        |
| Zbbx         | 0 NA        | NA          | NA          | NA          | NA | NA        | NA        |
| Zbed4-ps3    | 0 NA        | NA          | NA          | NA          | NA | NA        | NA        |
| Zcchc13      | 0 NA        | NA          | NA          | NA          | NA | NA        | NA        |
| Zcchc9-ps    | 0 NA        | NA          | NA          | NA          | NA | NA        | NA        |
| Zdhhc11      | 0 NA        | NA          | NA          | NA          | NA | NA        | NA        |
| Zdhhc25      | 0 NA        | NA          | NA          | NA          | NA | NA        | NA        |
| Zfp264       | 0 NA        | NA          | NA          | NA          | NA | NA        | NA        |
| Zfp419       | 0 NA        | NA          | NA          | NA          | NA | NA        | NA        |
| Zfp42-ps1    | 0 NA        | NA          | NA          | NA          | NA | NA        | NA        |
| Zfp474       | 0 NA        | NA          | NA          | NA          | NA | NA        | NA        |
| Zfp572       | 0 NA        | NA          | NA          | NA          | NA | NA        | NA        |
| Zfp616       | 0 NA        | NA          | NA          | NA          | NA | NA        | NA        |
| Zfp648       | 0 NA        | NA          | NA          | NA          | NA | NA        | NA        |
| Zfp804b      | 0 NA        | NA          | NA          | NA          | NA | NA        | NA        |
| Zfp935       | 0 NA        | NA          | NA          | NA          | NA | NA        | NA        |
| Zfp957       | 0 NA        | NA          | NA          | NA          | NA | NA        | NA        |
| Zfp967       | 0 NA        | NA          | NA          | NA          | NA | NA        | NA        |
| Zfy1         | 0 NA        | NA          | NA          | NA          | NA | NA        | NA        |
| Zfy2         | 0 NA        | NA          | NA          | NA          | NA | NA        | NA        |
| Zic2         | 0 NA        | NA          | NA          | NA          | NA | NA        | NA        |
| Znrf4        | 0 NA        | NA          | NA          | NA          | NA | NA        | NA        |
| Zp2          | 0 NA        | NA          | NA          | NA          | NA | NA        | NA        |
| Zp4-ps       | 0 NA        | NA          | NA          | NA          | NA | NA        | NA        |
| Zpld1        | 0 NA        | NA          | NA          | NA          | NA | NA        | NA        |
| Zpld2        | 0 NA        | NA          | NA          | NA          | NA | NA        | NA        |
| Zscan4b      | 0 NA        | NA          | NA          | NA          | NA | NA        | NA        |
| Zscan5b      | 0 NA        | NA          | NA          | NA          | NA | NA        | NA        |
| Zswim2       | 0 NA        | NA          | NA          | NA          | NA | NA        | NA        |
| Mup19        | 221873.3823 | 20.71180297 | 1.153848044 | 17.95019984 |    | 4.78E-72  | 2.40E-69  |
| Mup15        | 73782.68    | 19.71386396 | 1.561885046 | 12.62184052 |    | 1.60E-36  | 9.28E-35  |
| Mup17        | 68282.31365 | 19.60216319 | 1.544933452 | 12.68803078 |    | 6.89E-37  | 4.04E-35  |
| Mup7         | 461575.8724 | 18.82142712 | 1.144884914 | 16.43957999 |    | 9.96E-61  | 2.50E-58  |
| Mup12        | 9096.35821  | 17.29803385 | 0.980177852 | 17.64785218 |    | 1.06E-69  | 4.29E-67  |
| Hsd3b5       | 2898.34427  | 15.64686739 | 0.92828023  | 16.8557585  |    | 9.52E-64  | 2.90E-61  |
| Elovl3       | 2871.388685 | 14.06069688 | 0.846754779 | 16.60539418 |    | 6.37E-62  | 1.62E-59  |
| Mup14        | 195800.5754 | 13.9591854  | 1.629854941 | 8.564679621 |    | 1.08E-17  | 1.42E-16  |
| Mup1         | 28542.41458 | 13.67582896 | 0.929586716 | 14.71173019 |    | 5.42E-49  | 7.33E-47  |
| Mup9         | 29166.29884 | 13.07876993 | 1.44975605  | 9.021359095 |    | 1.86E-19  | 2.82E-18  |
| Serpina4-ps1 | 4591.420898 | 13.0661294  | 1.016637617 | 12.85229779 |    | 8.35E-38  | 5.27E-36  |
| Mup11        | 150749.9225 | 12.99810176 | 1.300320269 | 9.996077172 |    | 1.59E-23  | 3.34E-22  |
| Mup16        | 28822.92886 | 12.907381   | 3.012610139 | 4.284451158 | NA | NA        | NA        |
| Slco1a1      | 3115.715221 | 12.08593592 | 0.443252802 | 27.26646252 |    | 1.06E-163 | 1.81E-159 |
| Mup18        | 15079.61052 | 12.00825719 | 2.182856646 | 5.501166196 |    | 3.77E-08  | 1.82E-07  |
| Moxd1        | 315.9664947 | 11.90739623 | 2.581930271 | 4.611819446 | NA | NA        | NA        |
| Mup8         | 983.3908349 | 11.79800076 | 1.839541339 | 6.413555655 |    | 1.42E-10  | 9.14E-10  |
| Mup2         | 1204.586254 | 11.69154904 | 2.015622342 | 5.800466089 |    | 6.61E-09  | 3.49E-08  |
| Mup-ps13     | 157.636914  | 11.44325859 | 0.953737344 | 11.99833335 |    | 3.63E-33  | 1.60E-31  |
| Mup-ps16     | 457.9693922 | 11.3921921  | 0.84062779  | 13.5520051  |    | 7.71E-42  | 6.60E-40  |
| Mup22        | 394834.5784 | 11.20384361 | 2.565307242 | 4.367447076 | NA | NA        | NA        |
| Mup13        | 250.7001449 | 10.88654148 | 1.507117247 | 7.223420411 |    | 5.07E-13  | 4.27E-12  |

|               |             |             |             |             |             |             |
|---------------|-------------|-------------|-------------|-------------|-------------|-------------|
| Mup10         | 4873.958926 | 10.74542245 | 2.116154625 | 5.077805905 | 3.82E-07    | 1.62E-06    |
| Mup-ps12      | 93.77021143 | 10.6920869  | 1.021343463 | 10.46864966 | 1.20E-25    | 2.99E-24    |
| Mup5          | 71.63259883 | 10.30282673 | 0.980191827 | 10.51103105 | 7.68E-26    | 1.93E-24    |
| Mup21         | 3187.027899 | 9.69545809  | 1.079242322 | 8.983578473 | 2.62E-19    | 3.94E-18    |
| Mup-ps14      | 39.94680487 | 9.457068489 | 1.072641058 | 8.816619894 | 1.18E-18    | 1.69E-17    |
| Mup-ps8       | 31.99204969 | 9.137029979 | 1.031830193 | 8.855168262 | 8.36E-19    | 1.21E-17    |
| Mup-ps6       | 29.84711849 | 9.036170862 | 1.032746959 | 8.749646547 | 2.14E-18    | 2.99E-17    |
| Ugt2b38       | 330.3933796 | 8.998093812 | 0.538618027 | 16.70589056 | 1.19E-62    | 3.21E-60    |
| Mup-ps7       | 25.88256524 | 8.834880155 | 1.002593983 | 8.812021916 | 1.23E-18    | 1.75E-17    |
| Gtpbp4-ps1    | 25.74721231 | 8.822906036 | 1.030608105 | 8.560873905 | 1.12E-17    | 1.46E-16    |
| Sult2a8       | 6247.405362 | 8.794038523 | 1.039777896 | 8.457612491 | NA          | NA          |
| Ces4a         | 35.62352285 | 8.709047907 | 1.025439646 | 8.49298927  | 2.01E-17    | 2.59E-16    |
| Mup3          | 120908.7155 | 8.590498288 | 1.215058132 | 7.070030695 | NA          | NA          |
| Obox4-ps3     | 20.62830473 | 8.506498404 | 1.036384721 | 8.207857792 | 2.25E-16    | 2.62E-15    |
| Cfd           | 19.64074296 | 8.434057037 | 1.252871806 | 6.731779737 | 1.68E-11    | 1.20E-10    |
| Cyp2c53-ps    | 18.8804315  | 8.372596948 | 1.078970346 | 7.759802649 | 8.51E-15    | 8.54E-14    |
| Trhde         | 17.53714678 | 8.267135183 | 1.069680386 | 7.728603136 | 1.09E-14    | 1.08E-13    |
| Mup-ps5       | 16.74059342 | 8.202968423 | 1.075138121 | 7.629688001 | 2.35E-14    | 2.26E-13    |
| Ces3b         | 9112.617264 | 8.170237079 | 1.305921711 | 6.256299294 | NA          | NA          |
| Mup-ps17      | 16.3416769  | 8.165156425 | 1.093386869 | 7.467765214 | 8.16E-14    | 7.43E-13    |
| Mup-ps1       | 15.86051223 | 8.124984316 | 1.100953297 | 7.379953659 | 1.58E-13    | 1.40E-12    |
| Gm13244       | 13.87295804 | 7.935153476 | 1.086846224 | 7.301082065 | 2.85E-13    | 2.46E-12    |
| Mup-ps19      | 658.5912595 | 7.892726995 | 0.982709646 | 8.031596131 | 9.62E-16    | 1.06E-14    |
| Ces3a         | 26934.86362 | 7.757288054 | 1.268851156 | 6.113631232 | NA          | NA          |
| Mup-ps18      | 11.82496986 | 7.696011557 | 1.130767747 | 6.806005546 | 1.00E-11    | 7.37E-11    |
| Mup-ps15      | 11.50538065 | 7.655407197 | 1.242484841 | 6.161368689 | 7.21E-10    | 4.26E-09    |
| Mup-ps4       | 11.33296247 | 7.636036458 | 1.427035118 | 5.350980056 | 8.75E-08    | 4.04E-07    |
| Fitm1         | 446.7059489 | 7.591950633 | 0.401047166 | 18.93031862 | 6.42E-80    | 6.08E-77    |
| Cyp4a12b      | 2056.414343 | 7.559648189 | 0.379893438 | 19.89939131 | 4.12E-88    | 7.02E-85    |
| Gm45727       | 9.946782587 | 7.466447115 | 1.128668012 | 6.615273079 | 3.71E-11    | 2.54E-10    |
| Lrit2         | 85.38058741 | 7.460666267 | 0.528667442 | 14.11221057 | 3.19E-45    | 3.42E-43    |
| Mup-ps10      | 9.813374947 | 7.428667646 | 1.147301164 | 6.474906397 | 9.49E-11    | 6.22E-10    |
| Gm43158       | 14.63114426 | 7.41576688  | 1.101489938 | 6.732487174 | 1.67E-11    | 1.19E-10    |
| Sic1a2        | 827.3314788 | 7.409491567 | 1.162832366 | 6.371934409 | 1.87E-10    | 1.19E-09    |
| Mup-ps20      | 13.09682919 | 7.253611819 | 1.148831696 | 6.313902935 | 2.72E-10    | 1.69E-09    |
| Sult5a1       | 381.639104  | 7.179697713 | 0.890988901 | 8.058122507 | 7.75E-16    | 8.58E-15    |
| Gm21064       | 8.139958783 | 7.172420252 | 1.158481102 | 6.191227667 | 5.97E-10    | 3.56E-09    |
| Cyp2e1        | 62675.48085 | 7.136849578 | 0.642127964 | 11.1143728  | 1.07E-28    | 3.34E-27    |
| Gm15452       | 7.952389122 | 7.130645167 | 1.196917867 | 5.957505825 | 2.56E-09    | 1.42E-08    |
| Serpina12     | 706.3751266 | 6.966453533 | 0.698144252 | 9.978530246 | 1.89E-23    | 3.96E-22    |
| Sic15a5       | 110.9807423 | 6.962887294 | 0.439083759 | 15.85776551 | 1.24E-56    | 2.52E-54    |
| Csrp3         | 228.3642447 | 6.932881885 | 1.296522006 | 5.347292103 | 8.93E-08    | 4.12E-07    |
| Hhip          | 17.00034492 | 6.919548503 | 1.058416067 | 6.537644996 | 6.25E-11    | 4.19E-10    |
| Gm44478       | 6.864445757 | 6.918964566 | 1.196120953 | 5.784502438 | 7.27E-09    | 3.83E-08    |
| E030018B13Rik | 6.772794629 | 6.90758599  | 1.195196426 | 5.779456701 | 7.49E-09    | 3.94E-08    |
| Prop1         | 9.75398915  | 6.874457252 | 1.088882579 | 6.313313652 | 2.73E-10    | 1.70E-09    |
| Adh6-ps1      | 575.5057199 | 6.829877989 | 0.821032587 | 8.318644226 | 8.90E-17    | 1.07E-15    |
| AL645849.1    | 6.325444657 | 6.810895891 | 3.462889525 | 1.96682448  | 0.049203449 | 0.08321754  |
| Mup-ps21      | 6.339522587 | 6.78958826  | 1.360194305 | 4.991631147 | 5.99E-07    | 2.49E-06    |
| Gm13233       | 9.400986357 | 6.770490804 | 1.107144684 | 6.115271928 | 9.64E-10    | 5.63E-09    |
| Gm3839        | 269.9751049 | 6.609430503 | 0.415695154 | 15.89970543 | 6.37E-57    | 1.32E-54    |
| Ugt1a10       | 41.41630329 | 6.585512321 | 0.652449945 | 10.0935135  | 5.90E-24    | 1.28E-22    |
| Nat8f5        | 198.8974751 | 6.541038718 | 0.377578498 | 17.32365258 | 3.12E-67    | 1.11E-64    |
| Ces1f         | 3822.682099 | 6.521520738 | 1.047734241 | 6.22440356  | NA          | NA          |
| Cyp4a14       | 1444.181182 | 6.519006744 | 1.692517267 | 3.851663359 | 0.000117318 | 0.00035027  |
| Rhbg          | 84.92539942 | 6.484716014 | 1.696606613 | 3.822168301 | 0.000132283 | 0.000391386 |
| Ampd1         | 43.93079319 | 6.473133612 | 0.575463935 | 11.24854785 | 2.35E-29    | 7.78E-28    |
| Capn8         | 63.35294851 | 6.439806807 | 0.681160877 | 9.454164243 | 3.26E-21    | 5.75E-20    |
| Rfx4          | 35.77303498 | 6.414744315 | 0.688714018 | 9.314089955 | 1.23E-20    | 2.06E-19    |
| Gm13169       | 4.810375908 | 6.414522721 | 3.46553334  | 1.850948207 | 0.064177005 | 0.104787815 |
| Cyp7b1        | 3926.767077 | 6.410704208 | 0.35369721  | 18.1248368  | 2.03E-73    | 1.17E-70    |
| Nlrip12       | 495.3725142 | 6.372080393 | 0.457584918 | 13.92545983 | 4.44E-44    | 4.37E-42    |
| Cyp2c67       | 2990.693835 | 6.366979031 | 0.402057186 | 15.83600357 | 1.76E-56    | 3.52E-54    |
| Sp5           | 19.4021492  | 6.271487195 | 0.894751934 | 7.009190992 | 2.40E-12    | 1.88E-11    |
| Serpina9      | 45.85066724 | 6.269397302 | 0.672083464 | 9.328301678 | 1.08E-20    | 1.82E-19    |
| Vmn2r-ps110   | 4.346530383 | 6.26213479  | 1.381443875 | 4.53303598  | 5.81E-06    | 2.12E-05    |



|               |             |             |             |             |             |             |
|---------------|-------------|-------------|-------------|-------------|-------------|-------------|
| Fabp1         | 53385.74946 | 6.22735883  | 0.459314667 | 13.55793595 | 7.11E-42    | 6.12E-40    |
| Thrsp         | 2368.561547 | 6.219437821 | 0.343161871 | 18.12391863 | 2.06E-73    | 1.17E-70    |
| Ces2h         | 6.497646861 | 6.213388294 | 1.220587716 | 5.090488962 | 3.57E-07    | 1.53E-06    |
| Rdh16f1       | 4.168895044 | 6.20602222  | 3.467260718 | 1.789892    | 0.073471275 | 0.11805262  |
| Lhpp          | 674.979508  | 6.167078661 | 0.235355179 | 26.20328428 | 2.44E-151   | 2.08E-147   |
| 1810046K07Rik | 22.29436623 | 6.149120779 | 0.88326271  | 6.96182541  | 3.36E-12    | 2.59E-11    |
| Barhl1        | 5.234990742 | 6.06738596  | 1.233976409 | 4.916938375 | 8.79E-07    | 3.58E-06    |
| Gm38392       | 21.27553599 | 6.057640577 | 0.843528596 | 7.18131028  | 6.90E-13    | 5.77E-12    |
| Cyp2d40       | 512.2619971 | 6.052650186 | 0.866864166 | 6.982236002 | 2.91E-12    | 2.25E-11    |
| Susd4         | 312.0085162 | 6.048910684 | 0.319279146 | 18.94552385 | 4.81E-80    | 4.82E-77    |
| Gm3787        | 33.87397287 | 6.03228296  | 0.600268868 | 10.04930172 | 9.25E-24    | 1.97E-22    |
| Rarres1       | 935.8496786 | 6.024590277 | 0.485823856 | 12.40077077 | 2.59E-35    | 1.35E-33    |
| Slc13a2       | 40.23323212 | 6.019936486 | 0.579002253 | 10.39708647 | 2.56E-25    | 6.16E-24    |
| Gm7631        | 3.572790175 | 5.983376117 | 1.660767139 | 3.602778484 | 0.000314834 | 0.000870955 |
| Cyp4a10       | 2985.805226 | 5.954149922 | 0.831156077 | 7.163696555 | 7.85E-13    | 6.50E-12    |
| Nr1i3         | 2664.205587 | 5.921380533 | 0.731444248 | 8.095463945 | 5.70E-16    | 6.37E-15    |
| Sun3          | 3.34104     | 5.890808635 | 1.440633963 | 4.089039123 | 4.33E-05    | 0.000138677 |
| Car5a         | 552.7408228 | 5.873049447 | 1.045650067 | 5.616649041 | 1.95E-08    | 9.75E-08    |
| Cyp2d9        | 16804.63453 | 5.863557338 | 0.347955342 | 16.85146519 | 1.02E-63    | 3.06E-61    |
| Sdr9c7        | 554.5482984 | 5.863234189 | 0.739827554 | 7.925136275 | 2.28E-15    | 2.41E-14    |
| Irx1          | 3.241174812 | 5.852884628 | 1.495372308 | 3.91399827  | 9.08E-05    | 0.00027641  |
| Dmbt1         | 107.3291806 | 5.823598912 | 3.009337655 | 1.935176301 | 0.052968665 | 0.088686879 |
| Cyp2c38       | 287.777364  | 5.792222028 | 0.393624919 | 14.71507963 | 5.16E-49    | 7.04E-47    |
| BC024139      | 135.656279  | 5.742240878 | 0.326690409 | 17.57701087 | 3.70E-69    | 1.47E-66    |
| Mfsd2a        | 121.9199999 | 5.74177919  | 0.511193433 | 11.23210671 | 2.84E-29    | 9.25E-28    |
| Mup20         | 114398.8694 | 5.716471729 | 1.039284041 | 5.500394024 | 3.79E-08    | 1.83E-07    |
| Serpina3k     | 130547.3684 | 5.714087343 | 0.970471961 | 5.887946868 | 3.91E-09    | 2.13E-08    |
| Mup4          | 2.998798764 | 5.712177703 | 1.54468178  | 3.697964058 | 0.000217336 | 0.00062073  |
| Olfr1193      | 2.957298608 | 5.692245402 | 2.092052282 | 2.720890607 | 0.00651063  | 0.013797355 |
| Cyp2c29       | 10967.96121 | 5.668871073 | 0.833491281 | 6.80135618  | NA          | NA          |
| Trpv1         | 2.835518971 | 5.642737164 | 1.539322471 | 3.665727793 | 0.000246636 | 0.000696942 |
| Gm13237       | 2.828623639 | 5.638459616 | 1.524351078 | 3.698924543 | 0.000216515 | 0.000618697 |
| Slc6a21       | 4.21215645  | 5.628371563 | 1.458960013 | 3.857797001 | 0.000114414 | 0.000342497 |
| Ugt2b1        | 7484.476336 | 5.608462069 | 0.750535971 | 7.472609293 | 7.86E-14    | 7.17E-13    |
| Nat1          | 17.1865065  | 5.601812299 | 0.74675884  | 7.501501156 | 6.31E-14    | 5.81E-13    |
| Ugt2b37       | 45.23857389 | 5.593123439 | 0.776939185 | 7.198920516 | 6.07E-13    | 5.09E-12    |
| Gm48165       | 4.015698054 | 5.577093121 | 1.327400775 | 4.201514138 | 2.65E-05    | 8.76E-05    |
| Cyp2u1        | 397.9360116 | 5.5750861   | 0.227337109 | 24.52343182 | 8.31E-133   | 4.72E-129   |
| Cyp1a2        | 7741.438362 | 5.557528675 | 1.272530756 | 4.36730401  | 1.26E-05    | 4.36E-05    |
| Rd3           | 27.25928888 | 5.551933969 | 0.737529483 | 7.527745128 | 5.16E-14    | 4.81E-13    |
| Kcnk10        | 11.70622222 | 5.531822441 | 0.835280097 | 6.622715494 | 3.53E-11    | 2.42E-10    |
| Nudt7         | 8529.720853 | 5.493668922 | 0.275692989 | 19.92676329 | 2.38E-88    | 4.52E-85    |
| Sdr16c5       | 2.548909339 | 5.47136925  | 1.679709006 | 3.257331616 | 0.00112465  | 0.002808    |
| Cyp2d36-ps    | 60.20810953 | 5.47119213  | 0.540383549 | 10.12464599 | 4.30E-24    | 9.39E-23    |
| Cpsf4l        | 75.99388896 | 5.470316071 | 0.415665549 | 13.16037879 | 1.48E-39    | 1.05E-37    |
| C6            | 3237.005893 | 5.436439265 | 0.766703772 | 7.090664566 | 1.33E-12    | 1.08E-11    |
| Gm6614        | 3.68598816  | 5.395234767 | 1.324782254 | 4.072544565 | 4.65E-05    | 0.000148098 |
| Ptprt         | 11.04803538 | 5.390148394 | 0.912326317 | 5.908136476 | 3.46E-09    | 1.89E-08    |
| Adrb3         | 172.0406173 | 5.369743607 | 0.854624759 | 6.283159424 | 3.32E-10    | 2.04E-09    |
| Tex12         | 8.143480656 | 5.341512547 | 1.12434086  | 4.750794655 | 2.03E-06    | 7.83E-06    |
| Oat           | 8007.15141  | 5.331360685 | 0.309436002 | 17.22928374 | 1.60E-66    | 5.46E-64    |
| Phospho1      | 164.7577013 | 5.328455012 | 0.307258287 | 17.34194075 | 2.27E-67    | 8.23E-65    |
| Mup-ps23      | 2.248936728 | 5.286333712 | 1.815071338 | 2.912466085 | 0.003585871 | 0.00804156  |
| Grem2         | 137.120032  | 5.243165469 | 0.41897571  | 12.51424689 | 6.24E-36    | 3.39E-34    |
| Gm38149       | 2.164525961 | 5.23475841  | 1.7774273   | 2.94513222  | 0.003228167 | 0.00731735  |
| Ugt1a9        | 769.0474462 | 5.22292003  | 1.131676867 | 4.615204375 | 3.93E-06    | 1.47E-05    |
| Slc25a21      | 132.7363629 | 5.218169798 | 0.477388794 | 10.93064995 | 8.23E-28    | 2.42E-26    |
| Zfp872        | 11.75130128 | 5.203664247 | 0.882052698 | 5.8994936   | 3.65E-09    | 1.99E-08    |
| Serpina1e     | 110933.1371 | 5.185057088 | 0.308949986 | 16.78283645 | 3.26E-63    | 9.42E-61    |
| Gm11619       | 2.055349494 | 5.184678504 | 1.851730148 | 2.799910402 | 0.005111679 | 0.011089833 |
| Dct           | 91.69256188 | 5.182195694 | 0.365813707 | 14.16621518 | 1.48E-45    | 1.64E-43    |
| Rnase13       | 14.63685484 | 5.175314221 | 0.763611799 | 6.777415206 | 1.22E-11    | 8.87E-11    |
| Dio1          | 1317.589279 | 5.169830887 | 0.447564112 | 11.55103984 | 7.29E-31    | 2.75E-29    |
| Pon1          | 7755.00462  | 5.156407808 | 0.871529578 | 5.916503509 | 3.29E-09    | 1.80E-08    |
| Cnmd          | 63.00580627 | 5.135694595 | 1.301725956 | 3.945296298 | 7.97E-05    | 0.000245085 |
| Cyp2d41-ps    | 87.31114231 | 5.101452686 | 0.559362212 | 9.120123909 | 7.50E-20    | 1.18E-18    |

|               |             |             |             |             |             |             |
|---------------|-------------|-------------|-------------|-------------|-------------|-------------|
| Gm4956        | 318.7886297 | 5.095939976 | 0.304618074 | 16.72894817 | 8.06E-63    | 2.25E-60    |
| Wfdc21        | 2407.932689 | 5.091234758 | 0.929245199 | 5.478892721 | 4.28E-08    | 2.05E-07    |
| Lrit1         | 190.4542348 | 5.090813516 | 0.971969105 | 5.237628941 | 1.63E-07    | 7.31E-07    |
| Lipg          | 61.50717374 | 5.071329274 | 0.507522215 | 9.992329637 | 1.65E-23    | 3.46E-22    |
| Gm4804        | 10.54410616 | 5.070897421 | 0.852656966 | 5.947171752 | 2.73E-09    | 1.51E-08    |
| Mogat1        | 8.613429702 | 5.069239313 | 0.944559547 | 5.366775794 | 8.02E-08    | 3.73E-07    |
| 4930579F01Rik | 2.881294168 | 5.057881781 | 1.457157893 | 3.471059524 | 0.000518409 | 0.001380481 |
| Olfr131       | 2.964492867 | 5.040334802 | 1.451405767 | 3.472726179 | 0.000515201 | 0.001372795 |
| Alx1          | 1.840519713 | 5.012347693 | 1.889665293 | 2.652505557 | 0.007989681 | 0.016610742 |
| Cyp8b1        | 4679.727272 | 4.99569824  | 0.779505386 | 6.40880529  | 1.47E-10    | 9.41E-10    |
| Slc10a1       | 5272.984777 | 4.990186768 | 0.374739003 | 13.31643285 | 1.86E-40    | 1.43E-38    |
| Car3          | 40467.08411 | 4.983985776 | 0.624403562 | 7.98199447  | 1.44E-15    | 1.56E-14    |
| Fmn2          | 21.38492343 | 4.972062386 | 0.793076246 | 6.269337166 | 3.63E-10    | 2.22E-09    |
| Gm49059       | 3.92956172  | 4.97190994  | 1.229554146 | 4.043668966 | 5.26E-05    | 0.000166035 |
| Cyp2d34       | 133.7645267 | 4.970736198 | 0.296601714 | 16.75895977 | 4.87E-63    | 1.38E-60    |
| Nxpe2         | 151.3359821 | 4.955409668 | 0.354733919 | 13.96937087 | 2.40E-44    | 2.42E-42    |
| Mcm10         | 1558.724666 | 4.950172401 | 0.292678936 | 16.91331967 | 3.59E-64    | 1.11E-61    |
| Rgs1          | 5.703380056 | 4.947200642 | 1.152278686 | 4.293406363 | 1.76E-05    | 5.98E-05    |
| Cyp2c37       | 3374.481411 | 4.946515834 | 0.337215551 | 14.66870615 | 1.02E-48    | 1.37E-46    |
| Notum         | 281.2435571 | 4.925539172 | 0.809487296 | 6.084764015 | 1.17E-09    | 6.75E-09    |
| Gm13577       | 2.742545251 | 4.913576526 | 1.48598232  | 3.306618431 | 0.000944294 | 0.002394516 |
| Gm13303       | 1.694867093 | 4.895824058 | 2.353265631 | 2.080438347 | 0.037485345 | 0.065536885 |
| Rdh16f2       | 690.7881921 | 4.894529278 | 1.378077728 | 3.5517077   | 0.00038274  | 0.001044828 |
| Gm44973       | 1.648293304 | 4.847952188 | 3.094772207 | 1.566497262 | 0.117232249 | 0.176880731 |
| Saa1          | 1521.580238 | 4.837241384 | 1.149792302 | 4.207056681 | NA          | NA          |
| Gm13683       | 1.608562799 | 4.823036989 | 1.95755558  | 2.463805901 | 0.013747053 | NA          |
| Gm12337       | 1.606119679 | 4.820148786 | 1.878172123 | 2.566404179 | 0.010275901 | NA          |
| Gm15333       | 1.627546241 | 4.818980954 | 2.013190514 | 2.393703388 | 0.016679231 | NA          |
| Gabbr2        | 129.1712009 | 4.813020847 | 0.636663994 | 7.559750343 | 4.04E-14    | 3.80E-13    |
| Gm13304       | 2.553151427 | 4.805794673 | 2.387842249 | 2.012609784 | 0.044155697 | 0.075687177 |
| Alas2         | 1120.081637 | 4.783697263 | 0.280685462 | 17.04291069 | 3.95E-65    | 1.27E-62    |
| Cyp2c54       | 3871.523721 | 4.777476854 | 0.358875904 | 13.31233667 | 1.96E-40    | 1.51E-38    |
| Cyp2a5        | 8065.403287 | 4.730826393 | 0.824385826 | 5.738607148 | 9.55E-09    | 4.96E-08    |
| Cyp3a11       | 62420.13179 | 4.721284712 | 1.061419887 | 4.4480839   | 8.66E-06    | 3.09E-05    |
| Acaa1b        | 11773.88965 | 4.712863427 | 0.437887179 | 10.76273446 | 5.16E-27    | 1.42E-25    |
| Gm8942        | 2.329725828 | 4.700974465 | 1.61743124  | 2.906444707 | 0.003655615 | 0.00818827  |
| Gm12191       | 3.876624843 | 4.700130542 | 2.335132797 | 2.0127894   | 0.04413679  | 0.07566814  |
| Mup-ps11      | 1.459293991 | 4.683142793 | 2.458257726 | 1.905065829 | 0.056771515 | NA          |
| Ang           | 2332.863202 | 4.648086032 | 0.335363081 | 13.85986202 | 1.11E-43    | 1.06E-41    |
| Cyp2d35-ps    | 2.25457612  | 4.631409717 | 1.56943719  | 2.951000362 | 0.003167465 | 0.007196022 |
| Gm18259       | 4.485426956 | 4.611928072 | 1.230292606 | 3.748643249 | 0.000177794 | 0.000515139 |
| Saa2          | 698.0075254 | 4.607323863 | 1.280398433 | 3.598351687 | NA          | NA          |
| Gm7332        | 5.332898199 | 4.604593929 | 3.439642567 | 1.338683843 | 0.180673618 | 0.254675767 |
| Mup-ps2       | 1.351573417 | 4.598449789 | 2.476634546 | 1.856733282 | 0.06334911  | NA          |
| Zfp982        | 49.08383912 | 4.597567755 | 0.428433453 | 10.7311129  | 7.27E-27    | 1.97E-25    |
| Ces1e         | 1645.141884 | 4.578780237 | 0.420250435 | 10.89536108 | 1.21E-27    | 3.50E-26    |
| Nat8f6        | 11.89664829 | 4.578739734 | 0.976557399 | 4.688653976 | 2.75E-06    | 1.05E-05    |
| Vmn1r-ps135   | 4.372779275 | 4.561888926 | 1.344082753 | 3.394053614 | 0.000688662 | 0.001789954 |
| Ptpn5         | 3.815588007 | 4.556800042 | 1.910594216 | 2.385017187 | 0.017078323 | 0.032643935 |
| Spag17        | 1.948351429 | 4.542874757 | 2.215391359 | 2.050596947 | 0.040306214 | 0.069881047 |
| 9030619P08Rik | 43.17291397 | 4.539850467 | 0.835672454 | 5.432571631 | 5.55E-08    | 2.63E-07    |
| Cyp2d38-ps    | 321.6818159 | 4.53288067  | 0.325959561 | 13.90626694 | 5.80E-44    | 5.62E-42    |
| Ccdc183       | 2.003755045 | 4.531008846 | 1.651543805 | 2.743499041 | 0.006078823 | 0.012968561 |
| Kbtbd12       | 7.407472077 | 4.512084563 | 0.93048602  | 4.849169644 | 1.24E-06    | 4.94E-06    |
| Lipc          | 1555.401029 | 4.486408745 | 0.928096772 | 4.833988093 | NA          | NA          |
| Tmem28        | 13.26804817 | 4.476110527 | 0.996290083 | 4.492778362 | 7.03E-06    | 2.54E-05    |
| Ugt3a1        | 701.9742732 | 4.472183694 | 0.470265168 | 9.50991908  | 1.91E-21    | 3.42E-20    |
| Cd209g        | 1.239131492 | 4.468638748 | 2.091935677 | 2.136126267 | 0.032669123 | NA          |
| Sema5b        | 32.94688532 | 4.464210524 | 0.695992222 | 6.414167264 | 1.42E-10    | 9.11E-10    |
| Gm48417       | 172.6739298 | 4.459909429 | 0.360797566 | 12.36125144 | 4.24E-35    | 2.17E-33    |
| Gulo          | 3257.468846 | 4.447308365 | 0.722103971 | 6.158819979 | 7.33E-10    | 4.33E-09    |
| Mup6          | 9.170481752 | 4.440748395 | 0.890935974 | 4.984363103 | 6.22E-07    | 2.57E-06    |
| Gm18206       | 1.243391838 | 4.437266696 | 2.618534476 | 1.694561113 | 0.090158709 | NA          |
| Gm26920       | 1.223806052 | 4.434306304 | 2.603453372 | 1.703240147 | 0.088523136 | NA          |
| Lect2         | 1139.071323 | 4.426550955 | 1.025365608 | 4.317046445 | 1.58E-05    | 5.42E-05    |
| Zfp981        | 6.609840875 | 4.41708267  | 1.109363602 | 3.981636556 | 6.84E-05    | 0.000212456 |

|               |             |             |             |             |                |             |
|---------------|-------------|-------------|-------------|-------------|----------------|-------------|
| Hcrtr2        | 11.66012286 | 4.417066329 | 0.971833407 | 4.545085914 | 5.49E-06       | 2.01E-05    |
| Cyp2d32-ps    | 1.973497183 | 4.406284461 | 1.609734665 | 2.73727376  | 0.006195072    | 0.01318357  |
| Ntrk1         | 4.479229679 | 4.405114433 | 1.384193228 | 3.182441832 | 0.001460388    | 0.003559723 |
| Gpx6          | 5.522593133 | 4.39356893  | 1.221193196 | 3.597767285 | 0.000320961    | 0.000886685 |
| Gm7329        | 17.52370826 | 4.385805963 | 0.763033231 | 5.747857082 | 9.04E-09       | 4.72E-08    |
| Apoc3         | 16282.26969 | 4.383631049 | 0.722724237 | 6.065426929 | 1.32E-09       | 7.56E-09    |
| Fbxo40        | 6.221307247 | 4.382417929 | 1.295593299 | 3.382556804 | 0.000718144    | 0.001860627 |
| Acacb         | 478.6244553 | 4.368836144 | 0.446337003 | 9.78820066  | 1.27E-22       | 2.49E-21    |
| Fgf4          | 1.17735236  | 4.359820543 | 3.397616712 | 1.28319964  | 0.199422142 NA |             |
| Mup-ps9       | 1.17735236  | 4.359820543 | 3.397616712 | 1.28319964  | 0.199422142 NA |             |
| Cyp4a32       | 279.7200676 | 4.353969726 | 0.748466198 | 5.817189522 | 5.98E-09       | 3.18E-08    |
| Lgr5          | 39.70784959 | 4.345280325 | 0.549695504 | 7.904886057 | 2.68E-15       | 2.82E-14    |
| Obp2a         | 32.9948232  | 4.343793741 | 0.466235759 | 9.316732277 | 1.20E-20       | 2.02E-19    |
| Gm10132       | 1.158425076 | 4.342414799 | 2.643333141 | 1.642779993 | 0.100428461 NA |             |
| Myl7          | 1.156387014 | 4.331460663 | 2.17611192  | 1.990458589 | 0.046540441 NA |             |
| Upp2          | 3366.512302 | 4.325604567 | 0.406786264 | 10.63360529 | 2.08E-26       | 5.43E-25    |
| Alox15        | 2.517638167 | 4.319767517 | 1.475383029 | 2.927895626 | 0.003412646    | 0.007696141 |
| Olig1         | 68.90777204 | 4.319301469 | 1.198940213 | 3.602599549 | 0.000315051    | 0.000871347 |
| Gpr12         | 16.63300574 | 4.317740705 | 0.636542336 | 6.78311632  | 1.18E-11       | 8.54E-11    |
| Mab2112       | 8.676716991 | 4.314926717 | 0.971751039 | 4.440362341 | 8.98E-06       | 3.19E-05    |
| Aox3          | 7828.175104 | 4.308590387 | 0.307065128 | 14.0315197  | 1.00E-44       | 1.05E-42    |
| Cmah          | 1541.480036 | 4.30194179  | 0.442086545 | 9.730994609 | 2.22E-22       | 4.27E-21    |
| Clstn3        | 221.8894392 | 4.289882388 | 0.535825293 | 8.006121474 | 1.18E-15       | 1.29E-14    |
| Car1          | 90.41154319 | 4.286195149 | 0.44017492  | 9.737481526 | 2.09E-22       | 4.02E-21    |
| Ces2c         | 1172.922956 | 4.272050639 | 0.416301612 | 10.26191231 | 1.05E-24       | 2.42E-23    |
| Rgs16         | 690.7574756 | 4.268708295 | 0.492988282 | 8.658843328 | 4.77E-18       | 6.46E-17    |
| Hopx          | 608.5085851 | 4.258967488 | 0.31572997  | 13.48927213 | 1.81E-41       | 1.51E-39    |
| mt-Nd6        | 582.9676264 | 4.247986713 | 0.31778154  | 13.36763208 | 9.35E-41       | 7.41E-39    |
| Akr1c6        | 11201.23723 | 4.237177558 | 0.97457692  | 4.347709728 | 1.38E-05       | 4.75E-05    |
| Gm15372       | 1.050161392 | 4.23589772  | 2.67158541  | 1.585537076 | 0.11284436 NA  |             |
| Olfr463       | 1.050081414 | 4.235796202 | 2.671634416 | 1.585469994 | 0.112859589 NA |             |
| Gm12663       | 2.743552332 | 4.234061693 | 1.669948674 | 2.535444208 | 0.011230482    | 0.022534987 |
| Cyp2d37-ps    | 1814.666225 | 4.217151465 | 0.337999693 | 12.47679081 | 9.99E-36       | 5.34E-34    |
| ldo2          | 723.2642198 | 4.205298192 | 0.498441372 | 8.43689635  | 3.26E-17       | 4.11E-16    |
| Olfr825       | 11.77304351 | 4.199694632 | 0.770686127 | 5.449293152 | 5.06E-08       | 2.40E-07    |
| Acvr1c        | 2.367943668 | 4.196012304 | 2.193594966 | 1.912847344 | 0.055767598    | 0.092650695 |
| F11           | 946.244477  | 4.186701599 | 0.272352476 | 15.37236475 | 2.51E-53       | 4.19E-51    |
| Clic3         | 1.502809243 | 4.185318333 | 1.816930464 | 2.303510462 | 0.021250139 NA |             |
| Saa4          | 3439.019247 | 4.179576404 | 0.458959183 | 9.106640754 | 8.50E-20       | 1.33E-18    |
| Slc22a28      | 216.7509026 | 4.174371442 | 0.975400011 | 4.279650804 | 1.87E-05       | 6.33E-05    |
| Tbx3          | 258.1673612 | 4.173387467 | 0.398650713 | 10.46878214 | 1.20E-25       | 2.99E-24    |
| Scnn1a        | 566.1695634 | 4.169398502 | 0.477620556 | 8.729520648 | 2.56E-18       | 3.54E-17    |
| Gm11437       | 16.17875247 | 4.167774392 | 0.686305746 | 6.072766277 | 1.26E-09       | 7.24E-09    |
| Gm20523       | 12.52522853 | 4.165321202 | 0.740357045 | 5.62609788  | 1.84E-08       | 9.25E-08    |
| Cyp2f2        | 14464.52147 | 4.164257204 | 0.351009366 | 11.86366405 | 1.83E-32       | 7.81E-31    |
| Slco1b2       | 8026.514126 | 4.161291706 | 0.218354909 | 19.05746811 | 5.70E-81       | 6.07E-78    |
| Nat8f2        | 9913.65656  | 4.1484007   | 0.679750506 | 6.102828409 | 1.04E-09       | 6.06E-09    |
| Gm49340       | 3.932459065 | 4.145558305 | 1.704757448 | 2.431758437 | 0.015025725    | 0.029145358 |
| Gm9726        | 1.616139598 | 4.142941589 | 2.028244997 | 2.042623842 | 0.041089689 NA |             |
| Glul          | 8418.019342 | 4.140163606 | 0.287527856 | 14.39917392 | 5.24E-47       | 6.24E-45    |
| AC132444.6    | 13.83802958 | 4.139258452 | 0.680043864 | 6.086752153 | 1.15E-09       | 6.67E-09    |
| Gm15159       | 0.985466557 | 4.133537574 | 2.237709598 | 1.847218056 | 0.064715544 NA |             |
| Slc22a1       | 2747.135942 | 4.131965806 | 0.41075857  | 10.05935386 | 8.35E-24       | 1.79E-22    |
| Selenbp2      | 20168.25403 | 4.131696732 | 0.618694264 | 6.678091221 | 2.42E-11       | 1.69E-10    |
| Gm4737        | 14.63037732 | 4.127772834 | 2.320012206 | 1.779203068 | 0.075206476    | 0.120466034 |
| 2410024N13Rik | 1.006729883 | 4.123920562 | 2.325689922 | 1.773203092 | 0.07619506 NA  |             |
| Rpl19-ps3     | 8.091008619 | 4.12304538  | 1.029425501 | 4.00519064  | 6.20E-05       | 0.000193413 |
| Hmga1b        | 1.647418495 | 4.11992174  | 2.488244518 | 1.655754372 | 0.097771571    | 0.151459314 |
| Rdh18-ps      | 3.307156776 | 4.11287906  | 1.322082556 | 3.110909408 | 0.001865121    | 0.004439005 |
| Sult2a7       | 15.77159941 | 4.111902256 | 0.690937124 | 5.951196008 | 2.66E-09       | 1.47E-08    |
| Aspg          | 2687.020922 | 4.109533866 | 0.84479931  | 4.864509021 | 1.15E-06       | 4.60E-06    |
| Cyp2c50       | 10083.07773 | 4.100713924 | 0.306479605 | 13.38005483 | 7.91E-41       | 6.33E-39    |
| Gm48976       | 27.61550478 | 4.07331445  | 0.48895885  | 8.330587438 | 8.04E-17       | 9.72E-16    |
| Rxrg          | 52.22898749 | 4.071075563 | 0.430863694 | 9.448639143 | 3.43E-21       | 6.03E-20    |
| Ccl27         | 0.930592825 | 4.053898575 | 2.787307692 | 1.454413729 | 0.145831636 NA |             |
| Olfr794       | 3.497933739 | 4.053288043 | 1.326789806 | 3.054958686 | 0.002250915    | 0.005267482 |

|               |             |             |             |             |                |             |
|---------------|-------------|-------------|-------------|-------------|----------------|-------------|
| Ces2d-ps      | 12.12245899 | 4.047796154 | 0.67891256  | 5.962175975 | 2.49E-09       | 1.38E-08    |
| Gm26965       | 0.943270501 | 4.036838395 | 3.51182203  | 1.149499707 | 0.250349987 NA |             |
| Calcoco2      | 0.941881888 | 4.03435532  | 3.511867351 | 1.14877782  | 0.250647607 NA |             |
| Gm13123       | 0.941881888 | 4.03435532  | 3.511867351 | 1.14877782  | 0.250647607 NA |             |
| Gm49496       | 0.941881888 | 4.03435532  | 3.511867351 | 1.14877782  | 0.250647607 NA |             |
| Nr0b1         | 0.941881888 | 4.03435532  | 3.511867351 | 1.14877782  | 0.250647607 NA |             |
| Slc27a5       | 7367.584655 | 4.017099098 | 0.332978559 | 12.06413744 | 1.63E-33       | 7.47E-32    |
| Wdr63         | 0.902374498 | 4.01636317  | 2.891870101 | 1.388846328 | 0.164879484 NA |             |
| Bnc1          | 0.901436932 | 4.015913912 | 2.825871489 | 1.421124042 | 0.155280702 NA |             |
| Gm8522        | 0.900462735 | 4.014720737 | 2.810226671 | 1.428611001 | 0.15311607 NA  |             |
| Gm12267       | 0.919647051 | 4.014651186 | 2.841809631 | 1.412709402 | 0.157741186 NA |             |
| Gm13521       | 0.91964925  | 4.014650473 | 2.841808417 | 1.412709755 | 0.157741082 NA |             |
| Chst4         | 1.443326354 | 4.003957779 | 1.775920187 | 2.254582052 | 0.024159575 NA |             |
| Gm16581       | 2.071492833 | 3.995188453 | 1.455986619 | 2.74397333  | 0.006070047    | 0.012951459 |
| Shh           | 3.247544386 | 3.993022315 | 1.601326394 | 2.493571785 | 0.012646501    | 0.025011316 |
| Olfr1477      | 1.478917872 | 3.986293955 | 2.094220499 | 1.903473849 | 0.056978743 NA |             |
| Stkld1        | 5.146138658 | 3.985392504 | 1.020370432 | 3.905829077 | 9.39E-05       | 0.000285408 |
| Apoa5         | 11384.61825 | 3.983653554 | 0.770990594 | 5.166928863 | 2.38E-07       | 1.04E-06    |
| Fam89a        | 66.33821492 | 3.978481123 | 0.693269833 | 5.738719518 | 9.54E-09       | 4.96E-08    |
| Gm12461       | 2.310106937 | 3.975907103 | 1.460400459 | 2.722477304 | 0.006479448    | 0.013737301 |
| Tspan1        | 0.937700231 | 3.975471747 | 2.414602539 | 1.646429043 | 0.099675458 NA |             |
| C8b           | 4033.005069 | 3.966668229 | 0.253424162 | 15.65228903 | 3.20E-55       | 5.94E-53    |
| Acs16         | 6.138041181 | 3.962403587 | 1.008876543 | 3.927540605 | 8.58E-05       | 0.000262664 |
| Nnmt          | 830.1948123 | 3.954844268 | 0.390173524 | 10.13611644 | 3.82E-24       | 8.41E-23    |
| Myh1          | 2.220722225 | 3.952324407 | 1.750653509 | 2.257628015 | 0.023968861    | 0.044160935 |
| Cxcl11        | 47.7506144  | 3.944834603 | 0.720373232 | 5.476098264 | 4.35E-08       | 2.08E-07    |
| 6030498E09Rik | 0.853656287 | 3.939800586 | 2.866417674 | 1.374468425 | 0.169296306 NA |             |
| Fabp12        | 2.295370073 | 3.939088889 | 1.738860379 | 2.265327876 | 0.023492567    | 0.043372458 |
| Chrna2        | 41.1927563  | 3.935796696 | 0.568807663 | 6.919380572 | 4.54E-12       | 3.46E-11    |
| Aqp9          | 3725.947173 | 3.935600557 | 0.402955064 | 9.766847251 | 1.56E-22       | 3.03E-21    |
| Trpc6         | 140.0610008 | 3.934058631 | 0.444592743 | 8.848679367 | 8.86E-19       | 1.28E-17    |
| Gm2568        | 10.96468839 | 3.93037206  | 0.797709174 | 4.927073912 | 8.35E-07       | 3.41E-06    |
| Nwd2          | 2.97206742  | 3.923381202 | 1.343958713 | 2.919272121 | 0.003508498    | 0.007886719 |
| Gramd1c       | 570.255424  | 3.919346634 | 0.29752558  | 13.17314171 | 1.25E-39       | 9.01E-38    |
| Cyp4a12a      | 7084.867744 | 3.909814206 | 0.39002257  | 10.02458449 | 1.19E-23       | 2.52E-22    |
| Cpne4         | 0.917888217 | 3.907013602 | 2.987964949 | 1.307583478 | 0.191014624 NA |             |
| Gm43596       | 13.3368134  | 3.900020844 | 0.858443557 | 4.543130196 | 5.54E-06       | 2.03E-05    |
| Stx1b         | 72.3381876  | 3.898449384 | 0.410918028 | 9.487170469 | 2.37E-21       | 4.24E-20    |
| Ppef1         | 2.504163865 | 3.898288397 | 1.400023909 | 2.78444416  | 0.005361955    | 0.011587098 |
| Gm5626        | 37.33489531 | 3.897095253 | 0.421189777 | 9.252587472 | 2.19E-20       | 3.61E-19    |
| Gm48493       | 134.964034  | 3.89463663  | 1.698626052 | 2.292815788 | 0.021858613    | 0.040695165 |
| Olfr140       | 0.836735742 | 3.893310134 | 2.410073094 | 1.615432388 | 0.106217091 NA |             |
| Gm15375       | 0.836526786 | 3.892984025 | 2.410195463 | 1.615215066 | 0.106264129 NA |             |
| Tmprss11e     | 0.835776126 | 3.892019842 | 2.36503605  | 1.645649267 | 0.09983599 NA  |             |
| Tma7-ps       | 0.854410755 | 3.890449999 | 2.9807169   | 1.30520614  | 0.191822664 NA |             |
| Ccdc152       | 4.482086549 | 3.888695126 | 1.102834062 | 3.526092693 | 0.000421739    | 0.001141602 |
| Slc9a3        | 1.370662819 | 3.885064486 | 2.704666587 | 1.436430096 | 0.150879994 NA |             |
| Unc93a        | 33.76966554 | 3.881617634 | 0.476943252 | 8.138531409 | 4.00E-16       | 4.55E-15    |
| Cyp2d12       | 166.6728409 | 3.876367817 | 0.261564241 | 14.8199456  | 1.09E-49       | 1.52E-47    |
| Adh4          | 1185.41658  | 3.874372162 | 0.817826319 | 4.737402151 | 2.16E-06       | 8.33E-06    |
| BC048671      | 1.312739345 | 3.869976166 | 1.827926534 | 2.117139882 | 0.034247978 NA |             |
| Acss3         | 191.9616548 | 3.859133076 | 0.332611628 | 11.60252004 | 4.00E-31       | 1.53E-29    |
| Rnase4        | 8950.068171 | 3.858855262 | 0.217992279 | 17.70179789 | 4.06E-70       | 1.73E-67    |
| Opn1sw        | 2.639527251 | 3.852074116 | 1.461073266 | 2.636468825 | 0.00837739     | 0.01733225  |
| Gm4756        | 590.3160664 | 3.847970357 | 0.793751033 | 4.847830362 | 1.25E-06       | 4.97E-06    |
| Ugt2a3        | 2709.488926 | 3.847673356 | 0.48456314  | 7.940499467 | 2.01E-15       | 2.15E-14    |
| Ccn6          | 4.218877575 | 3.838172379 | 1.262795286 | 3.039425647 | 0.002370297    | 0.005522594 |
| Phyh          | 26607.86159 | 3.829648399 | 0.253765828 | 15.09126909 | 1.85E-51       | 2.81E-49    |
| Nr1h5         | 46.85791092 | 3.820527041 | 0.549046656 | 6.958474294 | 3.44E-12       | 2.65E-11    |
| Adam2         | 1.359924569 | 3.820517482 | 1.855798381 | 2.058692108 | 0.039523743 NA |             |
| Gm826         | 18.61344352 | 3.809128046 | 0.660441712 | 5.76754614  | 8.04E-09       | 4.21E-08    |
| Vmn1r61       | 8.30523798  | 3.808687198 | 1.060886396 | 3.590099009 | 0.000330552    | 0.000911117 |
| Olfr716       | 4.403531001 | 3.804622887 | 1.174951393 | 3.238110878 | 0.00120324     | 0.002988468 |
| Arl4d         | 1148.049917 | 3.803456897 | 0.33238614  | 11.44288655 | 2.55E-30       | 9.20E-29    |
| Aspdh         | 1259.247002 | 3.794753793 | 0.214185682 | 17.71712173 | 3.09E-70       | 1.35E-67    |
| Avpr1a        | 244.7735732 | 3.794749463 | 0.426036407 | 8.907101375 | 5.24E-19       | 7.68E-18    |

|               |             |             |             |             |                |             |
|---------------|-------------|-------------|-------------|-------------|----------------|-------------|
| Eif4ebp3      | 599.6587009 | 3.7946149   | 0.356145534 | 10.65467495 | 1.66E-26       | 4.37E-25    |
| Orm1          | 9498.346984 | 3.792291706 | 0.789214311 | 4.805148172 | 1.55E-06       | 6.07E-06    |
| Olfr1000      | 3.330418357 | 3.784426354 | 1.267076643 | 2.986738313 | 0.00281971     | 0.006463683 |
| Ugt3a2        | 3588.986374 | 3.784175019 | 0.435119487 | 8.69686403  | 3.41E-18       | 4.68E-17    |
| Gm47974       | 10.90181544 | 3.782685223 | 0.834679271 | 4.531902678 | 5.85E-06       | 2.13E-05    |
| Lrtm1         | 51.73562619 | 3.771752348 | 0.521667091 | 7.230190312 | 4.82E-13       | 4.08E-12    |
| S1pr5         | 29.44464075 | 3.770797223 | 0.545075864 | 6.917931016 | 4.58E-12       | 3.49E-11    |
| Olfr1437      | 4.462723838 | 3.770104351 | 1.180974135 | 3.192368265 | 0.001411113    | 0.003453934 |
| Mup-ps3       | 0.772234141 | 3.755620389 | 3.018200056 | 1.244324538 | 0.213380144 NA |             |
| Olfr798       | 0.772127724 | 3.755464367 | 3.018306485 | 1.244228969 | 0.213415305 NA |             |
| Gm28044       | 0.750695287 | 3.752967942 | 2.997632106 | 1.251977497 | 0.210578064 NA |             |
| AL669898.1    | 0.770049171 | 3.751782293 | 3.020443539 | 1.242129589 | 0.214188753 NA |             |
| Rgn           | 11410.02294 | 3.749002793 | 0.747079172 | 5.018213509 | 5.22E-07       | 2.18E-06    |
| Gm12586       | 0.771138661 | 3.744992837 | 2.49897605  | 1.498610936 | 0.133974594 NA |             |
| Olfr1507      | 0.771114336 | 3.744956713 | 2.498992018 | 1.498586905 | 0.133980832 NA |             |
| Galnt14       | 1.857394694 | 3.744273358 | 1.569505896 | 2.385638287 | 0.017049511    | 0.032596172 |
| Olfr1406      | 3.146924912 | 3.731640457 | 1.28506587  | 2.903851501 | 0.003686029    | 0.008247727 |
| Gm14749       | 1.107787822 | 3.724857411 | 2.248451327 | 1.656632441 | 0.097593809 NA |             |
| C8a           | 9476.824589 | 3.721737063 | 0.393393383 | 9.460599053 | 3.06E-21       | 5.41E-20    |
| Gm10309       | 1.26292611  | 3.714908034 | 2.288335208 | 1.623410775 | 0.104501623 NA |             |
| Ssxb5         | 1.270506704 | 3.712893899 | 1.898067347 | 1.956144446 | 0.050448141 NA |             |
| Agr2          | 1.270873456 | 3.712795948 | 1.898081001 | 1.956078769 | 0.050455876 NA |             |
| Gm49102       | 7.257878074 | 3.709281517 | 0.885826371 | 4.187368583 | 2.82E-05       | 9.29E-05    |
| Npr2          | 788.4775735 | 3.696800359 | 0.508547821 | 7.269326905 | 3.61E-13       | 3.08E-12    |
| Mbl2          | 3046.644328 | 3.696311706 | 0.689483623 | 5.360985498 | 8.28E-08       | 3.84E-07    |
| Ces2b         | 38.94451889 | 3.69148581  | 0.636364595 | 5.80089753  | 6.60E-09       | 3.48E-08    |
| Pbld2         | 1694.734613 | 3.683183004 | 0.190889845 | 19.29480847 | 5.94E-83       | 6.75E-80    |
| Olfr1118      | 11.38011841 | 3.669116557 | 0.745855393 | 4.919340386 | 8.68E-07       | 3.54E-06    |
| Lifr          | 5688.985808 | 3.668832303 | 0.25746633  | 14.24975567 | 4.50E-46       | 5.11E-44    |
| Rhox4b        | 1.468029125 | 3.662247233 | 2.199698448 | 1.664886038 | 0.095935494 NA |             |
| Uox           | 13460.04592 | 3.661633884 | 0.314316487 | 11.64951262 | 2.31E-31       | 9.04E-30    |
| Gbp11         | 288.3251662 | 3.654927682 | 0.869893757 | 4.201579392 | 2.65E-05       | 8.76E-05    |
| Tulp2         | 3.042199486 | 3.649753421 | 1.29161687  | 2.825724491 | 0.004717382    | 0.010309182 |
| Leap2         | 597.7071411 | 3.630399463 | 0.363082166 | 9.99883719  | 1.54E-23       | 3.25E-22    |
| Oxt           | 1.185336543 | 3.623202863 | 1.868716397 | 1.938872516 | 0.052516863 NA |             |
| Rgs6          | 1.971647148 | 3.611862833 | 2.251434534 | 1.604249547 | 0.108659057    | 0.165705305 |
| 4930412O13Rik | 0.706411416 | 3.611364437 | 3.531169069 | 1.022710713 | 0.306444645 NA |             |
| Duox1         | 0.706411416 | 3.611364437 | 3.531169069 | 1.022710713 | 0.306444645 NA |             |
| Gm12669       | 0.706411416 | 3.611364437 | 3.531169069 | 1.022710713 | 0.306444645 NA |             |
| Gm13214       | 0.706411416 | 3.611364437 | 3.531169069 | 1.022710713 | 0.306444645 NA |             |
| Gm18562       | 0.706411416 | 3.611364437 | 3.531169069 | 1.022710713 | 0.306444645 NA |             |
| Gm4322        | 0.706411416 | 3.611364437 | 3.531169069 | 1.022710713 | 0.306444645 NA |             |
| Mybpc1        | 0.706411416 | 3.611364437 | 3.531169069 | 1.022710713 | 0.306444645 NA |             |
| Pla2g1b       | 0.706411416 | 3.611364437 | 3.531169069 | 1.022710713 | 0.306444645 NA |             |
| Gm45657       | 1.854079014 | 3.608540709 | 1.586605105 | 2.274378607 | 0.022943233    | 0.042496331 |
| Upk3b         | 15.22438896 | 3.608152921 | 0.791699675 | 4.557476825 | 5.18E-06       | 1.90E-05    |
| Gm11263       | 1.187586178 | 3.606468399 | 2.806349569 | 1.28511018  | 0.198753785 NA |             |
| Zfp-ps        | 3.57022393  | 3.60565589  | 1.236022535 | 2.917144137 | 0.003532525    | 0.007932361 |
| Ap3s1-ps2     | 0.687082866 | 3.603644486 | 3.156179368 | 1.141774299 | 0.253547848 NA |             |
| Grin2c        | 0.686187589 | 3.601529589 | 2.563739294 | 1.404795565 | 0.160082078 NA |             |
| Rpl31-ps4     | 0.685429516 | 3.600117812 | 2.564363574 | 1.403903038 | 0.160347725 NA |             |
| Agxt          | 2932.731679 | 3.59548627  | 0.4187959   | 8.585294821 | 9.06E-18       | 1.20E-16    |
| Car4          | 0.666067692 | 3.590949393 | 3.157035976 | 1.137443292 | 0.255353018 NA |             |
| Nmrk2         | 12.08514761 | 3.590480826 | 0.677765738 | 5.297524831 | 1.17E-07       | 5.34E-07    |
| Olfr1258      | 1.030368412 | 3.587280858 | 2.019516394 | 1.776306877 | 0.07568235 NA  |             |
| Cabyr         | 44.55192295 | 3.581697581 | 0.507039822 | 7.063937437 | 1.62E-12       | 1.30E-11    |
| Trpc2         | 9.356192223 | 3.577050705 | 2.523799834 | 1.417327419 | 0.156387222    | 0.22565293  |
| Gm48054       | 30.72122609 | 3.576326835 | 0.433280474 | 8.254068778 | 1.53E-16       | 1.80E-15    |
| Ttc39c        | 4611.813679 | 3.57522654  | 0.306961741 | 11.64714053 | 2.37E-31       | 9.28E-30    |
| Gm5869        | 7.397523213 | 3.570199922 | 0.890343478 | 4.009913038 | 6.07E-05       | 0.000189898 |
| Ppp1r3c       | 535.4175193 | 3.565862322 | 0.326779774 | 10.91212678 | 1.01E-27       | 2.93E-26    |
| Hpcal4        | 2.424569633 | 3.565724168 | 1.715255769 | 2.078829428 | 0.037633031    | 0.065761369 |
| Adtrp         | 1650.671138 | 3.558695657 | 0.347866136 | 10.2300721  | 1.45E-24       | 3.30E-23    |
| LT629151.6    | 4.772018988 | 3.557136288 | 1.058332624 | 3.361075911 | 0.000776395    | 0.001997605 |
| LT629154.4    | 4.772018988 | 3.557136288 | 1.058332624 | 3.361075911 | 0.000776395    | 0.001997605 |
| Cyp2b10       | 78.81175601 | 3.556137924 | 0.669348683 | 5.312833225 | 1.08E-07       | 4.94E-07    |



|             |             |             |             |             |                |             |
|-------------|-------------|-------------|-------------|-------------|----------------|-------------|
| Rspo1       | 3.736343018 | 3.545987759 | 1.173178772 | 3.022546814 | 0.002506573    | 0.005806775 |
| Ftl2-ps     | 4.640074297 | 3.538657321 | 3.356890012 | 1.054147532 | 0.291815377    | 0.381069977 |
| Rs1         | 3.936061794 | 3.535657444 | 1.210030211 | 2.92195799  | 0.003478385    | 0.007825218 |
| Hal         | 4820.895814 | 3.533250165 | 0.466573005 | 7.57277024  | 3.65E-14       | 3.45E-13    |
| Olfr542-ps1 | 1.109043154 | 3.525861802 | 1.926587713 | 1.830107073 | 0.067233929 NA |             |
| Zfp993      | 23.42545616 | 3.525405242 | 0.656702362 | 5.368345606 | 7.95E-08       | 3.70E-07    |
| Gm13194     | 28.89400608 | 3.522149027 | 0.507101205 | 6.94565304  | 3.77E-12       | 2.89E-11    |
| Nhlh2       | 1.097690237 | 3.520399578 | 1.986680983 | 1.772000441 | 0.076394484 NA |             |
| Ugt1a5      | 551.5554296 | 3.516768967 | 0.439876113 | 7.994907803 | 1.30E-15       | 1.41E-14    |
| Clec2h      | 394.0490186 | 3.516292646 | 0.792084517 | 4.43928971  | 9.03E-06       | 3.21E-05    |
| Ugt2b5      | 11970.84164 | 3.513731451 | 0.435957961 | 8.059794209 | 7.64E-16       | 8.47E-15    |
| Dkk4        | 1.101717377 | 3.513549258 | 2.352949861 | 1.493252923 | 0.135370993 NA |             |
| Gm8274      | 3.464727912 | 3.507018033 | 1.311378061 | 2.67429976  | 0.007488548    | 0.015672081 |
| Gm7646      | 1.335194714 | 3.502641712 | 2.274944456 | 1.539660321 | 0.123643174 NA |             |
| Hsd17b6     | 2500.540574 | 3.494174104 | 0.890667308 | 3.923096845 | 8.74E-05       | 0.000267127 |
| Gm47364     | 0.956007187 | 3.493399948 | 2.966414816 | 1.177650519 | 0.238935961 NA |             |
| Ccdc151     | 21.76718186 | 3.485110147 | 0.55530711  | 6.276004909 | 3.47E-10       | 2.13E-09    |
| Srd5a1      | 1076.398217 | 3.484874701 | 0.35111369  | 9.925203146 | 3.23E-23       | 6.60E-22    |
| Cyp2c23     | 4685.063147 | 3.480814243 | 0.277111253 | 12.56107145 | 3.46E-36       | 1.94E-34    |
| Gm21885     | 8.232931103 | 3.47400342  | 1.135880513 | 3.058423294 | 0.00222505     | 0.005215545 |
| Gm21887     | 203.5428093 | 3.473913224 | 1.271206526 | 2.732768558 | 0.006280445    | 0.013350252 |
| Olfr93      | 2.217447707 | 3.46678518  | 1.767358888 | 1.961562648 | 0.049813424    | 0.084089441 |
| Nr1d1       | 1960.306769 | 3.463503712 | 0.302080415 | 11.46550238 | 1.97E-30       | 7.18E-29    |
| Gm20691     | 0.612421511 | 3.462006503 | 3.540376723 | 0.977863876 | 0.328141654 NA |             |
| Ly6g6c      | 5.358191894 | 3.46164446  | 0.958120276 | 3.612953973 | 0.000302728    | 0.000839856 |
| Neb         | 315.6173297 | 3.458530442 | 0.328429743 | 10.53050315 | 6.25E-26       | 1.57E-24    |
| Sh3rf2      | 1.756543946 | 3.454453966 | 2.311584154 | 1.49440978  | 0.135068547    | 0.199156598 |
| Gm47628     | 15.32146793 | 3.450375693 | 0.735827095 | 4.68911204  | 2.74E-06       | 1.04E-05    |
| Htra4       | 13.26066492 | 3.445846803 | 0.60467237  | 5.698700607 | 1.21E-08       | 6.20E-08    |
| Otc         | 6393.577038 | 3.445425525 | 0.455349685 | 7.566548607 | 3.83E-14       | 3.62E-13    |
| Klkb1       | 3387.383733 | 3.445239253 | 0.349641064 | 9.853645943 | 6.61E-23       | 1.31E-21    |
| Ccl28       | 16.65709716 | 3.444633763 | 0.674858788 | 5.104228947 | 3.32E-07       | 1.43E-06    |
| Cphx2       | 6.229959797 | 3.444393743 | 1.523906609 | 2.260239389 | 0.023806397    | 0.043880578 |
| Gm17571     | 5.986330735 | 3.442595991 | 0.922220706 | 3.73294155  | 0.000189257    | 0.00054593  |
| Fam47e      | 131.0515566 | 3.438823223 | 0.447000136 | 7.693114491 | 1.44E-14       | 1.41E-13    |
| Gm7441      | 0.621667994 | 3.432493182 | 3.284828129 | 1.044953662 | 0.296044387 NA |             |
| Gapdh-ps15  | 0.60233341  | 3.432424307 | 3.541145499 | 0.969297733 | 0.33239666 NA  |             |
| Rpl34-ps2   | 0.60233341  | 3.432424307 | 3.541145499 | 0.969297733 | 0.33239666 NA  |             |
| Slc17a3     | 811.3023061 | 3.432350516 | 0.346335145 | 9.910488614 | 3.75E-23       | 7.60E-22    |
| Gm11340     | 0.600864239 | 3.43225409  | 3.277547322 | 1.047201994 | 0.295006426 NA |             |
| Rpl6l       | 0.600307666 | 3.431584217 | 3.236771557 | 1.060187337 | 0.289059381 NA |             |
| Gm17521     | 0.599889498 | 3.43011116  | 3.279071779 | 1.046061627 | 0.29553258 NA  |             |
| Olfr1346    | 0.62049934  | 3.429929411 | 3.286538088 | 1.043629898 | 0.296656654 NA |             |
| Fem1al      | 0.620494581 | 3.42991991  | 3.286544996 | 1.043624814 | 0.296659008 NA |             |
| Neurod2     | 0.620493802 | 3.429918355 | 3.286546127 | 1.043623982 | 0.296659393 NA |             |
| Foxd3       | 0.620486852 | 3.429904479 | 3.286556217 | 1.043616555 | 0.29666283 NA  |             |
| Gm14409     | 0.620451003 | 3.429832896 | 3.28660827  | 1.043578247 | 0.296680562 NA |             |
| Spata19     | 0.620403717 | 3.429738472 | 3.286676935 | 1.043527715 | 0.296703952 NA |             |
| C8g         | 3861.882518 | 3.429608942 | 0.362158646 | 9.469907679 | 2.80E-21       | 4.96E-20    |
| Gm14682     | 0.620282685 | 3.429496746 | 3.286852731 | 1.043398359 | 0.296763833 NA |             |
| Slc6a16     | 22.15400533 | 3.428507121 | 0.57601667  | 5.952097045 | 2.65E-09       | 1.46E-08    |
| Gm45299     | 5.676545755 | 3.428168436 | 0.866474159 | 3.956457791 | 7.61E-05       | 0.000234296 |
| Slc47a1     | 1384.447719 | 3.425927175 | 0.251979989 | 13.59602875 | 4.23E-42       | 3.75E-40    |
| Unc93a2     | 25.70735937 | 3.425554236 | 0.511498497 | 6.697095415 | 2.13E-11       | 1.50E-10    |
| Retsat      | 3735.156642 | 3.421828448 | 0.289283798 | 11.82862115 | 2.78E-32       | 1.17E-30    |
| Zfp990      | 9.882370947 | 3.421609822 | 1.24503289  | 2.748208379 | 0.005992191    | 0.012804572 |
| Caps2       | 2.204265836 | 3.421349449 | 1.666745974 | 2.052711992 | 0.040100518    | 0.06957395  |
| Hoxc5       | 0.711771261 | 3.419981467 | 2.640876374 | 1.295017631 | 0.195314147 NA |             |
| Wfdc1       | 24.87698412 | 3.415021781 | 0.516886325 | 6.606910685 | 3.92E-11       | 2.68E-10    |
| Hsd3b7      | 5931.678994 | 3.408511718 | 0.258073946 | 13.20750031 | 7.94E-40       | 5.79E-38    |
| Cyp4v3      | 4424.520379 | 3.406902438 | 0.222319482 | 15.32435398 | 5.26E-53       | 8.62E-51    |
| Gm14542     | 1.792933933 | 3.402365464 | 1.545962648 | 2.200807031 | 0.027749688    | 0.050225786 |
| AL731810.1  | 10.84740473 | 3.401911244 | 0.644280926 | 5.280167558 | 1.29E-07       | 5.85E-07    |
| Gm46501     | 5.042986711 | 3.399846957 | 1.136634104 | 2.991153392 | 0.002779258    | 0.006380393 |
| Gm11703     | 1.388315793 | 3.398440838 | 1.985952948 | 1.711239354 | 0.087036937 NA |             |
| Keg1        | 2578.443922 | 3.397822827 | 0.449898272 | 7.552424716 | 4.27E-14       | 4.01E-13    |

|               |             |             |             |             |             |    |             |
|---------------|-------------|-------------|-------------|-------------|-------------|----|-------------|
| Tbr1          | 0.754653101 | 3.395312024 | 3.188388373 | 1.064899136 | 0.286921576 | NA |             |
| Lcn12         | 1.25123631  | 3.394580333 | 2.283651874 | 1.486470145 | 0.137154808 | NA |             |
| Lin28b        | 1.390696083 | 3.385974895 | 2.380964028 | 1.422102499 | 0.154996497 | NA |             |
| Apoa2         | 80794.84495 | 3.374815361 | 0.306671883 | 11.0046455  | 3.63E-28    |    | 1.10E-26    |
| Pclo          | 11.6412906  | 3.369983179 | 0.776321405 | 4.340963881 | 1.42E-05    |    | 4.89E-05    |
| Gpcpd1        | 1371.550723 | 3.36374607  | 0.243567313 | 13.8103345  | 2.21E-43    |    | 2.08E-41    |
| Prkcz2        | 1.623680559 | 3.363008589 | 1.676838906 | 2.005564504 | 0.044902732 | NA |             |
| Ccdc38        | 4.066819519 | 3.361724129 | 1.115819486 | 3.012784926 | 0.002588623 |    | 0.005978086 |
| Lpin1         | 1767.803172 | 3.35722397  | 0.304462702 | 11.02671671 | 2.84E-28    |    | 8.62E-27    |
| Gm29475       | 1.611934461 | 3.351989605 | 2.173587104 | 1.542146436 | 0.123038013 | NA |             |
| Hsd3b3        | 2918.094265 | 3.347594396 | 0.348733042 | 9.599303746 | 8.05E-22    |    | 1.49E-20    |
| Mapk10        | 2.410165177 | 3.347098432 | 1.377611901 | 2.42963815  | 0.015113904 |    | 0.029303063 |
| Ar            | 66.89688706 | 3.343330192 | 0.582172396 | 5.742852483 | 9.31E-09    |    | 4.85E-08    |
| Orm3          | 68.47181164 | 3.340839131 | 0.597435945 | 5.591962047 | 2.25E-08    |    | 1.12E-07    |
| Sox2          | 2.476945477 | 3.333906809 | 2.232851861 | 1.493115987 | 0.135406829 |    | 0.199517339 |
| Snhg11        | 411.8194432 | 3.333084677 | 0.298490497 | 11.16646831 | 5.95E-29    |    | 1.90E-27    |
| Tafa5         | 29.65321016 | 3.328790276 | 0.533358517 | 6.241187058 | 4.34E-10    |    | 2.63E-09    |
| Cyp27a1       | 5661.613918 | 3.317929173 | 0.340930251 | 9.731988192 | 2.20E-22    |    | 4.23E-21    |
| Igf1          | 9529.113719 | 3.317155457 | 0.332155248 | 9.986762138 | 1.74E-23    |    | 3.65E-22    |
| F830016B08Rik | 334.2626802 | 3.311740458 | 0.184797653 | 17.92090106 | 8.10E-72    |    | 3.95E-69    |
| Fam177a2      | 12.56764618 | 3.311551333 | 3.355649291 | 0.986858591 | 0.323711966 |    | 0.415060289 |
| Apol7a        | 979.7446501 | 3.302562949 | 0.233538187 | 14.14142581 | 2.11E-45    |    | 2.29E-43    |
| Kirrel3       | 2.586994051 | 3.302389035 | 1.259521498 | 2.621939396 | 0.008743098 |    | 0.017997142 |
| Ptgd          | 34.18252588 | 3.299687995 | 0.596321529 | 5.533404105 | 3.14E-08    |    | 1.53E-07    |
| Nap115        | 1.637592354 | 3.296782992 | 1.63944911  | 2.010909014 | 0.044335068 |    | 0.07596987  |
| Mpped1        | 0.561252318 | 3.295968087 | 3.38585051  | 0.973453517 | 0.330327952 | NA |             |
| LT629153.4    | 25.90455542 | 3.290534636 | 0.534686174 | 6.154141995 | 7.55E-10    |    | 4.46E-09    |
| Hsd3b2        | 997.3825331 | 3.287512325 | 0.290356369 | 11.32233586 | 1.02E-29    |    | 3.51E-28    |
| Them5         | 1.335415357 | 3.286427279 | 1.720918343 | 1.90969391  | 0.056172636 | NA |             |
| Zfand4        | 304.2320465 | 3.27963292  | 0.330226605 | 9.931461816 | 3.04E-23    |    | 6.21E-22    |
| Fn3k          | 208.2277423 | 3.267936772 | 0.354319044 | 9.2231474   | 2.89E-20    |    | 4.70E-19    |
| Vmn1r-ps107   | 6.643462581 | 3.265239943 | 0.959915559 | 3.401590809 | 0.000669949 |    | 0.001744773 |
| Gm16588       | 4.767849785 | 3.264079837 | 1.004523397 | 3.249381594 | 0.001156562 |    | 0.002883878 |
| Ephx2         | 8481.958775 | 3.262424709 | 0.275020975 | 11.86245779 | 1.85E-32    |    | 7.90E-31    |
| Rpl34-ps1     | 2.677462582 | 3.252874118 | 1.425912315 | 2.28125817  | 0.022533174 |    | 0.041804936 |
| Mettl7b       | 6434.693034 | 3.250246961 | 0.663085452 | 4.90170151  | 9.50E-07    |    | 3.84E-06    |
| AI593442      | 0.988637067 | 3.245091096 | 2.454779795 | 1.321947941 | 0.186185487 | NA |             |
| Hoxa11        | 0.541549878 | 3.245066053 | 2.800142718 | 1.158893092 | 0.246499765 | NA |             |
| Rec114        | 11.93117687 | 3.24490826  | 0.852527132 | 3.80622286  | 0.000141105 |    | 0.000416259 |
| Mfsd4b1       | 349.6941829 | 3.243792155 | 0.437019132 | 7.422540389 | 1.15E-13    |    | 1.03E-12    |
| Col19a1       | 0.536632136 | 3.240622155 | 3.426014366 | 0.945886914 | 0.344206269 | NA |             |
| Olfr1291-ps1  | 0.5366321   | 3.240622044 | 3.42601444  | 0.945886861 | 0.344206296 | NA |             |
| Kcnip1        | 0.536630411 | 3.240616892 | 3.426017831 | 0.945884421 | 0.344207541 | NA |             |
| Gm6704        | 0.536601261 | 3.240527892 | 3.426076397 | 0.945842275 | 0.34422904  | NA |             |
| Rpl7a-ps7     | 0.536597184 | 3.240515437 | 3.426084589 | 0.945836378 | 0.344232048 | NA |             |
| Gm12275       | 0.534624256 | 3.235568091 | 3.429761285 | 0.943379968 | 0.345486586 | NA |             |
| Chrnd         | 0.534616799 | 3.235545064 | 3.429776393 | 3.429776393 | 0.345492143 | NA |             |
| Cdh19         | 0.534615772 | 3.235541894 | 3.429778472 | 0.943367602 | 0.345492908 | NA |             |
| Zyg11a        | 73.83979008 | 3.235493931 | 0.472993757 | 6.840457998 | 7.89E-12    |    | 5.86E-11    |
| Gm3571        | 0.535639657 | 3.234486573 | 2.806802448 | 1.152374146 | 0.24916736  | NA |             |
| Serpnb9e      | 0.535632321 | 3.234473383 | 2.806810799 | 1.152366018 | 0.249170699 | NA |             |
| Serpina3j     | 0.53563147  | 3.234471854 | 2.806811769 | 1.152365075 | 0.249171086 | NA |             |
| Gm17304       | 0.532949669 | 3.227308826 | 3.433885106 | 0.939841819 | 0.347298704 | NA |             |
| LT629154.5    | 13.9041844  | 3.226078555 | 0.660120383 | 4.887106412 | 1.02E-06    |    | 4.12E-06    |
| Ctrb1         | 4.087911875 | 3.225481327 | 1.78143609  | 1.810607377 | 0.070201649 |    | 0.113440542 |
| Lmod2         | 0.798579535 | 3.223178905 | 2.541213546 | 1.268362082 | 0.204668676 | NA |             |
| Slc17a7       | 0.534420247 | 3.22299259  | 3.432922238 | 0.938646155 | 0.347912447 | NA |             |
| Gm13437       | 0.796739514 | 3.221111043 | 2.483809428 | 1.296843069 | 0.194685188 | NA |             |
| Mgst1         | 49063.0315  | 3.215915689 | 0.254963895 | 12.61321998 | 1.79E-36    |    | 1.03E-34    |
| Cdh15         | 2.032302585 | 3.208215089 | 1.455974196 | 2.20348348  | 0.02756069  |    | 0.049936725 |
| 2010106E10Rik | 2.959465751 | 3.20577469  | 2.172062602 | 1.475912659 | 0.139967341 |    | 0.205137829 |
| Gm8479        | 3.58535951  | 3.201170079 | 1.196014814 | 2.676530458 | 0.00743888  |    | 0.015573871 |
| Pax1          | 2.944354513 | 3.188322801 | 1.34146287  | 2.376750689 | 0.017465889 |    | 0.033328685 |
| Gm5111        | 12.09134979 | 3.184536191 | 0.586603374 | 5.428772372 | 5.67E-08    |    | 2.68E-07    |
| Hoxa13        | 0.851004275 | 3.184286757 | 2.54673359  | 1.250341524 | 0.211174816 | NA |             |
| Slc2a5        | 39.3546722  | 3.184043803 | 0.611993058 | 5.202744967 | 1.96E-07    |    | 8.75E-07    |

|            |             |             |             |             |                |             |
|------------|-------------|-------------|-------------|-------------|----------------|-------------|
| Gm21833    | 8.198967046 | 3.182750498 | 0.768694195 | 4.140463813 | 3.47E-05       | 0.000112679 |
| H2-M6-ps   | 1.100023311 | 3.181468777 | 2.066926924 | 1.53922654  | 0.123749001 NA |             |
| Rpl10-ps5  | 3.956853013 | 3.176563695 | 1.964361543 | 1.617097274 | 0.105857285    | 0.161912672 |
| Arrdc3     | 3719.381308 | 3.175313564 | 0.296895002 | 10.69507249 | 1.07E-26       | 2.87E-25    |
| Olfr122    | 2.300865298 | 3.169880744 | 1.51258182  | 2.095675554 | 0.036110982    | 0.063341909 |
| Sgk2       | 740.7144896 | 3.169575582 | 0.221473697 | 14.31129574 | 1.86E-46       | 2.14E-44    |
| Xlr3a      | 99.31828844 | 3.169300371 | 0.619932636 | 5.112330255 | 3.18E-07       | 1.37E-06    |
| Duox2      | 2.943786745 | 3.168416158 | 1.823850925 | 1.737212244 | 0.082349715    | 0.130499339 |
| Cyp3a25    | 11029.35164 | 3.156927589 | 0.401999893 | 7.853055799 | 4.06E-15       | 4.21E-14    |
| Lrrtm3     | 2.88372874  | 3.156060473 | 1.316823787 | 2.396721948 | 0.016542471    | 0.031758565 |
| Ighv1-56   | 1.63887465  | 3.153911064 | 1.689144922 | 1.867164281 | 0.06187865     | 0.101540786 |
| Gm10319    | 702.8027755 | 3.150126732 | 0.47494854  | 6.632564298 | 3.30E-11       | 2.28E-10    |
| Timd4      | 19.56848531 | 3.147346232 | 0.892029132 | 3.528299826 | 0.000418238    | 0.001133471 |
| Nr0b2      | 831.1548431 | 3.145931054 | 0.301102214 | 10.44805023 | 1.50E-25       | 3.67E-24    |
| Tymp       | 605.7495315 | 3.143450383 | 0.395243518 | 7.953199078 | 1.82E-15       | 1.95E-14    |
| Htr3b      | 0.863194061 | 3.138911997 | 2.423444707 | 1.295227404 | 0.195241794 NA |             |
| Sntg2      | 84.98020731 | 3.134597918 | 0.342370062 | 9.155584157 | 5.41E-20       | 8.58E-19    |
| Gm47036    | 17.34773758 | 3.132447942 | 1.917707392 | 1.633433732 | 0.102377808    | 0.157521378 |
| Gm43960    | 26.26994849 | 3.132334456 | 0.517007375 | 6.058587567 | 1.37E-09       | 7.86E-09    |
| Cyp3a41b   | 0.866674683 | 3.124686374 | 3.035647562 | 1.029331077 | 0.303324125 NA |             |
| Abhd6      | 400.7312156 | 3.121614257 | 0.237782141 | 13.12804337 | 2.27E-39       | 1.56E-37    |
| Chrna4     | 67.21843754 | 3.121095134 | 1.135005154 | 2.749851068 | 0.005962236    | 0.012745353 |
| Smok3c     | 0.872139671 | 3.118689577 | 3.033452153 | 1.028099149 | 0.303903191 NA |             |
| L3mbtl1    | 2.487420265 | 3.116526013 | 1.901764248 | 1.63875518  | 0.101264257    | 0.156019255 |
| mt-Nd2     | 159719.6932 | 3.111195676 | 0.282436352 | 11.01556386 | 3.22E-28       | 9.72E-27    |
| Haoa       | 5661.585911 | 3.108800014 | 0.348546761 | 8.919320124 | 4.69E-19       | 6.92E-18    |
| Gm13453    | 0.7639057   | 3.094526817 | 3.192439768 | 0.969329742 | 0.332380694 NA |             |
| Sult1b1    | 293.5782965 | 3.094177785 | 0.22586573  | 13.69919104 | 1.03E-42       | 9.36E-41    |
| Pigr       | 10393.1797  | 3.085118332 | 0.27186783  | 11.34786093 | 7.60E-30       | 2.66E-28    |
| Col22a1    | 5.292087433 | 3.075964201 | 1.062566102 | 2.894845031 | 0.003793458    | 0.008466989 |
| Gm47579    | 0.736403116 | 3.073408689 | 2.612221773 | 1.176549679 | 0.239375293 NA |             |
| Gm4795     | 1.170241698 | 3.066908426 | 1.73101866  | 1.771736202 | 0.076438357 NA |             |
| Ube2u      | 49.7222784  | 3.066287392 | 0.436297917 | 7.02796707  | 2.10E-12       | 1.66E-11    |
| Aqp8       | 1167.556524 | 3.064405766 | 0.718737788 | 4.263593505 | 2.01E-05       | 6.78E-05    |
| Trim72     | 8.102639578 | 3.061658807 | 0.741395087 | 4.129591445 | 3.63E-05       | 0.000117805 |
| Hmgcs1     | 7511.492016 | 3.059228116 | 0.271437951 | 11.27045095 | 1.84E-29       | 6.16E-28    |
| Pglyrp2    | 991.2507432 | 3.056074663 | 0.435704578 | 7.014098123 | 2.31E-12       | 1.82E-11    |
| Trim10     | 1.74605405  | 3.055132975 | 1.461384694 | 2.090574088 | 0.036566261    | 0.064061413 |
| Gm15920    | 3.735643516 | 3.051130045 | 1.218619129 | 2.503760176 | 0.01228813     | 0.024387431 |
| Abcb11     | 8309.892609 | 3.039473898 | 0.2577864   | 11.79066816 | 4.36E-32       | 1.80E-30    |
| Enho       | 185.2060925 | 3.038807608 | 0.295758343 | 10.27463021 | 9.17E-25       | 2.13E-23    |
| Bmp10      | 17.55400976 | 3.037136365 | 0.793405826 | 3.82797336  | 0.000129203    | 0.000383003 |
| Gm48111    | 54.20804008 | 3.03563703  | 1.299995793 | 2.335112964 | 0.01953752     | 0.036816143 |
| Il1rap     | 1930.693353 | 3.032715115 | 0.292956581 | 10.35209758 | 4.09E-25       | 9.72E-24    |
| Acpp       | 61.4280648  | 3.031325032 | 0.345351048 | 8.777517965 | 1.67E-18       | 2.35E-17    |
| Gm4353     | 1.437283857 | 3.030933148 | 2.802004767 | 1.081701638 | 0.279385125 NA |             |
| Slc25a47   | 7102.244    | 3.029705732 | 0.347367292 | 8.721908474 | 2.74E-18       | 3.79E-17    |
| Rpl14-ps1  | 67.56408825 | 3.029456579 | 3.188550691 | 0.950104569 | 0.342059122    | 0.434435217 |
| Gm14912    | 1.207940221 | 3.029434358 | 2.355477407 | 1.286123293 | 0.198400036 NA |             |
| Gm48862    | 15.99592316 | 3.028988972 | 0.516137889 | 5.868565424 | 4.40E-09       | 2.37E-08    |
| Lrrc74b    | 6.717394911 | 3.028908641 | 0.954222947 | 3.174214841 | 0.001502424    | 0.003649142 |
| Ap3m1-ps   | 0.451750057 | 3.022523948 | 3.569057939 | 0.846868838 | 0.397068234 NA |             |
| Gm18555    | 0.451750057 | 3.022523948 | 3.569057939 | 0.846868838 | 0.397068234 NA |             |
| Gm9364     | 0.451750057 | 3.022523948 | 3.569057939 | 0.846868838 | 0.397068234 NA |             |
| Rpl30-ps8  | 0.451750057 | 3.022523948 | 3.569057939 | 0.846868838 | 0.397068234 NA |             |
| Chrna5     | 12.08529688 | 3.020990294 | 0.720570594 | 4.192497337 | 2.76E-05       | 9.09E-05    |
| LT629148.8 | 0.450382391 | 3.019827866 | 3.569473578 | 0.84601491  | 0.397544427 NA |             |
| Gm10310    | 0.450718531 | 3.019558534 | 3.569288971 | 0.845983208 | 0.397562112 NA |             |
| Gm4734     | 0.450595499 | 3.019205302 | 3.5693164   | 0.845877743 | 0.39762095 NA  |             |
| H2-Ea-ps   | 0.450586359 | 3.019179053 | 3.56931844  | 0.845869906 | 0.397625322 NA |             |
| Gm6076     | 0.450463316 | 3.018825598 | 3.569345931 | 0.845764366 | 0.397684208 NA |             |
| Gm6969     | 3.692489713 | 3.018202086 | 1.115579678 | 2.705501136 | 0.006820141    | 0.014377368 |
| Gm5160     | 0.450000439 | 3.017494324 | 3.569449856 | 0.845366778 | 0.397906087 NA |             |
| Gm6657     | 0.44999538  | 3.017479758 | 3.569450996 | 0.845362427 | 0.397908516 NA |             |
| Gm6044     | 0.449972465 | 3.017413786 | 3.569456162 | 0.845342721 | 0.397919515 NA |             |
| Gm9645     | 0.449862371 | 3.017096732 | 3.569481012 | 0.845248013 | 0.39797238 NA  |             |



|            |             |             |             |             |             |    |             |
|------------|-------------|-------------|-------------|-------------|-------------|----|-------------|
| Gm13882    | 0.449828095 | 3.016997992 | 3.569488757 | 0.845218517 | 0.397988846 | NA |             |
| Apol11b    | 0.449774082 | 3.016842368 | 3.569500973 | 0.845172026 | 0.398014799 | NA |             |
| Matr3-ps2  | 0.449772419 | 3.016837578 | 3.569501349 | 0.845170595 | 0.398015598 | NA |             |
| Gm6494     | 0.449765814 | 3.016818543 | 3.569502844 | 0.845164908 | 0.398018772 | NA |             |
| Pck1       | 26170.57493 | 3.016643966 | 0.409208028 | 7.371908067 | 1.68E-13    |    | 1.48E-12    |
| Olfr1170   | 7.913609765 | 3.01580206  | 0.829081559 | 3.637521577 | 0.000275274 |    | 0.000770713 |
| AC125149.1 | 0.448713619 | 3.013790147 | 3.569739756 | 0.844260465 | 0.398523873 | NA |             |
| Capn13     | 0.448713619 | 3.013790147 | 3.569739756 | 0.844260465 | 0.398523873 | NA |             |
| Cyb5r2     | 0.448713619 | 3.013790147 | 3.569739756 | 0.844260465 | 0.398523873 | NA |             |
| Gm10250    | 0.448713619 | 3.013790147 | 3.569739756 | 0.844260465 | 0.398523873 | NA |             |
| Gm12105    | 0.448713619 | 3.013790147 | 3.569739756 | 0.844260465 | 0.398523873 | NA |             |
| Gm18485    | 0.448713619 | 3.013790147 | 3.569739756 | 0.844260465 | 0.398523873 | NA |             |
| Gm8744     | 0.448713619 | 3.013790147 | 3.569739756 | 0.844260465 | 0.398523873 | NA |             |
| LO018689.7 | 0.448713619 | 3.013790147 | 3.569739756 | 0.844260465 | 0.398523873 | NA |             |
| Asic5      | 55.52260489 | 3.013351504 | 0.632247762 | 4.766092794 | 1.88E-06    |    | 7.29E-06    |
| Msmo1      | 3287.336257 | 3.012634555 | 0.246692547 | 12.21210203 | 2.68E-34    |    | 1.30E-32    |
| Foxn4      | 0.470940944 | 3.011114538 | 3.569949426 | 0.843461399 | 0.398970445 | NA |             |
| Gm13607    | 0.470940944 | 3.011114538 | 3.569949426 | 0.843461399 | 0.398970445 | NA |             |
| Gm16106    | 0.470940944 | 3.011114538 | 3.569949426 | 0.843461399 | 0.398970445 | NA |             |
| Gm17709    | 0.470940944 | 3.011114538 | 3.569949426 | 0.843461399 | 0.398970445 | NA |             |
| Gm19007    | 0.470940944 | 3.011114538 | 3.569949426 | 0.843461399 | 0.398970445 | NA |             |
| Gm29803    | 0.470940944 | 3.011114538 | 3.569949426 | 0.843461399 | 0.398970445 | NA |             |
| Gm37025    | 0.470940944 | 3.011114538 | 3.569949426 | 0.843461399 | 0.398970445 | NA |             |
| Gm49419    | 0.470940944 | 3.011114538 | 3.569949426 | 0.843461399 | 0.398970445 | NA |             |
| Gm6166     | 0.470940944 | 3.011114538 | 3.569949426 | 0.843461399 | 0.398970445 | NA |             |
| Gm6443     | 0.470940944 | 3.011114538 | 3.569949426 | 0.843461399 | 0.398970445 | NA |             |
| Gm7114     | 0.470940944 | 3.011114538 | 3.569949426 | 0.843461399 | 0.398970445 | NA |             |
| Gm8116     | 0.470940944 | 3.011114538 | 3.569949426 | 0.843461399 | 0.398970445 | NA |             |
| Lamp3      | 0.470940944 | 3.011114538 | 3.569949426 | 0.843461399 | 0.398970445 | NA |             |
| Soga3      | 0.470940944 | 3.011114538 | 3.569949426 | 0.843461399 | 0.398970445 | NA |             |
| Gm11042    | 0.470940944 | 3.011114538 | 3.569949426 | 0.843461399 | 0.398970445 | NA |             |
| Gm5883     | 0.470940944 | 3.011114538 | 3.569949426 | 0.843461399 | 0.398970445 | NA |             |
| Otx2       | 0.470940944 | 3.011114538 | 3.569949426 | 0.843461399 | 0.398970445 | NA |             |
| Zfp986     | 0.470940944 | 3.011114538 | 3.569949426 | 0.843461399 | 0.398970445 | NA |             |
| Igfbp2     | 5957.248397 | 3.005684468 | 0.432743775 | 6.945644612 | 3.77E-12    |    | 2.89E-11    |
| Arhgef37   | 57.35294092 | 3.004420693 | 0.589151844 | 5.099569364 | 3.40E-07    |    | 1.46E-06    |
| Klk1b4     | 23.35161842 | 3.003521242 | 0.953913966 | 3.148629069 | 0.001640383 |    | 0.003956599 |
| Gm48119    | 58.83289925 | 3.002433958 | 0.29990592  | 10.01125272 | 1.36E-23    |    | 2.88E-22    |
| Gm45213    | 1.323542753 | 3.00099698  | 1.94466294  | 1.543196468 | 0.122783114 | NA |             |
| Olfr620    | 2.390318741 | 3.000815939 | 1.482988717 | 2.023492091 | 0.043022438 |    | 0.074003282 |
| Epha5      | 33.37533335 | 2.999176723 | 0.392862766 | 7.63415875  | 2.27E-14    |    | 2.19E-13    |
| Tnfrsf15   | 2.350244559 | 2.998448661 | 1.490967166 | 2.011076252 | 0.044317403 |    | 0.075947235 |
| Gm18857    | 1.687580883 | 2.997041137 | 1.460909332 | 2.051490172 | 0.040219236 |    | 0.069751529 |
| Gm18359    | 1.209574004 | 2.993233656 | 1.958728942 | 1.528196981 | 0.126463638 | NA |             |
| Rps18-ps3  | 0.823489685 | 2.99168023  | 2.149324471 | 1.391916516 | 0.16394768  | NA |             |
| Grid1      | 8.318612529 | 2.988509361 | 0.920856929 | 3.245356868 | 0.001173035 |    | 0.002920681 |
| Olfr750    | 1.324126812 | 2.987548599 | 1.713523266 | 1.74351213  | 0.081244197 | NA |             |
| Olfr867    | 1.321122902 | 2.986820111 | 1.71355079  | 1.743058991 | 0.081323311 | NA |             |
| Gm29797    | 1.99992418  | 2.986257513 | 1.552846384 | 1.92308624  | 0.05446922  |    | 0.090806891 |
| Kcnc4      | 0.815572961 | 2.98341785  | 2.151878356 | 1.386424954 | 0.165617181 | NA |             |
| Sdr42e1    | 1236.504687 | 2.983179346 | 0.220698554 | 13.51698639 | 1.24E-41    |    | 1.04E-39    |
| Gm49421    | 9.226854573 | 2.98048222  | 0.680024875 | 4.382901755 | 1.17E-05    |    | 4.09E-05    |
| Tmprss11g  | 24.19573643 | 2.98019999  | 0.448359864 | 6.646892887 | 2.99E-11    |    | 2.08E-10    |
| Gm7357     | 0.811023961 | 2.980145899 | 2.543793735 | 1.171535985 | 0.241383402 | NA |             |
| Pou2f3-rs1 | 0.800551643 | 2.977962663 | 2.548451787 | 1.168537964 | 0.242589835 | NA |             |
| H2bc13     | 1.41460211  | 2.974915163 | 2.35678421  | 1.26227728  | 0.206849029 | NA |             |
| Mpp4       | 53.41120597 | 2.97468394  | 0.396477323 | 7.502784559 | 6.25E-14    |    | 5.77E-13    |
| Gm10566    | 1.975995353 | 2.973775075 | 1.734794563 | 1.714194371 | 0.086493034 |    | 0.136354101 |
| P2ry4      | 34.94777989 | 2.969231157 | 0.388754124 | 7.637812622 | 2.21E-14    |    | 2.13E-13    |
| Olfr1137   | 0.836115333 | 2.968196896 | 3.110017242 | 0.954398856 | 0.339881785 | NA |             |
| Zap70      | 95.04231715 | 2.966762541 | 0.313878739 | 9.45193852  | 3.33E-21    |    | 5.86E-20    |
| Cyp4f39    | 1.33097302  | 2.966458542 | 1.949269782 | 1.521830672 | 0.128051514 | NA |             |
| Apoc4      | 9539.703169 | 2.965781245 | 0.236198678 | 12.55629906 | 3.67E-36    |    | 2.05E-34    |
| Cmb1       | 1808.351892 | 2.964459244 | 0.214672311 | 13.80922968 | 2.24E-43    |    | 2.10E-41    |
| Gm45753    | 3.959966589 | 2.960478076 | 1.50462765  | 1.967581864 | 0.049116168 |    | 0.083109919 |
| Olfr1246   | 13.45607199 | 2.958458143 | 0.756656567 | 3.909908766 | 9.23E-05    |    | 0.000280982 |

|            |             |             |             |             |                |             |
|------------|-------------|-------------|-------------|-------------|----------------|-------------|
| Fam50b     | 3.739239197 | 2.958075974 | 1.158325646 | 2.553751602 | 0.010656925    | 0.021480168 |
| Lrrc24     | 2.89410651  | 2.95516675  | 1.18267081  | 2.498722998 | 0.01246417     | 0.024705169 |
| Ppp1r3g    | 50.29574756 | 2.954835134 | 0.620431589 | 4.76254786  | 1.91E-06       | 7.40E-06    |
| Slco5a1    | 27.13817574 | 2.94586985  | 0.600514456 | 4.905576911 | 9.32E-07       | 3.78E-06    |
| Gm47331    | 36.28908529 | 2.942326112 | 0.409802143 | 7.179869997 | 6.98E-13       | 5.82E-12    |
| Gm14917    | 1.404511825 | 2.939788781 | 1.888751837 | 1.556471699 | 0.119595967 NA |             |
| Gm36028    | 42.90856532 | 2.938648658 | 0.427617564 | 6.872142091 | 6.32E-12       | 4.73E-11    |
| Masp2      | 3362.489466 | 2.938562603 | 0.327869582 | 8.962595982 | 3.17E-19       | 4.75E-18    |
| Ass1       | 29835.57412 | 2.936689052 | 0.391852303 | 7.494377427 | 6.66E-14       | 6.12E-13    |
| Gm12537    | 3.788380378 | 2.934917496 | 2.034685013 | 1.442443168 | 0.149177393    | 0.216809565 |
| Cadm2      | 1.753688142 | 2.933261108 | 1.594150636 | 1.840015016 | 0.065766033    | 0.107054266 |
| Sv2b       | 2.135197459 | 2.931748224 | 1.370043614 | 2.139894084 | 0.032363327    | 0.057573829 |
| mt-Nd3     | 13431.69258 | 2.930155842 | 0.321312189 | 9.11934232  | 7.56E-20       | 1.19E-18    |
| Slc16a10   | 660.7843505 | 2.925427936 | 0.239806058 | 12.1991411  | 3.14E-34       | 1.52E-32    |
| Hpd        | 19279.06203 | 2.922535811 | 0.202535177 | 14.42976895 | 3.36E-47       | 4.04E-45    |
| Gm16053    | 0.922826691 | 2.922388135 | 2.119733946 | 1.378657987 | 0.168000229 NA |             |
| Lama3      | 106.1821611 | 2.921341486 | 0.303498283 | 9.62556183  | 6.24E-22       | 1.16E-20    |
| Asgr1      | 4761.583721 | 2.916803639 | 0.308074767 | 9.467843356 | 2.86E-21       | 5.06E-20    |
| Sez6       | 9.37296227  | 2.91534487  | 0.685110138 | 4.255293722 | 2.09E-05       | 7.01E-05    |
| Colec10    | 105.2271125 | 2.914902634 | 0.687768763 | 4.238201542 | 2.25E-05       | 7.54E-05    |
| Gm7652     | 30.61703513 | 2.911789453 | 0.804986693 | 3.61718955  | 0.000297819    | 0.000827583 |
| Hao1       | 3195.940224 | 2.910160934 | 0.222735522 | 13.06554476 | 5.18E-39       | 3.48E-37    |
| Gira3      | 1.306456405 | 2.910051996 | 2.383636363 | 1.220845613 | 0.222144448 NA |             |
| Aldh2      | 21526.42911 | 2.909125073 | 0.173249629 | 16.79152272 | 2.82E-63       | 8.27E-61    |
| Tbata      | 0.648074991 | 2.90821093  | 2.646123695 | 1.099045723 | 0.271748123 NA |             |
| Angptl6    | 109.5269038 | 2.906961898 | 0.451885724 | 6.432958033 | 1.25E-10       | 8.08E-10    |
| Gys2       | 1497.522295 | 2.906846276 | 0.479996804 | 6.055970066 | 1.40E-09       | 7.98E-09    |
| Chchd10    | 6401.921313 | 2.901084566 | 0.253026622 | 11.46553097 | 1.97E-30       | 7.18E-29    |
| Fdps       | 3483.51458  | 2.895124337 | 0.320730177 | 9.026666473 | 1.77E-19       | 2.69E-18    |
| Rmdn2      | 402.210455  | 2.893396447 | 0.258401618 | 11.19728456 | 4.20E-29       | 1.36E-27    |
| Duoxa2     | 0.645872083 | 2.892052397 | 3.311481908 | 0.873340842 | 0.382477325 NA |             |
| Car8       | 777.0806708 | 2.891587112 | 0.257205597 | 11.242318   | 2.53E-29       | 8.30E-28    |
| Tdo2       | 14272.50876 | 2.891257367 | 0.406884542 | 7.105842251 | 1.20E-12       | 9.69E-12    |
| Acsn1      | 4726.086247 | 2.889488984 | 0.245662816 | 11.76201199 | 6.13E-32       | 2.49E-30    |
| mt-Atp6    | 209440.6535 | 2.88670073  | 0.236685349 | 12.19636424 | 3.25E-34       | 1.57E-32    |
| Gm10974    | 1.655206416 | 2.883865394 | 1.557692888 | 1.851369686 | 0.064116387    | 0.104718928 |
| Olfr178    | 1.903498331 | 2.8826087   | 1.668529718 | 1.727634018 | 0.08405386     | 0.132951401 |
| Serpinb1c  | 2.972345317 | 2.88218902  | 1.510918644 | 1.907573933 | 0.056446307    | 0.093660529 |
| Gm5605     | 0.668734297 | 2.881604731 | 2.709924324 | 1.063352473 | 0.287622137 NA |             |
| Olfr922    | 1.625241504 | 2.881392837 | 1.667794859 | 1.727666219 | 0.084048083 NA |             |
| Olfr1129   | 329.9343695 | 2.878069536 | 0.439593361 | 6.547117835 | 5.87E-11       | 3.95E-10    |
| Fgf10      | 0.667668236 | 2.877422209 | 2.711093494 | 1.061351154 | 0.288530346 NA |             |
| Foxb1      | 0.666799257 | 2.87593457  | 2.711793587 | 1.060528568 | 0.2889042 NA   |             |
| Zic3       | 2.024906019 | 2.87356842  | 2.20803499  | 1.301414349 | 0.193116665    | 0.26926089  |
| Prodh      | 1912.936746 | 2.868078754 | 0.47285213  | 6.065487644 | 1.32E-09       | 7.56E-09    |
| Me1        | 1972.952757 | 2.867850247 | 0.304928244 | 9.405000373 | 5.20E-21       | 9.00E-20    |
| Gm29228    | 0.848150559 | 2.864768142 | 2.496593534 | 1.147470785 | 0.251187101 NA |             |
| Mbl1       | 2385.975194 | 2.8622788   | 0.386655817 | 7.40265289  | 1.33E-13       | 1.19E-12    |
| Gm4152     | 0.84754783  | 2.859901495 | 2.553982525 | 1.119781152 | 0.262807033 NA |             |
| CR974586.4 | 0.729670941 | 2.854478038 | 2.597237873 | 1.099043745 | 0.271748986 NA |             |
| mt-Atp8    | 31561.45714 | 2.852618697 | 0.216737152 | 13.16165076 | 1.46E-39       | 1.04E-37    |
| Sc5d       | 6952.900462 | 2.851702628 | 0.341646397 | 8.346941906 | 7.01E-17       | 8.53E-16    |
| Nefl       | 1.08018455  | 2.847376416 | 3.003159675 | 0.948126881 | 0.343064865 NA |             |
| Cyp2c40    | 132.389906  | 2.844749034 | 0.351294922 | 8.097893984 | 5.59E-16       | 6.26E-15    |
| Lgals12    | 3.155664549 | 2.843053422 | 1.076050567 | 2.64211879  | 0.008238915    | 0.017062321 |
| Gm15368    | 3.0364096   | 2.841121929 | 1.382708925 | 2.054750554 | 0.039903104    | 0.069280795 |
| Sugct      | 387.2110235 | 2.83951693  | 0.218292482 | 13.00785489 | 1.10E-38       | 7.24E-37    |
| Agmat      | 1885.385956 | 2.838964422 | 0.251757091 | 11.27660163 | 1.71E-29       | 5.79E-28    |
| Nat8f1     | 2152.104041 | 2.838857718 | 0.412953116 | 6.874527903 | 6.22E-12       | 4.66E-11    |
| Gcdh       | 6477.853238 | 2.837860328 | 0.216999255 | 13.07774229 | 4.41E-39       | 2.99E-37    |
| Adra1b     | 936.9244392 | 2.835474295 | 0.448498872 | 6.322143643 | 2.58E-10       | 1.61E-09    |
| Gm37317    | 4.622375177 | 2.832953702 | 1.053867353 | 2.688150168 | 0.007184908    | 0.015094061 |
| Olfr596    | 12.24119946 | 2.832796626 | 0.79838358  | 3.548164937 | 0.000387925    | 0.001057459 |
| Ghr        | 6086.112244 | 2.832238295 | 0.21946664  | 12.90509706 | 4.21E-38       | 2.68E-36    |
| Ttr        | 83453.094   | 2.829972862 | 0.254398266 | 11.124183   | 9.57E-29       | 3.01E-27    |
| Zfp879     | 5.122650841 | 2.829124374 | 1.141015662 | 2.479479001 | 0.013157448    | 0.025877731 |

|               |             |             |             |             |                |             |
|---------------|-------------|-------------|-------------|-------------|----------------|-------------|
| Cth           | 4816.681795 | 2.829093748 | 0.348722393 | 8.11273896  | 4.95E-16       | 5.57E-15    |
| Pank1         | 1645.811698 | 2.827553476 | 0.272144688 | 10.38989039 | 2.76E-25       | 6.62E-24    |
| Gm8258        | 1.021786137 | 2.823914063 | 2.109384637 | 1.338738329 | 0.180655874 NA |             |
| Qdpr          | 4071.285777 | 2.822857185 | 0.213252887 | 13.23713465 | 5.36E-40       | 3.95E-38    |
| Gm36245       | 3.046040233 | 2.819893899 | 1.332934844 | 2.115552693 | 0.034382869    | 0.060697851 |
| Decr2         | 2075.708154 | 2.819850036 | 0.201950235 | 13.96309361 | 2.62E-44       | 2.63E-42    |
| Gm3336        | 0.713786801 | 2.819566455 | 2.568439121 | 1.097774299 | 0.272303057 NA |             |
| Gm16425       | 0.713516431 | 2.818086832 | 2.568688167 | 1.097091842 | 0.272601246 NA |             |
| Csn1s1        | 0.729042905 | 2.816222757 | 2.602777698 | 1.082006642 | 0.279249577 NA |             |
| Insig1        | 5555.389423 | 2.815687452 | 0.229443454 | 12.27181427 | 1.28E-34       | 6.38E-33    |
| Vmn1r181      | 11.41990402 | 2.810261265 | 0.687073593 | 4.090189602 | 4.31E-05       | 0.000138017 |
| Ugt2b36       | 7840.753314 | 2.809548075 | 0.364494564 | 7.708065768 | 1.28E-14       | 1.26E-13    |
| Gm5157        | 1.277971088 | 2.808490176 | 1.713496158 | 1.639040836 | 0.101204755 NA |             |
| Gm17430       | 1.047301794 | 2.807500912 | 2.129913897 | 1.31812883  | 0.187460525 NA |             |
| Adipoq        | 0.73230899  | 2.804126916 | 3.188932832 | 0.879330818 | 0.379221931 NA |             |
| Cdo1          | 19641.84146 | 2.802258054 | 0.37478936  | 7.476887969 | 7.61E-14       | 6.95E-13    |
| Gm49057       | 0.759867303 | 2.801601929 | 2.622354901 | 1.068353459 | 0.285361103 NA |             |
| Tcf5          | 0.860232661 | 2.801171538 | 3.09454469  | 0.905196667 | 0.365361207 NA |             |
| Bco2          | 319.5722815 | 2.801115287 | 0.325366772 | 8.609100643 | 7.36E-18       | 9.84E-17    |
| Dmrt2         | 1.292921091 | 2.800673528 | 1.668353907 | 1.67870469  | 0.093209611 NA |             |
| Gm15798       | 0.713610327 | 2.800197493 | 3.20591503  | 0.873447196 | 0.382419376 NA |             |
| Gm15276       | 0.713311931 | 2.799157014 | 3.206275593 | 0.873024459 | 0.382649746 NA |             |
| Crygn         | 21.93036791 | 2.796148906 | 0.639911627 | 4.369586033 | 1.24E-05       | 4.32E-05    |
| Ldhd          | 2312.954184 | 2.793479116 | 0.249321216 | 11.20433778 | 3.88E-29       | 1.26E-27    |
| Pex11a        | 1046.721165 | 2.793061727 | 0.150070753 | 18.61163267 | 2.59E-77       | 2.10E-74    |
| Atp11c        | 2122.581641 | 2.792517956 | 0.27023733  | 10.33357588 | 4.97E-25       | 1.18E-23    |
| Scd1          | 25754.16673 | 2.790253247 | 0.492610122 | 5.664222317 | 1.48E-08       | 7.49E-08    |
| Gm19202       | 0.750493648 | 2.789744296 | 2.628130649 | 1.061493764 | 0.288465565 NA |             |
| H2-Q10        | 30103.63522 | 2.787357598 | 0.24016363  | 11.60607707 | 3.84E-31       | 1.48E-29    |
| Dynlrb2       | 1.566028701 | 2.78701672  | 1.766682153 | 1.577542805 | 0.114670681 NA |             |
| CTO09635.3    | 24.81996932 | 2.786117223 | 0.440371506 | 6.326742725 | 2.50E-10       | 1.56E-09    |
| Gm48494       | 2.661896618 | 2.785962609 | 2.579018568 | 1.080241392 | 0.2800347      | 0.367629106 |
| Gm8941        | 137.4459273 | 2.784073611 | 0.538059222 | 5.174288438 | 2.29E-07       | 1.01E-06    |
| Aacs          | 661.4360227 | 2.78139096  | 0.379102943 | 7.336769629 | 2.19E-13       | 1.91E-12    |
| Gnmt          | 11568.67462 | 2.78014985  | 0.388838985 | 7.149874256 | 8.69E-13       | 7.16E-12    |
| Slc25a25      | 2494.701975 | 2.777431048 | 0.447542038 | 6.205966838 | 5.44E-10       | 3.26E-09    |
| Snurf         | 2.928247378 | 2.775035501 | 1.306932185 | 2.123320194 | 0.03372703     | 0.059657439 |
| Gm15653       | 2.384264354 | 2.772582403 | 1.198240706 | 2.313877662 | 0.020674434    | 0.038708055 |
| Gm48672       | 1.153968684 | 2.770884669 | 2.034690262 | 1.361821365 | 0.173254267 NA |             |
| Nsdhl         | 1523.627601 | 2.767941861 | 0.357499561 | 7.742504213 | 9.75E-15       | 9.72E-14    |
| Cd200r2       | 10.60944664 | 2.766292858 | 0.613276566 | 4.510677584 | 6.46E-06       | 2.35E-05    |
| Mgll          | 1329.516078 | 2.759554956 | 0.242909007 | 11.36044723 | 6.58E-30       | 2.32E-28    |
| Cyp3a57       | 2.467982843 | 2.7590671   | 1.520061851 | 1.815101865 | 0.069508257    | 0.112479996 |
| Gm14001       | 1.165852653 | 2.756532993 | 1.81022506  | 1.522757062 | 0.127819496 NA |             |
| mt-Co1        | 512300.8363 | 2.75587693  | 0.179126279 | 15.38510676 | 2.06E-53       | 3.55E-51    |
| 1300017J02Rik | 6612.997111 | 2.754597122 | 0.277912094 | 9.911756909 | 3.70E-23       | 7.51E-22    |
| Gm10012       | 6.579446564 | 2.750801957 | 0.897586691 | 3.064664379 | 0.002179144    | 0.005118496 |
| Eif1-ps2      | 0.386153601 | 2.749530644 | 3.592374002 | 0.765379841 | 0.444045393 NA |             |
| Gm37097       | 0.386150877 | 2.749523331 | 3.592374185 | 0.765377767 | 0.444046628 NA |             |
| Gm15428       | 0.386148005 | 2.749515618 | 3.592374378 | 0.765375579 | 0.444047931 NA |             |
| Hmgb1-ps9     | 0.386115423 | 2.749428131 | 3.592376562 | 0.76535076  | 0.444062706 NA |             |
| Mesp1         | 0.386084795 | 2.749345884 | 3.592378616 | 0.765327427 | 0.444076596 NA |             |
| Gm5049        | 0.386077949 | 2.749327501 | 3.592379075 | 0.765322212 | 0.4440797 NA   |             |
| Myod1         | 0.386074095 | 2.749317149 | 3.592379333 | 0.765319276 | 0.444081449 NA |             |
| Gm8473        | 0.386073812 | 2.74931639  | 3.592379352 | 0.76531906  | 0.444081577 NA |             |
| Olfra441      | 0.386069193 | 2.749303986 | 3.592379662 | 0.765315541 | 0.444083672 NA |             |
| Otx1          | 0.386066926 | 2.749297899 | 3.592379814 | 0.765313815 | 0.4440847 NA   |             |
| Sgcz          | 0.386065837 | 2.749294973 | 3.592379887 | 0.765312985 | 0.444085194 NA |             |
| Slc6a14       | 0.386064341 | 2.749290957 | 3.592379987 | 0.765311845 | 0.444085872 NA |             |
| Lhx1          | 0.386063164 | 2.749287796 | 3.592380066 | 0.765310949 | 0.444086406 NA |             |
| Kcnj3         | 0.386062633 | 2.74928637  | 3.592380102 | 0.765310544 | 0.444086647 NA |             |
| Zdbf2         | 0.386056667 | 2.749270348 | 3.592380502 | 0.765305999 | 0.444089353 NA |             |
| Olfra924      | 0.385037208 | 2.745693835 | 3.592713266 | 0.764239624 | 0.444724458 NA |             |
| Ptprn2        | 0.38503687  | 2.745692923 | 3.592713289 | 0.764239365 | 0.444724612 NA |             |
| B3gnt4        | 0.385030078 | 2.745674632 | 3.59271375  | 0.764234176 | 0.444727704 NA |             |
| Gm18283       | 0.385029425 | 2.745672875 | 3.592713794 | 0.764233678 | 0.444728001 NA |             |

|           |             |             |             |             |             |    |             |
|-----------|-------------|-------------|-------------|-------------|-------------|----|-------------|
| Gm14828   | 0.38502707  | 2.745666531 | 3.592713954 | 0.764231878 | 0.444729073 | NA |             |
| Gm18040   | 0.385015373 | 2.745635032 | 3.592714746 | 0.764222941 | 0.444734397 | NA |             |
| Tsx       | 0.385014764 | 2.745633391 | 3.592714788 | 0.764222476 | 0.444734675 | NA |             |
| Gm8534    | 0.385012707 | 2.745627852 | 3.592714927 | 0.764220905 | 0.444735611 | NA |             |
| Lcn5      | 0.385011539 | 2.745624705 | 3.592715006 | 0.764220012 | 0.444736143 | NA |             |
| Gm6444    | 0.384939992 | 2.745432011 | 3.592719857 | 0.764165346 | 0.444768715 | NA |             |
| Gm49461   | 4.022686462 | 2.74540541  | 1.018448787 | 2.695673505 | 0.007024648 |    | 0.014781067 |
| Gm45900   | 1.190444125 | 2.742074874 | 2.058619346 | 1.331997039 | 0.182861161 | NA |             |
| Scp2-ps2  | 22.92305408 | 2.740067711 | 0.457967399 | 5.983106484 | 2.19E-09    |    | 1.22E-08    |
| Cebpe     | 85.84949942 | 2.738323254 | 1.1867687   | 2.307377381 | 0.021033791 |    | 0.039314118 |
| Fam25c    | 419.5627607 | 2.737113479 | 0.414137169 | 6.609195409 | 3.86E-11    |    | 2.64E-10    |
| Gm47283   | 1348.148186 | 2.736619707 | 1.041841754 | 2.62671341  | 0.008621391 |    | 0.017776666 |
| Kcnn2     | 343.9370876 | 2.73590752  | 0.386607665 | 7.07670274  | 1.48E-12    |    | 1.19E-11    |
| Dach2     | 1.534144951 | 2.735494251 | 1.771530477 | 1.544141795 | 0.122553986 | NA |             |
| Gm44578   | 6.388095161 | 2.734572308 | 0.893244548 | 3.061392666 | 0.0022031   |    | 0.005168356 |
| Lonp2     | 4682.620806 | 2.733716101 | 0.25392501  | 10.7658403  | 4.99E-27    |    | 1.38E-25    |
| Hyal1     | 610.0114951 | 2.731674661 | 0.257926994 | 10.59088318 | 3.28E-26    |    | 8.42E-25    |
| Ugt2a2    | 11.04455699 | 2.730789081 | 1.040940287 | 2.623386869 | 0.008706035 |    | 0.017933844 |
| Rpl3-ps1  | 17.13826401 | 2.72997509  | 2.324645359 | 1.174361964 | 0.240250073 |    | 0.323695202 |
| Trh       | 3.829821446 | 2.72906682  | 1.627196458 | 1.677158776 | 0.093511438 |    | 0.145806268 |
| Slco2b1   | 1350.424104 | 2.728471667 | 0.245292055 | 11.12335931 | 9.66E-29    |    | 3.03E-27    |
| Adra1a    | 40.52442015 | 2.728120377 | 0.579488665 | 4.707806282 | 2.50E-06    |    | 9.56E-06    |
| Acs1      | 9809.835025 | 2.725499179 | 0.216348649 | 12.59771758 | 2.17E-36    |    | 1.24E-34    |
| Gm20763   | 1.423066297 | 2.725106603 | 1.813368348 | 1.502787123 | 0.132893948 | NA |             |
| Gm48418   | 11.15671969 | 2.718868948 | 0.763664098 | 3.560294316 | 0.000370439 |    | 0.001013847 |
| Ush2a     | 0.935815582 | 2.718271421 | 2.490646012 | 1.091392116 | 0.27510038  | NA |             |
| Kcnk3     | 3.402236506 | 2.715656906 | 1.102089757 | 2.464097765 | 0.013735864 |    | 0.026900518 |
| Alpk3     | 2.828145856 | 2.714365076 | 1.419501118 | 1.912196504 | 0.055850994 |    | 0.092756722 |
| Gm14863   | 1.469774792 | 2.713207719 | 1.719282758 | 1.57810442  | 0.114541623 | NA |             |
| Treh      | 22.21858218 | 2.708518401 | 0.496409592 | 5.456216892 | 4.86E-08    |    | 2.32E-07    |
| Tedc2     | 1333.186583 | 2.707807384 | 0.386149295 | 7.012332848 | 2.34E-12    |    | 1.84E-11    |
| Hgd       | 5953.253187 | 2.706433149 | 0.28934472  | 9.353663508 | 8.47E-21    |    | 1.45E-19    |
| Nkx3-1    | 0.910320449 | 2.699495164 | 2.09500014  | 1.288541759 | 0.197557442 | NA |             |
| Gm21778   | 0.583198539 | 2.699116491 | 2.795781934 | 0.965424541 | 0.334332214 | NA |             |
| Acox1     | 23042.9886  | 2.696300442 | 0.252579991 | 10.6750358  | 1.33E-26    |    | 3.55E-25    |
| Dmgdh     | 5498.952905 | 2.694811205 | 0.331353239 | 8.132744424 | 4.20E-16    |    | 4.77E-15    |
| Ces1b     | 984.1493436 | 2.694281762 | 0.394002761 | 6.838230665 | 8.02E-12    |    | 5.94E-11    |
| Gm13535   | 0.581148064 | 2.693797651 | 2.798097825 | 0.962724615 | 0.335685741 | NA |             |
| Gm47932   | 9.352851208 | 2.692803868 | 0.908986537 | 2.96242437  | 0.003052268 |    | 0.006950983 |
| Muc6      | 0.580490452 | 2.690562997 | 2.799004022 | 0.961257282 | 0.336422821 | NA |             |
| Fam184a   | 8.528565485 | 2.688883089 | 0.75521876  | 3.560402931 | 0.000370286 |    | 0.00101359  |
| Gm29216   | 104800.3493 | 2.687122525 | 0.202571879 | 13.26503235 | 3.69E-40    |    | 2.79E-38    |
| Lor       | 5.644400595 | 2.684437861 | 0.93273666  | 2.878023322 | 0.004001756 |    | 0.008883064 |
| Krt79     | 1.404992178 | 2.678976988 | 2.406653593 | 1.11315438  | 0.265642132 | NA |             |
| Gm4952    | 1243.337542 | 2.678471643 | 0.382286967 | 7.006442474 | 2.44E-12    |    | 1.92E-11    |
| Kif5a     | 89.16348306 | 2.67372859  | 0.364585175 | 7.33361851  | 2.24E-13    |    | 1.96E-12    |
| Olfir1349 | 3.138256264 | 2.673231632 | 1.152756697 | 2.31899033  | 0.020395561 |    | 0.038247005 |
| Etnppl    | 1539.435535 | 2.67249383  | 0.293563055 | 9.103644978 | 8.73E-20    |    | 1.37E-18    |
| Gm17040   | 8.030741341 | 2.670423537 | 0.69963898  | 3.816859286 | 0.000135161 |    | 0.000399623 |
| Got1      | 1615.963835 | 2.670048351 | 0.214757636 | 12.43284477 | 1.73E-35    |    | 9.12E-34    |
| Ric3      | 5.660755385 | 2.669357549 | 0.927329084 | 2.878543978 | 0.003995156 |    | 0.008869568 |
| Gm13313   | 0.973961644 | 2.668866402 | 2.102575976 | 1.269331731 | 0.204322774 | NA |             |
| Gstp1     | 31653.48255 | 2.662869223 | 0.245351243 | 10.85329419 | 1.92E-27    |    | 5.45E-26    |
| Gm35570   | 24.44138664 | 2.661067681 | 0.741426017 | 3.589120993 | 0.000331795 |    | 0.000914098 |
| Gabbr2    | 0.946449229 | 2.659214565 | 2.122443887 | 1.252902176 | 0.21024131  | NA |             |
| Fam214a   | 1168.518334 | 2.657731133 | 0.251753489 | 10.55687905 | 4.72E-26    |    | 1.20E-24    |
| Galnt5    | 0.659880949 | 2.657130217 | 2.696759771 | 0.985304752 | 0.324474399 | NA |             |
| Gm8430    | 19.61605097 | 2.656425918 | 3.343618952 | 0.794476271 | NA          | NA |             |
| Zfp600    | 3.869289246 | 2.652576814 | 1.750636499 | 1.515207078 | 0.129719971 |    | 0.192647408 |
| Gstt3     | 669.727748  | 2.652392475 | 0.322500799 | 8.224452403 | 1.96E-16    |    | 2.29E-15    |
| Prss53    | 116.4542101 | 2.650003552 | 0.296907496 | 8.925350786 | 4.44E-19    |    | 6.57E-18    |
| Xirp1     | 5.976006548 | 2.645236709 | 0.994359815 | 2.660240959 | 0.007808477 |    | 0.016261777 |
| Shisa6    | 7.773638508 | 2.641361654 | 1.335148778 | 1.978327582 | 0.047891763 |    | 0.081361114 |
| Myl3      | 1.935247288 | 2.63695106  | 1.37174835  | 1.922328581 | 0.054564426 |    | 0.090913529 |
| Olfir273  | 5.188575905 | 2.635244401 | 0.8085562   | 3.259197567 | 0.001117278 |    | 0.002792049 |
| Tmem243   | 932.0451855 | 2.634958656 | 0.19812474  | 13.29949334 | 2.33E-40    |    | 1.78E-38    |

|               |             |             |             |             |                |             |
|---------------|-------------|-------------|-------------|-------------|----------------|-------------|
| Gm14822       | 5.499349101 | 2.632679819 | 1.354225854 | 1.944047819 | 0.051889685    | 0.087188581 |
| Syt3          | 44.61501627 | 2.631557776 | 0.460236133 | 5.717842623 | 1.08E-08       | 5.57E-08    |
| Dpf3          | 16.38629719 | 2.628125905 | 0.618849655 | 4.246792228 | 2.17E-05       | 7.27E-05    |
| mt-Nd4        | 190464.2807 | 2.625350657 | 0.218291224 | 12.02682639 | 2.57E-33       | 1.15E-31    |
| Ankrd34c      | 1.369366494 | 2.623316648 | 1.935325633 | 1.355491088 | 0.175261146 NA |             |
| D7Ert443e     | 1.805179071 | 2.622602625 | 1.55418295  | 1.687447817 | 0.091517276    | 0.14321587  |
| Gm16089       | 0.672980973 | 2.616953264 | 2.69058379  | 0.972633996 | 0.33073524 NA  |             |
| Hist1h2al     | 1.119881381 | 2.615832295 | 2.152145433 | 1.215453312 | 0.224193245 NA |             |
| Tpd52l1       | 92.94446975 | 2.615169653 | 0.281300719 | 9.296704467 | 1.45E-20       | 2.41E-19    |
| Acot12        | 1156.692328 | 2.614447951 | 0.435121525 | 6.008619113 | 1.87E-09       | 1.05E-08    |
| mt-Nd5        | 75497.91415 | 2.613566232 | 0.257959507 | 10.13169185 | 4.00E-24       | 8.79E-23    |
| Hibadh        | 4631.886203 | 2.613139696 | 0.210747766 | 12.39937079 | 2.63E-35       | 1.36E-33    |
| Gm4821        | 1.087732    | 2.612156169 | 2.385059906 | 1.095216167 | 0.273421945 NA |             |
| Hdhd3         | 273.5055449 | 2.611853226 | 0.307796789 | 8.485641556 | 2.15E-17       | 2.76E-16    |
| Gm19154       | 0.66513296  | 2.610892285 | 2.311771717 | 1.129390184 | 0.258733272 NA |             |
| 9130409123Rik | 242.1335546 | 2.609503753 | 0.816938861 | 3.194246077 | 0.001401966    | 0.003434503 |
| Inca1         | 370.5678618 | 2.60946125  | 0.418469583 | 6.235725025 | 4.50E-10       | 2.72E-09    |
| Albfm1        | 735.4657705 | 2.609052834 | 0.16683297  | 15.63871234 | 3.97E-55       | 7.27E-53    |
| Prmt8         | 0.664992723 | 2.608772995 | 2.312027631 | 1.128348537 | 0.259172753 NA |             |
| 4930455H04Rik | 0.649895182 | 2.608316889 | 2.706825908 | 0.963607183 | 0.335242904 NA |             |
| Rgs21         | 0.673255046 | 2.608293866 | 2.691347999 | 0.969140322 | 0.332475182 NA |             |
| Gm28906       | 0.649859696 | 2.60806164  | 2.70686017  | 0.963500689 | 0.335296318 NA |             |
| Khdrbs3       | 169.1443344 | 2.604147148 | 0.363138469 | 7.171223577 | 7.43E-13       | 6.18E-12    |
| Ucp3          | 0.57574411  | 2.603589356 | 2.855425007 | 0.911804495 | 0.361871644 NA |             |
| C1rl          | 1662.196225 | 2.60346734  | 0.220541412 | 11.80489106 | 3.68E-32       | 1.54E-30    |
| Sec14l2       | 7771.655782 | 2.601572676 | 0.425401908 | 6.115564197 | 9.62E-10       | 5.63E-09    |
| Dpyd          | 3776.362066 | 2.601002154 | 0.227884513 | 11.41368546 | 3.57E-30       | 1.28E-28    |
| MsrA          | 1969.937104 | 2.599058332 | 0.231262479 | 11.23856468 | 2.64E-29       | 8.63E-28    |
| Depp1         | 3458.394804 | 2.597703115 | 0.253585982 | 10.24387507 | 1.26E-24       | 2.88E-23    |
| Akr1c12       | 907.3890529 | 2.597277004 | 0.368852476 | 7.04150632  | 1.90E-12       | 1.51E-11    |
| Ntm           | 16.19648728 | 2.597070994 | 0.674078885 | 3.852770132 | 0.000116789    | 0.000348812 |
| Cyp1a1        | 16.50092017 | 2.597013104 | 1.054621439 | 2.462507406 | 0.013796932    | 0.027007705 |
| Gm28661       | 34728.08731 | 2.596256082 | 0.390502225 | 6.648505213 | 2.96E-11       | 2.06E-10    |
| Gm21973       | 2.752233155 | 2.595709408 | 1.453577488 | 1.785738586 | 0.074141595    | 0.118995096 |
| Necab1        | 558.3061708 | 2.59350478  | 0.326919502 | 7.93316019  | 2.14E-15       | 2.27E-14    |
| Fam83c        | 6.923359974 | 2.592798313 | 0.888325004 | 2.918749672 | 0.003514383    | 0.007894997 |
| Gm9644        | 1.325544014 | 2.592042332 | 1.925492029 | 1.346171417 | 0.178247241 NA |             |
| Hist1h2bp     | 1.558315535 | 2.591759368 | 2.057018903 | 1.259958946 | 0.207684173 NA |             |
| Gpat2         | 25.5316657  | 2.58995361  | 0.606287692 | 4.271822839 | 1.94E-05       | 6.55E-05    |
| Aldh8a1       | 3740.522145 | 2.586634817 | 0.406322646 | 6.365962714 | 1.94E-10       | 1.23E-09    |
| Ltb4r2        | 20.94759516 | 2.586616326 | 0.763482097 | 3.387920076 | 0.000704248    | 0.001826566 |
| Pate9         | 1.060173    | 2.584565187 | 2.461366138 | 1.050053118 | 0.293693692 NA |             |
| Gngt1         | 18.47232789 | 2.582800382 | 0.443811062 | 5.819594419 | 5.90E-09       | 3.13E-08    |
| Slc19a2       | 1427.556963 | 2.582697455 | 0.237010867 | 10.89695797 | 1.19E-27       | 3.45E-26    |
| Gm48515       | 9.734181194 | 2.57995831  | 0.833559771 | 3.095108954 | 0.001967406    | 0.004654502 |
| Gm11353       | 0.890285533 | 2.575504245 | 2.517201687 | 1.023161655 | 0.306231419 NA |             |
| Olfr291       | 16.74465137 | 2.569857035 | 0.592272352 | 4.338978557 | 1.43E-05       | 4.93E-05    |
| Kmo           | 3485.462086 | 2.56935409  | 0.400216393 | 6.419912173 | 1.36E-10       | 8.78E-10    |
| Tm7sf2        | 1465.173793 | 2.568333402 | 0.158509978 | 16.20297616 | 4.80E-59       | 1.06E-56    |
| Abcd3         | 5554.590565 | 2.567855839 | 0.258388375 | 9.937969678 | 2.85E-23       | 5.84E-22    |
| Gm48407       | 25.70728293 | 2.56697888  | 0.642132068 | 3.997587115 | 6.40E-05       | 0.000199365 |
| mt-Nd1        | 123247.2778 | 2.566272359 | 0.197132068 | 13.01803601 | 9.66E-39       | 6.38E-37    |
| Cela1         | 260.2867096 | 2.564920024 | 0.332074033 | 7.723940353 | 1.13E-14       | 1.12E-13    |
| Angptl4       | 2392.275553 | 2.559370316 | 0.436698551 | 5.860725461 | 4.61E-09       | 2.48E-08    |
| Tmem86b       | 831.8337973 | 2.558845857 | 0.283963616 | 9.011175067 | 2.04E-19       | 3.09E-18    |
| Odf3b         | 169.9874615 | 2.557281652 | 0.3341495   | 7.653106335 | 1.96E-14       | 1.90E-13    |
| Gpx1          | 19139.22829 | 2.556656355 | 0.264383041 | 9.670273666 | 4.03E-22       | 7.58E-21    |
| AcsM5         | 1951.401975 | 2.556461712 | 0.193683762 | 13.19915352 | 8.87E-40       | 6.44E-38    |
| Olfr18        | 2.607100775 | 2.551152754 | 1.237729269 | 2.061155713 | 0.039288187    | 0.068338436 |
| Fabp2         | 670.6474369 | 2.550640541 | 0.412598056 | 6.181901496 | 6.33E-10       | 3.76E-09    |
| Gm21049       | 17.32879103 | 2.547973296 | 0.747808866 | 3.407252056 | 0.000656205    | 0.001712905 |
| Aurkc         | 0.620663616 | 2.543607323 | 3.387756334 | 0.750823575 | 0.452758839 NA |             |
| Gm48497       | 0.84840476  | 2.540702499 | 1.92191441  | 1.321964436 | 0.186179994 NA |             |
| mt-Nd4l       | 23669.57553 | 2.536347237 | 0.219664162 | 11.54647718 | 7.69E-31       | 2.89E-29    |
| Gm48177       | 2.575461238 | 2.536243753 | 1.37833155  | 1.840082492 | 0.065756127    | 0.107048363 |
| Cfhr3         | 116.863636  | 2.534913074 | 0.215322403 | 11.77263972 | 5.40E-32       | 2.20E-30    |



|               |             |             |             |             |                |             |
|---------------|-------------|-------------|-------------|-------------|----------------|-------------|
| Gm49051       | 2.207216187 | 2.534356737 | 1.898808128 | 1.334709231 | 0.181971531    | 0.256257283 |
| Ablim3        | 449.3875071 | 2.53347381  | 0.382447172 | 6.624375852 | 3.49E-11       | 2.40E-10    |
| Olfr1162      | 0.694225395 | 2.531034436 | 3.294156337 | 0.768340715 | 0.442284792 NA |             |
| Grm2          | 1.285079078 | 2.529802657 | 1.593120612 | 1.587954257 | 0.112296683 NA |             |
| Gm47935       | 0.510240908 | 2.529005936 | 3.557271464 | 0.71093982  | 0.477121529 NA |             |
| Zfp36         | 5798.834519 | 2.52893295  | 0.235102919 | 10.75670587 | 5.51E-27       | 1.51E-25    |
| Atp6v1g3      | 0.691132876 | 2.525809797 | 3.297871601 | 0.765890885 | 0.44374123 NA  |             |
| 1700113H08Rik | 0.314524743 | 2.523186257 | 3.613249991 | 0.698314886 | 0.484980292 NA |             |
| Slc27a2       | 17402.39788 | 2.522338275 | 0.293842315 | 8.583985852 | 9.16E-18       | 1.21E-16    |
| Apoc1         | 65206.36798 | 2.52094407  | 0.191838149 | 13.14099456 | 1.92E-39       | 1.33E-37    |
| Pou5f1        | 6.42366945  | 2.520561487 | 1.812054443 | 1.390996555 | 0.164226472    | 0.234817822 |
| Aknad1        | 1.614417906 | 2.519242815 | 2.036541117 | 1.237020355 | 0.216079526 NA |             |
| Rdh7          | 14385.301   | 2.518782078 | 0.170759441 | 14.75047043 | 3.06E-49       | 4.20E-47    |
| Slc38a3       | 14900.16674 | 2.518632601 | 0.197880102 | 12.72807407 | 4.13E-37       | 2.47E-35    |
| Tat           | 14389.46397 | 2.517356217 | 0.334283203 | 7.530609364 | 5.05E-14       | 4.72E-13    |
| Hmgcs2        | 25885.45258 | 2.514806595 | 0.243601226 | 10.32345622 | 5.52E-25       | 1.30E-23    |
| Gm45860       | 0.500508838 | 2.514298419 | 2.901187926 | 0.866644451 | 0.38613685 NA  |             |
| Tmem25        | 770.33729   | 2.512456278 | 0.338144514 | 7.430125798 | 1.08E-13       | 9.77E-13    |
| Cd1d1         | 3179.631873 | 2.511914698 | 0.274207256 | 9.160642696 | 5.16E-20       | 8.22E-19    |
| Gm7656        | 6.728137378 | 2.510664717 | 0.887841776 | 2.827828995 | 0.004686483    | 0.010252171 |
| Hint2         | 998.9397311 | 2.510014346 | 0.203593857 | 12.32853671 | 6.36E-35       | 3.23E-33    |
| Cphx1         | 55.97461104 | 2.507551578 | 0.424930956 | 5.901080029 | 3.61E-09       | 1.97E-08    |
| Gm18800       | 0.306284936 | 2.504146021 | 3.612474196 | 0.693194161 | 0.488187712 NA |             |
| Gm6451        | 2.254254526 | 2.502995935 | 1.282474998 | 1.951691798 | 0.050974807    | 0.085812038 |
| A4gnt         | 0.712448163 | 2.501843059 | 2.71604798  | 0.921133602 | 0.356980679 NA |             |
| mt-Cytb       | 232280.8512 | 2.501617296 | 0.205422923 | 12.17788777 | 4.08E-34       | 1.96E-32    |
| Cep85l        | 635.0302704 | 2.501428232 | 0.187506087 | 13.34051751 | 1.35E-40       | 1.05E-38    |
| Cib2          | 74.71938562 | 2.499570368 | 0.423910246 | 5.896461325 | 3.71E-09       | 2.02E-08    |
| Extl1         | 30.68977728 | 2.49944176  | 0.740892824 | 3.373553741 | 0.000742046    | 0.001917307 |
| Gm17229       | 8.671582308 | 2.495617212 | 0.814726588 | 3.063134613 | 0.002190315    | 0.005140486 |
| Olfr734       | 11.57017055 | 2.495378903 | 0.666060078 | 3.746477209 | 0.000179335    | 0.000518979 |
| Adh1          | 20908.79254 | 2.493462183 | 0.373618289 | 6.673822607 | 2.49E-11       | 1.74E-10    |
| Tppp2         | 0.49859108  | 2.492416059 | 3.564922746 | 0.69915009  | 0.484458238 NA |             |
| Olfr167       | 3.572344895 | 2.489018684 | 1.15569129  | 2.153705497 | 0.031263275    | 0.055861682 |
| 6820408C15Rik | 0.301166705 | 2.488553347 | 3.612176874 | 0.688934522 | 0.490864474 NA |             |
| Actl10        | 0.301166705 | 2.488553347 | 3.612176874 | 0.688934522 | 0.490864474 NA |             |
| Adprhl1       | 0.301166705 | 2.488553347 | 3.612176874 | 0.688934522 | 0.490864474 NA |             |
| Cdh20         | 0.301166705 | 2.488553347 | 3.612176874 | 0.688934522 | 0.490864474 NA |             |
| Gm12226       | 0.301166705 | 2.488553347 | 3.612176874 | 0.688934522 | 0.490864474 NA |             |
| Gm12287       | 0.301166705 | 2.488553347 | 3.612176874 | 0.688934522 | 0.490864474 NA |             |
| Gm12388       | 0.301166705 | 2.488553347 | 3.612176874 | 0.688934522 | 0.490864474 NA |             |
| Gm13232       | 0.301166705 | 2.488553347 | 3.612176874 | 0.688934522 | 0.490864474 NA |             |
| Gm16394       | 0.301166705 | 2.488553347 | 3.612176874 | 0.688934522 | 0.490864474 NA |             |
| Gm16437       | 0.301166705 | 2.488553347 | 3.612176874 | 0.688934522 | 0.490864474 NA |             |
| Gm18722       | 0.301166705 | 2.488553347 | 3.612176874 | 0.688934522 | 0.490864474 NA |             |
| Gm28925       | 0.301166705 | 2.488553347 | 3.612176874 | 0.688934522 | 0.490864474 NA |             |
| Gm3266        | 0.301166705 | 2.488553347 | 3.612176874 | 0.688934522 | 0.490864474 NA |             |
| Gm44976       | 0.301166705 | 2.488553347 | 3.612176874 | 0.688934522 | 0.490864474 NA |             |
| Gm47655       | 0.301166705 | 2.488553347 | 3.612176874 | 0.688934522 | 0.490864474 NA |             |
| Gm5187        | 0.301166705 | 2.488553347 | 3.612176874 | 0.688934522 | 0.490864474 NA |             |
| Gm6058        | 0.301166705 | 2.488553347 | 3.612176874 | 0.688934522 | 0.490864474 NA |             |
| Gm6395        | 0.301166705 | 2.488553347 | 3.612176874 | 0.688934522 | 0.490864474 NA |             |
| Gm7846        | 0.301166705 | 2.488553347 | 3.612176874 | 0.688934522 | 0.490864474 NA |             |
| Klk7          | 0.301166705 | 2.488553347 | 3.612176874 | 0.688934522 | 0.490864474 NA |             |
| Nkx2-3        | 0.301166705 | 2.488553347 | 3.612176874 | 0.688934522 | 0.490864474 NA |             |
| Olfr1014      | 0.301166705 | 2.488553347 | 3.612176874 | 0.688934522 | 0.490864474 NA |             |
| Olfr477       | 0.301166705 | 2.488553347 | 3.612176874 | 0.688934522 | 0.490864474 NA |             |
| Slitrk3       | 0.301166705 | 2.488553347 | 3.612176874 | 0.688934522 | 0.490864474 NA |             |
| Vmn1r15       | 0.301166705 | 2.488553347 | 3.612176874 | 0.688934522 | 0.490864474 NA |             |
| Vmn2r42       | 0.301166705 | 2.488553347 | 3.612176874 | 0.688934522 | 0.490864474 NA |             |
| Them7         | 246.6821738 | 2.488116698 | 0.268006    | 9.283809681 | 1.64E-20       | 2.71E-19    |
| CT009635.2    | 0.300155204 | 2.485275932 | 3.612390613 | 0.687986488 | 0.49146129 NA  |             |
| Pcdh20        | 0.300154446 | 2.485273901 | 3.612390567 | 0.687985935 | 0.491461639 NA |             |
| Fam189a1      | 0.300154404 | 2.485273789 | 3.612390564 | 0.687985904 | 0.491461658 NA |             |
| Gm9246        | 0.300154388 | 2.485273746 | 3.612390563 | 0.687985893 | 0.491461665 NA |             |
| Gm6308        | 0.300154361 | 2.485273674 | 3.612390562 | 0.687985873 | 0.491461678 NA |             |

|             |             |             |             |             |             |             |
|-------------|-------------|-------------|-------------|-------------|-------------|-------------|
| Olf976      | 0.30015436  | 2.485273669 | 3.612390562 | 0.687985872 | 0.491461678 | NA          |
| Olf91357    | 0.300154227 | 2.485273313 | 3.612390554 | 0.687985775 | 0.491461743 | NA          |
| Akap14      | 0.30015422  | 2.485273295 | 3.612390553 | 0.68798577  | 0.491461743 | NA          |
| Pnliprp2    | 0.300154169 | 2.485273159 | 3.61239055  | 0.687985733 | 0.491461766 | NA          |
| Gm3534      | 0.300153933 | 2.485272526 | 3.612390536 | 0.68798556  | 0.491461875 | NA          |
| Gm6283      | 0.300153932 | 2.485272524 | 3.612390536 | 0.68798556  | 0.491461875 | NA          |
| Gm8449      | 0.300153924 | 2.485272502 | 3.612390535 | 0.687985554 | 0.491461879 | NA          |
| Gm14776     | 0.300153847 | 2.485272296 | 3.612390531 | 0.687985497 | 0.491461914 | NA          |
| Gm8367      | 0.300153847 | 2.485272296 | 3.612390531 | 0.687985497 | 0.491461914 | NA          |
| Gm7910      | 0.3001538   | 2.48527217  | 3.612390528 | 0.687985463 | 0.491461936 | NA          |
| Gm7370      | 0.300153728 | 2.485271978 | 3.612390523 | 0.687985411 | 0.491461969 | NA          |
| Rpl10a-ps2  | 0.300153632 | 2.485271719 | 3.612390517 | 0.68798534  | 0.491462013 | NA          |
| Gm15900     | 0.300153593 | 2.485271615 | 3.612390515 | 0.687985312 | 0.491462031 | NA          |
| Hmgb1-rs16  | 0.300153584 | 2.485271592 | 3.612390515 | 0.687985305 | 0.491462035 | NA          |
| Gm5175      | 0.30015345  | 2.485271232 | 3.612390506 | 0.687985207 | 0.491462097 | NA          |
| Gm6520      | 0.300153392 | 2.485271077 | 3.612390503 | 0.687985165 | 0.491462123 | NA          |
| Gm42569     | 0.300153153 | 2.485270438 | 3.612390488 | 0.687984991 | 0.491462233 | NA          |
| Gm4596      | 0.300153132 | 2.48527038  | 3.612390487 | 0.687984975 | 0.491462243 | NA          |
| Rph3a       | 0.497902046 | 2.485043248 | 3.565031454 | 0.69706068  | 0.48576482  | NA          |
| Rhox7-ps1   | 0.519724762 | 2.484445329 | 3.565488706 | 0.69680359  | 0.485925719 | NA          |
| AC154679.1  | 0.299142413 | 2.481988005 | 3.612605169 | 0.687035502 | 0.492060357 | NA          |
| Art2a       | 0.299142413 | 2.481988005 | 3.612605169 | 0.687035502 | 0.492060357 | NA          |
| Atp6v1c2    | 0.299142413 | 2.481988005 | 3.612605169 | 0.687035502 | 0.492060357 | NA          |
| Clps        | 0.299142413 | 2.481988005 | 3.612605169 | 0.687035502 | 0.492060357 | NA          |
| Gm12196     | 0.299142413 | 2.481988005 | 3.612605169 | 0.687035502 | 0.492060357 | NA          |
| Gm12345     | 0.299142413 | 2.481988005 | 3.612605169 | 0.687035502 | 0.492060357 | NA          |
| Gm12593     | 0.299142413 | 2.481988005 | 3.612605169 | 0.687035502 | 0.492060357 | NA          |
| Gm12928     | 0.299142413 | 2.481988005 | 3.612605169 | 0.687035502 | 0.492060357 | NA          |
| Gm13167     | 0.299142413 | 2.481988005 | 3.612605169 | 0.687035502 | 0.492060357 | NA          |
| Gm14099     | 0.299142413 | 2.481988005 | 3.612605169 | 0.687035502 | 0.492060357 | NA          |
| Gm14245     | 0.299142413 | 2.481988005 | 3.612605169 | 0.687035502 | 0.492060357 | NA          |
| Gm15385     | 0.299142413 | 2.481988005 | 3.612605169 | 0.687035502 | 0.492060357 | NA          |
| Gm17258     | 0.299142413 | 2.481988005 | 3.612605169 | 0.687035502 | 0.492060357 | NA          |
| Gm5453      | 0.299142413 | 2.481988005 | 3.612605169 | 0.687035502 | 0.492060357 | NA          |
| Gm6153      | 0.299142413 | 2.481988005 | 3.612605169 | 0.687035502 | 0.492060357 | NA          |
| Gm9583      | 0.299142413 | 2.481988005 | 3.612605169 | 0.687035502 | 0.492060357 | NA          |
| Gphb5       | 0.299142413 | 2.481988005 | 3.612605169 | 0.687035502 | 0.492060357 | NA          |
| Gpr62       | 0.299142413 | 2.481988005 | 3.612605169 | 0.687035502 | 0.492060357 | NA          |
| Grid2       | 0.299142413 | 2.481988005 | 3.612605169 | 0.687035502 | 0.492060357 | NA          |
| Lcn6        | 0.299142413 | 2.481988005 | 3.612605169 | 0.687035502 | 0.492060357 | NA          |
| Olf9548-ps1 | 0.299142413 | 2.481988005 | 3.612605169 | 0.687035502 | 0.492060357 | NA          |
| Pitx3       | 0.299142413 | 2.481988005 | 3.612605169 | 0.687035502 | 0.492060357 | NA          |
| Prg3        | 0.299142413 | 2.481988005 | 3.612605169 | 0.687035502 | 0.492060357 | NA          |
| Rpl23a-ps4  | 0.299142413 | 2.481988005 | 3.612605169 | 0.687035502 | 0.492060357 | NA          |
| Rps15-ps2   | 0.299142413 | 2.481988005 | 3.612605169 | 0.687035502 | 0.492060357 | NA          |
| Sfta2       | 0.299142413 | 2.481988005 | 3.612605169 | 0.687035502 | 0.492060357 | NA          |
| Slc47a2     | 0.299142413 | 2.481988005 | 3.612605169 | 0.687035502 | 0.492060357 | NA          |
| Spdye4b     | 0.299142413 | 2.481988005 | 3.612605169 | 0.687035502 | 0.492060357 | NA          |
| Sst         | 0.299142413 | 2.481988005 | 3.612605169 | 0.687035502 | 0.492060357 | NA          |
| Tpo         | 0.299142413 | 2.481988005 | 3.612605169 | 0.687035502 | 0.492060357 | NA          |
| Vmn1r66     | 0.299142413 | 2.481988005 | 3.612605169 | 0.687035502 | 0.492060357 | NA          |
| Tmem205     | 4641.217854 | 2.481642572 | 0.205432515 | 12.08008661 | 1.35E-33    | 6.20E-32    |
| BC106175    | 0.518547774 | 2.479588434 | 3.565690237 | 0.695402087 | 0.486803353 | NA          |
| H2al1m      | 3.049959464 | 2.47651811  | 1.154408259 | 2.14527061  | 0.031931217 | 0.05694656  |
| Gm2606      | 1.913386264 | 2.47639296  | 2.641041572 | 0.937657698 | 0.34842035  | 0.440839403 |
| Zscan10     | 0.51755451  | 2.475476574 | 3.565861148 | 0.694215639 | 0.487546987 | NA          |
| Oaf         | 2597.108471 | 2.475474861 | 0.273634548 | 9.046645913 | 1.47E-19    | 2.26E-18    |
| Shld2       | 400.0243017 | 2.475276825 | 0.198093037 | 12.49552665 | 7.90E-36    | 4.26E-34    |
| Zfp937      | 148.2816093 | 2.473589093 | 0.273595316 | 9.041050579 | 1.55E-19    | 2.37E-18    |
| Myh7b       | 0.516983198 | 2.473106013 | 3.565959803 | 0.693531658 | 0.487975966 | NA          |
| Eno1b       | 17.7631235  | 2.471853099 | 0.639463771 | 3.865509217 | 0.000110858 | 0.000332612 |
| Gm13366     | 2.273939382 | 2.470764655 | 1.316368886 | 1.876954615 | 0.060524314 | 0.099605996 |
| Popdc3      | 1.130767886 | 2.468431146 | 1.776651038 | 1.389373092 | 0.164719328 | NA          |
| Ankrd2      | 5.282971379 | 2.467422098 | 0.879199381 | 2.806442031 | 0.005009192 | 0.010891049 |
| Zfp354b     | 25.8064635  | 2.465262584 | 0.548698905 | 4.492924194 | 7.03E-06    | 2.54E-05    |
| Lap3        | 3561.763046 | 2.464505516 | 0.185814899 | 13.26322879 | 3.78E-40    | 2.84E-38    |

|             |             |             |             |             |                |             |
|-------------|-------------|-------------|-------------|-------------|----------------|-------------|
| Dnaic1      | 4.742013769 | 2.459932675 | 0.972630321 | 2.529154829 | 0.011433758    | 0.022918601 |
| Mrap2       | 7.340935041 | 2.459702862 | 0.732671971 | 3.357167952 | 0.000787453    | 0.002023589 |
| Gm21750     | 36.02361861 | 2.459170165 | 0.374458159 | 6.56727623  | 5.12E-11       | 3.47E-10    |
| Sord        | 15004.94698 | 2.456510948 | 0.287453063 | 8.545781081 | 1.28E-17       | 1.67E-16    |
| Apol7b      | 11.73017117 | 2.45344894  | 0.609216697 | 4.027218809 | 5.64E-05       | 0.000177233 |
| Pde6g       | 9.032178692 | 2.453402893 | 0.657552754 | 3.731111881 | 0.000190637    | 0.000549725 |
| Pah         | 13075.09092 | 2.452790099 | 0.237744412 | 10.31692009 | 5.91E-25       | 1.39E-23    |
| mt-Co3      | 200593.075  | 2.451876902 | 0.188240051 | 13.02526687 | 8.79E-39       | 5.83E-37    |
| Gm20430     | 0.511316343 | 2.449372521 | 3.566952461 | 0.686684936 | 0.492281292 NA |             |
| Ccdc171     | 122.9873863 | 2.449266631 | 0.310728964 | 7.88232381  | 3.21E-15       | 3.35E-14    |
| Cyp2r1      | 176.1070371 | 2.446199473 | 0.258187103 | 9.474522326 | 2.68E-21       | 4.76E-20    |
| Chpt1       | 2805.812248 | 2.445955789 | 0.287729919 | 8.500874013 | 1.88E-17       | 2.43E-16    |
| Gm14900     | 0.848188465 | 2.445193631 | 3.194662924 | 0.765399571 | 0.444033648 NA |             |
| Tunar       | 5.710319675 | 2.443752428 | 0.879217178 | 2.779463925 | 0.00544487     | 0.011749892 |
| Gm48850     | 25.31730705 | 2.440563438 | 0.618103657 | 3.948469502 | 7.87E-05       | 0.000242077 |
| Hsd11b1     | 6995.162249 | 2.440415768 | 0.229275648 | 10.64402518 | 1.86E-26       | 4.87E-25    |
| Hebp1       | 2963.150064 | 2.438194583 | 0.216122103 | 11.28156053 | 1.62E-29       | 5.49E-28    |
| Grin3b      | 3.884366973 | 2.435474117 | 1.03228192  | 2.359311027 | 0.018308903    | 0.034746764 |
| Olfr324     | 3.823195983 | 2.432966256 | 1.156296778 | 2.104101907 | 0.035369559    | 0.06216932  |
| Slc43a1     | 79.91518393 | 2.430719432 | 0.43125805  | 5.636345641 | 1.74E-08       | 8.74E-08    |
| Rps3a2      | 6.276535141 | 2.427630304 | 1.536776461 | 1.579689932 | 0.114177892    | 0.173053406 |
| Olfr901     | 2.006485797 | 2.42726655  | 1.827268156 | 1.328358151 | 0.184059817    | 0.258749218 |
| Mtnr1a      | 15.49368341 | 2.426521631 | 0.891905968 | 2.720602527 | 0.006516306    | 0.013805143 |
| Orm2        | 397.6782024 | 2.425940136 | 0.936447646 | 2.59057743  | 0.009581506    | 0.019541275 |
| Tepp        | 1.590674874 | 2.425344495 | 1.567973739 | 1.546801732 | 0.121911063 NA |             |
| Lin7a       | 106.5286272 | 2.424391689 | 0.429002121 | 5.651234741 | 1.59E-08       | 8.05E-08    |
| Gm14049     | 0.575704282 | 2.423639825 | 2.784394747 | 0.870436862 | 0.38406171 NA  |             |
| Sned1       | 337.8691953 | 2.421345459 | 0.411504829 | 5.884124045 | 4.00E-09       | 2.17E-08    |
| Chrne       | 2.022784458 | 2.420324987 | 1.579344458 | 1.532487087 | 0.125402282    | 0.187186595 |
| Gm13394     | 14.6601094  | 2.418818253 | 0.778055082 | 3.10880079  | 0.001878483    | 0.004465818 |
| Dbil5       | 4.694540726 | 2.418546926 | 1.009307272 | 2.396244428 | 0.01656404     | 0.031792812 |
| Cela3b      | 0.577700166 | 2.416584859 | 2.783367465 | 0.868223434 | 0.385272028 NA |             |
| Insig2      | 2289.588796 | 2.416309467 | 0.286664156 | 8.429060331 | 3.48E-17       | 4.38E-16    |
| mt-Co2      | 163932.3216 | 2.414825004 | 0.250122208 | 9.654580545 | 4.70E-22       | 8.81E-21    |
| Cat         | 43390.72207 | 2.410540031 | 0.212067286 | 11.36686418 | 6.11E-30       | 2.17E-28    |
| Tmtc2       | 52.26706306 | 2.410076815 | 0.535134438 | 4.503684762 | 6.68E-06       | 2.42E-05    |
| Serpina1d   | 44583.90339 | 2.410061414 | 0.215073522 | 11.20575601 | 3.82E-29       | 1.24E-27    |
| Gm19113     | 0.587367983 | 2.406636573 | 2.776083035 | 0.86691808  | 0.385986897 NA |             |
| Pklr        | 1571.872713 | 2.406578937 | 0.287557809 | 8.36902654  | 5.81E-17       | 7.15E-16    |
| CR954983.1  | 0.787794559 | 2.403993942 | 2.220077381 | 1.08284241  | 0.278878378 NA |             |
| Olfr803     | 0.586404393 | 2.403671232 | 2.777178825 | 0.865508267 | 0.386759881 NA |             |
| Olfr727     | 1.499132793 | 2.40176053  | 1.536410073 | 1.563228835 | 0.11799878 NA  |             |
| Gbp2b       | 13.28911909 | 2.401621879 | 0.962267702 | 2.495793919 | 0.012567559    | 0.02487828  |
| Paox        | 675.2143617 | 2.400602112 | 0.192420947 | 12.47578368 | 1.01E-35       | 5.39E-34    |
| Gm11389     | 0.590559662 | 2.400377164 | 3.401778919 | 0.705624093 | 0.480421937 NA |             |
| Gm37116     | 1.490106823 | 2.399322255 | 1.705792533 | 1.406573486 | 0.1595539 NA   |             |
| Gm18207     | 0.59006242  | 2.397746236 | 3.402681338 | 0.704663763 | 0.481019507 NA |             |
| Smyd1       | 34.91561747 | 2.396475998 | 0.531499617 | 4.508895057 | 6.52E-06       | 2.37E-05    |
| Cyp21a1     | 53.20295217 | 2.396291582 | 0.520120655 | 4.607184039 | 4.08E-06       | 1.52E-05    |
| Dnase2b     | 268.4234671 | 2.394181141 | 0.228714086 | 10.46800913 | 1.21E-25       | 3.00E-24    |
| Vwa8        | 2472.547779 | 2.38978173  | 0.240201334 | 9.94907766  | 2.55E-23       | 5.25E-22    |
| Gm10118     | 0.581271016 | 2.389076765 | 3.415363845 | 0.699508712 | 0.48423417 NA  |             |
| Musk        | 0.581219706 | 2.388808269 | 3.415459105 | 0.69941059  | 0.484295471 NA |             |
| Olfr588-ps1 | 0.58117296  | 2.388563596 | 3.415545902 | 0.699321182 | 0.484351333 NA |             |
| Acss2       | 2293.47821  | 2.388561444 | 0.300215579 | 7.956154225 | 1.77E-15       | 1.91E-14    |
| Cphx3       | 3.847901968 | 2.384803372 | 1.042159867 | 2.288327777 | 0.02211844     | 0.041142953 |
| Lactb2      | 4234.55868  | 2.383302546 | 0.178271532 | 13.36894634 | 9.18E-41       | 7.32E-39    |
| Slc22a30    | 3436.676271 | 2.383249322 | 0.332927619 | 7.158460835 | 8.16E-13       | 6.74E-12    |
| Gm5270      | 0.957660039 | 2.382367521 | 2.067943785 | 1.152046559 | 0.249301942 NA |             |
| Gm7940      | 0.562532027 | 2.382153571 | 3.442672759 | 0.691948883 | 0.488969431 NA |             |
| Cspg5       | 39.09788996 | 2.382107791 | 0.508935593 | 4.680568274 | 2.86E-06       | 1.09E-05    |
| Al182371    | 4385.382222 | 2.381153592 | 0.337918325 | 7.046535855 | 1.83E-12       | 1.46E-11    |
| Gm5934      | 1.210583008 | 2.380665018 | 1.640565133 | 1.451124963 | 0.146745067 NA |             |
| Gm12335     | 0.585989191 | 2.379599037 | 3.439390114 | 0.691866569 | 0.489021127 NA |             |
| Gp1ba       | 0.562004943 | 2.379504898 | 3.443590024 | 0.690995409 | 0.489568426 NA |             |
| Idi1        | 3260.913662 | 2.378861802 | 0.335986581 | 7.08022861  | 1.44E-12       | 1.16E-11    |



|               |             |             |             |             |                |             |
|---------------|-------------|-------------|-------------|-------------|----------------|-------------|
| Wdtd1         | 1246.858227 | 2.377750777 | 0.224351322 | 10.59833637 | 3.03E-26       | 7.81E-25    |
| Fsd1          | 0.595613269 | 2.377749501 | 3.426201475 | 0.693989982 | 0.487688491 NA |             |
| Sucnr1        | 430.1779924 | 2.376100846 | 0.461662178 | 5.146838879 | 2.65E-07       | 1.15E-06    |
| Abcb4         | 2586.513722 | 2.375598319 | 0.304813185 | 7.793620591 | 6.51E-15       | 6.60E-14    |
| Calr3         | 29.68540006 | 2.374481001 | 0.42147416  | 5.633752253 | 1.76E-08       | 8.86E-08    |
| Gm3139        | 0.584860493 | 2.373901239 | 3.441092039 | 0.689868569 | 0.490276843 NA |             |
| Gm3183        | 0.584860493 | 2.373901239 | 3.441092039 | 0.689868569 | 0.490276843 NA |             |
| Macro1        | 441.7100707 | 2.373693867 | 0.194795801 | 12.18554946 | 3.71E-34       | 1.79E-32    |
| Gm11410       | 0.584461669 | 2.372465901 | 3.441826219 | 0.689304384 | 0.49063174 NA  |             |
| Slc17a8       | 72.89901576 | 2.372302673 | 0.385337803 | 6.156423419 | 7.44E-10       | 4.40E-09    |
| Rhag          | 0.584244998 | 2.371450067 | 3.442172475 | 0.688939931 | 0.49086107 NA  |             |
| Vmn1r-ps128   | 4.523311029 | 2.370411366 | 0.965136788 | 2.456036694 | 0.014047881    | 0.027448513 |
| Slc46a3       | 659.203012  | 2.370163797 | 0.255970724 | 9.259511239 | 2.05E-20       | 3.39E-19    |
| Gm37102       | 11.48375295 | 2.368925181 | 0.624265199 | 3.794741696 | 0.000147797    | 0.000434647 |
| Cyp2c39       | 12.64884473 | 2.368638365 | 0.520291969 | 4.552517636 | 5.30E-06       | 1.95E-05    |
| Olfr287       | 1.546285342 | 2.366229786 | 1.968884861 | 1.201812169 | 0.229436309 NA |             |
| Rdh16         | 1044.279252 | 2.364955658 | 0.650539247 | 3.635377371 | 0.000277574    | 0.00077626  |
| 2010109A12Rik | 1.99183041  | 2.363075632 | 1.677487179 | 1.408699667 | 0.158923993    | 0.22848172  |
| Slc25a34      | 98.91593268 | 2.361072158 | 0.406072433 | 5.81441134  | 6.08E-09       | 3.23E-08    |
| Cyp2d10       | 10268.2635  | 2.359830997 | 0.171108465 | 13.79143339 | 2.87E-43       | 2.67E-41    |
| Cfhr1         | 1841.729161 | 2.35783868  | 0.246207646 | 9.576626572 | 1.00E-21       | 1.85E-20    |
| Gm44524       | 4.201944605 | 2.356683864 | 0.941507066 | 2.503097374 | 0.012311167    | 0.024430307 |
| Gm11992       | 10.5938559  | 2.354348887 | 0.621756994 | 3.786606199 | 0.000152719    | 0.000447653 |
| Prlr          | 958.6368464 | 2.351550834 | 0.471110342 | 4.991507561 | 5.99E-07       | 2.49E-06    |
| Slc26a9       | 2.74461473  | 2.351074334 | 1.097009266 | 2.143167252 | 0.032099671    | 0.057212252 |
| Gm17555       | 4.356878612 | 2.350115958 | 1.127501217 | 2.084357801 | 0.037127633    | 0.064964784 |
| Gm18292       | 0.923675115 | 2.348118366 | 1.932160376 | 1.215281296 | 0.224258823 NA |             |
| Gm4468        | 0.631950952 | 2.347523838 | 2.787840291 | 0.842058222 | 0.399755365 NA |             |
| Sfrp2         | 1.193741867 | 2.34670493  | 2.082272092 | 1.126992451 | 0.259745673 NA |             |
| Ttpa          | 3818.285797 | 2.345562314 | 0.274648939 | 8.540219833 | 1.34E-17       | 1.74E-16    |
| Gm5766        | 2.892903661 | 2.345041615 | 1.38325049  | 1.695312334 | 0.090016186    | 0.141294167 |
| 4930529C04Rik | 1.637809393 | 2.343776139 | 1.734510098 | 1.351261167 | 0.176611787    | 0.249927595 |
| Entpd8        | 1433.022429 | 2.343416737 | 0.23020811  | 10.17955769 | 2.45E-24       | 5.47E-23    |
| Gm28437       | 1950.943413 | 2.343150265 | 0.984041862 | 2.381148969 | 0.017258731    | 0.0329629   |
| Spag8         | 9.362880556 | 2.342024767 | 0.644687967 | 3.632803598 | 0.000280358    | 0.000783297 |
| Tfpi2         | 754.6943389 | 2.337921706 | 0.328762798 | 7.111272091 | 1.15E-12       | 9.33E-12    |
| B4galnt3      | 18.81653256 | 2.337649603 | 0.727336252 | 3.213987474 | 0.001309054    | 0.003229288 |
| Echdc1        | 1073.570634 | 2.335979931 | 0.204778621 | 11.4073428  | 3.84E-30       | 1.37E-28    |
| Olfr1434      | 2.612956079 | 2.333984173 | 1.394732866 | 1.673427386 | 0.09424319     | 0.14679828  |
| Ceacam1       | 2558.651009 | 2.330865115 | 0.27716291  | 8.409729543 | 4.11E-17       | 5.14E-16    |
| Gm15824       | 0.806037536 | 2.330346063 | 2.254065175 | 1.033841474 | 0.301210279 NA |             |
| Nrn1          | 2612.439901 | 2.328057045 | 0.156244753 | 14.90006548 | 3.29E-50       | 4.84E-48    |
| Gm19066       | 0.781051349 | 2.327180377 | 2.272735383 | 1.023955712 | 0.305856194 NA |             |
| Clec4g        | 237.183778  | 2.326492637 | 0.579135761 | 4.017180066 | 5.89E-05       | 0.000184476 |
| Cnih3         | 0.791111821 | 2.326116538 | 2.2653636   | 1.026818184 | 0.304506085 NA |             |
| Glo1          | 4946.018727 | 2.324491112 | 0.167632884 | 13.86655803 | 1.01E-43       | 9.67E-42    |
| Spata25       | 0.943815305 | 2.319328487 | 2.164782376 | 1.071391061 | 0.28399363 NA  |             |
| Slc17a2       | 2646.669101 | 2.319279999 | 0.376980804 | 6.152249603 | 7.64E-10       | 4.51E-09    |
| Ecsit         | 581.1330711 | 2.318823896 | 0.216449542 | 10.71299977 | 8.84E-27       | 2.38E-25    |
| Pip5k1b       | 4.340607874 | 2.318494933 | 0.902017668 | 2.570343148 | 0.010159782    | 0.020609706 |
| Dcx           | 11.13062964 | 2.317556196 | 0.751708682 | 3.08305099  | 0.0020489      | 0.004833885 |
| Ttc36         | 6596.710876 | 2.316684733 | 0.152492398 | 15.1921326  | 3.99E-52       | 6.35E-50    |
| Gm5621        | 0.628323542 | 2.31585506  | 2.388363044 | 0.969641138 | 0.3322254 NA   |             |
| Olfr1330      | 3.616496787 | 2.313981121 | 0.94734808  | 2.442588073 | 0.014582371    | 0.028392513 |
| Exd1          | 76.71078851 | 2.313418296 | 0.299542947 | 7.723160631 | 1.13E-14       | 1.12E-13    |
| Vmn1r218      | 84.76776909 | 2.313267357 | 0.280422747 | 8.249214388 | 1.59E-16       | 1.87E-15    |
| Tlcd2         | 1246.872763 | 2.312769089 | 0.221426533 | 10.4448598  | 1.55E-25       | 3.78E-24    |
| Elov15        | 3299.120157 | 2.310475095 | 0.285325751 | 8.097674642 | 5.60E-16       | 6.27E-15    |
| Trim43b       | 0.992443025 | 2.310159328 | 1.870820261 | 1.234837668 | 0.216890925 NA |             |
| Gm6161        | 14.91704683 | 2.309556272 | 0.648789049 | 3.559795399 | 0.000371144    | 0.001015449 |
| Gm47630       | 3.898271745 | 2.308057824 | 1.129777803 | 2.042930759 | 0.041059293    | 0.071034994 |
| Slc6a12       | 1167.81301  | 2.306171789 | 0.298816313 | 7.717690406 | 1.18E-14       | 1.17E-13    |
| Alas1         | 4731.212346 | 2.305068635 | 0.455456209 | 5.061010451 | 4.17E-07       | 1.76E-06    |
| Hsd17b2       | 3084.735858 | 2.304944794 | 0.242436139 | 9.507430724 | 1.95E-21       | 3.50E-20    |
| Olfr355       | 1.422341485 | 2.304525248 | 1.538694539 | 1.497714581 | 0.134207422 NA |             |
| Cyp2j5        | 6687.448541 | 2.303444842 | 0.218258751 | 10.55373421 | 4.88E-26       | 1.24E-24    |

|               |             |             |             |             |                |             |
|---------------|-------------|-------------|-------------|-------------|----------------|-------------|
| Gm17936       | 6.198809552 | 2.301295322 | 0.971757957 | 2.368177492 | 0.017875958    | 0.034023594 |
| G6pc          | 4473.033651 | 2.299297761 | 0.650273419 | 3.535893818 | 0.000406398    | 0.00110358  |
| Tdgf1-ps1     | 0.968573651 | 2.297747055 | 2.606555239 | 0.881526323 | 0.378033013 NA |             |
| Chrb2         | 21.62805052 | 2.294974502 | 0.400888542 | 5.724719624 | 1.04E-08       | 5.37E-08    |
| Eva1a         | 1321.892552 | 2.294099894 | 0.243750738 | 9.411663393 | 4.88E-21       | 8.47E-20    |
| Slc26a4       | 4.773439723 | 2.293153216 | 1.283587238 | 1.786519176 | 0.074015235    | 0.118825853 |
| Arg1          | 19516.92779 | 2.289466702 | 0.416186071 | 5.501065171 | 3.78E-08       | 1.82E-07    |
| Gm10203       | 1.877203168 | 2.289457095 | 1.709936995 | 1.338913131 | 0.180598955    | 0.254618837 |
| Slc25a5-ps    | 1.282630064 | 2.288569793 | 1.984066901 | 1.153474105 | 0.24871584 NA  |             |
| Bbox1         | 1589.868317 | 2.287104286 | 0.288128786 | 7.937784763 | 2.06E-15       | 2.19E-14    |
| Esrrg         | 11.15184796 | 2.286650183 | 0.682690566 | 3.349467967 | 0.000809669    | 0.00207755  |
| Txnip         | 3416.13114  | 2.286260092 | 0.336825566 | 6.787667928 | 1.14E-11       | 8.30E-11    |
| Vmn1r180      | 9.580706007 | 2.285890021 | 0.611850046 | 3.736029825 | 0.000186949    | 0.000540095 |
| 1700128F08Rik | 4.119243432 | 2.285840268 | 0.925574189 | 2.469645648 | 0.013524695    | 0.026523525 |
| Scp2          | 29594.54145 | 2.285328117 | 0.290283796 | 7.872737475 | 3.47E-15       | 3.61E-14    |
| Olfr1487      | 4.362906633 | 2.28509444  | 1.214540968 | 1.881446983 | 0.059911141    | 0.098701694 |
| LT629148.3    | 2.418303632 | 2.284807728 | 1.536732169 | 1.486796316 | 0.137068615    | 0.201652205 |
| Tstd3         | 296.1445761 | 2.284577578 | 0.399181205 | 5.723159182 | 1.05E-08       | 5.41E-08    |
| Glyat         | 3182.778567 | 2.28171857  | 0.361986336 | 6.303327892 | 2.91E-10       | 1.80E-09    |
| Dhdh          | 2066.334013 | 2.278268966 | 0.302644392 | 7.527874394 | 5.16E-14       | 4.81E-13    |
| Magix         | 182.9303255 | 2.277753234 | 0.366355912 | 6.217323532 | 5.06E-10       | 3.04E-09    |
| Slc18a2       | 1.357209965 | 2.277149362 | 1.764240204 | 1.290725241 | 0.196798969 NA |             |
| Psen2         | 2877.88499  | 2.276503013 | 0.437923602 | 5.198402192 | 2.01E-07       | 8.94E-07    |
| Cpeb2         | 876.6418604 | 2.276088847 | 0.254888253 | 8.929751861 | 4.27E-19       | 6.32E-18    |
| Clec2d        | 2245.242276 | 2.275233258 | 0.30025067  | 7.577779118 | 3.52E-14       | 3.33E-13    |
| Dbp           | 789.6820627 | 2.275141801 | 0.457919813 | 4.96842839  | 6.75E-07       | 2.78E-06    |
| Ecm1          | 999.418523  | 2.274771103 | 0.216881172 | 10.4885596  | 9.75E-26       | 2.43E-24    |
| Olfr845       | 2.808152279 | 2.274002806 | 1.144194154 | 1.987427395 | 0.046875054    | 0.079864674 |
| Dppa4         | 0.949821793 | 2.273266228 | 2.614933555 | 0.869339958 | 0.384661213 NA |             |
| Cpt2          | 1728.957446 | 2.273190183 | 0.270872411 | 8.392106728 | 4.78E-17       | 5.92E-16    |
| Shpk          | 540.2897124 | 2.273100722 | 0.29991361  | 7.579184964 | 3.48E-14       | 3.30E-13    |
| Vmn1r77       | 8.612477352 | 2.271860124 | 0.658009734 | 3.452623888 | 0.000555162    | 0.001471686 |
| Mocs1         | 1445.395358 | 2.270407155 | 0.158638648 | 14.31181607 | 1.85E-46       | 2.14E-44    |
| Naa80         | 1042.477648 | 2.270350279 | 0.216139255 | 10.50410893 | 8.27E-26       | 2.07E-24    |
| Hgfac         | 2622.833695 | 2.270050718 | 0.278701571 | 8.145094813 | 3.79E-16       | 4.32E-15    |
| Gm13341       | 27.07127772 | 2.268725491 | 0.433655472 | 5.23163118  | 1.68E-07       | 7.54E-07    |
| Pfkfb1        | 499.1403241 | 2.268614626 | 0.20321524  | 11.16360478 | 6.14E-29       | 1.96E-27    |
| Gls2          | 4113.067323 | 2.267022623 | 0.343561446 | 6.598594368 | 4.15E-11       | 2.83E-10    |
| Gm18635       | 78.28308137 | 2.264657472 | 0.344265101 | 6.57823713  | 4.76E-11       | 3.23E-10    |
| Islr2         | 1.371627481 | 2.26434544  | 1.770120043 | 1.279204452 | 0.200825069 NA |             |
| Mettl26       | 1664.478695 | 2.261189902 | 0.125529903 | 18.01315739 | 1.54E-72       | 8.18E-70    |
| D630039A03Rik | 269.0049184 | 2.260530725 | 0.438870186 | 5.150795835 | 2.59E-07       | 1.13E-06    |
| Pdilt         | 188.0140642 | 2.258086984 | 0.471363053 | 4.790547267 | 1.66E-06       | 6.51E-06    |
| Gm43302       | 57.08614925 | 2.257993201 | 1.72576793  | 1.308399097 | 0.190737979    | 0.266554723 |
| H2bc18        | 7.18510744  | 2.256682833 | 1.198831515 | 1.882401993 | 0.059781455    | 0.098516603 |
| Aldh1l1       | 15070.4858  | 2.25657468  | 0.265382079 | 8.503116279 | 1.85E-17       | 2.39E-16    |
| CR536609.1    | 10.51530397 | 2.256041371 | 0.582644887 | 3.872069283 | 0.000107915    | 0.000324526 |
| Rtp3          | 941.1113237 | 2.255940174 | 0.348584881 | 6.471709759 | 9.69E-11       | 6.34E-10    |
| Mlycd         | 1109.03036  | 2.255736505 | 0.2262898   | 9.968352563 | 2.10E-23       | 4.36E-22    |
| Sardh         | 10827.49912 | 2.25366033  | 0.248992692 | 9.051110335 | 1.42E-19       | 2.17E-18    |
| C1qtnf3       | 3.393764056 | 2.250605304 | 1.119977624 | 2.009509169 | 0.044483163    | 0.076193004 |
| Tbx18         | 5.800592068 | 2.250405712 | 0.864813506 | 2.60218613  | 0.009263156    | 0.018955502 |
| Gabrq         | 2.820308353 | 2.249420533 | 1.637017276 | 1.374097003 | 0.16941157     | 0.241139554 |
| Gm10247       | 1.341643418 | 2.249247665 | 1.678615261 | 1.339942343 | 0.180264091 NA |             |
| Aldh3a2       | 3672.537479 | 2.248883166 | 0.163578008 | 13.74807771 | 5.23E-43       | 4.79E-41    |
| Slc7a2        | 4965.658798 | 2.24825687  | 0.260859082 | 8.618664355 | 6.77E-18       | 9.08E-17    |
| Pctp          | 1114.351556 | 2.247864697 | 0.224784186 | 10.00010158 | 1.52E-23       | 3.21E-22    |
| Ckmt1         | 5.474103728 | 2.247299619 | 0.980494464 | 2.292006433 | 0.021905272    | 0.040768677 |
| Ugt1a1        | 5932.498894 | 2.246981706 | 0.302536942 | 7.427131673 | 1.11E-13       | 9.96E-13    |
| Cnga1         | 0.918187    | 2.245294087 | 1.883109841 | 1.192333043 | 0.233130683 NA |             |
| Hacl1         | 3390.597202 | 2.244406011 | 0.63024488  | 3.561165007 | 0.000369213    | 0.001010815 |
| Prss12        | 2.291794918 | 2.241901943 | 1.413637266 | 1.585910329 | 0.112759652    | 0.171150932 |
| Ehhadh        | 2737.132468 | 2.236121547 | 0.319055508 | 7.008565878 | 2.41E-12       | 1.89E-11    |
| Arhgap26      | 328.4995712 | 2.236093175 | 0.226750243 | 9.861480828 | 6.11E-23       | 1.21E-21    |
| Sult1d1       | 1323.345986 | 2.233530544 | 0.403850372 | 5.530589297 | 3.19E-08       | 1.55E-07    |
| Fasn          | 4409.765886 | 2.232743132 | 0.210264551 | 10.61873303 | 2.44E-26       | 6.32E-25    |

|               |             |             |             |             |                |             |
|---------------|-------------|-------------|-------------|-------------|----------------|-------------|
| Lpin2         | 4266.475167 | 2.231392919 | 0.194279476 | 11.48547942 | 1.56E-30       | 5.75E-29    |
| Gm47842       | 17.5590877  | 2.231070399 | 0.483138456 | 4.617869627 | 3.88E-06       | 1.45E-05    |
| Gm48800       | 14.14068234 | 2.230285247 | 0.756815314 | 2.946934614 | 0.003209411    | 0.007282581 |
| Gm4977        | 4.932852912 | 2.230188315 | 0.966112075 | 2.308415735 | 0.020976025    | 0.039214746 |
| Gm7823        | 1.173669251 | 2.229982822 | 2.421348397 | 0.920967352 | 0.357067473 NA |             |
| Eci1          | 1558.057346 | 2.229037723 | 0.136912492 | 16.28074757 | 1.35E-59       | 3.16E-57    |
| Nxnl1         | 0.553147354 | 2.228516365 | 3.469722717 | 0.642275059 | 0.520694605 NA |             |
| Muc4          | 2.792793606 | 2.227576603 | 1.498027612 | 1.487006371 | 0.137013128    | 0.20158797  |
| Gm45492       | 0.906005167 | 2.226031125 | 1.89194855  | 1.176581216 | 0.239362699 NA |             |
| LO018689.1    | 9.862377233 | 2.223204961 | 1.235053666 | 1.800087739 | 0.071846785    | 0.115736936 |
| Acsf2         | 3122.732254 | 2.223067022 | 0.217599971 | 10.21630202 | 1.68E-24       | 3.78E-23    |
| Gm14445       | 1.525895899 | 2.22234026  | 1.533756672 | 1.448952302 | 0.147350903 NA |             |
| Gm13292       | 1.88318566  | 2.221725006 | 1.877864551 | 1.18311249  | 0.236764568    | 0.319863885 |
| Gm11798       | 3.702333544 | 2.220737708 | 1.467603215 | 1.513173101 | 0.130235695    | 0.19328442  |
| Tmem163       | 3.055943882 | 2.220189743 | 1.146372632 | 1.936708606 | 0.052780973    | 0.088407352 |
| Sigmar1       | 1969.460713 | 2.218913014 | 0.312320788 | 7.104595985 | 1.21E-12       | 9.77E-12    |
| Gm20708       | 114.2792233 | 2.218415602 | 0.543347823 | 4.08286462  | 4.45E-05       | 0.000142122 |
| Sod1          | 12915.15104 | 2.21631674  | 0.179707693 | 12.33289849 | 6.02E-35       | 3.07E-33    |
| Fam90a1b      | 0.43400484  | 2.215961806 | 3.087219436 | 0.717785649 | 0.472889463 NA |             |
| Cadps2        | 117.6317563 | 2.214473073 | 0.278639335 | 7.947453189 | 1.90E-15       | 2.03E-14    |
| Sgcg          | 14.96044539 | 2.214444186 | 0.562673405 | 3.935576422 | 8.30E-05       | 0.000254806 |
| Gm47759       | 6.923208561 | 2.214132138 | 0.754451596 | 2.934757047 | 0.003338089    | 0.007545445 |
| Gm12346       | 2.259592797 | 2.213973966 | 1.814321637 | 1.22027645  | 0.222360094    | 0.303312728 |
| Clip4         | 10.71016607 | 2.212028647 | 0.601836833 | 3.675462393 | 0.000237419    | 0.000673016 |
| Fggy          | 979.0734424 | 2.210447984 | 0.295173734 | 7.488633744 | 6.96E-14       | 6.38E-13    |
| Adhfe1        | 1447.03688  | 2.209341398 | 0.184172599 | 11.99603747 | 3.73E-33       | 1.64E-31    |
| Spata2l       | 321.8299087 | 2.208900554 | 0.364834144 | 6.054533518 | 1.41E-09       | 8.04E-09    |
| Nudt16        | 155.8176826 | 2.208720493 | 0.261211364 | 8.455683    | 2.77E-17       | 3.53E-16    |
| Rsc1a1        | 341.6737346 | 2.208314675 | 0.401716044 | 5.497203077 | 3.86E-08       | 1.86E-07    |
| N4bp211       | 953.601305  | 2.207723242 | 0.35475956  | 6.223292029 | 4.87E-10       | 2.94E-09    |
| Rpl10l        | 0.432827451 | 2.207438685 | 3.089670227 | 0.7144577   | 0.474944203 NA |             |
| Mapt          | 35.77492796 | 2.207161848 | 0.552665438 | 3.993667229 | 6.51E-05       | 0.000202618 |
| Acsf5         | 4479.45731  | 2.206553453 | 0.311144765 | 7.091726116 | 1.32E-12       | 1.07E-11    |
| Rps2-ps5      | 0.432082188 | 2.206344294 | 3.090937181 | 0.713810785 | 0.47534419 NA  |             |
| Utf1          | 0.913213449 | 2.205932635 | 2.585596908 | 0.853161848 | 0.393569558 NA |             |
| Pecr          | 2659.382672 | 2.201003428 | 0.171487545 | 12.83477137 | 1.05E-37       | 6.56E-36    |
| Gm14139       | 0.432368262 | 2.200916735 | 3.090906405 | 0.712061915 | 0.476426437 NA |             |
| Ddt           | 3060.302703 | 2.200393632 | 0.222218483 | 9.901937949 | 4.08E-23       | 8.23E-22    |
| Acad11        | 3202.891077 | 2.199970595 | 0.222370282 | 9.893276098 | 4.45E-23       | 8.92E-22    |
| Gm12247       | 6.314682643 | 2.199323651 | 0.91176306  | 2.412165777 | 0.015858069    | 0.030613562 |
| Kyat1         | 2280.652861 | 2.198908783 | 0.353716366 | 6.216587632 | 5.08E-10       | 3.06E-09    |
| Gm8425        | 0.907760522 | 2.195672686 | 1.888310842 | 1.162770788 | 0.244922512 NA |             |
| Acy3          | 947.5721492 | 2.195224321 | 0.18842827  | 11.65018559 | 2.29E-31       | 8.99E-30    |
| Zpbp2         | 1.344035508 | 2.194012931 | 2.132803113 | 1.028699235 | 0.30362103 NA  |             |
| Gm9212        | 0.915167532 | 2.192572757 | 1.883736473 | 1.163948773 | 0.244444772 NA |             |
| Skint4        | 36.29927417 | 2.18949134  | 0.345365634 | 6.33963292  | 2.30E-10       | 1.45E-09    |
| Gm49320       | 43.03292911 | 2.188845803 | 0.622703308 | 3.515070137 | 0.000439638    | 0.001185909 |
| Papln         | 13.52597802 | 2.186623541 | 0.532204088 | 4.108618459 | 3.98E-05       | 0.000128201 |
| Dmrta1        | 5.695580042 | 2.186323531 | 0.989913976 | 2.208599518 | 0.027202509    | 0.049392733 |
| Ppp1r3b       | 1978.157975 | 2.183505545 | 0.712243255 | 3.065673882 | 0.002171801    | 0.005104764 |
| Nox4          | 600.0691366 | 2.182046299 | 0.14434738  | 15.11663256 | 1.26E-51       | 1.93E-49    |
| Serpina1c     | 122747.8962 | 2.181367298 | 0.217044248 | 10.05033451 | 9.16E-24       | 1.96E-22    |
| Gm12504       | 3.912653986 | 2.181137762 | 1.663658317 | 1.311049114 | 0.189841171    | 0.265562672 |
| Trmt9b        | 63.94311748 | 2.179783839 | 0.533599761 | 4.085053998 | 4.41E-05       | 0.000140894 |
| Rps3a3        | 5.043084998 | 2.178268375 | 1.328949709 | 1.639090147 | 0.101194487    | 0.15592585  |
| 1700001C19Rik | 118.3778413 | 2.175840065 | 0.318112302 | 6.839848854 | 7.93E-12       | 5.88E-11    |
| Gm13722       | 108.0002355 | 2.174513151 | 0.343973835 | 6.321739992 | 2.59E-10       | 1.61E-09    |
| Gm42785       | 63.07236638 | 2.174146739 | 0.277961522 | 7.821754331 | 5.21E-15       | 5.33E-14    |
| Tdh           | 4.601884325 | 2.172368112 | 1.855047389 | 1.171058014 | 0.241575459    | 0.325203602 |
| Vmn2r30       | 1.983033101 | 2.172196125 | 1.50134853  | 1.446830021 | 0.147944536    | 0.215348229 |
| Olfr1467      | 1.370770723 | 2.171780835 | 1.970813817 | 1.10197159  | 0.270474023 NA |             |
| Cyb5a         | 15713.09947 | 2.171751058 | 0.192842279 | 11.26179935 | 2.03E-29       | 6.77E-28    |
| Olfr1261      | 1.930392867 | 2.171513828 | 1.390778618 | 1.561365555 | 0.118437524    | 0.178430798 |
| Adgrf1        | 123.5233844 | 2.170050336 | 0.44005822  | 4.931280081 | 8.17E-07       | 3.34E-06    |
| Olfr1274      | 1.97524551  | 2.16820557  | 1.299619615 | 1.668338601 | 0.095248529    | 0.148167374 |
| Chic1         | 53.6831402  | 2.167189742 | 0.330136487 | 6.564526582 | 5.22E-11       | 3.53E-10    |

|            |             |             |             |             |                |             |
|------------|-------------|-------------|-------------|-------------|----------------|-------------|
| Gm4032     | 25.11543657 | 2.163088533 | 0.604827565 | 3.576372274 | 0.000348395    | 0.000956741 |
| Uncx       | 1.062387166 | 2.161316386 | 1.845719119 | 1.170988784 | 0.241603286 NA |             |
| Nt5e       | 55.61456135 | 2.160121642 | 0.333001349 | 6.486825497 | 8.77E-11       | 5.77E-10    |
| Gm49017    | 1.754401195 | 2.158661419 | 1.896579052 | 1.138186893 | 0.255042451    | 0.339923673 |
| Sp8        | 6.437895822 | 2.158392264 | 0.748147751 | 2.884981291 | 0.003914369    | 0.008708361 |
| AU022252   | 818.4644945 | 2.156355712 | 0.285512516 | 7.552578565 | 4.27E-14       | 4.01E-13    |
| Gm17067    | 3.315430279 | 2.155724005 | 1.205315501 | 1.788514296 | 0.073693071    | 0.118375528 |
| Gm10172    | 3.162323312 | 2.155630703 | 1.215183336 | 1.773913976 | 0.076077381    | 0.121712386 |
| Pdp2       | 478.7662555 | 2.154344904 | 0.245993938 | 8.757715432 | 1.99E-18       | 2.79E-17    |
| Egfm1      | 1.727791633 | 2.154214502 | 1.554913252 | 1.385424235 | 0.165922785    | 0.23692534  |
| Gm14416    | 36.03022275 | 2.15413095  | 0.653676139 | 3.295410098 | 0.000982781    | 0.002482142 |
| Bach2      | 135.9814199 | 2.152239978 | 0.268043085 | 8.029455339 | 9.79E-16       | 1.08E-14    |
| Cpox       | 1262.330093 | 2.151853327 | 0.176176224 | 12.21420959 | 2.61E-34       | 1.28E-32    |
| Gm12407    | 0.873745303 | 2.151644468 | 2.539475717 | 0.847279009 | 0.396839624 NA |             |
| Amdhd1     | 3117.947729 | 2.150892662 | 0.288855324 | 7.446262832 | 9.60E-14       | 8.70E-13    |
| Me3        | 634.9272942 | 2.149565592 | 0.445173638 | 4.828600369 | 1.37E-06       | 5.45E-06    |
| Mobp       | 0.718155352 | 2.148060085 | 2.040167068 | 1.052884403 | 0.292393975 NA |             |
| Zic4       | 0.694709936 | 2.14785366  | 2.05554626  | 1.044906506 | 0.296066183 NA |             |
| Abhd3      | 741.5152438 | 2.147629369 | 0.19694461  | 10.904738   | 1.09E-27       | 3.17E-26    |
| Nit2       | 2172.192943 | 2.144786554 | 0.279214786 | 7.681493465 | 1.57E-14       | 1.53E-13    |
| Gm48366    | 9.051476646 | 2.144706651 | 0.658323441 | 3.257831206 | 0.001122672    | 0.00280425  |
| Gm15878    | 1.256516868 | 2.144554567 | 2.017042346 | 1.063217424 | 0.287683363 NA |             |
| Gpld1      | 2514.789953 | 2.143986311 | 0.273046495 | 7.852092416 | 4.09E-15       | 4.24E-14    |
| Prxl2b     | 131.8182594 | 2.142891379 | 0.238637138 | 8.979706146 | 2.71E-19       | 4.08E-18    |
| Gja10      | 0.846849336 | 2.14235401  | 2.553694841 | 0.838923263 | 0.401512372 NA |             |
| Lsm6       | 542.8592066 | 2.142222294 | 0.198051834 | 10.8164729  | 2.88E-27       | 8.05E-26    |
| Pxmp2      | 1391.947933 | 2.141615679 | 0.255679799 | 8.376163037 | 5.47E-17       | 6.73E-16    |
| Klf1       | 44.88623842 | 2.141367706 | 0.505635567 | 4.235002135 | 2.29E-05       | 7.64E-05    |
| Srrm3      | 12.16570774 | 2.140524736 | 0.686641222 | 3.117384551 | 0.001824634    | 0.004348107 |
| Ndufs5-ps  | 0.56897506  | 2.14021551  | 3.530972348 | 0.606126386 | 0.54443083 NA  |             |
| Hsd17b11   | 1748.316884 | 2.140099959 | 0.210843019 | 10.15020544 | 3.31E-24       | 7.32E-23    |
| H3f4       | 0.511627326 | 2.140008392 | 2.943469116 | 0.727036129 | 0.467203824 NA |             |
| Serpinb1a  | 59.41351639 | 2.139158938 | 0.44066698  | 4.854366307 | 1.21E-06       | 4.82E-06    |
| Rps15a-ps7 | 0.56866187  | 2.13869723  | 3.531515465 | 0.605603246 | 0.544778246 NA |             |
| LT629148.2 | 2.095560115 | 2.137306827 | 1.238804102 | 1.725298473 | 0.084473697    | 0.133533149 |
| Ier2       | 1833.440124 | 2.137119497 | 0.218536575 | 9.779230323 | 1.38E-22       | 2.71E-21    |
| Ppm1k      | 1042.578971 | 2.13611126  | 0.384258102 | 5.559053274 | 2.71E-08       | 1.33E-07    |
| Adh7       | 32.22379165 | 2.136052852 | 0.707385383 | 3.019645164 | 0.00253071     | 0.005857119 |
| Proz       | 5598.404924 | 2.133090133 | 0.242604575 | 8.792456339 | 1.46E-18       | 2.07E-17    |
| Sdhh       | 2777.268061 | 2.132943213 | 0.176231726 | 12.10306036 | 1.02E-33       | 4.75E-32    |
| Gm15937    | 1.220741274 | 2.132882939 | 1.965155878 | 1.085350512 | 0.277766442 NA |             |
| Gm15319    | 2.274464037 | 2.132202144 | 1.663459878 | 1.28178754  | 0.199917186    | 0.27715607  |
| Lclat1     | 399.0976909 | 2.131720546 | 0.375027561 | 5.684170361 | 1.31E-08       | 6.71E-08    |
| Ebpl       | 1088.594172 | 2.131297207 | 0.245197075 | 8.692180376 | 3.56E-18       | 4.86E-17    |
| Icam4      | 4.777962572 | 2.13108214  | 1.098432086 | 1.940112791 | 0.052365984    | 0.087833067 |
| Decr1      | 2095.745065 | 2.126887609 | 0.259928506 | 8.18258699  | 2.78E-16       | 3.21E-15    |
| Mgat4c     | 11.10545925 | 2.126568855 | 0.819973487 | 2.593460508 | 0.009501545    | 0.01939676  |
| Gm11231    | 1.619478997 | 2.124524232 | 1.650224663 | 1.28741515  | 0.197949627 NA |             |
| Amy1       | 2282.063047 | 2.124178664 | 0.167475516 | 12.68351764 | 7.30E-37       | 4.26E-35    |
| Gamt       | 2418.06391  | 2.123164967 | 0.26421873  | 8.035633841 | 9.31E-16       | 1.03E-14    |
| Jsrp1      | 0.54232546  | 2.122808731 | 3.543879352 | 0.599007054 | 0.54916818 NA  |             |
| Zdhhc22    | 1.689638674 | 2.121454465 | 1.414649935 | 1.499632109 | 0.133709725    | 0.19756313  |
| AC117622.1 | 1.670422178 | 2.121378082 | 1.414592603 | 1.499638891 | 0.133707968    | 0.19756313  |
| AC240971.2 | 1.670422178 | 2.121378082 | 1.414592603 | 1.499638891 | 0.133707968    | 0.19756313  |
| AL607107.1 | 1.670422178 | 2.121378082 | 1.414592603 | 1.499638891 | 0.133707968    | 0.19756313  |
| AL646044.1 | 1.670422178 | 2.121378082 | 1.414592603 | 1.499638891 | 0.133707968    | 0.19756313  |
| CR936839.2 | 1.670422178 | 2.121378082 | 1.414592603 | 1.499638891 | 0.133707968    | 0.19756313  |
| CR936842.1 | 1.670422178 | 2.121378082 | 1.414592603 | 1.499638891 | 0.133707968    | 0.19756313  |
| CT009635.1 | 1.670422178 | 2.121378082 | 1.414592603 | 1.499638891 | 0.133707968    | 0.19756313  |
| CU041226.1 | 1.670422178 | 2.121378082 | 1.414592603 | 1.499638891 | 0.133707968    | 0.19756313  |
| FO082328.1 | 1.670422178 | 2.121378082 | 1.414592603 | 1.499638891 | 0.133707968    | 0.19756313  |
| Olfr115    | 0.54250386  | 2.120752724 | 2.889918868 | 0.733845074 | 0.463043166 NA |             |
| Sloc1c1    | 0.542480351 | 2.120518748 | 2.889956152 | 0.733754644 | 0.463098288 NA |             |
| Rapgef4    | 2523.571503 | 2.120389167 | 0.169915788 | 12.47905913 | 9.71E-36       | 5.21E-34    |
| Isoc2b     | 211.7779498 | 2.119885178 | 0.226098884 | 9.375920564 | 6.86E-21       | 1.18E-19    |
| Pex16      | 1040.076058 | 2.11693975  | 0.302290074 | 7.00300781  | 2.51E-12       | 1.96E-11    |

|               |             |             |             |             |                |             |
|---------------|-------------|-------------|-------------|-------------|----------------|-------------|
| Cyp7a1        | 1154.496294 | 2.116555875 | 1.305809861 | 1.620876008 | 0.105044233    | 0.160970255 |
| Calhm4        | 4.91788746  | 2.116232549 | 1.128579664 | 1.875129081 | 0.060774968    | 0.099922041 |
| Gm14659       | 3.444534034 | 2.116057567 | 1.135784689 | 1.863079849 | 0.062451033    | 0.102302797 |
| AC110514.1    | 0.522214411 | 2.115601362 | 2.933635805 | 0.721153375 | 0.470815155 NA |             |
| Rbpms2        | 609.0466429 | 2.115550075 | 0.188041306 | 11.25045406 | 2.30E-29       | 7.64E-28    |
| Ccdc107       | 831.9289904 | 2.115110024 | 0.130834944 | 16.16624708 | 8.73E-59       | 1.91E-56    |
| Angptl8       | 978.6474863 | 2.113232379 | 0.250916786 | 8.422044679 | 3.70E-17       | 4.63E-16    |
| Ndnf          | 9.709266139 | 2.112486422 | 0.952505196 | 2.217821416 | 0.026567011    | 0.04833665  |
| Mmaa          | 323.8614022 | 2.111713404 | 0.172916052 | 0.172916052 | 2.67E-34       | 1.30E-32    |
| Jph1          | 16.18132401 | 2.109602898 | 0.780807072 | 2.701823505 | 0.006896036    | 0.014530172 |
| Gm15982       | 0.514731716 | 2.109566787 | 2.942410105 | 0.716951992 | 0.473403719 NA |             |
| Gm14554       | 0.521909854 | 2.109373615 | 2.93443031  | 0.718835819 | 0.472242085 NA |             |
| Gm11338       | 0.522775512 | 2.109173485 | 2.933500475 | 0.718995447 | 0.472143725 NA |             |
| Olfr979       | 0.509383404 | 2.109125186 | 2.948461165 | 0.715330834 | 0.47440464 NA  |             |
| Akt2-ps       | 0.51550686  | 2.108094364 | 2.941662728 | 0.716633604 | 0.473600204 NA |             |
| Gm48260       | 8.929666026 | 2.107961893 | 0.651810929 | 3.234008208 | 0.001220659    | 0.003027761 |
| Gm11453       | 0.499332523 | 2.107852046 | 2.960756874 | 0.711930137 | 0.476508039 NA |             |
| Serpine3      | 0.499283938 | 2.107373409 | 2.960822686 | 0.711752655 | 0.476617955 NA |             |
| Olfr713       | 18.83505962 | 2.106979924 | 0.576731075 | 3.653314366 | 0.000258877    | 0.000728754 |
| Aqp4          | 75.48593538 | 2.10693876  | 0.660636225 | 3.189257085 | 0.00142639     | 0.003488322 |
| Vmn1r70       | 0.49920735  | 2.106613981 | 2.960926479 | 0.711471222 | 0.476792278 NA |             |
| Gm12217       | 4.427942106 | 2.106580281 | 0.915470547 | 2.301090174 | 0.021386535    | 0.039894698 |
| Vmn1r215      | 0.50840952  | 2.106500253 | 2.949772328 | 0.714122996 | 0.475151127 NA |             |
| Gm13339       | 1.721649055 | 2.105517635 | 1.417746089 | 1.485116166 | 0.137513054    | 0.20218392  |
| Camk1d        | 761.9729299 | 2.105312546 | 0.283508123 | 7.425933774 | 1.12E-13       | 1.00E-12    |
| Aadac         | 5907.879655 | 2.104577842 | 0.335406088 | 6.274715686 | 3.50E-10       | 2.14E-09    |
| 9330182O14Rik | 1.218055982 | 2.101398906 | 1.760602392 | 1.19356813  | 0.232646947 NA |             |
| Fmo5          | 7405.78237  | 2.100506491 | 0.312306649 | 6.725782164 | 1.75E-11       | 1.24E-10    |
| Alad          | 1777.765452 | 2.099753047 | 0.145177083 | 14.4633919  | 2.06E-47       | 2.57E-45    |
| Awat2         | 16.99799314 | 2.099111639 | 0.532551173 | 3.941614905 | 8.09E-05       | 0.000248698 |
| Aatk          | 95.86250208 | 2.099011042 | 0.479992567 | 4.373007393 | 1.23E-05       | 4.26E-05    |
| Aass          | 3364.637197 | 2.098871423 | 0.269991424 | 7.77384477  | 7.61E-15       | 7.67E-14    |
| Olfr523       | 124.7153797 | 2.097946451 | 0.377686156 | 5.55473485  | 2.78E-08       | 1.36E-07    |
| Gcgr          | 3855.281093 | 2.097548223 | 0.192557228 | 10.89311602 | 1.24E-27       | 3.57E-26    |
| Vmn1r28       | 1.053251357 | 2.097378537 | 1.730505336 | 1.212003507 | 0.225511038 NA |             |
| Pax5          | 12.19471922 | 2.096750866 | 0.869793492 | 2.410630668 | 0.015924966    | 0.03072183  |
| Ropn1l        | 156.7873828 | 2.095825628 | 0.309663458 | 6.768075391 | 1.31E-11       | 9.44E-11    |
| Amacr         | 1826.82319  | 2.095379674 | 0.261880003 | 8.001296978 | 1.23E-15       | 1.35E-14    |
| Gm12993       | 2.026211525 | 2.095168422 | 1.360046506 | 1.540512338 | 0.123435518    | 0.184736082 |
| Ankub1        | 9.120893797 | 2.09400126  | 0.69341496  | 3.019838597 | 0.002529094    | 0.005854175 |
| Adh5          | 5181.431595 | 2.0931637   | 0.250832723 | 8.344858966 | 7.13E-17       | 8.68E-16    |
| Reg2          | 21.56151972 | 2.092537064 | 0.524208271 | 3.991804746 | 6.56E-05       | 0.000204141 |
| Lactb         | 603.6675263 | 2.092190289 | 0.166285752 | 12.58189754 | 2.66E-36       | 1.50E-34    |
| Cib3          | 152.9945868 | 2.090966358 | 0.364095363 | 5.742908509 | 9.31E-09       | 4.85E-08    |
| Gm28819       | 32.37580869 | 2.090654893 | 0.523673161 | 3.992289559 | 6.54E-05       | 0.000203761 |
| Smad9         | 188.0694706 | 2.089303769 | 0.360629638 | 5.793488798 | 6.89E-09       | 3.64E-08    |
| Chac1         | 84.0573981  | 2.088810268 | 0.659859311 | 3.165538823 | 0.00154796     | 0.003750124 |
| Nxf2          | 0.411111976 | 2.084794204 | 3.132985168 | 0.665433793 | 0.505773077 NA |             |
| Bhmt-ps1      | 1.915937325 | 2.084769776 | 1.900561632 | 1.096923005 | 0.272675051    | 0.359404347 |
| Gm20547       | 50.33678952 | 2.084515509 | 1.500704196 | 1.389024908 | 0.164825176    | 0.235506252 |
| 1110032A03Rik | 515.5912165 | 2.083336058 | 0.191384794 | 10.88558819 | 1.35E-27       | 3.86E-26    |
| Sp9           | 1.036906612 | 2.077603814 | 2.084666226 | 0.99661221  | 0.318952777 NA |             |
| C2cd2         | 1509.975942 | 2.07594937  | 0.235605605 | 8.811120457 | 1.24E-18       | 1.77E-17    |
| Gm10644       | 62.47623335 | 2.075832051 | 0.390112856 | 5.3211065   | 1.03E-07       | 4.73E-07    |
| Lrp2bp        | 12.77297489 | 2.075071175 | 0.652699266 | 3.179214812 | 0.001476746    | 0.003594969 |
| Slc46a1       | 493.6836033 | 2.074230741 | 0.175938046 | 11.78955201 | 4.42E-32       | 1.82E-30    |
| Cyp46a1       | 28.79811942 | 2.073440063 | 0.585539765 | 3.541074726 | 0.000398501    | 0.001083688 |
| Ptgds         | 61.91310279 | 2.072258621 | 0.472092872 | 4.389514745 | 1.14E-05       | 3.97E-05    |
| Cyp51         | 2581.307534 | 2.070966548 | 0.343971677 | 6.02074731  | 1.74E-09       | 9.81E-09    |
| Gm12366       | 2.726484778 | 2.070863544 | 1.245301328 | 1.66294173  | 0.0963241      | 0.149543143 |
| Urah          | 2425.962795 | 2.069995773 | 0.21642194  | 9.564629987 | 1.13E-21       | 2.06E-20    |
| Gm9353        | 2.634768115 | 2.069487201 | 1.140364847 | 1.814758853 | 0.069560976    | 0.112533263 |
| Gm5380        | 5.425083058 | 2.068184238 | 1.025592264 | 2.016575505 | 0.043739831    | 0.075100881 |
| Pde9a         | 283.2546357 | 2.0660547   | 0.397041438 | 5.203624868 | 1.95E-07       | 8.71E-07    |
| Rxfp1         | 12.96839967 | 2.06500166  | 0.898881481 | 2.297301372 | 0.021601584    | 0.040243011 |
| Eli2          | 932.3795147 | 2.064449834 | 0.193886372 | 10.6477305  | 1.79E-26       | 4.69E-25    |



|               |             |             |             |             |                |             |
|---------------|-------------|-------------|-------------|-------------|----------------|-------------|
| Ech1          | 4080.543454 | 2.063908339 | 0.139876532 | 14.7552153  | 2.85E-49       | 3.95E-47    |
| Gm9372        | 1.15785938  | 2.061843669 | 1.743106995 | 1.182855485 | 0.236866426 NA |             |
| Pou3f4        | 0.803590541 | 2.061005525 | 2.624323449 | 0.785347373 | 0.432249928 NA |             |
| 1190005I06Rik | 93.13979749 | 2.060360636 | 0.318806263 | 6.462735762 | 1.03E-10       | 6.71E-10    |
| Olfr591       | 0.804133634 | 2.059496588 | 2.2104487   | 0.931709742 | 0.35148655 NA  |             |
| BC049762      | 4.673208247 | 2.059184319 | 0.90501565  | 2.275302442 | 0.022887793    | 0.042416686 |
| Imm2l         | 287.0978814 | 2.058620505 | 0.180289377 | 11.41842375 | 3.38E-30       | 1.21E-28    |
| Gm14293       | 1.420678122 | 2.058317288 | 1.557135274 | 1.321861576 | 0.186214249 NA |             |
| Klhl14        | 0.7858534   | 2.052492828 | 2.0466128   | 1.002873053 | 0.315922116 NA |             |
| Uqcrb         | 2306.221346 | 2.052314755 | 0.217550749 | 9.433728747 | 3.96E-21       | 6.93E-20    |
| 5730522E02Rik | 2.6152146   | 2.051823902 | 1.531750623 | 1.339528688 | 0.180398622    | 0.254420558 |
| S100a1        | 1333.287001 | 2.051654106 | 0.186548623 | 10.99795902 | 3.91E-28       | 1.18E-26    |
| Rpl7a-ps3     | 0.938480603 | 2.051241184 | 3.112498065 | 0.659033722 | 0.509874114 NA |             |
| Gm49001       | 0.674130797 | 2.050312473 | 2.788735491 | 0.735212242 | 0.462210244 NA |             |
| Pygl          | 4644.345566 | 2.048571821 | 0.273616676 | 7.487013767 | 7.05E-14       | 6.45E-13    |
| Zfp454        | 8.913062371 | 2.047902611 | 0.734429701 | 2.788425642 | 0.00529649     | 0.011457248 |
| Etfb          | 4090.201464 | 2.047147879 | 0.161061847 | 12.71032167 | 5.18E-37       | 3.07E-35    |
| Asgr2         | 2357.618973 | 2.046431668 | 0.182430251 | 11.21761141 | 3.34E-29       | 1.09E-27    |
| Tmem132d      | 0.783701154 | 2.04484525  | 2.739251435 | 0.746497829 | 0.455366742 NA |             |
| Pou6f2        | 0.67188796  | 2.043162567 | 2.790744312 | 0.732121018 | 0.464094706 NA |             |
| Aox1          | 1875.662192 | 2.041780611 | 0.330033653 | 6.18658307  | 6.15E-10       | 3.66E-09    |
| Egfr          | 9102.95301  | 2.041732159 | 0.303818583 | 6.720234613 | 1.81E-11       | 1.29E-10    |
| Arhgef26      | 686.9275145 | 2.040574903 | 0.324070826 | 6.296694232 | 3.04E-10       | 1.88E-09    |
| IOC0044D17Rik | 1.980212342 | 2.040373788 | 1.700173665 | 1.200097278 | 0.230101562    | 0.312397184 |
| Klhl7         | 136.5019999 | 2.040197537 | 0.25975321  | 7.854368917 | 4.02E-15       | 4.17E-14    |
| 9330182L06Rik | 4.874701408 | 2.037086754 | 0.980450601 | 2.07770463  | 0.037736572    | 0.065922029 |
| CR936839.3    | 29.81324392 | 2.036572504 | 0.442072199 | 4.60687758  | 4.09E-06       | 1.52E-05    |
| Ethe1         | 1149.768024 | 2.036060875 | 0.284920059 | 7.146077687 | 8.93E-13       | 7.34E-12    |
| Olfr709-ps1   | 13.08178457 | 2.035974994 | 0.550626867 | 3.697558391 | 0.000217683    | 0.000621619 |
| Uqcr11        | 2589.852203 | 2.035683725 | 0.129702591 | 15.69501203 | 1.64E-55       | 3.07E-53    |
| Otoa          | 14.78571564 | 2.03533027  | 0.680912522 | 2.989121516 | 0.002797808    | 0.006420385 |
| Gm4735        | 1.330777645 | 2.03456669  | 2.934229821 | 0.693390366 | 0.488064606 NA |             |
| Ccs           | 2503.249883 | 2.034075459 | 0.176357983 | 11.53378729 | 8.91E-31       | 3.33E-29    |
| Gm13340       | 47.89465675 | 2.033628836 | 0.326444998 | 6.229621684 | 4.68E-10       | 2.82E-09    |
| Olfr31        | 20.96820079 | 2.033549442 | 0.429359087 | 4.736244095 | 2.18E-06       | 8.37E-06    |
| H2ac19        | 591.8165114 | 2.033331321 | 0.243062841 | 8.365455256 | 5.99E-17       | 7.35E-16    |
| Gm48541       | 53.50507118 | 2.028492056 | 0.38454305  | 5.275071433 | 1.33E-07       | 6.00E-07    |
| Mfsd4b3-ps    | 109.2486727 | 2.028435701 | 0.347252204 | 5.841390432 | 5.18E-09       | 2.76E-08    |
| Aadat         | 1927.279625 | 2.028332903 | 0.283528716 | 7.153888796 | 8.44E-13       | 6.96E-12    |
| Shmt2         | 3101.058368 | 2.028192279 | 0.309597375 | 6.551064204 | 5.71E-11       | 3.85E-10    |
| Igfals        | 1431.60998  | 2.027683525 | 0.282664884 | 7.173453937 | 7.31E-13       | 6.08E-12    |
| Fah           | 9255.108429 | 2.026908228 | 0.220634836 | 9.186709868 | 4.05E-20       | 6.53E-19    |
| Dhcr7         | 1416.518383 | 2.026660387 | 0.280509959 | 7.224914214 | 5.01E-13       | 4.23E-12    |
| Urod          | 960.1240655 | 2.023692838 | 0.200648712 | 10.08575043 | 6.39E-24       | 1.38E-22    |
| Asl           | 5649.342752 | 2.022900863 | 0.385151651 | 5.252219119 | 1.50E-07       | 6.76E-07    |
| Gm12080       | 1.390894962 | 2.021345962 | 1.942436084 | 1.040624182 | 0.298050003 NA |             |
| Spink5        | 4.771504502 | 2.019869345 | 1.235539818 | 1.634807164 | 0.102089478    | 0.157106105 |
| Bcl2l15       | 2.414201989 | 2.015076249 | 1.24498468  | 1.618555057 | 0.105543032    | 0.161531341 |
| Cyb5b         | 4988.062377 | 2.014200032 | 0.254161693 | 7.924876513 | 2.28E-15       | 2.42E-14    |
| Col24a1       | 3.976221027 | 2.013038244 | 1.064398852 | 1.891244283 | 0.058591742    | 0.096790506 |
| Prr18         | 4.976565059 | 2.010932384 | 0.95445932  | 2.106881187 | 0.03512788     | 0.061836908 |
| Coq3          | 299.5724138 | 2.009436833 | 0.358446546 | 5.605959535 | 2.07E-08       | 1.04E-07    |
| Nmnat1        | 235.4010944 | 2.007352464 | 0.227712991 | 8.815274238 | 1.19E-18       | 1.71E-17    |
| Rbbp8nl       | 0.837162669 | 2.007211104 | 2.232214294 | 0.899201797 | 0.368545183 NA |             |
| H4c1          | 5.419507903 | 2.006889115 | 1.161027445 | 1.728545801 | 0.083890417    | 0.132729822 |
| Elane         | 1.880606225 | 2.005426834 | 1.476698454 | 1.358047628 | 0.174448572    | 0.24729746  |
| Zfp780b       | 198.2965805 | 2.005112086 | 0.229447018 | 8.738889267 | 2.35E-18       | 3.27E-17    |
| Hyl           | 824.3648412 | 2.004324017 | 0.210028817 | 9.543090549 | 1.39E-21       | 2.52E-20    |
| Phlda1        | 1163.62149  | 2.004262749 | 0.678790225 | 2.952698307 | 0.003150097    | 0.007158471 |
| Chst10        | 18.39286072 | 2.003563131 | 0.540414589 | 3.707455664 | 0.000209352    | 0.000599334 |
| Pnpo          | 2286.634552 | 2.003199801 | 0.268089716 | 7.472124742 | 7.89E-14       | 7.19E-13    |
| Tspan12       | 1736.139571 | 2.002883703 | 0.213312972 | 9.389413537 | 6.03E-21       | 1.04E-19    |
| Tedd2         | 14.96860046 | 2.002373014 | 0.589150898 | 3.398743885 | 0.000676961    | 0.001761705 |
| Hba-a2        | 996.1965529 | 2.001724219 | 0.401125481 | 4.990269409 | 6.03E-07       | 2.50E-06    |
| Baat          | 3692.77269  | 2.001087317 | 0.326706859 | 6.125023891 | 9.07E-10       | 5.31E-09    |
| Gm49028       | 1.759679564 | 2.000546296 | 1.382301016 | 1.447258067 | 0.147824659    | 0.215210485 |

|             |             |             |             |             |                |             |
|-------------|-------------|-------------|-------------|-------------|----------------|-------------|
| Gm14735     | 25.59620218 | 1.999410811 | 0.415701427 | 4.809728044 | 1.51E-06       | 5.94E-06    |
| Gm12338     | 580.8105757 | 1.998176466 | 0.191297576 | 10.4453831  | 1.54E-25       | 3.77E-24    |
| Gm49356     | 1.747938997 | 1.997639834 | 2.272766983 | 0.878946169 | 0.379430464    | 0.471382065 |
| Tsga13      | 0.984416016 | 1.997190745 | 1.738225456 | 1.148982566 | 0.25056317 NA  |             |
| Vmn1r211    | 1.131864373 | 1.995415774 | 1.771070805 | 1.126671937 | 0.259881212 NA |             |
| Olfr118     | 4.030409737 | 1.994954317 | 0.963079801 | 2.071431999 | 0.038318443    | 0.06683131  |
| St3gal3     | 824.7859551 | 1.993685046 | 0.209380872 | 9.521810781 | 1.70E-21       | 3.06E-20    |
| Cyp2d26     | 10241.97447 | 1.993299154 | 0.191386525 | 10.41504442 | 2.12E-25       | 5.13E-24    |
| Aldh9a1     | 3113.982144 | 1.992108688 | 0.250401153 | 7.955669    | 1.78E-15       | 1.91E-14    |
| Pcsk2       | 4.496064818 | 1.99044983  | 0.819854933 | 2.427807346 | 0.01519041     | 0.029434657 |
| Gm2961      | 0.97047409  | 1.990363219 | 1.941010895 | 1.025426093 | 0.305162181 NA |             |
| Gm47476     | 18.61386179 | 1.988042222 | 0.571548932 | 3.47834124  | 0.000504527    | 0.001347303 |
| Atp5k       | 1272.119093 | 1.988032301 | 0.165560489 | 12.00789098 | 3.23E-33       | 1.44E-31    |
| Aldob       | 45891.21022 | 1.987579654 | 0.262574799 | 7.569575075 | 3.74E-14       | 3.53E-13    |
| Ndufa1      | 966.7129253 | 1.987432327 | 0.218855404 | 9.081029246 | 1.08E-19       | 1.67E-18    |
| Muc3a       | 1.862504579 | 1.986916165 | 1.736721946 | 1.144061183 | 0.252598264    | 0.337378189 |
| Amhr2       | 3.64802535  | 1.985995117 | 1.141869577 | 1.739248647 | 0.081991036    | 0.130026342 |
| Ak2         | 3218.004123 | 1.983892141 | 0.17168149  | 11.55565543 | 6.91E-31       | 2.61E-29    |
| Adgrg7      | 1.720341337 | 1.98326304  | 2.030618018 | 0.976679525 | 0.328727835    | 0.420605834 |
| Gm2253      | 1.20452988  | 1.983249508 | 1.741274437 | 1.13896435  | 0.254718024 NA |             |
| Olfr846     | 9.328442043 | 1.982644856 | 0.686264167 | 2.889040332 | 0.003864195    | 0.008610221 |
| Slc25a45    | 460.9953915 | 1.982554637 | 0.244868418 | 8.096408072 | 5.66E-16       | 6.33E-15    |
| Nol4        | 2.723940664 | 1.982072561 | 1.308145159 | 1.515177843 | 0.129727373    | 0.192647408 |
| Gphn        | 949.9253625 | 1.981278838 | 0.31653346  | 6.259303005 | 3.87E-10       | 2.36E-09    |
| Fam135b     | 16.60448484 | 1.980494515 | 0.470507186 | 4.209275808 | 2.56E-05       | 8.50E-05    |
| Ugt1a2      | 3.799400276 | 1.980266123 | 1.652833795 | 1.198103602 | 0.230876687    | 0.313257234 |
| Plk3        | 869.5883811 | 1.980252543 | 0.325530672 | 6.083151956 | 1.18E-09       | 6.81E-09    |
| H60b        | 0.626939089 | 1.979081977 | 2.358013992 | 0.839300353 | 0.401300785 NA |             |
| Pgrmc1      | 15879.44141 | 1.978572442 | 0.192854807 | 10.25938877 | 1.07E-24       | 2.48E-23    |
| Slc39a2     | 39.69513875 | 1.977490151 | 0.465323251 | 4.249712744 | 2.14E-05       | 7.18E-05    |
| Nr4a1       | 244.7574951 | 1.977424151 | 0.384107061 | 5.148106748 | 2.63E-07       | 1.15E-06    |
| Cacna1i     | 3.193541264 | 1.976195333 | 1.271834654 | 1.553814662 | 0.120228632    | 0.180698027 |
| Ftl1-ps1    | 208.8145552 | 1.97571347  | 0.341435632 | 5.786488826 | 7.19E-09       | 3.78E-08    |
| Coq10a      | 340.4656061 | 1.975148869 | 0.199544389 | 9.898293192 | 4.23E-23       | 8.52E-22    |
| Cc2d2b      | 0.598546263 | 1.974900553 | 3.476644694 | 0.568047853 | 0.570002475 NA |             |
| Ccl21c      | 0.805782395 | 1.974754841 | 2.046945291 | 0.964732594 | 0.334678765 NA |             |
| Gm10591     | 0.805782395 | 1.974754841 | 2.046945291 | 0.964732594 | 0.334678765 NA |             |
| Olfr652     | 4.40199643  | 1.974590129 | 1.04936806  | 1.881694521 | 0.059877504    | 0.098658089 |
| Ndufs5      | 817.17664   | 1.974556967 | 0.202100617 | 9.77016792  | 1.51E-22       | 2.94E-21    |
| Gm15732     | 1.727784723 | 1.974405045 | 1.383953157 | 1.426641527 | 0.153683248    | 0.222391309 |
| Slc29a1     | 2443.60556  | 1.973261262 | 0.283924604 | 6.949948095 | 3.65E-12       | 2.81E-11    |
| Lrrc19      | 0.632415377 | 1.972293838 | 2.352391835 | 0.838420627 | 0.401794509 NA |             |
| Slc6a7      | 5.642761438 | 1.972093093 | 1.023610706 | 1.926604597 | 0.054028925    | 0.090205183 |
| Gm8439      | 0.350741331 | 1.970694113 | 3.607786286 | 0.546233606 | 0.584905368 NA |             |
| Zfp663      | 0.608941391 | 1.970676462 | 2.376509466 | 0.82923148  | 0.406973435 NA |             |
| Ndufb3      | 873.5490125 | 1.96921144  | 0.164041057 | 12.00438157 | 3.37E-33       | 1.49E-31    |
| Apoa4       | 1009.440422 | 1.96900585  | 0.66792832  | 2.947929878 | 0.003199096    | 0.007263043 |
| Gm20438     | 0.349421797 | 1.968192895 | 3.608115256 | 0.545490583 | 0.585416155 NA |             |
| Gm49243     | 0.349411676 | 1.968136906 | 3.608116571 | 0.545474867 | 0.585426962 NA |             |
| Gm13436     | 0.347423781 | 1.962374965 | 3.277243574 | 0.598788256 | 0.549314095 NA |             |
| Mlxipl      | 7631.072836 | 1.962174409 | 0.273422956 | 7.176333823 | 7.16E-13       | 5.96E-12    |
| Gm6198      | 1.707491847 | 1.962172701 | 1.68077418  | 1.167421968 | 0.243040004    | 0.32668501  |
| Igsf21      | 0.619061969 | 1.960743079 | 2.806364731 | 0.69867721  | 0.48475378 NA  |             |
| Gm15515     | 2.863376566 | 1.960439169 | 1.173273154 | 1.670914537 | 0.09473856     | 0.147471053 |
| Nars2       | 285.1401373 | 1.959098845 | 0.33296839  | 5.883738232 | 4.01E-09       | 2.18E-08    |
| Gm13517     | 0.60886123  | 1.958530412 | 2.820368092 | 0.694423688 | 0.487416543 NA |             |
| Inhbc       | 733.1415775 | 1.957596783 | 0.330224431 | 5.928079808 | 3.06E-09       | 1.69E-08    |
| Vit         | 2.054614743 | 1.957412391 | 1.235406887 | 1.584427293 | 0.113096515    | 0.171612763 |
| Gm13230     | 0.785409337 | 1.956414904 | 2.052249413 | 0.953302699 | 0.340436724 NA |             |
| Gm15666     | 0.857251436 | 1.956377418 | 2.323114547 | 0.842135581 | 0.399712067 NA |             |
| Ugt1a6b     | 1653.745872 | 1.956058772 | 0.36238445  | 5.397744782 | 6.75E-08       | 3.16E-07    |
| Gm47632     | 5.390645532 | 1.955732131 | 1.218195317 | 1.60543396  | 0.108398336    | 0.165366875 |
| Col17a1     | 0.624091618 | 1.955409491 | 2.79917283  | 0.698566902 | 0.484822734 NA |             |
| Gm8824      | 0.346632565 | 1.955260981 | 3.27956116  | 0.596195919 | 0.551044351 NA |             |
| Agxt2       | 2268.941886 | 1.954097855 | 0.299859114 | 6.516719895 | 7.19E-11       | 4.79E-10    |
| Olfr465-ps1 | 0.347404688 | 1.952132035 | 3.608221009 | 0.54102341  | 0.588491447 NA |             |

|               |             |             |             |             |             |    |             |
|---------------|-------------|-------------|-------------|-------------|-------------|----|-------------|
| Tmem217       | 0.346513257 | 1.95197537  | 3.608497449 | 0.540938548 | 0.58854994  | NA |             |
| Olfr782       | 0.346221396 | 1.95153623  | 3.280768761 | 0.59484114  | 0.551949665 | NA |             |
| Olfr1100      | 0.347270982 | 1.951381182 | 3.608238664 | 0.540812669 | 0.58863671  | NA |             |
| Muc15         | 0.347249754 | 1.951261919 | 3.608241469 | 0.540779196 | 0.588659784 | NA |             |
| Vmn1r72       | 24.09528072 | 1.951215304 | 0.445266558 | 4.382128566 | 1.18E-05    |    | 4.10E-05    |
| Qrich2        | 0.34618367  | 1.951193543 | 3.280879669 | 0.594716582 | 0.552032936 | NA |             |
| Slc16a7       | 616.3541974 | 1.951095445 | 0.294953275 | 6.614930613 | 3.72E-11    |    | 2.55E-10    |
| Gm13349       | 0.802541278 | 1.95088754  | 2.300072558 | 0.848185216 | 0.396334829 | NA |             |
| Rbm8a2        | 1.459973691 | 1.949921394 | 1.6898307   | 1.153915238 | 0.248534921 | NA |             |
| Gpr152        | 0.346033743 | 1.949829963 | 3.281320625 | 0.594221104 | 0.55236424  | NA |             |
| Hjv           | 1281.667718 | 1.948469199 | 0.435911241 | 4.469876008 | 7.83E-06    |    | 2.80E-05    |
| Olfr63        | 100.3826379 | 1.94820198  | 0.380124102 | 5.125173522 | 2.97E-07    |    | 1.29E-06    |
| Wbp2nl        | 0.34583715  | 1.948168526 | 3.608587531 | 0.539870104 | 0.589286617 | NA |             |
| Cpvl          | 0.345781415 | 1.947854076 | 3.608594978 | 0.539781851 | 0.589347485 | NA |             |
| Tmem220       | 186.5330442 | 1.947463182 | 0.234665164 | 8.29890194  | 1.05E-16    |    | 1.26E-15    |
| Gck           | 2029.43376  | 1.94694502  | 0.830144636 | 2.345308197 | NA          | NA |             |
| Zg16          | 27.52625572 | 1.946086815 | 0.535363369 | 3.635076524 | 0.000277898 |    | 0.000777039 |
| Gm8648        | 0.345540157 | 1.945335937 | 3.282773379 | 0.592589165 | 0.553456132 | NA |             |
| Ero1lb        | 798.2982174 | 1.945222758 | 0.184434503 | 10.54695694 | 5.25E-26    |    | 1.33E-24    |
| En2           | 0.345217136 | 1.944466503 | 3.608670558 | 0.538886828 | 0.589964947 | NA |             |
| C2cd4d        | 18.70544392 | 1.944426184 | 0.548200682 | 3.546924053 | 0.000389757 |    | 0.001061773 |
| Olfr1418      | 0.345169544 | 1.944395603 | 3.608676948 | 0.538811213 | 0.590017126 | NA |             |
| Tenn1         | 11.89679402 | 1.942233635 | 0.586456196 | 3.311813652 | 0.000926933 |    | 0.00235376  |
| Vmn1r171      | 0.802690171 | 1.941772941 | 2.300593219 | 0.844031411 | 0.398651853 | NA |             |
| Spata22       | 78.45566022 | 1.941430784 | 0.435606725 | 4.456843002 | 8.32E-06    |    | 2.97E-05    |
| Olfr877       | 0.786430529 | 1.940835206 | 2.306890038 | 0.841321074 | 0.400168088 | NA |             |
| Strc          | 1.871607875 | 1.940339865 | 1.648897191 | 1.176750058 | 0.239295282 |    | 0.322720193 |
| Cep85         | 1053.988101 | 1.939977816 | 0.372747472 | 5.204536485 | 1.94E-07    |    | 8.67E-07    |
| Gch1          | 2066.302647 | 1.939426043 | 0.287560249 | 6.744416353 | 1.54E-11    |    | 1.10E-10    |
| Gstk1         | 1361.074178 | 1.93862564  | 0.237433935 | 8.164905481 | 3.22E-16    |    | 3.69E-15    |
| Rslcan18      | 61.63338749 | 1.938251662 | 0.305146568 | 6.351871086 | 2.13E-10    |    | 1.34E-09    |
| Plekhb1       | 303.582606  | 1.937585238 | 0.299135627 | 6.477280088 | 9.34E-11    |    | 6.13E-10    |
| Slc10a4l      | 0.777433496 | 1.937575028 | 2.310476583 | 0.838604053 | 0.401691535 | NA |             |
| Rskr          | 14.77409833 | 1.937288819 | 0.77447861  | 2.501410359 | 0.012369975 |    | 0.024535583 |
| Ugt1a6a       | 1875.577549 | 1.93682475  | 0.362124325 | 5.348507721 | 8.87E-08    |    | 4.09E-07    |
| Hsd17b4       | 4806.413555 | 1.935387925 | 0.187994885 | 10.2948967  | 7.43E-25    |    | 1.74E-23    |
| Chchd7        | 190.3685315 | 1.933734005 | 0.234920526 | 8.2314391   | 1.85E-16    |    | 2.16E-15    |
| Olfr366       | 16.34704644 | 1.929101115 | 0.70316819  | 2.743441958 | 0.00607988  |    | 0.012969193 |
| Slc25a2       | 2.83446365  | 1.927665085 | 1.130030108 | 1.705852854 | 0.08803548  |    | 0.138529523 |
| Bmp2          | 87.3839241  | 1.926984278 | 0.359196896 | 5.364701917 | 8.11E-08    |    | 3.77E-07    |
| Tmem14c       | 1512.680845 | 1.924774433 | 0.16587229  | 11.60395403 | 3.93E-31    |    | 1.51E-29    |
| Fars2         | 396.8444911 | 1.923917743 | 0.29771953  | 6.462181856 | 1.03E-10    |    | 6.73E-10    |
| Angptl3       | 9785.772016 | 1.923651    | 0.312646709 | 6.152794653 | 7.61E-10    |    | 4.49E-09    |
| Fam126b       | 360.1296328 | 1.923295505 | 0.202763663 | 9.485405228 | 2.41E-21    |    | 4.31E-20    |
| Bcl6          | 438.560103  | 1.922872852 | 0.411018862 | 4.678308053 | 2.89E-06    |    | 1.10E-05    |
| Abhd14b       | 2644.992423 | 1.922814941 | 0.187767453 | 10.24040593 | 1.31E-24    |    | 2.97E-23    |
| Olfr808       | 1.018641239 | 1.919021486 | 2.241702951 | 0.856055208 | 0.391967243 | NA |             |
| Trap1a        | 0.64257853  | 1.918021938 | 2.821534366 | 0.679779754 | 0.496643928 | NA |             |
| Dcxr          | 1307.402551 | 1.917910623 | 0.278223178 | 6.893425051 | 5.45E-12    |    | 4.11E-11    |
| Azgp1         | 21632.41929 | 1.916266865 | 0.136447934 | 14.043942   | 8.39E-45    |    | 8.94E-43    |
| Gm44845       | 3.134247148 | 1.916120522 | 1.230735153 | 1.556891032 | 0.119496359 |    | 0.17977179  |
| Dppa5a        | 5.848433053 | 1.915743838 | 1.872418    | 1.023138978 | 0.30624214  |    | 0.396537749 |
| 9130230L23Rik | 9.957603451 | 1.915379863 | 0.601140983 | 3.186240697 | 0.001441346 |    | 0.00351985  |
| Olfr394       | 2.115767951 | 1.914201213 | 1.438465336 | 1.330724604 | 0.183279644 |    | 0.257801269 |
| Vipr1         | 269.2105013 | 1.913952158 | 0.405226969 | 4.723160851 | 2.32E-06    |    | 8.89E-06    |
| Elovl6        | 583.537868  | 1.913149895 | 0.346013962 | 5.52911184  | 3.22E-08    |    | 1.56E-07    |
| Zfp987        | 2.204244559 | 1.912516839 | 1.575721762 | 1.213740195 | 0.22484695  |    | 0.306263247 |
| Robo3         | 9.510115985 | 1.91230825  | 0.636287967 | 3.005413191 | 0.002652203 |    | 0.006110102 |
| Tuba4a        | 2297.576653 | 1.90968734  | 0.133460441 | 14.30901419 | 1.92E-46    |    | 2.20E-44    |
| Slc25a15      | 2924.771192 | 1.90871725  | 0.207472873 | 9.199840051 | 3.58E-20    |    | 5.80E-19    |
| Gne           | 1832.706338 | 1.907699179 | 0.329595455 | 5.788002081 | 7.12E-09    |    | 3.75E-08    |
| Gm20426       | 2.22598526  | 1.906976827 | 1.420327171 | 1.342632082 | 0.179391137 |    | 0.253272058 |
| Bp1fc         | 6.596912899 | 1.906927715 | 0.764286198 | 2.49504403  | 0.01259415  |    | 0.02492513  |
| Olfr961       | 3.600048129 | 1.906798955 | 0.991772535 | 1.92261722  | 0.05452814  |    | 0.090878456 |
| Olfr239       | 1.495951059 | 1.903905922 | 1.498588206 | 1.270466373 | 0.203918554 | NA |             |
| Hibch         | 928.625491  | 1.903748269 | 0.192918284 | 9.86815885  | 5.72E-23    |    | 1.14E-21    |



|               |             |             |             |             |             |    |             |
|---------------|-------------|-------------|-------------|-------------|-------------|----|-------------|
| Gm17085       | 1.10909513  | 1.902863514 | 1.842372044 | 1.032833471 | 0.301681837 | NA |             |
| Rab40b        | 9.953524156 | 1.902662191 | 0.786410375 | 2.419426614 | 0.015544997 |    | 0.030077302 |
| Rpl15-ps2     | 1.679209293 | 1.902464629 | 1.991285921 | 0.955395008 | 0.339377977 |    | 0.431743514 |
| Zic1          | 4.778287235 | 1.902157431 | 0.891345714 | 2.134028808 | 0.032840423 |    | 0.058337348 |
| Gm28344       | 2.215777507 | 1.901328855 | 1.173348856 | 1.620429291 | 0.105140092 |    | 0.16108819  |
| Gm48793       | 9.558980816 | 1.901123109 | 0.604462045 | 3.145148857 | 0.001660023 |    | 0.003995493 |
| Col5a3        | 1795.400811 | 1.900321845 | 0.431416428 | 4.40484349  | 1.06E-05    |    | 3.72E-05    |
| Pla2g2c       | 1.393014719 | 1.900011246 | 1.966171308 | 0.966350815 | 0.333868667 | NA |             |
| F10           | 5276.818101 | 1.899813492 | 0.210952474 | 9.005883901 | 2.14E-19    |    | 3.23E-18    |
| Reep6         | 7687.678205 | 1.898559992 | 0.240537178 | 7.893000203 | 2.95E-15    |    | 3.09E-14    |
| Khk           | 3656.601587 | 1.89814586  | 0.248501423 | 7.638370184 | 2.20E-14    |    | 2.12E-13    |
| Pln           | 0.412625059 | 1.897994246 | 3.639049482 | 0.521563187 | 0.6019745   | NA |             |
| Gstt1         | 3463.968124 | 1.895856249 | 0.190285474 | 9.963221114 | 2.21E-23    |    | 4.58E-22    |
| Tmem254b      | 2625.590274 | 1.895499192 | 0.333560438 | 5.682625917 | 1.33E-08    |    | 6.76E-08    |
| ldh1          | 5266.873427 | 1.894449466 | 0.237973336 | 7.960763587 | 1.71E-15    |    | 1.84E-14    |
| Ripply1       | 6.896214317 | 1.893833171 | 0.711614684 | 2.661318287 | 0.007783534 |    | 0.016215775 |
| Olfr668       | 1.859652382 | 1.893069571 | 1.639393227 | 1.154737948 | 0.248197755 |    | 0.332281712 |
| Gas1          | 139.8069695 | 1.892009714 | 0.494932085 | 3.822766339 | 0.000131963 |    | 0.000390641 |
| Slitrk4       | 1.3418195   | 1.891979423 | 1.766050516 | 1.071305382 | 0.28403214  | NA |             |
| Tdgf1         | 3.384844041 | 1.891054365 | 1.896110813 | 0.997333253 | 0.318602778 |    | 0.410006596 |
| Ren1          | 43.31285317 | 1.890993981 | 0.41666399  | 4.538414707 | 5.67E-06    |    | 2.07E-05    |
| Prodh2        | 2932.525014 | 1.890839437 | 0.129618029 | 14.58778116 | 3.36E-48    |    | 4.41E-46    |
| Olfr1263      | 1.068354922 | 1.890637101 | 2.084789231 | 0.906872058 | 0.364474459 | NA |             |
| Nplpa1        | 347.0248505 | 1.890286627 | 0.269796344 | 7.006346342 | 2.45E-12    |    | 1.92E-11    |
| Hsd17b10      | 2227.769242 | 1.889708888 | 0.150997582 | 12.51482877 | 6.19E-36    |    | 3.37E-34    |
| Rtn4ip1       | 321.636339  | 1.889345469 | 0.146712305 | 12.87789368 | 5.99E-38    |    | 3.80E-36    |
| Olfr1178      | 13.66387872 | 1.888911271 | 0.507944217 | 3.718737623 | 0.000200221 |    | 0.000575222 |
| Mafb          | 890.82684   | 1.8884071   | 0.26311774  | 7.177042101 | 7.12E-13    |    | 5.94E-12    |
| Gm11127       | 7.485436545 | 1.887958806 | 0.820023547 | 2.302322673 | 0.021316982 |    | 0.039786721 |
| Tmem56        | 1832.287719 | 1.886333204 | 0.326880455 | 5.770712728 | 7.89E-09    |    | 4.14E-08    |
| Ebp           | 2962.36224  | 1.885464011 | 0.184539172 | 10.21714788 | 1.66E-24    |    | 3.76E-23    |
| Pemt          | 2876.103181 | 1.885227077 | 0.176615992 | 10.67415841 | 1.34E-26    |    | 3.57E-25    |
| Sco2          | 797.3515949 | 1.883007303 | 0.181765981 | 10.35951442 | 3.79E-25    |    | 9.05E-24    |
| BCO23105      | 56.65403583 | 1.882411186 | 0.574844794 | 3.274642487 | 0.001057958 |    | 0.002653923 |
| Pcbd2         | 258.5690992 | 1.881802979 | 0.248473333 | 7.57346052  | 3.63E-14    |    | 3.44E-13    |
| Plin2         | 4850.345478 | 1.881040753 | 0.32667172  | 5.758198936 | 8.50E-09    |    | 4.44E-08    |
| Olfr45        | 21.16998504 | 1.880819678 | 0.535167561 | 3.514450083 | 0.000440665 |    | 0.001188305 |
| 1700066M21Rik | 373.2209842 | 1.880808427 | 0.239664145 | 7.847683806 | 4.24E-15    |    | 4.38E-14    |
| Fxyd1         | 3179.639694 | 1.878407594 | 0.218387051 | 8.601277325 | 7.88E-18    |    | 1.05E-16    |
| Lcat          | 4313.274717 | 1.878407448 | 0.172042384 | 10.9182831  | 9.43E-28    |    | 2.76E-26    |
| Echdc2        | 3738.821076 | 1.87826144  | 0.176517824 | 10.64063333 | 1.93E-26    |    | 5.04E-25    |
| Hagh          | 3536.819858 | 1.877595564 | 0.223583606 | 8.397733615 | 4.55E-17    |    | 5.67E-16    |
| Zbtb8os       | 476.8608603 | 1.876508343 | 0.272707728 | 6.881023723 | 5.94E-12    |    | 4.46E-11    |
| Tceal3        | 0.75115391  | 1.875193858 | 2.789213257 | 0.672302074 | 0.50139141  | NA |             |
| Mst1          | 2742.814767 | 1.875052492 | 0.171299181 | 10.94606802 | 6.94E-28    |    | 2.05E-26    |
| Gm47103       | 8.759275104 | 1.874852664 | 0.813420834 | 2.304898752 | 0.021172245 |    | 0.039533891 |
| Ndrp2         | 15135.17454 | 1.873824026 | 0.308672458 | 6.070590298 | 1.27E-09    |    | 7.33E-09    |
| Gstt2         | 1331.981144 | 1.873493926 | 0.287349468 | 6.519914365 | 7.03E-11    |    | 4.69E-10    |
| B3galt1       | 295.2524386 | 1.873205157 | 0.768722888 | 2.436775576 | 0.014818873 |    | 0.028783428 |
| Hes6          | 975.8160947 | 1.873187024 | 0.193447953 | 9.683157624 | 3.56E-22    |    | 6.73E-21    |
| Proca1        | 54.44430215 | 1.871333484 | 0.462477805 | 4.046320632 | 5.20E-05    |    | 0.000164257 |
| Epm2a         | 54.20355745 | 1.871134836 | 0.358315677 | 5.222028939 | 1.77E-07    |    | 7.93E-07    |
| Sephs2        | 11739.59893 | 1.870906085 | 0.202679351 | 9.230866748 | 2.68E-20    |    | 4.39E-19    |
| Dpp10         | 25.05426255 | 1.870883281 | 0.415156914 | 4.506448573 | 6.59E-06    |    | 2.39E-05    |
| Nlrp6         | 4040.000679 | 1.870616905 | 0.284891869 | 6.566059301 | 5.17E-11    |    | 3.50E-10    |
| Gm14124       | 1.700762407 | 1.870508618 | 2.069740719 | 0.903740551 | 0.366132991 |    | 0.458553867 |
| Nme9          | 0.423644744 | 1.869908913 | 3.088672844 | 0.605408539 | 0.544907579 | NA |             |
| P2rx3         | 25.62419562 | 1.86834964  | 0.504046852 | 3.706698358 | 0.000209979 |    | 0.000601027 |
| Gm43738       | 20.72489832 | 1.867417907 | 0.578001073 | 3.230820831 | 0.001234353 |    | 0.003059946 |
| Gbp10         | 94.25753141 | 1.86738709  | 0.720033126 | 2.593473858 | 0.009501176 |    | 0.01939676  |
| Gm12463       | 0.59084349  | 1.867297783 | 3.496867005 | 0.53399165  | 0.593347311 | NA |             |
| Fbp1          | 6203.585638 | 1.865314935 | 0.43564669  | 4.281714925 | 1.85E-05    |    | 6.28E-05    |
| Gm45588       | 0.424988098 | 1.865103823 | 3.607153295 | 0.517056989 | 0.605116377 | NA |             |
| Gm7909        | 0.436768041 | 1.864942432 | 3.068224484 | 0.607824637 | 0.543303788 | NA |             |
| Gm13226       | 0.918419445 | 1.864185419 | 1.954573238 | 0.953755726 | 0.340207305 | NA |             |
| Pzp           | 65860.28347 | 1.863714244 | 0.218980355 | 8.510874153 | 1.73E-17    |    | 2.24E-16    |

|          |             |             |             |             |                |             |
|----------|-------------|-------------|-------------|-------------|----------------|-------------|
| Hmgcl    | 2076.3299   | 1.862858651 | 0.200336819 | 9.298633454 | 1.42E-20       | 2.38E-19    |
| Impg2    | 51.51530496 | 1.862430337 | 0.453153164 | 4.109935632 | 3.96E-05       | 0.000127544 |
| Ccl25    | 126.7826788 | 1.862225369 | 0.193063246 | 9.645675203 | 5.13E-22       | 9.59E-21    |
| Mettl7a1 | 3851.524358 | 1.861320126 | 0.244844626 | 7.602046065 | 2.91E-14       | 2.78E-13    |
| Gm3756   | 0.436706645 | 1.861192998 | 3.068573504 | 0.606533621 | 0.544160464 NA |             |
| Zfp976   | 69.67864471 | 1.86091186  | 0.32374324  | 5.748110323 | 9.02E-09       | 4.71E-08    |
| Gm19963  | 0.429509481 | 1.860622455 | 3.079963922 | 0.604105276 | 0.545773652 NA |             |
| Gm4799   | 0.413374208 | 1.860101513 | 3.107071794 | 0.598667052 | 0.549394932 NA |             |
| Herpud1  | 6414.442843 | 1.859388914 | 0.343451285 | 5.413835945 | 6.17E-08       | 2.90E-07    |
| Olfr1537 | 0.429474811 | 1.859156769 | 3.080122992 | 0.603598224 | 0.546110794 NA |             |
| Gm14371  | 0.413316247 | 1.858719695 | 3.107172461 | 0.598202938 | 0.549704531 NA |             |
| Mpl      | 0.429458706 | 1.858530752 | 3.080192761 | 0.603381313 | 0.546255051 NA |             |
| Gm11545  | 0.437329873 | 1.858154849 | 3.607229094 | 0.515119722 | 0.606469362 NA |             |
| Gm7075   | 0.431361193 | 1.857860861 | 3.606876864 | 0.515088519 | 0.606491165 NA |             |
| Wnt9b    | 13.57089515 | 1.857139519 | 0.746632501 | 2.487354243 | 0.012869718    | 0.025382109 |
| Crp      | 4509.79494  | 1.85653634  | 0.274739356 | 6.757445917 | 1.40E-11       | 1.01E-10    |
| Gm7308   | 0.437109167 | 1.856340356 | 3.607248961 | 0.514613872 | 0.606822869 NA |             |
| Chil1    | 2.411376269 | 1.855823864 | 1.254897066 | 1.47886541  | 0.13917629     | 0.204136401 |
| Pcmtd1   | 1617.861631 | 1.855254892 | 0.178825823 | 10.37464759 | 3.23E-25       | 7.75E-24    |
| Fbxw20   | 0.424857937 | 1.855205125 | 3.606905589 | 0.514348124 | 0.607008621 NA |             |
| Olfr1342 | 4.936906733 | 1.854856919 | 1.174320744 | 1.579514735 | 0.114218039    | 0.173098865 |
| Ghrh     | 0.414720378 | 1.853928413 | 3.606919422 | 0.51399219  | 0.607257451 NA |             |
| Trip4    | 758.418487  | 1.853551898 | 0.233625183 | 7.933870296 | 2.12E-15       | 2.26E-14    |
| Gm29423  | 0.609997852 | 1.852644452 | 3.500884631 | 0.529193232 | 0.596671411 NA |             |
| Rimklb   | 0.430700787 | 1.852633723 | 3.606933465 | 0.513631244 | 0.607509831 NA |             |
| Slc26a1  | 1923.81517  | 1.852628087 | 0.212599519 | 8.714168757 | 2.93E-18       | 4.03E-17    |
| Best4-ps | 0.430699294 | 1.852621851 | 3.606933594 | 0.513627934 | 0.607512145 NA |             |
| Gm47736  | 0.587674271 | 1.852294113 | 2.875149863 | 0.644242631 | 0.51941811 NA  |             |
| Ddc      | 1267.272405 | 1.851799153 | 0.336087669 | 5.509869376 | 3.59E-08       | 1.74E-07    |
| Saxo1    | 0.414375051 | 1.851417862 | 3.606946668 | 0.513292275 | 0.607746887 NA |             |
| Gm42814  | 4.737323841 | 1.850816498 | 0.834176192 | 2.218735701 | 0.026504711    | 0.048233594 |
| Isoc2a   | 1816.84545  | 1.850550103 | 0.163345374 | 11.32906345 | 9.42E-30       | 3.26E-28    |
| Gm973    | 0.429194091 | 1.850235683 | 3.60731603  | 0.512912001 | 0.608012878 NA |             |
| Rarres2  | 6770.486436 | 1.850165263 | 0.429986501 | 4.302844992 | 1.69E-05       | 5.75E-05    |
| Gm16060  | 0.41306489  | 1.850092555 | 3.607317606 | 0.5128721   | 0.608040791 NA |             |
| Gm3272   | 19.32972074 | 1.850002299 | 0.521059339 | 3.550463757 | 0.000384553    | 0.001049441 |
| Slc6a5   | 3.570014492 | 1.849393596 | 0.944663478 | 1.957727423 | 0.050262006    | 0.084754369 |
| Gm10563  | 0.587992515 | 1.849199983 | 2.874868801 | 0.643229347 | 0.520075293 NA |             |
| Krt42    | 0.720980043 | 1.848830022 | 2.754143203 | 0.671290447 | 0.502035519 NA |             |
| Tmem88b  | 67.85522858 | 1.848633308 | 0.327451885 | 5.645511272 | 1.65E-08       | 8.30E-08    |
| Gm8520   | 0.428974177 | 1.848477539 | 3.607335411 | 0.512421865 | 0.608355792 NA |             |
| Abhd18   | 378.1978058 | 1.848225551 | 0.287642896 | 6.425416995 | 1.32E-10       | 8.48E-10    |
| Pkd113   | 0.586084786 | 1.84787728  | 3.504495309 | 0.527287703 | 0.597993813 NA |             |
| Gm5983   | 0.412652322 | 1.847074044 | 3.607350903 | 0.512030599 | 0.608629594 NA |             |
| Rgs13    | 0.4359753   | 1.846919616 | 3.607352609 | 0.511987548 | 0.608659725 NA |             |
| Gm5539   | 0.412558684 | 1.846386966 | 3.607358494 | 0.511839056 | 0.608763654 NA |             |
| Mgmt     | 255.2495401 | 1.846368721 | 0.232237085 | 7.950361249 | 1.86E-15       | 1.99E-14    |
| Gm17132  | 57.33708552 | 1.845711176 | 0.346546463 | 5.326013602 | 1.00E-07       | 4.61E-07    |
| Hba-a1   | 899.4505208 | 1.845441063 | 0.423003897 | 4.362704642 | 1.28E-05       | 4.45E-05    |
| Gm18990  | 0.412425645 | 1.845409489 | 3.607369301 | 0.511566556 | 0.608954397 NA |             |
| Hspb6    | 246.5891434 | 1.845165283 | 0.231924114 | 7.955900974 | 1.78E-15       | 1.91E-14    |
| Cdk15    | 3.64743661  | 1.845124857 | 1.068947333 | 1.726113907 | 0.084326922    | 0.133333832 |
| Ahcy     | 26188.28897 | 1.844644639 | 0.371474096 | 4.965742318 | 6.84E-07       | 2.82E-06    |
| Tspan33  | 172.530518  | 1.844437141 | 0.387315707 | 4.762102611 | 1.92E-06       | 7.42E-06    |
| Pex11g   | 780.3826831 | 1.844115765 | 0.131527056 | 14.0208093  | 1.16E-44       | 1.21E-42    |
| Mmab     | 574.6791416 | 1.843105955 | 0.163224409 | 11.29185254 | 1.44E-29       | 4.89E-28    |
| Slc25a20 | 1427.202119 | 1.842020636 | 0.21788716  | 8.454011883 | 2.81E-17       | 3.58E-16    |
| Gm15950  | 1.782339966 | 1.841902303 | 1.404877627 | 1.311076686 | 0.189831856    | 0.265562672 |
| Pmvk     | 546.7103755 | 1.841431742 | 0.172095045 | 10.7000858  | 1.02E-26       | 2.73E-25    |
| Gm15399  | 0.894617049 | 1.841397281 | 2.162526557 | 0.851502736 | 0.394490144 NA |             |
| G0s2     | 770.918093  | 1.841334596 | 0.302974987 | 6.07751358  | 1.22E-09       | 7.03E-09    |
| Tmem269  | 3.094007317 | 1.841178239 | 1.201812362 | 1.532001414 | 0.125522086    | 0.18733262  |
| Gm17509  | 3.489554296 | 1.841038277 | 1.189854704 | 1.547279908 | 0.121759764    | 0.182634725 |
| Papss2   | 2041.190909 | 1.840430904 | 0.233127106 | 7.894538464 | 2.91E-15       | 3.05E-14    |
| Vmn1r16  | 4.752727935 | 1.839879951 | 0.942369353 | 1.952397906 | 0.050890981    | 0.085713244 |
| Car14    | 839.5909392 | 1.839530015 | 0.260115949 | 7.071961653 | 1.53E-12       | 1.23E-11    |

|               |             |             |             |             |                |             |
|---------------|-------------|-------------|-------------|-------------|----------------|-------------|
| Mtpp          | 3010.838968 | 1.839126269 | 0.293616546 | 6.263701052 | 3.76E-10       | 2.29E-09    |
| Olfr417       | 1.131889679 | 1.838774808 | 2.153348893 | 0.853914019 | 0.393152631 NA |             |
| Gp6           | 9.388507955 | 1.838491884 | 0.609499855 | 3.016394294 | 0.002558004    | 0.005913866 |
| Gm8506        | 0.719202806 | 1.838426253 | 2.749138058 | 0.668728239 | 0.50366885 NA  |             |
| Gm12174       | 0.477424781 | 1.837752107 | 3.057691512 | 0.601026003 | 0.547822667 NA |             |
| Gm18132       | 1.946149684 | 1.83710326  | 1.916574522 | 0.95853474  | 0.337793183    | 0.430010318 |
| Olfr796       | 2.914528475 | 1.836003386 | 1.04912123  | 1.750039302 | 0.080111532    | 0.127362484 |
| Zfp992        | 127.1790755 | 1.835043231 | 0.310952475 | 5.901362354 | 3.61E-09       | 1.97E-08    |
| Coch          | 0.763087259 | 1.834969111 | 2.258488603 | 0.812476587 | 0.416518216 NA |             |
| Cyp21a2-ps    | 154.2568938 | 1.834869418 | 0.381162855 | 4.81387259  | 1.48E-06       | 5.83E-06    |
| Fam210a       | 979.0852308 | 1.831856972 | 0.187493249 | 9.770255623 | 1.51E-22       | 2.94E-21    |
| Kcnn1         | 47.30128247 | 1.831539504 | 0.560767791 | 3.266128214 | 0.001090289    | 0.002729404 |
| Hectd3        | 927.8162195 | 1.83089917  | 0.225341125 | 8.125011233 | 4.47E-16       | 5.06E-15    |
| Vmn1r210      | 7.731609086 | 1.830262852 | 0.736798991 | 2.484073504 | 0.012988899    | 0.025590519 |
| Cox7b         | 3057.813522 | 1.830011833 | 0.212556748 | 8.60952122  | 7.34E-18       | 9.81E-17    |
| Gm28356       | 0.751396108 | 1.829882122 | 2.018144863 | 0.906714952 | 0.364557555 NA |             |
| Col25a1       | 11.8768673  | 1.828365065 | 0.656332474 | 2.785730002 | 0.005340734    | 0.011547093 |
| H2ac18        | 288.4196624 | 1.828187319 | 0.418120911 | 4.372389114 | 1.23E-05       | 4.27E-05    |
| Gm15041       | 0.764662393 | 1.827182295 | 2.006882018 | 0.910458253 | 0.362580889 NA |             |
| Olfr1012      | 0.875049676 | 1.82599317  | 2.615758234 | 0.698074136 | 0.485130832 NA |             |
| Mdh1          | 8068.451795 | 1.82582584  | 0.16309593  | 11.19479709 | 4.32E-29       | 1.39E-27    |
| Btbd16        | 7.768877005 | 1.825282073 | 0.757088745 | 2.410922214 | 0.015912242    | 0.030700758 |
| Aldh5a1       | 828.1554717 | 1.825203119 | 0.234301088 | 7.789989929 | 6.70E-15       | 6.78E-14    |
| Rpp40         | 139.363562  | 1.824272858 | 0.334348805 | 5.456196728 | 4.86E-08       | 2.32E-07    |
| Olfr6         | 2.843057025 | 1.823309813 | 1.187677139 | 1.535189787 | 0.124737216    | 0.186406036 |
| Hs3st3b1      | 766.855274  | 1.823279808 | 0.194019503 | 9.397404817 | 5.59E-21       | 9.65E-20    |
| A1bg          | 1.118875388 | 1.821819553 | 3.008762561 | 0.605504594 | 0.544843773 NA |             |
| Gm6882        | 16.09661109 | 1.82178023  | 1.152304599 | 1.580988422 | 0.113880685    | 0.172648992 |
| Scap          | 1421.106047 | 1.821522523 | 0.174009337 | 10.46795851 | 1.21E-25       | 3.00E-24    |
| Gm14300       | 1.154577345 | 1.821132734 | 2.136528149 | 0.852379471 | 0.39400351 NA  |             |
| Rhox4a        | 1.198817325 | 1.821013563 | 1.751464212 | 1.039709262 | 0.298474996 NA |             |
| Etnk2         | 3653.637182 | 1.820609246 | 0.629332366 | 2.892921682 | 0.003816765    | 0.008514551 |
| Slc25a1       | 2833.662982 | 1.820585895 | 0.186177047 | 9.778788113 | 1.39E-22       | 2.71E-21    |
| Blvrb         | 1850.944703 | 1.819480861 | 0.260668407 | 6.980059007 | 2.95E-12       | 2.29E-11    |
| Gm7816        | 1.809234564 | 1.819416473 | 1.638960761 | 1.110103742 | 0.266954325    | 0.353067287 |
| Mroh2a        | 23.16747388 | 1.818616073 | 0.531391538 | 3.42236551  | 0.000620788    | 0.001629939 |
| Olfr259       | 6.206116817 | 1.817220321 | 0.881460811 | 2.061600808 | 0.039245757    | 0.068271599 |
| Gm17333       | 1.621185669 | 1.8170068   | 1.383718836 | 1.313132953 | 0.189138152 NA |             |
| Serpinc1      | 27122.71998 | 1.815741431 | 0.209922924 | 8.649562396 | 5.17E-18       | 6.98E-17    |
| A930018P22Rik | 2.631105804 | 1.815636964 | 1.317513937 | 1.378077994 | 0.168179209    | 0.239625504 |
| Gstz1         | 8464.433931 | 1.81421363  | 0.181701509 | 9.984582081 | 3.78E-23       | 3.73E-22    |
| Ccdc169       | 3.854851004 | 1.813591692 | 0.914255088 | 1.983682362 | 0.047291261    | 0.08046925  |
| Gstm6         | 1714.145624 | 1.813566206 | 0.299689939 | 6.051475103 | 1.44E-09       | 8.19E-09    |
| Hykk          | 1020.759662 | 1.813070373 | 0.302056541 | 6.002420492 | 1.94E-09       | 1.09E-08    |
| Zfp42         | 5.537001478 | 1.812912996 | 1.478485346 | 1.226196121 | 0.220124881    | 0.300840866 |
| Acadvl        | 4428.634414 | 1.811893507 | 0.199489056 | 9.08267124  | 1.06E-19       | 1.64E-18    |
| Mrap          | 783.2066697 | 1.810082019 | 0.377030394 | 4.80089152  | 1.58E-06       | 6.19E-06    |
| Ndufv3        | 1435.163503 | 1.809980123 | 0.191878201 | 9.432963785 | 3.99E-21       | 6.98E-20    |
| Mapk15        | 421.5597098 | 1.809929302 | 0.313395248 | 5.775228928 | 7.68E-09       | 4.03E-08    |
| Bnip3         | 2327.007066 | 1.80900251  | 0.308926896 | 5.85576243  | 4.75E-09       | 2.55E-08    |
| Slc38a4       | 12676.79176 | 1.80853443  | 0.266624566 | 6.783075019 | 1.18E-11       | 8.54E-11    |
| Glt28d2       | 59.42955969 | 1.808365055 | 0.456372345 | 3.962477299 | 7.42E-05       | 0.000229003 |
| Brap          | 1651.638535 | 1.808328689 | 0.162511229 | 11.12740764 | 9.23E-29       | 2.91E-27    |
| Hc            | 12957.97554 | 1.808210077 | 0.279562146 | 6.468007574 | 9.93E-11       | 6.49E-10    |
| Nat2          | 263.7014733 | 1.807863905 | 0.208561191 | 8.668266099 | 4.39E-18       | 5.96E-17    |
| Wnt2          | 15.37256945 | 1.807841883 | 1.049140293 | 1.723165047 | 0.084858683    | 0.134087573 |
| Gm48786       | 39.87743817 | 1.807498984 | 0.331129044 | 5.458593912 | 4.80E-08       | 2.29E-07    |
| Rgs7          | 3.606605769 | 1.807283125 | 1.195601978 | 1.511609346 | 0.130633273    | 0.193739542 |
| Ttll8         | 10.27895683 | 1.807062786 | 1.083604456 | 1.667640601 | 0.095387093    | 0.148331585 |
| Gm7309        | 15.58948779 | 1.805890154 | 1.029650416 | 1.753886685 | 0.079449926    | 0.126455264 |
| Acaa1a        | 3170.354699 | 1.805765377 | 0.180265685 | 10.01724414 | 1.28E-23       | 2.71E-22    |
| Tfap2a        | 9.622514756 | 1.804235537 | 0.655652318 | 2.751817521 | 0.005926553    | 0.012680029 |
| H2-Ke6        | 1194.09086  | 1.804116658 | 0.14304609  | 12.61213541 | 1.81E-36       | 1.04E-34    |
| Ndufb5        | 1307.789737 | 1.803687524 | 0.185323335 | 9.732651963 | 2.19E-22       | 4.21E-21    |
| Slc35d2       | 655.7936488 | 1.80023125  | 0.217903256 | 8.261607837 | 1.44E-16       | 1.70E-15    |
| Crot          | 8110.186282 | 1.799829249 | 0.314999826 | 5.713746803 | 1.11E-08       | 5.69E-08    |

|               |             |             |             |             |             |             |
|---------------|-------------|-------------|-------------|-------------|-------------|-------------|
| Mpc1          | 2663.201721 | 1.799373449 | 0.099860262 | 18.01891369 | 1.38E-72    | 7.61E-70    |
| Zfp2          | 78.10293788 | 1.799135774 | 0.227793421 | 7.89810245  | 2.83E-15    | 2.97E-14    |
| Oit3          | 124.4379998 | 1.797968921 | 0.472730958 | 3.803366146 | 0.000142743 | 0.000420727 |
| Fgf1          | 1039.032457 | 1.796934739 | 0.14824948  | 12.12101884 | 8.17E-34    | 3.85E-32    |
| Acaa2         | 10564.17976 | 1.796740438 | 0.169626564 | 10.59232937 | 3.23E-26    | 8.30E-25    |
| Car11         | 12.14666411 | 1.796378316 | 0.74577695  | 2.408734028 | 0.016007959 | 0.030860985 |
| Fam71d        | 2.032332948 | 1.795714532 | 1.619820207 | 1.108588795 | 0.267607614 | 0.353834975 |
| Vmn1r50       | 1.483098005 | 1.795594705 | 2.047625677 | 0.876915505 | 0.380532534 | NA          |
| Gm13464       | 2.931143844 | 1.795106402 | 1.508272343 | 1.190173917 | 0.233978043 | 0.316751979 |
| Nyx           | 6.403857945 | 1.792270138 | 0.751144606 | 2.386052063 | 0.01703034  | 0.032566824 |
| Mug1          | 43127.26177 | 1.791719798 | 0.461453254 | 3.882776387 | 0.000103271 | 0.000311548 |
| 3110021N24Rik | 4.773935558 | 1.79163783  | 0.869283161 | 2.061052037 | 0.039298076 | 0.068348663 |
| Acot11        | 107.6230378 | 1.790562467 | 0.371867731 | 4.815052015 | 1.47E-06    | 5.80E-06    |
| Pde4c         | 423.1832661 | 1.790468551 | 0.27420871  | 6.529583061 | 6.60E-11    | 4.41E-10    |
| Gm7435        | 1.849878182 | 1.789837359 | 1.773811493 | 1.009034706 | 0.31295799  | 0.404127922 |
| Iah1          | 1138.005836 | 1.789323359 | 0.175324487 | 10.20578122 | 1.87E-24    | 4.21E-23    |
| Lcn8          | 2.602337276 | 1.789247883 | 1.520835577 | 1.176490023 | 0.239399117 | 0.322783624 |
| Sod2          | 2427.373296 | 1.788612305 | 0.147138944 | 12.15594091 | 5.33E-34    | 2.53E-32    |
| Ces1d         | 6815.737446 | 1.78841466  | 0.228874954 | 7.813937828 | 5.54E-15    | 5.65E-14    |
| Cyp4b1        | 95.20660996 | 1.788001369 | 0.399098723 | 4.480097948 | 7.46E-06    | 2.68E-05    |
| Txndc15       | 1077.999977 | 1.786863272 | 0.157300788 | 11.3595316  | 6.65E-30    | 2.34E-28    |
| Cox6a1        | 3871.720321 | 1.786204563 | 0.139601023 | 12.79506786 | 1.75E-37    | 1.07E-35    |
| Mreg          | 531.7513593 | 1.785613536 | 0.262679599 | 6.797686401 | 1.06E-11    | 7.77E-11    |
| Hsd17b7       | 823.816317  | 1.783654624 | 0.244972306 | 7.281045979 | 3.31E-13    | 2.84E-12    |
| Vmn1r213      | 18.11982494 | 1.782776281 | 0.493178834 | 3.614867787 | 0.000300501 | 0.000834219 |
| Iggap2        | 3062.106504 | 1.781636997 | 0.214903507 | 8.29040447  | 1.13E-16    | 1.35E-15    |
| Olfr414       | 4.399214088 | 1.77978332  | 0.910584642 | 1.954550118 | 0.050636194 | 0.085351575 |
| Slc6a9        | 408.7820076 | 1.779734603 | 0.158087816 | 11.25788596 | 2.12E-29    | 7.07E-28    |
| Clybl         | 549.7333862 | 1.774206252 | 0.270537942 | 6.558068115 | 5.45E-11    | 3.68E-10    |
| Suox          | 1466.270218 | 1.773728413 | 0.231597591 | 7.658665206 | 1.88E-14    | 1.82E-13    |
| H4c14         | 6.69257145  | 1.773636947 | 0.722851723 | 2.453666349 | 0.014140812 | 0.027607943 |
| Pde8b         | 13.63311547 | 1.771912347 | 0.557653316 | 3.177444296 | 0.001485792 | 0.003613048 |
| Gm5559        | 6.574344894 | 1.770667234 | 1.15080807  | 1.53862949  | 0.123894775 | 0.185309539 |
| Rpl36-ps2     | 1.042312346 | 1.770059792 | 1.922163026 | 0.920868713 | 0.357118975 | NA          |
| Gm10916       | 1.200834158 | 1.768733713 | 2.427881991 | 0.728508931 | 0.466302104 | NA          |
| Gsto2         | 3.254578331 | 1.768195231 | 1.217696721 | 1.452081787 | 0.146478865 | 0.213524728 |
| Olfr251       | 1.32330092  | 1.767981363 | 2.047223718 | 0.863599492 | 0.387807943 | NA          |
| Gdf15         | 1051.805829 | 1.76740058  | 0.414844487 | 4.260393071 | 2.04E-05    | 6.87E-05    |
| Tchh          | 4.997910222 | 1.767159487 | 0.872497334 | 2.025403882 | 0.042825909 | 0.073702413 |
| Scrn2         | 600.673364  | 1.766620542 | 0.193004966 | 9.153238799 | 5.53E-20    | 8.76E-19    |
| Bckdhh        | 1064.460864 | 1.766578528 | 0.219566735 | 8.045747598 | 8.57E-16    | 9.47E-15    |
| Cox7c         | 2657.483312 | 1.7664861   | 0.152575662 | 11.5777712  | 5.34E-31    | 2.03E-29    |
| Gm28438       | 5662.668788 | 1.76644427  | 0.343172733 | 5.147391095 | 2.64E-07    | 1.15E-06    |
| Gm5096        | 46.75277825 | 1.766102411 | 0.633037908 | 2.789884125 | 0.005272691 | 0.011407212 |
| Olfr731       | 25.97704949 | 1.765907357 | 0.47488352  | 3.718611577 | 0.000200321 | 0.000575412 |
| Pcyt2         | 9281.967727 | 1.765840393 | 0.209427071 | 8.431767611 | 3.40E-17    | 4.29E-16    |
| Etfhd         | 2916.145566 | 1.765171713 | 0.227690755 | 7.752496211 | 9.01E-15    | 9.02E-14    |
| Teddm1b       | 7.747648585 | 1.765009252 | 0.640439711 | 2.755933497 | 0.005852489 | 0.012542205 |
| Pou3f3        | 2.670531785 | 1.764898707 | 1.087543528 | 1.622830407 | 0.104625664 | 0.160429782 |
| Bhmt          | 69879.82491 | 1.763373198 | 0.720177005 | 2.448527496 | 0.014344148 | 0.027963298 |
| Gm44805       | 253.2744078 | 1.762915457 | 0.402989379 | 4.37459533  | 1.22E-05    | 4.23E-05    |
| Trp53inp2     | 3019.076026 | 1.761515775 | 0.185460443 | 9.498067336 | 2.14E-21    | 3.83E-20    |
| Itih1         | 7639.964404 | 1.761348714 | 0.270339249 | 6.515327403 | 7.25E-11    | 4.82E-10    |
| Rdh9          | 794.4517282 | 1.760224131 | 0.336554543 | 5.230130351 | 1.69E-07    | 7.60E-07    |
| Gm8935        | 1.611235126 | 1.760214987 | 1.411419265 | 1.247124104 | 0.212351996 | NA          |
| Galt          | 953.3442854 | 1.756664659 | 0.224026704 | 7.841318141 | 4.46E-15    | 4.59E-14    |
| Olfr5         | 0.700456696 | 1.755578961 | 2.353311667 | 0.746003594 | 0.455665244 | NA          |
| Olfr46        | 52.6641888  | 1.754291346 | 0.364249739 | 4.816177353 | 1.46E-06    | 5.77E-06    |
| Gm47967       | 14.21424334 | 1.754185777 | 0.58861542  | 2.980189981 | 0.002880697 | 0.006594617 |
| Gm48208       | 1.752922822 | 1.75398787  | 1.990177283 | 0.881322426 | 0.378143332 | 0.47014203  |
| Nsd3          | 1472.269193 | 1.753803437 | 0.186312372 | 9.413241955 | 4.81E-21    | 8.36E-20    |
| Ocel1         | 153.0677723 | 1.753666718 | 0.311537632 | 5.629068643 | 1.81E-08    | 9.10E-08    |
| Gm6505        | 4.769095128 | 1.752960829 | 1.339046224 | 1.309111514 | 0.19049658  | 0.266282854 |
| Cadps         | 1.971914382 | 1.751440154 | 1.223349638 | 1.431675867 | 0.152236606 | 0.220578757 |
| Tas1r1        | 0.887371945 | 1.751086696 | 2.21244064  | 0.791472849 | 0.428668114 | NA          |
| Gpr146        | 1043.811971 | 1.750999619 | 0.139500103 | 12.55195936 | 3.88E-36    | 2.15E-34    |

|               |             |             |             |             |                |             |
|---------------|-------------|-------------|-------------|-------------|----------------|-------------|
| Rimbp2        | 15.94800962 | 1.749971135 | 0.531445149 | 3.292853721 | 0.000991761    | 0.002502966 |
| 4930519G04Rik | 3.337273099 | 1.749951439 | 1.17435335  | 1.490140458 | 0.136187308    | 0.20058912  |
| Rdh1          | 9.451245671 | 1.749734313 | 0.677408067 | 2.58298417  | 0.009794982    | 0.019917086 |
| Uros          | 326.4149362 | 1.747382522 | 0.22811111  | 7.660225416 | 1.86E-14       | 1.80E-13    |
| Hamp          | 5579.905595 | 1.747251608 | 0.419321051 | 4.166858794 | 3.09E-05       | 0.000101107 |
| Ndufaf4       | 434.1785978 | 1.747035408 | 0.188435936 | 9.271243295 | 1.84E-20       | 3.05E-19    |
| Tnxb          | 97.40419788 | 1.746659052 | 0.336741549 | 5.186942501 | 2.14E-07       | 9.45E-07    |
| Mlx           | 8.805624193 | 1.746153414 | 1.008373643 | 1.731653169 | 0.083335333    | 0.131949546 |
| Cd55b         | 2.88956408  | 1.746086478 | 1.217540729 | 1.434109296 | 0.151541075    | 0.219832561 |
| Akr7a5        | 1728.009014 | 1.745311157 | 0.142020516 | 12.2891481  | 1.04E-34       | 5.18E-33    |
| Myorg         | 364.5053709 | 1.745137598 | 0.278240383 | 6.27205002  | 3.56E-10       | 2.18E-09    |
| Slc25a22      | 2062.94419  | 1.743645821 | 0.213668779 | 8.160508188 | 3.34E-16       | 3.82E-15    |
| Gm5917        | 1.094415631 | 1.743411983 | 2.081507241 | 0.837571904 | 0.402271178 NA |             |
| Gm4951        | 987.9419649 | 1.743098927 | 0.269429636 | 6.469588705 | 9.83E-11       | 6.43E-10    |
| Gm9803        | 255.3313171 | 1.740656514 | 0.278212638 | 6.256568821 | 3.94E-10       | 2.39E-09    |
| Dera          | 803.2956192 | 1.740405096 | 0.158921993 | 10.95131682 | 6.55E-28       | 1.94E-26    |
| Dexi          | 329.1179967 | 1.738608706 | 0.24228826  | 7.175786007 | 7.19E-13       | 5.98E-12    |
| Cmtm8         | 557.7960468 | 1.738290284 | 0.159660882 | 10.88738993 | 1.32E-27       | 3.79E-26    |
| Cd209f        | 2.40187767  | 1.737257948 | 1.459209492 | 1.190547318 | 0.233831344    | 0.316578522 |
| Slc22a15      | 255.5271314 | 1.73706495  | 0.174541281 | 9.952172568 | 2.47E-23       | 5.10E-22    |
| Gm44984       | 5.198178231 | 1.736648624 | 0.855513219 | 2.029949492 | 0.042361674    | 0.072977143 |
| Gm17048       | 0.150631615 | 1.735812588 | 3.649706385 | 0.475603351 | 0.634356987 NA |             |
| Gm8330        | 0.23698001  | 1.735293709 | 3.649706385 | 0.475461181 | 0.634458296 NA |             |
| Uqcrq         | 4710.324548 | 1.735220594 | 0.133769584 | 12.97171258 | 1.77E-38       | 1.15E-36    |
| Fetub         | 7618.003604 | 1.734590423 | 0.205824023 | 8.427541154 | 3.53E-17       | 4.43E-16    |
| Gm5805        | 0.720040733 | 1.734190935 | 2.759131118 | 0.628527917 | 0.529658164 NA |             |
| Slc37a4       | 1871.676276 | 1.733852077 | 0.329159669 | 5.267510689 | 1.38E-07       | 6.24E-07    |
| Mief2         | 333.2596211 | 1.733582829 | 0.17514254  | 9.898125428 | 4.24E-23       | 8.53E-22    |
| Amy2a1        | 0.23583353  | 1.733425747 | 3.649706385 | 0.47494937  | 0.634823061 NA |             |
| Gm12903       | 0.150065162 | 1.732913697 | 3.649706385 | 0.474809071 | 0.634923067 NA |             |
| Gm11736       | 0.719788615 | 1.732898535 | 2.759367871 | 0.628005622 | 0.530000257 NA |             |
| Rida          | 10808.95724 | 1.732567446 | 0.284176395 | 6.096802827 | 1.08E-09       | 6.29E-09    |
| Gm2412        | 0.150986783 | 1.732435496 | 3.649706385 | 0.474678046 | 0.635016468 NA |             |
| Gm13147       | 0.236029076 | 1.732200008 | 3.649706385 | 0.474613524 | 0.635062465 NA |             |
| Nqo2          | 1334.066861 | 1.731186596 | 0.294317832 | 5.882030946 | 4.05E-09       | 2.20E-08    |
| 4931406C07Rik | 3440.647207 | 1.731080381 | 0.213179835 | 8.120282005 | 4.65E-16       | 5.25E-15    |
| MF597757.1    | 0.23558842  | 1.730762183 | 3.649706385 | 0.474219567 | 0.635343341 NA |             |
| Gata4         | 217.2405417 | 1.730462761 | 0.218655908 | 7.914091026 | 2.49E-15       | 2.62E-14    |
| 1700129C05Rik | 0.235470472 | 1.730376871 | 3.649706385 | 0.474113994 | 0.63541862 NA  |             |
| 2610024D14Rik | 0.149571206 | 1.730376871 | 3.649706385 | 0.474113994 | 0.63541862 NA  |             |
| 4833427G06Rik | 0.150583352 | 1.730376871 | 3.649706385 | 0.474113994 | 0.63541862 NA  |             |
| 4930448K20Rik | 0.149571206 | 1.730376871 | 3.649706385 | 0.474113994 | 0.63541862 NA  |             |
| 4930467E23Rik | 0.149571206 | 1.730376871 | 3.649706385 | 0.474113994 | 0.63541862 NA  |             |
| 4930519F09Rik | 0.149571206 | 1.730376871 | 3.649706385 | 0.474113994 | 0.63541862 NA  |             |
| 4930544G11Rik | 0.235470472 | 1.730376871 | 3.649706385 | 0.474113994 | 0.63541862 NA  |             |
| 4933405L10Rik | 0.235470472 | 1.730376871 | 3.649706385 | 0.474113994 | 0.63541862 NA  |             |
| Adam25        | 0.150583352 | 1.730376871 | 3.649706385 | 0.474113994 | 0.63541862 NA  |             |
| Adgra1        | 0.150583352 | 1.730376871 | 3.649706385 | 0.474113994 | 0.63541862 NA  |             |
| Amd-ps1       | 0.150583352 | 1.730376871 | 3.649706385 | 0.474113994 | 0.63541862 NA  |             |
| Anapc15-ps    | 0.235470472 | 1.730376871 | 3.649706385 | 0.474113994 | 0.63541862 NA  |             |
| Ankrd36       | 0.235470472 | 1.730376871 | 3.649706385 | 0.474113994 | 0.63541862 NA  |             |
| Asb12         | 0.235470472 | 1.730376871 | 3.649706385 | 0.474113994 | 0.63541862 NA  |             |
| Atp5c1-ps     | 0.235470472 | 1.730376871 | 3.649706385 | 0.474113994 | 0.63541862 NA  |             |
| Atp5l2-ps     | 0.235470472 | 1.730376871 | 3.649706385 | 0.474113994 | 0.63541862 NA  |             |
| Btbd18        | 0.235470472 | 1.730376871 | 3.649706385 | 0.474113994 | 0.63541862 NA  |             |
| Cabp7         | 0.235470472 | 1.730376871 | 3.649706385 | 0.474113994 | 0.63541862 NA  |             |
| Cbx3-ps3      | 0.149571206 | 1.730376871 | 3.649706385 | 0.474113994 | 0.63541862 NA  |             |
| Cdv3-ps       | 0.149571206 | 1.730376871 | 3.649706385 | 0.474113994 | 0.63541862 NA  |             |
| Ces5a         | 0.150583352 | 1.730376871 | 3.649706385 | 0.474113994 | 0.63541862 NA  |             |
| Chat          | 0.150583352 | 1.730376871 | 3.649706385 | 0.474113994 | 0.63541862 NA  |             |
| Chchd2-ps     | 0.149571206 | 1.730376871 | 3.649706385 | 0.474113994 | 0.63541862 NA  |             |
| CK137956      | 0.150583352 | 1.730376871 | 3.649706385 | 0.474113994 | 0.63541862 NA  |             |
| Ckmt2         | 0.235470472 | 1.730376871 | 3.649706385 | 0.474113994 | 0.63541862 NA  |             |
| Clcnka        | 0.235470472 | 1.730376871 | 3.649706385 | 0.474113994 | 0.63541862 NA  |             |
| Cntn6         | 0.150583352 | 1.730376871 | 3.649706385 | 0.474113994 | 0.63541862 NA  |             |
| Cyp3a61-ps1   | 0.150583352 | 1.730376871 | 3.649706385 | 0.474113994 | 0.63541862 NA  |             |



|               |             |             |             |             |            |    |
|---------------|-------------|-------------|-------------|-------------|------------|----|
| Cyp4a28-ps    | 0.149571206 | 1.730376871 | 3.649706385 | 0.474113994 | 0.63541862 | NA |
| Cyp4a29       | 0.149571206 | 1.730376871 | 3.649706385 | 0.474113994 | 0.63541862 | NA |
| Cyt1l         | 0.235470472 | 1.730376871 | 3.649706385 | 0.474113994 | 0.63541862 | NA |
| Defa37        | 0.149571206 | 1.730376871 | 3.649706385 | 0.474113994 | 0.63541862 | NA |
| Defa38        | 0.149571206 | 1.730376871 | 3.649706385 | 0.474113994 | 0.63541862 | NA |
| Dipk1c        | 0.149571206 | 1.730376871 | 3.649706385 | 0.474113994 | 0.63541862 | NA |
| Dlx5          | 0.150583352 | 1.730376871 | 3.649706385 | 0.474113994 | 0.63541862 | NA |
| Dnah3         | 0.235470472 | 1.730376871 | 3.649706385 | 0.474113994 | 0.63541862 | NA |
| Dnajc19-ps    | 0.150583352 | 1.730376871 | 3.649706385 | 0.474113994 | 0.63541862 | NA |
| E530001F21Rik | 0.235470472 | 1.730376871 | 3.649706385 | 0.474113994 | 0.63541862 | NA |
| Eif3s6-ps1    | 0.150583352 | 1.730376871 | 3.649706385 | 0.474113994 | 0.63541862 | NA |
| Elavl2        | 0.235470472 | 1.730376871 | 3.649706385 | 0.474113994 | 0.63541862 | NA |
| Eras          | 0.235470472 | 1.730376871 | 3.649706385 | 0.474113994 | 0.63541862 | NA |
| Fam183b       | 0.149571206 | 1.730376871 | 3.649706385 | 0.474113994 | 0.63541862 | NA |
| Fam186a       | 0.149571206 | 1.730376871 | 3.649706385 | 0.474113994 | 0.63541862 | NA |
| Fam216b       | 0.149571206 | 1.730376871 | 3.649706385 | 0.474113994 | 0.63541862 | NA |
| Fam243        | 0.150583352 | 1.730376871 | 3.649706385 | 0.474113994 | 0.63541862 | NA |
| Fam71e2       | 0.149571206 | 1.730376871 | 3.649706385 | 0.474113994 | 0.63541862 | NA |
| Fancd2os      | 0.235470472 | 1.730376871 | 3.649706385 | 0.474113994 | 0.63541862 | NA |
| Fbxw28        | 0.149571206 | 1.730376871 | 3.649706385 | 0.474113994 | 0.63541862 | NA |
| Fer1l4        | 0.149571206 | 1.730376871 | 3.649706385 | 0.474113994 | 0.63541862 | NA |
| Fkbp1a-ps1    | 0.150583352 | 1.730376871 | 3.649706385 | 0.474113994 | 0.63541862 | NA |
| Flg2          | 0.150583352 | 1.730376871 | 3.649706385 | 0.474113994 | 0.63541862 | NA |
| FO082328.2    | 0.235470472 | 1.730376871 | 3.649706385 | 0.474113994 | 0.63541862 | NA |
| Foxe1         | 0.235470472 | 1.730376871 | 3.649706385 | 0.474113994 | 0.63541862 | NA |
| Frmf3         | 0.149571206 | 1.730376871 | 3.649706385 | 0.474113994 | 0.63541862 | NA |
| Gabrb2        | 0.235470472 | 1.730376871 | 3.649706385 | 0.474113994 | 0.63541862 | NA |
| Galr2         | 0.235470472 | 1.730376871 | 3.649706385 | 0.474113994 | 0.63541862 | NA |
| Gfra3         | 0.149571206 | 1.730376871 | 3.649706385 | 0.474113994 | 0.63541862 | NA |
| Gm10302       | 0.149571206 | 1.730376871 | 3.649706385 | 0.474113994 | 0.63541862 | NA |
| Gm10324       | 0.235470472 | 1.730376871 | 3.649706385 | 0.474113994 | 0.63541862 | NA |
| Gm10570       | 0.150583352 | 1.730376871 | 3.649706385 | 0.474113994 | 0.63541862 | NA |
| Gm10719       | 0.150583352 | 1.730376871 | 3.649706385 | 0.474113994 | 0.63541862 | NA |
| Gm10731       | 0.235470472 | 1.730376871 | 3.649706385 | 0.474113994 | 0.63541862 | NA |
| Gm10961       | 0.149571206 | 1.730376871 | 3.649706385 | 0.474113994 | 0.63541862 | NA |
| Gm11007       | 0.235470472 | 1.730376871 | 3.649706385 | 0.474113994 | 0.63541862 | NA |
| Gm1110        | 0.235470472 | 1.730376871 | 3.649706385 | 0.474113994 | 0.63541862 | NA |
| Gm11168       | 0.149571206 | 1.730376871 | 3.649706385 | 0.474113994 | 0.63541862 | NA |
| Gm11344       | 0.235470472 | 1.730376871 | 3.649706385 | 0.474113994 | 0.63541862 | NA |
| Gm11658       | 0.149571206 | 1.730376871 | 3.649706385 | 0.474113994 | 0.63541862 | NA |
| Gm11675       | 0.149571206 | 1.730376871 | 3.649706385 | 0.474113994 | 0.63541862 | NA |
| Gm11701       | 0.149571206 | 1.730376871 | 3.649706385 | 0.474113994 | 0.63541862 | NA |
| Gm11785       | 0.150583352 | 1.730376871 | 3.649706385 | 0.474113994 | 0.63541862 | NA |
| Gm11836       | 0.149571206 | 1.730376871 | 3.649706385 | 0.474113994 | 0.63541862 | NA |
| Gm11889       | 0.149571206 | 1.730376871 | 3.649706385 | 0.474113994 | 0.63541862 | NA |
| Gm11996       | 0.149571206 | 1.730376871 | 3.649706385 | 0.474113994 | 0.63541862 | NA |
| Gm12125       | 0.150583352 | 1.730376871 | 3.649706385 | 0.474113994 | 0.63541862 | NA |
| Gm12129       | 0.149571206 | 1.730376871 | 3.649706385 | 0.474113994 | 0.63541862 | NA |
| Gm12251       | 0.149571206 | 1.730376871 | 3.649706385 | 0.474113994 | 0.63541862 | NA |
| Gm12341       | 0.235470472 | 1.730376871 | 3.649706385 | 0.474113994 | 0.63541862 | NA |
| Gm12353       | 0.150583352 | 1.730376871 | 3.649706385 | 0.474113994 | 0.63541862 | NA |
| Gm12380       | 0.149571206 | 1.730376871 | 3.649706385 | 0.474113994 | 0.63541862 | NA |
| Gm12399       | 0.235470472 | 1.730376871 | 3.649706385 | 0.474113994 | 0.63541862 | NA |
| Gm12419       | 0.150583352 | 1.730376871 | 3.649706385 | 0.474113994 | 0.63541862 | NA |
| Gm12502       | 0.150583352 | 1.730376871 | 3.649706385 | 0.474113994 | 0.63541862 | NA |
| Gm12507       | 0.235470472 | 1.730376871 | 3.649706385 | 0.474113994 | 0.63541862 | NA |
| Gm12664       | 0.149571206 | 1.730376871 | 3.649706385 | 0.474113994 | 0.63541862 | NA |
| Gm12733       | 0.149571206 | 1.730376871 | 3.649706385 | 0.474113994 | 0.63541862 | NA |
| Gm12741       | 0.149571206 | 1.730376871 | 3.649706385 | 0.474113994 | 0.63541862 | NA |
| Gm12934       | 0.149571206 | 1.730376871 | 3.649706385 | 0.474113994 | 0.63541862 | NA |
| Gm12988       | 0.150583352 | 1.730376871 | 3.649706385 | 0.474113994 | 0.63541862 | NA |
| Gm13231       | 0.150583352 | 1.730376871 | 3.649706385 | 0.474113994 | 0.63541862 | NA |
| Gm13359       | 0.149571206 | 1.730376871 | 3.649706385 | 0.474113994 | 0.63541862 | NA |
| Gm13506       | 0.149571206 | 1.730376871 | 3.649706385 | 0.474113994 | 0.63541862 | NA |
| Gm13542       | 0.150583352 | 1.730376871 | 3.649706385 | 0.474113994 | 0.63541862 | NA |
| Gm13626       | 0.235470472 | 1.730376871 | 3.649706385 | 0.474113994 | 0.63541862 | NA |









|            |             |             |             |             |            |    |
|------------|-------------|-------------|-------------|-------------|------------|----|
| Gtbbp4-ps6 | 0.150583352 | 1.730376871 | 3.649706385 | 0.474113994 | 0.63541862 | NA |
| Gtsf1l     | 0.235470472 | 1.730376871 | 3.649706385 | 0.474113994 | 0.63541862 | NA |
| Hapln2     | 0.149571206 | 1.730376871 | 3.649706385 | 0.474113994 | 0.63541862 | NA |
| Hhat1      | 0.149571206 | 1.730376871 | 3.649706385 | 0.474113994 | 0.63541862 | NA |
| Hmx1       | 0.150583352 | 1.730376871 | 3.649706385 | 0.474113994 | 0.63541862 | NA |
| Hoxb13     | 0.149571206 | 1.730376871 | 3.649706385 | 0.474113994 | 0.63541862 | NA |
| Hoxd10     | 0.150583352 | 1.730376871 | 3.649706385 | 0.474113994 | 0.63541862 | NA |
| Hs3st2     | 0.150583352 | 1.730376871 | 3.649706385 | 0.474113994 | 0.63541862 | NA |
| Hspe1-ps4  | 0.150583352 | 1.730376871 | 3.649706385 | 0.474113994 | 0.63541862 | NA |
| Hyal4      | 0.150583352 | 1.730376871 | 3.649706385 | 0.474113994 | 0.63541862 | NA |
| Igkv6-29   | 0.150583352 | 1.730376871 | 3.649706385 | 0.474113994 | 0.63541862 | NA |
| Jakmip3    | 0.150583352 | 1.730376871 | 3.649706385 | 0.474113994 | 0.63541862 | NA |
| Kcnmb2     | 0.149571206 | 1.730376871 | 3.649706385 | 0.474113994 | 0.63541862 | NA |
| Kdm4dl     | 0.150583352 | 1.730376871 | 3.649706385 | 0.474113994 | 0.63541862 | NA |
| Krt15      | 0.235470472 | 1.730376871 | 3.649706385 | 0.474113994 | 0.63541862 | NA |
| Krt84      | 0.149571206 | 1.730376871 | 3.649706385 | 0.474113994 | 0.63541862 | NA |
| Lep        | 0.150583352 | 1.730376871 | 3.649706385 | 0.474113994 | 0.63541862 | NA |
| LO018689.4 | 0.235470472 | 1.730376871 | 3.649706385 | 0.474113994 | 0.63541862 | NA |
| Lrp1b      | 0.149571206 | 1.730376871 | 3.649706385 | 0.474113994 | 0.63541862 | NA |
| Lrrc26     | 0.149571206 | 1.730376871 | 3.649706385 | 0.474113994 | 0.63541862 | NA |
| Lrriq1     | 0.149571206 | 1.730376871 | 3.649706385 | 0.474113994 | 0.63541862 | NA |
| LT629149.1 | 0.235470472 | 1.730376871 | 3.649706385 | 0.474113994 | 0.63541862 | NA |
| LT629152.3 | 0.235470472 | 1.730376871 | 3.649706385 | 0.474113994 | 0.63541862 | NA |
| LT629152.5 | 0.235470472 | 1.730376871 | 3.649706385 | 0.474113994 | 0.63541862 | NA |
| Ly6f       | 0.149571206 | 1.730376871 | 3.649706385 | 0.474113994 | 0.63541862 | NA |
| Ly6g6f     | 0.149571206 | 1.730376871 | 3.649706385 | 0.474113994 | 0.63541862 | NA |
| Ly6g6g     | 0.149571206 | 1.730376871 | 3.649706385 | 0.474113994 | 0.63541862 | NA |
| Ly6l       | 0.150583352 | 1.730376871 | 3.649706385 | 0.474113994 | 0.63541862 | NA |
| Mb         | 0.149571206 | 1.730376871 | 3.649706385 | 0.474113994 | 0.63541862 | NA |
| Mep1a      | 0.150583352 | 1.730376871 | 3.649706385 | 0.474113994 | 0.63541862 | NA |
| Ms4a18     | 0.149571206 | 1.730376871 | 3.649706385 | 0.474113994 | 0.63541862 | NA |
| Muc13      | 0.150583352 | 1.730376871 | 3.649706385 | 0.474113994 | 0.63541862 | NA |
| Mup-ps22   | 0.149571206 | 1.730376871 | 3.649706385 | 0.474113994 | 0.63541862 | NA |
| Myh3       | 0.149571206 | 1.730376871 | 3.649706385 | 0.474113994 | 0.63541862 | NA |
| My11       | 0.149571206 | 1.730376871 | 3.649706385 | 0.474113994 | 0.63541862 | NA |
| Nanog-ps1  | 0.235470472 | 1.730376871 | 3.649706385 | 0.474113994 | 0.63541862 | NA |
| Ndufa11b   | 0.150583352 | 1.730376871 | 3.649706385 | 0.474113994 | 0.63541862 | NA |
| Nell2      | 0.149571206 | 1.730376871 | 3.649706385 | 0.474113994 | 0.63541862 | NA |
| Nmur2      | 0.149571206 | 1.730376871 | 3.649706385 | 0.474113994 | 0.63541862 | NA |
| Nptx2      | 0.235470472 | 1.730376871 | 3.649706385 | 0.474113994 | 0.63541862 | NA |
| Olf1036    | 0.235470472 | 1.730376871 | 3.649706385 | 0.474113994 | 0.63541862 | NA |
| Olf1097    | 0.149571206 | 1.730376871 | 3.649706385 | 0.474113994 | 0.63541862 | NA |
| Olf1285    | 0.235470472 | 1.730376871 | 3.649706385 | 0.474113994 | 0.63541862 | NA |
| Olf1301    | 0.150583352 | 1.730376871 | 3.649706385 | 0.474113994 | 0.63541862 | NA |
| Olf1351    | 0.235470472 | 1.730376871 | 3.649706385 | 0.474113994 | 0.63541862 | NA |
| Olf1384    | 0.235470472 | 1.730376871 | 3.649706385 | 0.474113994 | 0.63541862 | NA |
| Olf401     | 0.150583352 | 1.730376871 | 3.649706385 | 0.474113994 | 0.63541862 | NA |
| Olf556     | 0.150583352 | 1.730376871 | 3.649706385 | 0.474113994 | 0.63541862 | NA |
| Olf605     | 0.235470472 | 1.730376871 | 3.649706385 | 0.474113994 | 0.63541862 | NA |
| Olf62      | 0.150583352 | 1.730376871 | 3.649706385 | 0.474113994 | 0.63541862 | NA |
| Olf623     | 0.149571206 | 1.730376871 | 3.649706385 | 0.474113994 | 0.63541862 | NA |
| Olf717-ps1 | 0.149571206 | 1.730376871 | 3.649706385 | 0.474113994 | 0.63541862 | NA |
| Olf721-ps1 | 0.149571206 | 1.730376871 | 3.649706385 | 0.474113994 | 0.63541862 | NA |
| Olf745     | 0.235470472 | 1.730376871 | 3.649706385 | 0.474113994 | 0.63541862 | NA |
| Olf816     | 0.149571206 | 1.730376871 | 3.649706385 | 0.474113994 | 0.63541862 | NA |
| Olf980     | 0.235470472 | 1.730376871 | 3.649706385 | 0.474113994 | 0.63541862 | NA |
| Otop1      | 0.235470472 | 1.730376871 | 3.649706385 | 0.474113994 | 0.63541862 | NA |
| Pabpc6     | 0.150583352 | 1.730376871 | 3.649706385 | 0.474113994 | 0.63541862 | NA |
| Pate1      | 0.149571206 | 1.730376871 | 3.649706385 | 0.474113994 | 0.63541862 | NA |
| Pcdha5     | 0.149571206 | 1.730376871 | 3.649706385 | 0.474113994 | 0.63541862 | NA |
| Pdzrn4     | 0.150583352 | 1.730376871 | 3.649706385 | 0.474113994 | 0.63541862 | NA |
| Pnliplr1   | 0.150583352 | 1.730376871 | 3.649706385 | 0.474113994 | 0.63541862 | NA |
| Prm3       | 0.235470472 | 1.730376871 | 3.649706385 | 0.474113994 | 0.63541862 | NA |
| Prss52     | 0.235470472 | 1.730376871 | 3.649706385 | 0.474113994 | 0.63541862 | NA |
| Rad21l     | 0.235470472 | 1.730376871 | 3.649706385 | 0.474113994 | 0.63541862 | NA |
| Rhox4g     | 0.149571206 | 1.730376871 | 3.649706385 | 0.474113994 | 0.63541862 | NA |

|             |             |             |             |             |             |             |
|-------------|-------------|-------------|-------------|-------------|-------------|-------------|
| Rnase2a     | 0.150583352 | 1.730376871 | 3.649706385 | 0.474113994 | 0.63541862  | NA          |
| Rnf133      | 0.150583352 | 1.730376871 | 3.649706385 | 0.474113994 | 0.63541862  | NA          |
| Rnf170-ps   | 0.149571206 | 1.730376871 | 3.649706385 | 0.474113994 | 0.63541862  | NA          |
| Rpl15-ps5   | 0.150583352 | 1.730376871 | 3.649706385 | 0.474113994 | 0.63541862  | NA          |
| Rpl27-ps2   | 0.150583352 | 1.730376871 | 3.649706385 | 0.474113994 | 0.63541862  | NA          |
| Rps2-ps11   | 0.150583352 | 1.730376871 | 3.649706385 | 0.474113994 | 0.63541862  | NA          |
| Rsph14      | 0.149571206 | 1.730376871 | 3.649706385 | 0.474113994 | 0.63541862  | NA          |
| Saa-ps      | 0.235470472 | 1.730376871 | 3.649706385 | 0.474113994 | 0.63541862  | NA          |
| Sall3       | 0.235470472 | 1.730376871 | 3.649706385 | 0.474113994 | 0.63541862  | NA          |
| Samd7       | 0.149571206 | 1.730376871 | 3.649706385 | 0.474113994 | 0.63541862  | NA          |
| Scn10a      | 0.235470472 | 1.730376871 | 3.649706385 | 0.474113994 | 0.63541862  | NA          |
| Selenov     | 0.150583352 | 1.730376871 | 3.649706385 | 0.474113994 | 0.63541862  | NA          |
| Serpinb3b   | 0.150583352 | 1.730376871 | 3.649706385 | 0.474113994 | 0.63541862  | NA          |
| Siah3       | 0.235470472 | 1.730376871 | 3.649706385 | 0.474113994 | 0.63541862  | NA          |
| Skint1      | 0.235470472 | 1.730376871 | 3.649706385 | 0.474113994 | 0.63541862  | NA          |
| Slc22a22    | 0.235470472 | 1.730376871 | 3.649706385 | 0.474113994 | 0.63541862  | NA          |
| Slc26a5     | 0.149571206 | 1.730376871 | 3.649706385 | 0.474113994 | 0.63541862  | NA          |
| Slitrk5     | 0.149571206 | 1.730376871 | 3.649706385 | 0.474113994 | 0.63541862  | NA          |
| Slitrk6     | 0.150583352 | 1.730376871 | 3.649706385 | 0.474113994 | 0.63541862  | NA          |
| Sox10       | 0.235470472 | 1.730376871 | 3.649706385 | 0.474113994 | 0.63541862  | NA          |
| Spata45     | 0.235470472 | 1.730376871 | 3.649706385 | 0.474113994 | 0.63541862  | NA          |
| Spatc1      | 0.235470472 | 1.730376871 | 3.649706385 | 0.474113994 | 0.63541862  | NA          |
| Spr1b       | 0.150583352 | 1.730376871 | 3.649706385 | 0.474113994 | 0.63541862  | NA          |
| Tacr2       | 0.235470472 | 1.730376871 | 3.649706385 | 0.474113994 | 0.63541862  | NA          |
| Tbx19       | 0.150583352 | 1.730376871 | 3.649706385 | 0.474113994 | 0.63541862  | NA          |
| Tcl1        | 0.235470472 | 1.730376871 | 3.649706385 | 0.474113994 | 0.63541862  | NA          |
| Teddm3      | 0.149571206 | 1.730376871 | 3.649706385 | 0.474113994 | 0.63541862  | NA          |
| Tex33       | 0.150583352 | 1.730376871 | 3.649706385 | 0.474113994 | 0.63541862  | NA          |
| Tlx1        | 0.149571206 | 1.730376871 | 3.649706385 | 0.474113994 | 0.63541862  | NA          |
| Tlx3        | 0.235470472 | 1.730376871 | 3.649706385 | 0.474113994 | 0.63541862  | NA          |
| Tmdd1       | 0.235470472 | 1.730376871 | 3.649706385 | 0.474113994 | 0.63541862  | NA          |
| Tmem174     | 0.150583352 | 1.730376871 | 3.649706385 | 0.474113994 | 0.63541862  | NA          |
| Tmem63c     | 0.150583352 | 1.730376871 | 3.649706385 | 0.474113994 | 0.63541862  | NA          |
| Tpbpa       | 0.235470472 | 1.730376871 | 3.649706385 | 0.474113994 | 0.63541862  | NA          |
| Tpte        | 0.149571206 | 1.730376871 | 3.649706385 | 0.474113994 | 0.63541862  | NA          |
| Trpc4       | 0.235470472 | 1.730376871 | 3.649706385 | 0.474113994 | 0.63541862  | NA          |
| Trpv5       | 0.150583352 | 1.730376871 | 3.649706385 | 0.474113994 | 0.63541862  | NA          |
| Try4        | 0.150447094 | 1.730376871 | 3.649706385 | 0.474113994 | 0.63541862  | NA          |
| Vmn1r-ps151 | 0.149571206 | 1.730376871 | 3.649706385 | 0.474113994 | 0.63541862  | NA          |
| Vmn2r-ps41  | 0.235470472 | 1.730376871 | 3.649706385 | 0.474113994 | 0.63541862  | NA          |
| Vmn2r120    | 0.235470472 | 1.730376871 | 3.649706385 | 0.474113994 | 0.63541862  | NA          |
| Vmn2r20     | 0.150583352 | 1.730376871 | 3.649706385 | 0.474113994 | 0.63541862  | NA          |
| Vmn2r88     | 0.149571206 | 1.730376871 | 3.649706385 | 0.474113994 | 0.63541862  | NA          |
| Wnt3        | 0.150583352 | 1.730376871 | 3.649706385 | 0.474113994 | 0.63541862  | NA          |
| Zc2hc1b     | 0.150583352 | 1.730376871 | 3.649706385 | 0.474113994 | 0.63541862  | NA          |
| Zfp640      | 0.235470472 | 1.730376871 | 3.649706385 | 0.474113994 | 0.63541862  | NA          |
| Zfp989      | 0.235470472 | 1.730376871 | 3.649706385 | 0.474113994 | 0.63541862  | NA          |
| Ss1812      | 383.3094993 | 1.730259578 | 0.232841449 | 7.431063442 | 1.08E-13    | 9.71E-13    |
| Tph1        | 2.253831834 | 1.729745085 | 1.739754356 | 0.994246733 | 0.320102761 | 0.411494483 |
| Erich3      | 0.765923816 | 1.729038653 | 2.639777816 | 0.654994008 | 0.512471612 | NA          |
| Pcca        | 997.9525637 | 1.728354193 | 0.29272482  | 5.90436503  | 3.54E-09    | 1.93E-08    |
| 1-Mar       | 4649.836944 | 1.727958838 | 0.335801983 | 5.145767231 | 2.66E-07    | 1.16E-06    |
| Plppr5      | 2.297415492 | 1.727921505 | 1.668016547 | 1.035913887 | 0.300242318 | 0.389876315 |
| Gm6274      | 1.057100087 | 1.726804585 | 1.92498767  | 0.897047089 | 0.369693791 | NA          |
| Gatb        | 392.723771  | 1.726797544 | 0.294198107 | 5.86950596  | 4.37E-09    | 2.36E-08    |
| Npbwr1      | 1.980845436 | 1.72663477  | 1.516279279 | 1.138731363 | 0.254815217 | 0.339673925 |
| Gm12183     | 2.060557853 | 1.725182869 | 1.850937903 | 0.932058751 | 0.351306164 | 0.443634629 |
| Tssk6       | 0.718230736 | 1.724935083 | 2.760831778 | 0.624788188 | 0.532110084 | NA          |
| Olfr1260    | 10.2251734  | 1.724734643 | 0.571537128 | 3.01771234  | 0.002546905 | 0.005890604 |
| Cyp3a59     | 825.6186846 | 1.724380273 | 0.475283717 | 3.628107193 | 0.000285507 | 0.000796615 |
| Prickle4    | 20.36019453 | 1.724174747 | 0.690219344 | 2.498009888 | 0.012489271 | 0.024749168 |
| Cd19        | 21.22351667 | 1.72404513  | 0.811037483 | 2.125728054 | 0.03352591  | 0.05935712  |
| Rtl4        | 7.52847413  | 1.723954696 | 0.752685408 | 2.290405363 | 0.021997829 | 0.040936469 |
| Uroc1       | 5311.796333 | 1.723880247 | 0.432752937 | 3.983520618 | 6.79E-05    | 0.000210893 |
| Rnf186      | 65.08597122 | 1.723520593 | 0.384268426 | 4.485199605 | 7.28E-06    | 2.62E-05    |
| Ttc7b       | 147.2586296 | 1.723194835 | 0.216020724 | 7.976988511 | 1.50E-15    | 1.62E-14    |

|               |             |             |             |             |                |             |
|---------------|-------------|-------------|-------------|-------------|----------------|-------------|
| Thsd7b        | 3.63668043  | 1.721008513 | 1.047551494 | 1.642886792 | 0.100406358    | 0.154907475 |
| Gm31532       | 1.020835358 | 1.719883222 | 1.689142085 | 1.01819926  | 0.308583271 NA |             |
| Slc12a7       | 2299.607467 | 1.719847761 | 0.108719762 | 15.81909063 | 2.30E-56       | 4.50E-54    |
| Gucy2f        | 0.676981192 | 1.719481306 | 2.754741215 | 0.624189777 | 0.53250296 NA  |             |
| Rpl23a-ps3    | 1.083335378 | 1.719287586 | 3.064990015 | 0.560943944 | 0.574835752 NA |             |
| Gjb2          | 3819.330428 | 1.718361601 | 0.260345478 | 6.600312831 | 4.10E-11       | 2.80E-10    |
| Tgm4          | 3.547025404 | 1.717501843 | 1.007735248 | 1.704318517 | 0.088321597    | 0.138941275 |
| Gm47933       | 23.50010661 | 1.717428152 | 0.435686654 | 3.941888363 | 8.08E-05       | 0.000248459 |
| Celf6         | 4.192186293 | 1.717151217 | 0.944942005 | 1.817202757 | 0.069186073    | 0.112033071 |
| Abcg2         | 1364.510417 | 1.717086407 | 0.315139134 | 5.448661315 | 5.08E-08       | 2.41E-07    |
| Lmf1          | 654.5917323 | 1.716454742 | 0.137600055 | 12.47423007 | 1.03E-35       | 5.48E-34    |
| Gm49275       | 2.232728058 | 1.7150289   | 1.187835788 | 1.443826594 | 0.148787759    | 0.216298603 |
| Nudt12        | 782.2655549 | 1.713003226 | 0.249770176 | 6.858317714 | 6.97E-12       | 5.19E-11    |
| Tob1          | 2141.939891 | 1.712952408 | 0.131738613 | 13.00266011 | 1.18E-38       | 7.72E-37    |
| Mvd           | 438.4103047 | 1.712153367 | 0.244242176 | 7.010064338 | 2.38E-12       | 1.87E-11    |
| Mccc1         | 823.4554602 | 1.712086602 | 0.217359533 | 7.876749526 | 3.36E-15       | 3.50E-14    |
| Gm2423        | 0.700414348 | 1.711796769 | 3.318438359 | 0.515844076 | 0.605963316 NA |             |
| Gm9403        | 3.509404456 | 1.711623961 | 1.324464164 | 1.292314286 | 0.196248326    | 0.272890821 |
| Sar1b         | 1941.035735 | 1.711198392 | 0.129939916 | 13.16915115 | 1.32E-39       | 9.46E-38    |
| Mtif3         | 359.6147851 | 1.709358609 | 0.226054593 | 7.561707034 | 3.98E-14       | 3.74E-13    |
| Gm10157       | 0.726451262 | 1.708922257 | 3.289444844 | 0.519516921 | 0.603400316 NA |             |
| Ndufb4c       | 972.5686747 | 1.708210778 | 0.171972925 | 9.933021602 | 2.99E-23       | 6.13E-22    |
| Gm15501       | 10.44694309 | 1.707607661 | 1.01321826  | 1.685330524 | 0.09192482     | 0.143773791 |
| Plin4         | 175.9355899 | 1.707444522 | 0.399891454 | 4.269769972 | 1.96E-05       | 6.60E-05    |
| Ghrpr         | 2464.032889 | 1.705245306 | 0.270131039 | 6.312659646 | 2.74E-10       | 1.70E-09    |
| Kctd21        | 135.4572775 | 1.705164846 | 0.279895417 | 6.092149934 | 1.11E-09       | 6.46E-09    |
| Nr4a2         | 11.41770351 | 1.705083172 | 0.868466687 | 1.963325938 | 0.049608313    | 0.083801281 |
| Cebpb         | 2165.962074 | 1.704292011 | 0.263912677 | 6.457787602 | 1.06E-10       | 6.91E-10    |
| Gja6          | 1.525328223 | 1.703758656 | 1.413813722 | 1.205080012 | 0.228172415 NA |             |
| Tlr5          | 104.6883608 | 1.703583097 | 0.378791655 | 4.497414536 | 6.88E-06       | 2.49E-05    |
| Serpina3c     | 56.14105945 | 1.703546202 | 0.706072982 | 2.41270555  | 0.015834606    | 0.030575191 |
| F7            | 1086.96991  | 1.703057431 | 0.188348174 | 9.042070299 | 1.54E-19       | 2.35E-18    |
| Adipor2       | 6232.686827 | 1.703014332 | 0.20158655  | 8.448055355 | 2.96E-17       | 3.75E-16    |
| Olfr1191-ps1  | 18.08490227 | 1.702984439 | 0.506392013 | 3.362976498 | 0.000771069    | 0.001986578 |
| Gm7446        | 0.699268931 | 1.702684067 | 3.320072227 | 0.51284549  | 0.608059406 NA |             |
| Caln1         | 54.34791531 | 1.702297548 | 0.707429378 | 2.406314469 | 0.016114387    | 0.031041589 |
| Nhlrc1        | 16.65835048 | 1.701916038 | 0.461178699 | 3.690361328 | 0.000223936    | 0.000637338 |
| Cyp4f15       | 2154.719617 | 1.701373789 | 0.299533151 | 5.6800851   | 1.35E-08       | 6.86E-08    |
| Agmo          | 689.5594073 | 1.700958663 | 0.305183728 | 5.573556212 | 2.50E-08       | 1.23E-07    |
| Slc25a42      | 1542.307346 | 1.700700359 | 0.255697588 | 6.651217839 | 2.91E-11       | 2.02E-10    |
| Mpv17l        | 366.9811038 | 1.698594521 | 0.255578248 | 6.646084066 | 3.01E-11       | 2.09E-10    |
| Olfr1380      | 5.388825154 | 1.698394878 | 0.81435226  | 2.085577656 | 0.037016897    | 0.064804278 |
| Gm48869       | 0.710983728 | 1.698246259 | 3.306867529 | 0.513551342 | 0.607565706 NA |             |
| Sec14l4       | 1306.795658 | 1.698121115 | 0.370112306 | 4.588123891 | 4.47E-06       | 1.66E-05    |
| Osblp1a       | 1405.898673 | 1.697695439 | 0.207354888 | 8.187390491 | 2.67E-16       | 3.09E-15    |
| Gm20796       | 4.169803379 | 1.697600198 | 1.04423174  | 1.625692969 | 0.104014986    | 0.159608732 |
| Nanog         | 4.695578818 | 1.695895196 | 0.785434164 | 2.159181857 | 0.030836061    | 0.05515614  |
| Atg10         | 53.05940584 | 1.69375077  | 0.299575405 | 5.653837878 | 1.57E-08       | 7.93E-08    |
| Etfrf1        | 549.2878378 | 1.692751508 | 0.178606201 | 9.477562901 | 2.60E-21       | 4.64E-20    |
| Gm49177       | 0.71274128  | 1.691625414 | 2.799974851 | 0.60415736  | 0.545739027 NA |             |
| Tpm2          | 107.0445525 | 1.690909707 | 0.392257033 | 4.310718646 | 1.63E-05       | 5.56E-05    |
| Srr           | 961.2186958 | 1.690417923 | 0.296799632 | 5.695485233 | 1.23E-08       | 6.30E-08    |
| Dnajc19       | 728.8561893 | 1.690170355 | 0.211384228 | 7.995725949 | 1.29E-15       | 1.40E-14    |
| Fdx1          | 1694.91659  | 1.690063175 | 0.210067942 | 8.045316934 | 8.60E-16       | 9.50E-15    |
| Dpm1          | 599.4955295 | 1.689965668 | 0.251441856 | 6.721099246 | 1.80E-11       | 1.28E-10    |
| Pblid1        | 2885.675192 | 1.689616392 | 0.263583607 | 6.410172501 | 1.45E-10       | 9.33E-10    |
| Gltpd2        | 771.2920173 | 1.688942688 | 0.184260491 | 9.166059851 | 4.91E-20       | 7.85E-19    |
| Comt          | 11148.08771 | 1.688863286 | 0.241304599 | 6.998885624 | 2.58E-12       | 2.01E-11    |
| Slc23a1       | 865.8319384 | 1.688071717 | 0.348983699 | 4.837107639 | 1.32E-06       | 5.23E-06    |
| Aldh4a1       | 4021.549206 | 1.687839513 | 0.223199212 | 7.562031669 | 3.97E-14       | 3.74E-13    |
| Dnajc28       | 135.5403823 | 1.687024098 | 0.352783965 | 4.782031683 | 1.74E-06       | 6.77E-06    |
| Olfr1221      | 38.36543916 | 1.68697769  | 0.341663721 | 4.937538247 | 7.91E-07       | 3.24E-06    |
| Gm47951       | 26.92791962 | 1.68577694  | 0.445443799 | 3.784488508 | 0.000154025    | 0.000451017 |
| Olfr1555-ps1  | 6.604678777 | 1.685667331 | 0.84425202  | 1.996639973 | 0.045864307    | 0.078346163 |
| 4932411N23Rik | 0.998461818 | 1.685635506 | 1.866431324 | 0.903132885 | 0.366455373 NA |             |
| Zswim7        | 110.8786724 | 1.685581022 | 0.223862098 | 7.529550728 | 5.09E-14       | 4.75E-13    |

|           |             |             |             |             |                |             |
|-----------|-------------|-------------|-------------|-------------|----------------|-------------|
| Maob      | 2370.333354 | 1.685566105 | 0.266229323 | 6.331256406 | 2.43E-10       | 1.52E-09    |
| Uqcrh     | 2320.570676 | 1.684775945 | 0.157247346 | 10.7141773  | 8.73E-27       | 2.35E-25    |
| Hsd12     | 1021.281003 | 1.684468099 | 0.236408548 | 7.125241921 | 1.04E-12       | 8.48E-12    |
| H2bc3     | 3.90990967  | 1.68397096  | 1.346304246 | 1.250810109 | 0.211003766    | 0.290102593 |
| Atp5h     | 3213.840677 | 1.68388339  | 0.125678935 | 13.3982945  | 6.19E-41       | 5.00E-39    |
| Vmn1r34   | 2.10595319  | 1.683118064 | 1.435739004 | 1.172300857 | 0.241076288    | 0.32458289  |
| Gm3219    | 236.285198  | 1.68067418  | 0.368248532 | 4.563967092 | 5.02E-06       | 1.85E-05    |
| Ndufb9    | 2582.183762 | 1.68047505  | 0.144114035 | 11.66073139 | 2.02E-31       | 7.96E-30    |
| Ranbp10   | 1269.537442 | 1.679373256 | 0.200806034 | 8.363161338 | 6.11E-17       | 7.48E-16    |
| Gm5819    | 4.683369581 | 1.678446271 | 1.068700257 | 1.570549141 | 0.116287411    | 0.175735111 |
| Etfbl     | 6.998958669 | 1.67800315  | 1.264950717 | 1.326536384 | 0.184662092    | 0.259553083 |
| Cox6b1    | 3279.23317  | 1.677755808 | 0.169414015 | 9.903288163 | 4.03E-23       | 8.13E-22    |
| Olfr1457  | 3.53010686  | 1.67770753  | 1.028672969 | 1.630943535 | 0.102902234    | 0.158142729 |
| Mcrip2    | 449.7326318 | 1.677100836 | 0.265620173 | 6.313906108 | 2.72E-10       | 1.69E-09    |
| Klf15     | 2420.27219  | 1.676944497 | 0.245533374 | 6.82980267  | 8.50E-12       | 6.28E-11    |
| Apof      | 8868.039938 | 1.675864225 | 0.256472313 | 6.534289043 | 6.39E-11       | 4.28E-10    |
| Gm12689   | 10.64950323 | 1.67547707  | 0.59732552  | 2.804964822 | 0.005032207    | 0.010936903 |
| Ggnbp1    | 245.2201947 | 1.674548971 | 0.250340128 | 6.689095291 | 2.25E-11       | 1.58E-10    |
| Pla2g2d   | 4.546700059 | 1.673439521 | 1.120807807 | 1.493065547 | 0.13542003     | 0.199519547 |
| Rpl19-ps6 | 0.557431248 | 1.673083263 | 2.495312266 | 0.670490538 | 0.502545136 NA |             |
| Gm6501    | 0.697545997 | 1.672959784 | 3.356093938 | 0.498484195 | 0.618142807 NA |             |
| Gm18163   | 0.729842751 | 1.672413868 | 3.320230159 | 0.503704197 | 0.614469258 NA |             |
| Hamp2     | 128.3741499 | 1.672321434 | 0.643860932 | 2.597333291 | 0.009395071    | 0.019196124 |
| C9        | 10512.4182  | 1.672091918 | 0.339892549 | 4.91947212  | 8.68E-07       | 3.53E-06    |
| Endog     | 467.5773456 | 1.671938039 | 0.241081656 | 6.935152472 | 4.06E-12       | 3.10E-11    |
| Gm15737   | 0.697250937 | 1.671092982 | 3.356495697 | 0.497819741 | 0.6186111 NA   |             |
| BC035947  | 180.3959188 | 1.670901337 | 0.333119722 | 5.015918383 | 5.28E-07       | 2.21E-06    |
| Dgcr6     | 579.4136423 | 1.669731362 | 0.151993332 | 10.98555664 | 4.48E-28       | 1.34E-26    |
| Uqcrrs1   | 2885.694863 | 1.669610761 | 0.151236773 | 11.03971425 | 2.46E-28       | 7.48E-27    |
| Lemd1     | 0.971098266 | 1.669565315 | 1.939753559 | 0.860710015 | 0.389397776 NA |             |
| Gm15616   | 0.548144216 | 1.669039651 | 2.505544882 | 0.666138397 | 0.505322644 NA |             |
| Gm12912   | 8.205442519 | 1.668967832 | 0.601934588 | 2.772673086 | 0.005559794    | 0.011979698 |
| Gm3052    | 283.7750334 | 1.668274212 | 0.215219771 | 7.751491432 | 9.08E-15       | 9.09E-14    |
| Gm8795    | 0.570325951 | 1.66804867  | 2.48003712  | 0.672590203 | 0.501208036 NA |             |
| Gsto1     | 1590.924949 | 1.667053314 | 0.151552429 | 10.99984557 | 3.83E-28       | 1.15E-26    |
| Gm45834   | 0.570205268 | 1.666985397 | 2.480163989 | 0.672127087 | 0.501502794 NA |             |
| Bphl      | 1736.303625 | 1.666667137 | 0.25897639  | 6.435594901 | 1.23E-10       | 7.95E-10    |
| Gm45147   | 2.28647261  | 1.666213027 | 1.537956673 | 1.083393997 | 0.278633579    | 0.366015199 |
| Hspb8     | 2048.434774 | 1.665080738 | 0.155991652 | 10.67416569 | 1.34E-26       | 3.57E-25    |
| Olfr1106  | 0.720911744 | 1.663351477 | 2.795041968 | 0.595107872 | 0.551771367 NA |             |
| Rpl30-ps9 | 2.498447752 | 1.663341345 | 1.746496032 | 0.952387703 | 0.340900393    | 0.43322176  |
| Tmem30a   | 2380.422747 | 1.662034047 | 0.163054175 | 10.19314008 | 2.13E-24       | 4.77E-23    |
| Gpt       | 3953.393144 | 1.661721894 | 0.244385368 | 6.799596495 | 1.05E-11       | 7.67E-11    |
| Gm19085   | 2.080241878 | 1.660662368 | 1.41229484  | 1.175860961 | 0.239650441    | 0.323045839 |
| Nim1k     | 36.97003096 | 1.660402318 | 0.47993287  | 3.459655341 | 0.000540867    | 0.001436694 |
| Gm9687    | 0.569360311 | 1.66016873  | 2.48108183  | 0.669130986 | 0.503411926 NA |             |
| Cox6c     | 3539.920997 | 1.659994811 | 0.139333946 | 11.91378598 | 1.00E-32       | 4.31E-31    |
| Gm4922    | 4.198782335 | 1.659959461 | 0.885208261 | 1.875219124 | 0.060762584    | 0.099911317 |
| Fcrl6     | 2.800643912 | 1.65904994  | 1.211754333 | 1.369130603 | 0.170958454    | 0.243041517 |
| Gm13608   | 0.678074457 | 1.658645123 | 2.730012435 | 0.607559549 | 0.543479636 NA |             |
| Aldh6a1   | 4591.970894 | 1.658146784 | 0.201193783 | 8.241540865 | 1.70E-16       | 1.99E-15    |
| Trpv3     | 1.924770729 | 1.658018269 | 1.39372599  | 1.189630014 | 0.234191844    | 0.316980019 |
| Dmac2     | 589.2953911 | 1.657999801 | 0.200706365 | 8.260823213 | 1.45E-16       | 1.71E-15    |
| Mansc4    | 2.835466965 | 1.657466441 | 1.378808803 | 1.202100275 | 0.22932468     | 0.311533488 |
| Gm5617    | 187.7793974 | 1.657259568 | 0.274433045 | 6.038848438 | 1.55E-09       | 8.81E-09    |
| Gm15076   | 0.657866298 | 1.656056398 | 3.427363404 | 0.483186696 | 0.628963181 NA |             |
| Hsd17b12  | 2150.603676 | 1.655867998 | 0.2851109   | 5.807803207 | 6.33E-09       | 3.35E-08    |
| Lrrd1     | 5.88271501  | 1.65505778  | 1.022634519 | 1.618425498 | 0.105570931    | 0.161558109 |
| Nek10     | 0.431457279 | 1.654765782 | 3.638929514 | 0.454739718 | 0.649296503 NA |             |
| Acbd5     | 3285.608913 | 1.654180358 | 0.162097748 | 10.20483246 | 1.89E-24       | 4.24E-23    |
| Cyp17a1   | 47.29088095 | 1.653838696 | 0.750226461 | 2.204452632 | 0.027492528    | 0.049823872 |
| Ociad2    | 384.0874307 | 1.653797502 | 0.412725285 | 4.00701765  | 6.15E-05       | 0.000192064 |
| Der12     | 1614.574231 | 1.653459094 | 0.215112656 | 7.68647983  | 1.51E-14       | 1.48E-13    |
| Sytl4     | 33.37847822 | 1.653383011 | 0.363762451 | 4.545227267 | 5.49E-06       | 2.01E-05    |
| Tmem97    | 1054.936534 | 1.651268174 | 0.233006527 | 7.086789343 | 1.37E-12       | 1.11E-11    |
| Acad5b    | 1747.362674 | 1.650567199 | 0.159437866 | 10.3524165  | 4.08E-25       | 9.70E-24    |



|               |             |             |             |                |                |             |
|---------------|-------------|-------------|-------------|----------------|----------------|-------------|
| Ciart         | 39.72665216 | 1.649790025 | 0.635411107 | 2.596413578    | 0.00942026     | 0.019242343 |
| Avil          | 6.589083732 | 1.649357078 | 0.770422887 | 2.140846419    | 0.032286425    | 0.057467005 |
| Ttc39b        | 397.9219439 | 1.648720972 | 0.210998368 | 7.813903922    | 5.54E-15       | 5.65E-14    |
| Senp8         | 27.54125773 | 1.647999267 | 0.599321926 | 2.749773029    | 0.005963656    | 0.012746791 |
| Ptms          | 10121.82109 | 1.647126377 | 0.234016284 | 7.03851179     | 1.94E-12       | 1.54E-11    |
| Amy2a5        | 0.634903425 | 1.646862835 | 3.42483189  | 0.480859466    | 0.630616383 NA |             |
| Gfra1         | 1229.812508 | 1.646478353 | 0.325875957 | 5.052469561    | 4.36E-07       | 1.84E-06    |
| Rdh10         | 339.7848067 | 1.646145725 | 0.218011634 | 7.55072421     | 4.33E-14       | 4.06E-13    |
| Lamp2         | 7510.643325 | 1.646087689 | 0.173405426 | 9.492711538    | 2.25E-21       | 4.02E-20    |
| Npy4r         | 0.567536724 | 1.64606314  | 2.483042744 | 0.66292179     | 0.507380645 NA |             |
| Hbb-bt        | 269.7929278 | 1.646013043 | 0.450111467 | 3.656900932    | 0.000255283    | 0.000719112 |
| Kcnk9         | 0.634685201 | 1.645145805 | 3.425135061 | 0.480315601    | 0.631002997 NA |             |
| Gm18190       | 6.239573385 | 1.6450835   | 0.82114175  | 2.003409887    | 0.045133311    | 0.077198022 |
| Pcp4l1        | 96.06109539 | 1.643034149 | 0.303786122 | 5.408522737    | 6.35E-08       | 2.99E-07    |
| Dpys          | 2697.422756 | 1.642863337 | 0.227366787 | 7.22560826     | 4.99E-13       | 4.21E-12    |
| Olfr1309      | 5.273047939 | 1.642762087 | 0.978085892 | 1.679568329    | 0.093041334    | 0.145184807 |
| Slc25a13      | 2186.199593 | 1.642472333 | 0.159780986 | 10.27952309    | 8.72E-25       | 2.03E-23    |
| Apol9b        | 1796.713533 | 1.641829252 | 0.361416564 | 4.542761504    | 5.55E-06       | 2.03E-05    |
| Mpst          | 1398.520739 | 1.641183226 | 0.18436598  | 8.90176824     | 5.50E-19       | 8.04E-18    |
| 1700014D04Rik | 0.448221038 | 1.641131182 | 3.004813601 | 0.546167384    | 0.584950884 NA |             |
| Atp5pb        | 4424.383544 | 1.641020711 | 0.202150925 | 8.117799663    | 4.75E-16       | 5.35E-15    |
| Apoe          | 308490.5031 | 1.639615237 | 0.176344804 | 9.297780269    | 1.43E-20       | 2.39E-19    |
| Gm9493        | 2.515029688 | 1.639461313 | 1.583620322 | 1.035261603    | 0.300546757    | 0.39017066  |
| Gm5447        | 1.592296998 | 1.63901832  | 1.645068263 | 0.996322376    | 0.319093535 NA |             |
| Tbc1d30       | 132.0523949 | 1.638442988 | 0.310166017 | 5.282470995    | 1.27E-07       | 5.78E-07    |
| Crip3         | 15.80272739 | 1.638132061 | 0.995050193 | 1.646280833    | 0.099705954    | 0.15398017  |
| Apon          | 4463.793403 | 1.637098003 | 0.444207346 | 3.685436585    | 0.000228311    | 0.000649032 |
| Emc9          | 393.0347489 | 1.636924917 | 0.273231407 | 5.99098374     | 2.09E-09       | 1.17E-08    |
| Gm20472       | 0.655037534 | 1.636525218 | 3.431015636 | 0.476979819    | 0.633376492 NA |             |
| Sycp3         | 1.005507888 | 1.636509259 | 1.892390504 | 0.864784121    | 0.387157288 NA |             |
| Gm2573        | 0.84783387  | 1.636229059 | 2.014246417 | 0.812328147    | 0.416603364 NA |             |
| Ndufs6        | 1130.239137 | 1.635994071 | 0.226435036 | 7.225004148    | 5.01E-13       | 4.22E-12    |
| Errfi1        | 14517.97618 | 1.635344832 | 0.315408865 | 5.18484106     | 2.16E-07       | 9.55E-07    |
| Scara5        | 126.6312549 | 1.634758075 | 0.639706042 | 2.555483251    | 0.010604046    | 0.021388758 |
| Tspan31       | 3673.879298 | 1.633982176 | 0.195843923 | 8.343287625    | 7.23E-17       | 8.79E-16    |
| Il18          | 159.5375522 | 1.633797264 | 0.264085402 | 6.186624679    | 6.15E-10       | 3.66E-09    |
| Gm18113       | 1.661794368 | 1.633529264 | 1.35723648  | 1.203570113    | 0.228755777    | 0.310817605 |
| Rcl1          | 1627.300336 | 1.633366784 | 0.199585443 | 8.183797187    | 2.75E-16       | 3.18E-15    |
| Zfp977        | 8.837721058 | 1.632230512 | 0.719999848 | 2.266987301    | 0.023391002    | 0.04322232  |
| Chac2         | 379.5548904 | 1.631571563 | 0.240822068 | 6.775008519    | 1.24E-11       | 9.01E-11    |
| Tex45         | 0.917628134 | 1.630220913 | 2.542267293 | 0.641246858    | 0.52136231 NA  |             |
| Slc22a3       | 46.61250513 | 1.630215705 | 1.407752403 | 1.158027293 NA | NA             |             |
| F9            | 2508.953759 | 1.629406928 | 0.249021772 | 6.543230802    | 6.02E-11       | 4.05E-10    |
| Higd1a        | 871.1090628 | 1.629344812 | 0.217064069 | 7.506285215    | 6.08E-14       | 5.62E-13    |
| Gjb1          | 9334.937089 | 1.628197119 | 0.216530018 | 7.519498374    | 5.50E-14       | 5.10E-13    |
| Olfr1471      | 3.068419671 | 1.627503518 | 1.109692554 | 1.466625608    | 0.14247793     | 0.208351668 |
| Scrn3         | 684.1685744 | 1.627402764 | 0.228671251 | 7.116779031    | 1.10E-12       | 8.98E-12    |
| Mettl27       | 308.6597081 | 1.626944751 | 0.222556117 | 7.310267518    | 2.67E-13       | 2.31E-12    |
| Gm10221       | 400.0762701 | 1.625860183 | 0.247878362 | 6.559104915    | 5.41E-11       | 3.65E-10    |
| Gm44954       | 6.26903875  | 1.624927084 | 0.870723515 | 1.866180316    | 0.062016142    | 0.101697883 |
| Fcer2a        | 18.06259986 | 1.624673031 | 0.482119558 | 3.369855056    | 0.000752077    | 0.001941645 |
| Omd           | 33.26264943 | 1.62430947  | 0.443689508 | 3.660914762    | 0.000251316    | 0.000708667 |
| Gm9894        | 5.715478618 | 1.624106302 | 0.924900125 | 1.755980194    | 0.07909179     | 0.125991109 |
| Dhrs1         | 1263.633293 | 1.623488169 | 0.195273433 | 8.313922405    | 9.26E-17       | 1.11E-15    |
| Abcc6         | 3163.091202 | 1.623082064 | 0.192041733 | 8.451715362    | 2.87E-17       | 3.64E-16    |
| Gm18180       | 1.602006575 | 1.622990713 | 2.285548856 | 0.710109832    | 0.47763603 NA  |             |
| H4f16         | 15.71760341 | 1.621437281 | 0.540913205 | 2.997592341    | 0.002721214    | 0.006256407 |
| Mcee          | 735.5203171 | 1.62126528  | 0.185572789 | 8.73654637     | 2.40E-18       | 3.34E-17    |
| Xkr9          | 281.1062431 | 1.621036798 | 0.237935272 | 6.812931884    | 9.56E-12       | 7.04E-11    |
| Olfr981       | 7.888711236 | 1.620978971 | 0.682707583 | 2.374338606    | 0.01758042     | 0.033517222 |
| Zfp595        | 112.5376607 | 1.620380788 | 0.223509643 | 7.249713097    | 4.18E-13       | 3.54E-12    |
| Atp5g1        | 2619.937342 | 1.620349425 | 0.192369269 | 8.423119955    | 3.67E-17       | 4.60E-16    |
| Ftl1          | 50620.08132 | 1.620190191 | 0.220363028 | 7.352368522    | 1.95E-13       | 1.71E-12    |
| Stard10       | 11636.60504 | 1.619781087 | 0.184691875 | 8.770180535    | 1.78E-18       | 2.50E-17    |
| Gm45344       | 7.680808951 | 1.618863641 | 0.967402509 | 1.673412697    | 0.09424608     | 0.14679828  |
| Josd2         | 931.6234759 | 1.616508569 | 0.192622474 | 8.392107795    | 4.78E-17       | 5.92E-16    |

|               |             |             |             |             |             |    |             |
|---------------|-------------|-------------|-------------|-------------|-------------|----|-------------|
| Olf1r361      | 1.449574084 | 1.615174905 | 1.444497645 | 1.118156828 | 0.263500019 | NA |             |
| Etfa          | 4367.055716 | 1.612256112 | 0.226643843 | 7.113610892 | 1.13E-12    |    | 9.18E-12    |
| Arhgap42      | 780.6030611 | 1.611832483 | 0.192116298 | 8.389878951 | 4.87E-17    |    | 6.03E-16    |
| Slc17a4       | 350.7579379 | 1.608264942 | 0.421623495 | 3.814457593 | 0.000136482 |    | 0.00040339  |
| Slc25a10      | 2534.978251 | 1.607348904 | 0.286994195 | 5.600632107 | 2.14E-08    |    | 1.06E-07    |
| Spo11         | 3.194688194 | 1.607075558 | 1.028098917 | 1.563152661 | 0.118016692 |    | 0.177891119 |
| Klh121        | 421.1755683 | 1.606893833 | 0.257330695 | 6.244470097 | 4.25E-10    |    | 2.58E-09    |
| Apoa1         | 157206.5778 | 1.604566219 | 0.314669786 | 5.099206498 | 3.41E-07    |    | 1.46E-06    |
| Dlat          | 688.6628547 | 1.604559908 | 0.228426992 | 7.024388373 | 2.15E-12    |    | 1.70E-11    |
| Gm10037       | 8.566941507 | 1.604524672 | 0.834052877 | 1.923768523 | 0.054383605 |    | 0.090690765 |
| Plcxd1        | 10.51550993 | 1.603720963 | 0.651606441 | 2.461180341 | 0.013848074 |    | 0.02709537  |
| Upb1          | 4956.483352 | 1.60336557  | 0.215150016 | 7.452314436 | 9.17E-14    |    | 8.33E-13    |
| Rbp4          | 42439.45025 | 1.600782613 | 0.215921939 | 7.413709872 | 1.23E-13    |    | 1.10E-12    |
| Olf1r338      | 17.49527963 | 1.600680069 | 0.502662974 | 3.184400186 | 0.001450543 |    | 0.003537242 |
| Gm2531        | 0.392594623 | 1.599628919 | 3.214648058 | 0.497606236 | 0.618761608 | NA |             |
| Gm13689       | 0.394306994 | 1.598859574 | 3.603447382 | 0.443702767 | 0.657257495 | NA |             |
| Pet100        | 292.3713996 | 1.598474244 | 0.164478642 | 9.71843045  | 2.52E-22    |    | 4.81E-21    |
| Tppp          | 66.14224329 | 1.597286441 | 0.531739361 | 3.003889794 | 0.002665519 |    | 0.006136632 |
| Gm5970        | 70.82600319 | 1.597139151 | 0.358252989 | 4.458132104 | 8.27E-06    |    | 2.95E-05    |
| Tgfr3l        | 171.9111123 | 1.597033357 | 0.327717927 | 4.873194975 | 1.10E-06    |    | 4.41E-06    |
| Gm4841        | 34.99799006 | 1.597001315 | 0.451885443 | 3.534084444 | 0.00040919  |    | 0.001110632 |
| Atg101        | 490.7420481 | 1.59678693  | 0.137769016 | 11.59031961 | 4.61E-31    |    | 1.76E-29    |
| Gm16419       | 0.392727348 | 1.595745654 | 3.603809734 | 0.442794091 | 0.657914678 | NA |             |
| Gm37515       | 34.2246485  | 1.594435908 | 0.331421618 | 4.810898928 | 1.50E-06    |    | 5.91E-06    |
| Esp6          | 0.39229864  | 1.594325176 | 3.215357081 | 0.495847004 | 0.620002359 | NA |             |
| Lrrc29        | 97.21812323 | 1.594195078 | 0.250709487 | 6.358734551 | 2.03E-10    |    | 1.28E-09    |
| Olf1r328      | 3.363491555 | 1.593959309 | 1.529433219 | 1.042189544 | 0.29732381  |    | 0.3868409   |
| Atg5          | 672.5512574 | 1.593638213 | 0.166481605 | 9.572458266 | 1.04E-21    |    | 1.92E-20    |
| Arhgef15      | 203.7013841 | 1.593398915 | 0.216354304 | 7.364766425 | 1.77E-13    |    | 1.56E-12    |
| Hoxc6         | 1.03997033  | 1.593083089 | 1.907456699 | 0.835187027 | 0.403612413 | NA |             |
| Sdha          | 4780.768392 | 1.592777032 | 0.192334488 | 8.281286683 | 1.22E-16    |    | 1.45E-15    |
| Ak4           | 543.9431504 | 1.591525984 | 0.280256557 | 5.678818007 | 1.36E-08    |    | 6.90E-08    |
| Gm10284       | 2.646600293 | 1.591426726 | 1.277779994 | 1.245462234 | 0.212961889 |    | 0.292387396 |
| Aars          | 3078.440152 | 1.590556119 | 0.249838569 | 6.36633536  | 1.94E-10    |    | 1.23E-09    |
| Epgn          | 0.393149431 | 1.590196722 | 3.603608521 | 0.441278988 | 0.659011036 | NA |             |
| Oaz3          | 3.347804722 | 1.58949327  | 1.036570551 | 1.533415423 | 0.125173531 |    | 0.186877867 |
| Akr1c14       | 4018.294359 | 1.589389618 | 0.312940146 | 5.078893325 | 3.80E-07    |    | 1.62E-06    |
| Gm10290       | 0.392004213 | 1.588975714 | 3.216063085 | 0.494074796 | 0.621253357 | NA |             |
| Olf1r1369-ps1 | 4.645691418 | 1.588700875 | 0.964018682 | 1.647998015 | 0.099353078 |    | 0.153532567 |
| Insl6         | 3.77892469  | 1.588657593 | 1.026137214 | 1.548192163 | 0.121576038 |    | 0.18235336  |
| Gm45594       | 0.391975137 | 1.58845658  | 3.216132482 | 0.49390272  | 0.621374884 | NA |             |
| Mapk4         | 9.705013085 | 1.58827573  | 0.87038434  | 1.824798146 | 0.068031496 |    | 0.110425682 |
| Oxld1         | 158.1692812 | 1.585677518 | 0.279098371 | 5.681428782 | 1.34E-08    |    | 6.81E-08    |
| Gm13928       | 0.391803127 | 1.585276686 | 3.216545723 | 0.492850661 | 0.622118112 | NA |             |
| Fh1           | 2715.14194  | 1.584808576 | 0.333799508 | 4.74778583  | 2.06E-06    |    | 7.94E-06    |
| Olf1r954      | 2.018758994 | 1.583914528 | 1.422909828 | 1.113151724 | 0.265643272 |    | 0.351524219 |
| Zfp988        | 0.960942514 | 1.583839119 | 2.624775264 | 0.603418945 | 0.546230023 | NA |             |
| Ptk6          | 13.31598407 | 1.583733439 | 0.618731892 | 2.559644102 | 0.010477941 |    | 0.021159433 |
| Cycs          | 1266.796762 | 1.583715798 | 0.1813199   | 8.734373887 | 2.45E-18    |    | 3.40E-17    |
| Utp14b-ps1    | 0.391043008 | 1.583046668 | 3.604048071 | 0.439241275 | 0.660486721 | NA |             |
| Gm49380       | 0.390923132 | 1.582135389 | 3.604065217 | 0.438986337 | 0.660671436 | NA |             |
| Atp5j         | 3470.720728 | 1.58196302  | 0.234117483 | 6.757133227 | 1.41E-11    |    | 1.01E-10    |
| Ccdc30        | 74.85329616 | 1.581118769 | 0.24329459  | 6.498783089 | 8.10E-11    |    | 5.35E-10    |
| Zcchc24       | 1293.024965 | 1.580776885 | 0.239793572 | 6.592240451 | 4.33E-11    |    | 2.95E-10    |
| Acads         | 1989.796412 | 1.580389378 | 0.133937076 | 11.79949138 | 3.93E-32    |    | 1.63E-30    |
| Lix1          | 5.743351978 | 1.579427768 | 0.874843613 | 1.805382978 | 0.071014773 |    | 0.114559032 |
| Dpp4          | 1541.493305 | 1.579392169 | 0.279292782 | 5.654969521 | 1.56E-08    |    | 7.89E-08    |
| Mrps21        | 562.4678034 | 1.579278692 | 0.232160535 | 6.802528667 | 1.03E-11    |    | 7.52E-11    |
| Cela2a        | 11.029713   | 1.577779421 | 0.711573725 | 2.217309839 | 0.026601926 |    | 0.04839501  |
| Jun           | 2712.923277 | 1.577596646 | 0.231294712 | 6.820720778 | 9.06E-12    |    | 6.68E-11    |
| Adcy10        | 8.890022534 | 1.576114411 | 0.625538642 | 2.519611586 | 0.01174844  |    | 0.023455603 |
| Polr3g        | 107.1044627 | 1.575577423 | 0.297080977 | 5.303528486 | 1.14E-07    |    | 5.19E-07    |
| Rwdd3         | 135.2916063 | 1.574843803 | 0.267371152 | 5.890103676 | 3.86E-09    |    | 2.10E-08    |
| Cpb2          | 4474.819401 | 1.57473333  | 0.18793423  | 8.379172469 | 5.33E-17    |    | 6.58E-16    |
| Gm15335       | 1.075042591 | 1.573354111 | 1.894302954 | 0.830571534 | 0.406215721 | NA |             |
| Serpina1a     | 80559.12729 | 1.573350501 | 0.203423021 | 7.734377813 | 1.04E-14    |    | 1.03E-13    |

|               |             |             |             |             |             |             |
|---------------|-------------|-------------|-------------|-------------|-------------|-------------|
| Gucd1         | 2428.932721 | 1.573036631 | 0.162030764 | 9.708259069 | 2.78E-22    | 5.28E-21    |
| Gm26712       | 24.46454355 | 1.572545642 | 0.504783433 | 3.115287743 | 0.001837656 | 0.004376691 |
| Tox           | 42.68251172 | 1.571791817 | 0.46407897  | 3.386905932 | 0.000706856 | 0.001833052 |
| Spag4         | 16.31147742 | 1.571372675 | 0.651707122 | 2.411163882 | 0.015901701 | 0.030683894 |
| Atg3          | 1181.741928 | 1.571166265 | 0.19353798  | 8.11812889  | 4.73E-16    | 5.34E-15    |
| Ppp1r37       | 1376.539929 | 1.570082718 | 0.138707241 | 11.31939977 | 1.05E-29    | 3.62E-28    |
| Rmdn3         | 915.5186719 | 1.569651704 | 0.217196978 | 7.226857953 | 4.94E-13    | 4.17E-12    |
| C330022B21Rik | 3.900827453 | 1.568458677 | 0.993198329 | 1.579199875 | 0.114290219 | 0.173177464 |
| Cadm3         | 36.64035641 | 1.567546393 | 0.398740556 | 3.931243938 | 8.45E-05    | 0.000259045 |
| Hadh          | 4196.084708 | 1.56752147  | 0.196623504 | 7.972197817 | 1.56E-15    | 1.69E-14    |
| H4c3          | 7.450914811 | 1.56706697  | 0.659299517 | 2.376866554 | 0.017460404 | 0.033321948 |
| Iscu          | 1555.482285 | 1.566553364 | 0.138328776 | 11.32485525 | 9.88E-30    | 3.42E-28    |
| A430005L14Rik | 337.380827  | 1.566393457 | 0.206518019 | 7.584778612 | 3.33E-14    | 3.16E-13    |
| Coq9          | 1157.745728 | 1.565848915 | 0.194099773 | 8.067237221 | 7.19E-16    | 7.99E-15    |
| Egr1          | 4286.658349 | 1.565410506 | 0.655446001 | 2.38831346  | 0.016925898 | 0.032381631 |
| D3ErtD751e    | 133.5043874 | 1.565357457 | 0.24609886  | 6.360685515 | 2.01E-10    | 1.27E-09    |
| Tesk2         | 228.031055  | 1.565136204 | 0.193409758 | 8.092333169 | 5.85E-16    | 6.53E-15    |
| Muc3          | 3.509954234 | 1.564742712 | 2.604376243 | 0.600812849 | 0.547964645 | 0.633894365 |
| Ddi2          | 3101.339109 | 1.56436194  | 0.215069959 | 7.273735239 | 3.50E-13    | 2.99E-12    |
| Casp16        | 3.94010385  | 1.563950445 | 1.087230042 | 1.438472435 | 0.150300053 | 0.218292325 |
| Olfr1312      | 7.019329947 | 1.563874416 | 0.994055936 | 1.57322577  | 0.11566655  | 0.174982993 |
| Olfr157       | 3.820461384 | 1.563507696 | 0.883867255 | 1.768939495 | 0.076903972 | 0.122873376 |
| Mtfrp1        | 231.9513097 | 1.5633812   | 0.302985403 | 5.159922502 | 2.47E-07    | 1.08E-06    |
| Abcc2         | 9706.226912 | 1.563230341 | 0.227181743 | 6.88096818  | 5.94E-12    | 4.46E-11    |
| Ces2a         | 6298.738124 | 1.563146178 | 0.199469709 | 7.836509022 | 4.63E-15    | 4.76E-14    |
| Cntnap2       | 2.705562384 | 1.562392775 | 1.200663911 | 1.301274037 | 0.193164671 | 0.269305724 |
| Uqcrc1        | 3470.931431 | 1.560524321 | 0.133282137 | 11.70842812 | 1.15E-31    | 4.62E-30    |
| Mvk           | 377.087046  | 1.559320139 | 0.283869859 | 5.493081042 | 3.95E-08    | 1.90E-07    |
| Dnmbp         | 605.9558846 | 1.558681659 | 0.266454343 | 5.849713837 | 4.92E-09    | 2.64E-08    |
| Slc31a1       | 2258.503004 | 1.558640774 | 0.19883257  | 7.838961051 | 4.54E-15    | 4.67E-14    |
| Creb3l3       | 3673.465368 | 1.558327619 | 0.308992591 | 5.043252382 | 4.58E-07    | 1.93E-06    |
| Ndufaf6       | 154.9956167 | 1.557509989 | 0.243360423 | 6.400013499 | 1.55E-10    | 9.95E-10    |
| Pgm1          | 2576.316357 | 1.557285664 | 0.189953222 | 8.198258736 | 2.44E-16    | 2.83E-15    |
| C530008M17Rik | 3.864641058 | 1.55652172  | 1.140895255 | 1.364298531 | 0.172473628 | 0.244884685 |
| Lrrc51        | 29.67675428 | 1.555654891 | 0.404409531 | 3.846731526 | 0.000119704 | 0.000356706 |
| Abcb6         | 1000.858919 | 1.555491421 | 0.230173013 | 6.757922672 | 1.40E-11    | 1.01E-10    |
| Sgsm1         | 35.71999682 | 1.555224431 | 0.554075709 | 2.806880733 | 0.005002376 | 0.010877615 |
| Ndufaf2       | 197.6314483 | 1.554608003 | 0.203810151 | 7.627726073 | 2.39E-14    | 2.29E-13    |
| Coasy         | 1652.657916 | 1.5539448   | 0.212400645 | 7.316102063 | 2.55E-13    | 2.22E-12    |
| Bckdha        | 3822.547427 | 1.553475396 | 0.184114191 | 8.437564664 | 3.24E-17    | 4.09E-16    |
| Olfr20        | 4.270124328 | 1.553454636 | 1.305365787 | 1.190053126 | 0.234025512 | 0.316791085 |
| Esr1          | 121.1540204 | 1.553035277 | 0.394267933 | 3.939035228 | 8.18E-05    | 0.000251342 |
| Tmprss9       | 2.77395209  | 1.552710277 | 1.07050866  | 1.450441585 | 0.146935418 | 0.214117019 |
| Tlcl1         | 785.3950782 | 1.552177613 | 0.234037889 | 6.63216379  | 3.31E-11    | 2.28E-10    |
| Ndufb10       | 1781.783088 | 1.552106881 | 0.166100173 | 9.344402565 | 9.24E-21    | 1.57E-19    |
| Ndufaf1       | 450.1725157 | 1.551964988 | 0.178847808 | 8.677573435 | 4.04E-18    | 5.50E-17    |
| Tom7          | 711.7012673 | 1.551326598 | 0.171250199 | 9.058830922 | 1.32E-19    | 2.03E-18    |
| Slc25a16      | 755.5173657 | 1.551287931 | 0.154395371 | 10.04750285 | 9.42E-24    | 2.01E-22    |
| Grtp1         | 323.2503381 | 1.551044062 | 0.195627102 | 7.928574545 | 2.22E-15    | 2.35E-14    |
| Olfr904       | 2.123042634 | 1.549953374 | 1.463437875 | 1.059117985 | 0.28954605  | 0.378454425 |
| Hoga1         | 2420.701582 | 1.549670438 | 0.204617724 | 7.573490736 | 3.63E-14    | 3.44E-13    |
| Atp5j2        | 2335.216153 | 1.548739367 | 0.200704645 | 7.716509831 | 1.20E-14    | 1.18E-13    |
| Fgf9          | 6.891017147 | 1.547732084 | 0.807095609 | 1.917656429 | 0.05515459  | 0.091770003 |
| 6430550D23Rik | 40.17553079 | 1.547673767 | 0.304151839 | 5.088490581 | 3.61E-07    | 1.54E-06    |
| Atad3a        | 1022.894711 | 1.547283564 | 0.189027531 | 8.185493192 | 2.71E-16    | 3.14E-15    |
| Cd163         | 67.40279002 | 1.547232202 | 0.530806146 | 2.914872431 | 0.00355834  | 0.007986121 |
| Vmn1r47       | 15.37738195 | 1.547007582 | 0.503434749 | 3.072905843 | 0.002119854 | 0.004989544 |
| Spock1        | 1.855025429 | 1.546798967 | 1.368073209 | 1.130640493 | 0.258206437 | 0.343217242 |
| Tmprss11a     | 6.58904472  | 1.546424285 | 0.839040192 | 1.843087256 | 0.065316272 | 0.106433932 |
| Gm49328       | 2.900313493 | 1.544472548 | 1.054456587 | 1.464709469 | 0.1430002   | 0.209043682 |
| Zfp493        | 15.90698872 | 1.543155004 | 0.582315708 | 2.650031558 | 0.008048425 | 0.0167186   |
| Pdk2          | 1198.773933 | 1.542185404 | 0.307714417 | 5.011742436 | 5.39E-07    | 2.25E-06    |
| Bet1          | 913.44297   | 1.539715654 | 0.211995357 | 7.262968756 | 3.79E-13    | 3.23E-12    |
| Luc7l2        | 3680.811444 | 1.539134594 | 0.205954332 | 7.473183875 | 7.83E-14    | 7.14E-13    |
| Ndufb11       | 2001.179299 | 1.538124746 | 0.181659975 | 8.467053605 | 2.52E-17    | 3.21E-16    |
| Cisd1         | 1753.147727 | 1.538119554 | 0.21581209  | 7.127124131 | 1.02E-12    | 8.37E-12    |



|               |             |             |             |             |             |    |             |
|---------------|-------------|-------------|-------------|-------------|-------------|----|-------------|
| Gm48663       | 1.482624798 | 1.537291084 | 1.458691227 | 1.053883821 | 0.291936111 | NA |             |
| Ldlr          | 1994.658158 | 1.536714922 | 0.113182405 | 13.57733052 | 5.46E-42    |    | 4.77E-40    |
| Gm47654       | 95.12845164 | 1.536436133 | 0.428828721 | 3.582866672 | 0.000339844 |    | 0.000934311 |
| Gpr137c       | 17.12331747 | 1.534428291 | 0.556506982 | 2.757248952 | 0.005828995 |    | 0.01249814  |
| Fos           | 870.7920635 | 1.534120222 | 0.367421245 | 4.175371573 | 2.98E-05    |    | 9.76E-05    |
| Rmdn1         | 320.0414882 | 1.533906176 | 0.213967076 | 7.16888879  | 7.56E-13    |    | 6.28E-12    |
| Sirt3         | 1069.633428 | 1.532085844 | 0.229918415 | 6.663606506 | 2.67E-11    |    | 1.86E-10    |
| Meiob         | 111.7358342 | 1.531856781 | 0.378342766 | 4.048859703 | 5.15E-05    |    | 0.000162697 |
| Mn1           | 255.1033872 | 1.531623412 | 0.197063145 | 7.77224688  | 7.71E-15    |    | 7.76E-14    |
| Cyp2d22       | 3934.069375 | 1.531597444 | 0.23222329  | 6.595365376 | 4.24E-11    |    | 2.89E-10    |
| Erg28         | 1085.297599 | 1.531396869 | 0.206157351 | 7.428291353 | 1.10E-13    |    | 9.89E-13    |
| Proc          | 8403.609655 | 1.531066057 | 0.162075423 | 9.446626935 | 3.50E-21    |    | 6.14E-20    |
| Galm          | 1603.763037 | 1.530426114 | 0.166620223 | 9.185116212 | 4.11E-20    |    | 6.62E-19    |
| Gm13081       | 2.869956964 | 1.530175956 | 1.074699809 | 1.423817091 | 0.154499427 |    | 0.223383992 |
| Olfr1489      | 17.53759704 | 1.530140877 | 0.518259142 | 2.952462876 | 0.0031525   |    | 0.007162977 |
| Mug-ps1       | 6629.565945 | 1.529979885 | 0.345320036 | 4.430614283 | 9.40E-06    |    | 3.33E-05    |
| Vmn1r206      | 7.746449721 | 1.529727122 | 0.670736288 | 2.280668497 | 0.022568071 |    | 0.041860567 |
| Ndufs7        | 1260.959838 | 1.529412747 | 0.151044745 | 10.12556077 | 4.26E-24    |    | 9.32E-23    |
| Scube2        | 0.638432732 | 1.528404155 | 2.864217561 | 0.533620133 | 0.593604376 | NA |             |
| Ormdl3        | 1331.026919 | 1.526978006 | 0.197797008 | 7.7199247   | 1.16E-14    |    | 1.15E-13    |
| Olfr1425      | 3.535225577 | 1.526165328 | 1.128127968 | 1.352829972 | 0.176109955 |    | 0.249300217 |
| Prokr2        | 7.253018594 | 1.525664536 | 0.712004898 | 2.14277253  | 0.032131368 |    | 0.057238826 |
| H3c4          | 4.048764683 | 1.525497739 | 1.412515253 | 1.079986737 | 0.280148086 |    | 0.367693015 |
| Ccpg1os       | 115.2017364 | 1.525407441 | 0.232742428 | 6.554058295 | 5.60E-11    |    | 3.78E-10    |
| Aqp11         | 376.8043793 | 1.525126397 | 0.226770803 | 6.725408992 | 1.75E-11    |    | 1.24E-10    |
| Atg16l2       | 403.9015615 | 1.524407293 | 0.199811199 | 7.62923852  | 2.36E-14    |    | 2.27E-13    |
| Asic3         | 8.186905894 | 1.52415624  | 0.68847275  | 2.213822174 | 0.026841014 |    | 0.048793518 |
| Dhrs4         | 1756.152603 | 1.524144888 | 0.213773219 | 7.129727905 | 1.01E-12    |    | 8.23E-12    |
| Cyp2c68       | 3417.350133 | 1.52369278  | 0.333551828 | 4.568084031 | 4.92E-06    |    | 1.82E-05    |
| Selenoo       | 1310.620414 | 1.522507848 | 0.143786575 | 10.58866481 | 3.36E-26    |    | 8.61E-25    |
| Rilp          | 419.5351422 | 1.521053422 | 0.23867997  | 6.372773636 | 1.86E-10    |    | 1.18E-09    |
| Cryl1         | 298.5282127 | 1.521039386 | 0.27137781  | 5.604877513 | 2.08E-08    |    | 1.04E-07    |
| Zfp969        | 13.81453227 | 1.520785067 | 0.643693236 | 2.362592896 | 0.018147593 |    | 0.034490542 |
| Grik1         | 0.329465149 | 1.520350673 | 3.647007175 | 0.41687625  | 0.676768926 | NA |             |
| Chuk          | 1845.216989 | 1.520210344 | 0.122472769 | 12.41263963 | 2.23E-35    |    | 1.17E-33    |
| Ccnb2-ps      | 4.093261709 | 1.520071354 | 1.003973518 | 1.514055229 | 0.130011833 |    | 0.192969752 |
| Paqr7         | 525.2440101 | 1.518618483 | 0.227271513 | 6.681957035 | 2.36E-11    |    | 1.65E-10    |
| Optn          | 1256.176686 | 1.518433683 | 0.297664092 | 5.101165125 | 3.38E-07    |    | 1.45E-06    |
| Mccc2         | 1041.584076 | 1.518094465 | 0.173664362 | 8.74154287  | 2.30E-18    |    | 3.20E-17    |
| Gm14138       | 1.232461184 | 1.518023956 | 1.82603625  | 0.831321917 | 0.405791796 | NA |             |
| Mycbp         | 233.4167342 | 1.51794876  | 0.248391885 | 6.111104478 | 9.89E-10    |    | 5.78E-09    |
| Pdcd4         | 1239.266448 | 1.517554124 | 0.185821541 | 8.166728785 | 3.17E-16    |    | 3.64E-15    |
| Gm4297        | 1.430989019 | 1.517156599 | 1.516900215 | 1.000169019 | 0.31722872  | NA |             |
| Hepacam       | 2.66547891  | 1.51684417  | 1.649468397 | 0.919595775 | 0.357784035 |    | 0.450214218 |
| Ndufs8        | 1308.789675 | 1.515318285 | 0.118349156 | 12.80379464 | 1.56E-37    |    | 9.64E-36    |
| Gm9826        | 1.216323965 | 1.515158333 | 2.136321356 | 0.709237086 | 0.478177363 | NA |             |
| Akr1c13       | 1076.405407 | 1.51460205  | 0.239734099 | 6.317841534 | 2.65E-10    |    | 1.65E-09    |
| Palm3         | 1.277130931 | 1.514264271 | 2.522176205 | 0.600380048 | 0.548252982 | NA |             |
| Gm47659       | 4.915840875 | 1.514252881 | 1.111492195 | 1.362360336 | 0.173084195 |    | 0.245628848 |
| Cideb         | 3476.880132 | 1.513632831 | 0.221299081 | 6.839761043 | 7.93E-12    |    | 5.88E-11    |
| Pttg1         | 460.6923976 | 1.513151043 | 0.254818695 | 5.938147669 | 2.88E-09    |    | 1.59E-08    |
| Xk            | 63.60685017 | 1.512476778 | 0.421991252 | 3.584142497 | 0.000338187 |    | 0.000930357 |
| 1700024J04Rik | 4.734029834 | 1.512336376 | 0.960816998 | 1.574010846 | 0.115484942 |    | 0.174739264 |
| Lamtor4       | 696.1954117 | 1.511560013 | 0.158106664 | 9.560381408 | 1.17E-21    |    | 2.14E-20    |
| Olfr1160      | 3.015687798 | 1.510701991 | 0.98849026  | 1.528292237 | 0.126439996 |    | 0.188455067 |
| BC049715      | 7.555450008 | 1.51047691  | 0.685993498 | 2.201882256 | 0.027673627 |    | 0.050114721 |
| At12          | 1222.958482 | 1.510343193 | 0.191282555 | 7.895875257 | 2.88E-15    |    | 3.02E-14    |
| Gm20594       | 1961.332195 | 1.509928552 | 0.232456607 | 6.495528669 | 8.27E-11    |    | 5.46E-10    |
| Epb4114b      | 1262.865545 | 1.509665797 | 0.231221253 | 6.529096164 | 6.62E-11    |    | 4.42E-10    |
| Coq8a         | 4497.738494 | 1.508303708 | 0.341664108 | 4.414580494 | 1.01E-05    |    | 3.57E-05    |
| Cldn2         | 763.4757187 | 1.50817637  | 0.166386926 | 9.064272105 | 1.25E-19    |    | 1.93E-18    |
| Rps6-ps3      | 1.98642331  | 1.508106878 | 1.51086623  | 0.998173662 | 0.318195155 |    | 0.409617407 |
| D230025D16Rik | 1052.660202 | 1.507899085 | 0.237537362 | 6.348050148 | 2.18E-10    |    | 1.37E-09    |
| Tusc2         | 480.5174636 | 1.507556436 | 0.138911565 | 10.85263449 | 1.94E-27    |    | 5.48E-26    |
| Noxred1       | 7.415698067 | 1.50721317  | 0.780400376 | 1.931333218 | 0.053441858 |    | 0.089365061 |
| Olfr75-ps1    | 2.754418763 | 1.506537807 | 1.088507074 | 1.384040437 | 0.166346073 |    | 0.237410453 |

|               |             |             |             |             |             |             |
|---------------|-------------|-------------|-------------|-------------|-------------|-------------|
| Ptch2         | 10.05202066 | 1.50636663  | 0.696176006 | 2.163772691 | 0.030481799 | 0.054568278 |
| Kyat3         | 2306.772896 | 1.506132466 | 0.442313181 | 3.405126801 | 0.000661333 | 0.001724443 |
| Raet1d        | 271.1135156 | 1.505058811 | 0.478502907 | 3.145349359 | 0.001658886 | 0.003994448 |
| Acad8         | 743.9245529 | 1.5048018   | 0.221387217 | 6.797148533 | 1.07E-11    | 7.79E-11    |
| Acp5          | 2068.036277 | 1.502919659 | 0.229424446 | 6.550826155 | 5.72E-11    | 3.85E-10    |
| Olf39         | 3.415069146 | 1.502670196 | 1.017354536 | 1.477036906 | 0.139665745 | 0.204748612 |
| Sema4g        | 9037.612981 | 1.502543519 | 0.225594368 | 6.660376916 | 2.73E-11    | 1.90E-10    |
| Dkk1          | 1.929665112 | 1.502538574 | 1.826342513 | 0.822703608 | 0.410676563 | 0.50296078  |
| Dis3l         | 267.2398613 | 1.502002865 | 0.174866715 | 8.58941544  | 8.74E-18    | 1.16E-16    |
| Grpel1        | 1570.809421 | 1.500616167 | 0.105928205 | 14.16635131 | 1.48E-45    | 1.64E-43    |
| Flad1         | 661.0679218 | 1.499998665 | 0.197530737 | 7.593748136 | 3.11E-14    | 2.96E-13    |
| Mars          | 1096.708686 | 1.499505353 | 0.147669059 | 10.15449931 | 3.16E-24    | 7.01E-23    |
| Tbx15         | 0.954758339 | 1.499486591 | 1.941087328 | 0.772498264 | 0.439819375 | NA          |
| Rps6kl1       | 8.37972711  | 1.499480997 | 0.736518607 | 2.035903753 | 0.041760021 | 0.072049877 |
| Rpl7a-ps12    | 1.185142703 | 1.499363616 | 1.749902394 | 0.856826999 | 0.391540502 | NA          |
| Cfh           | 9640.408256 | 1.499190584 | 0.290693494 | 5.157289767 | 2.51E-07    | 1.10E-06    |
| Zfp445        | 1586.020894 | 1.499055222 | 0.170293886 | 8.802754208 | 1.33E-18    | 1.89E-17    |
| Thns12        | 828.1563539 | 1.498946904 | 0.336342818 | 4.456604462 | 8.33E-06    | 2.97E-05    |
| Fam13a        | 314.4130377 | 1.49887828  | 0.363019584 | 4.128918509 | 3.64E-05    | 0.000118106 |
| Gm14760       | 12.43101593 | 1.498459791 | 0.76422966  | 1.960745401 | 0.04990873  | 0.084241983 |
| Ndufa13       | 2345.749437 | 1.498145446 | 0.139368745 | 10.74950807 | 5.96E-27    | 1.62E-25    |
| Wdr91         | 357.3035808 | 1.497007096 | 0.273111323 | 5.481307329 | 4.22E-08    | 2.02E-07    |
| Bola3         | 687.3883829 | 1.496679941 | 0.211192088 | 7.08681824  | 1.37E-12    | 1.11E-11    |
| Slc35e2       | 974.0131099 | 1.495777456 | 0.189261604 | 7.90322718  | 2.72E-15    | 2.86E-14    |
| Slc6a17       | 1.945131815 | 1.495304696 | 1.370176548 | 1.091322646 | 0.275130936 | 0.362027802 |
| Mthfs         | 317.1402645 | 1.495295115 | 0.224869875 | 6.649601751 | 2.94E-11    | 2.04E-10    |
| Ndufb6        | 848.9652441 | 1.495131345 | 0.196186991 | 7.620950501 | 2.52E-14    | 2.41E-13    |
| Olf147        | 25.17048158 | 1.492275207 | 0.463173632 | 3.221848359 | 0.001273665 | 0.003149144 |
| Olf267        | 1.205850902 | 1.491741232 | 1.855663129 | 0.803885796 | 0.421462934 | NA          |
| Dnase1l3      | 248.0502347 | 1.491342706 | 0.573684191 | 2.599588291 | 0.009333566 | 0.019090419 |
| Pmpcb         | 1669.443173 | 1.491183764 | 0.273400577 | 5.454208556 | 4.92E-08    | 2.34E-07    |
| Gm13537       | 1.016927716 | 1.49035286  | 2.011784228 | 0.740811484 | 0.458807751 | NA          |
| Slc25a51      | 1140.953343 | 1.489791215 | 0.185426056 | 8.03442215  | 9.40E-16    | 1.04E-14    |
| Smok3a        | 2.004566952 | 1.488743819 | 1.655922545 | 0.899041941 | 0.368630321 | 0.460902803 |
| Atp5l         | 2730.960265 | 1.488544172 | 0.124595688 | 11.94699592 | 6.73E-33    | 2.93E-31    |
| Olf1645       | 2.638611907 | 1.488024373 | 1.483978372 | 1.002726456 | 0.315992862 | 0.407368898 |
| Gm10053       | 1386.672447 | 1.488005282 | 0.162084801 | 9.180412181 | 4.29E-20    | 6.91E-19    |
| Olf1788       | 1.071263939 | 1.48749885  | 1.855285915 | 0.801762595 | 0.422690299 | NA          |
| Gm15645       | 14.40782963 | 1.486662253 | 0.575268538 | 2.584292645 | 0.009757896 | 0.019851147 |
| Tes3-ps       | 2.103158326 | 1.486462256 | 1.466149087 | 1.013854777 | 0.310652053 | 0.401455139 |
| ligp1         | 5226.921508 | 1.48622185  | 0.311494445 | 4.771262774 | 1.83E-06    | 7.12E-06    |
| Gm48443       | 78.64292549 | 1.485243183 | 0.290267842 | 5.116802382 | 3.11E-07    | 1.34E-06    |
| Zfp345        | 6.150620744 | 1.485164159 | 0.713347835 | 2.081963504 | 0.037345803 | 0.065309904 |
| Mid1ip1       | 906.2552097 | 1.483694624 | 0.25580784  | 5.80003577  | 6.63E-09    | 3.50E-08    |
| Olf1318       | 1.175926368 | 1.483656662 | 2.063312285 | 0.719065491 | 0.472100568 | NA          |
| Paqr3         | 49.71115985 | 1.4836254   | 0.310684279 | 4.775347512 | 1.79E-06    | 6.99E-06    |
| Otud7a        | 2.82742834  | 1.483595175 | 1.219457639 | 1.21660247  | 0.223755503 | 0.305044687 |
| Gm9892        | 3.455763674 | 1.481522259 | 1.837747451 | 0.806162053 | 0.420149415 | 0.511987651 |
| Gm12712       | 0.976163007 | 1.481250926 | 1.938387348 | 0.764166629 | 0.44476795  | NA          |
| Psm4          | 1762.223652 | 1.480303169 | 0.143804854 | 10.29383311 | 7.51E-25    | 1.75E-23    |
| Pex6          | 1277.206264 | 1.479825838 | 0.163755565 | 9.036797253 | 1.61E-19    | 2.46E-18    |
| Ndufc1        | 596.4518907 | 1.479722567 | 0.252955774 | 5.849728375 | 4.92E-09    | 2.64E-08    |
| Thoc2l        | 110.6180732 | 1.479038078 | 0.287071114 | 5.15216615  | 2.57E-07    | 1.12E-06    |
| Gcat          | 1047.795952 | 1.479007772 | 0.30279666  | 4.884491703 | 1.04E-06    | 4.17E-06    |
| Pld5          | 2.814202302 | 1.47877774  | 1.304590319 | 1.133518867 | 0.256996423 | 0.341939828 |
| Olf1057       | 2.219595712 | 1.478338839 | 1.588233787 | 0.930806819 | 0.351953502 | 0.444287545 |
| Mul1          | 506.9559579 | 1.477913513 | 0.212740119 | 6.947037162 | 3.73E-12    | 2.86E-11    |
| 1700021F05Rik | 297.8904767 | 1.477232223 | 0.180144718 | 8.200252788 | 2.40E-16    | 2.78E-15    |
| Tuba8         | 34.69357377 | 1.477120262 | 0.501455448 | 2.945665995 | 0.003222602 | 0.00730765  |
| Gc            | 103483.1845 | 1.477112758 | 0.156956321 | 9.410979754 | 4.92E-21    | 8.52E-20    |
| Slc18a1       | 64.90896533 | 1.476882394 | 0.381016735 | 3.87616149  | 0.000106117 | 0.000319401 |
| Gm29288       | 41.83371885 | 1.476680194 | 0.347154275 | 4.253671348 | 2.10E-05    | 7.06E-05    |
| Gm18095       | 5.352579347 | 1.476647773 | 0.842766451 | 1.752143516 | 0.079749133 | 0.126862055 |
| Myo6          | 1072.224233 | 1.475362267 | 0.23778681  | 6.204558886 | 5.49E-10    | 3.29E-09    |
| Tex264        | 971.649408  | 1.474988146 | 0.15196352  | 9.706198838 | 2.84E-22    | 5.39E-21    |
| Serpina1b     | 95274.19168 | 1.474954714 | 0.171456193 | 8.602516433 | 7.80E-18    | 1.04E-16    |

|               |             |              |             |             |                |             |
|---------------|-------------|--------------|-------------|-------------|----------------|-------------|
| Vmn1r216      | 16.32249374 | 1.474517691  | 0.442477434 | 3.332413309 | 0.000860963    | 0.002202866 |
| Gm13835       | 253.9952428 | 1.474448636  | 1.578283604 | 0.934210197 | 0.350195477    | 0.442592645 |
| Park7         | 2542.693966 | 1.474327246  | 0.160904174 | 9.162765674 | 5.06E-20       | 8.07E-19    |
| Rec8          | 47.8387016  | 1.4741164484 | 0.415712917 | 3.546111811 | 0.00039096     | 0.001064541 |
| Vwa3a         | 2.375538809 | 1.472999952  | 1.168535903 | 1.260551728 | 0.2074704      | 0.286090012 |
| Tle5          | 8490.794206 | 1.472492823  | 0.166909466 | 8.822104917 | 1.12E-18       | 1.61E-17    |
| F13b          | 1942.586552 | 1.472439409  | 0.290519754 | 5.068293602 | 4.01E-07       | 1.70E-06    |
| Ccdc17        | 82.18655736 | 1.472077307  | 0.321004066 | 4.585852533 | 4.52E-06       | 1.68E-05    |
| Coq5          | 360.1805477 | 1.470615959  | 0.144628247 | 10.16824852 | 2.75E-24       | 6.11E-23    |
| Hoxa9         | 0.778243815 | 1.470434071  | 2.379501446 | 0.61795889  | 0.536602438 NA |             |
| H2bc4         | 2535.546871 | 1.468844866  | 0.298263305 | 4.924658314 | 8.45E-07       | 3.45E-06    |
| Ntn3          | 56.08435764 | 1.468680546  | 0.298002549 | 4.928416045 | 8.29E-07       | 3.39E-06    |
| Dnajc25       | 419.8571363 | 1.467752731  | 0.249838027 | 5.874817168 | 4.23E-09       | 2.29E-08    |
| Gm10184       | 4.52323763  | 1.467335438  | 3.371450361 | 0.4352238   | 0.663399989    | 0.737168753 |
| Disp2         | 26.98966608 | 1.466832028  | 0.402220515 | 3.646835439 | 0.00026549     | 0.000745278 |
| Pdpf          | 1085.906273 | 1.466344264  | 0.127376125 | 11.51192397 | 1.15E-30       | 4.26E-29    |
| Gm48270       | 69.76233583 | 1.466294851  | 0.318591962 | 4.602422613 | 4.18E-06       | 1.55E-05    |
| Elov12        | 4644.016137 | 1.466095761  | 0.21548132  | 6.803818364 | 1.02E-11       | 7.47E-11    |
| Sh3bgrl2      | 432.9050712 | 1.465976366  | 0.239088918 | 6.131511136 | 8.70E-10       | 5.10E-09    |
| Apoa          | 361.4786676 | 1.465286246  | 0.225416614 | 6.500347168 | 8.01E-11       | 5.30E-10    |
| Adgrb3        | 1.705555163 | 1.464097968  | 1.330377382 | 1.100513273 | 0.27110855     | 0.357673623 |
| Txn1          | 3596.222858 | 1.463962769  | 0.202446012 | 7.231373715 | 4.78E-13       | 4.05E-12    |
| Txlng         | 517.6455612 | 1.463851729  | 0.164871044 | 8.878767872 | 6.76E-19       | 9.82E-18    |
| Gm3435        | 26.37359706 | 1.463784749  | 0.468237607 | 3.126158015 | 0.001771064    | 0.004237627 |
| Mrps7         | 1032.239467 | 1.463697952  | 0.168530644 | 8.68505523  | 3.79E-18       | 5.16E-17    |
| Anapc13       | 664.3283401 | 1.462961887  | 0.207689119 | 7.043998714 | 1.87E-12       | 1.49E-11    |
| Fam166a       | 1.874132976 | 1.462651481  | 1.476501345 | 0.99061981  | 0.321871261    | 0.413259622 |
| N4bp2         | 434.0923746 | 1.462560619  | 0.263729487 | 5.545684832 | 2.93E-08       | 1.43E-07    |
| Olfr1124      | 3.656600552 | 1.461341671  | 1.051221066 | 1.390137353 | 0.164487172    | 0.235127696 |
| Tmem256       | 867.9773385 | 1.461225474  | 0.143165345 | 10.2065585  | 1.85E-24       | 4.18E-23    |
| 2610021A01Rik | 163.4283015 | 1.461114321  | 0.212288126 | 6.882694508 | 5.87E-12       | 4.41E-11    |
| Gm12424       | 32.15462101 | 1.460766786  | 0.433416869 | 3.370350559 | 0.000750726    | 0.001938855 |
| Xylb          | 3388.050337 | 1.46050289   | 0.226627923 | 6.444496648 | 1.16E-10       | 7.52E-10    |
| Gm12739       | 0.749428369 | 1.460237171  | 2.04820334  | 0.712935646 | 0.47588558 NA  |             |
| Ehd3          | 406.8962713 | 1.459551958  | 0.360615424 | 4.047391937 | 5.18E-05       | 0.000163599 |
| Hcfc1r1       | 620.9468051 | 1.458904144  | 0.198993998 | 7.331397728 | 2.28E-13       | 1.98E-12    |
| Mtus1         | 2184.608745 | 1.457268314  | 0.193708716 | 7.522987824 | 5.35E-14       | 4.97E-13    |
| Ppp2r1b       | 254.3776362 | 1.45720056   | 0.203083705 | 7.175369201 | 7.21E-13       | 6.00E-12    |
| Mroh8         | 2.469539584 | 1.457158007  | 1.153105891 | 1.263681002 | 0.206344547    | 0.28488515  |
| Kynu          | 2536.619166 | 1.456453407  | 0.254605176 | 5.720439107 | 1.06E-08       | 5.50E-08    |
| Atp5md        | 1702.411479 | 1.456020053  | 0.144017116 | 10.11004871 | 4.99E-24       | 1.08E-22    |
| Ndufb7        | 1309.792105 | 1.455425778  | 0.163162825 | 8.920081977 | 4.66E-19       | 6.88E-18    |
| Chchd2        | 5825.75172  | 1.455033561  | 0.131056754 | 11.10231649 | 1.22E-28       | 3.80E-27    |
| L2hgdh        | 688.2458628 | 1.454846356  | 0.189694004 | 7.669437735 | 1.73E-14       | 1.68E-13    |
| Cox7a2        | 1968.262373 | 1.454658119  | 0.232352229 | 6.260573118 | 3.84E-10       | 2.34E-09    |
| Gfm1          | 933.3005633 | 1.454648531  | 0.23052344  | 6.310197905 | 2.79E-10       | 1.73E-09    |
| Ube2ql1       | 1.006736037 | 1.454344213  | 2.25336279  | 0.645410592 | 0.518661141 NA |             |
| Cyp4f13       | 1082.896453 | 1.453944738  | 0.171101522 | 8.497555841 | 1.94E-17       | 2.50E-16    |
| AL611930.1    | 6.594011253 | 1.453865046  | 0.978648803 | 1.485584044 | 0.137389178    | 0.202036635 |
| Sec24a        | 1526.208652 | 1.453623655  | 0.16860905  | 8.621267102 | 6.62E-18       | 8.89E-17    |
| Tmprss11b     | 2.444974064 | 1.453372239  | 1.539717371 | 0.943921441 | 0.345209795    | 0.437524093 |
| Olfr801       | 0.979176365 | 1.452470599  | 1.939530972 | 0.748877239 | 0.4539312 NA   |             |
| Rnf17         | 4.251058461 | 1.452381036  | 1.072199905 | 1.354580456 | 0.175551264    | 0.248658443 |
| Fcna          | 197.9359535 | 1.452293237  | 0.535824519 | 2.710389664 | 0.00672042     | 0.014196992 |
| Mtss1         | 2638.632121 | 1.451800608  | 0.256599447 | 5.657847756 | 1.53E-08       | 7.76E-08    |
| Cd55          | 105.4653093 | 1.451173079  | 0.436870995 | 3.321742793 | 0.000894571    | 0.002279619 |
| lqcc          | 150.7072655 | 1.451029008  | 0.254144416 | 5.709466415 | 1.13E-08       | 5.83E-08    |
| Ndufa5        | 1032.624465 | 1.450948491  | 0.231172192 | 6.276483684 | 3.46E-10       | 2.12E-09    |
| Olfr814       | 3.630674315 | 1.450346036  | 1.011511388 | 1.433840541 | 0.151617773    | 0.219925108 |
| Pex1          | 452.7693019 | 1.449770577  | 0.34462406  | 4.206817643 | 2.59E-05       | 8.58E-05    |
| Cox4i1        | 5648.009833 | 1.449213348  | 0.120241524 | 12.05251974 | 1.88E-33       | 8.53E-32    |
| Ppa2          | 659.6745011 | 1.448978547  | 0.170768245 | 8.485058504 | 2.16E-17       | 2.77E-16    |
| Pdk1          | 656.7849929 | 1.448674941  | 0.290580176 | 4.985456887 | 6.18E-07       | 2.56E-06    |
| Pafah2        | 1515.821843 | 1.448579751  | 0.11990638  | 12.0809231  | 1.33E-33       | 6.15E-32    |
| Pard3         | 1021.411028 | 1.448517399  | 0.185529565 | 7.807474759 | 5.83E-15       | 5.93E-14    |
| Cers2         | 4718.071352 | 1.447812691  | 0.173129643 | 8.362592696 | 6.14E-17       | 7.51E-16    |

|               |             |             |             |             |                |             |
|---------------|-------------|-------------|-------------|-------------|----------------|-------------|
| Acot13        | 766.7047593 | 1.446005688 | 0.200327412 | 7.218211788 | 5.27E-13       | 4.43E-12    |
| Gm14327       | 138.1410808 | 1.445869571 | 0.441586008 | 3.274264911 | 0.001059372    | 0.002657081 |
| Clrn1         | 8.894328158 | 1.44586931  | 0.788937568 | 1.832678996 | 0.066850323    | 0.108663644 |
| AC122494.1    | 1.665514231 | 1.445600557 | 1.80339098  | 0.801601302 | 0.422783624    | 0.514545909 |
| Gm6749        | 0.477462084 | 1.445531359 | 2.574574354 | 0.561464211 | 0.574481121 NA |             |
| Gm5457        | 0.487807454 | 1.44546015  | 3.003575281 | 0.481246519 | 0.630341302 NA |             |
| Timm9         | 498.844647  | 1.445299847 | 0.266786412 | 5.417441743 | 6.05E-08       | 2.85E-07    |
| Cyp2a12       | 10399.90321 | 1.445114905 | 0.217934444 | 6.630961486 | 3.34E-11       | 2.30E-10    |
| Gm45268       | 10.89155474 | 1.445035562 | 0.628929174 | 2.297612548 | 0.021583851    | 0.04021437  |
| Sdhd          | 2201.143622 | 1.444896664 | 0.167600228 | 8.621090068 | 6.63E-18       | 8.90E-17    |
| Macc1         | 19.06050923 | 1.444673914 | 0.580243883 | 2.489770176 | 0.012782572    | 0.025248209 |
| Gm1123        | 1.464217822 | 1.444472937 | 2.439569506 | 0.592101571 | 0.553782575 NA |             |
| Cps1          | 38615.04625 | 1.44421953  | 0.348778908 | 4.140788044 | 3.46E-05       | 0.000112563 |
| Olfr398       | 5.178390574 | 1.442959826 | 0.767532277 | 1.879998886 | 0.06010823     | 0.098978567 |
| Zswim5        | 36.00205973 | 1.442933736 | 0.572338093 | 2.521121261 | 0.011698153    | 0.023363415 |
| Dus1l         | 1066.972218 | 1.442884987 | 0.176317411 | 8.183451511 | 2.76E-16       | 3.19E-15    |
| Gm15459       | 32.43763502 | 1.442679464 | 1.546163895 | 0.933070206 | 0.350783721    | 0.44310617  |
| Gfm2          | 641.3721384 | 1.442141708 | 0.204004972 | 7.069149821 | 1.56E-12       | 1.25E-11    |
| Gm4853        | 0.480179132 | 1.441255442 | 3.017405676 | 0.477647223 | 0.632901314 NA |             |
| Dhrs11        | 355.3720664 | 1.440643755 | 0.227239413 | 6.339761818 | 2.30E-10       | 1.45E-09    |
| Sec62         | 2320.293171 | 1.44064326  | 0.163171368 | 8.829019956 | 1.06E-18       | 1.52E-17    |
| Gm6142        | 0.485920582 | 1.440408434 | 3.006439186 | 0.47910779  | 0.631861948 NA |             |
| Plag1         | 4.168043928 | 1.440162166 | 1.188336155 | 1.211914793 | 0.225544999    | 0.307091378 |
| Dlg1          | 1041.078969 | 1.439439567 | 0.12908067  | 11.1514727  | 7.04E-29       | 2.23E-27    |
| Slc2a9        | 608.0564003 | 1.439159943 | 0.198539297 | 7.248740988 | 4.21E-13       | 3.57E-12    |
| Pop5          | 355.8362859 | 1.438872873 | 0.14828739  | 9.703271935 | 2.92E-22       | 5.54E-21    |
| Cfhr2         | 8368.426546 | 1.438863283 | 0.195115161 | 7.374430957 | 1.65E-13       | 1.46E-12    |
| Gm14034       | 0.46061005  | 1.437763293 | 2.599017336 | 0.553194961 | 0.580129917 NA |             |
| Tmem79        | 31.18365415 | 1.437565972 | 0.400343856 | 3.590828108 | 0.000329629    | 0.000909012 |
| Gm5802        | 0.638653514 | 1.437545441 | 2.473104525 | 0.581271607 | 0.561057414 NA |             |
| Sirt5         | 286.8526011 | 1.437281802 | 0.238602178 | 6.023758098 | 1.70E-09       | 9.64E-09    |
| Gm48401       | 8.039310855 | 1.436924906 | 0.774436618 | 1.855445459 | 0.063532641    | 0.103874984 |
| Nxph1         | 1.25974234  | 1.436760792 | 1.784240328 | 0.805250711 | 0.420675018 NA |             |
| Rpl12-ps2     | 0.462258719 | 1.436219015 | 3.051711294 | 0.470627421 | 0.637906823 NA |             |
| 9030025P20Rik | 100.4325892 | 1.435825309 | 0.261131    | 5.498486611 | 3.83E-08       | 1.84E-07    |
| Ndufb2        | 822.8884707 | 1.434581465 | 0.180493694 | 7.948097424 | 1.89E-15       | 2.03E-14    |
| Gm26558       | 1.273149274 | 1.434016717 | 1.88132621  | 0.762237144 | 0.445918481 NA |             |
| Msmg          | 1.996857518 | 1.433827086 | 1.972408383 | 0.7269423   | 0.467261303    | 0.557834082 |
| Ndufb8        | 1689.479907 | 1.432881265 | 0.116638137 | 12.28484354 | 1.09E-34       | 5.45E-33    |
| Gm13991       | 0.478367625 | 1.432633081 | 3.02056441  | 0.474293174 | 0.635290858 NA |             |
| Tmem69        | 182.29837   | 1.432080752 | 0.208180845 | 6.879022679 | 6.03E-12       | 4.52E-11    |
| Vmn1r9        | 12.11183897 | 1.431680542 | 0.615340472 | 2.326647778 | 0.019984019    | 0.037549605 |
| Gm11224       | 0.475833784 | 1.431549733 | 2.576865151 | 0.55553925  | 0.578525871 NA |             |
| Dmbx1         | 0.752329991 | 1.43133212  | 2.270500005 | 0.630403927 | 0.528430342 NA |             |
| Gcnt3         | 1.74006352  | 1.431230435 | 1.815761944 | 0.788225813 | 0.430564633    | 0.522134833 |
| Gm14403       | 66.90298444 | 1.430969326 | 0.39045191  | 3.664905433 | 0.00024743     | 0.000698838 |
| Auh           | 702.7512252 | 1.430887934 | 0.158271329 | 9.040727336 | 1.56E-19       | 2.38E-18    |
| Gm14853       | 0.628999826 | 1.430576744 | 2.47927958  | 0.577013079 | 0.56393062 NA  |             |
| Adk           | 7283.75288  | 1.429762252 | 0.2118418   | 6.749197992 | 1.49E-11       | 1.07E-10    |
| Vegfa         | 3541.41367  | 1.429674388 | 0.193128634 | 7.402705428 | 1.33E-13       | 1.19E-12    |
| Gatd3a        | 1375.08458  | 1.429151246 | 0.165224444 | 8.649756731 | 5.16E-18       | 6.97E-17    |
| Olfr718-ps1   | 37.07000097 | 1.429054782 | 0.400853874 | 3.565026743 | 0.000363819    | 0.000997168 |
| 2610028H24Rik | 0.459478698 | 1.428913805 | 2.600801982 | 0.549412764 | 0.582722217 NA |             |
| Acy1          | 515.2936712 | 1.428577768 | 0.27085299  | 5.274365876 | 1.33E-07       | 6.03E-07    |
| Bola1         | 248.7227922 | 1.428467477 | 0.171608977 | 8.323967076 | 8.51E-17       | 1.03E-15    |
| Dpm3          | 279.3434697 | 1.428183514 | 0.198460222 | 7.196321271 | 6.19E-13       | 5.18E-12    |
| Olfr635       | 50.9050092  | 1.427406964 | 0.350220761 | 4.075734865 | 4.59E-05       | 0.000146301 |
| Edf1          | 2692.784979 | 1.427164705 | 0.157724162 | 9.048484929 | 1.45E-19       | 2.22E-18    |
| Gm10767       | 11.86840958 | 1.42686514  | 0.565311465 | 2.524033612 | 0.011601684    | 0.023201529 |
| Vmn1r169      | 3.855602325 | 1.426342469 | 1.147813858 | 1.242660088 | 0.213993118    | 0.293574675 |
| Olfr907       | 3.014237224 | 1.426089936 | 1.138080342 | 1.253066135 | 0.210181639    | 0.289105743 |
| Olfr740       | 13.7204073  | 1.425745966 | 0.493633317 | 2.888269322 | 0.00387368     | 0.008627425 |
| Zmat1         | 91.03557777 | 1.425296583 | 0.370732974 | 3.844536857 | 0.00012078     | 0.000359561 |
| Tgm5          | 0.311485898 | 1.425213041 | 3.646437519 | 0.390850805 | 0.695907519 NA |             |
| Cebpa         | 5362.454659 | 1.424906425 | 0.237946238 | 5.988354503 | 2.12E-09       | 1.18E-08    |
| Olfr448       | 0.628562064 | 1.424655251 | 2.479779161 | 0.574508921 | 0.565623465 NA |             |

|               |             |             |             |             |                |             |
|---------------|-------------|-------------|-------------|-------------|----------------|-------------|
| Sds           | 2999.782667 | 1.424604349 | 0.366244831 | 3.889759607 | 0.000100344    | 0.000303254 |
| Gm9118        | 0.459903715 | 1.424444482 | 3.056081863 | 0.466101546 | 0.641142816 NA |             |
| Obscn         | 1.588728323 | 1.424406197 | 1.636213876 | 0.870550126 | 0.383999838 NA |             |
| Mapre3        | 791.7648786 | 1.424209953 | 0.238125551 | 5.980920335 | 2.22E-09       | 1.24E-08    |
| Khdc1a        | 0.460538483 | 1.423846878 | 3.055335319 | 0.466019841 | 0.641201299 NA |             |
| Olfr1336      | 42.04249586 | 1.423114389 | 0.365933778 | 3.888994337 | 0.00010066     | 0.00030405  |
| Uqrc2         | 3265.193313 | 1.422824343 | 0.126221946 | 11.27240063 | 1.80E-29       | 6.04E-28    |
| Gm38428       | 0.630828836 | 1.422351845 | 2.875370129 | 0.494667393 | 0.620834922 NA |             |
| Olfr667       | 7.08758727  | 1.422183146 | 0.662610423 | 2.146333798 | 0.031846357    | 0.056808276 |
| Whamm         | 978.0647808 | 1.421752239 | 0.185480155 | 7.665252587 | 1.78E-14       | 1.73E-13    |
| Slc25a18      | 1.972012655 | 1.421683897 | 1.63090103  | 0.871716843 | 0.38336287     | 0.475521697 |
| Nudt6         | 134.1191766 | 1.421416006 | 0.230120577 | 6.176831411 | 6.54E-10       | 3.88E-09    |
| Tmem8         | 342.1162117 | 1.420633189 | 0.237407756 | 5.983937556 | 2.18E-09       | 1.22E-08    |
| Cyp2j9        | 330.6445041 | 1.420607235 | 0.325463096 | 4.364879623 | 1.27E-05       | 4.41E-05    |
| Lhfp15        | 0.658899883 | 1.420341916 | 2.85024094  | 0.498323456 | 0.618256078 NA |             |
| Prss43        | 0.468689276 | 1.420061097 | 3.038444177 | 0.467364551 | 0.640239081 NA |             |
| H2-K2         | 144.5121172 | 1.420009612 | 0.306798609 | 4.628474736 | 3.68E-06       | 1.38E-05    |
| Mthfd1        | 3587.656371 | 1.419645519 | 0.248704761 | 5.708155771 | 1.14E-08       | 5.87E-08    |
| Cyc1          | 3087.693199 | 1.41880143  | 0.141077187 | 10.05691609 | 8.56E-24       | 1.83E-22    |
| Nyap2         | 2.655536493 | 1.418721411 | 1.152139409 | 1.231379987 | 0.218180778    | 0.298614797 |
| H3c2          | 4.841956983 | 1.418715418 | 1.435970315 | 0.987983807 | 0.323160579    | 0.414446818 |
| Gm2962        | 1.028073985 | 1.418352301 | 1.742739488 | 0.813863638 | 0.415723073 NA |             |
| Homer1        | 128.3266804 | 1.418260531 | 0.238554907 | 5.945216327 | 2.76E-09       | 1.52E-08    |
| Aldh7a1       | 7242.903267 | 1.417860559 | 0.203348927 | 6.972549981 | 3.11E-12       | 2.40E-11    |
| Pipox         | 4917.073731 | 1.417731452 | 0.146530991 | 9.675301034 | 3.84E-22       | 7.23E-21    |
| 1810055G02Rik | 430.1568799 | 1.417513332 | 0.50119711  | 2.828255197 | 0.004680248    | 0.010240185 |
| Gm26509       | 0.643405671 | 1.417478258 | 2.864056313 | 0.494919828 | 0.620656714 NA |             |
| Lrfrn5        | 0.724798672 | 1.417441447 | 2.740293125 | 0.51725906  | 0.604975329 NA |             |
| Mfn2          | 1016.248329 | 1.41740571  | 0.223939004 | 6.329427576 | 2.46E-10       | 1.54E-09    |
| Trpm5         | 0.45830873  | 1.416626975 | 3.059107113 | 0.463085117 | 0.643303358 NA |             |
| Ndufs1        | 1729.500918 | 1.415694269 | 0.139954108 | 10.11541776 | 4.72E-24       | 1.03E-22    |
| Mdga2         | 37.6099617  | 1.415175432 | 0.349837113 | 4.045241    | 5.23E-05       | 0.000164986 |
| Trib1         | 1403.92631  | 1.414798763 | 0.22596733  | 6.2610766   | 3.82E-10       | 2.33E-09    |
| Pnp1a8        | 1496.539253 | 1.414700428 | 0.17625471  | 8.026454613 | 1.00E-15       | 1.10E-14    |
| Slc26a3       | 10.01596229 | 1.413765537 | 0.581505201 | 2.431217354 | 0.015048184    | 0.029185602 |
| Rspo3         | 43.78803967 | 1.413735462 | 0.409200889 | 3.454868988 | 0.00055056     | 0.001460394 |
| Faah          | 2481.253554 | 1.413587241 | 0.15294296  | 9.242578031 | 2.41E-20       | 3.96E-19    |
| Pcbd1         | 3461.323182 | 1.413293523 | 0.228382675 | 6.188269409 | 6.08E-10       | 3.63E-09    |
| Ano2          | 0.711401039 | 1.412934685 | 2.297759904 | 0.614918331 | 0.538608657 NA |             |
| Slc16a4       | 0.690003599 | 1.412085281 | 2.767998644 | 0.510146667 | 0.609948713 NA |             |
| Ftcd          | 9068.193904 | 1.411996194 | 0.240963472 | 5.859793518 | 4.63E-09       | 2.49E-08    |
| Dgat2         | 4672.588184 | 1.411681541 | 0.193832342 | 7.283003079 | 3.26E-13       | 2.80E-12    |
| Ccni2         | 3267.87839  | 1.411581149 | 0.150609898 | 9.372432814 | 7.09E-21       | 1.21E-19    |
| Ctcf1         | 8.860022573 | 1.410757941 | 0.664803545 | 2.122067417 | 0.033832077    | 0.059812221 |
| Olfr420       | 1.355225942 | 1.409903925 | 1.52179019  | 0.926477207 | 0.354198037 NA |             |
| Dgat2l6       | 1.022941535 | 1.409808646 | 2.254412962 | 0.625355101 | 0.531738023 NA |             |
| Adgrv1        | 75.59922145 | 1.40957119  | 0.439783912 | 3.205144962 | 0.001349945    | 0.003318987 |
| Sv2c          | 6.651655469 | 1.40806361  | 1.03200062  | 1.364401903 | 0.172441109    | 0.244858907 |
| Flacc1        | 3.342065061 | 1.407795243 | 1.226788856 | 1.147544857 | 0.251156505    | 0.335662911 |
| Mrpl14        | 686.8992866 | 1.407139717 | 0.161377579 | 8.719549071 | 2.79E-18       | 3.86E-17    |
| Dipk1a        | 120.525462  | 1.406789338 | 0.305035573 | 4.61188616  | 3.99E-06       | 1.49E-05    |
| Pparg         | 147.0899487 | 1.406645361 | 0.277766966 | 5.064120411 | 4.10E-07       | 1.74E-06    |
| Acat3         | 5535.995085 | 1.406553334 | 0.242592785 | 5.798001524 | 6.71E-09       | 3.54E-08    |
| Ambp          | 36407.38845 | 1.406284643 | 0.141799936 | 9.917385581 | 3.50E-23       | 7.12E-22    |
| Abhd15        | 210.6126649 | 1.406044906 | 0.474175231 | 2.965243257 | 0.003024437    | 0.006891285 |
| Zfp979        | 22.01051621 | 1.405240841 | 0.61961442  | 2.267927918 | 0.0233336      | 0.043158427 |
| Adcy8         | 3.649613801 | 1.405051541 | 0.922097801 | 1.52375544  | 0.127569815    | 0.189890002 |
| Lamtor2       | 744.8491948 | 1.404965327 | 0.222932054 | 6.302213158 | 2.93E-10       | 1.82E-09    |
| Plg           | 33041.23979 | 1.404648918 | 0.246907311 | 5.688972551 | 1.28E-08       | 6.53E-08    |
| Olfr1192-ps1  | 22.26220917 | 1.404498418 | 0.449003047 | 3.128037609 | 0.001759777    | 0.004211803 |
| Ndufa3        | 1180.484879 | 1.404016519 | 0.184541623 | 7.608129238 | 2.78E-14       | 2.66E-13    |
| Bag4          | 327.4072707 | 1.404009355 | 0.172263874 | 8.150341208 | 3.63E-16       | 4.14E-15    |
| Olfr898       | 9.423112505 | 1.403290516 | 0.654951068 | 2.142588333 | 0.032146169    | 0.057259209 |
| Gm14654       | 17.95277349 | 1.402496091 | 0.497057634 | 2.821596524 | 0.004778525    | 0.010424095 |
| 1700020L24Rik | 0.73293317  | 1.400539496 | 2.058471438 | 0.680378396 | 0.496264896 NA |             |
| Selenop       | 64167.0072  | 1.400056045 | 0.202280881 | 6.921346387 | 4.47E-12       | 3.41E-11    |



|            |             |             |             |             |                |             |
|------------|-------------|-------------|-------------|-------------|----------------|-------------|
| Cyp4f14    | 2968.742936 | 1.398166349 | 0.436048238 | 3.206448797 | 0.001343842    | 0.003304937 |
| Phf11c     | 154.4136303 | 1.39728768  | 0.352050518 | 3.968997649 | 7.22E-05       | 0.000223272 |
| Tmem266    | 18.12946173 | 1.396117816 | 0.467188974 | 2.988336398 | 0.002805006    | 0.006434304 |
| Gm7765     | 1.276219259 | 1.394938762 | 2.127236562 | 0.655751592 | 0.51983968 NA  |             |
| Olfr1034   | 52.99984519 | 1.394063767 | 0.379711806 | 3.671373252 | 0.000241251    | 0.000682856 |
| Zfp971     | 59.11822952 | 1.392000946 | 0.326723162 | 4.260490559 | 2.04E-05       | 6.87E-05    |
| Ndufa9     | 1725.636686 | 1.391778532 | 0.157927933 | 8.812744574 | 1.22E-18       | 1.75E-17    |
| Ndufab1    | 1622.769615 | 1.391120536 | 0.190386702 | 7.306815667 | 2.74E-13       | 2.37E-12    |
| Chrd1      | 3.752185075 | 1.390694805 | 1.611239136 | 0.863121292 | 0.388070782    | 0.480417595 |
| Gpd2       | 311.2347394 | 1.389719511 | 0.193238351 | 7.191737573 | 6.40E-13       | 5.35E-12    |
| Slc30a8    | 1.585555918 | 1.389683745 | 1.672606391 | 0.830849237 | 0.406058803 NA |             |
| Mrp1       | 414.8337147 | 1.389427837 | 0.175438836 | 7.919727845 | 2.38E-15       | 2.51E-14    |
| Nt5dc1     | 230.1840497 | 1.387898195 | 0.205624177 | 6.749683897 | 1.48E-11       | 1.06E-10    |
| Gm12182    | 0.885655682 | 1.387826036 | 2.281707145 | 0.608240211 | 0.543028169 NA |             |
| Gm7208     | 34.27821931 | 1.387697827 | 0.735123851 | 1.887706168 | 0.059065408    | 0.0974685   |
| Nr1h4      | 1942.56821  | 1.387445601 | 0.337838305 | 4.106833304 | 4.01E-05       | 0.000129049 |
| Olfr804    | 18.91791494 | 1.387292609 | 0.556581695 | 2.492522878 | 0.012683916    | 0.025079494 |
| Peli2      | 231.7075651 | 1.387277154 | 0.209288594 | 6.62853682  | 3.39E-11       | 2.33E-10    |
| Amigo1     | 118.5576936 | 1.38727362  | 0.419360227 | 3.308071512 | 0.000939408    | 0.002383544 |
| Cox5a      | 2257.680373 | 1.386774874 | 0.175041086 | 7.922567821 | 2.33E-15       | 2.46E-14    |
| Lypla1     | 1947.663188 | 1.385555748 | 0.19540237  | 7.090782726 | 1.33E-12       | 1.08E-11    |
| Eme2       | 280.9499581 | 1.385008965 | 0.263935472 | 5.247528695 | 1.54E-07       | 6.93E-07    |
| Nat9       | 386.4188443 | 1.38492454  | 0.21311641  | 6.498441578 | 8.12E-11       | 5.36E-10    |
| Gm42718    | 6.563526196 | 1.384890456 | 0.968143309 | 1.430460184 | 0.152584985    | 0.220989621 |
| Gm10288    | 436.9597687 | 1.383028583 | 0.287602181 | 4.808825082 | 1.52E-06       | 5.96E-06    |
| Gm9392     | 0.850171708 | 1.382379951 | 2.227039629 | 0.620725349 | 0.534780348 NA |             |
| BC024978   | 242.3665802 | 1.38194275  | 0.242277093 | 5.703976103 | 1.17E-08       | 6.02E-08    |
| Foxa1      | 390.5079405 | 1.38038934  | 0.284844843 | 4.846109645 | 1.26E-06       | 5.01E-06    |
| Mesp2      | 3.669563018 | 1.380318503 | 1.042017159 | 1.32466005  | 0.185283929    | 0.260323694 |
| Zfhx2      | 307.9426741 | 1.379053572 | 0.247601262 | 5.569654848 | 2.55E-08       | 1.26E-07    |
| Gm8281     | 0.426087045 | 1.378493465 | 3.595470733 | 0.383397215 | 0.701425268 NA |             |
| Gm47355    | 15.26881234 | 1.376890437 | 0.752473521 | 1.829819122 | 0.06727699     | 0.109283598 |
| Tmem100    | 6.812723394 | 1.376506092 | 0.840562609 | 1.637600907 | 0.101504974    | 0.156291256 |
| Ndufb4     | 349.7015416 | 1.375663413 | 0.265970705 | 5.172236589 | 2.31E-07       | 1.02E-06    |
| Cox8a      | 3163.710752 | 1.375146662 | 0.122503344 | 11.22538057 | 3.06E-29       | 9.96E-28    |
| Lrr1q3     | 26.11323565 | 1.375086456 | 0.408941052 | 3.36255421  | 0.00077225     | 0.001989319 |
| Vmn1r74    | 8.877262125 | 1.374238929 | 0.638128064 | 2.153547237 | 0.031275696    | 0.05587802  |
| Mecr       | 390.552685  | 1.372741277 | 0.189093415 | 7.259593239 | 3.88E-13       | 3.31E-12    |
| Clec3b     | 4.506176586 | 1.372731958 | 0.95854401  | 1.432101128 | 0.152114882    | 0.220439859 |
| Adssl1     | 253.2128467 | 1.372184126 | 0.287022429 | 4.780755746 | 1.75E-06       | 6.81E-06    |
| Gadd45g    | 399.9232077 | 1.371931249 | 0.418742728 | 3.276310622 | 0.001051728    | 0.002638685 |
| Sgf29      | 268.4488975 | 1.371374041 | 0.234571902 | 5.846284345 | 5.03E-09       | 2.69E-08    |
| Gm11512    | 0.831545977 | 1.371261187 | 1.996062178 | 0.686983202 | 0.492093314 NA |             |
| Ubc        | 19766.81398 | 1.371218576 | 0.175587587 | 7.809313844 | 5.75E-15       | 5.85E-14    |
| Letm1      | 1037.210244 | 1.371176304 | 0.135856113 | 10.09285689 | 5.94E-24       | 1.29E-22    |
| Them4      | 286.5489132 | 1.371096081 | 0.198490627 | 6.907611219 | 4.93E-12       | 3.74E-11    |
| Gm13245    | 1.756465777 | 1.370787343 | 1.459852086 | 0.938990571 | 0.347735586    | 0.440234388 |
| Mmut       | 1860.707501 | 1.369317347 | 0.157486454 | 8.694826188 | 3.47E-18       | 4.76E-17    |
| Mocs2      | 1563.482075 | 1.368952036 | 0.202801464 | 6.750207864 | 1.48E-11       | 1.06E-10    |
| Pccb       | 1772.446925 | 1.367951992 | 0.145952787 | 9.372565034 | 7.08E-21       | 1.21E-19    |
| Scn3a      | 7.372170392 | 1.367643339 | 1.118797548 | 1.222422538 | 0.22154788     | 0.30239778  |
| Gm48360    | 0.738483776 | 1.367545997 | 2.726588129 | 0.501559433 | 0.615977461 NA |             |
| Nrp1       | 750.8712999 | 1.36662803  | 0.243864115 | 5.604055471 | 2.09E-08       | 1.04E-07    |
| Col27a1    | 1527.937006 | 1.366094623 | 0.369538397 | 3.696759618 | 0.000218369    | 0.000623159 |
| Zfp655     | 512.3205167 | 1.365909307 | 0.156655651 | 8.719183103 | 2.80E-18       | 3.87E-17    |
| Dbt        | 1135.962213 | 1.365558282 | 0.149783637 | 9.116872223 | 7.73E-20       | 1.21E-18    |
| CT868723.1 | 1.731398579 | 1.365525619 | 1.442393674 | 0.946707992 | 0.343787597    | 0.436110645 |
| Gm2260     | 17.35594126 | 1.365522069 | 1.243940152 | 1.097739362 | 0.272318316    | 0.358991854 |
| Gadd45gip1 | 744.5326535 | 1.365197615 | 0.141946425 | 9.617696358 | 6.73E-22       | 1.25E-20    |
| Gm21244    | 44.37796843 | 1.365046542 | 0.385816914 | 3.538068166 | 0.000403066    | 0.001095404 |
| Gm28557    | 49.8776066  | 1.364264378 | 0.389754977 | 3.500312905 | 0.000464712    | 0.001248411 |
| Mtfr1l     | 989.8016544 | 1.364113477 | 0.183347962 | 7.440025289 | 1.01E-13       | 9.11E-13    |
| Aldh1a1    | 20803.87231 | 1.364066015 | 0.199016814 | 6.854023982 | 7.18E-12       | 5.34E-11    |
| Smim41     | 1.730683265 | 1.363390119 | 1.719854067 | 0.792735933 | 0.42793169     | 0.519910166 |
| Gm11258    | 0.903203349 | 1.362812817 | 2.034959337 | 0.66970027  | 0.50304888 NA  |             |
| Abcb10     | 512.2728221 | 1.361451072 | 0.146972105 | 9.263329752 | 1.98E-20       | 3.28E-19    |

|               |             |             |             |             |                |             |          |
|---------------|-------------|-------------|-------------|-------------|----------------|-------------|----------|
| Pltp          | 555.7958885 | 1.3613957   | 0.332820735 | 4.090477415 | 4.30E-05       | 0.000137872 |          |
| Mrpl32        | 364.5876142 | 1.361207522 | 0.176927754 | 7.693578249 | 1.43E-14       | 1.40E-13    |          |
| Sat2          | 188.8164746 | 1.360744719 | 0.262747218 | 5.178911994 | 2.23E-07       | 9.83E-07    |          |
| Tmed5         | 1110.845195 | 1.360594152 | 0.19386616  | 7.018213765 | 2.25E-12       | 1.77E-11    |          |
| Pyurf         | 528.2909898 | 1.359659011 | 0.201392407 | 6.751292339 | 1.47E-11       | 1.05E-10    |          |
| Nmbr          | 0.423767838 | 1.359273665 | 3.64604953  | 0.372807241 | 0.709291913 NA |             |          |
| Gm13305       | 6.633723858 | 1.358992708 | 0.864989257 | 1.571109348 | 0.116157252    | 0.175616249 |          |
| Slco1a4       | 797.443498  | 1.358859694 | 0.332898666 | 4.081901891 | 4.47E-05       | 0.000142659 |          |
| Pex14         | 745.0052765 | 1.358706475 | 0.202459647 | 6.710998952 | 1.93E-11       | 1.37E-10    |          |
| Olfr545       | 3.662294187 | 1.358688355 | 0.913021942 | 1.488122347 | 0.136718631    | 0.201241515 |          |
| Olfr283       | 0.266445202 | 1.358537271 | 3.621986081 | 0.375080754 | 0.70760041 NA  |             |          |
| Ugp2          | 4602.774088 | 1.358452125 | 0.237117375 | 5.729028183 | 1.01E-08       | 5.24E-08    |          |
| Gm29689       | 6.78454835  | 1.358038042 | 0.824263722 | 1.647577111 | 0.099439481    | 0.153638233 |          |
| Cyb5d2        | 177.7490053 | 1.357959031 | 0.246764032 | 5.503067112 | 3.73E-08       | 1.80E-07    |          |
| Vmn2r1        | 0.831581185 | 1.357872737 | 1.995788538 | 0.680369043 | 0.496270818 NA |             |          |
| Hint3         | 279.8703528 | 1.35780178  | 0.193528431 | 7.016032596 | 2.28E-12       | 1.80E-11    |          |
| H2bc15        | 0.592788902 | 1.35758182  | 2.458606119 | 0.552175401 | 0.580828186 NA |             |          |
| Rpl28-ps2     | 1.789378235 | 1.357530134 | 1.295895499 | 1.047561424 | 0.294840718    | 0.384137911 |          |
| Zfp985        | 1.023689172 | 1.357270259 | 2.611116804 | 0.519804498 | 0.603199844 NA |             |          |
| Ankrd33b      | 367.8065013 | 1.357111439 | 0.327568839 | 4.142980884 | 3.43E-05       | 0.000111556 |          |
| Fam151b       | 57.03716222 | 1.357053599 | 0.318664435 | 4.25856622  | 2.06E-05       | 6.92E-05    |          |
| Tpbg1         | 36.00907042 | 1.355498546 | 0.543820519 | 2.492547629 | 0.012683032    | 0.025079494 |          |
| Aurkaip1      | 848.6554708 | 1.355050241 | 0.15912607  | 8.515576619 | 1.66E-17       | 2.15E-16    |          |
| Pex7          | 859.8062706 | 1.355006664 | 0.165851824 | 8.169983486 | 3.08E-16       | 3.54E-15    |          |
| Fcgrt         | 1867.454897 | 1.354803587 | 0.166599353 | 8.13210592  | 4.22E-16       | 4.79E-15    |          |
| Higd2a        | 1033.591015 | 1.354783912 | 0.145713305 | 9.297599211 | 1.44E-20       | 2.39E-19    |          |
| Gm17450       | 0.591605747 | 1.353847544 | 2.459643535 | 0.550424289 | 0.582028393 NA |             |          |
| Epb42         | 3.814376339 | 1.353343165 | 0.94639339  | 1.430000652 | 0.152716832    | 0.221143001 |          |
| Rexo2         | 1193.031203 | 1.353089112 | 0.230953084 | 5.85871853  | 4.66E-09       | 2.51E-08    |          |
| 1190007107Rik | 138.0571383 | 1.352630784 | 0.196100065 | 6.897655977 | 5.29E-12       | 4.00E-11    |          |
| Aptx          | 172.9767652 | 1.352410311 | 0.244160478 | 5.539022215 | 3.04E-08       | 1.48E-07    |          |
| Ndufs4        | 980.5929895 | 1.352319855 | 0.223767766 | 6.043407777 | 1.51E-09       | 8.59E-09    |          |
| Olfr918       | 3.786648852 | 1.351228132 | 1.031890558 | 1.309468452 | 0.190375718    | 0.266157556 |          |
| Ndufs3        | 1984.958058 | 1.351005903 | 0.159824875 | 8.453039011 | 2.84E-17       | 3.60E-16    |          |
| ldh3a         | 551.4320426 | 1.350770745 | 0.191534587 | 7.052359383 | 1.76E-12       | 1.40E-11    |          |
| Gm48130       | 1.489535388 | 1.350190336 | 1.628880154 | 0.828907107 | 0.407156974 NA |             |          |
| Acsf3         | 444.8053384 | 1.350023662 | 0.188103047 | 7.177043036 | 7.12E-13       | 5.94E-12    |          |
| Olfr51        | 3.150302168 | 1.349869627 | 1.110837641 | 1.215181749 | 0.22429678     | 0.305660392 |          |
| Glrb          | 5.948721722 | 1.349342014 | 1.062175115 | 1.270357397 | 0.203957351    | 0.282023273 |          |
| Arl14epl      | 2.704645919 | 1.347812647 | 1.034348971 | 1.303054081 | 0.192556299    | 0.268677344 |          |
|               | 2-Mar       | 5961.167139 | 1.347603082 | 0.209671046 | 6.427225457    | 1.30E-10    | 8.38E-10 |
| Pp2d1         | 0.86895292  | 1.347483441 | 1.963610498 | 0.686227458 | 0.492569685 NA |             |          |
| Mctp2         | 215.4749592 | 1.347225231 | 0.198020494 | 6.803463629 | 1.02E-11       | 7.49E-11    |          |
| Upk1b         | 3.809793159 | 1.346747316 | 1.057705818 | 1.273272107 | 0.202921501    | 0.280795921 |          |
| ldnk          | 447.7792805 | 1.346567367 | 0.223143797 | 6.034527442 | 1.59E-09       | 9.04E-09    |          |
| Pink1         | 2336.857638 | 1.346534857 | 0.127977154 | 10.52168151 | 6.86E-26       | 1.73E-24    |          |
| lqch          | 3.479739518 | 1.346407944 | 0.945619788 | 1.423836474 | 0.154493815    | 0.223383992 |          |
| Tmem254a      | 240.9100949 | 1.344117006 | 0.320646567 | 4.191895828 | 2.77E-05       | 9.11E-05    |          |
| Gm47611       | 34.20065908 | 1.343902427 | 0.327898854 | 4.098527374 | 4.16E-05       | 0.00013349  |          |
| Stard5        | 1585.829811 | 1.343738313 | 0.276463713 | 4.860450936 | 1.17E-06       | 4.69E-06    |          |
| Rnf103        | 1317.474738 | 1.343247273 | 0.13494766  | 9.953838928 | 2.43E-23       | 5.02E-22    |          |
| Pm20d1        | 1231.210154 | 1.343189758 | 0.365913662 | 3.670783295 | 0.000241808    | 0.000684207 |          |
| Ccdc62        | 83.43277466 | 1.343048214 | 0.386193721 | 3.477654193 | 0.000505822    | 0.001350126 |          |
| Mast3         | 748.9833785 | 1.34288845  | 0.226949589 | 5.917122188 | 3.28E-09       | 1.80E-08    |          |
| Inhbe         | 637.9828144 | 1.342478897 | 0.340443538 | 3.943323184 | 8.04E-05       | 0.000247066 |          |
| Nxt2          | 341.8019805 | 1.342116542 | 0.249648304 | 5.376029077 | 7.61E-08       | 3.55E-07    |          |
| Ppargc1b      | 63.42943767 | 1.342059937 | 0.449007286 | 2.988949127 | 0.002799387    | 0.006422279 |          |
| Olfr1321      | 24.55016297 | 1.340564012 | 0.392278791 | 3.41737571  | 0.00063228     | 0.001658834 |          |
| Gm4791        | 2.416674691 | 1.340257029 | 1.167392512 | 1.148077459 | 0.250936589    | 0.335395293 |          |
| Actl9         | 3.604493889 | 1.339860184 | 1.060474297 | 1.263453709 | 0.206426173    | 0.284951692 |          |
| Gckr          | 4065.540524 | 1.339697004 | 0.282066827 | 4.749573064 | 2.04E-06       | 7.87E-06    |          |
| Fpgs          | 2633.41908  | 1.339492005 | 0.288378706 | 4.644906079 | 3.40E-06       | 1.28E-05    |          |
| Prdm9         | 127.8075099 | 1.338952075 | 0.363792861 | 3.680534218 | 0.000232746    | 0.000660318 |          |
| Ribc1         | 29.29243875 | 1.338744806 | 0.464844291 | 2.879985475 | 0.003976935    | 0.008833718 |          |
| Prdx5         | 4564.140525 | 1.338583205 | 0.157789178 | 8.483365107 | 2.19E-17       | 2.81E-16    |          |
| Mrpl47        | 229.896092  | 1.338459637 | 0.220101047 | 6.08111437  | 1.19E-09       | 6.89E-09    |          |

|               |             |             |             |             |                |             |
|---------------|-------------|-------------|-------------|-------------|----------------|-------------|
| Sgpp1         | 977.3218139 | 1.336300431 | 0.201819901 | 6.621252026 | 3.56E-11       | 2.44E-10    |
| Mblac2        | 157.1895101 | 1.335868122 | 0.228766817 | 5.839431335 | 5.24E-09       | 2.80E-08    |
| Zfp708        | 54.48502578 | 1.335068011 | 0.299420576 | 4.458838556 | 8.24E-06       | 2.94E-05    |
| Tlx2          | 0.893350508 | 1.334924413 | 2.670692983 | 0.499841959 | 0.617186363 NA |             |
| Ap3m1         | 1324.338169 | 1.334440246 | 0.249782283 | 5.342413523 | 9.17E-08       | 4.23E-07    |
| Olfr1313      | 0.599966431 | 1.334308165 | 2.449172846 | 0.54479951  | 0.585891416 NA |             |
| Cacna1e       | 19.93690054 | 1.333963649 | 0.553986183 | 2.407936677 | 0.016042963    | 0.03092353  |
| Rdh11         | 986.9118677 | 1.333403101 | 0.254304086 | 5.243341227 | 1.58E-07       | 7.09E-07    |
| Gm19098       | 0.606134908 | 1.333155947 | 2.441059659 | 0.546138207 | 0.584970938 NA |             |
| Hmgn5         | 581.5568499 | 1.332975569 | 0.195099705 | 6.832278746 | 8.36E-12       | 6.18E-11    |
| Olfr690       | 0.606114899 | 1.332922675 | 2.441084636 | 0.546037059 | 0.585040463 NA |             |
| Kctd15        | 229.96826   | 1.332737528 | 0.856564976 | 1.555909434 | 0.11972963     | 0.180027406 |
| ldh3b         | 2718.647556 | 1.331734295 | 0.125327649 | 10.62602148 | 2.26E-26       | 5.87E-25    |
| Rsrp1         | 8856.557606 | 1.331694468 | 0.251185967 | 5.301627649 | 1.15E-07       | 5.24E-07    |
| Gm29127       | 0.437530722 | 1.331229665 | 3.163535801 | 0.420804362 | 0.673897946 NA |             |
| Car15         | 15.10194865 | 1.331178989 | 0.567714577 | 2.344803257 | 0.019037122    | 0.035972607 |
| Mrm3          | 126.6242203 | 1.331085879 | 0.203122059 | 6.553133064 | 5.63E-11       | 3.80E-10    |
| Hacd2         | 1080.060447 | 1.330777221 | 0.21089093  | 6.310262932 | 2.79E-10       | 1.73E-09    |
| Apoh          | 24858.85389 | 1.330583954 | 0.196458279 | 6.772857638 | 1.26E-11       | 9.14E-11    |
| Vmn1r185      | 1.801898705 | 1.33019234  | 1.231747031 | 1.079923318 | 0.280176329    | 0.367701775 |
| Rsad1         | 366.8735502 | 1.330036463 | 0.316077772 | 4.207940511 | 2.58E-05       | 8.54E-05    |
| Sec63         | 2710.663129 | 1.329721448 | 0.167706872 | 7.928842919 | 2.21E-15       | 2.35E-14    |
| Pxmp4         | 1838.0243   | 1.328629636 | 0.287688579 | 4.618291204 | 3.87E-06       | 1.45E-05    |
| Tafa2         | 1.583502185 | 1.328398867 | 1.523572771 | 0.871897222 | 0.383264449 NA |             |
| Gm3379        | 2.29211568  | 1.32833315  | 1.141804403 | 1.163363135 | 0.2446822      | 0.328374569 |
| Afg1l         | 157.4631371 | 1.328115487 | 0.17899158  | 7.419988608 | 1.17E-13       | 1.05E-12    |
| Trap1         | 2435.395136 | 1.328019997 | 0.203278512 | 6.533007266 | 6.45E-11       | 4.32E-10    |
| Gbe1          | 828.6603388 | 1.327351728 | 0.310462919 | 4.27539537  | 1.91E-05       | 6.45E-05    |
| Zfp612        | 186.5739345 | 1.326319323 | 0.283171113 | 4.683808694 | 2.82E-06       | 1.07E-05    |
| Gm6754        | 0.437326454 | 1.325758534 | 3.601131462 | 0.368150552 | 0.712760979 NA |             |
| Rnf43         | 297.6096389 | 1.325479665 | 0.313784717 | 4.224168969 | 2.40E-05       | 7.99E-05    |
| Ndufa12       | 996.8274148 | 1.325271841 | 0.156723249 | 8.456127925 | 2.76E-17       | 3.52E-16    |
| Rfxank        | 341.1605026 | 1.324855344 | 0.277869485 | 4.767905142 | 1.86E-06       | 7.23E-06    |
| Gm2546        | 0.437226824 | 1.324747808 | 3.601148101 | 0.367868183 | 0.712971526 NA |             |
| Vpreb3        | 2.257829538 | 1.323860161 | 1.357529141 | 0.975198339 | 0.329461887    | 0.421450157 |
| Esrb          | 6.985540779 | 1.323750057 | 0.765540823 | 1.729169782 | 0.083778713    | 0.132590002 |
| Zfand2b       | 388.748639  | 1.32259089  | 0.23122542  | 5.719919945 | 1.07E-08       | 5.51E-08    |
| Olfr447       | 0.847788767 | 1.322372485 | 1.98324738  | 0.666771326 | 0.504918211 NA |             |
| Aspa          | 133.981345  | 1.322328625 | 0.345522557 | 3.827039938 | 0.000129693    | 0.000384257 |
| Stoml2        | 724.7698453 | 1.322008191 | 0.234883181 | 5.628364631 | 1.82E-08       | 9.13E-08    |
| S100a13       | 274.1277721 | 1.321986884 | 0.2040052   | 6.480162691 | 9.16E-11       | 6.02E-10    |
| Txnl4b        | 187.0780738 | 1.321695431 | 0.204356599 | 6.467593585 | 9.96E-11       | 6.51E-10    |
| Dbi           | 13424.30333 | 1.320916176 | 0.226632725 | 5.828444145 | 5.59E-09       | 2.98E-08    |
| Meig1         | 7.151904002 | 1.320617865 | 0.834860429 | 1.581842689 | 0.113685487    | 0.172383722 |
| Glyctk        | 2714.62151  | 1.32001316  | 0.242030089 | 5.453921712 | 4.93E-08       | 2.34E-07    |
| Fkbp2         | 1130.535937 | 1.319821306 | 0.15710814  | 8.400718795 | 4.44E-17       | 5.53E-16    |
| Gp2           | 0.436739509 | 1.319780106 | 3.601229969 | 0.366480374 | 0.714006655 NA |             |
| Unc79         | 5.330626801 | 1.319395802 | 0.938795673 | 1.405413169 | 0.159898453    | 0.229708336 |
| Cxcr5         | 3.798758241 | 1.319319881 | 0.953728465 | 1.38332862  | 0.166564126    | 0.237681864 |
| Camk2n1       | 1225.916246 | 1.318911612 | 0.170415747 | 7.739376404 | 9.99E-15       | 9.95E-14    |
| Wdr49         | 1.988571048 | 1.31753076  | 1.31962124  | 0.998415848 | 0.318077752    | 0.40953021  |
| Timm8b        | 565.847429  | 1.317247425 | 0.163226272 | 8.070069911 | 7.03E-16       | 7.81E-15    |
| Prkaa2        | 735.8997734 | 1.316974329 | 0.209248795 | 6.293820367 | 3.10E-10       | 1.91E-09    |
| Hbb-bs        | 1807.251486 | 1.316879935 | 0.469101667 | 2.807237806 | 0.004996834    | 0.010867429 |
| Psmb5         | 1557.889363 | 1.316689413 | 0.12938843  | 10.17625313 | 2.53E-24       | 5.64E-23    |
| Msrb1         | 3860.879382 | 1.316423862 | 0.19006646  | 6.926123943 | 4.33E-12       | 3.30E-11    |
| Olfr160       | 3.734064344 | 1.316233292 | 1.068464491 | 1.231892406 | 0.217989279    | 0.29844854  |
| Cbx8          | 118.6673169 | 1.316116801 | 0.315033186 | 4.177708447 | 2.94E-05       | 9.67E-05    |
| 4430402118Rik | 25.87401891 | 1.315794439 | 0.635096545 | 2.071802229 | 0.038283889    | 0.066782332 |
| B2m           | 31332.41035 | 1.315549556 | 0.25606349  | 5.137591299 | 2.78E-07       | 1.21E-06    |
| Adi1          | 2376.351054 | 1.315040834 | 0.251570708 | 5.227320947 | 1.72E-07       | 7.71E-07    |
| Fahd1         | 824.6805009 | 1.315037041 | 0.270133114 | 4.868107509 | 1.13E-06       | 4.52E-06    |
| Gm8798        | 41.4691116  | 1.314999225 | 0.426141077 | 3.085830713 | 0.002029844    | 0.004792127 |
| Ccdc28a       | 265.3961133 | 1.314813046 | 0.315963142 | 4.161286152 | 3.16E-05       | 0.000103448 |
| Gm5415        | 0.437308309 | 1.313524501 | 3.163924331 | 0.415156737 | 0.678027167 NA |             |
| Pfn4          | 10.64975086 | 1.313447429 | 0.605671964 | 2.168578881 | 0.03011467     | 0.053973391 |



|          |             |             |             |             |                |             |
|----------|-------------|-------------|-------------|-------------|----------------|-------------|
| Rpusd3   | 229.1496448 | 1.312788741 | 0.245040144 | 5.357443565 | 8.44E-08       | 3.91E-07    |
| ltga10   | 59.01390583 | 1.312772115 | 0.460786678 | 2.848980188 | 0.004385961    | 0.0096592   |
| Gm8566   | 0.933334131 | 1.31250964  | 2.03469646  | 0.645064099 | 0.518885648 NA |             |
| Mon1a    | 262.5417708 | 1.311771942 | 0.166081372 | 7.898368883 | 2.83E-15       | 2.96E-14    |
| Ttc30a2  | 3.366969353 | 1.311543511 | 1.533631033 | 0.855188427 | 0.392446842    | 0.484919458 |
| Gm9670   | 8.652264939 | 1.311377467 | 0.702372273 | 1.867068955 | 0.061891959    | 0.101552851 |
| Fbxo9    | 728.7333222 | 1.311119738 | 0.252294157 | 5.196789942 | 2.03E-07       | 9.01E-07    |
| Rex1bd   | 506.0786775 | 1.310899456 | 0.170426461 | 7.691877465 | 1.45E-14       | 1.42E-13    |
| Osbpl9   | 1769.857245 | 1.310341462 | 0.150625002 | 8.699362298 | 3.34E-18       | 4.58E-17    |
| Cutc     | 203.0576389 | 1.310287489 | 0.272160881 | 4.814385827 | 1.48E-06       | 5.82E-06    |
| Shld1    | 87.9296681  | 1.309415072 | 0.315449257 | 4.1509531   | 3.31E-05       | 0.000107884 |
| Vmn1r4   | 9.671844969 | 1.309280215 | 0.678306902 | 1.930218034 | 0.053579828    | 0.089551854 |
| Tmem267  | 184.8200249 | 1.308505572 | 0.381206746 | 3.432535193 | 0.000597966    | 0.001575113 |
| Clpp     | 871.2311121 | 1.30773776  | 0.168485645 | 7.761716219 | 8.38E-15       | 8.41E-14    |
| Paqr9    | 3088.092194 | 1.307736515 | 0.367173277 | 3.561633153 | 0.000368555    | 0.001009338 |
| Klf9     | 956.3779752 | 1.30737105  | 0.344695509 | 3.792828789 | 0.000148941    | 0.000437557 |
| Acp6     | 740.6711479 | 1.306582291 | 0.168952135 | 7.733446471 | 1.05E-14       | 1.04E-13    |
| Gm8034   | 0.930604043 | 1.305444153 | 2.035260802 | 0.641413696 | 0.521253937 NA |             |
| Rex2     | 4.911648861 | 1.305061552 | 1.722108352 | 0.757827781 | 0.448554089    | 0.539695822 |
| Fam228b  | 46.80753099 | 1.305012671 | 0.452555166 | 2.883654347 | 0.0039309      | 0.008740573 |
| Pdhh     | 1738.235605 | 1.304490479 | 0.151881908 | 8.588847076 | 8.78E-18       | 1.16E-16    |
| Olfr912  | 5.170133752 | 1.304059533 | 0.869676755 | 1.499476128 | 0.133750157    | 0.197605744 |
| H4c2     | 5.373905047 | 1.303395163 | 0.992697825 | 1.312982793 | 0.189188746    | 0.26475864  |
| Tet1     | 44.32380718 | 1.302467811 | 0.58827156  | 2.214058778 | 0.026824736    | 0.048777332 |
| Urad     | 279.4948097 | 1.301406737 | 0.422123545 | 3.082999638 | 0.002049254    | 0.00483405  |
| Cldn14   | 110.6965473 | 1.300801219 | 0.352263451 | 3.692694243 | 0.000221891    | 0.000632468 |
| Rnf123   | 1131.636783 | 1.300575227 | 0.17352789  | 7.494906015 | 6.63E-14       | 6.10E-13    |
| Mrps31   | 472.6294311 | 1.300148519 | 0.161130202 | 8.068931232 | 7.09E-16       | 7.88E-15    |
| Acat2    | 1266.959774 | 1.299857001 | 0.215508174 | 6.03159026  | 1.62E-09       | 9.20E-09    |
| Perp     | 1202.625324 | 1.29978898  | 0.1898811   | 6.845278327 | 7.63E-12       | 5.66E-11    |
| Vmn1r83  | 3.840307779 | 1.299783038 | 0.922261345 | 1.409343508 | 0.15873362     | 0.228265774 |
| Lrrn4    | 4.438074117 | 1.299083092 | 1.101652981 | 1.179212614 | 0.238313524    | 0.321676086 |
| Olfr466  | 3.06655331  | 1.298792095 | 1.058892641 | 1.226556919 | 0.21998917     | 0.300703605 |
| Slc13a4  | 9.062693603 | 1.298474916 | 0.858538757 | 1.512424344 | 0.130425946    | 0.193482555 |
| Tex2     | 2101.217373 | 1.298159659 | 0.216889691 | 5.985345138 | 2.16E-09       | 1.21E-08    |
| Vmn1r30  | 1.355945268 | 1.297861922 | 1.529066568 | 0.848793603 | 0.39599615 NA  |             |
| Olfr1387 | 1.147667228 | 1.297644611 | 1.833663438 | 0.707678729 | 0.47914479 NA  |             |
| Olfr775  | 6.147242445 | 1.296115401 | 0.726574627 | 1.783870993 | 0.07444463     | 0.119402771 |
| Rnaseh2c | 482.0238915 | 1.29593423  | 0.237772776 | 5.450305326 | 5.03E-08       | 2.39E-07    |
| Mtch2    | 2587.004749 | 1.295418138 | 0.132707706 | 9.761438681 | 1.65E-22       | 3.19E-21    |
| Ndufv2   | 1940.623216 | 1.294005452 | 0.177282817 | 7.299102495 | 2.90E-13       | 2.49E-12    |
| Prr16    | 312.4862464 | 1.292952539 | 0.205836201 | 6.281463271 | 3.35E-10       | 2.06E-09    |
| Chchd3   | 1442.624568 | 1.292887211 | 0.120537893 | 10.7259815  | 7.69E-27       | 2.08E-25    |
| Tyw5     | 164.5927288 | 1.292474198 | 0.266232171 | 4.854688274 | 1.21E-06       | 4.81E-06    |
| Abcg8    | 1263.033046 | 1.291817882 | 0.203564758 | 6.345980004 | 2.21E-10       | 1.39E-09    |
| Esr2     | 5.850872208 | 1.291783513 | 0.970245834 | 1.331398155 | 0.183058036    | 0.257595824 |
| Olfr887  | 5.258469886 | 1.291635435 | 0.978765862 | 1.319657219 | 0.18694949     | 0.262162943 |
| Ly6g2    | 1604.661875 | 1.29153888  | 0.15045468  | 8.584238641 | 9.14E-18       | 1.21E-16    |
| Tmem132e | 21.32905158 | 1.291515442 | 0.722208637 | 1.788285789 | 0.073729911    | 0.118412391 |
| Tcp10b   | 4.216274188 | 1.291266805 | 1.332108007 | 0.969340923 | 0.332375118    | 0.424603298 |
| Gm49044  | 4.058369677 | 1.289939653 | 1.072635019 | 1.202589539 | 0.229135198    | 0.311308324 |
| Amigo2   | 53.90878479 | 1.289905556 | 0.276960839 | 4.657357193 | 3.20E-06       | 1.21E-05    |
| Casp7    | 353.8496881 | 1.289253609 | 0.197145349 | 6.539609573 | 6.17E-11       | 4.14E-10    |
| Nkiras1  | 323.1821029 | 1.288933814 | 0.221188497 | 5.827309432 | 5.63E-09       | 3.00E-08    |
| Znrf1    | 1167.693565 | 1.288566503 | 0.164551955 | 7.830757797 | 4.85E-15       | 4.97E-14    |
| Ccdc159  | 146.8833006 | 1.288358431 | 0.212914142 | 6.051070264 | 1.44E-09       | 8.20E-09    |
| Slc7a15  | 0.880820831 | 1.286967139 | 1.964379664 | 0.655151936 | 0.512369937 NA |             |
| Gm10226  | 4.494911358 | 1.2867813   | 0.848065327 | 1.51731389  | 0.129187453    | 0.191979402 |
| Vmn1r197 | 13.67829715 | 1.284916788 | 0.54242226  | 2.368849664 | 0.017843505    | 0.03396941  |
| Fads1    | 4785.895751 | 1.283693133 | 0.183516001 | 6.99499295  | 2.65E-12       | 2.06E-11    |
| Ppcs     | 276.9610574 | 1.283357248 | 0.188642036 | 6.803135063 | 1.02E-11       | 7.50E-11    |
| Gm49342  | 201.335878  | 1.28318379  | 0.286877459 | 4.472933486 | 7.72E-06       | 2.77E-05    |
| Gm18337  | 41.56669843 | 1.283172827 | 0.562212356 | 2.282363261 | 0.022467902    | 0.041697453 |
| Olfr1254 | 4.517336962 | 1.283071267 | 0.845853792 | 1.516894857 | 0.129293232    | 0.192071065 |
| Mrps5    | 814.0155235 | 1.281265978 | 0.19049063  | 6.726136483 | 1.74E-11       | 1.24E-10    |
| Fbxo8    | 940.0215524 | 1.281121658 | 0.177245351 | 7.227956355 | 4.90E-13       | 4.14E-12    |

|             |             |             |             |             |                |             |
|-------------|-------------|-------------|-------------|-------------|----------------|-------------|
| Rab9        | 868.1397859 | 1.280114476 | 0.249591774 | 5.128832798 | 2.92E-07       | 1.26E-06    |
| Fahd2a      | 264.2835489 | 1.279077185 | 0.205607076 | 6.220978438 | 4.94E-10       | 2.98E-09    |
| Exph5       | 132.013743  | 1.278832588 | 0.250688547 | 5.10128046  | 3.37E-07       | 1.45E-06    |
| Fdft1       | 2902.988019 | 1.278566826 | 0.205999217 | 6.206658655 | 5.41E-10       | 3.25E-09    |
| Suclg1      | 2733.393439 | 1.278330718 | 0.186405713 | 6.857787225 | 6.99E-12       | 5.21E-11    |
| Olfr982     | 4.679362838 | 1.278300402 | 0.792572717 | 1.612849363 | 0.106777239    | 0.163185869 |
| Shmt1       | 2471.372481 | 1.277719748 | 0.163106687 | 7.833644164 | 4.74E-15       | 4.87E-14    |
| Ulk1        | 1331.615647 | 1.277666806 | 0.183182818 | 6.97481795  | 3.06E-12       | 2.37E-11    |
| Satb2       | 12.10652907 | 1.277457979 | 0.58144965  | 2.197022526 | 0.028018837    | 0.050664525 |
| H4c6        | 2.044566278 | 1.277397801 | 1.621971782 | 0.787558584 | 0.430954948    | 0.522392349 |
| Spryd7      | 435.355015  | 1.277027129 | 0.252721441 | 5.053101653 | 4.35E-07       | 1.84E-06    |
| Zfp87       | 103.7298929 | 1.276060153 | 0.318066343 | 4.011930785 | 6.02E-05       | 0.000188386 |
| Olfr851     | 7.352223225 | 1.275736653 | 0.734006126 | 1.73804633  | 0.082202651    | 0.130325564 |
| Micos10     | 760.8147391 | 1.275441151 | 0.169597713 | 7.520391205 | 5.46E-14       | 5.07E-13    |
| Zkscan3     | 1608.246872 | 1.274959637 | 0.173658485 | 7.341764116 | 2.11E-13       | 1.84E-12    |
| Bdh1        | 2803.179446 | 1.274760747 | 0.458330393 | 2.781314018 | 0.005413934    | 0.011690532 |
| Ubtfl1      | 1.857250044 | 1.274756553 | 1.406365971 | 0.906418798 | 0.364714227    | 0.457045585 |
| Atp5b       | 15259.02072 | 1.274008269 | 0.156877128 | 8.121058099 | 4.62E-16       | 5.22E-15    |
| Mmp19       | 1009.912707 | 1.272805301 | 0.194603416 | 6.540508509 | 6.13E-11       | 4.12E-10    |
| Mien1       | 727.4453748 | 1.27225354  | 0.162149574 | 7.846172572 | 4.29E-15       | 4.43E-14    |
| Tmem255b    | 1.702690244 | 1.271503742 | 1.339550157 | 0.949202041 | 0.342517864    | 0.434920642 |
| Myf6b       | 13.60535573 | 1.271449653 | 0.59753681  | 2.127818122 | 0.033352166    | 0.05909861  |
| Clec12b     | 1.977651184 | 1.270393782 | 1.34883754  | 0.941843435 | 0.346272804    | 0.438643094 |
| Lrrtm4      | 2.408785966 | 1.27033055  | 1.379942279 | 0.920567888 | 0.357276074    | 0.449674604 |
| Impa1       | 1126.590174 | 1.270329504 | 0.118114606 | 10.75505853 | 5.61E-27       | 1.53E-25    |
| Brdt        | 28.10279438 | 1.269936626 | 0.468425988 | 2.711072099 | 0.006706604    | 0.014171317 |
| Cbr4        | 465.3744469 | 1.269761309 | 0.194801151 | 6.518243371 | 7.11E-11       | 4.74E-10    |
| Gm12757     | 1.708196858 | 1.269564257 | 1.323964721 | 0.958910942 | 0.337603612    | 0.429865291 |
| Gm17823     | 2.6392698   | 1.269378463 | 1.123118067 | 1.130227089 | 0.258380548    | 0.343352684 |
| Gm7964      | 2.105195771 | 1.269367131 | 1.394301932 | 0.910396165 | 0.36261362     | 0.455082228 |
| Slc2a4rg-ps | 238.6917984 | 1.269014681 | 0.215578667 | 5.886550359 | 3.94E-09       | 2.14E-08    |
| Atp2b3      | 3.501320073 | 1.268638944 | 1.007897384 | 1.258698518 | 0.208139247    | 0.28673599  |
| Plekhf1     | 264.8260272 | 1.268482909 | 0.23397965  | 5.421338615 | 5.92E-08       | 2.79E-07    |
| Pon3        | 735.7908733 | 1.267858682 | 0.322714115 | 3.928736372 | 8.54E-05       | 0.000261456 |
| Erbb3       | 2317.487709 | 1.26772904  | 0.209309813 | 6.056710978 | 1.39E-09       | 7.95E-09    |
| Kcnc3       | 129.236399  | 1.267574486 | 0.653682958 | 1.939127327 | 0.052485836    | 0.08799304  |
| Tmem19      | 1599.446901 | 1.266564513 | 0.183919411 | 6.886518976 | 5.72E-12       | 4.31E-11    |
| Gm18811     | 1.324386241 | 1.266058833 | 1.805708806 | 0.701142304 | 0.483214212 NA |             |
| Tgm3        | 5.625621929 | 1.265563371 | 0.758029831 | 1.669542964 | 0.095009823    | 0.147852804 |
| H2bc12      | 4.586547145 | 1.264547937 | 1.061880674 | 1.190856908 | 0.233709764    | 0.31648932  |
| Gng13       | 0.434070853 | 1.264527954 | 3.119321429 | 0.405385589 | 0.685194103 NA |             |
| Clec4f      | 524.7447063 | 1.264071814 | 1.095331806 | 1.154053782 | 0.24847812     | 0.332540978 |
| Naxe        | 822.4780543 | 1.263897223 | 0.199851277 | 6.324188881 | 2.55E-10       | 1.59E-09    |
| Slc4a10     | 0.285200098 | 1.263168779 | 3.645493957 | 0.346501405 | 0.728965928 NA |             |
| Nrbf2       | 386.6939089 | 1.2618219   | 0.154333251 | 8.175956218 | 2.94E-16       | 3.38E-15    |
| Uck1        | 587.6863095 | 1.261568204 | 0.184067918 | 6.853819038 | 7.19E-12       | 5.35E-11    |
| Pde4dip     | 1223.43188  | 1.261567961 | 0.122133691 | 10.32940175 | 5.19E-25       | 1.23E-23    |
| Jtb         | 778.0061411 | 1.260771796 | 0.155171055 | 8.125044925 | 4.47E-16       | 5.06E-15    |
| Olfr1195    | 4.56031675  | 1.260689094 | 1.078848144 | 1.168551015 | 0.242584574    | 0.326252905 |
| Atp5d       | 3660.084035 | 1.260609841 | 0.121717315 | 10.35686535 | 3.90E-25       | 9.29E-24    |
| Etfbkmt     | 738.0917616 | 1.260067717 | 0.282027186 | 4.46789452  | 7.90E-06       | 2.83E-05    |
| Prkcz       | 324.0189798 | 1.259797682 | 0.317229959 | 3.97124435  | 7.15E-05       | 0.000221297 |
| Olfr970     | 1.308500255 | 1.259248239 | 1.887569753 | 0.667126731 | 0.504691187 NA |             |
| Cbs         | 6448.277276 | 1.258888496 | 0.147325572 | 8.544942198 | 1.29E-17       | 1.68E-16    |
| Nkx6-1      | 1.447229297 | 1.258549044 | 1.811211348 | 0.694865922 | 0.487139331 NA |             |
| Susd1       | 126.9021323 | 1.257973102 | 0.228464721 | 5.506202861 | 3.67E-08       | 1.77E-07    |
| Olfr1385    | 219.859463  | 1.257962709 | 0.179284419 | 7.016575757 | 2.27E-12       | 1.79E-11    |
| Psm4        | 2399.27861  | 1.257879128 | 0.180157364 | 6.982113287 | 2.91E-12       | 2.26E-11    |
| Tprkb       | 1996.124377 | 1.257451826 | 0.207125403 | 6.070968628 | 1.27E-09       | 7.32E-09    |
| Rtraf-ps    | 3.947629969 | 1.257330871 | 1.067304128 | 1.178043669 | 0.238779197    | 0.322089149 |
| Mterf3      | 406.5010705 | 1.257120884 | 0.149553228 | 8.405842548 | 4.25E-17       | 5.31E-16    |
| Dlgap1      | 33.03853893 | 1.25690355  | 0.370554148 | 3.391956502 | 0.000693955    | 0.001802215 |
| Tsacc       | 36.08078349 | 1.256896793 | 0.362059612 | 3.471518918 | 0.000517523    | 0.001378336 |
| Ccnc        | 274.9397884 | 1.256597847 | 0.185162961 | 6.786442823 | 1.15E-11       | 8.37E-11    |
| Aldh1a3     | 10.18275206 | 1.256159624 | 0.620475612 | 2.024510876 | 0.042917614    | 0.073837873 |
| Lrrc71      | 1.294520596 | 1.255825898 | 1.914824116 | 0.655843995 | 0.511924506 NA |             |

|               |             |             |             |             |                |             |
|---------------|-------------|-------------|-------------|-------------|----------------|-------------|
| Pin4          | 321.7310168 | 1.255149045 | 0.179825572 | 6.979814016 | 2.96E-12       | 2.29E-11    |
| Gpc1          | 72.97610519 | 1.254805101 | 0.373304547 | 3.361344277 | 0.000775641    | 0.001996705 |
| Rpl17-ps8     | 1.258100707 | 1.254693938 | 2.921013567 | 0.429540606 | 0.66752985 NA  |             |
| Ndufv1        | 2002.707104 | 1.254570813 | 0.107500974 | 11.67032039 | 1.81E-31       | 7.13E-30    |
| Dpp6          | 8.109486983 | 1.254085688 | 0.62409226  | 2.009455601 | 0.044488839    | 0.07619507  |
| Acat1         | 5782.48989  | 1.253981861 | 0.301769662 | 4.155427195 | 3.25E-05       | 0.000105895 |
| Pim3          | 2272.384181 | 1.2539038   | 0.354670318 | 3.535406648 | 0.000407148    | 0.00110544  |
| Zfp276        | 455.2063109 | 1.253831616 | 0.231376116 | 5.419019194 | 5.99E-08       | 2.82E-07    |
| Cog4          | 848.6087992 | 1.253628639 | 0.113189031 | 11.0755312  | 1.65E-28       | 5.07E-27    |
| Dnaja3        | 1469.675472 | 1.253510338 | 0.209186986 | 5.992295982 | 2.07E-09       | 1.16E-08    |
| Mtfr1         | 802.8262394 | 1.253293027 | 0.193057607 | 6.491808556 | 8.48E-11       | 5.59E-10    |
| 4930513O06Rik | 1.901562313 | 1.252113054 | 1.410225489 | 0.887881452 | 0.374604523    | 0.466729365 |
| Mfsd8         | 158.9927086 | 1.251737416 | 0.243095339 | 5.149162544 | 2.62E-07       | 1.14E-06    |
| Ankrd31       | 0.20384001  | 1.251272926 | 3.644913771 | 0.343292875 | 0.731378141 NA |             |
| Rnf13         | 1842.157686 | 1.251027653 | 0.196014077 | 6.38233576  | 1.74E-10       | 1.11E-09    |
| Gm47626       | 53.82014631 | 1.250291669 | 0.338654655 | 3.691937053 | 0.000222553    | 0.000634116 |
| Fam193b       | 1577.080146 | 1.249825839 | 0.162613904 | 7.685848563 | 1.52E-14       | 1.48E-13    |
| 1700001P01Rik | 1.061272471 | 1.249613131 | 1.782371066 | 0.701095948 | 0.483243139 NA |             |
| Cmtm6         | 1418.2836   | 1.249028152 | 0.158756493 | 7.867572093 | 3.62E-15       | 3.76E-14    |
| Gm20589       | 9.814182174 | 1.24880408  | 0.644956594 | 1.936260658 | 0.052835785    | 0.088490466 |
| Olfr393       | 5.291180226 | 1.248437774 | 0.781086434 | 1.598334986 | 0.109968445    | 0.167528889 |
| Vmn1r46       | 119.3116052 | 1.248370748 | 0.250568448 | 4.982154602 | 6.29E-07       | 2.60E-06    |
| Pcsk6         | 1265.936294 | 1.248270761 | 0.245602828 | 5.082477149 | 3.73E-07       | 1.59E-06    |
| Hist1h4n      | 7.368033471 | 1.247952717 | 1.591775536 | 0.784000438 | 0.433039853    | 0.524360181 |
| Tle1          | 879.1592066 | 1.247859469 | 0.157909471 | 7.902372546 | 2.74E-15       | 2.87E-14    |
| Gm2381        | 2.40209963  | 1.247645761 | 1.099184128 | 1.135065299 | 0.25634796     | 0.341236825 |
| Vmn1r174      | 5.096036259 | 1.24744779  | 0.919261134 | 1.357011347 | 0.174777605    | 0.247743295 |
| Gm7337        | 1.67884055  | 1.247300393 | 1.359409702 | 0.917530889 | 0.358864514    | 0.451240019 |
| Creg1         | 6394.133074 | 1.247178705 | 0.333739836 | 3.736978837 | 0.000186245    | 0.000538152 |
| Sec24d        | 1082.622583 | 1.246864641 | 0.20162667  | 6.184026365 | 6.25E-10       | 3.72E-09    |
| Ces1a         | 7.005851694 | 1.246639566 | 0.823204573 | 1.514373957 | 0.129931021    | 0.19289942  |
| Rbm20         | 47.14495496 | 1.246142925 | 0.352719776 | 3.532954519 | 0.000410943    | 0.001114857 |
| Zfp825        | 335.8970173 | 1.245560411 | 0.19163914  | 6.499509488 | 8.06E-11       | 5.33E-10    |
| Mrps27        | 505.9469345 | 1.245272882 | 0.177285953 | 7.024092207 | 2.15E-12       | 1.70E-11    |
| Lrpprc        | 1411.497477 | 1.245233105 | 0.139263695 | 8.941548643 | 3.84E-19       | 5.70E-18    |
| Nr1h3         | 1281.518564 | 1.244920803 | 0.222133554 | 5.604379793 | 2.09E-08       | 1.04E-07    |
| Ptprd         | 1525.58524  | 1.244773918 | 0.239185346 | 5.204223169 | 1.95E-07       | 8.68E-07    |
| Rps19-ps3     | 15.39664685 | 1.244586518 | 0.464591136 | 2.678885629 | 0.007386762    | 0.015474259 |
| Smim27        | 96.51397616 | 1.244490307 | 0.265871254 | 4.680800526 | 2.86E-06       | 1.08E-05    |
| Polg2         | 153.7748235 | 1.244303563 | 0.29068377  | 4.280609    | 1.86E-05       | 6.31E-05    |
| AC109138.2    | 6300.793281 | 1.244140358 | 0.153928187 | 8.082602561 | 6.34E-16       | 7.06E-15    |
| Gm44715       | 28.25836217 | 1.243852706 | 0.462362904 | 2.690208696 | 0.007140735    | 0.015011822 |
| Mrpl20        | 650.8664312 | 1.243844506 | 0.176122425 | 7.062385753 | 1.64E-12       | 1.31E-11    |
| Gm7666        | 224.9345303 | 1.243163337 | 0.26885653  | 4.623891179 | 3.77E-06       | 1.41E-05    |
| Dach1         | 2.997584348 | 1.24148927  | 1.343084492 | 0.92435679  | 0.355300584    | 0.447717079 |
| Akap1         | 1388.074522 | 1.240842798 | 0.260500666 | 4.763299901 | 1.90E-06       | 7.38E-06    |
| Ddo           | 245.5783026 | 1.24054925  | 0.168705072 | 7.353360716 | 1.93E-13       | 1.70E-12    |
| Gm14399       | 34.29076774 | 1.240387066 | 0.442950311 | 2.8002849   | 0.005105752    | 0.011078384 |
| Wdr93         | 21.91631978 | 1.239743617 | 0.466899715 | 2.65526745  | 0.007924555    | 0.016483248 |
| Osbp18        | 491.552393  | 1.23956152  | 0.195770441 | 6.331709305 | 2.42E-10       | 1.52E-09    |
| Rpl10-ps6     | 5.820005274 | 1.238097116 | 1.419935991 | 0.871938682 | 0.38324183     | 0.47540615  |
| Abca8a        | 1260.897985 | 1.237471627 | 0.374819047 | 3.30151746  | 0.000961633    | 0.002433778 |
| Samd11        | 3.958843863 | 1.236784464 | 1.150615992 | 1.074888992 | 0.282424431    | 0.370281604 |
| Pla2g4e       | 3.768485258 | 1.23651359  | 0.980999804 | 1.260462627 | 0.207502522    | 0.286090012 |
| Dpy19l1       | 684.1749254 | 1.236286017 | 0.156902976 | 7.879302551 | 3.29E-15       | 3.43E-14    |
| Aard          | 10.93560714 | 1.235835576 | 0.560965954 | 2.203049164 | 0.027591284    | 0.049981533 |
| Gm21988       | 87.29671574 | 1.235438332 | 0.266924322 | 4.628421729 | 3.68E-06       | 1.38E-05    |
| Olfr133       | 1.645401152 | 1.235394177 | 1.932447914 | 0.639289767 | 0.522634444    | 0.611060421 |
| Atp5o         | 2715.615197 | 1.235023363 | 0.174324451 | 7.084625001 | 1.39E-12       | 1.12E-11    |
| Glud1         | 13690.17737 | 1.234784755 | 0.20207182  | 6.110623226 | 9.92E-10       | 5.79E-09    |
| Fmo1          | 2893.756477 | 1.234700554 | 0.319776903 | 3.861131129 | 0.000112863    | 0.000338272 |
| Ggact         | 1001.734196 | 1.234456005 | 0.248296516 | 4.971700877 | 6.64E-07       | 2.74E-06    |
| Anxa8         | 3.439636278 | 1.232876008 | 0.947860695 | 1.30069325  | 0.193363474    | 0.269516842 |
| Slc26a10      | 51.81648699 | 1.232413298 | 0.611853201 | 2.014230368 | 0.043985353    | 0.075425009 |
| Tkfc          | 3996.517262 | 1.232391238 | 0.201966904 | 6.101946485 | 1.05E-09       | 6.09E-09    |
| Rps27l        | 2215.164503 | 1.232285879 | 0.188355212 | 6.542350849 | 6.06E-11       | 4.07E-10    |

|               |             |             |             |             |                |             |
|---------------|-------------|-------------|-------------|-------------|----------------|-------------|
| Slc22a7       | 648.7781939 | 1.232274465 | 0.873075789 | 1.41141752  | 0.15812154     | 0.227635198 |
| Hsf3          | 0.293546749 | 1.232104262 | 3.64531687  | 0.337996478 | 0.735365842 NA |             |
| Epha10        | 1.903151256 | 1.232042408 | 1.423052564 | 0.86577435  | 0.386613918    | 0.478892253 |
| Cenpx         | 382.6418064 | 1.231835749 | 0.195629027 | 6.29679432  | 3.04E-10       | 1.88E-09    |
| Gm10434       | 2.138866006 | 1.231778982 | 1.337657738 | 0.920847648 | 0.357129975    | 0.4495571   |
| Grsf1         | 1249.048885 | 1.23162421  | 0.158612723 | 7.764977386 | 8.17E-15       | 8.21E-14    |
| Dcdc2b        | 30.06368847 | 1.231231529 | 0.37608285  | 3.273830562 | 0.001061002    | 0.002660777 |
| Prdx1         | 14051.21841 | 1.231005845 | 0.225625949 | 5.455958642 | 4.87E-08       | 2.32E-07    |
| Arpp21        | 2.309594224 | 1.23062558  | 1.372973235 | 0.89632161  | 0.370081021    | 0.462242014 |
| Vamp7         | 516.9766882 | 1.23032724  | 0.232229755 | 5.297888025 | 1.17E-07       | 5.34E-07    |
| Gsta3         | 19381.31304 | 1.230209925 | 0.16555128  | 7.430990094 | 1.08E-13       | 9.71E-13    |
| Cipb          | 606.6395096 | 1.230046681 | 0.172643602 | 7.1247742   | 1.04E-12       | 8.50E-12    |
| Srsf4         | 899.0554167 | 1.229545525 | 0.146331801 | 8.402449194 | 4.37E-17       | 5.45E-16    |
| Glrx5         | 960.9411965 | 1.229345396 | 0.200739161 | 6.12409351  | 9.12E-10       | 5.34E-09    |
| Mrpl46        | 271.4808408 | 1.228925651 | 0.151744065 | 8.098673601 | 5.56E-16       | 6.22E-15    |
| Cops7b        | 263.9570228 | 1.228295272 | 0.18835181  | 6.521282019 | 6.97E-11       | 4.65E-10    |
| Sdc4          | 6360.206781 | 1.227981785 | 0.219951829 | 5.582957828 | 2.36E-08       | 1.17E-07    |
| Mrgprb11-ps   | 5.528287584 | 1.227595508 | 0.974261127 | 1.260027188 | 0.207659555    | 0.286260216 |
| Plin5         | 575.8407686 | 1.226963911 | 0.432391911 | 2.837619941 | 0.004545127    | 0.009973654 |
| Gm10291       | 0.768381193 | 1.226790745 | 2.656840935 | 0.461747909 | 0.644262111 NA |             |
| Olfr943       | 12.22882939 | 1.226733271 | 0.548741958 | 2.235537584 | 0.025382077    | 0.046423522 |
| Gba2          | 290.4977366 | 1.226154192 | 0.193686469 | 6.330613589 | 2.44E-10       | 1.53E-09    |
| Olfr1396      | 4.922865112 | 1.225560508 | 0.969169347 | 1.264547328 | 0.206033645    | 0.284525036 |
| Hspa1l        | 3.120408548 | 1.225460446 | 1.052205596 | 1.164658743 | 0.244157156    | 0.327811288 |
| Gm6433        | 1.207120738 | 1.224220612 | 2.528213623 | 0.484223565 | 0.628227215 NA |             |
| Fam124b       | 0.767748808 | 1.223895308 | 2.250343377 | 0.543870469 | 0.586530612 NA |             |
| Otog          | 2.631260845 | 1.223571916 | 1.308911965 | 0.934800773 | 0.349890981    | 0.442437431 |
| Gjc3          | 38.57364747 | 1.222123191 | 0.418883626 | 2.917572122 | 0.003527681    | 0.007922526 |
| Scm12         | 2.066638036 | 1.221274586 | 1.539771286 | 0.793153241 | 0.427688547    | 0.519688834 |
| Gm48415       | 251.7392735 | 1.220960205 | 0.208932148 | 5.843812061 | 5.10E-09       | 2.73E-08    |
| Gm11470       | 2.411367315 | 1.220515197 | 1.5158427   | 0.805172724 | 0.420720014    | 0.512573058 |
| Cox20         | 471.2908198 | 1.220470583 | 0.179923164 | 6.783287672 | 1.17E-11       | 8.54E-11    |
| Fgf6          | 0.745751731 | 1.220420635 | 2.283509362 | 0.534449587 | 0.593030519 NA |             |
| Gm20541       | 3.438981891 | 1.220039463 | 1.354275995 | 0.900879487 | 0.367652399    | 0.460017475 |
| Tfr2          | 5781.467507 | 1.219441203 | 0.194092206 | 6.282793253 | 3.33E-10       | 2.04E-09    |
| Gm17383       | 1.696769006 | 1.21816734  | 1.637196991 | 0.744056669 | 0.456842192    | 0.547619582 |
| Gm5834        | 61.91302714 | 1.217737244 | 0.262868685 | 4.632492615 | 3.61E-06       | 1.36E-05    |
| Fgl1          | 4723.461604 | 1.217683309 | 0.436092332 | 2.792260306 | 0.005234123    | 0.011331039 |
| Habp4         | 1347.266694 | 1.217227242 | 0.191309721 | 6.362600056 | 1.98E-10       | 1.25E-09    |
| C2cd2l        | 456.4085009 | 1.216515118 | 0.206816655 | 5.88209454  | 4.05E-09       | 2.20E-08    |
| Gm6525        | 1.881789246 | 1.215828515 | 1.795516762 | 0.677146848 | 0.498312788    | 0.587864951 |
| Nat8          | 317.5888894 | 1.215711917 | 0.490020926 | 2.480938776 | 0.013103688    | 0.025783895 |
| Aifm1         | 1692.847141 | 1.215656499 | 0.271469795 | 4.478054359 | 7.53E-06       | 2.71E-05    |
| Mrps22        | 340.96292   | 1.215011863 | 0.201501163 | 6.029800752 | 1.64E-09       | 9.29E-09    |
| Slc35a3       | 962.2571666 | 1.214540177 | 0.157355579 | 7.718443717 | 1.18E-14       | 1.16E-13    |
| Rab30         | 124.2624594 | 1.213916214 | 0.33386706  | 3.635926864 | 0.000276983    | 0.000774988 |
| Mrnip         | 205.8552358 | 1.213671503 | 0.299015364 | 4.058893457 | 4.93E-05       | 0.000156384 |
| Gm10300       | 1.874944984 | 1.213273757 | 1.347490779 | 0.900394849 | 0.367910161    | 0.460272432 |
| Il1f9         | 28.61328063 | 1.212793706 | 0.406017515 | 2.987047753 | 0.002816857    | 0.006458881 |
| Wdr83         | 338.7075221 | 1.212388638 | 0.200652029 | 6.0422446   | 1.52E-09       | 8.65E-09    |
| Micos13       | 900.1749006 | 1.212380314 | 0.151557717 | 7.999462783 | 1.25E-15       | 1.36E-14    |
| Snapc5        | 234.9728257 | 1.211725146 | 0.20201917  | 5.998070105 | 2.00E-09       | 1.12E-08    |
| Gm36128       | 4.252129945 | 1.211264832 | 0.93007724  | 1.302327139 | 0.192804578    | 0.268891725 |
| Atp5c1        | 4455.777384 | 1.210900014 | 0.151365247 | 7.999854926 | 1.25E-15       | 1.36E-14    |
| Scn2b         | 7.869823443 | 1.210779527 | 0.735509128 | 1.64617879  | 0.099726955    | 0.153998652 |
| Mfap5         | 1.166862124 | 1.210607345 | 1.649493157 | 0.733926867 | 0.462993311 NA |             |
| Olfr552       | 17.5994381  | 1.210265901 | 0.496791451 | 2.436164914 | 0.014843915    | 0.028822217 |
| Hmgcr         | 1360.878803 | 1.210115939 | 0.226310274 | 5.347154241 | 8.93E-08       | 4.12E-07    |
| Gm43540       | 21.69202863 | 1.209608851 | 0.413403439 | 2.925976752 | 0.003433766    | 0.007733677 |
| Mrpl49        | 497.4842818 | 1.209559122 | 0.146977073 | 8.229576857 | 1.88E-16       | 2.20E-15    |
| Mrps10        | 682.9983002 | 1.209351311 | 0.154488555 | 7.828096445 | 4.95E-15       | 5.07E-14    |
| Zbed5         | 76.12459723 | 1.209288218 | 0.229535585 | 5.268412822 | 1.38E-07       | 6.21E-07    |
| Usp10         | 1192.902561 | 1.208878619 | 0.174995327 | 6.908062303 | 4.91E-12       | 3.73E-11    |
| Wdr45         | 671.0094553 | 1.208807263 | 0.199398113 | 6.06228034  | 1.34E-09       | 7.70E-09    |
| Gm10912       | 1.028433701 | 1.208406732 | 2.146268162 | 0.56302691  | 0.57341656 NA  |             |
| B930094E09Rik | 8.621382083 | 1.207803053 | 0.912008849 | 1.324332602 | 0.185392607    | 0.260429562 |

|               |             |             |             |             |                |             |
|---------------|-------------|-------------|-------------|-------------|----------------|-------------|
| Olf1156       | 21.11421987 | 1.207416006 | 0.429611117 | 2.810485946 | 0.004946675    | 0.010766107 |
| 4930452B06Rik | 15.84283053 | 1.207246404 | 0.570949851 | 2.114452611 | 0.034476628    | 0.060844468 |
| Ccl19-ps1     | 0.284640255 | 1.207094102 | 3.645606168 | 0.331109299 | 0.740561928 NA |             |
| Gm2214        | 0.284629157 | 1.207043188 | 3.64560697  | 0.33109526  | 0.740572532 NA |             |
| Gm32453       | 0.788888028 | 1.206797404 | 2.722106913 | 0.443332111 | 0.657525533 NA |             |
| Pappa2        | 5.4443663   | 1.206796387 | 0.750410031 | 1.608182644 | 0.107795183    | 0.164549811 |
| Gm49184       | 0.284531989 | 1.206597227 | 3.645614001 | 0.330972293 | 0.740665414 NA |             |
| Aspscr1       | 1249.941695 | 1.206343056 | 0.174880352 | 6.898105144 | 5.27E-12       | 3.98E-11    |
| Gm44971       | 0.198114998 | 1.20629231  | 3.645618809 | 0.330888218 | 0.740728922 NA |             |
| Gm47650       | 0.198091598 | 1.206099016 | 3.645621857 | 0.33083492  | 0.740769182 NA |             |
| Gm13786       | 0.198090824 | 1.206092621 | 3.645621957 | 0.330833157 | 0.740770514 NA |             |
| Gm13246       | 0.198070163 | 1.205921873 | 3.64562465  | 0.330786076 | 0.740806079 NA |             |
| Creld1        | 796.3243806 | 1.205876778 | 0.199564866 | 6.042530458 | 1.52E-09       | 8.63E-09    |
| Gm2830        | 0.284370171 | 1.205853736 | 3.645625724 | 0.330767288 | 0.740820271 NA |             |
| Gm5829        | 0.198061288 | 1.205848509 | 3.645625807 | 0.330765847 | 0.74082136 NA  |             |
| Axin2         | 88.21637426 | 1.205687991 | 0.468771813 | 2.572014693 | 0.01011086     | 0.020512905 |
| Gm9712        | 0.198026144 | 1.20557878  | 3.64563039  | 0.330685711 | 0.740881897 NA |             |
| Cipc          | 609.6649952 | 1.205498577 | 0.201829858 | 5.972845581 | 2.33E-09       | 1.30E-08    |
| Ccl27a        | 144.2733339 | 1.205218013 | 0.223928496 | 5.382155628 | 7.36E-08       | 3.44E-07    |
| Tcea3         | 1133.141914 | 1.205069296 | 0.185366953 | 6.500993165 | 7.98E-11       | 5.28E-10    |
| 1700018M17Rik | 0.196934924 | 1.205035822 | 3.645638624 | 0.330541764 | 0.740990641 NA |             |
| Gm5960        | 0.197950398 | 1.204930826 | 3.64564028  | 0.330512814 | 0.741012512 NA |             |
| Gm14860       | 0.284131826 | 1.204756796 | 3.645643025 | 0.330464828 | 0.741048764 NA |             |
| Gm47265       | 1.047860137 | 1.20473619  | 1.847559969 | 0.652068788 | 0.514356798 NA |             |
| Gm7639        | 0.196810766 | 1.203996424 | 3.645655021 | 0.330255172 | 0.741207162 NA |             |
| Gm15215       | 0.196787228 | 1.203799101 | 3.645658134 | 0.330200764 | 0.74124827 NA  |             |
| Gm11743       | 0.566022352 | 1.203275029 | 2.53312047  | 0.475016898 | 0.634774929 NA |             |
| Gm14927       | 0.197750512 | 1.20327187  | 3.645666453 | 0.330055392 | 0.741358108 NA |             |
| Tmprss13      | 0.559873256 | 1.203151029 | 2.537909785 | 0.47407163  | 0.635448829 NA |             |
| Gm5791        | 0.283771458 | 1.203094081 | 3.645669259 | 0.330006371 | 0.741395148 NA |             |
| Gm42647       | 0.197725918 | 1.203067323 | 3.645669681 | 0.329998993 | 0.741400723 NA |             |
| Gm37070       | 0.197721098 | 1.203027229 | 3.645670314 | 0.329987938 | 0.741409076 NA |             |
| Gm13679       | 0.197640498 | 1.202356172 | 3.645680905 | 0.32980291  | 0.741548888 NA |             |
| Gm14903       | 0.196613221 | 1.20233764  | 3.645681197 | 0.3297978   | 0.74155275 NA  |             |
| Gm16005       | 0.19763008  | 1.20226936  | 3.645682275 | 0.329778974 | 0.741566976 NA |             |
| Gm14914       | 2.511803237 | 1.201980488 | 1.655751704 | 0.725942474 | 0.467874037    | 0.55840917  |
| Txnrd3        | 155.89342   | 1.201745483 | 0.173806275 | 6.914281337 | 4.70E-12       | 3.57E-11    |
| Tst           | 4123.518427 | 1.201558787 | 0.148701426 | 8.080344729 | 6.46E-16       | 7.19E-15    |
| Gm6450        | 0.196492955 | 1.201324714 | 3.645697188 | 0.329518512 | 0.741763804 NA |             |
| Uqcr10        | 1738.003358 | 1.20132055  | 0.141995211 | 8.460289188 | 2.67E-17       | 3.40E-16    |
| Gm47954       | 0.197346511 | 1.200948852 | 3.645673344 | 0.329417569 | 0.74184009 NA  |             |
| Olf1290       | 0.536444442 | 1.200404338 | 2.556868294 | 0.469482273 | 0.638724953 NA |             |
| Plbd1         | 550.7985071 | 1.200015117 | 0.448796101 | 2.673853702 | 0.007498516    | 0.015689088 |
| Sepsecc       | 887.3260391 | 1.199830051 | 0.185981768 | 6.451331556 | 1.11E-10       | 7.20E-10    |
| Hspb9         | 0.196303756 | 1.199726518 | 3.645722425 | 0.329077856 | 0.742096842 NA |             |
| Nr1d2         | 1180.699082 | 1.199504945 | 0.244953737 | 4.896863229 | 9.74E-07       | 3.94E-06    |
| Aasdhppt      | 467.6053263 | 1.198947183 | 0.173210334 | 6.921914865 | 4.46E-12       | 3.40E-11    |
| ler3ip1       | 489.0231942 | 1.198871517 | 0.196045117 | 6.11528374  | 9.64E-10       | 5.63E-09    |
| Gm49550       | 0.282852782 | 1.198832368 | 3.64573655  | 0.328831322 | 0.742283187 NA |             |
| Gm9273        | 0.196197157 | 1.1988235   | 3.64573669  | 0.328828876 | 0.742285035 NA |             |
| Ptpmt1        | 580.2662509 | 1.197674751 | 0.171118256 | 6.99910564  | 2.58E-12       | 2.01E-11    |
| Gm11993       | 0.19605049  | 1.197578037 | 3.64575637  | 0.328485482 | 0.74254462 NA  |             |
| Gm19936       | 0.196029938 | 1.197403236 | 3.645759132 | 0.328437286 | 0.742581055 NA |             |
| Klra10        | 0.282518246 | 1.197272169 | 3.645761204 | 0.328401149 | 0.742608374 NA |             |
| Gm7880        | 0.19599498  | 1.19710574  | 3.645763834 | 0.328355262 | 0.742643065 NA |             |
| Mrpl38        | 1149.087161 | 1.197046393 | 0.150712434 | 7.942585511 | 1.98E-15       | 2.11E-14    |
| Gm8804        | 0.197000401 | 1.196990573 | 3.645765655 | 0.328323509 | 0.742667071 NA |             |
| Gm4754        | 0.196988359 | 1.196889014 | 3.64576726  | 0.328295508 | 0.74268824 NA  |             |
| Gm19087       | 0.195926507 | 1.19652246  | 3.645773054 | 0.328194444 | 0.742764648 NA |             |
| Gm16420       | 0.196941219 | 1.196491187 | 3.645773548 | 0.328185821 | 0.742771168 NA |             |
| Gm18869       | 0.282247072 | 1.196004194 | 3.645781247 | 0.328051551 | 0.742872685 NA |             |
| Gm26566       | 0.195858572 | 1.195942987 | 3.645782215 | 0.328034676 | 0.742885444 NA |             |
| Stab2         | 423.2197194 | 1.195925667 | 0.343057035 | 3.48608408  | 0.000490147    | 0.001312808 |
| Ifna16        | 0.196823425 | 1.195495549 | 3.64578929  | 0.327911312 | 0.742978721 NA |             |
| Zfp661        | 100.7922919 | 1.195458985 | 0.341074166 | 3.504982506 | 0.000456637    | 0.001228266 |
| Gm34767       | 0.196792768 | 1.195236053 | 3.645793393 | 0.327839766 | 0.743032819 NA |             |



|          |             |             |             |             |             |    |             |
|----------|-------------|-------------|-------------|-------------|-------------|----|-------------|
| Wfdc13   | 0.19678619  | 1.195180358 | 3.645794274 | 0.32782441  | 0.74304443  | NA |             |
| Bnc2     | 5.458261518 | 1.195054832 | 0.834961506 | 1.431269373 | 0.152353028 |    | 0.220728684 |
| Apobec2  | 0.282023558 | 1.194956848 | 3.645797808 | 0.327762786 | 0.743091026 | NA |             |
| Serpnb13 | 0.282001005 | 1.194851059 | 3.645799481 | 0.327733619 | 0.743113082 | NA |             |
| Fam8a1   | 1223.327673 | 1.194726508 | 0.160317949 | 7.452231725 | 9.18E-14    |    | 8.34E-13    |
| Gm12667  | 0.28194135  | 1.194571131 | 3.645803908 | 0.32765644  | 0.743171442 | NA |             |
| Gm12917  | 1.872506302 | 1.194207434 | 1.395518619 | 0.855744537 | 0.3921391   |    | 0.48467972  |
| Slc25a35 | 32.24194047 | 1.194174951 | 0.454025786 | 2.630191911 | 0.008533668 |    | 0.017636316 |
| Gm15470  | 0.196665267 | 1.19415519  | 3.645810487 | 0.327541762 | 0.743258162 | NA |             |
| Cyp4a30b | 0.281832592 | 1.19406042  | 3.645811986 | 0.327515633 | 0.743277921 | NA |             |
| Gm10571  | 0.196597973 | 1.193583654 | 3.645819528 | 0.327384185 | 0.743377327 | NA |             |
| Cplx4    | 0.196576309 | 1.193399504 | 3.645822442 | 0.327333413 | 0.743415723 | NA |             |
| Ppp1r17  | 0.196575245 | 1.193390454 | 3.645822585 | 0.327330918 | 0.74341761  | NA |             |
| Ccdc27   | 0.195543457 | 1.193245116 | 3.645824884 | 0.327290848 | 0.743447914 | NA |             |
| Tchhl1   | 0.281647936 | 1.193192207 | 3.645825721 | 0.32727626  | 0.743458946 | NA |             |
| Olfr857  | 0.281602495 | 1.19297834  | 3.645829105 | 0.327217296 | 0.74350354  | NA |             |
| Rasgef1c | 0.196522993 | 1.192945967 | 3.645829617 | 0.32720837  | 0.743510291 | NA |             |
| Gm7962   | 0.281595219 | 1.192944087 | 3.645829647 | 0.327207852 | 0.743510682 | NA |             |
| Vmn1r22  | 0.196494816 | 1.192706082 | 3.645833413 | 0.327142233 | 0.743560311 | NA |             |
| Gm8844   | 0.281543465 | 1.192700391 | 3.645833503 | 0.327140663 | 0.743561497 | NA |             |
| Hrc      | 0.196493294 | 1.192693122 | 3.645833618 | 0.327138659 | 0.743563013 | NA |             |
| Maneal   | 0.195478225 | 1.192684546 | 3.645833754 | 0.327136295 | 0.743564801 | NA |             |
| Egln3    | 187.6724979 | 1.192665285 | 0.366313701 | 3.255857705 | 0.001130504 |    | 0.002821378 |
| Arrdc2   | 340.642766  | 1.192588026 | 0.382633244 | 3.11679146  | 0.001828309 |    | 0.004356255 |
| Olfr1500 | 0.196470752 | 1.192501116 | 3.645836656 | 0.327085722 | 0.74360305  | NA |             |
| Gm44502  | 20.9906864  | 1.192467067 | 1.63476742  | 0.729441419 | 0.465731689 |    | 0.556202721 |
| Olfr786  | 0.196462296 | 1.192429068 | 3.645837797 | 0.327065858 | 0.743618074 | NA |             |
| Olfr658  | 0.196456846 | 1.19238263  | 3.645838531 | 0.327053055 | 0.743627758 | NA |             |
| Cradd    | 212.5662137 | 1.192382474 | 0.175209571 | 6.805464258 | 1.01E-11    |    | 7.39E-11    |
| Neto1    | 0.19543123  | 1.192280262 | 3.645840151 | 0.327024832 | 0.743649104 | NA |             |
| Olfr90   | 74.31622838 | 1.192256119 | 0.268998983 | 4.432195643 | 9.33E-06    |    | 3.31E-05    |
| Olfr390  | 0.196424051 | 1.192103067 | 3.645842956 | 0.326975978 | 0.743686054 | NA |             |
| Olfr1469 | 0.19540938  | 1.192092159 | 3.645843128 | 0.326972971 | 0.743688329 | NA |             |
| Sypl2    | 0.196407905 | 1.19196536  | 3.645845135 | 0.326938012 | 0.74371477  | NA |             |
| Gm12021  | 1.163088131 | 1.191934117 | 1.800837102 | 0.66187781  | 0.508049534 | NA |             |
| Gm48931  | 0.196363942 | 1.19159502  | 3.645851073 | 0.326834579 | 0.743793004 | NA |             |
| Unc80    | 0.196340284 | 1.191388183 | 3.645854271 | 0.326778882 | 0.743835133 | NA |             |
| Rhox4f   | 0.922582673 | 1.191055812 | 2.250669571 | 0.529200655 | 0.596666262 | NA |             |
| Olfr1297 | 33.58034515 | 1.190891119 | 0.430040966 | 2.769250406 | 0.005618543 |    | 0.012091003 |
| Gm45105  | 5.005979888 | 1.19080087  | 0.808922269 | 1.472083185 | 0.140998416 |    | 0.206453748 |
| Wdr18    | 923.017997  | 1.190679639 | 0.165903878 | 7.176924685 | 7.13E-13    |    | 5.94E-12    |
| Mmachc   | 223.6876503 | 1.190385698 | 0.271737775 | 4.38064122  | 1.18E-05    |    | 4.12E-05    |
| Serpig1  | 10299.22147 | 1.189743932 | 0.294709574 | 4.037004691 | 5.41E-05    |    | 0.000170505 |
| Nap113   | 10.44796966 | 1.189699417 | 0.571543854 | 2.081554038 | 0.037383223 |    | 0.065365045 |
| Paxx     | 407.9026889 | 1.189697331 | 0.153178622 | 7.766732155 | 8.05E-15    |    | 8.10E-14    |
| Gm2099   | 3.49445215  | 1.189667553 | 1.018323231 | 1.168261233 | 0.242701408 |    | 0.326358542 |
| Gm11212  | 0.544532251 | 1.188882552 | 2.97271367  | 0.399931741 | 0.689206793 | NA |             |
| Acyp1    | 121.466329  | 1.188414818 | 0.214612563 | 5.537489526 | 3.07E-08    |    | 1.50E-07    |
| Mfn1     | 809.0423072 | 1.188168285 | 0.211584625 | 5.615570062 | 1.96E-08    |    | 9.81E-08    |
| Chn2     | 394.9614715 | 1.187894646 | 0.159418973 | 7.451400689 | 9.24E-14    |    | 8.38E-13    |
| Olfr784  | 24.57080385 | 1.187586144 | 0.377336547 | 3.1472863   | 0.001647935 |    | 0.00397313  |
| Angptl7  | 3.908925193 | 1.187532568 | 0.999408032 | 1.188235966 | 0.234740458 |    | 0.31756416  |
| Gm14057  | 16.08054317 | 1.1873576   | 0.504209085 | 2.354891326 | 0.018528123 |    | 0.035108086 |
| Slc25a44 | 657.5349847 | 1.187191184 | 0.194834919 | 6.093318328 | 1.11E-09    |    | 6.42E-09    |
| Sirt7    | 977.6715514 | 1.18715778  | 0.15847195  | 7.49128021  | 6.82E-14    |    | 6.26E-13    |
| Vmn1r76  | 26.71274454 | 1.186765638 | 0.417934916 | 2.839594377 | 0.004517093 |    | 0.009921077 |
| Ccdc124  | 546.9222433 | 1.186756588 | 0.146059228 | 8.12517363  | 4.47E-16    |    | 5.06E-15    |
| Bsdc1    | 944.7655633 | 1.185667652 | 0.161328952 | 7.349379249 | 1.99E-13    |    | 1.75E-12    |
| Rab43    | 1945.76858  | 1.185608744 | 0.20732844  | 5.718505121 | 1.07E-08    |    | 5.55E-08    |
| Aars2    | 356.0992697 | 1.185253731 | 0.176414787 | 6.71856226  | 1.84E-11    |    | 1.30E-10    |
| Ppfia2   | 4.404948902 | 1.184521803 | 1.044493326 | 1.134063545 | 0.256767894 |    | 0.341711155 |
| Uba52    | 2202.28252  | 1.184020228 | 0.270205711 | 4.381921559 | 1.18E-05    |    | 4.10E-05    |
| Fgd6     | 685.2271919 | 1.18215576  | 0.211886181 | 5.579201778 | 2.42E-08    |    | 1.20E-07    |
| Trim43a  | 1.221758687 | 1.181822524 | 2.225929379 | 0.53093442  | 0.595464225 | NA |             |
| Pgrmc2   | 862.6815625 | 1.181686708 | 0.128333904 | 9.207907445 | 3.33E-20    |    | 5.39E-19    |
| Atg7     | 695.8844101 | 1.181673908 | 0.202290372 | 5.841473789 | 5.17E-09    |    | 2.76E-08    |

|               |             |             |             |             |             |    |             |
|---------------|-------------|-------------|-------------|-------------|-------------|----|-------------|
| Gm27021       | 0.788325873 | 1.181662123 | 3.273664028 | 0.360960109 | 0.718129268 | NA |             |
| Cdh10         | 5.759035725 | 1.181492527 | 0.851630508 | 1.38732997  | 0.165341168 |    | 0.236154175 |
| Psmb6         | 2363.806105 | 1.180813101 | 0.130886035 | 9.021688959 | 1.85E-19    |    | 2.81E-18    |
| Ryr3          | 5.700023921 | 1.180654287 | 0.940601806 | 1.255211589 | 0.20940196  |    | 0.288149537 |
| Myom2         | 6.447568645 | 1.180494044 | 0.834647861 | 1.414361792 | 0.157255702 |    | 0.226599207 |
| Gm6222        | 0.786588816 | 1.179974759 | 2.053245746 | 0.574687546 | 0.565502632 | NA |             |
| Ndufa11       | 953.9707957 | 1.178928317 | 0.156979711 | 7.510068061 | 5.91E-14    |    | 5.47E-13    |
| Hadhb         | 2322.848128 | 1.177674744 | 0.176198385 | 6.683799873 | 2.33E-11    |    | 1.63E-10    |
| Zfp874a       | 232.8213999 | 1.17767353  | 0.256614512 | 4.589270968 | 4.45E-06    |    | 1.65E-05    |
| Sap18         | 357.9478071 | 1.177592876 | 0.211997717 | 5.554743191 | 2.78E-08    |    | 1.36E-07    |
| Gm11799       | 0.793808061 | 1.177555653 | 2.679097471 | 0.439534457 | 0.66027432  | NA |             |
| Ttc39d        | 0.567168355 | 1.17707903  | 2.946660943 | 0.399461985 | 0.689552829 | NA |             |
| Hddc3         | 147.5046622 | 1.176631848 | 0.204992042 | 5.739890363 | 9.47E-09    |    | 4.93E-08    |
| Osgepl1       | 267.2983575 | 1.176628468 | 0.258985685 | 4.543218166 | 5.54E-06    |    | 2.03E-05    |
| Gm47860       | 3.95833109  | 1.176432256 | 1.28593817  | 0.914843562 | 0.360273762 |    | 0.452612166 |
| Slc10a5       | 312.9266944 | 1.176332571 | 0.256763585 | 4.581383966 | 4.62E-06    |    | 1.71E-05    |
| Gm45880       | 1.298322465 | 1.176008949 | 1.963114047 | 0.599052791 | 0.549137681 | NA |             |
| Zbtb7b        | 1198.226021 | 1.175991822 | 0.189521879 | 6.205045169 | 5.47E-10    |    | 3.28E-09    |
| Tnfaip81      | 334.6349518 | 1.175583975 | 0.310590602 | 3.784995318 | 0.000153711 |    | 0.000450316 |
| Olfr1264      | 5.806730034 | 1.175463731 | 0.930071945 | 1.263841725 | 0.206286841 |    | 0.284828547 |
| Lias          | 417.8977578 | 1.174824153 | 0.144865147 | 8.109777792 | 5.07E-16    |    | 5.70E-15    |
| Gm47685       | 1.081948679 | 1.17468047  | 1.810982779 | 0.64864254  | 0.516569452 | NA |             |
| Gm12902       | 1.9113657   | 1.174480033 | 1.408063408 | 0.834110187 | 0.404218895 |    | 0.497087479 |
| Gm12789       | 5.068154164 | 1.174043545 | 0.924388182 | 1.270076324 | 0.204057444 |    | 0.282138792 |
| Tent5c        | 121.3608089 | 1.173778707 | 0.270995447 | 4.331359517 | 1.48E-05    |    | 5.09E-05    |
| Ndufa10       | 2301.705654 | 1.17341291  | 0.165638165 | 7.084194082 | 1.40E-12    |    | 1.13E-11    |
| Ccbe1         | 25.35540699 | 1.172986101 | 0.443874496 | 2.642607565 | 0.008227033 |    | 0.017039783 |
| Gm9821        | 0.565261065 | 1.171731612 | 2.948905301 | 0.397344605 | 0.691113359 | NA |             |
| Anks4b        | 1042.385731 | 1.1713438   | 0.141823072 | 8.259190689 | 1.47E-16    |    | 1.73E-15    |
| Oxsm          | 510.7037618 | 1.170804671 | 0.215717208 | 5.427497794 | 5.71E-08    |    | 2.70E-07    |
| Ubxn1         | 2042.41332  | 1.170389928 | 0.120981613 | 9.674114061 | 3.88E-22    |    | 7.31E-21    |
| Gm48774       | 46.70328094 | 1.169911828 | 0.410959791 | 2.846779306 | 0.004416397 |    | 0.009717441 |
| H2-K1         | 19158.4391  | 1.169502325 | 0.209247929 | 5.589074786 | 2.28E-08    |    | 1.13E-07    |
| Wrnip1        | 611.3543165 | 1.169376037 | 0.131154121 | 8.916044908 | 4.83E-19    |    | 7.11E-18    |
| Pex11b        | 374.0655587 | 1.169368885 | 0.174907036 | 6.68565949  | 2.30E-11    |    | 1.61E-10    |
| Mtx1          | 555.276072  | 1.168890889 | 0.157373493 | 7.427495344 | 1.11E-13    |    | 9.94E-13    |
| Slc2a8        | 235.582801  | 1.168339775 | 0.185408724 | 6.301428271 | 2.95E-10    |    | 1.82E-09    |
| Sucla2        | 1453.345247 | 1.167830072 | 0.169150654 | 6.904082518 | 5.05E-12    |    | 3.83E-11    |
| Olfr107       | 3.852610867 | 1.167383835 | 0.988833846 | 1.180566219 | 0.23777509  |    | 0.321076415 |
| Ces1c         | 36098.30649 | 1.167135138 | 0.16583773  | 7.037814228 | 1.95E-12    |    | 1.55E-11    |
| Ccnf          | 332.7111446 | 1.166974359 | 0.262634649 | 4.443337402 | 8.86E-06    |    | 3.15E-05    |
| Gm6654        | 1.646528629 | 1.166313098 | 1.834726109 | 0.635687851 | 0.524979896 |    | 0.613129908 |
| Dnaja4        | 79.03975831 | 1.166231267 | 0.284560795 | 4.098355387 | 4.16E-05    |    | 0.000133564 |
| Gm8624        | 9.007469134 | 1.165622515 | 0.74426257  | 1.56614421  | 0.11731486  |    | 0.17697405  |
| Il17f         | 1.740281122 | 1.165548624 | 1.275389739 | 0.913876432 | 0.360781779 |    | 0.453150208 |
| B230118H07Rik | 195.7658052 | 1.164316722 | 0.297385599 | 3.915175199 | 9.03E-05    |    | 0.000275115 |
| Fbxo31        | 941.1130619 | 1.164108583 | 0.346437546 | 3.360226386 | 0.000778786 |    | 0.002003433 |
| Bcar3         | 615.8762358 | 1.164060162 | 0.224892455 | 5.176074762 | 2.27E-07    |    | 9.96E-07    |
| Tcp11l2       | 464.2066741 | 1.163796178 | 0.197286617 | 5.899012299 | 3.66E-09    |    | 1.99E-08    |
| Gm16378       | 5.318882974 | 1.163758894 | 0.985940544 | 1.18035403  | 0.237859437 |    | 0.321164873 |
| Dvl1          | 1457.208818 | 1.163562926 | 0.224312459 | 5.18724163  | 2.13E-07    |    | 9.44E-07    |
| Rgs20         | 6.14510456  | 1.163210957 | 0.729343005 | 1.594875043 | 0.110740181 |    | 0.168547327 |
| Atp5g3        | 5742.287335 | 1.162518858 | 0.154093063 | 7.544264717 | 4.55E-14    |    | 4.26E-13    |
| Mrpl21        | 387.037329  | 1.161815888 | 0.154870406 | 7.501858604 | 6.29E-14    |    | 5.80E-13    |
| Mpc2          | 2616.2917   | 1.16148343  | 0.19778521  | 5.872448343 | 4.29E-09    |    | 2.32E-08    |
| Tmem29        | 152.1913324 | 1.161473085 | 0.350138787 | 3.317179154 | 0.000909313 |    | 0.002313381 |
| Gm14469       | 1.98115654  | 1.161365142 | 1.282478548 | 0.905563016 | 0.365167192 |    | 0.457466628 |
| Junb          | 2829.521275 | 1.160821681 | 0.235340298 | 4.932524062 | 8.12E-07    |    | 3.32E-06    |
| Cox5b         | 3346.619094 | 1.160464647 | 0.212266986 | 5.46700487  | 4.58E-08    |    | 2.18E-07    |
| Zfp983        | 57.86936073 | 1.160029113 | 0.264761041 | 4.381419222 | 1.18E-05    |    | 4.11E-05    |
| Ugdh          | 3762.551657 | 1.159167089 | 0.261770943 | 4.428173253 | 9.50E-06    |    | 3.37E-05    |
| Gm49387       | 18.9424075  | 1.159159115 | 0.995221785 | 1.164724419 | 0.244130561 |    | 0.327811288 |
| Plip          | 169.1010612 | 1.159157057 | 0.264955171 | 4.374917661 | 1.21E-05    |    | 4.23E-05    |
| Olfr1150-ps1  | 1.913411113 | 1.159083972 | 1.313149376 | 0.882674883 | 0.377411957 |    | 0.469438132 |
| Gchfr         | 1142.328884 | 1.158815364 | 0.341227948 | 3.396015396 | 0.000683745 |    | 0.001778259 |
| Olfr607       | 28.42015084 | 1.158695218 | 0.463123188 | 2.50191579  | 0.01235233  |    | 0.024503436 |

|               |             |             |             |             |                |             |
|---------------|-------------|-------------|-------------|-------------|----------------|-------------|
| Gm2115        | 6.739863385 | 1.158057609 | 0.709154516 | 1.633011682 | 0.10246654     | 0.157601008 |
| Cdnf          | 12.19896153 | 1.158047281 | 0.609135706 | 1.901131831 | 0.057284747    | 0.094897519 |
| Taf13         | 267.209345  | 1.157914668 | 0.232999284 | 4.969606123 | 6.71E-07       | 2.77E-06    |
| Hemk1         | 206.3089576 | 1.157536463 | 0.329226904 | 3.515923057 | 0.000438228    | 0.00118248  |
| Gm31274       | 1.716560348 | 1.157483369 | 1.694620842 | 0.683033833 | 0.494585464    | 0.584438414 |
| Gnptg         | 413.767607  | 1.157430213 | 0.156612741 | 7.390396222 | 1.46E-13       | 1.30E-12    |
| Prss36        | 103.3071974 | 1.156443996 | 0.299860406 | 3.856607854 | 0.000114971    | 0.000343986 |
| Mrpl27        | 626.7702958 | 1.156331768 | 0.119029268 | 9.71468432  | 2.61E-22       | 4.98E-21    |
| Retnla        | 0.809816094 | 1.156171785 | 1.988476156 | 0.581436082 | 0.560946585 NA |             |
| Krt10         | 31.42015324 | 1.155933196 | 0.420927697 | 2.746156182 | 0.006029805    | 0.012876878 |
| Olfr1109      | 0.801387345 | 1.155557401 | 1.989990952 | 0.580684751 | 0.561452941 NA |             |
| Olfr671       | 1.347804818 | 1.154446154 | 1.698626476 | 0.679635088 | 0.496735547 NA |             |
| Ssmem1        | 2.180571314 | 1.153812019 | 1.185414475 | 0.973340585 | 0.330384058    | 0.422471304 |
| Acmsd         | 314.0068285 | 1.153756917 | 0.36349952  | 3.174025973 | 0.001503402    | 0.003650998 |
| Gm6238        | 0.527601059 | 1.153276836 | 3.599236138 | 0.320422665 | 0.748647946 NA |             |
| Lipt1         | 108.5729949 | 1.15284508  | 0.226402057 | 5.092025639 | 3.54E-07       | 1.52E-06    |
| Grin2b        | 2.460292087 | 1.152280278 | 1.276752692 | 0.902508595 | 0.366786758    | 0.459203984 |
| H1f1          | 5.96929285  | 1.152181697 | 1.195206212 | 0.964002433 | 0.335044706    | 0.427181374 |
| Foxp2         | 51.63867622 | 1.152144839 | 0.38767762  | 2.971914756 | 0.002959488    | 0.006762278 |
| Rnf217        | 380.6944847 | 1.15156664  | 0.173016921 | 6.655802528 | 2.82E-11       | 1.96E-10    |
| Psmd12        | 1312.642429 | 1.151274226 | 0.134560228 | 8.555828444 | 1.17E-17       | 1.53E-16    |
| Gm45888       | 0.942282151 | 1.151003015 | 1.970307619 | 0.58417427  | 0.55910307 NA  |             |
| Ormdl2        | 600.1516823 | 1.150418374 | 0.154499212 | 7.446111604 | 9.61E-14       | 8.71E-13    |
| Gin1          | 230.0413431 | 1.150258135 | 0.24727236  | 4.651786131 | 3.29E-06       | 1.24E-05    |
| Apol          | 394.5489889 | 1.149999122 | 0.263728846 | 4.36053598  | 1.30E-05       | 4.49E-05    |
| Tsku          | 1960.03572  | 1.14910936  | 0.487047649 | 2.359336634 | 0.01830764     | 0.034746764 |
| Plpp7         | 16.40018315 | 1.148921669 | 0.452678526 | 2.538052068 | 0.01114714     | 0.022394113 |
| Znrd1as       | 156.9245139 | 1.148904663 | 0.197385103 | 5.820624976 | 5.86E-09       | 3.12E-08    |
| Cyp2j8        | 5.448588068 | 1.148518602 | 0.981838394 | 1.169763384 | 0.242096203    | 0.325762456 |
| Dmac1         | 368.354059  | 1.148498761 | 0.161076613 | 7.130139736 | 1.00E-12       | 8.21E-12    |
| D130043K22Rik | 76.9931789  | 1.147726274 | 0.437773823 | 2.621733448 | 0.008748382    | 0.018005846 |
| Olfr137       | 10.30449791 | 1.147582652 | 0.638155243 | 1.798281318 | 0.072132439    | 0.116175136 |
| 4931422A03Rik | 0.532727306 | 1.1473705   | 2.924386261 | 0.392345743 | 0.694802769 NA |             |
| Hmbs          | 758.9984781 | 1.14718462  | 0.187909983 | 6.104968988 | 1.03E-09       | 5.98E-09    |
| Zynpo2l       | 5.712903328 | 1.147064419 | 0.958476557 | 1.196757929 | 0.231400921    | 0.313819487 |
| Sbtb48        | 274.1443791 | 1.146904472 | 0.246091725 | 4.660475574 | 3.15E-06       | 1.19E-05    |
| Dnajc12       | 128.9001805 | 1.146658934 | 0.392240786 | 2.923354669 | 0.003462818    | 0.007792255 |
| Ppfbp2        | 490.1637253 | 1.146531694 | 0.251199461 | 4.564228323 | 5.01E-06       | 1.85E-05    |
| Acsm3         | 1751.937743 | 1.146361466 | 0.214363404 | 5.347747994 | 8.91E-08       | 4.11E-07    |
| Plcxd2        | 1284.713334 | 1.146215889 | 0.305443859 | 3.752623785 | 0.000174993    | 0.000508226 |
| Gm4788        | 3498.384828 | 1.146095945 | 0.316748653 | 3.618313555 | 0.000296529    | 0.000824267 |
| Alb           | 898097.7934 | 1.145550098 | 0.205639453 | 5.570672757 | 2.54E-08       | 1.25E-07    |
| Vmn1r89       | 0.783778966 | 1.145520783 | 2.697449786 | 0.424668066 | 0.671078667 NA |             |
| Gsdmcl2       | 4.863598652 | 1.145292684 | 0.910035704 | 1.258514012 | 0.208205923    | 0.286758327 |
| Apip          | 280.7132003 | 1.145071027 | 0.195653703 | 5.852539522 | 4.84E-09       | 2.60E-08    |
| Rps6ka6       | 3.558538573 | 1.144890221 | 1.370465178 | 0.835402635 | 0.403491047    | 0.496478915 |
| Ccdc58        | 506.4561931 | 1.144825854 | 0.177839665 | 6.437404449 | 1.22E-10       | 7.87E-10    |
| Gm8213        | 2.065925413 | 1.144639406 | 1.303917282 | 0.877846641 | 0.380026949    | 0.472002994 |
| Nphs1         | 1.060250522 | 1.144204807 | 2.494221278 | 0.4587423   | 0.646419234 NA |             |
| Coa6          | 375.8957565 | 1.143502939 | 0.278355783 | 4.108062448 | 3.99E-05       | 0.000128461 |
| Mcur1         | 687.7842823 | 1.142101238 | 0.15309591  | 7.460037538 | 8.65E-14       | 7.87E-13    |
| Dedd2         | 440.6323547 | 1.14200939  | 0.16572668  | 6.890920568 | 5.54E-12       | 4.18E-11    |
| Mtrf1         | 100.2650193 | 1.14187921  | 0.255112579 | 4.47598161  | 7.61E-06       | 2.73E-05    |
| Bloc1s5       | 279.1315219 | 1.141191022 | 0.257020725 | 4.440073938 | 8.99E-06       | 3.20E-05    |
| Ndufa6        | 2770.699936 | 1.141074097 | 0.117477421 | 9.713135371 | 2.65E-22       | 5.05E-21    |
| Enpp2         | 1042.65691  | 1.141035197 | 0.269339141 | 4.23642547  | 2.27E-05       | 7.59E-05    |
| Gm6485        | 0.530608657 | 1.14074823  | 2.927144175 | 0.389713715 | 0.696748254 NA |             |
| Pomp          | 1612.808889 | 1.140458425 | 0.156283699 | 7.297360057 | 2.93E-13       | 2.53E-12    |
| AL731706.1    | 218.1149628 | 1.138912367 | 0.219951008 | 5.178027501 | 2.24E-07       | 9.87E-07    |
| Gm48674       | 2.912777381 | 1.138710454 | 1.476558668 | 0.77119215  | 0.440593046    | 0.531872874 |
| Cpn1          | 4209.813886 | 1.138472725 | 0.153098368 | 7.436217256 | 1.04E-13       | 9.36E-13    |
| Rmnd1         | 541.6660655 | 1.138185457 | 0.219299025 | 5.190107235 | 2.10E-07       | 9.32E-07    |
| Creb5         | 485.7863985 | 1.137843799 | 0.313784033 | 3.626200442 | 0.000287622    | 0.00080173  |
| Arsa          | 975.2286796 | 1.137825204 | 0.264529872 | 4.301310831 | 1.70E-05       | 5.78E-05    |
| Vmn1r12       | 5.771456652 | 1.137718447 | 0.743676277 | 1.52985712  | 0.126052099    | 0.187975524 |
| Fam162a       | 739.1796929 | 1.136857741 | 0.177515214 | 6.404283412 | 1.51E-10       | 9.68E-10    |



|             |             |             |             |             |                |             |
|-------------|-------------|-------------|-------------|-------------|----------------|-------------|
| Adck1       | 202.8557891 | 1.13671302  | 0.253535975 | 4.483438767 | 7.34E-06       | 2.64E-05    |
| Chd3        | 2372.628421 | 1.136507437 | 0.220161162 | 5.162161324 | 2.44E-07       | 1.07E-06    |
| Aire        | 5.86955473  | 1.136193558 | 0.863086341 | 1.316430934 | 0.188029445    | 0.263460671 |
| Adra1d      | 0.814873278 | 1.136129326 | 2.716699262 | 0.418202096 | 0.675799363 NA |             |
| Gm15370     | 0.529801963 | 1.135785418 | 2.929193787 | 0.387746766 | 0.698203444 NA |             |
| Slc6a13     | 3628.771774 | 1.135758389 | 0.220569941 | 5.149198418 | 2.62E-07       | 1.14E-06    |
| Gm12106     | 5.558409581 | 1.135744733 | 0.785110187 | 1.446605524 | 0.148007438    | 0.215421396 |
| H2ac4       | 2.75798421  | 1.134810747 | 1.33831451  | 0.847940255 | 0.396471244    | 0.489324678 |
| Cyp2b19     | 2.642862841 | 1.134545021 | 1.156545564 | 0.980977366 | 0.326603903    | 0.418202144 |
| Fer1l6      | 3.359280488 | 1.13442928  | 1.070510613 | 1.059708579 | 0.289277199    | 0.378190006 |
| Gm7468      | 0.956787762 | 1.134093217 | 1.798441684 | 0.630597715 | 0.528303593 NA |             |
| Erp44       | 1336.085706 | 1.133776165 | 0.138719849 | 8.173135816 | 3.00E-16       | 3.45E-15    |
| Zfp534      | 1.701938807 | 1.13317348  | 1.675244249 | 0.676422844 | 0.498772217    | 0.58824412  |
| Zfp707      | 674.7180558 | 1.132308945 | 0.193234096 | 5.859778213 | 4.63E-09       | 2.49E-08    |
| Pdha1       | 1781.962747 | 1.132307082 | 0.157953302 | 7.16861923  | 7.58E-13       | 6.28E-12    |
| Hoxa10      | 0.787131972 | 1.131959724 | 2.403969568 | 0.47087107  | 0.637732808 NA |             |
| Hsbp11l     | 33.40281486 | 1.131574059 | 0.472572769 | 2.394496961 | 0.016643181    | 0.031913535 |
| Pex10       | 101.7299462 | 1.131420452 | 0.35390773  | 3.196936255 | 0.001388956    | 0.00340704  |
| Mipep       | 405.8453199 | 1.130842032 | 0.293234983 | 3.8564363   | 0.000115052    | 0.000344167 |
| Mea1        | 718.7843881 | 1.129630509 | 0.163643052 | 6.903015422 | 5.09E-12       | 3.86E-11    |
| Ube2a       | 455.881153  | 1.129539505 | 0.134324287 | 8.409048954 | 4.13E-17       | 5.17E-16    |
| Fmc1        | 373.4217618 | 1.128908551 | 0.154485904 | 7.307518179 | 2.72E-13       | 2.36E-12    |
| Gm16477     | 0.811741769 | 1.128600338 | 2.671422977 | 0.4224716   | 0.672680826 NA |             |
| Cars        | 578.1753623 | 1.128308251 | 0.232245988 | 4.858246476 | 1.18E-06       | 4.73E-06    |
| Mrp134      | 421.9939009 | 1.128060329 | 0.170500779 | 6.616159375 | 3.69E-11       | 2.53E-10    |
| Gm2308      | 0.529003382 | 1.127746881 | 2.929467917 | 0.384966456 | 0.700262268 NA |             |
| Mmd         | 2095.003925 | 1.127231725 | 0.163495656 | 6.894566836 | 5.40E-12       | 4.08E-11    |
| Olfr333-ps1 | 0.918767952 | 1.127216073 | 1.931445407 | 0.583612702 | 0.559480912 NA |             |
| Tmem59l     | 0.506268008 | 1.126473679 | 2.974835123 | 0.378667601 | 0.704934716 NA |             |
| Gm19131     | 0.505098584 | 1.1264007   | 2.976172503 | 0.378472921 | 0.705079306 NA |             |
| Kcnk4       | 0.522441658 | 1.126059959 | 2.942640101 | 0.382669956 | 0.701964493 NA |             |
| Ndfip1      | 1915.556602 | 1.125678833 | 0.144041438 | 7.814965229 | 5.50E-15       | 5.61E-14    |
| Nprl2       | 256.7926275 | 1.125608083 | 0.17760432  | 6.337729193 | 2.33E-10       | 1.46E-09    |
| Gm10182     | 10.03650934 | 1.125512885 | 1.496193992 | 0.752250638 | 0.451900347    | 0.542764345 |
| Smim13      | 325.2881356 | 1.124452076 | 0.216040671 | 5.204816627 | 1.94E-07       | 8.66E-07    |
| Dym         | 470.2693679 | 1.12438414  | 0.158595114 | 7.089651841 | 1.34E-12       | 1.08E-11    |
| Rasd2       | 2.441187137 | 1.124333335 | 1.330513237 | 0.845037316 | 0.398090005    | 0.490891126 |
| Ak3         | 5858.287883 | 1.123645081 | 0.171211457 | 6.562908219 | 5.28E-11       | 3.57E-10    |
| Dnaja1      | 3126.9368   | 1.123040706 | 0.180118074 | 6.235025072 | 4.52E-10       | 2.73E-09    |
| Slc25a23    | 3760.116001 | 1.12283147  | 0.157834544 | 7.113977955 | 1.13E-12       | 9.16E-12    |
| Tsc22d3     | 1862.258679 | 1.122752626 | 0.445521635 | 2.520085528 | 0.011732632    | 0.023426788 |
| Usp50       | 12.50333455 | 1.122417065 | 0.531938464 | 2.110050581 | 0.034853999    | 0.061415088 |
| Cyp2c70     | 6661.597098 | 1.121820302 | 0.232851095 | 4.817758332 | 1.45E-06       | 5.73E-06    |
| Gorasp1     | 522.8790701 | 1.121688152 | 0.318431735 | 3.522538828 | 0.000427434    | 0.001156284 |
| Cxcl13      | 15.69886985 | 1.121487877 | 0.847992293 | 1.322521309 | 0.185994618    | 0.261017143 |
| Dusp6       | 1171.946504 | 1.121039793 | 0.314651969 | 3.562792877 | 0.00036693     | 0.001005211 |
| Mrps35      | 523.2418555 | 1.120942084 | 0.228000724 | 4.916397044 | 8.82E-07       | 3.59E-06    |
| Ei24        | 2540.512008 | 1.12090669  | 0.181762825 | 6.166864374 | 6.97E-10       | 4.12E-09    |
| Cryz        | 1060.110085 | 1.119939068 | 0.165041327 | 6.785809866 | 1.15E-11       | 8.39E-11    |
| Prss42      | 0.521134646 | 1.119718305 | 2.516516344 | 0.444947758 | 0.656357508 NA |             |
| Ldah        | 571.7517526 | 1.119686714 | 0.191673786 | 5.84162673  | 5.17E-09       | 2.76E-08    |
| Selenok     | 1406.505584 | 1.1196531   | 0.186019458 | 6.019010646 | 1.75E-09       | 9.91E-09    |
| Gm2987      | 3.1148742   | 1.119206747 | 1.114086996 | 1.004595467 | 0.315091681    | 0.406330028 |
| Barx2       | 0.52828584  | 1.118779198 | 2.50607024  | 0.44642771  | 0.655288321 NA |             |
| Gm10709     | 0.482436542 | 1.118751629 | 3.085173573 | 0.362621941 | 0.716887318 NA |             |
| Vmn1r175    | 0.527456588 | 1.118621085 | 2.931931243 | 0.381530463 | 0.702809671 NA |             |
| Gm38247     | 2.239914365 | 1.118429556 | 1.335563939 | 0.8374212   | 0.402355853    | 0.495385161 |
| Slc24a5     | 4.996880638 | 1.118214735 | 1.102673043 | 1.01409456  | 0.310537633    | 0.401368125 |
| Suclg2      | 4282.898497 | 1.118032663 | 0.163272559 | 6.847645858 | 7.51E-12       | 5.58E-11    |
| Gcsh        | 1303.670044 | 1.117723151 | 0.162394247 | 6.882775528 | 5.87E-12       | 4.41E-11    |
| Olfr653     | 0.527302135 | 1.117522471 | 2.932169475 | 0.381124789 | 0.703110654 NA |             |
| Spata1      | 28.43979457 | 1.117259526 | 0.441179803 | 2.532435798 | 0.011327311    | 0.022718588 |
| Thap8       | 2.450242859 | 1.117220089 | 1.124017062 | 0.993952963 | 0.320245768    | 0.411544539 |
| Psm2        | 1492.281097 | 1.117004327 | 0.151486881 | 7.373604378 | 1.66E-13       | 1.47E-12    |
| Msx2        | 1.361533347 | 1.116845954 | 2.090436919 | 0.534264366 | 0.593158643 NA |             |
| Gm5239      | 0.274550318 | 1.115165691 | 3.644661048 | 0.305972401 | 0.75962566 NA  |             |

|               |             |             |             |             |             |             |
|---------------|-------------|-------------|-------------|-------------|-------------|-------------|
| Hacd3         | 2139.574246 | 1.114698029 | 0.175812843 | 6.3402537   | 2.29E-10    | 1.44E-09    |
| Lpcat2b       | 4.652605023 | 1.11451116  | 1.044419558 | 1.067110579 | 0.285921905 | 0.37429138  |
| Mrpl2         | 739.7589505 | 1.113867341 | 0.148622621 | 7.494601633 | 6.65E-14    | 6.11E-13    |
| Acadm         | 4369.117199 | 1.113714999 | 0.199015497 | 5.59612198  | 2.19E-08    | 1.09E-07    |
| Timm8a1       | 545.6745658 | 1.113646937 | 0.195026228 | 5.710241906 | 1.13E-08    | 5.80E-08    |
| Echdc3        | 1219.9174   | 1.113386713 | 0.209765191 | 5.307776318 | 1.11E-07    | 5.07E-07    |
| Nipsnap1      | 3613.961323 | 1.11322204  | 0.165981683 | 6.706896911 | 1.99E-11    | 1.41E-10    |
| Rhbdl1        | 71.24858366 | 1.113026021 | 0.278083832 | 4.002483753 | 6.27E-05    | 0.000195568 |
| Ctf2          | 3.868400552 | 1.112632117 | 1.119225884 | 0.994108636 | 0.320169982 | 0.411497779 |
| Polrmt        | 472.1939697 | 1.112491838 | 0.236579492 | 4.702401837 | 2.57E-06    | 9.81E-06    |
| Gm14849       | 1.327100045 | 1.112297593 | 1.741893108 | 0.638556745 | 0.523111328 | NA          |
| Srcin1        | 8.184606653 | 1.112159457 | 0.659725393 | 1.685791497 | 0.091835966 | 0.143661181 |
| Ireb2         | 1339.730322 | 1.1120889   | 0.140466037 | 7.917137276 | 2.43E-15    | 2.56E-14    |
| Cwc15         | 888.0743779 | 1.111987589 | 0.153467413 | 7.245757037 | 4.30E-13    | 3.65E-12    |
| Amy2a2        | 0.827804175 | 1.111503019 | 2.355350819 | 0.471905506 | 0.636994238 | NA          |
| Amy2a3        | 0.827804175 | 1.111503019 | 2.355350819 | 0.471905506 | 0.636994238 | NA          |
| Amy2a4        | 0.827804175 | 1.111503019 | 2.355350819 | 0.471905506 | 0.636994238 | NA          |
| Atxn1         | 423.1191905 | 1.111300139 | 0.307364433 | 3.615578184 | 0.000299678 | 0.00083207  |
| Got2          | 7450.533834 | 1.110653994 | 0.159096373 | 6.981013901 | 2.93E-12    | 2.27E-11    |
| Olfr1268-ps1  | 1.209648311 | 1.110088859 | 1.610767723 | 0.689117893 | 0.490749081 | NA          |
| Ccdc40        | 4.737378383 | 1.109998244 | 1.14119366  | 0.972664223 | 0.330720212 | 0.422865809 |
| Acad10        | 379.9982863 | 1.109794416 | 0.246337816 | 4.505172748 | 6.63E-06    | 2.41E-05    |
| Gm5842        | 0.636991883 | 1.109619981 | 2.432121166 | 0.456235486 | 0.64822065  | NA          |
| 4930515G13Rik | 0.360960135 | 1.109587434 | 3.644630187 | 0.30444445  | 0.760789307 | NA          |
| C4b           | 24607.27313 | 1.109468397 | 0.261888522 | 4.236414751 | 2.27E-05    | 7.59E-05    |
| Gm42957       | 1.608119876 | 1.108415707 | 1.639543915 | 0.676051246 | 0.499008109 | NA          |
| Inpp5b        | 526.4746888 | 1.108029524 | 0.20090185  | 5.515277862 | 3.48E-08    | 1.69E-07    |
| Zpr1          | 917.6444616 | 1.107212331 | 0.176839003 | 6.261131934 | 3.82E-10    | 2.33E-09    |
| Gm44212       | 1.600745785 | 1.107099671 | 1.358706571 | 0.81481881  | 0.415176032 | NA          |
| Ubap1         | 647.9746074 | 1.106826745 | 0.193649192 | 5.71562799  | 1.09E-08    | 5.64E-08    |
| Gm5921        | 0.482727836 | 1.106444902 | 3.084589111 | 0.358700904 | 0.719818852 | NA          |
| Gnat1         | 80.10507419 | 1.106083013 | 0.487298079 | 2.269828386 | 0.023217998 | 0.042958587 |
| Gm19236       | 3.268707326 | 1.105214676 | 1.106122973 | 0.999178846 | 0.317708062 | 0.409208751 |
| Grk4          | 64.74067056 | 1.104909403 | 0.47291001  | 2.336405192 | 0.019470134 | 0.036701331 |
| Acadl         | 3111.02252  | 1.104741571 | 0.151180174 | 7.30745004  | 2.72E-13    | 2.36E-12    |
| Gm30584       | 0.28630505  | 1.104576783 | 3.6446025   | 0.303071949 | 0.761835031 | NA          |
| Rmnd5a        | 1644.999631 | 1.104209548 | 0.165642738 | 6.66621164  | 2.62E-11    | 1.83E-10    |
| Gm15132       | 0.274098187 | 1.103812276 | 3.644598278 | 0.302862536 | 0.761994623 | NA          |
| Aco1          | 3234.044049 | 1.102857107 | 0.158813966 | 6.944333257 | 3.80E-12    | 2.91E-11    |
| Tmem80        | 197.9835434 | 1.102791199 | 0.212799594 | 5.182299359 | 2.19E-07    | 9.67E-07    |
| Ddrgk1        | 1851.563333 | 1.102660881 | 0.110505604 | 9.978325438 | 1.90E-23    | 3.96E-22    |
| Tsk           | 0.350063654 | 1.10242534  | 3.644590621 | 0.302482626 | 0.762284176 | NA          |
| Larp1b        | 970.7046586 | 1.102411553 | 0.217050749 | 5.079049761 | 3.79E-07    | 1.62E-06    |
| Lman2         | 2683.854926 | 1.102186666 | 0.219480039 | 5.021808234 | 5.12E-07    | 2.14E-06    |
| Gm7219        | 0.286254077 | 1.10205059  | 3.644588552 | 0.302379974 | 0.762362419 | NA          |
| Gm2011        | 98.96677151 | 1.101624756 | 0.29697995  | 3.709424674 | 0.000207731 | 0.000594792 |
| Trav21-dv12   | 0.286242748 | 1.10147052  | 3.64458535  | 0.30222108  | 0.762483536 | NA          |
| Gm15371       | 0.274011042 | 1.101462776 | 3.644585308 | 0.302218959 | 0.762485153 | NA          |
| Lysmd1        | 176.8439564 | 1.101439998 | 0.266610221 | 4.131274459 | 3.61E-05    | 0.000117057 |
| Xlr4a         | 14.98152536 | 1.10095855  | 0.919338511 | 1.197555129 | 0.231090253 | 0.313489826 |
| Gm15526       | 0.372981977 | 1.100838724 | 3.644581864 | 0.302048017 | 0.762615459 | NA          |
| Timm17b       | 492.1601361 | 1.100717335 | 0.190870568 | 5.766825907 | 8.08E-09    | 4.23E-08    |
| Dcaf12l1      | 43.66417855 | 1.100381221 | 0.401375745 | 2.741523958 | 0.00611549  | 0.013035368 |
| Gm13981       | 0.286213926 | 1.099961182 | 3.644577022 | 0.301807638 | 0.762798708 | NA          |
| Mrpl12        | 1526.342229 | 1.099860015 | 0.172005264 | 6.394339287 | 1.61E-10    | 1.03E-09    |
| Kremen2       | 2.782580121 | 1.099849181 | 1.607560138 | 0.684172962 | 0.493865954 | 0.58369887  |
| Kdm1b         | 383.5422713 | 1.099692892 | 0.21722824  | 5.062384577 | 4.14E-07    | 1.75E-06    |
| Gm48445       | 0.263013349 | 1.09960892  | 3.644575079 | 0.301711145 | 0.762872271 | NA          |
| Gm48815       | 0.286206081 | 1.099541569 | 3.644574707 | 0.301692696 | 0.762886337 | NA          |
| Gm47803       | 0.372810698 | 1.09945044  | 3.644574204 | 0.301667734 | 0.762905368 | NA          |
| Gm5372        | 0.28722057  | 1.099233037 | 3.644573005 | 0.301608182 | 0.76295077  | NA          |
| Uxt           | 263.0028289 | 1.099045905 | 0.16964812  | 6.478385409 | 9.27E-11    | 6.08E-10    |
| Rlf           | 386.9512834 | 1.098880733 | 0.152191788 | 7.220368086 | 5.18E-13    | 4.36E-12    |
| Abca4         | 22.88286326 | 1.098494499 | 0.568988906 | 1.930607939 | 0.053531555 | 0.089493248 |
| Gm2767        | 2.32966045  | 1.098382521 | 1.218143346 | 0.90168577  | 0.367223814 | 0.459649896 |
| 2210016F16Rik | 504.8861262 | 1.098346385 | 0.239205051 | 4.591652134 | 4.40E-06    | 1.63E-05    |

|               |             |             |             |             |             |    |             |
|---------------|-------------|-------------|-------------|-------------|-------------|----|-------------|
| Anp32-ps      | 0.279023843 | 1.098337506 | 3.644568066 | 0.301362874 | 0.763137802 | NA |             |
| H2bu1-ps      | 0.279020933 | 1.09822861  | 3.644567465 | 0.301333044 | 0.763160545 | NA |             |
| Gm4907        | 0.272875399 | 1.098219574 | 3.644567415 | 0.301330569 | 0.763162433 | NA |             |
| Slc22a18      | 1595.368187 | 1.097982632 | 0.299749179 | 3.663004638 | 0.000249274 |    | 0.000703231 |
| Vmn2r55       | 0.96801375  | 1.097655105 | 1.799368393 | 0.610022444 | 0.54184694  | NA |             |
| Tubb4b-ps1    | 0.359271331 | 1.097626768 | 3.644564146 | 0.301168185 | 0.763286249 | NA |             |
| Gm5206        | 0.28617103  | 1.097616379 | 3.644564089 | 0.301165339 | 0.763288419 | NA |             |
| Prkar2a       | 937.6005033 | 1.097585366 | 0.152335965 | 7.205031097 | 5.80E-13    |    | 4.87E-12    |
| Gm13511       | 0.365410621 | 1.097547178 | 3.644563707 | 0.301146383 | 0.763302873 | NA |             |
| Gm15773       | 0.272844373 | 1.097304913 | 3.644562372 | 0.30108002  | 0.763353476 | NA |             |
| Gm48551       | 17.992919   | 1.097181807 | 0.470334132 | 2.332770967 | 0.019660169 |    | 0.037026797 |
| Lrrc46        | 19.99477866 | 1.097153857 | 0.523460175 | 2.095964333 | 0.036085355 |    | 0.063313901 |
| Rpl35a-ps7    | 0.262891034 | 1.096955364 | 3.644560444 | 0.30098427  | 0.76342649  | NA |             |
| Olfr1315-ps1  | 0.359162217 | 1.096835277 | 3.644559782 | 0.300951375 | 0.763451574 | NA |             |
| Acr           | 1.750654983 | 1.096743615 | 1.455951235 | 0.753283207 | 0.451279748 |    | 0.542286399 |
| Gm13771       | 0.263887092 | 1.096498383 | 3.644557925 | 0.300859091 | 0.763521947 | NA |             |
| Gm43106       | 0.278971539 | 1.096351555 | 3.644557115 | 0.30081887  | 0.763552618 | NA |             |
| Gm12350       | 0.262862405 | 1.096325705 | 3.644556973 | 0.300811789 | 0.763558018 | NA |             |
| Gal           | 0.37242479  | 1.096290921 | 3.644556781 | 0.300802261 | 0.763565284 | NA |             |
| Gm47726       | 0.349123412 | 1.096194414 | 3.644556249 | 0.300775825 | 0.763585444 | NA |             |
| Ppp1r2-ps6    | 0.36523055  | 1.096164571 | 3.644556085 | 0.30076765  | 0.763591678 | NA |             |
| Gm15443       | 30.20231776 | 1.096149912 | 0.387330299 | 2.830013337 | 0.004654606 |    | 0.010190282 |
| Gm5762        | 0.278965944 | 1.096135452 | 3.644555924 | 0.300759674 | 0.763597761 | NA |             |
| Gm4482        | 0.372401973 | 1.096102717 | 3.644555744 | 0.300750707 | 0.763604599 | NA |             |
| C030005K15Rik | 0.359054531 | 1.096051803 | 3.644555463 | 0.30073676  | 0.763615235 | NA |             |
| Gm7327        | 0.36520168  | 1.09594218  | 3.644554859 | 0.300706732 | 0.763638135 | NA |             |
| A830005F24Rik | 0.372372506 | 1.095859417 | 3.644554403 | 0.300684061 | 0.763655424 | NA |             |
| Gm49483       | 0.263851031 | 1.095722698 | 3.644553649 | 0.30064661  | 0.763683985 | NA |             |
| Edem1         | 2113.815327 | 1.095666428 | 0.204567552 | 5.356012814 | 8.51E-08    |    | 3.94E-07    |
| Gm11253       | 0.349043881 | 1.095661289 | 3.644553311 | 0.300629788 | 0.763696814 | NA |             |
| Gm5844        | 0.272787587 | 1.095604793 | 3.644552999 | 0.300614312 | 0.763708616 | NA |             |
| Try5          | 0.278950024 | 1.095516506 | 3.644552513 | 0.300590128 | 0.76372706  | NA |             |
| LO018689.2    | 0.262816503 | 1.09530911  | 3.64455137  | 0.300533316 | 0.763770387 | NA |             |
| Gm14111       | 0.286129974 | 1.095245001 | 3.644551016 | 0.300515755 | 0.763783781 | NA |             |
| Gm10608       | 0.279957844 | 1.095223987 | 3.6445509   | 0.300509999 | 0.763788171 | NA |             |
| Gm6341        | 0.26382378  | 1.095133223 | 3.6445504   | 0.300485136 | 0.763807133 | NA |             |
| Gm12783       | 0.263822773 | 1.095111373 | 3.64455028  | 0.300479151 | 0.763811697 | NA |             |
| Gm8277        | 0.262802706 | 1.09500181  | 3.644549676 | 0.300449138 | 0.763834587 | NA |             |
| Dpep2nb       | 0.286125418 | 1.094973176 | 3.644549518 | 0.300441295 | 0.763840569 | NA |             |
| Gm6187        | 0.27893456  | 1.094909407 | 3.644549167 | 0.300423827 | 0.763853892 | NA |             |
| Irx6          | 0.272764368 | 1.094899601 | 3.644549113 | 0.30042114  | 0.76385594  | NA |             |
| Gm13160       | 0.262794775 | 1.094824804 | 3.644548701 | 0.300400652 | 0.763871567 | NA |             |
| Mto1          | 238.1243835 | 1.094807665 | 0.210455754 | 5.202079974 | 1.97E-07    |    | 8.77E-07    |
| CR936839.1    | 0.262792922 | 1.094783422 | 3.644548472 | 0.300389316 | 0.763880212 | NA |             |
| Gm4291        | 0.262790491 | 1.094729097 | 3.644548173 | 0.300374435 | 0.763891562 | NA |             |
| 9430069107Rik | 0.348891616 | 1.094637897 | 3.644547671 | 0.300349452 | 0.763910616 | NA |             |
| Gm18761       | 0.278927147 | 1.094616269 | 3.644547551 | 0.300343528 | 0.763915135 | NA |             |
| Gm4959        | 0.287133192 | 1.094569253 | 3.644547292 | 0.300330649 | 0.763924957 | NA |             |
| Gm8526        | 0.263797654 | 1.094565325 | 3.644547271 | 0.300329573 | 0.763925778 | NA |             |
| Gm14810       | 0.263794635 | 1.094499533 | 3.644546908 | 0.300311551 | 0.763939524 | NA |             |
| Hoxd11        | 0.27376144  | 1.094373941 | 3.644546216 | 0.300277147 | 0.763965763 | NA |             |
| Gm17796       | 0.278920827 | 1.094365292 | 3.644546168 | 0.300274778 | 0.76396757  | NA |             |
| Epop          | 43.83186448 | 1.094336004 | 0.368981294 | 2.965830574 | 0.003018667 |    | 0.006881727 |
| Gm18734       | 0.262769284 | 1.094254086 | 3.644545556 | 0.300244316 | 0.763990804 | NA |             |
| Susd5         | 0.35879387  | 1.09414561  | 3.644544958 | 0.300214601 | 0.764013469 | NA |             |
| Gm9614        | 0.262761937 | 1.094089077 | 3.644544646 | 0.300199115 | 0.76402528  | NA |             |
| Gm16030       | 0.263771695 | 1.09399839  | 3.644544147 | 0.300174273 | 0.764044228 | NA |             |
| Prps11        | 0.372147311 | 1.093991288 | 3.644544108 | 0.300172328 | 0.764045712 | NA |             |
| Gip           | 0.263771141 | 1.093986263 | 3.64454408  | 0.300170951 | 0.764046762 | NA |             |
| Gm8873        | 0.287122736 | 1.093976406 | 3.644544026 | 0.300168251 | 0.764048821 | NA |             |
| Gm5485        | 0.263766561 | 1.093885958 | 3.644543527 | 0.300143475 | 0.764067719 | NA |             |
| Krt28         | 0.278908766 | 1.093883445 | 3.644543513 | 0.300142786 | 0.764068244 | NA |             |
| Gm38241       | 0.348777304 | 1.093867229 | 3.644543424 | 0.300138344 | 0.764071632 | NA |             |
| Yif1b         | 479.2603328 | 1.093850291 | 0.212512163 | 5.147236156 | 2.64E-07    |    | 1.15E-06    |
| Gm18192       | 0.348767351 | 1.093800032 | 3.644543054 | 0.300119937 | 0.764085672 | NA |             |
| Gm8174        | 0.348755174 | 1.093717798 | 3.644542601 | 0.300097411 | 0.764102854 | NA |             |

|            |             |             |             |             |             |    |             |
|------------|-------------|-------------|-------------|-------------|-------------|----|-------------|
| Serpina3a  | 0.262742188 | 1.093644335 | 3.644542196 | 0.300077287 | 0.764118204 | NA |             |
| Wfdc12     | 0.263751606 | 1.093557793 | 3.644541719 | 0.300053581 | 0.764136286 | NA |             |
| Svip       | 186.6455649 | 1.093551201 | 0.254064015 | 4.304234909 | 1.68E-05    |    | 5.71E-05    |
| Gm35013    | 0.263748095 | 1.093480623 | 3.644541294 | 0.300032441 | 0.76415241  | NA |             |
| Cyp4f37    | 0.372084762 | 1.093469607 | 3.644541234 | 0.300029424 | 0.764154712 | NA |             |
| Zp3        | 0.34871122  | 1.093420777 | 3.644540965 | 0.300016048 | 0.764164915 | NA |             |
| Olfr70     | 0.278896764 | 1.093400154 | 3.644540851 | 0.300010399 | 0.764169224 | NA |             |
| Grpr       | 0.364867713 | 1.093354636 | 3.6445406   | 0.29999793  | 0.764178735 | NA |             |
| Gm17816    | 0.28711176  | 1.093344954 | 3.644540547 | 0.299995278 | 0.764180757 | NA |             |
| Prss50     | 0.348699522 | 1.093341675 | 3.644540529 | 0.29999438  | 0.764181443 | NA |             |
| Impg1      | 0.286098544 | 1.093331008 | 3.64454047  | 0.299991458 | 0.764183672 | NA |             |
| Gm7191     | 0.2637409   | 1.093322318 | 3.644540422 | 0.299989077 | 0.764185487 | NA |             |
| Gapdh-ps14 | 0.263740464 | 1.093312731 | 3.644540369 | 0.299986451 | 0.76418749  | NA |             |
| Rgs22      | 0.262727164 | 1.093304863 | 3.644540326 | 0.299984296 | 0.764189135 | NA |             |
| Gpr179     | 0.358678714 | 1.093299038 | 3.644540294 | 0.2999827   | 0.764190352 | NA |             |
| Cpa4       | 0.364860151 | 1.09329573  | 3.644540276 | 0.299981794 | 0.764191043 | NA |             |
| Olfr105-ps | 0.286097673 | 1.093276636 | 3.64454017  | 0.299976563 | 0.764195033 | NA |             |
| Tcte1      | 0.27889355  | 1.09327012  | 3.644540135 | 0.299974779 | 0.764196394 | NA |             |
| Cldn34b2   | 0.263738002 | 1.093258515 | 3.644540071 | 0.2999716   | 0.764198819 | NA |             |
| Jakmip2    | 0.372059367 | 1.093257447 | 3.644540065 | 0.299971307 | 0.764199042 | NA |             |
| Zfp36l3    | 0.279906121 | 1.09325738  | 3.644540064 | 0.299971289 | 0.764199056 | NA |             |
| Gm8517     | 0.263734514 | 1.093181648 | 3.644539647 | 0.299950543 | 0.76421488  | NA |             |
| Piwil1     | 0.372049876 | 1.09317811  | 3.644539628 | 0.299949574 | 0.764215619 | NA |             |
| Olfr346    | 0.372048472 | 1.093166365 | 3.644539563 | 0.299946357 | 0.764218074 | NA |             |
| Gm18262    | 0.348671498 | 1.093152095 | 3.644539484 | 0.299942448 | 0.764221055 | NA |             |
| Umod1      | 0.286095394 | 1.093133929 | 3.644539384 | 0.299937472 | 0.764224851 | NA |             |
| Gm14538    | 0.263732141 | 1.09312932  | 3.644539359 | 0.299936209 | 0.764225814 | NA |             |
| Pgc        | 0.263731063 | 1.093105551 | 3.644539228 | 0.299929698 | 0.764230781 | NA |             |
| Olfr830    | 0.279902087 | 1.093101449 | 3.644539205 | 0.299928575 | 0.764231638 | NA |             |
| Fam131b    | 0.364832095 | 1.093077038 | 3.644539071 | 0.299921888 | 0.764236738 | NA |             |
| Nr2e1      | 0.279901418 | 1.093075542 | 3.644539063 | 0.299921478 | 0.764237051 | NA |             |
| Olfr933    | 0.278888601 | 1.093069297 | 3.644539028 | 0.299919767 | 0.764238356 | NA |             |
| Smok4a     | 0.348658769 | 1.09306594  | 3.64453901  | 0.299918848 | 0.764239057 | NA |             |
| Wfdc8      | 0.263728927 | 1.093058436 | 3.644538968 | 0.299916792 | 0.764240625 | NA |             |
| Gm18880    | 0.26372878  | 1.093055191 | 3.644538951 | 0.299915903 | 0.764241303 | NA |             |
| Olfr661    | 0.27990065  | 1.093045782 | 3.644538899 | 0.299913326 | 0.764243269 | NA |             |
| Gdap1      | 0.27990019  | 1.093027983 | 3.644538801 | 0.29990845  | 0.764246989 | NA |             |
| Btnl7-ps   | 0.263726246 | 1.092999246 | 3.644538642 | 0.299900578 | 0.764252993 | NA |             |
| Ptpn20     | 0.262713592 | 1.09299736  | 3.644538632 | 0.299900061 | 0.764253387 | NA |             |
| Psg29      | 0.287105358 | 1.092972192 | 3.644538493 | 0.299893167 | 0.764258646 | NA |             |
| Cel        | 0.263723762 | 1.092944415 | 3.64453834  | 0.299885558 | 0.764264451 | NA |             |
| Olfr685    | 0.263718865 | 1.092836204 | 3.644537744 | 0.299855916 | 0.764287062 | NA |             |
| Pou4f2     | 0.263718797 | 1.092834689 | 3.644537736 | 0.299855501 | 0.764287378 | NA |             |
| Olfr827    | 0.279894733 | 1.092816151 | 3.644537634 | 0.299850423 | 0.764291252 | NA |             |
| Cox16      | 572.0100689 | 1.092770397 | 0.169859566 | 6.433375673 | 1.25E-10    |    | 8.06E-10    |
| Otof       | 0.263714275 | 1.09273468  | 3.644537185 | 0.299828106 | 0.764308276 | NA |             |
| Gm16128    | 0.682312246 | 1.09253034  | 2.160246391 | 5.05743393  | 0.613036801 | NA |             |
| Irf2       | 1027.413223 | 1.092435442 | 0.159551549 | 6.846912159 | 7.55E-12    |    | 5.60E-11    |
| Mocos      | 728.5464189 | 1.09194269  | 0.247646224 | 4.409284628 | 1.04E-05    |    | 3.65E-05    |
| Fbxw19     | 4.024770796 | 1.091842808 | 0.961285116 | 1.135815785 | 0.256033669 |    | 0.34095157  |
| Syt1       | 205.1034925 | 1.091544918 | 0.432161484 | 2.525780196 | 0.011544168 |    | 0.02311817  |
| Znhit1     | 599.6902803 | 1.091459096 | 0.147272533 | 7.41115179  | 1.25E-13    |    | 1.12E-12    |
| Il15ra     | 782.3375273 | 1.091123216 | 0.231265139 | 4.718061783 | 2.38E-06    |    | 9.11E-06    |
| Ipmk       | 853.1526629 | 1.090980449 | 0.165853568 | 6.577973953 | 4.77E-11    |    | 3.24E-10    |
| Xiap       | 1561.362375 | 1.090870814 | 0.204698397 | 5.32916148  | 9.87E-08    |    | 4.53E-07    |
| Rdh14      | 361.2496856 | 1.090731607 | 0.151904757 | 7.180365065 | 6.95E-13    |    | 5.80E-12    |
| Gm10985    | 0.952193307 | 1.090646883 | 2.665931251 | 0.409105404 | 0.68246231  | NA |             |
| Smlr1      | 490.0336461 | 1.09034129  | 0.214076533 | 5.093231254 | 3.52E-07    |    | 1.51E-06    |
| Psm11      | 1765.556209 | 1.089992491 | 0.233113855 | 4.675794533 | 2.93E-06    |    | 1.11E-05    |
| Fhad1      | 35.66868587 | 1.08966037  | 0.431614385 | 2.52461551  | 0.011582493 |    | 0.023173142 |
| Serpina11  | 1066.508192 | 1.089573691 | 0.223647364 | 4.871837833 | 1.11E-06    |    | 4.44E-06    |
| Gm9985     | 1.746706862 | 1.088351635 | 1.651518309 | 0.659000648 | 0.509895353 |    | 0.599207002 |
| Ttc6       | 51.22032836 | 1.087778266 | 0.495153767 | 2.196849422 | 0.028031202 |    | 0.050681507 |
| Serpinf1   | 10650.24271 | 1.08765543  | 0.25790706  | 4.217237903 | 2.47E-05    |    | 8.22E-05    |
| Vmo1       | 66.33905751 | 1.087491619 | 0.318475692 | 3.414676997 | 0.000638577 |    | 0.00167381  |
| Fni1       | 508.1847708 | 1.087487048 | 0.136428088 | 7.971137509 | 1.57E-15    |    | 1.70E-14    |

|               |             |             |             |             |                |             |
|---------------|-------------|-------------|-------------|-------------|----------------|-------------|
| Rnf152        | 322.2881909 | 1.087316224 | 0.331011519 | 3.284828964 | 0.001020443    | 0.00256813  |
| 1110017D15Rik | 1.50868966  | 1.085913488 | 1.780053969 | 0.610045261 | 0.541831826 NA |             |
| Tc2n          | 46.80650182 | 1.084986268 | 0.412611276 | 2.629560391 | 0.008549535    | 0.017660543 |
| Sic9b1        | 0.705354137 | 1.084759096 | 2.417835277 | 0.448648883 | 0.653684965 NA |             |
| C730034F03Rik | 33.65934636 | 1.084605617 | 0.410219731 | 2.643962574 | 0.008194172    | 0.016984102 |
| Pmm2          | 932.6856762 | 1.084263227 | 0.19184365  | 5.651806694 | 1.59E-08       | 8.02E-08    |
| Gprin3        | 244.2997581 | 1.083983373 | 0.200467939 | 5.407265521 | 6.40E-08       | 3.01E-07    |
| Atp5mpl       | 1261.988008 | 1.083766665 | 0.18340421  | 5.909169959 | 3.44E-09       | 1.88E-08    |
| Msrb2         | 199.3055324 | 1.083705127 | 0.28288037  | 3.830966165 | 0.000127641    | 0.000378768 |
| Olfr1234      | 0.651581091 | 1.08368951  | 2.412375004 | 0.449220999 | 0.653272241 NA |             |
| Pdhx          | 398.563077  | 1.083017407 | 0.175351409 | 6.17626864  | 6.56E-10       | 3.89E-09    |
| Olfr313       | 2.334828603 | 1.082898478 | 1.095147817 | 0.9888149   | 0.322753713    | 0.414080772 |
| Olfr774       | 2.925884401 | 1.082888119 | 1.098077661 | 0.986167151 | 0.324051096    | 0.415370157 |
| Fam228a       | 11.73472713 | 1.082871699 | 0.678769732 | 1.595344705 | 0.110635174    | 0.168402539 |
| Prkd3         | 4575.794814 | 1.082862369 | 0.180106182 | 6.012355349 | 1.83E-09       | 1.03E-08    |
| Rps2-ps13     | 2.059379446 | 1.082810824 | 2.340478159 | 0.462645131 | 0.643618754    | 0.720149331 |
| Retn          | 0.698890157 | 1.08260571  | 2.156781506 | 0.501954281 | 0.615699681 NA |             |
| Ndufaf3       | 180.1705064 | 1.082599871 | 0.236544433 | 4.576729449 | 4.72E-06       | 1.75E-05    |
| Tmem126b      | 313.5766563 | 1.08225638  | 0.203559996 | 5.316645717 | 1.06E-07       | 4.84E-07    |
| Cdad1         | 574.3028764 | 1.082182449 | 0.166126261 | 6.514216593 | 7.31E-11       | 4.86E-10    |
| Mia2          | 4781.124772 | 1.081476074 | 0.26608655  | 4.064377073 | 4.82E-05       | 0.000152981 |
| Zfp973        | 48.91336277 | 1.081248663 | 0.2887121   | 3.745075678 | 0.000180339    | 0.000521708 |
| Gm5182        | 1.38667132  | 1.081248337 | 2.043164115 | 0.529202881 | 0.596664718 NA |             |
| Gm48386       | 2.778876856 | 1.080848403 | 1.085886166 | 0.99536069  | 0.31956087     | 0.411038087 |
| 1700008O03Rik | 3.091422279 | 1.080687592 | 1.344268079 | 0.803922677 | 0.421441633    | 0.513208303 |
| Stk11         | 1610.633019 | 1.080292721 | 0.147314794 | 7.333226321 | 2.25E-13       | 1.96E-12    |
| Tut7          | 1487.86245  | 1.078794743 | 0.136125723 | 7.924988185 | 2.28E-15       | 2.41E-14    |
| Gm8730        | 5.823138292 | 1.078688797 | 0.901415474 | 1.19666106  | 0.231438691    | 0.313837639 |
| Vkorc1        | 2231.155386 | 1.077392537 | 0.158956118 | 6.777924301 | 1.22E-11       | 8.84E-11    |
| Gm16332       | 329.7660772 | 1.077152701 | 0.189952197 | 5.67065146  | 1.42E-08       | 7.22E-08    |
| Echs1         | 2980.601248 | 1.076899254 | 0.137950049 | 7.806443444 | 5.88E-15       | 5.98E-14    |
| Atp5a1        | 12869.14176 | 1.076269523 | 0.106414948 | 10.11389417 | 4.79E-24       | 1.04E-22    |
| Lgals8        | 1633.059299 | 1.07591576  | 0.21396456  | 5.028476479 | 4.94E-07       | 2.07E-06    |
| Gm4045        | 8.945015968 | 1.075545505 | 0.638943453 | 1.683318767 | 0.092313399    | 0.144262428 |
| Tmem183a      | 1707.511839 | 1.07539902  | 0.189153211 | 5.685333136 | 1.31E-08       | 6.66E-08    |
| Olfr535       | 1.727467066 | 1.073734968 | 1.379221619 | 0.778507931 | 0.436269633    | 0.527739905 |
| Gdf1          | 1.099788695 | 1.073395284 | 2.577491705 | 0.416449559 | 0.67708107 NA  |             |
| Zadh2         | 976.2545509 | 1.072416125 | 0.178128405 | 6.020466685 | 1.74E-09       | 9.82E-09    |
| H2ac13        | 7.62214201  | 1.071839017 | 1.21776498  | 0.880169026 | 0.37876775     | 0.470815356 |
| Pnpla5        | 0.18317027  | 1.070584981 | 3.647795728 | 0.293488194 | 0.769149022 NA |             |
| Bend7         | 129.5904688 | 1.070326547 | 0.332877662 | 3.215375104 | 0.001302742    | 0.003215454 |
| Tbcel         | 1061.48169  | 1.070288102 | 0.118960046 | 8.997038405 | 2.32E-19       | 3.50E-18    |
| Pex19         | 1582.279863 | 1.069321524 | 0.195221373 | 5.47748184  | 4.31E-08       | 2.06E-07    |
| Gm17324       | 1.661314056 | 1.068588247 | 2.10378682  | 0.507935613 | 0.611498499    | 0.692377251 |
| Kxd1          | 535.7412628 | 1.068032158 | 0.144704096 | 7.380801146 | 1.57E-13       | 1.39E-12    |
| Amt           | 778.223853  | 1.067551854 | 0.311527175 | 3.426833798 | 0.000610663    | 0.00160558  |
| Aamdc         | 229.7482945 | 1.067132033 | 0.246872552 | 4.322602999 | 1.54E-05       | 5.29E-05    |
| Mrpl53        | 418.1562022 | 1.067127022 | 0.147757731 | 7.222140034 | 5.12E-13       | 4.31E-12    |
| Retreg2       | 1851.00766  | 1.066991551 | 0.219653171 | 4.857619604 | 1.19E-06       | 4.75E-06    |
| Fgg           | 52085.09219 | 1.066934465 | 0.386567365 | 2.760022084 | 0.005779745    | 0.012401901 |
| Hook3         | 1111.981791 | 1.066909679 | 0.204447462 | 5.21850292  | 1.80E-07       | 8.07E-07    |
| Psmb2         | 1175.861066 | 1.066574078 | 0.150601543 | 7.082092615 | 1.42E-12       | 1.14E-11    |
| Cs            | 2136.592047 | 1.066260931 | 0.151614871 | 7.032693605 | 2.03E-12       | 1.60E-11    |
| Myoz2         | 0.400517185 | 1.065823047 | 3.634504021 | 0.293251305 | 0.769330071 NA |             |
| Nos1          | 5.677916232 | 1.065455326 | 0.997233071 | 1.068411545 | 0.285334912    | 0.373637728 |
| H3c10         | 5.99402308  | 1.065330859 | 1.77643123  | 0.599702843 | 0.548704293    | 0.634276566 |
| Ndufa8        | 1486.183308 | 1.06474058  | 0.156781026 | 6.791259171 | 1.11E-11       | 8.11E-11    |
| Cped1         | 617.2009762 | 1.064654578 | 0.178429314 | 5.966814266 | 2.42E-09       | 1.34E-08    |
| Gm9443        | 0.835552029 | 1.064169045 | 2.712379788 | 0.392337773 | 0.694808658 NA |             |
| Bloc1s1       | 930.849136  | 1.06394439  | 0.158073661 | 6.730687356 | 1.69E-11       | 1.20E-10    |
| Pradc1        | 102.2298561 | 1.062950579 | 0.280161939 | 3.794057766 | 0.000148205    | 0.000435546 |
| Cox18         | 161.0515265 | 1.062751081 | 0.176019829 | 6.037678188 | 1.56E-09       | 8.87E-09    |
| Plekha6       | 1206.091205 | 1.062567409 | 0.18812078  | 5.648325542 | 1.62E-08       | 8.18E-08    |
| Ogfd2         | 356.6665753 | 1.062379784 | 0.257566911 | 4.124674936 | 3.71E-05       | 0.000120099 |
| Zscan26       | 1240.297353 | 1.062200474 | 0.153260109 | 6.930704168 | 4.19E-12       | 3.20E-11    |
| Gbf1          | 995.4311042 | 1.062163158 | 0.184356847 | 5.761452193 | 8.34E-09       | 4.36E-08    |



|               |             |             |             |             |                |             |
|---------------|-------------|-------------|-------------|-------------|----------------|-------------|
| Rpl17-ps3     | 4.292981383 | 1.061450846 | 3.373054202 | 0.314685381 | 0.753000545    | 0.811502199 |
| Ndn           | 7.773668278 | 1.061252788 | 0.721394057 | 1.471113849 | 0.14126033     | 0.206748464 |
| Efna1         | 1339.096413 | 1.061152214 | 0.289627099 | 3.663856789 | 0.000248446    | 0.00070101  |
| Tmprss6       | 5571.750595 | 1.061060655 | 0.136497783 | 7.773464387 | 7.64E-15       | 7.69E-14    |
| B330016D10Rik | 36.10698673 | 1.060928013 | 0.42233254  | 2.512067893 | 0.012002599    | 0.023884711 |
| Ubr3          | 1490.133527 | 1.060780794 | 0.150130818 | 7.065709827 | 1.60E-12       | 1.28E-11    |
| Foxred1       | 617.9798673 | 1.060483513 | 0.231713712 | 4.576697272 | 4.72E-06       | 1.75E-05    |
| Six2          | 3.425346911 | 1.060249606 | 1.034489027 | 1.024901743 | 0.305409552    | 0.395579855 |
| Ssbp3         | 898.4169046 | 1.06009701  | 0.185500803 | 5.714783925 | 1.10E-08       | 5.66E-08    |
| Plpbp         | 1139.584274 | 1.059619213 | 0.113417124 | 9.342673968 | 9.39E-21       | 1.60E-19    |
| Gm48132       | 319.0302909 | 1.059555833 | 0.143361734 | 7.390785539 | 1.46E-13       | 1.30E-12    |
| Pank3         | 846.4337484 | 1.059166138 | 0.129991789 | 8.147946448 | 3.70E-16       | 4.22E-15    |
| Olfr1341      | 2.744253473 | 1.058852213 | 1.118393598 | 0.94676169  | 0.343760227    | 0.436108376 |
| Rfesd         | 179.4885697 | 1.058520099 | 0.22535303  | 4.697163815 | 2.64E-06       | 1.01E-05    |
| Mrps15        | 492.5184747 | 1.058277232 | 0.16706626  | 6.33447611  | 2.38E-10       | 1.49E-09    |
| Gm9973        | 50.26489693 | 1.058272057 | 0.390802577 | 2.707945439 | 0.006770115    | 0.014281902 |
| Olfr1280      | 129.1772597 | 1.058208298 | 0.356773403 | 2.966051531 | 0.003016499    | 0.006878716 |
| Gemin2        | 196.9422711 | 1.058144406 | 0.257179011 | 4.114427537 | 3.88E-05       | 0.000125157 |
| Rpf1          | 375.9560878 | 1.057990843 | 0.134102289 | 7.889431652 | 3.04E-15       | 3.17E-14    |
| Hook1         | 700.326138  | 1.057639312 | 0.177395078 | 5.962055563 | 2.49E-09       | 1.38E-08    |
| Gm19716       | 1.124539383 | 1.057313427 | 1.796018535 | 0.588698505 | 0.556063541 NA |             |
| Abat          | 4667.896756 | 1.056514655 | 0.239401417 | 4.413151228 | 1.02E-05       | 3.60E-05    |
| Vmn1r26       | 13.19358643 | 1.055736729 | 0.643745644 | 1.639990483 | 0.101007146    | 0.155679398 |
| Pcna-ps2      | 1.387764441 | 1.055680112 | 1.780946941 | 0.592763371 | 0.553339525 NA |             |
| Snrpd3        | 843.0459188 | 1.055594799 | 0.229196817 | 4.605625907 | 4.11E-06       | 1.53E-05    |
| Ptges         | 11.01328959 | 1.055396258 | 0.747747458 | 1.411434098 | 0.158116655    | 0.227635198 |
| Ceacam18      | 1.386924718 | 1.055093525 | 1.800874959 | 0.585878281 | 0.557957314 NA |             |
| Sdhaf3        | 133.4836648 | 1.054753546 | 0.228880507 | 4.608315308 | 4.06E-06       | 1.51E-05    |
| L1td1         | 4.310807387 | 1.054631012 | 1.281831873 | 0.822752995 | 0.410648472    | 0.50296078  |
| Gm6652        | 1.112381347 | 1.054306537 | 1.896657543 | 0.555876068 | 0.57829558 NA  |             |
| Nfyb          | 486.3943442 | 1.053546685 | 0.182407478 | 5.77578671  | 7.66E-09       | 4.02E-08    |
| Hlf           | 588.1305249 | 1.05332005  | 0.425275843 | 2.476792574 | 0.013256892    | 0.026064294 |
| Gm10038       | 8.922697435 | 1.053100005 | 0.665154805 | 1.583240468 | 0.113366666    | 0.171946167 |
| Vmn1r57       | 2.066512434 | 1.053055576 | 1.692567324 | 0.622164661 | 0.5338336      | 0.621231286 |
| Dnah8         | 7.10249371  | 1.051770889 | 0.733040911 | 1.43480517  | 0.151342624    | 0.219563361 |
| Gm49430       | 1.587636052 | 1.051622548 | 1.552349273 | 0.677439392 | 0.498127212 NA |             |
| Acad12        | 181.6095219 | 1.051509956 | 0.26629832  | 3.948616552 | 7.86E-05       | 0.000241972 |
| Nfu1          | 517.5743331 | 1.051497242 | 0.127131504 | 8.270941572 | 1.33E-16       | 1.58E-15    |
| D2hgdh        | 529.4426746 | 1.051111071 | 0.150159701 | 6.999954461 | 2.56E-12       | 2.00E-11    |
| Scgb1c1       | 1.630670716 | 1.050884218 | 1.480759295 | 0.709692805 | 0.477894655 NA |             |
| 9430038101Rik | 95.44066851 | 1.050447203 | 0.250552814 | 4.19251809  | 2.76E-05       | 9.09E-05    |
| Grk1          | 52.29522873 | 1.050353786 | 0.282472761 | 3.718425033 | 0.000200469    | 0.00057574  |
| Tmem134       | 884.2599069 | 1.050073999 | 0.149782388 | 7.010664026 | 2.37E-12       | 1.86E-11    |
| Akr1c20       | 1174.720987 | 1.049782184 | 0.345431331 | 3.039047392 | 0.002373275    | 0.005528778 |
| Fgf5          | 1.381718207 | 1.049138946 | 1.563662923 | 0.670949557 | 0.502252665 NA |             |
| Ythdf3        | 1181.414013 | 1.049117256 | 0.161314649 | 6.503546116 | 7.84E-11       | 5.20E-10    |
| Zdhxc6        | 1094.181281 | 1.04903446  | 0.118317056 | 8.866299519 | 7.56E-19       | 1.10E-17    |
| Taldo1        | 2227.743418 | 1.048977277 | 0.173443839 | 6.047936212 | 1.47E-09       | 8.36E-09    |
| Nudt8         | 276.7591201 | 1.048554298 | 0.158360311 | 6.621320034 | 3.56E-11       | 2.44E-10    |
| Tmem238       | 333.3992354 | 1.047445626 | 0.258230107 | 4.056249058 | 4.99E-05       | 0.000158017 |
| Naprt         | 1519.516852 | 1.046825108 | 0.192202046 | 5.44648266  | 5.14E-08       | 2.44E-07    |
| Rab24         | 637.1938772 | 1.046458311 | 0.169118519 | 6.187721572 | 6.10E-10       | 3.64E-09    |
| Hbq1b         | 1.057065121 | 1.046364853 | 2.247642588 | 0.465538809 | 0.641545652 NA |             |
| Rnf115        | 451.4785056 | 1.046286542 | 0.190757572 | 5.484901757 | 4.14E-08       | 1.99E-07    |
| Ndufs6b       | 1.587856988 | 1.046115677 | 1.443222238 | 0.724847255 | 0.468545742 NA |             |
| Golim4        | 960.4835049 | 1.045095697 | 0.243957121 | 4.283931919 | 1.84E-05       | 6.22E-05    |
| Rps15a-ps6    | 0.805529059 | 1.044904206 | 2.248753632 | 0.464659263 | 0.642175485 NA |             |
| Bglap3        | 18.66528275 | 1.044838097 | 0.629462195 | 1.659890148 | 0.096936554    | 0.150357053 |
| Ddah1         | 2325.977937 | 1.044776481 | 0.350776605 | 2.978466828 | 0.002896944    | 0.006629141 |
| Afm           | 3363.003413 | 1.043312137 | 0.266589133 | 3.913558387 | 9.09E-05       | 0.000276865 |
| Olfr1295      | 1.056813286 | 1.043134657 | 2.101945792 | 0.49627096  | 0.619703252 NA |             |
| Pnpla7        | 1952.277053 | 1.042738597 | 0.256465116 | 4.065810644 | 4.79E-05       | 0.000152157 |
| 4930523C07Rik | 145.3191594 | 1.04215936  | 0.326198993 | 3.194857686 | 0.001398998    | 0.003427726 |
| Kif1b         | 1718.513068 | 1.042067154 | 0.205105242 | 5.080646127 | 3.76E-07       | 1.60E-06    |
| Pde8a         | 507.2707762 | 1.041615618 | 0.257944459 | 4.038139149 | 5.39E-05       | 0.000169777 |
| Frg2f1        | 87.95881533 | 1.041615429 | 0.332433025 | 3.133309122 | 0.001728473    | 0.004142314 |

|               |             |             |             |             |                |             |
|---------------|-------------|-------------|-------------|-------------|----------------|-------------|
| Smim1         | 93.64658256 | 1.041597443 | 0.341235564 | 3.052429331 | 0.002269972    | 0.005308433 |
| Dlst          | 2576.998292 | 1.041318582 | 0.179449967 | 5.802835177 | 6.52E-09       | 3.45E-08    |
| Polr2i        | 302.1497867 | 1.041293147 | 0.172930589 | 6.021451449 | 1.73E-09       | 9.77E-09    |
| Pex3          | 373.2646391 | 1.041281595 | 0.142523716 | 7.30602336  | 2.75E-13       | 2.38E-12    |
| Daglb         | 415.4707548 | 1.040768268 | 0.145573065 | 7.149456323 | 8.71E-13       | 7.18E-12    |
| Gm10382       | 3.572430775 | 1.040112369 | 1.248649099 | 0.832990124 | 0.404850299    | 0.497684446 |
| Gpr37         | 50.63812382 | 1.040035696 | 0.277960024 | 3.741673645 | 0.000182799    | 0.000528285 |
| Plekha8       | 406.6558181 | 1.039628503 | 0.186286165 | 5.580814345 | 2.39E-08       | 1.19E-07    |
| Olfr12        | 5.736187303 | 1.039579787 | 0.82317517  | 1.262890118 | 0.206628672    | 0.285208129 |
| Rbks          | 178.1320854 | 1.039436238 | 0.241440628 | 4.305142201 | 1.67E-05       | 5.69E-05    |
| Tmem126a      | 520.2123395 | 1.039255561 | 0.197462707 | 5.263047267 | 1.42E-07       | 6.39E-07    |
| Timm23        | 1615.793893 | 1.038802756 | 0.129737383 | 8.006965522 | 1.18E-15       | 1.29E-14    |
| Gm9442        | 2.968289638 | 1.038708053 | 1.183299783 | 0.877806341 | 0.380048823    | 0.472002994 |
| Snrnp48       | 561.0841093 | 1.038511983 | 0.249823336 | 4.156985488 | 3.22E-05       | 0.000105236 |
| Zkscan7       | 318.2863118 | 1.038447779 | 0.227688538 | 4.560825881 | 5.10E-06       | 1.87E-05    |
| Aup1          | 2709.200491 | 1.037898765 | 0.116478647 | 8.910635463 | 5.07E-19       | 7.44E-18    |
| Enpep         | 673.765805  | 1.037100887 | 0.296452645 | 3.498369489 | 0.000468112    | 0.001257148 |
| Trarg1        | 3.633673019 | 1.036659982 | 0.881007947 | 1.17667495  | 0.23932527     | 0.322735105 |
| Gm10643       | 18.86729958 | 1.036594691 | 0.493884135 | 2.098862098 | 0.035829059    | 0.062912122 |
| Slc12a5       | 40.19058961 | 1.036398361 | 0.459354948 | 2.25620376  | 0.024057873    | 0.044286645 |
| Gm37988       | 4.198392004 | 1.036302853 | 1.267745659 | 0.817437509 | 0.413678448    | 0.505946637 |
| Klhl2         | 568.4777049 | 1.03623339  | 0.165188472 | 6.273036944 | 3.54E-10       | 2.17E-09    |
| Adcy9         | 156.4407006 | 1.035868344 | 0.32391779  | 3.197935942 | 0.00138415     | 0.003396228 |
| Bccip         | 1104.852984 | 1.035636691 | 0.119586332 | 8.660159367 | 4.71E-18       | 6.39E-17    |
| Zfp457        | 10.95146476 | 1.035456598 | 0.552338912 | 1.874676173 | 0.060837287    | 0.100014857 |
| Hoxc8         | 5.056404464 | 1.035414608 | 0.82201591  | 1.259604096 | 0.207812217    | 0.286354888 |
| 1700028J19Rik | 5.349839694 | 1.03458945  | 0.766810221 | 1.349211867 | 0.177268924    | 0.250691051 |
| Olfr1205      | 3.191086807 | 1.034114805 | 0.963637052 | 1.073137239 | 0.283209545    | 0.371168229 |
| Pex13         | 734.2029395 | 1.033706446 | 0.210330764 | 4.914670721 | 8.89E-07       | 3.61E-06    |
| Dand5         | 42.96753601 | 1.033441307 | 0.281807679 | 3.667186473 | 0.000245234    | 0.00069321  |
| Cyp26b1       | 19.54937254 | 1.032380414 | 0.492734871 | 2.095204694 | 0.0361528      | 0.063408739 |
| Ptdss1        | 536.8567354 | 1.03182574  | 0.180484923 | 5.716963633 | 1.08E-08       | 5.60E-08    |
| Sirt4         | 195.1902492 | 1.03182388  | 0.321819583 | 3.206218432 | 0.001344919    | 0.003307107 |
| Snrpn         | 167.8808365 | 1.031778604 | 0.431862328 | 2.38913778  | 0.016887968    | 0.032319945 |
| Atp23         | 90.84934131 | 1.031548225 | 0.253737491 | 4.065415097 | 4.79E-05       | 0.000152387 |
| Olfr484       | 4.504589307 | 1.031391458 | 1.105270225 | 0.933157733 | 0.350738534    | 0.443081921 |
| Sfxn5         | 400.1785269 | 1.030683744 | 0.200211219 | 5.147981962 | 2.63E-07       | 1.15E-06    |
| Xkr6          | 44.98824886 | 1.030587444 | 0.314202327 | 3.280012132 | 0.001038026    | 0.002607378 |
| Lgr4          | 937.2451749 | 1.030530904 | 0.198898344 | 5.181193991 | 2.20E-07       | 9.71E-07    |
| Crybg3        | 154.5154523 | 1.030324785 | 0.220070152 | 4.681801581 | 2.84E-06       | 1.08E-05    |
| Trit1         | 240.2553045 | 1.030282339 | 0.17668812  | 5.831078715 | 5.51E-09       | 2.93E-08    |
| Ndufs2        | 3345.106005 | 1.029762563 | 0.140520167 | 7.328219061 | 2.33E-13       | 2.03E-12    |
| Mrpl22        | 397.622467  | 1.029665954 | 0.129878192 | 7.927935708 | 2.23E-15       | 2.36E-14    |
| Olfr853       | 3.269943943 | 1.028755441 | 1.149057892 | 0.895303403 | 0.370624922    | 0.462785737 |
| Dnajc15       | 432.4750859 | 1.028208703 | 0.228046619 | 4.508765384 | 6.52E-06       | 2.37E-05    |
| Abcb8         | 644.9376022 | 1.027785693 | 0.283881041 | 3.620480217 | 0.000294057    | 0.000818061 |
| Tefm          | 178.8615222 | 1.027292511 | 0.214420001 | 4.79102932  | 1.66E-06       | 6.49E-06    |
| Stpg3         | 0.256856682 | 1.026959535 | 3.63943582  | 0.282175476 | 0.777808962 NA |             |
| Cabp2         | 2.089856563 | 1.026951898 | 1.650165436 | 0.622332692 | 0.533723129    | 0.62120983  |
| Ece1          | 2548.623431 | 1.02680871  | 0.287244379 | 3.574686874 | 0.000350647    | 0.000962614 |
| Trappc3       | 577.4285028 | 1.026797381 | 0.116456657 | 8.816991717 | 1.18E-18       | 1.69E-17    |
| Agtpbp1       | 199.1164701 | 1.026388323 | 0.297979387 | 3.444494372 | 0.000572129    | 0.001513132 |
| Olfr77        | 11.48867429 | 1.026108256 | 0.611368736 | 1.678378686 | 0.093273196    | 0.145482291 |
| Atp5g2        | 229.9216751 | 1.025782394 | 0.197198597 | 5.201773293 | 1.97E-07       | 8.79E-07    |
| Ly6h          | 13.21505906 | 1.025759807 | 0.727195134 | 1.410570229 | 0.158371375    | 0.22782172  |
| Zfp93         | 72.71432398 | 1.025743247 | 0.425736909 | 2.409335969 | 0.015981578    | 0.030820582 |
| Gm18300       | 1.136292194 | 1.025316101 | 1.967230075 | 0.521197858 | 0.602228946 NA |             |
| Tars          | 1658.012082 | 1.025314214 | 0.214411438 | 4.781994017 | 1.74E-06       | 6.77E-06    |
| Lypla2        | 1020.978586 | 1.025305194 | 0.136949458 | 7.486741537 | 7.06E-14       | 6.46E-13    |
| Gm11084       | 0.286905606 | 1.025107062 | 3.644167483 | 0.281300754 | 0.778479732 NA |             |
| Gm48216       | 97.72966567 | 1.024629688 | 0.276714298 | 3.702843316 | 0.000213197    | 0.000609521 |
| Il12rb1       | 27.17966272 | 1.024345095 | 0.441301896 | 2.321188975 | 0.020276647    | 0.038048501 |
| Cul4a         | 1267.522522 | 1.024154348 | 0.137466079 | 7.450233221 | 9.32E-14       | 8.45E-13    |
| Gm19241       | 4.98520971  | 1.023931803 | 0.769590224 | 1.330489619 | 0.183357004    | 0.257867531 |
| Ndufc2        | 1149.489501 | 1.023792826 | 0.138605521 | 7.386378419 | 1.51E-13       | 1.34E-12    |
| BC004004      | 1626.037774 | 1.023784018 | 0.133729904 | 7.6556102   | 1.92E-14       | 1.87E-13    |

|               |             |             |             |             |                |             |
|---------------|-------------|-------------|-------------|-------------|----------------|-------------|
| Mrpl55        | 307.0417366 | 1.023733513 | 0.14620599  | 7.001994316 | 2.52E-12       | 1.97E-11    |
| Cyb5f1        | 156.5201329 | 1.023683514 | 0.290438873 | 3.524609167 | 0.000424108    | 0.00114765  |
| Rassf3        | 1067.603144 | 1.023560365 | 0.170555699 | 6.001326091 | 1.96E-09       | 1.10E-08    |
| 2310061104Rik | 516.5244966 | 1.023373761 | 0.247696117 | 4.13156965  | 3.60E-05       | 0.000116929 |
| Agbl4         | 7.536111862 | 1.023321334 | 0.720041695 | 1.421197328 | 0.155259401    | 0.224367405 |
| Gabarapl1     | 5939.130259 | 1.023251825 | 0.256486638 | 3.989493695 | 6.62E-05       | 0.00020599  |
| Ice2          | 259.1553682 | 1.023124614 | 0.227715644 | 4.492992203 | 7.02E-06       | 2.54E-05    |
| Slc25a19      | 225.1034854 | 1.022964676 | 0.200463357 | 5.103000824 | 3.34E-07       | 1.44E-06    |
| Slc16a2       | 2092.911188 | 1.022906951 | 0.227492449 | 4.496443525 | 6.91E-06       | 2.50E-05    |
| Homer2        | 287.2280673 | 1.022827668 | 0.311880463 | 3.279550306 | 0.001039727    | 0.00261088  |
| Fbxl21        | 25.96674173 | 1.022133106 | 0.406965171 | 2.511598481 | 0.012018575    | 0.023910919 |
| Acot8         | 216.0049391 | 1.021891762 | 0.227765811 | 4.486589791 | 7.24E-06       | 2.61E-05    |
| Mrps30        | 414.8701216 | 1.021715386 | 0.153938502 | 6.637165981 | 3.20E-11       | 2.21E-10    |
| H2-T23        | 2917.134013 | 1.021369326 | 0.219393335 | 4.655425507 | 3.23E-06       | 1.22E-05    |
| Txnrd2        | 532.3140454 | 1.021291865 | 0.211595557 | 4.826622442 | 1.39E-06       | 5.50E-06    |
| Stard7        | 1883.833378 | 1.021267997 | 0.208576777 | 4.896364825 | 9.76E-07       | 3.95E-06    |
| Fra10ac1      | 231.1357116 | 1.02002135  | 0.17948146  | 5.683157187 | 1.32E-08       | 6.74E-08    |
| Olfr628       | 1.819566305 | 1.019964441 | 1.322524945 | 0.771225106 | 0.440573516    | 0.531872874 |
| Npas3         | 1.187868147 | 1.01985152  | 1.782520251 | 0.572140215 | 0.567226986 NA |             |
| Pi4k2a        | 1020.731585 | 1.019466484 | 0.130218508 | 7.828890851 | 4.92E-15       | 5.04E-14    |
| Rab3gap1      | 854.6989712 | 1.019291741 | 0.162225408 | 6.283181857 | 3.32E-10       | 2.04E-09    |
| Itm2b         | 15485.4173  | 1.018895902 | 0.176432755 | 5.774981551 | 7.70E-09       | 4.04E-08    |
| Cdip1         | 1725.720189 | 1.018693373 | 0.230566885 | 4.418211973 | 9.95E-06       | 3.52E-05    |
| Zfp966        | 118.6661444 | 1.018113721 | 0.282150809 | 3.608402626 | 0.000308088    | 0.000853614 |
| Cyp4f17       | 183.2749776 | 1.01803668  | 0.222211311 | 4.581390009 | 4.62E-06       | 1.71E-05    |
| Rnasek        | 987.2072963 | 1.017550405 | 0.143333421 | 7.099184519 | 1.25E-12       | 1.01E-11    |
| Dgkb          | 0.87095145  | 1.017514785 | 2.324454729 | 0.43774343  | 0.661572283 NA |             |
| 1700092M07Rik | 0.981324605 | 1.01734256  | 1.989434618 | 0.511372704 | 0.609090105 NA |             |
| Smim26        | 167.1053426 | 1.01725932  | 0.192827303 | 5.275494214 | 1.32E-07       | 5.99E-07    |
| Tcaim         | 334.2212445 | 1.01665066  | 0.220643519 | 4.607661564 | 4.07E-06       | 1.52E-05    |
| Psma8         | 15.47507764 | 1.016060567 | 0.560797352 | 1.811814132 | 0.070014921    | 0.113170984 |
| 6330549D23Rik | 9.551634404 | 1.015772707 | 0.593904304 | 1.710330603 | 0.087204756    | 0.137374485 |
| Cyp2c52-ps    | 4.528114883 | 1.015571264 | 1.048430959 | 0.968658218 | 0.332715746    | 0.42484743  |
| Asb16         | 5.367734835 | 1.014966803 | 0.970523396 | 1.045793236 | 0.295656505    | 0.385112476 |
| Dhx16         | 770.7881607 | 1.014871978 | 0.189335478 | 5.360178616 | 8.31E-08       | 3.86E-07    |
| Mrpl42        | 939.2559589 | 1.014748105 | 0.204481112 | 4.962551778 | 6.96E-07       | 2.87E-06    |
| Zfp820        | 38.54366106 | 1.014518807 | 0.319525998 | 3.175074372 | 0.001497981    | 0.003639906 |
| Kcna2         | 24.17629982 | 1.013959192 | 0.784090348 | 1.293166272 | 0.195953558    | 0.272525392 |
| Tufm          | 1296.75362  | 1.013624317 | 0.13063064  | 7.759468346 | 8.53E-15       | 8.55E-14    |
| Dnajc11       | 831.3492794 | 1.013413929 | 0.154267798 | 6.569186444 | 5.06E-11       | 3.43E-10    |
| Slc33a1       | 1145.365557 | 1.012795172 | 0.199514876 | 5.076289007 | 3.85E-07       | 1.64E-06    |
| Smc5          | 478.6508373 | 1.012710062 | 0.206772533 | 4.897701098 | 9.70E-07       | 3.92E-06    |
| Dtnbp1        | 532.1959422 | 1.012619555 | 0.15117972  | 6.698117693 | 2.11E-11       | 1.49E-10    |
| Mrpl51        | 1045.739831 | 1.011846999 | 0.189723646 | 5.33326773  | 9.65E-08       | 4.44E-07    |
| Madd          | 404.4252722 | 1.011690846 | 0.172336977 | 5.870422365 | 4.35E-09       | 2.35E-08    |
| 2810006K23Rik | 155.331445  | 1.01167817  | 0.203620736 | 4.968443744 | 6.75E-07       | 2.78E-06    |
| Fam209        | 4.599595297 | 1.011666954 | 0.909333973 | 1.112536191 | 0.265907679    | 0.351764887 |
| Fndc4         | 653.6666947 | 1.01164137  | 0.293139082 | 3.451062765 | 0.000558384    | 0.001479535 |
| BC053393      | 5.26946339  | 1.011040853 | 0.801828098 | 1.260919711 | 0.207337776    | 0.286024794 |
| Zfp563        | 37.22859705 | 1.010254385 | 0.3895974   | 2.593072707 | 0.009512266    | 0.01941632  |
| Borcs5        | 152.1471234 | 1.010000326 | 0.199506247 | 5.062499741 | 4.14E-07       | 1.75E-06    |
| Mrps28        | 397.8311168 | 1.00990501  | 0.196857544 | 5.130131093 | 2.90E-07       | 1.25E-06    |
| Gda           | 319.6867872 | 1.009768277 | 0.323012528 | 3.126096324 | 0.001771435    | 0.004237921 |
| Pkn2          | 811.7558369 | 1.009671897 | 0.205808584 | 4.905878454 | 9.30E-07       | 3.77E-06    |
| Gm1968        | 3.452909733 | 1.008794855 | 0.897696387 | 1.123759514 | 0.261115061    | 0.346365512 |
| Gng5          | 1632.332576 | 1.008523411 | 0.192789139 | 5.231225252 | 1.68E-07       | 7.55E-07    |
| Mnd1          | 82.37351325 | 1.008307991 | 0.283599476 | 3.555394408 | 0.000377412    | 0.001031606 |
| Akr1a1        | 6082.715749 | 1.008153894 | 0.15052629  | 6.697526994 | 2.12E-11       | 1.50E-10    |
| Cfap46        | 1.372852842 | 1.007626717 | 1.73432591  | 0.580990407 | 0.561246919 NA |             |
| Atg4c         | 184.9551885 | 1.007388468 | 0.227845679 | 4.421363054 | 9.81E-06       | 3.47E-05    |
| Ifrd2         | 574.1648004 | 1.006953447 | 0.166761402 | 6.038288438 | 1.56E-09       | 8.84E-09    |
| Usf3          | 630.5659274 | 1.006796255 | 0.167453872 | 6.012379676 | 1.83E-09       | 1.03E-08    |
| Shb           | 564.0906021 | 1.006752343 | 0.251148087 | 4.00860049  | 6.11E-05       | 0.000190852 |
| Pyroxd2       | 697.8664842 | 1.006623838 | 0.458173189 | 2.19703785  | 0.028017743    | 0.050664525 |
| Apopt1        | 366.7068166 | 1.006000649 | 0.20790031  | 4.838860735 | 1.31E-06       | 5.19E-06    |
| Gm4217        | 1.706641331 | 1.005958026 | 1.412163531 | 0.712352361 | 0.476246607    | 0.566978503 |



|               |             |             |             |             |                |             |
|---------------|-------------|-------------|-------------|-------------|----------------|-------------|
| Zfp141        | 188.5489432 | 1.005928162 | 0.207894972 | 4.83863633  | 1.31E-06       | 5.19E-06    |
| Apob          | 55502.80651 | 1.005219745 | 0.261788801 | 3.839811875 | 0.000123129    | 0.000366079 |
| Spast         | 473.0486447 | 1.00479824  | 0.164996166 | 6.089827796 | 1.13E-09       | 6.55E-09    |
| Hnf1a         | 462.1609243 | 1.003947325 | 0.326664464 | 3.073328864 | 0.002116851    | 0.004983163 |
| Mid1-ps1      | 1.493714469 | 1.003905147 | 1.977561673 | 0.507647959 | 0.611700251 NA |             |
| Gm3383        | 0.475861907 | 1.003702675 | 3.081352983 | 0.325734403 | 0.744625313 NA |             |
| Epb41         | 1643.58611  | 1.003462439 | 0.210460593 | 4.767935059 | 1.86E-06       | 7.23E-06    |
| Pir           | 329.7818353 | 1.003374034 | 0.354666769 | 2.829061314 | 0.004668475    | 0.010218021 |
| 1700003E16Rik | 7.443836313 | 1.002803721 | 0.720728499 | 1.391375146 | 0.164111697    | 0.234693081 |
| Tapt1         | 800.0017233 | 1.002642489 | 0.18834377  | 5.323470417 | 1.02E-07       | 4.67E-07    |
| Eif4a-ps4     | 74.58038343 | 1.002283246 | 2.866742368 | 0.349624458 | 0.726620553    | 0.790129973 |
| Grik5         | 353.9848649 | 1.002199628 | 0.315412073 | 3.177429507 | 0.001485868    | 0.003613048 |
| Nudt9         | 595.8552282 | 1.002044198 | 0.152799289 | 6.557911387 | 5.46E-11       | 3.68E-10    |
| Grik4         | 9.453018336 | 1.002031433 | 0.654890902 | 1.530073832 | 0.125998455    | 0.187911963 |
| Anks1b        | 1.05780668  | 1.001900331 | 1.788413099 | 0.560217508 | 0.575331086 NA |             |
| Qprt          | 2879.839164 | 1.001680996 | 0.113688065 | 8.810784104 | 1.24E-18       | 1.77E-17    |
| Cecr2         | 357.6288057 | 1.001494725 | 0.147893653 | 6.77172216  | 1.27E-11       | 9.20E-11    |
| Ankef1        | 2.098831451 | 1.001205203 | 1.465478944 | 0.683193168 | 0.494484789    | 0.584359953 |
| Yif1a         | 645.9837158 | 1.001036514 | 0.238321763 | 4.200357121 | 2.66E-05       | 8.80E-05    |
| Ube2h         | 1754.099084 | 1.000609577 | 0.19542168  | 5.120258806 | 3.05E-07       | 1.32E-06    |
| Tmco1         | 1268.547713 | 1.000604999 | 0.186289105 | 5.371248094 | 7.82E-08       | 3.64E-07    |
| Apba3         | 552.6397313 | 1.000525315 | 0.209451251 | 4.776888703 | 1.78E-06       | 6.94E-06    |
| Exosc7        | 370.3675827 | 1.000422657 | 0.204971029 | 4.880800282 | 1.06E-06       | 4.25E-06    |
| Nudt2         | 185.7250869 | 1.000358537 | 0.237895676 | 4.205030353 | 2.61E-05       | 8.64E-05    |
| Ufsp2         | 528.8356325 | 1.000266615 | 0.136192366 | 7.342750887 | 2.09E-13       | 1.83E-12    |
| Sco1          | 179.9746099 | 0.999858339 | 0.16985151  | 5.886661466 | 3.94E-09       | 2.14E-08    |
| Gm9903        | 1.630135    | 0.999442949 | 1.34946748  | 0.740620255 | 0.458923723 NA |             |
| Cmpk1         | 1206.717531 | 0.999340371 | 0.19413661  | 5.147614215 | 2.64E-07       | 1.15E-06    |
| Cabcoco1      | 27.55000276 | 0.998864638 | 0.469395161 | 2.127982393 | 0.033338543    | 0.059092897 |
| Gm8956        | 6.388853868 | 0.998751199 | 0.761150805 | 1.31215942  | 0.189466351    | 0.265103607 |
| Pqlc2         | 260.2783454 | 0.9981135   | 0.209534833 | 4.76347292  | 1.90E-06       | 7.37E-06    |
| Psma5         | 966.1970637 | 0.99808785  | 0.164888234 | 6.053117481 | 1.42E-09       | 8.11E-09    |
| Gabarapl2     | 910.3590899 | 0.997276366 | 0.152697351 | 6.531065255 | 6.53E-11       | 4.37E-10    |
| Supv3l1       | 306.5178415 | 0.997104091 | 0.148602249 | 6.70988559  | 1.95E-11       | 1.38E-10    |
| Atox1         | 1477.415062 | 0.997091467 | 0.108088965 | 9.22472955  | 2.84E-20       | 4.64E-19    |
| Tle2          | 376.3568284 | 0.997012564 | 0.283272335 | 3.519625612 | 0.000432156    | 0.001167946 |
| Ccdc142       | 23.86518037 | 0.996983368 | 0.519889768 | 1.917682226 | 0.055151317    | 0.091770003 |
| Usp4          | 1254.455571 | 0.996730438 | 0.132876353 | 7.501187505 | 6.32E-14       | 5.82E-13    |
| Ints8         | 344.3329376 | 0.99657884  | 0.160429195 | 6.211954364 | 5.23E-10       | 3.14E-09    |
| Pim1          | 843.1297627 | 0.99620002  | 0.20984314  | 4.747355664 | 2.06E-06       | 7.95E-06    |
| Pirt          | 1.154649243 | 0.996007289 | 1.668544893 | 0.596931669 | 0.550553002 NA |             |
| Gm43518       | 0.967783458 | 0.995591014 | 1.940055385 | 0.513176594 | 0.607827797 NA |             |
| Cntf          | 22.17706855 | 0.995346303 | 0.591378617 | 1.683094848 | 0.092356732    | 0.14430369  |
| Olfr890       | 1.263831951 | 0.99489764  | 1.483156285 | 0.670797576 | 0.502349492 NA |             |
| Olfr66        | 12.8069049  | 0.994617989 | 0.518743995 | 1.917358079 | 0.055192456    | 0.091824045 |
| Furin         | 3225.397966 | 0.994300163 | 0.220705782 | 4.505093416 | 6.63E-06       | 2.41E-05    |
| Zfp946        | 277.3573733 | 0.993876879 | 0.229744594 | 4.326007678 | 1.52E-05       | 5.21E-05    |
| Nipsnap3b     | 835.0947571 | 0.993872931 | 0.150214218 | 6.616370546 | 3.68E-11       | 2.52E-10    |
| Sic16a11      | 234.687583  | 0.993811797 | 0.472225168 | 2.104529498 | 0.035332284    | 0.062123018 |
| Gm47102       | 164.3733949 | 0.993008624 | 0.228054884 | 4.35425282  | 1.34E-05       | 4.62E-05    |
| Exosc5        | 528.9655876 | 0.991890802 | 0.198886087 | 4.987230713 | 6.13E-07       | 2.54E-06    |
| Hspd1-ps4     | 1.511590771 | 0.991131304 | 1.534393072 | 0.645943547 | 0.518315916 NA |             |
| Olfr1565      | 4.897025413 | 0.990639925 | 0.849603619 | 1.166002477 | 0.243613444    | 0.327275177 |
| Eif4a2        | 4478.247685 | 0.990060795 | 0.153471867 | 6.451089799 | 1.11E-10       | 7.21E-10    |
| Setdb2        | 260.4352706 | 0.989505919 | 0.265674571 | 3.724503678 | 0.0001957      | 0.000563182 |
| Ect2l         | 2.9722331   | 0.989495179 | 1.163597315 | 0.850375956 | 0.395116099    | 0.487793415 |
| Olfr1116      | 13.74867412 | 0.989207458 | 0.544689329 | 1.8160948   | 0.069355831    | 0.112254648 |
| Ndufa4        | 4709.407566 | 0.988663496 | 0.186129953 | 5.311684021 | 1.09E-07       | 4.97E-07    |
| Rfng          | 285.0077895 | 0.988035034 | 0.159430194 | 6.197289273 | 5.74E-10       | 3.43E-09    |
| Gm48035       | 2.257900545 | 0.987454566 | 1.436312086 | 0.687493042 | 0.491772084    | 0.581638024 |
| Cd302         | 3127.957983 | 0.98739583  | 0.314696719 | 3.137610821 | 0.001703309    | 0.00408986  |
| Trim9         | 2.254371056 | 0.987325946 | 1.313547369 | 0.751648528 | 0.452262452    | 0.54312273  |
| Uchl3         | 292.8834849 | 0.987242717 | 0.283689187 | 3.480015315 | 0.000513385    | 0.001340322 |
| Zfand6        | 1657.631207 | 0.987227485 | 0.119573684 | 8.256227063 | 1.50E-16       | 1.77E-15    |
| Sic2a2        | 3772.537565 | 0.98720973  | 0.146811662 | 6.724327743 | 1.76E-11       | 1.25E-10    |
| Uqcc3         | 422.8793778 | 0.986491665 | 0.126371256 | 7.806297888 | 5.89E-15       | 5.98E-14    |

|               |             |             |             |             |             |             |
|---------------|-------------|-------------|-------------|-------------|-------------|-------------|
| Ctsz          | 3348.996659 | 0.986067029 | 0.138778249 | 7.105342797 | 1.20E-12    | 9.72E-12    |
| Mrpl39        | 587.5366517 | 0.985958797 | 0.173347136 | 5.687770917 | 1.29E-08    | 6.58E-08    |
| Pbpb          | 3.739435612 | 0.985578583 | 1.288868118 | 0.764685362 | 0.444458925 | 0.53567591  |
| F12           | 7888.202383 | 0.984978399 | 0.203595168 | 4.83792621  | 1.31E-06    | 5.21E-06    |
| Psm6          | 1022.799624 | 0.984720054 | 0.127700745 | 7.711153555 | 1.25E-14    | 1.23E-13    |
| Polb          | 312.3873949 | 0.984485823 | 0.182588286 | 5.391834519 | 6.97E-08    | 3.26E-07    |
| Grpel2        | 731.5745605 | 0.984401325 | 0.175856268 | 5.597760818 | 2.17E-08    | 1.08E-07    |
| Afmid         | 2320.769704 | 0.984248431 | 0.240390806 | 4.094368035 | 4.23E-05    | 0.000135781 |
| Arl6ip1       | 2813.780482 | 0.983707472 | 0.17829567  | 5.517281899 | 3.44E-08    | 1.67E-07    |
| Fdx2          | 328.952612  | 0.983609823 | 0.15946764  | 6.168084142 | 6.91E-10    | 4.10E-09    |
| Naaladl2      | 106.059208  | 0.983546426 | 0.293921635 | 3.346287957 | 0.000819013 | 0.002099313 |
| Gm42857       | 136.7931533 | 0.983352386 | 0.215478555 | 4.563574247 | 5.03E-06    | 1.85E-05    |
| Gm15542       | 24.10093683 | 0.98292664  | 1.653140432 | 0.594581453 | 0.552123281 | 0.637558412 |
| Gm43582       | 1.859139605 | 0.982691517 | 1.490456491 | 0.659322511 | 0.50968869  | 0.599046727 |
| Sacm1l        | 927.4522221 | 0.982251128 | 0.142768995 | 6.880003096 | 5.99E-12    | 4.49E-11    |
| Coq10b        | 412.0291006 | 0.981539537 | 0.296889772 | 3.30607394  | 0.000946131 | 0.002398817 |
| Psmb1         | 2214.868414 | 0.981230553 | 0.106260098 | 9.234233507 | 2.60E-20    | 4.26E-19    |
| Gm21056       | 5.275143247 | 0.980906368 | 1.117498674 | 0.877769603 | 0.380068763 | 0.472002994 |
| Duspr1        | 2267.497671 | 0.980379974 | 0.382805993 | 2.56103612  | 0.010436051 | 0.021087122 |
| Gprasp2       | 12.50077852 | 0.980237812 | 0.616177065 | 1.590837874 | 0.111646067 | 0.169698836 |
| Pnkd          | 1729.960101 | 0.980193048 | 0.184213762 | 5.320954508 | 1.03E-07    | 4.73E-07    |
| Cerkl         | 33.9173027  | 0.980097086 | 0.469975585 | 2.085421277 | 0.037031077 | 0.064815791 |
| Pam16         | 75.05517997 | 0.979876684 | 0.422553505 | 2.318941086 | 0.020398231 | 0.038247805 |
| F2rl2         | 2.944186236 | 0.979541499 | 1.155368018 | 0.847817738 | 0.396539483 | 0.489373469 |
| Mrrps18c      | 370.5462965 | 0.979295643 | 0.184155985 | 5.317750838 | 1.05E-07    | 4.81E-07    |
| Nsmce3        | 282.79891   | 0.979166657 | 0.16153434  | 6.06166199  | 1.35E-09    | 7.72E-09    |
| Dcdc5         | 0.579672843 | 0.978892645 | 3.525937742 | 0.277626185 | 0.781299329 | NA          |
| Bcas3         | 326.2275738 | 0.978756462 | 0.19247448  | 5.085123284 | 3.67E-07    | 1.57E-06    |
| Gm16147       | 1.382752616 | 0.978738756 | 1.684438807 | 0.58104738  | 0.561208521 | NA          |
| Nsun2         | 1102.806176 | 0.978728078 | 0.180249088 | 5.429864237 | 5.64E-08    | 2.66E-07    |
| Alg11         | 480.7048136 | 0.978312623 | 0.182880056 | 5.349476818 | 8.82E-08    | 4.07E-07    |
| Isca2         | 505.3738312 | 0.977259794 | 0.209339213 | 4.668307394 | 3.04E-06    | 1.15E-05    |
| 4930512M02Rik | 1.286707465 | 0.976598611 | 1.485545497 | 0.657400674 | 0.510923319 | NA          |
| Olfr433       | 3.20319652  | 0.976433998 | 0.981616826 | 0.994720111 | 0.319872411 | 0.411312781 |
| Nags          | 1058.788256 | 0.976043465 | 0.209314126 | 4.663055873 | 3.12E-06    | 1.18E-05    |
| Gatc          | 286.6070673 | 0.975900192 | 0.144347458 | 6.760771574 | 1.37E-11    | 9.90E-11    |
| Sw1           | 259.4628161 | 0.975398803 | 0.205925713 | 4.736653756 | 2.17E-06    | 8.36E-06    |
| Ttc23         | 396.8277363 | 0.974695859 | 0.275252117 | 3.541102135 | 0.000398459 | 0.001083688 |
| Vmn1r65       | 108.7868258 | 0.97445324  | 0.328564082 | 2.965793563 | 0.003019031 | 0.006881727 |
| 1110065P20Rik | 280.4150489 | 0.974365859 | 0.180286094 | 5.404553609 | 6.50E-08    | 3.05E-07    |
| Acot7         | 276.230823  | 0.973712297 | 0.215848912 | 4.511082729 | 6.45E-06    | 2.34E-05    |
| Apeh          | 1005.75452  | 0.973601467 | 0.131354832 | 7.411995843 | 1.24E-13    | 1.11E-12    |
| Fxn           | 249.4544804 | 0.972987669 | 0.204174436 | 4.765472539 | 1.88E-06    | 7.31E-06    |
| Lrp1          | 10529.38611 | 0.972916347 | 0.178382677 | 5.454096558 | 4.92E-08    | 2.34E-07    |
| Vars2         | 404.2724242 | 0.972500269 | 0.249103004 | 3.9040086   | 9.46E-05    | 0.00028736  |
| Flcn          | 748.7953355 | 0.971723894 | 0.208525235 | 4.65998225  | 3.16E-06    | 1.19E-05    |
| Pdzk1         | 980.7583133 | 0.971675609 | 0.252509168 | 3.848080519 | 0.000119047 | 0.000354872 |
| Atxn2         | 1285.321219 | 0.971646672 | 0.220212066 | 4.412322582 | 1.02E-05    | 3.61E-05    |
| Gm17938       | 0.876769482 | 0.971117091 | 1.821146602 | 0.533244874 | 0.593864082 | NA          |
| Zfp787        | 490.5156032 | 0.970937089 | 0.192374961 | 5.047107397 | 4.49E-07    | 1.89E-06    |
| Lama1         | 43.65022885 | 0.970243136 | 0.366475386 | 2.647498775 | 0.008108965 | 0.016830003 |
| Abhd5         | 610.6810281 | 0.970179528 | 0.230742009 | 4.204607268 | 2.62E-05    | 8.65E-05    |
| Hadha         | 3961.759127 | 0.970069594 | 0.149690548 | 6.480499976 | 9.14E-11    | 6.01E-10    |
| Tysnd1        | 673.1525378 | 0.969784917 | 0.186866517 | 5.189720082 | 2.11E-07    | 9.33E-07    |
| Cgrf1         | 474.4607567 | 0.969650922 | 0.18702719  | 5.184545216 | 2.17E-07    | 9.56E-07    |
| Gm45908       | 0.839560294 | 0.969052499 | 2.245188969 | 0.43161289  | 0.666022789 | NA          |
| Rbm48         | 105.6157981 | 0.969040451 | 0.264863968 | 3.658634498 | 0.000253563 | 0.00071462  |
| Ppp1r9a       | 415.7381218 | 0.968934636 | 0.702107455 | 1.380037526 | 0.167575091 | 0.238884535 |
| F2            | 24393.22779 | 0.96821842  | 0.24052575  | 4.025425214 | 5.69E-05    | 0.000178458 |
| Olfr586       | 7.121194048 | 0.968173462 | 0.66192992  | 1.462652514 | 0.143562486 | 0.209757736 |
| Mrpl16        | 524.886859  | 0.968039727 | 0.14354819  | 6.743656811 | 1.54E-11    | 1.10E-10    |
| Vmn1r81       | 36.21843423 | 0.967991848 | 0.359700162 | 2.691107626 | 0.007121522 | 0.014973816 |
| Mpzl2         | 657.6388692 | 0.967953977 | 0.244559402 | 3.957950374 | 7.56E-05    | 0.000232964 |
| Gpr108        | 372.5461896 | 0.967711806 | 0.170201927 | 5.685668907 | 1.30E-08    | 6.65E-08    |
| Eefsec        | 520.3188758 | 0.967061784 | 0.184061926 | 5.254002295 | 1.49E-07    | 6.71E-07    |
| Tshb          | 3.842946706 | 0.966551325 | 0.927120626 | 1.042530279 | 0.297165895 | 0.38666495  |

|               |             |             |             |             |                |             |
|---------------|-------------|-------------|-------------|-------------|----------------|-------------|
| 3110001i22Rik | 27.43942522 | 0.966482288 | 0.44420767  | 2.175744262 | 0.029574389    | 0.053105559 |
| Vcp           | 5491.312505 | 0.965832964 | 0.17610467  | 5.484425634 | 4.15E-08       | 1.99E-07    |
| Ube2r2        | 1325.496632 | 0.965471485 | 0.139782367 | 6.906961925 | 4.95E-12       | 3.76E-11    |
| Gabrg3        | 1.732446039 | 0.965127865 | 1.377537665 | 0.700618132 | 0.48354136     | 0.573854027 |
| Tgds          | 329.0120057 | 0.964905358 | 0.223889837 | 4.309732737 | 1.63E-05       | 5.58E-05    |
| Nbn           | 258.9993652 | 0.964668939 | 0.185558367 | 5.198735861 | 2.01E-07       | 8.93E-07    |
| Ero1l         | 514.4577727 | 0.964564411 | 0.219114216 | 4.402107849 | 1.07E-05       | 3.76E-05    |
| Noa1          | 178.3754186 | 0.964518348 | 0.20604422  | 4.681123053 | 2.85E-06       | 1.08E-05    |
| Rmi1          | 283.5503341 | 0.963871238 | 0.212665409 | 4.532336694 | 5.83E-06       | 2.13E-05    |
| Vps37a        | 689.0078782 | 0.963716077 | 0.158506898 | 6.079963013 | 1.20E-09       | 6.93E-09    |
| Nr2c1         | 323.3713753 | 0.962697197 | 0.149456913 | 6.441302558 | 1.18E-10       | 7.68E-10    |
| MacroD2       | 33.19228972 | 0.962644456 | 0.444137222 | 2.167448277 | 0.030200689    | 0.054110494 |
| Psmb3         | 1620.311    | 0.962515004 | 0.114662792 | 8.394309868 | 4.69E-17       | 5.83E-16    |
| Gm28040       | 42.7910502  | 0.962471392 | 0.524525743 | 1.834936424 | 0.06651511     | 0.108190974 |
| F5            | 6337.084834 | 0.962279392 | 0.17288199  | 5.566105486 | 2.60E-08       | 1.28E-07    |
| Gm15446       | 106.4263399 | 0.961985022 | 0.23126318  | 4.159698139 | 3.19E-05       | 0.000104134 |
| Irf3          | 1320.829415 | 0.961920432 | 0.140714021 | 6.835995614 | 8.14E-12       | 6.02E-11    |
| Hdhd5         | 317.6938348 | 0.961898384 | 0.218806252 | 4.396119282 | 1.10E-05       | 3.86E-05    |
| Naa38         | 386.6240496 | 0.961481454 | 0.164858173 | 5.832173418 | 5.47E-09       | 2.92E-08    |
| Agpat3        | 2821.323394 | 0.961234004 | 0.199394902 | 4.820755155 | 1.43E-06       | 5.65E-06    |
| Rbm11         | 1.849952479 | 0.961152865 | 1.71539634  | 0.5603095   | 0.575268349    | 0.658874631 |
| Gm10490       | 2.157500534 | 0.959731854 | 1.31353753  | 0.730646694 | 0.464994983    | 0.555595351 |
| Tmem59        | 3825.203856 | 0.959323264 | 0.129400561 | 7.413664624 | 1.23E-13       | 1.10E-12    |
| Pfdn2         | 806.0440297 | 0.959127894 | 0.156176312 | 6.141314803 | 8.18E-10       | 4.82E-09    |
| Nadsyn1       | 477.2939432 | 0.958915245 | 0.232668817 | 4.121374128 | 3.77E-05       | 0.000121671 |
| Gm11839       | 6.548680623 | 0.958499607 | 0.954416534 | 1.004278083 | 0.315244595    | 0.406496471 |
| Chrna7        | 0.28010516  | 0.958417877 | 3.643808362 | 0.263026422 | 0.792530214 NA |             |
| Esrp2         | 1679.987911 | 0.958368213 | 0.210096104 | 4.561570599 | 5.08E-06       | 1.87E-05    |
| Zfp809        | 567.1288513 | 0.958174185 | 0.193033778 | 4.96376434  | 6.91E-07       | 2.85E-06    |
| Smim19        | 258.0261596 | 0.958084423 | 0.220514603 | 4.344766329 | 1.39E-05       | 4.81E-05    |
| Map3k15       | 21.79938623 | 0.958072605 | 0.379387065 | 2.525316999 | 0.011559397    | 0.023136849 |
| Gm17538       | 4.992737675 | 0.958018344 | 3.367191813 | 0.284515524 | 0.776015339    | 0.830529819 |
| Gm19056       | 1.610324288 | 0.958004519 | 1.619310146 | 0.591612744 | 0.554109938 NA |             |
| Tnik          | 45.55881504 | 0.95778568  | 0.359994268 | 2.660558142 | 0.007801126    | 0.016248453 |
| Vop1          | 2.26256096  | 0.9576316   | 1.373935792 | 0.696998801 | 0.485803544    | 0.576177739 |
| Cope          | 1842.165456 | 0.957466679 | 0.146644368 | 6.529174571 | 6.61E-11       | 4.42E-10    |
| Gm10039       | 1.436097733 | 0.957448508 | 2.947528456 | 0.324830963 | 0.745309009 NA |             |
| Gm960         | 7.612140126 | 0.957056598 | 0.960020532 | 0.996912635 | 0.318806918    | 0.410190214 |
| Sec31b        | 159.7320166 | 0.956008577 | 0.341344747 | 2.800712724 | 0.005098989    | 0.011066526 |
| Au47325       | 3.155979208 | 0.95578226  | 1.04054379  | 0.918541122 | 0.35833564     | 0.450808501 |
| GM021092      | 18.04388045 | 0.95572387  | 0.698843092 | 1.367580048 | 0.171443565    | 0.243564159 |
| Col7a1        | 33.25376703 | 0.955662625 | 0.64565734  | 1.480139024 | 0.138836149    | 0.203773479 |
| Olfr1152      | 9.420185726 | 0.955240544 | 0.689786869 | 1.384834341 | 0.166103128    | 0.237162991 |
| Opcm1         | 5.507179745 | 0.955107602 | 0.856740174 | 1.114815939 | 0.264929305    | 0.350742781 |
| Npr1          | 164.452459  | 0.954956195 | 0.379241824 | 2.518066665 | 0.011800098    | 0.023538497 |
| Rnf5          | 1332.318073 | 0.954876507 | 0.116951626 | 8.164713392 | 3.22E-16       | 3.69E-15    |
| Eif2ak1       | 790.9734341 | 0.954454477 | 0.109746747 | 8.69688173  | 3.41E-18       | 4.68E-17    |
| Scfd2         | 140.1548853 | 0.954233481 | 0.266187951 | 3.584810949 | 0.000337322    | 0.000928127 |
| Gm37339       | 3.896478751 | 0.953976335 | 1.09894336  | 0.86808508  | 0.385347758    | 0.477539676 |
| Coa7          | 342.4035759 | 0.953945485 | 0.271190215 | 3.517625015 | 0.000435427    | 0.001175593 |
| Serp1         | 4379.762667 | 0.95391377  | 0.202718694 | 4.705603382 | 2.53E-06       | 9.66E-06    |
| Axdnd1        | 4.05874376  | 0.953768474 | 1.175169158 | 0.811601009 | 0.417020612    | 0.508829616 |
| Fbxo6         | 717.4184711 | 0.953763384 | 0.184067237 | 5.181603188 | 2.20E-07       | 9.70E-07    |
| Oxnad1        | 302.4840677 | 0.953723536 | 0.212222141 | 4.49398696  | 6.99E-06       | 2.53E-05    |
| Cct6b         | 11.01145128 | 0.952954401 | 0.71939998  | 1.324651691 | 0.185286703    | 0.260323694 |
| Zrsr1         | 447.671935  | 0.952739571 | 0.25561607  | 3.72722877  | 0.000193597    | 0.000557506 |
| Gm15369       | 1.183199894 | 0.952386531 | 1.833243722 | 0.519508956 | 0.603405869 NA |             |
| Mrps24        | 639.3380942 | 0.952115183 | 0.127894376 | 7.444543031 | 9.73E-14       | 8.81E-13    |
| Il11ra1       | 582.1454889 | 0.951888265 | 0.180618695 | 5.270153581 | 1.36E-07       | 6.16E-07    |
| Hnf4a         | 9053.778073 | 0.951477131 | 0.146200511 | 6.508028776 | 7.61E-11       | 5.05E-10    |
| Zfyve26       | 611.4990474 | 0.951411833 | 0.215707991 | 4.410647133 | 1.03E-05       | 3.63E-05    |
| Gfer          | 561.2648717 | 0.951366621 | 0.174187525 | 5.46173798  | 4.71E-08       | 2.25E-07    |
| Nadk          | 2273.803497 | 0.951357661 | 0.1842805   | 5.162551978 | 2.44E-07       | 1.07E-06    |
| Mycl          | 79.64400572 | 0.95134781  | 0.335145206 | 2.838613812 | 0.004530996    | 0.009947768 |
| Ppp2r5a       | 2672.185405 | 0.951243423 | 0.150061121 | 6.339039828 | 2.31E-10       | 1.45E-09    |
| Mterf4        | 274.798564  | 0.951205317 | 0.184022663 | 5.16895747  | 2.35E-07       | 1.03E-06    |

|          |             |             |             |             |                |             |
|----------|-------------|-------------|-------------|-------------|----------------|-------------|
| Bfar     | 829.047116  | 0.95065152  | 0.172779745 | 5.502100481 | 3.75E-08       | 1.81E-07    |
| Cts8-ps  | 1.078006513 | 0.950638384 | 2.139125322 | 0.444405185 | 0.656749666 NA |             |
| Atg4d    | 381.9850012 | 0.950398506 | 0.230801855 | 4.117811385 | 3.82E-05       | 0.00012345  |
| Saa3     | 85.64305993 | 0.950246058 | 0.339600998 | 2.798125042 | 0.005140021    | 0.011145647 |
| Mpnd     | 1084.142596 | 0.949918657 | 0.151194678 | 6.282751944 | 3.33E-10       | 2.04E-09    |
| Atp5e    | 2178.075673 | 0.949218824 | 0.168043693 | 5.648642961 | 1.62E-08       | 8.17E-08    |
| Rbm47    | 1327.879317 | 0.949186617 | 0.156061005 | 6.08215111  | 1.19E-09       | 6.85E-09    |
| Eif2b3   | 179.5853348 | 0.948882984 | 0.215669385 | 4.399711084 | 1.08E-05       | 3.80E-05    |
| Ginm1    | 741.1107817 | 0.948511934 | 0.189393225 | 5.008161892 | 5.50E-07       | 2.29E-06    |
| Gppp11   | 881.9919082 | 0.948298289 | 0.169210146 | 5.604263752 | 2.09E-08       | 1.04E-07    |
| Mrpl35   | 455.3565024 | 0.94825107  | 0.149686515 | 6.334913156 | 2.37E-10       | 1.49E-09    |
| Rps2-ps6 | 2.544077768 | 0.947996191 | 1.527174946 | 0.620751534 | 0.534763116    | 0.621999154 |
| Zfp72    | 34.79312552 | 0.947687712 | 0.345548059 | 2.742564128 | 0.006096155    | 0.013000656 |
| Fgb      | 71300.13197 | 0.947504231 | 0.319770238 | 2.963078233 | 0.003045791    | 0.006937161 |
| Olfr1090 | 1.127049527 | 0.947402428 | 2.123965704 | 0.446053543 | 0.6555857 NA   |             |
| Pgls     | 901.0539191 | 0.946299871 | 0.152437345 | 6.207795554 | 5.37E-10       | 3.23E-09    |
| Rabgef1  | 338.4547486 | 0.946258238 | 0.198333278 | 4.77105127  | 1.83E-06       | 7.13E-06    |
| Clec18a  | 1.150392112 | 0.946256238 | 2.089806728 | 0.452796053 | 0.650695606 NA |             |
| Tmem42   | 100.9591127 | 0.946205043 | 0.211899814 | 4.465341547 | 7.99E-06       | 2.86E-05    |
| Btnl10   | 19.93238925 | 0.945820087 | 0.496749269 | 1.904019083 | 0.056907699    | 0.094346246 |
| Gm4294   | 16.63243057 | 0.945278015 | 3.342413352 | 0.28281302  | 0.777320173    | 0.831631621 |
| Lrrc14b  | 13.28869236 | 0.945271198 | 0.692449304 | 1.365112497 | 0.172217695    | 0.244582411 |
| Serpinb7 | 0.991500424 | 0.945148686 | 1.904289948 | 0.496326039 | 0.619664398 NA |             |
| Trappc1  | 490.248869  | 0.945128453 | 0.167510444 | 5.642206129 | 1.68E-08       | 8.46E-08    |
| Nit1     | 1515.829379 | 0.945067394 | 0.184473325 | 5.123057204 | 3.01E-07       | 1.30E-06    |
| Cicn2    | 803.6160493 | 0.944826432 | 0.233744987 | 4.042124892 | 5.30E-05       | 0.00016707  |
| Itga2b   | 66.80369235 | 0.944824038 | 0.441776029 | 2.138694666 | 0.032460405    | 0.057722435 |
| Camta2   | 956.1540676 | 0.944779904 | 0.285139362 | 3.313396986 | 0.000921701    | 0.0023421   |
| Ncapd3   | 290.4453468 | 0.944633947 | 0.23858303  | 3.95935096  | 7.52E-05       | 0.000231644 |
| Gm9864   | 46.38521417 | 0.94423576  | 0.309053868 | 3.055246536 | 0.002248756    | 0.005263151 |
| Olfr1307 | 71.47336851 | 0.944157859 | 0.282637141 | 3.340530032 | 0.000836186    | 0.002141401 |
| Bcl7c    | 409.4120602 | 0.944064768 | 0.194272821 | 4.859479369 | 1.18E-06       | 4.71E-06    |
| Clk4     | 1063.367976 | 0.943950562 | 0.148289979 | 6.365572157 | 1.95E-10       | 1.23E-09    |
| Osbp2    | 23.75023113 | 0.943653736 | 0.524924373 | 1.797694649 | 0.07222541     | 0.116302898 |
| Crem     | 269.9385093 | 0.943169106 | 0.253891409 | 3.714852379 | 0.000203322    | 0.000583247 |
| Olfr984  | 1.798501827 | 0.942825159 | 1.303622773 | 0.723234649 | 0.469535735    | 0.560039544 |
| Mrpl15   | 850.2480073 | 0.941990465 | 0.208070124 | 4.527274006 | 5.97E-06       | 2.18E-05    |
| Lss      | 1226.117629 | 0.941986774 | 0.224800803 | 4.190317662 | 2.79E-05       | 9.17E-05    |
| Pja1     | 1058.618875 | 0.941392784 | 0.1683677   | 5.591290883 | 2.25E-08       | 1.12E-07    |
| H4c4     | 9.098980046 | 0.940813239 | 0.853289887 | 1.10257165  | 0.270213227    | 0.356630417 |
| Msh3     | 278.7516594 | 0.940788705 | 0.138157311 | 6.809547005 | 9.79E-12       | 7.20E-11    |
| Lrrc28   | 207.3027728 | 0.940666372 | 0.261972413 | 3.590707742 | 0.000329781    | 0.000909285 |
| Gm45716  | 138.5328608 | 0.940546404 | 0.418429102 | 2.247803513 | 0.024588722    | 0.045176046 |
| Adam23   | 121.5633011 | 0.940425127 | 0.293883011 | 3.199998269 | 0.001374284    | 0.003373477 |
| Ccdc36   | 6.742829912 | 0.940080123 | 0.849175176 | 1.107050877 | 0.268271932    | 0.354479918 |
| Xpa      | 227.7095897 | 0.939826828 | 0.184252503 | 5.100754734 | 3.38E-07       | 1.45E-06    |
| Clk3     | 1054.409921 | 0.93975727  | 0.22999672  | 4.085959437 | 4.39E-05       | 0.000140398 |
| Gpd1     | 6464.973758 | 0.939733628 | 0.183904269 | 5.109906548 | 3.22E-07       | 1.39E-06    |
| Actg2    | 8.155788205 | 0.939271258 | 0.963750581 | 0.97459994  | 0.329758743    | 0.421734963 |
| Stra6l   | 3348.799014 | 0.939085839 | 0.223236332 | 4.206689079 | 2.59E-05       | 8.58E-05    |
| Galt4    | 202.4961393 | 0.938772763 | 0.18140735  | 5.174943365 | 2.28E-07       | 1.00E-06    |
| Vps13d   | 1384.65523  | 0.938497521 | 0.219670483 | 4.272296893 | 1.93E-05       | 6.53E-05    |
| Gm4335   | 1.100956441 | 0.938479596 | 2.035334272 | 0.461093595 | 0.644731457 NA |             |
| Olfr285  | 1.271430525 | 0.938463937 | 1.597553549 | 0.587438172 | 0.556909463 NA |             |
| Tecta    | 0.539722853 | 0.938313678 | 2.498051619 | 0.37561821  | 0.707200751 NA |             |
| Ano5     | 1.74637354  | 0.93828672  | 1.55773314  | 0.602341118 | 0.546947096    | 0.63314688  |
| Gm36262  | 0.527379373 | 0.938093414 | 3.015501472 | 0.311090352 | 0.755731936 NA |             |
| Ncan     | 3.101083129 | 0.937765716 | 0.959036703 | 0.977820466 | 0.328163127    | 0.419946329 |
| Lipe     | 273.0396756 | 0.937697191 | 0.226653692 | 4.137136186 | 3.52E-05       | 0.000114238 |
| Gm7312   | 0.813569644 | 0.936981094 | 2.665077662 | 0.351577407 | 0.725155211 NA |             |
| Nbr1     | 3783.581087 | 0.936435419 | 0.128563071 | 7.283860093 | 3.24E-13       | 2.78E-12    |
| Mplkip   | 254.6877062 | 0.936378998 | 0.198904706 | 4.707676443 | 2.51E-06       | 9.57E-06    |
| Mlx      | 533.3718879 | 0.936115723 | 0.217921746 | 4.295650803 | 1.74E-05       | 5.92E-05    |
| Scarf1   | 302.7845932 | 0.936115204 | 0.220404861 | 4.247252978 | 2.16E-05       | 7.25E-05    |
| Dynlrb1  | 1283.537058 | 0.935655128 | 0.172287911 | 5.430764828 | 5.61E-08       | 2.65E-07    |
| Gm13071  | 4.930384163 | 0.935177304 | 0.996273819 | 0.938674976 | 0.347897645    | 0.440341455 |

|               |             |             |             |             |                |             |
|---------------|-------------|-------------|-------------|-------------|----------------|-------------|
| Lyrm4         | 144.046892  | 0.935176271 | 0.179086215 | 5.221933303 | 1.77E-07       | 7.93E-07    |
| Drc1          | 12.46853505 | 0.935123728 | 0.586579796 | 1.59419696  | 0.110891927    | 0.168748155 |
| Eif1          | 6205.731044 | 0.934896584 | 0.126637646 | 7.3824539   | 1.55E-13       | 1.38E-12    |
| Olfr129       | 1.884667692 | 0.934122911 | 1.215859671 | 0.768281845 | 0.442319758    | 0.533389536 |
| H6pd          | 6489.352491 | 0.933978807 | 0.237981959 | 3.924578193 | 8.69E-05       | 0.000265632 |
| Nfs1          | 916.1671242 | 0.933799906 | 0.208207545 | 4.484947496 | 7.29E-06       | 2.63E-05    |
| Aasdh         | 233.2066757 | 0.933750464 | 0.200638978 | 4.653883677 | 3.26E-06       | 1.23E-05    |
| Gm35315       | 43.80825282 | 0.933089366 | 0.423330823 | 2.20416118  | 0.027513011    | 0.049855634 |
| Colec12       | 832.5771549 | 0.933042356 | 0.304080967 | 3.06840104  | 0.002152076    | 0.005059797 |
| Ring1         | 432.9025397 | 0.932981751 | 0.281035378 | 3.319801789 | 0.000900814    | 0.002293812 |
| Psenen        | 898.116416  | 0.932689996 | 0.185330808 | 5.032568544 | 4.84E-07       | 2.03E-06    |
| Ola1          | 723.3880354 | 0.932395543 | 0.228349649 | 4.083192357 | 4.44E-05       | 0.000141975 |
| Pde10a        | 31.4921292  | 0.932171386 | 0.497540125 | 1.873560222 | 0.060991065    | 0.100209684 |
| Med29         | 310.137752  | 0.931717894 | 0.189049275 | 4.928439405 | 8.29E-07       | 3.39E-06    |
| Ahsg          | 136705.6062 | 0.931703513 | 0.241684881 | 3.855034326 | 0.000115713    | 0.000345902 |
| Zfp968        | 26.42180254 | 0.931605598 | 0.590139353 | 1.578619681 | 0.114423318    | 0.173363733 |
| Neurod6       | 6.067611802 | 0.931598161 | 0.964872719 | 0.965514044 | 0.334287405    | 0.426375257 |
| Dnajb2        | 802.5403804 | 0.930783606 | 0.175838958 | 5.293386729 | 1.20E-07       | 5.46E-07    |
| Cnga3         | 5.254540265 | 0.930528603 | 0.765470883 | 1.215628999 | 0.224126282    | 0.305476884 |
| Jmjd8         | 717.4270226 | 0.930394564 | 0.140017325 | 6.644853163 | 3.04E-11       | 2.10E-10    |
| Dnajc4        | 200.333307  | 0.930041638 | 0.179284933 | 5.187505855 | 2.13E-07       | 9.44E-07    |
| Rpain         | 316.0005323 | 0.93003923  | 0.179264889 | 5.188072446 | 2.12E-07       | 9.41E-07    |
| Mtx2          | 842.8348613 | 0.929309846 | 0.138519716 | 6.70886334  | 1.96E-11       | 1.39E-10    |
| Nop16         | 453.1906397 | 0.929203017 | 0.191729177 | 4.846435121 | 1.26E-06       | 5.00E-06    |
| Rpl35a-ps5    | 0.681255083 | 0.928887727 | 2.402631954 | 0.386612575 | 0.699043047 NA |             |
| Taf12         | 255.8450381 | 0.928531259 | 0.185224655 | 5.013000355 | 5.36E-07       | 2.24E-06    |
| Mrps11        | 275.8185472 | 0.928324297 | 0.180700557 | 5.137362661 | 2.79E-07       | 1.21E-06    |
| Ubl5          | 1093.356103 | 0.927223616 | 0.214787314 | 4.316938457 | 1.58E-05       | 5.42E-05    |
| Mrgprc2-ps    | 7.35917245  | 0.926984609 | 0.765072117 | 1.211630367 | 0.225653905    | 0.307207323 |
| Zfp970        | 429.0207247 | 0.926801801 | 0.447171232 | 2.072588161 | 0.038210624    | 0.066668173 |
| Bhmt2         | 3034.678145 | 0.926648388 | 0.344569764 | 2.689291068 | 0.007160395    | 0.015049984 |
| 4932414N04Rik | 23.8610434  | 0.9262695   | 0.445335619 | 2.079935807 | 0.037531421    | 0.065603985 |
| Sec16b        | 1738.553894 | 0.925960437 | 0.200804648 | 4.611250027 | 4.00E-06       | 1.49E-05    |
| Sic17a5       | 412.6145402 | 0.925426094 | 0.143379794 | 6.454368984 | 1.09E-10       | 7.06E-10    |
| Syvn1         | 1596.432051 | 0.924997196 | 0.235829083 | 3.922320289 | 8.77E-05       | 0.000267942 |
| Psmb7         | 2063.289318 | 0.924695147 | 0.181502343 | 5.094673328 | 3.49E-07       | 1.50E-06    |
| Eif3j1        | 724.1799963 | 0.924492437 | 0.21277383  | 4.344953682 | 1.39E-05       | 4.81E-05    |
| Olfr381       | 12.3385809  | 0.92446823  | 0.673263671 | 1.373114679 | 0.169716698    | 0.24153354  |
| Jade1         | 602.3554997 | 0.924398003 | 0.182971944 | 5.052129749 | 4.37E-07       | 1.84E-06    |
| Ftsj1         | 304.6364052 | 0.923731047 | 0.180679502 | 5.112539259 | 3.18E-07       | 1.37E-06    |
| Ift20         | 583.9304642 | 0.923504191 | 0.153925608 | 5.999678708 | 1.98E-09       | 1.11E-08    |
| Cpx           | 2279.829289 | 0.92315601  | 0.263208151 | 3.507323032 | 0.000452639    | 0.001218089 |
| Dld           | 1698.965762 | 0.922811242 | 0.21134     | 4.366476959 | 1.26E-05       | 4.38E-05    |
| Iba57         | 165.8166084 | 0.922387067 | 0.24748113  | 3.7271006   | 0.000193695    | 0.000557696 |
| Atg4a         | 220.183197  | 0.922312038 | 0.250474217 | 3.68226339  | 0.000231172    | 0.000656619 |
| Scly          | 1388.225093 | 0.922018575 | 0.208985799 | 4.411871901 | 1.02E-05       | 3.61E-05    |
| Lgals9        | 7487.4558   | 0.921529937 | 0.188180385 | 4.897056283 | 9.73E-07       | 3.93E-06    |
| Pithd1        | 278.7826222 | 0.921359398 | 0.226214877 | 4.072939005 | 4.64E-05       | 0.000147922 |
| Mpz13         | 128.165645  | 0.921197576 | 0.256584963 | 3.590224328 | 0.000330393    | 0.000910826 |
| Trim66        | 1.461492759 | 0.921085328 | 1.56471108  | 0.5886616   | 0.556088302 NA |             |
| Mrp117        | 782.6511166 | 0.920989481 | 0.188458161 | 4.886970548 | 1.02E-06       | 4.12E-06    |
| Rad23b        | 2917.653487 | 0.920859666 | 0.204933464 | 4.493456797 | 7.01E-06       | 2.53E-05    |
| Olfr1157      | 1.838980367 | 0.920497815 | 1.455794799 | 0.63229915  | 0.527191419    | 0.615375509 |
| Cib1          | 903.6120726 | 0.920153351 | 0.143827435 | 6.397620552 | 1.58E-10       | 1.01E-09    |
| Alg5          | 559.9214828 | 0.920147641 | 0.163898235 | 5.614140024 | 1.98E-08       | 9.88E-08    |
| Gm1821        | 23.33867803 | 0.919822657 | 0.788119551 | 1.167110568 | 0.24316572     | 0.326828225 |
| Gm48082       | 57.62763867 | 0.919636755 | 0.364347318 | 2.524066213 | 0.011600608    | 0.023201529 |
| S100a10       | 1869.324782 | 0.919629766 | 0.282146462 | 3.259405627 | 0.001116459    | 0.002790411 |
| Zfp273        | 38.44087225 | 0.919204198 | 0.332372077 | 2.765587909 | 0.005682029    | 0.012213747 |
| Ube2g1        | 794.3925593 | 0.918703419 | 0.139115692 | 6.603880601 | 4.01E-11       | 2.73E-10    |
| Tmem262       | 3.389973243 | 0.918453534 | 1.093440716 | 0.839966466 | 0.400927189    | 0.49396594  |
| AW209491      | 210.8670352 | 0.918360142 | 0.244585146 | 3.754766614 | 0.000173503    | 0.000504499 |
| Abcf3         | 730.1462007 | 0.918082997 | 0.158938599 | 5.776337552 | 7.63E-09       | 4.01E-08    |
| Cnpy2         | 1325.070998 | 0.917764321 | 0.182466479 | 5.029769451 | 4.91E-07       | 2.06E-06    |
| Vinac1        | 1.46188621  | 0.917711379 | 1.499214943 | 0.612127956 | 0.540453102 NA |             |
| Prdm8         | 2.507901936 | 0.917609205 | 1.102703249 | 0.83214519  | 0.405326997    | 0.497911417 |



|            |             |             |             |             |             |             |
|------------|-------------|-------------|-------------|-------------|-------------|-------------|
| Brd7       | 679.1861152 | 0.91730731  | 0.161302441 | 5.686878043 | 1.29E-08    | 6.61E-08    |
| Utp3       | 574.168908  | 0.917305527 | 0.178082325 | 5.151019492 | 2.59E-07    | 1.13E-06    |
| Mtx3       | 474.284693  | 0.916590708 | 0.189337183 | 4.841049673 | 1.29E-06    | 5.13E-06    |
| Abcc3      | 4397.749473 | 0.916523638 | 0.184865169 | 4.957795158 | 7.13E-07    | 2.94E-06    |
| Med8       | 535.1303625 | 0.916498385 | 0.17448366  | 5.252631592 | 1.50E-07    | 6.75E-07    |
| Mdm4-ps    | 4.404208076 | 0.916415363 | 0.827127059 | 1.107949926 | 0.267883442 | 0.354040244 |
| Olfr2      | 6.686852441 | 0.916408873 | 0.794820565 | 1.152975796 | 0.248920319 | 0.333065976 |
| Hrg        | 14984.93413 | 0.916350375 | 0.337385336 | 2.716034983 | 0.006606894 | 0.013990103 |
| Dusp11     | 1680.374774 | 0.915953163 | 0.156530455 | 5.851597149 | 4.87E-09    | 2.61E-08    |
| Gm48368    | 129.8897585 | 0.915872775 | 0.219154282 | 4.179123338 | 2.93E-05    | 9.62E-05    |
| Olfr16     | 1.582781891 | 0.915744772 | 1.473239072 | 0.621585993 | 0.534214133 | NA          |
| Mrpl41     | 334.1190302 | 0.915269304 | 0.18576966  | 4.926904129 | 8.35E-07    | 3.41E-06    |
| Fermt2     | 1912.577892 | 0.914876765 | 0.106974594 | 8.552280751 | 1.21E-17    | 1.58E-16    |
| Cab39l     | 850.8493184 | 0.914846108 | 0.169988434 | 5.381813837 | 7.37E-08    | 3.44E-07    |
| Ces2e      | 2450.602947 | 0.914678196 | 0.421854301 | 2.168232477 | 0.030141003 | 0.054014908 |
| Gm2445     | 2.71104502  | 0.914505584 | 1.264806825 | 0.723039729 | 0.469655476 | 0.560143176 |
| Eci2       | 3907.077974 | 0.913439778 | 0.221979976 | 4.114964752 | 3.87E-05    | 0.000124913 |
| Clic5      | 54.51702915 | 0.91318568  | 0.45246123  | 2.018262822 | 0.043563896 | 0.074836488 |
| Ppm1b      | 1744.941425 | 0.913159978 | 0.127538863 | 7.159856685 | 8.08E-13    | 6.67E-12    |
| Fastkd1    | 322.0429042 | 0.913028709 | 0.336999718 | 2.709286267 | 0.006742813 | 0.014239004 |
| Olfr539    | 72.92368932 | 0.912922602 | 0.358160071 | 2.548923442 | 0.010805602 | 0.021754121 |
| Gm40020    | 3.493459553 | 0.912710251 | 0.971809716 | 0.939186176 | 0.347635165 | 0.44013994  |
| Mrps34     | 647.7341346 | 0.912636948 | 0.144669056 | 6.308446124 | 2.82E-10    | 1.75E-09    |
| Pex5       | 1848.881561 | 0.911931611 | 0.119197091 | 7.650619672 | 2.00E-14    | 1.94E-13    |
| Acbd4      | 847.2066529 | 0.911663814 | 0.2465797   | 3.697237912 | 0.000217958 | 0.000622299 |
| Olfr1381   | 2.662360987 | 0.911241142 | 1.414340251 | 0.644287074 | 0.519389296 | 0.608016804 |
| Oma1       | 224.5024008 | 0.910344275 | 0.224856696 | 4.048553106 | 5.15E-05    | 0.000162849 |
| Gm14681    | 1.464147361 | 0.910196268 | 1.97807042  | 0.460143511 | 0.645413215 | NA          |
| Suds3      | 1401.27     | 0.909922    | 0.135412697 | 6.719620962 | 1.82E-11    | 1.29E-10    |
| Trmt2b     | 408.1309496 | 0.909842476 | 0.221925474 | 4.09976584  | 4.14E-05    | 0.000132853 |
| Dhrs7b     | 302.6370991 | 0.909792353 | 0.182194967 | 4.99350979  | 5.93E-07    | 2.46E-06    |
| Tnnc2      | 0.782310853 | 0.909020325 | 2.283789604 | 0.398031554 | 0.690606927 | NA          |
| Tgoln1     | 2089.534462 | 0.909015578 | 0.208343462 | 4.363062661 | 1.28E-05    | 4.44E-05    |
| Gm49111    | 2.012745541 | 0.90858681  | 1.585104824 | 0.573202981 | 0.566507266 | 0.650752367 |
| Dcaf11     | 4349.543986 | 0.908100808 | 0.191110741 | 4.751699482 | 2.02E-06    | 7.79E-06    |
| Zcwpw1     | 84.90143183 | 0.908056126 | 0.297881608 | 3.048379294 | 0.002300793 | 0.005374613 |
| Bhlhe41    | 64.96854347 | 0.907367273 | 0.465963401 | 1.94729301  | 0.051499616 | 0.086609989 |
| Muc16      | 1.523919646 | 0.907190078 | 2.175796971 | 0.416946108 | 0.676717827 | NA          |
| Gm12070    | 80.74448177 | 0.907160394 | 0.345857337 | 2.622932341 | 0.008717658 | 0.017951279 |
| Kdm5c      | 1087.122798 | 0.907079676 | 0.13947462  | 6.503546514 | 7.84E-11    | 5.20E-10    |
| Mdh2       | 3162.153844 | 0.906753217 | 0.142368129 | 6.369074474 | 1.90E-10    | 1.21E-09    |
| Gm38051    | 5.923005934 | 0.906062306 | 0.755088951 | 1.199941151 | 0.230162197 | 0.312454621 |
| Ranbp6     | 264.3016728 | 0.905573781 | 0.169691487 | 5.336589348 | 9.47E-08    | 4.36E-07    |
| Opa3       | 589.8728884 | 0.905026315 | 0.237739056 | 3.806805373 | 0.000140773 | 0.000415352 |
| Gm5845     | 0.563450063 | 0.904938232 | 2.898139899 | 0.312247946 | 0.754852096 | NA          |
| Ovca2      | 241.0615743 | 0.904917532 | 0.259536884 | 3.486662546 | 0.000489088 | 0.001310178 |
| Qtrt2      | 199.5049057 | 0.904759314 | 0.33686782  | 2.685799176 | 0.007235656 | 0.015189443 |
| Smim20     | 359.0978802 | 0.904695968 | 0.20417498  | 4.430983506 | 9.38E-06    | 3.33E-05    |
| Wdr61      | 701.5667843 | 0.904197006 | 0.147981931 | 6.110185223 | 9.95E-10    | 5.81E-09    |
| Atp6v0d1   | 950.9161078 | 0.903912438 | 0.126111199 | 7.167582627 | 7.63E-13    | 6.33E-12    |
| Fn3krp     | 140.8836523 | 0.90383761  | 0.271281302 | 3.331735744 | 0.000863062 | 0.002207573 |
| Tirap      | 300.7930921 | 0.902890475 | 0.224119739 | 4.028607568 | 5.61E-05    | 0.000176254 |
| Galnt13    | 1.030498532 | 0.902772148 | 1.983981924 | 0.45503043  | 0.649087347 | NA          |
| Gm28530    | 2.027685882 | 0.902344188 | 1.392735533 | 0.64789342  | 0.517053887 | 0.605615573 |
| Dnajc3     | 2798.554624 | 0.90232862  | 0.14937013  | 6.040890658 | 1.53E-09    | 8.72E-09    |
| Stoml3     | 3.271189021 | 0.90177672  | 1.104929561 | 0.816139554 | 0.414420323 | 0.506635903 |
| Adrm1      | 1575.235032 | 0.901268956 | 0.150760839 | 5.97813703  | 2.26E-09    | 1.26E-08    |
| Ccdc47     | 1425.051149 | 0.901179544 | 0.153385761 | 5.875249022 | 4.22E-09    | 2.28E-08    |
| Ifitm3     | 5138.112141 | 0.900818574 | 0.233638844 | 3.855602764 | 0.000115445 | 0.000345221 |
| Rpl31-ps13 | 0.613999038 | 0.900773083 | 2.203791024 | 0.408737976 | 0.682731961 | NA          |
| Mospd3     | 540.2091536 | 0.900417206 | 0.183476712 | 4.907528581 | 9.22E-07    | 3.74E-06    |
| Zfp442     | 24.81218852 | 0.900219817 | 0.397019641 | 2.267444033 | 0.023363114 | 0.043189587 |
| Mknk2      | 1912.556738 | 0.900017776 | 0.209392647 | 4.298230082 | 1.72E-05    | 5.86E-05    |
| Sra1       | 1130.757594 | 0.899933147 | 0.133440494 | 6.744078375 | 1.54E-11    | 1.10E-10    |
| Epb4113    | 49.32296927 | 0.899767802 | 0.481225838 | 1.869741254 | 0.061519758 | 0.101019922 |
| Crabp2     | 0.724109105 | 0.899644383 | 2.844381393 | 0.316288239 | 0.751783737 | NA          |

|               |             |             |             |             |                |             |
|---------------|-------------|-------------|-------------|-------------|----------------|-------------|
| Zfp874b       | 148.9405757 | 0.899630608 | 0.310118028 | 2.90092973  | 0.003720573    | 0.008320652 |
| Gm12850       | 0.613753708 | 0.899009846 | 2.203908932 | 0.407916059 | 0.683335302 NA |             |
| BC049352      | 3.547020192 | 0.898419469 | 1.080799731 | 0.831254341 | 0.405829962    | 0.498385621 |
| Sycp1         | 0.946871113 | 0.898272177 | 3.188554232 | 0.281717704 | 0.778159978 NA |             |
| Gm35405       | 0.590577766 | 0.898183393 | 2.495006537 | 0.359992401 | 0.718852816 NA |             |
| Gm7434        | 0.574180905 | 0.897831331 | 2.46784806  | 0.36381143  | 0.715998827 NA |             |
| Gm17971       | 10.64209081 | 0.8974864   | 0.696462123 | 1.288636339 | 0.197524544    | 0.274329811 |
| Hpn           | 6662.179774 | 0.897384505 | 0.128489137 | 6.984127403 | 2.87E-12       | 2.23E-11    |
| Pdcd5         | 566.2952551 | 0.897215429 | 0.156161702 | 5.745425548 | 9.17E-09       | 4.78E-08    |
| Dalrd3        | 734.4713332 | 0.89703082  | 0.187847786 | 4.775306856 | 1.79E-06       | 6.99E-06    |
| 1600014C10Rik | 2879.378714 | 0.89697913  | 0.220070388 | 4.075873808 | 4.58E-05       | 0.000146252 |
| Fads2         | 2406.16786  | 0.896567896 | 0.19573853  | 4.580436433 | 4.64E-06       | 1.72E-05    |
| Gm8983        | 0.550202076 | 0.896508101 | 2.920557226 | 0.306964744 | 0.758870208 NA |             |
| Nelfcd        | 589.3918488 | 0.895873918 | 0.182469736 | 4.90971235  | 9.12E-07       | 3.70E-06    |
| Shfl          | 2341.273197 | 0.89547725  | 0.258211119 | 3.468004219 | 0.000524339    | 0.0013954   |
| Alg9          | 272.472989  | 0.895432848 | 0.283696461 | 3.156306021 | 0.001597811    | 0.003861566 |
| Cdh18         | 0.927974589 | 0.894779104 | 2.084155423 | 0.429324557 | 0.667687048 NA |             |
| Cyp2g1        | 52.3104974  | 0.894700334 | 0.546126702 | 1.638265132 | 0.101366398    | 0.156134293 |
| Fbxo3         | 1628.069219 | 0.894563466 | 0.150109351 | 5.959412009 | 2.53E-09       | 1.40E-08    |
| Igfbp4        | 18089.74353 | 0.894397501 | 0.248988321 | 3.592126315 | 0.000327991    | 0.00090508  |
| P4hb          | 24135.29209 | 0.894246679 | 0.19850541  | 4.504898285 | 6.64E-06       | 2.41E-05    |
| 1810024B03Rik | 38.15115086 | 0.893950824 | 0.348573283 | 2.564599372 | 0.0103295      | 0.02091417  |
| Pla2g4b       | 36.05043436 | 0.893586665 | 0.354700999 | 2.519267403 | 0.011759931    | 0.023475796 |
| Atg2a         | 986.4594517 | 0.892903038 | 0.200054148 | 4.463306799 | 8.07E-06       | 2.88E-05    |
| Cdc37l1       | 953.4676545 | 0.892675421 | 0.145193965 | 6.1481579   | 7.84E-10       | 4.62E-09    |
| Gm2916        | 0.54980531  | 0.892493236 | 2.921237937 | 0.305518844 | 0.75997102 NA  |             |
| Mrpl10        | 794.4524553 | 0.89225212  | 0.133546005 | 6.681234093 | 2.37E-11       | 1.66E-10    |
| Syndig1l      | 0.575107028 | 0.892197493 | 2.874810351 | 0.310350035 | 0.756294786 NA |             |
| Pid1          | 1450.979018 | 0.892179419 | 0.282567423 | 3.157403669 | 0.001591808    | 0.003848695 |
| Ccno          | 4.737474044 | 0.89217716  | 0.986395128 | 0.904482529 | 0.365739594    | 0.458128479 |
| Trdkh         | 81.87806341 | 0.892023053 | 0.325916873 | 2.736964936 | 0.00620089     | 0.013194306 |
| Mrpl36        | 418.0890633 | 0.891717626 | 0.184985794 | 4.820465442 | 1.43E-06       | 5.66E-06    |
| Fuom          | 315.5229715 | 0.891595946 | 0.200050718 | 4.456849509 | 8.32E-06       | 2.97E-05    |
| Gm2033        | 1.340861223 | 0.891578668 | 1.874085593 | 0.475740634 | 0.634259169 NA |             |
| Slc22a13      | 2.334915767 | 0.891236934 | 1.204423984 | 0.739969434 | 0.459318541    | 0.549814808 |
| Naxd          | 884.2375024 | 0.891195063 | 0.177856113 | 5.010764309 | 5.42E-07       | 2.26E-06    |
| Akr1e1        | 721.8716384 | 0.891126607 | 0.306720555 | 2.905337095 | 0.003668578    | 0.008212989 |
| Tbca          | 760.5675761 | 0.89066751  | 0.142739496 | 6.23981121  | 4.38E-10       | 2.65E-09    |
| Ube2d-ps      | 167.1398841 | 0.890434275 | 0.186157516 | 4.783230328 | 1.73E-06       | 6.74E-06    |
| Birc6         | 1447.543891 | 0.890408196 | 0.177763195 | 5.008956976 | 5.47E-07       | 2.28E-06    |
| Aven          | 206.958515  | 0.890407518 | 0.296434301 | 3.003726344 | 0.002666951    | 0.006139101 |
| Dhfr          | 703.1053996 | 0.890119414 | 0.287293549 | 3.098292375 | 0.001946393    | 0.004611188 |
| Ctso          | 634.5913478 | 0.889884244 | 0.170961458 | 5.205174637 | 1.94E-07       | 8.65E-07    |
| Zfp972        | 12.81892489 | 0.889820565 | 0.588205334 | 1.512772008 | 0.130337581    | 0.193401957 |
| Oard1         | 407.5767118 | 0.889639183 | 0.17639849  | 5.043349196 | 4.57E-07       | 1.93E-06    |
| Ppid          | 789.5068502 | 0.889544652 | 0.195319612 | 4.554302783 | 5.26E-06       | 1.93E-05    |
| Cox19         | 632.8346054 | 0.889539805 | 0.270767374 | 3.28525476  | 0.001018902    | 0.00256463  |
| Pfdn6         | 565.0175869 | 0.889433713 | 0.177514834 | 5.010475425 | 5.43E-07       | 2.27E-06    |
| Slc25a33      | 306.7827515 | 0.888750801 | 0.24189822  | 3.674069204 | 0.000238718    | 0.000676474 |
| Erap1         | 1127.990745 | 0.887975263 | 0.187316346 | 4.740511352 | 2.13E-06       | 8.21E-06    |
| Gm7541        | 0.599166245 | 0.887717737 | 2.485794052 | 0.357116365 | 0.721004693 NA |             |
| Czib          | 455.4065249 | 0.88764282  | 0.14539133  | 6.105197726 | 1.03E-09       | 5.98E-09    |
| Abcd4         | 256.6969418 | 0.886992946 | 0.299729163 | 2.959314791 | 0.00308324     | 0.007017766 |
| Kbtbd8        | 18.62204091 | 0.886802674 | 0.491773069 | 1.803276206 | 0.071344848    | 0.115026193 |
| Leng1         | 178.5320145 | 0.88653224  | 0.187859811 | 4.719116011 | 2.37E-06       | 9.06E-06    |
| Crcp          | 382.8740679 | 0.88648585  | 0.218441267 | 4.05823433  | 4.94E-05       | 0.000156768 |
| Slc22a8       | 2.411976998 | 0.886147162 | 1.237800712 | 0.71590455  | 0.474050289    | 0.564831515 |
| Acnat1        | 306.1954701 | 0.885917251 | 0.257611039 | 3.438972391 | 0.000583927    | 0.001542421 |
| Gm15842       | 0.598686206 | 0.885715184 | 2.486106084 | 0.356266046 | 0.721641335 NA |             |
| Catspere2     | 4.081905064 | 0.885690466 | 0.999615386 | 0.886031246 | 0.37560069     | 0.46766291  |
| Lrrc69        | 0.55881948  | 0.885346856 | 2.901706284 | 0.305112499 | 0.760280472 NA |             |
| Anpep         | 1833.705335 | 0.884780861 | 0.285101731 | 3.103386496 | 0.001913196    | 0.004540112 |
| Ppp1r15b      | 1455.18444  | 0.884619278 | 0.125540636 | 7.046477589 | 1.84E-12       | 1.46E-11    |
| Ascl3         | 0.566766965 | 0.884464797 | 2.478396617 | 0.356869756 | 0.721189312 NA |             |
| Syf2          | 673.3675691 | 0.884267107 | 0.145926961 | 6.05965547  | 1.36E-09       | 7.81E-09    |
| Lymr7         | 37.94834029 | 0.883834283 | 0.395578074 | 2.234285321 | 0.025464306    | 0.046543956 |

|               |             |             |             |             |                |             |
|---------------|-------------|-------------|-------------|-------------|----------------|-------------|
| Vtcn1         | 16.65761513 | 0.883833941 | 0.527608319 | 1.675170594 | 0.093900765    | 0.146354018 |
| MyI4          | 18.05089801 | 0.883829561 | 0.523501643 | 1.688303318 | 0.091353019    | 0.143023809 |
| Abi3bp        | 36.14245771 | 0.883676025 | 0.532040416 | 1.66091898  | 0.09672972     | 0.150090858 |
| Ldlrad4       | 95.2058522  | 0.883547535 | 0.318338561 | 2.775496417 | 0.005511751    | 0.011882186 |
| Gtf3c6        | 398.6800508 | 0.883149717 | 0.204672137 | 4.314948425 | 1.60E-05       | 5.46E-05    |
| Timm13        | 891.3042311 | 0.883038833 | 0.133018569 | 6.638462873 | 3.17E-11       | 2.19E-10    |
| Ivd           | 3184.461275 | 0.882793249 | 0.152093123 | 5.804294335 | 6.46E-09       | 3.42E-08    |
| Crybb3        | 16.90508253 | 0.882701232 | 0.552979756 | 1.596263193 | 0.110430044    | 0.168150357 |
| Rpe           | 462.0309579 | 0.88265396  | 0.197776535 | 4.462885147 | 8.09E-06       | 2.89E-05    |
| C330007P06Rik | 479.9190187 | 0.882653677 | 0.217149155 | 4.064734571 | 4.81E-05       | 0.000152775 |
| B430218F22Rik | 1.168788344 | 0.882649927 | 1.794633888 | 0.491827293 | 0.622841441 NA |             |
| Tpi1          | 5086.533358 | 0.882470721 | 0.12212138  | 7.226177089 | 4.97E-13       | 4.19E-12    |
| Fcor          | 12.60954633 | 0.882158713 | 0.594255178 | 1.484477956 | 0.137682167    | 0.202382669 |
| Calr          | 16612.03888 | 0.882062703 | 0.187949834 | 4.693075194 | 2.69E-06       | 1.03E-05    |
| D8Erd738e     | 1117.416064 | 0.882024082 | 0.163388879 | 5.398311595 | 6.73E-08       | 3.15E-07    |
| Ube2e2        | 200.7814068 | 0.881822377 | 0.198134663 | 4.450621422 | 8.56E-06       | 3.05E-05    |
| Gm10750       | 1.180926593 | 0.881640178 | 1.603317373 | 0.549885002 | 0.582398252 NA |             |
| Klri1         | 0.573942812 | 0.88160934  | 2.468208753 | 0.35718589  | 0.720952648 NA |             |
| Gm9817        | 1.666281697 | 0.881390511 | 1.394450627 | 0.632070074 | 0.527341089    | 0.615508071 |
| Neil1         | 151.9991669 | 0.881374219 | 0.211627769 | 4.164738036 | 3.12E-05       | 0.000101977 |
| 2310039H08Rik | 605.2091484 | 0.880639199 | 0.282276764 | 3.119772194 | 0.00180991     | 0.004317847 |
| Glt1d1        | 721.2083202 | 0.880201569 | 0.32093178  | 2.742643838 | 0.006094675    | 0.012999127 |
| Gm29761       | 0.58380319  | 0.880049399 | 2.501091078 | 0.351866194 | 0.724938613 NA |             |
| Nsun3         | 173.4363668 | 0.879845548 | 0.233002616 | 3.776118761 | 0.000159291    | 0.000465397 |
| Rassf6        | 169.4359446 | 0.879033331 | 0.272284546 | 3.22836292  | 0.001245009    | 0.003083224 |
| Klh5          | 480.4492408 | 0.879006914 | 0.232591824 | 3.779182332 | 0.000157344    | 0.000460104 |
| Slc10a7       | 177.6190804 | 0.878844121 | 0.384915762 | 2.283211568 | 0.022417909    | 0.041618263 |
| Zfp786        | 8.600117115 | 0.877952024 | 0.621637687 | 1.412321104 | 0.157855435    | 0.227386519 |
| Tbc1d8        | 352.8921612 | 0.877686505 | 0.305602383 | 2.871988424 | 0.004078979    | 0.009045062 |
| Pi4kb         | 549.9736075 | 0.877684468 | 0.187169425 | 4.689251297 | 2.74E-06       | 1.04E-05    |
| Gm42669       | 105.6690679 | 0.877383681 | 0.199951555 | 4.38798128  | 1.14E-05       | 4.00E-05    |
| Ube4b         | 879.9254281 | 0.877340004 | 0.156210302 | 5.616402967 | 1.95E-08       | 9.76E-08    |
| P2ry2         | 207.2077657 | 0.877101266 | 0.358105297 | 2.449283139 | 0.014314088    | 0.027917466 |
| Pcsk4         | 430.0217044 | 0.876762211 | 0.319515956 | 2.744032635 | 0.00606895     | 0.012950741 |
| Rxra          | 4903.298562 | 0.876488984 | 0.309473427 | 2.832194651 | 0.00462297     | 0.010130127 |
| Ganc          | 592.7695411 | 0.875966498 | 0.208161244 | 4.208115207 | 2.58E-05       | 8.53E-05    |
| Pak1ip1       | 631.1205485 | 0.875648142 | 0.17122865  | 5.113911382 | 3.16E-07       | 1.36E-06    |
| Atpaf1        | 240.9106942 | 0.875479661 | 0.194515512 | 4.500821835 | 6.77E-06       | 2.45E-05    |
| Pigyl         | 320.386675  | 0.875469833 | 0.187247311 | 4.675473464 | 2.93E-06       | 1.11E-05    |
| D930020B18Rik | 0.48487697  | 0.875301887 | 2.999578118 | 0.291808332 | 0.770433175 NA |             |
| Olfr1216      | 0.629349137 | 0.875024808 | 2.906738018 | 0.301033255 | 0.763389136 NA |             |
| Cntrf         | 18.01344296 | 0.875015572 | 0.548146406 | 1.596317266 | 0.110417977    | 0.168147001 |
| Fsbp          | 11.67150685 | 0.874890233 | 0.658070873 | 1.329477217 | 0.183690577    | 0.258272739 |
| BC064078      | 27.51389277 | 0.874847396 | 0.373507308 | 2.34224974  | 0.019167884    | 0.036187607 |
| Txn2          | 2951.189806 | 0.874576708 | 0.150194342 | 5.822967057 | 5.78E-09       | 3.07E-08    |
| Thap1         | 103.6164664 | 0.874389073 | 0.21557428  | 4.056091807 | 4.99E-05       | 0.000158069 |
| Llph-ps2      | 135.3255055 | 0.874127344 | 0.223264782 | 3.91520479  | 9.03E-05       | 0.000275115 |
| Atg9a         | 1011.443687 | 0.873562783 | 0.219850883 | 3.973433141 | 7.08E-05       | 0.000219391 |
| Mettl22       | 154.9275684 | 0.873182431 | 0.241102765 | 3.621619319 | 0.000292765    | 0.0008146   |
| Rag2          | 0.566619535 | 0.873148507 | 2.478763936 | 0.352251578 | 0.724649599 NA |             |
| Gm3755        | 9.03742017  | 0.872906883 | 0.609180852 | 1.432919108 | 0.151880956    | 0.220213177 |
| AW822252      | 777.9251715 | 0.87249619  | 0.367515457 | 2.37403944  | 0.017594671    | 0.033540641 |
| Zfp101        | 180.5971018 | 0.872364628 | 0.263477327 | 3.310966594 | 0.000929743    | 0.002360426 |
| Ifnar2        | 1576.850301 | 0.872137184 | 0.171264522 | 5.092340044 | 3.54E-07       | 1.51E-06    |
| Pdcd6         | 936.404306  | 0.871951794 | 0.164262402 | 5.308285925 | 1.11E-07       | 5.06E-07    |
| Klhdc7b       | 3.825978784 | 0.871944912 | 1.338794628 | 0.651291015 | 0.514858647    | 0.603541925 |
| Uso1          | 1590.844524 | 0.871797991 | 0.164402332 | 5.302832274 | 1.14E-07       | 5.21E-07    |
| Cmc2          | 117.2857298 | 0.871630095 | 0.325517554 | 2.677674627 | 0.00741352     | 0.015522683 |
| Arl4a         | 530.0207756 | 0.87108428  | 0.206756065 | 4.213101458 | 2.52E-05       | 8.36E-05    |
| Gm11879       | 7.519123381 | 0.871013622 | 0.779538248 | 1.117345587 | 0.263846591    | 0.349390763 |
| C1qbp         | 1559.416889 | 0.870552692 | 0.112436154 | 7.742640271 | 9.74E-15       | 9.71E-14    |
| Fcf1          | 422.0679696 | 0.870437782 | 0.187428724 | 4.644100231 | 3.42E-06       | 1.29E-05    |
| Efcab2        | 51.94937439 | 0.870063762 | 0.397672466 | 2.18789038  | 0.028677588    | 0.051724029 |
| Gtf2h4        | 199.1356157 | 0.86964076  | 0.191317336 | 4.545540816 | 5.48E-06       | 2.01E-05    |
| Rpsa-ps9      | 4.809247027 | 0.869456284 | 0.991581136 | 0.876838267 | 0.380574491    | 0.47254435  |
| Ccp1          | 873.9117924 | 0.86912798  | 0.1447373   | 6.004865206 | 1.91E-09       | 1.08E-08    |



|               |             |             |             |             |                |             |
|---------------|-------------|-------------|-------------|-------------|----------------|-------------|
| Cfb           | 20224.32368 | 0.869123283 | 0.12665521  | 6.862120252 | 6.78E-12       | 5.06E-11    |
| Phactr1       | 11.01921881 | 0.868993689 | 0.738684118 | 1.176407708 | 0.239431993    | 0.322800443 |
| Selenow       | 1387.891212 | 0.868651775 | 0.204780221 | 4.241873403 | 2.22E-05       | 7.42E-05    |
| Adamts13      | 133.650614  | 0.868551595 | 0.32833656  | 2.64530881  | 0.008161639    | 0.016925275 |
| Abhd17c       | 1004.978215 | 0.868535588 | 0.189693127 | 4.578634993 | 4.68E-06       | 1.73E-05    |
| Eif4ebp2      | 3163.323728 | 0.868233319 | 0.171519568 | 5.062007368 | 4.15E-07       | 1.75E-06    |
| Heca          | 588.135445  | 0.868154447 | 0.146009131 | 5.945891453 | 2.75E-09       | 1.52E-08    |
| Dffa          | 309.2541924 | 0.868073009 | 0.196851407 | 4.409788192 | 1.03E-05       | 3.64E-05    |
| Nadk2         | 2199.02176  | 0.867884757 | 0.123880872 | 7.005801166 | 2.46E-12       | 1.92E-11    |
| Uimc1         | 516.6204204 | 0.867676713 | 0.138804698 | 6.251061574 | 4.08E-10       | 2.48E-09    |
| 4930465K10Rik | 0.605895375 | 0.867475517 | 2.484379745 | 0.349171868 | 0.726960285 NA |             |
| Gm48416       | 562.5480604 | 0.867471097 | 0.170873961 | 5.076672248 | 3.84E-07       | 1.63E-06    |
| Tmem70        | 558.4074183 | 0.867458423 | 0.126896639 | 6.835944817 | 8.15E-12       | 6.02E-11    |
| Slc9a2        | 0.704724433 | 0.867432343 | 2.368104765 | 0.366298129 | 0.714142626 NA |             |
| Nr3c2         | 168.360302  | 0.867350254 | 0.262974421 | 3.298230489 | 0.000972962    | 0.002459529 |
| Rasl2-9       | 10.87800567 | 0.866833028 | 0.563314542 | 1.538808186 | 0.123851131    | 0.185260514 |
| Gm4617        | 0.88726373  | 0.866774251 | 2.622624634 | 0.330498784 | 0.741023112 NA |             |
| Sifn3         | 16.93557042 | 0.866711214 | 0.519853877 | 1.667220835 | 0.095470501    | 0.148434209 |
| Tmem135       | 1224.21443  | 0.866558133 | 0.129617572 | 6.685498886 | 2.30E-11       | 1.62E-10    |
| Gm12922       | 0.902338789 | 0.866549009 | 2.281335974 | 0.379842784 | 0.704062121 NA |             |
| Fitm2         | 541.2175742 | 0.866181125 | 0.285474683 | 3.034178424 | 0.002411917    | 0.005610365 |
| Timm29        | 522.3509504 | 0.865956062 | 0.149149157 | 5.805973572 | 6.40E-09       | 3.39E-08    |
| Ccdc162       | 208.2343699 | 0.865757743 | 0.302096146 | 2.86583511  | 0.004159108    | 0.009207178 |
| Tmem234       | 1005.752165 | 0.865631034 | 0.135024266 | 6.410929371 | 1.45E-10       | 9.29E-10    |
| Zfp931        | 64.36567614 | 0.865339008 | 0.285530628 | 3.030634621 | 0.002440404    | 0.005668893 |
| Gm14165       | 0.874686198 | 0.864829903 | 2.316769165 | 0.373291356 | 0.708931609 NA |             |
| Trak1         | 1083.301237 | 0.864819704 | 0.196523255 | 4.400597299 | 1.08E-05       | 3.79E-05    |
| Zfp467        | 561.9681836 | 0.864734374 | 0.245785763 | 3.518244362 | 0.000434412    | 0.001173298 |
| Slc25a39      | 5764.615995 | 0.864336775 | 0.182959357 | 4.72420099  | 2.31E-06       | 8.85E-06    |
| Surf1         | 623.5847161 | 0.864295084 | 0.152639757 | 5.662319585 | 1.49E-08       | 7.57E-08    |
| Mylk4         | 8.820389142 | 0.863712282 | 0.664378197 | 1.300031046 | 0.193590329    | 0.269788925 |
| Bola2         | 419.3274272 | 0.863655401 | 0.252907373 | 3.414907957 | 0.000638036    | 0.001672906 |
| Gm8251        | 2.882344366 | 0.863655193 | 1.321722188 | 0.653431713 | 0.513478       | 0.60237909  |
| Gm4994        | 2.674296184 | 0.863632519 | 1.224563542 | 0.705257415 | 0.480650056    | 0.570939392 |
| Mpp6          | 809.5807046 | 0.863177777 | 0.253677542 | 3.402657441 | 0.000667339    | 0.001738773 |
| Mia3          | 2129.530463 | 0.863003014 | 0.154177932 | 5.597448363 | 2.18E-08       | 1.08E-07    |
| Olfr432       | 6.562023819 | 0.862816598 | 0.659377324 | 1.308532408 | 0.19069279     | 0.266513419 |
| Tmem242       | 540.1302256 | 0.862753987 | 0.178862682 | 4.823555027 | 1.41E-06       | 5.58E-06    |
| Gm5424        | 2.663846363 | 0.862398959 | 1.391048643 | 0.619963194 | 0.535282019    | 0.622475298 |
| Ndp           | 0.611366036 | 0.862321873 | 2.481311908 | 0.347526593 | 0.728195744 NA |             |
| Slc12a9       | 451.6068786 | 0.862258372 | 0.183463561 | 4.699888988 | 2.60E-06       | 9.93E-06    |
| Arl15         | 144.5072787 | 0.861934291 | 0.256220224 | 3.364036905 | 0.000768113    | 0.001979859 |
| Lrrc17        | 4.628564398 | 0.861878592 | 0.866547761 | 0.994611758 | 0.319925126    | 0.411318518 |
| Ppp4r3a       | 1547.54619  | 0.861631265 | 0.233673217 | 3.687334296 | 0.000226616    | 0.000644427 |
| Ern1          | 1244.448253 | 0.861254337 | 0.178500057 | 4.824952733 | 1.40E-06       | 5.54E-06    |
| Dap           | 3313.372071 | 0.861169867 | 0.120469514 | 7.148446426 | 8.78E-13       | 7.22E-12    |
| Dnajb11       | 1604.10652  | 0.860747059 | 0.172869252 | 4.979179647 | 6.39E-07       | 2.64E-06    |
| Pls3          | 1093.315802 | 0.860745056 | 0.165417598 | 5.203467274 | 1.96E-07       | 8.71E-07    |
| Mavs          | 925.0602811 | 0.860663952 | 0.23053092  | 3.733399201 | 0.000188913    | 0.000545032 |
| Mrto4         | 346.2526951 | 0.860548961 | 0.146721473 | 5.865187569 | 4.49E-09       | 2.42E-08    |
| Eif2b4        | 431.6291166 | 0.860425694 | 0.196054623 | 4.388703918 | 1.14E-05       | 3.99E-05    |
| Ogfrl1        | 291.8828589 | 0.860168879 | 0.208966992 | 4.116290672 | 3.85E-05       | 0.00012422  |
| Cutal         | 667.0503248 | 0.859836362 | 0.276423818 | 3.110572631 | 0.00186725     | 0.00444345  |
| Nemp1         | 217.1880258 | 0.859110501 | 0.23231122  | 3.698101623 | 0.000217218    | 0.000620498 |
| Ttc32         | 262.3371508 | 0.858941346 | 0.248419113 | 3.457629872 | 0.00054495     | 0.001446636 |
| Grip2         | 13202.63834 | 0.85821843  | 0.38163863  | 2.248772434 | 0.024526978    | 0.045072321 |
| Zfp811        | 4.019963384 | 0.858209672 | 1.200205401 | 0.715052333 | 0.474576706    | 0.565379713 |
| Rpp25l        | 220.2702673 | 0.858086576 | 0.208063142 | 4.124164274 | 3.72E-05       | 0.00012032  |
| Naa35         | 471.8535138 | 0.858056995 | 0.215528317 | 3.981179854 | 6.86E-05       | 0.000212787 |
| Gm16470       | 1.433022375 | 0.857548688 | 1.768161357 | 0.484994588 | 0.627680185 NA |             |
| Cisd3         | 757.3765163 | 0.856946783 | 0.26788703  | 3.198911065 | 0.001379477    | 0.003385737 |
| Bcs1l         | 227.0581515 | 0.856909699 | 0.204380326 | 4.192721081 | 2.76E-05       | 9.09E-05    |
| Klh3          | 187.7106923 | 0.856085864 | 0.220796775 | 3.877257093 | 0.000105641    | 0.000318135 |
| Atg2b         | 653.840601  | 0.855567254 | 0.289463281 | 2.955702187 | 0.003119582    | 0.007092908 |
| Olfr1213      | 6.022794473 | 0.855317096 | 0.699899061 | 1.222057785 | 0.221685776    | 0.302513336 |
| Acly          | 2632.67038  | 0.854770476 | 0.115841773 | 7.378775829 | 1.60E-13       | 1.41E-12    |

|           |             |             |             |             |             |             |
|-----------|-------------|-------------|-------------|-------------|-------------|-------------|
| Coq7      | 453.6984149 | 0.854247481 | 0.161380425 | 5.293377328 | 1.20E-07    | 5.46E-07    |
| Slc17a1   | 112.9798576 | 0.854148858 | 0.313134202 | 2.727740545 | 0.006376974 | 0.013538563 |
| Rab5b     | 1425.929227 | 0.853978762 | 0.143118033 | 5.966954316 | 2.42E-09    | 1.34E-08    |
| Ppp1r32   | 3.724187517 | 0.852678327 | 0.978477432 | 0.87143382  | 0.383517326 | 0.475644069 |
| Cidec     | 44.84415827 | 0.852547572 | 0.444903916 | 1.916250995 | 0.055333155 | 0.092040163 |
| Vwa3b     | 10.28540083 | 0.852377829 | 0.620676311 | 1.373304917 | 0.169657575 | 0.241469555 |
| Timm44    | 801.7992995 | 0.852175197 | 0.110999647 | 7.677278446 | 1.63E-14    | 1.58E-13    |
| Cbx2      | 160.1280829 | 0.852139659 | 0.233289625 | 3.652711343 | 0.000259486 | 0.000730227 |
| Fth1      | 23899.02097 | 0.851898425 | 0.150308111 | 5.667680986 | 1.45E-08    | 7.35E-08    |
| Siglecg   | 16.23409145 | 0.851636838 | 0.754546904 | 1.128673159 | 0.259035736 | 0.343982024 |
| Dnajc13   | 635.7957074 | 0.851620813 | 0.200125039 | 4.25544359  | 2.09E-05    | 7.01E-05    |
| Prpf4b    | 1320.281017 | 0.850755831 | 0.160481642 | 5.30126573  | 1.15E-07    | 5.25E-07    |
| Psd       | 16.17902794 | 0.850730419 | 0.624594342 | 1.362052715 | 0.173181249 | 0.245730961 |
| Plpp3     | 1759.334491 | 0.850647563 | 0.209606585 | 4.058305532 | 4.94E-05    | 0.000156749 |
| Fkbp8     | 4248.035246 | 0.850629838 | 0.149919326 | 5.673917159 | 1.40E-08    | 7.10E-08    |
| Gm10033   | 164.7274877 | 0.850417554 | 0.235425359 | 3.612259778 | 0.00030354  | 0.000841834 |
| Ypel3     | 1007.073176 | 0.850291726 | 0.184458602 | 4.609661546 | 4.03E-06    | 1.50E-05    |
| Simc1     | 254.1222005 | 0.850118799 | 0.213571615 | 3.980485879 | 6.88E-05    | 0.000213331 |
| Anp32a    | 2126.901718 | 0.850045845 | 0.265907977 | 3.196766999 | 0.001389771 | 0.003408549 |
| Mzt2      | 270.7386595 | 0.849377837 | 0.264132389 | 3.21572769  | 0.001301142 | 0.003212902 |
| Prdm10    | 198.0747234 | 0.849023634 | 0.18285868  | 4.64305896  | 3.43E-06    | 1.29E-05    |
| Gm18600   | 0.966021152 | 0.848948163 | 1.963109342 | 0.432450778 | 0.665413819 | NA          |
| Foxq1     | 609.632584  | 0.848085123 | 0.307510464 | 2.757906554 | 0.005817282 | 0.012474595 |
| Ppp1r15a  | 517.8050418 | 0.847748032 | 0.23737593  | 3.571331062 | 0.000355172 | 0.000974407 |
| Gm3854    | 8.016173384 | 0.847688616 | 0.663102939 | 1.27836655  | 0.201120213 | 0.278642616 |
| Cdk10     | 461.8603164 | 0.847618257 | 0.178797204 | 4.740668409 | 2.13E-06    | 8.21E-06    |
| Gm9157    | 1.313431576 | 0.847352603 | 2.083762688 | 0.406645444 | 0.684268415 | NA          |
| Slc22a4   | 83.85994847 | 0.84705052  | 0.442933538 | 1.91236483  | 0.055829416 | 0.092729918 |
| Tubg1     | 510.4440456 | 0.846765885 | 0.169155375 | 5.005846752 | 5.56E-07    | 2.32E-06    |
| Mrpl57    | 451.3308741 | 0.846720536 | 0.155664337 | 5.439399635 | 5.35E-08    | 2.53E-07    |
| Tef       | 2023.979213 | 0.846629822 | 0.364758536 | 2.321069252 | 0.020283107 | 0.038052867 |
| Izumo4    | 280.9495811 | 0.846626402 | 0.230493798 | 3.673098405 | 0.000239627 | 0.000678711 |
| Zfp672    | 219.263412  | 0.846425819 | 0.198616291 | 4.261613266 | 2.03E-05    | 6.83E-05    |
| Ppara     | 613.3580701 | 0.846163541 | 0.377852259 | 2.239403156 | 0.025129696 | 0.046021169 |
| Lman1     | 3104.175549 | 0.84557334  | 0.210518205 | 4.016628116 | 5.90E-05    | 0.000184875 |
| Gtf2b     | 408.5433988 | 0.845490936 | 0.205830511 | 4.10770459  | 4.00E-05    | 0.000128612 |
| Gm20111   | 0.243037035 | 0.845386342 | 3.641137392 | 0.232176447 | 0.816400971 | NA          |
| Gm10212   | 0.243024129 | 0.845173738 | 3.641139413 | 0.232117929 | 0.81644642  | NA          |
| Gm45574   | 0.24301971  | 0.845100901 | 3.641140106 | 0.232097881 | 0.816461991 | NA          |
| Smim1011  | 1209.841168 | 0.844957444 | 0.135167569 | 6.251184753 | 4.07E-10    | 2.47E-09    |
| Tpi-rs11  | 0.329305718 | 0.84494397  | 3.641141598 | 0.232054686 | 0.81649554  | NA          |
| Apex2     | 193.754746  | 0.844764693 | 0.233154794 | 3.623192461 | 0.000290989 | 0.000810453 |
| Olfir705  | 4.356119605 | 0.844516104 | 0.953080209 | 0.886091324 | 0.375568318 | 0.467656759 |
| Wipi2     | 1303.626007 | 0.844268462 | 0.140593905 | 6.005014655 | 1.91E-09    | 1.08E-08    |
| Ubl7      | 545.4501951 | 0.844249547 | 0.159526134 | 5.292233469 | 1.21E-07    | 5.49E-07    |
| Tada2b    | 296.2426069 | 0.844131227 | 0.202433117 | 4.169926542 | 3.05E-05    | 9.98E-05    |
| Gm44431   | 0.242939753 | 0.843779472 | 3.641152671 | 0.231734165 | 0.816744494 | NA          |
| Gm2026    | 57.47235014 | 0.843663191 | 0.402182512 | 2.097712271 | 0.03593057  | 0.063070877 |
| Krt35     | 0.704454772 | 0.843476039 | 2.378746561 | 0.354588443 | 0.722897936 | NA          |
| Gm5837    | 6.346262427 | 0.843363605 | 0.82086964  | 1.027402603 | 0.304230926 | 0.394382848 |
| Gm28956   | 0.24289858  | 0.843096388 | 3.641159168 | 0.23154615  | 0.816890537 | NA          |
| Kcng4     | 0.321121197 | 0.84301912  | 3.409286977 | 0.247271387 | 0.804698201 | NA          |
| Nudt13    | 322.893218  | 0.842857492 | 0.343654205 | 2.452632561 | 0.014181512 | 0.027681064 |
| Helb      | 225.0304182 | 0.84275219  | 0.219364578 | 3.841787944 | 0.000122141 | 0.000363334 |
| Vps25     | 1345.814199 | 0.84267255  | 0.124919107 | 6.745745894 | 1.52E-11    | 1.09E-10    |
| Rps16-ps3 | 0.242862023 | 0.84248836  | 3.641164951 | 0.231378795 | 0.817020537 | NA          |
| Slc35d1   | 2280.381451 | 0.842444554 | 0.244331835 | 3.44795247  | 0.000564853 | 0.001495747 |
| Ttll5     | 150.4845202 | 0.842237585 | 0.23831841  | 3.534085282 | 0.000409189 | 0.001110632 |
| Gm48498   | 19.57971014 | 0.841707821 | 0.5087496   | 1.654463849 | 0.098033303 | 0.151782013 |
| Ggnbp2    | 1469.915853 | 0.841434682 | 0.170268441 | 4.941812326 | 7.74E-07    | 3.17E-06    |
| Pdcd2     | 275.661786  | 0.841256223 | 0.214746498 | 3.917438603 | 8.95E-05    | 0.000272935 |
| Gapdh     | 30393.33998 | 0.841162747 | 0.143903708 | 5.845316702 | 5.06E-09    | 2.70E-08    |
| Abca6     | 1372.043263 | 0.841099172 | 0.305319181 | 2.754819296 | 0.005872456 | 0.012575509 |
| Mapkapk5  | 512.1303981 | 0.841029882 | 0.19249883  | 4.369012943 | 1.25E-05    | 4.33E-05    |
| Hoxa1     | 4.635784396 | 0.840872092 | 0.808940567 | 1.039473264 | 0.298584686 | 0.388155538 |
| Pik3c2g   | 103.3460063 | 0.840864072 | 0.367829708 | 2.286014568 | 0.022253406 | 0.041348891 |

|               |             |             |             |             |                |             |
|---------------|-------------|-------------|-------------|-------------|----------------|-------------|
| Mafg          | 2033.497167 | 0.840759314 | 0.190665913 | 4.409594253 | 1.04E-05       | 3.65E-05    |
| Gas2          | 620.3477011 | 0.840752446 | 0.294725957 | 2.852658292 | 0.004335521    | 0.009564178 |
| Rp9           | 578.0388021 | 0.840355361 | 0.145449867 | 5.777628923 | 7.58E-09       | 3.98E-08    |
| Gm19195       | 0.242731584 | 0.840307116 | 3.641185703 | 0.230778429 | 0.81748694 NA  |             |
| Dmkn          | 0.749210266 | 0.840263085 | 2.429740851 | 0.345824158 | 0.729474868 NA |             |
| Fgf15         | 0.242691621 | 0.839635122 | 3.641192097 | 0.23059347  | 0.817630641 NA |             |
| H3c14         | 100.3539016 | 0.839356442 | 0.408843299 | 2.053002811 | 0.040072305    | 0.069539155 |
| Spns2         | 530.8583001 | 0.839104003 | 0.261913243 | 3.203747908 | 0.001356512    | 0.003333691 |
| Gm4835        | 0.72066845  | 0.838530875 | 2.103327489 | 0.398668719 | 0.69013732 NA  |             |
| Gm16209       | 0.24160195  | 0.838503302 | 3.641202869 | 0.230281951 | 0.817872685 NA |             |
| Immmp1l       | 332.9647377 | 0.838198773 | 0.170951881 | 4.90312695  | 9.43E-07       | 3.82E-06    |
| Klf10         | 374.6884214 | 0.837927051 | 0.235719943 | 3.554756718 | 0.000378329    | 0.001033946 |
| Pramel6       | 0.328247839 | 0.837507828 | 3.641212344 | 0.230007961 | 0.818085583 NA |             |
| Sirt2         | 999.8720016 | 0.837385528 | 0.129647371 | 6.458947245 | 1.05E-10       | 6.87E-10    |
| Mif4gd        | 688.1583753 | 0.836988081 | 0.212685243 | 3.935336872 | 8.31E-05       | 0.000254971 |
| Gm21319       | 4.476946852 | 0.836951569 | 0.94622667  | 0.88451488  | 0.376418334    | 0.468475672 |
| Gm8756        | 0.719705236 | 0.836950155 | 2.103796745 | 0.397828429 | 0.69075666 NA  |             |
| Mettl5        | 250.4553482 | 0.836745742 | 0.18292203  | 4.574330074 | 4.78E-06       | 1.76E-05    |
| Mei4          | 2.119610281 | 0.836513243 | 1.337310448 | 0.625519111 | 0.531630409    | 0.619369591 |
| Mrpl4         | 628.4828799 | 0.836408029 | 0.150965826 | 5.540379908 | 3.02E-08       | 1.47E-07    |
| Olfr370       | 1.270517514 | 0.836377021 | 2.038611101 | 0.41026806  | 0.68160932 NA  |             |
| Ippk          | 143.7361744 | 0.836220539 | 0.235933044 | 3.544312927 | 0.000393638    | 0.001071489 |
| Cpn2          | 4176.807034 | 0.835934331 | 0.230154313 | 3.632060252 | 0.000281167    | 0.000785408 |
| Gm14434       | 43.80565102 | 0.835821698 | 0.807332737 | 1.035287757 | 0.300534546    | 0.39017066  |
| Gm6333        | 0.241442465 | 0.835745466 | 3.641229123 | 0.2295229   | 0.818462524 NA |             |
| Zfp473        | 62.11558994 | 0.835647829 | 0.394407319 | 2.11874321  | 0.034112174    | 0.060269909 |
| Tbc1d32       | 116.0588967 | 0.835463019 | 0.224058874 | 3.728765579 | 0.00019242     | 0.000554211 |
| Tommm6        | 1373.686722 | 0.835289959 | 0.130853656 | 6.383390316 | 1.73E-10       | 1.10E-09    |
| Pgam2         | 0.327883448 | 0.834916898 | 3.641237013 | 0.229294851 | 0.818639755 NA |             |
| 2010315B03Rik | 318.2108405 | 0.834901223 | 0.240035284 | 3.478243733 | 0.000504711    | 0.001347582 |
| Itpk1         | 344.3808381 | 0.834674335 | 0.176203394 | 4.736993528 | 2.17E-06       | 8.35E-06    |
| Atp6v0a1      | 809.564139  | 0.834632636 | 0.162376474 | 5.140108145 | 2.75E-07       | 1.19E-06    |
| Acsm2         | 77.98277082 | 0.834606441 | 1.147441274 | 0.727363098 | 0.467003554    | 0.557565417 |
| Rps11-ps1     | 1.227228632 | 0.834439596 | 1.880785743 | 0.44366542  | 0.6572845 NA   |             |
| Cdc34         | 1092.228898 | 0.834382111 | 0.141399318 | 5.900892033 | 3.62E-09       | 1.97E-08    |
| Id3           | 828.5050657 | 0.833982794 | 0.267028927 | 3.123192697 | 0.001789006    | 0.004275157 |
| Mrps16        | 415.751779  | 0.833809592 | 0.16975769  | 4.911763291 | 9.03E-07       | 3.67E-06    |
| Cnih1         | 884.4448002 | 0.833730997 | 0.147848716 | 5.639081771 | 1.71E-08       | 8.61E-08    |
| Tmem64        | 525.441256  | 0.833725515 | 0.204213157 | 4.082623893 | 4.45E-05       | 0.000142243 |
| Vmn1r208      | 31.86032823 | 0.833621989 | 0.413671293 | 2.015179694 | 0.043885824    | 0.075297497 |
| Prop          | 190.023642  | 0.832903271 | 0.246401836 | 3.380264057 | 0.000724162    | 0.001874225 |
| Mthfs1        | 356.7664959 | 0.832674482 | 0.19506485  | 4.268705927 | 1.97E-05       | 6.63E-05    |
| Gm8489        | 0.242261024 | 0.83227935  | 3.641262135 | 0.228568919 | 0.819203984 NA |             |
| Gpn2          | 186.2230726 | 0.832107283 | 0.180176463 | 4.618290689 | 3.87E-06       | 1.45E-05    |
| Gm15789       | 0.241229114 | 0.832007789 | 3.641264722 | 0.228494178 | 0.819262082 NA |             |
| Gstp2         | 124.2516837 | 0.831620695 | 0.555796754 | 1.496267635 | 0.134583926    | 0.198665405 |
| Rprm          | 0.32741211  | 0.831542511 | 3.641269155 | 0.22836612  | 0.819361626 NA |             |
| Abcb7         | 613.7476809 | 0.831498303 | 0.213309252 | 3.898088322 | 9.70E-05       | 0.000293899 |
| Tmem41b       | 553.3249727 | 0.831317637 | 0.146125356 | 5.689071755 | 1.28E-08       | 6.53E-08    |
| Olfr1138      | 0.242179321 | 0.830859025 | 3.641275668 | 0.228178007 | 0.819507858 NA |             |
| Brcc3         | 429.0784163 | 0.830664838 | 0.243487505 | 3.411529632 | 0.000645995    | 0.001691173 |
| Ssr4          | 1640.751624 | 0.830623298 | 0.226146009 | 3.672951386 | 0.000239765    | 0.000678989 |
| Gm6741        | 168.7352354 | 0.830473432 | 0.286498839 | 2.898697371 | 0.003747164    | 0.008372431 |
| Spib          | 10.22082103 | 0.830418706 | 0.679931863 | 1.221326358 | 0.221962477    | 0.302842442 |
| Krt86         | 0.242144909 | 0.830258359 | 3.641281392 | 0.228012688 | 0.819636377 NA |             |
| Gm3739        | 0.242141235 | 0.830194141 | 3.641282004 | 0.227995014 | 0.819650117 NA |             |
| Gm9077        | 0.32720736  | 0.830068446 | 3.641283201 | 0.227960419 | 0.819677011 NA |             |
| Psma6         | 1459.37681  | 0.829890276 | 0.13841741  | 5.9955628   | 2.03E-09       | 1.14E-08    |
| Oca2          | 0.327156347 | 0.829700401 | 3.641286709 | 0.227859124 | 0.819755761 NA |             |
| Psma2         | 1584.975165 | 0.829665251 | 0.153736392 | 5.396674386 | 6.79E-08       | 3.18E-07    |
| Zfp536        | 0.242110547 | 0.829657127 | 3.641287121 | 0.227847214 | 0.81976502 NA  |             |
| Sic15a2       | 51.02967504 | 0.829622805 | 0.820004329 | 1.011729787 | 0.311667269    | 0.402553497 |
| Col9a1        | 0.241089412 | 0.829529334 | 3.641288339 | 0.227812043 | 0.819792364 NA |             |
| Fam160a1      | 114.6872541 | 0.829491767 | 0.287518786 | 2.885000242 | 0.003914134    | 0.008708361 |
| Olfr1110      | 0.242088499 | 0.829270567 | 3.641290806 | 0.227740823 | 0.819847734 NA |             |
| Tmem74        | 0.327091636 | 0.829233083 | 3.641291163 | 0.227730507 | 0.819855754 NA |             |

|               |             |             |             |             |             |    |             |
|---------------|-------------|-------------|-------------|-------------|-------------|----|-------------|
| Vmn1r199      | 0.241044616 | 0.828729265 | 3.641295965 | 0.227591844 | 0.819963561 | NA |             |
| Srebf1        | 3509.604245 | 0.828704279 | 0.294830205 | 2.810784864 | 0.004942082 |    | 0.010757484 |
| Psma3         | 2025.329236 | 0.828679242 | 0.197819226 | 4.189073313 | 2.80E-05    |    | 9.22E-05    |
| Tasor         | 675.1794055 | 0.828374905 | 0.241950413 | 3.42373834  | 0.000617661 |    | 0.001622727 |
| Cd164         | 4916.318334 | 0.828295918 | 0.145397262 | 5.696777961 | 1.22E-08    |    | 6.26E-08    |
| Zfp236        | 551.3583435 | 0.828037947 | 0.354481835 | 2.3359108   | 0.019495891 |    | 0.036741759 |
| Clec9a        | 44.60983465 | 0.828030515 | 0.510459543 | 1.622127604 | 0.104776029 |    | 0.160602566 |
| Slc6a1        | 1.551183521 | 0.827678691 | 1.541364679 | 0.53697785  | 0.591282915 | NA |             |
| Tmem102       | 184.2191528 | 0.827639234 | 0.246562058 | 3.356717745 | 0.000788736 |    | 0.002026582 |
| Col13a1       | 44.59740384 | 0.82741337  | 0.464586063 | 1.780968987 | 0.074917517 |    | 0.120061184 |
| Zfp933        | 110.6945807 | 0.827394048 | 0.215167119 | 3.845355417 | 0.000120378 |    | 0.000358526 |
| Ccdc167       | 125.0925944 | 0.827384105 | 0.276939455 | 2.987599242 | 0.00281178  |    | 0.006448974 |
| Stk38l        | 296.8436826 | 0.827317748 | 0.148401358 | 5.574866441 | 2.48E-08    |    | 1.23E-07    |
| Nsun7         | 13.22297148 | 0.827294885 | 0.598125327 | 1.383146386 | 0.166619985 |    | 0.237741673 |
| Spsb2         | 270.8851955 | 0.827153359 | 0.173711369 | 4.761653557 | 1.92E-06    |    | 7.43E-06    |
| Asb13         | 672.1170516 | 0.826751727 | 0.192273795 | 4.299866902 | 1.71E-05    |    | 5.82E-05    |
| Cnm1          | 5.63487884  | 0.826484733 | 0.812360753 | 1.01738634  | 0.308969678 |    | 0.399583907 |
| Mcoln1        | 658.3792827 | 0.826391636 | 0.163991479 | 5.039235222 | 4.67E-07    |    | 1.97E-06    |
| Grb7          | 2134.414744 | 0.826005175 | 0.193593664 | 4.266695284 | 1.98E-05    |    | 6.69E-05    |
| Dgkq          | 717.8539758 | 0.825870895 | 0.245096626 | 3.36957268  | 0.000752848 |    | 0.001943158 |
| Yipf1         | 425.3466849 | 0.825505927 | 0.149877145 | 5.507884002 | 3.63E-08    |    | 1.75E-07    |
| Mob3b         | 777.2684771 | 0.825478538 | 0.164237233 | 5.026135199 | 5.00E-07    |    | 2.10E-06    |
| Sqstm1        | 7997.640935 | 0.825435897 | 0.17274403  | 4.778375811 | 1.77E-06    |    | 6.89E-06    |
| Chmp2a        | 1282.140899 | 0.825209081 | 0.103873112 | 7.944395479 | 1.95E-15    |    | 2.08E-14    |
| Tyw3          | 59.97816841 | 0.825072559 | 0.487870164 | 1.691172406 | 0.09080388  |    | 0.142347084 |
| Gm7497        | 1.499719014 | 0.82500439  | 1.517072678 | 0.54381336  | 0.586569914 | NA |             |
| Gm45140       | 226.1608005 | 0.824933506 | 0.227538083 | 3.625474451 | 0.000288431 |    | 0.000803855 |
| Arm1c1        | 460.008963  | 0.824739445 | 0.177312504 | 4.651332689 | 3.30E-06    |    | 1.24E-05    |
| Psm1b4        | 1986.071763 | 0.824589456 | 0.232405614 | 3.548061699 | 0.000388077 |    | 0.001057535 |
| Cops6         | 1197.676834 | 0.82452761  | 0.178515773 | 4.618794153 | 3.86E-06    |    | 1.44E-05    |
| Gm13886       | 0.890098756 | 0.824476869 | 2.316032647 | 0.355986722 | 0.721850509 | NA |             |
| Coa4          | 96.91756559 | 0.824374157 | 0.249780364 | 3.300396167 | 0.000965484 |    | 0.002442799 |
| Ndufaf8       | 205.8352591 | 0.824355001 | 0.197157159 | 4.181207556 | 2.90E-05    |    | 9.53E-05    |
| Amfr          | 3905.284716 | 0.824067842 | 0.151450193 | 5.44118055  | 5.29E-08    |    | 2.51E-07    |
| Rtf2          | 1260.994617 | 0.823894719 | 0.189398934 | 4.350049395 | 1.36E-05    |    | 4.70E-05    |
| Olf1r243      | 2.47003087  | 0.823804919 | 1.215254988 | 0.677886474 | 0.497843677 |    | 0.587555486 |
| Kptn          | 220.1012957 | 0.823777651 | 0.180704152 | 4.558709033 | 5.15E-06    |    | 1.89E-05    |
| Ggcx          | 863.5178293 | 0.823604713 | 0.202881286 | 4.059540084 | 4.92E-05    |    | 0.000155981 |
| Tnr           | 2.028058261 | 0.823338833 | 1.306375816 | 0.630246536 | 0.528533297 |    | 0.616477534 |
| Chkb          | 1356.645009 | 0.823274693 | 0.172280572 | 4.778685619 | 1.76E-06    |    | 6.88E-06    |
| Dnajc30       | 367.3824958 | 0.823250635 | 0.188202248 | 4.37428693  | 1.22E-05    |    | 4.24E-05    |
| 5-Mar         | 1313.120776 | 0.822881332 | 0.128581777 | 6.399673042 | 1.56E-10    |    | 9.97E-10    |
| Ube2f         | 582.8009555 | 0.822733497 | 0.1969374   | 4.17763968  | 2.95E-05    |    | 9.67E-05    |
| Oplah         | 1899.969765 | 0.822291299 | 0.214891424 | 3.826543124 | 0.000129955 |    | 0.000384966 |
| Gm4759        | 0.862641128 | 0.821172646 | 2.626644029 | 0.312631875 | 0.754560359 | NA |             |
| Zfp729b       | 133.6951692 | 0.821160028 | 0.247511357 | 3.317666051 | 0.000907729 |    | 0.002310387 |
| Arhgef9       | 70.87590346 | 0.820351583 | 0.411991349 | 1.99118643  | 0.046460395 |    | 0.079229451 |
| Mtf1          | 220.5518256 | 0.82024571  | 0.197009855 | 4.163475532 | 3.13E-05    |    | 0.000102484 |
| Metap1d       | 1141.651427 | 0.820045271 | 0.155376225 | 5.277804059 | 1.31E-07    |    | 5.92E-07    |
| Itfg1         | 968.5995209 | 0.819875064 | 0.161907397 | 5.063851792 | 4.11E-07    |    | 1.74E-06    |
| Dennd5b       | 1148.185226 | 0.819694817 | 0.17572908  | 4.664537112 | 3.09E-06    |    | 1.17E-05    |
| Rgl3          | 543.2500828 | 0.819661729 | 0.316695007 | 2.588173828 | 0.009648628 |    | 0.019657003 |
| Adh6a         | 1.198125799 | 0.819412135 | 2.610939903 | 0.313837992 | 0.753644088 | NA |             |
| Gm47692       | 0.730883777 | 0.819379496 | 2.100542092 | 0.390080017 | 0.696477378 | NA |             |
| Akap8l        | 1072.397225 | 0.819377784 | 0.319151056 | 2.567366671 | 0.010247419 |    | 0.020770182 |
| Olf1r374      | 24.910551   | 0.819325828 | 0.528615041 | 1.549948005 | 0.121153996 |    | 0.181816314 |
| Rufy3         | 1043.409348 | 0.818654555 | 0.195285588 | 4.192088957 | 2.76E-05    |    | 9.11E-05    |
| Ociad1        | 1838.920004 | 0.818449791 | 0.152400543 | 5.370386334 | 7.86E-08    |    | 3.66E-07    |
| Psmc5         | 1442.482656 | 0.818190501 | 0.130085814 | 6.289621276 | 3.18E-10    |    | 1.96E-09    |
| Akip1         | 353.9876143 | 0.818106797 | 0.240647915 | 3.399600596 | 0.000674844 |    | 0.001756984 |
| A1cf          | 783.8823318 | 0.81809593  | 0.252934932 | 3.234412591 | 0.001218932 |    | 0.003024357 |
| Ankzf1        | 587.1198985 | 0.817948575 | 0.246219319 | 3.322032481 | 0.000893643 |    | 0.002277594 |
| Slc25a17      | 1002.374203 | 0.817637602 | 0.133030415 | 6.146245573 | 7.93E-10    |    | 4.67E-09    |
| Elac2         | 427.8562248 | 0.817503314 | 0.193735568 | 4.219686264 | 2.45E-05    |    | 8.14E-05    |
| Olf1r418      | 1.778529018 | 0.81733711  | 1.504089707 | 0.543409816 | 0.586847669 |    | 0.669874728 |
| 2610528J11Rik | 212.8460006 | 0.817139549 | 0.213035106 | 3.835703717 | 0.000125205 |    | 0.000371994 |

|           |             |             |             |             |             |    |             |
|-----------|-------------|-------------|-------------|-------------|-------------|----|-------------|
| Olf1030   | 0.727259204 | 0.817043568 | 2.101205371 | 0.388845174 | 0.697390681 | NA |             |
| Edrf1     | 312.9613236 | 0.817008649 | 0.204685705 | 3.991527634 | 6.56E-05    |    | 0.000204343 |
| Rnf11     | 1240.375455 | 0.816949558 | 0.205119281 | 3.982802371 | 6.81E-05    |    | 0.000211493 |
| B4galnt2  | 1.729740076 | 0.816612698 | 1.773811577 | 0.460371726 | 0.645249425 |    | 0.721393613 |
| Rps13-ps1 | 13.93566451 | 0.816467873 | 2.224928519 | 0.366963642 | 0.713646138 |    | 0.778706182 |
| Olf1921   | 1.621548254 | 0.816182623 | 1.612719841 | 0.506090768 | 0.612792931 | NA |             |
| Gm10762   | 79.75021619 | 0.815922221 | 0.305390928 | 2.671730387 | 0.007546125 |    | 0.015777084 |
| Smarca2   | 1652.273783 | 0.815396847 | 0.159847586 | 5.101089525 | 3.38E-07    |    | 1.45E-06    |
| Lsm7      | 345.1332224 | 0.815324156 | 0.180195158 | 4.524672947 | 6.05E-06    |    | 2.20E-05    |
| Lingo4    | 17.9926134  | 0.815242061 | 0.467921212 | 1.742263527 | 0.081462342 |    | 0.12928412  |
| Gm14288   | 132.1578494 | 0.814745591 | 0.279560291 | 2.914382399 | 0.003563931 |    | 0.007996053 |
| Gm10110   | 2.988912216 | 0.814077994 | 1.233327171 | 0.660066537 | 0.509211132 |    | 0.598733111 |
| Slc22a5   | 374.6282899 | 0.813715693 | 0.222246941 | 3.661313358 | 0.000250926 |    | 0.000707773 |
| Acad9     | 676.698268  | 0.813465731 | 0.160552541 | 5.066663707 | 4.05E-07    |    | 1.72E-06    |
| Sun2      | 1194.995797 | 0.813441474 | 0.22983506  | 3.539240159 | 0.000401281 |    | 0.001090726 |
| Ptpn3     | 482.620475  | 0.813415704 | 0.183944042 | 4.422082372 | 9.78E-06    |    | 3.46E-05    |
| Olf1219   | 4.965506881 | 0.8133075   | 0.828457456 | 0.981713056 | 0.326241232 |    | 0.417831907 |
| Olf1085   | 2.161947185 | 0.813242748 | 1.167079039 | 0.696818914 | 0.485916128 |    | 0.576271176 |
| Ddx3y     | 724.5179445 | 0.813088134 | 0.239522618 | 3.394619432 | 0.000687241 |    | 0.001786532 |
| Als2      | 1069.618456 | 0.813020253 | 0.147849526 | 5.498970982 | 3.82E-08    |    | 1.84E-07    |
| Gm15823   | 1.768812518 | 0.812641314 | 1.470121006 | 0.552771718 | 0.580419737 |    | 0.663915437 |
| Crls1     | 691.7419894 | 0.812298737 | 0.192014026 | 4.230413541 | 2.33E-05    |    | 7.79E-05    |
| Chp1      | 3903.179601 | 0.811952557 | 0.218689816 | 3.712804612 | 0.000204975 |    | 0.000587692 |
| Thpo      | 382.7420825 | 0.811820703 | 0.180391    | 4.50033928  | 6.78E-06    |    | 2.46E-05    |
| Ccdc73    | 13.43305494 | 0.811709422 | 0.580826569 | 1.397507389 | 0.162261046 |    | 0.232455993 |
| Skp1a     | 2716.556643 | 0.811652228 | 0.123475279 | 6.573398629 | 4.92E-11    |    | 3.33E-10    |
| Mrpl54    | 508.8816762 | 0.811586843 | 0.199461793 | 4.068883714 | 4.72E-05    |    | 0.000150304 |
| Ebf2      | 0.316207158 | 0.811423825 | 3.42563792  | 0.236867948 | 0.812759236 | NA |             |
| Tecr      | 3134.813086 | 0.811096937 | 0.183081519 | 4.430250211 | 9.41E-06    |    | 3.34E-05    |
| Cwf1911   | 254.6691203 | 0.810895617 | 0.14657014  | 5.532474881 | 3.16E-08    |    | 1.54E-07    |
| Olf1271   | 5.525735476 | 0.810751935 | 0.883128911 | 0.918044834 | 0.358595394 |    | 0.450984383 |
| Adap2     | 470.3727949 | 0.810730082 | 0.201505005 | 4.023374413 | 5.74E-05    |    | 0.000179953 |
| Retreg3   | 1157.503436 | 0.810301136 | 0.132284633 | 6.125436629 | 9.04E-10    |    | 5.30E-09    |
| Slc38a6   | 632.0395356 | 0.809961214 | 0.156261883 | 5.183357556 | 2.18E-07    |    | 9.62E-07    |
| Akt2      | 1428.78884  | 0.809941217 | 0.169995171 | 4.764495447 | 1.89E-06    |    | 7.34E-06    |
| Gm12411   | 0.764757101 | 0.809846036 | 2.168480019 | 0.373462531 | 0.708804227 | NA |             |
| Ybey      | 86.64129661 | 0.809837737 | 0.268491268 | 3.016253533 | 0.002559192 |    | 0.00591581  |
| Ppib      | 4974.739309 | 0.809699161 | 0.198026319 | 4.088846192 | 4.34E-05    |    | 0.000138767 |
| Rad23a    | 688.5466035 | 0.809363322 | 0.169705842 | 4.769213087 | 1.85E-06    |    | 7.19E-06    |
| Cpa6      | 26.81595263 | 0.809283994 | 0.580812457 | 1.393365421 | 0.163509317 |    | 0.233988654 |
| Ypel5     | 757.707454  | 0.80901289  | 0.157703977 | 5.129946029 | 2.90E-07    |    | 1.26E-06    |
| Alkbh7    | 170.7148854 | 0.808871098 | 0.243616539 | 3.320263481 | 0.000899325 |    | 0.002290364 |
| B3galnt2  | 445.9995949 | 0.808524991 | 0.167568809 | 4.825032747 | 1.40E-06    |    | 5.54E-06    |
| Dpp7      | 461.3800721 | 0.808249375 | 0.191527019 | 4.220027946 | 2.44E-05    |    | 8.13E-05    |
| Ttc38     | 1014.764383 | 0.808217311 | 0.239583871 | 3.373421211 | 0.000742403 |    | 0.00191794  |
| Wwp1      | 1169.148077 | 0.808087896 | 0.137447425 | 5.879250905 | 4.12E-09    |    | 2.23E-08    |
| Npffr1    | 75.3786816  | 0.808017036 | 0.411674396 | 1.962757568 | 0.04967435  |    | 0.083896208 |
| Gm42927   | 270.2228798 | 0.807705265 | 0.188263069 | 4.290301179 | 1.78E-05    |    | 6.05E-05    |
| Fbxo43    | 2.894661561 | 0.806473951 | 1.227194028 | 0.657169065 | 0.511072215 |    | 0.600300339 |
| Kin       | 238.1115326 | 0.806347373 | 0.187951595 | 4.290186391 | 1.79E-05    |    | 6.06E-05    |
| Ciao2b    | 223.5748201 | 0.806201818 | 0.193135456 | 4.174281791 | 2.99E-05    |    | 9.81E-05    |
| Gm14239   | 0.765503199 | 0.806025745 | 2.168353661 | 0.371722454 | 0.710099505 | NA |             |
| Prrg2     | 445.7189039 | 0.805989923 | 0.148312346 | 5.434408846 | 5.50E-08    |    | 2.60E-07    |
| Dars2     | 275.3493882 | 0.805949837 | 0.226573185 | 3.557128077 | 0.000374931 |    | 0.001025153 |
| Adam21    | 1.348653044 | 0.805890979 | 2.128954206 | 0.378538428 | 0.705030652 | NA |             |
| Sec61b    | 1043.334243 | 0.805884621 | 0.220925529 | 3.647765939 | 0.00026453  |    | 0.000743074 |
| Fau-ps2   | 0.918056673 | 0.805716337 | 1.926655421 | 0.418194311 | 0.675805055 | NA |             |
| Recql5    | 357.3375291 | 0.805647855 | 0.180707479 | 4.458298341 | 8.26E-06    |    | 2.95E-05    |
|           | 864.9248762 | 0.805627829 | 0.139293629 | 5.783666021 | 7.31E-09    |    | 3.85E-08    |
| Adck5     | 669.8132601 | 0.805065106 | 0.215890641 | 3.729041255 | 0.00019221  |    | 0.000553699 |
| Snf8      | 585.4567523 | 0.804766227 | 0.128865662 | 6.245001306 | 4.24E-10    |    | 2.57E-09    |
| Rap2c     | 613.8488042 | 0.804692541 | 0.234287005 | 3.434644357 | 0.000593332 |    | 0.001564149 |
| Golt1a    | 181.3621131 | 0.804248657 | 0.296993036 | 2.707971437 | 0.006769585 |    | 0.014281902 |
| Hsf4      | 150.1777561 | 0.804072065 | 0.229485972 | 3.503796148 | 0.000458676 |    | 0.001233556 |
| Rabggtb   | 752.4114877 | 0.803508848 | 0.157886854 | 5.089143432 | 3.60E-07    |    | 1.54E-06    |
| Lysmd3    | 290.7681907 | 0.803340159 | 0.232342637 | 3.457566678 | 0.000545077 |    | 0.00144675  |

2-Mar



|            |             |             |             |             |                |             |
|------------|-------------|-------------|-------------|-------------|----------------|-------------|
| Dlx6       | 4.128119175 | 0.803290538 | 0.874668018 | 0.918394776 | 0.358412225    | 0.450838309 |
| Man1a      | 2995.332404 | 0.802900112 | 0.139843014 | 5.741438818 | 9.39E-09       | 4.89E-08    |
| Rer1       | 1777.353084 | 0.802697936 | 0.13754982  | 5.835688732 | 5.36E-09       | 2.86E-08    |
| Rsph10b    | 5.567224452 | 0.802287247 | 1.017650961 | 0.788371728 | 0.430479303    | 0.522134833 |
| Sirt1      | 219.7235414 | 0.80223061  | 0.205754831 | 3.898963668 | 9.66E-05       | 0.000292995 |
| Tm2d2      | 717.9059304 | 0.802186205 | 0.140337867 | 5.716106593 | 1.09E-08       | 5.62E-08    |
| Gm8319     | 0.860520946 | 0.80216506  | 3.17655926  | 0.252526395 | 0.800634214 NA |             |
| Mfsd1      | 952.3562027 | 0.802164361 | 0.150381677 | 5.334189501 | 9.60E-08       | 4.42E-07    |
| Lyrm9      | 156.8464613 | 0.801634645 | 0.335136066 | 2.391967703 | 0.016758317    | 0.032112979 |
| Pex2       | 711.9329758 | 0.801470259 | 0.148675144 | 5.390748153 | 7.02E-08       | 3.28E-07    |
| Mrpl24     | 1174.638546 | 0.801437924 | 0.123503657 | 6.489183748 | 8.63E-11       | 5.69E-10    |
| Atraid     | 978.5764546 | 0.801210373 | 0.187164659 | 4.280778091 | 1.86E-05       | 6.30E-05    |
| Kat2b      | 1321.918501 | 0.801080449 | 0.181392506 | 4.416281934 | 1.00E-05       | 3.55E-05    |
| Dusp26     | 0.89224852  | 0.800985079 | 2.288658121 | 0.349980223 | 0.72635354 NA  |             |
| Tmem170b   | 319.6196486 | 0.800926457 | 0.207180343 | 3.865841928 | 0.000110707    | 0.000332217 |
| Zfp85      | 48.69218548 | 0.800791557 | 0.357652708 | 2.239019975 | 0.025154616    | 0.046061858 |
| Scn2a      | 4.188633753 | 0.800561038 | 1.746893944 | 0.458276841 | 0.64675356     | 0.722846186 |
| Zic5       | 1.959625572 | 0.800260588 | 1.414571559 | 0.565726479 | 0.571579732    | 0.655739655 |
| Polr2k-ps  | 0.239531521 | 0.79997552  | 3.64157064  | 0.219678704 | 0.826121391 NA |             |
| Yae1d1     | 366.4601577 | 0.799857059 | 0.206039294 | 3.882060767 | 0.000103575    | 0.000312356 |
| Myo1b      | 1891.538087 | 0.799474297 | 0.250925948 | 3.186096554 | 0.001442065    | 0.003520595 |
| Tmem33     | 1010.240688 | 0.799338215 | 0.158119365 | 5.055283487 | 4.30E-07       | 1.82E-06    |
| Fech       | 2249.122986 | 0.799011995 | 0.170168124 | 4.69542695  | 2.66E-06       | 1.01E-05    |
| Gm10478    | 10.11690228 | 0.798988664 | 0.864696053 | 0.924011    | 0.355480589    | 0.447811503 |
| Ctsl       | 9843.324609 | 0.798864278 | 0.263454711 | 3.032264161 | 0.002427267    | 0.00564299  |
| lyd        | 1308.153971 | 0.798863657 | 0.12789231  | 6.246377574 | 4.20E-10       | 2.55E-09    |
| Cfap54     | 13.27327766 | 0.798630329 | 0.663357208 | 1.20392199  | 0.228619732    | 0.310657515 |
| Romo1      | 877.1932592 | 0.798411271 | 0.159479877 | 5.00634491  | 5.55E-07       | 2.31E-06    |
| Rab3a      | 74.209792   | 0.797856593 | 0.266028527 | 2.999139235 | 0.002707435    | 0.006227248 |
| Elof1      | 497.3735777 | 0.797827992 | 0.165178713 | 4.830089645 | 1.36E-06       | 5.41E-06    |
| CR550303.1 | 1.870800444 | 0.797792119 | 1.339347718 | 0.595657205 | 0.551404252    | 0.636922535 |
| Cul3       | 1180.02158  | 0.7977577   | 0.119283748 | 6.68789935  | 2.26E-11       | 1.59E-10    |
| Tm4sf20    | 0.978796744 | 0.797682464 | 1.90397618  | 0.418956115 | 0.675248205 NA |             |
| Mtln       | 201.7965915 | 0.797096574 | 0.193265844 | 4.124353061 | 3.72E-05       | 0.000120244 |
| Ppfia1     | 643.0867888 | 0.796384082 | 0.236498645 | 3.367393847 | 0.000758822    | 0.001957984 |
| Gm10600    | 77.44848731 | 0.796241918 | 0.425993664 | 1.869140282 | 0.0616033      | 0.101127882 |
| Hsf2       | 532.4655481 | 0.796167334 | 0.159292903 | 4.998134356 | 5.79E-07       | 2.41E-06    |
| Psmc4      | 1733.742769 | 0.795980135 | 0.116627607 | 6.824971868 | 8.79E-12       | 6.49E-11    |
| Olfr1310   | 17.32393995 | 0.795528666 | 0.542589447 | 1.466170546 | 0.142601831    | 0.208497085 |
| Zkscan14   | 94.16161974 | 0.795197829 | 0.294846942 | 2.69698517  | 0.006997039    | 0.014730244 |
| Prdx3      | 1721.635321 | 0.795020806 | 0.117853296 | 6.74585126  | 1.52E-11       | 1.09E-10    |
| Gm48836    | 10.77510537 | 0.794846372 | 0.833055866 | 0.954133335 | 0.340016154    | 0.43238814  |
| Bri3       | 758.4956884 | 0.794814112 | 0.202286794 | 3.929144829 | 8.52E-05       | 0.000261076 |
| Hspa4      | 2155.688095 | 0.794696565 | 0.13621359  | 5.834194404 | 5.41E-09       | 2.88E-08    |
| Taco1      | 161.5538265 | 0.793516653 | 0.23141241  | 3.429015116 | 0.000605776    | 0.001593468 |
| Mrpl37     | 600.5178107 | 0.793317193 | 0.203969998 | 3.889381769 | 0.0001005      | 0.000303619 |
| Elmod3     | 320.9485927 | 0.793213505 | 0.233146927 | 3.402204418 | 0.000668446    | 0.001741392 |
| Commd6     | 418.0755231 | 0.793094296 | 0.198271381 | 4.000044234 | 6.33E-05       | 0.000197523 |
| Ccdc51     | 171.6850009 | 0.793065391 | 0.205959562 | 3.850587874 | 0.000117835    | 0.000351504 |
| Ptcd2      | 313.5523255 | 0.792981626 | 0.192406485 | 4.121387214 | 3.77E-05       | 0.000121671 |
| Hlcs       | 214.0015622 | 0.792968763 | 0.209793844 | 3.779752297 | 0.000156984    | 0.000459209 |
| Zfp738     | 179.4734907 | 0.79292456  | 0.304143687 | 2.607072224 | 0.00913201     | 0.018702847 |
| Krtcap2    | 821.8312546 | 0.792623313 | 0.292000927 | 2.714454782 | 0.006638496    | 0.014046554 |
| Paf1       | 712.9508484 | 0.792159131 | 0.167140308 | 4.739485898 | 2.14E-06       | 8.25E-06    |
| Tmc5       | 16.65869959 | 0.791753554 | 0.763171299 | 1.037451953 | 0.299525277    | 0.389140902 |
| Gpr137     | 418.4963218 | 0.789908362 | 0.254427899 | 3.104645225 | 0.001905074    | 0.004523986 |
| Ppp1r1a    | 0.911489663 | 0.789829956 | 1.963946696 | 0.402164661 | 0.687562848 NA |             |
| Vdr38      | 10.06189799 | 0.789556968 | 0.587499789 | 1.343927236 | 0.178971918    | 0.252805804 |
| Net1       | 1462.98381  | 0.789290881 | 0.169109895 | 4.667325231 | 3.05E-06       | 1.15E-05    |
| Bsc12      | 692.3526016 | 0.788840718 | 0.119406926 | 6.606322984 | 3.94E-11       | 2.69E-10    |
| Mrpl30     | 904.045196  | 0.788765183 | 0.176955572 | 4.457419297 | 8.30E-06       | 2.96E-05    |
| Gdf2       | 123.6000441 | 0.78835013  | 0.46313279  | 1.702211864 | 0.08871566     | 0.139471096 |
| Olfr161    | 17.30967772 | 0.788253637 | 0.448481342 | 1.757606309 | 0.078814519    | 0.125596366 |
| Gm47147    | 11.76098048 | 0.7882467   | 0.588090233 | 1.340349925 | 0.180131608    | 0.254064999 |
| Eea1       | 667.9464695 | 0.788206325 | 0.149550208 | 5.270513065 | 1.36E-07       | 6.15E-07    |
| Gstm4      | 1153.892645 | 0.788067832 | 0.376203932 | 2.094788926 | 0.03618976     | 0.063467033 |

|               |             |             |             |             |             |             |
|---------------|-------------|-------------|-------------|-------------|-------------|-------------|
| Ugt2b35       | 4380.945178 | 0.788033398 | 0.186745949 | 4.219815222 | 2.45E-05    | 8.14E-05    |
| Trub1         | 402.8921813 | 0.787754389 | 0.150863559 | 5.221634645 | 1.77E-07    | 7.94E-07    |
| Sos1          | 562.4080421 | 0.787188866 | 0.175164661 | 4.493993612 | 6.99E-06    | 2.53E-05    |
| Gm14648       | 1.808662145 | 0.787043951 | 2.8572049   | 0.275459401 | 0.782963313 | 0.835925291 |
| Rbfa          | 554.3256268 | 0.786974777 | 0.143511651 | 5.483699538 | 4.17E-08    | 2.00E-07    |
| Mlip          | 3.669683552 | 0.786561166 | 0.947352261 | 0.830273171 | 0.406384353 | 0.499030502 |
| Olfr459       | 1.005670251 | 0.78598218  | 1.906195467 | 0.412330316 | 0.680097331 | NA          |
| Olfr959       | 3.126654701 | 0.785606381 | 1.253334453 | 0.626813042 | 0.530781793 | 0.618465451 |
| Herc4         | 884.9254463 | 0.785277897 | 0.140281742 | 5.597862459 | 2.17E-08    | 1.08E-07    |
| 9430025C20Rik | 0.896562526 | 0.784576474 | 2.211989235 | 0.354692718 | 0.722819807 | NA          |
| Ncoa4         | 2079.394468 | 0.784312132 | 0.15167402  | 5.171038074 | 2.33E-07    | 1.02E-06    |
| Grb14         | 1368.207356 | 0.784217464 | 0.137305655 | 5.71147242  | 1.12E-08    | 5.76E-08    |
| R3hdm2        | 1454.622554 | 0.784171814 | 0.156965246 | 4.995830828 | 5.86E-07    | 2.44E-06    |
| Cuta          | 606.4186473 | 0.783332596 | 0.14133982  | 5.542193229 | 2.99E-08    | 1.46E-07    |
| Rangrf        | 34.70077514 | 0.78285541  | 0.35203817  | 2.22377991  | 0.026163256 | 0.047693668 |
| Pno1          | 502.2855169 | 0.782825731 | 0.157016328 | 4.985632661 | 6.18E-07    | 2.56E-06    |
| Hspd1         | 5910.220365 | 0.782520379 | 0.193595723 | 4.042033404 | 5.30E-05    | 0.000167105 |
| Pdf           | 182.9195105 | 0.782413442 | 0.240988111 | 3.246688976 | 0.001167559 | 0.002908746 |
| Iscs1         | 812.5062786 | 0.782241886 | 0.210729552 | 3.712065441 | 0.000205575 | 0.000589213 |
| Ccdc130       | 120.4269993 | 0.781669552 | 0.286000793 | 2.733102739 | 0.006274076 | 0.013341704 |
| St7l          | 353.819752  | 0.78149925  | 0.268584787 | 2.909692905 | 0.00361784  | 0.008110052 |
| Preld1        | 2811.283374 | 0.78139521  | 0.172980453 | 4.517245723 | 6.26E-06    | 2.28E-05    |
| Ovol3         | 6.276931864 | 0.781112949 | 0.911839699 | 0.856634066 | 0.391647153 | 0.484247219 |
| Gm10447       | 40.3611478  | 0.781105382 | 0.479730284 | 1.628217789 | 0.103478714 | 0.158914073 |
| Cyp11b1       | 0.768035586 | 0.781063202 | 2.427558112 | 0.321748509 | 0.747643226 | NA          |
| Olfr1218      | 0.743484882 | 0.780821636 | 2.099023869 | 0.371992738 | 0.709898256 | NA          |
| Fnip2         | 404.7819672 | 0.780587814 | 0.230300203 | 3.389436074 | 0.000700365 | 0.001817049 |
| Secisbp2      | 352.1990738 | 0.780568046 | 0.160157983 | 4.873737999 | 1.10E-06    | 4.40E-06    |
| Spg20         | 581.3919423 | 0.780414892 | 0.207848957 | 3.754721232 | 0.000173535 | 0.000504505 |
| Selenot       | 2033.078743 | 0.780125162 | 0.198494349 | 3.930213458 | 8.49E-05    | 0.000260021 |
| Ttc19         | 198.4851737 | 0.779812341 | 0.212799909 | 3.664533253 | 0.00024779  | 0.000699507 |
| Rgs9          | 10.48666926 | 0.779802785 | 0.564575402 | 1.381219909 | 0.167211355 | 0.238427374 |
| Slc9a3r1      | 3885.308435 | 0.779610222 | 0.129101364 | 6.038745033 | 1.55E-09    | 8.82E-09    |
| Ubr4          | 2514.586388 | 0.779577914 | 0.155526603 | 5.012505254 | 5.37E-07    | 2.24E-06    |
| Gja8          | 3.62346393  | 0.779484062 | 0.879201866 | 0.886581446 | 0.375304287 | 0.467396266 |
| Pcsk7         | 494.3370801 | 0.779287891 | 0.220955031 | 3.5269072   | 0.000420444 | 0.001138639 |
| Rab4a         | 363.559451  | 0.77920951  | 0.280595542 | 2.776984637 | 0.005486577 | 0.011833903 |
| Olfr446       | 103.4212494 | 0.779015719 | 0.310948714 | 2.505286831 | 0.012235213 | 0.024293723 |
| Ints13        | 395.9229814 | 0.778989878 | 0.166680365 | 4.673555135 | 2.96E-06    | 1.12E-05    |
| Ddx4          | 2.27722214  | 0.778978878 | 1.270347698 | 0.613201314 | 0.539743236 | 0.626893492 |
| Ppp1r14a      | 60.81405166 | 0.778771952 | 0.404436386 | 1.925573411 | 0.054157661 | 0.090375863 |
| Krcc1         | 843.5697591 | 0.778341792 | 0.153619122 | 5.066698607 | 4.05E-07    | 1.72E-06    |
| Cdkal1        | 162.7067236 | 0.777874144 | 0.231161218 | 3.36507201  | 0.000765237 | 0.00197364  |
| H4c8          | 55.48454655 | 0.777640077 | 0.671502806 | 1.158059312 | 0.246839833 | 0.330827474 |
| Rft1          | 294.6998891 | 0.777215033 | 0.184269199 | 4.217823918 | 2.47E-05    | 8.20E-05    |
| Esd           | 3761.203727 | 0.776963547 | 0.215868727 | 3.599240887 | 0.000319147 | 0.000881962 |
| Ap1g1         | 1438.410555 | 0.776715435 | 0.136515162 | 5.68959098  | 1.27E-08    | 6.51E-08    |
| Ube4a         | 1252.482864 | 0.776381679 | 0.187933686 | 4.131146975 | 3.61E-05    | 0.0001171   |
| Guk1          | 490.1143892 | 0.775912819 | 0.206093337 | 3.764861255 | 0.000166642 | 0.000485874 |
| Ccdc84        | 393.7163529 | 0.775448739 | 0.261125811 | 2.969636493 | 0.002981523 | 0.00680533  |
| Tor1a         | 738.3001013 | 0.775392199 | 0.190486042 | 4.070598521 | 4.69E-05    | 0.00014923  |
| Fam107b       | 978.7161921 | 0.775169104 | 0.211514165 | 3.664856696 | 0.000247477 | 0.000698855 |
| Trpt1         | 68.63147068 | 0.774536915 | 0.26061726  | 2.971932538 | 0.002959317 | 0.006762278 |
| Phkb          | 380.6455976 | 0.774459626 | 0.216186305 | 3.58237136  | 0.000340489 | 0.000935934 |
| Cntn3         | 5.060403493 | 0.774457679 | 0.773898217 | 1.000722913 | 0.316960787 | 0.408400536 |
| Sgtb          | 22.57168983 | 0.774315282 | 0.431009275 | 1.79651652  | 0.072412408 | 0.116559978 |
| Psmd9         | 515.6419273 | 0.774272678 | 0.20660039  | 3.747682563 | 0.000178476 | 0.000516756 |
| Olfr229       | 0.573445376 | 0.77397397  | 3.530594419 | 0.219219168 | 0.826479325 | NA          |
| Ppp1r11       | 495.1674551 | 0.773932943 | 0.205565385 | 3.764899144 | 0.000166616 | 0.000485874 |
| Bud31         | 779.4693668 | 0.773922065 | 0.149789632 | 5.166726539 | 2.38E-07    | 1.04E-06    |
| Vps13c        | 385.2699471 | 0.773889791 | 0.23955748  | 3.230497293 | 0.001235751 | 0.003062521 |
| Mkks          | 227.2082225 | 0.773748331 | 0.234714045 | 3.296557432 | 0.000978776 | 0.002472758 |
| 2210418O10Rik | 191.6019732 | 0.773221205 | 0.240075074 | 3.22074754  | 0.001278567 | 0.003159903 |
| Slc28a2b      | 1.262442709 | 0.77283319  | 1.787558614 | 0.432340056 | 0.665494279 | NA          |
| Hhat          | 69.16758096 | 0.772762217 | 0.272129931 | 2.839681083 | 0.004515866 | 0.00991991  |
| Tmbim6        | 19017.81015 | 0.772729241 | 0.16008171  | 4.827092607 | 1.39E-06    | 5.49E-06    |

|          |             |             |             |             |                |             |
|----------|-------------|-------------|-------------|-------------|----------------|-------------|
| Pnkp     | 399.3193057 | 0.772471179 | 0.238693591 | 3.236245997 | 0.00121113     | 0.003006748 |
| Prrt3    | 0.567111621 | 0.772060961 | 2.999912985 | 0.257361118 | 0.796900015 NA |             |
| Khdc4    | 1335.376712 | 0.771705886 | 0.139012466 | 5.551343055 | 2.83E-08       | 1.39E-07    |
| Nek1     | 242.2801782 | 0.771668473 | 0.191073287 | 4.038599459 | 5.38E-05       | 0.000169507 |
| Dctn3    | 416.9416707 | 0.771639637 | 0.156065186 | 4.9443419   | 7.64E-07       | 3.14E-06    |
| Gm7143   | 3.242945236 | 0.771560209 | 1.003115665 | 0.769163753 | 0.441796105    | 0.532956411 |
| Wrap53   | 133.286888  | 0.771316376 | 0.237081857 | 3.253375792 | 0.001140426    | 0.00284557  |
| Tm2d1    | 212.3507317 | 0.770786975 | 0.168834997 | 4.56532704  | 4.99E-06       | 1.84E-05    |
| Uchl5    | 342.6325689 | 0.770765993 | 0.162134917 | 4.753855663 | 2.00E-06       | 7.72E-06    |
| Naa10    | 566.8701289 | 0.770715515 | 0.161409633 | 4.774904091 | 1.80E-06       | 7.00E-06    |
| Aarsd1   | 432.4811115 | 0.770485102 | 0.158670865 | 4.855870066 | 1.20E-06       | 4.79E-06    |
| BC003965 | 516.2452684 | 0.770155491 | 0.127777885 | 6.027298779 | 1.67E-09       | 9.43E-09    |
| Ackr1    | 12.53404246 | 0.770043178 | 0.663951248 | 1.159788735 | 0.246134832    | 0.330038273 |
| Ceacam2  | 2.964580321 | 0.769762188 | 1.534798321 | 0.501539633 | 0.615991392    | 0.69624221  |
| Kpna6    | 762.9302647 | 0.769623283 | 0.160743438 | 4.787898603 | 1.69E-06       | 6.59E-06    |
| Vmn1r214 | 2.855872512 | 0.769561923 | 1.166339749 | 0.659809394 | 0.509376154    | 0.598803246 |
| C1d      | 615.5715583 | 0.769312489 | 0.133786805 | 5.75028671  | 8.91E-09       | 4.65E-08    |
| Srsf11   | 2116.547353 | 0.769202396 | 0.169158595 | 4.547226203 | 5.44E-06       | 1.99E-05    |
| Rdgrip1  | 46.65949717 | 0.768665802 | 0.490717543 | 1.566411907 | 0.117252217    | 0.176895203 |
| Ndufa7   | 1612.337152 | 0.768496076 | 0.112928372 | 6.805163869 | 1.01E-11       | 7.40E-11    |
| Stx17    | 464.0249085 | 0.768488457 | 0.231092239 | 3.325461994 | 0.000882721    | 0.002253802 |
| Klc4     | 1103.817232 | 0.768478817 | 0.231239692 | 3.323299775 | 0.000889593    | 0.002268967 |
| Ghitm    | 3674.232745 | 0.768327733 | 0.161857512 | 4.746938981 | 2.07E-06       | 7.97E-06    |
| Usp45    | 270.7577608 | 0.768227103 | 0.186217265 | 4.125434349 | 3.70E-05       | 0.000119768 |
| Trmt5    | 127.8272694 | 0.768070736 | 0.282551002 | 2.718343702 | 0.006560965    | 0.013898027 |
| Mbd1     | 1205.853083 | 0.768040602 | 0.265663174 | 2.891031493 | 0.003839796    | 0.008559211 |
| Cyb5r3   | 7482.470324 | 0.767656357 | 0.165151455 | 4.64819615  | 3.35E-06       | 1.26E-05    |
| Gpr182   | 189.7181786 | 0.767457588 | 0.348907795 | 2.199600007 | 0.027835287    | 0.050370021 |
| Snrpa1   | 362.0845585 | 0.767300044 | 0.221624481 | 3.462164626 | 0.000535849    | 0.001424697 |
| Srp9     | 1355.847867 | 0.767285306 | 0.135779788 | 5.650953793 | 1.60E-08       | 8.06E-08    |
| Tommm70a | 1511.417449 | 0.766886944 | 0.142294671 | 5.389428435 | 7.07E-08       | 3.30E-07    |
| Miga2    | 724.8115384 | 0.766466454 | 0.410671748 | 1.866372495 | 0.061989269    | 0.101663593 |
| Sharpin  | 724.9034161 | 0.766146104 | 0.195217225 | 3.924582486 | 8.69E-05       | 0.000265632 |
| Raph1    | 1328.402087 | 0.766036822 | 0.292442205 | 2.619446881 | 0.008807249    | 0.01810733  |
| Adam28   | 4.632394302 | 0.765981922 | 0.835124729 | 0.91720661  | 0.359034384    | 0.451354485 |
| Ccn1     | 982.6788363 | 0.765443621 | 0.16372473  | 4.675186344 | 2.94E-06       | 1.11E-05    |
| Cfap100  | 8.013920737 | 0.76500176  | 1.273494836 | 0.600710532 | 0.548032803    | 0.633921832 |
| Lingo1   | 15.41077354 | 0.764623017 | 1.077553247 | 0.709591864 | 0.477957266    | 0.568215863 |
| Selenoi  | 848.3851125 | 0.764577711 | 0.171042335 | 4.470108014 | 7.82E-06       | 2.80E-05    |
| Olfr1238 | 31.50971337 | 0.764570038 | 0.358849184 | 2.130616628 | 0.033120739    | 0.058761822 |
| Tsc2     | 800.7165393 | 0.764540704 | 0.198291421 | 3.855641868 | 0.000115426    | 0.000345221 |
| Tfap2b   | 1.069987363 | 0.764505764 | 1.629741284 | 0.469096397 | 0.639000734 NA |             |
| Mrm2     | 90.48391747 | 0.764023755 | 0.240514415 | 3.176623556 | 0.001490003    | 0.003621037 |
| Ighd     | 27.15466643 | 0.763677824 | 0.619172646 | 1.233384304 | 0.217432418    | 0.297757881 |
| Zfp296   | 16.31086341 | 0.763668902 | 0.460699821 | 1.657627954 | 0.097392584    | 0.150980433 |
| Ssu72    | 671.7599771 | 0.76336042  | 0.18122357  | 4.212257931 | 2.53E-05       | 8.39E-05    |
| Cam1     | 338.4415939 | 0.763336603 | 0.142611638 | 5.352554784 | 8.67E-08       | 4.01E-07    |
| Zfp110   | 512.3731902 | 0.763183577 | 0.154266925 | 4.947162703 | 7.53E-07       | 3.09E-06    |
| Mrps33   | 588.5446602 | 0.763142802 | 0.250003528 | 3.052528136 | 0.002269225    | 0.005307414 |
| Gm20518  | 5.127063984 | 0.763050018 | 1.227887752 | 0.62143304  | 0.534314739    | 0.621562447 |
| Dnajc21  | 399.9523485 | 0.762783993 | 0.243730265 | 3.12962362  | 0.001750304    | 0.004190897 |
| Olfr675  | 4.44166692  | 0.762295467 | 0.844784612 | 0.902354821 | 0.366868413    | 0.459272485 |
| Vmn1r43  | 19.18928385 | 0.761862041 | 0.69576068  | 1.095005887 | 0.273514057    | 0.360233904 |
| Fanci    | 112.2175619 | 0.761798493 | 0.223584351 | 3.407208467 | 0.00065631     | 0.001712916 |
| Cyp3a13  | 2140.448007 | 0.761663841 | 0.279246438 | 2.727568694 | 0.006380297    | 0.013542717 |
| Tmc7     | 127.2359358 | 0.76160661  | 0.374099156 | 2.035841562 | 0.041766267    | 0.072053362 |
| Ttc37    | 274.5455283 | 0.761402481 | 0.213449773 | 3.567127147 | 0.000360916    | 0.000989531 |
| Abraxas1 | 154.8976453 | 0.761277768 | 0.290491261 | 2.620656354 | 0.008776068    | 0.018059583 |
| Gmppb    | 239.0474808 | 0.761220502 | 0.383015727 | 1.987439283 | 0.046873738    | 0.079864674 |
| Narf     | 544.7799605 | 0.760972468 | 0.221530338 | 3.435071132 | 0.000592398    | 0.001562136 |
| Naa60    | 326.6562601 | 0.760376671 | 0.36326456  | 2.093176031 | 0.036333444    | 0.063705908 |
| Tmcc1    | 645.7476989 | 0.76032521  | 0.144898783 | 5.247284986 | 1.54E-07       | 6.94E-07    |
| Zfp458   | 37.01634634 | 0.759676413 | 0.371879511 | 2.042802548 | 0.041071988    | 0.071049747 |
| Acaca    | 1240.32888  | 0.759396392 | 0.154023974 | 4.930377854 | 8.21E-07       | 3.36E-06    |
| Dcaf1    | 524.0300556 | 0.759366846 | 0.268994872 | 2.822978897 | 0.00475797     | 0.01038723  |
| Nif311   | 290.084902  | 0.759281567 | 0.276328249 | 2.747752246 | 0.006000533    | 0.012817578 |



|               |             |             |             |             |                |             |
|---------------|-------------|-------------|-------------|-------------|----------------|-------------|
| Cfcc1         | 705.3240657 | 0.759042981 | 0.193871908 | 3.915177764 | 9.03E-05       | 0.000275115 |
| Poldip2       | 1437.592471 | 0.757968893 | 0.122263416 | 6.199474213 | 5.67E-10       | 3.39E-09    |
| Stradb        | 637.2010718 | 0.757890646 | 0.14382553  | 5.269514004 | 1.37E-07       | 6.18E-07    |
| Rccd1         | 100.5122628 | 0.756701455 | 0.237532747 | 3.185672145 | 0.001444182    | 0.003525259 |
| Ndst4         | 12.48844858 | 0.756669301 | 0.528303036 | 1.432263776 | 0.152068346    | 0.220409893 |
| Lrig3         | 213.091816  | 0.7564899   | 0.208585642 | 3.626759229 | 0.000287001    | 0.000800129 |
| Ints6         | 474.8401333 | 0.756068872 | 0.366101496 | 2.065189243 | 0.038905098    | 0.067734284 |
| Sphk2         | 1199.649891 | 0.756012136 | 0.138177003 | 5.471331098 | 4.47E-08       | 2.13E-07    |
| Gm18147       | 3.499390503 | 0.755593656 | 0.919967179 | 0.821326753 | 0.411460173    | 0.503678419 |
| Nol8          | 239.6405923 | 0.755489134 | 0.22169126  | 3.407843559 | 0.000654784    | 0.00170972  |
| Izumo1r       | 2.597412706 | 0.75543297  | 1.278244547 | 0.590992523 | 0.554525431    | 0.63974755  |
| Pgghg         | 526.225419  | 0.755120715 | 0.198396694 | 3.806115408 | 0.000141167    | 0.000416368 |
| Ecpas         | 1126.926062 | 0.755026112 | 0.204374879 | 3.694319556 | 0.000220476    | 0.000628963 |
| 4930469K13Rik | 0.942677795 | 0.755000037 | 2.006852725 | 0.376210983 | 0.706760051 NA |             |
| Unkl          | 415.838916  | 0.754772197 | 0.171069689 | 4.412074411 | 1.02E-05       | 3.61E-05    |
| 1700109H08Rik | 34.4228149  | 0.754602103 | 0.336222387 | 2.244354134 | 0.024809625    | 0.045503441 |
| Pth1r         | 113.63919   | 0.754520497 | 0.267388432 | 2.82181428  | 0.004775282    | 0.010418353 |
| Map2k2        | 1973.204345 | 0.754515072 | 0.130952057 | 5.761765688 | 8.32E-09       | 4.35E-08    |
| Reps2         | 342.5730415 | 0.754250286 | 0.287009006 | 2.62796731  | 0.008589677    | 0.017722475 |
| Lonp1         | 2392.031304 | 0.753970197 | 0.104723024 | 7.199660302 | 6.04E-13       | 5.06E-12    |
| Slc25a32      | 326.0468827 | 0.753950058 | 0.253384494 | 2.975517748 | 0.002924944    | 0.006689623 |
| Zfp715        | 295.4296748 | 0.753027609 | 0.188894182 | 3.986505033 | 6.71E-05       | 0.00020841  |
| Serpind1      | 7273.354369 | 0.752871135 | 0.240630645 | 3.128741703 | 0.001755566    | 0.004202314 |
| Spink4        | 3.484476198 | 0.7525474   | 1.374869274 | 0.547359239 | 0.584131953    | 0.667266251 |
| Cox7a1        | 14.92110079 | 0.752446396 | 0.474926545 | 1.584342682 | 0.113115758    | 0.171626686 |
| 2300009A05Rik | 219.4773939 | 0.751961247 | 0.177735562 | 4.230786662 | 2.33E-05       | 7.78E-05    |
| 3110082117Rik | 112.9098163 | 0.751797669 | 0.248790838 | 3.021806081 | 0.002512715    | 0.005818631 |
| Rps2-ps10     | 121.2421542 | 0.751740983 | 0.364991996 | 2.059609503 | 0.039435887    | 0.068567364 |
| Neurl2        | 46.09048793 | 0.751463427 | 0.347186938 | 2.164434617 | 0.030431009    | 0.054483076 |
| Olfr1423      | 4.330299921 | 0.750803424 | 0.934006632 | 0.803852348 | 0.421482253    | 0.513208303 |
| Slirp         | 452.4407269 | 0.750553278 | 0.192146919 | 3.906142676 | 9.38E-05       | 0.00028514  |
| Rspry1        | 304.4998658 | 0.750509303 | 0.177489997 | 4.228459727 | 2.35E-05       | 7.85E-05    |
| Rev1          | 346.0377726 | 0.750245163 | 0.173919637 | 4.31374614  | 1.61E-05       | 5.49E-05    |
| Topors        | 405.490652  | 0.749739784 | 0.172075383 | 4.357042654 | 1.32E-05       | 4.56E-05    |
| Smm4          | 160.2694806 | 0.749503989 | 0.242888332 | 3.085796601 | 0.002030076    | 0.004792127 |
| Setd1a        | 981.8651664 | 0.749500645 | 0.221657516 | 3.381345498 | 0.000721318    | 0.001867997 |
| Hexim1        | 867.2058791 | 0.749152823 | 0.287604278 | 2.604804172 | 0.009192678    | 0.018818057 |
| Cd300lg       | 125.3484976 | 0.748966796 | 0.303360174 | 2.468902846 | 0.013552801    | 0.02657253  |
| 0610009B22Rik | 333.4561638 | 0.748919133 | 0.242836973 | 3.084040806 | 0.002042096    | 0.004818498 |
| Bcap31        | 2225.095846 | 0.748860184 | 0.232841213 | 3.216183999 | 0.001299075    | 0.003208727 |
| 2210010C04Rik | 1.315902777 | 0.748825233 | 1.583040761 | 0.47302966  | 0.636192019 NA |             |
| Thtpa         | 479.3063717 | 0.748344227 | 0.164793584 | 4.541100505 | 5.60E-06       | 2.05E-05    |
| Ahcyl2        | 349.2163928 | 0.748053545 | 0.265887379 | 2.813422537 | 0.004901719    | 0.010673715 |
| 5730507C01Rik | 11.81794238 | 0.748047184 | 0.567715946 | 1.317643425 | 0.187623041    | 0.262939666 |
| Agbl3         | 91.85523629 | 0.747951109 | 0.395938144 | 1.889060502 | 0.058883722    | 0.097206323 |
| Gm15039       | 7.228066534 | 0.747830825 | 0.699191143 | 1.069565644 | 0.284814866    | 0.373031347 |
| Mindy1        | 1790.951096 | 0.747711066 | 0.163445628 | 4.574677694 | 4.77E-06       | 1.76E-05    |
| Ndufa4l2      | 46.88842771 | 0.74763518  | 0.375252972 | 1.992349791 | 0.046332692    | 0.079051215 |
| Tbx5          | 9.779160825 | 0.747626327 | 0.571703858 | 1.307716078 | 0.190969628    | 0.266812835 |
| Ublcp1        | 461.0956575 | 0.747603348 | 0.201430296 | 3.711474214 | 0.000206056    | 0.000590492 |
| Plod1         | 839.6008828 | 0.747542396 | 0.201747736 | 3.705332264 | 0.000211114    | 0.000604175 |
| Timmdc1       | 457.2514656 | 0.747407252 | 0.17036149  | 4.387184278 | 1.15E-05       | 4.01E-05    |
| Gm10040       | 15.1337831  | 0.747057782 | 0.571447956 | 1.307306771 | 0.191108545    | 0.266963166 |
| Stpg1         | 1.16097154  | 0.746931745 | 2.16891983  | 0.344379601 | 0.730560828 NA |             |
| Cux1          | 495.2411137 | 0.746364465 | 0.177555227 | 4.203562345 | 2.63E-05       | 8.69E-05    |
| Gstm7         | 966.5167524 | 0.746347032 | 0.339685069 | 2.197173498 | 0.028008058    | 0.050661153 |
| Slc9a6        | 228.5267415 | 0.746107534 | 0.285293785 | 2.615225328 | 0.008916861    | 0.0183084   |
| Stard4        | 1751.307022 | 0.745962292 | 0.208901685 | 3.570877333 | 0.000355788    | 0.00097594  |
| Pcsk9         | 821.2685816 | 0.745188363 | 0.192574946 | 3.869601827 | 0.000109013    | 0.000327424 |
| Nlrp10        | 3.328428208 | 0.745011612 | 1.077174611 | 0.691634954 | 0.489166605    | 0.578998284 |
| Avpi1         | 543.7197233 | 0.744816396 | 0.156186682 | 4.768757393 | 1.85E-06       | 7.20E-06    |
| Arid5b        | 1490.987731 | 0.744518422 | 0.271711846 | 2.740102919 | 0.006141995    | 0.013083685 |
| Gm9830        | 56.07098958 | 0.744460414 | 0.381998548 | 1.94885666  | 0.051312545    | 0.086346488 |
| Edar          | 0.574198898 | 0.744319161 | 2.946938585 | 0.252573693 | 0.800597661 NA |             |
| Trmo          | 62.47116743 | 0.743897568 | 0.242376576 | 3.069180947 | 0.002146465    | 0.005047999 |
| Zfp965        | 35.16991097 | 0.743612479 | 0.362226295 | 2.052894804 | 0.040082781    | 0.069550255 |

|               |             |             |             |             |                |             |
|---------------|-------------|-------------|-------------|-------------|----------------|-------------|
| Slc38a2       | 2611.644175 | 0.743461607 | 0.244702015 | 3.038232473 | 0.002379703    | 0.00554148  |
| Phb           | 2110.803669 | 0.742756871 | 0.150073481 | 4.949287954 | 7.45E-07       | 3.06E-06    |
| Mthfsd        | 289.1157306 | 0.74272502  | 0.231929843 | 3.202369345 | 0.001363021    | 0.00334824  |
| Rbis          | 536.7562003 | 0.742564441 | 0.184444279 | 4.025955399 | 5.67E-05       | 0.000178089 |
| Sbds          | 1023.246176 | 0.742353637 | 0.197449795 | 3.759708314 | 0.000170112    | 0.000495145 |
| Cinp          | 347.5197404 | 0.74230176  | 0.180090041 | 4.121836802 | 3.76E-05       | 0.000121473 |
| Rps6kb2       | 406.9100116 | 0.741626281 | 0.225946207 | 3.282313488 | 0.001029591    | 0.002589623 |
| Tbck          | 224.0965837 | 0.741542075 | 0.219763631 | 3.374271129 | 0.000740114    | 0.001913187 |
| Eif2s3y       | 1072.896421 | 0.741407949 | 0.148132785 | 5.005022675 | 5.59E-07       | 2.33E-06    |
| Plaa          | 759.5764656 | 0.741245138 | 0.146284097 | 5.06716147  | 4.04E-07       | 1.71E-06    |
| Gm20715       | 2.169788145 | 0.741215892 | 1.179233617 | 0.628557295 | 0.529638926    | 0.617555872 |
| Mfsd14b       | 533.1091133 | 0.741198791 | 0.149241293 | 4.96644578  | 6.82E-07       | 2.81E-06    |
| Ddx49         | 465.05953   | 0.741028706 | 0.197549608 | 3.751101881 | 0.000176059    | 0.000510799 |
| Zfp773        | 167.0225777 | 0.740738314 | 0.381052803 | 1.94392564  | 0.051904419    | 0.087204744 |
| Ces1g         | 3418.7723   | 0.740700432 | 0.340736409 | 2.173822379 | 0.029718477    | 0.053336204 |
| Myh8          | 5.203592381 | 0.740640288 | 0.939680725 | 0.788182909 | 0.430589724    | 0.522134833 |
| Mrpl45        | 495.8753211 | 0.740276229 | 0.165576087 | 4.470912685 | 7.79E-06       | 2.79E-05    |
| C330021F23Rik | 64.47115994 | 0.740267673 | 0.374248248 | 1.978012397 | 0.047927308    | 0.081407837 |
| Trmt10c       | 284.6743594 | 0.739932639 | 0.161604381 | 4.578666963 | 4.68E-06       | 1.73E-05    |
| Baiap211      | 706.3181683 | 0.739906681 | 0.214064244 | 3.456470202 | 0.0005473      | 0.001452197 |
| Wnt5b         | 67.93178388 | 0.739676255 | 0.357876476 | 2.066847934 | 0.038748485    | 0.067482294 |
| BC024063      | 20.7358807  | 0.739668685 | 0.561021449 | 1.318432098 | 0.187359042    | 0.262650846 |
| Hsp90b1       | 13891.86368 | 0.739661094 | 0.241555628 | 3.062073533 | 0.002198094    | 0.005158034 |
| Ephx3         | 6.635482727 | 0.739544958 | 0.739118129 | 1.000577483 | 0.31703112     | 0.408429422 |
| Gm14435       | 26.39324325 | 0.739502875 | 0.540471331 | 1.368255507 | 0.171232112    | 0.243304305 |
| Tpgs2         | 121.1897517 | 0.739315934 | 0.204224326 | 3.620116896 | 0.00029447     | 0.000819077 |
| Colq          | 1.480216064 | 0.739080017 | 1.796334813 | 0.411437785 | 0.680751552 NA |             |
| Smu1          | 907.3094003 | 0.738906993 | 0.121902369 | 6.061465417 | 1.35E-09       | 7.73E-09    |
| Smim8         | 148.1519508 | 0.738802825 | 0.202234058 | 3.653206744 | 0.000258986    | 0.000728939 |
| Zcrb1         | 592.0637645 | 0.738764693 | 0.19796838  | 3.731730755 | 0.000190169    | 0.000548468 |
| Zmym5         | 726.8674853 | 0.738634264 | 0.190331883 | 3.880770022 | 0.000104126    | 0.000313911 |
| Gm17970       | 3.963321197 | 0.738605825 | 0.908392694 | 0.813090891 | 0.416165948    | 0.508186884 |
| Znhit2        | 271.7979452 | 0.738339476 | 0.216644333 | 3.408071959 | 0.000654236    | 0.001709075 |
| Tmem8b        | 40.63447235 | 0.738257184 | 0.397274309 | 1.858305877 | 0.06312559     | 0.103318457 |
| 170000119Rik  | 0.381772768 | 0.738250051 | 3.632826404 | 0.20321644  | 0.838965863 NA |             |
| Spr           | 1463.204461 | 0.73814556  | 0.161321381 | 4.575621378 | 4.75E-06       | 1.75E-05    |
| Gm13573       | 1.382819716 | 0.737970153 | 1.716455586 | 0.429938391 | 0.667240458 NA |             |
| Wdfy1         | 376.9814754 | 0.737223389 | 0.191461316 | 3.850508309 | 0.000117873    | 0.000351557 |
| Malsu1        | 277.828816  | 0.737104431 | 0.152939415 | 4.819584484 | 1.44E-06       | 5.68E-06    |
| Ergic2        | 1011.384504 | 0.737016944 | 0.153395902 | 4.804671671 | 1.55E-06       | 6.08E-06    |
| Rasgrp2       | 316.7963903 | 0.736860609 | 0.332719211 | 2.214662046 | 0.02678327     | 0.048714519 |
| Tns2          | 1804.430298 | 0.73682659  | 0.324264411 | 2.272301754 | 0.023068291    | 0.04270477  |
| Map2k7        | 956.6601003 | 0.736429375 | 0.180782959 | 4.073555263 | 4.63E-05       | 0.000147567 |
| Zfp960        | 154.5254168 | 0.736380283 | 0.265283277 | 2.775826249 | 0.005506163    | 0.01187164  |
| Taf10         | 1084.647483 | 0.735866267 | 0.171001561 | 4.303272222 | 1.68E-05       | 5.74E-05    |
| Naa25         | 433.9988963 | 0.735865085 | 0.201728784 | 3.647794187 | 0.000264501    | 0.000743074 |
| Cables2       | 524.8786408 | 0.735822368 | 0.180018956 | 4.087471578 | 4.36E-05       | 0.000139565 |
| Cemip         | 5.501963965 | 0.73578585  | 0.803626682 | 0.915581658 | 0.359886355    | 0.452192113 |
| Gde1          | 764.4025314 | 0.735775306 | 0.231420623 | 3.179385202 | 0.001475878    | 0.003593369 |
| Pts           | 804.2228119 | 0.735658282 | 0.215752794 | 3.409727722 | 0.000650278    | 0.001700297 |
| Pou1f1        | 1.267042947 | 0.73553578  | 1.580030893 | 0.465519872 | 0.641559209 NA |             |
| Tekt2         | 10.25437471 | 0.735457735 | 0.65133881  | 1.129147725 | 0.258835521    | 0.343769708 |
| Atrn          | 1152.39492  | 0.735438844 | 0.174136618 | 4.22334402  | 2.41E-05       | 8.02E-05    |
| Vmn1r75       | 3.485536561 | 0.735094489 | 1.277846432 | 0.575260431 | 0.565115178    | 0.649356683 |
| Ly6a2         | 13.50116358 | 0.734329758 | 0.53230299  | 1.379533409 | 0.167730353    | 0.239085874 |
| Csnk2b        | 1255.829588 | 0.734172958 | 0.154514607 | 4.75147931  | 2.02E-06       | 7.80E-06    |
| Bdh2          | 323.4502204 | 0.733991441 | 0.328997103 | 2.230996669 | 0.02568135     | 0.046895421 |
| Ranbp9        | 647.394314  | 0.733542019 | 0.163607065 | 4.483559564 | 7.34E-06       | 2.64E-05    |
| Qpctl         | 213.7400261 | 0.733154673 | 0.181111289 | 4.048089309 | 5.16E-05       | 0.000163142 |
| Ankrd9        | 32.0141788  | 0.733085599 | 0.432710559 | 1.69417081  | 0.09023283     | 0.141595111 |
| Psmg3         | 218.1171625 | 0.732641862 | 0.199497512 | 3.672436074 | 0.000240249    | 0.000680247 |
| Tcn2          | 1308.452555 | 0.732496557 | 0.145732127 | 5.02632172  | 5.00E-07       | 2.09E-06    |
| Rhou          | 1049.738841 | 0.732488643 | 0.189852346 | 3.858201691 | 0.000114224    | 0.000341991 |
| Pik3r4        | 380.2991742 | 0.731810019 | 0.196661575 | 3.72116424  | 0.000198306    | 0.00057001  |
| Kti12         | 243.8053764 | 0.731728015 | 0.202916531 | 3.606054223 | 0.000310888    | 0.000860673 |
| Sil1          | 919.84028   | 0.730891334 | 0.183310034 | 3.987186715 | 6.69E-05       | 0.000207851 |

|               |             |             |             |             |                |             |
|---------------|-------------|-------------|-------------|-------------|----------------|-------------|
| Prpsap1       | 1075.961725 | 0.730559243 | 0.166695511 | 4.382596967 | 1.17E-05       | 4.09E-05    |
| Gnal          | 26.43016258 | 0.730408616 | 0.475998412 | 1.534477001 | 0.124912347    | 0.186585972 |
| Elac1         | 164.7918073 | 0.730355835 | 0.206673142 | 3.533869129 | 0.000409524    | 0.00111136  |
| Nr1i2         | 1508.536033 | 0.730138465 | 0.27237638  | 2.680623276 | 0.007348519    | 0.015399822 |
| Ppef2         | 2.948212137 | 0.729307811 | 1.118353465 | 0.652126393 | 0.514319639    | 0.603117431 |
| Serinc2       | 233.312412  | 0.729055215 | 0.281642065 | 2.588587807 | 0.009637037    | 0.019643397 |
| Gramd3        | 645.7457503 | 0.728986562 | 0.172923274 | 4.215664804 | 2.49E-05       | 8.27E-05    |
| Bbs10         | 97.83628456 | 0.728937179 | 0.33254653  | 2.191985522 | 0.028380552    | 0.051264214 |
| Psmc2         | 1338.257956 | 0.728834688 | 0.234360962 | 3.109880945 | 0.001871628    | 0.004452625 |
| Emc2          | 454.0291483 | 0.728578416 | 0.141918863 | 5.133767275 | 2.84E-07       | 1.23E-06    |
| Fbxl4         | 308.6334892 | 0.728238694 | 0.149112373 | 4.883824741 | 1.04E-06       | 4.19E-06    |
| Tent4b        | 627.9476422 | 0.728112812 | 0.176255508 | 4.131007432 | 3.61E-05       | 0.000117149 |
| Rgs3          | 201.3507703 | 0.727561539 | 0.367125106 | 1.981780945 | 0.047503763    | 0.080774402 |
| Sc1t1         | 132.3615996 | 0.727462826 | 0.234950625 | 3.096237037 | 0.001959936    | 0.004639405 |
| Oxa1l         | 962.3120566 | 0.727387713 | 0.255188019 | 2.850399155 | 0.004366439    | 0.009619935 |
| Stk40         | 483.6017859 | 0.727361329 | 0.169995793 | 4.278701928 | 1.88E-05       | 6.36E-05    |
| Zdhc19        | 1.400336169 | 0.727331235 | 1.444987856 | 0.503347646 | 0.614719874 NA |             |
| Hdhd2         | 420.1302395 | 0.726779035 | 0.13436827  | 5.408859069 | 6.34E-08       | 2.98E-07    |
| Sptbn2        | 1628.181084 | 0.726618705 | 0.21999172  | 3.30293661  | 0.00095678     | 0.002422933 |
| Eif3g         | 1122.350692 | 0.726565561 | 0.128025595 | 5.675158649 | 1.39E-08       | 7.05E-08    |
| Msh4          | 13.0826435  | 0.726412917 | 0.528645215 | 1.374102888 | 0.169409743    | 0.241139554 |
| Dusp23        | 298.3900538 | 0.726349908 | 0.216106574 | 3.361072718 | 0.000776404    | 0.001997605 |
| Fam222b       | 279.4894298 | 0.726287158 | 0.162560096 | 4.467807152 | 7.90E-06       | 2.83E-05    |
| Vps53         | 516.5012141 | 0.726156638 | 0.179028909 | 4.056085918 | 4.99E-05       | 0.000158069 |
| Ubr2          | 1321.754976 | 0.726124655 | 0.201040135 | 3.611839269 | 0.000304033    | 0.000842926 |
| Cdv3          | 1596.764813 | 0.725703569 | 0.14301168  | 5.074435664 | 3.89E-07       | 1.65E-06    |
| Capn12        | 1.005388769 | 0.725569255 | 2.279966755 | 0.31823677  | 0.750305343 NA |             |
| Mrpl9         | 584.3775941 | 0.72528009  | 0.143136721 | 5.067044194 | 4.04E-07       | 1.71E-06    |
| Utp14a        | 415.6917741 | 0.725276322 | 0.135860885 | 5.338374778 | 9.38E-08       | 4.32E-07    |
| Pgam1         | 2667.921371 | 0.725194894 | 0.106628054 | 6.801164139 | 1.04E-11       | 7.59E-11    |
| Bud23         | 511.2564816 | 0.724636065 | 0.259726184 | 2.79000005  | 0.005270803    | 0.011404576 |
| Olfr57        | 21.82636045 | 0.72411887  | 0.509837628 | 1.420293109 | 0.155522367    | 0.224709323 |
| Trmt13        | 160.7540025 | 0.723740803 | 0.170297637 | 4.249858156 | 2.14E-05       | 7.18E-05    |
| Vmn1r202      | 4.257972925 | 0.723697824 | 0.972260073 | 0.744345925 | 0.456667224    | 0.54744834  |
| Rtbdn         | 4.07469745  | 0.72355344  | 0.864051093 | 0.837396591 | 0.402369681    | 0.495385161 |
| Snim11        | 228.516319  | 0.723460829 | 0.236335814 | 3.061156141 | 0.002204841    | 0.005171018 |
| Cnbp          | 4709.622039 | 0.723424332 | 0.154199209 | 4.691491861 | 2.71E-06       | 1.03E-05    |
| Gm42791       | 7.294220283 | 0.723405318 | 1.276525841 | 0.56669853  | 0.570919019    | 0.655158013 |
| Ttc4          | 406.9909539 | 0.723149236 | 0.159473611 | 4.53460126  | 5.77E-06       | 2.11E-05    |
| Cd79a         | 21.4475351  | 0.723080779 | 0.476145395 | 1.518613406 | 0.128859835    | 0.191550625 |
| Reep3         | 1343.655374 | 0.723060195 | 0.145524005 | 4.968666127 | 6.74E-07       | 2.78E-06    |
| Ncbp2         | 405.732935  | 0.7226727   | 0.17908186  | 4.035432188 | 5.45E-05       | 0.000171524 |
| Camk2b        | 117.1067792 | 0.722408225 | 0.32814298  | 2.20150443  | 0.027700333    | 0.05014178  |
| Khyn          | 1182.944595 | 0.721976428 | 0.193763222 | 3.726075684 | 0.000194484    | 0.000559872 |
| F8            | 103.6712318 | 0.721968688 | 0.291895555 | 2.473380203 | 0.013384167    | 0.026284216 |
| Olfr1459      | 25.37348866 | 0.72154898  | 0.509868193 | 1.415167666 | 0.157019342    | 0.226373425 |
| Sspo          | 34.00125968 | 0.721109381 | 0.640428424 | 1.125979664 | 0.260174127    | 0.345278571 |
| Gm35339       | 84.88661384 | 0.720999737 | 0.256158981 | 2.81465727  | 0.004882928    | 0.010636871 |
| Zfp524        | 198.8150921 | 0.720945859 | 0.189456332 | 3.805340539 | 0.000141609    | 0.000417457 |
| Rnf167        | 929.2082155 | 0.720217542 | 0.14711729  | 4.895532964 | 9.80E-07       | 3.96E-06    |
| Cptp          | 229.5055129 | 0.720195821 | 0.30229549  | 2.382423309 | 0.017199114    | 0.032863763 |
| Zcwpw2        | 3.131766719 | 0.71952079  | 1.151082184 | 0.625082032 | 0.53191722     | 0.619619048 |
| Mob3c         | 259.1430075 | 0.719224322 | 0.189828622 | 3.788808641 | 0.000151371    | 0.000444009 |
| Nudt17        | 4.375457515 | 0.718906123 | 0.872852608 | 0.823628315 | 0.410150782    | 0.502415529 |
| Bpgm          | 223.9598936 | 0.718799535 | 0.178079443 | 4.036398147 | 5.43E-05       | 0.000170915 |
| Zfyve1        | 1059.555647 | 0.718498671 | 0.231664912 | 3.101456599 | 0.001925711    | 0.004567268 |
| Gm8741        | 18.84312308 | 0.71811148  | 0.926428795 | 0.775143005 | 0.438255162    | 0.529621748 |
| Tti2          | 192.2045555 | 0.718076642 | 0.170931047 | 4.200972577 | 2.66E-05       | 8.78E-05    |
| Hs3st4        | 0.597219167 | 0.717949695 | 2.864597189 | 0.250628499 | 0.802101346 NA |             |
| Rgp1          | 704.4906    | 0.717940339 | 0.273378624 | 2.626175846 | 0.008635019    | 0.017802614 |
| Pqbp1         | 515.516886  | 0.717770463 | 0.163155204 | 4.39931086  | 1.09E-05       | 3.81E-05    |
| Msln          | 18.41554611 | 0.71764666  | 0.593784281 | 1.20859828  | 0.226817218    | 0.3085525   |
| Gnl2          | 670.6804227 | 0.717556066 | 0.121266697 | 5.917173352 | 3.28E-09       | 1.80E-08    |
| Gns           | 2304.182696 | 0.717147785 | 0.163763604 | 4.379164638 | 1.19E-05       | 4.15E-05    |
| Ube2q2        | 380.6719295 | 0.716979024 | 0.151593864 | 4.729604533 | 2.25E-06       | 8.63E-06    |
| 4930562C15Rik | 5.063963303 | 0.716897797 | 0.82956698  | 0.864183139 | 0.387487293    | 0.47979978  |

|               |             |             |             |             |                |             |
|---------------|-------------|-------------|-------------|-------------|----------------|-------------|
| Slc35b1       | 801.6458597 | 0.716645061 | 0.206328333 | 3.473323562 | 0.000514055    | 0.001370171 |
| Cyp2j6        | 1578.568189 | 0.716489558 | 0.129924671 | 5.514653623 | 3.49E-08       | 1.69E-07    |
| C77080        | 1178.832185 | 0.716486782 | 0.153113257 | 4.679456226 | 2.88E-06       | 1.09E-05    |
| Gm42642       | 7.451016433 | 0.716418918 | 0.827638959 | 0.865617683 | 0.386699855    | 0.478963901 |
| Prpsap2       | 211.0315613 | 0.71640348  | 0.169491674 | 4.226776813 | 2.37E-05       | 7.91E-05    |
| Gcm1          | 17.62499357 | 0.715677493 | 0.540667021 | 1.323693634 | 0.185604813    | 0.260622549 |
| Hgs           | 221.1252447 | 0.71565477  | 0.162512911 | 4.403679478 | 1.06E-05       | 3.74E-05    |
| Tango2        | 461.7144582 | 0.715552816 | 0.208125241 | 3.438087623 | 0.000585838    | 0.00154723  |
| Oaz1          | 3781.919082 | 0.715148854 | 0.187094321 | 3.82239743  | 0.00013216     | 0.000391158 |
| Dus4l         | 76.06696555 | 0.715036649 | 0.250750782 | 2.851582931 | 0.004350214    | 0.009590384 |
| 2410141K09Rik | 2.209763147 | 0.715005565 | 2.167582079 | 0.329863202 | 0.741503329    | 0.802242845 |
| 4932438A13Rik | 834.6799805 | 0.714751597 | 0.164725269 | 4.339052532 | 1.43E-05       | 4.93E-05    |
| Phldb2        | 1450.783291 | 0.714164983 | 0.234055977 | 3.051257188 | 0.002278853    | 0.00532701  |
| Tbc1d10a      | 263.1969696 | 0.71374778  | 0.240000851 | 2.973938534 | 0.00294004     | 0.006722344 |
| Lrrc57        | 188.2279311 | 0.71374344  | 0.194758224 | 3.664766632 | 0.000247564    | 0.000698986 |
| Psm7          | 2001.477967 | 0.713452984 | 0.115720702 | 6.165301188 | 7.03E-10       | 4.16E-09    |
| Gm21992       | 182.5587812 | 0.71290863  | 0.248105596 | 2.873408102 | 0.004060692    | 0.009009198 |
| Snx3          | 1291.532182 | 0.712862491 | 0.168596046 | 4.228227804 | 2.36E-05       | 7.86E-05    |
| Fga           | 67686.20488 | 0.712517217 | 0.387068885 | 1.8408021   | 0.065650565    | 0.106896928 |
| Atp6v1h       | 949.3411067 | 0.71205985  | 0.11686448  | 6.093039111 | 1.11E-09       | 6.43E-09    |
| Polr2j        | 416.0294337 | 0.711735096 | 0.186711088 | 3.811959448 | 0.000137869    | 0.000407278 |
| Mapk1ip1      | 315.3798098 | 0.711536764 | 0.235010369 | 3.027682432 | 0.002464369    | 0.005716773 |
| Gm43587       | 27.90606488 | 0.711523567 | 0.475154795 | 1.497456353 | 0.134274554    | 0.198243059 |
| Abhd11        | 717.931747  | 0.711478878 | 0.211921163 | 3.357280921 | 0.000787131    | 0.002023068 |
| Exosc3        | 191.8241806 | 0.711363245 | 0.165299103 | 4.303491262 | 1.68E-05       | 5.73E-05    |
| Phykpl        | 296.2706176 | 0.711193768 | 0.220182909 | 3.230013489 | 0.001237844    | 0.003067262 |
| Gm12136       | 1.379136613 | 0.71114044  | 1.581535678 | 0.449651848 | 0.652961497 NA |             |
| Fam81a        | 124.7598474 | 0.710756489 | 0.433287187 | 1.640381971 | 0.100925772    | 0.15559618  |
| Deptor        | 2587.614482 | 0.710670094 | 0.185739534 | 3.82616495  | 0.000130155    | 0.000385424 |
| Setd6         | 333.6525643 | 0.710391134 | 0.206088101 | 3.447026444 | 0.000566793    | 0.001499952 |
| Eif2b1        | 424.4242896 | 0.710314743 | 0.19882794  | 3.572509685 | 0.000353576    | 0.000970187 |
| Gm11249       | 1.082127391 | 0.709874726 | 2.146512068 | 0.330710801 | 0.740862943 NA |             |
| Srp72         | 1695.278675 | 0.709791791 | 0.124608799 | 5.696161078 | 1.23E-08       | 6.28E-08    |
| Pnpt1         | 505.6188752 | 0.70962581  | 0.144026012 | 4.927067007 | 8.35E-07       | 3.41E-06    |
| Dnajb12       | 937.5927129 | 0.709029068 | 0.121436658 | 5.838674087 | 5.26E-09       | 2.81E-08    |
| Fyc1          | 839.0982753 | 0.708929431 | 0.176826418 | 4.009182778 | 6.09E-05       | 0.000190416 |
| Prpf38b       | 1306.175362 | 0.708922435 | 0.12899608  | 5.495689734 | 3.89E-08       | 1.87E-07    |
| Morn2         | 89.09854933 | 0.708205423 | 0.269416076 | 2.62866802  | 0.008572       | 0.017696228 |
| Zfp692        | 206.1604499 | 0.708090574 | 0.27393197  | 2.584913965 | 0.00974033     | 0.019822173 |
| Ubqln1        | 1980.471753 | 0.708031987 | 0.212236431 | 3.33605302  | 0.00084977     | 0.002174879 |
| Rpl3-ps2      | 0.949807292 | 0.707870762 | 2.25171904  | 0.314369044 | 0.753240764 NA |             |
| Gm16199       | 59.2644168  | 0.707523656 | 0.274692274 | 2.57569551  | 0.01000387     | 0.020305509 |
| U2af1         | 958.3667083 | 0.707482128 | 0.13111301  | 5.395971974 | 6.82E-08       | 3.19E-07    |
| Spock3        | 4.833198448 | 0.70738372  | 0.914702658 | 0.773348272 | 0.439316295    | 0.530565613 |
| Themis        | 20.21103303 | 0.707068166 | 0.713012832 | 0.991662611 | 0.321362136    | 0.412699186 |
| Zfp953        | 58.98521392 | 0.707008447 | 0.264520263 | 2.672795044 | 0.007522219    | 0.015734822 |
| Abce1         | 1450.585822 | 0.70686765  | 0.176013417 | 4.015987318 | 5.92E-05       | 0.00018531  |
| Tec           | 257.9145409 | 0.706330382 | 0.221213023 | 3.192987335 | 0.001408091    | 0.003448023 |
| Zfp369        | 307.1478199 | 0.706300606 | 0.182471738 | 3.870739733 | 0.000108506    | 0.000326129 |
| Vdac1         | 2979.881203 | 0.70619521  | 0.121022979 | 5.835215877 | 5.37E-09       | 2.87E-08    |
| S1pr1         | 669.8975123 | 0.705660667 | 0.214346672 | 3.292146599 | 0.000994258    | 0.002508154 |
| Gm4925        | 8.129721109 | 0.7056189   | 0.85956184  | 0.820905335 | 0.411700192    | 0.503852468 |
| Mrpl58        | 440.2144437 | 0.705491905 | 0.13579007  | 5.195460218 | 2.04E-07       | 9.07E-07    |
| Znrd2         | 193.8381326 | 0.705310544 | 0.17391597  | 4.05546739  | 5.00E-05       | 0.000158429 |
| Tbc1d7        | 136.7739966 | 0.70507009  | 0.237760571 | 2.965462633 | 0.003022281    | 0.006887293 |
| Gm10108       | 114.655306  | 0.704715455 | 0.277807816 | 2.536701324 | 0.011190238    | 0.022467457 |
| Wdr12         | 330.0965089 | 0.704262832 | 0.23414671  | 3.007784441 | 0.002631597    | 0.006068371 |
| Usf2          | 1129.435836 | 0.703991971 | 0.160149916 | 4.395831026 | 1.10E-05       | 3.87E-05    |
| Tmem53        | 231.4102685 | 0.703879706 | 0.219471296 | 3.207160667 | 0.001340521    | 0.00329836  |
| Slc30a1       | 475.8118983 | 0.703818951 | 0.182672771 | 3.852894701 | 0.00011673     | 0.000348696 |
| Tmem11        | 439.6293177 | 0.703680955 | 0.12293362  | 5.724072533 | 1.04E-08       | 5.39E-08    |
| Fuca1         | 1267.766003 | 0.703497652 | 0.181373294 | 3.878727886 | 0.000105004    | 0.000316386 |
| Cflar         | 1742.072767 | 0.70342997  | 0.168545745 | 4.173525539 | 3.00E-05       | 9.83E-05    |
| Eral1         | 351.0073401 | 0.703268451 | 0.175100603 | 4.01636796  | 5.91E-05       | 0.000185045 |
| Tfb2m         | 566.3029121 | 0.703243511 | 0.219112998 | 3.20950157  | 0.001329653    | 0.003275239 |
| Zfp943        | 258.4717349 | 0.703049146 | 0.216769487 | 3.243303083 | 0.001181525    | 0.002939243 |

|               |             |             |             |             |                |             |
|---------------|-------------|-------------|-------------|-------------|----------------|-------------|
| Wbp2          | 1732.21024  | 0.702980865 | 0.125869299 | 5.5850066   | 2.34E-08       | 1.16E-07    |
| Lrg1          | 6401.78778  | 0.702979676 | 0.718568485 | 0.978305743 | 0.32792313     | 0.419679052 |
| Pik3r1        | 1002.82084  | 0.702856028 | 0.162849883 | 4.315975013 | 1.59E-05       | 5.44E-05    |
| Prpf4         | 262.5557896 | 0.702825461 | 0.182812298 | 3.844519595 | 0.000120789    | 0.000359561 |
| Immt          | 2123.49797  | 0.702791842 | 0.131036647 | 5.363322827 | 8.17E-08       | 3.79E-07    |
| Wdr37         | 255.6916348 | 0.702778545 | 0.278436178 | 2.524020229 | 0.011602125    | 0.023201529 |
| Tbce          | 517.5280192 | 0.702493135 | 0.134990699 | 5.204011395 | 1.95E-07       | 8.69E-07    |
| Prorsd1       | 209.7866556 | 0.702212666 | 0.196404301 | 3.575342611 | 0.00034977     | 0.000960359 |
| Tmco4         | 231.4775627 | 0.701946065 | 0.204399515 | 3.434186553 | 0.000594335    | 0.001566516 |
| Eif1b         | 332.7603549 | 0.701606281 | 0.242158091 | 2.897306791 | 0.003763815    | 0.008405229 |
| Hmox2         | 820.5158894 | 0.701592836 | 0.150138379 | 4.672974618 | 2.97E-06       | 1.12E-05    |
| Comm1d1       | 631.1549727 | 0.70156818  | 0.190613062 | 3.680588174 | 0.000232697    | 0.000660288 |
| Cebpzos       | 274.0568295 | 0.700621042 | 0.186456645 | 3.757554701 | 0.000171582    | 0.000499169 |
| Gm15502       | 22.1829129  | 0.700356877 | 0.489085346 | 1.431972726 | 0.152151627    | 0.220474368 |
| Rpl36al       | 2741.771584 | 0.700262005 | 0.139659266 | 5.014074803 | 5.33E-07       | 2.23E-06    |
| Psmc1         | 1649.932225 | 0.700014114 | 0.189252539 | 3.698836046 | 0.00021659     | 0.000618809 |
| Gm14421       | 115.6544407 | 0.699671089 | 0.513268266 | 1.363168415 | 0.172829439    | 0.245328583 |
| Fgfr1op2      | 874.7570065 | 0.699316307 | 0.147661088 | 4.735955275 | 2.18E-06       | 8.38E-06    |
| Psm1d3        | 1573.233731 | 0.699064215 | 0.141693633 | 4.933631824 | 8.07E-07       | 3.31E-06    |
| Mrlp43        | 488.7849726 | 0.698402022 | 0.145122579 | 4.812497316 | 1.49E-06       | 5.86E-06    |
| Olfr1028      | 24.86971731 | 0.698021628 | 0.384338781 | 1.816162359 | 0.06934547     | 0.112248536 |
| Tmem50a       | 1149.644    | 0.697965254 | 0.191496537 | 3.644793089 | 0.000267607    | 0.00075085  |
| Gm14401       | 2.851847442 | 0.697913431 | 1.09615309  | 0.636693394 | 0.524324578    | 0.612532406 |
| Mlrps2        | 621.6091703 | 0.697829819 | 0.176757456 | 3.947951242 | 7.88E-05       | 0.000242514 |
| Olfr735       | 20.42873342 | 0.697607551 | 0.454979698 | 1.533271823 | 0.125208894    | 0.186914293 |
| Psmc6         | 1479.789214 | 0.697483438 | 0.107655183 | 6.47886537  | 9.24E-11       | 6.07E-10    |
| Olfr613       | 20.19241237 | 0.697333355 | 0.527187678 | 1.322742135 | 0.185921146    | 0.260999975 |
| Nudt1         | 234.73685   | 0.697287945 | 0.253091067 | 2.755087142 | 0.005867651    | 0.012566797 |
| Zfp58         | 90.61043773 | 0.697182123 | 0.255606785 | 2.727557184 | 0.00638052     | 0.013542717 |
| Fuz           | 204.7745474 | 0.696773762 | 0.192771563 | 3.614504921 | 0.000300922    | 0.000835252 |
| CAA01118383.1 | 469.254317  | 0.696718929 | 0.165885908 | 4.199988634 | 2.67E-05       | 8.81E-05    |
| Pigk          | 652.2136686 | 0.696361146 | 0.21217914  | 3.28194914  | 0.001030922    | 0.002592589 |
| Thyn1         | 304.9404364 | 0.69612823  | 0.203979284 | 3.412739839 | 0.000643133    | 0.001684457 |
| Prs41         | 2.427689644 | 0.696128194 | 1.236999203 | 0.562755572 | 0.573601337    | 0.657439532 |
| Zfp174        | 59.51875992 | 0.69608568  | 0.339385121 | 2.051020024 | 0.040264997    | 0.069816687 |
| Mlrps25       | 252.5239315 | 0.695403916 | 0.273894234 | 2.538950547 | 0.011118554    | 0.022339317 |
| Bst2          | 1994.091981 | 0.694979281 | 0.298043846 | 2.33180215  | 0.019711102    | 0.037110421 |
| Angel1        | 79.61649946 | 0.694976342 | 0.254699222 | 2.728615884 | 0.006360074    | 0.013507729 |
| Emc1          | 586.6556209 | 0.694920845 | 0.176863843 | 3.929128939 | 8.53E-05       | 0.000261076 |
| Trhr          | 3.369112996 | 0.694847795 | 1.013929198 | 0.685302087 | 0.493153315    | 0.583109843 |
| Chchd1        | 431.976188  | 0.694843669 | 0.155149144 | 4.478553024 | 7.52E-06       | 2.70E-05    |
| 4632433K11Rik | 2.205062535 | 0.694476428 | 1.998468013 | 0.3475044   | 0.728212413    | 0.791442383 |
| Cog8          | 593.0723764 | 0.69439387  | 0.123169318 | 5.637717914 | 1.72E-08       | 8.67E-08    |
| Atat1         | 445.9553099 | 0.694110835 | 0.174914897 | 3.968277407 | 7.24E-05       | 0.000223866 |
| Vma21         | 534.9239946 | 0.693763922 | 0.280587693 | 2.472538669 | 0.01341572     | 0.026340112 |
| Nrd1          | 1208.404949 | 0.693754404 | 0.222158056 | 3.122796515 | 0.001791416    | 0.004278517 |
| Ilrun         | 3255.129924 | 0.693664792 | 0.135361423 | 5.124538282 | 2.98E-07       | 1.29E-06    |
| Rap1a         | 987.0973566 | 0.693554206 | 0.201786408 | 3.437070981 | 0.000588041    | 0.001552568 |
| Enox1         | 2.738245189 | 0.693333074 | 1.255026145 | 0.552445124 | 0.580643422    | 0.66412674  |
| Srpr          | 2416.656121 | 0.693304933 | 0.21859009  | 3.171712562 | 0.001515429    | 0.003677062 |
| C1ra          | 6234.016812 | 0.693220572 | 0.196025745 | 3.536375146 | 0.000405658    | 0.001101922 |
| Aldoc         | 276.1457257 | 0.6929189   | 0.219576453 | 3.155706776 | 0.001601097    | 0.003868411 |
| Gimp          | 1041.568508 | 0.692868423 | 0.196425351 | 3.527387989 | 0.000419681    | 0.001136934 |
| Nelfe         | 443.028303  | 0.692483778 | 0.165012437 | 4.196555061 | 2.71E-05       | 8.94E-05    |
| Zfhx4         | 435.5678847 | 0.69245938  | 0.208943476 | 3.314099072 | 0.000919389    | 0.002336924 |
| Smdt1         | 628.4875878 | 0.692426025 | 0.142733376 | 4.851185091 | 1.23E-06       | 4.89E-06    |
| Tacr1         | 6.170762449 | 0.692223893 | 0.735265949 | 0.941460562 | 0.346468891    | 0.438858879 |
| Speer5-ps1    | 22.91748774 | 0.692163067 | 0.374208412 | 1.849672655 | 0.064360744    | 0.105047579 |
| Pced1a        | 411.3872505 | 0.692073434 | 0.196516866 | 3.521699933 | 0.000428789    | 0.001159581 |
| Cmc1          | 249.8854302 | 0.691633411 | 0.218995084 | 3.158214328 | 0.001587388    | 0.003839097 |
| Zdhhc9        | 1580.156699 | 0.690666313 | 0.143655095 | 4.807809374 | 1.53E-06       | 5.99E-06    |
| Gm14412       | 1.419491889 | 0.69054677  | 1.586492613 | 0.4352663   | 0.663369143 NA |             |
| Sec11c        | 576.4876466 | 0.690426936 | 0.201720007 | 3.422699349 | 0.000620026    | 0.00162844  |
| Gm5822        | 3.089031931 | 0.690244589 | 1.017937363 | 0.678081594 | 0.49771996     | 0.587450144 |
| Gm32742       | 5.201689186 | 0.690054076 | 0.890791878 | 0.774652412 | 0.438545078    | 0.52993454  |
| Tmem82        | 531.8832763 | 0.68914223  | 0.155243113 | 4.439116288 | 9.03E-06       | 3.21E-05    |



|               |             |             |             |             |                |             |
|---------------|-------------|-------------|-------------|-------------|----------------|-------------|
| Olf1r11       | 8.589509466 | 0.688937801 | 0.654645662 | 1.052382749 | 0.29262398     | 0.381862647 |
| Ccdc13        | 0.165624614 | 0.688480069 | 3.641134048 | 0.189083967 | 0.850027008 NA |             |
| Dap3          | 740.7360978 | 0.688167604 | 0.179852266 | 3.826293767 | 0.000130087    | 0.000385289 |
| Zfp729a       | 3431.257858 | 0.687719474 | 0.181243909 | 3.794441853 | 0.000147976    | 0.000435097 |
| Gm5108        | 3.622649087 | 0.687486715 | 1.165998934 | 0.589611787 | 0.555450947    | 0.640468566 |
| Sap30l        | 342.4144871 | 0.687447628 | 0.193234963 | 3.557573721 | 0.000374296    | 0.00102358  |
| Olfm1l        | 219.4011852 | 0.687411052 | 0.188779349 | 3.641346668 | 0.000271216    | 0.000760134 |
| Abtb1         | 565.1046411 | 0.687238833 | 0.173522464 | 3.960517956 | 7.48E-05       | 0.000230723 |
| Vsx2          | 6.086211341 | 0.686684162 | 0.99179901  | 0.692362217 | 0.488709887    | 0.578658574 |
| Brinp2        | 3.187340068 | 0.686650031 | 1.123883231 | 0.610962076 | 0.541224687    | 0.628057891 |
| Ushbp1        | 274.8352796 | 0.686563529 | 0.212162939 | 3.236020076 | 0.001212089    | 0.00300869  |
| 8-Mar         | 1488.453068 | 0.686024336 | 0.151494545 | 4.528376498 | 5.94E-06       | 2.17E-05    |
| Hfe           | 757.2845252 | 0.68569865  | 0.324260149 | 2.114655941 | 0.034459282    | 0.060820151 |
| Vmn1r173      | 1.889914131 | 0.685406851 | 1.777542917 | 0.385592294 | 0.699798641    | 0.767954119 |
| Irf6          | 1020.286762 | 0.685345653 | 0.193421553 | 3.543274478 | 0.000395191    | 0.001075202 |
| Olf1r1322     | 2.349878763 | 0.685266372 | 1.24600598  | 0.549970372 | 0.582339695    | 0.665664954 |
| Mier3         | 277.5979227 | 0.684966515 | 0.163154546 | 4.198268038 | 2.69E-05       | 8.88E-05    |
| Hnrnp3        | 411.9630114 | 0.684939126 | 0.217390533 | 3.150731156 | 0.001628623    | 0.003929347 |
| Eya1          | 1.235601378 | 0.684927185 | 1.752857932 | 0.39074883  | 0.695982902 NA |             |
| Odf4          | 0.310327476 | 0.684909302 | 3.642681475 | 0.188023385 | 0.850858319 NA |             |
| Tmem259       | 2253.442681 | 0.684803896 | 0.123601195 | 5.540431042 | 3.02E-08       | 1.47E-07    |
| Rb1cc1        | 688.816583  | 0.684707588 | 0.174064215 | 3.933649369 | 8.37E-05       | 0.000256674 |
| Pstpip2       | 101.2111693 | 0.684595065 | 0.276124408 | 2.479299352 | 0.013164077    | 0.025887783 |
| Akirin1       | 455.3180156 | 0.684509486 | 0.177407488 | 3.858402447 | 0.000114131    | 0.00034177  |
| E130311K13Rik | 112.1093727 | 0.684505136 | 0.236987464 | 2.888360102 | 0.003872562    | 0.00862661  |
| Dcun1d2       | 235.8877125 | 0.684440823 | 0.14922203  | 4.586727727 | 4.50E-06       | 1.67E-05    |
| Vmn1r17       | 0.618059265 | 0.684264169 | 2.427394543 | 0.281892439 | 0.778025987 NA |             |
| Crtc2         | 698.4578599 | 0.684055707 | 0.168700601 | 4.054850457 | 5.02E-05       | 0.000158818 |
| Abli1m2       | 62.38702455 | 0.68379622  | 0.318026738 | 2.150121795 | 0.031545582    | 0.05631889  |
| Olf1r461      | 1.895710166 | 0.683776259 | 2.377956352 | 0.287547859 | 0.773692862    | 0.829085166 |
| Timm10b       | 414.5341629 | 0.683755865 | 0.164193539 | 4.164328696 | 3.12E-05       | 0.000102141 |
| Nbas          | 372.7227625 | 0.683738151 | 0.175326494 | 3.899799378 | 9.63E-05       | 0.00029209  |
| Ahcy1         | 2042.949986 | 0.682934227 | 0.110410716 | 6.185398043 | 6.19E-10       | 3.69E-09    |
| Spaca7        | 0.910293386 | 0.682344852 | 2.257528883 | 0.302252989 | 0.762459213 NA |             |
| Xkr8          | 87.2989754  | 0.681978631 | 0.333817027 | 2.042971378 | 0.041055272    | 0.071034994 |
| Spryd4        | 442.3360509 | 0.681913757 | 0.226252142 | 3.013954924 | 0.002578661    | 0.005956777 |
| Atp6v0b       | 1147.745329 | 0.681880312 | 0.113304577 | 6.01811797  | 1.76E-09       | 9.95E-09    |
| Zbtb11        | 259.163562  | 0.681845313 | 0.189329701 | 3.601364754 | 0.000316551    | 0.000875213 |
| Gm10123       | 3301.609322 | 0.68159309  | 0.140890473 | 4.837751435 | 1.31E-06       | 5.21E-06    |
| Apol9a        | 1114.600242 | 0.681522952 | 0.34458127  | 1.977829357 | 0.047947961    | 0.081432241 |
| Preb          | 1639.01404  | 0.681488563 | 0.165470039 | 4.118501256 | 3.81E-05       | 0.000123128 |
| Gpc5          | 0.525564628 | 0.681323816 | 2.944004786 | 0.231427551 | 0.816982664 NA |             |
| Met1l8        | 182.4675277 | 0.681317148 | 0.207680996 | 3.280594562 | 0.001035885    | 0.002602383 |
| Ppif          | 704.8497971 | 0.681152196 | 0.268459547 | 2.537261957 | 0.011172332    | 0.022436791 |
| Paics         | 2878.523534 | 0.680880861 | 0.137483481 | 4.952455803 | 7.33E-07       | 3.01E-06    |
| Gm11518       | 1125.772857 | 0.680875338 | 0.33912941  | 2.007715398 | 0.044673543    | 0.076496039 |
| Opa1          | 1234.794404 | 0.680855121 | 0.130778287 | 5.206178611 | 1.93E-07       | 8.60E-07    |
| Csde1         | 2910.429122 | 0.680853672 | 0.166960051 | 4.077943612 | 4.54E-05       | 0.000145054 |
| Acbd6         | 535.8818511 | 0.680460627 | 0.151639129 | 4.487368342 | 7.21E-06       | 2.60E-05    |
| Entpd5        | 4373.145241 | 0.680139706 | 0.275665975 | 2.467260267 | 0.013615136    | 0.026682473 |
| Gm10260       | 1.371266603 | 0.679756333 | 1.771199183 | 0.383783111 | 0.701139207 NA |             |
| Ltb4r1        | 16.81112425 | 0.679642356 | 0.539183721 | 1.260502366 | 0.207488195    | 0.286090012 |
| Tmlhe         | 182.710288  | 0.679479094 | 0.374531271 | 1.814211912 | 0.069645107    | 0.112626616 |
| 1700029115Rik | 35.54660193 | 0.679254036 | 0.463240383 | 1.466310066 | 0.142563834    | 0.208459409 |
| Gm14335       | 1.911786993 | 0.679044215 | 1.363024726 | 0.498189212 | 0.618350685    | 0.698260746 |
| Fbxo36        | 120.4959253 | 0.67898779  | 0.347806385 | 1.952200473 | 0.050914408    | 0.085744229 |
| Ankra2        | 251.3419005 | 0.678932773 | 0.195653936 | 3.470069586 | 0.000520324    | 0.001385146 |
| Zfp784        | 60.55332401 | 0.678522435 | 0.284349011 | 2.386231034 | 0.017022054    | 0.03255463  |
| Crebzf        | 714.6947937 | 0.678231353 | 0.202611559 | 3.347446491 | 0.000815597    | 0.002091502 |
| Mrpl11        | 490.7964101 | 0.678194323 | 0.139386503 | 4.865566677 | 1.14E-06       | 4.57E-06    |
| Gabarap       | 3604.288499 | 0.677993061 | 0.118534316 | 5.71980406  | 1.07E-08       | 5.51E-08    |
| Tcta          | 302.1980815 | 0.677790596 | 0.244138558 | 2.776253788 | 0.005498927    | 0.011857539 |
| Fam98c        | 276.0413497 | 0.677576848 | 0.199373644 | 3.398527681 | 0.000677496    | 0.001762544 |
| Erp27         | 1.289723153 | 0.677404704 | 1.53940652  | 0.440042767 | 0.659906133 NA |             |
| Drg2          | 699.7732223 | 0.677241524 | 0.134686909 | 5.028265406 | 4.95E-07       | 2.07E-06    |
| Gm10054       | 0.407703936 | 0.677237773 | 3.172363101 | 0.213480535 | 0.83095217 NA  |             |

|               |             |             |             |             |             |             |
|---------------|-------------|-------------|-------------|-------------|-------------|-------------|
| Ankrd13c      | 546.3901557 | 0.676729872 | 0.249747321 | 2.709658187 | 0.006735258 | 0.014224811 |
| Magt1         | 1110.829864 | 0.676628184 | 0.129576432 | 5.221846076 | 1.77E-07    | 7.93E-07    |
| Atoh8         | 322.7016014 | 0.676571168 | 0.366828097 | 1.844382078 | 0.065127477 | 0.106207503 |
| Srek1         | 847.4420977 | 0.676153364 | 0.157885575 | 4.282553126 | 1.85E-05    | 6.26E-05    |
| Mtmt1         | 520.713251  | 0.675758319 | 0.179656959 | 3.761381259 | 0.000168978 | 0.00049218  |
| Dmap1         | 232.518115  | 0.675483087 | 0.191984361 | 3.518427662 | 0.000434112 | 0.001173041 |
| Dclk2         | 37.55492213 | 0.675472381 | 0.485626417 | 1.390930059 | 0.164246637 | 0.234826959 |
| Gm6580        | 4.872161918 | 0.675012793 | 1.159397614 | 0.58220992  | 0.560425292 | 0.64554935  |
| Insc          | 246.5589892 | 0.674802529 | 0.37685584  | 1.790611841 | 0.073355606 | 0.1179001   |
| H2-T22        | 1572.820637 | 0.674651717 | 0.260643462 | 2.588408366 | 0.00964206  | 0.01964597  |
| Ptcd3         | 771.2449171 | 0.674352883 | 0.155643269 | 4.332682586 | 1.47E-05    | 5.07E-05    |
| Prs55         | 1.755392024 | 0.674297374 | 1.331922265 | 0.506258805 | 0.612674979 | 0.693321144 |
| Deup1         | 7.580964027 | 0.673959676 | 0.740474117 | 0.910173172 | 0.36273119  | 0.455162765 |
| Gm15304       | 4.895942094 | 0.673898326 | 0.873792811 | 0.771233543 | 0.440568515 | 0.531872874 |
| Serinc1       | 3203.602963 | 0.673894025 | 0.126907872 | 5.310104215 | 1.10E-07    | 5.01E-07    |
| Btf314        | 824.8177381 | 0.673807469 | 0.151325272 | 4.452709466 | 8.48E-06    | 3.02E-05    |
| 6-Mar         | 1786.697937 | 0.673741633 | 0.124134352 | 5.427519659 | 5.71E-08    | 2.70E-07    |
| Hint1         | 3440.634986 | 0.673663726 | 0.119402824 | 5.641941326 | 1.68E-08    | 8.47E-08    |
| Gm47056       | 37.10685795 | 0.673635728 | 0.397992439 | 1.692584234 | 0.090534634 | 0.142003353 |
| Klhl36        | 91.89441018 | 0.673297643 | 0.212747095 | 3.164779496 | 0.001552005 | 0.003757788 |
| Nme6          | 201.6284678 | 0.673257176 | 0.243776697 | 2.761778232 | 0.005748751 | 0.012341608 |
| Afg3l2        | 1292.964013 | 0.672930866 | 0.113484472 | 5.929717579 | 3.03E-09    | 1.67E-08    |
| Orc3          | 358.5341282 | 0.672775427 | 0.172648388 | 3.896795297 | 9.75E-05    | 0.000295315 |
| Podn          | 64.80308056 | 0.672622445 | 0.422317735 | 1.592692868 | 0.111229108 | 0.169155561 |
| Zfp654        | 226.084563  | 0.672530057 | 0.225000032 | 2.989022056 | 0.002798719 | 0.006421611 |
| Otulin        | 542.5457206 | 0.672520891 | 0.203910303 | 3.298121187 | 0.000973341 | 0.002460122 |
| Ciao3         | 364.280532  | 0.672485443 | 0.17896353  | 3.75766751  | 0.000171505 | 0.000499114 |
| Gm5905        | 0.319241548 | 0.672299843 | 3.401420757 | 0.197652655 | 0.843316835 | NA          |
| D11Bhm181e    | 0.334212772 | 0.672275083 | 3.353451885 | 0.20047256  | 0.841111017 | NA          |
| Lrrc47        | 408.1033311 | 0.672151387 | 0.19289502  | 3.484545054 | 0.000492974 | 0.00131976  |
| Ube2j2        | 552.5615588 | 0.671870998 | 0.146831176 | 4.575806152 | 4.74E-06    | 1.75E-05    |
| Polr3a        | 353.3597937 | 0.671462135 | 0.195200389 | 3.439860649 | 0.000582014 | 0.001538321 |
| Cntn4         | 0.405824636 | 0.671213368 | 3.638013713 | 0.184499956 | 0.853621262 | NA          |
| Ackr4         | 7.411091775 | 0.671207958 | 0.889967747 | 0.754193576 | 0.450732994 | 0.541743943 |
| Gm5493        | 2.16920909  | 0.671185042 | 1.126651185 | 0.595734555 | 0.55135257  | 0.636905991 |
| Cfap77        | 2.4727594   | 0.670951251 | 1.254932604 | 0.534651222 | 0.592891057 | 0.675642161 |
| Nr2f6         | 1482.047155 | 0.670923564 | 0.121313072 | 5.530513341 | 3.19E-08    | 1.55E-07    |
| Ccnh          | 260.1607009 | 0.670858871 | 0.226107758 | 2.966987409 | 0.003007333 | 0.006859648 |
| Slc35e3       | 383.7046194 | 0.670187374 | 0.329323717 | 2.035041327 | 0.041846715 | 0.072184842 |
| Mtif2         | 562.0282885 | 0.670097888 | 0.189323861 | 3.539426485 | 0.000400997 | 0.00109013  |
| Npc1          | 1950.640025 | 0.669860081 | 0.242011964 | 2.76788003  | 0.005642222 | 0.01213277  |
| Gm7904        | 0.326229345 | 0.669788356 | 3.378286971 | 0.198262718 | 0.84283952  | NA          |
| Gsap          | 575.4108399 | 0.669761346 | 0.307649739 | 2.177025566 | 0.02947866  | 0.052944816 |
| Saraf         | 1767.022583 | 0.669725997 | 0.14648464  | 4.571987865 | 4.83E-06    | 1.78E-05    |
| Gm14323       | 0.320082171 | 0.669695163 | 3.398699124 | 0.197044557 | 0.84379267  | NA          |
| Gm9919        | 0.310130472 | 0.669481475 | 3.431891337 | 0.195076536 | 0.845333031 | NA          |
| Evi5          | 2040.067855 | 0.669374334 | 0.202798836 | 3.300681344 | 0.000964504 | 0.002440679 |
| Klk1          | 1.593510305 | 0.669317863 | 1.79490927  | 0.372897881 | 0.709224449 | NA          |
| Cul2          | 607.0574952 | 0.669283501 | 0.189670112 | 3.52867141  | 0.000417651 | 0.001132155 |
| Rhot1         | 640.4202711 | 0.66920129  | 0.194565006 | 3.43947405  | 0.000582846 | 0.001540042 |
| Slc7a6os      | 452.013805  | 0.669118565 | 0.168711377 | 3.966054784 | 7.31E-05    | 0.00022584  |
| Pcmtd2        | 861.953505  | 0.668963495 | 0.119094908 | 5.617062104 | 1.94E-08    | 9.73E-08    |
| Wwox          | 155.1262232 | 0.668765755 | 0.212667121 | 3.144659844 | 0.0016628   | 0.004001048 |
| 4930486L24Rik | 1.898088677 | 0.668389191 | 2.060944785 | 0.324312032 | 0.745701811 | 0.805418429 |
| Gm3617        | 0.333041263 | 0.667831188 | 3.356978701 | 0.198938166 | 0.842311114 | NA          |
| Gale          | 536.1361888 | 0.667792092 | 0.249320592 | 2.678447404 | 0.007396435 | 0.015492618 |
| Rnf141        | 655.142455  | 0.66758154  | 0.227744941 | 2.931268358 | 0.003375581 | 0.007625654 |
| Phb2          | 3036.000381 | 0.667283691 | 0.119672127 | 5.575932417 | 2.46E-08    | 1.22E-07    |
| Ctsh          | 3027.15251  | 0.66718471  | 0.159388853 | 4.185893153 | 2.84E-05    | 9.34E-05    |
| Rhobtb2       | 170.0442713 | 0.666916353 | 0.221769844 | 3.007245445 | 0.002636268 | 0.00607832  |
| Babam1        | 820.1709259 | 0.666651358 | 0.163849785 | 4.068673978 | 4.73E-05    | 0.000150383 |
| Star          | 19.94056538 | 0.666596579 | 0.472031773 | 1.412185825 | 0.157895253 | 0.227403559 |
| Gm12164       | 0.333972737 | 0.666566032 | 3.354151438 | 0.198728663 | 0.842475001 | NA          |
| Gm20150       | 0.310839593 | 0.666282872 | 3.429531624 | 0.194278096 | 0.845958136 | NA          |
| Pptc7         | 281.5214427 | 0.666143952 | 0.233159808 | 2.857027369 | 0.00427629  | 0.009449053 |
| Zfp598        | 1391.208802 | 0.665903633 | 0.142846548 | 4.661671158 | 3.14E-06    | 1.18E-05    |

|               |             |             |             |             |             |    |             |
|---------------|-------------|-------------|-------------|-------------|-------------|----|-------------|
| Rpl18-ps2     | 0.412605864 | 0.665866377 | 3.158070627 | 0.210845942 | 0.833007488 | NA |             |
| Yars2         | 281.0763534 | 0.665829228 | 0.156975516 | 4.241611977 | 2.22E-05    |    | 7.43E-05    |
| Arhgap32      | 219.2582324 | 0.665758001 | 0.266445546 | 2.498664403 | 0.01246623  |    | 0.024706382 |
| Gm7384        | 0.310712364 | 0.665517869 | 3.42999895  | 0.194028593 | 0.846153494 | NA |             |
| Gnpda1        | 365.4546606 | 0.665505273 | 0.344136125 | 1.933843105 | 0.053132421 |    | 0.088923689 |
| Kcnj16        | 5.733837822 | 0.665317514 | 1.086155432 | 0.612543559 | 0.540178188 |    | 0.627227744 |
| Zfp639        | 328.3517339 | 0.665266598 | 0.158067646 | 4.208746161 | 2.57E-05    |    | 8.51E-05    |
| Denr          | 627.1581972 | 0.665223822 | 0.153626881 | 4.330126458 | 1.49E-05    |    | 5.12E-05    |
| Rpl19-ps4     | 0.412375876 | 0.66494743  | 3.158449304 | 0.210529714 | 0.833254263 | NA |             |
| Gm14414       | 0.39629338  | 0.664839797 | 3.196658183 | 0.207979633 | 0.83524487  | NA |             |
| Gm15379       | 0.333744945 | 0.664754913 | 3.35487979  | 0.198145673 | 0.842931092 | NA |             |
| Gm5451        | 0.396264762 | 0.664731116 | 3.196712481 | 0.207942103 | 0.835274174 | NA |             |
| Clec2f        | 0.309469635 | 0.664641848 | 3.43428838  | 0.19353117  | 0.846542997 | NA |             |
| Lpcat3        | 2126.378778 | 0.664493595 | 0.155518576 | 4.272760294 | 1.93E-05    |    | 6.52E-05    |
| Olfr656       | 2.709891386 | 0.664091645 | 1.155212541 | 0.574865336 | 0.565382375 |    | 0.649547728 |
| Onecut2       | 881.7459659 | 0.663900856 | 0.291235353 | 2.279602556 | 0.022631271 |    | 0.041965218 |
| Gm7502        | 0.309337052 | 0.663841113 | 3.434779511 | 0.193270372 | 0.846747229 | NA |             |
| Tomt          | 3.271483091 | 0.663378276 | 1.119945056 | 0.59233109  | 0.553628901 |    | 0.638886178 |
| C030006K11Rik | 420.7062738 | 0.663339748 | 0.25340601  | 2.617695411 | 0.008852578 |    | 0.01819175  |
| Gm45739       | 1.407893246 | 0.663175498 | 1.592860569 | 0.416342466 | 0.677159422 | NA |             |
| Cir1          | 544.6403243 | 0.662556258 | 0.195114807 | 3.395725153 | 0.000684471 |    | 0.001779603 |
| Gm17911       | 0.33344525  | 0.662489824 | 3.3558418   | 0.197413902 | 0.843503652 | NA |             |
| Gm4875        | 0.310187613 | 0.66235269  | 3.431931533 | 0.192997058 | 0.846961272 | NA |             |
| Gm6767        | 0.319662703 | 0.662340344 | 3.399990643 | 0.19480652  | 0.845544418 | NA |             |
| Gm14148       | 0.325198584 | 0.662280325 | 3.381732444 | 0.195840545 | 0.844734974 | NA |             |
| Gm11185       | 0.309035399 | 0.661903154 | 3.435893219 | 0.192643692 | 0.847238025 | NA |             |
| Cxcr1         | 0.332312427 | 0.661886961 | 3.359321085 | 0.197029979 | 0.843804078 | NA |             |
| Grm5          | 6.627273659 | 0.661774134 | 0.714613983 | 0.926058193 | 0.354415739 |    | 0.44686632  |
| Pcp2          | 0.319623436 | 0.661628897 | 3.400111474 | 0.194590354 | 0.845713655 | NA |             |
| Gm18939       | 0.326092909 | 0.661106984 | 3.378935084 | 0.195655426 | 0.844879875 | NA |             |
| Golga7        | 1065.504214 | 0.660975891 | 0.143051412 | 4.620547842 | 3.83E-06    |    | 1.43E-05    |
| Pou5f2        | 0.32500732  | 0.660854444 | 3.382373867 | 0.195381844 | 0.845094029 | NA |             |
| Ap2s1         | 1116.827775 | 0.660739289 | 0.154303812 | 4.282067182 | 1.85E-05    |    | 6.27E-05    |
| Gm20784       | 0.326035929 | 0.660715293 | 3.379126073 | 0.195528453 | 0.844979265 | NA |             |
| Gm21378       | 0.326035929 | 0.660715293 | 3.379126073 | 0.195528453 | 0.844979265 | NA |             |
| Kpna1         | 620.0876716 | 0.660608569 | 0.146697755 | 4.503194797 | 6.69E-06    |    | 2.43E-05    |
| Gbp2-ps       | 0.418501818 | 0.660596352 | 3.143880978 | 0.210121298 | 0.833573003 | NA |             |
| Prr19         | 0.309864691 | 0.660460025 | 3.433128223 | 0.192378491 | 0.84744574  | NA |             |
| Gm5353        | 0.61202649  | 0.660411421 | 2.445454622 | 0.270056706 | 0.787116628 | NA |             |
| Ostn          | 0.411189428 | 0.660054073 | 3.160370146 | 0.208853407 | 0.834562678 | NA |             |
| Fam20a        | 637.9544472 | 0.660010784 | 0.21044857  | 3.136209411 | 0.001711469 |    | 0.004106124 |
| Cabp5         | 0.308736326 | 0.659973136 | 3.436999914 | 0.19202012  | 0.847726445 | NA |             |
| Gm3248        | 0.332059529 | 0.659815279 | 3.360136508 | 0.196365617 | 0.844324006 | NA |             |
| Sostdc1       | 0.333090675 | 0.659797187 | 3.356982358 | 0.196544729 | 0.844183827 | NA |             |
| Chil6         | 0.418288474 | 0.659664651 | 3.144198993 | 0.209803722 | 0.833820868 | NA |             |
| Cer1          | 0.309724164 | 0.659632904 | 3.433649925 | 0.192108374 | 0.847657316 | NA |             |
| Gm14442       | 0.418262912 | 0.659552917 | 3.144237114 | 0.209765642 | 0.83385059  | NA |             |
| Cxcl15        | 0.333041261 | 0.659421087 | 3.357141516 | 0.196423381 | 0.844278797 | NA |             |
| Gm5828        | 0.418221572 | 0.659372179 | 3.144298769 | 0.209704048 | 0.833898666 | NA |             |
| Gm50169       | 0.308640882 | 0.659355449 | 3.437353633 | 0.191820662 | 0.847882686 | NA |             |
| 4933412A08Rik | 2.464236501 | 0.659337682 | 1.077762425 | 0.611765327 | 0.540693033 |    | 0.627526369 |
| Tex19.1       | 0.394840521 | 0.659303445 | 3.199429857 | 0.206069042 | 0.836736981 | NA |             |
| Olfr124       | 0.318483413 | 0.659244478 | 3.403784525 | 0.193679851 | 0.84642657  | NA |             |
| Rnft1         | 518.0738386 | 0.659203806 | 0.182793781 | 3.606270416 | 0.000310629 |    | 0.000860096 |
| D1Pas1        | 0.404629538 | 0.65914093  | 3.175685349 | 0.207558639 | 0.835573602 | NA |             |
| Cts8          | 0.32580204  | 0.659104228 | 3.379910813 | 0.195006397 | 0.84538794  | NA |             |
| Olfr71        | 0.325795232 | 0.659057262 | 3.379933673 | 0.194991182 | 0.845399851 | NA |             |
| Gm47145       | 2.806005555 | 0.659031603 | 1.251383381 | 0.526642444 | 0.598441911 |    | 0.680875447 |
| Cisd2         | 610.0075672 | 0.658990802 | 0.12859701  | 5.124464432 | 2.98E-07    |    | 1.29E-06    |
| Gm6368        | 0.410933404 | 0.658986765 | 3.160784139 | 0.20848838  | 0.834847655 | NA |             |
| Sdf2l1        | 648.254885  | 0.658950618 | 0.264671168 | 2.489695508 | 0.012785258 |    | 0.025250588 |
| Tert          | 168.6073818 | 0.658895246 | 0.206990206 | 3.183219431 | 0.001456472 |    | 0.003550684 |
| Catsperb      | 0.394729837 | 0.658875227 | 3.199640449 | 0.205921646 | 0.836852117 | NA |             |
| Spag16        | 0.308564339 | 0.658859452 | 3.437637487 | 0.191660538 | 0.848008119 | NA |             |
| Mrpl52        | 797.5174754 | 0.658621869 | 0.174561676 | 3.773003814 | 0.000161294 |    | 0.000471007 |
| Magel2        | 0.404525117 | 0.658515002 | 3.175798572 | 0.207354146 | 0.83573329  | NA |             |



|              |             |             |             |             |                |             |
|--------------|-------------|-------------|-------------|-------------|----------------|-------------|
| C1galt1      | 892.8433677 | 0.658264214 | 0.181491092 | 3.626978097 | 0.000286758    | 0.000799713 |
| Myh6         | 0.332887813 | 0.658251494 | 3.35763609  | 0.19604611  | 0.844574076 NA |             |
| Zfp768       | 351.3808591 | 0.65817497  | 0.172229244 | 3.821505303 | 0.00013264     | 0.000392372 |
| Thrb         | 422.8618293 | 0.65810329  | 0.282325447 | 2.331009471 | 0.01975286     | 0.03717262  |
| Xirp2        | 0.331840085 | 0.658014916 | 3.360845197 | 0.195788523 | 0.844775694 NA |             |
| Grik2        | 3.316272049 | 0.65793865  | 1.149360281 | 0.572439    | 0.567024601    | 0.651302748 |
| Tmc4         | 142.0067097 | 0.657885135 | 0.324399304 | 2.028010319 | 0.042559195    | 0.073280391 |
| Slc26a7      | 0.410664585 | 0.657864013 | 3.161219309 | 0.208104516 | 0.835147361 NA |             |
| Umad1        | 215.818665  | 0.657731446 | 0.211386471 | 3.111511553 | 0.001861322    | 0.00443058  |
| Pou3f2       | 1.588412985 | 0.657718344 | 1.801019042 | 0.365192332 | 0.714967842 NA |             |
| Catsperg1    | 10.04797105 | 0.657374749 | 0.745863729 | 0.881360393 | 0.378122788    | 0.47014203  |
| Olf1432      | 1.917589212 | 0.657370548 | 1.530283552 | 0.429574341 | 0.667505305    | 0.740427513 |
| Akr1cl       | 5.463086653 | 0.657158157 | 0.919124166 | 0.714983004 | 0.474619545    | 0.565391238 |
| Marcks11-ps4 | 25.799755   | 0.657135896 | 0.522637433 | 1.257345637 | 0.208628505    | 0.287247517 |
| Fntb         | 124.9003996 | 0.656930094 | 0.200923113 | 3.269559613 | 0.00107715     | 0.002698495 |
| Pmm1         | 61.73673108 | 0.656771926 | 0.311907462 | 2.105662755 | 0.035233657    | 0.062000763 |
| Gm14296      | 306.4629826 | 0.656026423 | 0.214116797 | 3.063871827 | 0.002184925    | 0.005130368 |
| Zfp367       | 311.3980465 | 0.655366688 | 0.287342381 | 2.280786723 | 0.02256107     | 0.041852136 |
| Olf1463      | 1.371189023 | 0.65512315  | 1.851763746 | 0.353783333 | 0.723501265 NA |             |
| Tgs1         | 260.949987  | 0.654987394 | 0.197773863 | 3.311799574 | 0.000926979    | 0.00235376  |
| Polr2l       | 730.3200641 | 0.654672605 | 0.174470443 | 3.752341043 | 0.000175191    | 0.000508713 |
| Gm2673       | 2.095154904 | 0.654638928 | 1.283355754 | 0.510099344 | 0.609981865    | 0.690996687 |
| Zfpm1        | 740.0443073 | 0.6540914   | 0.191823151 | 3.409866838 | 0.000649946    | 0.00169969  |
| Trappc13     | 340.1194445 | 0.653424275 | 0.230294843 | 2.83733785  | 0.004549145    | 0.009981186 |
| Banp         | 207.4443792 | 0.653334515 | 0.230716927 | 2.831758054 | 0.004629286    | 0.010142664 |
| Sqle         | 1775.981548 | 0.653327493 | 0.226765532 | 2.881070535 | 0.003963269    | 0.008806806 |
| Prr14        | 769.4605612 | 0.652926377 | 0.145501121 | 4.487431943 | 7.21E-06       | 2.60E-05    |
| Gm50241      | 179.4432034 | 0.65281279  | 0.533425948 | 1.223811463 | 0.221023359    | 0.301802661 |
| Gm49183      | 1.757530242 | 0.652705587 | 2.02561294  | 0.322226213 | 0.747281327    | 0.806715556 |
| Cdc40        | 448.2749814 | 0.652359876 | 0.158762772 | 4.109022954 | 3.97E-05       | 0.000128025 |
| Phospho2     | 299.1917453 | 0.652241718 | 0.219608429 | 2.970021321 | 0.002977791    | 0.006797721 |
| Zfp748       | 80.86699581 | 0.651885564 | 0.326929991 | 1.993960735 | 0.046156346    | 0.078781876 |
| Prok1        | 59.17693807 | 0.651773796 | 0.652172854 | 0.99938811  | 0.317606717    | 0.409109129 |
| Kcnb1        | 17.06447087 | 0.651415246 | 0.659005969 | 0.988481557 | 0.322916862    | 0.414258911 |
| Pxl2a        | 1129.175218 | 0.651382407 | 0.186007029 | 3.501923612 | 0.000461912    | 0.001241475 |
| Gm8438       | 1.985324927 | 0.651066265 | 1.41424873  | 0.460361923 | 0.645256461    | 0.721393613 |
| Nlgn1        | 16.52064601 | 0.650971497 | 0.581267284 | 1.11991766  | 0.262748852    | 0.3481139   |
| Azi2         | 799.9428136 | 0.650966212 | 0.179874201 | 3.619008222 | 0.000295734    | 0.000822245 |
| Ngly1        | 561.3550109 | 0.650754596 | 0.163948109 | 3.969271736 | 7.21E-05       | 0.000223055 |
| C1galt1c1    | 340.8838666 | 0.650608884 | 0.202825607 | 3.207725557 | 0.001337891    | 0.003293802 |
| Odr4         | 748.7538797 | 0.650410741 | 0.151541995 | 4.291950503 | 1.77E-05       | 6.01E-05    |
| Zc3h13       | 463.8438494 | 0.650309447 | 0.218787681 | 2.972331183 | 0.002955477    | 0.006756735 |
| Rhbdd3       | 302.3463475 | 0.649495236 | 0.202022875 | 3.214958886 | 0.001304632    | 0.003219654 |
| Pitpnb       | 1299.802378 | 0.64948602  | 0.150156416 | 4.325396399 | 1.52E-05       | 5.22E-05    |
| Mrps17       | 790.0219823 | 0.649298102 | 0.176646085 | 3.675700487 | 0.000237198    | 0.000672501 |
| Nmrk1        | 442.2606402 | 0.649144085 | 0.305646194 | 2.123841548 | 0.033683395    | 0.05958644  |
| Rpl5-ps2     | 0.640513444 | 0.649110133 | 3.477877918 | 0.186639712 | 0.851943128 NA |             |
| Harbi1       | 257.9731308 | 0.648880416 | 0.235723585 | 2.752717404 | 0.005910289    | 0.012648582 |
| Mrps14       | 496.4559925 | 0.648393534 | 0.184477874 | 3.514749612 | 0.000440169    | 0.001187154 |
| Prox2        | 36.30819295 | 0.648297764 | 0.312227914 | 2.076360681 | 0.037860605    | 0.066118377 |
| Glrx2        | 386.9854596 | 0.647878924 | 0.149414414 | 4.336120628 | 1.45E-05       | 4.99E-05    |
| Cpsf4        | 368.4270342 | 0.647500467 | 0.200531581 | 3.228920174 | 0.001242586    | 0.003078564 |
| Fanci        | 36.23846473 | 0.647380396 | 0.481610713 | 1.344198498 | 0.178884207    | 0.252702848 |
| Taf15        | 1206.803047 | 0.647194359 | 0.131801046 | 4.910388657 | 9.09E-07       | 3.69E-06    |
| Mtg1         | 245.3091629 | 0.647007301 | 0.180265202 | 3.589196883 | 0.000331698    | 0.00091398  |
| Keap1        | 826.9772137 | 0.646989525 | 0.148383063 | 4.360265336 | 1.30E-05       | 4.50E-05    |
| Trim65       | 191.0884764 | 0.646588901 | 0.219604611 | 2.944332073 | 0.003236525    | 0.007333371 |
| Cntnap5a     | 5.581121431 | 0.646562444 | 0.914057693 | 0.707354087 | 0.479346462    | 0.569589355 |
| Fam207a      | 544.386945  | 0.646215808 | 0.21273627  | 3.037638144 | 0.002384401    | 0.005551662 |
| Zfp691       | 126.4649962 | 0.646147822 | 0.244447163 | 2.643302605 | 0.008210162    | 0.017011139 |
| Arl1         | 1713.210833 | 0.645840022 | 0.150385418 | 4.294565466 | 1.75E-05       | 5.95E-05    |
| Rbl2         | 577.3880687 | 0.64550988  | 0.184127392 | 3.50577865  | 0.000455274    | 0.001224792 |
| U2af114      | 191.1853124 | 0.645394676 | 0.204281895 | 3.159333703 | 0.001581303    | 0.003826552 |
| Wrap73       | 144.3824975 | 0.645293662 | 0.256868012 | 2.512160452 | 0.011999452    | 0.023883783 |
| Gm7061       | 5.059435369 | 0.645280547 | 0.866156194 | 0.744993284 | 0.45627578     | 0.547094493 |
| Tpp1         | 1550.306849 | 0.645212449 | 0.156407852 | 4.125192188 | 3.70E-05       | 0.000119852 |

|               |             |             |             |             |                |             |
|---------------|-------------|-------------|-------------|-------------|----------------|-------------|
| Pus10         | 251.2074227 | 0.64515451  | 0.222686059 | 2.89714818  | 0.003765718    | 0.008407277 |
| Ceacam3       | 5.58232158  | 0.645081376 | 0.796906164 | 0.809482227 | 0.418237822    | 0.50994982  |
| Fkbp15        | 656.6178836 | 0.644929924 | 0.16338852  | 3.947216866 | 7.91E-05       | 0.000243215 |
| Pxdc1         | 1105.288365 | 0.644926704 | 0.220271026 | 2.927878055 | 0.003412839    | 0.007696141 |
| Olfr802       | 3.692836408 | 0.644274305 | 1.149885058 | 0.560294527 | 0.57527856     | 0.658874631 |
| Creb3         | 589.1064426 | 0.64414825  | 0.230298275 | 2.797017255 | 0.005157678    | 0.01118109  |
| Gm14440       | 31.94028891 | 0.64367387  | 3.322188667 | 0.193749944 | 0.846371683    | 0.885863485 |
| Olfr1316      | 2.544238263 | 0.643647392 | 1.195557431 | 0.538365933 | 0.59032444     | 0.673167295 |
| Zfc3h1        | 1036.676912 | 0.643464186 | 0.157802512 | 4.077654898 | 4.55E-05       | 0.000145207 |
| Mfsd3         | 187.3997446 | 0.643321678 | 0.35237864  | 1.825654581 | 0.067902309    | 0.110257982 |
| Btd           | 1363.1429   | 0.643307209 | 0.205024675 | 3.137706275 | 0.001702754    | 0.004089337 |
| Ino80b        | 290.5154285 | 0.643049626 | 0.175037203 | 3.673788285 | 0.000238981    | 0.000677106 |
| Lhx2          | 32.7809982  | 0.643014714 | 0.445897782 | 1.442067532 | 0.149283323    | 0.216945026 |
| 1810018F18Rik | 0.639299476 | 0.642940575 | 2.808847428 | 0.228898362 | 0.818947914 NA |             |
| Nme3          | 237.8360081 | 0.642877201 | 0.15474921  | 4.154316526 | 3.26E-05       | 0.000106391 |
| Gm6649        | 2.378539324 | 0.642810808 | 1.22344558  | 0.525410217 | 0.599298052    | 0.681531132 |
| Os9           | 4642.722756 | 0.642808014 | 0.159929059 | 4.019332189 | 5.84E-05       | 0.000182867 |
| Cpped1        | 1031.530038 | 0.642749337 | 0.138550968 | 4.639082262 | 3.50E-06       | 1.32E-05    |
| Gpatch11      | 163.7391761 | 0.642662562 | 0.192612925 | 3.336549511 | 0.000848253    | 0.002171442 |
| 9930021J03Rik | 468.415557  | 0.642541234 | 0.191000111 | 3.364088276 | 0.00076797     | 0.00197979  |
| Col11a2       | 45.52163421 | 0.642369018 | 0.409748488 | 1.56771541  | 0.116947564    | 0.176524198 |
| Sap18b        | 1054.275182 | 0.642360627 | 0.150031129 | 4.28151564  | 1.86E-05       | 6.28E-05    |
| Pdik1l        | 158.1411924 | 0.642192656 | 0.178424166 | 3.599247062 | 0.00031914     | 0.000881962 |
| ldh3g         | 1185.506435 | 0.641724499 | 0.171201415 | 3.748359777 | 0.000177995    | 0.000515538 |
| Lrrc4b        | 0.633343328 | 0.641516939 | 2.419616809 | 0.265131626 | 0.790908065 NA |             |
| Trpm8         | 4.291609623 | 0.641493885 | 1.161516349 | 0.552290018 | 0.580749669    | 0.6642037   |
| Olfr642       | 1.412332173 | 0.641393577 | 2.069098047 | 0.309987039 | 0.756570813 NA |             |
| Gm19203       | 0.619301757 | 0.641285966 | 2.436830137 | 0.263164    | 0.792424177 NA |             |
| Faim          | 150.0855641 | 0.641207379 | 0.226522942 | 2.830650939 | 0.004645339    | 0.010171299 |
| Lamtor5       | 469.3883506 | 0.640890658 | 0.1937076   | 3.308546782 | 0.000937815    | 0.002379856 |
| Pdzd11        | 348.4200278 | 0.64088132  | 0.19670781  | 3.258036975 | 0.001121858    | 0.002802672 |
| Mrpl13        | 671.8079966 | 0.640809772 | 0.201229322 | 3.184475131 | 0.001450168    | 0.003537149 |
| Fastkd5       | 153.8720001 | 0.6406278   | 0.244643217 | 2.618620726 | 0.008828605    | 0.018146859 |
| Mat1a         | 24519.03159 | 0.640555182 | 0.654768531 | 0.978292559 | 0.327929649    | 0.419679052 |
| Mon2          | 1148.199823 | 0.640409161 | 0.183407726 | 3.491724015 | 0.000479914    | 0.001287018 |
| Zcchc7        | 584.8067934 | 0.63964081  | 0.192182647 | 3.328296396 | 0.000873788    | 0.002233    |
| Fam149b       | 458.5519938 | 0.639594892 | 0.156555248 | 4.085426075 | 4.40E-05       | 0.000140695 |
| Prpf3         | 277.9843036 | 0.639588237 | 0.219373247 | 2.915525237 | 0.003550904    | 0.007970482 |
| Alg3          | 225.2229215 | 0.639587595 | 0.220574506 | 2.899644241 | 0.003735864    | 0.008349789 |
| Tmem260       | 390.9101791 | 0.638800685 | 0.162746718 | 3.925121766 | 8.67E-05       | 0.000265128 |
| Gm17828       | 2.245594892 | 0.638763712 | 1.647920442 | 0.387618052 | 0.698298708    | 0.766604184 |
| Sec22b        | 792.7707123 | 0.638740691 | 0.232228061 | 2.750488847 | 0.005950642    | 0.012725356 |
| Epn1          | 2674.99004  | 0.638598196 | 0.131656934 | 4.850471427 | 1.23E-06       | 4.91E-06    |
| Mast1         | 24.8726419  | 0.638565848 | 0.414567165 | 1.540319403 | 0.123482516    | 0.184790198 |
| Psm1a         | 1626.111396 | 0.638300045 | 0.139514346 | 4.575157054 | 4.76E-06       | 1.76E-05    |
| Mrps18a       | 448.6857193 | 0.638064496 | 0.141362447 | 4.51367751  | 6.37E-06       | 2.32E-05    |
| Morn1         | 36.69133316 | 0.637651145 | 0.359731882 | 1.772573345 | 0.076299432    | 0.12205618  |
| Mcm3ap        | 481.6704895 | 0.637430862 | 0.152695938 | 4.174510915 | 2.99E-05       | 9.80E-05    |
| Dact2         | 172.09103   | 0.637330435 | 0.440627994 | 1.446413855 | 0.148061158    | 0.215426469 |
| Sh3glb2       | 502.3617784 | 0.637260928 | 0.195470052 | 3.260146106 | 0.001113548    | 0.002784361 |
| Gna12         | 1562.796803 | 0.637194226 | 0.155097527 | 4.108345497 | 3.99E-05       | 0.000128328 |
| Ftl1-ps2      | 0.951340774 | 0.636940043 | 2.243698403 | 0.283879528 | 0.776502706 NA |             |
| Uqcc2         | 459.5060066 | 0.63668073  | 0.216925037 | 2.935026485 | 0.003335192    | 0.007540896 |
| Cnot8         | 744.3700992 | 0.636273632 | 0.155449861 | 4.09311161  | 4.26E-05       | 0.000136417 |
| Gm14425       | 1.108184105 | 0.636236601 | 1.573449096 | 0.404357918 | 0.68594954 NA  |             |
| Bri3bp        | 523.1610959 | 0.636023552 | 0.200772674 | 3.167879072 | 0.001535554    | 0.003721655 |
| Gm21156       | 0.658102424 | 0.635948432 | 2.486035195 | 0.255808298 | 0.798098866 NA |             |
| Agfg2         | 600.656135  | 0.635680841 | 0.197790357 | 3.213544126 | 0.001311077    | 0.003233685 |
| Olfr1031      | 2.847938114 | 0.635434081 | 1.299305946 | 0.489056548 | 0.624801663    | 0.70405306  |
| Lrp3          | 361.3408405 | 0.634917876 | 0.237901728 | 2.668824148 | 0.007611729    | 0.015900595 |
| Olfr125       | 0.975547369 | 0.634557726 | 1.769247441 | 0.358659683 | 0.719849693 NA |             |
| Dtdw1         | 122.1393296 | 0.634091731 | 0.211043195 | 3.004558999 | 0.002659662    | 0.006123975 |
| Ppp2r2d       | 524.9678822 | 0.63369452  | 0.129251019 | 4.90282029  | 9.45E-07       | 3.82E-06    |
| Ythdf2        | 410.2328766 | 0.633530365 | 0.199836008 | 3.1702513   | 0.001523072    | 0.003693503 |
| Tmem144       | 113.3960844 | 0.633421164 | 0.321423798 | 1.970672886 | 0.048761304    | 0.082657125 |
| Gm5977        | 0.673427763 | 0.633274233 | 2.211609067 | 0.286340946 | 0.774617 NA    |             |

|               |             |             |             |             |                |             |
|---------------|-------------|-------------|-------------|-------------|----------------|-------------|
| Zfp930        | 121.7311642 | 0.633093874 | 0.295267333 | 2.144137879 | 0.032021841    | 0.05709619  |
| Olfir765      | 0.637086543 | 0.63270018  | 2.811068421 | 0.225074628 | 0.821921218 NA |             |
| Caena2d3      | 2.256468467 | 0.632410404 | 1.36432952  | 0.463532009 | 0.642983076    | 0.719688496 |
| Fndc8         | 2.093077073 | 0.632269326 | 1.724219    | 0.366698967 | 0.713843577    | 0.778854739 |
| Mrpl28        | 550.5884074 | 0.632107892 | 0.192651807 | 3.281089863 | 0.001034068    | 0.002598583 |
| Mcu           | 366.7797277 | 0.632076946 | 0.191986021 | 3.29230713  | 0.00099369     | 0.002507094 |
| Six3          | 1.527155374 | 0.631720177 | 1.571622784 | 0.401954072 | 0.687717827 NA |             |
| 4930453N24Rik | 503.7489824 | 0.631263713 | 0.151867403 | 4.156676804 | 3.23E-05       | 0.000105358 |
| Gm11204       | 0.402854417 | 0.631206842 | 3.176328978 | 0.198722124 | 0.842480116 NA |             |
| Fam169b       | 350.010954  | 0.630996513 | 0.208367107 | 3.028292326 | 0.002459401    | 0.005708354 |
| Klhl9         | 706.2303527 | 0.630650301 | 0.146819225 | 4.295420445 | 1.74E-05       | 5.93E-05    |
| 4833439L19Rik | 849.9403586 | 0.630634448 | 0.191141512 | 3.299306569 | 0.00096924     | 0.002451937 |
| Hyou1         | 2357.622048 | 0.630428978 | 0.278353455 | 2.264850558 | 0.023521852    | 0.043421822 |
| Gcnt4         | 155.2789782 | 0.63020485  | 0.230999967 | 2.728159911 | 0.006368873    | 0.013523046 |
| Pcgf1         | 109.8503711 | 0.630051896 | 0.235764545 | 2.672377627 | 0.007531584    | 0.015750545 |
| Ciao1         | 735.3263824 | 0.629910906 | 0.196547134 | 3.204884721 | 0.001351166    | 0.00332151  |
| Mettl3        | 287.6852911 | 0.629791365 | 0.31247052  | 2.015522505 | 0.04384993     | 0.075259601 |
| Adpgk         | 415.8581883 | 0.629621504 | 0.148365438 | 4.24372086  | 2.20E-05       | 7.36E-05    |
| Zfp759        | 36.43131175 | 0.629437403 | 0.407571129 | 1.544362095 | 0.122500637    | 0.18348289  |
| Gm37568       | 0.661529056 | 0.6292266   | 2.908004772 | 0.21637743  | 0.828693558 NA |             |
| Depdc7        | 511.079368  | 0.62917239  | 0.267554166 | 2.351570147 | 0.018694364    | 0.035391619 |
| Tmem129       | 395.0898157 | 0.62916753  | 0.171466944 | 3.669322588 | 0.000243194    | 0.000687786 |
| Mtcp1         | 84.05497458 | 0.629118589 | 0.333557708 | 1.8860862   | 0.05928334     | 0.097761886 |
| Olfir1505     | 4.02809073  | 0.628810176 | 1.116317761 | 0.563289591 | 0.573237705    | 0.657066926 |
| Kdm4d         | 1.188166747 | 0.628722453 | 1.699373114 | 0.369973167 | 0.711402483 NA |             |
| Prkn          | 55.50845072 | 0.628675166 | 0.366812244 | 1.713888174 | 0.086549265    | 0.136417518 |
| Aagab         | 489.5934556 | 0.628658091 | 0.164332716 | 3.825520003 | 0.000130496    | 0.000386367 |
| Ar116         | 96.73577076 | 0.628564281 | 0.271351481 | 2.316421045 | 0.020535291    | 0.038483636 |
| Diaph2        | 312.5923813 | 0.628508899 | 0.191760098 | 3.277579159 | 0.001047014    | 0.00262763  |
| Ipp           | 142.8723587 | 0.628458908 | 0.221880989 | 2.832414404 | 0.004619793    | 0.010124468 |
| Pde6h         | 19.22694173 | 0.62837971  | 0.49358024  | 1.273105483 | 0.202980614    | 0.280854922 |
| Ppcdc         | 526.0090661 | 0.628344614 | 0.169863917 | 3.699105881 | 0.00021636     | 0.000618359 |
| Rnf125        | 431.7946831 | 0.62819786  | 0.455416583 | 1.379391713 | 0.167774013    | 0.239128114 |
| Papola        | 1920.482553 | 0.628100255 | 0.117241883 | 5.357302691 | 8.45E-08       | 3.91E-07    |
| Zfp592        | 741.6736231 | 0.62808465  | 0.211674512 | 2.967219078 | 0.003005068    | 0.006855398 |
| Pikfyve       | 415.2996503 | 0.627993948 | 0.142135866 | 4.418265175 | 9.95E-06       | 3.52E-05    |
| Gtf2h5        | 630.8046905 | 0.627937361 | 0.217323126 | 2.889418036 | 0.003859556    | 0.008601008 |
| Gm15696       | 5.328937484 | 0.627884551 | 0.821617942 | 0.764205014 | 0.444745079    | 0.535907133 |
| Gm20482       | 9.253511529 | 0.627860337 | 0.747805287 | 0.839604036 | 0.401130436    | 0.494180638 |
| Hpgd          | 1603.127612 | 0.627666196 | 0.210488912 | 2.981944228 | 0.002864242    | 0.006561354 |
| Rhot2         | 852.2244204 | 0.627265311 | 0.162717447 | 3.854935793 | 0.00011576     | 0.000345981 |
| H2aj          | 670.0600832 | 0.627203462 | 0.166917912 | 3.757556361 | 0.000171581    | 0.000499169 |
| Carmil1       | 637.941407  | 0.627079156 | 0.328577905 | 1.908464161 | 0.056331251    | 0.09350878  |
| Bik           | 124.2935288 | 0.627009263 | 0.273325623 | 2.294001038 | 0.021790439    | 0.040577106 |
| Aifm3         | 122.0191926 | 0.626897338 | 0.362100017 | 1.731282268 | 0.083401433    | 0.132041941 |
| Zbtb5         | 175.0917003 | 0.626692195 | 0.199702811 | 3.138124056 | 0.001700329    | 0.004084431 |
| Repin1        | 928.5950949 | 0.62591749  | 0.169998838 | 3.681892758 | 0.000231509    | 0.000657355 |
| Gm11960       | 11.94352358 | 0.625890283 | 0.551919771 | 1.134024031 | 0.256784468    | 0.341711155 |
| Exoc3         | 417.2322887 | 0.62581615  | 0.189020328 | 3.310840461 | 0.000930162    | 0.002361138 |
| Tax1bp1       | 2629.527205 | 0.625751939 | 0.097232712 | 6.435611256 | 1.23E-10       | 7.95E-10    |
| Zfp963        | 78.80468847 | 0.625519012 | 0.292551605 | 2.138149308 | 0.032504627    | 0.057782991 |
| Abhd17b       | 276.9110467 | 0.625488028 | 0.20162349  | 3.102257715 | 0.001920507    | 0.004556193 |
| Il6ra         | 818.7292327 | 0.62543386  | 0.285335219 | 2.191926614 | 0.028384806    | 0.051266466 |
| Slmap         | 841.1009669 | 0.625085365 | 0.163323235 | 3.827289874 | 0.000129562    | 0.000383934 |
| Dmxl2         | 703.5622403 | 0.624818476 | 0.213634272 | 2.924710862 | 0.003447764    | 0.007760428 |
| Af4b1         | 307.6718359 | 0.624626152 | 0.175964081 | 3.549736674 | 0.000385617    | 0.001052007 |
| Zfp593        | 119.1898407 | 0.624615055 | 0.223623971 | 2.793148927 | 0.005219765    | 0.011308497 |
| Gripap1       | 622.4292848 | 0.624560619 | 0.230642335 | 2.707918378 | 0.006770667    | 0.014281902 |
| Zfp938        | 101.0797798 | 0.624485301 | 0.242021576 | 2.580287718 | 0.009871803    | 0.020058939 |
| Ccdc157       | 324.0662091 | 0.624396715 | 0.172358313 | 3.622666666 | 0.000291581    | 0.00081197  |
| Kcnk5         | 513.6037326 | 0.624235411 | 0.365934556 | 1.705866258 | 0.088032983    | 0.138529523 |
| Map2k3        | 1013.361661 | 0.624193702 | 0.213798735 | 2.9195388   | 0.003505498    | 0.007881013 |
| Gabpa         | 662.2833472 | 0.623789401 | 0.190684405 | 3.271318385 | 0.001070473    | 0.002683739 |
| Slc25a38      | 401.4614099 | 0.623350057 | 0.24125833  | 2.583745221 | 0.009773396    | 0.019880308 |
| Gpn3          | 197.0127686 | 0.623130059 | 0.178986931 | 3.481427703 | 0.000498748    | 0.001333396 |
| Ap5z1         | 349.8988237 | 0.623123604 | 0.171880173 | 3.625337307 | 0.000288585    | 0.00080415  |

|               |             |             |             |             |             |             |
|---------------|-------------|-------------|-------------|-------------|-------------|-------------|
| Actg-ps1      | 2.203085263 | 0.623115665 | 1.384463125 | 0.450077473 | 0.652654579 | 0.727932958 |
| Cdkn2aip      | 242.4329102 | 0.623088111 | 0.191857582 | 3.247659558 | 0.001163584 | 0.00289969  |
| Marf1         | 1196.480098 | 0.622495498 | 0.171296739 | 3.634018383 | 0.000279041 | 0.000779979 |
| Fndc3a        | 1148.160948 | 0.622254589 | 0.167522589 | 3.714451832 | 0.000203645 | 0.000584074 |
| Slc49a4       | 679.0612103 | 0.622040971 | 0.168477315 | 3.69213487  | 0.000222379 | 0.000633755 |
| 2810459M11Rik | 1405.190389 | 0.621933003 | 0.17960013  | 3.462876126 | 0.000534434 | 0.001421157 |
| BC021767      | 92.50779976 | 0.621734693 | 0.392314642 | 1.58478585  | 0.113014998 | 0.171504334 |
| Ap3s1         | 713.6869349 | 0.621728663 | 0.218796922 | 2.841578651 | 0.004489078 | 0.009867173 |
| Sem1          | 1217.453918 | 0.621578397 | 0.199024274 | 3.123128568 | 0.001789396 | 0.004275489 |
| Rdx           | 2444.346486 | 0.621156356 | 0.198354619 | 3.131544697 | 0.001738893 | 0.00416533  |
| Dnajc22       | 1431.277341 | 0.621117786 | 0.162759403 | 3.816171451 | 0.000135538 | 0.000400669 |
| Otud3         | 78.03198985 | 0.620987503 | 0.249672424 | 2.487209011 | 0.012874973 | 0.0253866   |
| Tnk2          | 690.4079599 | 0.620700436 | 0.266715955 | 2.327196497 | 0.019954809 | 0.037498853 |
| Glod4         | 602.8390488 | 0.620675983 | 0.13980359  | 4.439628347 | 9.01E-06    | 3.20E-05    |
| Srms          | 15.81277609 | 0.620611623 | 0.581053394 | 1.068080197 | 0.285484338 | 0.373747273 |
| Edc3          | 311.0690286 | 0.620514922 | 0.16152265  | 3.841658864 | 0.000122206 | 0.000363461 |
| Pdcd2l        | 161.681599  | 0.620295837 | 0.25676571  | 2.415804806 | 0.015700475 | 0.030333376 |
| Slc25a5       | 7253.461659 | 0.620234832 | 0.159730268 | 3.883013776 | 0.00010317  | 0.000311299 |
| Dnah12        | 2.172742019 | 0.619697002 | 1.324835848 | 0.467753799 | 0.639960663 | 0.717105915 |
| Gm43215       | 0.949354071 | 0.619577664 | 2.205989074 | 0.28086162  | 0.778816539 | NA          |
| Usp33         | 847.2336721 | 0.619329751 | 0.14141019  | 4.379668459 | 1.19E-05    | 4.14E-05    |
| Trir          | 1306.490853 | 0.619261477 | 0.120928553 | 5.120887169 | 3.04E-07    | 1.31E-06    |
| Smpd2         | 601.3468629 | 0.619026842 | 0.205893875 | 3.006533554 | 0.002642449 | 0.006090923 |
| Gm50253       | 270.5027548 | 0.618842086 | 0.304806371 | 2.030279367 | 0.04232815  | 0.072956254 |
| Gm14584       | 10.77446562 | 0.618759729 | 0.690237882 | 0.896444175 | 0.370015583 | 0.462194142 |
| Gm12057       | 1.585627729 | 0.618644739 | 1.425900255 | 0.433862563 | 0.664388247 | NA          |
| Sec23a        | 949.4768756 | 0.618562288 | 0.173551729 | 3.564137872 | 0.000365054 | 0.001000392 |
| Stimate       | 190.768768  | 0.618543235 | 0.199509994 | 3.10031203  | 0.001933169 | 0.004582406 |
| Ndufa2        | 1446.458481 | 0.618317991 | 0.1415017   | 4.369685964 | 1.24E-05    | 4.32E-05    |
| Lsm1          | 234.3851465 | 0.618238095 | 0.222007142 | 2.784766697 | 0.005356625 | 0.011577046 |
| Olfr1273-ps   | 0.790098674 | 0.617882717 | 2.104167344 | 0.293647137 | 0.769027552 | NA          |
| Nupl2         | 76.87577406 | 0.617760301 | 0.293395866 | 2.105552163 | 0.035243272 | 0.06201128  |
| 2510002D24Rik | 326.051145  | 0.617581311 | 0.222859453 | 2.771169464 | 0.005585535 | 0.01202908  |
| Spc24         | 217.0525005 | 0.617390321 | 0.362887994 | 1.701324737 | 0.088882025 | 0.139693996 |
| L3hypdh       | 433.4699867 | 0.617306278 | 0.319465696 | 1.932308497 | 0.05332144  | 0.089198696 |
| Trim11        | 566.3862671 | 0.617163511 | 0.197855011 | 3.11927157  | 0.001812988 | 0.004323376 |
| Kiz           | 263.0896417 | 0.617029049 | 0.238253727 | 2.5897981   | 0.009603224 | 0.019580882 |
| Lypla1        | 261.5576832 | 0.616957711 | 0.191163147 | 3.227388335 | 0.001249258 | 0.003093297 |
| Nodal         | 6.582427694 | 0.616878452 | 1.027461492 | 0.600390824 | 0.548245802 | 0.633921832 |
| Gm12276       | 9.841753072 | 0.616551391 | 0.767537408 | 0.803285135 | 0.421809948 | 0.513570632 |
| Capn7         | 629.0477591 | 0.61622613  | 0.24415308  | 2.523933471 | 0.011604989 | 0.023204533 |
| Copb1         | 1684.625246 | 0.615976363 | 0.14576549  | 4.225803804 | 2.38E-05    | 7.94E-05    |
| Pgpep1        | 1026.644344 | 0.615969453 | 0.167785619 | 3.671169529 | 0.000241443 | 0.000683287 |
| Olfr1039      | 4.196120245 | 0.615821427 | 1.153766086 | 0.533748941 | 0.593515244 | 0.676206938 |
| Calcr1        | 144.0339396 | 0.615757809 | 0.308561545 | 1.995575338 | 0.045980166 | 0.078536206 |
| Ppox          | 695.3968142 | 0.615377406 | 0.166120621 | 3.70440107  | 0.000211891 | 0.000606296 |
| Spink10       | 3.95030659  | 0.615251773 | 0.955124075 | 0.644159004 | 0.519472332 | 0.608030506 |
| Eif4ebp1      | 749.7327092 | 0.614870559 | 0.210005811 | 2.927874023 | 0.003412883 | 0.007696141 |
| Clock         | 695.2108857 | 0.614648274 | 0.135020579 | 4.552256229 | 5.31E-06    | 1.95E-05    |
| Gm14393       | 1.621831607 | 0.614518951 | 1.535346876 | 0.400247631 | 0.688974135 | NA          |
| Rbbp4         | 1909.914531 | 0.614442641 | 0.216174208 | 2.84234945  | 0.004478238 | 0.009844616 |
| Eif4g1        | 5869.536018 | 0.614189139 | 0.096816786 | 6.343829041 | 2.24E-10    | 1.41E-09    |
| Zfp975        | 99.64831189 | 0.61418227  | 0.291321323 | 2.108264044 | 0.035008156 | 0.06165486  |
| Hbs1l         | 845.997521  | 0.613895616 | 0.145558396 | 4.217521169 | 2.47E-05    | 8.21E-05    |
| Ppp5c         | 813.9356466 | 0.613713278 | 0.144567976 | 4.245153685 | 2.18E-05    | 7.32E-05    |
| Atp2b4        | 167.0066763 | 0.613543988 | 0.421248666 | 1.456488857 | 0.145257528 | 0.211925574 |
| Pdxc1         | 1568.091489 | 0.61208353  | 0.158528797 | 3.861024248 | 0.000112913 | 0.000338361 |
| 1700123O20Rik | 412.4898868 | 0.612047772 | 0.166957749 | 3.665884185 | 0.000246485 | 0.000696632 |
| Gm14418       | 43.98775322 | 0.611916126 | 0.456137591 | 1.341516545 | 0.179752802 | 0.253656631 |
| Gm15186       | 1.47611816  | 0.611821215 | 1.63239972  | 0.374798652 | 0.707810217 | NA          |
| Lrrc41        | 566.160568  | 0.611685162 | 0.158004564 | 3.871313249 | 0.000108251 | 0.00032542  |
| Fbxo21        | 2100.514875 | 0.611683255 | 0.159438625 | 3.83648099  | 0.00012481  | 0.000370883 |
| Tpmt          | 1234.288388 | 0.611669739 | 0.223290865 | 2.739340629 | 0.006156255 | 0.013109148 |
| Slc26a8       | 9.907380072 | 0.611612354 | 1.328064563 | 0.460529082 | 0.645136502 | 0.721393613 |
| Tbx6          | 23.56308573 | 0.611565412 | 0.450839177 | 1.356504587 | 0.174938677 | 0.247909772 |
| Gm45665       | 6.348205898 | 0.611508868 | 0.729814081 | 0.83789678  | 0.402088677 | 0.495146473 |

|               |             |             |             |             |                |             |
|---------------|-------------|-------------|-------------|-------------|----------------|-------------|
| Mettl23       | 215.6660652 | 0.611507685 | 0.263572645 | 2.320072648 | 0.020336948    | 0.038145482 |
| Abca2         | 921.1290699 | 0.611284187 | 0.238700192 | 2.560886868 | 0.010440535    | 0.02109139  |
| Ccdc138       | 81.7008794  | 0.611187291 | 0.27226845  | 2.244796602 | 0.024781193    | 0.045461076 |
| Larp4         | 1022.105564 | 0.611044301 | 0.162376986 | 3.763121349 | 0.000167806    | 0.00048885  |
| Focad         | 180.1876164 | 0.610814119 | 0.245292709 | 2.490143797 | 0.012769142    | 0.025224604 |
| Cpt1a         | 4675.525087 | 0.610671025 | 0.272210129 | 2.243380977 | 0.024872258    | 0.045595185 |
| Cmas          | 727.482618  | 0.610441723 | 0.210451629 | 2.900627218 | 0.003724166    | 0.008327595 |
| Prkaca        | 1064.155581 | 0.610439751 | 0.14162982  | 4.310107514 | 1.63E-05       | 5.58E-05    |
| Olfir843      | 0.793670338 | 0.610393993 | 2.103691065 | 0.290153817 | 0.771698565 NA |             |
| Gfap          | 6.044206008 | 0.610159582 | 0.943598311 | 0.646630642 | 0.517871021    | 0.606489329 |
| B3gat3        | 720.9451748 | 0.609991938 | 0.175539021 | 3.474964897 | 0.00051092     | 0.001362454 |
| 0610012G03Rik | 448.1931012 | 0.609984452 | 0.190837042 | 3.196362958 | 0.001391719    | 0.003411853 |
| Cdk8          | 668.6758695 | 0.60926149  | 0.233741312 | 2.606563149 | 0.009145596    | 0.018726173 |
| Cox17         | 676.6974317 | 0.609218213 | 0.166807236 | 3.652228922 | 0.000259974    | 0.000731359 |
| Atg16l1       | 646.7456714 | 0.608654963 | 0.174954491 | 3.478933065 | 0.000503414    | 0.001344963 |
| Leo1          | 308.4665688 | 0.608591519 | 0.197217457 | 3.085890719 | 0.002029434    | 0.004791938 |
| Mrps18b       | 800.7299969 | 0.608567786 | 0.204875445 | 2.970428128 | 0.00297385     | 0.006789633 |
| Yipf2         | 466.5692384 | 0.608565123 | 0.131683897 | 4.621408832 | 3.81E-06       | 1.43E-05    |
| Ormdl1        | 358.2145085 | 0.608404275 | 0.22826243  | 2.665371931 | 0.007690322    | 0.01604904  |
| Psmd14        | 915.4045662 | 0.608375748 | 0.151721892 | 4.009808602 | 6.08E-05       | 0.000189947 |
| Yaf2          | 337.0649541 | 0.608327288 | 0.214432359 | 2.836919249 | 0.004555113    | 0.009992641 |
| Slc39a8       | 350.1998647 | 0.60826364  | 0.276201059 | 2.202249483 | 0.02764769     | 0.050078392 |
| Ccz1          | 648.8337134 | 0.608233967 | 0.184496592 | 3.296721961 | 0.000978203    | 0.002471677 |
| Hpca          | 5.175685563 | 0.607958396 | 0.854350891 | 0.711602694 | 0.476710838    | 0.567169124 |
| Polr2k        | 251.2615602 | 0.607784316 | 0.183452739 | 3.313029387 | 0.000922913    | 0.002344482 |
| Nfx1          | 1015.365071 | 0.607459231 | 0.17906264  | 3.392439826 | 0.000692731    | 0.001799708 |
| Elp4          | 159.6559212 | 0.607249986 | 0.34045774  | 1.783628084 | 0.074484119    | 0.119443633 |
| Gm48364       | 6.852774163 | 0.606977239 | 0.947723079 | 0.640458434 | 0.521874604    | 0.610388411 |
| Abt1          | 182.9460541 | 0.606540489 | 0.184835064 | 3.281522871 | 0.001032482    | 0.002595362 |
| Olfir1323     | 8.042803741 | 0.606464398 | 0.783210475 | 0.774331316 | 0.438734889    | 0.529962137 |
| Churc1        | 391.8730333 | 0.606358173 | 0.228651555 | 2.651887379 | 0.008004324    | 0.016637332 |
| Pole4         | 351.8874036 | 0.606232645 | 0.18566979  | 3.265111924 | 0.001094208    | 0.00273801  |
| Ugt2b34       | 9217.462228 | 0.605883138 | 0.180959023 | 3.348178657 | 0.000813446    | 0.002086298 |
| Mtrf1l        | 96.33395266 | 0.605394502 | 0.2865416   | 2.112763044 | 0.034621054    | 0.061067108 |
| Dars          | 1224.159916 | 0.605298916 | 0.17444779  | 3.469799845 | 0.000520846    | 0.001386321 |
| Neil2         | 89.89223442 | 0.605158305 | 0.317729599 | 1.904633084 | 0.056827783    | 0.094232083 |
| Elavl3        | 15.95097444 | 0.605044247 | 0.477872513 | 1.266120629 | 0.205469898    | 0.283838491 |
| Gm7204        | 1.620452248 | 0.604573532 | 1.535950295 | 0.393615297 | 0.693865086 NA |             |
| Trmt112       | 569.8618187 | 0.603964202 | 0.128846651 | 4.687465282 | 2.77E-06       | 1.05E-05    |
| Sdhc          | 2436.904963 | 0.603897734 | 0.186901516 | 3.231101316 | 0.001233142    | 0.003057389 |
| Anapc15       | 237.9973629 | 0.603888695 | 0.232411413 | 2.598360755 | 0.009367003    | 0.019145026 |
| Slc13a1       | 2.907142333 | 0.603704267 | 1.150818261 | 0.524586972 | 0.599870345    | 0.681909025 |
| 1110059G10Rik | 192.5104077 | 0.603650938 | 0.269740015 | 2.237899105 | 0.025227635    | 0.046185645 |
| Tom1          | 461.2254451 | 0.603581015 | 0.232248122 | 2.598862848 | 0.009353314    | 0.019123925 |
| Synj2bp       | 961.8038365 | 0.603254849 | 0.172278569 | 3.501624453 | 0.000462431    | 0.001242674 |
| Ube3b         | 1054.116515 | 0.603181222 | 0.145530639 | 4.144702634 | 3.40E-05       | 0.000110763 |
| Fem1a         | 486.6193103 | 0.603123371 | 0.16458938  | 3.664412435 | 0.000247907    | 0.000699722 |
| Eif2a         | 770.731444  | 0.603066984 | 0.168557849 | 3.577804226 | 0.000346493    | 0.000951669 |
| Capn10        | 373.9726693 | 0.602961623 | 0.348775457 | 1.728796021 | 0.083845609    | 0.132671239 |
| Otud6b        | 374.9281141 | 0.602577778 | 0.21766351  | 2.768391341 | 0.005633377    | 0.012116806 |
| Ttc41         | 96.23771164 | 0.602561955 | 0.387408726 | 1.555364953 | 0.119859176    | 0.1802063   |
| Serf2         | 3811.186168 | 0.602386535 | 0.18224116  | 3.305436236 | 0.000948287    | 0.002403925 |
| Art3          | 21.70427268 | 0.602287864 | 0.479605794 | 1.255797722 | 0.209189318    | 0.287949898 |
| Bag1          | 1293.091005 | 0.602274504 | 0.16367576  | 3.6796805   | 0.000233526    | 0.000662422 |
| Gm18294       | 2.894991644 | 0.602124976 | 1.394032997 | 0.431930218 | 0.665792132    | 0.738911806 |
| Ttyh2         | 976.6385732 | 0.602096151 | 0.116074545 | 5.187150659 | 2.14E-07       | 9.44E-07    |
| Slc25a11      | 1047.611858 | 0.601898044 | 0.178394298 | 3.373975791 | 0.000740909    | 0.001914466 |
| Bnip1         | 415.1659156 | 0.601511162 | 0.176597859 | 3.406109351 | 0.000658958    | 0.001719038 |
| Acox3         | 735.6707897 | 0.601507199 | 0.169898521 | 3.540391026 | 0.000399535    | 0.001086326 |
| Gm15074       | 2.388992182 | 0.601208855 | 1.158002711 | 0.519177416 | 0.603637027    | 0.685276955 |
| Riox2         | 232.7337562 | 0.601111875 | 0.187722188 | 3.202135467 | 0.001364128    | 0.003350477 |
| Maip1         | 351.9727523 | 0.601033725 | 0.178754754 | 3.362337005 | 0.000772857    | 0.001990584 |
| Ubp1          | 1336.511582 | 0.600434289 | 0.144291747 | 4.161251778 | 3.17E-05       | 0.000103448 |
| Psmf1         | 564.1951864 | 0.600168807 | 0.145697535 | 4.119279079 | 3.80E-05       | 0.000122736 |
| Psmd1         | 1888.356124 | 0.600059315 | 0.138856208 | 4.321443898 | 1.55E-05       | 5.31E-05    |
| Gm9619        | 0.657989111 | 0.600042166 | 2.142092707 | 0.280119606 | 0.779385743 NA |             |



|               |             |             |             |             |             |             |
|---------------|-------------|-------------|-------------|-------------|-------------|-------------|
| Uqcc1         | 543.2322996 | 0.599826572 | 0.213968096 | 2.803345844 | 0.00505754  | 0.010986369 |
| Agpat2        | 3736.235081 | 0.599579598 | 0.283738698 | 2.113140021 | 0.034588785 | 0.061029767 |
| Rint1         | 316.0445198 | 0.599462992 | 0.174690663 | 3.43156858  | 0.000600101 | 0.001579273 |
| Vmn1r20       | 4.823836011 | 0.599382521 | 0.951316796 | 6.630055648 | 0.528658176 | 0.616581008 |
| Vmn1r6        | 8.346763082 | 0.599286841 | 0.647059026 | 0.926170283 | 0.354357494 | 0.446825928 |
| Ptgr2         | 1009.839555 | 0.598908725 | 0.204299122 | 2.931528632 | 0.003372983 | 0.007620277 |
| Timm21        | 316.4110769 | 0.598789592 | 0.187775209 | 3.188863938 | 0.001428331 | 0.003492067 |
| Dna2          | 258.8272642 | 0.598752743 | 0.181492338 | 3.29905246  | 0.000970118 | 0.00245343  |
| Cluh          | 3823.028062 | 0.59849348  | 0.20415566  | 2.931554674 | 0.0033727   | 0.007620277 |
| Obox8         | 3.200180468 | 0.59835936  | 1.102453107 | 0.542752663 | 0.587300109 | 0.670301417 |
| Hsbp1         | 1262.315803 | 0.598347114 | 0.171540968 | 3.488071222 | 0.000486518 | 0.001303704 |
| Usp47         | 1383.633204 | 0.59831729  | 0.133177753 | 4.492621916 | 7.04E-06    | 2.54E-05    |
| Mtg2          | 317.8889072 | 0.598143674 | 0.211633805 | 2.826314418 | 0.004708702 | 0.010292852 |
| Wdr4          | 391.0284108 | 0.598140122 | 0.178762047 | 3.346012939 | 0.000819826 | 0.002101081 |
| Sik3          | 849.2296846 | 0.597883792 | 0.177777114 | 3.363108891 | 0.0007707   | 0.001985926 |
| Olfr344       | 38.18197327 | 0.59764094  | 0.351021876 | 1.70257463  | 0.088647701 | 0.13937711  |
| Ube3a         | 832.6294034 | 0.597637413 | 0.165283688 | 3.615828156 | 0.000299389 | 0.000831403 |
| Gnas          | 9199.379157 | 0.596562239 | 0.151871454 | 3.928073541 | 8.56E-05    | 0.00026213  |
| Ppwd1         | 141.2193758 | 0.596353792 | 0.187704156 | 3.177094239 | 0.001487587 | 0.003616712 |
| Cltb          | 1014.663107 | 0.596272427 | 0.244649963 | 2.437247153 | 0.01479956  | 0.028752468 |
| Gm21761       | 0.353387516 | 0.596263687 | 3.641950386 | 0.16372098  | 0.869950801 | NA          |
| Rrnad1        | 337.4526523 | 0.596118165 | 0.175776357 | 3.391344403 | 0.000695506 | 0.001805542 |
| Abca12        | 5.31862239  | 0.596075029 | 0.914356131 | 0.651906854 | 0.514461263 | 0.603145081 |
| 2810004N23Rik | 500.5913939 | 0.595863212 | 0.153950758 | 3.870479223 | 0.000108622 | 0.000326363 |
| Cdk20         | 132.629419  | 0.595514333 | 0.287134659 | 2.073989726 | 0.038080265 | 0.066474745 |
| Mamdc2        | 21.75008704 | 0.595386035 | 0.673338796 | 0.884229511 | 0.376572331 | 0.468615449 |
| Homez         | 83.543278   | 0.595102396 | 0.501615679 | 1.186371202 | 0.235475739 | 0.318400254 |
| Rita1         | 69.68426639 | 0.594897513 | 0.256987206 | 2.314891556 | 0.020618868 | 0.038614792 |
| Otud5         | 1143.276154 | 0.594883451 | 0.140063069 | 4.24725416  | 2.16E-05    | 7.25E-05    |
| Pex12         | 201.240434  | 0.594820459 | 0.277667657 | 2.142202898 | 0.032177158 | 0.057290464 |
| Tbc1d17       | 729.3509821 | 0.594820051 | 0.122680384 | 4.848534312 | 1.24E-06    | 4.95E-06    |
| Gm3531        | 1.805176899 | 0.594690478 | 1.341024858 | 0.443459698 | 0.657433264 | 0.732208942 |
| Vps9d1        | 389.9207596 | 0.594613532 | 0.222592026 | 2.671315515 | 0.007555459 | 0.015792725 |
| Slc25a31      | 1.098684725 | 0.594366009 | 1.692308447 | 0.351216121 | 0.725426217 | NA          |
| Prlx2c        | 1243.071943 | 0.594142951 | 0.161393887 | 3.681322529 | 0.000232027 | 0.000658608 |
| Swi5          | 2089.938309 | 0.594041031 | 0.174301578 | 3.408121943 | 0.000654117 | 0.001709024 |
| Shf           | 180.4421744 | 0.593949297 | 0.239487966 | 2.480079928 | 0.013135293 | 0.025838006 |
| Gm2a          | 2053.596276 | 0.593922917 | 0.185113862 | 3.208419457 | 0.001334667 | 0.003287114 |
| Mvb12a        | 854.4761158 | 0.593857062 | 0.112075332 | 5.298731241 | 1.17E-07    | 5.31E-07    |
| Letm2         | 85.90344006 | 0.593025467 | 0.268891135 | 2.205448194 | 0.027422659 | 0.049734202 |
| Cog1          | 408.1670802 | 0.592643334 | 0.202206525 | 2.930881358 | 0.003380018 | 0.007634149 |
| Nrg4          | 79.37184184 | 0.592581057 | 0.633281868 | 0.93573034  | 0.349412045 | 0.441930154 |
| Cckar         | 0.649549653 | 0.592465377 | 2.804040353 | 0.21128989  | 0.832661072 | NA          |
| Araf          | 1402.864077 | 0.592350122 | 0.164886693 | 3.592467719 | 0.000327561 | 0.000904041 |
| H3c7          | 2.869532607 | 0.592213918 | 1.067554216 | 0.554738962 | 0.579073222 | 0.662597509 |
| Gata5         | 2.550350308 | 0.592144601 | 1.183757923 | 0.500224404 | 0.616917077 | 0.69697558  |
| Ninj1         | 2007.499489 | 0.591864288 | 0.207299755 | 2.855113295 | 0.004302148 | 0.009501622 |
| Ctrc          | 5.840499655 | 0.591369085 | 0.737882319 | 0.80144092  | 0.422876434 | 0.514575121 |
| Bbip1         | 237.4867941 | 0.591292635 | 0.214988493 | 2.750345508 | 0.005953246 | 0.012729328 |
| Apmap         | 600.6113573 | 0.590935681 | 0.144222637 | 4.097385092 | 4.18E-05    | 0.0001341   |
| Ppp4r4        | 83.51815795 | 0.590805516 | 0.486054034 | 1.215514068 | 0.224170086 | 0.305512162 |
| Csad          | 5176.347687 | 0.59041726  | 0.277671715 | 2.126314016 | 0.033477122 | 0.059289214 |
| Rnf7          | 477.8677276 | 0.589924663 | 0.198014367 | 2.979201316 | 0.002890008 | 0.006615046 |
| Lrrn3         | 11.06262835 | 0.58979205  | 0.556615116 | 1.059604803 | 0.289324428 | 0.378222747 |
| H3c6          | 5.919616305 | 0.589752604 | 1.313304691 | 0.44906     | 0.653388375 | 0.728417801 |
| Stk16         | 908.3617159 | 0.589751612 | 0.162559349 | 3.627915678 | 0.000285719 | 0.000797076 |
| Hcww1         | 0.73387615  | 0.589595307 | 2.347888417 | 0.25111726  | 0.801723452 | NA          |
| Hsbp1         | 319.8447168 | 0.589587027 | 0.394424966 | 1.49480149  | 0.134966257 | 0.199040204 |
| Hip1r         | 612.6077469 | 0.589165924 | 0.311530354 | 1.891199096 | 0.058597772 | 0.096790506 |
| Rars2         | 215.9856953 | 0.589017553 | 0.258883065 | 2.275226278 | 0.022892359 | 0.042420537 |
| Lymr2         | 145.3286889 | 0.588648087 | 0.247132127 | 2.381916482 | 0.017222803 | 0.032897966 |
| Tsr3          | 311.2125196 | 0.588394013 | 0.177418633 | 3.316416118 | 0.0009118   | 0.002319015 |
| Rnf215        | 296.3556098 | 0.588220662 | 0.186343034 | 3.156654954 | 0.001595901 | 0.003857495 |
| Mcat          | 314.044637  | 0.588182309 | 0.169497972 | 3.470143636 | 0.00052018  | 0.001384981 |
| Nsun4         | 355.7834018 | 0.587754295 | 0.20167517  | 2.914361229 | 0.003564172 | 0.007996053 |
| Ptges3        | 2060.447604 | 0.587733922 | 0.150581814 | 3.903087007 | 9.50E-05    | 0.000288303 |

|               |             |             |             |             |             |              |
|---------------|-------------|-------------|-------------|-------------|-------------|--------------|
| Cnn1          | 5.441856035 | 0.587625378 | 0.939608259 | 0.625394011 | 0.531712492 | 0.619422889  |
| Mospd2        | 555.2777382 | 0.587413993 | 0.234125529 | 2.508970271 | 0.012108367 | 0.024055873  |
| Cidea         | 6.425519828 | 0.587296836 | 1.182747001 | 0.496553224 | 0.619504146 | 0.699146477  |
| Lgals4        | 465.3907666 | 0.587228314 | 0.278875282 | 2.105702266 | 0.035230223 | 0.062000763  |
| Ppm1a         | 1663.746974 | 0.587221197 | 0.148281213 | 3.960186092 | 7.49E-05    | 0.00023096   |
| Gspt1         | 1210.031442 | 0.586684303 | 0.139801555 | 4.196550614 | 2.71E-05    | 8.94E-05     |
| Gm6092        | 0.658868594 | 0.586635596 | 2.409441451 | 0.243473688 | 0.807638466 | NA           |
| Clec16a       | 222.5047942 | 0.586554284 | 0.174159258 | 3.367919058 | 0.000757378 | 0.001954554  |
| Rnf149        | 1128.271583 | 0.58621952  | 0.161143063 | 3.637882444 | 0.000274889 | 0.000769761  |
| Prom2         | 1.805374942 | 0.586129256 | 1.841482679 | 0.318292028 | 0.750263431 | 0.809063886  |
| Rab21         | 785.8738894 | 0.586043954 | 0.136998885 | 4.277727921 | 1.89E-05    | 6.38E-05     |
| Cyp2c69       | 68.65951338 | 0.585811147 | 0.453297176 | 1.292333547 | 0.196241659 | 0.272890821  |
| Atxn7l1       | 296.2031652 | 0.585772485 | 0.164218238 | 3.567036721 | 0.000361041 | 0.000989713  |
| Dennd4c       | 445.3406777 | 0.585723424 | 0.162497684 | 3.60450322  | 0.000312751 | 0.000865547  |
| Naa30         | 410.7758938 | 0.585636213 | 0.208074078 | 2.814556327 | 0.004884462 | 0.010638853  |
| Ulk2          | 1059.530834 | 0.585496225 | 0.192667653 | 3.038892187 | 0.002374498 | 0.005530871  |
| Ag04          | 114.8876099 | 0.584974971 | 0.276508837 | 2.115574232 | 0.034381035 | 0.060697851  |
| Slc35a1       | 322.8363037 | 0.58473666  | 0.185440636 | 3.153228301 | 0.001614755 | 0.00389975   |
| Adgrf2        | 3.054259177 | 0.58423626  | 1.145437711 | 0.510055025 | 0.610012913 | 0.690996687  |
| Dedd          | 478.6641077 | 0.583744326 | 0.183094716 | 3.188209577 | 0.001431567 | 0.003498976  |
| Psmc3         | 2207.755244 | 0.583688319 | 0.167787054 | 3.478744676 | 0.000503768 | 0.001345698  |
| Gm6900        | 0.286972029 | 0.583680534 | 3.638387563 | 0.160422859 | 0.872547984 | NA           |
| Mus81         | 152.8397254 | 0.583549767 | 0.228088024 | 2.558441061 | 0.010514264 | 0.02122273   |
| 3110070M22Rik | 7.331991539 | 0.583196184 | 0.663924999 | 0.878406725 | 0.379723036 | 0.471693262  |
| Yap1          | 1046.658317 | 0.583034605 | 0.148044165 | 3.938247793 | 8.21E-05    | 0.000252122  |
| Xbp1          | 4202.748495 | 0.582900859 | 0.197075147 | 2.95775935  | 0.003098839 | 0.0075052331 |
| Wdr53         | 160.1263735 | 0.582258912 | 0.214958223 | 2.708707326 | 0.00675459  | 0.01426034   |
| Grhl2         | 59.40194976 | 0.581878685 | 0.474312279 | 1.226783937 | 0.21990381  | 0.300635136  |
| Fdxacb1       | 108.0149789 | 0.581848877 | 0.238274108 | 2.441930772 | 0.014608948 | 0.028433993  |
| Gm27029       | 39.86127649 | 0.581764016 | 0.585565979 | 0.993507199 | 0.320462844 | 0.411730391  |
| Zfp871        | 172.8073943 | 0.581656079 | 0.337515608 | 1.723345722 | 0.084826024 | 0.134048393  |
| Slc4a1ap      | 243.6304924 | 0.58158816  | 0.193305263 | 3.00865146  | 0.0026241   | 0.006052754  |
| Tmem214       | 1350.248175 | 0.581487067 | 0.140436808 | 4.140560277 | 3.46E-05    | 0.000112654  |
| 1700094D03Rik | 103.1768142 | 0.581139567 | 0.219853753 | 2.643300651 | 0.00821021  | 0.017011139  |
| Sel1l         | 2316.819844 | 0.580782833 | 0.159497235 | 3.641334814 | 0.000271228 | 0.000760134  |
| Rbm12b1       | 179.4266658 | 0.580621833 | 0.328166622 | 1.769289728 | 0.076845537 | 0.122826056  |
| Coa5          | 1219.491418 | 0.580386213 | 0.196976533 | 2.946473902 | 0.003214195 | 0.007291497  |
| Cep44         | 224.1624937 | 0.580158682 | 0.224594937 | 2.583133397 | 0.009790746 | 0.019913223  |
| Sag           | 6.835137138 | 0.580078426 | 0.774639162 | 0.748836948 | 0.453955487 | 0.544772149  |
| Nr2f2         | 596.9470966 | 0.580010421 | 0.226645222 | 2.559111617 | 0.010494004 | 0.021186853  |
| Vmn1r203      | 76.5068581  | 0.579409492 | 0.510790871 | 1.134337994 | 0.256652798 | 0.341589265  |
| Igbbp1        | 872.2005514 | 0.579379245 | 0.131522053 | 4.405187061 | 1.06E-05    | 3.72E-05     |
| Gm14108       | 0.286905704 | 0.579290675 | 3.63841747  | 0.15921501  | 0.873499478 | NA           |
| Pdia6         | 4830.996261 | 0.579010667 | 0.218711846 | 2.647367661 | 0.00811211  | 0.016834481  |
| Grccl0        | 1133.646039 | 0.579000669 | 0.141234974 | 4.099555883 | 4.14E-05    | 0.000132949  |
| Accp2         | 35.0593045  | 0.578831806 | 0.370961038 | 1.560357415 | 0.118675442 | 0.178710268  |
| Dpag1         | 508.3262087 | 0.578542352 | 0.175579212 | 3.295050391 | 0.00098404  | 0.002484953  |
| Olfr1023      | 3.36624346  | 0.578243216 | 1.493761099 | 0.387105553 | 0.698678067 | 0.76693695   |
| Rbbp6         | 1155.342449 | 0.578218095 | 0.152546352 | 3.790441965 | 0.000150379 | 0.000441555  |
| Atg14         | 323.4075982 | 0.578150287 | 0.191817623 | 3.014062409 | 0.002577748 | 0.005955474  |
| Olfr228       | 1.620474143 | 0.578117685 | 1.505374435 | 0.384035806 | 0.700951909 | NA           |
| Gm29257       | 2.000206325 | 0.577832421 | 1.485432273 | 0.388999507 | 0.697276511 | 0.765777876  |
| Clk2          | 588.6835768 | 0.577684433 | 0.158760368 | 3.638719421 | 0.000273997 | 0.000767516  |
| Phyhd1        | 1477.607007 | 0.577604581 | 0.221988119 | 2.60196169  | 0.009269221 | 0.018965635  |
| Mydgf         | 1027.759286 | 0.577602958 | 0.149358154 | 3.86723418  | 0.000110077 | 0.000330443  |
| Setd4         | 98.62283536 | 0.577484338 | 0.307088206 | 1.880516171 | 0.060037765 | 0.098881636  |
| Ccni          | 2416.918363 | 0.577335388 | 0.139926135 | 4.126001091 | 3.69E-05    | 0.000119568  |
| Gm2829        | 0.287900938 | 0.577244671 | 3.638431414 | 0.158652069 | 0.873943003 | NA           |
| Gm48990       | 2.72186325  | 0.577207242 | 1.354456393 | 0.426154171 | 0.669995509 | 0.742609937  |
| Cfl2          | 1051.5383   | 0.57687348  | 0.205496091 | 2.807223618 | 0.004997054 | 0.010867429  |
| Wbp1l         | 3581.612666 | 0.576784913 | 0.248856571 | 2.317740337 | 0.020463437 | 0.038357414  |
| Pstk          | 202.1277152 | 0.576576184 | 0.270928665 | 2.128147587 | 0.033324849 | 0.059074766  |
| Gtpbp8        | 266.4984929 | 0.57652809  | 0.257250031 | 2.241119612 | 0.025018328 | 0.045846765  |
| Ppa1          | 2771.764356 | 0.57650279  | 0.20103547  | 2.867667034 | 0.004135105 | 0.009157608  |
| Tmem120a      | 730.9293987 | 0.576360918 | 0.20641391  | 2.792258131 | 0.005234158 | 0.011331039  |
| Fam53a        | 423.199344  | 0.576161232 | 0.17328994  | 3.324839475 | 0.000884695 | 0.002257487  |

|             |             |             |             |             |             |    |             |
|-------------|-------------|-------------|-------------|-------------|-------------|----|-------------|
| Gm10819     | 0.373737859 | 0.576158942 | 3.638438815 | 0.158353341 | 0.874178378 | NA |             |
| Nubpl       | 119.5543265 | 0.576090898 | 0.269971267 | 2.133897073 | 0.032851207 |    | 0.058350425 |
| Lamp1       | 10159.8476  | 0.576077146 | 0.161229265 | 3.5730309   | 0.000352873 |    | 0.000968569 |
| Pih1d1      | 557.9671651 | 0.5760765   | 0.144390075 | 3.989723669 | 6.62E-05    |    | 0.000205828 |
| Ssbp1       | 678.8164083 | 0.575901408 | 0.169785598 | 3.391933219 | 0.000694014 |    | 0.001802215 |
| Sult4a1     | 3.106432791 | 0.575879837 | 1.393700603 | 0.413201972 | 0.679458644 |    | 0.750658477 |
| Ceacam19    | 2.19047185  | 0.575860082 | 1.410204387 | 0.408352213 | 0.683015112 |    | 0.753806022 |
| Prdx6       | 7922.875692 | 0.575676406 | 0.202084287 | 2.84869455  | 0.0043899   |    | 0.009666627 |
| Zfp354a     | 120.3258317 | 0.575672947 | 0.381048989 | 1.510758363 | 0.130850027 |    | 0.194010372 |
| Clp1        | 225.5214429 | 0.574907121 | 0.201466589 | 2.853610233 | 0.004322553 |    | 0.009541743 |
| Elp6        | 99.05730816 | 0.574677268 | 0.288692694 | 1.990619364 | 0.04652275  |    | 0.079296124 |
| Gm28551     | 1.922431145 | 0.574275729 | 1.904344463 | 0.301560847 | 0.762986859 |    | 0.819725231 |
| Fam210b     | 1339.2282   | 0.57416072  | 0.226477459 | 2.535178211 | 0.011239013 |    | 0.022549453 |
| Gm28136     | 0.030698331 | 0.573991997 | 3.640661043 | 0.157661477 | 0.874723558 | NA |             |
| Gm29617     | 0.030698331 | 0.573991997 | 3.640661043 | 0.157661477 | 0.874723558 | NA |             |
| Gm5859      | 45.03648727 | 0.57397436  | 0.376807259 | 1.523257172 | 0.127694378 |    | 0.190009056 |
| Ubxn8       | 417.4027928 | 0.573883748 | 0.144299794 | 3.977024036 | 6.98E-05    |    | 0.000216224 |
| Gosr1       | 679.127206  | 0.573837329 | 0.132541603 | 4.329488358 | 1.49E-05    |    | 5.13E-05    |
| Ccdc22      | 267.7516374 | 0.573790382 | 0.151159739 | 3.795920701 | 0.000147097 |    | 0.000432735 |
| Dcun1d1     | 670.1538513 | 0.573717415 | 0.268307782 | 2.138280931 | 0.032493949 |    | 0.057770033 |
| Psmid7      | 1019.450996 | 0.573697779 | 0.14102841  | 4.067958923 | 4.74E-05    |    | 0.000150789 |
| Med7        | 254.772769  | 0.57369272  | 0.160313779 | 3.578561511 | 0.000345491 |    | 0.000949069 |
| Exoc7       | 526.8275725 | 0.573618751 | 0.153606664 | 3.734335067 | 0.000188212 |    | 0.000543468 |
| Foxa2       | 725.1914986 | 0.573474244 | 0.28229828  | 2.03144789  | 0.042209581 |    | 0.072759245 |
| Zfp108      | 32.89397604 | 0.573418857 | 0.421762674 | 1.359577062 | 0.173963801 |    | 0.246712826 |
| Cd82        | 1278.423355 | 0.573294994 | 0.130377974 | 4.397176753 | 1.10E-05    |    | 3.84E-05    |
| Sgta        | 1054.228424 | 0.573045892 | 0.125136297 | 4.579373913 | 4.66E-06    |    | 1.73E-05    |
| Gm14443     | 79.19803138 | 0.572931955 | 0.446282411 | 1.283787891 | 0.199216182 |    | 0.276319052 |
| Gm49599     | 15.50604676 | 0.572884279 | 0.59312778  | 0.965869916 | 0.334109278 |    | 0.42621774  |
| Fam173a     | 558.7671902 | 0.572791653 | 0.169426979 | 3.380758226 | 0.000722861 |    | 0.001871426 |
| Gm5244      | 0.286815433 | 0.572782678 | 3.638461835 | 0.157424402 | 0.874910383 | NA |             |
| Ces2g       | 738.1054802 | 0.572691006 | 0.26729701  | 2.142526792 | 0.032151115 |    | 0.057262036 |
| Sfmbt1      | 426.394044  | 0.572629261 | 0.179788578 | 3.185014684 | 0.001447467 |    | 0.003531255 |
| Olfr13      | 0.813864028 | 0.572266729 | 2.102461443 | 0.272188929 | 0.785476754 | NA |             |
| Rabgap1l    | 465.5579658 | 0.572264883 | 0.182074734 | 3.143021939 | 0.001672133 |    | 0.004021234 |
| Agtr1a      | 1084.86027  | 0.571947656 | 0.167727036 | 3.409990847 | 0.000649651 |    | 0.001699178 |
| Ifi35       | 628.0246065 | 0.571888898 | 0.168316168 | 3.397706268 | 0.000679533 |    | 0.001767575 |
| Gtf2a1      | 501.5496795 | 0.571859593 | 0.161913383 | 3.531885887 | 0.000412607 |    | 0.001119193 |
| Cops3       | 700.5472387 | 0.571838583 | 0.130449982 | 4.383584973 | 1.17E-05    |    | 4.08E-05    |
| Safb        | 1494.997829 | 0.571752051 | 0.219819795 | 2.601003479 | 0.009295151 |    | 0.019014127 |
| Tatdn1      | 192.3377937 | 0.571583811 | 0.215192648 | 2.656149344 | 0.00790386  |    | 0.016448365 |
| Gm45871     | 124.956011  | 0.571353055 | 0.239097786 | 2.389620851 | 0.016865774 |    | 0.032291972 |
| Gm15009     | 8.302069382 | 0.571312572 | 0.603246938 | 0.947062532 | 0.343606916 |    | 0.43594632  |
| Ogdh        | 2712.860921 | 0.571183812 | 0.157196814 | 3.633558458 | 0.000279539 |    | 0.000781243 |
| Cln5        | 435.1687819 | 0.571109278 | 0.163046228 | 3.502744502 | 0.000460491 |    | 0.001237851 |
| Rcc1l       | 321.6047662 | 0.570813922 | 0.270309866 | 2.111702136 | 0.034712006 |    | 0.061196512 |
| Eif3j2      | 455.2947788 | 0.570737094 | 0.220597742 | 2.587229996 | 0.009675099 |    | 0.019701515 |
| Tasp1       | 109.4889636 | 0.570451462 | 0.234157462 | 2.436187409 | 0.014842992 |    | 0.028822217 |
| Gm6061      | 25.20390273 | 0.570351237 | 0.390124459 | 1.461972518 | 0.143748741 |    | 0.209993876 |
| Olfr509     | 7.988145854 | 0.570033597 | 0.654097233 | 0.871481438 | 0.383491337 |    | 0.475644069 |
| Poll        | 152.5436469 | 0.570020215 | 0.188356721 | 3.0262802   | 0.002475828 |    | 0.005741791 |
| Dcun1d4     | 521.1268384 | 0.569755222 | 0.242586984 | 2.348663616 | 0.018840919 |    | 0.035645322 |
| Lztf1l      | 251.6290721 | 0.569170469 | 0.2288368   | 2.487233129 | 0.0128741   |    | 0.0253866   |
| LT629148.13 | 4.896290095 | 0.569164913 | 0.985689902 | 0.577427964 | 0.563650388 |    | 0.648213156 |
| lp6k2       | 1327.36426  | 0.56868019  | 0.196651279 | 2.891820453 | 0.003830168 |    | 0.008541099 |
| Sdhaf2      | 440.9351295 | 0.568557111 | 0.122289973 | 4.649253706 | 3.33E-06    |    | 1.25E-05    |
| Sec61g      | 159.895547  | 0.568338518 | 0.295136185 | 1.925682271 | 0.054144059 |    | 0.090362009 |
| Gm11578     | 1.165154336 | 0.567972864 | 1.889714278 | 0.30056018  | 0.7637499   | NA |             |
| Olfr1120    | 15.6787881  | 0.567784522 | 0.483180742 | 1.175097583 | 0.239955678 |    | 0.323380584 |
| Osr2        | 0.695701327 | 0.567672617 | 2.363173576 | 0.240216217 | 0.810162642 | NA |             |
| Grin2a      | 1.934122213 | 0.56748231  | 1.720057027 | 0.329920637 | 0.74145993  |    | 0.802242845 |
| Invs        | 174.7466871 | 0.567212538 | 0.227099886 | 2.497634621 | 0.012502498 |    | 0.024769621 |
| Gm6034      | 0.286744492 | 0.567102674 | 3.638500581 | 0.155861642 | 0.876142081 | NA |             |
| Tmem160     | 345.9066459 | 0.567041919 | 0.206251636 | 2.749272351 | 0.005972774 |    | 0.012764679 |
| Olfr152     | 20.30086484 | 0.566845718 | 0.558934373 | 1.014154335 | 0.310509114 |    | 0.401361694 |
| Lrrc34      | 0.372868683 | 0.566436397 | 3.638505128 | 0.155678329 | 0.87628658  | NA |             |



|            |              |             |             |             |                |             |
|------------|--------------|-------------|-------------|-------------|----------------|-------------|
| Dcbld2     | 136.7520181  | 0.566343379 | 0.236795748 | 2.391695728 | 0.016770739    | 0.032128055 |
| Map3k7     | 670.1995905  | 0.566252754 | 0.162232948 | 3.490368398 | 0.000482355    | 0.001292954 |
| Cited2     | 531.2806669  | 0.566205459 | 0.232237508 | 2.438044841 | 0.014766942    | 0.028698909 |
| Ccdc144b   | 25.33574805  | 0.566093053 | 0.375413911 | 1.507917094 | 0.131575747    | 0.194883001 |
| Uty        | 294.6255284  | 0.565914116 | 0.159696686 | 3.543681022 | 0.000394582    | 0.001073717 |
| Wdr45b     | 555.9369705  | 0.565604563 | 0.17961362  | 3.149007086 | 0.001638262    | 0.003952044 |
| Zfp869     | 196.5008998  | 0.565248989 | 0.162213934 | 3.484589613 | 0.000492892    | 0.001319747 |
| Lamtor1    | 807.2886974  | 0.56520396  | 0.174702994 | 3.235227669 | 0.001215458    | 0.003016488 |
| Tmem39b    | 57.86648132  | 0.565063833 | 0.288389945 | 1.959374253 | 0.050068974    | 0.084479698 |
| Ahsa1      | 1409.955536  | 0.565045948 | 0.149107005 | 3.789533221 | 0.000150931    | 0.000442945 |
| Carnmt1    | 247.28751    | 0.564891663 | 0.18367977  | 3.075415781 | 0.002102093    | 0.004950474 |
| Olfr527    | 0.287732315  | 0.564888511 | 3.638515692 | 0.15525246  | 0.876622293 NA |             |
| Wdr59      | 218.0768226  | 0.564561291 | 0.14898248  | 3.789447541 | 0.000150983    | 0.000443021 |
| Spry3      | 0.287727973  | 0.564532697 | 3.63851812  | 0.155154565 | 0.876699466 NA |             |
| Gm6361     | 30.10601012  | 0.564260985 | 0.830752554 | 0.679216672 | 0.497000585    | 0.58680805  |
| Tmed2      | 3852.974574  | 0.564066653 | 0.135730335 | 4.155788228 | 3.24E-05       | 0.000105748 |
| Mkrn2os    | 285.6443086  | 0.56391995  | 0.215567259 | 2.615981448 | 0.008897139    | 0.018274509 |
| Cfap20     | 581.8668164  | 0.563906446 | 0.194049016 | 2.906000021 | 0.003660814    | 0.008198839 |
| Gm20449    | 7.166698829  | 0.563782533 | 0.700013369 | 0.805388237 | 0.420595678    | 0.512494826 |
| Sumf2      | 191.4415616  | 0.563596786 | 0.175700652 | 3.20771027  | 0.001337962    | 0.003293802 |
| Trmt10b    | 65.41480394  | 0.563470908 | 0.25466096  | 2.212631683 | 0.026923049    | 0.048926995 |
| Gm20388    | 420.3220738  | 0.563452591 | 0.251249156 | 2.242604912 | 0.024922303    | 0.045680618 |
| Zfp964     | 42.62487851  | 0.562951251 | 0.309687902 | 1.817801881 | 0.069094419    | 0.111916547 |
| Mtm1       | 202.4292938  | 0.562911515 | 0.226504544 | 2.485210694 | 0.012947478    | 0.025517758 |
| Snx29      | 43.74256211  | 0.562887651 | 0.348603413 | 1.614693457 | 0.106377095    | 0.16261807  |
| Tram1      | 2705.769238  | 0.562605817 | 0.177287822 | 3.173403633 | 0.001506629    | 0.003657764 |
| Odf2l      | 204.2733162  | 0.562557499 | 0.272576579 | 2.063851201 | 0.039031827    | 0.067934107 |
| Adam7      | 0.672920245  | 0.562430861 | 2.867138624 | 0.196164516 | 0.8444814 NA   |             |
| Gm8399     | 3.430526018  | 0.562313106 | 1.169608285 | 0.480770454 | 0.630679652    | 0.709167546 |
| Rsph3b     | 387.2824689  | 0.561794633 | 0.173103047 | 3.245434691 | 0.001172715    | 0.002920309 |
| Foxn3      | 1197.6111732 | 0.561369647 | 0.206866342 | 2.71368286  | 0.006653983    | 0.014072337 |
| Serpina7   | 534.1961501  | 0.561029    | 0.269756257 | 2.079762696 | 0.037547304    | 0.06562502  |
| Ufsp1      | 49.46889257  | 0.561023479 | 0.431699845 | 1.299568405 | 0.193748934    | 0.269921699 |
| Ly96       | 73.47011858  | 0.560974488 | 0.314635242 | 1.782935961 | 0.074596728    | 0.119612828 |
| Fam185a    | 123.3653514  | 0.560948486 | 0.214650332 | 2.613312924 | 0.008966916    | 0.018402309 |
| Sdf4       | 1673.988992  | 0.560772847 | 0.155650966 | 3.602758547 | 0.000314858    | 0.000870955 |
| Slc8a3     | 2.829705955  | 0.560746632 | 1.298941028 | 0.43169522  | 0.665962942    | 0.739053264 |
| Lrba       | 474.2796462  | 0.560735125 | 0.141472406 | 3.963565342 | 7.38E-05       | 0.000228085 |
| Lsm10      | 173.2842739  | 0.560724672 | 0.179840773 | 3.117895147 | 0.001821476    | 0.004342036 |
| Gm6981     | 6.013241782  | 0.560517153 | 0.774001922 | 0.72418057  | 0.468954886    | 0.559481934 |
| Shroom1    | 769.0120499  | 0.559442719 | 0.2560691   | 2.184733414 | 0.028908399    | 0.052068714 |
| Osgin1     | 8143.085877  | 0.559379062 | 0.262614633 | 2.130037677 | 0.033168503    | 0.058834319 |
| Cfap97d2   | 6.502735735  | 0.558785578 | 0.814095382 | 0.686388341 | 0.492468255    | 0.582380605 |
| Comm4      | 412.1454588  | 0.558698746 | 0.170871385 | 3.269703391 | 0.001076603    | 0.002697748 |
| AU018091   | 2.893833074  | 0.558399297 | 1.130935733 | 0.493749805 | 0.621482887    | 0.700730175 |
| AA413626   | 5.825877439  | 0.558186979 | 0.782469471 | 0.713365824 | 0.475619415    | 0.566463587 |
| Gm8502     | 9.18561835   | 0.558185726 | 0.679738102 | 0.821177634 | 0.411545094    | 0.503698813 |
| lqcb1      | 132.6952603  | 0.55811617  | 0.339644788 | 1.643234901 | 0.100334341    | 0.154810377 |
| Gm49181    | 2.169323751  | 0.558089843 | 1.20798168  | 0.46200191  | 0.644079951    | 0.720537765 |
| Trappc5    | 460.1469238  | 0.557810655 | 0.168321613 | 3.313957396 | 0.000919855    | 0.00233776  |
| Vmn1r39    | 0.819052931  | 0.557703312 | 2.39069043  | 0.233281275 | 0.815542998 NA |             |
| CT010495.1 | 1.494422973  | 0.55764781  | 1.764344309 | 0.316065185 | 0.751953031 NA |             |
| Trim67     | 6.482202267  | 0.557607557 | 0.710996425 | 0.784262111 | 0.432886327    | 0.524285742 |
| Olfr351    | 3.021019915  | 0.557496594 | 1.080604453 | 0.515911805 | 0.605916008    | 0.687360668 |
| Uba1       | 2734.270921  | 0.557386386 | 0.148653546 | 3.749566703 | 0.00017714     | 0.000513587 |
| Vps41      | 851.7847335  | 0.557360817 | 0.225459914 | 2.472106047 | 0.013431967    | 0.026365937 |
| Gm3867     | 1.665645604  | 0.557149214 | 1.51153555  | 0.368598154 | 0.712427272    | 0.777757436 |
| ltfg2      | 290.1296366  | 0.557121578 | 0.279815043 | 1.991035124 | 0.046477026    | 0.079249884 |
| Gm19843    | 0.996568393  | 0.557051476 | 2.687592236 | 0.207267854 | 0.835800678 NA |             |
| Ercc5      | 409.8441101  | 0.556906683 | 0.169707223 | 3.281573252 | 0.001032297    | 0.002595281 |
| Slc7a14    | 6.15779766   | 0.556833062 | 0.746876094 | 0.74554945  | 0.455939629    | 0.546806809 |
| Tmem219    | 517.5332422  | 0.556337041 | 0.146045814 | 3.809332332 | 0.000139343    | 0.000411415 |
| Dpy1913    | 247.2932938  | 0.556151179 | 0.48471424  | 1.147379492 | 0.251224813    | 0.335727884 |
| Sspl2b     | 335.8413989  | 0.555657242 | 0.159777321 | 3.477697828 | 0.00050574     | 0.001350118 |
| Eif3b      | 1995.824894  | 0.555439618 | 0.168128336 | 3.303664508 | 0.0009543      | 0.002417641 |
| Tor1aip2   | 2511.025419  | 0.555209399 | 0.164143606 | 3.382461324 | 0.000718394    | 0.001860991 |

|               |             |             |             |             |                |             |
|---------------|-------------|-------------|-------------|-------------|----------------|-------------|
| Rab2a         | 1898.473681 | 0.554611692 | 0.135077635 | 4.105873578 | 4.03E-05       | 0.000129513 |
| Olfr742       | 1.14906451  | 0.554583478 | 1.889559492 | 0.293498819 | 0.769140902 NA |             |
| Sdhaf1        | 237.1758005 | 0.554225875 | 0.254244715 | 2.179891425 | 0.029265511    | 0.052611877 |
| Brpf3         | 846.2846208 | 0.553813651 | 0.247972393 | 2.233368177 | 0.025524675    | 0.046634301 |
| Klra14-ps     | 0.369177567 | 0.553738655 | 3.637552571 | 0.152228358 | 0.879006828 NA |             |
| Bhlhe40       | 2203.176614 | 0.553698414 | 0.245401617 | 2.25629489  | 0.024052169    | 0.044283082 |
| Azin1         | 1072.126466 | 0.553535881 | 0.237538129 | 2.330303278 | 0.019790128    | 0.037238642 |
| Olfr1202      | 2.310635684 | 0.553489052 | 1.454425896 | 0.380555003 | 0.703533475    | 0.770450097 |
| Ybx1          | 3309.505012 | 0.55345919  | 0.18545195  | 2.984380536 | 0.002841531    | 0.006511954 |
| Gm7336        | 129.522108  | 0.55343217  | 0.356562604 | 1.552131838 | 0.120630681    | 0.181126639 |
| AC117188.2    | 3.321560862 | 0.553122678 | 1.11592297  | 0.495663852 | 0.620131595    | 0.699623018 |
| Safb2         | 1598.456689 | 0.553058614 | 0.216004699 | 2.560400849 | 0.010455149    | 0.021115909 |
| Gm7432        | 1.325909318 | 0.552795097 | 2.098381499 | 0.263438797 | 0.792212391 NA |             |
| Eloc          | 780.024368  | 0.552398517 | 0.232864042 | 2.372193289 | 0.017682837    | 0.033704943 |
| Srsf1         | 2370.652545 | 0.552201689 | 0.157379572 | 3.508725318 | 0.00045026     | 0.001212259 |
| Camta1        | 102.9835639 | 0.552029616 | 0.221342421 | 2.494007315 | 0.012630994    | 0.024983547 |
| Dbr1          | 177.5451481 | 0.551910007 | 0.182620423 | 3.022170239 | 0.002509694    | 0.005813214 |
| Cfap298       | 272.098352  | 0.551758827 | 0.201008309 | 2.744955325 | 0.006051914    | 0.012920854 |
| Slc28a1       | 3.473503822 | 0.551539884 | 0.95722484  | 0.576186347 | 0.564489232    | 0.648958961 |
| Nufip1        | 270.3114636 | 0.551366811 | 0.202043706 | 2.728948217 | 0.006353668    | 0.013497487 |
| Ciao2a        | 675.0415344 | 0.551358764 | 0.193336828 | 2.85180413  | 0.004347188    | 0.009584953 |
| Cenpv         | 358.3959491 | 0.551289969 | 0.189419925 | 2.910411711 | 0.003609529    | 0.008092485 |
| Pds2          | 203.1197174 | 0.551092133 | 0.198946295 | 2.770054765 | 0.005604687    | 0.012067277 |
| Rpf2          | 193.0911617 | 0.550999854 | 0.221782474 | 2.484415669 | 0.012976424    | 0.02557185  |
| Cetn2         | 252.0637974 | 0.550725055 | 0.21294416  | 2.586241645 | 0.009702888    | 0.019753384 |
| Tigar         | 205.2548676 | 0.550683525 | 0.189783519 | 2.901640394 | 0.003712144    | 0.00830289  |
| Emc6          | 1117.242147 | 0.550587818 | 0.16845582  | 3.26844047  | 0.001081419    | 0.002708394 |
| Asrgl1        | 242.4619027 | 0.550559698 | 0.306827673 | 1.794361286 | 0.072755522    | 0.117057016 |
| Dhx36         | 720.5485401 | 0.550540164 | 0.164764096 | 3.341384298 | 0.000833618    | 0.002135464 |
| Dhrs7         | 419.1784818 | 0.5501076   | 0.270170742 | 2.036147942 | 0.041735502    | 0.072015364 |
| Eepd1         | 424.9726638 | 0.549982793 | 0.20165405  | 2.727358036 | 0.006384372    | 0.013549207 |
| 2010003K11Rik | 167.1763649 | 0.549926545 | 0.351267867 | 1.565547541 | 0.117454579    | 0.17715347  |
| Rdh5          | 323.1164959 | 0.549885125 | 0.245419758 | 2.240590281 | 0.025052627    | 0.045894819 |
| Efcc1         | 5.007535784 | 0.549710574 | 0.821016379 | 0.669548852 | 0.503145429    | 0.592540983 |
| Gnai3         | 1269.303319 | 0.549650086 | 0.191816828 | 2.865494603 | 0.004163584    | 0.009215889 |
| Rnf144b       | 844.8028148 | 0.549493054 | 0.288577426 | 1.904144274 | 0.056891397    | 0.094328393 |
| Fcho2         | 749.5924606 | 0.548956308 | 0.141032356 | 3.892413943 | 9.93E-05       | 0.00030038  |
| Fpgt          | 228.7115181 | 0.548948933 | 0.207342536 | 2.647546155 | 0.008107829    | 0.016829693 |
| Hspe1         | 2253.331256 | 0.548927357 | 0.238521204 | 2.301377604 | 0.021370297    | 0.039873133 |
| Serpinb1b     | 1.013846405 | 0.548839295 | 1.975799414 | 0.277780878 | 0.781180571 NA |             |
| Setd2         | 872.1028893 | 0.54830731  | 0.20580374  | 2.664224229 | 0.007716611    | 0.016094052 |
| Mief1         | 471.0560261 | 0.548296751 | 0.192535008 | 2.847776919 | 0.004402577    | 0.009692037 |
| Nudt22        | 192.1996228 | 0.548079537 | 0.222117437 | 2.467521432 | 0.013605208    | 0.026666082 |
| Dlx1          | 2.190051496 | 0.548004202 | 1.512180684 | 0.362393336 | 0.717058119    | 0.781561717 |
| Ccdc187       | 4.085583818 | 0.547920374 | 0.8578075   | 0.638745143 | 0.52298874     | 0.611265052 |
| Ap4s1         | 172.3333223 | 0.547834964 | 0.268886693 | 2.037419394 | 0.041608032    | 0.071838539 |
| Gm13408       | 1.451615645 | 0.547516169 | 1.574536807 | 0.347731578 | 0.728041779 NA |             |
| Pskh1         | 518.2566706 | 0.547185697 | 0.148472156 | 3.685443183 | 0.000228305    | 0.000649032 |
| Wdr20         | 318.8669169 | 0.546518157 | 0.220187964 | 2.482052816 | 0.013062791    | 0.025715296 |
| Gpat4         | 1849.31537  | 0.546435998 | 0.200461524 | 2.725889674 | 0.006412843    | 0.013604548 |
| Bach1         | 810.2166284 | 0.546386493 | 0.165441242 | 3.302601498 | 0.000957924    | 0.00242547  |
| Rsf1          | 403.7750568 | 0.546368987 | 0.242805786 | 2.250230502 | 0.024434317    | 0.044906882 |
| Cept1         | 1009.600845 | 0.546292792 | 0.164338217 | 3.324198124 | 0.000886732    | 0.002262347 |
| Zzef1         | 713.9979814 | 0.545603599 | 0.116159506 | 4.697020668 | 2.64E-06       | 1.01E-05    |
| Abhd17a       | 905.1996806 | 0.545547387 | 0.124888174 | 4.368287003 | 1.25E-05       | 4.35E-05    |
| Mfsd14a       | 608.3733751 | 0.545498018 | 0.189357667 | 2.880781252 | 0.003966909    | 0.008813744 |
| Eno1          | 7716.613221 | 0.545349717 | 0.12390096  | 4.401497106 | 1.08E-05       | 3.77E-05    |
| Mrrf          | 379.7341066 | 0.544957747 | 0.245183345 | 2.222654018 | 0.026239139    | 0.047806438 |
| Pm20d2        | 12.77619374 | 0.54487959  | 0.610006793 | 0.893235284 | 0.371731187    | 0.463929229 |
| Tk2           | 433.2290896 | 0.544602518 | 0.186433217 | 2.921166766 | 0.003487231    | 0.007842015 |
| Rcbtb1        | 1010.566166 | 0.544216137 | 0.180024386 | 3.023013431 | 0.002502711    | 0.005798617 |
| 1700102P08Rik | 3.560745786 | 0.544139055 | 1.140440372 | 0.477130649 | 0.633269091    | 0.711478283 |
| Aldh16a1      | 1282.706577 | 0.544042321 | 0.170414779 | 3.192459737 | 0.001410666    | 0.003453337 |
| Gm10177       | 888.3978728 | 0.543945133 | 0.215413703 | 2.525118535 | 0.011565927    | 0.023142714 |
| Mettl6        | 322.8267284 | 0.543360615 | 0.201808944 | 2.692450613 | 0.007092904    | 0.014915484 |
| Ahr           | 715.2480827 | 0.543300387 | 0.17761253  | 3.058907991 | 0.002221454    | 0.00520783  |

|          |             |             |             |             |             |             |
|----------|-------------|-------------|-------------|-------------|-------------|-------------|
| Zfp617   | 311.0329938 | 0.543070952 | 0.140277471 | 3.87140534  | 0.00010821  | 0.000325354 |
| Zfp459   | 8.087611611 | 0.542983811 | 0.936817006 | 0.57960499  | 0.562181027 | 0.646828788 |
| Il9r     | 2.902593143 | 0.54272506  | 1.114824495 | 0.486825561 | 0.626381955 | 0.705367565 |
| Pmpca    | 1342.500942 | 0.542366833 | 0.161617746 | 3.355861872 | 0.000791181 | 0.002032557 |
| Snip1    | 202.7636186 | 0.54219713  | 0.191625114 | 2.829468001 | 0.004662546 | 0.010206354 |
| Dnajb9   | 828.3437606 | 0.541925219 | 0.27221616  | 1.990790039 | 0.046503975 | 0.079277731 |
| Mxi1     | 321.9891339 | 0.541638742 | 0.189981384 | 2.851009563 | 0.004358066 | 0.009603783 |
| Gypa     | 0.996485351 | 0.541602772 | 2.253168797 | 0.240373812 | 0.810040478 | NA          |
| Stim2    | 346.5898616 | 0.541433405 | 0.229452032 | 2.359680145 | 0.018290698 | 0.034719944 |
| Emc4     | 767.3208181 | 0.541359305 | 0.169025739 | 3.2028217   | 0.001360882 | 0.003343467 |
| Gm7985   | 0.684102258 | 0.541289454 | 2.862263834 | 0.189112355 | 0.850004758 | NA          |
| Kcmf1    | 1055.055085 | 0.540608017 | 0.124813672 | 4.331320505 | 1.48E-05    | 5.09E-05    |
| Sars2    | 208.4197291 | 0.540379154 | 0.197064474 | 2.742143944 | 0.006103959 | 0.013015467 |
| Vdac3    | 1479.814453 | 0.540264085 | 0.139269347 | 3.879274927 | 0.000104768 | 0.000315731 |
| Obox3    | 3.640451979 | 0.539920386 | 1.027910609 | 0.525260058 | 0.59940242  | 0.681604353 |
| Ahsa2    | 645.3103527 | 0.539796166 | 0.190105582 | 2.839454583 | 0.004519073 | 0.009924147 |
| Tmem186  | 302.7811415 | 0.539720329 | 0.178760875 | 3.019230741 | 0.002534174 | 0.005864342 |
| Vmn1r217 | 11.2439242  | 0.539666675 | 0.643701375 | 0.838380492 | 0.401817042 | 0.494954981 |
| Casp6    | 430.8621753 | 0.539633493 | 0.256348256 | 2.105079634 | 0.035284377 | 0.062060697 |
| Prokr1   | 1.163079279 | 0.539613945 | 2.246122346 | 0.240242454 | 0.810142304 | NA          |
| Cyth1    | 598.8494844 | 0.539403206 | 0.198607737 | 2.715922427 | 0.00660914  | 0.013993122 |
| Zfp942   | 265.6413636 | 0.539357028 | 0.172093549 | 3.134092072 | 0.001723868 | 0.004133984 |
| Vkorc111 | 722.0197339 | 0.539355847 | 0.140270948 | 3.845100185 | 0.000120503 | 0.000358836 |
| Olfr1348 | 0.977683683 | 0.539341891 | 2.527404476 | 0.213397537 | 0.831016901 | NA          |
| Sic8b1   | 1175.047178 | 0.538753683 | 0.256044749 | 2.10413877  | 0.035366344 | 0.06216932  |
| Nae1     | 472.8792912 | 0.538423078 | 0.228120744 | 2.360254792 | 0.018262387 | 0.034677787 |
| Foxr1    | 2.679939258 | 0.53827169  | 1.119277448 | 0.480909976 | 0.630580482 | 0.709111878 |
| Rhox4d   | 3.22010828  | 0.538178257 | 1.628000351 | 0.330576254 | 0.740964585 | 0.801927644 |
| Cmc4     | 95.74943558 | 0.53804123  | 0.317916014 | 1.692400529 | 0.090569632 | 0.142032111 |
| Tmem72   | 349.8419556 | 0.537930105 | 0.209895711 | 2.562844671 | 0.010381848 | 0.0210027   |
| AU041133 | 61.86376639 | 0.537770675 | 0.277902328 | 1.935106764 | 0.052977196 | 0.088692451 |
| Sox15    | 1.185355927 | 0.537614369 | 1.935411104 | 0.277777867 | 0.781182882 | NA          |
| Stat2    | 1707.150211 | 0.537098645 | 0.210472079 | 2.551875984 | 0.010714465 | 0.021585937 |
| Pabpn1   | 2059.114487 | 0.53697242  | 0.212616117 | 2.525548989 | 0.011551767 | 0.023125696 |
| Prps1l3  | 255.1218155 | 0.536967775 | 0.21481667  | 2.499655982 | 0.012431396 | 0.024648806 |
| Gpr89    | 415.1258455 | 0.536641083 | 0.299194826 | 1.793617525 | 0.072874237 | 0.117214831 |
| Mcm9     | 127.1971004 | 0.536481857 | 0.213715009 | 2.510267579 | 0.012063971 | 0.023992834 |
| Cops9    | 567.4300595 | 0.536450486 | 0.172270109 | 3.114007938 | 0.001845645 | 0.004395105 |
| Cicn7    | 823.5601683 | 0.536210735 | 0.14780819  | 3.62774713  | 0.000285905 | 0.000797466 |
| Vapa     | 1484.190894 | 0.536204222 | 0.145979979 | 3.673135349 | 0.000239592 | 0.000678711 |
| Rnpepl1  | 1232.807762 | 0.536168966 | 0.135506394 | 3.956779833 | 7.60E-05    | 0.000234023 |
| Dnm1l    | 976.5395578 | 0.536083788 | 0.19172138  | 2.796160695 | 0.005171368 | 0.011206493 |
| Llph     | 427.601253  | 0.535989806 | 0.152616597 | 3.512002075 | 0.000444745 | 0.001198168 |
| Acp1     | 1153.456752 | 0.535933817 | 0.163910199 | 3.26967949  | 0.001076694 | 0.002697748 |
| Pan2     | 1007.885143 | 0.535689947 | 0.179839712 | 2.978707772 | 0.002894667 | 0.00662482  |
| Pon2     | 786.9363041 | 0.535617989 | 0.168419585 | 3.180259531 | 0.001471432 | 0.00358408  |
| Arpp19   | 1304.686373 | 0.535431244 | 0.242843902 | 2.204837099 | 0.027465528 | 0.049790761 |
| Gm29013  | 2.783613617 | 0.535058318 | 1.342992918 | 0.398407401 | 0.690329903 | 0.760107485 |
| Gm42878  | 12.12988527 | 0.535025377 | 3.346844684 | 0.159859637 | 0.872991644 | 0.905948938 |
| Eif5a    | 6360.200532 | 0.534951218 | 0.123548031 | 4.329904852 | 1.49E-05    | 5.12E-05    |
| Mrpl44   | 350.721668  | 0.534643262 | 0.206010248 | 2.595226535 | 0.009452859 | 0.019301994 |
| Mindy3   | 641.3731979 | 0.534624939 | 0.192373138 | 2.77910391  | 0.005450909 | 0.011760015 |
| Nr6a1    | 317.1250358 | 0.534360837 | 0.246508795 | 2.167715098 | 0.03018037  | 0.054079772 |
| Olfr639  | 27.29665553 | 0.534092383 | 0.377961322 | 1.413087401 | 0.157630027 | 0.227100203 |
| Mylpf    | 15.92378808 | 0.533856123 | 0.469337077 | 1.137468461 | 0.255342502 | 0.34029698  |
| Leng9    | 65.85709298 | 0.533767865 | 0.369833784 | 1.443264212 | 0.148946057 | 0.216510264 |
| Casp8    | 574.9323126 | 0.533499366 | 0.224600119 | 2.375329848 | 0.017533274 | 0.033434816 |
| Gm6063   | 1.317559023 | 0.533362867 | 1.576863744 | 0.338242838 | 0.735180196 | NA          |
| Cebpz    | 607.0157877 | 0.532257182 | 0.142970062 | 3.722857587 | 0.000196981 | 0.000566581 |
| Cox11    | 168.7750768 | 0.532218614 | 0.184887064 | 2.878614667 | 0.00399426  | 0.008868736 |
| Vps33a   | 471.6942298 | 0.532078437 | 0.138283731 | 3.847729841 | 0.000119217 | 0.000355318 |
| Gm20939  | 22.59644565 | 0.532025152 | 0.533462414 | 0.997305785 | 0.318616107 | 0.410006596 |
| Foxa3    | 994.6738331 | 0.531999114 | 0.197411211 | 2.694877928 | 0.007041442 | 0.014814576 |
| Rab1b    | 1852.518795 | 0.531326759 | 0.16857865  | 3.15180338  | 0.001622655 | 0.003916056 |
| Olfr1564 | 4.351879879 | 0.531150291 | 1.178457305 | 0.450716618 | 0.652193804 | 0.727561835 |
| Ints4    | 481.0442513 | 0.530960327 | 0.171760386 | 3.091285133 | 0.001992922 | 0.004711597 |

|               |             |             |             |             |             |             |
|---------------|-------------|-------------|-------------|-------------|-------------|-------------|
| Ago3          | 267.9810759 | 0.530453849 | 0.218927346 | 2.422967522 | 0.015394303 | 0.029809413 |
| Ciptm1l       | 1438.526461 | 0.530015393 | 0.22037617  | 2.405048579 | 0.016170316 | 0.031129791 |
| Gpr180        | 361.6069532 | 0.52964756  | 0.166716882 | 3.176928185 | 0.001488439 | 0.003618267 |
| Usp14         | 756.753105  | 0.529508509 | 0.138262175 | 3.829742351 | 0.000128277 | 0.000380458 |
| Prpf6         | 1103.499441 | 0.528386459 | 0.201963613 | 2.61624582  | 0.008890253 | 0.018262565 |
| Pi4k2b        | 589.2561318 | 0.528085862 | 0.180478187 | 2.92603706  | 0.0034331   | 0.007733677 |
| Olf1284       | 3.703664021 | 0.527810273 | 1.152216639 | 0.458082495 | 0.646893174 | 0.72288062  |
| Gp5           | 2.288588814 | 0.52769995  | 1.090188051 | 0.484044885 | 0.628354015 | 0.707074538 |
| Supt4a        | 473.2004904 | 0.527691274 | 0.146094513 | 3.61198557  | 0.000303861 | 0.000842588 |
| Cldn20        | 3.083614129 | 0.527655994 | 1.139986423 | 0.462861648 | 0.64346354  | 0.720084444 |
| Gm21969       | 3.336036815 | 0.527619389 | 1.32544742  | 0.398068895 | 0.690579402 | 0.760185811 |
| Actr6         | 165.3011855 | 0.527402462 | 0.235011501 | 2.244155962 | 0.024822368 | 0.045521916 |
| Eif2d         | 678.4415766 | 0.527176615 | 0.159798855 | 3.299001196 | 0.000970295 | 0.002453514 |
| Gabra2        | 6.640539855 | 0.526912907 | 0.754767585 | 0.698112794 | 0.485106658 | 0.575511364 |
| Ccdc25        | 449.4293094 | 0.526810536 | 0.163555008 | 3.220999114 | 0.001277445 | 0.003157589 |
| Pnlsr         | 1675.786116 | 0.526773315 | 0.208863613 | 2.522092326 | 0.011665908 | 0.02330994  |
| Gpatch3       | 112.2961891 | 0.526606918 | 0.246019592 | 2.140508053 | 0.032313731 | 0.057500177 |
| Gm11225       | 458.071793  | 0.526571904 | 0.388090686 | 1.356826957 | 0.1748362   | 0.247805748 |
| Grin1         | 1.268007594 | 0.526469476 | 1.597447747 | 0.329569138 | 0.741725545 | NA          |
| Vnn3          | 990.4267867 | 0.526459402 | 0.2755751   | 1.910402653 | 0.05608139  | 0.093121216 |
| Rpap2         | 171.4783129 | 0.526375428 | 0.19009723  | 2.768979997 | 0.005623209 | 0.012099516 |
| Rnf187        | 1179.666971 | 0.526012542 | 0.146327296 | 3.594767037 | 0.000324682 | 0.000896676 |
| Map2k5        | 309.7956226 | 0.525934401 | 0.172934777 | 3.041229818 | 0.002356139 | 0.005492993 |
| Mcts1         | 537.9741435 | 0.525767669 | 0.198012169 | 2.655229086 | 0.007925457 | 0.016483248 |
| Ccdc141       | 302.7774    | 0.525498618 | 0.360685775 | 1.456943009 | 0.145132113 | 0.21176072  |
| Ccdc117       | 335.5081519 | 0.525360682 | 0.181247926 | 2.898574857 | 0.003748628 | 0.008374605 |
| Lrig1         | 552.5704123 | 0.525257645 | 0.198069675 | 2.651883207 | 0.008004422 | 0.016637332 |
| Zfp958        | 101.9088166 | 0.525234938 | 0.221034908 | 2.376253336 | 0.01748945  | 0.03335871  |
| Mib2          | 561.3021791 | 0.525146709 | 0.221879042 | 2.366815289 | 0.017941885 | 0.034130021 |
| Pcnp          | 1216.072562 | 0.525076576 | 0.159449812 | 3.293052343 | 0.00099106  | 0.002501939 |
| Txndc17       | 1011.364564 | 0.525031247 | 0.119098952 | 4.408361603 | 1.04E-05    | 3.66E-05    |
| Gon7          | 87.0102411  | 0.524792178 | 0.314566303 | 1.668303864 | 0.095255421 | 0.148167374 |
| N4bp2l2       | 652.9750401 | 0.524732068 | 0.204497349 | 2.565960247 | 0.010289062 | 0.020837468 |
| Supt3         | 142.9655198 | 0.524680867 | 0.308796379 | 1.699115998 | 0.08929733  | 0.140294985 |
| Zbtb43        | 503.8134141 | 0.524562176 | 0.209063606 | 2.50910327  | 0.012103809 | 0.02404962  |
| Xrcc3         | 59.99860548 | 0.523909972 | 0.342909974 | 1.527835325 | 0.126553429 | 0.188591159 |
| Gm13241       | 3.447746219 | 0.5238696   | 1.16706702  | 0.448877049 | 0.653520354 | 0.728517295 |
| Rnf111        | 589.4101384 | 0.523837747 | 0.155819776 | 3.361818128 | 0.000774311 | 0.001994026 |
| Stom          | 1039.731202 | 0.523794377 | 0.241354036 | 2.170232519 | 0.029989236 | 0.053754231 |
| Ube2k         | 817.9270613 | 0.523648496 | 0.133466156 | 3.9234553   | 8.73E-05    | 0.000266825 |
| Srrm2         | 7954.027303 | 0.523509884 | 0.234172776 | 2.235571078 | 0.025379881 | 0.046423522 |
| Scfd1         | 747.4912554 | 0.523443333 | 0.1637552   | 3.196498998 | 0.001391063 | 0.003410735 |
| Ube2cbp       | 30.72730752 | 0.523197543 | 0.389549254 | 1.343084444 | 0.179244632 | 0.253107139 |
| Tepsin        | 262.009654  | 0.522947993 | 0.210761123 | 2.481235556 | 0.013092782 | 0.025768384 |
| Nagpa         | 249.2775053 | 0.52292507  | 0.21891947  | 2.388664066 | 0.016909756 | 0.03235438  |
| Ubxn4         | 1892.852781 | 0.522874004 | 0.168679359 | 3.09981024  | 0.001936447 | 0.004588899 |
| Mtor          | 779.191325  | 0.522871866 | 0.277358047 | 1.885187293 | 0.059404556 | 0.097933359 |
| Ap5m1         | 380.4355812 | 0.52278665  | 0.234723928 | 2.227240548 | 0.025931202 | 0.04729942  |
| Mrpl19        | 266.371765  | 0.522698477 | 0.266163547 | 1.963824436 | 0.049550455 | 0.083711838 |
| Nlrx1         | 162.7409792 | 0.522250848 | 0.212738936 | 2.454890759 | 0.014092741 | 0.02753301  |
| Adprm         | 221.2964558 | 0.522014419 | 0.213723789 | 2.442472228 | 0.014587052 | 0.02839786  |
| Gapdhs        | 1.888459736 | 0.521589107 | 1.285647389 | 0.405701526 | 0.684961921 | 0.755563302 |
| D16Ert472e    | 55.95764298 | 0.521579727 | 0.323652245 | 1.61154367  | 0.107061277 | 0.163536261 |
| Nipal3        | 229.3396866 | 0.521531317 | 0.25891027  | 2.014332291 | 0.043974658 | 0.07542052  |
| Srrd          | 154.1617229 | 0.521435869 | 0.201222558 | 2.591339037 | 0.009560325 | 0.019505077 |
| Olf1678       | 3.211576823 | 0.520879741 | 1.195801718 | 0.435590393 | 0.663133942 | 0.736969195 |
| Aph1a         | 1313.191318 | 0.520758102 | 0.172110292 | 3.025723193 | 0.002480393 | 0.005751596 |
| Aamp          | 2786.76854  | 0.520309342 | 0.132353057 | 3.931222703 | 8.45E-05    | 0.000259045 |
| Tnnt1         | 24.61722971 | 0.520140611 | 0.630599684 | 0.824834875 | 0.409465344 | 0.501908323 |
| Tmem241       | 74.44280914 | 0.520042264 | 0.260014538 | 2.000050716 | 0.045494788 | 0.077769492 |
| Zfp235        | 108.0679356 | 0.519372754 | 0.242232935 | 2.144104617 | 0.032024505 | 0.05709619  |
| Thap7         | 247.2897573 | 0.519300225 | 0.147491805 | 3.520875116 | 0.000430125 | 0.001163009 |
| 5730596B20Rik | 2.39940773  | 0.518899619 | 1.140623043 | 0.454926474 | 0.649162136 | 0.724796391 |
| Fbxo34        | 324.2704001 | 0.518867066 | 0.183689918 | 2.824689946 | 0.004732639 | 0.010337223 |
| Olf1122       | 7.613809835 | 0.518587001 | 0.65112327  | 0.796449805 | 0.42577064  | 0.51772738  |
| Zfp488        | 116.4785576 | 0.518446029 | 0.304473504 | 1.702762383 | 0.088612545 | 0.139347539 |

|               |             |             |             |             |             |    |             |
|---------------|-------------|-------------|-------------|-------------|-------------|----|-------------|
| Gm44060       | 0.788072074 | 0.518425809 | 2.349123486 | 0.220689041 | 0.825334565 | NA |             |
| Ndr3          | 354.8330365 | 0.518380168 | 0.244453982 | 2.120563405 | 0.03395856  |    | 0.060029608 |
| Ficd          | 159.0557956 | 0.51808532  | 0.318356112 | 1.627376701 | 0.103657117 |    | 0.159159374 |
| Tank          | 337.0109097 | 0.518049048 | 0.160171057 | 3.234348694 | 0.001219205 |    | 0.003024594 |
| Kat8          | 318.5075639 | 0.517932603 | 0.18152181  | 2.853280288 | 0.004327044 |    | 0.009547948 |
| Eif4e         | 684.1941854 | 0.517646437 | 0.24333215  | 2.127324473 | 0.033393133 |    | 0.059153703 |
| Hpx           | 66460.40761 | 0.517492453 | 0.287054569 | 1.802766823 | 0.071424843 |    | 0.115133389 |
| Gm5113        | 79.31985335 | 0.517394785 | 0.30489154  | 1.696979801 | 0.089700479 |    | 0.140863465 |
| Gm12403       | 1.119180937 | 0.516681344 | 1.844382613 | 0.28013783  | 0.779371762 | NA |             |
| C1s1          | 9642.852973 | 0.516388503 | 0.167111219 | 3.090088789 | 0.002000967 |    | 0.00472865  |
| Gm9042        | 1.647177349 | 0.516372009 | 1.483780016 | 0.348011163 | 0.7278318   |    | 0.791129592 |
| Mrln          | 0.704464114 | 0.515991761 | 2.448631358 | 0.2107266   | 0.833100617 | NA |             |
| Zfp667        | 28.44466872 | 0.51592618  | 0.491048255 | 1.050662894 | 0.293413444 |    | 0.382629266 |
| Dnajb6        | 1066.135967 | 0.515801652 | 0.147775088 | 3.490450645 | 0.000482207 |    | 0.00129276  |
| A530064D06Rik | 7.718695425 | 0.515795699 | 0.657253315 | 0.784774586 | 0.432585743 |    | 0.524070619 |
| CAA01156929.1 | 7.718695425 | 0.515795699 | 0.657253315 | 0.784774586 | 0.432585743 |    | 0.524070619 |
| Fzd8          | 214.724696  | 0.515771332 | 0.215686838 | 2.391297202 | 0.016788956 |    | 0.032153661 |
| Imp3          | 656.8433491 | 0.515753052 | 0.1597457   | 3.228588011 | 0.00124403  |    | 0.003081694 |
| Wscd2         | 2.318226431 | 0.515477398 | 1.221067143 | 0.422153197 | 0.672913201 |    | 0.744923653 |
| Pla2g12b      | 912.1000602 | 0.515475604 | 0.162701295 | 3.168232949 | 0.001533686 |    | 0.003717656 |
| A730061H03Rik | 1.142692144 | 0.515157821 | 1.689027009 | 0.305002714 | 0.760364085 | NA |             |
| Tmem175       | 190.9670169 | 0.515143078 | 0.211029607 | 2.441093853 | 0.014642849 |    | 0.028483716 |
| Catsper2      | 81.42351239 | 0.515050571 | 0.305114158 | 1.688058576 | 0.091399985 |    | 0.143057928 |
| Clec1b        | 68.17681473 | 0.515011612 | 0.565696632 | 0.910402472 | 0.362610294 |    | 0.455082228 |
| Secisbp2l     | 1007.52921  | 0.514808168 | 0.118009645 | 4.362424519 | 1.29E-05    |    | 4.46E-05    |
| Olfr1167      | 4.997916564 | 0.51470497  | 0.926728238 | 0.555400115 | 0.578621014 |    | 0.662168963 |
| Bpnt1         | 1076.670243 | 0.514410126 | 0.205836857 | 2.49911572  | 0.012450365 |    | 0.024680677 |
| Zfp638        | 650.4338771 | 0.514166397 | 0.270509583 | 1.90073265  | 0.05733704  |    | 0.094965691 |
| Bbs7          | 86.47450587 | 0.514153699 | 0.289499974 | 1.77600603  | 0.075731923 |    | 0.121193826 |
| 4930430F08Rik | 84.16887507 | 0.513825266 | 0.287422044 | 1.787703055 | 0.073823929 |    | 0.118529886 |
| Scamp1        | 752.5388336 | 0.513566114 | 0.2291179   | 2.241492759 | 0.024994174 |    | 0.045807426 |
| Trim2         | 427.8627427 | 0.513430942 | 0.222616693 | 2.306345204 | 0.021091351 |    | 0.039408741 |
| Lyz14         | 0.511903078 | 0.51334662  | 2.98902372  | 0.17174391  | 0.863638864 | NA |             |
| Aste1         | 74.18851715 | 0.513117319 | 0.312836845 | 1.640207439 | 0.100962043 |    | 0.155638024 |
| Nfia          | 820.5833558 | 0.512648625 | 0.182421176 | 2.810247337 | 0.004950344 |    | 0.010771342 |
| Cnpy3         | 755.603049  | 0.512415445 | 0.195598817 | 2.619726711 | 0.008800026 |    | 0.0180996   |
| Use1          | 869.1606341 | 0.511927356 | 0.187138971 | 2.735546497 | 0.006227679 |    | 0.013249653 |
| Gm14610       | 0.687334907 | 0.511921682 | 2.897562168 | 0.176673235 | 0.859765066 | NA |             |
| Dffb          | 93.32730754 | 0.511612839 | 0.289214388 | 1.768974367 | 0.076898152 |    | 0.122873376 |
| Dph3          | 319.5326355 | 0.511264807 | 0.208790583 | 2.448696675 | 0.014337413 |    | 0.027953365 |
| Arpc5l        | 701.4456323 | 0.51117822  | 0.164825934 | 3.101321542 | 0.00192659  |    | 0.004568716 |
| Tbccd1        | 378.051731  | 0.511170478 | 0.223738159 | 2.284681697 | 0.022331499 |    | 0.041475911 |
| Dhcr24        | 5943.163177 | 0.511163577 | 0.305020516 | 1.675833429 | 0.093770824 |    | 0.14617822  |
| Zfp653        | 209.2134314 | 0.511148409 | 0.302609617 | 1.689134717 | 0.091193616 |    | 0.142807118 |
| Washc3        | 317.4522489 | 0.511012017 | 0.167670402 | 3.047717492 | 0.002305866 |    | 0.005383512 |
| Snx19         | 498.2126637 | 0.510237827 | 0.163673049 | 3.117421161 | 0.001824407 |    | 0.004348107 |
| Enpp5         | 487.567654  | 0.510234794 | 0.19569983  | 2.607231664 | 0.009127758 |    | 0.018696386 |
| Uba5          | 733.7333399 | 0.510094591 | 0.155399812 | 3.282465941 | 0.001029034 |    | 0.002588699 |
| H2ac8         | 3.882302952 | 0.509629963 | 1.056571584 | 0.482343053 | 0.629562268 |    | 0.708186128 |
| Fkbp4         | 2639.31083  | 0.509208361 | 0.104833459 | 4.857307656 | 1.19E-06    |    | 4.75E-06    |
| Zfand1        | 372.0440911 | 0.508919229 | 0.162608244 | 3.129725868 | 0.001749695 |    | 0.004190027 |
| Tbl2          | 333.733113  | 0.508686694 | 0.296560087 | 1.71529048  | 0.086291983 |    | 0.136087486 |
| Zscan22       | 104.6427157 | 0.508668838 | 0.239585598 | 2.123119434 | 0.033743845 |    | 0.05968099  |
| Nmnat3        | 149.812866  | 0.50842599  | 0.305146225 | 1.666171652 | 0.09567923  |    | 0.148718045 |
| Rmc1          | 395.114303  | 0.508342685 | 0.162207166 | 3.133910156 | 0.001724937 |    | 0.004134803 |
| Zfp511        | 208.234712  | 0.508117417 | 0.210801791 | 2.410403698 | 0.015934878 |    | 0.030737474 |
| Tigd2         | 196.0127402 | 0.507993542 | 0.166142236 | 3.057582198 | 0.002231304 |    | 0.00522733  |
| Olfr506       | 4.985954252 | 0.507984482 | 0.809141193 | 0.627806972 | 0.530130398 |    | 0.617959865 |
| Egfl6         | 1.981449127 | 0.507830385 | 1.421491374 | 0.357251823 | 0.720903293 |    | 0.784999958 |
| Alg13         | 148.3024064 | 0.507818705 | 0.233429079 | 2.175473196 | 0.029594675 |    | 0.053136389 |
| Ipo8          | 745.9726524 | 0.507810036 | 0.118843963 | 4.272914035 | 1.93E-05    |    | 6.52E-05    |
| Vmn1r80       | 2.600345383 | 0.507804741 | 1.14754775  | 0.442512951 | 0.658118061 |    | 0.732923746 |
| Kdm5d         | 510.2672438 | 0.507601889 | 0.171625941 | 2.957605853 | 0.003100383 |    | 0.007054902 |
| Dtnb          | 462.7976839 | 0.507459547 | 0.261256461 | 1.94238085  | 0.052091012 |    | 0.087449293 |
| Whrn          | 20.4851196  | 0.507398413 | 0.614115265 | 0.826226675 | 0.408675519 |    | 0.501122078 |
| Rbm8a         | 634.3720264 | 0.507372496 | 0.161896091 | 3.133939137 | 0.001724766 |    | 0.004134803 |



|               |             |             |             |             |             |             |
|---------------|-------------|-------------|-------------|-------------|-------------|-------------|
| A2ml1         | 537.1840916 | 0.507032473 | 0.301105378 | 1.68390374  | 0.092200273 | 0.144138493 |
| Ddhd1         | 443.464761  | 0.50702816  | 0.291817745 | 1.737482279 | 0.082302079 | 0.130471066 |
| Rrp9          | 196.6716781 | 0.506995226 | 0.209547795 | 2.419472972 | 0.015543016 | 0.030076882 |
| Nwd1          | 2.836721859 | 0.506863032 | 1.113752874 | 0.455094702 | 0.649041109 | 0.724708726 |
| Lmbrd1        | 881.9827885 | 0.506434297 | 0.204160885 | 2.480564766 | 0.013117443 | 0.025807983 |
| Faf1          | 440.4587246 | 0.506221201 | 0.215238645 | 2.351906651 | 0.018677462 | 0.035363546 |
| Gm48841       | 79.02970427 | 0.506127875 | 0.391723664 | 1.292053356 | 0.196338668 | 0.272945884 |
| Pdzd3         | 1.046838241 | 0.506103846 | 2.225165352 | 0.2274455   | 0.820077343 | NA          |
| Usp2          | 128.4357501 | 0.506038795 | 0.462094279 | 1.095098593 | 0.273473445 | 0.360208243 |
| 0610030E20Rik | 745.8379834 | 0.505909423 | 0.155529997 | 3.25280932  | 0.001142701 | 0.002850567 |
| Zfp799        | 123.8885489 | 0.505780706 | 0.322265745 | 1.569452274 | 0.116542592 | 0.176011526 |
| Gdpgp1        | 53.32641003 | 0.505742831 | 0.26816601  | 1.885931891 | 0.059304133 | 0.097786717 |
| Eif5          | 3575.595082 | 0.505672508 | 0.095954105 | 5.2699414   | 1.36E-07    | 6.17E-07    |
| Pdxk          | 676.9642486 | 0.505060436 | 0.144493189 | 3.495392695 | 0.000473365 | 0.001270254 |
| Gm4787        | 10.83718026 | 0.504759794 | 0.572555252 | 0.881591415 | 0.3779978   | 0.470098226 |
| Tgfbrap1      | 680.5448739 | 0.504737371 | 0.198964874 | 2.536816475 | 0.011186558 | 0.022462714 |
| Rab5c         | 2011.698657 | 0.504606152 | 0.116814095 | 4.319736877 | 1.56E-05    | 5.35E-05    |
| Srbd1         | 237.9628289 | 0.504386702 | 0.216251206 | 2.332411046 | 0.019679078 | 0.037058314 |
| Lrat          | 134.5001286 | 0.504181809 | 0.450372979 | 1.119476151 | 0.26293706  | 0.348294561 |
| Pabpc4l       | 3.641164115 | 0.504030826 | 1.154065295 | 0.436743768 | 0.662297184 | 0.736375294 |
| Ufl1          | 572.4034229 | 0.503990786 | 0.204356108 | 2.466237937 | 0.01365406  | 0.026752605 |
| Gm12661       | 1.822326597 | 0.503806174 | 1.269512987 | 0.396849957 | 0.691478109 | 0.760978555 |
| Rpl11         | 5149.378291 | 0.503725187 | 0.158060014 | 3.186923587 | 0.001437948 | 0.003514067 |
| Prpf18        | 545.7091439 | 0.50345248  | 0.187501029 | 2.685065157 | 0.007251567 | 0.015215349 |
| Tpp2          | 875.1385992 | 0.50335939  | 0.123018019 | 4.091753332 | 4.28E-05    | 0.000137141 |
| Smap2         | 668.9759713 | 0.503302884 | 0.157751183 | 3.190485638 | 0.001420339 | 0.003474521 |
| Dolpp1        | 287.1696039 | 0.503044596 | 0.302380875 | 1.663612475 | 0.096189897 | 0.149361997 |
| Nmd3          | 390.4807775 | 0.502984951 | 0.178803027 | 2.813067305 | 0.004907138 | 0.010684149 |
| Zscan12       | 127.2448496 | 0.502798532 | 0.295795175 | 1.699819927 | 0.089164802 | 0.140099682 |
| Vti1b         | 629.2143408 | 0.502184188 | 0.140940082 | 3.563104121 | 0.000366495 | 0.00100418  |
| Utp23         | 141.2884816 | 0.502035129 | 0.267938277 | 1.873696938 | 0.060972208 | 0.10019958  |
| Dnajb14       | 397.8689855 | 0.5020035   | 0.196063229 | 2.560416363 | 0.010454682 | 0.021115909 |
| Usp48         | 919.7188283 | 0.501939556 | 0.204727149 | 2.451748866 | 0.014216384 | 0.027745955 |
| Stat5b        | 1036.536484 | 0.501736295 | 0.120150287 | 4.175905911 | 2.97E-05    | 9.75E-05    |
| Cd59a         | 964.6151449 | 0.50163453  | 0.204045716 | 2.458441861 | 0.013954137 | 0.027287236 |
| Dnttip2       | 385.6429468 | 0.501512987 | 0.187806269 | 2.670374051 | 0.007576679 | 0.015829317 |
| Trmt1l        | 539.9000808 | 0.501468772 | 0.188843677 | 2.655470285 | 0.007919791 | 0.016475485 |
| Spcs3         | 1053.740114 | 0.501351425 | 0.194230161 | 2.581223336 | 0.009845087 | 0.020014195 |
| Mrpl48        | 451.6788485 | 0.501105197 | 0.224657944 | 2.230525159 | 0.025712599 | 0.046927351 |
| Katna1        | 272.6103061 | 0.500502455 | 0.155256437 | 3.223714669 | 0.001265394 | 0.003130524 |
| Gm15280       | 8.146836103 | 0.500472376 | 0.810757211 | 0.617290071 | 0.537043415 | 0.62422555  |
| Rnf170        | 342.6848818 | 0.500381436 | 0.153595173 | 3.257794021 | 0.001122819 | 0.00280425  |
| Eif2b5        | 710.0756298 | 0.500378838 | 0.161145873 | 3.105129706 | 0.001901956 | 0.00451833  |
| Gm17205       | 4.507144961 | 0.499889836 | 0.913386853 | 0.547292568 | 0.584177749 | 0.667273853 |
| Ddx28         | 233.472021  | 0.499658405 | 0.170634139 | 2.928244072 | 0.003408823 | 0.007691056 |
| Gdi2          | 3864.144227 | 0.499532365 | 0.160757377 | 3.107368223 | 0.001887611 | 0.004486267 |
| Rbm15         | 239.8156446 | 0.499443686 | 0.208844994 | 2.391456342 | 0.016781168 | 0.032145402 |
| Olfr155       | 0.794158829 | 0.499261914 | 2.301466958 | 0.216932036 | 0.828261311 | NA          |
| Serhl         | 472.8864825 | 0.498936677 | 0.16604815  | 3.004771064 | 0.002657808 | 0.006121361 |
| Il1r1         | 1289.755917 | 0.498716438 | 0.331149099 | 1.506017804 | 0.132062603 | 0.195519172 |
| Fosb          | 77.94278331 | 0.498624225 | 0.597192821 | 0.834946785 | 0.403747671 | 0.496758827 |
| Setmar        | 61.28284654 | 0.498565723 | 0.362273173 | 1.376214855 | 0.168755124 | 0.240345644 |
| Mgme1         | 118.1864574 | 0.498430204 | 0.2551739   | 1.953296178 | 0.05078451  | 0.085550823 |
| Shroom2       | 353.1882391 | 0.498386631 | 0.158895161 | 3.136575254 | 0.001709336 | 0.004102021 |
| Plppr2        | 369.999629  | 0.498327846 | 0.240765697 | 2.06976265  | 0.038474577 | 0.067066931 |
| Tubgcp3       | 513.6565568 | 0.498223018 | 0.200143118 | 2.489333748 | 0.012798276 | 0.025270444 |
| Gm14698       | 12.08684608 | 0.498140251 | 0.822466382 | 0.605666398 | 0.544736302 | 0.63112624  |
| Atp13a4       | 0.36697305  | 0.497884667 | 3.276466737 | 0.151957797 | 0.879220222 | NA          |
| Mfhas1        | 334.5535038 | 0.497565011 | 0.199297499 | 2.496594356 | 0.01253923  | 0.024836621 |
| Utp6          | 532.5015119 | 0.49741167  | 0.196142729 | 2.535967923 | 0.011213701 | 0.022506612 |
| Lrrc3         | 1199.510101 | 0.497216352 | 0.300401343 | 1.655173533 | 0.097889302 | 0.151586595 |
| Nol7          | 705.7146084 | 0.497189655 | 0.180442396 | 2.755392666 | 0.005862174 | 0.012559017 |
| Hdac6         | 358.8091965 | 0.497157357 | 0.223993712 | 2.219514792 | 0.026451722 | 0.048147444 |
| Mlf1          | 2.067872717 | 0.497156537 | 1.17348479  | 0.423658271 | 0.671815052 | 0.74394953  |
| Wdcp          | 148.8740646 | 0.496919966 | 0.259647216 | 1.913827435 | 0.055642209 | 0.092473033 |
| Chrd          | 195.340111  | 0.496792926 | 0.355105597 | 1.399000551 | 0.161812818 | 0.231930799 |

|               |             |             |             |             |             |             |
|---------------|-------------|-------------|-------------|-------------|-------------|-------------|
| Gm42915       | 2.83884524  | 0.496562933 | 1.131754603 | 0.438754948 | 0.660839107 | 0.735041763 |
| Acox2         | 4666.622566 | 0.496311908 | 0.219015528 | 2.266103738 | 0.023445032 | 0.04330815  |
| Olfr116       | 2.504294237 | 0.49605611  | 1.266634586 | 0.391633163 | 0.695329281 | 0.764233872 |
| Tmem147       | 1209.099488 | 0.495889889 | 0.145217831 | 3.41480028  | 0.000638288 | 0.00167331  |
| Hjurp         | 3539.208216 | 0.495851311 | 0.21077301  | 2.35253703  | 0.018645833 | 0.035307582 |
| Fbxo7         | 297.6399294 | 0.495224293 | 0.157830874 | 3.137689612 | 0.001702851 | 0.004089337 |
| Map3k10       | 246.1515399 | 0.4952064   | 0.154943891 | 3.196036937 | 0.001393293 | 0.00341522  |
| Gm29666       | 40.98275821 | 0.495190767 | 0.35658116  | 1.388718258 | 0.16491844  | 0.235609618 |
| Slc25a46      | 626.2364429 | 0.494714592 | 0.117078575 | 4.225492073 | 2.38E-05    | 7.95E-05    |
| Sin3b         | 856.5024566 | 0.494696967 | 0.176596441 | 2.801285028 | 0.005089954 | 0.011051138 |
| Utp11         | 396.5025017 | 0.494659911 | 0.128440007 | 3.851291518 | 0.000117497 | 0.000350741 |
| Are1          | 695.3326776 | 0.494449762 | 0.188748446 | 2.619622961 | 0.008802703 | 0.018100167 |
| Snx9          | 594.5510475 | 0.493991932 | 0.155755877 | 3.171578127 | 0.001516131 | 0.003678241 |
| Csta1         | 1.32079994  | 0.493988233 | 2.096218981 | 0.235656789 | 0.813699003 | NA          |
| Dyrk1b        | 301.7948857 | 0.493919004 | 0.198986365 | 2.482175124 | 0.013058308 | 0.02570944  |
| Hivep1        | 448.0453254 | 0.493688676 | 0.307265669 | 1.60671603  | 0.108116676 | 0.164981479 |
| Apbb3         | 540.2280036 | 0.49302793  | 0.215634824 | 2.286402177 | 0.022230741 | 0.041311279 |
| Ufd1          | 764.1467039 | 0.492868808 | 0.161773587 | 3.046658096 | 0.002314008 | 0.005400301 |
| Gm47853       | 20.26466467 | 0.492857337 | 0.42472931  | 1.160403405 | 0.245884601 | 0.329728678 |
| Cdhr5         | 1389.459064 | 0.492703842 | 0.179049075 | 2.751780996 | 0.005927214 | 0.012680029 |
| Fam135a       | 608.1125038 | 0.492646445 | 0.206399223 | 2.386861916 | 0.016992872 | 0.032502467 |
| Zranb2        | 765.0929202 | 0.492250202 | 0.174491467 | 2.821056012 | 0.004786584 | 0.010439004 |
| E030030I06Rik | 71.51151211 | 0.492224519 | 0.446774575 | 1.10172903  | 0.270579492 | 0.357030897 |
| Hhex          | 2140.205763 | 0.491848472 | 0.242331918 | 2.029647913 | 0.042392341 | 0.073015218 |
| Zmpste24      | 861.1513108 | 0.491688844 | 0.178459193 | 2.755189216 | 0.00586582  | 0.012564456 |
| Zfyve9        | 326.9008872 | 0.49161071  | 0.163565112 | 3.005596387 | 0.002650606 | 0.006107248 |
| Kalrn         | 559.4185962 | 0.491504952 | 0.260352062 | 1.887847359 | 0.059046445 | 0.097446641 |
| Hinfp         | 289.2064831 | 0.491111373 | 0.225268077 | 2.180119704 | 0.02924859  | 0.052592549 |
| Rnf130        | 1049.860822 | 0.490939519 | 0.141033417 | 3.481015564 | 0.000499516 | 0.001335805 |
| Apol6         | 3.266789498 | 0.490845678 | 1.032865925 | 0.475226906 | 0.634625251 | 0.712579285 |
| Gm15374       | 0.663706227 | 0.490694807 | 2.765251566 | 0.177450331 | 0.859154676 | NA          |
| Rps6kb1       | 609.0699135 | 0.490151062 | 0.194918634 | 2.514644459 | 0.011915248 | 0.023738593 |
| Foxk2         | 439.2229021 | 0.490116302 | 0.26929585  | 1.819992034 | 0.068760218 | 0.111428156 |
| Gm38303       | 7.998095052 | 0.490106305 | 0.876771618 | 0.558989701 | 0.576168749 | 0.659761206 |
| Clk1          | 2099.97944  | 0.489392509 | 0.246784927 | 1.983072928 | 0.047359284 | 0.080552836 |
| Gm12715       | 0.688945975 | 0.48877686  | 3.436967562 | 0.142211659 | 0.886912822 | NA          |
| Itch          | 964.78565   | 0.488598475 | 0.153941406 | 3.173924983 | 0.001503926 | 0.003651748 |
| Gm14295       | 80.71955129 | 0.488222642 | 0.375831745 | 1.299045779 | 0.193928219 | 0.270143378 |
| 3110040N11Rik | 191.1422498 | 0.488051508 | 0.192108464 | 2.540499761 | 0.011069417 | 0.022243213 |
| Bcl7a         | 370.2373421 | 0.487952262 | 0.265114499 | 1.84053405  | 0.06568987  | 0.106950712 |
| Atrx          | 1194.164235 | 0.487218523 | 0.222642008 | 2.188349488 | 0.028644155 | 0.051674661 |
| Snx14         | 347.1329179 | 0.487161235 | 0.152610814 | 3.192180297 | 0.001412032 | 0.003455504 |
| Dpy30         | 323.2709489 | 0.486849564 | 0.1878093   | 2.59225482  | 0.009534912 | 0.019460215 |
| Rfx7          | 451.0300809 | 0.486829451 | 0.249220904 | 1.953405362 | 0.050771581 | 0.085541781 |
| Dcaf6         | 721.4669266 | 0.486640254 | 0.18720682  | 2.599479306 | 0.009336531 | 0.019094191 |
| B4galt7       | 223.4666284 | 0.486589544 | 0.180454756 | 2.696462847 | 0.007008021 | 0.014748913 |
| Bche          | 1516.534052 | 0.48647245  | 0.207826833 | 2.340758616 | 0.019246605 | 0.036316363 |
| Grina         | 3064.991897 | 0.486246981 | 0.159945031 | 3.040088077 | 0.00236509  | 0.005511854 |
| Tas1r3        | 4.31275059  | 0.485772986 | 0.933500177 | 0.520378033 | 0.602800118 | 0.684509186 |
| Gm21897       | 55.80950612 | 0.485476585 | 0.366236082 | 1.325583712 | 0.184977624 | 0.259975148 |
| Nkd1          | 93.1984143  | 0.485418915 | 0.282898238 | 1.715878184 | 0.08618434  | 0.135955458 |
| Gm36368       | 1.178996207 | 0.485377174 | 1.817563399 | 0.267048277 | 0.789431991 | NA          |
| Ell           | 646.7217529 | 0.485058277 | 0.209593998 | 2.314275612 | 0.020652609 | 0.038673734 |
| Rbm7          | 630.3431631 | 0.484878998 | 0.17041694  | 2.845251179 | 0.004437641 | 0.009762926 |
| Mrps12        | 409.1639484 | 0.484330877 | 0.26041267  | 1.85985911  | 0.062905462 | 0.102977944 |
| 1110008P14Rik | 366.6791169 | 0.484064799 | 0.295053833 | 1.64059824  | 0.100880841 | 0.155540976 |
| Eaf2          | 16.94720202 | 0.484035716 | 0.54396623  | 0.889826776 | 0.373558907 | 0.465767004 |
| E2f7          | 54.55681164 | 0.483611859 | 0.413913278 | 1.168389333 | 0.242649756 | 0.326314825 |
| Rnf128        | 1587.617354 | 0.483486896 | 0.248763543 | 1.943560099 | 0.051948521 | 0.08727024  |
| Pdia5         | 1213.608846 | 0.483462459 | 0.251499133 | 1.922322567 | 0.054565182 | 0.090913529 |
| Hectd2        | 56.97465417 | 0.483330034 | 0.405936688 | 1.190653734 | 0.233789548 | 0.316562339 |
| Ldha          | 8294.81908  | 0.483071169 | 0.216895013 | 2.227211963 | 0.025933111 | 0.04729942  |
| Ssr3          | 4035.349505 | 0.482943561 | 0.228587945 | 2.112725414 | 0.034624277 | 0.061067108 |
| Gm3953        | 7.693490391 | 0.482901588 | 0.689704238 | 0.70015749  | 0.483828956 | 0.57415537  |
| Ythdc2        | 124.929309  | 0.48281201  | 0.260520874 | 1.853256527 | 0.063845599 | 0.104336635 |
| Mapkap1       | 657.2240465 | 0.482458657 | 0.199528302 | 2.417996113 | 0.015606244 | 0.030175257 |

|               |             |             |             |             |             |             |
|---------------|-------------|-------------|-------------|-------------|-------------|-------------|
| Draxin        | 2.021033897 | 0.4823454   | 1.666362221 | 0.289460115 | 0.772229298 | 0.827724934 |
| Fam122a       | 139.7958359 | 0.481875827 | 0.250382183 | 1.924561171 | 0.054284281 | 0.090546821 |
| Stx8          | 275.2894475 | 0.481725784 | 0.151408476 | 3.181630223 | 0.001464487 | 0.003568182 |
| Farp2         | 240.3399425 | 0.481580913 | 0.270209356 | 1.78225107  | 0.074708298 | 0.119758069 |
| Zfp125        | 126.337852  | 0.481318893 | 0.247143248 | 1.947530011 | 0.051471225 | 0.086572522 |
| Dmtf1         | 496.1911985 | 0.481046517 | 0.194709854 | 2.470581266 | 0.013489367 | 0.026463374 |
| Trim23        | 199.6679588 | 0.480920679 | 0.160005954 | 3.00564239  | 0.002650205 | 0.006107149 |
| Rab3c         | 3.580310066 | 0.480894342 | 1.032839984 | 0.465603917 | 0.641499039 | 0.718546361 |
| Borcs8        | 216.4288999 | 0.480489818 | 0.215178606 | 2.232981369 | 0.025550173 | 0.046672306 |
| Ganab         | 3582.354669 | 0.480488851 | 0.175258112 | 2.741606903 | 0.006113946 | 0.013033707 |
| Tbrg4         | 624.0731206 | 0.480384342 | 0.208298367 | 2.306231921 | 0.021097677 | 0.039416241 |
| Gdap2         | 421.3764998 | 0.480334295 | 0.198525418 | 2.419510308 | 0.01554142  | 0.030076882 |
| Dhrs3         | 3340.730082 | 0.47987396  | 0.183353733 | 2.617203114 | 0.008865357 | 0.018215814 |
| Nlk           | 270.0567145 | 0.479821111 | 0.181006521 | 2.650849861 | 0.008028952 | 0.016684249 |
| Gatad1        | 680.1631318 | 0.479685369 | 0.158019334 | 3.03561189  | 0.002400481 | 0.005586051 |
| Zmat2         | 767.111255  | 0.479621436 | 0.1401767   | 3.421548929 | 0.000622655 | 0.001634338 |
| Gps1          | 1029.269197 | 0.479522744 | 0.140584495 | 3.410921987 | 0.000647436 | 0.001694426 |
| Sgsm3         | 198.0433492 | 0.479426128 | 0.339076575 | 1.413916985 | 0.157386278 | 0.226768194 |
| Diablo        | 463.8961579 | 0.479226859 | 0.125918257 | 3.805856822 | 0.000141314 | 0.000416731 |
| Prkrip1       | 167.797841  | 0.479054274 | 0.248454137 | 1.928139652 | 0.053837758 | 0.089930051 |
| Xpo6          | 814.0451542 | 0.478975144 | 0.15185052  | 3.154254218 | 0.001609089 | 0.003886617 |
| Zmym2         | 564.8716068 | 0.478620058 | 0.155694002 | 3.07410723  | 0.002111335 | 0.004971553 |
| Syne2         | 877.1290839 | 0.478289508 | 0.23138631  | 2.06706053  | 0.038728451 | 0.067454294 |
| Scyl3         | 591.0771629 | 0.478135485 | 0.193973921 | 2.46494726  | 0.013703342 | 0.02683991  |
| Mmp15         | 829.4468184 | 0.478064879 | 0.289168067 | 1.653242298 | 0.098281561 | 0.152124937 |
| Shd3          | 37.66354955 | 0.477901545 | 0.338927036 | 1.410042561 | 0.158527116 | 0.228026517 |
| Gm12216       | 18.608554   | 0.477723404 | 0.511339177 | 0.934259344 | 0.350170131 | 0.442592645 |
| Zfp941        | 23.14774896 | 0.477539461 | 0.620835244 | 0.76918871  | 0.441781292 | 0.532956411 |
| Nprl3         | 327.497349  | 0.477279158 | 0.203084607 | 2.350149351 | 0.01876588  | 0.035515177 |
| Senp1         | 349.5899397 | 0.477050363 | 0.166934675 | 2.857706839 | 0.004267144 | 0.009431645 |
| A730046J19Rik | 0.659072032 | 0.477007987 | 2.803761458 | 0.170131444 | 0.864906765 | NA          |
| Vmn1r201      | 3.977498966 | 0.476970585 | 0.893941197 | 0.533559239 | 0.593646515 | 0.676231845 |
| Tmem196       | 1.324666653 | 0.47691793  | 1.663646154 | 0.286670293 | 0.774364786 | NA          |
| Mif           | 2235.899171 | 0.476816902 | 0.17222258  | 2.768608514 | 0.005629623 | 0.012110261 |
| Phtf2         | 112.0672989 | 0.476683142 | 0.266230619 | 1.790489555 | 0.073375245 | 0.117920548 |
| Olfr127       | 7.166324054 | 0.476420625 | 0.745571152 | 0.639000884 | 0.522822357 | 0.611196293 |
| Tsfm          | 266.2293358 | 0.476083625 | 0.180670343 | 2.635095594 | 0.008411359 | 0.017400419 |
| Tbc1d12       | 156.8397044 | 0.476075421 | 0.221635199 | 2.148013602 | 0.031712675 | 0.056599422 |
| Bcap29        | 203.3825568 | 0.47603669  | 0.168350716 | 2.827648734 | 0.004689123 | 0.010255313 |
| Kng1          | 47973.3855  | 0.475970379 | 0.290648769 | 1.637613607 | 0.101502323 | 0.156291256 |
| Zbtb44        | 752.8414797 | 0.475892429 | 0.136588352 | 3.484136242 | 0.000493728 | 0.001321157 |
| Snai2         | 144.4043813 | 0.475652044 | 0.270428722 | 1.758881378 | 0.078597659 | 0.125344517 |
| Ilkap         | 749.6460323 | 0.475639565 | 0.141501783 | 3.361367989 | 0.000775574 | 0.001996705 |
| Dus2          | 154.9362899 | 0.475579779 | 0.175237065 | 2.713922308 | 0.006649176 | 0.014065659 |
| D130007C19Rik | 4.921175455 | 0.475119407 | 0.809638942 | 0.586828748 | 0.557318727 | 0.642491862 |
| Sympk         | 1339.505818 | 0.47492542  | 0.102569655 | 4.630272186 | 3.65E-06    | 1.37E-05    |
| Desi1         | 663.8139037 | 0.474816983 | 0.187244397 | 2.535814108 | 0.011218627 | 0.022513849 |
| Pgp           | 240.9512981 | 0.474495073 | 0.257529334 | 1.84248942  | 0.065403593 | 0.106555853 |
| Arf5          | 1725.498671 | 0.474445971 | 0.149311174 | 3.177565073 | 0.001485174 | 0.003612905 |
| Wbp1          | 726.5985749 | 0.474345847 | 0.139082186 | 3.410543511 | 0.000648335 | 0.001696259 |
| Fastk         | 952.4761227 | 0.474296376 | 0.248323938 | 1.909990557 | 0.056134429 | 0.093200209 |
| Bbs4          | 98.93765107 | 0.473631133 | 0.302319252 | 1.566658855 | 0.117194453 | 0.176855009 |
| Olfr1344      | 0.235348928 | 0.473406041 | 3.629617431 | 0.130428633 | 0.896227314 | NA          |
| Gm9958        | 31.8442757  | 0.473372695 | 0.47086282  | 1.005330373 | 0.314737795 | 0.405996513 |
| Nup88         | 737.5100554 | 0.472819821 | 0.169600811 | 2.787839385 | 0.005306084 | 0.011475089 |
| Col4a3bp      | 625.2454853 | 0.472550119 | 0.184104286 | 2.566752401 | 0.010265588 | 0.020803875 |
| Rab29         | 181.9996287 | 0.472539342 | 0.216275205 | 2.184898365 | 0.028896299 | 0.052063423 |
| Adprhl2       | 284.4646558 | 0.472482114 | 0.174059828 | 2.7144811   | 0.006637969 | 0.014046554 |
| Ythdc1        | 808.9672077 | 0.472467128 | 0.165291428 | 2.858388563 | 0.004257986 | 0.009412623 |
| Smarcd2       | 1211.346775 | 0.472444235 | 0.16261794  | 2.905240561 | 0.003669709 | 0.008214444 |
| Tmem62        | 302.8762468 | 0.47243294  | 0.21218243  | 2.226541278 | 0.025977947 | 0.047371061 |
| Ppih          | 133.0922564 | 0.472270415 | 0.33962871  | 1.39054915  | 0.164362185 | 0.234972456 |
| Mrp123-ps1    | 535.3415915 | 0.472265971 | 0.154423214 | 3.058257624 | 0.002226281 | 0.005216995 |
| Cnga4         | 0.420338361 | 0.472140736 | 3.201404683 | 0.147479242 | 0.882753763 | NA          |
| Pnpla6        | 703.5432769 | 0.471998818 | 0.244703085 | 1.928863375 | 0.053747826 | 0.089797426 |
| Taf6          | 350.9487878 | 0.471983847 | 0.17040183  | 2.769828505 | 0.005608581 | 0.012074138 |



|               |             |             |             |             |             |             |
|---------------|-------------|-------------|-------------|-------------|-------------|-------------|
| H4c9          | 43.77580996 | 0.471932277 | 0.486160839 | 0.97073281  | 0.331681349 | 0.423875835 |
| Arhgap29      | 1276.156011 | 0.471924086 | 0.206536586 | 2.284941841 | 0.022316238 | 0.041452084 |
| Eif2s3x       | 1292.631129 | 0.471868194 | 0.143420569 | 3.290101253 | 0.001001513 | 0.002524464 |
| Gm9544        | 11.50845603 | 0.471722795 | 0.533211248 | 0.884682753 | 0.37632776  | 0.468431342 |
| Gm19220       | 153.6801651 | 0.471501684 | 0.248152646 | 1.900046976 | 0.057426955 | 0.095077666 |
| Onecut1       | 791.8133868 | 0.471333181 | 0.47221399  | 0.998134724 | 0.318214034 | 0.409617407 |
| Gm50115       | 5.481097502 | 0.471330784 | 0.762524471 | 0.618118897 | 0.536496967 | 0.623675437 |
| Cnppd1        | 1206.474174 | 0.471141926 | 0.197914264 | 2.380535476 | 0.017287496 | 0.033014141 |
| Def8          | 734.2196515 | 0.471077482 | 0.18175246  | 2.591863037 | 0.009545777 | 0.019477726 |
| Dctpp1        | 471.8579747 | 0.47107646  | 0.178676077 | 2.636483121 | 0.008377037 | 0.01733225  |
| Hccs          | 151.550421  | 0.470950766 | 0.243007625 | 1.938008187 | 0.052622224 | 0.088167437 |
| Tbl3          | 405.7551187 | 0.470899046 | 0.170716535 | 2.75836811  | 0.005809074 | 0.012460128 |
| Rbmxl2        | 8.876425755 | 0.470826984 | 0.777092351 | 0.605882921 | 0.544592501 | 0.631021067 |
| Mettl17       | 368.4875269 | 0.470615152 | 0.221224633 | 2.127318039 | 0.033393667 | 0.059153703 |
| Syp1          | 859.4417758 | 0.470314293 | 0.143136266 | 3.285780083 | 0.001017004 | 0.002560609 |
| Rnf20         | 512.1735847 | 0.470019651 | 0.166910562 | 2.815997052 | 0.004862611 | 0.010596676 |
| Snx32         | 126.4446574 | 0.469888816 | 0.281551617 | 1.668926007 | 0.095132045 | 0.14801598  |
| Myt1          | 0.602716361 | 0.469864078 | 2.928117188 | 0.160466282 | 0.872513781 | NA          |
| Pomgnt1       | 380.2503903 | 0.469753799 | 0.166322962 | 2.824347244 | 0.004737703 | 0.010346958 |
| Map7          | 643.4174731 | 0.469576047 | 0.160109098 | 2.932850501 | 0.003358656 | 0.007589921 |
| 4933427I04Rik | 1.56770314  | 0.46908137  | 1.483141989 | 0.31627543  | 0.751793459 | NA          |
| Acvr2a        | 383.8508603 | 0.46878913  | 0.18643793  | 2.514451482 | 0.011921771 | 0.023748813 |
| Vmn1r87       | 21.84335135 | 0.468628662 | 0.399810962 | 1.172125596 | 0.241146635 | 0.324651965 |
| Ift172        | 341.0618421 | 0.468598127 | 0.284048726 | 1.649710368 | 0.099002189 | 0.153101353 |
| Fam161a       | 46.78291791 | 0.468384921 | 0.301496007 | 1.553536065 | 0.12029512  | 0.180766083 |
| Fam131c       | 62.49156358 | 0.467779826 | 0.4415211   | 1.059473322 | 0.289384273 | 0.378271974 |
| Tfap2c        | 4.541654681 | 0.467707669 | 1.508819006 | 0.30998262  | 0.756574173 | 0.814529618 |
| Ap5s1         | 285.2319896 | 0.46754265  | 0.163182318 | 2.865155091 | 0.004168051 | 0.009224578 |
| Maco1         | 655.1019251 | 0.467520971 | 0.136166691 | 3.433445934 | 0.000595961 | 0.001570316 |
| Frs3          | 105.5246006 | 0.467341543 | 0.309827845 | 1.508391036 | 0.131454476 | 0.194737218 |
| Zfp945        | 198.3406817 | 0.467171913 | 0.206538217 | 2.261915111 | 0.023702649 | 0.043703521 |
| Dtd2          | 210.5724354 | 0.467090995 | 0.266084497 | 1.755423559 | 0.079186885 | 0.126119023 |
| 1600002K03Rik | 66.827029   | 0.467090978 | 0.277009789 | 1.686189429 | 0.091759319 | 0.143554453 |
| Ooep          | 6.655896604 | 0.466847334 | 0.671341282 | 0.695394944 | 0.486807828 | 0.576799227 |
| Hgsnat        | 806.2240403 | 0.466675934 | 0.159300774 | 2.929527092 | 0.003394782 | 0.007664448 |
| Gbp1          | 701.7340767 | 0.466631558 | 0.147442631 | 3.164834728 | 0.001551711 | 0.003757608 |
| Dmd           | 429.4064382 | 0.466532407 | 0.228930771 | 2.037875493 | 0.041562386 | 0.07178881  |
| Gpsm2         | 236.7389319 | 0.466483208 | 0.25818556  | 1.806774975 | 0.070797372 | 0.114240757 |
| Pcbp4         | 561.8539999 | 0.466153553 | 0.146031029 | 3.192154133 | 0.001412126 | 0.003455504 |
| Tars2         | 547.0312812 | 0.465643914 | 0.1996696   | 2.332072154 | 0.019696896 | 0.037087771 |
| 1810009A15Rik | 240.2150316 | 0.46560797  | 0.213679455 | 2.179002048 | 0.029331516 | 0.052708305 |
| Znhit3        | 88.70993646 | 0.465543704 | 0.216232756 | 2.152974937 | 0.031320648 | 0.055946606 |
| Mrgprb1       | 2.363637662 | 0.465478227 | 1.363646783 | 0.341348091 | 0.732841548 | 0.795206079 |
| Tollip        | 682.0598021 | 0.465356638 | 0.163958666 | 2.838255818 | 0.004536081 | 0.00995765  |
| BC031181      | 881.987881  | 0.465307736 | 0.146729355 | 3.171197324 | 0.00151812  | 0.003682542 |
| Minpp1        | 526.4146903 | 0.465295738 | 0.184784916 | 2.518039608 | 0.011801005 | 0.023538497 |
| Abhd11os      | 4.081874504 | 0.465012823 | 0.860095056 | 0.540652826 | 0.588746899 | 0.671817747 |
| Gm5786        | 1.316431871 | 0.46486972  | 1.632604419 | 0.284741187 | 0.775842433 | NA          |
| Ssc4d         | 71.4068126  | 0.464577573 | 0.291152202 | 1.59565193  | 0.110566527 | 0.168313077 |
| Gm15011       | 1.962376032 | 0.464272456 | 1.494563428 | 0.310640852 | 0.756073667 | 0.814247876 |
| Gm12286       | 9.138179506 | 0.464192676 | 0.653177449 | 0.710668559 | 0.477289648 | 0.5677389   |
| Tmem35b       | 108.6866909 | 0.463915519 | 0.327785749 | 1.415301063 | 0.156980244 | 0.226336197 |
| Mrpl50        | 861.1882291 | 0.463861967 | 0.157009752 | 2.954351311 | 0.003133271 | 0.007122134 |
| Chdh          | 3469.489228 | 0.463661424 | 0.238014207 | 1.948040958 | 0.051410062 | 0.086493511 |
| Oit1          | 2.435532105 | 0.463455174 | 1.360170315 | 0.340733193 | 0.733304448 | 0.795505837 |
| Gm11346       | 25.84401018 | 0.463425328 | 0.445495087 | 1.040247899 | 0.298224743 | 0.387776327 |
| Gmps          | 799.1794071 | 0.463102178 | 0.174730056 | 2.650386478 | 0.008039974 | 0.016705116 |
| Yeats4        | 445.4621274 | 0.463061223 | 0.16348547  | 2.832430437 | 0.004619562 | 0.010124468 |
| Ip6k1         | 1221.3227   | 0.463009949 | 0.135907047 | 3.406813406 | 0.00065726  | 0.001715135 |
| Dph1          | 329.0189197 | 0.462954956 | 0.25975084  | 1.78230398  | 0.074699674 | 0.119755505 |
| Pds5a         | 943.4239825 | 0.462816621 | 0.162268841 | 2.852159522 | 0.00434233  | 0.00957672  |
| Pigl          | 112.0824624 | 0.462668709 | 0.245757598 | 1.882622196 | 0.059751586 | 0.098476899 |
| Tyw1          | 333.6030183 | 0.462416313 | 0.18096464  | 2.555285458 | 0.010610075 | 0.021398385 |
| Isoc1         | 717.9603342 | 0.462359185 | 0.243483151 | 1.898937085 | 0.057572749 | 0.095300536 |
| Plekha3       | 340.0441341 | 0.462283136 | 0.179970327 | 2.568663083 | 0.010209166 | 0.020700032 |
| Gm21962       | 27.79524877 | 0.462176821 | 0.621632922 | 0.743488327 | 0.457186086 | 0.547800703 |

|               |             |             |             |             |             |             |
|---------------|-------------|-------------|-------------|-------------|-------------|-------------|
| Akt1s1        | 919.7238945 | 0.462153129 | 0.201139071 | 2.297679541 | 0.021580035 | 0.040211655 |
| Gsta2         | 1140.812268 | 0.461340632 | 0.696265718 | 0.662592771 | 0.507591401 | 0.597075706 |
| St8sia3       | 29.02182071 | 0.461014347 | 0.89031607  | 0.517809757 | 0.60459101  | 0.686177188 |
| Abhd14a       | 232.577366  | 0.460975483 | 0.204395049 | 2.255316286 | 0.024113483 | 0.044374639 |
| Ufm1          | 846.3793602 | 0.460779641 | 0.210424479 | 2.189762537 | 0.028541463 | 0.051511207 |
| Psmg1         | 352.1643365 | 0.460651423 | 0.200389316 | 2.29878235  | 0.021517302 | 0.040107911 |
| Zfp932        | 214.5234548 | 0.460620782 | 0.252587655 | 1.823607662 | 0.068211407 | 0.110662793 |
| Yme1l1        | 1533.888963 | 0.460605249 | 0.177943288 | 2.588494656 | 0.009639644 | 0.019643397 |
| Slc30a5       | 605.9082465 | 0.459802846 | 0.142564778 | 3.225220521 | 0.001258757 | 0.003115007 |
| Olfr352       | 2.259166176 | 0.459133375 | 1.324775742 | 0.346574413 | 0.728911071 | 0.792089308 |
| Gm47289       | 1.381603542 | 0.458954339 | 1.561735921 | 0.293874485 | 0.768853816 | NA          |
| 1110059E24Rik | 282.4339203 | 0.458692114 | 0.183100845 | 2.505133786 | 0.012240508 | 0.024298578 |
| Olfr1416      | 2.872862927 | 0.458612904 | 1.145950021 | 0.400203234 | 0.689006833 | 0.758993828 |
| Dll3          | 2.938668144 | 0.458553977 | 1.197266477 | 0.383000765 | 0.701719197 | 0.769269427 |
| Gm14387       | 60.51472334 | 0.458360856 | 0.72690386  | 0.630565995 | 0.528324339 | 0.6164025   |
| Spry4         | 152.1605925 | 0.458216147 | 0.339062467 | 1.351421028 | 0.176560602 | 0.249875904 |
| Spag7         | 588.7522098 | 0.458028525 | 0.158086747 | 2.897323983 | 0.003763609 | 0.008405229 |
| Gem           | 28.33800624 | 0.457748524 | 0.435487967 | 1.051116353 | 0.293205154 | 0.382416148 |
| Ubald1        | 604.2929998 | 0.457612267 | 0.126968971 | 3.604126759 | 0.000313204 | 0.000866662 |
| Nupr1l        | 10.69594053 | 0.457609122 | 0.897304633 | 0.509981901 | 0.610064142 | 0.691008803 |
| Spata33       | 15.12560321 | 0.457114537 | 0.673421404 | 0.678794191 | 0.497268275 | 0.586998307 |
| Snx25         | 187.3834274 | 0.456900067 | 0.279904144 | 1.632344779 | 0.102606875 | 0.157788382 |
| Gm43191       | 1.528001082 | 0.456502331 | 2.416960526 | 0.18887455  | 0.850191141 | NA          |
| Ddx50         | 918.6394814 | 0.456439739 | 0.110721805 | 4.122401552 | 3.75E-05    | 0.000121199 |
| Timm10        | 263.6136857 | 0.456224103 | 0.20418794  | 2.234334221 | 0.02546109  | 0.04654307  |
| Ss18l1        | 106.8658392 | 0.456222378 | 0.210732585 | 2.164935138 | 0.030392653 | 0.054420118 |
| Slc30a9       | 1048.923936 | 0.456030831 | 0.201071073 | 2.268008141 | 0.023328711 | 0.043154064 |
| Usp19         | 1526.103715 | 0.455988684 | 0.137459577 | 3.317256568 | 0.000909061 | 0.002313381 |
| Mb21d2        | 262.9995319 | 0.455944828 | 0.207460072 | 2.197747372 | 0.027967114 | 0.050592461 |
| Smarrcc2      | 2045.070491 | 0.455709214 | 0.131087035 | 3.476386623 | 0.000508219 | 0.001355675 |
| Rngtt         | 151.3558588 | 0.455626337 | 0.268318455 | 1.698080502 | 0.089492569 | 0.140588769 |
| Ube2d3        | 3750.497563 | 0.455438433 | 0.176812325 | 2.575829677 | 0.009999989 | 0.02030005  |
| Rps27rt       | 68.53968504 | 0.45538918  | 0.613340085 | 0.742474185 | 0.457800087 | 0.548497848 |
| Slc27a4       | 491.4067987 | 0.455323478 | 0.202157743 | 2.252317773 | 0.024302198 | 0.044683334 |
| Gm19001       | 2.725157055 | 0.455245397 | 1.168307688 | 0.389662245 | 0.696786318 | 0.765436765 |
| Nme2          | 4096.401455 | 0.455105854 | 0.196549251 | 2.315479969 | 0.02058668  | 0.038562983 |
| Rufy4         | 13.27053651 | 0.455055482 | 0.671463929 | 0.677706519 | 0.497957793 | 0.587649484 |
| Drap1         | 1001.512547 | 0.454570726 | 0.122291071 | 3.71712114  | 0.000201506 | 0.000578426 |
| Ccnt1         | 512.7933735 | 0.454536334 | 0.160893234 | 2.82508047  | 0.004726874 | 0.010327278 |
| Kbtbd7        | 166.6873858 | 0.454367399 | 0.201870485 | 2.250786681 | 0.024399052 | 0.044846904 |
| Fam220a       | 159.7883073 | 0.45425196  | 0.233215809 | 1.94777516  | 0.051441872 | 0.086538488 |
| Nfix          | 1479.740904 | 0.453999638 | 0.189492327 | 2.395873461 | 0.016580813 | 0.031817842 |
| Polr2b        | 624.1652755 | 0.453928711 | 0.132726775 | 3.42002365  | 0.000626157 | 0.001643276 |
| Zranb1        | 1266.840924 | 0.453911331 | 0.180653261 | 2.512610785 | 0.011984147 | 0.02386608  |
| Rptor         | 549.8932922 | 0.453716438 | 0.184827271 | 2.45481327  | 0.014095779 | 0.02753579  |
| Saysd1        | 242.2920904 | 0.453492429 | 0.209260738 | 2.167116642 | 0.030225961 | 0.054150083 |
| Gid8          | 560.1608815 | 0.453330092 | 0.211608861 | 2.142302027 | 0.032169186 | 0.057288236 |
| Gm12482       | 1.181501653 | 0.453258132 | 1.546818315 | 0.293026096 | 0.769502205 | NA          |
| Zswim8        | 1254.237985 | 0.453133471 | 0.178212788 | 2.542654075 | 0.011001409 | 0.022116983 |
| Fam193a       | 451.0229796 | 0.453089378 | 0.20547701  | 2.205061176 | 0.027449802 | 0.049772003 |
| Nptx1         | 1.685720948 | 0.453071079 | 1.705432501 | 0.265663448 | 0.790498416 | 0.841855135 |
| Dnaja2        | 1723.561842 | 0.452953824 | 0.16495276  | 2.745960858 | 0.006033396 | 0.012882933 |
| Abcc10        | 405.8495266 | 0.452893281 | 0.249846662 | 1.812684943 | 0.069880428 | 0.11298573  |
| Det1          | 96.42592168 | 0.452796567 | 0.218133735 | 2.075775058 | 0.03791476  | 0.06620617  |
| Asna1         | 675.1043577 | 0.45278693  | 0.149539767 | 3.027869704 | 0.002462843 | 0.005715088 |
| Cmtr1         | 758.4289811 | 0.452500834 | 0.127143527 | 3.558976574 | 0.000372303 | 0.001018456 |
| Dhtkd1        | 1220.063827 | 0.452170612 | 0.232698582 | 1.943160152 | 0.051996811 | 0.087316946 |
| Slco1a6       | 37.55102671 | 0.452149572 | 0.424088329 | 1.066168393 | 0.286347527 | 0.37479099  |
| Gm8750        | 0.673317886 | 0.452093655 | 2.375990315 | 0.190275883 | 0.849092951 | NA          |
| Adat1         | 124.0291916 | 0.452063009 | 0.212611746 | 2.126237226 | 0.033483512 | 0.059290208 |
| Tmem30b       | 661.8176932 | 0.452025023 | 0.286826576 | 1.57595237  | 0.11503678  | 0.174153897 |
| Pramel7       | 0.674128352 | 0.451858752 | 2.375439117 | 0.190221146 | 0.849135841 | NA          |
| Tbp           | 296.736618  | 0.451751158 | 0.223731673 | 2.01916497  | 0.043470076 | 0.07469037  |
| Zfp112        | 28.50943445 | 0.451647283 | 0.396323194 | 1.139593367 | 0.25445575  | 0.33930087  |
| Gm8228        | 1.196929266 | 0.451645147 | 2.231472367 | 0.202397822 | 0.839605731 | NA          |
| Col18a1       | 15168.4656  | 0.451616691 | 0.151489916 | 2.981166686 | 0.002871524 | 0.006576269 |

|               |             |             |             |             |                |             |
|---------------|-------------|-------------|-------------|-------------|----------------|-------------|
| Mycn          | 23.36958412 | 0.451103105 | 0.495217288 | 0.910919542 | 0.362337768    | 0.454802995 |
| Mterf2        | 60.24613686 | 0.450969436 | 0.288744483 | 1.561828752 | 0.118328336    | 0.178300493 |
| Thoc2         | 562.6505839 | 0.450753475 | 0.197076142 | 2.287204679 | 0.022183879    | 0.041246676 |
| Gm48676       | 1.035441654 | 0.450655386 | 1.706659454 | 0.264057006 | 0.791735993 NA |             |
| Dnph1         | 119.0264324 | 0.450350491 | 0.389998007 | 1.154750751 | 0.24819251     | 0.332281712 |
| Aqp5          | 1.39100286  | 0.44986793  | 1.899597423 | 0.236822773 | 0.812794284 NA |             |
| Catsperd      | 25.66201259 | 0.449643442 | 0.505812541 | 0.888952736 | 0.374028481    | 0.466250187 |
| Trabd         | 1513.40608  | 0.449456355 | 0.275170229 | 1.633375664 | 0.102390012    | 0.157525939 |
| Stap2         | 993.4606079 | 0.449256937 | 0.178347945 | 2.518991384 | 0.011769154    | 0.023485957 |
| Ctns          | 335.6796044 | 0.449142519 | 0.16207264  | 2.771242072 | 0.005584289    | 0.012027917 |
| Tkt           | 3091.209154 | 0.448094713 | 0.206421457 | 2.170775846 | 0.029948121    | 0.053697472 |
| Fam136a       | 705.6854389 | 0.448061168 | 0.120133471 | 3.729694689 | 0.000191712    | 0.000552545 |
| Gm12439       | 1.058567242 | 0.448054562 | 1.905846968 | 0.235094721 | 0.814135216 NA |             |
| Tm9sf2        | 2509.782    | 0.447962497 | 0.14983989  | 2.989607749 | 0.002793359    | 0.006411037 |
| Krit1         | 461.8666123 | 0.447776037 | 0.18009684  | 2.486307014 | 0.012907656    | 0.025445157 |
| Gm6345        | 10.62627647 | 0.447603068 | 0.659377158 | 0.678827075 | 0.497247436    | 0.586998307 |
| Gm4654        | 0.685212085 | 0.447563134 | 2.753892053 | 0.162520217 | 0.870896209 NA |             |
| Rab5a         | 1055.166988 | 0.44736057  | 0.182076463 | 2.456992866 | 0.014010547    | 0.027384981 |
| Yod1          | 263.6280684 | 0.447206886 | 0.283080746 | 1.579785601 | 0.114155974    | 0.173035569 |
| Sfnf1c        | 1456.468311 | 0.447036783 | 0.106436775 | 4.200021854 | 2.67E-05       | 8.81E-05    |
| Tfg           | 1094.890551 | 0.446726055 | 0.124580921 | 3.585830404 | 0.000336007    | 0.000924807 |
| Pelo          | 324.2171388 | 0.446506526 | 0.198691877 | 2.247230901 | 0.024625274    | 0.045223707 |
| Kdm4a         | 696.9225855 | 0.446420764 | 0.186850162 | 2.389191211 | 0.016885512    | 0.032318873 |
| Ltpbbp10      | 387.2714061 | 0.446177411 | 0.226067176 | 1.973649684 | 0.04842159     | 0.082154784 |
| Grrc40        | 212.2276358 | 0.44613517  | 0.239411733 | 1.863464104 | 0.062396998    | 0.102233929 |
| Pdlim5        | 827.7859313 | 0.446097462 | 0.143002394 | 3.119510445 | 0.001811518    | 0.004320476 |
| Vps26a        | 680.6934121 | 0.445945676 | 0.166055312 | 2.685524908 | 0.007241598    | 0.015198173 |
| Ifi27         | 1009.589098 | 0.445686491 | 0.368571951 | 1.209225201 | 0.226576338    | 0.308298621 |
| Olfr1441      | 1.668857186 | 0.445595754 | 1.523113952 | 0.292555756 | 0.769861736    | 0.82549864  |
| Shtn1         | 885.3311633 | 0.445518912 | 0.12748424  | 3.49469794  | 0.000474599    | 0.001273364 |
| Vmn1r86       | 5.732451305 | 0.445496058 | 0.794387846 | 0.560804222 | 0.574931008    | 0.658565063 |
| Efcab3        | 1.002227036 | 0.44545826  | 2.206160056 | 0.201915658 | 0.839982661 NA |             |
| Elmo3         | 627.2628741 | 0.445337453 | 0.165376967 | 2.692862617 | 0.007084145    | 0.014900741 |
| Cep97         | 125.3855594 | 0.445322443 | 0.343813922 | 1.295242613 | 0.195236549    | 0.271803191 |
| Csnk2a1       | 1866.821355 | 0.445294184 | 0.146183949 | 3.04612228  | 0.002318135    | 0.005409194 |
| Itprid2       | 594.5182583 | 0.445097077 | 0.194825826 | 2.284589712 | 0.022336897    | 0.0414769   |
| Wdr83os       | 560.5771182 | 0.4447087   | 0.20072753  | 2.215484345 | 0.026726838    | 0.048617065 |
| Snap47        | 1095.530509 | 0.444356773 | 0.23377695  | 1.90077239  | 0.057331832    | 0.094965691 |
| Tcim          | 454.0448087 | 0.444260738 | 0.358371825 | 1.239664245 | 0.215099607    | 0.294871189 |
| Henmt1        | 0.629712979 | 0.44415059  | 2.933344271 | 0.151414409 | 0.879648824 NA |             |
| Zbtb17        | 239.625757  | 0.444073089 | 0.17507344  | 2.536496046 | 0.011196801    | 0.022477986 |
| Apom          | 1879.17607  | 0.443740704 | 0.311106899 | 1.426328719 | 0.153773478    | 0.222502993 |
| 4-Mar         | 1.050033221 | 0.443672294 | 1.984847992 | 0.223529608 | 0.823123342 NA |             |
| Tfpt          | 172.2950247 | 0.443630034 | 0.251554119 | 1.763557025 | 0.077806588    | 0.124175877 |
| Zfp131        | 261.8269422 | 0.443501544 | 0.175967117 | 2.52036603  | 0.011723286    | 0.023410867 |
| Gm2539        | 6.630575902 | 0.443139653 | 0.7933119   | 0.558594486 | 0.576438504    | 0.660025765 |
| Dglucy        | 765.3880999 | 0.442971595 | 0.226004909 | 1.960008727 | 0.04999477     | 0.084370505 |
| Phf12         | 779.4852191 | 0.442816726 | 0.127781167 | 3.46543029  | 0.000529384    | 0.001408605 |
| Klra8         | 2.494568011 | 0.442694044 | 1.233233049 | 0.358970306 | 0.719617303    | 0.784050348 |
| Cdk5rap1      | 153.3821003 | 0.442682741 | 0.262228686 | 1.688155281 | 0.091381425    | 0.143050117 |
| Fbxo15        | 4.685493703 | 0.442518677 | 1.124188607 | 0.393633839 | 0.693851394    | 0.763097772 |
| Abcg5         | 1631.122878 | 0.442036117 | 0.224542848 | 1.968604747 | 0.048998497    | 0.082951974 |
| Fmnl2         | 155.982697  | 0.441746707 | 0.237587631 | 1.859300105 | 0.062984612    | 0.103097616 |
| Abca1         | 2267.882751 | 0.441681596 | 0.188780135 | 2.339661409 | 0.019301229    | 0.036415157 |
| 1110012L19Rik | 185.4721242 | 0.44143383  | 0.202091358 | 2.184328087 | 0.028938148    | 0.052116792 |
| Dcaf12        | 551.4204947 | 0.441315147 | 0.156297505 | 2.823558495 | 0.004749376    | 0.010371123 |
| Txn1          | 1923.200375 | 0.440806277 | 0.128450718 | 3.431715162 | 0.000599777    | 0.00157884  |
| Gm5481        | 4.833508287 | 0.44058119  | 0.873326988 | 0.504485944 | 0.613919937    | 0.694361247 |
| Ddx47         | 643.2790112 | 0.440571558 | 0.140984222 | 3.124970658 | 0.001778228    | 0.004251189 |
| Rsb1          | 187.3539613 | 0.44051024  | 0.180437078 | 2.441350999 | 0.014632425    | 0.028466688 |
| Rps12l1       | 355.5037627 | 0.440478945 | 2.882047735 | 0.152835409 | 0.878528073    | 0.910686282 |
| 2310030G06Rik | 356.1905618 | 0.440287027 | 0.210046387 | 2.096141874 | 0.036069607    | 0.063295385 |
| Nop10         | 843.1953684 | 0.440254757 | 0.146927654 | 2.996404995 | 0.002731833    | 0.006279975 |
| Abca8b        | 1315.011207 | 0.439810976 | 0.265172468 | 1.658584612 | 0.097199525    | 0.150710095 |
| Prdx4         | 1583.801752 | 0.439807842 | 0.244289554 | 1.800354683 | 0.071804652    | 0.115679994 |
| Gm3365        | 6.306651953 | 0.439588479 | 0.682414329 | 0.644166542 | 0.519467444    | 0.608030506 |

|               |             |             |             |             |             |             |
|---------------|-------------|-------------|-------------|-------------|-------------|-------------|
| Snx33         | 311.0769269 | 0.439499759 | 0.158676891 | 2.769777985 | 0.005609451 | 0.012074486 |
| Cacybp        | 545.2781022 | 0.439182816 | 0.216331179 | 2.030141088 | 0.0423422   | 0.072973092 |
| Cdh2          | 1802.180002 | 0.438793408 | 0.157855949 | 2.779707766 | 0.005440784 | 0.011744047 |
| Hspb11        | 91.37627073 | 0.438630052 | 0.227919    | 1.924499719 | 0.054291976 | 0.090546821 |
| Hdgfl2        | 858.6925876 | 0.438620461 | 0.22470459  | 1.951987099 | 0.050939736 | 0.08577841  |
| Mtmr4         | 905.2381812 | 0.438511558 | 0.249371889 | 1.758464276 | 0.078668545 | 0.125422365 |
| Tmem14a       | 93.70081355 | 0.438507333 | 0.250374554 | 1.751405348 | 0.079876113 | 0.127015014 |
| Pigg          | 198.1952171 | 0.438267307 | 0.195947488 | 2.236656934 | 0.025308771 | 0.046319262 |
| Zw10          | 226.146834  | 0.437890684 | 0.193112004 | 2.267547719 | 0.023356787 | 0.043182573 |
| Tnfrsf11b     | 20.37168599 | 0.437888296 | 0.680275206 | 0.643692864 | 0.519774618 | 0.608300796 |
| Dcps          | 304.3964714 | 0.437793442 | 0.17865792  | 2.450456389 | 0.014267524 | 0.027837233 |
| Snap29        | 452.1550641 | 0.43739704  | 0.192500975 | 2.272180904 | 0.023075586 | 0.042713637 |
| Dock4         | 453.2736068 | 0.437247926 | 0.170380813 | 2.566297917 | 0.01027905  | 0.02082439  |
| Exosc10       | 503.9673267 | 0.437206743 | 0.162795327 | 2.685622195 | 0.00723949  | 0.015195619 |
| Cenpb         | 1626.055411 | 0.437057803 | 0.133669011 | 3.269701776 | 0.001076609 | 0.002697748 |
| Casd1         | 515.5439008 | 0.436884569 | 0.329006785 | 1.327889238 | 0.184214701 | 0.258945598 |
| Dclre1a       | 317.2617939 | 0.436863242 | 0.219256072 | 1.992479558 | 0.046318466 | 0.079034852 |
| Trbv13-1      | 0.671159168 | 0.436854119 | 2.377401396 | 0.183752781 | 0.8542074   | NA          |
| Cyb5r4        | 475.1432692 | 0.436742475 | 0.238133271 | 1.834025433 | 0.066650219 | 0.108379715 |
| Gm7972        | 10.50340647 | 0.436563811 | 0.676107554 | 0.64570172  | 0.518472547 | 0.60706868  |
| Hspa9         | 7306.085335 | 0.436548306 | 0.146876808 | 2.972207207 | 0.002956671 | 0.006758557 |
| Grhl3         | 0.701708072 | 0.436405823 | 2.144156174 | 0.203532666 | 0.838718716 | NA          |
| Zfp735        | 2.10441912  | 0.436104536 | 1.359375851 | 0.320812332 | 0.748352614 | 0.807643724 |
| Upf1          | 1168.334441 | 0.436101041 | 0.15314661  | 2.847604916 | 0.004404957 | 0.009696025 |
| Pcdh1         | 1484.588191 | 0.43583745  | 0.1812841   | 2.404168101 | 0.016209318 | 0.031189215 |
| Atp8b5        | 18.27599949 | 0.435732778 | 0.470235713 | 0.926626299 | 0.354120595 | 0.446560242 |
| Msantd2       | 231.7078229 | 0.435665935 | 0.234978271 | 1.854069027 | 0.063729285 | 0.104166525 |
| Cd209b        | 1.545231398 | 0.435659283 | 1.549601169 | 0.281142846 | 0.778600839 | NA          |
| 2810025M15Rik | 74.15465032 | 0.435334302 | 0.348143387 | 1.250445416 | 0.211136883 | 0.290232348 |
| Kmt5b         | 661.0269862 | 0.435305421 | 0.172237479 | 2.527355972 | 0.011492495 | 0.023022803 |
| Eef1akmt1     | 116.7308394 | 0.434939684 | 0.233273282 | 1.864507074 | 0.062250529 | 0.102023363 |
| Haus4         | 269.8018084 | 0.434819928 | 0.288009199 | 1.509743196 | 0.131108965 | 0.194326693 |
| Polr3c        | 412.0772614 | 0.434644452 | 0.190052083 | 2.286975473 | 0.022197255 | 0.041262545 |
| Fkbp1         | 85.33124603 | 0.43441262  | 0.219700117 | 1.977298078 | 0.048007947 | 0.081512601 |
| Kif24         | 39.17079084 | 0.433984402 | 0.363929612 | 1.19249544  | 0.233067038 | 0.315794537 |
| Gak           | 1234.218293 | 0.433802296 | 0.187305225 | 2.316018133 | 0.020557279 | 0.038516374 |
| Nrap          | 1.964656358 | 0.433647774 | 1.590742704 | 0.272607112 | 0.785155245 | 0.837629951 |
| Sh3gl2        | 7.175672428 | 0.433480166 | 0.642003682 | 0.675198878 | 0.49954942  | 0.588997753 |
| Vpreb1        | 3.783050934 | 0.433420152 | 1.024902463 | 0.42288917  | 0.672376125 | 0.744425781 |
| Ctdsp1        | 2624.851665 | 0.433327637 | 0.180180802 | 2.404960089 | 0.016174232 | 0.031132247 |
| Pard6a        | 58.42379741 | 0.433153534 | 0.354370165 | 1.222319418 | 0.221586859 | 0.30240672  |
| Wdr75         | 338.0086551 | 0.432666249 | 0.192762069 | 2.244561143 | 0.02479632  | 0.045483931 |
| Olfr341       | 2.693867717 | 0.432538714 | 1.146427867 | 0.377292568 | 0.705956194 | 0.77232284  |
| Cnot7         | 712.0400012 | 0.43220652  | 0.158336944 | 2.729663131 | 0.006339907 | 0.013470005 |
| Ddx56         | 520.4216044 | 0.432140433 | 0.179202329 | 2.41146661  | 0.015888507 | 0.030661904 |
| Tmem120b      | 83.62989244 | 0.43205627  | 0.336294442 | 1.284755903 | 0.198877596 | 0.275894317 |
| Ddx19b        | 351.4007679 | 0.431754664 | 0.171562665 | 2.516600361 | 0.011849315 | 0.02362476  |
| Olfr1209      | 1.357971802 | 0.431563129 | 1.636748229 | 0.263671053 | 0.792033403 | NA          |
| Gm16374       | 2.334607481 | 0.431555021 | 1.501402724 | 0.287434553 | 0.773779607 | 0.829126005 |
| Zfp839        | 221.3432884 | 0.431473784 | 0.208319129 | 2.071215384 | 0.038338673 | 0.066857374 |
| Gm16274       | 2.35185826  | 0.431301924 | 1.225233494 | 0.352016106 | 0.724826184 | 0.788566482 |
| Lrrfip2       | 756.3913265 | 0.431301003 | 0.141444321 | 3.049263479 | 0.002294032 | 0.005359553 |
| Fbxo22        | 828.0310966 | 0.431174646 | 0.169252528 | 2.547522632 | 0.010849082 | 0.021833921 |
| AC164084.1    | 1.037152628 | 0.431019158 | 2.661702434 | 0.161933638 | 0.871358113 | NA          |
| Kif1c         | 3470.430407 | 0.430749522 | 0.16799602  | 2.564045989 | 0.010345983 | 0.02094257  |
| Lsm12         | 478.416327  | 0.430732911 | 0.126285103 | 3.410797473 | 0.000647732 | 0.00169494  |
| Gm18064       | 0.845037895 | 0.430607462 | 2.32017307  | 0.18559282  | 0.852764085 | NA          |
| Pde3b         | 1058.333182 | 0.430594883 | 0.202012331 | 2.13152772  | 0.033045691 | 0.058640881 |
| Gtf3c2        | 1229.872783 | 0.430150466 | 0.187097095 | 2.299076137 | 0.021500616 | 0.040085576 |
| Fbxl20        | 994.4794579 | 0.429820397 | 0.112718882 | 3.813206696 | 0.000137175 | 0.000405297 |
| Nectin1       | 1012.699336 | 0.42965988  | 0.196473043 | 2.186864281 | 0.028752433 | 0.051831604 |
| Gm12792       | 7.010502623 | 0.429605572 | 0.734236835 | 0.585104903 | 0.558477182 | 0.643566243 |
| Dctn2         | 2306.117098 | 0.429596147 | 0.107424346 | 3.999057617 | 6.36E-05    | 0.000198276 |
| Bod1          | 396.5058843 | 0.429399745 | 0.152210662 | 2.821088484 | 0.0047861   | 0.010439004 |
| Eny2          | 1311.864017 | 0.42896063  | 0.137092444 | 3.128988132 | 0.001754094 | 0.004199381 |
| Tcf25         | 3306.719822 | 0.428652367 | 0.117672196 | 3.64276678  | 0.000269723 | 0.000756463 |

|          |             |             |             |             |             |             |
|----------|-------------|-------------|-------------|-------------|-------------|-------------|
| Pusl1    | 117.9648296 | 0.428604058 | 0.259519886 | 1.651526844 | 0.098631044 | 0.152610459 |
| Phex     | 2.610445321 | 0.428443715 | 1.23914584  | 0.345757296 | 0.729525121 | 0.79256591  |
| Hbxl22   | 16.65026819 | 0.428440397 | 0.5655499   | 0.75756427  | 0.448711877 | 0.539809475 |
| Hypk     | 237.4786853 | 0.4282977   | 0.195101535 | 2.195255413 | 0.028145281 | 0.050866188 |
| Kctd9    | 219.8311239 | 0.428140403 | 0.180967902 | 2.365836148 | 0.017989404 | 0.034208964 |
| Pmf1     | 300.8021853 | 0.428067838 | 0.242108083 | 1.768085697 | 0.077046578 | 0.123078155 |
| Zfyve21  | 621.5576467 | 0.428016851 | 0.311437732 | 1.374325608 | 0.16934062  | 0.241078821 |
| Dnmt3a   | 624.8688755 | 0.427868545 | 0.196101076 | 2.181877601 | 0.029118567 | 0.052391909 |
| Rchy1    | 543.7699322 | 0.427853311 | 0.182640349 | 2.342600165 | 0.019149893 | 0.036157645 |
| Cryzl2   | 395.408983  | 0.427490815 | 0.246063928 | 1.737316066 | 0.082331397 | 0.130493275 |
| Tmem143  | 373.1873925 | 0.427254463 | 0.226422504 | 1.886978796 | 0.059163178 | 0.097620388 |
| Hars2    | 472.9227884 | 0.427252008 | 0.171668981 | 2.488813099 | 0.012817033 | 0.025298688 |
| Ptcra    | 2.075971222 | 0.427138709 | 1.388204931 | 0.307691393 | 0.75831717  | 0.816045393 |
| Prmt9    | 211.245729  | 0.427042865 | 0.207727315 | 2.055785806 | 0.039803167 | 0.069135444 |
| Adal     | 215.2019372 | 0.426982825 | 0.239121903 | 1.785628253 | 0.074159469 | 0.119012579 |
| Usp15    | 768.8488757 | 0.426890056 | 0.136695192 | 3.122933949 | 0.001790579 | 0.004277119 |
| Ufc1     | 1092.133724 | 0.426550802 | 0.179057481 | 2.382200397 | 0.017209529 | 0.032879979 |
| Gopc     | 500.8916509 | 0.426163094 | 0.184850055 | 2.3054529   | 0.021141222 | 0.039484613 |
| Snapin   | 483.0906773 | 0.426143843 | 0.15489473  | 2.751183609 | 0.005938035 | 0.01269999  |
| Ints11   | 293.9084289 | 0.42607979  | 0.156944987 | 2.714835303 | 0.006630874 | 0.014033909 |
| Gm49388  | 39.58991646 | 0.425966787 | 3.336437122 | 0.127671157 | NA          | NA          |
| Psm13    | 1017.645687 | 0.42548334  | 0.185171884 | 2.297775072 | 0.021574594 | 0.040205912 |
| Ap3b1    | 854.6639355 | 0.425284375 | 0.207656975 | 2.048013921 | 0.040558635 | 0.07026866  |
| Stxbp3   | 484.4386274 | 0.425128304 | 0.127147876 | 3.343573777 | 0.000827067 | 0.002119002 |
| Ctdnep1  | 781.1208594 | 0.425104724 | 0.128856183 | 3.299063447 | 0.00097008  | 0.00245343  |
| Prkacb   | 750.523476  | 0.425097484 | 0.149476378 | 2.843910793 | 0.004456352 | 0.009800296 |
| Rpl711   | 998.99073   | 0.425082512 | 0.123317738 | 3.447050832 | 0.000566742 | 0.001499952 |
| Numb     | 737.6384937 | 0.425082349 | 0.156390606 | 2.718081094 | 0.006566174 | 0.013907335 |
| Rbm17    | 762.2423445 | 0.425079922 | 0.122872138 | 3.459530615 | 0.000541118 | 0.001437136 |
| Szrd1    | 1392.004457 | 0.424973594 | 0.189117563 | 2.247139759 | 0.024631097 | 0.045228377 |
| Reps1    | 396.3549331 | 0.424646726 | 0.161588094 | 2.627958015 | 0.008589912 | 0.017722475 |
| Arcn1    | 2589.661633 | 0.42440679  | 0.126384308 | 3.358065552 | 0.0007849   | 0.002018247 |
| Gm9480   | 2.552794277 | 0.424385437 | 1.140349472 | 0.372153842 | 0.709778311 | 0.775660297 |
| Parp9    | 768.562136  | 0.424215599 | 0.255654418 | 1.659332166 | 0.097048877 | 0.150517581 |
| Ube2w    | 358.3051125 | 0.424174435 | 0.161948066 | 2.619200372 | 0.008813616 | 0.018118236 |
| Ost4     | 1019.950085 | 0.424139551 | 0.176600952 | 2.401683264 | 0.016319832 | 0.031377072 |
| Gm46223  | 5961.633794 | 0.423872847 | 0.412045655 | 1.028703597 | 0.303618979 | 0.393709315 |
| Eipr1    | 174.7730813 | 0.42365054  | 0.273069599 | 1.551437957 | 0.120796765 | 0.181344069 |
| Slc22a23 | 1155.422679 | 0.423127258 | 0.279466575 | 1.514053182 | 0.130012352 | 0.192969752 |
| Fam129c  | 25.62164747 | 0.422948103 | 0.458051978 | 0.923362683 | 0.355818232 | 0.448203725 |
| Mrip-ps  | 86.98296163 | 0.422934128 | 0.343254019 | 1.232131612 | 0.217899924 | 0.298350166 |
| Eip5     | 433.6500663 | 0.422891177 | 0.153294823 | 2.758678792 | 0.005803555 | 0.012451422 |
| Smcr8    | 479.0143126 | 0.421714843 | 0.219950747 | 1.917314896 | 0.055197939 | 0.091824206 |
| Tmem179b | 266.4734917 | 0.421558852 | 0.178513247 | 2.36149898  | 0.018201222 | 0.034577048 |
| Tmem45b  | 3.001940131 | 0.421496437 | 1.028338934 | 0.40988085  | 0.681893354 | 0.752714186 |
| lkbk     | 1099.838923 | 0.421458796 | 0.132632015 | 3.177655082 | 0.001484713 | 0.003612299 |
| Vmn1r90  | 14.37870819 | 0.421300578 | 0.537417274 | 0.783935685 | 0.43307785  | 0.524368692 |
| Nudc     | 1089.243621 | 0.420442319 | 0.161601581 | 2.601721562 | 0.009275713 | 0.018976641 |
| Tfam     | 631.5553913 | 0.420434483 | 0.158910966 | 2.645723533 | 0.008151641 | 0.01691034  |
| Pde2a    | 42.16665315 | 0.420079945 | 0.697808633 | 0.601998779 | 0.54717495  | 0.633358019 |
| Pqlc1    | 1293.3592   | 0.420002925 | 0.218665998 | 1.920750962 | 0.054763111 | 0.091180928 |
| Zfp292   | 417.7254331 | 0.419939292 | 0.182501772 | 2.301014882 | 0.02139079  | 0.03989827  |
| Ibtk     | 733.3162522 | 0.419842846 | 0.147165276 | 2.852866225 | 0.004332686 | 0.009559159 |
| Resf1    | 560.587145  | 0.41975004  | 0.156649028 | 2.679557267 | 0.007371959 | 0.015447045 |
| Coq2     | 570.973869  | 0.419608887 | 0.205117619 | 2.045698894 | 0.040786005 | 0.07061235  |
| Taf1a    | 207.1552527 | 0.419480368 | 0.197191742 | 2.127271474 | 0.033397534 | 0.059154405 |
| Kndc1    | 6.731811123 | 0.419379383 | 0.805819697 | 0.520438238 | 0.602758165 | 0.684507141 |
| Phkg2    | 673.3891655 | 0.41936396  | 0.217585702 | 1.927350724 | 0.053935936 | 0.090076395 |
| Tmbim4   | 972.3063041 | 0.419030936 | 0.105138188 | 3.985525559 | 6.73E-05    | 0.000209234 |
| Pcp4     | 1.211438954 | 0.418896589 | 1.695297464 | 0.247093267 | 0.804836044 | NA          |
| Dtwd2    | 54.42433177 | 0.418767726 | 0.258066236 | 1.622714123 | 0.104650531 | 0.160435071 |
| Naa16    | 214.8727715 | 0.418764209 | 0.184598646 | 2.268511807 | 0.02329803  | 0.043101988 |
| Bet1l    | 447.7285651 | 0.418572808 | 0.240027647 | 1.74385248  | 0.081184817 | 0.128879668 |
| Alg1     | 367.7223307 | 0.418557976 | 0.169140601 | 2.474615641 | 0.013337963 | 0.026211596 |
| Timm50   | 614.5860679 | 0.418451938 | 0.148660618 | 2.814813646 | 0.004880553 | 0.010633056 |
| Scamp3   | 751.6709902 | 0.418445161 | 0.223500483 | 1.872233815 | 0.061174263 | 0.100491312 |



|               |             |             |             |             |                |             |
|---------------|-------------|-------------|-------------|-------------|----------------|-------------|
| Hbp1          | 1389.469644 | 0.418290263 | 0.157033447 | 2.663701716 | 0.007728606    | 0.016115127 |
| Rtl3          | 0.718832576 | 0.418122226 | 1.95813     | 0.213531393 | 0.830912506 NA |             |
| Gdf9          | 5.784410452 | 0.417441915 | 1.210316637 | 0.344903063 | 0.730167248    | 0.793111898 |
| Znrf3         | 232.8223216 | 0.417266225 | 0.196966859 | 2.11845905  | 0.034136209    | 0.060296877 |
| Wdr11         | 660.1843571 | 0.417249658 | 0.13471936  | 3.097176649 | 0.001953734    | 0.004626651 |
| Gm49957       | 0.393049134 | 0.417220071 | 3.637033179 | 0.114714398 | 0.908671501 NA |             |
| Psmc1         | 2272.064697 | 0.416742201 | 0.172458043 | 2.416484573 | 0.01567119     | 0.03028366  |
| Zfp119b       | 72.68358639 | 0.416550606 | 0.253001891 | 1.646432773 | 0.09967469     | 0.153959783 |
| Rpl32l        | 0.387318218 | 0.416255514 | 3.269768634 | 0.127304271 | 0.89869958 NA  |             |
| Magoh         | 349.0249667 | 0.415924881 | 0.167472018 | 2.483548506 | 0.013008062    | 0.02562235  |
| Scyl1         | 936.3699752 | 0.415069868 | 0.135904303 | 3.054133366 | 0.002257117    | 0.00528127  |
| Gm15382       | 0.410741567 | 0.414661139 | 3.222380344 | 0.128681625 | 0.897609576 NA |             |
| Ercc6         | 459.5043471 | 0.414656089 | 0.315627579 | 1.313751132 | 0.188929968    | 0.264548508 |
| Tom1l1        | 335.5062697 | 0.414200242 | 0.194577639 | 2.128714504 | 0.033277888    | 0.059009927 |
| Chd1          | 548.4008603 | 0.41410546  | 0.363423331 | 1.139457555 | 0.254512362    | 0.339349816 |
| Psmc2         | 2726.26607  | 0.414087301 | 0.140995686 | 2.936879219 | 0.003315332    | 0.007499971 |
| Dis3l2        | 340.4672259 | 0.41407193  | 0.154804136 | 2.674811804 | 0.007477121    | 0.015650087 |
| 4930555K19Rik | 0.394431598 | 0.413873935 | 3.637020667 | 0.113794771 | 0.909400484 NA |             |
| Pus1          | 308.6051404 | 0.413462966 | 0.147480773 | 2.803504192 | 0.005055058    | 0.010983765 |
| C130074G19Rik | 3745.50455  | 0.41343977  | 0.216831571 | 1.906732348 | 0.056555256    | 0.093816678 |
| Thap2         | 234.7501426 | 0.413410497 | 0.226231464 | 1.827378428 | 0.06764289     | 0.109857673 |
| Gm14227       | 0.409643618 | 0.413339017 | 3.224891179 | 0.128171462 | 0.898013284 NA |             |
| Tubb4b        | 2787.726133 | 0.413301427 | 0.232722428 | 1.775941534 | 0.075742554    | 0.121199462 |
| Gm7069        | 0.495981174 | 0.4132657   | 3.063209598 | 0.134912642 | 0.892680944 NA |             |
| 0610010F05Rik | 241.807575  | 0.412983305 | 0.233546098 | 1.768316014 | 0.077008088    | 0.123028197 |
| Gpank1        | 163.7276232 | 0.412978762 | 0.205916865 | 2.005560653 | 0.044903143    | 0.076864564 |
| Gm43615       | 0.689471514 | 0.412820611 | 2.371290312 | 0.174091131 | 0.861793844 NA |             |
| Atg13         | 906.0079016 | 0.41275083  | 0.249441927 | 1.654697084 | 0.097985959    | 0.151722491 |
| Dhx29         | 204.2048644 | 0.412708024 | 0.222303552 | 1.856506659 | 0.063381375    | 0.10365749  |
| Nrgn          | 9.143094964 | 0.412458688 | 0.829023162 | 0.497523721 | 0.618819779    | 0.69861411  |
| Blvra         | 228.5752403 | 0.412371826 | 0.196761369 | 2.095796691 | 0.03610023     | 0.063329566 |
| Gm18852       | 8.276258738 | 0.412147242 | 1.263185511 | 0.3262761   | 0.744215469    | 0.804271652 |
| Gm3002        | 0.393591197 | 0.411962444 | 3.637013525 | 0.113269429 | 0.909816954 NA |             |
| Rnf214        | 361.6634636 | 0.411953928 | 0.188092029 | 2.19017217  | 0.028511753    | 0.051463035 |
| Polr2c        | 470.3412519 | 0.411877903 | 0.136449439 | 3.018538647 | 0.00253997     | 0.005876158 |
| Dnase1l2      | 29.23864237 | 0.411828069 | 0.467234991 | 0.881415299 | 0.37809308     | 0.47014203  |
| Tmem81        | 62.8464206  | 0.411660415 | 0.277899918 | 1.481326145 | 0.138519685    | 0.203435871 |
| Tmsb15a       | 0.361045884 | 0.411523959 | 3.278787232 | 0.125511029 | 0.900118994 NA |             |
| Rufy1         | 402.6197197 | 0.411495489 | 0.149620048 | 2.750269721 | 0.005954623    | 0.012730676 |
| Pdzd9         | 0.488546429 | 0.411353228 | 3.073662561 | 0.133831616 | 0.893535726 NA |             |
| Arap2         | 272.8739551 | 0.411292886 | 0.149838968 | 2.74489935  | 0.006052946    | 0.01292144  |
| Gm45224       | 0.415571991 | 0.411191563 | 3.213553206 | 0.127955424 | 0.89818425 NA  |             |
| Flii          | 999.6281423 | 0.411148846 | 0.156274672 | 2.630937188 | 0.008514977    | 0.017601956 |
| Lyar          | 221.0543718 | 0.411075453 | 0.211328783 | 1.945193866 | 0.05175165     | 0.08697379  |
| Olfr1269      | 14.12108881 | 0.410856651 | 0.490793169 | 0.837127893 | 0.402520684    | 0.495499503 |
| Helz2         | 2668.370014 | 0.410793621 | 0.214602626 | 1.91420594  | 0.055593847    | 0.092419688 |
| Zfp583        | 4.653987387 | 0.41075358  | 1.043724411 | 0.393546012 | 0.693916247    | 0.763119867 |
| Gm5105        | 0.495597202 | 0.410554219 | 3.063500781 | 0.134014726 | 0.89339093 NA  |             |
| Gm21961       | 0.419950772 | 0.410444004 | 3.637007853 | 0.112852108 | 0.910147806 NA |             |
| Olfr839-ps1   | 26.67537131 | 0.41040671  | 0.451917692 | 0.908144818 | 0.363801714    | 0.456136767 |
| Ubxn6         | 791.4809828 | 0.410119374 | 0.208186629 | 1.969960202 | 0.048842932    | 0.082754353 |
| Nkap          | 181.9592871 | 0.410070185 | 0.201635139 | 2.033723822 | 0.041979449    | 0.072384509 |
| Zfp420        | 75.02168978 | 0.410049482 | 0.257439323 | 1.5928005   | 0.111204953    | 0.169133913 |
| Smim12        | 238.1711553 | 0.409992281 | 0.162041242 | 2.530172411 | 0.011400649    | 0.022857611 |
| Tcea1         | 1118.447242 | 0.409964761 | 0.132080287 | 3.103905736 | 0.001909842    | 0.004532783 |
| Ndufaf7       | 295.965504  | 0.409868661 | 0.181199469 | 2.261974956 | 0.023698951    | 0.043701429 |
| Rbm25         | 1831.498097 | 0.409846602 | 0.183737811 | 2.230605661 | 0.025707262    | 0.046927351 |
| Gm18026       | 0.710037964 | 0.409480907 | 2.406143077 | 0.170181446 | 0.864867443 NA |             |
| 2610507B11Rik | 2464.213145 | 0.409243486 | 0.140779116 | 2.90699003  | 0.003649248    | 0.008177232 |
| Fas           | 299.9635939 | 0.409109034 | 0.176808931 | 2.313848242 | 0.020676048    | 0.038708055 |
| Lefty2        | 0.488198682 | 0.408865926 | 3.073938213 | 0.133010457 | 0.894185111 NA |             |
| Gm6377        | 35.52692341 | 0.408802395 | 0.404511003 | 1.010608838 | 0.312203684    | 0.403185244 |
| Stau1         | 1612.56727  | 0.408684364 | 0.170638298 | 2.39503305  | 0.016618867    | 0.0318801   |
| 3000002C10Rik | 47.34109668 | 0.408436536 | 0.395701827 | 1.032182588 | 0.30198659     | 0.391860815 |
| Macroh2a1     | 1468.410158 | 0.408336132 | 0.146259553 | 2.791859572 | 0.005240609    | 0.011343564 |
| Gm8206        | 0.872267594 | 0.408280762 | 2.34272683  | 0.174275872 | 0.86164866 NA  |             |

|               |             |             |             |             |                |             |
|---------------|-------------|-------------|-------------|-------------|----------------|-------------|
| Dll1          | 113.886491  | 0.408246681 | 0.355005405 | 1.149973142 | 0.250154933    | 0.334534147 |
| Kmt2e         | 1089.315989 | 0.408197218 | 0.239738869 | 1.70267433  | 0.088629031    | 0.139360609 |
| Gm47993       | 0.393368308 | 0.408109483 | 3.257551587 | 0.12528105  | 0.900301054 NA |             |
| Gm18881       | 0.485279432 | 0.407963412 | 3.078099027 | 0.132537455 | 0.894559199 NA |             |
| Rab18         | 1567.344059 | 0.407953336 | 0.118851785 | 3.432454419 | 0.000598144    | 0.001575338 |
| Gins4         | 249.4666857 | 0.407766311 | 0.199632632 | 2.042583451 | 0.041093691    | 0.071072866 |
| Gm11808       | 6147.173699 | 0.407712923 | 0.162047326 | 2.516011424 | 0.011869134    | 0.02365778  |
| Afg3l1        | 941.7761414 | 0.407482228 | 0.162941464 | 2.500789361 | 0.012391686    | 0.024575786 |
| Pank4         | 282.6356543 | 0.407439371 | 0.163136031 | 2.497543725 | 0.012505704    | 0.024773094 |
| Ercc6l2       | 288.8089884 | 0.407336652 | 0.21595166  | 1.88623997  | 0.059262625    | 0.097737179 |
| Gm15667       | 0.387006894 | 0.407036115 | 3.270936293 | 0.124440245 | 0.90096671 NA  |             |
| Atp2c1        | 597.1657275 | 0.406985906 | 0.168591034 | 2.414042413 | 0.015776626    | 0.030466687 |
| Phgr1         | 0.39930794  | 0.40691826  | 3.245767153 | 0.125368901 | 0.900231507 NA |             |
| Tm2d3         | 351.7293209 | 0.406577109 | 0.234969234 | 1.730341892 | 0.083569209    | 0.132295281 |
| Sox1          | 0.477951812 | 0.406553789 | 3.088784656 | 0.131622575 | 0.895282829 NA |             |
| Taf3          | 127.7202728 | 0.406241092 | 0.292381068 | 1.38942338  | 0.164704045    | 0.235398495 |
| Gm12990       | 0.400288478 | 0.406233917 | 3.243505792 | 0.125245319 | 0.90032934 NA  |             |
| Anxa10        | 0.40939515  | 0.406177297 | 3.225733565 | 0.125917807 | 0.899796987 NA |             |
| Tldc2         | 0.399290789 | 0.40600357  | 3.245848995 | 0.125083937 | 0.9004571 NA   |             |
| Adgra3        | 525.1185866 | 0.406000487 | 0.223992013 | 1.812566802 | 0.069898662    | 0.113004494 |
| Arl6ip4       | 519.8087591 | 0.405903074 | 0.154946912 | 2.619626747 | 0.008802605    | 0.018100167 |
| Gm49288       | 0.392219321 | 0.405892958 | 3.260375508 | 0.124492703 | 0.900925178 NA |             |
| Gm12013       | 0.47798618  | 0.405829507 | 3.088668887 | 0.131393012 | 0.895464417 NA |             |
| Dclre1c       | 243.7260515 | 0.405823201 | 0.262733819 | 1.544617297 | 0.12243886     | 0.183437708 |
| CR974586.2    | 0.393195215 | 0.405792858 | 3.258033575 | 0.124551466 | 0.900878654 NA |             |
| Gm7588        | 0.481598615 | 0.405773701 | 3.636990423 | 0.111568537 | 0.91116552 NA  |             |
| Pomt1         | 333.4581919 | 0.405764116 | 0.164899051 | 2.460681934 | 0.013867324    | 0.027129923 |
| Psme4         | 1592.809493 | 0.405739463 | 0.181543488 | 2.234943638 | 0.025421049    | 0.046480502 |
| Meaf6         | 223.8133741 | 0.405586036 | 0.175804131 | 2.307033587 | 0.021052948    | 0.03934561  |
| Gm15697       | 1.211578995 | 0.405547289 | 1.695471019 | 0.239194468 | 0.810954792 NA |             |
| Stx5a         | 1048.153642 | 0.405082969 | 0.189247766 | 2.140490095 | 0.03231518     | 0.057500177 |
| Gm10509       | 1.343443796 | 0.404988794 | 1.619720896 | 0.25003616  | 0.802559385 NA |             |
| Epas1         | 2156.807577 | 0.404748241 | 0.213487396 | 1.895888232 | 0.057974825    | 0.095928838 |
| Hnmt          | 444.9071641 | 0.40470699  | 0.184898347 | 2.188808049 | 0.028610794    | 0.051619941 |
| Lyst          | 405.3974683 | 0.404633022 | 0.381053725 | 1.061879192 | 0.288290533    | 0.377073577 |
| Vmn1r19       | 0.409301282 | 0.404435604 | 3.226003193 | 0.125367391 | 0.900232703 NA |             |
| 2700097O09Rik | 205.0017511 | 0.404405538 | 0.233827357 | 1.72950481  | 0.083718786    | 0.132507462 |
| Pnoc          | 0.415436422 | 0.404346473 | 3.214145267 | 0.125802177 | 0.899888518 NA |             |
| Edem3         | 638.5457901 | 0.404276227 | 0.219892435 | 1.838518129 | 0.065986093    | 0.107381721 |
| Tmem212       | 0.392097466 | 0.404245191 | 3.260716016 | 0.123974363 | 0.901335574 NA |             |
| Sel1l3        | 296.3203368 | 0.404078742 | 0.162345093 | 2.489011123 | 0.012809896    | 0.025290458 |
| Gm8513        | 0.399254047 | 0.403791237 | 3.246037007 | 0.124395143 | 0.901002419 NA |             |
| Ebna1bp2      | 531.4486554 | 0.403674231 | 0.215376645 | 1.874271144 | 0.060893063    | 0.100096898 |
| Lag3          | 40.47336929 | 0.403497783 | 0.363982002 | 1.108565207 | 0.267617795    | 0.353834975 |
| Gm8543        | 0.399248748 | 0.403456431 | 3.246064891 | 0.124290932 | 0.901084927 NA |             |
| Cyp2d11       | 22.38749302 | 0.403324676 | 0.534685146 | 0.754321827 | 0.450655999    | 0.541743943 |
| Ankrd22       | 0.400245188 | 0.403098337 | 3.243755242 | 0.124269036 | 0.901102263 NA |             |
| Olfr279       | 9.542245124 | 0.402892    | 0.578384915 | 0.696581099 | 0.486064988    | 0.57633128  |
| Gm8659        | 0.392060204 | 0.402874521 | 3.260865696 | 0.123548333 | 0.901672903 NA |             |
| Gm9678        | 0.400242378 | 0.402831921 | 3.243774641 | 0.124186161 | 0.901167879 NA |             |
| Mocs3         | 135.3960853 | 0.402746407 | 0.261166299 | 1.542107108 | 0.123047568    | 0.184220158 |
| A430033K04Rik | 113.2707117 | 0.402639743 | 0.226171761 | 1.780238797 | 0.075036888    | 0.120216979 |
| Gm48012       | 0.400240303 | 0.402628336 | 3.243789312 | 0.124122838 | 0.901218016 NA |             |
| Igfn1         | 0.171271874 | 0.402615662 | 3.632156579 | 0.110847551 | 0.911737237 NA |             |
| Tubb4b-ps2    | 0.400239895 | 0.402589051 | 3.243792158 | 0.124110619 | 0.901227691 NA |             |
| Ctu2          | 212.1057086 | 0.402465349 | 0.259497744 | 1.550939683 | 0.120916139    | 0.181507295 |
| Pcdhb11       | 2.216401279 | 0.402072662 | 1.431786384 | 0.280818889 | 0.778849315    | 0.832726442 |
| Cln8          | 482.0752271 | 0.401880091 | 0.212160303 | 1.894228495 | 0.058194687    | 0.096236592 |
| Naca          | 4394.6141   | 0.401758573 | 0.123356309 | 3.256895234 | 0.00112638     | 0.002811497 |
| Arhgef10l     | 684.7371066 | 0.401719738 | 0.206415308 | 1.946172221 | 0.051634056    | 0.086801832 |
| Unc5d         | 9.60663511  | 0.401686732 | 0.73727378  | 0.544827096 | 0.585872441    | 0.668940685 |
| Dtx3l         | 655.1974546 | 0.401576869 | 0.283619331 | 1.41590091  | 0.156804519    | 0.226140211 |
| Gm14686       | 3.20474933  | 0.401484363 | 1.22101262  | 0.328812624 | 0.742297321    | 0.802758483 |
| Rsrc2         | 755.6011836 | 0.401400273 | 0.201004188 | 1.996974681 | 0.045827934    | 0.078291874 |
| Gm12854       | 0.42123227  | 0.401269315 | 3.636973631 | 0.110330554 | 0.912147227 NA |             |
| Ascc3         | 343.4599439 | 0.400958615 | 0.224196404 | 1.788425714 | 0.073707351    | 0.118387311 |

|               |             |             |             |             |             |             |
|---------------|-------------|-------------|-------------|-------------|-------------|-------------|
| Mysm1         | 362.7715925 | 0.400927614 | 0.159978076 | 2.506140987 | 0.012205694 | 0.024240758 |
| Cxcl12        | 4719.98193  | 0.400531755 | 0.168878543 | 2.371714893 | 0.017705747 | 0.033741066 |
| Rad54l2       | 738.1417074 | 0.400529433 | 0.204123035 | 1.962196143 | 0.049739653 | 0.083989858 |
| Ndst2         | 504.9770094 | 0.400381347 | 0.214451061 | 1.867005671 | 0.061900796 | 0.101557576 |
| Ccnb1ip1      | 164.7751181 | 0.400344661 | 1.041571024 | 0.384366166 | NA          | NA          |
| Rpl21-ps10    | 0.706080098 | 0.399847926 | 2.365364893 | 0.169042809 | 0.865762969 | NA          |
| Dhx33         | 438.4205681 | 0.399846949 | 0.186235552 | 2.146995804 | 0.031793616 | 0.056732003 |
| Ngdn          | 350.1751877 | 0.399628906 | 0.227728043 | 1.754851538 | 0.079284705 | 0.126251229 |
| Lin37         | 160.7808771 | 0.399627761 | 0.242439706 | 1.648359371 | 0.099278948 | 0.15344583  |
| Gaa           | 1405.102406 | 0.399461481 | 0.166577377 | 2.398053609 | 0.016482453 | 0.031664735 |
| Sms           | 129.7952913 | 0.399367201 | 0.397006241 | 1.005946908 | 0.31444111  | 0.405644498 |
| Ankrd24       | 152.2375997 | 0.39931852  | 0.227401737 | 1.756004702 | 0.079087606 | 0.125991109 |
| Maml3         | 87.74191619 | 0.399194207 | 0.240740908 | 1.658190166 | 0.097279089 | 0.150819744 |
| Gm45808       | 4.831682703 | 0.399014298 | 1.845938715 | 0.216157933 | 0.828864643 | 0.872952643 |
| Akr1d1        | 2977.658187 | 0.398789947 | 0.331153281 | 1.2042458   | 0.228494589 | 0.31053697  |
| Pnp           | 1562.152696 | 0.398777799 | 0.184023119 | 2.166998367 | 0.030234979 | 0.054160546 |
| Zfp318        | 486.6218596 | 0.398689695 | 0.258638158 | 1.541496034 | 0.123196107 | 0.184426347 |
| Sult3a1       | 0.395038602 | 0.398607475 | 3.636963717 | 0.109598969 | 0.912727428 | NA          |
| Gcdc174       | 198.4472799 | 0.398536967 | 0.191010408 | 2.086467281 | 0.036936316 | 0.064683135 |
| Gm5469        | 0.395062628 | 0.398393414 | 3.63696292  | 0.109540136 | 0.912774089 | NA          |
| Sytl1         | 153.5936295 | 0.398116009 | 0.384202082 | 1.036215126 | 0.300101792 | 0.389741399 |
| Plcl2         | 264.5067971 | 0.397999723 | 0.219611364 | 1.812291115 | 0.069941227 | 0.113062586 |
| Zc3h18        | 941.713028  | 0.397794727 | 0.156233623 | 2.546153122 | 0.01089174  | 0.021917184 |
| Nptn          | 924.5473461 | 0.397747389 | 0.191882573 | 2.072868752 | 0.038184496 | 0.066629405 |
| Asb18         | 12.59300148 | 0.397559358 | 0.633376867 | 0.627682157 | 0.530212176 | 0.618012934 |
| Naa15         | 619.4678347 | 0.397489934 | 0.174564298 | 2.277040259 | 0.022783822 | 0.042237776 |
| Adgrl2        | 682.2210647 | 0.39739315  | 0.176140439 | 2.256115363 | 0.024063407 | 0.04429205  |
| Tmem223       | 397.8848007 | 0.39721222  | 0.180027855 | 2.20639312  | 0.027356486 | 0.049624748 |
| Phlpp1        | 399.2794434 | 0.397154666 | 0.187475298 | 2.118437308 | 0.034138049 | 0.060296877 |
| Fig4          | 244.9081759 | 0.396776122 | 0.161920153 | 2.450443096 | 0.014268051 | 0.027837233 |
| Trappc11      | 630.3625191 | 0.396642411 | 0.184206663 | 2.153246818 | 0.031299286 | 0.055914306 |
| Gtf2a2        | 696.0169453 | 0.396632812 | 0.199823952 | 1.984911259 | 0.047154346 | 0.080268326 |
| Fam214b       | 383.2946732 | 0.396630308 | 0.20064626  | 1.976764017 | 0.048068311 | 0.081604119 |
| Gm37108       | 1.084024804 | 0.396403756 | 1.986564946 | 0.199542309 | 0.841838551 | NA          |
| Tmem189       | 232.2543661 | 0.39627899  | 0.224726865 | 1.763380584 | 0.077836322 | 0.124211703 |
| Ephx1         | 9579.323014 | 0.396215307 | 0.201335089 | 1.967939661 | 0.049074981 | 0.083056713 |
| Ccm2l         | 94.36641123 | 0.396127837 | 0.222912017 | 1.777059142 | 0.07555851  | 0.120960483 |
| Adam1a        | 47.997259   | 0.395929872 | 0.349217432 | 1.133763198 | 0.256893892 | 0.341830087 |
| Chmp5         | 758.9195734 | 0.39586792  | 0.176710923 | 2.240200619 | 0.025077902 | 0.045936184 |
| Xpot          | 1398.929413 | 0.395852849 | 0.168911672 | 2.343549401 | 0.019101232 | 0.03608975  |
| Zdhxc4        | 316.8279945 | 0.395847818 | 0.168921988 | 2.343376513 | 0.019110087 | 0.036102478 |
| Nubp2         | 459.3079298 | 0.395686907 | 0.181382881 | 2.181500842 | 0.029146392 | 0.052425374 |
| Defa17        | 0.375486333 | 0.39555454  | 3.636952354 | 0.108759891 | 0.913392938 | NA          |
| Abhd16a       | 681.0112914 | 0.395494694 | 0.148046694 | 2.671418606 | 0.007553139 | 0.015789811 |
| Gm38393       | 13.68487933 | 0.395355711 | 0.515391398 | 0.767098002 | 0.44302325  | 0.534096624 |
| Nipa2         | 499.1653956 | 0.395124506 | 0.182940643 | 2.159850862 | 0.030784217 | 0.055074963 |
| Hspa9-ps1     | 0.396468122 | 0.394954473 | 3.636950121 | 0.108594966 | 0.913523754 | NA          |
| Hax1          | 1122.173335 | 0.394902873 | 0.155186682 | 2.544695643 | 0.010937302 | 0.021998482 |
| Gm15750       | 0.40882089  | 0.394753197 | 3.636949373 | 0.108539646 | 0.913567633 | NA          |
| Gm3375        | 0.494015313 | 0.39441503  | 3.636948115 | 0.108446702 | 0.913641356 | NA          |
| Polr1d        | 862.7409758 | 0.393916456 | 0.119710784 | 3.290567826 | 0.000999854 | 0.002521152 |
| Hcfc2         | 220.160346  | 0.393796535 | 0.172138688 | 2.287670134 | 0.022156738 | 0.041200706 |
| Taf1          | 425.5666605 | 0.393784041 | 0.23895584  | 1.647936458 | 0.099365711 | 0.153538171 |
| Ttc1          | 338.372437  | 0.393775616 | 0.153462467 | 2.565940872 | 0.010289637 | 0.020837468 |
| Gm12889       | 0.40895128  | 0.393736494 | 3.636945591 | 0.10826021  | 0.913789285 | NA          |
| Raf1          | 1963.250825 | 0.393481386 | 0.182911214 | 2.151215211 | 0.031459217 | 0.056170583 |
| A530084C06Rik | 10.46909829 | 0.39346931  | 0.666404098 | 0.59043651  | 0.554898039 | 0.640047482 |
| Olfrr1340     | 2.049841279 | 0.393350783 | 1.465251383 | 0.268452764 | 0.78835083  | 0.840250387 |
| Cfdp1         | 825.6834615 | 0.393273372 | 0.196156766 | 2.004893228 | 0.044974463 | 0.076962589 |
| Gm47006       | 0.494047777 | 0.393184266 | 3.636943538 | 0.108108433 | 0.913909679 | NA          |
| Atxn7         | 546.4458575 | 0.393173127 | 0.160981473 | 2.442350169 | 0.014591985 | 0.028404221 |
| Tmem201       | 359.6338771 | 0.393008198 | 0.166730669 | 2.357144014 | 0.018416103 | 0.034919111 |
| Ptp4a2        | 2228.641662 | 0.393006754 | 0.144979662 | 2.710771617 | 0.006712684 | 0.014182407 |
| Gm17082       | 0.375722982 | 0.392946366 | 3.636942653 | 0.108043047 | 0.913961546 | NA          |
| Cnep1r1       | 349.6997408 | 0.392705082 | 0.185043297 | 2.122233491 | 0.033818135 | 0.059793774 |
| Gm17875       | 0.376772848 | 0.392543845 | 3.636941156 | 0.107932416 | 0.914049303 | NA          |



|               |             |             |             |             |                |             |
|---------------|-------------|-------------|-------------|-------------|----------------|-------------|
| Casp9         | 375.0064102 | 0.392533457 | 0.163935876 | 2.394432914 | 0.016646088    | 0.031914363 |
| Slco6c1       | 0.408094118 | 0.392527569 | 3.636941096 | 0.107927942 | 0.914052852 NA |             |
| Gcm2          | 0.494066438 | 0.392494648 | 3.636940973 | 0.107918894 | 0.914060029 NA |             |
| Hcar1         | 0.508474326 | 0.392480284 | 3.63694092  | 0.107914946 | 0.914063161 NA |             |
| Mixl1         | 0.409116972 | 0.392451321 | 3.636940812 | 0.107906986 | 0.914069475 NA |             |
| Gm5703        | 0.422519693 | 0.392399725 | 3.636940621 | 0.107892805 | 0.914080725 NA |             |
| Olfr566       | 0.375774783 | 0.392380796 | 3.63694055  | 0.107887602 | 0.914084852 NA |             |
| Habp2         | 3107.828761 | 0.392329272 | 0.207346929 | 1.892139295 | 0.058472424    | 0.09663964  |
| Trim31        | 0.375780041 | 0.3923235   | 3.636940337 | 0.107871855 | 0.914097343 NA |             |
| Adh6b         | 4.703774366 | 0.392290547 | 0.923571214 | 0.424753978 | 0.67101603     | 0.743499369 |
| Krt6b         | 0.461729688 | 0.392260356 | 3.636940102 | 0.1078545   | 0.914111111 NA |             |
| Kcna5         | 0.375790239 | 0.39221242  | 3.636939924 | 0.107841325 | 0.914121562 NA |             |
| Scn4b         | 0.494075236 | 0.392173766 | 3.636939781 | 0.107830701 | 0.914129989 NA |             |
| Gm3696        | 0.376807048 | 0.392166124 | 3.636939752 | 0.107828601 | 0.914131655 NA |             |
| Brms1         | 401.9817448 | 0.39215105  | 0.161456409 | 2.428835442 | 0.015147406    | 0.029364677 |
| Olfr403       | 0.375796502 | 0.392144227 | 3.636939671 | 0.107822582 | 0.914136429 NA |             |
| Otop3         | 0.37681476  | 0.39208107  | 3.636939436 | 0.107805224 | 0.914150199 NA |             |
| Gm6264        | 1.059918225 | 0.392041711 | 2.194128616 | 0.178677635 | 0.858190832 NA |             |
| Herpud2       | 518.3364116 | 0.391669277 | 0.128434794 | 3.049557416 | 0.002291788    | 0.005355045 |
| Tmem115       | 410.8666939 | 0.391347842 | 0.132057899 | 2.96345652  | 0.00304205     | 0.006929566 |
| Npm2          | 4.181381171 | 0.39108749  | 1.021516586 | 0.382849868 | 0.701831084    | 0.769293147 |
| Mettl9        | 834.1297642 | 0.390996771 | 0.206341977 | 1.894896891 | 0.058106063    | 0.096118005 |
| Rprd2         | 451.3604303 | 0.390975726 | 0.198936106 | 1.965333156 | 0.049375691    | 0.083457939 |
| Klhdc4        | 336.1957819 | 0.39072692  | 0.189638392 | 2.060378779 | 0.039362344    | 0.068453457 |
| Lsmem1        | 3.430538327 | 0.390293984 | 1.240550541 | 0.314613529 | 0.753055106    | 0.811509699 |
| Msl2          | 430.2535213 | 0.390238785 | 0.15016277  | 2.598771892 | 0.009355792    | 0.019124406 |
| Eif3i         | 1115.951372 | 0.389961994 | 0.190617409 | 2.045783734 | 0.040777653    | 0.070605061 |
| Gpam          | 1025.181752 | 0.389895875 | 0.239899645 | 1.625245734 | 0.104110209    | 0.159725598 |
| Slc11a2       | 566.2933545 | 0.389841164 | 0.189296517 | 2.059420693 | 0.039453955    | 0.068584789 |
| Praf2         | 75.11119431 | 0.389723973 | 0.341341188 | 1.141743177 | 0.253560788    | 0.338345673 |
| Cldn1         | 1374.630766 | 0.389345794 | 0.349564567 | 1.113802228 | 0.265364041    | 0.351209236 |
| Gm3222        | 1.759549062 | 0.389289927 | 1.657631618 | 0.234847069 | 0.814327434    | 0.861206829 |
| Gm10271       | 0.485584152 | 0.389136264 | 3.075917904 | 0.126510614 | 0.899327748 NA |             |
| 1700028K03Rik | 3.500777857 | 0.389000163 | 1.141554703 | 0.340763489 | 0.733281639    | 0.795505837 |
| Clns1a        | 485.0263044 | 0.38899094  | 0.159469329 | 2.439283732 | 0.014716408    | 0.028610484 |
| Elmod2        | 263.7083983 | 0.388822046 | 0.178090836 | 2.183279351 | 0.029015244    | 0.052233567 |
| Olfr1438-ps1  | 13.41487324 | 0.388759422 | 0.530035307 | 0.733459483 | 0.463278231    | 0.553777938 |
| Gm13323       | 6.795914264 | 0.388701257 | 0.719684315 | 0.540099664 | 0.589128302    | 0.672118001 |
| Vps29         | 588.2802668 | 0.388199405 | 0.152087158 | 2.55247984  | 0.01069591     | 0.021553649 |
| Dph5          | 155.3958238 | 0.388079103 | 0.21906071  | 1.771559597 | 0.076467692    | 0.122279449 |
| Gm6483        | 12.89722383 | 0.388013693 | 0.525738381 | 0.738035698 | 0.460492757    | 0.551065599 |
| Dcaf8         | 2829.146768 | 0.387836312 | 0.142541221 | 2.720871257 | 0.006511011    | 0.013797355 |
| Gm38356       | 27.90759374 | 0.387586636 | 0.4647597   | 0.833950611 | 0.404308816    | 0.497127342 |
| Rfc5          | 178.8127093 | 0.387477563 | 0.278435018 | 1.391626549 | 0.164035515    | 0.234623497 |
| Aplf          | 66.13878355 | 0.387287689 | 0.258117805 | 1.500429965 | 0.133503062    | 0.197441519 |
| Emsy          | 385.4498332 | 0.387123493 | 0.17560984  | 2.204452172 | 0.02749256     | 0.049823872 |
| Ciapi1        | 549.9837427 | 0.387050851 | 0.224168416 | 1.726607424 | 0.084238192    | 0.133205889 |
| Rnf223        | 1.407183125 | 0.386501674 | 1.538764671 | 0.251176597 | 0.801677577 NA |             |
| Gm17137       | 1.5433381   | 0.386426368 | 1.387657643 | 0.278473851 | 0.780648635 NA |             |
| Lims2         | 1623.800876 | 0.386411176 | 0.147102634 | 2.626813438 | 0.008618857    | 0.017773591 |
| Cacnb2        | 3.657053881 | 0.386351817 | 1.101523763 | 0.350743061 | 0.725781117    | 0.789403884 |
| Gm42417       | 5.359314336 | 0.386120344 | 3.366741025 | 0.114686678 | 0.908693474    | 0.932767723 |
| Copb2         | 2199.864939 | 0.385859657 | 0.126293106 | 3.055270949 | 0.002248573    | 0.005263151 |
| Tmem106b      | 2368.487244 | 0.385709284 | 0.157788401 | 2.444471718 | 0.014506445    | 0.028263529 |
| Hist1h4m      | 2.430452986 | 0.38562121  | 1.488513917 | 0.259064565 | 0.795585425    | 0.846056878 |
| Sidt2         | 1939.063646 | 0.385407652 | 0.160066136 | 2.407802562 | 0.016048858    | 0.030929338 |
| Prpf39        | 893.3350451 | 0.38532739  | 0.236653133 | 1.628237013 | 0.103474639    | 0.158914073 |
| Cog6          | 344.96883   | 0.385317776 | 0.169972157 | 2.266946445 | 0.023393497    | 0.04322232  |
| Exoc3l        | 86.95349795 | 0.385313469 | 0.243508696 | 1.582339665 | 0.11357205     | 0.172242355 |
| Qrs1l         | 109.7665463 | 0.384854807 | 0.2380669   | 1.616582595 | 0.105968411    | 0.162051442 |
| Cfap97        | 190.645803  | 0.384824594 | 0.170548676 | 2.256391563 | 0.02404612     | 0.044279353 |
| Pthrhd1       | 109.6369158 | 0.384753861 | 0.231620469 | 1.66113929  | 0.096685475    | 0.150035862 |
| Mrgprg        | 0.747139727 | 0.384713362 | 2.867873079 | 0.134145881 | 0.893287219 NA |             |
| Prdm2         | 645.2503107 | 0.384577911 | 0.244057192 | 1.575769627 | 0.115078905    | 0.174186732 |
| Brd2          | 2248.712206 | 0.384550686 | 0.190422548 | 2.019459825 | 0.043439449    | 0.07464527  |
| Zfp361l       | 4457.951302 | 0.38454976  | 0.163852538 | 2.346925875 | 0.01892902     | 0.035784202 |

|               |             |             |             |             |             |             |
|---------------|-------------|-------------|-------------|-------------|-------------|-------------|
| Asb3          | 161.7612582 | 0.384430544 | 0.190443524 | 2.018606546 | 0.04352813  | 0.074782582 |
| Gm48641       | 2.685553325 | 0.384290272 | 1.026390847 | 0.374409293 | 0.70809983  | 0.774223057 |
| Frg1          | 333.7845073 | 0.384079859 | 0.159677666 | 2.405344891 | 0.016157209 | 0.031113532 |
| Pla2g12a      | 372.3979105 | 0.384038447 | 0.208145342 | 1.845049444 | 0.065030347 | 0.106069398 |
| Sys1          | 544.9686112 | 0.383849485 | 0.220736454 | 1.738949219 | 0.082043696 | 0.130097751 |
| Wipi1         | 440.850633  | 0.383690369 | 0.159527141 | 2.405172975 | 0.016164813 | 0.031124658 |
| Gnpnat1       | 1278.038623 | 0.383676195 | 0.1265845   | 3.030988756 | 0.002437543 | 0.00566302  |
| Gsk3a         | 1135.993742 | 0.383617288 | 0.111152671 | 3.451264677 | 0.000557966 | 0.001478658 |
| Rbm4          | 221.3344312 | 0.383525554 | 0.350066546 | 1.095578994 | 0.273263058 | 0.359986757 |
| Sh3pxd2a      | 672.7326655 | 0.383370609 | 0.218480649 | 1.754711966 | 0.079308588 | 0.126275693 |
| Caap1         | 89.30990217 | 0.383363488 | 0.238545139 | 1.607089917 | 0.108034645 | 0.164871061 |
| Urgcp         | 422.8998913 | 0.383335858 | 0.194384907 | 1.972045382 | 0.048604426 | 0.082407584 |
| Nploc4        | 1017.702266 | 0.383001808 | 0.169352343 | 2.261567816 | 0.023724118 | 0.043738377 |
| Hus1b         | 0.717682893 | 0.382983461 | 2.405066705 | 0.159240266 | 0.873479581 | NA          |
| HnrnpH2       | 925.2147348 | 0.382554938 | 0.190518624 | 2.007966097 | 0.044646894 | 0.076458087 |
| Ccnt2         | 975.3372871 | 0.382334045 | 0.146707756 | 2.606092929 | 0.009158161 | 0.018749649 |
| Serpina6      | 3256.025102 | 0.382237008 | 0.38614017  | 0.989891852 | 0.322226983 | 0.413591748 |
| Zfp65         | 117.2235836 | 0.382218619 | 0.238207427 | 1.60456214  | 0.108590199 | 0.165629928 |
| Syde2         | 75.68987715 | 0.382187629 | 0.463804569 | 0.824027305 | 0.409924043 | 0.502183465 |
| Mrp40         | 438.608676  | 0.382156839 | 0.163501285 | 2.337332332 | 0.019421911 | 0.036630682 |
| Ppargc1a      | 173.7777643 | 0.381685228 | 0.330576947 | 1.154603283 | 0.248252922 | 0.332329471 |
| Ppil2         | 864.5678389 | 0.38155733  | 0.154744184 | 2.465729698 | 0.013673447 | 0.026784434 |
| Rnf169        | 1238.06969  | 0.381484097 | 0.225650936 | 1.690593906 | 0.090914389 | 0.142467921 |
| Nup54         | 365.2243332 | 0.381332767 | 0.194979167 | 1.955761593 | 0.050493245 | 0.085135876 |
| Fam160b1      | 844.7149624 | 0.381153417 | 0.191506511 | 1.990289593 | 0.046559044 | 0.079342121 |
| Taok2         | 1269.357561 | 0.381003884 | 0.145268815 | 2.622750678 | 0.008722308 | 0.017956614 |
| Ggps1         | 278.7125562 | 0.380838405 | 0.210832737 | 1.806353271 | 0.070863176 | 0.114336118 |
| Stambp        | 309.3133615 | 0.380432251 | 0.21385981  | 1.77888614  | 0.075258431 | 0.12053793  |
| Nr3c1         | 1110.100625 | 0.38038683  | 0.134643166 | 2.825147688 | 0.004725883 | 0.010326435 |
| Baz2b         | 511.2001497 | 0.380344403 | 0.143750003 | 2.645874056 | 0.008148015 | 0.016904875 |
| Tbcb          | 505.9504604 | 0.380175954 | 0.15206143  | 2.500147167 | 0.012414172 | 0.024617519 |
| Copz2         | 303.0948655 | 0.380023273 | 0.173831054 | 2.186164468 | 0.028803575 | 0.05190733  |
| Rpl27a        | 2608.886993 | 0.380000687 | 0.164305929 | 2.312763082 | 0.020735669 | 0.038807957 |
| Fam114a2      | 685.3515012 | 0.379806086 | 0.140078594 | 2.711378484 | 0.00670041  | 0.014159983 |
| Zdhhc18       | 486.1374142 | 0.379722261 | 0.252875264 | 1.501618845 | 0.133195574 | 0.197025435 |
| Elob          | 1659.036786 | 0.379551243 | 0.166303317 | 2.282283062 | 0.022472634 | 0.041701694 |
| Las1l         | 594.5940745 | 0.379425626 | 0.163856644 | 2.315595    | 0.020580392 | 0.038555442 |
| Rasa1         | 412.7871289 | 0.37939453  | 0.18296372  | 2.073605247 | 0.038115988 | 0.066530291 |
| Ripor2        | 71.63757857 | 0.37927448  | 0.365095738 | 1.038835682 | 0.298881163 | 0.388392871 |
| Gm17952       | 1.748982894 | 0.379188899 | 1.411798994 | 0.268585614 | 0.788248584 | 0.840193939 |
| 1700067K01Rik | 4.732385783 | 0.379060951 | 0.967374517 | 0.391845087 | 0.695172679 | 0.764164343 |
| Ebag9         | 340.9723045 | 0.378737605 | 0.156987026 | 2.412540801 | 0.015841764 | 0.030585549 |
| Trpc7         | 0.728491672 | 0.378290625 | 2.14098024  | 0.176690386 | 0.859751593 | NA          |
| Txndc11       | 566.2466503 | 0.378255846 | 0.221341059 | 1.708927606 | 0.08746436  | 0.137732534 |
| Rad17         | 221.0594205 | 0.378156875 | 0.195812175 | 1.931222488 | 0.053455544 | 0.08937918  |
| Gm16415       | 0.365883935 | 0.378144913 | 3.265279969 | 0.115807807 | 0.907804863 | NA          |
| Gtf2f2        | 182.4134831 | 0.378100097 | 0.19835443  | 1.906184281 | 0.056626301 | 0.093914056 |
| Rbm10         | 588.0975388 | 0.377865956 | 0.144716523 | 2.611076805 | 0.009025762 | 0.018516389 |
| Olfir73       | 1.708530867 | 0.377679592 | 1.283127584 | 0.294342976 | 0.768495836 | 0.824293256 |
| Socs4         | 412.4035434 | 0.3774297   | 0.143537299 | 2.629488664 | 0.008551338 | 0.017662129 |
| Atp6v1e1      | 1427.633592 | 0.377361033 | 0.122598721 | 3.078017687 | 0.002083825 | 0.004909488 |
| Fth-ps2       | 0.365837708 | 0.377179312 | 3.265359403 | 0.115509279 | 0.908041466 | NA          |
| Gm13675       | 0.365817213 | 0.376750794 | 3.265395261 | 0.115376781 | 0.908146482 | NA          |
| Srrm4         | 178.2153523 | 0.376730597 | 0.271224026 | 1.389001568 | 0.164832273 | 0.235506252 |
| Gm8451        | 0.355039699 | 0.376471043 | 3.296513203 | 0.114202802 | 0.909077031 | NA          |
| Nsun5         | 190.7523105 | 0.376395417 | 0.219366634 | 1.71582802  | 0.086193524 | 0.135957365 |
| Cops2         | 950.8930539 | 0.376375171 | 0.189532181 | 1.985811429 | 0.047054266 | 0.080121967 |
| Dennd4a       | 641.7355528 | 0.376338474 | 0.174680493 | 2.154439041 | 0.031205758 | 0.055764754 |
| Defb47        | 0.884910883 | 0.376318605 | 2.389989773 | 0.157456157 | 0.874885358 | NA          |
| Mfsd9         | 33.36019292 | 0.376238751 | 0.344264138 | 1.092878142 | 0.274447306 | 0.361267677 |
| Nfic          | 1551.684492 | 0.376200477 | 0.16832702  | 2.234938139 | 0.02542141  | 0.046480502 |
| Gm49252       | 0.372318816 | 0.37620442  | 3.244869869 | 0.115881517 | 0.907746445 | NA          |
| Trf           | 250471.7409 | 0.37536022  | 0.209814254 | 1.789012012 | 0.073612881 | 0.118259777 |
| Rpusd2        | 44.37182731 | 0.374906235 | 0.317978218 | 1.179031184 | 0.238385759 | 0.321748113 |
| Megf9         | 508.3000099 | 0.374877175 | 0.251867593 | 1.488389873 | 0.136648106 | 0.201155074 |
| 2610301B20Rik | 104.3053269 | 0.374819208 | 0.283406169 | 1.322551339 | 0.185984626 | 0.261017143 |

|               |             |             |             |             |                |             |
|---------------|-------------|-------------|-------------|-------------|----------------|-------------|
| Pxk           | 548.8448169 | 0.374776251 | 0.162860124 | 2.301215561 | 0.02137945     | 0.039885846 |
| Gm19353       | 0.379383381 | 0.374644254 | 3.225017983 | 0.116168113 | 0.907519308 NA |             |
| Dxo           | 420.6343131 | 0.374614792 | 0.219704524 | 1.705084564 | 0.088178654    | 0.138742012 |
| Zkscan1       | 756.1661234 | 0.374588388 | 0.131910857 | 2.839708551 | 0.004515477    | 0.00991991  |
| Pold2         | 258.2040357 | 0.374586393 | 0.240942244 | 1.554672966 | 0.120023976    | 0.180422251 |
| Gm48333       | 0.354872757 | 0.374507463 | 3.297479914 | 0.113573842 | 0.909575624 NA |             |
| Gm49530       | 0.710812185 | 0.37444756  | 2.742774138 | 0.136521471 | 0.891409052 NA |             |
| Cox15         | 473.3294993 | 0.374002206 | 0.190514327 | 1.963118527 | 0.049632403    | 0.083833668 |
| Traf3ip2      | 60.52952905 | 0.373948054 | 0.411813814 | 0.908051262 | 0.363851139    | 0.456165187 |
| Thoc3         | 342.4873474 | 0.373944781 | 0.221200038 | 1.690527651 | 0.090927053    | 0.142474669 |
| Jmy           | 403.5381506 | 0.373903116 | 0.205660105 | 1.818063437 | 0.069054438    | 0.111862415 |
| Usp24         | 1369.007437 | 0.37378267  | 0.211818567 | 1.764636009 | 0.07762496     | 0.123932413 |
| Cdk5rap3      | 1139.501673 | 0.37361399  | 0.131569369 | 2.839673033 | 0.00451598     | 0.00991991  |
| Mpv17l2       | 244.4709508 | 0.37359016  | 0.248758234 | 1.501820279 | 0.13314353     | 0.196965541 |
| Trdn          | 0.90639983  | 0.373436528 | 2.106623097 | 0.177267841 | 0.85929801 NA  |             |
| Tmem222       | 345.6296332 | 0.373328989 | 0.160139965 | 2.331266828 | 0.019739294    | 0.037155293 |
| Gpatch1       | 207.4966052 | 0.373199113 | 0.178469818 | 2.091104917 | 0.03651866     | 0.063987355 |
| Gm13611       | 0.458534213 | 0.373027242 | 3.06098655  | 0.121865038 | 0.903005905 NA |             |
| Prkra         | 297.6736038 | 0.372314768 | 0.193719505 | 1.92192711  | 0.05461493     | 0.090969744 |
| Ankrd26       | 130.0513013 | 0.372208299 | 0.288911482 | 1.28831259  | 0.197637172    | 0.274419165 |
| Tmem161b      | 201.4189491 | 0.372070218 | 0.168236686 | 2.211587896 | 0.026995153    | 0.049037119 |
| Abca3         | 990.7305548 | 0.372012758 | 0.204751577 | 1.816898135 | 0.069232712    | 0.112087066 |
| Osgep         | 394.5089798 | 0.371251199 | 0.205103192 | 1.810070317 | 0.070284883    | 0.113564277 |
| Rps2-ps4      | 0.37090778  | 0.371075481 | 3.248999429 | 0.114212233 | 0.909069555 NA |             |
| Rnpc3         | 330.7116442 | 0.371058366 | 0.24021943  | 1.544664253 | 0.122427496    | 0.183436803 |
| Arid4b        | 557.1607642 | 0.371031233 | 0.185065554 | 2.00486381  | 0.044977609    | 0.076962589 |
| 1700016D06Rik | 1.396892939 | 0.370919682 | 1.99259764  | 0.186148811 | 0.852328065 NA |             |
| Ubac2         | 486.4082109 | 0.370797636 | 0.141364498 | 2.622989808 | 0.008716188    | 0.01795042  |
| Sf3b5         | 448.7626849 | 0.370739748 | 0.20826631  | 1.780123482 | 0.075055754    | 0.120235905 |
| Hras          | 634.1634637 | 0.370558542 | 0.163248031 | 2.269911245 | 0.023212969    | 0.042953944 |
| Btg1          | 1511.506389 | 0.370365058 | 0.15463651  | 2.395068658 | 0.016617253    | 0.0318801   |
| Vamp1         | 189.4775212 | 0.370350173 | 0.279786442 | 1.323688778 | 0.185606427    | 0.260622549 |
| Slc12a8       | 36.90774357 | 0.370190042 | 0.388534744 | 0.952784911 | 0.340699061    | 0.433033847 |
| Cdc14b        | 631.4709846 | 0.369971932 | 0.242914769 | 1.523052442 | 0.127745586    | 0.190068664 |
| Nat10         | 506.080994  | 0.369627764 | 0.183010826 | 2.019704367 | 0.043414062    | 0.074609166 |
| Kif13a        | 252.1339952 | 0.369507592 | 0.191318081 | 1.93137831  | 0.053436285    | 0.089364508 |
| Prkg2         | 10.54924926 | 0.369366522 | 0.631916811 | 0.584517638 | 0.558872102    | 0.643934279 |
| Dynll2        | 2377.525349 | 0.369335986 | 0.12622773  | 2.92594969  | 0.003434065    | 0.007733677 |
| Pex26         | 479.479156  | 0.369002462 | 0.20014507  | 1.843675    | 0.065230518    | 0.106324685 |
| Gm7831        | 0.332031403 | 0.36897705  | 3.636537046 | 0.10146385  | 0.919182253 NA |             |
| Fut8          | 83.48323627 | 0.36889061  | 0.268322169 | 1.374804819 | 0.169191964    | 0.240907425 |
| Setdb1        | 640.9301662 | 0.368422873 | 0.14006969  | 2.630282632 | 0.008531391    | 0.017633748 |
| Prep          | 725.5186749 | 0.368169801 | 0.228488038 | 1.611330743 | 0.107107653    | 0.163573526 |
| Cdc42ep4      | 917.7213562 | 0.368033283 | 0.246374268 | 1.493797568 | 0.135228537    | 0.199306312 |
| E130308A19Rik | 89.24035086 | 0.368009357 | 0.333259634 | 1.104272224 | 0.269475068    | 0.355838612 |
| Rhbdd2        | 311.4591713 | 0.367879558 | 0.264219707 | 1.392324447 | 0.163824172    | 0.234360534 |
| Tmem91        | 1.460148522 | 0.367835695 | 1.511285281 | 0.243392627 | 0.807701255 NA |             |
| Gm6089        | 0.370670012 | 0.367416575 | 3.249830241 | 0.113057159 | 0.909985239 NA |             |
| Phf20l1       | 806.7046239 | 0.367260598 | 0.179152754 | 2.049985781 | 0.040365818    | 0.06997727  |
| Txndc9        | 811.983308  | 0.367224108 | 0.154361948 | 2.378980788 | 0.017360581    | 0.033142573 |
| Rnf19b        | 440.2924361 | 0.367107121 | 0.1625945   | 2.257807747 | 0.023957648    | 0.044146778 |
| Gid4          | 494.5872229 | 0.366864582 | 0.203388682 | 1.803761048 | 0.071268775    | 0.114914411 |
| Gm9085        | 0.377816593 | 0.366337345 | 3.22943161  | 0.113437096 | 0.909684031 NA |             |
| Camkv         | 1.307516468 | 0.366239599 | 1.719259722 | 0.213021682 | 0.831310051 NA |             |
| Kmt2c         | 644.8862639 | 0.366125699 | 0.221370326 | 1.653905948 | 0.098146624    | 0.151929869 |
| Gm49373       | 4.214138308 | 0.366012675 | 1.508803962 | 0.242584646 | 0.808327176    | 0.85677454  |
| Top1mt        | 420.8505666 | 0.365907016 | 0.152651464 | 2.397009544 | 0.016529493    | 0.031740797 |
| Wdr25         | 63.96873111 | 0.365814991 | 0.414810113 | 0.881885422 | 0.377838771    | 0.469934732 |
| Rfxap         | 162.0851332 | 0.365414993 | 0.196688019 | 1.857840624 | 0.06319165     | 0.103401377 |
| Abhd13        | 363.8080296 | 0.365314344 | 0.149996221 | 2.435490313 | 0.014871623    | 0.02886944  |
| Gm43110       | 20.9059884  | 0.365298075 | 0.707787136 | 0.516112905 | 0.605775555    | 0.687338547 |
| Taf5          | 79.23928902 | 0.365285603 | 0.246754969 | 1.480357637 | 0.138777829    | 0.203744784 |
| Smg5          | 779.2593057 | 0.364781271 | 0.155390929 | 2.347506858 | 0.018899525    | 0.035736369 |
| Folr2         | 62.45389511 | 0.364662408 | 0.719398407 | 0.506899105 | 0.612225614    | 0.692904618 |
| Gm49309       | 0.355272229 | 0.36449349  | 3.296792385 | 0.110560038 | 0.911965239 NA |             |
| Gbp7          | 210.1251454 | 0.364437446 | 0.277470325 | 1.313428548 | 0.189038583    | 0.264591935 |

|               |             |             |             |             |                |             |
|---------------|-------------|-------------|-------------|-------------|----------------|-------------|
| Slc25a26      | 143.23728   | 0.364405661 | 0.21039988  | 1.731967055 | 0.083279428    | 0.131873277 |
| Gm7232        | 0.355265292 | 0.364388831 | 3.29682179  | 0.110527306 | 0.911991195 NA |             |
| Actbl2        | 0.354224352 | 0.364057037 | 3.299779669 | 0.110327681 | 0.912149505 NA |             |
| Ano4          | 8.258997411 | 0.363936554 | 0.682002438 | 0.533629404 | 0.593597961    | 0.67622172  |
| Med4          | 260.7864763 | 0.363831776 | 0.20264105  | 1.795449518 | 0.072582109    | 0.116811082 |
| Gm14730       | 1.725536909 | 0.363825429 | 1.656730174 | 0.219604516 | 0.826179174    | 0.870701941 |
| Tpst1         | 372.6598775 | 0.36378587  | 0.171850247 | 2.116877203 | 0.034270271    | 0.060524146 |
| Cpsf3         | 739.3453293 | 0.363690638 | 0.202673853 | 1.794462543 | 0.072739372    | 0.117042078 |
| Skor1         | 0.355200481 | 0.363407554 | 3.297096612 | 0.110220475 | 0.912234525 NA |             |
| Neurl4        | 521.924832  | 0.363303462 | 0.197452475 | 1.839953953 | 0.065774998    | 0.107058637 |
| Lgi3          | 4.452461835 | 0.36326251  | 0.971301785 | 0.373995514 | 0.708407654    | 0.774472007 |
| Thap6         | 196.539364  | 0.36322644  | 0.251315519 | 1.445300477 | 0.148373504    | 0.215788389 |
| Letmd1        | 618.9826677 | 0.363038211 | 0.132836234 | 2.732975789 | 0.006276495    | 0.013345183 |
| Ankrd40       | 1096.789787 | 0.363008397 | 0.129622299 | 2.800508873 | 0.00510221     | 0.011072108 |
| Scn1a         | 0.371403245 | 0.362886745 | 3.248153202 | 0.111720945 | 0.911044672 NA |             |
| Dhx30         | 524.9623781 | 0.362884913 | 0.280065577 | 1.295714086 | 0.195074007    | 0.271634539 |
| Slc13a5       | 15.76842231 | 0.362513805 | 0.827572016 | 0.438045025 | 0.661353645    | 0.73547012  |
| Rpsa-ps1      | 0.332197188 | 0.362447492 | 3.636571751 | 0.099667356 | 0.920608417 NA |             |
| Zfp626        | 132.8229985 | 0.362296907 | 0.215342899 | 1.682418638 | 0.09248769     | 0.144442116 |
| Tdrd1         | 0.37756728  | 0.362163853 | 3.230253106 | 0.112216246 | 0.910731236 NA |             |
| Pitrm1        | 552.2323732 | 0.362098777 | 0.172762063 | 2.09593918  | 0.036087587    | 0.063313901 |
| Bclaf1        | 1368.027899 | 0.361981146 | 0.171200504 | 2.114369625 | 0.03448371     | 0.060850666 |
| Hnrnpu        | 6204.319075 | 0.361962546 | 0.108925141 | 3.323039484 | 0.000890423    | 0.002270406 |
| Ewsr1         | 3012.862006 | 0.361933628 | 0.14552594  | 2.487072941 | 0.012879899    | 0.025393375 |
| Riok3         | 1146.988052 | 0.361914216 | 0.14439907  | 2.506347272 | 0.012198574    | 0.024229442 |
| 1810037117Rik | 397.8277007 | 0.361641137 | 0.165397004 | 2.18650356  | 0.028778784    | 0.051873622 |
| Xylt2         | 317.3990018 | 0.36154601  | 0.165055052 | 2.190457096 | 0.028491103    | 0.051442102 |
| Pip4p1        | 468.185335  | 0.361492422 | 0.169094835 | 2.137808771 | 0.032532267    | 0.057826096 |
| Gm11343       | 1.713724714 | 0.361402562 | 2.004651193 | 0.180282018 | 0.856931172    | 0.894011619 |
| Spock2        | 11.35241972 | 0.361361369 | 0.652565678 | 0.553754789 | 0.579746674    | 0.663279061 |
| Ergic3        | 1463.286615 | 0.361342245 | 0.133561162 | 2.705444001 | 0.006821315    | 0.014378063 |
| Rab23         | 173.5839745 | 0.361213859 | 0.185114338 | 1.951301356 | 0.051021208    | 0.08588167  |
| Tmem150a      | 3084.685165 | 0.361185964 | 0.256725132 | 1.406897567 | 0.159457765    | 0.229133174 |
| Pik3r2        | 551.2074221 | 0.361142963 | 0.183265669 | 1.970598015 | 0.048769874    | 0.082663433 |
| Mgam          | 2075.508972 | 0.361121621 | 0.260801453 | 1.384661076 | 0.166156127    | 0.237198932 |
| Smim6         | 15.9645018  | 0.360977414 | 0.498483005 | 0.724151898 | 0.468972486    | 0.559481934 |
| Sftpb         | 0.770266014 | 0.360946369 | 2.143043397 | 0.168426999 | 0.866247369 NA |             |
| Prkcsh        | 2009.985279 | 0.360850115 | 0.109226708 | 3.303680223 | 0.000954246    | 0.002417641 |
| 1700020N01Rik | 0.418590394 | 0.360675785 | 3.636581171 | 0.099179908 | 0.920995428 NA |             |
| D430019H16Rik | 16.07215713 | 0.360642298 | 0.478618756 | 0.753506404 | 0.451145664    | 0.542201712 |
| Allyref2      | 55.27608521 | 0.36059542  | 0.269248332 | 1.339267053 | 0.18048375     | 0.254498509 |
| Ttc14         | 662.1909253 | 0.360569679 | 0.186248141 | 1.935963909 | 0.052872121    | 0.088533928 |
| Pramef12      | 0.440275236 | 0.360424299 | 3.101702562 | 0.116202083 | 0.907492386 NA |             |
| Sifn14        | 0.86565895  | 0.36024928  | 1.863722719 | 0.193295535 | 0.846727523 NA |             |
| Cr1l          | 896.6860825 | 0.360245933 | 0.139783736 | 2.577166298 | 0.009961401    | 0.020226533 |
| Samd8         | 558.52626   | 0.360214616 | 0.166948499 | 2.157639143 | 0.030955899    | 0.055353069 |
| Chmp1a        | 1037.36113  | 0.359935968 | 0.116399252 | 3.092253276 | 0.001986433    | 0.004698211 |
| Sfxn1         | 1789.051142 | 0.359722231 | 0.207391452 | 1.734508472 | 0.082827904    | 0.131207034 |
| Catsperg2     | 3.879780649 | 0.359627517 | 0.976896971 | 0.368132493 | 0.712774444    | 0.778001899 |
| Fit3l         | 176.1515731 | 0.359270102 | 0.228704662 | 1.570891034 | 0.116207962    | 0.175659366 |
| Nabp1         | 569.8336447 | 0.359245637 | 0.196214612 | 1.830881167 | 0.067118282    | 0.109047219 |
| Actr10        | 696.8603399 | 0.359114585 | 0.141247728 | 2.54244503  | 0.011007991    | 0.022127607 |
| Rnf10         | 2501.420762 | 0.358970612 | 0.12248883  | 2.930639568 | 0.00338265     | 0.007638069 |
| Pa2g4         | 1749.968284 | 0.358935802 | 0.142869927 | 2.51232579  | 0.011993831    | 0.023875622 |
| Medag         | 30.87256473 | 0.358672806 | 0.38782418  | 0.92483353  | 0.355052506    | 0.44754511  |
| Trp63         | 0.463559622 | 0.358498991 | 3.048344423 | 0.11760449  | 0.906381047 NA |             |
| Irak2         | 656.0720778 | 0.358311273 | 0.142241535 | 2.519034065 | 0.011767727    | 0.02348586  |
| Pgam5         | 357.559064  | 0.358302163 | 0.181377747 | 1.975447198 | 0.048217421    | 0.081849108 |
| Terf1         | 235.6410442 | 0.358135539 | 0.225576825 | 1.58764332  | 0.112367017    | 0.170688131 |
| Rwdd1         | 466.8709495 | 0.358097936 | 0.130765264 | 2.738479047 | 0.006172409    | 0.013140264 |
| Rabl3         | 241.8510314 | 0.357767834 | 0.204143367 | 1.752532244 | 0.07968233     | 0.126789655 |
| Paip1         | 771.2536462 | 0.357484111 | 0.18222182  | 1.961807378 | 0.049784914    | 0.084049636 |
| Cwf19l2       | 203.4702503 | 0.357478778 | 0.187766882 | 1.903843613 | 0.056930555    | 0.09437496  |
| 5730455P16Rik | 300.917553  | 0.357355231 | 0.212916133 | 1.678384936 | 0.093271977    | 0.145482291 |
| Olf104-ps     | 0.333349086 | 0.357312186 | 3.63659906  | 0.09825449  | 0.921730215 NA |             |
| Shoc2         | 539.328916  | 0.357288521 | 0.167576999 | 2.13208569  | 0.032999803    | 0.058577742 |

|               |             |             |             |             |             |             |
|---------------|-------------|-------------|-------------|-------------|-------------|-------------|
| Aco2          | 3602.000217 | 0.357287682 | 0.165527919 | 2.158473838 | 0.03089101  | 0.05524863  |
| Selenof       | 3256.203808 | 0.357223574 | 0.204388113 | 1.747770797 | 0.080503724 | 0.127905637 |
| Guf1          | 322.4182932 | 0.357169638 | 0.196238227 | 1.820081866 | 0.068746539 | 0.111416579 |
| Gm1980        | 2.145992337 | 0.357117561 | 1.686501545 | 0.211750509 | 0.832301681 | 0.875084724 |
| Lbhd1         | 117.184212  | 0.356906317 | 0.47515284  | 0.751140027 | 0.452568389 | 0.543413572 |
| Gm13301       | 39.59423113 | 0.356862559 | 0.473148776 | 0.754229065 | 0.450711688 | 0.541743943 |
| Oscar         | 2.273835861 | 0.356732387 | 1.380172578 | 0.258469406 | 0.796044657 | 0.846334226 |
| Ppt2          | 570.8991008 | 0.35672913  | 0.125988876 | 2.831433547 | 0.004633986 | 0.010149049 |
| Gm19040       | 3.426450522 | 0.35661695  | 0.948557646 | 0.375957067 | 0.706948814 | 0.773262119 |
| Espnl         | 4.189819015 | 0.356550352 | 0.934649325 | 0.381480351 | 0.702846849 | 0.769961    |
| Cript         | 495.5378619 | 0.356375396 | 0.15561895  | 2.29005141  | 0.022018337 | 0.040965688 |
| Prrxl1        | 0.333375844 | 0.356306556 | 3.636604409 | 0.097977815 | 0.921949909 | NA          |
| Sumf1         | 479.0386098 | 0.356192796 | 0.172211446 | 2.068345661 | 0.038607531 | 0.067271176 |
| Mpv17         | 534.4499161 | 0.35618011  | 0.138121922 | 2.578736992 | 0.009916225 | 0.020144401 |
| Gpr45         | 1.749261602 | 0.356127582 | 1.656003573 | 0.215052423 | 0.829726447 | 0.873446781 |
| Ppil4         | 311.7106645 | 0.356047082 | 0.160412892 | 2.219566508 | 0.026448208 | 0.048146188 |
| Olfr1378      | 4.316082298 | 0.355905907 | 1.027066802 | 0.346526542 | 0.728947041 | 0.792089308 |
| Cpeb4         | 902.3250032 | 0.355627252 | 0.176960705 | 2.009639662 | 0.04446934  | 0.076184636 |
| Myo19         | 193.5678857 | 0.355332454 | 0.25112241  | 1.414977079 | 0.157075217 | 0.226396541 |
| Tenm2         | 0.418341809 | 0.355190865 | 3.636610344 | 0.097670861 | 0.922193654 | NA          |
| Stxbp5l       | 1.747361602 | 0.354945609 | 2.161442959 | 0.164216968 | 0.869560344 | 0.903532928 |
| D10Wsu102e    | 1400.880215 | 0.354227293 | 0.11083557  | 3.195971231 | 0.00139361  | 0.003415507 |
| Adgrg3        | 80.82267553 | 0.354218822 | 0.294079459 | 1.20450039  | 0.228396232 | 0.310428044 |
| Nppla2        | 1380.498334 | 0.354186801 | 0.239931324 | 1.47620075  | 0.139890008 | 0.205054521 |
| Gm16072       | 1.727939214 | 0.354075007 | 1.980130581 | 0.178813969 | 0.858083777 | 0.894825803 |
| Slc5a6        | 118.4254173 | 0.354047875 | 0.249534392 | 1.418833981 | 0.155947423 | 0.225170803 |
| Arhgap5       | 1203.089672 | 0.353927628 | 0.234525621 | 1.509121378 | 0.131267767 | 0.194530718 |
| Arsb          | 547.2028953 | 0.353780274 | 0.168091998 | 2.104682428 | 0.035318961 | 0.062112404 |
| Gm11478       | 1.37754555  | 0.353191057 | 1.493222154 | 0.236529478 | 0.813021836 | NA          |
| Nnt           | 731.1995279 | 0.353183281 | 0.195247022 | 1.808904833 | 0.07046579  | 0.113781093 |
| Rab11a        | 1059.373279 | 0.352837137 | 0.167842542 | 2.102191336 | 0.035536518 | 0.06242417  |
| Txndc5        | 3218.835469 | 0.352605387 | 0.19481473  | 1.809952388 | 0.070303171 | 0.113583061 |
| Nlrp5         | 4.692731729 | 0.352308364 | 0.899598245 | 0.391628558 | 0.695332684 | 0.764233872 |
| Arv1          | 47.93187851 | 0.352150172 | 0.319186818 | 1.103272919 | 0.269908663 | 0.356311204 |
| Fbxo46        | 105.0046867 | 0.35205234  | 0.237866485 | 1.480041795 | 0.138862093 | 0.203773479 |
| Vamp8         | 2125.629619 | 0.352012719 | 0.144673247 | 2.433156972 | 0.01496781  | 0.029036326 |
| Creb3l4       | 5.531976156 | 0.351929592 | 0.877287876 | 0.401156338 | 0.688305024 | 0.758514806 |
| Rfk           | 737.7796771 | 0.351359831 | 0.172407836 | 2.037957432 | 0.04155419  | 0.071782933 |
| Rnf135        | 266.8594444 | 0.351209949 | 0.216827143 | 1.619769295 | 0.105281844 | 0.161247407 |
| Setd3         | 1660.622943 | 0.351109985 | 0.168414343 | 2.084798593 | 0.037087586 | 0.064908036 |
| Tmem177       | 159.3213886 | 0.350392493 | 0.194140958 | 1.804835496 | 0.071100428 | 0.114686356 |
| Tstd2         | 357.020344  | 0.35021302  | 0.156934569 | 2.231586201 | 0.025642324 | 0.046829175 |
| Fam126a       | 135.3030825 | 0.350193117 | 0.310056993 | 1.129447572 | 0.258709074 | 0.343682093 |
| Pcx           | 6737.754904 | 0.350075886 | 0.248820562 | 1.406941141 | 0.159444843 | 0.229133174 |
| Trpc3         | 10.79751078 | 0.349956792 | 0.892771902 | 0.39198903  | 0.695066319 | 0.76413817  |
| Thrap3        | 1854.751348 | 0.349636853 | 0.119448712 | 2.927087684 | 0.003421524 | 0.007712567 |
| Aatf          | 274.9576352 | 0.349438596 | 0.18554871  | 1.883271489 | 0.059663585 | 0.098341371 |
| Zfp513        | 327.6815686 | 0.349172536 | 0.190315791 | 1.834700811 | 0.066550032 | 0.10823745  |
| Bahcc1        | 208.6439148 | 0.349140705 | 0.234407999 | 1.489457297 | 0.13636699  | 0.200775926 |
| 2310033P09Rik | 153.1630854 | 0.348974951 | 0.223205344 | 1.563470409 | 0.11794199  | 0.177794239 |
| Actl6a        | 384.8737121 | 0.348784705 | 0.214828577 | 1.623548928 | 0.104472113 | 0.160223154 |
| Timm22        | 204.1587824 | 0.348654857 | 0.233351911 | 1.494116146 | 0.135145265 | 0.199218026 |
| Rbbp5         | 429.6747235 | 0.348643919 | 0.192090433 | 1.814998868 | 0.069524083 | 0.112494929 |
| Mkln1         | 1278.380895 | 0.348553302 | 0.142818185 | 2.440538671 | 0.014665376 | 0.028517774 |
| Wdr74         | 399.2395731 | 0.348541764 | 0.199730653 | 1.74505895  | 0.080974608 | 0.128581885 |
| Eloa          | 612.3930797 | 0.348276997 | 0.207273042 | 1.680281205 | 0.092902616 | 0.145010419 |
| Aimp1         | 507.1238899 | 0.348244312 | 0.165525498 | 2.103871099 | 0.035389693 | 0.062191885 |
| Akap11        | 561.6189625 | 0.34823423  | 0.158167518 | 2.201679805 | 0.027687934 | 0.050135306 |
| C9orf72       | 193.5727463 | 0.347922577 | 0.177301569 | 1.962320909 | 0.049725134 | 0.083973659 |
| Fam50a        | 403.5558976 | 0.34780277  | 0.176085512 | 1.975192426 | 0.048246315 | 0.08188185  |
| Wapl          | 1033.229804 | 0.347330133 | 0.147084656 | 2.361430099 | 0.018204604 | 0.034579619 |
| Gm32687       | 99.45639633 | 0.346944982 | 0.307557826 | 1.128064229 | 0.259292795 | 0.344296563 |
| Dnajb4        | 546.5507789 | 0.346891309 | 0.226161956 | 1.533818131 | 0.125074401 | 0.186811669 |
| Ube2l3        | 1779.229804 | 0.346854035 | 0.153924119 | 2.253409256 | 0.024233356 | 0.044566371 |
| Eprs          | 2227.988831 | 0.346830591 | 0.211555279 | 1.639432455 | 0.101123227 | 0.155830134 |
| Man2c1        | 843.2881874 | 0.346647795 | 0.215957817 | 1.605164379 | 0.108457634 | 0.165442533 |



|               |             |             |             |             |                |             |
|---------------|-------------|-------------|-------------|-------------|----------------|-------------|
| D430042009Rik | 343.8460222 | 0.346629816 | 0.210842804 | 1.644020139 | 0.100172042    | 0.154629933 |
| Rdm1          | 122.1871096 | 0.346615463 | 0.298504157 | 1.161174662 | 0.245570877    | 0.329385705 |
| Haus2         | 220.923177  | 0.346392321 | 0.167369503 | 2.069626267 | 0.038487356    | 0.067082349 |
| Pixnb2        | 4657.660039 | 0.346346897 | 0.153530975 | 2.255876355 | 0.024078376    | 0.044314817 |
| Plekhn1       | 278.8281573 | 0.346044894 | 0.190312667 | 1.818296694 | 0.069018798    | 0.111825933 |
| Rab9b         | 2.1315978   | 0.345862666 | 1.29336953  | 0.267412103 | 0.789151882    | 0.840893886 |
| Slc25a30      | 1014.022458 | 0.34554698  | 0.346233976 | 0.998015803 | 0.318271696    | 0.409656162 |
| Surf2         | 352.4388027 | 0.345454214 | 0.235296411 | 1.468166099 | 0.14205911     | 0.207828346 |
| Nme1          | 1028.28704  | 0.34537504  | 0.235689505 | 1.465381497 | 0.142816863    | 0.208793575 |
| Erc2          | 193.8295193 | 0.345341528 | 0.24499955  | 1.409559848 | 0.15866969     | 0.228212341 |
| Tmub1         | 119.9430703 | 0.345273333 | 0.232118867 | 1.487485005 | 0.136886761    | 0.201436814 |
| Cep41         | 63.94452761 | 0.345224428 | 0.337332661 | 1.023394613 | 0.306121306    | 0.396438137 |
| Bud13         | 144.8217713 | 0.345155629 | 0.207332534 | 1.664744174 | 0.095963806    | 0.149038076 |
| Gsta4         | 1591.04771  | 0.344562188 | 0.330282026 | 1.04323627  | 0.296838879    | 0.386298413 |
| Tomm5         | 344.7189457 | 0.344434756 | 0.177300833 | 1.942657293 | 0.052057579    | 0.087401774 |
| Olfr1419      | 3.063834601 | 0.344018332 | 1.186128087 | 0.290034723 | 0.771789673    | 0.827305731 |
| Men1          | 436.434476  | 0.34377785  | 0.159045848 | 2.161501566 | 0.030656616    | 0.054854294 |
| Lsamp         | 2.6280463   | 0.343443384 | 1.213548648 | 0.283007513 | 0.777171078    | 0.831610127 |
| Trmt11        | 125.3930952 | 0.343226072 | 0.239898411 | 1.430714241 | 0.15251213     | 0.220902871 |
| Thg1l         | 71.27001584 | 0.342904458 | 0.266778298 | 1.285353645 | 0.198668732    | 0.275671866 |
| Plrg1         | 444.6336401 | 0.34271473  | 0.205675696 | 1.666286964 | 0.095656272    | 0.148695917 |
| Pfkm          | 322.2217218 | 0.342390454 | 0.249008966 | 1.375012552 | 0.169127553    | 0.240855946 |
| Nufip2        | 561.5761638 | 0.342144438 | 0.191663958 | 1.785126647 | 0.074240777    | 0.119131849 |
| Mrps9         | 470.2897555 | 0.341758127 | 0.166600791 | 2.05135957  | 0.040231943    | 0.06976647  |
| Exoc3l2       | 84.49966082 | 0.341454765 | 0.331583706 | 1.029769434 | 0.303118252    | 0.393179637 |
| Mri1          | 471.5468722 | 0.341337187 | 0.16373366  | 2.084709929 | 0.037095639    | 0.064915464 |
| Tnfaip8l3     | 13.64938015 | 0.340800667 | 0.803422149 | 0.424186298 | 0.671429953    | 0.743692291 |
| Rab10         | 1529.574885 | 0.340784027 | 0.136923168 | 2.488870451 | 0.012814965    | 0.025297537 |
| Ripply3       | 17.59226304 | 0.340738286 | 0.434313381 | 0.784544758 | 0.43272053     | 0.524167934 |
| Zfp846        | 103.2776334 | 0.3407178   | 0.267759725 | 1.272475911 | 0.203204078    | 0.281072869 |
| Por           | 4476.002125 | 0.340685591 | 0.379492468 | 0.897740059 | 0.369324148    | 0.461567192 |
| Alkbh4        | 80.97965611 | 0.34048689  | 0.240049255 | 1.41840428  | 0.156072767    | 0.225276474 |
| Gm48269       | 19.10992094 | 0.340482235 | 0.502605656 | 0.677434148 | 0.498130538    | 0.58773129  |
| Efna5         | 63.47569429 | 0.340426486 | 0.289918111 | 1.174216003 | 0.240308518    | 0.32372814  |
| Gpatch4       | 213.2496743 | 0.340413654 | 0.19833565  | 1.716351313 | 0.086097762    | 0.135844021 |
| Sec22c        | 144.5830117 | 0.340360562 | 0.215518049 | 1.57926709  | 0.114274807    | 0.173169503 |
| Scnm1         | 250.6203962 | 0.340317447 | 0.191506085 | 1.777058139 | 0.075558675    | 0.120960483 |
| Cct8          | 2693.272545 | 0.340299505 | 0.104939825 | 3.242806113 | 0.001183587    | 0.002943945 |
| Nfkb1a        | 914.4558779 | 0.340176976 | 0.183773105 | 1.851070516 | 0.064159409    | 0.104769119 |
| Myo15         | 5.845200157 | 0.340130784 | 0.915911596 | 0.371357657 | 0.710371159    | 0.776158913 |
| Xdht          | 2114.948561 | 0.34001994  | 0.152095039 | 2.235575481 | 0.025379592    | 0.046423522 |
| Supt7l        | 199.416665  | 0.339962675 | 0.205250596 | 1.656329786 | 0.097655052    | 0.151320062 |
| Pias4         | 284.0901886 | 0.339901977 | 0.212118691 | 1.602414083 | 0.109064073    | 0.166263463 |
| Cntrl         | 838.7529871 | 0.339874297 | 0.176570059 | 1.924869365 | 0.054245703    | 0.090513923 |
| Ift46         | 517.4092035 | 0.339855745 | 0.233734755 | 1.454023154 | 0.145939887    | 0.21284825  |
| Rpl35a        | 4370.052268 | 0.339840414 | 0.144014344 | 2.35976781  | 0.018286376    | 0.034719473 |
| Pole3         | 320.5031346 | 0.339556511 | 0.182088802 | 1.864785242 | 0.062211513    | 0.101969221 |
| Selenbp1      | 7156.806325 | 0.339328303 | 0.275483507 | 1.231755424 | 0.218040459    | 0.298470672 |
| Rbm5          | 1385.71046  | 0.339163663 | 0.151498801 | 2.238721761 | 0.025174026    | 0.046092449 |
| Hp1bp3        | 1863.089804 | 0.339107563 | 0.138831632 | 2.442581416 | 0.01458264     | 0.028392513 |
| Babam2        | 489.7639817 | 0.338853015 | 0.197769308 | 1.713375139 | 0.086643547    | 0.136553498 |
| Lurap1l       | 1327.995281 | 0.338845317 | 0.259105535 | 1.307750206 | 0.190958048    | 0.266812835 |
| Tceanc2       | 271.4025559 | 0.338811684 | 0.275934865 | 1.227868337 | 0.219496397    | 0.30012629  |
| Manea         | 309.7741663 | 0.338610431 | 0.149581494 | 2.263718742 | 0.023591419    | 0.043536102 |
| Ttf1          | 243.3344826 | 0.338595143 | 0.16542996  | 2.046758297 | 0.040681822    | 0.070467761 |
| Nedd1         | 318.5136003 | 0.3382421   | 0.18084888  | 1.870302425 | 0.061441833    | 0.100901683 |
| Rasa12        | 207.6852726 | 0.338079378 | 0.239577346 | 1.41114919  | 0.158200628    | 0.227691373 |
| Impad1        | 709.2075839 | 0.338011314 | 0.164640234 | 2.053029843 | 0.040069683    | 0.069539155 |
| Dhdds         | 448.6605988 | 0.337942717 | 0.234693205 | 1.439933962 | 0.149886084    | 0.217765293 |
| Map2k4        | 715.8888663 | 0.337934804 | 0.119508292 | 2.827710086 | 0.004688224    | 0.010254663 |
| Dad1          | 1202.109043 | 0.337883608 | 0.140424198 | 2.406163708 | 0.016121039    | 0.031050895 |
| Snupn         | 114.4192551 | 0.337853888 | 0.266936086 | 1.265673339 | 0.205630057    | 0.284036721 |
| Uba3          | 705.6218222 | 0.337849977 | 0.149019147 | 2.267158172 | 0.023380565    | 0.043212475 |
| Pthr2         | 336.8975886 | 0.337650338 | 0.158956163 | 2.124172675 | 0.033655707    | 0.059543638 |
| Ick           | 451.8414511 | 0.337504185 | 0.173342308 | 1.947038712 | 0.051530094    | 0.086652697 |
| Trat1         | 1.060347206 | 0.337041671 | 1.899481763 | 0.177438751 | 0.859163772 NA |             |

|               |             |             |             |             |             |             |
|---------------|-------------|-------------|-------------|-------------|-------------|-------------|
| Gypc          | 116.5824837 | 0.337030326 | 0.340451107 | 0.989952209 | 0.322197479 | 0.413585018 |
| Trappc2       | 98.33171405 | 0.336745803 | 0.237412123 | 1.418401886 | 0.156073465 | 0.225276474 |
| Rps2          | 13939.50803 | 0.336315513 | 0.142246079 | 2.364321853 | 0.018063112 | 0.034337638 |
| Pnp2          | 6.851155511 | 0.336114388 | 0.701761339 | 0.478958257 | 0.631968325 | 0.710297733 |
| Zfp619        | 46.63767302 | 0.336095001 | 0.333128874 | 1.008903841 | 0.313020753 | 0.404127922 |
| Cul5          | 368.4800207 | 0.335913628 | 0.177713467 | 1.890197939 | 0.058731492 | 0.096983193 |
| Gm16223       | 5.661274211 | 0.335801762 | 0.753305789 | 0.44577085  | 0.65576278  | 0.730682606 |
| Rsrc1         | 288.0102775 | 0.335771543 | 0.167084788 | 2.009587752 | 0.044474839 | 0.0761864   |
| Mib1          | 1227.220731 | 0.335590563 | 0.147611606 | 2.273470038 | 0.02299787  | 0.042583652 |
| Ghdc          | 298.3986772 | 0.335574077 | 0.22404821  | 1.497776199 | 0.134191407 | 0.198154621 |
| Sertm1        | 2.170942336 | 0.335274975 | 1.400584199 | 0.239382235 | 0.810809204 | 0.858657927 |
| Plekham1      | 368.2358582 | 0.334973126 | 0.129540167 | 2.585862999 | 0.009713553 | 0.019770374 |
| Slc24a4       | 1.203952389 | 0.334773179 | 1.741693363 | 0.192211319 | 0.84757668  | NA          |
| Stk38         | 1273.25951  | 0.334668189 | 0.188905545 | 1.771616545 | 0.076458231 | 0.122275791 |
| Zfp959        | 105.1596818 | 0.334630931 | 0.219306369 | 1.525860527 | 0.127044603 | 0.189223868 |
| Antxr2        | 522.0418167 | 0.334378466 | 0.220778551 | 1.514542354 | 0.12988834  | 0.19285285  |
| Ide           | 2481.996847 | 0.334208435 | 0.200804275 | 1.664349198 | 0.096042666 | 0.149146964 |
| Cd59b         | 111.1466107 | 0.334138528 | 0.322206986 | 1.037030673 | 0.299721562 | 0.389366242 |
| Dhdhd2        | 290.614961  | 0.3341356   | 0.162350926 | 2.058107138 | 0.03957985  | 0.068771701 |
| Arhgef11      | 657.9940753 | 0.334089021 | 0.20292316  | 1.646381915 | 0.099685154 | 0.153961995 |
| Cpsf7         | 968.8087347 | 0.333381589 | 0.140632552 | 2.37058621  | 0.017759902 | 0.03383292  |
| Trappc1       | 206.7054415 | 0.333120426 | 0.188502961 | 1.767189355 | 0.077196522 | 0.123294576 |
| Kbtbd3        | 70.14295365 | 0.333025703 | 0.310692985 | 1.071880344 | 0.28377378  | 0.37185053  |
| Ssr2          | 1628.333449 | 0.333000477 | 0.232745596 | 1.430748775 | 0.152502229 | 0.220902871 |
| Ipo4          | 813.4673817 | 0.332942475 | 0.201861751 | 1.6493589   | 0.099074129 | 0.153184814 |
| Nmi           | 338.8915047 | 0.332700494 | 0.203923242 | 1.631498653 | 0.102785144 | 0.157977022 |
| Gtf2ird1      | 585.4848683 | 0.332617209 | 0.235726758 | 1.411028651 | 0.158236166 | 0.227723296 |
| Gm15066       | 1.418646075 | 0.332498645 | 1.681974605 | 0.197683511 | 0.843292692 | NA          |
| Chordc1       | 550.7722857 | 0.332396427 | 0.151475821 | 2.194386041 | 0.028207669 | 0.050973536 |
| Lig4          | 87.35133745 | 0.332308065 | 0.264986091 | 1.25405852  | 0.209820736 | 0.288655899 |
| Nmnat2        | 7.397935481 | 0.332259061 | 0.726633272 | 0.457258253 | 0.647485432 | 0.723398103 |
| Gm7609        | 12.81409866 | 0.332207883 | 0.663666875 | 0.500564207 | 0.616677858 | 0.696796626 |
| H2-Q7         | 1479.367627 | 0.332009868 | 0.279252425 | 1.188923851 | 0.234469633 | 0.317266316 |
| Srek1ip1      | 294.0279109 | 0.331979986 | 0.215446482 | 1.540893046 | 0.123342819 | 0.184629763 |
| Mad2l1bp      | 132.2791951 | 0.33163819  | 0.220180406 | 1.506211184 | 0.132012969 | 0.195462663 |
| Sdhaf4        | 261.0411834 | 0.331608536 | 0.172185111 | 1.925883919 | 0.05411887  | 0.090328813 |
| Dram2         | 955.1351758 | 0.331561326 | 0.200245985 | 1.655770155 | 0.097768374 | 0.151459314 |
| Srsf2         | 3357.311016 | 0.331540556 | 0.189602155 | 1.748611753 | 0.080358153 | 0.1277226   |
| Zfp523        | 537.8382407 | 0.331128648 | 0.248158618 | 1.334342728 | 0.18209156  | 0.256405131 |
| Mrps26        | 380.9809171 | 0.331124813 | 0.21824208  | 1.517236334 | 0.129207026 | 0.191979904 |
| Ppp6r2        | 543.7341652 | 0.331041976 | 0.154770808 | 2.138917416 | 0.032442357 | 0.057702379 |
| Gtpbp3        | 193.2546923 | 0.331016163 | 0.247972823 | 1.334888878 | 0.181912719 | 0.256195624 |
| Gpr19         | 78.07088592 | 0.331013154 | 0.34292675  | 0.965259064 | 0.33441507  | 0.42650618  |
| Gm47968       | 6.474833637 | 0.33093183  | 0.685426292 | 0.482811696 | 0.629229446 | 0.707966182 |
| Epg5          | 492.4291695 | 0.330881851 | 0.139616689 | 2.369930513 | 0.017791429 | 0.033885407 |
| Actr1b        | 1348.084856 | 0.330824095 | 0.147330842 | 2.245450383 | 0.024739234 | 0.045398758 |
| Iars2         | 1175.863401 | 0.33074889  | 0.136985282 | 2.414484867 | 0.015757478 | 0.030433157 |
| Btbd1         | 665.2585701 | 0.330488261 | 0.173711511 | 1.902512152 | 0.057104232 | 0.094626064 |
| Nxph4         | 1.64995907  | 0.330149251 | 1.498559367 | 0.220311092 | 0.825628882 | 0.870297482 |
| Vmp1          | 3015.25826  | 0.329875989 | 0.199171808 | 1.656238359 | 0.097673558 | 0.151334983 |
| Skiv2l        | 1442.328741 | 0.329814196 | 0.191875767 | 1.718894482 | 0.085633587 | 0.135174203 |
| Atp6v1g1      | 1255.256341 | 0.329501482 | 0.111926962 | 2.943897306 | 0.003241075 | 0.007342704 |
| Ly6g6e        | 1.987441088 | 0.329392599 | 1.54448417  | 0.213270298 | 0.831116139 | 0.874135847 |
| Gm19194       | 1.214132266 | 0.329205165 | 1.529451199 | 0.215243981 | 0.829577102 | NA          |
| Zkscan8       | 259.8603579 | 0.328929691 | 0.149960033 | 2.193449039 | 0.028275042 | 0.05108987  |
| Ptcd1         | 253.4361471 | 0.328600408 | 0.170993326 | 1.92171482  | 0.054641651 | 0.091005361 |
| Twistnb       | 273.9641157 | 0.328487104 | 0.210323116 | 1.56182121  | 0.118330114 | 0.178300493 |
| 5430403G16Rik | 62.90347744 | 0.328278263 | 0.39338449  | 0.83449722  | 0.404000853 | 0.496910849 |
| Mrpl18        | 1328.894069 | 0.328128972 | 0.299428255 | 1.095851733 | 0.273143665 | 0.359885091 |
| Eif4g3        | 1330.767821 | 0.328069622 | 0.176288675 | 1.860979568 | 0.062747062 | 0.102738371 |
| Crnk1         | 288.7170563 | 0.328025577 | 0.16454949  | 1.993476713 | 0.046209271 | 0.078856422 |
| Kantr         | 54.70383822 | 0.327665315 | 0.442996223 | 0.73965713  | 0.459508067 | 0.550003056 |
| Sbbp9         | 379.6434158 | 0.327656282 | 0.166594086 | 1.966794202 | 0.049206941 | 0.08321754  |
| Olfr1410      | 1.557206294 | 0.327484102 | 1.532475759 | 0.213696106 | 0.830784048 | NA          |
| Necap1        | 625.6728439 | 0.327388382 | 0.204227367 | 1.603058335 | 0.108921776 | 0.166076239 |
| Mterf1a       | 69.30582306 | 0.327307771 | 0.264521788 | 1.237356338 | 0.215954821 | 0.295900802 |

|               |             |             |             |             |             |             |
|---------------|-------------|-------------|-------------|-------------|-------------|-------------|
| Mob2          | 325.2700469 | 0.326628441 | 0.144619686 | 2.258533742 | 0.023912403 | 0.044071206 |
| Cxxc1         | 818.2686555 | 0.32656394  | 0.160304976 | 2.037141633 | 0.041635851 | 0.07187929  |
| Prl8a1        | 168.5987156 | 0.326457275 | 0.394221691 | 0.828105817 | 0.407610575 | 0.500104001 |
| Gm11549       | 3.752841055 | 0.326436693 | 1.08345232  | 0.301293086 | 0.763191013 | 0.819841234 |
| Dolk          | 233.3362138 | 0.326377288 | 0.200792565 | 1.625445084 | 0.104067756 | 0.159674836 |
| Nt5c3         | 430.6237762 | 0.326310567 | 0.232844646 | 1.401408934 | 0.161091822 | 0.23115002  |
| Gm8809        | 1.23550033  | 0.325968164 | 1.64280529  | 0.198421667 | 0.842715167 | NA          |
| Jmjd6         | 416.8352839 | 0.325966712 | 0.23361374  | 1.395323376 | 0.162918346 | 0.233280024 |
| Ddx51         | 205.3833149 | 0.32570759  | 0.285110214 | 1.142391866 | 0.253291171 | 0.338118227 |
| Vps54         | 749.1394562 | 0.325346751 | 0.157306292 | 2.068237369 | 0.038617708 | 0.067282032 |
| Prkdc         | 185.9879532 | 0.32523786  | 0.172966303 | 1.880353884 | 0.060059864 | 0.098908478 |
| Myh7          | 2.246824284 | 0.324925582 | 1.547528569 | 0.20996419  | 0.833695622 | 0.876308217 |
| Gm15185       | 1.812713457 | 0.324841597 | 1.422572568 | 0.228347997 | 0.819375714 | 0.865096746 |
| Ipo11         | 282.2912939 | 0.324610238 | 0.22798638  | 1.423814169 | 0.154500273 | 0.223383992 |
| Zfp961        | 136.6990972 | 0.324600562 | 0.186356065 | 1.741829879 | 0.081538217 | 0.129380447 |
| Zfp143        | 164.2246442 | 0.324563687 | 0.246784468 | 1.315170645 | 0.188452558 | 0.264010125 |
| Prpf19        | 2141.670991 | 0.324563681 | 0.1674554   | 1.938209699 | 0.052597644 | 0.088134916 |
| Fnta          | 531.4548466 | 0.324559334 | 0.125382307 | 2.588557681 | 0.00963788  | 0.019643397 |
| Gm36961       | 1.950188293 | 0.324390325 | 1.422708565 | 0.228008977 | 0.819639262 | 0.86532141  |
| Gsr           | 1503.844428 | 0.323782838 | 0.188012121 | 1.722138104 | 0.085044504 | 0.134356288 |
| Zfp446        | 137.4798389 | 0.323756912 | 0.242729142 | 1.333819702 | 0.182262952 | 0.256603458 |
| Pitpnm2       | 969.7510809 | 0.323511889 | 0.228127717 | 1.418117418 | 0.156156487 | 0.225377226 |
| Vstm2b        | 0.609713624 | 0.323287335 | 2.440561217 | 0.132464342 | 0.894617026 | NA          |
| Cep95         | 183.3462082 | 0.323164279 | 0.224827239 | 1.437389351 | 0.150607393 | 0.21860833  |
| Psmg4         | 121.6245474 | 0.323120934 | 0.203254014 | 1.589739497 | 0.111893537 | 0.170029505 |
| Olfr1033      | 2022.737456 | 0.322799119 | 0.283432735 | 1.138891451 | 0.254748432 | 0.339611453 |
| Colec11       | 334.6899385 | 0.322474631 | 0.306354612 | 1.052618823 | 0.292515727 | 0.381774137 |
| Catsper3      | 1.048698594 | 0.32247262  | 2.179113399 | 0.147983404 | 0.882355865 | NA          |
| Gclc          | 6461.236342 | 0.321899941 | 0.363111049 | 0.886505498 | 0.375345193 | 0.467413064 |
| 3830406C13Rik | 326.2629662 | 0.32173396  | 0.231687176 | 1.388656745 | 0.164937153 | 0.235616607 |
| Trappc6a      | 320.4010199 | 0.321718215 | 0.18303822  | 1.757655941 | 0.078806069 | 0.12559464  |
| Jund          | 2699.214205 | 0.321576239 | 0.221171664 | 1.453966721 | 0.145955533 | 0.212852859 |
| Actr8         | 454.7983513 | 0.321486538 | 0.196839049 | 1.633245742 | 0.102417323 | 0.157553738 |
| Atpaf2        | 288.4576808 | 0.321036043 | 0.163472143 | 1.963857803 | 0.049546585 | 0.083711838 |
| Osbpl11       | 342.1893988 | 0.320857935 | 0.162896119 | 1.969708895 | 0.048871743 | 0.082778487 |
| Copz1         | 2604.813779 | 0.320635086 | 0.15693874  | 2.043058882 | 0.04104661  | 0.071027467 |
| Tmem167b      | 511.7492587 | 0.320577853 | 0.208761292 | 1.535619225 | 0.124631796 | 0.186264825 |
| Zfp84         | 147.3574371 | 0.320231873 | 0.220587667 | 1.451721564 | 0.146579041 | 0.213615959 |
| Zbtb20        | 2036.089388 | 0.320106624 | 0.185538615 | 1.72528303  | 0.084476479 | 0.133533149 |
| Gm42715       | 487.4045324 | 0.319610879 | 0.231950211 | 1.377928814 | 0.168225268 | 0.239671099 |
| Dusp22        | 256.4153751 | 0.319499902 | 0.244050144 | 1.309156784 | 0.190481248 | 0.266282854 |
| Yrdc          | 272.9944761 | 0.319187998 | 0.257591105 | 1.239126634 | 0.215298605 | 0.295120256 |
| Tmem92        | 0.418193151 | 0.318881353 | 3.131287556 | 0.101837135 | 0.91888595  | NA          |
| Fadd          | 163.1974542 | 0.318808573 | 0.220960798 | 1.442828669 | 0.149068741 | 0.216670125 |
| Setd1b        | 632.8268472 | 0.318763251 | 0.206544442 | 1.543315563 | 0.122754229 | 0.183829419 |
| Nudt18        | 241.8226509 | 0.318659325 | 0.282783595 | 1.126866377 | 0.259798981 | 0.344888104 |
| Rab17         | 321.2626368 | 0.318064453 | 0.187857381 | 1.693116621 | 0.090433271 | 0.141870471 |
| Ngrn          | 295.8851593 | 0.317789043 | 0.150964226 | 2.105061922 | 0.035285918 | 0.062060697 |
| Tagln3        | 6.501808457 | 0.317673886 | 0.917394105 | 0.346278535 | 0.729133399 | 0.792232965 |
| Rps8-ps1      | 0.749691653 | 0.317644562 | 2.398554573 | 0.132431659 | 0.894642875 | NA          |
| H4c12         | 4.3554145   | 0.317391936 | 0.932293517 | 0.340442072 | 0.73352364  | 0.795692989 |
| Zc3h8         | 60.94747987 | 0.317370708 | 0.347053727 | 0.9144714   | 0.360469199 | 0.45279096  |
| Gpkow         | 366.5746449 | 0.317173469 | 0.167563902 | 1.89285082  | 0.058377711 | 0.096501815 |
| Zfp27         | 94.72841723 | 0.317167563 | 0.258242383 | 1.228177805 | 0.219380229 | 0.300015574 |
| Cntn2         | 9.017406355 | 0.316651886 | 0.885756356 | 0.357493214 | 0.720722606 | 0.784953618 |
| Dgka          | 209.8190718 | 0.31644638  | 0.293651363 | 1.077626124 | 0.281200639 | 0.36884731  |
| 4933434E20Rik | 531.2673483 | 0.316243746 | 0.193742095 | 1.632292383 | 0.102617907 | 0.157791114 |
| Parp6         | 252.9841103 | 0.316163339 | 0.250961393 | 1.259808673 | 0.20773839  | 0.286299441 |
| Emc7          | 1159.650236 | 0.316145875 | 0.147530989 | 2.142911648 | 0.032120194 | 0.057236862 |
| Ppp3ca        | 795.5530445 | 0.315906424 | 0.196033366 | 1.611493136 | 0.107072282 | 0.163536261 |
| Cicn4         | 945.8873362 | 0.315878889 | 0.135387999 | 2.333138031 | 0.019640902 | 0.036994597 |
| Med18         | 32.55905404 | 0.315728464 | 0.323692514 | 0.975396247 | 0.329363744 | 0.421356229 |
| Ubac1         | 295.2311171 | 0.315673203 | 0.203246917 | 1.553151246 | 0.120387006 | 0.180872272 |
| Mis12         | 262.4417739 | 0.315613557 | 0.192434445 | 1.640109475 | 0.100982407 | 0.155655341 |
| Mmgt1         | 393.1889237 | 0.315485618 | 0.187716092 | 1.680653027 | 0.092830329 | 0.144910856 |
| Pisd-ps2      | 58.57043526 | 0.315392069 | 0.351608204 | 0.896998607 | 0.369719661 | 0.461939748 |



|               |             |             |             |             |             |             |
|---------------|-------------|-------------|-------------|-------------|-------------|-------------|
| Slc25a28      | 343.7175917 | 0.315239946 | 0.18583436  | 1.696349078 | 0.089819791 | 0.141011861 |
| Dop1a         | 329.2959831 | 0.31502328  | 0.2026368   | 1.554620286 | 0.12003653  | 0.180425212 |
| Tmem199       | 204.6942284 | 0.31492217  | 0.202685229 | 1.553749975 | 0.120244067 | 0.180705294 |
| Terf2ip       | 289.535015  | 0.314710153 | 0.163903769 | 1.920091011 | 0.054846405 | 0.091301778 |
| Ddx55         | 189.8588273 | 0.314207203 | 0.231039848 | 1.359969744 | 0.173839499 | 0.246577567 |
| Pdk4          | 186.7935192 | 0.314054054 | 0.298366115 | 1.052579492 | 0.29253376  | 0.381774137 |
| Gm21985       | 2.113823955 | 0.313922309 | 2.248583376 | 0.139608925 | 0.888968988 | 0.918660563 |
| Gm8242        | 1.250902465 | 0.313732812 | 2.183411468 | 0.143689275 | 0.88574584  | NA          |
| Rbm33         | 1240.719355 | 0.313420123 | 0.173264859 | 1.808907611 | 0.070465358 | 0.113781093 |
| Mttr9         | 307.1094908 | 0.313278024 | 0.165330956 | 1.894854006 | 0.058111746 | 0.096118079 |
| H2bc11        | 1.257444454 | 0.313206615 | 1.837725104 | 0.170431701 | 0.864670643 | NA          |
| Igln5         | 7.197009351 | 0.312545661 | 0.82678051  | 0.378027369 | 0.705410262 | 0.771777317 |
| 1600012H06Rik | 571.7077255 | 0.312475337 | 0.142872987 | 2.187084789 | 0.028736335 | 0.051808062 |
| Gnpat         | 755.2360539 | 0.312461532 | 0.122007705 | 2.560998349 | 0.010437185 | 0.021087122 |
| Senp3         | 799.5375993 | 0.312198131 | 0.199643525 | 1.563777895 | 0.117869737 | 0.177701033 |
| Nsd1          | 1465.151865 | 0.312057559 | 0.194672869 | 1.602984333 | 0.108938113 | 0.166086295 |
| Atp13a5       | 0.407843958 | 0.311888461 | 3.636644286 | 0.085762708 | 0.931655052 | NA          |
| Ttc13         | 430.107093  | 0.311839039 | 0.181089236 | 1.722018637 | 0.085066142 | 0.13437802  |
| Pcf11         | 594.1887621 | 0.31165355  | 0.145478879 | 2.142259768 | 0.032172584 | 0.057288304 |
| Tnpo3         | 900.9709813 | 0.311610118 | 0.152260218 | 2.046562922 | 0.040701019 | 0.070493885 |
| Stat5a        | 273.2136062 | 0.311587116 | 0.184019454 | 1.693229216 | 0.090411845 | 0.141849912 |
| Sik2          | 142.52311   | 0.311498913 | 0.214783835 | 1.450290302 | 0.146977582 | 0.214141853 |
| Ints9         | 197.1574584 | 0.311174407 | 0.233709498 | 1.331458112 | 0.183038319 | 0.25758934  |
| Uvssa         | 395.276998  | 0.31101937  | 0.206695447 | 1.504722893 | 0.132395335 | 0.195943716 |
| Smim9         | 1.890023851 | 0.311009719 | 1.405218175 | 0.221324863 | 0.824839492 | 0.869572919 |
| Golga4        | 1170.117382 | 0.31080866  | 0.147229129 | 2.11105413  | 0.03476766  | 0.061269285 |
| Miip          | 461.6702991 | 0.31061721  | 0.180903183 | 1.717035626 | 0.085972663 | 0.135659196 |
| Irf2bp2       | 2154.686272 | 0.31041761  | 0.160040558 | 1.939618393 | 0.052426084 | 0.087907925 |
| Rnf6          | 628.5641014 | 0.309950524 | 0.157104709 | 1.972891363 | 0.048507941 | 0.082268541 |
| Gpatch2       | 308.681751  | 0.309798414 | 0.173972908 | 1.780727914 | 0.074956911 | 0.120100133 |
| Gm10778       | 46.73591082 | 0.309759311 | 0.38004422  | 0.815061233 | 0.415037261 | 0.507171903 |
| Sf1           | 2448.784479 | 0.309331102 | 0.145272763 | 2.129312448 | 0.033228419 | 0.058928335 |
| Cdk5          | 419.3461284 | 0.308908344 | 0.191971858 | 1.609133486 | 0.107587157 | 0.164276386 |
| Ap3b2         | 5.077071561 | 0.308130164 | 0.832991508 | 0.36990793  | 0.711451093 | 0.777040056 |
| Pdap1         | 1025.098521 | 0.307819498 | 0.165402301 | 1.861035156 | 0.062739212 | 0.102735385 |
| Rala          | 463.1838097 | 0.307722295 | 0.206396647 | 1.490926814 | 0.135980711 | 0.200310996 |
| Zc3h14        | 1018.965297 | 0.307691554 | 0.176626012 | 1.742051183 | 0.081499489 | 0.129331032 |
| Exosc9        | 254.1466303 | 0.307592099 | 0.222679409 | 1.381322597 | 0.167179793 | 0.238420706 |
| Kctd6         | 272.9666117 | 0.307557497 | 0.244116304 | 1.259881015 | 0.207712288 | 0.286299441 |
| Mynn          | 170.1718642 | 0.307528149 | 0.173820356 | 1.769229771 | 0.076855538 | 0.122830525 |
| Tmem18        | 265.519305  | 0.30735491  | 0.229205466 | 1.340958031 | 0.179934079 | 0.25383645  |
| Brwd3         | 179.2088159 | 0.307200439 | 0.22593299  | 1.359697134 | 0.173925785 | 0.246679433 |
| Wdr27         | 11.48175577 | 0.307167374 | 0.582231999 | 0.527568692 | 0.597798728 | 0.680279869 |
| Gm17349       | 1.298678807 | 0.307141564 | 1.915412904 | 0.160352665 | 0.872603275 | NA          |
| Pop1          | 163.7053645 | 0.30695704  | 0.334200771 | 0.918480943 | 0.358367131 | 0.450814851 |
| Brwd1         | 398.28418   | 0.306942922 | 0.231596545 | 1.325334633 | 0.185060187 | 0.260069744 |
| Gemin7        | 349.5894905 | 0.306692626 | 0.162109594 | 1.891884491 | 0.058506373 | 0.096686375 |
| Cdc27         | 493.4313194 | 0.306662487 | 0.148858206 | 2.060097968 | 0.039389176 | 0.068493133 |
| Cbx4          | 508.5170663 | 0.306616515 | 0.300647171 | 1.01985498  | 0.307797243 | 0.398339589 |
| Tdp2          | 406.2032266 | 0.306399543 | 0.173687233 | 1.764087885 | 0.077717184 | 0.124068035 |
| Tyk2          | 555.0500912 | 0.306333977 | 0.152211043 | 2.012560798 | 0.044160855 | 0.075687177 |
| Ccr9          | 10.84289275 | 0.30612247  | 0.591049301 | 0.517930517 | 0.604506749 | 0.686127235 |
| Lrrc7         | 5.498503608 | 0.305748388 | 0.955214261 | 0.320083567 | 0.748904983 | 0.807956723 |
| Ppp1cc        | 1765.997111 | 0.305456045 | 0.165036334 | 1.850841185 | 0.064192404 | 0.104802921 |
| Olfr1352      | 3.32980621  | 0.304950113 | 1.207972984 | 0.252447792 | 0.800694963 | 0.850694736 |
| Accd          | 201.763725  | 0.30482369  | 0.178634943 | 1.706405728 | 0.087932565 | 0.138414706 |
| Tnni3         | 11.292858   | 0.304738637 | 0.669535231 | 0.455149517 | 0.649001676 | 0.724708726 |
| Trmt10a       | 125.923245  | 0.304727122 | 0.224999499 | 1.354345776 | 0.175626088 | 0.248718521 |
| Usp38         | 354.1862325 | 0.304461734 | 0.156385107 | 1.946871663 | 0.051550123 | 0.086677827 |
| Pgk1          | 4218.066978 | 0.304123924 | 0.130758583 | 2.325842919 | 0.020026932 | 0.03762609  |
| Usp40         | 660.5036293 | 0.304122856 | 0.171590036 | 1.772380628 | 0.076331395 | 0.122084401 |
| Spg7          | 693.4864281 | 0.303998924 | 0.188007826 | 1.616948244 | 0.105889453 | 0.161945223 |
| Smcp1         | 692.9988758 | 0.303935714 | 0.151739279 | 2.003012779 | 0.045175917 | 0.077255395 |
| Scmh1         | 219.421707  | 0.303824658 | 0.231122757 | 1.314559679 | 0.188657929 | 0.264210989 |
| Tmem203       | 156.0275181 | 0.303816052 | 0.262024118 | 1.159496513 | 0.246253857 | 0.330171904 |
| Ppp4r3b       | 705.1349333 | 0.303783126 | 0.180523428 | 1.682790594 | 0.092415636 | 0.144348249 |

|               |             |             |             |             |             |             |
|---------------|-------------|-------------|-------------|-------------|-------------|-------------|
| Actn2         | 7.427121514 | 0.303648313 | 0.790843593 | 0.383954951 | 0.701011837 | 0.768836861 |
| Sft2d1        | 562.259191  | 0.303610877 | 0.18710433  | 1.622682262 | 0.104657345 | 0.160435071 |
| Mapk1ip1      | 1223.077892 | 0.303598192 | 0.123336957 | 2.461534634 | 0.013834404 | 0.027074839 |
| Vti1a         | 236.7800476 | 0.303582023 | 0.206091092 | 1.473047767 | 0.140738156 | 0.206133489 |
| Tmem208       | 502.0224879 | 0.303518967 | 0.15415507  | 1.968919781 | 0.048962304 | 0.082898933 |
| Olfr1215      | 3.287394143 | 0.303506498 | 1.382777133 | 0.219490539 | 0.826267949 | 0.870701941 |
| Ikzf5         | 186.4152777 | 0.303401634 | 0.265654031 | 1.142093096 | 0.253415325 | 0.338257474 |
| Tubd1         | 57.78995818 | 0.303210878 | 0.310340082 | 0.977027768 | 0.328555405 | 0.420416764 |
| Gpr157        | 74.90017644 | 0.303080805 | 0.254332593 | 1.191671113 | 0.233390229 | 0.316182186 |
| R3hdm4        | 1046.180633 | 0.303029297 | 0.117180892 | 2.585995824 | 0.009709811 | 0.019765117 |
| Gm3695        | 1.900637862 | 0.303019918 | 1.508817126 | 0.200832767 | 0.840829341 | 0.88153225  |
| Gm47191       | 5.130329856 | 0.302915964 | 0.834611973 | 0.362942269 | 0.71664801  | 0.78116466  |
| Nceh1         | 467.4128846 | 0.302761397 | 0.214056668 | 1.414398341 | 0.157244977 | 0.226599207 |
| LT629153.6    | 4.241997748 | 0.302522306 | 0.936485497 | 0.323040033 | 0.746664924 | 0.806152224 |
| Zbtb16        | 446.9042151 | 0.302515058 | 0.721381384 | 0.419355233 | 0.674956536 | 0.746555442 |
| Bdp1          | 249.3910623 | 0.302079801 | 0.22500595  | 1.342541391 | 0.179420519 | 0.253292565 |
| Scin          | 2.083549961 | 0.301801754 | 1.286262653 | 0.234634624 | 0.814492333 | 0.86132779  |
| Rpl17-ps7     | 1.733068551 | 0.301522877 | 1.503890365 | 0.200495252 | 0.841093271 | 0.881692067 |
| Sec31a        | 2638.65791  | 0.301146615 | 0.203403111 | 1.480540849 | 0.138728968 | 0.20369059  |
| Gm48141       | 1.97864136  | 0.301089467 | 1.435409027 | 0.209758655 | 0.833856044 | 0.876388421 |
| Metap1        | 496.9892443 | 0.300893264 | 0.197646658 | 1.522379722 | 0.127913963 | 0.190302578 |
| Ppm1m         | 288.2096147 | 0.300870821 | 0.162651803 | 1.849784725 | 0.064344583 | 0.105041315 |
| Gm17084       | 26.90546964 | 0.300803464 | 0.402641846 | 0.747074522 | 0.455018579 | 0.545818516 |
| Hikeshi       | 274.7235444 | 0.300491093 | 0.309844579 | 0.96981233  | 0.332140046 | 0.424334795 |
| Ppp1r35       | 215.9008478 | 0.300435854 | 0.224011392 | 1.341163286 | 0.179867444 | 0.253797399 |
| Rtraf         | 1247.50989  | 0.300118156 | 0.150692022 | 1.991599497 | 0.046415019 | 0.079159988 |
| Map7d2        | 2.143066889 | 0.300037746 | 1.645296948 | 0.182360848 | 0.855299549 | 0.892850819 |
| Trim14        | 165.1044311 | 0.299640697 | 0.358482151 | 0.835859458 | 0.403233972 | 0.496234228 |
| Ap2m1         | 3951.089128 | 0.299443582 | 0.134868317 | 2.220266326 | 0.026400694 | 0.048064827 |
| 4930451G09Rik | 13.45072692 | 0.299283942 | 0.854153147 | 0.350386746 | 0.726048472 | 0.789644296 |
| Tut1          | 387.3825215 | 0.299279017 | 0.211326212 | 1.416194492 | 0.156718568 | 0.226035377 |
| Eif1ad        | 414.8012318 | 0.299217622 | 0.159691065 | 1.873728017 | 0.060967922 | 0.10019958  |
| 9430015G10Rik | 134.8011278 | 0.298822877 | 0.196469169 | 1.520965753 | 0.128268432 | 0.190763345 |
| Noc2l         | 786.3756086 | 0.298412485 | 0.150884867 | 1.977749596 | 0.047956962 | 0.081439415 |
| Dock5         | 370.9586623 | 0.298401578 | 0.174515513 | 1.709885685 | 0.087287014 | 0.137491362 |
| Cyb561d2      | 154.2883456 | 0.298081843 | 0.201610195 | 1.4785058   | 0.139272446 | 0.204224725 |
| Zfp758        | 107.1410387 | 0.29799296  | 0.217187507 | 1.37205387  | 0.170046668 | 0.241942548 |
| Dhodh         | 201.8742136 | 0.297907559 | 0.214085202 | 1.39153737  | 0.164062536 | 0.234642459 |
| Elov1         | 861.1308301 | 0.297348998 | 0.190741899 | 1.558907611 | 0.119018249 | 0.179147369 |
| Sbspon        | 1.933688589 | 0.297308266 | 1.467925265 | 0.202536378 | 0.839497422 | 0.880398133 |
| Tmem230       | 353.9375539 | 0.297172711 | 0.201577045 | 1.47423885  | 0.140417293 | 0.205708861 |
| Parl          | 544.7521043 | 0.296637084 | 0.159966152 | 1.854374066 | 0.063685662 | 0.104105204 |
| 4931428L18Rik | 3.750417088 | 0.296622278 | 1.072507994 | 0.276568827 | 0.782111204 | 0.83530362  |
| Dhx37         | 276.939672  | 0.296402797 | 0.285632109 | 1.037708256 | 0.2994059   | 0.389015455 |
| Gm5373        | 106.7511516 | 0.296402265 | 0.593875764 | 0.499098099 | 0.617710277 | 0.697722441 |
| Gm11510       | 1.034290032 | 0.296299051 | 2.224041933 | 0.133225479 | 0.894015061 | NA          |
| Zfyve19       | 389.3053535 | 0.29629267  | 0.187116886 | 1.583463027 | 0.113315967 | 0.171896456 |
| Adam4         | 10.91741773 | 0.296274936 | 0.654854261 | 0.452428812 | 0.650960094 | 0.726518343 |
| Ube2n-ps1     | 141.2456078 | 0.296234582 | 0.21123158  | 1.402416163 | 0.16079101  | 0.230778189 |
| Nek7          | 1089.140983 | 0.296057098 | 0.128972948 | 2.295497644 | 0.021704621 | 0.040426132 |
| Olfr1278      | 5.425913052 | 0.295808375 | 0.912611062 | 0.324134111 | 0.745836503 | 0.805512873 |
| Zfp873        | 74.23635276 | 0.295770195 | 0.305660423 | 0.967643086 | 0.333222651 | 0.425335412 |
| Pop4          | 318.1938023 | 0.295488295 | 0.153273177 | 1.927853918 | 0.053873299 | 0.089980602 |
| Epm2aip1      | 695.609519  | 0.295262779 | 0.163625707 | 1.804501165 | 0.071152777 | 0.114759937 |
| Atp6v0c       | 3401.660178 | 0.295014973 | 0.097259139 | 3.033287922 | 0.002419047 | 0.005624647 |
| B3galt6       | 59.36067362 | 0.294874088 | 0.318888569 | 0.92469319  | 0.355125523 | 0.447588612 |
| Manf          | 1730.981636 | 0.294824873 | 0.262932382 | 1.121295408 | 0.26216214  | 0.347457059 |
| Wdr7          | 308.3917038 | 0.294577859 | 0.163262156 | 1.804324201 | 0.071180498 | 0.114793788 |
| 1810014B01Rik | 73.69690807 | 0.29438847  | 0.281759232 | 1.044822803 | 0.296104874 | 0.385549216 |
| Max           | 519.320328  | 0.29437309  | 0.227899517 | 1.291679304 | 0.196468228 | 0.27308523  |
| Eapp          | 454.4860317 | 0.294087114 | 0.217500464 | 1.352121777 | 0.176336362 | 0.249579269 |
| Reln          | 384.3128849 | 0.294038778 | 0.448906871 | 0.655010643 | 0.512460902 | 0.601558456 |
| L3mbtl2       | 311.9806431 | 0.293736853 | 0.207602022 | 1.414903624 | 0.157096755 | 0.226408444 |
| Ppp2ca        | 1994.093502 | 0.29369964  | 0.103501013 | 2.837649911 | 0.0045447   | 0.009973654 |
| Gm47678       | 10.81911744 | 0.293113906 | 0.703671337 | 0.416549446 | 0.677007993 | 0.748338992 |
| Dnajb1        | 361.4769556 | 0.292936113 | 0.181005115 | 1.618385824 | 0.105579475 | 0.161558109 |

|               |             |             |             |             |             |             |
|---------------|-------------|-------------|-------------|-------------|-------------|-------------|
| Hoxb5         | 8.541718641 | 0.292790381 | 0.655721907 | 0.446516089 | 0.655224493 | 0.730273742 |
| Sh3d19        | 1387.21918  | 0.292746805 | 0.194873988 | 1.502236434 | 0.133036058 | 0.196823633 |
| Taz           | 797.7337606 | 0.292725633 | 0.258735077 | 1.131372044 | 0.257898533 | 0.342899251 |
| Atxn3         | 381.2712818 | 0.292501769 | 0.200390169 | 1.459661274 | 0.14438319  | 0.210830375 |
| Upf3b         | 483.9634325 | 0.29245951  | 0.198120586 | 1.476169217 | 0.139898471 | 0.205054521 |
| Hectd1        | 2173.17924  | 0.292413883 | 0.172775181 | 1.692453056 | 0.090559624 | 0.142029481 |
| Rora          | 867.5602341 | 0.292361341 | 0.154113249 | 1.897055201 | 0.057820653 | 0.095683022 |
| Mier1         | 564.2375913 | 0.291854045 | 0.174112816 | 1.676235275 | 0.093692117 | 0.146068881 |
| Fbxw7         | 178.3720159 | 0.291774436 | 0.166284016 | 1.754675186 | 0.079314883 | 0.126275693 |
| Sh2b1         | 1026.893789 | 0.291739789 | 0.151445717 | 1.926365404 | 0.054058764 | 0.090246162 |
| Leng8         | 3574.207231 | 0.291733363 | 0.173229341 | 1.684089016 | 0.092164467 | 0.144108945 |
| Arrdc4        | 124.3866193 | 0.291538499 | 0.318276154 | 0.915992278 | 0.359670945 | 0.451988078 |
| Fip1l1        | 643.6450302 | 0.291423558 | 0.205589038 | 1.417505333 | 0.156335236 | 0.225597013 |
| Tulp1         | 5.152244443 | 0.29130968  | 0.860265191 | 0.338627767 | 0.734890163 | 0.796820422 |
| C87414        | 4.310723972 | 0.291184934 | 0.969743014 | 0.300270206 | 0.763971058 | 0.820369022 |
| Commd7        | 458.1097975 | 0.29112211  | 0.215042647 | 1.353787791 | 0.17580409  | 0.248949923 |
| Slc25a3       | 4909.884701 | 0.291107859 | 0.120916212 | 2.407517187 | 0.016061406 | 0.030946525 |
| Il13ra2       | 3.362970616 | 0.290915292 | 1.351832073 | 0.215200762 | 0.829610797 | 0.873414739 |
| Foxo3         | 957.4823077 | 0.290913804 | 0.224662535 | 1.294892376 | 0.195357359 | 0.271918048 |
| Cd9912        | 434.5669131 | 0.290821749 | 0.196558294 | 1.479569968 | 0.138988046 | 0.203912927 |
| Pde12         | 177.0910508 | 0.290696481 | 0.196661107 | 1.478159486 | 0.139365095 | 0.204325434 |
| Usp7          | 1276.889914 | 0.290658645 | 0.157322083 | 1.84753875  | 0.064669097 | 0.105510458 |
| Olf1233       | 5.537045301 | 0.290590403 | 0.763839604 | 0.3804338   | 0.703623429 | 0.770465169 |
| Cep57         | 274.7239287 | 0.290574438 | 0.182965788 | 1.588135365 | 0.112255733 | 0.170549482 |
| Dhx32         | 565.7502185 | 0.290085414 | 0.182846545 | 1.58649656  | 0.112626712 | 0.171006429 |
| Borcs7        | 136.4810102 | 0.289632696 | 0.201451326 | 1.437730404 | 0.150510563 | 0.218504988 |
| Emc3          | 987.637573  | 0.289109366 | 0.148939588 | 1.941118334 | 0.052243926 | 0.087671468 |
| Rnf165        | 10.16539259 | 0.288780704 | 0.589371583 | 0.489980705 | 0.624147553 | 0.703362472 |
| Tmem170       | 214.4375498 | 0.288396687 | 0.171163379 | 1.684920503 | 0.09200391  | 0.143884291 |
| Gnao1         | 9.259648499 | 0.288336915 | 0.626453036 | 0.460269004 | 0.645323146 | 0.721407803 |
| Gm14324       | 30.2827993  | 0.288245059 | 0.358081413 | 0.804970736 | 0.420836567 | 0.512655087 |
| Ermard        | 291.3804556 | 0.287934604 | 0.184739318 | 1.558599472 | 0.119091208 | 0.179241363 |
| Sox6          | 274.2540897 | 0.287897695 | 0.193939507 | 1.484471624 | 0.137683846 | 0.202382669 |
| Msl1          | 929.1291872 | 0.287579879 | 0.161859662 | 1.776723582 | 0.07561373  | 0.121016042 |
| Igip          | 204.4363724 | 0.28746149  | 0.281014451 | 1.022942021 | 0.30633526  | 0.3966282   |
| Pnn           | 1454.869174 | 0.287173704 | 0.245713131 | 1.168735682 | 0.242510141 | 0.326227633 |
| 5730480H06Rik | 136.6580986 | 0.287061187 | 0.260024841 | 1.103976013 | 0.269603543 | 0.355963538 |
| Pnlcd1        | 43.67511469 | 0.287024468 | 0.413316533 | 0.694442262 | 0.487404898 | 0.577313882 |
| Kiss1r        | 15.06791684 | 0.286942706 | 0.662206833 | 0.433312813 | 0.664787531 | 0.738037108 |
| Gm15547       | 1.610852289 | 0.286931253 | 1.582547652 | 0.181309708 | 0.856124486 | NA          |
| Nrbp1         | 924.6301229 | 0.286807395 | 0.18037486  | 1.590063019 | 0.111820601 | 0.169933821 |
| Tbcc          | 176.1837018 | 0.286756636 | 0.19175032  | 1.495468882 | 0.134792115 | 0.198869405 |
| Tshz1         | 324.8413333 | 0.286429216 | 0.192334057 | 1.489227754 | 0.136427405 | 0.20084753  |
| Rab11fip3     | 400.5596712 | 0.286281504 | 0.248143945 | 1.153691277 | 0.248626761 | 0.332699296 |
| Pigo          | 296.9761537 | 0.285996732 | 0.22090163  | 1.294679137 | 0.19543094  | 0.271998258 |
| Gm12416       | 6.36768605  | 0.285931161 | 0.748486387 | 0.382012507 | 0.702452088 | 0.769775869 |
| Tsc1          | 574.4464862 | 0.285901335 | 0.184786    | 1.547202359 | 0.121814457 | 0.18264669  |
| Rbm39         | 2921.998057 | 0.285473226 | 0.149067201 | 1.915063974 | 0.055484345 | 0.092255644 |
| 4833420G17Rik | 747.4006844 | 0.285435024 | 0.167823297 | 1.700806919 | 0.08897925  | 0.139833909 |
| Rnpep         | 826.2510342 | 0.285207485 | 0.131949598 | 2.161488093 | 0.030657656 | 0.054854294 |
| Arfrp1        | 409.174832  | 0.285092796 | 0.159641567 | 1.785830609 | 0.074126689 | 0.11898337  |
| Ube2b         | 1507.531173 | 0.284962591 | 0.125776287 | 2.26563049  | 0.023474017 | 0.043352295 |
| Riok2         | 429.1453521 | 0.283923555 | 0.168563935 | 1.684367151 | 0.092110735 | 0.144038141 |
| Klhl12        | 343.2362538 | 0.283410065 | 0.163544671 | 1.732921422 | 0.083109636 | 0.131616635 |
| Fbxo30        | 191.2383513 | 0.282921196 | 0.246975491 | 1.145543612 | 0.25198404  | 0.336636934 |
| As3mt         | 642.7296568 | 0.282896075 | 0.180454601 | 1.567685576 | 0.11695453  | 0.176524198 |
| Rab1a         | 2714.101519 | 0.282832603 | 0.098465175 | 2.872412521 | 0.004073508 | 0.009034106 |
| Snrk          | 801.7289651 | 0.282457554 | 0.217295238 | 1.299879174 | 0.193642384 | 0.269839412 |
| Xntrpc        | 32.64146484 | 0.282395153 | 0.6646744   | 0.424862388 | 0.670936994 | 0.743460116 |
| Mphosph10     | 224.0137237 | 0.282319595 | 0.21498854  | 1.31318439  | 0.189120823 | 0.264685312 |
| Gm2862        | 1.106456326 | 0.281975004 | 2.15615306  | 0.130776896 | 0.895951801 | NA          |
| Taf2          | 490.6936163 | 0.281892423 | 0.214754402 | 1.312626984 | 0.189308672 | 0.264904723 |
| Bicd2         | 517.4013465 | 0.28170155  | 0.198378163 | 1.420022981 | 0.155600991 | 0.224788198 |
| Amn1          | 323.5747599 | 0.281383183 | 0.277509862 | 1.013957417 | 0.310603072 | 0.40142227  |
| Dido1         | 1219.584253 | 0.281302129 | 0.223022567 | 1.261316882 | 0.207194701 | 0.285873686 |
| Mblac1        | 19.92825661 | 0.281144375 | 0.511168333 | 0.550003505 | 0.58231697  | 0.665664954 |

|               |             |             |             |             |             |             |
|---------------|-------------|-------------|-------------|-------------|-------------|-------------|
| Gm16409       | 2.747037528 | 0.281045327 | 1.236063525 | 0.227371265 | 0.820135062 | 0.86563042  |
| Hscb          | 63.98130014 | 0.281018049 | 0.2920749   | 0.962143782 | 0.335977384 | 0.428114391 |
| Sugt1         | 592.3371773 | 0.280825569 | 0.188970257 | 1.486083438 | 0.137257053 | 0.201894584 |
| Hnrnpk        | 5416.555691 | 0.280710658 | 0.17223275  | 1.629833218 | 0.103136751 | 0.158474568 |
| Zfp944        | 228.0471689 | 0.280417464 | 0.244715949 | 1.145889612 | 0.25184083  | 0.33647198  |
| Heatr1        | 341.8750216 | 0.280337756 | 0.266568627 | 1.051653226 | 0.292958678 | 0.382211644 |
| Gm28693       | 1.099829048 | 0.280183119 | 2.235252368 | 0.125347421 | 0.900248512 | NA          |
| Tfip11        | 473.5442135 | 0.279963606 | 0.165133517 | 1.695377239 | 0.090003881 | 0.14128786  |
| Efr3a         | 797.3391473 | 0.279949093 | 0.181347035 | 1.543720262 | 0.122656116 | 0.183698626 |
| Rock1         | 645.291481  | 0.279597655 | 0.132573058 | 2.109008125 | 0.03494388  | 0.061554378 |
| Lcorl         | 212.0600451 | 0.279560473 | 0.335828564 | 0.832449953 | 0.405155016 | 0.497844927 |
| Gm4034        | 50.29920984 | 0.279449724 | 0.468770858 | 0.596132885 | 0.551086457 | 0.636728019 |
| Gm765         | 5.839407183 | 0.279312182 | 0.976064557 | 0.286161587 | 0.774754363 | 0.829609924 |
| Washc4        | 404.1335176 | 0.278400852 | 0.189786451 | 1.466916369 | 0.142398807 | 0.208253827 |
| Ubc3c         | 535.0914051 | 0.278339983 | 0.181217269 | 1.535946243 | 0.124551565 | 0.186193887 |
| Zfp280d       | 326.8671272 | 0.278276557 | 0.198889421 | 1.399152132 | 0.161767367 | 0.231885149 |
| Gm13423       | 4.473775446 | 0.278226589 | 0.845382323 | 0.329113328 | 0.742070031 | 0.802588701 |
| Vegfd         | 53.71780535 | 0.278167972 | 0.396904898 | 0.700842881 | 0.483401074 | 0.573750947 |
| Son           | 4985.87444  | 0.278161287 | 0.249029068 | 1.116983207 | 0.264001505 | 0.349568751 |
| Spop          | 1602.365688 | 0.278144284 | 0.149197632 | 1.864267418 | 0.06228416  | 0.102068669 |
| 1810013L24Rik | 772.9992393 | 0.277931136 | 0.14396668  | 1.930524037 | 0.05354194  | 0.089497303 |
| Scarb2        | 2246.121798 | 0.277803168 | 0.164282306 | 1.691010884 | 0.090834724 | 0.142376261 |
| Dgcr2         | 1146.342086 | 0.277401901 | 0.134977504 | 2.055171372 | 0.039862455 | 0.069217268 |
| H2bc6         | 22.02221908 | 0.277368072 | 0.579582306 | 0.478565457 | 0.632247797 | 0.710564997 |
| Sema3d        | 25.19561494 | 0.277319943 | 0.455657401 | 0.60861503  | 0.54277964  | 0.629433868 |
| Armt1         | 238.3812207 | 0.277245704 | 0.181491435 | 1.527596625 | 0.126611272 | 0.188663024 |
| Nr2f1         | 16.20756155 | 0.277232542 | 0.638727501 | 0.434038837 | 0.664260239 | 0.737595815 |
| Retreg1       | 1393.731173 | 0.277105007 | 0.198565909 | 1.395531637 | 0.162855581 | 0.23320974  |
| Ubr5          | 1828.892464 | 0.27652563  | 0.169767418 | 1.628849829 | 0.103344813 | 0.15875134  |
| Gmeb2         | 423.9449781 | 0.276478872 | 0.208640757 | 1.32514316  | 0.185123673 | 0.260137519 |
| Tma16         | 194.4862778 | 0.276399621 | 0.222314853 | 1.243280047 | 0.213764654 | 0.293371424 |
| Ppip5k1       | 130.8687373 | 0.276064313 | 0.241976317 | 1.140873276 | 0.253922662 | 0.338775516 |
| Arfgap2       | 2078.857174 | 0.2758219   | 0.236229876 | 1.167599566 | 0.242968325 | 0.326640217 |
| Its2          | 799.0971607 | 0.275816142 | 0.178587789 | 1.544428895 | 0.122484464 | 0.18348289  |
| Zfp870        | 107.5229944 | 0.275780661 | 0.272111084 | 1.013485584 | 0.310828278 | 0.401601525 |
| H3c15         | 25.52884449 | 0.275440844 | 0.635387614 | 0.433500493 | 0.664651208 | 0.737933819 |
| Ipo7          | 1384.240263 | 0.275124127 | 0.135863251 | 2.025007692 | 0.042866574 | 0.073757505 |
| Kbtbd4        | 234.2951171 | 0.275068473 | 0.225423772 | 1.220228328 | 0.222378331 | 0.303312728 |
| Kpna3         | 533.7253356 | 0.274938351 | 0.153078106 | 1.796065803 | 0.072484052 | 0.116664287 |
| Hnrnpa2b1     | 7831.287734 | 0.274852765 | 0.207691144 | 1.323372578 | 0.185711506 | 0.260748621 |
| Bloc1s2       | 317.0178416 | 0.274703    | 0.156268917 | 1.757886371 | 0.078766845 | 0.125543865 |
| Nol9          | 306.4556567 | 0.274340643 | 0.22585694  | 1.214665546 | 0.224493678 | 0.305884603 |
| Kdm5b         | 633.9894934 | 0.274123514 | 0.193171937 | 1.419064895 | 0.155880097 | 0.22510466  |
| Exos1         | 213.0364295 | 0.273956323 | 0.202176063 | 1.35503837  | 0.175405332 | 0.248488458 |
| Arl5b         | 510.3456509 | 0.273803312 | 0.173656809 | 1.576692065 | 0.114866397 | 0.173926844 |
| Mug2          | 15213.31581 | 0.273543918 | 0.424713284 | 0.644067253 | 0.519531824 | 0.608058392 |
| Ubn1          | 617.6027149 | 0.273366079 | 0.124376306 | 2.197895148 | 0.027956579 | 0.05057877  |
| Lrp5          | 929.0251541 | 0.272821713 | 0.178811932 | 1.525746686 | 0.127072963 | 0.189249573 |
| Vip           | 0.92104732  | 0.272206491 | 1.945999499 | 0.139880042 | 0.88875477  | NA          |
| Orc4          | 424.3262252 | 0.272137592 | 0.166362313 | 1.635812748 | 0.101878783 | 0.156796018 |
| Ddx59         | 86.51178756 | 0.272066428 | 0.240036575 | 1.133437385 | 0.257030622 | 0.341958642 |
| Zfp119a       | 50.21166073 | 0.271983593 | 0.295389927 | 0.920761231 | 0.3571751   | 0.449580708 |
| Trgc3         | 0.103896866 | 0.271633688 | 3.645324405 | 0.074515642 | 0.940600095 | NA          |
| Arpc1a        | 836.7778416 | 0.271311661 | 0.153807082 | 1.763973789 | 0.077736392 | 0.12408708  |
| Slc39a9       | 893.1075394 | 0.271140267 | 0.140949356 | 1.923671555 | 0.054395766 | 0.090699376 |
| Asnsd1        | 596.4002552 | 0.271074555 | 0.161008899 | 1.683599826 | 0.092259032 | 0.144203904 |
| Rpl36-ps3     | 2.366731151 | 0.270812856 | 1.299660949 | 0.208371927 | 0.834938574 | 0.877127977 |
| Arhgap6       | 121.6194241 | 0.270320712 | 0.379631022 | 0.712061702 | 0.476426568 | 0.567020152 |
| Gclm          | 3698.830569 | 0.270283346 | 0.171973057 | 1.571660997 | 0.116029192 | 0.175469322 |
| Fam192a       | 516.622815  | 0.269998134 | 0.143513384 | 1.881344623 | 0.059925055 | 0.098715077 |
| Ntn1          | 90.98836072 | 0.26999467  | 0.296883282 | 0.909430362 | 0.363123001 | 0.455587351 |
| Cd81          | 5490.067437 | 0.269594057 | 0.126424197 | 2.132456157 | 0.032969365 | 0.058535902 |
| Vps45         | 129.5893788 | 0.269541937 | 0.38444455  | 0.701120455 | 0.483227846 | 0.573641691 |
| Vtn           | 50507.51398 | 0.269263859 | 0.178564101 | 1.507939483 | 0.131570016 | 0.194883001 |
| Psmb9         | 311.6087785 | 0.26901982  | 0.332034552 | 0.810216342 | 0.417815847 | 0.509471752 |
| Gm44487       | 2.045710271 | 0.268946501 | 1.666354453 | 0.161398135 | 0.871779836 | 0.90501173  |

|               |             |             |             |             |             |             |
|---------------|-------------|-------------|-------------|-------------|-------------|-------------|
| Nsmce4a       | 597.1228158 | 0.268876975 | 0.162913428 | 1.65042856  | 0.098855314 | 0.152901959 |
| Speer6-ps1    | 2.895035979 | 0.268849981 | 1.314968773 | 0.20445351  | 0.837999118 | 0.879259537 |
| Nudt10        | 1.309281005 | 0.268839145 | 1.755030527 | 0.153182034 | 0.878254726 | NA          |
| Trmt1         | 745.1184433 | 0.268754568 | 0.148088625 | 1.814822494 | 0.069551192 | 0.112528113 |
| Olfr1389      | 2.026070384 | 0.268552778 | 1.405511189 | 0.191071249 | 0.848469773 | 0.887569042 |
| Ptges2        | 293.6043301 | 0.268196889 | 0.31417746  | 0.853647774 | 0.393300179 | 0.485868222 |
| Prc           | 366.8396994 | 0.268108464 | 0.17241957  | 1.554976991 | 0.119951549 | 0.180329278 |
| Fez2          | 606.1403356 | 0.268028282 | 0.160870752 | 1.666109465 | 0.095691614 | 0.148723733 |
| Cdk5r1        | 10.63815871 | 0.267986712 | 0.630512472 | 0.425029993 | 0.67081481  | 0.743373043 |
| Gm8890        | 0.033201576 | 0.26777378  | 3.640642675 | 0.073551239 | 0.941367471 | NA          |
| Zbtb41        | 278.8022212 | 0.267737366 | 0.175676919 | 1.524032686 | 0.127500546 | 0.189832071 |
| Igfbp5        | 171.3501544 | 0.267666414 | 0.343862378 | 0.778411455 | 0.436326488 | 0.527739905 |
| Dpy19l4       | 218.0167506 | 0.267303024 | 0.237385447 | 1.126029532 | 0.260153019 | 0.345277436 |
| Olfr1175      | 24.42761172 | 0.26701119  | 0.40903738  | 0.652779435 | 0.513898484 | 0.602756091 |
| Snrpa         | 766.3260904 | 0.2670059   | 0.18738978  | 1.424869062 | 0.154195054 | 0.223037272 |
| Hdac3         | 931.8602377 | 0.266821121 | 0.17460748  | 1.528119644 | 0.126482835 | 0.188502436 |
| Lrfr3         | 179.8426556 | 0.266819708 | 0.256430141 | 1.040516172 | 0.298100155 | 0.387703039 |
| Zfp109        | 29.18773071 | 0.266714513 | 0.346959932 | 0.768718486 | 0.442060448 | 0.533199839 |
| Fhit          | 74.57881238 | 0.266525373 | 0.299606159 | 0.88958576  | 0.373688355 | 0.465894331 |
| Olfr1286      | 4.251052492 | 0.266372178 | 1.009810138 | 0.263784416 | 0.791946043 | 0.843186119 |
| Lig3          | 560.1991698 | 0.266342093 | 0.147807569 | 1.801951653 | 0.071553013 | 0.115318185 |
| Ears2         | 225.4912807 | 0.266239392 | 0.242890121 | 1.096131004 | 0.273021448 | 0.359769032 |
| Snrp2         | 625.4266021 | 0.266154197 | 0.199996172 | 1.330796453 | 0.183255995 | 0.257789274 |
| Mark3         | 729.8360302 | 0.26612098  | 0.198341167 | 1.341733461 | 0.179682433 | 0.253599315 |
| Olfr472       | 38.58017794 | 0.266063326 | 0.39088651  | 0.680666431 | 0.496082582 | 0.585863666 |
| Mga           | 611.0289665 | 0.264648614 | 0.227142057 | 1.165123787 | 0.243968889 | 0.327624652 |
| 2310009B15Rik | 102.9450008 | 0.264552547 | 0.283069289 | 0.93458583  | 0.350001784 | 0.442479082 |
| Ramac         | 621.646981  | 0.264502245 | 0.145779209 | 1.814403077 | 0.069615692 | 0.112589728 |
| Foxo1         | 553.8514456 | 0.26438164  | 0.311261436 | 0.849387716 | 0.395665586 | 0.488412693 |
| Nfyc          | 529.9561762 | 0.264347424 | 0.211494805 | 1.249900315 | 0.211335964 | 0.290435753 |
| Herc2         | 888.7540691 | 0.264111614 | 0.162601345 | 1.624289232 | 0.104314094 | 0.160009599 |
| Zfp949        | 147.6374455 | 0.264059285 | 0.275390839 | 0.95885283  | 0.33763289  | 0.429867816 |
| Slc39a11      | 432.6569274 | 0.263934517 | 0.244379241 | 1.080020201 | 0.280133185 | 0.367693015 |
| Rpl10-ps3     | 9504.95647  | 0.263890922 | 0.148508408 | 1.776942642 | 0.075577677 | 0.120969697 |
| Ensa          | 865.5761934 | 0.263757895 | 0.217344284 | 1.213548802 | 0.224920068 | 0.306338365 |
| Zcchc17       | 239.1837563 | 0.263650202 | 0.286424988 | 0.920486036 | 0.357318827 | 0.449695213 |
| Vmn1r220      | 2.035464256 | 0.263510326 | 1.190259947 | 0.221388888 | 0.824789644 | 0.869572919 |
| Pdzd8         | 486.5663991 | 0.262973369 | 0.169687091 | 1.549754713 | 0.1212004   | 0.181869943 |
| Gmppa         | 721.79091   | 0.262720134 | 0.225135926 | 1.166940073 | 0.243234571 | 0.326894992 |
| Rwdd2b        | 134.9859694 | 0.26207452  | 0.244547596 | 1.071670807 | 0.283867917 | 0.371924325 |
| Zfp207        | 1899.823825 | 0.26202149  | 0.149044074 | 1.758013469 | 0.078475218 | 0.125521128 |
| 6430571L13Rik | 18.28085445 | 0.261973045 | 0.564780837 | 0.463849033 | 0.64275591  | 0.719575963 |
| Ccdc163       | 135.9359092 | 0.261846262 | 0.265444787 | 0.986443414 | 0.32391557  | 0.415258884 |
| Alkbh8        | 198.0743699 | 0.261621424 | 0.244698663 | 1.069157553 | 0.284998682 | 0.373226112 |
| Dpm2          | 423.9369368 | 0.260761612 | 0.149767203 | 1.74111292  | 0.081663787 | 0.129567635 |
| Sertad3       | 89.04195411 | 0.260539789 | 0.233973761 | 1.113542766 | 0.265475392 | 0.351329334 |
| Dcaf10        | 287.7469655 | 0.260339521 | 0.185293786 | 1.405009459 | 0.160018466 | 0.229842009 |
| Grm1          | 4.020970188 | 0.260175313 | 1.265429428 | 0.205602389 | 0.837101511 | 0.878750404 |
| Fnbp4         | 993.5732318 | 0.259973321 | 0.184890844 | 1.406090831 | 0.159697155 | 0.229438488 |
| Gm20683       | 77.60154258 | 0.259864125 | 0.342958886 | 0.757712179 | 0.448623306 | 0.539741011 |
| Lrp4          | 269.7430778 | 0.25972008  | 0.282505913 | 0.919343875 | 0.357915736 | 0.450346702 |
| Zfp69         | 19.57222939 | 0.259709834 | 0.449530428 | 0.577735828 | 0.563442486 | 0.648017777 |
| Vax2          | 3.732944737 | 0.259660876 | 1.074788216 | 0.241592596 | 0.80909586  | 0.85732278  |
| Gm11841       | 1.658761339 | 0.259286152 | 1.56940623  | 0.165212898 | 0.868776414 | 0.903138648 |
| Gm38431       | 42.22948337 | 0.258939801 | 0.397224193 | 0.651873187 | 0.514482983 | 0.603145081 |
| Derl1         | 2245.045744 | 0.258870485 | 0.193079591 | 1.340744939 | 0.180003279 | 0.253905005 |
| Pla2g4f       | 0.36039365  | 0.258850878 | 3.280022623 | 0.078917406 | 0.937098318 | NA          |
| Zfp951        | 107.7728623 | 0.258838431 | 0.271390256 | 0.953749907 | 0.340210251 | 0.432564766 |
| Tigd5         | 41.80287103 | 0.258785859 | 0.350925071 | 0.737439073 | 0.460855381 | 0.551383433 |
| Atp6v0a4      | 4.315392621 | 0.258481649 | 1.236858171 | 0.208982449 | 0.83446194  | 0.876897439 |
| Hs6st1        | 2290.739695 | 0.25847156  | 0.14781915  | 1.748566134 | 0.080366045 | 0.1277226   |
| Usp8          | 1057.39141  | 0.258433013 | 0.136323227 | 1.895737204 | 0.057994803 | 0.095952582 |
| Cda           | 151.4775139 | 0.258386651 | 0.311312949 | 0.829990052 | 0.406544408 | 0.49911919  |
| Scaf4         | 594.4248065 | 0.258097258 | 0.190663009 | 1.353682915 | 0.175837561 | 0.24897664  |
| Wdr48         | 579.3334655 | 0.257884537 | 0.131132643 | 1.966592995 | 0.049230152 | 0.083236698 |
| Zfp189        | 131.6916419 | 0.257039808 | 0.20823958  | 1.234346554 | 0.217073796 | 0.297386216 |



|               |             |             |             |             |             |             |
|---------------|-------------|-------------|-------------|-------------|-------------|-------------|
| Blmh          | 514.682205  | 0.256899735 | 0.157653348 | 1.629522856 | 0.10320238  | 0.158561119 |
| Zkscan5       | 267.9009375 | 0.256767479 | 0.198502356 | 1.293523581 | 0.195830034 | 0.272375819 |
| Ddx5          | 10991.0459  | 0.256730564 | 0.153237818 | 1.675373393 | 0.093860994 | 0.146305406 |
| Crocc         | 72.49302345 | 0.256688058 | 0.31013378  | 0.827668813 | 0.407858086 | 0.500371664 |
| Btbd2         | 467.244253  | 0.256585657 | 0.149958822 | 1.711040765 | 0.087073588 | 0.137193209 |
| Kifc2         | 349.6877998 | 0.25642107  | 0.486764916 | 0.526786262 | 0.598342024 | 0.680807237 |
| Chrn3         | 1.966650119 | 0.256360535 | 1.704873026 | 0.150369283 | 0.880473274 | 0.912242102 |
| Aldh1a7       | 5186.082656 | 0.256180134 | 0.205123377 | 1.248907545 | 0.211698892 | 0.290864177 |
| Napb          | 73.97666214 | 0.256167839 | 0.243436481 | 1.052298479 | 0.292662629 | 0.38188385  |
| Fbxo27        | 1.389859527 | 0.256113714 | 1.835879915 | 0.139504611 | 0.889051412 | NA          |
| Phf7          | 152.7322627 | 0.256086773 | 0.233088459 | 1.09866775  | 0.271913014 | 0.358512998 |
| Mcf2          | 3030.274426 | 0.255831656 | 0.16007866  | 1.598162151 | 0.110006895 | 0.167565899 |
| Zfp746        | 440.071784  | 0.25581573  | 0.161384233 | 1.585134594 | 0.112935757 | 0.17139934  |
| Prpf8         | 3303.40703  | 0.255787493 | 0.148005815 | 1.728225967 | 0.08394772  | 0.13280816  |
| Pym1          | 244.5153624 | 0.255779691 | 0.16024931  | 1.59613599  | 0.110458435 | 0.168175898 |
| Tenm3         | 174.8085901 | 0.255747217 | 0.283883399 | 0.900888247 | 0.367647741 | 0.460017475 |
| Slc35f1       | 6.475416268 | 0.255699208 | 0.897313594 | 0.28496081  | 0.775674167 | 0.830373199 |
| Cnot4         | 296.439282  | 0.25560504  | 0.156727887 | 1.630884233 | 0.102914749 | 0.158147706 |
| 1700019D03Rik | 1.17796782  | 0.255304064 | 2.246132431 | 0.113663852 | 0.909504269 | NA          |
| Cnot3         | 614.6820594 | 0.255118522 | 0.145781397 | 1.750007388 | 0.080117039 | 0.127362484 |
| Eif5b         | 1644.81483  | 0.254629274 | 0.155456787 | 1.637942468 | 0.101433696 | 0.156223836 |
| Map1lc3a      | 736.0899433 | 0.2544366   | 0.181427778 | 1.402412587 | 0.160792077 | 0.230778189 |
| Itih4         | 26190.62223 | 0.254353048 | 0.235738744 | 1.078961584 | 0.280604853 | 0.36823582  |
| Togaram1      | 242.0717237 | 0.254314715 | 0.321725857 | 0.790470239 | 0.429253196 | 0.520995906 |
| Nsmf          | 2620.320043 | 0.254276689 | 0.217783121 | 1.167568394 | 0.242980905 | 0.326640217 |
| Vps4a         | 403.2863846 | 0.25403     | 0.153767258 | 1.652042208 | 0.098525947 | 0.152461681 |
| Utp14b        | 136.2358334 | 0.253562461 | 0.254745074 | 0.995357662 | 0.319562342 | 0.411038087 |
| Klh1          | 2.044407567 | 0.253440423 | 1.226905039 | 0.206568899 | 0.836346552 | 0.878174181 |
| Arih2         | 695.1710555 | 0.25334829  | 0.128571445 | 1.970486458 | 0.048782646 | 0.082672828 |
| Fam57b        | 5.939488348 | 0.25331661  | 0.795761123 | 0.318332478 | 0.750232751 | 0.809063886 |
| Gata1         | 0.289392124 | 0.253289374 | 3.52161905  | 0.071924127 | 0.94266229  | NA          |
| Tfdp2         | 368.0489883 | 0.253216954 | 0.172535961 | 1.467618412 | 0.142207904 | 0.20799248  |
| Rps4l         | 522.3292769 | 0.253064663 | 0.398063452 | 0.635739509 | 0.524946221 | 0.613129908 |
| Sec23b        | 848.9579082 | 0.253008385 | 0.249635413 | 1.013511594 | 0.310815861 | 0.401601525 |
| Gm12901       | 2.414478368 | 0.252960568 | 1.414488596 | 0.178835353 | 0.858066985 | 0.894825803 |
| Larp1         | 2451.907526 | 0.252749721 | 0.136446506 | 1.852372248 | 0.063972388 | 0.104513777 |
| Lin54         | 128.901328  | 0.252463831 | 0.273083611 | 0.924492794 | 0.355229802 | 0.447660974 |
| Copg2         | 455.0827628 | 0.252135941 | 0.179072417 | 1.40801104  | 0.159127801 | 0.228716866 |
| Vcpip1        | 788.6427621 | 0.252123619 | 0.16536291  | 1.524668496 | 0.127341803 | 0.189633391 |
| Gtf2h3        | 250.4330201 | 0.25179667  | 0.247134155 | 1.01886633  | 0.30826643  | 0.398855958 |
| Lin52         | 167.8598096 | 0.251714464 | 0.372190037 | 0.676306292 | 0.498846198 | 0.588290675 |
| Phf8          | 472.9643708 | 0.251529336 | 0.326206757 | 0.771073348 | 0.440663457 | 0.531891151 |
| Lratd1        | 17.7055803  | 0.251474798 | 0.728014299 | 0.34542563  | 0.729774412 | 0.792765789 |
| Entpd4b       | 625.7845712 | 0.251380914 | 0.182828709 | 1.374953181 | 0.16914596  | 0.240862039 |
| Olfm3         | 66.31461773 | 0.251327184 | 0.553977109 | 0.453677923 | 0.650060659 | 0.725657027 |
| Srp54a        | 855.0707059 | 0.251211415 | 0.158369732 | 1.586233754 | 0.112686294 | 0.171081657 |
| Parp3         | 729.8583427 | 0.251031519 | 0.164106072 | 1.529690624 | 0.126093325 | 0.187987671 |
| Mark4         | 347.5207302 | 0.250383453 | 0.232166701 | 1.078464103 | 0.280826693 | 0.368441855 |
| Zfp770        | 121.3336273 | 0.250115106 | 0.273363754 | 0.914953437 | 0.360216075 | 0.452573045 |
| Zfp994        | 205.8986352 | 0.249697412 | 0.187516948 | 1.331599173 | 0.182991937 | 0.257545327 |
| Gm17893       | 1.079341614 | 0.249697237 | 1.855815418 | 0.13454853  | 0.892968838 | NA          |
| Stx4a         | 619.0880396 | 0.249639046 | 0.166579084 | 1.498621797 | 0.133971775 | 0.19788172  |
| Rundc1        | 245.0876386 | 0.249525417 | 0.199334753 | 1.251790837 | 0.21064609  | 0.289721222 |
| Tex261        | 1157.84463  | 0.249342011 | 0.152558617 | 1.634401358 | 0.102174603 | 0.157222912 |
| Gm20721       | 1.588293317 | 0.249282875 | 1.791615849 | 0.139138575 | 0.889340647 | NA          |
| Inmt          | 13594.40793 | 0.249226503 | 0.314494201 | 0.792467723 | 0.428088005 | 0.519988907 |
| Vmn1r58       | 20.28282979 | 0.249076829 | 0.421956897 | 0.590289744 | 0.554996414 | 0.640077074 |
| Olf986        | 67.89357121 | 0.248779096 | 0.328494329 | 0.75733148  | 0.448851295 | 0.539939097 |
| Kdelr1        | 1839.045203 | 0.248555187 | 0.121150308 | 2.05162653  | 0.040205972 | 0.06974874  |
| Olf960        | 7.613808468 | 0.248536336 | 0.62869933  | 0.395318277 | 0.692608012 | 0.761926915 |
| Arhgef12      | 2193.091101 | 0.24818152  | 0.117734774 | 2.107971255 | 0.035033476 | 0.061686707 |
| Slc39a1       | 1283.486464 | 0.248139191 | 0.184261017 | 1.346672207 | 0.178085827 | 0.251721017 |
| Psmb10        | 564.5700438 | 0.24812099  | 0.19891269  | 1.247386428 | 0.212255841 | 0.291464967 |
| Sars          | 1216.763575 | 0.248088748 | 0.185711267 | 1.3358842   | 0.181587126 | 0.255800473 |
| Tcf7l2        | 386.0943413 | 0.247788834 | 0.212510333 | 1.166008404 | 0.243611048 | 0.327275177 |
| Cfi           | 10947.09743 | 0.247708667 | 0.241182597 | 1.027058627 | 0.304392859 | 0.394472783 |

|               |             |             |             |             |             |             |
|---------------|-------------|-------------|-------------|-------------|-------------|-------------|
| M6pr          | 2111.222653 | 0.247316634 | 0.148929743 | 1.6606262   | 0.096788544 | 0.150141137 |
| Tdrd7         | 645.0992866 | 0.246447694 | 0.260147643 | 0.947337791 | 0.343466668 | 0.43586571  |
| Fgd4          | 333.2568748 | 0.246194718 | 0.187214437 | 1.315041308 | 0.18849602  | 0.264049314 |
| Rusc1         | 139.0657572 | 0.246137584 | 0.264848091 | 0.929353816 | 0.352705754 | 0.445072368 |
| Dnlz          | 426.0488332 | 0.245977115 | 0.209636117 | 1.173352753 | 0.240654376 | 0.324091618 |
| Gm45844       | 39.78014992 | 0.245868784 | 0.559562773 | 0.439394463 | 0.660375738 | 0.734766061 |
| Btbd6         | 233.4920034 | 0.245779726 | 0.204772346 | 1.20025839  | 0.230039005 | 0.312337126 |
| Fdxr          | 705.804082  | 0.245170165 | 0.300242856 | 0.816572851 | 0.414172575 | 0.506441979 |
| Ncor1         | 1583.276469 | 0.245144124 | 0.128090852 | 1.913830069 | 0.055641872 | 0.092473033 |
| Slc30a10      | 687.0595585 | 0.24488288  | 0.252364619 | 0.970353455 | 0.331870341 | 0.424085569 |
| Gm40466       | 5.088889984 | 0.244849812 | 0.914027945 | 0.267880006 | 0.788791684 | 0.840615155 |
| Dusp19        | 89.6217914  | 0.244496707 | 0.248607283 | 0.983465581 | 0.325378347 | 0.416789395 |
| Tprgl         | 780.0656883 | 0.244436995 | 0.155707069 | 1.569851625 | 0.116449634 | 0.175916157 |
| Arl8b         | 973.8744425 | 0.244423943 | 0.213657789 | 1.143997342 | 0.252624739 | 0.337387117 |
| Carhsp1       | 1823.975278 | 0.24435512  | 0.183560112 | 1.331199452 | 0.183123392 | 0.257666522 |
| Thap11        | 291.1425049 | 0.244328403 | 0.156122802 | 1.564975775 | 0.11758859  | 0.177308533 |
| Nthl1         | 106.6799313 | 0.244177839 | 0.217546933 | 1.122414532 | 0.261686229 | 0.347015155 |
| Bcl7b         | 277.0318726 | 0.244061547 | 0.232727776 | 1.048699694 | 0.294316355 | 0.383571992 |
| Erlin1        | 920.3216981 | 0.243977697 | 0.223617842 | 1.091047545 | 0.275251962 | 0.3621591   |
| Magee1        | 53.1278871  | 0.243552543 | 0.387749665 | 0.628117996 | 0.529926645 | 0.617806841 |
| Pibf1         | 88.12527775 | 0.243404075 | 0.255601893 | 0.952278064 | 0.34095598  | 0.433260103 |
| Slc25a40      | 104.0419103 | 0.243394894 | 0.283497638 | 0.858542935 | 0.390592733 | 0.483188804 |
| Ammecr1       | 1234.520733 | 0.243385883 | 0.128759363 | 1.890238337 | 0.058726092 | 0.096983193 |
| Mag           | 14.3820919  | 0.243351041 | 0.860163396 | 0.282912574 | 0.777243855 | 0.831631621 |
| Dcun1d3       | 246.2059631 | 0.243006797 | 0.240866035 | 1.00888777  | 0.313028461 | 0.404127922 |
| Sptlc1        | 393.0263633 | 0.242535457 | 0.130204306 | 1.862729929 | 0.062500273 | 0.102373621 |
| Adgrd1        | 15.75268269 | 0.242463879 | 0.506838717 | 0.478384683 | 0.632376434 | 0.710595461 |
| Slc35a2       | 271.1887122 | 0.242383927 | 0.15806134  | 1.533480149 | 0.125157594 | 0.186877867 |
| Gas7          | 220.5691182 | 0.242329217 | 0.29842336  | 0.812031663 | 0.416773463 | 0.508673683 |
| Tmem68        | 191.3870623 | 0.242150118 | 0.259740567 | 0.93227685  | 0.351193468 | 0.443525168 |
| Alkbh2        | 100.3347611 | 0.241784842 | 0.251913832 | 0.959791849 | 0.337159985 | 0.429428721 |
| Vps28         | 1185.700575 | 0.241783464 | 0.133627996 | 1.809377309 | 0.070392406 | 0.113705679 |
| Uckl1         | 463.2353219 | 0.241392036 | 0.178492861 | 1.352390424 | 0.176250451 | 0.249478387 |
| Rheb          | 822.5510207 | 0.241319277 | 0.179385987 | 1.345251551 | 0.178544014 | 0.252305897 |
| Pttg1ip       | 3329.225654 | 0.241238423 | 0.188938956 | 1.276806162 | 0.20167069  | 0.279337172 |
| Eif4e2        | 813.4704378 | 0.24110663  | 0.173566536 | 1.389130851 | 0.164792964 | 0.23548956  |
| Zfp952        | 117.7660906 | 0.241001151 | 0.216578263 | 1.112767035 | 0.265808497 | 0.351688262 |
| 2700062C07Rik | 157.9444493 | 0.240889364 | 0.223418974 | 1.07819564  | 0.280946457 | 0.368542259 |
| Tmem192       | 167.4381392 | 0.240578289 | 0.191155494 | 1.258547605 | 0.208193782 | 0.286758327 |
| Timm17a       | 512.1422022 | 0.240576672 | 0.197815737 | 1.216165487 | 0.223921888 | 0.305247109 |
| H2-B1         | 13.47392733 | 0.240344249 | 0.649076031 | 0.370286743 | 0.711168851 | 0.776881108 |
| Sulf2         | 236.2146928 | 0.240299536 | 0.259306647 | 0.926700258 | 0.354082184 | 0.446544834 |
| Ptp4a1        | 4204.670847 | 0.240193419 | 0.220276931 | 1.090415677 | 0.275530079 | 0.362385186 |
| Lyrn1         | 56.43972351 | 0.239880468 | 0.394296209 | 0.608376299 | 0.542937927 | 0.629574601 |
| Farsb         | 524.2004811 | 0.239776091 | 0.190486538 | 1.258756093 | 0.208118444 | 0.286730502 |
| Arhgap35      | 1366.902956 | 0.239695646 | 0.203417747 | 1.17834186  | 0.238660346 | 0.322040179 |
| Rbm12b2       | 153.5719803 | 0.23929794  | 0.327683025 | 0.730272615 | 0.465223564 | 0.555723051 |
| Sh3bp2        | 382.6652793 | 0.2392398   | 0.202605993 | 1.180813046 | 0.237677    | 0.320969384 |
| Kctd2         | 413.5774408 | 0.239154805 | 0.197550505 | 1.210600828 | 0.226048427 | 0.307604852 |
| Smim7         | 757.4344818 | 0.239113758 | 0.155183692 | 1.540843339 | 0.123354919 | 0.184631664 |
| Ahrr          | 11.85708831 | 0.239091181 | 0.685083686 | 0.348995583 | 0.727092625 | 0.790477334 |
| Gm40598       | 0.045208636 | 0.23908843  | 3.645704381 | 0.06558086  | 0.947711528 | NA          |
| Med27         | 116.7541083 | 0.238967372 | 0.195181395 | 1.224334789 | 0.220825958 | 0.301605587 |
| Rnf8          | 217.2685848 | 0.238906017 | 0.23678787  | 1.008945336 | 0.313000851 | 0.404127922 |
| Atxn2l        | 2343.573876 | 0.238842585 | 0.177613638 | 1.344731117 | 0.178712082 | 0.252501539 |
| Mppe1         | 104.2490567 | 0.238732224 | 0.240839988 | 0.991248279 | 0.321564361 | 0.412927782 |
| Polg          | 848.4623095 | 0.238727262 | 0.165967018 | 1.435662479 | 0.151098407 | 0.219246373 |
| lft52         | 478.2669386 | 0.237930565 | 0.161380345 | 1.474346615 | 0.14038829  | 0.205701725 |
| Mpdu1         | 884.3146435 | 0.237868701 | 0.153456464 | 1.550072869 | 0.121124027 | 0.181787342 |
| Tom1l2        | 670.6472339 | 0.237703342 | 0.178191825 | 1.333974453 | 0.182212229 | 0.256553856 |
| Dock8         | 630.83967   | 0.23769747  | 0.202025023 | 1.176574396 | 0.239365422 | 0.32276372  |
| Wars2         | 100.3576289 | 0.237644264 | 0.265211333 | 0.89605622  | 0.370222738 | 0.462385146 |
| Hnrnpdl       | 1573.380227 | 0.237565318 | 0.173076135 | 1.372605867 | 0.169874907 | 0.241718339 |
| Srsf5         | 6702.432648 | 0.237503709 | 0.250925804 | 0.946509706 | 0.343888674 | 0.436206407 |
| Top1          | 841.0025999 | 0.237444235 | 0.133959896 | 1.772502381 | 0.0763112   | 0.122063553 |
| Tmie          | 287.7234258 | 0.237412969 | 0.372173225 | 0.637909858 | 0.52353236  | 0.611816539 |

|               |             |             |             |             |                |             |
|---------------|-------------|-------------|-------------|-------------|----------------|-------------|
| Ghrhr         | 2.074630792 | 0.237342083 | 1.284467841 | 0.184778533 | 0.853402746    | 0.89152583  |
| Rmi2          | 37.34021072 | 0.236903571 | 0.423252351 | 0.559721808 | 0.575669205    | 0.659233466 |
| Bysl          | 272.9765561 | 0.236611302 | 0.208894217 | 1.13268479  | 0.257346647    | 0.342272246 |
| Zfp81         | 113.6351028 | 0.23660279  | 0.310121898 | 0.762934806 | 0.445502277    | 0.536591976 |
| Gpi1          | 3535.546936 | 0.236527295 | 0.132757101 | 1.781654563 | 0.074805581    | 0.11990274  |
| Zfp12         | 199.0559734 | 0.236281638 | 0.241308621 | 0.979167829 | 0.327497062    | 0.419219846 |
| 9130023H24Rik | 65.01691989 | 0.235689754 | 0.340558326 | 0.692068688 | 0.488894194    | 0.578747299 |
| Tob2          | 1218.557732 | 0.23564502  | 0.272270272 | 0.865482004 | 0.386774289    | 0.479021292 |
| Rabgga        | 616.4751983 | 0.234940902 | 0.201394788 | 1.166568926 | 0.243384498    | 0.327019146 |
| Rnf138        | 266.90411   | 0.234900437 | 0.254635627 | 0.922496353 | 0.356269732    | 0.448672999 |
| Egf           | 23.3117881  | 0.23482305  | 0.527939397 | 0.444791677 | 0.65647031     | 0.731327572 |
| Spn           | 603.4820423 | 0.234734791 | 0.259967535 | 0.902938864 | 0.366558343    | 0.45895172  |
| Dohh          | 344.8197882 | 0.234727858 | 0.231068213 | 1.015837943 | 0.309706564    | 0.400415404 |
| Srpk2         | 464.5519595 | 0.234617401 | 0.173109815 | 1.355309638 | 0.175318925    | 0.24838669  |
| Sfswap        | 761.9700454 | 0.234608534 | 0.265438934 | 0.883851249 | 0.376776517    | 0.468716145 |
| Mllt10        | 643.9922146 | 0.234527051 | 0.15479254  | 1.515105646 | 0.129745652    | 0.192657772 |
| Rad51d        | 251.8827866 | 0.234473036 | 0.225441816 | 1.040060092 | 0.298311983    | 0.387860181 |
| Mepce         | 592.5647012 | 0.234342496 | 0.207885957 | 1.127264676 | 0.259630593    | 0.344691406 |
| Gm45837       | 212.3482551 | 0.234192752 | 0.283193692 | 0.826970228 | 0.408253936    | 0.500713173 |
| Vmn1r13       | 108.5526693 | 0.233930556 | 0.415030561 | 0.56364658  | 0.57299468     | 0.656920868 |
| Phc3          | 603.0481309 | 0.233742174 | 0.152801343 | 1.529712821 | 0.126087829    | 0.187987671 |
| Cldnd1        | 317.7910534 | 0.233714866 | 0.166875287 | 1.400536113 | 0.161352837    | 0.231457568 |
| Lhfp14        | 7.264284916 | 0.233640543 | 0.762868957 | 0.306265632 | 0.759402405    | 0.816852306 |
| Trub2         | 207.2153783 | 0.233383147 | 0.323081906 | 0.722365265 | 0.470069937    | 0.560598271 |
| Oprk1         | 1.300628997 | 0.233316256 | 1.892905057 | 0.123258298 | 0.901902562 NA |             |
| Lrrc63        | 0.897573409 | 0.233261982 | 2.00170523  | 0.116531634 | 0.907231216 NA |             |
| Pate13        | 0.758701894 | 0.233065377 | 2.071017947 | 0.112536628 | 0.910397929 NA |             |
| Htr1b         | 1.993021112 | 0.233039291 | 1.412756561 | 0.164953608 | 0.868980498    | 0.903219019 |
| Dynl13        | 979.0800187 | 0.232964797 | 0.243822659 | 0.955468196 | 0.339340981    | 0.431743514 |
| Tma7          | 847.0540779 | 0.232753123 | 0.209992447 | 1.108388069 | 0.267694255    | 0.353881178 |
| Dnd1          | 15.24309253 | 0.232563101 | 0.489279905 | 0.47531709  | 0.634560979    | 0.712554049 |
| Mrps36        | 303.5862337 | 0.232459399 | 0.16979175  | 1.369085361 | 0.170972594    | 0.243041517 |
| Il18rap       | 61.71937534 | 0.232321752 | 0.308615828 | 0.75278625  | 0.451578371    | 0.542530519 |
| Atad2b        | 342.7768839 | 0.232155049 | 0.184275693 | 1.259824588 | 0.207732648    | 0.286299441 |
| Qars          | 1004.829662 | 0.232147694 | 0.156226706 | 1.485966773 | 0.13728791     | 0.201922455 |
| Selenos       | 1270.023177 | 0.232141562 | 0.195535345 | 1.187210228 | 0.235144707    | 0.317977867 |
| Tmem63b       | 1425.980382 | 0.232125719 | 0.198927832 | 1.166884074 | 0.243257188    | 0.326899617 |
| Kans13        | 1298.275048 | 0.231975854 | 0.170203825 | 1.362929731 | 0.172904658    | 0.245394489 |
| Cog2          | 378.003746  | 0.231858459 | 0.137689737 | 1.683919684 | 0.092197192    | 0.144138493 |
| Nfe211        | 1819.681028 | 0.23184885  | 0.213182804 | 1.087558876 | 0.276789894    | 0.363873697 |
| C87436        | 262.1137629 | 0.231790545 | 0.183558419 | 1.262761726 | 0.206674824    | 0.285248736 |
| Gm10409       | 0.045585252 | 0.23165914  | 3.645821804 | 0.063540994 | 0.949335717 NA |             |
| Gm3020        | 0.045585252 | 0.23165914  | 3.645821804 | 0.063540994 | 0.949335717 NA |             |
| Zfp947        | 47.25962495 | 0.231542412 | 0.380266467 | 0.608895162 | 0.542593931    | 0.629285328 |
| Vps8          | 155.7588929 | 0.231524562 | 0.238728705 | 0.969822889 | 0.332134781    | 0.424334795 |
| BC017158      | 520.5357161 | 0.231344358 | 0.149033161 | 1.552301227 | 0.120590165    | 0.181120205 |
| Gm11910       | 0.04512478  | 0.23123369  | 3.645632683 | 0.063427588 | 0.949426019 NA |             |
| Tomm40        | 797.0154725 | 0.231104191 | 0.191762558 | 1.205158055 | 0.228142292    | 0.310177413 |
| Gm13691       | 0.045614118 | 0.230948405 | 3.645830091 | 0.063345904 | 0.949491063 NA |             |
| Gm13693       | 0.045614118 | 0.230948405 | 3.645830091 | 0.063345904 | 0.949491063 NA |             |
| Gm13694       | 0.045614118 | 0.230948405 | 3.645830091 | 0.063345904 | 0.949491063 NA |             |
| Gm13695       | 0.045614118 | 0.230948405 | 3.645830091 | 0.063345904 | 0.949491063 NA |             |
| Gm13696       | 0.045614118 | 0.230948405 | 3.645830091 | 0.063345904 | 0.949491063 NA |             |
| Gm13697       | 0.045614118 | 0.230948405 | 3.645830091 | 0.063345904 | 0.949491063 NA |             |
| Gm13698       | 0.045614118 | 0.230948405 | 3.645830091 | 0.063345904 | 0.949491063 NA |             |
| Olf1r575      | 6.447339714 | 0.230828214 | 0.93431368  | 0.247056442 | 0.804864543    | 0.853847587 |
| Memo1         | 467.0388842 | 0.230408594 | 0.212882102 | 1.082329571 | 0.279106111    | 0.366579428 |
| Sec24c        | 1870.471453 | 0.230339324 | 0.144575504 | 1.593211287 | 0.11111128     | 0.169023915 |
| Mmadhc        | 917.7573518 | 0.230338877 | 0.176570884 | 1.304512227 | 0.192058993    | 0.268071207 |
| Hspa8         | 20251.90059 | 0.230245655 | 0.140608051 | 1.637499798 | 0.101526081    | 0.156309639 |
| D630036H23Rik | 3.20554555  | 0.230181791 | 1.028047282 | 0.22390195  | 0.822833599    | 0.867887594 |
| Gdi1          | 1449.81089  | 0.230075637 | 0.142329762 | 1.616497029 | 0.105986895    | 0.162065171 |
| Mettl2        | 158.2974513 | 0.229749067 | 0.180708516 | 1.271379297 | 0.203593744    | 0.281566168 |
| Ogfod3        | 141.4274037 | 0.229735166 | 0.238748406 | 0.962247958 | 0.335925064    | 0.42807972  |
| Gm13290       | 0.045559106 | 0.229729795 | 3.645801937 | 0.063012144 | 0.949756834 NA |             |
| Gm11662       | 0.045611488 | 0.229547934 | 3.645822296 | 0.06296191  | 0.949796836 NA |             |



|               |             |             |             |             |             |             |
|---------------|-------------|-------------|-------------|-------------|-------------|-------------|
| Pcid2         | 247.3174514 | 0.229544078 | 0.196583944 | 1.167664426 | 0.242942152 | 0.326640217 |
| Phactr4       | 670.9935342 | 0.229474147 | 0.119364597 | 1.922464054 | 0.054547392 | 0.090901656 |
| Brf2          | 101.146596  | 0.229441993 | 0.224206564 | 1.023350919 | 0.306141957 | 0.396438137 |
| Mboat7        | 684.9624102 | 0.229222883 | 0.166972729 | 1.372816296 | 0.169809464 | 0.241645387 |
| Jph3          | 0.045710242 | 0.229204809 | 3.645860645 | 0.062867134 | 0.949872307 | NA          |
| Olfr1279      | 0.045710242 | 0.229204809 | 3.645860645 | 0.062867134 | 0.949872307 | NA          |
| 1110032F04Rik | 0.045710242 | 0.229204809 | 3.645860645 | 0.062867134 | 0.949872307 | NA          |
| 1600014C23Rik | 0.045710242 | 0.229204809 | 3.645860645 | 0.062867134 | 0.949872307 | NA          |
| 1700019N19Rik | 0.045710242 | 0.229204809 | 3.645860645 | 0.062867134 | 0.949872307 | NA          |
| 1700034I23Rik | 0.045710242 | 0.229204809 | 3.645860645 | 0.062867134 | 0.949872307 | NA          |
| 1700034J05Rik | 0.045710242 | 0.229204809 | 3.645860645 | 0.062867134 | 0.949872307 | NA          |
| 1700071K01Rik | 0.045710242 | 0.229204809 | 3.645860645 | 0.062867134 | 0.949872307 | NA          |
| 1700091H14Rik | 0.045710242 | 0.229204809 | 3.645860645 | 0.062867134 | 0.949872307 | NA          |
| 1700125H20Rik | 0.045710242 | 0.229204809 | 3.645860645 | 0.062867134 | 0.949872307 | NA          |
| 4930503E14Rik | 0.045710242 | 0.229204809 | 3.645860645 | 0.062867134 | 0.949872307 | NA          |
| A730009L09Rik | 0.045710242 | 0.229204809 | 3.645860645 | 0.062867134 | 0.949872307 | NA          |
| Akap4         | 0.045710242 | 0.229204809 | 3.645860645 | 0.062867134 | 0.949872307 | NA          |
| Aldh3b2       | 0.045710242 | 0.229204809 | 3.645860645 | 0.062867134 | 0.949872307 | NA          |
| Ankrd33       | 0.045710242 | 0.229204809 | 3.645860645 | 0.062867134 | 0.949872307 | NA          |
| Asic1         | 0.045710242 | 0.229204809 | 3.645860645 | 0.062867134 | 0.949872307 | NA          |
| Asmt          | 0.045710242 | 0.229204809 | 3.645860645 | 0.062867134 | 0.949872307 | NA          |
| Atp6v1fnb     | 0.045710242 | 0.229204809 | 3.645860645 | 0.062867134 | 0.949872307 | NA          |
| BC048562      | 0.045710242 | 0.229204809 | 3.645860645 | 0.062867134 | 0.949872307 | NA          |
| BC051019      | 0.045710242 | 0.229204809 | 3.645860645 | 0.062867134 | 0.949872307 | NA          |
| Bpifb6        | 0.045710242 | 0.229204809 | 3.645860645 | 0.062867134 | 0.949872307 | NA          |
| Brinp1        | 0.045710242 | 0.229204809 | 3.645860645 | 0.062867134 | 0.949872307 | NA          |
| Cacng3        | 0.045710242 | 0.229204809 | 3.645860645 | 0.062867134 | 0.949872307 | NA          |
| Cacng5        | 0.045710242 | 0.229204809 | 3.645860645 | 0.062867134 | 0.949872307 | NA          |
| Cacng6        | 0.045710242 | 0.229204809 | 3.645860645 | 0.062867134 | 0.949872307 | NA          |
| Car6          | 0.045710242 | 0.229204809 | 3.645860645 | 0.062867134 | 0.949872307 | NA          |
| Ccnd3-ps      | 0.045710242 | 0.229204809 | 3.645860645 | 0.062867134 | 0.949872307 | NA          |
| Cdh22         | 0.045710242 | 0.229204809 | 3.645860645 | 0.062867134 | 0.949872307 | NA          |
| Cfap206       | 0.045710242 | 0.229204809 | 3.645860645 | 0.062867134 | 0.949872307 | NA          |
| Chrm4         | 0.045710242 | 0.229204809 | 3.645860645 | 0.062867134 | 0.949872307 | NA          |
| Cnpy1         | 0.045710242 | 0.229204809 | 3.645860645 | 0.062867134 | 0.949872307 | NA          |
| Cox7b2        | 0.045710242 | 0.229204809 | 3.645860645 | 0.062867134 | 0.949872307 | NA          |
| Cryaa         | 0.045710242 | 0.229204809 | 3.645860645 | 0.062867134 | 0.949872307 | NA          |
| Cycs-ps2      | 0.045710242 | 0.229204809 | 3.645860645 | 0.062867134 | 0.949872307 | NA          |
| Dbh           | 0.045710242 | 0.229204809 | 3.645860645 | 0.062867134 | 0.949872307 | NA          |
| Dgki          | 0.045710242 | 0.229204809 | 3.645860645 | 0.062867134 | 0.949872307 | NA          |
| Disp3         | 0.045710242 | 0.229204809 | 3.645860645 | 0.062867134 | 0.949872307 | NA          |
| Dnah14        | 0.045710242 | 0.229204809 | 3.645860645 | 0.062867134 | 0.949872307 | NA          |
| Drc7          | 0.045710242 | 0.229204809 | 3.645860645 | 0.062867134 | 0.949872307 | NA          |
| Epyc          | 0.045710242 | 0.229204809 | 3.645860645 | 0.062867134 | 0.949872307 | NA          |
| Fgf8          | 0.045710242 | 0.229204809 | 3.645860645 | 0.062867134 | 0.949872307 | NA          |
| Foxr2         | 0.045710242 | 0.229204809 | 3.645860645 | 0.062867134 | 0.949872307 | NA          |
| Fstl5         | 0.045710242 | 0.229204809 | 3.645860645 | 0.062867134 | 0.949872307 | NA          |
| G6pc2         | 0.045710242 | 0.229204809 | 3.645860645 | 0.062867134 | 0.949872307 | NA          |
| Gabbr3        | 0.045710242 | 0.229204809 | 3.645860645 | 0.062867134 | 0.949872307 | NA          |
| Gm10160       | 0.045710242 | 0.229204809 | 3.645860645 | 0.062867134 | 0.949872307 | NA          |
| Gm10181       | 0.045710242 | 0.229204809 | 3.645860645 | 0.062867134 | 0.949872307 | NA          |
| Gm10406       | 0.045710242 | 0.229204809 | 3.645860645 | 0.062867134 | 0.949872307 | NA          |
| Gm11011       | 0.045710242 | 0.229204809 | 3.645860645 | 0.062867134 | 0.949872307 | NA          |
| Gm11239       | 0.045710242 | 0.229204809 | 3.645860645 | 0.062867134 | 0.949872307 | NA          |
| Gm11281       | 0.045710242 | 0.229204809 | 3.645860645 | 0.062867134 | 0.949872307 | NA          |
| Gm11363       | 0.045710242 | 0.229204809 | 3.645860645 | 0.062867134 | 0.949872307 | NA          |
| Gm11475       | 0.045710242 | 0.229204809 | 3.645860645 | 0.062867134 | 0.949872307 | NA          |
| Gm11487       | 0.045710242 | 0.229204809 | 3.645860645 | 0.062867134 | 0.949872307 | NA          |
| Gm11488       | 0.045710242 | 0.229204809 | 3.645860645 | 0.062867134 | 0.949872307 | NA          |
| Gm11500       | 0.045710242 | 0.229204809 | 3.645860645 | 0.062867134 | 0.949872307 | NA          |
| Gm11502       | 0.045710242 | 0.229204809 | 3.645860645 | 0.062867134 | 0.949872307 | NA          |
| Gm11504       | 0.045710242 | 0.229204809 | 3.645860645 | 0.062867134 | 0.949872307 | NA          |
| Gm11540       | 0.045710242 | 0.229204809 | 3.645860645 | 0.062867134 | 0.949872307 | NA          |
| Gm11557       | 0.045710242 | 0.229204809 | 3.645860645 | 0.062867134 | 0.949872307 | NA          |
| Gm11698       | 0.045710242 | 0.229204809 | 3.645860645 | 0.062867134 | 0.949872307 | NA          |
| Gm11745       | 0.045710242 | 0.229204809 | 3.645860645 | 0.062867134 | 0.949872307 | NA          |







|             |             |             |             |             |             |             |    |
|-------------|-------------|-------------|-------------|-------------|-------------|-------------|----|
| Gm9386      | 0.045710242 | 0.229204809 | 3.645860645 | 0.062867134 | 0.949872307 | NA          |    |
| Gm9402      | 0.045710242 | 0.229204809 | 3.645860645 | 0.062867134 | 0.949872307 | NA          |    |
| Gm9767      | 0.045710242 | 0.229204809 | 3.645860645 | 0.062867134 | 0.949872307 | NA          |    |
| Gm9844      | 0.045710242 | 0.229204809 | 3.645860645 | 0.062867134 | 0.949872307 | NA          |    |
| Gm9945      | 0.045710242 | 0.229204809 | 3.645860645 | 0.062867134 | 0.949872307 | NA          |    |
| Gpr3        | 0.045710242 | 0.229204809 | 3.645860645 | 0.062867134 | 0.949872307 | NA          |    |
| Gpr87       | 0.045710242 | 0.229204809 | 3.645860645 | 0.062867134 | 0.949872307 | NA          |    |
| Grin3a      | 0.045710242 | 0.229204809 | 3.645860645 | 0.062867134 | 0.949872307 | NA          |    |
| H2-M10.2    | 0.045710242 | 0.229204809 | 3.645860645 | 0.062867134 | 0.949872307 | NA          |    |
| H2ac5-ps    | 0.045710242 | 0.229204809 | 3.645860645 | 0.062867134 | 0.949872307 | NA          |    |
| H2a11c      | 0.045710242 | 0.229204809 | 3.645860645 | 0.062867134 | 0.949872307 | NA          |    |
| H2a11d      | 0.045710242 | 0.229204809 | 3.645860645 | 0.062867134 | 0.949872307 | NA          |    |
| H2a11f      | 0.045710242 | 0.229204809 | 3.645860645 | 0.062867134 | 0.949872307 | NA          |    |
| H2a11h      | 0.045710242 | 0.229204809 | 3.645860645 | 0.062867134 | 0.949872307 | NA          |    |
| H2a11i      | 0.045710242 | 0.229204809 | 3.645860645 | 0.062867134 | 0.949872307 | NA          |    |
| Hcrt        | 0.045710242 | 0.229204809 | 3.645860645 | 0.062867134 | 0.949872307 | NA          |    |
| Heatr4      | 0.045710242 | 0.229204809 | 3.645860645 | 0.062867134 | 0.949872307 | NA          |    |
| Hoxd3       | 0.045710242 | 0.229204809 | 3.645860645 | 0.062867134 | 0.949872307 | NA          |    |
| Hspe1-ps2   | 0.045710242 | 0.229204809 | 3.645860645 | 0.062867134 | 0.949872307 | NA          |    |
| Htr2c       | 0.045710242 | 0.229204809 | 3.645860645 | 0.062867134 | 0.949872307 | NA          |    |
| Htr5b       | 0.045710242 | 0.229204809 | 3.645860645 | 0.062867134 | 0.949872307 | NA          |    |
| Ifnz        | 0.045710242 | 0.229204809 | 3.645860645 | 0.062867134 | 0.949872307 | NA          |    |
| Ighv1-37    | 0.045710242 | 0.229204809 | 3.645860645 | 0.062867134 | 0.949872307 | NA          |    |
| Ighv12-3    | 0.045710242 | 0.229204809 | 3.645860645 | 0.062867134 | 0.949872307 | NA          |    |
| Ighv7-4     | 0.045710242 | 0.229204809 | 3.645860645 | 0.062867134 | 0.949872307 | NA          |    |
| Igkv1-99    | 0.045710242 | 0.229204809 | 3.645860645 | 0.062867134 | 0.949872307 | NA          |    |
| Igkv4-54    | 0.045710242 | 0.229204809 | 3.645860645 | 0.062867134 | 0.949872307 | NA          |    |
| Igkv4-62    | 0.045710242 | 0.229204809 | 3.645860645 | 0.062867134 | 0.949872307 | NA          |    |
| Igkv4-69    | 0.045710242 | 0.229204809 | 3.645860645 | 0.062867134 | 0.949872307 | NA          |    |
| Igkv4-71    | 0.045710242 | 0.229204809 | 3.645860645 | 0.062867134 | 0.949872307 | NA          |    |
| Iglj3p      | 0.045710242 | 0.229204809 | 3.645860645 | 0.062867134 | 0.949872307 | NA          |    |
| Ii5         | 0.045710242 | 0.229204809 | 3.645860645 | 0.062867134 | 0.949872307 | NA          |    |
| Kcne11      | 0.045710242 | 0.229204809 | 3.645860645 | 0.062867134 | 0.949872307 | NA          |    |
| Kcnk12      | 0.045710242 | 0.229204809 | 3.645860645 | 0.062867134 | 0.949872307 | NA          |    |
| Klhl40      | 0.045710242 | 0.229204809 | 3.645860645 | 0.062867134 | 0.949872307 | NA          |    |
| Klkb11      | 0.045710242 | 0.229204809 | 3.645860645 | 0.062867134 | 0.949872307 | NA          |    |
| Klrb1-ps1   | 0.045710242 | 0.229204809 | 3.645860645 | 0.062867134 | 0.949872307 | NA          |    |
| Krt6a       | 0.045710242 | 0.229204809 | 3.645860645 | 0.062867134 | 0.949872307 | NA          |    |
| Krt78       | 0.045710242 | 0.229204809 | 3.645860645 | 0.062867134 | 0.949872307 | NA          |    |
| Krtap3-2    | 0.045710242 | 0.229204809 | 3.645860645 | 0.062867134 | 0.949872307 | NA          |    |
| Lcn9        | 0.045710242 | 0.229204809 | 3.645860645 | 0.062867134 | 0.949872307 | NA          |    |
| LT629152.4  | 0.045710242 | 0.229204809 | 3.645860645 | 0.062867134 | 0.949872307 | NA          |    |
|             | 10-Mar      | 0.045710242 | 0.229204809 | 3.645860645 | 0.062867134 | 0.949872307 | NA |
| Mipep-ps    | 0.045710242 | 0.229204809 | 3.645860645 | 0.062867134 | 0.949872307 | NA          |    |
| Morc2b      | 0.045710242 | 0.229204809 | 3.645860645 | 0.062867134 | 0.949872307 | NA          |    |
| Mrgpra4     | 0.045710242 | 0.229204809 | 3.645860645 | 0.062867134 | 0.949872307 | NA          |    |
| Mroh5       | 0.045710242 | 0.229204809 | 3.645860645 | 0.062867134 | 0.949872307 | NA          |    |
| Mt4         | 0.045710242 | 0.229204809 | 3.645860645 | 0.062867134 | 0.949872307 | NA          |    |
| Myog        | 0.045710242 | 0.229204809 | 3.645860645 | 0.062867134 | 0.949872307 | NA          |    |
| Nasp-ps1    | 0.045710242 | 0.229204809 | 3.645860645 | 0.062867134 | 0.949872307 | NA          |    |
| Nppc        | 0.045710242 | 0.229204809 | 3.645860645 | 0.062867134 | 0.949872307 | NA          |    |
| Npw         | 0.045710242 | 0.229204809 | 3.645860645 | 0.062867134 | 0.949872307 | NA          |    |
| Oas1d       | 0.045710242 | 0.229204809 | 3.645860645 | 0.062867134 | 0.949872307 | NA          |    |
| Oas1e       | 0.045710242 | 0.229204809 | 3.645860645 | 0.062867134 | 0.949872307 | NA          |    |
| Obox4-ps2   | 0.045710242 | 0.229204809 | 3.645860645 | 0.062867134 | 0.949872307 | NA          |    |
| Olf1259     | 0.045710242 | 0.229204809 | 3.645860645 | 0.062867134 | 0.949872307 | NA          |    |
| Olf1132     | 0.045710242 | 0.229204809 | 3.645860645 | 0.062867134 | 0.949872307 | NA          |    |
| Olf1186     | 0.045710242 | 0.229204809 | 3.645860645 | 0.062867134 | 0.949872307 | NA          |    |
| Olf1221     | 0.045710242 | 0.229204809 | 3.645860645 | 0.062867134 | 0.949872307 | NA          |    |
| Olf1235     | 0.045710242 | 0.229204809 | 3.645860645 | 0.062867134 | 0.949872307 | NA          |    |
| Olf1387-ps1 | 0.045710242 | 0.229204809 | 3.645860645 | 0.062867134 | 0.949872307 | NA          |    |
| Olf1430     | 0.045710242 | 0.229204809 | 3.645860645 | 0.062867134 | 0.949872307 | NA          |    |
| Olf1464     | 0.045710242 | 0.229204809 | 3.645860645 | 0.062867134 | 0.949872307 | NA          |    |
| Olf1478     | 0.045710242 | 0.229204809 | 3.645860645 | 0.062867134 | 0.949872307 | NA          |    |
| Olf1554     | 0.045710242 | 0.229204809 | 3.645860645 | 0.062867134 | 0.949872307 | NA          |    |
| Olf1576     | 0.045710242 | 0.229204809 | 3.645860645 | 0.062867134 | 0.949872307 | NA          |    |



|                |             |             |             |             |             |    |
|----------------|-------------|-------------|-------------|-------------|-------------|----|
| Olfr810        | 0.045710242 | 0.229204809 | 3.645860645 | 0.062867134 | 0.949872307 | NA |
| Olfr837        | 0.045710242 | 0.229204809 | 3.645860645 | 0.062867134 | 0.949872307 | NA |
| Olfr967        | 0.045710242 | 0.229204809 | 3.645860645 | 0.062867134 | 0.949872307 | NA |
| Opalin         | 0.045710242 | 0.229204809 | 3.645860645 | 0.062867134 | 0.949872307 | NA |
| Pabpc1l2b-ps   | 0.045710242 | 0.229204809 | 3.645860645 | 0.062867134 | 0.949872307 | NA |
| Pkd211         | 0.045710242 | 0.229204809 | 3.645860645 | 0.062867134 | 0.949872307 | NA |
| Pom12l12       | 0.045710242 | 0.229204809 | 3.645860645 | 0.062867134 | 0.949872307 | NA |
| Prdx2-ps1      | 0.045710242 | 0.229204809 | 3.645860645 | 0.062867134 | 0.949872307 | NA |
| Prss33         | 0.045710242 | 0.229204809 | 3.645860645 | 0.062867134 | 0.949872307 | NA |
| Psg20          | 0.045710242 | 0.229204809 | 3.645860645 | 0.062867134 | 0.949872307 | NA |
| Psg22          | 0.045710242 | 0.229204809 | 3.645860645 | 0.062867134 | 0.949872307 | NA |
| Rab7-ps1       | 0.045710242 | 0.229204809 | 3.645860645 | 0.062867134 | 0.949872307 | NA |
| Rpl17-ps1      | 0.045710242 | 0.229204809 | 3.645860645 | 0.062867134 | 0.949872307 | NA |
| Rpl19-ps12     | 0.045710242 | 0.229204809 | 3.645860645 | 0.062867134 | 0.949872307 | NA |
| Rpl21-ps12     | 0.045710242 | 0.229204809 | 3.645860645 | 0.062867134 | 0.949872307 | NA |
| Rpl27-ps1      | 0.045710242 | 0.229204809 | 3.645860645 | 0.062867134 | 0.949872307 | NA |
| Rpl32-ps       | 0.045710242 | 0.229204809 | 3.645860645 | 0.062867134 | 0.949872307 | NA |
| Rpl9-ps5       | 0.045710242 | 0.229204809 | 3.645860645 | 0.062867134 | 0.949872307 | NA |
| Rplp0-ps1      | 0.045710242 | 0.229204809 | 3.645860645 | 0.062867134 | 0.949872307 | NA |
| Rps19-ps1      | 0.045710242 | 0.229204809 | 3.645860645 | 0.062867134 | 0.949872307 | NA |
| Rps19-ps2      | 0.045710242 | 0.229204809 | 3.645860645 | 0.062867134 | 0.949872307 | NA |
| Rpsa-ps11      | 0.045710242 | 0.229204809 | 3.645860645 | 0.062867134 | 0.949872307 | NA |
| Rtp1           | 0.045710242 | 0.229204809 | 3.645860645 | 0.062867134 | 0.949872307 | NA |
| Sec14l3        | 0.045710242 | 0.229204809 | 3.645860645 | 0.062867134 | 0.949872307 | NA |
| Selenok-ps6    | 0.045710242 | 0.229204809 | 3.645860645 | 0.062867134 | 0.949872307 | NA |
| Serpina1f      | 0.045710242 | 0.229204809 | 3.645860645 | 0.062867134 | 0.949872307 | NA |
| Sh2d7          | 0.045710242 | 0.229204809 | 3.645860645 | 0.062867134 | 0.949872307 | NA |
| Slc10a4        | 0.045710242 | 0.229204809 | 3.645860645 | 0.062867134 | 0.949872307 | NA |
| Slc34a1        | 0.045710242 | 0.229204809 | 3.645860645 | 0.062867134 | 0.949872307 | NA |
| Slc36a3        | 0.045710242 | 0.229204809 | 3.645860645 | 0.062867134 | 0.949872307 | NA |
| Smco2          | 0.045710242 | 0.229204809 | 3.645860645 | 0.062867134 | 0.949872307 | NA |
| Sorcs1         | 0.045710242 | 0.229204809 | 3.645860645 | 0.062867134 | 0.949872307 | NA |
| Spata3         | 0.045710242 | 0.229204809 | 3.645860645 | 0.062867134 | 0.949872307 | NA |
| St6gal2        | 0.045710242 | 0.229204809 | 3.645860645 | 0.062867134 | 0.949872307 | NA |
| Tbx10          | 0.045710242 | 0.229204809 | 3.645860645 | 0.062867134 | 0.949872307 | NA |
| Tcstv1         | 0.045710242 | 0.229204809 | 3.645860645 | 0.062867134 | 0.949872307 | NA |
| Tex13c1        | 0.045710242 | 0.229204809 | 3.645860645 | 0.062867134 | 0.949872307 | NA |
| Traj3          | 0.045710242 | 0.229204809 | 3.645860645 | 0.062867134 | 0.949872307 | NA |
| Traj4          | 0.045710242 | 0.229204809 | 3.645860645 | 0.062867134 | 0.949872307 | NA |
| Trav12-2       | 0.045710242 | 0.229204809 | 3.645860645 | 0.062867134 | 0.949872307 | NA |
| Trav13-1       | 0.045710242 | 0.229204809 | 3.645860645 | 0.062867134 | 0.949872307 | NA |
| Trav14-1       | 0.045710242 | 0.229204809 | 3.645860645 | 0.062867134 | 0.949872307 | NA |
| Trav15-1-dv6-1 | 0.045710242 | 0.229204809 | 3.645860645 | 0.062867134 | 0.949872307 | NA |
| Trav3-1        | 0.045710242 | 0.229204809 | 3.645860645 | 0.062867134 | 0.949872307 | NA |
| Trav3d-3       | 0.045710242 | 0.229204809 | 3.645860645 | 0.062867134 | 0.949872307 | NA |
| Trav3n-3       | 0.045710242 | 0.229204809 | 3.645860645 | 0.062867134 | 0.949872307 | NA |
| Trav7-5        | 0.045710242 | 0.229204809 | 3.645860645 | 0.062867134 | 0.949872307 | NA |
| Trav9-1        | 0.045710242 | 0.229204809 | 3.645860645 | 0.062867134 | 0.949872307 | NA |
| Trgv5          | 0.045710242 | 0.229204809 | 3.645860645 | 0.062867134 | 0.949872307 | NA |
| Tssk3          | 0.045710242 | 0.229204809 | 3.645860645 | 0.062867134 | 0.949872307 | NA |
| Ttc24          | 0.045710242 | 0.229204809 | 3.645860645 | 0.062867134 | 0.949872307 | NA |
| Ttc34          | 0.045710242 | 0.229204809 | 3.645860645 | 0.062867134 | 0.949872307 | NA |
| U90926         | 0.045710242 | 0.229204809 | 3.645860645 | 0.062867134 | 0.949872307 | NA |
| Uba1y-ps1      | 0.045710242 | 0.229204809 | 3.645860645 | 0.062867134 | 0.949872307 | NA |
| Usp51          | 0.045710242 | 0.229204809 | 3.645860645 | 0.062867134 | 0.949872307 | NA |
| Vmn1r-ps5      | 0.045710242 | 0.229204809 | 3.645860645 | 0.062867134 | 0.949872307 | NA |
| Vmn2r-ps88     | 0.045710242 | 0.229204809 | 3.645860645 | 0.062867134 | 0.949872307 | NA |
| Vmn2r10        | 0.045710242 | 0.229204809 | 3.645860645 | 0.062867134 | 0.949872307 | NA |
| Wfdc16         | 0.045710242 | 0.229204809 | 3.645860645 | 0.062867134 | 0.949872307 | NA |
| Zfp422-ps      | 0.045710242 | 0.229204809 | 3.645860645 | 0.062867134 | 0.949872307 | NA |
| Zmat4          | 0.045710242 | 0.229204809 | 3.645860645 | 0.062867134 | 0.949872307 | NA |
| Zscan4d        | 0.045710242 | 0.229204809 | 3.645860645 | 0.062867134 | 0.949872307 | NA |
| Asb14          | 0.045710242 | 0.229204809 | 3.645860645 | 0.062867134 | 0.949872307 | NA |
| Bsx            | 0.045710242 | 0.229204809 | 3.645860645 | 0.062867134 | 0.949872307 | NA |
| Calm4          | 0.045710242 | 0.229204809 | 3.645860645 | 0.062867134 | 0.949872307 | NA |
| Ccnb3          | 0.045710242 | 0.229204809 | 3.645860645 | 0.062867134 | 0.949872307 | NA |

|            |             |             |             |             |             |    |
|------------|-------------|-------------|-------------|-------------|-------------|----|
| Cldn19     | 0.045710242 | 0.229204809 | 3.645860645 | 0.062867134 | 0.949872307 | NA |
| Cst8       | 0.045710242 | 0.229204809 | 3.645860645 | 0.062867134 | 0.949872307 | NA |
| Evx2       | 0.045710242 | 0.229204809 | 3.645860645 | 0.062867134 | 0.949872307 | NA |
| Gm11686    | 0.045710242 | 0.229204809 | 3.645860645 | 0.062867134 | 0.949872307 | NA |
| Gm12003    | 0.045710242 | 0.229204809 | 3.645860645 | 0.062867134 | 0.949872307 | NA |
| Gm12384    | 0.045710242 | 0.229204809 | 3.645860645 | 0.062867134 | 0.949872307 | NA |
| Gm12944    | 0.045710242 | 0.229204809 | 3.645860645 | 0.062867134 | 0.949872307 | NA |
| Gm13141    | 0.045710242 | 0.229204809 | 3.645860645 | 0.062867134 | 0.949872307 | NA |
| Gm13350    | 0.045710242 | 0.229204809 | 3.645860645 | 0.062867134 | 0.949872307 | NA |
| Gm15422    | 0.045710242 | 0.229204809 | 3.645860645 | 0.062867134 | 0.949872307 | NA |
| Gm15575    | 0.045710242 | 0.229204809 | 3.645860645 | 0.062867134 | 0.949872307 | NA |
| Gm17740    | 0.045710242 | 0.229204809 | 3.645860645 | 0.062867134 | 0.949872307 | NA |
| Gm18275    | 0.045710242 | 0.229204809 | 3.645860645 | 0.062867134 | 0.949872307 | NA |
| Gm26956    | 0.045710242 | 0.229204809 | 3.645860645 | 0.062867134 | 0.949872307 | NA |
| Gm32158    | 0.045710242 | 0.229204809 | 3.645860645 | 0.062867134 | 0.949872307 | NA |
| Gm37164    | 0.045710242 | 0.229204809 | 3.645860645 | 0.062867134 | 0.949872307 | NA |
| Gm4303     | 0.045710242 | 0.229204809 | 3.645860645 | 0.062867134 | 0.949872307 | NA |
| Gm4305     | 0.045710242 | 0.229204809 | 3.645860645 | 0.062867134 | 0.949872307 | NA |
| Gm4307     | 0.045710242 | 0.229204809 | 3.645860645 | 0.062867134 | 0.949872307 | NA |
| Gm44248    | 0.045710242 | 0.229204809 | 3.645860645 | 0.062867134 | 0.949872307 | NA |
| Gm45471    | 0.045710242 | 0.229204809 | 3.645860645 | 0.062867134 | 0.949872307 | NA |
| Gm45874    | 0.045710242 | 0.229204809 | 3.645860645 | 0.062867134 | 0.949872307 | NA |
| Gm48788    | 0.045710242 | 0.229204809 | 3.645860645 | 0.062867134 | 0.949872307 | NA |
| Gm5121     | 0.045710242 | 0.229204809 | 3.645860645 | 0.062867134 | 0.949872307 | NA |
| Gm5123     | 0.045710242 | 0.229204809 | 3.645860645 | 0.062867134 | 0.949872307 | NA |
| Gm5191     | 0.045710242 | 0.229204809 | 3.645860645 | 0.062867134 | 0.949872307 | NA |
| Gm5473     | 0.045710242 | 0.229204809 | 3.645860645 | 0.062867134 | 0.949872307 | NA |
| Gm5755     | 0.045710242 | 0.229204809 | 3.645860645 | 0.062867134 | 0.949872307 | NA |
| Gm6081     | 0.045710242 | 0.229204809 | 3.645860645 | 0.062867134 | 0.949872307 | NA |
| Gm6133     | 0.045710242 | 0.229204809 | 3.645860645 | 0.062867134 | 0.949872307 | NA |
| Gm7065     | 0.045710242 | 0.229204809 | 3.645860645 | 0.062867134 | 0.949872307 | NA |
| Gm8137     | 0.045710242 | 0.229204809 | 3.645860645 | 0.062867134 | 0.949872307 | NA |
| Gm8304     | 0.045710242 | 0.229204809 | 3.645860645 | 0.062867134 | 0.949872307 | NA |
| Gm8810     | 0.045710242 | 0.229204809 | 3.645860645 | 0.062867134 | 0.949872307 | NA |
| Gm9496     | 0.045710242 | 0.229204809 | 3.645860645 | 0.062867134 | 0.949872307 | NA |
| Gm9626     | 0.045710242 | 0.229204809 | 3.645860645 | 0.062867134 | 0.949872307 | NA |
| Igkv12-47  | 0.045710242 | 0.229204809 | 3.645860645 | 0.062867134 | 0.949872307 | NA |
| Lgals7     | 0.045710242 | 0.229204809 | 3.645860645 | 0.062867134 | 0.949872307 | NA |
| Lyg1       | 0.045710242 | 0.229204809 | 3.645860645 | 0.062867134 | 0.949872307 | NA |
| Map6d1     | 0.045710242 | 0.229204809 | 3.645860645 | 0.062867134 | 0.949872307 | NA |
| Neurod4    | 0.045710242 | 0.229204809 | 3.645860645 | 0.062867134 | 0.949872307 | NA |
| Nlrp4a     | 0.045710242 | 0.229204809 | 3.645860645 | 0.062867134 | 0.949872307 | NA |
| Obox7      | 0.045710242 | 0.229204809 | 3.645860645 | 0.062867134 | 0.949872307 | NA |
| Olfr1042   | 0.045710242 | 0.229204809 | 3.645860645 | 0.062867134 | 0.949872307 | NA |
| Olfr1256   | 0.045710242 | 0.229204809 | 3.645860645 | 0.062867134 | 0.949872307 | NA |
| Olfr1495   | 0.045710242 | 0.229204809 | 3.645860645 | 0.062867134 | 0.949872307 | NA |
| Olfr402    | 0.045710242 | 0.229204809 | 3.645860645 | 0.062867134 | 0.949872307 | NA |
| Olfr915    | 0.045710242 | 0.229204809 | 3.645860645 | 0.062867134 | 0.949872307 | NA |
| Oxct2a     | 0.045710242 | 0.229204809 | 3.645860645 | 0.062867134 | 0.949872307 | NA |
| Pinlyp     | 0.045710242 | 0.229204809 | 3.645860645 | 0.062867134 | 0.949872307 | NA |
| Rfpl4b     | 0.045710242 | 0.229204809 | 3.645860645 | 0.062867134 | 0.949872307 | NA |
| Rln1       | 0.045710242 | 0.229204809 | 3.645860645 | 0.062867134 | 0.949872307 | NA |
| Rpl1l      | 0.045710242 | 0.229204809 | 3.645860645 | 0.062867134 | 0.949872307 | NA |
| Rpl19-ps10 | 0.045710242 | 0.229204809 | 3.645860645 | 0.062867134 | 0.949872307 | NA |
| Rpl21-ps5  | 0.045710242 | 0.229204809 | 3.645860645 | 0.062867134 | 0.949872307 | NA |
| Rps11-ps4  | 0.045710242 | 0.229204809 | 3.645860645 | 0.062867134 | 0.949872307 | NA |
| Rps13-ps7  | 0.045710242 | 0.229204809 | 3.645860645 | 0.062867134 | 0.949872307 | NA |
| Shisal2b   | 0.045710242 | 0.229204809 | 3.645860645 | 0.062867134 | 0.949872307 | NA |
| Slc6a3     | 0.045710242 | 0.229204809 | 3.645860645 | 0.062867134 | 0.949872307 | NA |
| Taf7l      | 0.045710242 | 0.229204809 | 3.645860645 | 0.062867134 | 0.949872307 | NA |
| Tll2       | 0.045710242 | 0.229204809 | 3.645860645 | 0.062867134 | 0.949872307 | NA |
| Tomm20l    | 0.045710242 | 0.229204809 | 3.645860645 | 0.062867134 | 0.949872307 | NA |
| Trav14d-1  | 0.045710242 | 0.229204809 | 3.645860645 | 0.062867134 | 0.949872307 | NA |
| Trav14n-1  | 0.045710242 | 0.229204809 | 3.645860645 | 0.062867134 | 0.949872307 | NA |
| Trav6-6    | 0.045710242 | 0.229204809 | 3.645860645 | 0.062867134 | 0.949872307 | NA |
| Trav6d-6   | 0.045710242 | 0.229204809 | 3.645860645 | 0.062867134 | 0.949872307 | NA |

|               |             |             |             |             |              |    |             |
|---------------|-------------|-------------|-------------|-------------|--------------|----|-------------|
| Trp73         | 0.045710242 | 0.229204809 | 3.645860645 | 0.062867134 | 0.949872307  | NA |             |
| Ube2nl        | 0.045710242 | 0.229204809 | 3.645860645 | 0.062867134 | 0.949872307  | NA |             |
| Vstm2a        | 0.045710242 | 0.229204809 | 3.645860645 | 0.062867134 | 0.949872307  | NA |             |
| Zfp804a       | 0.045710242 | 0.229204809 | 3.645860645 | 0.062867134 | 0.949872307  | NA |             |
| Arhgef19      | 1140.029707 | 0.228958507 | 0.27849932  | 0.82211514  | 0.411011369  |    | 0.503262359 |
| 0610040J01Rik | 633.1708792 | 0.228850724 | 0.202598668 | 1.129576649 | 0.258654655  |    | 0.343663359 |
| Dmac2l        | 141.3806213 | 0.228500063 | 0.237231024 | 0.963196376 | 0.335448983  |    | 0.427600888 |
| Ppp6r1        | 1704.775262 | 0.228188574 | 0.120111662 | 1.899803646 | 0.057458892  |    | 0.095121305 |
| Ftsj3         | 841.9470538 | 0.228028267 | 0.246779552 | 0.924016048 | 0.355477961  |    | 0.447811503 |
| Gm4631        | 898.5903366 | 0.228025463 | 0.150280858 | 1.517328727 | 0.129183709  |    | 0.191979402 |
| Txn14a        | 279.1061445 | 0.227995818 | 0.264881414 | 0.860746755 | 0.389377536  |    | 0.481825378 |
| Klrc2         | 3.468366614 | 0.227981908 | 1.252551209 | 0.182014041 | 0.855571707  |    | 0.892900092 |
| Snrnp27       | 348.2099078 | 0.227932974 | 0.182229369 | 1.250802629 | 0.211006495  |    | 0.290102593 |
| Acs13         | 466.1266602 | 0.227861385 | 0.16146227  | 1.411236102 | 0.158175008  |    | 0.22767372  |
| Slc22a13b     | 8.736211375 | 0.227831948 | 0.666207925 | 0.341983245 | 0.732363502  |    | 0.794839125 |
| Rgs8          | 2.049694174 | 0.227669916 | 1.67541601  | 0.135888588 | 0.891909357  |    | 0.920638818 |
| Gorasp2       | 1861.616755 | 0.227299973 | 0.193222487 | 1.176363977 | 0.23944946   |    | 0.322800443 |
| Zmat5         | 152.5464513 | 0.227266628 | 0.212003953 | 1.071992406 | 0.283723443  |    | 0.371813149 |
| Sart1         | 819.5742917 | 0.227170585 | 0.132274002 | 1.717424297 | 0.085901675  |    | 0.135572279 |
| Pef1          | 807.5386958 | 0.22597439  | 0.141741517 | 1.594270997 | 0.110875351  |    | 0.168737991 |
| Tmx4          | 396.150174  | 0.225963069 | 0.228390508 | 0.98937154  | 0.322481393  |    | 0.413824825 |
| Mical3        | 532.7989035 | 0.225760212 | 0.210166892 | 1.074194937 | 0.282735321  |    | 0.370660701 |
| Wdr92         | 176.9304279 | 0.225706409 | 0.182959463 | 1.233641625 | 0.217336475  |    | 0.297650404 |
| Cyren         | 106.3626174 | 0.22570403  | 0.22465817  | 1.004655339 | 0.315062841  |    | 0.406323573 |
| Cnbd2         | 15.8335302  | 0.225668647 | 0.501721733 | 0.449788462 | 0.652862978  |    | 0.728070128 |
| Cwc25         | 237.2023708 | 0.22514333  | 0.174339086 | 1.291410519 | 0.196561365  |    | 0.27317761  |
| Mrfap1        | 2900.733289 | 0.224976648 | 0.162777748 | 1.382109355 | 0.166938127  |    | 0.238155747 |
| Ube2e1        | 485.8461585 | 0.224647199 | 0.184776502 | 1.215777961 | 0.224069516  |    | 0.305423932 |
| Gp9           | 1.826760616 | 0.22456156  | 1.655546338 | 0.135641966 | 0.892104328  |    | 0.920784318 |
| Tpt1          | 20204.51786 | 0.224403922 | 0.167548396 | 1.339337928 | 0.180460687  |    | 0.254487037 |
| Rab5if        | 1210.123365 | 0.224350105 | 0.247024608 | 0.908209537 | 0.363767526  |    | 0.456136767 |
| 2210408I21Rik | 32.47044712 | 0.223781265 | 0.483742619 | 0.462603988 | 0.643648249  |    | 0.720149331 |
| Cog5          | 281.1570121 | 0.223721207 | 0.206381889 | 1.084015694 | 0.27835784   |    | 0.365681164 |
| Pebp1         | 3704.433616 | 0.223520437 | 0.222721544 | 1.003586957 | 0.315577744  |    | 0.406864507 |
| Slc3a1        | 666.8776806 | 0.223242258 | 0.298484855 | 0.747918207 | 0.454509495  |    | 0.545360211 |
| Nfi3          | 424.6046165 | 0.223081338 | 0.304150049 | 0.733458168 | 0.463279033  |    | 0.553779938 |
| Tagap1        | 483.047478  | 0.223024286 | 0.260133166 | 0.857346602 | 0.391253361  |    | 0.483900703 |
| Mpp5          | 299.0220479 | 0.222386724 | 0.234321158 | 0.94906805  | 0.342586003  |    | 0.434974766 |
| Chd9          | 9000.630579 | 0.222011638 | 0.364270638 | 0.609468936 | 0.542213657  |    | 0.629002956 |
| Rnf121        | 331.4683711 | 0.221954233 | 0.223147871 | 0.99465091  | 0.319906077  |    | 0.411318518 |
| C330018D20Rik | 162.4071609 | 0.221803083 | 0.197743008 | 1.121673459 | 0.262001305  |    | 0.347328103 |
| AC133103.2    | 2.222447718 | 0.221621254 | 1.885153381 | 0.117561391 | 0.9606415198 |    | 0.931045749 |
| B230307C23Rik | 23.35848447 | 0.22140558  | 0.46833735  | 0.472748073 | 0.636392925  |    | 0.713811868 |
| 1700056E22Rik | 17.89760202 | 0.221334395 | 0.455761596 | 0.485636345 | 0.627225023  |    | 0.705990505 |
| Tmem215       | 1.314401554 | 0.221015651 | 1.689369238 | 0.130827321 | 0.89591191   | NA |             |
| Tmod2         | 15.56797948 | 0.220968392 | 0.544010109 | 0.406184349 | 0.684607153  |    | 0.755303005 |
| Mosmo         | 368.3822563 | 0.220876602 | 0.155127197 | 1.4238419   | 0.154492243  |    | 0.223383992 |
| Slc15a1       | 6.327006925 | 0.220876189 | 0.935026307 | 0.236224571 | 0.813258414  |    | 0.860343124 |
| Api5          | 1187.896455 | 0.220846439 | 0.135978288 | 1.624130167 | 0.104348031  |    | 0.160047254 |
| Arsk          | 166.3708481 | 0.220810995 | 0.213808009 | 1.032753617 | 0.301719215  |    | 0.391600807 |
| Itgb1bp1      | 194.916048  | 0.220606949 | 0.23313221  | 0.946274003 | 0.344008849  |    | 0.436293919 |
| Utp4          | 310.7621255 | 0.220251104 | 0.157589639 | 1.397624266 | 0.162225927  |    | 0.232425213 |
| Tbc1d9b       | 948.4077716 | 0.220036205 | 0.197486948 | 1.114181    | 0.265201545  |    | 0.351028161 |
| Zc3h15        | 946.7255916 | 0.219998495 | 0.131903373 | 1.66787619  | 0.095340307  |    | 0.148272355 |
| Arm9c9        | 142.8728761 | 0.219861024 | 0.213768338 | 1.02850135  | 0.303714056  |    | 0.393788384 |
| Chd1l         | 220.2769812 | 0.219761753 | 0.21387971  | 1.027501642 | 0.304184313  |    | 0.394352408 |
| Coa3          | 741.5297425 | 0.219579826 | 0.198528956 | 1.106034256 | 0.268711692  |    | 0.354978453 |
| Atg12         | 595.73731   | 0.219353397 | 0.144724423 | 1.515662614 | 0.129604686  |    | 0.192498753 |
| Nlrc5         | 676.1756124 | 0.219156417 | 0.29037391  | 0.754738663 | 0.450405803  |    | 0.541541585 |
| Snx21         | 214.318663  | 0.218690846 | 0.171123638 | 1.277969825 | 0.201260066  |    | 0.278813717 |
| Olf1r517      | 0.926588883 | 0.218565394 | 1.872194917 | 0.116742863 | 0.907063823  | NA |             |
| Alg14         | 242.401717  | 0.218512627 | 0.264973078 | 0.82465973  | 0.4095648    |    | 0.501920288 |
| Slc4a7        | 201.8021464 | 0.217949411 | 0.219325571 | 0.993725494 | 0.320356528  |    | 0.411624818 |
| Olf1r1276     | 0.76559412  | 0.217908206 | 2.070329419 | 0.105252915 | 0.916175124  | NA |             |
| Bag6          | 1928.653949 | 0.217783116 | 0.199996092 | 1.08893686  | 0.27618173   |    | 0.363186219 |
| Ankrd17       | 1144.024486 | 0.217697882 | 0.162626788 | 1.338634827 | 0.180689582  |    | 0.254675767 |



|               |             |             |             |             |             |             |
|---------------|-------------|-------------|-------------|-------------|-------------|-------------|
| Uggt1         | 1300.29386  | 0.217675922 | 0.142897163 | 1.523304713 | 0.127682489 | 0.190007949 |
| Coil          | 98.03813794 | 0.217234205 | 0.237048857 | 0.916411106 | 0.359451313 | 0.451811987 |
| Pum1          | 936.8481625 | 0.2170139   | 0.126084879 | 1.721173081 | 0.085219421 | 0.134570275 |
| Alkbh3        | 436.6226735 | 0.216981916 | 0.225556689 | 0.961983956 | 0.336057663 | 0.428184682 |
| Gm28043       | 158.7354938 | 0.216981271 | 0.184191871 | 1.178017625 | 0.23878958  | 0.322089149 |
| Agap3         | 592.7967654 | 0.216532686 | 0.182363693 | 1.187367304 | 0.235082771 | 0.317919331 |
| Zfp750        | 283.1696984 | 0.21647805  | 0.310213091 | 0.697836603 | 0.485279385 | 0.57567622  |
| Gm14322       | 15.79479836 | 0.216468513 | 0.513801391 | 0.42130776  | 0.673530364 | 0.745364859 |
| Med25         | 858.7587716 | 0.216219451 | 0.148746501 | 1.453610332 | 0.146054371 | 0.212960564 |
| Gm11032       | 2.496779487 | 0.216162373 | 1.161010129 | 0.186184743 | 0.852299888 | 0.890701189 |
| Hprt          | 1249.232359 | 0.216064494 | 0.198458105 | 1.088715897 | 0.276279189 | 0.363286357 |
| Anxa11        | 557.7435247 | 0.215918527 | 0.136321377 | 1.583893379 | 0.113217984 | 0.171766503 |
| Zfp91         | 1609.703038 | 0.215800311 | 0.15874148  | 1.359445002 | 0.174005619 | 0.246751605 |
| Lta4h         | 691.6048247 | 0.215792073 | 0.163316829 | 1.321309466 | 0.186398199 | 0.261518928 |
| Surf6         | 288.8327397 | 0.215595858 | 0.264460755 | 0.815228172 | 0.414941715 | 0.507171903 |
| Tmem140       | 643.1197697 | 0.215108424 | 0.222267344 | 0.967791399 | 0.33314856  | 0.425272681 |
| Cpsf1         | 1056.790043 | 0.214918394 | 0.208248899 | 1.032026559 | 0.302059676 | 0.391895994 |
| Map3k5        | 628.4498922 | 0.214785454 | 0.242201033 | 0.886806515 | 0.375183079 | 0.467279452 |
| Mab2113       | 5.231966299 | 0.21464387  | 0.800289659 | 0.268207726 | 0.788539428 | 0.840398861 |
| Dpp9          | 997.3682667 | 0.214623072 | 0.181519161 | 1.182371445 | 0.237058348 | 0.320210025 |
| Cdc26         | 369.6021244 | 0.214262939 | 0.183780296 | 1.165864588 | 0.243669199 | 0.327298495 |
| Plcd4         | 5.032662802 | 0.214184749 | 0.779796515 | 0.274667487 | 0.783571713 | 0.836272313 |
| Id2           | 2977.874337 | 0.213843001 | 0.216390188 | 0.988228733 | 0.323040639 | 0.414324986 |
| Plcg1         | 1161.257052 | 0.213833672 | 0.193005132 | 1.107917029 | 0.267897651 | 0.354040244 |
| Agk           | 152.2626826 | 0.213805131 | 0.307633028 | 0.695000574 | 0.487054942 | 0.576939456 |
| Sf3b1         | 2966.5308   | 0.213790264 | 0.088886386 | 2.404296914 | 0.016203607 | 0.031181746 |
| Bcl9l         | 989.7694139 | 0.213408323 | 0.162474265 | 1.313490002 | 0.189017888 | 0.264591935 |
| Rab13         | 124.8665258 | 0.213290157 | 0.202578091 | 1.052878704 | 0.292396588 | 0.381653551 |
| Gm12397       | 2.632037957 | 0.213077755 | 2.043659387 | 0.104262851 | 0.916960757 | 0.938597838 |
| Zfp384        | 861.0912854 | 0.212865852 | 0.133366267 | 1.596099646 | 0.110466548 | 0.168175898 |
| G430049J08Rik | 3.485980071 | 0.212827865 | 1.217537055 | 0.174801961 | 0.861235247 | 0.897234081 |
| Fibp          | 497.48873   | 0.212504029 | 0.150913579 | 1.408117348 | 0.159096325 | 0.228690906 |
| Ryk           | 698.168798  | 0.212418841 | 0.118649733 | 1.790301893 | 0.073405392 | 0.117957878 |
| Xrcc4         | 138.3604845 | 0.212303991 | 0.205089046 | 1.035179574 | 0.300585056 | 0.390190668 |
| Gm14429       | 1.109316297 | 0.212181369 | 2.122718858 | 0.099957358 | 0.920378179 | NA          |
| Klhdc3        | 953.9639955 | 0.212120853 | 0.140561514 | 1.509096249 | 0.131274188 | 0.194530718 |
| Sec11a        | 924.2790231 | 0.2119789   | 0.134963065 | 1.570643795 | 0.116265411 | 0.175717441 |
| Csk           | 1117.693816 | 0.211915759 | 0.176778431 | 1.198764793 | 0.230619416 | 0.313000542 |
| Micu1         | 524.7992925 | 0.211594328 | 0.201320753 | 1.051030881 | 0.293244407 | 0.382438085 |
| Pcbp1         | 3241.001405 | 0.211491888 | 0.130017882 | 1.626636932 | 0.103814231 | 0.159357555 |
| Atp9b         | 723.2781296 | 0.211437208 | 0.165267069 | 1.279366845 | 0.200767904 | 0.278182972 |
| Trnau1ap      | 355.1934705 | 0.211353896 | 0.140093845 | 1.508659397 | 0.131385847 | 0.194669383 |
| Cfap36        | 246.4761307 | 0.211353863 | 0.205412095 | 1.028926084 | 0.30351441  | 0.393633599 |
| Wasl          | 1304.266872 | 0.211063095 | 0.13596835  | 1.552295772 | 0.120591469 | 0.181120205 |
| Ctif          | 340.5276284 | 0.211022036 | 0.194235448 | 1.086423917 | 0.277291485 | 0.364448789 |
| P2rx4         | 1150.671906 | 0.210813711 | 0.245739768 | 0.85787381  | 0.390962147 | 0.483575614 |
| Arpc3         | 1439.342824 | 0.210597284 | 0.140823266 | 1.495472238 | 0.13479124  | 0.198869405 |
| Tsg101        | 851.8275825 | 0.210475711 | 0.161236308 | 1.305386573 | 0.191761248 | 0.267765235 |
| Lage3         | 304.7460518 | 0.209487169 | 0.218487336 | 0.958806913 | 0.337656026 | 0.429867816 |
| Cdk13         | 588.9190141 | 0.209463524 | 0.184830056 | 1.133276307 | 0.257098238 | 0.341995222 |
| Prkag2        | 482.5747705 | 0.209091438 | 0.237681176 | 0.879713916 | 0.379014309 | 0.470950141 |
| Tinf2         | 251.9758005 | 0.20868954  | 0.196569559 | 1.061657467 | 0.288391215 | 0.377176328 |
| Rnf113a1      | 30.18745698 | 0.208677427 | 0.361497157 | 0.577258832 | 0.563764619 | 0.648300791 |
| Olfr323       | 1.665631401 | 0.208650096 | 1.371647627 | 0.152116398 | 0.879095131 | 0.911107897 |
| Tspear        | 1.9823532   | 0.20855197  | 1.519799033 | 0.137223386 | 0.890854226 | 0.919883879 |
| Atp4a         | 23.89041735 | 0.208528416 | 0.620913987 | 0.335841067 | 0.73699072  | 0.798608503 |
| Rnf225        | 7.451217848 | 0.208514086 | 0.623839227 | 0.334243306 | 0.738195967 | 0.799591134 |
| Gm42688       | 94.11393355 | 0.208513693 | 0.232208838 | 0.897957612 | 0.369208148 | 0.461523721 |
| Tbc1d15       | 731.8078069 | 0.208317694 | 0.231123307 | 0.901327071 | 0.367414445 | 0.459787231 |
| Rps18-ps5     | 1.525835146 | 0.208228121 | 2.106959508 | 0.098828725 | 0.921274261 | NA          |
| Ppp2r5d       | 643.7947637 | 0.207406588 | 0.134394531 | 1.543266572 | 0.122766111 | 0.183831063 |
| Gm9964        | 2.856741293 | 0.207190896 | 1.012558697 | 0.204621121 | 0.837868152 | 0.879259537 |
| Twnk          | 416.0473541 | 0.207120824 | 0.188640574 | 1.097965401 | 0.272219598 | 0.358889467 |
| Nsun6         | 82.46927128 | 0.207025883 | 0.327860889 | 0.631444281 | 0.52775007  | 0.615901095 |
| Sarnp         | 561.9903156 | 0.206948131 | 0.165683456 | 1.249057309 | 0.211644114 | 0.290812352 |
| Cep295        | 220.3051815 | 0.206926858 | 0.326405237 | 0.633956919 | 0.526108938 | 0.614280198 |

|           |             |             |             |             |              |             |
|-----------|-------------|-------------|-------------|-------------|--------------|-------------|
| Enox2     | 184.8273534 | 0.206876315 | 0.297520942 | 0.695333625 | 0.486846246  | 0.576799227 |
| Ankhd1    | 410.3277515 | 0.20684029  | 0.220780782 | 0.936858215 | 0.348831495  | 0.441326852 |
| Pias3     | 200.0566871 | 0.206651667 | 0.241566679 | 0.855464291 | 0.392294165  | 0.484834822 |
| Cpne2     | 213.9599189 | 0.206505842 | 0.217978413 | 0.947368316 | 0.34345113   | 0.43586571  |
| Nop9      | 341.1385278 | 0.206243558 | 0.183974969 | 1.121041407 | 0.262270237  | 0.347571334 |
| Lrig2     | 208.1939096 | 0.205909651 | 0.221523327 | 0.929516788 | 0.352621329  | 0.445031716 |
| Rrbp1     | 8690.904146 | 0.205895066 | 0.14881877  | 1.383528884 | 0.166502757  | 0.237614181 |
| Psmc5     | 606.5797288 | 0.205884144 | 0.243102452 | 0.846902786 | 0.397049309  | 0.489860807 |
| Wdr33     | 679.2747998 | 0.205822813 | 0.150754635 | 1.365283487 | 0.172163967  | 0.244526478 |
| Smim15    | 315.3245115 | 0.205637928 | 0.152520996 | 1.3482598   | 0.177574837  | 0.251082012 |
| Mettl18   | 52.92487154 | 0.205545274 | 0.271091625 | 0.758213294 | 0.448323304  | 0.539494296 |
| Polr3gl   | 212.0011682 | 0.205524065 | 0.200069782 | 1.027261905 | 0.304297155  | 0.394438709 |
| Ahctf1    | 1005.663623 | 0.205273327 | 0.143738501 | 1.4281026   | 0.153262329  | 0.221857535 |
| Cct3      | 1837.560867 | 0.205256179 | 0.205485075 | 0.998886071 | 0.317849885  | 0.409329569 |
| Mbd3      | 945.565198  | 0.205216596 | 0.134437769 | 1.526480225 | 0.126890312  | 0.189027091 |
| Mdp1      | 333.9723388 | 0.20512492  | 0.177507158 | 1.155586746 | 0.247850232  | 0.331894647 |
| Stk19     | 342.8144288 | 0.205056088 | 0.237533515 | 0.863272235 | 0.387987806  | 0.480384641 |
| Zfp597    | 130.6736919 | 0.204944876 | 0.301565429 | 0.679603351 | 0.496755647  | 0.586596265 |
| Gmeb1     | 178.2424357 | 0.204873956 | 0.216054126 | 0.948252919 | 0.343000713  | 0.435404032 |
| Znrf2     | 1220.04617  | 0.204705496 | 0.190312585 | 1.07562774  | 0.2802093776 | 0.369904984 |
| Aggf1     | 418.3515427 | 0.204681354 | 0.171340664 | 1.194587142 | 0.232248375  | 0.314810392 |
| Fam199x   | 142.9209295 | 0.204571461 | 0.243038664 | 0.841723935 | 0.399942497  | 0.492895228 |
| Cast      | 1004.702019 | 0.204049631 | 0.169367677 | 1.204773153 | 0.228290887  | 0.310309603 |
| St3gal5   | 1928.211293 | 0.203577532 | 0.36998611  | 0.5502302   | 0.582161492  | 0.665550504 |
| Casp8ap2  | 109.4409645 | 0.20353926  | 0.238822068 | 0.852263201 | 0.394068025  | 0.486693574 |
| Syp       | 16.05150204 | 0.20344565  | 0.508292798 | 0.400252867 | 0.688970279  | 0.758993828 |
| Spns1     | 640.160164  | 0.203382241 | 0.174558773 | 1.165121854 | 0.243969672  | 0.327624652 |
| Hexim2    | 32.46877819 | 0.203308984 | 0.418883723 | 0.485358997 | 0.627421713  | 0.706118653 |
| Akap8     | 1169.576068 | 0.203189454 | 0.19286551  | 1.053529235 | 0.292098503  | 0.381352066 |
| Ati3      | 1831.715982 | 0.203128048 | 0.155025415 | 1.310288692 | 0.190098191  | 0.265813153 |
| Qrich1    | 893.4820911 | 0.203103577 | 0.136358562 | 1.489481662 | 0.136360579  | 0.200775926 |
| Csnk1g2   | 1508.132049 | 0.203026826 | 0.159966426 | 1.269183987 | 0.204375451  | 0.282532654 |
| Cnot11    | 402.5168126 | 0.202996232 | 0.148004296 | 1.371556357 | 0.170201588  | 0.24211856  |
| Xlr       | 8.519834066 | 0.202636885 | 0.646939154 | 0.313224023 | 0.754110468  | 0.812518028 |
| Card6     | 262.9210776 | 0.202563812 | 0.209027036 | 0.969079484 | 0.332505533  | 0.424706251 |
| Zfp433    | 62.9482218  | 0.202481338 | 0.325255367 | 0.622530351 | 0.533593193  | 0.621189344 |
| Tnfrsf13c | 4.258400675 | 0.20244265  | 0.870240454 | 0.232628407 | 0.816049967  | 0.862691348 |
| Mbtps1    | 1250.61513  | 0.202414243 | 0.14145018  | 1.430993185 | 0.152432168  | 0.220824575 |
| Eftud2    | 651.1532462 | 0.202256999 | 0.207738284 | 0.973614468 | 0.330248     | 0.422329    |
| Trpc4ap   | 1795.842346 | 0.202109149 | 0.159890413 | 1.264047955 | 0.206212815  | 0.284749398 |
| Ccdc97    | 484.769351  | 0.20190452  | 0.169500312 | 1.191174922 | 0.233584922  | 0.316370522 |
| Pcnx2     | 3.320634022 | 0.201837485 | 1.132450944 | 0.178230665 | 0.858541828  | 0.89519395  |
| Gm18042   | 2.082931517 | 0.201823547 | 1.451954474 | 0.139001292 | 0.889449128  | 0.918989621 |
| Ttc3ob    | 105.9759354 | 0.201632202 | 0.254974678 | 0.790793043 | 0.42906477   | 0.520878459 |
| Trbv4     | 0.464198016 | 0.201613687 | 3.635112394 | 0.055462848 | 0.955769727  | NA          |
| H13       | 3183.557818 | 0.201612009 | 0.167866118 | 1.201028598 | 0.229740108  | 0.311956142 |
| Cyb561d1  | 132.8780629 | 0.201586826 | 0.248719516 | 0.810498625 | 0.417653655  | 0.509327773 |
| Slain2    | 587.8229015 | 0.201406448 | 0.152854818 | 1.317632317 | 0.187626762  | 0.262939666 |
| Yars      | 526.5937763 | 0.201396549 | 0.249635559 | 0.806762264 | 0.419803464  | 0.511643679 |
| Prdm15    | 228.1551835 | 0.20108954  | 0.310038248 | 0.648595913 | 0.516599598  | 0.605166629 |
| Psg16     | 249.6234675 | 0.200974627 | 0.283830276 | 0.708080298 | 0.478895394  | 0.569170427 |
| Dmrt1     | 0.495992957 | 0.200791976 | 3.066770156 | 0.065473435 | 0.947797057  | NA          |
| Mamdc4    | 42.05958088 | 0.20070161  | 0.397025715 | 0.505512874 | 0.613198659  | 0.693807348 |
| Ap3d1     | 1302.543392 | 0.200700147 | 0.156653223 | 1.281174707 | 0.200132308  | 0.277431744 |
| Zc3h11a   | 2799.308354 | 0.200671127 | 0.150122115 | 1.336719286 | 0.181314284  | 0.255479454 |
| Oser1     | 532.6800918 | 0.200667094 | 0.140640902 | 1.426804657 | 0.153636209  | 0.222342112 |
| Suv39h2   | 14.38051846 | 0.20066391  | 0.515215832 | 0.389475434 | 0.69692448   | 0.765489887 |
| Scpep1    | 773.9929977 | 0.200600816 | 0.182482374 | 1.099288726 | 0.271642148  | 0.358238984 |
| Rffl      | 464.1586696 | 0.200595284 | 0.208573095 | 0.961750524 | 0.336174936  | 0.428270088 |
| Fam219b   | 179.0271475 | 0.200285935 | 0.258128263 | 0.775916332 | 0.437798389  | 0.529182284 |
| Tbk1      | 583.5714821 | 0.200123095 | 0.130311156 | 1.535732631 | 0.124603968  | 0.186239563 |
| Trbj2-3   | 0.365095265 | 0.200076545 | 3.257517611 | 0.061419943 | 0.95102477   | NA          |
| Fam169a   | 5.145958626 | 0.200064831 | 1.18610036  | 0.168674454 | 0.866052713  | 0.901221964 |
| Ehmt1     | 645.8332268 | 0.200058572 | 0.181044572 | 1.105023861 | 0.26914925   | 0.355473847 |
| Tmem35a   | 1.485799767 | 0.199784756 | 1.571664556 | 0.127116665 | 0.898848062  | NA          |
| Anapc1    | 943.4993803 | 0.199754487 | 0.118761697 | 1.681977379 | 0.092573226  | 0.14453598  |

|          |             |             |             |             |             |             |
|----------|-------------|-------------|-------------|-------------|-------------|-------------|
| Heatr3   | 389.2503149 | 0.199624913 | 0.176252843 | 1.13260535  | 0.257380021 | 0.342289929 |
| Rxb      | 647.1394778 | 0.199117336 | 0.160487921 | 1.240699832 | 0.214716656 | 0.294440923 |
| Rxylt1   | 307.3034461 | 0.19905188  | 0.170320137 | 1.168692582 | 0.242527512 | 0.326227633 |
| Sec13    | 1216.844986 | 0.198866381 | 0.124784232 | 1.593681963 | 0.111007286 | 0.168893549 |
| Pcdh15   | 1.647724061 | 0.198857031 | 1.432220708 | 0.138845242 | 0.889572442 | 0.919061329 |
| Alg2     | 319.4749114 | 0.198810989 | 0.211770062 | 0.938805924 | 0.347830397 | 0.44032172  |
| Rpl27    | 302.2399594 | 0.198585858 | 0.183598743 | 1.081629723 | 0.279417092 | 0.366931334 |
| Atad1    | 899.6601838 | 0.198555376 | 0.154686284 | 1.283600402 | 0.199281809 | 0.276387592 |
| Gata3    | 8.859871554 | 0.198469783 | 0.661524884 | 0.30001862  | 0.764162953 | 0.820471723 |
| Nfkbib   | 456.6316411 | 0.198372069 | 0.205624702 | 0.964728782 | 0.334680675 | 0.426781072 |
| Cog7     | 362.223562  | 0.198370104 | 0.192207776 | 1.032060762 | 0.302043654 | 0.391895994 |
| St13     | 2563.534707 | 0.198151475 | 0.212099856 | 0.934236727 | 0.350181795 | 0.442592645 |
| Emg1     | 812.2412392 | 0.198104269 | 0.143738725 | 1.37822476  | 0.168133905 | 0.239580977 |
| Htatsf1  | 520.8278243 | 0.198078427 | 0.183407677 | 1.079989838 | 0.280146706 | 0.367693015 |
| Cggbp1   | 740.8304593 | 0.198044195 | 0.153076937 | 1.293755931 | 0.195749739 | 0.272319274 |
| Glrx     | 869.4539961 | 0.19796579  | 0.151818715 | 1.303961702 | 0.192246641 | 0.268311153 |
| Ctnnbip1 | 191.0605378 | 0.197530979 | 0.20949626  | 0.942885468 | 0.345739489 | 0.438032611 |
| Psme3    | 1073.421322 | 0.197317298 | 0.165673174 | 1.191003304 | 0.233652288 | 0.316436622 |
| Cdk11b   | 918.6361259 | 0.197207162 | 0.20698087  | 0.952779657 | 0.340701724 | 0.433033847 |
| Ube2j1   | 742.9951428 | 0.197139047 | 0.180710867 | 1.090908642 | 0.275313084 | 0.362211565 |
| Mlf2     | 2241.270094 | 0.19708467  | 0.115498991 | 1.706375679 | 0.087938156 | 0.138414706 |
| Ffar1    | 6.5982956   | 0.196929492 | 0.701109318 | 0.28088272  | 0.778800355 | 0.83272632  |
| Zfp712   | 18.6913668  | 0.196789363 | 0.4820236   | 0.408256698 | 0.683085227 | 0.753834603 |
| Anxa7    | 2275.399928 | 0.196783403 | 0.128191659 | 1.535071822 | 0.124766187 | 0.186416648 |
| Eif2s2   | 1765.48491  | 0.196778836 | 0.185820433 | 1.058973075 | 0.289612042 | 0.378488478 |
| Chmp1b   | 585.0583941 | 0.196654475 | 0.175428189 | 1.120997006 | 0.262289137 | 0.347571334 |
| Cspp1    | 519.4656276 | 0.196377457 | 0.168772505 | 1.163563087 | 0.244601118 | 0.328291596 |
| Polr2f   | 540.7314349 | 0.196207327 | 0.136649666 | 1.435841983 | 0.15104731  | 0.219193706 |
| Tcf7     | 55.97024637 | 0.196182967 | 0.339082382 | 0.578570216 | 0.562879207 | 0.647419837 |
| Ube2o    | 253.6339837 | 0.195960471 | 0.1595135   | 1.228488319 | 0.219263712 | 0.299904345 |
| Med13    | 790.6528003 | 0.195947457 | 0.147235802 | 1.330841105 | 0.183241299 | 0.257789274 |
| Nmral1   | 178.0185638 | 0.195879527 | 0.338562602 | 0.57856221  | 0.56288461  | 0.647419837 |
| Rsbnl1   | 279.2157857 | 0.195859864 | 0.224256029 | 0.873376136 | 0.382458094 | 0.474572064 |
| Snx11    | 186.2736626 | 0.195838947 | 0.215883174 | 0.907152436 | 0.364326193 | 0.456626447 |
| Gucy1a2  | 3.371975477 | 0.195643648 | 1.128704474 | 0.173334697 | 0.862388352 | 0.898325591 |
| Yipf4    | 563.9896949 | 0.195630225 | 0.148719361 | 1.315432118 | 0.188364717 | 0.263908753 |
| Tmx2     | 927.4852186 | 0.195533528 | 0.191454801 | 1.021303862 | 0.307110497 | 0.397541364 |
| Gfod2    | 153.9272257 | 0.195488731 | 0.323597492 | 0.604110774 | 0.545769997 | 0.632084709 |
| H3c1     | 2.236586306 | 0.195228169 | 1.727533408 | 0.113009779 | 0.910022802 | 0.933851125 |
| Nutf2    | 274.6682084 | 0.195207341 | 0.178969346 | 1.090730594 | 0.275391445 | 0.3622867   |
| Eri3     | 468.7401036 | 0.195034474 | 0.140060225 | 1.392504358 | 0.163769723 | 0.234321967 |
| Map3k2   | 421.2729807 | 0.195031241 | 0.16673029  | 1.169740906 | 0.242105251 | 0.325762456 |
| Drg1     | 901.577315  | 0.195004388 | 0.138914343 | 1.403774321 | 0.160386063 | 0.230273    |
| Dicer1   | 960.5911307 | 0.194995259 | 0.202945196 | 0.960827175 | 0.336639072 | 0.428797288 |
| Zfp329   | 155.8401098 | 0.194846281 | 0.275814761 | 0.706438917 | 0.479915226 | 0.570145977 |
| Pik3ca   | 571.2006224 | 0.194819106 | 0.19985144  | 0.974819628 | 0.329649739 | 0.421627185 |
| Ctla     | 1383.856491 | 0.194746665 | 0.15930746  | 1.222457917 | 0.221534509 | 0.30239778  |
| Timd2    | 1475.418999 | 0.194722459 | 0.172906727 | 1.126170526 | 0.260093347 | 0.345251995 |
| Zfp180   | 263.8764671 | 0.19424854  | 0.16485515  | 1.178298279 | 0.238677714 | 0.322040179 |
| Gm3488   | 0.055443699 | 0.194219885 | 3.649449705 | 0.053218951 | 0.957557456 | NA          |
| Gm12097  | 0.777832317 | 0.193732894 | 2.069691683 | 0.093604712 | 0.925423166 | NA          |
| Gm5697   | 5.451871778 | 0.193706357 | 0.830036413 | 0.233370915 | 0.815473396 | 0.862151346 |
| Gm9780   | 32.46352288 | 0.193606442 | 0.413543439 | 0.468164706 | 0.63966681  | 0.716870876 |
| Xpo7     | 862.4483018 | 0.19359046  | 0.14196283  | 1.363670052 | 0.172671434 | 0.24514512  |
| Aff1     | 533.3997001 | 0.193502691 | 0.135315279 | 1.430013614 | 0.152713112 | 0.221143001 |
| Rbfox3   | 9.764436096 | 0.193477277 | 0.586619923 | 0.329817092 | 0.741538172 | 0.802242845 |
| Tuba1    | 35.82065939 | 0.193337128 | 0.43050253  | 0.44909638  | 0.653362132 | 0.728417801 |
| Tuba1c   | 2377.221513 | 0.193069794 | 0.179791882 | 1.073851565 | 0.282889215 | 0.370833935 |
| Gpx4     | 6610.447711 | 0.192545073 | 0.181488083 | 1.060924057 | 0.288724416 | 0.377583142 |
| Dntt     | 8.149608404 | 0.192144656 | 0.683607375 | 0.28107458  | 0.778653198 | 0.832621195 |
| Mbnl1    | 1480.495307 | 0.192035989 | 0.197539791 | 0.97213826  | 0.330981771 | 0.423140399 |
| Mogs     | 765.1073538 | 0.191793611 | 0.170733606 | 1.123350081 | 0.261288842 | 0.346569064 |
| Trmt12   | 79.20308597 | 0.191545932 | 0.257604198 | 0.743566813 | 0.457138587 | 0.547782289 |
| Stub1    | 1132.418237 | 0.191331904 | 0.1266332   | 1.510914231 | 0.130810305 | 0.193968346 |
| Rps6-ps4 | 2638.231295 | 0.190893686 | 0.201875143 | 0.945602724 | 0.344351254 | 0.43661557  |
| B3gnt5   | 3.676182382 | 0.190881517 | 0.977004887 | 0.195374168 | 0.845100038 | 0.884804117 |

|               |             |             |             |             |             |    |             |
|---------------|-------------|-------------|-------------|-------------|-------------|----|-------------|
| Gm5210        | 0.463268021 | 0.190794853 | 3.635162625 | 0.052485919 | 0.958141515 | NA |             |
| Pla2g6        | 982.737524  | 0.19072682  | 0.204385617 | 0.933171438 | 0.350731459 |    | 0.443081921 |
| Atp11b        | 958.7706904 | 0.190698807 | 0.191056569 | 0.998127455 | 0.318217559 |    | 0.409617407 |
| Gm4940        | 0.46408454  | 0.190389545 | 3.635161287 | 0.052374442 | 0.958230338 | NA |             |
| Stip1         | 1344.476201 | 0.190316156 | 0.179719316 | 1.058963273 | 0.289616506 |    | 0.378488478 |
| Xab2          | 435.6801966 | 0.190119732 | 0.15531579  | 1.224085014 | 0.220920159 |    | 0.301685907 |
| Calcoco1      | 1206.177912 | 0.189970899 | 0.141866918 | 1.339078213 | 0.180545212 |    | 0.25456412  |
| Shprh         | 364.1330399 | 0.18990012  | 0.158335667 | 1.199351502 | 0.230391297 |    | 0.31271583  |
| Tpgs1         | 383.7781132 | 0.189504139 | 0.135929298 | 1.394137547 | 0.163276073 |    | 0.233725585 |
| Tmem245       | 723.4185413 | 0.189478183 | 0.200038303 | 0.947209509 | 0.343532031 |    | 0.435916194 |
| Adamts3       | 1.897352676 | 0.189396087 | 1.777448313 | 0.106555046 | 0.915141984 |    | 0.937290001 |
| Tmem258       | 756.705785  | 0.189017508 | 0.200424951 | 0.943083722 | 0.345638081 |    | 0.437936678 |
| Aff3          | 10.36915881 | 0.188845551 | 0.623399877 | 0.302928437 | 0.761944399 |    | 0.818851209 |
| Nfib          | 1578.987262 | 0.188785165 | 0.122382003 | 1.542589281 | 0.12293046  |    | 0.184060995 |
| Exosc4        | 421.7873168 | 0.188735141 | 0.156203691 | 1.208263006 | 0.226946113 |    | 0.308678581 |
| Stag2         | 840.1843595 | 0.188725895 | 0.179054352 | 1.054014569 | 0.291876247 |    | 0.381120271 |
| Ranbp3        | 756.3296806 | 0.188263137 | 0.155490877 | 1.210766446 | 0.225984928 |    | 0.307542992 |
| Med20         | 469.5493882 | 0.188120747 | 0.138878539 | 1.354570322 | 0.175554494 |    | 0.248658443 |
| Mettl1        | 201.1949428 | 0.187869843 | 0.221644742 | 0.847616961 | 0.396651325 |    | 0.48945941  |
| Fgfr1op       | 342.4755563 | 0.187779492 | 0.218884347 | 0.857893652 | 0.39095119  |    | 0.483575614 |
| Slc6a18       | 0.93172368  | 0.187740724 | 2.277915684 | 0.082417767 | 0.934314508 | NA |             |
| Zfp92         | 5.97516492  | 0.187708819 | 0.9251717   | 0.202890792 | 0.839220391 |    | 0.880270057 |
| Olfr1204      | 0.925564872 | 0.187433276 | 2.000888047 | 0.093675044 | 0.925367295 | NA |             |
| Rsl24d1       | 415.8186552 | 0.187430731 | 0.142874634 | 1.311854497 | 0.189569233 |    | 0.265225793 |
| Cox10         | 193.5888725 | 0.186785602 | 0.242276305 | 0.770961083 | 0.440729999 |    | 0.531933807 |
| Wdr46         | 471.965427  | 0.186773793 | 0.239463849 | 0.779966555 | 0.435410562 |    | 0.526887551 |
| Man2a2        | 736.1814951 | 0.186767292 | 0.149264286 | 1.251252368 | 0.210842418 |    | 0.289967855 |
| Masp1         | 2914.406594 | 0.18660428  | 0.212846157 | 0.876709649 | 0.380644364 |    | 0.472596688 |
| Lmbrd2        | 1120.931394 | 0.186304213 | 0.162755087 | 1.144690567 | 0.25233736  |    | 0.337056125 |
| Usp17lb       | 0.464050948 | 0.186033232 | 3.635180274 | 0.051175793 | 0.959185441 | NA |             |
| Tmed10        | 2839.545593 | 0.185989585 | 0.137137027 | 1.356231707 | 0.175025457 |    | 0.247991521 |
| Tmed9         | 1451.904554 | 0.185762839 | 0.182536299 | 1.017676153 | 0.308831884 |    | 0.399466309 |
| Nvl           | 562.9611557 | 0.185724087 | 0.161353016 | 1.151041929 | 0.249714986 |    | 0.333998202 |
| Rps23         | 2006.662201 | 0.185486121 | 0.148320786 | 1.250574016 | 0.211089936 |    | 0.290191212 |
| Nhej1         | 63.36816265 | 0.185096956 | 0.429428821 | 0.431030586 | 0.666446131 |    | 0.739493208 |
| Carns1        | 39.06170256 | 0.185045442 | 0.366373589 | 0.505073094 | 0.613507498 |    | 0.694032902 |
| Tsr2          | 211.7080883 | 0.184997349 | 0.22220102  | 0.832567507 | 0.405088691 |    | 0.497844927 |
| Gm13083       | 1.905403852 | 0.184543433 | 1.413142669 | 0.130590801 | 0.89609902  |    | 0.923788843 |
| Glb112        | 6.878055174 | 0.184263295 | 0.799351326 | 0.230516032 | 0.817690807 |    | 0.863895571 |
| Papog         | 125.6610577 | 0.184234445 | 0.204679838 | 0.900110371 | 0.368061518 |    | 0.460427998 |
| 4931429L15Rik | 0.378957827 | 0.184216044 | 3.635188193 | 0.050675793 | 0.959583866 | NA |             |
| Ndufaf5       | 85.14975132 | 0.184113786 | 0.250549068 | 0.734841231 | 0.462436193 |    | 0.55293551  |
| Fam149a       | 514.4135495 | 0.183263415 | 0.239448116 | 0.765357514 | 0.444058685 |    | 0.535231367 |
| Dguok         | 306.7620571 | 0.183063975 | 0.196974996 | 0.929376717 | 0.35269389  |    | 0.445072368 |
| Atp6v1f       | 999.0342982 | 0.182908158 | 0.172839117 | 1.058256724 | 0.289938417 |    | 0.378874522 |
| Fam124a       | 130.7783103 | 0.18275582  | 0.30308086  | 0.602993603 | 0.546512945 |    | 0.632902159 |
| Zfp605        | 42.45166151 | 0.182680994 | 0.35478995  | 0.51489901  | 0.606623593 |    | 0.687888719 |
| Fxr2          | 924.767658  | 0.18261813  | 0.174157421 | 1.048580814 | 0.29437109  |    | 0.383614    |
| Sqor          | 2510.784108 | 0.182535359 | 0.27283286  | 0.669037296 | 0.503471687 |    | 0.592761417 |
| Cobl1         | 883.8500414 | 0.182439928 | 0.191180982 | 0.954278643 | 0.339942616 |    | 0.432326871 |
| Tmem218       | 70.06267288 | 0.182238053 | 0.31335     | 0.581579874 | 0.560849703 |    | 0.645925005 |
| Wfs1          | 195.5904319 | 0.182139544 | 0.240105406 | 0.758581602 | 0.448102882 |    | 0.539343259 |
| Gm20390       | 1235.966961 | 0.182005061 | 0.232385208 | 0.783204157 | 0.433507234 |    | 0.524814041 |
| Myrip         | 1.571947661 | 0.181829787 | 1.619981423 | 0.112241896 | 0.910631611 | NA |             |
| Rcor1         | 378.6294331 | 0.181215791 | 0.136877299 | 1.323928745 | 0.18552671  |    | 0.260575001 |
| Cdk2ap2       | 1001.417842 | 0.181162513 | 0.147775971 | 1.225926726 | 0.22022625  |    | 0.300931157 |
| Slc25a37      | 1091.805058 | 0.181044894 | 0.241026672 | 0.751140496 | 0.452568107 |    | 0.543413572 |
| E330034G19Rik | 1.328186105 | 0.18086785  | 1.851481315 | 0.097688185 | 0.922179897 | NA |             |
| Cfap65        | 0.77895403  | 0.18059534  | 2.321810546 | 0.077782117 | 0.938001372 | NA |             |
| Brd3          | 943.0046418 | 0.180399165 | 0.207856821 | 0.867901105 | 0.385448474 |    | 0.477622153 |
| Cpt1b         | 128.9205343 | 0.18011673  | 0.370809691 | 0.485739004 | 0.627152226 |    | 0.705955177 |
| Olfr173       | 5.57065555  | 0.18006928  | 0.888572823 | 0.202649997 | 0.839408609 |    | 0.880359149 |
| Al597479      | 225.744853  | 0.180017023 | 0.171782006 | 1.047938767 | 0.29466682  |    | 0.383940687 |
| Ifitm2        | 2808.414891 | 0.180013262 | 0.155299925 | 1.159132959 | 0.246401993 |    | 0.330318564 |
| Trim11        | 3.328224498 | 0.179862813 | 1.174527723 | 0.153136286 | 0.878290801 |    | 0.910495687 |
| lgsf5         | 455.4242406 | 0.179682779 | 0.143707097 | 1.250340331 | 0.211175252 |    | 0.290261686 |

|               |             |             |             |             |             |             |
|---------------|-------------|-------------|-------------|-------------|-------------|-------------|
| Htati2        | 650.6662022 | 0.179624773 | 0.354182727 | 0.507152832 | 0.612047588 | 0.692749122 |
| Psg23         | 84.18145972 | 0.179454217 | 0.251704114 | 0.712957029 | 0.475872348 | 0.566690853 |
| Scarb1        | 2800.285113 | 0.17935344  | 0.13642486  | 1.314668307 | 0.188621403 | 0.264203243 |
| Oasl1         | 201.072218  | 0.179024251 | 0.304335562 | 0.588246243 | 0.556367023 | 0.641438088 |
| Usb1          | 218.1777541 | 0.179017953 | 0.188402375 | 0.950189472 | 0.342015987 | 0.434412796 |
| Spata17       | 4.335136917 | 0.178973386 | 1.037253796 | 0.172545414 | 0.863008761 | 0.898532635 |
| Ache          | 4.898640157 | 0.178791121 | 1.009830482 | 0.177050628 | 0.859468623 | 0.895722037 |
| Mob1b         | 741.5948609 | 0.178774439 | 0.255531631 | 0.699617649 | 0.484166118 | 0.574515485 |
| Zcchc14       | 691.844903  | 0.178578485 | 0.184767604 | 0.966503223 | 0.333792435 | 0.425871384 |
| Vps35         | 1230.145342 | 0.178468106 | 0.149095901 | 1.197002097 | 0.231305737 | 0.313732215 |
| Ak6           | 665.099623  | 0.178343156 | 0.180572159 | 0.987655886 | 0.323321206 | 0.414621628 |
| Hyal2         | 794.0600968 | 0.178163094 | 0.144461643 | 1.233289959 | 0.217467603 | 0.297782144 |
| Klf12         | 279.04615   | 0.177869857 | 0.249796852 | 0.712058042 | 0.476428835 | 0.567020152 |
| Ubb           | 13084.42891 | 0.177689033 | 0.111813482 | 1.589155702 | 0.112025245 | 0.170214472 |
| Rpl37rt       | 630.4244663 | 0.177623398 | 0.228529647 | 0.777244442 | 0.437014566 | 0.528347233 |
| Kremen1       | 242.5323867 | 0.177425277 | 0.20620352  | 0.860437673 | 0.389547827 | 0.48195214  |
| Usp3          | 640.501396  | 0.177344246 | 0.144627106 | 1.226217206 | 0.220116948 | 0.300840866 |
| Rrp36         | 273.1610736 | 0.177083548 | 0.188216428 | 0.940850648 | 0.346781402 | 0.439156837 |
| Npm3          | 292.7305065 | 0.177021314 | 0.184545889 | 0.95922654  | 0.337444633 | 0.429694958 |
| Vps72         | 485.0902495 | 0.176983019 | 0.135669181 | 1.304518967 | 0.192056697 | 0.268071207 |
| Gm49384       | 19.22732014 | 0.176976491 | 0.577143143 | 0.306642282 | 0.759115666 | 0.816693307 |
| Endov         | 275.5545115 | 0.176926331 | 0.25299424  | 0.699329482 | 0.484346146 | 0.574689108 |
| Isg20l2       | 355.4479723 | 0.176645998 | 0.171701267 | 1.028798456 | 0.303574392 | 0.393681442 |
| Srfbp1        | 133.0111492 | 0.176336624 | 0.223456832 | 0.789130598 | 0.43003568  | 0.521685638 |
| Daam1         | 892.1731462 | 0.1762947   | 0.131014184 | 1.345615367 | 0.178426593 | 0.252181774 |
| Dnajc8        | 526.5618112 | 0.176218747 | 0.176473202 | 0.998558108 | 0.318008802 | 0.409502321 |
| Gm6472        | 2027.350428 | 0.176036938 | 0.204211152 | 0.86203391  | 0.388668858 | 0.481050107 |
| Vwce          | 727.2911911 | 0.175901931 | 0.341527456 | 0.515044772 | 0.606521734 | 0.687818966 |
| Cpq           | 1290.341364 | 0.175517372 | 0.134934034 | 1.300764282 | 0.193339151 | 0.269504976 |
| Wdr82         | 693.2679038 | 0.175426263 | 0.14250426  | 1.231024695 | 0.218313628 | 0.298748654 |
| Gria2         | 5.54918575  | 0.175390752 | 1.01318139  | 0.173108936 | 0.862565801 | 0.898336278 |
| Spag1         | 60.34234578 | 0.175252103 | 0.275194551 | 0.636829842 | 0.524235685 | 0.612470529 |
| 4933411K16Rik | 58.56114204 | 0.175121972 | 0.328124743 | 0.533705476 | 0.59354532  | 0.676206938 |
| Btf3          | 2604.595341 | 0.174997856 | 0.153131402 | 1.142795365 | 0.253123564 | 0.337947413 |
| Agt           | 11806.48139 | 0.174952218 | 0.219424099 | 0.797324536 | 0.425262574 | 0.51714647  |
| Mrpl33        | 570.6354847 | 0.174914454 | 0.18416223  | 0.949784623 | 0.342221701 | 0.434609323 |
| Pramef8       | 124.8678818 | 0.17465604  | 0.237120773 | 0.736569968 | 0.461383903 | 0.55182214  |
| Vps50         | 284.8813442 | 0.174588874 | 0.205104242 | 0.851220202 | 0.394647043 | 0.487320207 |
| Nxf1          | 1842.879954 | 0.174316796 | 0.241887714 | 0.720651717 | 0.471123826 | 0.561815822 |
| Rexo1         | 876.6113157 | 0.173664913 | 0.185819979 | 0.934586869 | 0.350001249 | 0.442479082 |
| Zgpat         | 591.1570939 | 0.173618247 | 0.207190386 | 0.837964783 | 0.402050483 | 0.495146473 |
| Eif2b2        | 392.6903799 | 0.173536304 | 0.197707387 | 0.877743146 | 0.380083124 | 0.472002994 |
| Rcbtb2        | 684.3852555 | 0.173258186 | 0.135037853 | 1.283034222 | 0.199480087 | 0.27661758  |
| Nmt1          | 1315.081391 | 0.173217294 | 0.206871747 | 0.837317304 | 0.402414235 | 0.495404237 |
| Nudt14        | 243.8078465 | 0.173130395 | 0.198686288 | 0.871375659 | 0.383549072 | 0.475648838 |
| Chchd5        | 233.0123855 | 0.173038655 | 0.237330968 | 0.729102725 | 0.465938828 | 0.556372147 |
| Fastkd2       | 281.1308409 | 0.172809337 | 0.203103522 | 0.850843626 | 0.394856224 | 0.487507887 |
| Rnf185        | 543.3578691 | 0.172798755 | 0.189633869 | 0.911223062 | 0.362177855 | 0.454635746 |
| Tll1          | 6.40020095  | 0.172581397 | 0.69087906  | 0.249799721 | 0.802742235 | 0.852497952 |
| Serpina3m     | 2254.829173 | 0.172525107 | 0.666284456 | 0.258936114 | 0.795684534 | 0.846056878 |
| ltp2          | 545.7741078 | 0.172460158 | 0.229208776 | 0.752415162 | 0.451801431 | 0.542683774 |
| Gba           | 429.4262816 | 0.17242296  | 0.201423097 | 0.856023777 | 0.391984628 | 0.484558764 |
| Pdia3         | 11050.31059 | 0.172175551 | 0.208911621 | 0.824154973 | 0.409851508 | 0.502130687 |
| Mboat4        | 3.028593328 | 0.1721572   | 1.137194406 | 0.15138766  | 0.879669923 | 0.911592781 |
| Smg6          | 700.3523241 | 0.171895528 | 0.206485388 | 0.832482769 | 0.4051365   | 0.497844927 |
| Triap1        | 192.8621965 | 0.171719966 | 0.202794866 | 0.84676683  | 0.3971251   | 0.489883409 |
| Ppp6c         | 741.6479262 | 0.171555385 | 0.21153622  | 0.810997686 | 0.417367    | 0.509070087 |
| Tmx1          | 552.3685696 | 0.171526544 | 0.172206424 | 0.996051948 | 0.319224906 | 0.410666027 |
| Zfp980        | 1.680028092 | 0.171357636 | 2.457661435 | 0.069723858 | 0.944413452 | 0.959533042 |
| H2ac6         | 6.559281432 | 0.171356979 | 0.747690876 | 0.229181584 | 0.818727786 | 0.864626853 |
| Gpr174        | 6.154225198 | 0.17126838  | 0.791288442 | 0.216442413 | 0.828642909 | 0.872773033 |
| Clptm1        | 1802.762152 | 0.171200003 | 0.209513953 | 0.817129362 | 0.413854505 | 0.506125653 |
| Pgm3          | 337.0116529 | 0.170934399 | 0.275014959 | 0.621545822 | 0.534240555 | 0.621560976 |
| Gm5124        | 0.417946162 | 0.170905143 | 3.151267473 | 0.054233779 | 0.956748909 | NA          |
| Nck1          | 293.6163249 | 0.170646661 | 0.211260754 | 0.807753728 | 0.419232367 | 0.511125895 |
| lcmt          | 511.667642  | 0.170477662 | 0.214757091 | 0.793816219 | 0.427302429 | 0.519330706 |



|               |             |             |             |             |             |             |
|---------------|-------------|-------------|-------------|-------------|-------------|-------------|
| Ppp4r1l-ps    | 492.7209549 | 0.170428194 | 0.217965478 | 0.781904528 | 0.434270684 | 0.525626313 |
| Cant1         | 618.9743634 | 0.17018648  | 0.130458538 | 1.304525432 | 0.192054494 | 0.268071207 |
| Paqr5         | 9.783230109 | 0.169488244 | 0.579242452 | 0.292603284 | 0.769825403 | 0.82549864  |
| Vps16         | 713.7177106 | 0.169340204 | 0.172172837 | 0.983547737 | 0.325337933 | 0.416768942 |
| Napg          | 458.4067012 | 0.169211465 | 0.160935488 | 1.051424192 | 0.29306381  | 0.382290292 |
| Pten          | 2364.990007 | 0.169050174 | 0.123257555 | 1.371519775 | 0.170212983 | 0.24211856  |
| Hhipl1        | 18.75654795 | 0.168810584 | 0.514635016 | 0.328020012 | 0.742896532 | 0.803151758 |
| Dclre1b       | 116.266697  | 0.168486089 | 0.339221914 | 0.496683975 | 0.619411925 | 0.699134964 |
| Mlh3          | 204.7707678 | 0.16820295  | 0.169068134 | 0.994882632 | 0.319793351 | 0.41124214  |
| Wdr81         | 954.2075761 | 0.16797913  | 0.189116141 | 0.888232644 | 0.374415623 | 0.466596311 |
| 4930522L14Rik | 46.68918137 | 0.167887643 | 0.349447667 | 0.480437154 | 0.63091658  | 0.709304535 |
| Phax          | 437.0204882 | 0.167872009 | 0.147265237 | 1.139929646 | 0.254315613 | 0.339193598 |
| Arl5a         | 2127.856411 | 0.167610027 | 0.159626211 | 1.050015701 | 0.293710894 | 0.38295717  |
| Eif3k         | 1110.376124 | 0.167438912 | 0.121225692 | 1.381216378 | 0.16721244  | 0.238427374 |
| Fgf17         | 0.515619761 | 0.167122062 | 3.000840424 | 0.055691753 | 0.95558737  | NA          |
| Gigyf2        | 850.1012949 | 0.167100674 | 0.171117382 | 0.97652659  | 0.328803578 | 0.420671174 |
| Zfand3        | 1485.432254 | 0.166971539 | 0.1355662   | 1.231660536 | 0.218075917 | 0.298495242 |
| Unc45b        | 30.47116855 | 0.166897478 | 0.418129702 | 0.39915241  | 0.689780906 | 0.759552054 |
| Rab8a         | 1185.551474 | 0.166881081 | 0.166087084 | 1.004780606 | 0.315002504 | 0.406276494 |
| Xrcc5         | 490.6706947 | 0.166833022 | 0.141087588 | 1.182478379 | 0.237101594 | 0.320178109 |
| Vps26b        | 440.1172105 | 0.166682475 | 0.148533359 | 1.122188819 | 0.261782166 | 0.347115374 |
| Olfr354       | 3.634613105 | 0.166602501 | 1.169200974 | 0.142492613 | 0.886690914 | 0.916862176 |
| Usp34         | 991.9751169 | 0.16658444  | 0.187446452 | 0.888704156 | 0.374162097 | 0.466348547 |
| Gm5460        | 4.73917214  | 0.166515747 | 1.081357843 | 0.153987645 | 0.877619477 | 0.910007522 |
| Ik            | 1506.487214 | 0.166363004 | 0.110595783 | 1.504243641 | 0.132518645 | 0.196109189 |
| Rwdd4a        | 359.0804909 | 0.166216327 | 0.267538302 | 0.621280487 | 0.53441509  | 0.621636767 |
| Adam9         | 1062.054295 | 0.166186016 | 0.188037406 | 0.883792323 | 0.376808331 | 0.46872152  |
| Yipf3         | 1036.353173 | 0.166177155 | 0.108351459 | 1.53368637  | 0.125106829 | 0.186843733 |
| Gnrh1         | 12.06875739 | 0.166111015 | 0.673785403 | 0.246534006 | 0.805268883 | 0.854170229 |
| Zc3h10        | 183.5033242 | 0.166051622 | 0.230473168 | 0.720481359 | 0.471228673 | 0.561862247 |
| Usp28         | 189.9087024 | 0.166005069 | 0.33587261  | 0.494250094 | 0.621129566 | 0.700483963 |
| Slc12a3       | 12.83219905 | 0.16591369  | 0.533181694 | 0.311176644 | 0.755666338 | 0.814014895 |
| Fam92a        | 326.7183844 | 0.165862694 | 0.16452644  | 1.008121821 | 0.313395983 | 0.40444926  |
| Ube2q1        | 846.0753492 | 0.165599056 | 0.159932396 | 1.035431595 | 0.300467397 | 0.390127051 |
| Fam120c       | 57.54375009 | 0.165443827 | 0.304366183 | 0.543568359 | 0.586738538 | 0.669795005 |
| Myocd         | 0.993598122 | 0.165335219 | 2.07205532  | 0.079792859 | 0.936402004 | NA          |
| Gal3st2c      | 16.69761541 | 0.165204063 | 0.491573272 | 0.336072102 | 0.736816496 | 0.798502804 |
| Zfp317        | 270.815101  | 0.165163644 | 0.18194634  | 0.907760191 | 0.364004935 | 0.456257344 |
| Srcap         | 977.0889128 | 0.164962463 | 0.185634015 | 0.888643512 | 0.374194698 | 0.466355086 |
| Adss          | 991.2991969 | 0.164638001 | 0.176862333 | 0.930882219 | 0.351914493 | 0.444287545 |
| Slc35e1       | 576.8151135 | 0.164599745 | 0.243189867 | 0.676836363 | 0.498509784 | 0.588015969 |
| Mospd1        | 232.0392195 | 0.164464567 | 0.284197865 | 0.578697406 | 0.562793367 | 0.647402248 |
| Gpt2          | 8212.988271 | 0.164266995 | 0.174569852 | 0.940981468 | 0.346714356 | 0.43910455  |
| Pogz          | 455.0825916 | 0.164233788 | 0.179005017 | 0.917481481 | 0.358890393 | 0.451240019 |
| Smim14        | 1378.366475 | 0.164082907 | 0.113357322 | 1.447483971 | 0.147761423 | 0.215136795 |
| Arap1         | 1434.72458  | 0.164005916 | 0.136884409 | 1.198134378 | 0.230864707 | 0.313257234 |
| Tmed4         | 1154.972781 | 0.163908563 | 0.144130155 | 1.137226019 | 0.255443813 | 0.340405387 |
| Edem2         | 1275.861221 | 0.163670324 | 0.147677975 | 1.108292039 | 0.267735712 | 0.353905698 |
| Fam133b       | 180.6117225 | 0.16351953  | 0.21679674  | 0.754252716 | 0.450697489 | 0.541743943 |
| Rorc          | 684.8947958 | 0.163515437 | 0.212775403 | 0.768488439 | 0.442197056 | 0.533326878 |
| Paip2         | 1289.440253 | 0.163469423 | 0.166168731 | 0.98375562  | 0.325235685 | 0.416700583 |
| Egln2         | 999.9658054 | 0.163313006 | 0.218664811 | 0.746864596 | 0.455145299 | 0.545930982 |
| Fam217a       | 3.622585607 | 0.163237688 | 1.033797722 | 0.157900994 | 0.874534815 | 0.907374446 |
| Snap91        | 3.207546677 | 0.163179994 | 1.302284815 | 0.125302846 | 0.900283799 | 0.926701981 |
| Rps6-ps1      | 2.303495418 | 0.162877188 | 1.184968356 | 0.137452774 | 0.890672919 | 0.919769291 |
| Bcat2         | 498.8429671 | 0.162813113 | 0.174334536 | 0.933911984 | 0.350349297 | 0.44272143  |
| Gatad2b       | 578.1033215 | 0.16280669  | 0.128271881 | 1.269231327 | 0.204358571 | 0.282532229 |
| Cyp4x1        | 3.031387826 | 0.16275437  | 1.098608417 | 0.148145934 | 0.882227599 | 0.913354959 |
| Kpna4         | 778.6917127 | 0.162650899 | 0.207321996 | 0.784532766 | 0.432727563 | 0.524167934 |
| Zfp26         | 265.5157277 | 0.162424735 | 0.201874614 | 0.80458227  | 0.421060777 | 0.51287826  |
| Zfp54         | 76.18238586 | 0.162121107 | 0.319417748 | 0.507551969 | 0.611767582 | 0.692558089 |
| Gm16044       | 2.327917242 | 0.162055427 | 1.238365139 | 0.130862394 | 0.895884164 | 0.923710652 |
| Dnhd1         | 80.92742882 | 0.162048129 | 0.341209586 | 0.474922556 | 0.634842174 | 0.712728968 |
| Tmem167       | 781.7549269 | 0.162036934 | 0.230564332 | 0.702784046 | 0.482190341 | 0.572489793 |
| Adig          | 0.851190224 | 0.16177928  | 2.661814032 | 0.06077783  | 0.951536147 | NA          |
| Avl9          | 379.7031627 | 0.161718356 | 0.170878088 | 0.946396099 | 0.343946595 | 0.436247418 |

|         |             |             |             |             |             |             |
|---------|-------------|-------------|-------------|-------------|-------------|-------------|
| Golgb1  | 1858.622138 | 0.16147068  | 0.188423417 | 0.85695654  | 0.391468903 | 0.484097045 |
| Entr1   | 872.6151954 | 0.161002619 | 0.179889787 | 0.895006999 | 0.370783347 | 0.462949648 |
| Arfp2   | 473.8584314 | 0.160737996 | 0.15228918  | 1.055478771 | 0.291206414 | 0.380333022 |
| Fbxw8   | 916.0902986 | 0.160349887 | 0.172908339 | 0.927369308 | 0.353734821 | 0.446172775 |
| Dip2c   | 324.2287038 | 0.160037415 | 0.212440283 | 0.753328946 | 0.451252269 | 0.542286399 |
| Ms4a3   | 1.772687959 | 0.15993779  | 1.641261514 | 0.097448084 | 0.922370561 | 0.942607201 |
| Nol12   | 275.1779942 | 0.159922157 | 0.150879555 | 1.059932589 | 0.289175268 | 0.378085741 |
| Gm4609  | 0.756258622 | 0.159517496 | 2.69319594  | 0.059229815 | 0.952769063 | NA          |
| Rps25   | 5040.368544 | 0.159430839 | 0.126015877 | 1.265164697 | 0.205812295 | 0.284265414 |
| Dcun1d5 | 484.1567055 | 0.159387279 | 0.169625035 | 0.939644782 | 0.347399798 | 0.439907283 |
| Fam174a | 211.4066462 | 0.159113869 | 0.209712073 | 0.758725364 | 0.448016861 | 0.539277797 |
| Tmco6   | 192.6643158 | 0.159099518 | 0.173283753 | 0.918144461 | 0.358543241 | 0.450969837 |
| Osbp12  | 423.5703142 | 0.158971814 | 0.159441266 | 0.997055642 | 0.318737502 | 0.410131855 |
| Olfr373 | 2.280262047 | 0.158884442 | 1.900133078 | 0.083617534 | 0.933360526 | 0.950590253 |
| Dyrk2   | 948.5267145 | 0.158594537 | 0.182697055 | 0.868073857 | 0.385353902 | 0.477539676 |
| Sfr1    | 746.8493418 | 0.158583585 | 0.114566541 | 1.384205051 | 0.166295677 | 0.237358398 |
| Myo1e   | 1068.687234 | 0.158467181 | 0.119967974 | 1.32091238  | 0.186530582 | 0.261651229 |
| Gm10335 | 4.549240388 | 0.158032148 | 1.213705719 | 0.130206314 | 0.896403199 | 0.924043363 |
| Gtf3c3  | 272.8018684 | 0.157793008 | 0.189094001 | 0.83446861  | 0.404016969 | 0.496910849 |
| Ap4e1   | 170.6353895 | 0.157754401 | 0.252872093 | 0.623850575 | 0.532725722 | 0.620351932 |
| Ttc33   | 251.0527235 | 0.157752784 | 0.270628365 | 0.582912971 | 0.559951888 | 0.645047624 |
| Rai2    | 42.69814683 | 0.157727428 | 0.537431429 | 0.293483818 | 0.769152366 | 0.824841765 |
| Ism2    | 3.509622698 | 0.157546557 | 1.139154451 | 0.138301313 | 0.890002288 | 0.919393989 |
| Dusp28  | 158.3430293 | 0.157459401 | 0.3069193   | 0.513031929 | 0.607928986 | 0.689093973 |
| E2f8    | 120.0087225 | 0.157076861 | 0.471577295 | 0.333088261 | 0.739067661 | 0.800232246 |
| Gm17420 | 9.123839276 | 0.156972468 | 0.663489833 | 0.236586095 | 0.812977909 | 0.86015313  |
| Ralgps2 | 315.7324521 | 0.156832952 | 0.211301773 | 0.742222602 | 0.457952476 | 0.548638018 |
| Slc38a9 | 286.7914275 | 0.156802667 | 0.337792636 | 0.464198004 | 0.642505891 | 0.719343301 |
| Fam32a  | 827.6282628 | 0.156492545 | 0.137369773 | 1.139206549 | 0.254617015 | 0.339462803 |
| Fam204a | 116.9952976 | 0.156483146 | 0.296887956 | 0.527078121 | 0.59813934  | 0.680622044 |
| Hnrnpa3 | 3849.97276  | 0.156390315 | 0.190167332 | 0.822382654 | 0.410859148 | 0.503112108 |
| Dao     | 0.875922284 | 0.156309636 | 2.2635885   | 0.06905391  | 0.944946708 | NA          |
| Mep1b   | 3.286726286 | 0.156286959 | 1.076229899 | 0.145217076 | 0.884539484 | 0.915359301 |
| Pigp    | 312.5943282 | 0.156285373 | 0.238580568 | 0.655063294 | 0.512427004 | 0.601558456 |
| Supg2   | 436.4404766 | 0.15614458  | 0.207721416 | 0.751701884 | 0.452230357 | 0.543122446 |
| Ubl1a   | 653.5267486 | 0.155944813 | 0.166791579 | 0.93496814  | 0.349804719 | 0.442361164 |
| Med6    | 237.0433859 | 0.155938068 | 0.232155214 | 0.671697462 | 0.501776318 | 0.591214504 |
| Lrrc14  | 230.4552135 | 0.155779683 | 0.163631922 | 0.952012792 | 0.341090494 | 0.433398729 |
| Olfr769 | 25.77943167 | 0.155519486 | 0.377343574 | 0.412142928 | 0.680234666 | 0.751272388 |
| Stbd1   | 1317.327571 | 0.155056421 | 0.252443831 | 0.614221471 | 0.539068987 | 0.62623837  |
| Inpp5f  | 523.5053664 | 0.154954252 | 0.195187186 | 0.793875126 | 0.427268132 | 0.519326045 |
| Ranbp3l | 66.24019804 | 0.154723861 | 0.275301156 | 0.56201675  | 0.574104607 | 0.657850495 |
| Prr13   | 932.4999924 | 0.154641625 | 0.162846505 | 0.949615868 | 0.342307473 | 0.434685869 |
| Olfr720 | 1.584884716 | 0.154520223 | 1.547026532 | 0.099882077 | 0.920437946 | NA          |
| Fzd10   | 1.078713549 | 0.154426326 | 1.943169623 | 0.079471356 | 0.936657714 | NA          |
| Phpt1   | 379.7754624 | 0.153905272 | 0.160621906 | 0.958183574 | 0.337970198 | 0.430107192 |
| Ercc8   | 63.76719473 | 0.153863761 | 0.301866892 | 0.50970731  | 0.610256531 | 0.691153506 |
| Lancl1  | 517.3908647 | 0.153706412 | 0.188914633 | 0.813628941 | 0.415857553 | 0.507919441 |
| Sephs1  | 707.5629799 | 0.153551761 | 0.128536613 | 1.194614961 | 0.232237501 | 0.314810392 |
| Snapc3  | 169.2853647 | 0.153452005 | 0.172313172 | 0.890541346 | 0.373175278 | 0.46542484  |
| Evi5l   | 124.7942365 | 0.152859225 | 0.242355403 | 0.630723404 | 0.528221394 | 0.616324572 |
| Ing4    | 846.9457576 | 0.15278722  | 0.205199593 | 0.744578573 | 0.456526525 | 0.547318158 |
| Zfp956  | 165.0395327 | 0.15264672  | 0.256132804 | 0.595967082 | 0.551197218 | 0.636812833 |
| Naa50   | 1136.777275 | 0.152488033 | 0.135475769 | 1.125574218 | 0.260345786 | 0.345452597 |
| Ranbp2  | 1398.510296 | 0.152417876 | 0.176732386 | 0.862421877 | 0.388455406 | 0.480823913 |
| Mipol1  | 70.60050379 | 0.152319852 | 0.357153889 | 0.426482411 | 0.669756362 | 0.742393138 |
| Carf    | 128.5498452 | 0.152139063 | 0.221712855 | 0.686198658 | 0.492587844 | 0.582481623 |
| Dnajc2  | 404.7417374 | 0.152082729 | 0.195442786 | 0.778144498 | 0.436483833 | 0.527892762 |
| Phf1    | 585.0801352 | 0.152040253 | 0.237913107 | 0.639057912 | 0.522785259 | 0.611194835 |
| Mecp2   | 433.6522737 | 0.151871862 | 0.152357989 | 0.996809307 | 0.31885708  | 0.410223794 |
| Relch   | 494.6492883 | 0.15163202  | 0.149776469 | 1.012388799 | 0.311352192 | 0.402177009 |
| Olfr293 | 5.887529552 | 0.151615183 | 0.938328816 | 0.161580013 | 0.871636598 | 0.904918136 |
| Phrf1   | 682.2756227 | 0.151587667 | 0.185287309 | 0.818122233 | 0.413287395 | 0.505540899 |
| Napa    | 1319.326347 | 0.151548208 | 0.173066256 | 0.87566584  | 0.381211721 | 0.473232172 |
| Exoc5   | 448.7281666 | 0.151207257 | 0.211792453 | 0.713940726 | 0.475263833 | 0.566119188 |
| Sub1    | 1028.967602 | 0.151158274 | 0.184006303 | 0.821484221 | 0.411370508 | 0.503629761 |

|            |             |             |             |             |             |    |             |
|------------|-------------|-------------|-------------|-------------|-------------|----|-------------|
| Gm10080    | 0.399926272 | 0.151137585 | 3.197923419 | 0.047261165 | 0.96230508  | NA |             |
| Cul1       | 1369.534472 | 0.150972802 | 0.184101505 | 0.820051969 | 0.412186482 |    | 0.50433899  |
| Ttc7       | 659.9986556 | 0.150891733 | 0.187031965 | 0.806769976 | 0.419799144 |    | 0.511643679 |
| Ptk2b      | 892.8006778 | 0.150668063 | 0.155172607 | 0.970970752 | 0.331562844 |    | 0.423756156 |
| Mkrn2      | 292.073961  | 0.150637004 | 0.217540182 | 0.692455997 | 0.488651011 |    | 0.57862905  |
| Gcn1       | 1158.361592 | 0.150528304 | 0.177928903 | 0.846002537 | 0.397551329 |    | 0.490338233 |
| Gm7511     | 0.925157869 | 0.150524514 | 1.98105682  | 0.075981927 | 0.939433477 | NA |             |
| Gtf2f1     | 522.5251731 | 0.150360094 | 0.143860772 | 1.045177863 | 0.295940772 |    | 0.385453303 |
| Col26a1    | 16.44425577 | 0.150285139 | 0.523657397 | 0.286991342 | 0.77411895  |    | 0.829372145 |
| Meis1      | 84.86387494 | 0.150271121 | 0.297013294 | 0.505940724 | 0.612898262 |    | 0.693527783 |
| Slc15a4    | 325.042071  | 0.150057541 | 0.28920256  | 0.518866574 | 0.603853789 |    | 0.685437645 |
| Fbxo33     | 172.64448   | 0.149816553 | 0.206510091 | 0.725468437 | 0.468164702 |    | 0.558716964 |
| Pcmt1      | 626.2258965 | 0.149688549 | 0.145883358 | 1.026083792 | 0.304852089 |    | 0.39497784  |
| Klhl28     | 140.8552935 | 0.149455273 | 0.211912405 | 0.705269107 | 0.480642782 |    | 0.570939392 |
| Nubp1      | 449.9000234 | 0.149394929 | 0.164448314 | 0.908461297 | 0.363634553 |    | 0.456027796 |
| Spata31d1a | 2.311829502 | 0.149310346 | 1.292801488 | 0.115493637 | 0.908053863 |    | 0.932335718 |
| Dnali1     | 2.623876957 | 0.149307986 | 1.177115385 | 0.126842269 | 0.89906524  |    | 0.925838974 |
| Huwe1      | 3782.372342 | 0.149190264 | 0.161903544 | 0.921476209 | 0.356801857 |    | 0.449177231 |
| Knop1      | 575.4708113 | 0.149086805 | 0.159378089 | 0.935428489 | 0.349567521 |    | 0.442093998 |
| Tmem9b     | 383.870347  | 0.148980786 | 0.149852474 | 0.994183028 | 0.320133769 |    | 0.411494483 |
| Aff2       | 2.836699034 | 0.148941314 | 1.150430703 | 0.129465698 | 0.896989166 |    | 0.924374935 |
| Ggn        | 8.130325857 | 0.148764564 | 0.839851978 | 0.177131885 | 0.859404798 |    | 0.895722037 |
| Trappc12   | 410.6934944 | 0.148522936 | 0.193448125 | 0.767766223 | 0.442626085 |    | 0.533693295 |
| Sh2d1a     | 3.397421457 | 0.148441027 | 1.019198795 | 0.145644822 | 0.884201783 |    | 0.915065379 |
| Kat2a      | 572.1629394 | 0.148349708 | 0.149285982 | 0.993728321 | 0.320355151 |    | 0.411624818 |
| Nectin3    | 863.2944966 | 0.148225232 | 0.143530545 | 1.032708628 | 0.301740275 |    | 0.391600807 |
| Slc35b2    | 715.2645782 | 0.148139204 | 0.168380391 | 0.879788931 | 0.378973662 |    | 0.47093396  |
| Gm48113    | 36.15973238 | 0.148067966 | 0.544318876 | 0.272024309 | 0.785603328 |    | 0.837845827 |
| Cd46       | 56.74263876 | 0.147804438 | 0.340341295 | 0.434282998 | 0.664082949 |    | 0.737577136 |
| Kidins220  | 1068.410346 | 0.14757235  | 0.209593497 | 0.7040884   | 0.481377723 |    | 0.571644429 |
| AC133103.7 | 0.119022055 | 0.147526206 | 3.644628725 | 0.040477705 | 0.967122281 | NA |             |
| Srrm1      | 1007.585883 | 0.147381162 | 0.18280846  | 0.80620537  | 0.420124443 |    | 0.511987651 |
| Cndp1      | 2.563098047 | 0.147362645 | 1.075885132 | 0.136968753 | 0.891055494 |    | 0.919924548 |
| Gapvd1     | 888.9894029 | 0.147095096 | 0.156795113 | 0.938135718 | 0.348174668 |    | 0.440659372 |
| Tomm22     | 1015.866233 | 0.146869634 | 0.129240833 | 1.136402717 | 0.255788059 |    | 0.340730961 |
| Cd160      | 4.268419503 | 0.146745401 | 1.252698101 | 0.117143469 | 0.906746364 |    | 0.931273692 |
| Pdzrn3     | 80.76198638 | 0.146717582 | 0.284360701 | 0.515955903 | 0.605885208 |    | 0.687360668 |
| Gm20946    | 0.417190553 | 0.14659332  | 3.152151186 | 0.046505802 | 0.96290711  | NA |             |
| Nf1        | 596.892782  | 0.146514651 | 0.188211619 | 0.778456992 | 0.436299652 |    | 0.527739905 |
| Brd4       | 1298.689535 | 0.146500685 | 0.141931553 | 1.032192502 | 0.301981947 |    | 0.391860815 |
| Erbp4      | 79.56596879 | 0.146469679 | 0.533117241 | 0.274741966 | 0.783514487 |    | 0.836272313 |
| Zfp560     | 95.10040262 | 0.146258509 | 0.278527138 | 0.525114033 | 0.599503921 |    | 0.681674305 |
| Eaf1       | 737.2079655 | 0.145883497 | 0.15236609  | 0.957453836 | 0.338338237 |    | 0.43051129  |
| Ncoa2      | 757.3598849 | 0.145847847 | 0.15898817  | 0.917350307 | 0.358959104 |    | 0.451293127 |
| Xpnp3      | 343.3687148 | 0.145732838 | 0.188170777 | 0.774471147 | 0.438652224 |    | 0.529962137 |
| Ddx25      | 0.801123518 | 0.145620003 | 2.432344445 | 0.059868167 | 0.952260634 | NA |             |
| Ipo13      | 306.1985734 | 0.145472682 | 0.177136782 | 0.82124492  | 0.411506775 |    | 0.503688074 |
| Nxf7       | 0.671063033 | 0.14518064  | 2.953692042 | 0.04915226  | 0.960797956 | NA |             |
| Fer        | 127.2236425 | 0.144912296 | 0.203812268 | 0.711008698 | 0.477078846 |    | 0.567527748 |
| Apol7e     | 44.84984491 | 0.144783329 | 0.505977623 | 0.286145716 | 0.774766518 |    | 0.829609924 |
| Bcl2l12    | 156.0216309 | 0.144747152 | 0.203213489 | 0.712291062 | 0.476284557 |    | 0.566978503 |
| Gm21939    | 0.918751247 | 0.144256325 | 2.265376106 | 0.063678753 | 0.949226023 | NA |             |
| Phkg1      | 34.02848956 | 0.144175556 | 0.387219052 | 0.372335904 | 0.709642769 |    | 0.775561891 |
| Zfp78      | 25.23080064 | 0.143973845 | 0.520153947 | 0.276790834 | 0.78194072  |    | 0.835245952 |
| Tmem60     | 204.4978025 | 0.143949954 | 0.208372798 | 0.690828919 | 0.48967306  |    | 0.579517273 |
| Slc35b3    | 426.688082  | 0.143914162 | 0.161590389 | 0.890610897 | 0.373137951 |    | 0.465412335 |
| Ctcf       | 662.4485411 | 0.143905902 | 0.163637376 | 0.879419514 | 0.379173855 |    | 0.47111405  |
| Ccdc28b    | 86.45025435 | 0.143858891 | 0.263851962 | 0.545225777 | 0.585598245 |    | 0.668685774 |
| Ppp1r10    | 667.6060602 | 0.143602327 | 0.218363714 | 0.657629076 | 0.510776506 |    | 0.600077037 |
| Zfp385b    | 367.0884329 | 0.143589568 | 0.325916022 | 0.440572288 | 0.659522669 |    | 0.734008516 |
| Chmp3      | 1051.654504 | 0.1431384   | 0.170343643 | 0.840292    | 0.400744686 |    | 0.493812461 |
| Ccdc184    | 2.309226476 | 0.143010017 | 1.424262396 | 0.100409881 | 0.920018926 |    | 0.940880783 |
| Fcrla      | 6.128216106 | 0.142956833 | 0.821587282 | 0.174000787 | 0.861864844 |    | 0.897835128 |
| Pde4d      | 44.79926824 | 0.142937734 | 0.329651689 | 0.433602311 | 0.664577256 |    | 0.73789977  |
| Rpn1       | 3066.244457 | 0.142480394 | 0.177792226 | 0.801387086 | 0.422907589 |    | 0.514576303 |
| Tesmin     | 18.41499762 | 0.142216883 | 0.465099054 | 0.305777622 | 0.759773968 |    | 0.817148861 |



|               |             |             |             |             |                |             |
|---------------|-------------|-------------|-------------|-------------|----------------|-------------|
| Glr3          | 1213.159624 | 0.141936763 | 0.21826517  | 0.650295066 | 0.515501644    | 0.604171045 |
| Btbd8         | 62.96195979 | 0.141878587 | 0.336620785 | 0.421478986 | 0.673405353    | 0.745274893 |
| CommD2        | 235.7982776 | 0.141775252 | 0.211318301 | 0.670908535 | 0.502278799    | 0.591724757 |
| Dele1         | 610.7858628 | 0.141683805 | 0.162003093 | 0.874574693 | 0.381805362    | 0.4738311   |
| Dcaf13        | 460.7776758 | 0.141188139 | 0.165392358 | 0.853655756 | 0.393295755    | 0.485868222 |
| Chek2         | 79.98398163 | 0.141002025 | 0.285502861 | 0.493872544 | 0.621396196    | 0.700678771 |
| Wdr24         | 344.486144  | 0.140629488 | 0.196131819 | 0.717015163 | 0.473364741    | 0.564093534 |
| Pcm1          | 509.0685298 | 0.140519692 | 0.184116789 | 0.763209554 | 0.445338432    | 0.536432529 |
| Plaat3        | 169.6973718 | 0.140242382 | 0.233235698 | 0.601290385 | 0.547646593    | 0.633651423 |
| Clcn3         | 825.4201659 | 0.140189772 | 0.139333772 | 1.006143517 | 0.314346538    | 0.405553185 |
| Srsf6         | 3395.026404 | 0.140171205 | 0.121209035 | 1.156441887 | 0.247500457    | 0.33153043  |
| Cd3eap        | 153.0284815 | 0.140080766 | 0.243583558 | 0.575083011 | 0.565235157    | 0.649422359 |
| Nkrf          | 75.74203061 | 0.140047296 | 0.311041341 | 0.450252997 | 0.652528026    | 0.727839426 |
| Trappc6b      | 529.6400869 | 0.139988025 | 0.203750491 | 0.687056138 | 0.492047353    | 0.581923224 |
| Lysmd4        | 164.9910103 | 0.139978608 | 0.190422667 | 0.735094253 | 0.462282094    | 0.552857604 |
| H2-D1         | 10613.70242 | 0.13956413  | 0.199684749 | 0.698922328 | 0.484600573    | 0.574950975 |
| Fam45a        | 371.2026958 | 0.139320012 | 0.175823504 | 0.792385597 | 0.428135875    | 0.520010002 |
| Uhrf1bp1      | 397.9103556 | 0.139249722 | 0.207180414 | 0.672118177 | 0.501508466    | 0.590941525 |
| Fau           | 1349.315779 | 0.139073575 | 0.148281029 | 0.937905381 | 0.348293038    | 0.440743743 |
| Unc119        | 156.9902119 | 0.138998795 | 0.229679735 | 0.605185282 | 0.545055894    | 0.631343449 |
| Dennd6b       | 279.9986065 | 0.13891362  | 0.286203954 | 0.485365832 | 0.627416865    | 0.706118653 |
| Lima1         | 925.9683437 | 0.138907056 | 0.17209405  | 0.807157806 | 0.419575571    | 0.511507747 |
| Cldn3         | 2037.442961 | 0.138904609 | 0.243364067 | 0.570768771 | 0.568156394    | 0.652295118 |
| Ddost         | 2103.548034 | 0.138807099 | 0.193227559 | 0.718360778 | 0.472534864    | 0.563183331 |
| Sic12a2       | 150.3170592 | 0.138803977 | 0.303642536 | 0.457129554 | 0.647577929    | 0.723454032 |
| Zc2hc1c       | 71.94856944 | 0.138669171 | 0.27865078  | 0.497645012 | 0.618734272    | 0.698601356 |
| Bace2         | 63.51581997 | 0.138451771 | 0.288180125 | 0.480434835 | 0.630918229    | 0.709304535 |
| Vegfb         | 292.2456278 | 0.138334367 | 0.210492028 | 0.657195282 | 0.511055359    | 0.600300339 |
| Gm8797        | 3.843602424 | 0.138151908 | 1.213626367 | 0.11383397  | 0.909369409    | 0.933405364 |
| Elk4          | 903.9791595 | 0.138138254 | 0.166399416 | 0.830160688 | 0.406447938    | 0.499072634 |
| Vps11         | 637.4519181 | 0.138137606 | 0.173121228 | 0.797924134 | 0.424914517    | 0.516796939 |
| Gm38394       | 312.838088  | 0.138025813 | 0.299532799 | 0.460803669 | 0.644939469    | 0.72132808  |
| Lats1         | 629.0260219 | 0.137893378 | 0.136779972 | 1.008140122 | 0.313387199    | 0.40444926  |
| Gm14766       | 0.905374605 | 0.137843211 | 2.322034104 | 0.059363129 | 0.95266288 NA  |             |
| Gm12591       | 2.534056506 | 0.137815902 | 1.258413031 | 0.109515635 | 0.912793521    | 0.935849408 |
| Rpl19         | 7595.769207 | 0.137642579 | 0.109692034 | 1.254809251 | 0.209548013    | 0.288303973 |
| Mad2l2        | 387.3516817 | 0.137464621 | 0.201898364 | 0.680860497 | 0.495959766    | 0.585859346 |
| Gm21981       | 14.54101893 | 0.137321765 | 0.608512919 | 0.225667788 | 0.821459813    | 0.866653066 |
| Raet1e        | 166.3992138 | 0.137171313 | 0.477712548 | 0.28714195  | 0.774003632    | 0.829313929 |
| Nfrkb         | 345.7139893 | 0.137100049 | 0.185009543 | 0.741043123 | 0.458667294    | 0.549305235 |
| Mustn1        | 67.07319677 | 0.137068403 | 0.382307687 | 0.358529028 | 0.719947449    | 0.784298636 |
| Gm17081       | 5.078154728 | 0.137037538 | 0.880729354 | 0.155595516 | 0.87635186     | 0.909038424 |
| Mras          | 77.61864139 | 0.136741684 | 0.35183071  | 0.388657614 | 0.697529441    | 0.765848557 |
| Gtpbp2        | 1106.310634 | 0.136656012 | 0.143251725 | 0.953957183 | 0.340105316    | 0.432469265 |
| Gng5-ps       | 0.111096273 | 0.136288671 | 3.644954017 | 0.037391054 | 0.970173206 NA |             |
| Gm16439       | 0.135641121 | 0.136204508 | 3.644566211 | 0.037371939 | 0.970188446 NA |             |
| Chd1          | 569.0713879 | 0.136192344 | 0.180846334 | 0.753083245 | 0.451399892    | 0.542392541 |
| Meak7         | 152.9566861 | 0.136156655 | 0.210807846 | 0.645880397 | 0.518356816    | 0.606974861 |
| 2610002M06Rik | 326.231276  | 0.135814233 | 0.228538771 | 0.594272178 | 0.552330084    | 0.637732697 |
| Ccnk          | 359.7705884 | 0.135741983 | 0.159493095 | 0.851083758 | 0.394722827    | 0.487378486 |
| Abcf1         | 1132.419703 | 0.135554582 | 0.107288269 | 1.263461358 | 0.206423425    | 0.284951692 |
| Cnot2         | 642.8656496 | 0.135550176 | 0.130410429 | 1.039412086 | 0.298613126    | 0.38816291  |
| Gm12846       | 0.122447512 | 0.135414644 | 3.644561856 | 0.03715526  | 0.970361211 NA |             |
| Gatd1         | 373.5293272 | 0.135375586 | 0.175549914 | 0.771151536 | 0.440617116    | 0.531872874 |
| Gm1943        | 0.135792682 | 0.135278351 | 3.644561104 | 0.037117871 | 0.970391022 NA |             |
| Prrc2a        | 2879.75869  | 0.135180211 | 0.201957293 | 0.669350478 | 0.503271934    | 0.592649024 |
| Mettl7a3      | 0.417053967 | 0.135131671 | 3.153127298 | 0.042856396 | 0.965816008 NA |             |
| Lrrc56        | 79.31143064 | 0.134915675 | 0.251437707 | 0.536576937 | 0.591559878    | 0.674305483 |
| Wdr46-ps      | 0.423259933 | 0.134908069 | 3.136836199 | 0.043007687 | 0.965695406 NA |             |
| 2410131K14Rik | 132.5650106 | 0.134803698 | 0.21449646  | 0.62846584  | 0.529698818    | 0.617583466 |
| Mcoln3        | 0.410899809 | 0.134659791 | 3.169657828 | 0.042484015 | 0.966112854 NA |             |
| Rab6a         | 1068.841879 | 0.134612297 | 0.14114615  | 0.953708596 | 0.340231168    | 0.432564766 |
| Zbtb40        | 191.7496857 | 0.134495969 | 0.293002456 | 0.459026762 | 0.646214948    | 0.722310021 |
| Rcor3         | 248.8072429 | 0.134353329 | 0.196384791 | 0.684133067 | 0.493891143    | 0.58369887  |
| Ccdc6         | 526.5452071 | 0.134112219 | 0.152210186 | 0.881098844 | 0.378264323    | 0.470258162 |
| Gm9030        | 0.41704267  | 0.134074673 | 3.153211961 | 0.042520032 | 0.966084143 NA |             |

|               |             |             |             |             |             |             |
|---------------|-------------|-------------|-------------|-------------|-------------|-------------|
| Dhx8          | 360.5125805 | 0.134053894 | 0.151089793 | 0.887246527 | 0.374946188 | 0.467042913 |
| Rbm4b         | 326.3182516 | 0.133992018 | 0.167169358 | 0.80153456  | 0.422822245 | 0.514545909 |
| Msl3          | 449.0622702 | 0.133966962 | 0.163297058 | 0.820388093 | 0.411994901 | 0.504140761 |
| Akr1c19       | 1439.555679 | 0.13382826  | 0.3383689   | 0.395509929 | 0.692466596 | 0.761820503 |
| Dnajc7        | 1313.94466  | 0.133395474 | 0.199358924 | 0.669122164 | 0.503417553 | 0.592738617 |
| Sf3b6         | 540.4179142 | 0.133380841 | 0.25583204  | 0.521360971 | 0.602115334 | 0.683868236 |
| Eef1a1        | 65728.93874 | 0.133320659 | 0.151536888 | 0.879790134 | 0.37897301  | 0.47093396  |
| Lin7c         | 796.0179065 | 0.133238624 | 0.178839163 | 0.745019278 | 0.456260066 | 0.547094493 |
| Mcts2         | 106.0802582 | 0.133160297 | 0.318817019 | 0.417669976 | 0.676188427 | 0.747723961 |
| Rars          | 732.0236361 | 0.132791119 | 0.145456854 | 0.912924454 | 0.361282275 | 0.453678567 |
| Bmp1          | 2870.815128 | 0.132756022 | 0.179341831 | 0.740240137 | 0.459154297 | 0.549695397 |
| AC149294.1    | 7.776239217 | 0.13257523  | 0.710422619 | 0.186614596 | 0.851962822 | 0.8904667   |
| Gm42561       | 0.136233566 | 0.13253719  | 3.644545995 | 0.036365899 | 0.970990605 | NA          |
| Rev3l         | 258.3926858 | 0.132450383 | 0.23270318  | 0.569181666 | 0.569232861 | 0.653398991 |
| Olfr322       | 0.424243943 | 0.132397865 | 3.134801464 | 0.042234849 | 0.966311482 | NA          |
| Spp2          | 2292.588689 | 0.132207162 | 0.21698555  | 0.609290166 | 0.542332124 | 0.629086076 |
| Gm4017        | 3.373979296 | 0.132143688 | 1.350628301 | 0.097838678 | 0.922060394 | 0.942346718 |
| Eed           | 325.3309349 | 0.132095104 | 0.166065077 | 0.795441798 | 0.426356554 | 0.518328927 |
| Sf3a3         | 378.0275909 | 0.131818945 | 0.139393171 | 0.945662862 | 0.34432057  | 0.43661557  |
| Cenpj         | 81.0597996  | 0.131747259 | 0.315066614 | 0.418156824 | 0.675832451 | 0.747475777 |
| Clasrp        | 514.2761287 | 0.131668471 | 0.164987539 | 0.798051004 | 0.424840893 | 0.51678113  |
| Trim33        | 395.2844026 | 0.131589485 | 0.161992548 | 0.812318137 | 0.416609106 | 0.508568174 |
| Srrt          | 1513.991717 | 0.131526887 | 0.209037541 | 0.629202229 | 0.529216669 | 0.617147943 |
| Kif13b        | 836.3364759 | 0.131171252 | 0.193206625 | 0.678916947 | 0.497190487 | 0.586987772 |
| Cnot6l        | 681.3403258 | 0.13116242  | 0.220133345 | 0.595831677 | 0.55128768  | 0.636874186 |
| 1700009N14Rik | 0.129307163 | 0.130869084 | 3.644536806 | 0.03590829  | 0.971355486 | NA          |
| 1700012B07Rik | 0.129307163 | 0.130869084 | 3.644536806 | 0.03590829  | 0.971355486 | NA          |
| 1700022A21Rik | 0.129307163 | 0.130869084 | 3.644536806 | 0.03590829  | 0.971355486 | NA          |
| 1700024B05Rik | 0.129307163 | 0.130869084 | 3.644536806 | 0.03590829  | 0.971355486 | NA          |
| 1700025B11Rik | 0.136516553 | 0.130869084 | 3.644536806 | 0.03590829  | 0.971355486 | NA          |
| 1700025C18Rik | 0.136516553 | 0.130869084 | 3.644536806 | 0.03590829  | 0.971355486 | NA          |
| 1700029F12Rik | 0.136516553 | 0.130869084 | 3.644536806 | 0.03590829  | 0.971355486 | NA          |
| 1700029H14Rik | 0.136516553 | 0.130869084 | 3.644536806 | 0.03590829  | 0.971355486 | NA          |
| 4930544D05Rik | 0.113127186 | 0.130869084 | 3.644536806 | 0.03590829  | 0.971355486 | NA          |
| 4933402D24Rik | 0.113127186 | 0.130869084 | 3.644536806 | 0.03590829  | 0.971355486 | NA          |
| A630095N17Rik | 0.129307163 | 0.130869084 | 3.644536806 | 0.03590829  | 0.971355486 | NA          |
| A830031A19Rik | 0.136516553 | 0.130869084 | 3.644536806 | 0.03590829  | 0.971355486 | NA          |
| AC133103.3    | 0.123120476 | 0.130869084 | 3.644536806 | 0.03590829  | 0.971355486 | NA          |
| AC140325.4    | 0.113127186 | 0.130869084 | 3.644536806 | 0.03590829  | 0.971355486 | NA          |
| Acan          | 0.129307163 | 0.130869084 | 3.644536806 | 0.03590829  | 0.971355486 | NA          |
| Adad1         | 0.129307163 | 0.130869084 | 3.644536806 | 0.03590829  | 0.971355486 | NA          |
| Adamts19      | 0.136516553 | 0.130869084 | 3.644536806 | 0.03590829  | 0.971355486 | NA          |
| Adamts20      | 0.129307163 | 0.130869084 | 3.644536806 | 0.03590829  | 0.971355486 | NA          |
| Adgrf3        | 0.123120476 | 0.130869084 | 3.644536806 | 0.03590829  | 0.971355486 | NA          |
| AF067061      | 0.113127186 | 0.130869084 | 3.644536806 | 0.03590829  | 0.971355486 | NA          |
| Armh2         | 0.123120476 | 0.130869084 | 3.644536806 | 0.03590829  | 0.971355486 | NA          |
| Art1          | 0.123120476 | 0.130869084 | 3.644536806 | 0.03590829  | 0.971355486 | NA          |
| Asic4         | 0.123120476 | 0.130869084 | 3.644536806 | 0.03590829  | 0.971355486 | NA          |
| Atp5l-ps2     | 0.113127186 | 0.130869084 | 3.644536806 | 0.03590829  | 0.971355486 | NA          |
| B020004J07Rik | 0.136516553 | 0.130869084 | 3.644536806 | 0.03590829  | 0.971355486 | NA          |
| B020011L13Rik | 0.113127186 | 0.130869084 | 3.644536806 | 0.03590829  | 0.971355486 | NA          |
| Bpifb1        | 0.129307163 | 0.130869084 | 3.644536806 | 0.03590829  | 0.971355486 | NA          |
| Catsperz      | 0.136516553 | 0.130869084 | 3.644536806 | 0.03590829  | 0.971355486 | NA          |
| Ccdc177       | 0.129307163 | 0.130869084 | 3.644536806 | 0.03590829  | 0.971355486 | NA          |
| Ccdc201       | 0.136516553 | 0.130869084 | 3.644536806 | 0.03590829  | 0.971355486 | NA          |
| Cct8l1        | 0.129307163 | 0.130869084 | 3.644536806 | 0.03590829  | 0.971355486 | NA          |
| Cdcp3         | 0.136516553 | 0.130869084 | 3.644536806 | 0.03590829  | 0.971355486 | NA          |
| Celf3         | 0.113127186 | 0.130869084 | 3.644536806 | 0.03590829  | 0.971355486 | NA          |
| Chit1         | 0.129307163 | 0.130869084 | 3.644536806 | 0.03590829  | 0.971355486 | NA          |
| Cldn22        | 0.129307163 | 0.130869084 | 3.644536806 | 0.03590829  | 0.971355486 | NA          |
| Cnga2         | 0.129307163 | 0.130869084 | 3.644536806 | 0.03590829  | 0.971355486 | NA          |
| Cplx1         | 0.129307163 | 0.130869084 | 3.644536806 | 0.03590829  | 0.971355486 | NA          |
| Cpne6         | 0.129307163 | 0.130869084 | 3.644536806 | 0.03590829  | 0.971355486 | NA          |
| Crry-ps       | 0.136516553 | 0.130869084 | 3.644536806 | 0.03590829  | 0.971355486 | NA          |
| Crxos         | 0.136516553 | 0.130869084 | 3.644536806 | 0.03590829  | 0.971355486 | NA          |
| CU682339.1    | 0.123120476 | 0.130869084 | 3.644536806 | 0.03590829  | 0.971355486 | NA          |

|           |             |             |             |            |             |    |
|-----------|-------------|-------------|-------------|------------|-------------|----|
| Cyct      | 0.123120476 | 0.130869084 | 3.644536806 | 0.03590829 | 0.971355486 | NA |
| Cyp2b23   | 0.136516553 | 0.130869084 | 3.644536806 | 0.03590829 | 0.971355486 | NA |
| D9Wsu149  | 0.129307163 | 0.130869084 | 3.644536806 | 0.03590829 | 0.971355486 | NA |
| Dbx2      | 0.129307163 | 0.130869084 | 3.644536806 | 0.03590829 | 0.971355486 | NA |
| Ddi1      | 0.113127186 | 0.130869084 | 3.644536806 | 0.03590829 | 0.971355486 | NA |
| Eif1-ps1  | 0.123120476 | 0.130869084 | 3.644536806 | 0.03590829 | 0.971355486 | NA |
| Eif4a3l2  | 0.136516553 | 0.130869084 | 3.644536806 | 0.03590829 | 0.971355486 | NA |
| Elmod1    | 0.136516553 | 0.130869084 | 3.644536806 | 0.03590829 | 0.971355486 | NA |
| En1       | 0.113127186 | 0.130869084 | 3.644536806 | 0.03590829 | 0.971355486 | NA |
| Fabp9     | 0.129307163 | 0.130869084 | 3.644536806 | 0.03590829 | 0.971355486 | NA |
| Faiml     | 0.136516553 | 0.130869084 | 3.644536806 | 0.03590829 | 0.971355486 | NA |
| Fam220-ps | 0.136516553 | 0.130869084 | 3.644536806 | 0.03590829 | 0.971355486 | NA |
| Fbxw13    | 0.136516553 | 0.130869084 | 3.644536806 | 0.03590829 | 0.971355486 | NA |
| Fbxw23    | 0.136516553 | 0.130869084 | 3.644536806 | 0.03590829 | 0.971355486 | NA |
| Fcnb      | 0.113127186 | 0.130869084 | 3.644536806 | 0.03590829 | 0.971355486 | NA |
| Ffar3     | 0.136516553 | 0.130869084 | 3.644536806 | 0.03590829 | 0.971355486 | NA |
| Fgf22     | 0.129307163 | 0.130869084 | 3.644536806 | 0.03590829 | 0.971355486 | NA |
| Gfi1b     | 0.136516553 | 0.130869084 | 3.644536806 | 0.03590829 | 0.971355486 | NA |
| Gh        | 0.123120476 | 0.130869084 | 3.644536806 | 0.03590829 | 0.971355486 | NA |
| Gm10139   | 0.123120476 | 0.130869084 | 3.644536806 | 0.03590829 | 0.971355486 | NA |
| Gm10155   | 0.136516553 | 0.130869084 | 3.644536806 | 0.03590829 | 0.971355486 | NA |
| Gm10161   | 0.113127186 | 0.130869084 | 3.644536806 | 0.03590829 | 0.971355486 | NA |
| Gm10190   | 0.113127186 | 0.130869084 | 3.644536806 | 0.03590829 | 0.971355486 | NA |
| Gm10197   | 0.136516553 | 0.130869084 | 3.644536806 | 0.03590829 | 0.971355486 | NA |
| Gm10401   | 0.136516553 | 0.130869084 | 3.644536806 | 0.03590829 | 0.971355486 | NA |
| Gm10735   | 0.129307163 | 0.130869084 | 3.644536806 | 0.03590829 | 0.971355486 | NA |
| Gm11214   | 0.129307163 | 0.130869084 | 3.644536806 | 0.03590829 | 0.971355486 | NA |
| Gm11273   | 0.129307163 | 0.130869084 | 3.644536806 | 0.03590829 | 0.971355486 | NA |
| Gm11434   | 0.123120476 | 0.130869084 | 3.644536806 | 0.03590829 | 0.971355486 | NA |
| Gm11440   | 0.136516553 | 0.130869084 | 3.644536806 | 0.03590829 | 0.971355486 | NA |
| Gm11597   | 0.136516553 | 0.130869084 | 3.644536806 | 0.03590829 | 0.971355486 | NA |
| Gm11694   | 0.136516553 | 0.130869084 | 3.644536806 | 0.03590829 | 0.971355486 | NA |
| Gm11718   | 0.136516553 | 0.130869084 | 3.644536806 | 0.03590829 | 0.971355486 | NA |
| Gm11737   | 0.136516553 | 0.130869084 | 3.644536806 | 0.03590829 | 0.971355486 | NA |
| Gm11760   | 0.136516553 | 0.130869084 | 3.644536806 | 0.03590829 | 0.971355486 | NA |
| Gm11835   | 0.113127186 | 0.130869084 | 3.644536806 | 0.03590829 | 0.971355486 | NA |
| Gm11881   | 0.113127186 | 0.130869084 | 3.644536806 | 0.03590829 | 0.971355486 | NA |
| Gm11922   | 0.136516553 | 0.130869084 | 3.644536806 | 0.03590829 | 0.971355486 | NA |
| Gm11957   | 0.129307163 | 0.130869084 | 3.644536806 | 0.03590829 | 0.971355486 | NA |
| Gm11964   | 0.136516553 | 0.130869084 | 3.644536806 | 0.03590829 | 0.971355486 | NA |
| Gm11977   | 0.123120476 | 0.130869084 | 3.644536806 | 0.03590829 | 0.971355486 | NA |
| Gm12009   | 0.136516553 | 0.130869084 | 3.644536806 | 0.03590829 | 0.971355486 | NA |
| Gm12180   | 0.129307163 | 0.130869084 | 3.644536806 | 0.03590829 | 0.971355486 | NA |
| Gm12187   | 0.113127186 | 0.130869084 | 3.644536806 | 0.03590829 | 0.971355486 | NA |
| Gm12188   | 0.129307163 | 0.130869084 | 3.644536806 | 0.03590829 | 0.971355486 | NA |
| Gm12194   | 0.129307163 | 0.130869084 | 3.644536806 | 0.03590829 | 0.971355486 | NA |
| Gm12202   | 0.123120476 | 0.130869084 | 3.644536806 | 0.03590829 | 0.971355486 | NA |
| Gm12242   | 0.129307163 | 0.130869084 | 3.644536806 | 0.03590829 | 0.971355486 | NA |
| Gm12268   | 0.129307163 | 0.130869084 | 3.644536806 | 0.03590829 | 0.971355486 | NA |
| Gm12314   | 0.136516553 | 0.130869084 | 3.644536806 | 0.03590829 | 0.971355486 | NA |
| Gm12400   | 0.129307163 | 0.130869084 | 3.644536806 | 0.03590829 | 0.971355486 | NA |
| Gm12420   | 0.129307163 | 0.130869084 | 3.644536806 | 0.03590829 | 0.971355486 | NA |
| Gm12470   | 0.136516553 | 0.130869084 | 3.644536806 | 0.03590829 | 0.971355486 | NA |
| Gm12486   | 0.123120476 | 0.130869084 | 3.644536806 | 0.03590829 | 0.971355486 | NA |
| Gm12497   | 0.123120476 | 0.130869084 | 3.644536806 | 0.03590829 | 0.971355486 | NA |
| Gm12501   | 0.136516553 | 0.130869084 | 3.644536806 | 0.03590829 | 0.971355486 | NA |
| Gm12527   | 0.129307163 | 0.130869084 | 3.644536806 | 0.03590829 | 0.971355486 | NA |
| Gm12571   | 0.113127186 | 0.130869084 | 3.644536806 | 0.03590829 | 0.971355486 | NA |
| Gm12657   | 0.136516553 | 0.130869084 | 3.644536806 | 0.03590829 | 0.971355486 | NA |
| Gm12666   | 0.136516553 | 0.130869084 | 3.644536806 | 0.03590829 | 0.971355486 | NA |
| Gm12734   | 0.136516553 | 0.130869084 | 3.644536806 | 0.03590829 | 0.971355486 | NA |
| Gm12937   | 0.129307163 | 0.130869084 | 3.644536806 | 0.03590829 | 0.971355486 | NA |
| Gm12994   | 0.123120476 | 0.130869084 | 3.644536806 | 0.03590829 | 0.971355486 | NA |
| Gm13077   | 0.123120476 | 0.130869084 | 3.644536806 | 0.03590829 | 0.971355486 | NA |
| Gm13121   | 0.129307163 | 0.130869084 | 3.644536806 | 0.03590829 | 0.971355486 | NA |
| Gm13135   | 0.129307163 | 0.130869084 | 3.644536806 | 0.03590829 | 0.971355486 | NA |











|            |             |             |             |            |             |    |
|------------|-------------|-------------|-------------|------------|-------------|----|
| Gm8577     | 0.123120476 | 0.130869084 | 3.644536806 | 0.03590829 | 0.971355486 | NA |
| Gm8599     | 0.136516553 | 0.130869084 | 3.644536806 | 0.03590829 | 0.971355486 | NA |
| Gm8655     | 0.123120476 | 0.130869084 | 3.644536806 | 0.03590829 | 0.971355486 | NA |
| Gm8689     | 0.129307163 | 0.130869084 | 3.644536806 | 0.03590829 | 0.971355486 | NA |
| Gm8731     | 0.129307163 | 0.130869084 | 3.644536806 | 0.03590829 | 0.971355486 | NA |
| Gm8752     | 0.136516553 | 0.130869084 | 3.644536806 | 0.03590829 | 0.971355486 | NA |
| Gm8807     | 0.136516553 | 0.130869084 | 3.644536806 | 0.03590829 | 0.971355486 | NA |
| Gm8834     | 0.129307163 | 0.130869084 | 3.644536806 | 0.03590829 | 0.971355486 | NA |
| Gm8878     | 0.136516553 | 0.130869084 | 3.644536806 | 0.03590829 | 0.971355486 | NA |
| Gm8902     | 0.129307163 | 0.130869084 | 3.644536806 | 0.03590829 | 0.971355486 | NA |
| Gm8925     | 0.129307163 | 0.130869084 | 3.644536806 | 0.03590829 | 0.971355486 | NA |
| Gm8990     | 0.129307163 | 0.130869084 | 3.644536806 | 0.03590829 | 0.971355486 | NA |
| Gm9005     | 0.129307163 | 0.130869084 | 3.644536806 | 0.03590829 | 0.971355486 | NA |
| Gm9048     | 0.136516553 | 0.130869084 | 3.644536806 | 0.03590829 | 0.971355486 | NA |
| Gm9083     | 0.136516553 | 0.130869084 | 3.644536806 | 0.03590829 | 0.971355486 | NA |
| Gm9105     | 0.129307163 | 0.130869084 | 3.644536806 | 0.03590829 | 0.971355486 | NA |
| Gm9114     | 0.136516553 | 0.130869084 | 3.644536806 | 0.03590829 | 0.971355486 | NA |
| Gm9130     | 0.136516553 | 0.130869084 | 3.644536806 | 0.03590829 | 0.971355486 | NA |
| Gm9143     | 0.129307163 | 0.130869084 | 3.644536806 | 0.03590829 | 0.971355486 | NA |
| Gm9198     | 0.113127186 | 0.130869084 | 3.644536806 | 0.03590829 | 0.971355486 | NA |
| Gm9234     | 0.113127186 | 0.130869084 | 3.644536806 | 0.03590829 | 0.971355486 | NA |
| Gm9255     | 0.129307163 | 0.130869084 | 3.644536806 | 0.03590829 | 0.971355486 | NA |
| Gm9315     | 0.113127186 | 0.130869084 | 3.644536806 | 0.03590829 | 0.971355486 | NA |
| Gm9341     | 0.113127186 | 0.130869084 | 3.644536806 | 0.03590829 | 0.971355486 | NA |
| Gm9396     | 0.113127186 | 0.130869084 | 3.644536806 | 0.03590829 | 0.971355486 | NA |
| Gm9399     | 0.129307163 | 0.130869084 | 3.644536806 | 0.03590829 | 0.971355486 | NA |
| Gm9435     | 0.136516553 | 0.130869084 | 3.644536806 | 0.03590829 | 0.971355486 | NA |
| Gm9575     | 0.129307163 | 0.130869084 | 3.644536806 | 0.03590829 | 0.971355486 | NA |
| Gm9682     | 0.123120476 | 0.130869084 | 3.644536806 | 0.03590829 | 0.971355486 | NA |
| Gm9771     | 0.129307163 | 0.130869084 | 3.644536806 | 0.03590829 | 0.971355486 | NA |
| Gnat3      | 0.123120476 | 0.130869084 | 3.644536806 | 0.03590829 | 0.971355486 | NA |
| Gpr1       | 0.129307163 | 0.130869084 | 3.644536806 | 0.03590829 | 0.971355486 | NA |
| Gpx2-ps1   | 0.129307163 | 0.130869084 | 3.644536806 | 0.03590829 | 0.971355486 | NA |
| Griffin    | 0.136516553 | 0.130869084 | 3.644536806 | 0.03590829 | 0.971355486 | NA |
| Grp        | 0.129307163 | 0.130869084 | 3.644536806 | 0.03590829 | 0.971355486 | NA |
| H2ac21     | 0.113127186 | 0.130869084 | 3.644536806 | 0.03590829 | 0.971355486 | NA |
| H3f3a-ps2  | 0.129307163 | 0.130869084 | 3.644536806 | 0.03590829 | 0.971355486 | NA |
| Hfm1       | 0.136516553 | 0.130869084 | 3.644536806 | 0.03590829 | 0.971355486 | NA |
| Ifi202b    | 0.129307163 | 0.130869084 | 3.644536806 | 0.03590829 | 0.971355486 | NA |
| Ighv1-14   | 0.129307163 | 0.130869084 | 3.644536806 | 0.03590829 | 0.971355486 | NA |
| Ighv1-19-1 | 0.129307163 | 0.130869084 | 3.644536806 | 0.03590829 | 0.971355486 | NA |
| Ighv1-25   | 0.113127186 | 0.130869084 | 3.644536806 | 0.03590829 | 0.971355486 | NA |
| Ighv1-35   | 0.129307163 | 0.130869084 | 3.644536806 | 0.03590829 | 0.971355486 | NA |
| Ighv1-60   | 0.129307163 | 0.130869084 | 3.644536806 | 0.03590829 | 0.971355486 | NA |
| Ighv15-2   | 0.113127186 | 0.130869084 | 3.644536806 | 0.03590829 | 0.971355486 | NA |
| Igkv10-95  | 0.123120476 | 0.130869084 | 3.644536806 | 0.03590829 | 0.971355486 | NA |
| Igkv4-51   | 0.136516553 | 0.130869084 | 3.644536806 | 0.03590829 | 0.971355486 | NA |
| Il13       | 0.123120476 | 0.130869084 | 3.644536806 | 0.03590829 | 0.971355486 | NA |
| Il17a      | 0.123120476 | 0.130869084 | 3.644536806 | 0.03590829 | 0.971355486 | NA |
| Il20ra     | 0.136516553 | 0.130869084 | 3.644536806 | 0.03590829 | 0.971355486 | NA |
| Ins2       | 0.129307163 | 0.130869084 | 3.644536806 | 0.03590829 | 0.971355486 | NA |
| Insyn2a    | 0.123120476 | 0.130869084 | 3.644536806 | 0.03590829 | 0.971355486 | NA |
| Iqcf2      | 0.136516553 | 0.130869084 | 3.644536806 | 0.03590829 | 0.971355486 | NA |
| Irx2       | 0.136516553 | 0.130869084 | 3.644536806 | 0.03590829 | 0.971355486 | NA |
| Kat6b-ps1  | 0.136516553 | 0.130869084 | 3.644536806 | 0.03590829 | 0.971355486 | NA |
| Kcnj4      | 0.129307163 | 0.130869084 | 3.644536806 | 0.03590829 | 0.971355486 | NA |
| Kirrel2    | 0.129307163 | 0.130869084 | 3.644536806 | 0.03590829 | 0.971355486 | NA |
| Klk1b5     | 0.136516553 | 0.130869084 | 3.644536806 | 0.03590829 | 0.971355486 | NA |
| Klk1b7-ps  | 0.136516553 | 0.130869084 | 3.644536806 | 0.03590829 | 0.971355486 | NA |
| Klk1b9     | 0.123120476 | 0.130869084 | 3.644536806 | 0.03590829 | 0.971355486 | NA |
| Klrb1      | 0.136516553 | 0.130869084 | 3.644536806 | 0.03590829 | 0.971355486 | NA |
| Kncn       | 0.129307163 | 0.130869084 | 3.644536806 | 0.03590829 | 0.971355486 | NA |
| Krt25      | 0.129307163 | 0.130869084 | 3.644536806 | 0.03590829 | 0.971355486 | NA |
| Lactbl1    | 0.136516553 | 0.130869084 | 3.644536806 | 0.03590829 | 0.971355486 | NA |
| Lao1       | 0.129307163 | 0.130869084 | 3.644536806 | 0.03590829 | 0.971355486 | NA |
| Lce1f      | 0.129307163 | 0.130869084 | 3.644536806 | 0.03590829 | 0.971355486 | NA |



|             |             |             |             |            |             |    |
|-------------|-------------|-------------|-------------|------------|-------------|----|
| Lcn10       | 0.123120476 | 0.130869084 | 3.644536806 | 0.03590829 | 0.971355486 | NA |
| Ldha-ps2    | 0.136516553 | 0.130869084 | 3.644536806 | 0.03590829 | 0.971355486 | NA |
| Lgals1-ps2  | 0.136516553 | 0.130869084 | 3.644536806 | 0.03590829 | 0.971355486 | NA |
| Lmntd1      | 0.129307163 | 0.130869084 | 3.644536806 | 0.03590829 | 0.971355486 | NA |
| LO018689.6  | 0.123120476 | 0.130869084 | 3.644536806 | 0.03590829 | 0.971355486 | NA |
| Lrcol1      | 0.129307163 | 0.130869084 | 3.644536806 | 0.03590829 | 0.971355486 | NA |
| LT629149.5  | 0.136516553 | 0.130869084 | 3.644536806 | 0.03590829 | 0.971355486 | NA |
| Mageb16-ps2 | 0.129307163 | 0.130869084 | 3.644536806 | 0.03590829 | 0.971355486 | NA |
| Mbd3l2      | 0.136516553 | 0.130869084 | 3.644536806 | 0.03590829 | 0.971355486 | NA |
| Mcpt8       | 0.113127186 | 0.130869084 | 3.644536806 | 0.03590829 | 0.971355486 | NA |
| Meioc       | 0.129307163 | 0.130869084 | 3.644536806 | 0.03590829 | 0.971355486 | NA |
| Mip         | 0.123120476 | 0.130869084 | 3.644536806 | 0.03590829 | 0.971355486 | NA |
| Ms4a10      | 0.113127186 | 0.130869084 | 3.644536806 | 0.03590829 | 0.971355486 | NA |
| Ms4a15      | 0.129307163 | 0.130869084 | 3.644536806 | 0.03590829 | 0.971355486 | NA |
| Myoc        | 0.113127186 | 0.130869084 | 3.644536806 | 0.03590829 | 0.971355486 | NA |
| Myoz1       | 0.136516553 | 0.130869084 | 3.644536806 | 0.03590829 | 0.971355486 | NA |
| Myoz3       | 0.123120476 | 0.130869084 | 3.644536806 | 0.03590829 | 0.971355486 | NA |
| Neurod1     | 0.113127186 | 0.130869084 | 3.644536806 | 0.03590829 | 0.971355486 | NA |
| Nhlh1       | 0.113127186 | 0.130869084 | 3.644536806 | 0.03590829 | 0.971355486 | NA |
| Nkx3-2      | 0.129307163 | 0.130869084 | 3.644536806 | 0.03590829 | 0.971355486 | NA |
| Nlk-ps1     | 0.113127186 | 0.130869084 | 3.644536806 | 0.03590829 | 0.971355486 | NA |
| Nox1        | 0.129307163 | 0.130869084 | 3.644536806 | 0.03590829 | 0.971355486 | NA |
| Nr2e3       | 0.113127186 | 0.130869084 | 3.644536806 | 0.03590829 | 0.971355486 | NA |
| Nrg3        | 0.136516553 | 0.130869084 | 3.644536806 | 0.03590829 | 0.971355486 | NA |
| Nt5c1a      | 0.136516553 | 0.130869084 | 3.644536806 | 0.03590829 | 0.971355486 | NA |
| Oat-rs1     | 0.113127186 | 0.130869084 | 3.644536806 | 0.03590829 | 0.971355486 | NA |
| Obox4-ps23  | 0.136817285 | 0.130869084 | 3.644536806 | 0.03590829 | 0.971355486 | NA |
| Ofcc1       | 0.136516553 | 0.130869084 | 3.644536806 | 0.03590829 | 0.971355486 | NA |
| Olfr10      | 0.136516553 | 0.130869084 | 3.644536806 | 0.03590829 | 0.971355486 | NA |
| Olfr1135    | 0.136516553 | 0.130869084 | 3.644536806 | 0.03590829 | 0.971355486 | NA |
| Olfr1197    | 0.129307163 | 0.130869084 | 3.644536806 | 0.03590829 | 0.971355486 | NA |
| Olfr1211    | 0.129307163 | 0.130869084 | 3.644536806 | 0.03590829 | 0.971355486 | NA |
| Olfr128     | 0.113127186 | 0.130869084 | 3.644536806 | 0.03590829 | 0.971355486 | NA |
| Olfr1359    | 0.129307163 | 0.130869084 | 3.644536806 | 0.03590829 | 0.971355486 | NA |
| Olfr1501    | 0.129307163 | 0.130869084 | 3.644536806 | 0.03590829 | 0.971355486 | NA |
| Olfr189-ps1 | 0.129307163 | 0.130869084 | 3.644536806 | 0.03590829 | 0.971355486 | NA |
| Olfr195     | 0.113127186 | 0.130869084 | 3.644536806 | 0.03590829 | 0.971355486 | NA |
| Olfr213     | 0.123120476 | 0.130869084 | 3.644536806 | 0.03590829 | 0.971355486 | NA |
| Olfr308     | 0.129307163 | 0.130869084 | 3.644536806 | 0.03590829 | 0.971355486 | NA |
| Olfr364-ps1 | 0.136516553 | 0.130869084 | 3.644536806 | 0.03590829 | 0.971355486 | NA |
| Olfr384     | 0.129307163 | 0.130869084 | 3.644536806 | 0.03590829 | 0.971355486 | NA |
| Olfr753-ps1 | 0.129307163 | 0.130869084 | 3.644536806 | 0.03590829 | 0.971355486 | NA |
| Olfr763     | 0.136516553 | 0.130869084 | 3.644536806 | 0.03590829 | 0.971355486 | NA |
| Olfr847     | 0.113127186 | 0.130869084 | 3.644536806 | 0.03590829 | 0.971355486 | NA |
| Olfr881     | 0.129307163 | 0.130869084 | 3.644536806 | 0.03590829 | 0.971355486 | NA |
| Olfr983     | 0.129307163 | 0.130869084 | 3.644536806 | 0.03590829 | 0.971355486 | NA |
| Pga5        | 0.113127186 | 0.130869084 | 3.644536806 | 0.03590829 | 0.971355486 | NA |
| Pgk1-rs7    | 0.113222908 | 0.130869084 | 3.644536806 | 0.03590829 | 0.971355486 | NA |
| Pgk2        | 0.123120476 | 0.130869084 | 3.644536806 | 0.03590829 | 0.971355486 | NA |
| Phf11       | 0.123120476 | 0.130869084 | 3.644536806 | 0.03590829 | 0.971355486 | NA |
| Phgdh-ps1   | 0.129307163 | 0.130869084 | 3.644536806 | 0.03590829 | 0.971355486 | NA |
| Pla2g2e     | 0.129307163 | 0.130869084 | 3.644536806 | 0.03590829 | 0.971355486 | NA |
| Plaat1      | 0.129307163 | 0.130869084 | 3.644536806 | 0.03590829 | 0.971355486 | NA |
| Plac1       | 0.129307163 | 0.130869084 | 3.644536806 | 0.03590829 | 0.971355486 | NA |
| Pmfbp1      | 0.136516553 | 0.130869084 | 3.644536806 | 0.03590829 | 0.971355486 | NA |
| Pnma5       | 0.129307163 | 0.130869084 | 3.644536806 | 0.03590829 | 0.971355486 | NA |
| Pnmt        | 0.129307163 | 0.130869084 | 3.644536806 | 0.03590829 | 0.971355486 | NA |
| Potegl      | 0.129307163 | 0.130869084 | 3.644536806 | 0.03590829 | 0.971355486 | NA |
| Ppp1r14bl   | 0.129307163 | 0.130869084 | 3.644536806 | 0.03590829 | 0.971355486 | NA |
| Prima1      | 0.129307163 | 0.130869084 | 3.644536806 | 0.03590829 | 0.971355486 | NA |
| Prl7a2      | 0.136516553 | 0.130869084 | 3.644536806 | 0.03590829 | 0.971355486 | NA |
| Prss27      | 0.113127186 | 0.130869084 | 3.644536806 | 0.03590829 | 0.971355486 | NA |
| Ptgrd2      | 0.136516553 | 0.130869084 | 3.644536806 | 0.03590829 | 0.971355486 | NA |
| Qrfprl      | 0.136516553 | 0.130869084 | 3.644536806 | 0.03590829 | 0.971355486 | NA |
| Rag1        | 0.136516553 | 0.130869084 | 3.644536806 | 0.03590829 | 0.971355486 | NA |
| Raly1       | 0.113127186 | 0.130869084 | 3.644536806 | 0.03590829 | 0.971355486 | NA |

|              |             |             |             |            |             |    |
|--------------|-------------|-------------|-------------|------------|-------------|----|
| Rbmx2-ps     | 0.113127186 | 0.130869084 | 3.644536806 | 0.03590829 | 0.971355486 | NA |
| Rbpj-ps1     | 0.123120476 | 0.130869084 | 3.644536806 | 0.03590829 | 0.971355486 | NA |
| Rbpjl        | 0.129307163 | 0.130869084 | 3.644536806 | 0.03590829 | 0.971355486 | NA |
| Rhox4c       | 0.129307163 | 0.130869084 | 3.644536806 | 0.03590829 | 0.971355486 | NA |
| Rhox9        | 0.129307163 | 0.130869084 | 3.644536806 | 0.03590829 | 0.971355486 | NA |
| Ropn1        | 0.113127186 | 0.130869084 | 3.644536806 | 0.03590829 | 0.971355486 | NA |
| Rpl10-ps2    | 0.136516553 | 0.130869084 | 3.644536806 | 0.03590829 | 0.971355486 | NA |
| Rpl13-ps3    | 0.123120476 | 0.130869084 | 3.644536806 | 0.03590829 | 0.971355486 | NA |
| Rpl18-ps1    | 0.129307163 | 0.130869084 | 3.644536806 | 0.03590829 | 0.971355486 | NA |
| Rpl21-ps11   | 0.136516553 | 0.130869084 | 3.644536806 | 0.03590829 | 0.971355486 | NA |
| Rpl21-ps7    | 0.129307163 | 0.130869084 | 3.644536806 | 0.03590829 | 0.971355486 | NA |
| Rpl26-ps2    | 0.136516553 | 0.130869084 | 3.644536806 | 0.03590829 | 0.971355486 | NA |
| Rpl27a-ps2   | 0.129307163 | 0.130869084 | 3.644536806 | 0.03590829 | 0.971355486 | NA |
| Rpl30-ps11   | 0.113127186 | 0.130869084 | 3.644536806 | 0.03590829 | 0.971355486 | NA |
| Rpl30-ps2    | 0.136516553 | 0.130869084 | 3.644536806 | 0.03590829 | 0.971355486 | NA |
| Rpl31-ps2    | 0.129307163 | 0.130869084 | 3.644536806 | 0.03590829 | 0.971355486 | NA |
| Rps13-ps6    | 0.129307163 | 0.130869084 | 3.644536806 | 0.03590829 | 0.971355486 | NA |
| Rps19-ps13   | 0.129307163 | 0.130869084 | 3.644536806 | 0.03590829 | 0.971355486 | NA |
| Rps19-ps5    | 0.113127186 | 0.130869084 | 3.644536806 | 0.03590829 | 0.971355486 | NA |
| Rps7-ps2     | 0.129307163 | 0.130869084 | 3.644536806 | 0.03590829 | 0.971355486 | NA |
| Rpsa-ps12    | 0.123120476 | 0.130869084 | 3.644536806 | 0.03590829 | 0.971355486 | NA |
| Rspo2        | 0.129307163 | 0.130869084 | 3.644536806 | 0.03590829 | 0.971355486 | NA |
| Rxfp3        | 0.136516553 | 0.130869084 | 3.644536806 | 0.03590829 | 0.971355486 | NA |
| S100a5       | 0.123120476 | 0.130869084 | 3.644536806 | 0.03590829 | 0.971355486 | NA |
| Scp2-ps1     | 0.113127186 | 0.130869084 | 3.644536806 | 0.03590829 | 0.971355486 | NA |
| Serpina16    | 0.113127186 | 0.130869084 | 3.644536806 | 0.03590829 | 0.971355486 | NA |
| Serpina3b    | 0.136516553 | 0.130869084 | 3.644536806 | 0.03590829 | 0.971355486 | NA |
| Serpinb5     | 0.123120476 | 0.130869084 | 3.644536806 | 0.03590829 | 0.971355486 | NA |
| Ska2l-ps     | 0.129307163 | 0.130869084 | 3.644536806 | 0.03590829 | 0.971355486 | NA |
| Slc45a2      | 0.129307163 | 0.130869084 | 3.644536806 | 0.03590829 | 0.971355486 | NA |
| Slc7a10      | 0.129307163 | 0.130869084 | 3.644536806 | 0.03590829 | 0.971355486 | NA |
| Slco6b1      | 0.129307163 | 0.130869084 | 3.644536806 | 0.03590829 | 0.971355486 | NA |
| Smco3        | 0.123120476 | 0.130869084 | 3.644536806 | 0.03590829 | 0.971355486 | NA |
| Sncb         | 0.136516553 | 0.130869084 | 3.644536806 | 0.03590829 | 0.971355486 | NA |
| Snrpert      | 0.136516553 | 0.130869084 | 3.644536806 | 0.03590829 | 0.971355486 | NA |
| Sox30        | 0.129307163 | 0.130869084 | 3.644536806 | 0.03590829 | 0.971355486 | NA |
| Speer2       | 0.129307163 | 0.130869084 | 3.644536806 | 0.03590829 | 0.971355486 | NA |
| Spink2       | 0.113127186 | 0.130869084 | 3.644536806 | 0.03590829 | 0.971355486 | NA |
| Spint3       | 0.129307163 | 0.130869084 | 3.644536806 | 0.03590829 | 0.971355486 | NA |
| Ssxb2        | 0.129307163 | 0.130869084 | 3.644536806 | 0.03590829 | 0.971355486 | NA |
| Stpg2        | 0.129307163 | 0.130869084 | 3.644536806 | 0.03590829 | 0.971355486 | NA |
| Stra8        | 0.136516553 | 0.130869084 | 3.644536806 | 0.03590829 | 0.971355486 | NA |
| Syna         | 0.129307163 | 0.130869084 | 3.644536806 | 0.03590829 | 0.971355486 | NA |
| Tac1         | 0.136516553 | 0.130869084 | 3.644536806 | 0.03590829 | 0.971355486 | NA |
| Taf7l2       | 0.129307163 | 0.130869084 | 3.644536806 | 0.03590829 | 0.971355486 | NA |
| Tas2r141-ps4 | 0.113127186 | 0.130869084 | 3.644536806 | 0.03590829 | 0.971355486 | NA |
| Tcp11x2      | 0.136516553 | 0.130869084 | 3.644536806 | 0.03590829 | 0.971355486 | NA |
| Tex11        | 0.136516553 | 0.130869084 | 3.644536806 | 0.03590829 | 0.971355486 | NA |
| Tex22        | 0.113127186 | 0.130869084 | 3.644536806 | 0.03590829 | 0.971355486 | NA |
| Tex43        | 0.129307163 | 0.130869084 | 3.644536806 | 0.03590829 | 0.971355486 | NA |
| Tmco2        | 0.129307163 | 0.130869084 | 3.644536806 | 0.03590829 | 0.971355486 | NA |
| Tmem181c-ps  | 0.129307163 | 0.130869084 | 3.644536806 | 0.03590829 | 0.971355486 | NA |
| Tmigd3       | 0.129307163 | 0.130869084 | 3.644536806 | 0.03590829 | 0.971355486 | NA |
| Tmprss12     | 0.136516553 | 0.130869084 | 3.644536806 | 0.03590829 | 0.971355486 | NA |
| Tpd52-ps     | 0.136516553 | 0.130869084 | 3.644536806 | 0.03590829 | 0.971355486 | NA |
| Traj15       | 0.123120476 | 0.130869084 | 3.644536806 | 0.03590829 | 0.971355486 | NA |
| Traj19       | 0.129307163 | 0.130869084 | 3.644536806 | 0.03590829 | 0.971355486 | NA |
| Traj2        | 0.129307163 | 0.130869084 | 3.644536806 | 0.03590829 | 0.971355486 | NA |
| Trav11d      | 0.113127186 | 0.130869084 | 3.644536806 | 0.03590829 | 0.971355486 | NA |
| Trav15n-3    | 0.129307163 | 0.130869084 | 3.644536806 | 0.03590829 | 0.971355486 | NA |
| Trav16       | 0.136516553 | 0.130869084 | 3.644536806 | 0.03590829 | 0.971355486 | NA |
| Trav4-3      | 0.129307163 | 0.130869084 | 3.644536806 | 0.03590829 | 0.971355486 | NA |
| Trav4-4-dv10 | 0.136516553 | 0.130869084 | 3.644536806 | 0.03590829 | 0.971355486 | NA |
| Trav6d-3     | 0.136516553 | 0.130869084 | 3.644536806 | 0.03590829 | 0.971355486 | NA |
| Trav7d-6     | 0.136516553 | 0.130869084 | 3.644536806 | 0.03590829 | 0.971355486 | NA |
| Trav8-1      | 0.136516553 | 0.130869084 | 3.644536806 | 0.03590829 | 0.971355486 | NA |

|               |             |             |             |            |             |    |
|---------------|-------------|-------------|-------------|------------|-------------|----|
| Trav8-2       | 0.113127186 | 0.130869084 | 3.644536806 | 0.03590829 | 0.971355486 | NA |
| Trav9-4       | 0.129307163 | 0.130869084 | 3.644536806 | 0.03590829 | 0.971355486 | NA |
| Trbj1-7       | 0.136516553 | 0.130869084 | 3.644536806 | 0.03590829 | 0.971355486 | NA |
| Trbj2-2       | 0.136516553 | 0.130869084 | 3.644536806 | 0.03590829 | 0.971355486 | NA |
| Trbv14        | 0.113127186 | 0.130869084 | 3.644536806 | 0.03590829 | 0.971355486 | NA |
| Trbv31        | 0.136516553 | 0.130869084 | 3.644536806 | 0.03590829 | 0.971355486 | NA |
| Trdj2         | 0.136516553 | 0.130869084 | 3.644536806 | 0.03590829 | 0.971355486 | NA |
| Trgj2         | 0.136516553 | 0.130869084 | 3.644536806 | 0.03590829 | 0.971355486 | NA |
| Txndc2        | 0.129307163 | 0.130869084 | 3.644536806 | 0.03590829 | 0.971355486 | NA |
| Ucp1          | 0.136516553 | 0.130869084 | 3.644536806 | 0.03590829 | 0.971355486 | NA |
| Uts2          | 0.136516553 | 0.130869084 | 3.644536806 | 0.03590829 | 0.971355486 | NA |
| Vamp9         | 0.136516553 | 0.130869084 | 3.644536806 | 0.03590829 | 0.971355486 | NA |
| Vgf           | 0.129307163 | 0.130869084 | 3.644536806 | 0.03590829 | 0.971355486 | NA |
| Vmn1r-ps73    | 0.113127186 | 0.130869084 | 3.644536806 | 0.03590829 | 0.971355486 | NA |
| Vmn1r219      | 0.129307163 | 0.130869084 | 3.644536806 | 0.03590829 | 0.971355486 | NA |
| Vmn1r3        | 0.136516553 | 0.130869084 | 3.644536806 | 0.03590829 | 0.971355486 | NA |
| Vmn1r33       | 0.113127186 | 0.130869084 | 3.644536806 | 0.03590829 | 0.971355486 | NA |
| Vmn1r54       | 0.123120476 | 0.130869084 | 3.644536806 | 0.03590829 | 0.971355486 | NA |
| Vmn1r67       | 0.136516553 | 0.130869084 | 3.644536806 | 0.03590829 | 0.971355486 | NA |
| Vmn2r-ps102   | 0.136516553 | 0.130869084 | 3.644536806 | 0.03590829 | 0.971355486 | NA |
| Vmn2r18       | 0.129307163 | 0.130869084 | 3.644536806 | 0.03590829 | 0.971355486 | NA |
| Vmn2r26       | 0.113127186 | 0.130869084 | 3.644536806 | 0.03590829 | 0.971355486 | NA |
| Vmn2r34       | 0.136516553 | 0.130869084 | 3.644536806 | 0.03590829 | 0.971355486 | NA |
| Vmn2r6        | 0.136516553 | 0.130869084 | 3.644536806 | 0.03590829 | 0.971355486 | NA |
| Vmn2r96       | 0.123120476 | 0.130869084 | 3.644536806 | 0.03590829 | 0.971355486 | NA |
| Vwa2          | 0.129307163 | 0.130869084 | 3.644536806 | 0.03590829 | 0.971355486 | NA |
| Wdr64         | 0.136516553 | 0.130869084 | 3.644536806 | 0.03590829 | 0.971355486 | NA |
| Wnt3a         | 0.129307163 | 0.130869084 | 3.644536806 | 0.03590829 | 0.971355486 | NA |
| Xlr5c         | 0.136516553 | 0.130869084 | 3.644536806 | 0.03590829 | 0.971355486 | NA |
| Ywhaq-ps2     | 0.129307163 | 0.130869084 | 3.644536806 | 0.03590829 | 0.971355486 | NA |
| Zfp148-ps1    | 0.136516553 | 0.130869084 | 3.644536806 | 0.03590829 | 0.971355486 | NA |
| Zp1           | 0.129307163 | 0.130869084 | 3.644536806 | 0.03590829 | 0.971355486 | NA |
| 1700018B08Rik | 0.113127186 | 0.130869084 | 3.644536806 | 0.03590829 | 0.971355486 | NA |
| 2310057118Rik | 0.123120476 | 0.130869084 | 3.644536806 | 0.03590829 | 0.971355486 | NA |
| 6330409D20Rik | 0.113127186 | 0.130869084 | 3.644536806 | 0.03590829 | 0.971355486 | NA |
| AC147512.1    | 0.113127186 | 0.130869084 | 3.644536806 | 0.03590829 | 0.971355486 | NA |
| Acsbg2        | 0.113127186 | 0.130869084 | 3.644536806 | 0.03590829 | 0.971355486 | NA |
| Ankrd34b      | 0.123120476 | 0.130869084 | 3.644536806 | 0.03590829 | 0.971355486 | NA |
| Atf1-ps       | 0.113127186 | 0.130869084 | 3.644536806 | 0.03590829 | 0.971355486 | NA |
| BC048507      | 0.113127186 | 0.130869084 | 3.644536806 | 0.03590829 | 0.971355486 | NA |
| BC048679      | 0.113127186 | 0.130869084 | 3.644536806 | 0.03590829 | 0.971355486 | NA |
| Bcl2l10       | 0.113127186 | 0.130869084 | 3.644536806 | 0.03590829 | 0.971355486 | NA |
| Btnl4         | 0.113127186 | 0.130869084 | 3.644536806 | 0.03590829 | 0.971355486 | NA |
| Cdc34b        | 0.113127186 | 0.130869084 | 3.644536806 | 0.03590829 | 0.971355486 | NA |
| Cdcp2         | 0.113127186 | 0.130869084 | 3.644536806 | 0.03590829 | 0.971355486 | NA |
| Cfap99        | 0.113127186 | 0.130869084 | 3.644536806 | 0.03590829 | 0.971355486 | NA |
| Chil4         | 0.113127186 | 0.130869084 | 3.644536806 | 0.03590829 | 0.971355486 | NA |
| Cstdc6        | 0.113127186 | 0.130869084 | 3.644536806 | 0.03590829 | 0.971355486 | NA |
| Ctsg          | 0.113127186 | 0.130869084 | 3.644536806 | 0.03590829 | 0.971355486 | NA |
| Dcc           | 0.113127186 | 0.130869084 | 3.644536806 | 0.03590829 | 0.971355486 | NA |
| Defa42        | 0.113127186 | 0.130869084 | 3.644536806 | 0.03590829 | 0.971355486 | NA |
| Fbxw26        | 0.113127186 | 0.130869084 | 3.644536806 | 0.03590829 | 0.971355486 | NA |
| Flg           | 0.113127186 | 0.130869084 | 3.644536806 | 0.03590829 | 0.971355486 | NA |
| Fmo6          | 0.113127186 | 0.130869084 | 3.644536806 | 0.03590829 | 0.971355486 | NA |
| Fscn2         | 0.113127186 | 0.130869084 | 3.644536806 | 0.03590829 | 0.971355486 | NA |
| Fxyd4         | 0.113127186 | 0.130869084 | 3.644536806 | 0.03590829 | 0.971355486 | NA |
| Glud-ps       | 0.113127186 | 0.130869084 | 3.644536806 | 0.03590829 | 0.971355486 | NA |
| Gm10126       | 0.113127186 | 0.130869084 | 3.644536806 | 0.03590829 | 0.971355486 | NA |
| Gm10237       | 0.113127186 | 0.130869084 | 3.644536806 | 0.03590829 | 0.971355486 | NA |
| Gm11191       | 0.123120476 | 0.130869084 | 3.644536806 | 0.03590829 | 0.971355486 | NA |
| Gm11445       | 0.123120476 | 0.130869084 | 3.644536806 | 0.03590829 | 0.971355486 | NA |
| Gm11543       | 0.113127186 | 0.130869084 | 3.644536806 | 0.03590829 | 0.971355486 | NA |
| Gm11790       | 0.113127186 | 0.130869084 | 3.644536806 | 0.03590829 | 0.971355486 | NA |
| Gm11868       | 0.113127186 | 0.130869084 | 3.644536806 | 0.03590829 | 0.971355486 | NA |
| Gm12042       | 0.113127186 | 0.130869084 | 3.644536806 | 0.03590829 | 0.971355486 | NA |
| Gm12104       | 0.113127186 | 0.130869084 | 3.644536806 | 0.03590829 | 0.971355486 | NA |



|             |             |             |             |             |             |    |
|-------------|-------------|-------------|-------------|-------------|-------------|----|
| Gm48459     | 0.113127186 | 0.130869084 | 3.644536806 | 0.03590829  | 0.971355486 | NA |
| Gm49095     | 0.113127186 | 0.130869084 | 3.644536806 | 0.03590829  | 0.971355486 | NA |
| Gm49389     | 0.123120476 | 0.130869084 | 3.644536806 | 0.03590829  | 0.971355486 | NA |
| Gm49459     | 0.113127186 | 0.130869084 | 3.644536806 | 0.03590829  | 0.971355486 | NA |
| Gm4963      | 0.113127186 | 0.130869084 | 3.644536806 | 0.03590829  | 0.971355486 | NA |
| Gm4981      | 0.113127186 | 0.130869084 | 3.644536806 | 0.03590829  | 0.971355486 | NA |
| Gm5436      | 0.113127186 | 0.130869084 | 3.644536806 | 0.03590829  | 0.971355486 | NA |
| Gm5528      | 0.113127186 | 0.130869084 | 3.644536806 | 0.03590829  | 0.971355486 | NA |
| Gm5541      | 0.113127186 | 0.130869084 | 3.644536806 | 0.03590829  | 0.971355486 | NA |
| Gm5801      | 0.113127186 | 0.130869084 | 3.644536806 | 0.03590829  | 0.971355486 | NA |
| Gm6263      | 0.113127186 | 0.130869084 | 3.644536806 | 0.03590829  | 0.971355486 | NA |
| Gm6305      | 0.113127186 | 0.130869084 | 3.644536806 | 0.03590829  | 0.971355486 | NA |
| Gm648       | 0.113127186 | 0.130869084 | 3.644536806 | 0.03590829  | 0.971355486 | NA |
| Gm6564      | 0.123120476 | 0.130869084 | 3.644536806 | 0.03590829  | 0.971355486 | NA |
| Gm7493      | 0.123120476 | 0.130869084 | 3.644536806 | 0.03590829  | 0.971355486 | NA |
| Gm7664      | 0.113127186 | 0.130869084 | 3.644536806 | 0.03590829  | 0.971355486 | NA |
| Gm8288      | 0.113127186 | 0.130869084 | 3.644536806 | 0.03590829  | 0.971355486 | NA |
| Gm8407      | 0.113127186 | 0.130869084 | 3.644536806 | 0.03590829  | 0.971355486 | NA |
| Gm8498      | 0.113127186 | 0.130869084 | 3.644536806 | 0.03590829  | 0.971355486 | NA |
| Gm8724      | 0.123120476 | 0.130869084 | 3.644536806 | 0.03590829  | 0.971355486 | NA |
| Gm8969      | 0.113127186 | 0.130869084 | 3.644536806 | 0.03590829  | 0.971355486 | NA |
| Gm9008      | 0.113127186 | 0.130869084 | 3.644536806 | 0.03590829  | 0.971355486 | NA |
| Gm9081      | 0.113127186 | 0.130869084 | 3.644536806 | 0.03590829  | 0.971355486 | NA |
| Gm9361      | 0.113127186 | 0.130869084 | 3.644536806 | 0.03590829  | 0.971355486 | NA |
| Gm9431      | 0.113127186 | 0.130869084 | 3.644536806 | 0.03590829  | 0.971355486 | NA |
| Gm9747      | 0.123120476 | 0.130869084 | 3.644536806 | 0.03590829  | 0.971355486 | NA |
| Gm9987      | 0.113127186 | 0.130869084 | 3.644536806 | 0.03590829  | 0.971355486 | NA |
| Gm9999      | 0.113127186 | 0.130869084 | 3.644536806 | 0.03590829  | 0.971355486 | NA |
| Gml2        | 0.113127186 | 0.130869084 | 3.644536806 | 0.03590829  | 0.971355486 | NA |
| Gprin1      | 0.113127186 | 0.130869084 | 3.644536806 | 0.03590829  | 0.971355486 | NA |
| Grem1       | 0.123120476 | 0.130869084 | 3.644536806 | 0.03590829  | 0.971355486 | NA |
| Grm6        | 0.123120476 | 0.130869084 | 3.644536806 | 0.03590829  | 0.971355486 | NA |
| Gtsf1       | 0.123120476 | 0.130869084 | 3.644536806 | 0.03590829  | 0.971355486 | NA |
| Gzmf        | 0.113127186 | 0.130869084 | 3.644536806 | 0.03590829  | 0.971355486 | NA |
| Hpse2       | 0.113127186 | 0.130869084 | 3.644536806 | 0.03590829  | 0.971355486 | NA |
| Khdc1b      | 0.113127186 | 0.130869084 | 3.644536806 | 0.03590829  | 0.971355486 | NA |
| LT629151.2  | 0.113127186 | 0.130869084 | 3.644536806 | 0.03590829  | 0.971355486 | NA |
| Mettl21e    | 0.113127186 | 0.130869084 | 3.644536806 | 0.03590829  | 0.971355486 | NA |
| Nlrp2       | 0.113127186 | 0.130869084 | 3.644536806 | 0.03590829  | 0.971355486 | NA |
| Nppb        | 0.113127186 | 0.130869084 | 3.644536806 | 0.03590829  | 0.971355486 | NA |
| Nr1h2-ps    | 0.113127186 | 0.130869084 | 3.644536806 | 0.03590829  | 0.971355486 | NA |
| Oas1h       | 0.113127186 | 0.130869084 | 3.644536806 | 0.03590829  | 0.971355486 | NA |
| Olfr1404    | 0.113127186 | 0.130869084 | 3.644536806 | 0.03590829  | 0.971355486 | NA |
| Olfr602-ps1 | 0.113127186 | 0.130869084 | 3.644536806 | 0.03590829  | 0.971355486 | NA |
| Olfr878     | 0.113127186 | 0.130869084 | 3.644536806 | 0.03590829  | 0.971355486 | NA |
| Oog1        | 0.113127186 | 0.130869084 | 3.644536806 | 0.03590829  | 0.971355486 | NA |
| Otol1       | 0.113127186 | 0.130869084 | 3.644536806 | 0.03590829  | 0.971355486 | NA |
| Pramel5     | 0.123120476 | 0.130869084 | 3.644536806 | 0.03590829  | 0.971355486 | NA |
| Rpl23a-ps13 | 0.113127186 | 0.130869084 | 3.644536806 | 0.03590829  | 0.971355486 | NA |
| Rpl31-ps20  | 0.123120476 | 0.130869084 | 3.644536806 | 0.03590829  | 0.971355486 | NA |
| Rsph6a      | 0.113127186 | 0.130869084 | 3.644536806 | 0.03590829  | 0.971355486 | NA |
| Rybp-ps     | 0.113127186 | 0.130869084 | 3.644536806 | 0.03590829  | 0.971355486 | NA |
| Serpini2    | 0.113127186 | 0.130869084 | 3.644536806 | 0.03590829  | 0.971355486 | NA |
| Slc2a7      | 0.113127186 | 0.130869084 | 3.644536806 | 0.03590829  | 0.971355486 | NA |
| Slc30a2     | 0.113127186 | 0.130869084 | 3.644536806 | 0.03590829  | 0.971355486 | NA |
| Snappc1l    | 0.113127186 | 0.130869084 | 3.644536806 | 0.03590829  | 0.971355486 | NA |
| Spata32     | 0.113127186 | 0.130869084 | 3.644536806 | 0.03590829  | 0.971355486 | NA |
| Tmem207     | 0.113127186 | 0.130869084 | 3.644536806 | 0.03590829  | 0.971355486 | NA |
| Traj22      | 0.113127186 | 0.130869084 | 3.644536806 | 0.03590829  | 0.971355486 | NA |
| Trav6d-4    | 0.113127186 | 0.130869084 | 3.644536806 | 0.03590829  | 0.971355486 | NA |
| Zfp978      | 0.136369797 | 0.130869084 | 3.644536806 | 0.03590829  | 0.971355486 | NA |
| Hipk1       | 1157.119773 | 0.130856251 | 0.186164459 | 0.702906729 | 0.482113878 |    |
| Gm12626     | 0.129497516 | 0.130428252 | 3.644503228 | 0.035787663 | 0.971451671 | NA |
| Gm10243     | 0.44630531  | 0.130260204 | 2.68276711  | 0.048554421 | 0.961274394 | NA |
| Rpl35a-ps2  | 0.44630531  | 0.130260204 | 2.68276711  | 0.048554421 | 0.961274394 | NA |
| Rpl35a-ps3  | 0.44630531  | 0.130260204 | 2.68276711  | 0.048554421 | 0.961274394 | NA |



|               |             |             |             |             |             |    |             |
|---------------|-------------|-------------|-------------|-------------|-------------|----|-------------|
| Rpl35a-ps4    | 0.44630531  | 0.130260204 | 2.68276711  | 0.048554421 | 0.961274394 | NA |             |
| Rpl35a-ps6    | 0.44630531  | 0.130260204 | 2.68276711  | 0.048554421 | 0.961274394 | NA |             |
| Gm14791       | 0.136820047 | 0.130203558 | 3.644486135 | 0.035726177 | 0.971500697 | NA |             |
| Klhl20        | 261.7536871 | 0.130080392 | 0.18674259  | 0.696575924 | 0.486068227 |    | 0.57633128  |
| Zdhc7         | 264.4703187 | 0.129961655 | 0.175187951 | 0.741841286 | 0.458183503 |    | 0.548784767 |
| Gm27149       | 0.113496591 | 0.12989196  | 3.644462453 | 0.035640911 | 0.971568687 | NA |             |
| Senp6         | 1051.467181 | 0.1298367   | 0.183766091 | 0.706532417 | 0.4798571   |    | 0.570116652 |
| BC080696      | 0.13659082  | 0.129766141 | 3.644452898 | 0.03560648  | 0.971596141 | NA |             |
| Tmem1311      | 542.0680643 | 0.129725788 | 0.278027346 | 0.466593627 | 0.640790647 |    | 0.717894392 |
| Blk           | 4.408063317 | 0.129572848 | 1.177783275 | 0.110014169 | 0.912398138 |    | 0.935500298 |
| Bloc1s4       | 172.2178039 | 0.129279209 | 0.204086312 | 0.633453601 | 0.526437472 |    | 0.614579608 |
| Pagr1a        | 40.31595113 | 0.129268858 | 0.723233613 | 0.178737348 | 0.858143942 |    | 0.894833808 |
| Gm7269        | 0.509506149 | 0.129184403 | 2.98127285  | 0.043331962 | 0.965436913 | NA |             |
| Entpd4        | 644.2828068 | 0.129147103 | 0.212093594 | 0.608915621 | 0.54258037  |    | 0.629285328 |
| Olfr906       | 4.540767788 | 0.128836593 | 0.857070553 | 0.150322039 | 0.880510546 |    | 0.912242102 |
| Ubl3          | 886.710349  | 0.128791351 | 0.15471397  | 0.832448102 | 0.405156061 |    | 0.497844927 |
| Ncam2         | 49.03693129 | 0.128576467 | 0.574105856 | 0.223959511 | 0.822788808 |    | 0.867887594 |
| Fam241b       | 46.35075805 | 0.12830166  | 0.396393184 | 0.32367272  | 0.746185826 |    | 0.805839095 |
| Zcchc9        | 243.3978226 | 0.128274029 | 0.187269844 | 0.684968954 | 0.493363512 |    | 0.583305629 |
| Mtpap         | 302.5049933 | 0.128016498 | 0.168570904 | 0.759422267 | 0.447599998 |    | 0.538852112 |
| Gm10647       | 2.535560662 | 0.127952333 | 1.228979888 | 0.104112634 | 0.917079965 |    | 0.938663499 |
| Ccdc115       | 241.2913982 | 0.127723167 | 0.198937084 | 0.642027941 | 0.520855041 |    | 0.609397896 |
| Rpl7a-ps5     | 0.803881292 | 0.127701664 | 2.79165712  | 0.045744036 | 0.963514265 | NA |             |
| Ppan          | 516.6122396 | 0.127439153 | 0.237454737 | 0.536688188 | 0.591483016 |    | 0.674262953 |
| Gm14667       | 32.91435599 | 0.127253309 | 0.516017297 | 0.246606674 | 0.805212639 |    | 0.854163716 |
| Gm10601       | 2.276972429 | 0.126745209 | 1.865360411 | 0.067946767 | 0.94582801  |    | 0.960476288 |
| Gm18890       | 3.310237637 | 0.126462315 | 0.95343751  | 0.132638284 | 0.894479454 |    | 0.922621353 |
| lws1          | 568.4698492 | 0.126176314 | 0.200141959 | 0.630434092 | 0.528410611 |    | 0.61641015  |
| Vmn1r188      | 3.705198895 | 0.126112097 | 0.981861043 | 0.128441899 | 0.897799275 |    | 0.924796758 |
| Lsm4          | 417.7373307 | 0.126079187 | 0.166296258 | 0.758160094 | 0.448355148 |    | 0.539494534 |
| Duxb1         | 5.462846892 | 0.126018365 | 1.116059407 | 0.112913671 | 0.910098998 |    | 0.933869758 |
| Akr1c21       | 3.087094935 | 0.125811467 | 0.988841141 | 0.127231223 | 0.898757394 |    | 0.925639772 |
| Atf4          | 2560.537839 | 0.125555974 | 0.189849884 | 0.661343435 | 0.508392093 |    | 0.597893791 |
| Cby1          | 134.3974247 | 0.125432775 | 0.186463175 | 0.672694625 | 0.501141588 |    | 0.590695465 |
| Tet2          | 498.5585274 | 0.125189199 | 0.234712889 | 0.533371644 | 0.593776342 |    | 0.676334541 |
| Parp16        | 355.4045873 | 0.1250578   | 0.196724084 | 0.635701524 | 0.524970983 |    | 0.613129908 |
| Usp53         | 141.708829  | 0.124076773 | 0.220185299 | 0.563510703 | 0.573087174 |    | 0.656938552 |
| Fopnl         | 306.3690324 | 0.123779409 | 0.240046955 | 0.515646655 | 0.606101219 |    | 0.687525023 |
| Rpl28-ps1     | 3104.106582 | 0.123260105 | 0.137970761 | 0.893378453 | 0.371654537 |    | 0.463867527 |
| Trmt44        | 87.95534472 | 0.123103975 | 0.259294878 | 0.474764392 | 0.634954916 |    | 0.7128086   |
| Blm           | 67.42749254 | 0.12300994  | 0.453065556 | 0.27150583  | 0.786002017 |    | 0.838113734 |
| Lemd3         | 230.9296479 | 0.122969971 | 0.197468829 | 0.622731049 | 0.533461275 |    | 0.621103437 |
| Trim39        | 585.8978257 | 0.122785166 | 0.216299179 | 0.567663578 | 0.570263428 |    | 0.654493801 |
| Lrrc58        | 1036.725519 | 0.12270908  | 0.134309334 | 0.913630317 | 0.360911131 |    | 0.453279281 |
| Reg4          | 1.684734045 | 0.122690206 | 1.551678352 | 0.079069355 | 0.936977459 |    | 0.953476495 |
| Hdac11        | 1186.160848 | 0.1225872   | 0.144636326 | 0.847554714 | 0.396686004 |    | 0.48945941  |
| Faf2          | 1100.743852 | 0.122406405 | 0.21140026  | 0.579026749 | 0.562571125 |    | 0.647203694 |
| Dync1h1       | 2557.401009 | 0.122350075 | 0.124673178 | 0.981366459 | 0.32641206  |    | 0.418019291 |
| St6galnac3    | 22.14478205 | 0.122324204 | 0.722097575 | 0.169401211 | 0.865481071 |    | 0.900776636 |
| Rnf181        | 2390.319558 | 0.122175533 | 0.161980111 | 0.754262558 | 0.45069158  |    | 0.541743943 |
| Nabp2         | 624.7415055 | 0.122117276 | 0.151908187 | 0.803888706 | 0.421461253 |    | 0.513208303 |
| Nktr          | 1290.579792 | 0.122080158 | 0.135179663 | 0.903095593 | 0.366475163 |    | 0.458909098 |
| Olfr578       | 1.898108637 | 0.122040647 | 1.53421393  | 0.079546043 | 0.936598311 |    | 0.953261373 |
| Wnt2b         | 0.426389253 | 0.12156794  | 3.193718203 | 0.038064704 | 0.969636093 | NA |             |
| 2200002D01Rik | 396.13794   | 0.121423854 | 0.188739948 | 0.643339449 | 0.520003864 |    | 0.608485543 |
| Cry1          | 124.5644556 | 0.12077471  | 0.223287299 | 0.540893772 | 0.588580804 |    | 0.671673174 |
| Gm17655       | 31.87386866 | 0.120734117 | 0.485321322 | 0.248771507 | 0.803537532 |    | 0.853023716 |
| Vps35l        | 495.8119875 | 0.120701405 | 0.130964264 | 0.921636192 | 0.356718374 |    | 0.449105298 |
| Taf8          | 240.6119006 | 0.120617177 | 0.209661952 | 0.57529359  | 0.565092756 |    | 0.649356683 |
| Smpd1         | 782.2890441 | 0.120277574 | 0.193284718 | 0.622281862 | 0.533756546 |    | 0.62120983  |
| Gm5069        | 2.526590571 | 0.120219162 | 1.221119944 | 0.098449921 | 0.921575036 |    | 0.942022671 |
| Golph3        | 1513.223309 | 0.120017348 | 0.178566469 | 0.672115813 | 0.50150997  |    | 0.590941525 |
| Gm49396       | 165.2091926 | 0.119928959 | 0.197665579 | 0.606726571 | 0.544032386 |    | 0.63050062  |
| Rnf25         | 382.429611  | 0.119920703 | 0.143410553 | 0.836205571 | 0.403039265 |    | 0.496064588 |
| Armc5         | 219.6357988 | 0.119734671 | 0.190970149 | 0.626981083 | 0.530671636 |    | 0.61841773  |
| Olfr1183      | 7.458625595 | 0.119653556 | 0.801993488 | 0.149195171 | 0.88139963  |    | 0.912830381 |

|               |             |             |             |             |             |             |
|---------------|-------------|-------------|-------------|-------------|-------------|-------------|
| Pde6a         | 12.62684638 | 0.119635614 | 0.545723398 | 0.219223903 | 0.826475636 | 0.870813142 |
| Pim2          | 81.76498871 | 0.119470426 | 0.237972461 | 0.502034668 | 0.615643135 | 0.695987014 |
| Med13l        | 301.4878221 | 0.119416998 | 0.159846499 | 0.747072965 | 0.455019518 | 0.545818516 |
| Ehbp1         | 210.368333  | 0.11921529  | 0.18911351  | 0.630390128 | 0.528439368 | 0.61641015  |
| Cdc42bpb      | 1461.85289  | 0.119154035 | 0.212232879 | 0.561430611 | 0.574504021 | 0.658164407 |
| Pnrc1         | 1736.522553 | 0.119146596 | 0.158300145 | 0.752662579 | 0.451652702 | 0.542581585 |
| 1700030K09Rik | 92.69654173 | 0.119099178 | 0.275329782 | 0.43256918  | 0.665327784 | 0.738555386 |
| Dnm2          | 1201.540641 | 0.118899444 | 0.17465346  | 0.680773479 | 0.496014834 | 0.585863666 |
| Rpl36         | 3346.113154 | 0.118832326 | 0.153701537 | 0.773136871 | 0.439441382 | 0.530679088 |
| Olfr975       | 4.535939157 | 0.118440491 | 0.869374712 | 0.136236412 | 0.891634391 | 0.920410723 |
| Tor1aip1      | 1043.90119  | 0.118352111 | 0.177581008 | 0.66646829  | 0.505111826 | 0.594282015 |
| Emc8          | 398.0889668 | 0.118343989 | 0.171140935 | 0.691500188 | 0.489251263 | 0.579058284 |
| Nab1          | 1000.297163 | 0.118191734 | 0.159250538 | 0.742174787 | 0.457981443 | 0.548638018 |
| Asphd1        | 2.526237368 | 0.118167406 | 1.384898631 | 0.085325672 | 0.932002483 | 0.94983132  |
| Dmxl1         | 445.1110672 | 0.118016532 | 0.178547223 | 0.660982175 | 0.508623745 | 0.598083709 |
| Mphosph8      | 287.8269779 | 0.117853082 | 0.225928249 | 0.521639425 | 0.601921408 | 0.683739083 |
| Gm7536        | 4806.79401  | 0.117826301 | 0.143064224 | 0.823590254 | 0.410172415 | 0.502415529 |
| Mtfmt         | 203.3276162 | 0.117571058 | 0.270825185 | 0.434121584 | 0.664200152 | 0.737577136 |
| Zfpl1         | 343.3721784 | 0.11750434  | 0.136147696 | 0.863065205 | 0.388101617 | 0.480420881 |
| Tiam2         | 264.6368667 | 0.117366007 | 0.259108988 | 0.452959998 | 0.650577546 | 0.72613893  |
| Gabpb2        | 688.4927588 | 0.117363665 | 0.153605909 | 0.764056968 | 0.444833295 | 0.535937669 |
| Cops5         | 1197.084257 | 0.117264171 | 0.142776879 | 0.821310651 | 0.411469342 | 0.503678419 |
| Zfp830        | 159.3908925 | 0.117151262 | 0.219282929 | 0.534247068 | 0.593170609 | 0.67591555  |
| Vrk3          | 471.7682366 | 0.117024583 | 0.139568152 | 0.838476266 | 0.401763272 | 0.494924508 |
| Med17         | 293.1435207 | 0.116988344 | 0.194824819 | 0.600479673 | 0.548186604 | 0.633921832 |
| Gm7241        | 0.521047337 | 0.116840766 | 2.591440165 | 0.045087194 | 0.964037808 | NA          |
| Fis1          | 1289.841988 | 0.116674992 | 0.199166369 | 0.585816735 | 0.557998676 | 0.643179821 |
| Mars2         | 96.78834975 | 0.116411319 | 0.22940313  | 0.507453056 | 0.611836967 | 0.692558089 |
| Ddx20         | 222.4766716 | 0.116399823 | 0.224164672 | 0.519260338 | 0.603579207 | 0.685256948 |
| Nt5dc3        | 371.9390199 | 0.116397715 | 0.234680946 | 0.495982812 | 0.619906538 | 0.699461689 |
| Chd7          | 310.4996715 | 0.116329123 | 0.254952574 | 0.456277501 | 0.648190441 | 0.724043417 |
| Gigyf1        | 979.2903053 | 0.1163035   | 0.288086044 | 0.403710983 | 0.686425262 | 0.756785738 |
| Vps52         | 498.1452813 | 0.116286252 | 0.17814313  | 0.65276866  | 0.513905431 | 0.602756091 |
| Prpf40a       | 1015.591484 | 0.116249816 | 0.198455702 | 0.585772111 | 0.558028668 | 0.643179821 |
| Cnst          | 207.7651828 | 0.116231517 | 0.305272642 | 0.380746588 | 0.703391296 | 0.770359425 |
| Rpl22         | 2032.733535 | 0.116215667 | 0.156244602 | 0.743805965 | 0.456993871 | 0.547749328 |
| Zbtb33        | 385.2289866 | 0.116079369 | 0.232870918 | 0.498470869 | 0.618152197 | 0.698082847 |
| Bbc3          | 292.6504125 | 0.11596855  | 0.193219153 | 0.600191792 | 0.548378423 | 0.634028848 |
| Zfp182        | 163.0228946 | 0.115809677 | 0.263788755 | 0.439024311 | 0.660643921 | 0.734872606 |
| Nus1          | 876.016869  | 0.115510118 | 0.151260645 | 0.763649511 | 0.445076136 | 0.536154464 |
| Tcp1          | 2129.909751 | 0.115379685 | 0.162535297 | 0.709874634 | 0.477781882 | 0.568170784 |
| Alkbh6        | 205.0082303 | 0.115216455 | 0.172627597 | 0.667427789 | 0.504498921 | 0.593777979 |
| Olfr237       | 3.212224174 | 0.114769154 | 0.997819524 | 0.115019953 | 0.908429307 | 0.93266503  |
| Nasp          | 378.606532  | 0.114763371 | 0.169874448 | 0.675577594 | 0.499308871 | 0.588754851 |
| Vmn2r29       | 13.82249358 | 0.114595249 | 0.799046268 | 0.143415035 | 0.885962409 | 0.91640555  |
| Smn1          | 159.2359877 | 0.114338612 | 0.22887058  | 0.499577587 | 0.617372543 | 0.697387166 |
| Prelid3b      | 665.6992539 | 0.114187276 | 0.140108097 | 0.814994124 | 0.415075674 | 0.507182489 |
| Ccp110        | 179.2898595 | 0.113676752 | 0.230294474 | 0.493614763 | 0.621578273 | 0.700791376 |
| Wdr73         | 275.8671691 | 0.113498721 | 0.149899506 | 0.757165409 | 0.448950771 | 0.540020655 |
| Sox5          | 300.2226091 | 0.113230006 | 0.251103065 | 0.4509304   | 0.652039712 | 0.727437538 |
| Hspa1b        | 244.654872  | 0.112530536 | 0.357087275 | 0.315134546 | 0.7526595   | 0.811288515 |
| Cstf2         | 280.2698418 | 0.112502643 | 0.215495933 | 0.522063879 | 0.601625855 | 0.683494441 |
| Hspd1-ps3     | 6.274209781 | 0.112021409 | 0.869617324 | 0.128816902 | 0.897502531 | 0.924620689 |
| Lime1         | 209.1938641 | 0.111963767 | 0.227529334 | 0.492084976 | 0.622659273 | 0.701870886 |
| Rbm42         | 923.5913091 | 0.111952856 | 0.157637712 | 0.710190825 | 0.47758581  | 0.568051552 |
| Taok1         | 918.2146133 | 0.111940527 | 0.125907226 | 0.889071505 | 0.373964652 | 0.466204709 |
| Gm20694       | 0.425033561 | 0.111853825 | 3.180854921 | 0.035164705 | 0.971948406 | NA          |
| Washc1        | 476.0395338 | 0.111762107 | 0.171448336 | 0.651870472 | 0.514484735 | 0.603145081 |
| Mfap1b        | 408.7304963 | 0.111725149 | 0.158537852 | 0.704722235 | 0.480983112 | 0.571295206 |
| Pdcd10        | 406.8276994 | 0.111661707 | 0.173181099 | 0.644768437 | 0.519077259 | 0.60769325  |
| Erbin         | 1420.128602 | 0.111439292 | 0.169355408 | 0.658020274 | 0.510525104 | 0.599864358 |
| Abcf2         | 645.8910639 | 0.111364876 | 0.167086614 | 0.666509857 | 0.505085265 | 0.594282015 |
| Frm4d4b       | 1212.517153 | 0.110991315 | 0.211911156 | 0.523763437 | 0.600443087 | 0.682378091 |
| Rnf139        | 712.5204704 | 0.110887058 | 0.17952534  | 0.617668002 | 0.536794208 | 0.623978431 |
| Atp6v0c-ps2   | 1.785956213 | 0.110672905 | 2.444339911 | 0.045277216 | 0.963886348 | 0.973474141 |
| Tnrc6a        | 1802.518521 | 0.110421159 | 0.139428842 | 0.791953496 | 0.428387793 | 0.52024185  |

|            |             |             |             |             |                |             |
|------------|-------------|-------------|-------------|-------------|----------------|-------------|
| Elavl1     | 809.5309016 | 0.110342704 | 0.183901959 | 0.60000831  | 0.548500697    | 0.634127213 |
| Wdr54      | 12.32571776 | 0.110168324 | 0.530381063 | 0.207715418 | 0.835451178    | 0.877504262 |
| Lmbr1l     | 492.5637508 | 0.110012736 | 0.166685529 | 0.660001721 | 0.509252725    | 0.598740721 |
| Dnah17     | 28.67609664 | 0.11000752  | 0.415672518 | 0.26464949  | 0.791279491    | 0.842581685 |
| Gm41041    | 0.50906593  | 0.109770898 | 3.029928069 | 0.036228879 | 0.971099859 NA |             |
| Thsd1      | 81.31036076 | 0.109647879 | 0.271388263 | 0.40402587  | 0.686193695    | 0.756579363 |
| Plekhh3    | 217.8557367 | 0.109532253 | 0.239111681 | 0.45807989  | 0.646895046    | 0.72288062  |
| Fgd5       | 110.7421971 | 0.109320508 | 0.303868908 | 0.359762072 | 0.719025069    | 0.783455156 |
| Srp19      | 431.6459718 | 0.10930487  | 0.159743263 | 0.684253395 | 0.493815171    | 0.58369887  |
| Jmjd4      | 212.0337908 | 0.108922124 | 0.249760851 | 0.436105674 | 0.662760061    | 0.736697758 |
| Alkbh1     | 283.0585444 | 0.108779675 | 0.247684586 | 0.439186291 | 0.660526557    | 0.734839991 |
| Gal3st3    | 3.105436537 | 0.108695889 | 1.008686476 | 0.107759836 | 0.914186204    | 0.936657636 |
| Olfr780    | 1.160201638 | 0.108662564 | 1.837118529 | 0.059148369 | 0.952833934 NA |             |
| Rps6       | 4834.955009 | 0.108329538 | 0.171125057 | 0.633043107 | 0.526705493    | 0.614850401 |
| Prss22     | 0.77216215  | 0.108140022 | 2.323182512 | 0.046548225 | 0.962873298 NA |             |
| Olfr1484   | 3.686368937 | 0.108066451 | 1.284142863 | 0.08415454  | 0.932933562    | 0.950325727 |
| Zfp709     | 73.12081624 | 0.107599475 | 0.32049633  | 0.335727633 | 0.737076266    | 0.798632018 |
| Olfr1      | 0.507751133 | 0.107533606 | 3.031301062 | 0.035474406 | 0.971701454 NA |             |
| Gm28362    | 0.42184894  | 0.10740536  | 3.187449146 | 0.033696337 | 0.9731193 NA   |             |
| Gm15168    | 0.449282213 | 0.107072606 | 2.678812066 | 0.039970182 | 0.968116898 NA |             |
| Mcc        | 749.7433856 | 0.106798402 | 0.260062128 | 0.410664955 | 0.681318227    | 0.752253406 |
| Commd8     | 353.7411552 | 0.106636966 | 0.204285266 | 0.522000282 | 0.601670134    | 0.683499197 |
| Rbm19      | 212.0856538 | 0.106538739 | 0.189663554 | 0.561724891 | 0.574303473    | 0.658023093 |
| Zfp39      | 142.062378  | 0.106408519 | 0.225454816 | 0.471972702 | 0.636946274    | 0.714249414 |
| Gm15042    | 0.828143136 | 0.106316972 | 2.393185141 | 0.044424884 | 0.964565727 NA |             |
| Zfp706     | 1699.173302 | 0.106179751 | 0.176435244 | 0.601805788 | 0.547303422    | 0.633430329 |
| Mob4       | 436.1414666 | 0.106011006 | 0.147248903 | 0.719944282 | 0.471559302    | 0.562177831 |
| Tpcn1      | 1023.938131 | 0.105924495 | 0.200173234 | 0.529164127 | 0.596691599    | 0.679292046 |
| Rnaset2b   | 1815.895381 | 0.105897315 | 0.145024077 | 0.730205066 | 0.465264846    | 0.555723051 |
| H2ac15     | 2.328550035 | 0.105817566 | 1.671953606 | 0.063289774 | 0.949535759    | 0.96326662  |
| Stxbp5     | 265.2012691 | 0.105693259 | 0.173851729 | 0.607950576 | 0.543220254    | 0.629710273 |
| Bves       | 1.737495379 | 0.105675252 | 1.351814749 | 0.07817288  | 0.937690535    | 0.954031286 |
| Ccar1      | 1033.130849 | 0.105634544 | 0.140803967 | 0.750224204 | 0.453119684    | 0.544037212 |
| Trim26     | 968.8692865 | 0.105366044 | 0.193258171 | 0.545208741 | 0.58560996     | 0.668685774 |
| Cyb5d1     | 141.4431279 | 0.105251473 | 0.288200363 | 0.36520243  | 0.714960304    | 0.779823625 |
| Gm32858    | 0.447017222 | 0.105202983 | 2.678393671 | 0.039278387 | 0.968668438 NA |             |
| Eif4g2     | 7164.806132 | 0.104970766 | 0.138293804 | 0.759041716 | 0.447827603    | 0.539088051 |
| Chfr       | 392.3016103 | 0.104927552 | 0.253868024 | 0.413315355 | 0.679375581    | 0.750658477 |
| Hif1an     | 539.8479356 | 0.104921076 | 0.156474579 | 0.670531126 | 0.502519271    | 0.591967146 |
| Tada2a     | 167.9025791 | 0.104834629 | 0.216767929 | 0.483626105 | 0.628651245    | 0.707362314 |
| Tmem128    | 290.1328767 | 0.104785588 | 0.148738293 | 0.704496373 | 0.481123708    | 0.571382582 |
| Atp6v1d    | 617.4039531 | 0.104772234 | 0.180403394 | 0.580766423 | 0.561397888    | 0.646265933 |
| Gm14308    | 25.97481925 | 0.104472022 | 0.566998644 | 0.184254447 | 0.853813848    | 0.891791354 |
| Alkbh5     | 999.3365529 | 0.104377461 | 0.185969159 | 0.561262207 | 0.574618801    | 0.658251668 |
| Srp54c     | 563.162305  | 0.103888561 | 0.228036542 | 0.455578565 | 0.64869306     | 0.724468933 |
| Gm6576     | 0.4384428   | 0.103628578 | 2.691172881 | 0.038506845 | 0.969283574 NA |             |
| Gm5560     | 0.438433818 | 0.103581583 | 2.691183378 | 0.038489233 | 0.969297616 NA |             |
| Gm21092    | 25.14465911 | 0.10343235  | 0.471410351 | 0.219410435 | 0.826330342    | 0.870713868 |
| Adcy5      | 19.90712649 | 0.103427565 | 0.478935462 | 0.215953033 | 0.829024358    | 0.873012988 |
| Gm9294     | 0.446669221 | 0.103427365 | 2.678755224 | 0.038610233 | 0.969201143 NA |             |
| Gle1       | 568.7236272 | 0.103346633 | 0.235592145 | 0.438667568 | 0.66090243     | 0.735064237 |
| Chtop      | 1078.490329 | 0.103315377 | 0.14059813  | 0.73482753  | 0.462444539    | 0.55293551  |
| Atr        | 266.1113325 | 0.102843431 | 0.242845723 | 0.423492864 | 0.671935704    | 0.744034807 |
| Chm        | 240.4525987 | 0.102809307 | 0.217279077 | 0.473167085 | 0.636093979    | 0.713570452 |
| Akap10     | 210.0990878 | 0.102705918 | 0.170433079 | 0.602617278 | 0.546763324    | 0.633020112 |
| Hoxb1      | 5.943250244 | 0.102633934 | 0.893376919 | 0.114883126 | 0.90853776     | 0.93271937  |
| Spin1      | 1035.936736 | 0.10214182  | 0.153134761 | 0.667006101 | 0.504768236    | 0.593959753 |
| Tubb2a-ps2 | 0.446327286 | 0.10179708  | 2.679107802 | 0.037996635 | 0.969690365 NA |             |
| Pcgf3      | 580.3123229 | 0.101616062 | 0.152101728 | 0.668079602 | 0.504082782    | 0.593439905 |
| Disp1      | 66.75573083 | 0.101561852 | 0.387024755 | 0.262416939 | 0.793000015    | 0.843992025 |
| Vmn1r209   | 8.236023877 | 0.10147831  | 0.656746095 | 0.154516808 | 0.87720226     | 0.909733235 |
| Bicap      | 534.1177129 | 0.101444967 | 0.171051242 | 0.593067703 | 0.553135844    | 0.638446843 |
| Rprd1a     | 324.3771598 | 0.101222874 | 0.192552663 | 0.525689299 | 0.5991041      | 0.681401475 |
| Rpl28      | 3263.116957 | 0.100883451 | 0.151240547 | 0.667039711 | 0.504746768    | 0.593959753 |
| Pinx1      | 103.7582684 | 0.100772647 | 0.242311147 | 0.415881184 | 0.677496949    | 0.748830911 |
| Akap3      | 0.446106202 | 0.100738792 | 2.679336331 | 0.037598412 | 0.970007874 NA |             |



|               |             |             |             |             |             |             |
|---------------|-------------|-------------|-------------|-------------|-------------|-------------|
| Commd5        | 242.783621  | 0.100697139 | 0.187475816 | 0.53712069  | 0.59118425  | 0.67396744  |
| Pla2g3        | 1.842909388 | 0.100435726 | 1.507353483 | 0.066630506 | 0.946875859 | 0.961254073 |
| Ubqln4        | 661.4578685 | 0.100216037 | 0.177615912 | 0.564228937 | 0.572598337 | 0.656603805 |
| Gtf3c1        | 1020.274739 | 0.099906963 | 0.201124884 | 0.496740934 | 0.619371752 | 0.699134964 |
| Nelfa         | 304.2837339 | 0.099858162 | 0.223853342 | 0.44608743  | 0.655534092 | 0.73057104  |
| Mink1         | 1340.68828  | 0.09960815  | 0.155254952 | 0.641577926 | 0.521147269 | 0.609658142 |
| Rfx1          | 331.9283173 | 0.099308002 | 0.200181331 | 0.496090226 | 0.619830755 | 0.699424531 |
| AC149090.1    | 5293.627792 | 0.099143212 | 0.180738942 | 0.548543721 | 0.583318618 | 0.666480544 |
| Cse1l         | 667.439626  | 0.099125586 | 0.240343467 | 0.412433039 | 0.680022051 | 0.751086228 |
| Rorb          | 1.47888288  | 0.09824585  | 1.45539222  | 0.067504724 | 0.946179901 | NA          |
| Nosip         | 518.3988156 | 0.09818633  | 0.178085459 | 0.55134389  | 0.581397957 | 0.664900541 |
| Rps17         | 5009.547257 | 0.098113355 | 0.145930364 | 0.672329952 | 0.501373666 | 0.590862592 |
| Orc5          | 305.7935942 | 0.097854171 | 0.250313954 | 0.390925753 | 0.695852117 | 0.764656884 |
| Lamb3         | 90.21022042 | 0.097823441 | 0.351053592 | 0.278656716 | 0.780508283 | 0.833908322 |
| Usp44         | 1.3935763   | 0.097719389 | 1.676827547 | 0.05827635  | 0.953528506 | NA          |
| Kdsr          | 373.1220596 | 0.097617261 | 0.204134038 | 0.478201782 | 0.632506594 | 0.710668452 |
| Ltv1          | 296.9032684 | 0.097590713 | 0.209828042 | 0.465098528 | 0.6418609   | 0.718849816 |
| Morf4l1       | 3409.464304 | 0.097454221 | 0.142846175 | 0.682231925 | 0.495092311 | 0.584996792 |
| H1f4          | 20.63523733 | 0.097314261 | 0.576048628 | 0.168934108 | 0.865848471 | 0.901104006 |
| Gm20432       | 0.439385469 | 0.097198201 | 3.151552079 | 0.030841376 | 0.975396043 | NA          |
| Thoc7         | 835.2576181 | 0.09717784  | 0.158061027 | 0.614812151 | 0.538678784 | 0.625827716 |
| Nrde2         | 212.4572089 | 0.097099897 | 0.189476379 | 0.512464392 | 0.608326035 | 0.68945235  |
| Gm16570       | 0.463699091 | 0.097041064 | 2.663247088 | 0.036437124 | 0.970933813 | NA          |
| Serf1         | 108.450901  | 0.097014968 | 0.347161498 | 0.279451979 | 0.779897985 | 0.833481749 |
| Fam3a         | 398.5959562 | 0.09683793  | 0.162634053 | 0.595434524 | 0.551553054 | 0.637051251 |
| Tent2         | 557.3525767 | 0.096599597 | 0.131032099 | 0.737220862 | 0.460988049 | 0.551485216 |
| 2510039018Rik | 529.131389  | 0.096563776 | 0.175209386 | 0.551133579 | 0.581542108 | 0.665020785 |
| Ppie          | 243.5607983 | 0.096493341 | 0.160718704 | 0.600386504 | 0.54824868  | 0.633921832 |
| Gpn1          | 285.7688257 | 0.096461584 | 0.209132573 | 0.461246103 | 0.644622048 | 0.721049582 |
| Gm28041       | 0.526319107 | 0.09583297  | 3.003835662 | 0.031903533 | 0.974548981 | NA          |
| Mapk6         | 642.0968765 | 0.095674886 | 0.159335525 | 0.600461736 | 0.548198555 | 0.633921832 |
| Prnp          | 655.5507949 | 0.095596144 | 0.200886326 | 0.47587183  | 0.634165692 | 0.712250921 |
| Wdfy2         | 442.0856948 | 0.095562935 | 0.134158162 | 0.712315476 | 0.476269443 | 0.566978503 |
| D830030K20Rik | 6.196451919 | 0.095357606 | 0.849126472 | 0.112300828 | 0.910584885 | 0.934146776 |
| Tarm1         | 7.691311116 | 0.095340879 | 0.797213824 | 0.119592606 | 0.904805877 | 0.929968744 |
| Bap1          | 713.5365651 | 0.095288605 | 0.138432695 | 0.688338868 | 0.491239411 | 0.58116929  |
| Lnx1          | 7.451964567 | 0.095284557 | 0.803507916 | 0.11858571  | 0.905603587 | 0.930492403 |
| Zfp644        | 330.3868541 | 0.095098054 | 0.284027293 | 0.334820126 | 0.737760777 | 0.799170526 |
| BC025920      | 41.92902871 | 0.094759269 | 0.333031031 | 0.284535854 | 0.775999761 | 0.830529819 |
| Rpl7a         | 9149.932614 | 0.094679412 | 0.161732062 | 0.585409042 | 0.55827271  | 0.643374107 |
| Usp16         | 568.3672211 | 0.094665443 | 0.236484052 | 0.400303711 | 0.688932835 | 0.758993828 |
| Cybrd1        | 5.841289804 | 0.094316869 | 1.112822268 | 0.084754656 | 0.932456443 | 0.950123569 |
| Vmn1r184      | 3.76004329  | 0.094307357 | 1.161549099 | 0.081191021 | 0.93529004  | 0.952186443 |
| U2af2         | 1941.113251 | 0.094116436 | 0.143051578 | 0.657919593 | 0.5105898   | 0.599899029 |
| Nans          | 354.2809966 | 0.094021867 | 0.347999231 | 0.270178377 | 0.787023027 | 0.839097471 |
| Gm20498       | 83.93810428 | 0.093912367 | 0.412880416 | 0.227456578 | 0.82006873  | 0.865614    |
| Atp13a1       | 1110.556588 | 0.09385936  | 0.158599362 | 0.591802737 | 0.55398269  | 0.639164652 |
| Rsph3a        | 365.9458921 | 0.093764324 | 0.172386229 | 0.543920035 | 0.586496502 | 0.669608382 |
| Gm10617       | 0.54181738  | 0.093752552 | 2.570640288 | 0.036470506 | 0.970907196 | NA          |
| Cdc123        | 822.9646817 | 0.09364797  | 0.205157296 | 0.456469117 | 0.648052674 | 0.723936962 |
| Serac1        | 60.0526837  | 0.093213512 | 0.282442056 | 0.330027029 | 0.741379539 | 0.802242845 |
| Herc1         | 763.2757823 | 0.093156503 | 0.126308474 | 0.737531696 | 0.460799075 | 0.551354761 |
| Tmem251       | 132.0384779 | 0.093117072 | 0.254405798 | 0.366017885 | 0.71435173  | 0.779259553 |
| Cyp4f41-ps    | 5.114034312 | 0.093114449 | 0.843211192 | 0.110428384 | 0.912069644 | 0.935332248 |
| Hps1          | 202.8066266 | 0.092994392 | 0.274208527 | 0.339137493 | 0.734506155 | 0.796454709 |
| Ankrd49       | 150.5540725 | 0.092955213 | 0.199907984 | 0.464989997 | 0.64193862  | 0.718849816 |
| Vmn1r42       | 3.396195281 | 0.092747571 | 1.014533197 | 0.091418961 | 0.927159696 | 0.946196857 |
| Glicc1        | 91.6991448  | 0.09254127  | 0.339606712 | 0.272495408 | 0.785241122 | 0.837669147 |
| Rasl12        | 28.61462419 | 0.092518357 | 0.415995938 | 0.222402067 | 0.824000903 | 0.868957528 |
| Trim41        | 778.8853999 | 0.092361093 | 0.240833951 | 0.383505284 | 0.701345153 | 0.769021859 |
| D17H6S53E     | 177.5169847 | 0.092321681 | 0.227828737 | 0.405224039 | 0.685312836 | 0.755803676 |
| Gkap1         | 251.1712179 | 0.09219205  | 0.194500628 | 0.473993585 | 0.635504482 | 0.713096848 |
| Slc4a1        | 3.664993852 | 0.091925492 | 1.443949586 | 0.063662536 | 0.949238936 | 0.963168252 |
| Nphp3         | 232.9630163 | 0.091809318 | 0.331989616 | 0.276542739 | 0.782131238 | 0.83530362  |
| Jagn1         | 484.8767156 | 0.091776183 | 0.165085294 | 0.555931911 | 0.578257402 | 0.661841705 |
| Gm34248       | 0.54267859  | 0.091613549 | 2.984409177 | 0.030697382 | 0.975510879 | NA          |

|               |             |             |             |             |                |             |
|---------------|-------------|-------------|-------------|-------------|----------------|-------------|
| Aplp2         | 5860.901138 | 0.091191559 | 0.131015033 | 0.696038895 | 0.486404472    | 0.576649752 |
| Kdelr2        | 1696.220977 | 0.091141455 | 0.123028967 | 0.740812976 | 0.458806847    | 0.549395176 |
| Gm7027        | 0.462785818 | 0.090771471 | 2.664454681 | 0.03406756  | 0.972823276 NA |             |
| Gtf2h1        | 445.5478389 | 0.090715004 | 0.146179702 | 0.620571825 | 0.534881382    | 0.62209427  |
| Dixdc1        | 412.999417  | 0.090708269 | 0.197021854 | 0.460396994 | 0.645231292    | 0.721393613 |
| Zdhhc17       | 277.4048769 | 0.090678655 | 0.1694558   | 0.535116858 | 0.592569054    | 0.675320357 |
| Chst3         | 9.97384954  | 0.09051355  | 0.642435892 | 0.140891179 | 0.887955911    | 0.917780548 |
| Nedd8         | 1217.785358 | 0.090333276 | 0.185467276 | 0.487057758 | 0.626217401    | 0.705228845 |
| Hnrnpc        | 1963.715648 | 0.090309529 | 0.163890804 | 0.551034753 | 0.581609851    | 0.665027248 |
| Hmgb1         | 2952.332926 | 0.090275729 | 0.159643218 | 0.565484274 | 0.571744418    | 0.655884451 |
| Trim54        | 0.431939827 | 0.09023095  | 2.701195385 | 0.033404081 | 0.973352355 NA |             |
| Gm18829       | 0.455199266 | 0.090131241 | 2.672595403 | 0.033724237 | 0.973097051 NA |             |
| Plekhh1       | 420.9691584 | 0.089829373 | 0.191984089 | 0.467900092 | 0.639856037    | 0.717035807 |
| Snx16         | 78.74911523 | 0.089648122 | 0.314298766 | 0.285232178 | 0.775466269    | 0.830202773 |
| Vac14         | 418.5114113 | 0.089497352 | 0.143785286 | 0.622437488 | 0.533654236    | 0.621194384 |
| Tmprss11d     | 5.588445796 | 0.089371787 | 0.963375962 | 0.092769376 | 0.92608678     | 0.945441489 |
| Myl6          | 4841.34724  | 0.089073324 | 0.19084257  | 0.466737186 | 0.640687921    | 0.717854435 |
| Il17rc        | 488.3984164 | 0.088782272 | 0.144806378 | 0.613110235 | 0.539803453    | 0.626920722 |
| Bcar1         | 968.0986317 | 0.088648166 | 0.210692072 | 0.420747518 | 0.673939459    | 0.745672371 |
| Gm49331       | 33.6324402  | 0.088606113 | 0.362065827 | 0.244723767 | 0.806670324    | 0.855497088 |
| Zcchc8        | 518.2232851 | 0.088561226 | 0.20984494  | 0.422031746 | 0.673001846    | 0.744973409 |
| Exd2          | 257.4387998 | 0.088358413 | 0.174019761 | 0.50774931  | 0.611629163    | 0.692459421 |
| Kcnj12        | 0.46134185  | 0.087986592 | 2.666419588 | 0.032998029 | 0.973676159 NA |             |
| Gng8          | 2.514186304 | 0.087548432 | 1.17001107  | 0.074827012 | 0.94035235     | 0.956090736 |
| Wdr41         | 286.235009  | 0.086818572 | 0.139166532 | 0.623846629 | 0.532728314    | 0.620351932 |
| Swsap1        | 104.6801071 | 0.08677119  | 0.228037244 | 0.380513239 | 0.703564471    | 0.770450097 |
| Trnt1         | 318.2276404 | 0.086724651 | 0.161285236 | 0.537709796 | 0.590777415    | 0.673593725 |
| Sgip1         | 29.12929142 | 0.086353174 | 0.420840933 | 0.205191954 | 0.837422155    | 0.878978753 |
| Rabep1        | 938.277281  | 0.086267732 | 0.129243466 | 0.667482347 | 0.504464082    | 0.593777979 |
| Fam120a       | 3196.353599 | 0.086237553 | 0.201438458 | 0.428108685 | 0.668571994    | 0.741330646 |
| Psmb11        | 19.5577309  | 0.086229518 | 0.456055612 | 0.189076761 | 0.850032655    | 0.88898575  |
| Arnt          | 723.3834318 | 0.086003951 | 0.235236499 | 0.36560632  | 0.714658858    | 0.779544706 |
| Gm6906        | 1.735164833 | 0.08598315  | 1.991741778 | 0.043169828 | 0.965566156    | 0.974598688 |
| Fam91a1       | 1382.439747 | 0.084868584 | 0.155001745 | 0.54753309  | 0.584012543    | 0.667174552 |
| Ihh           | 82.37121195 | 0.084574576 | 0.35693372  | 0.236947565 | 0.812697469    | 0.859987332 |
| C1rb          | 1.738462829 | 0.084398349 | 1.745829196 | 0.048342844 | 0.96144301     | 0.971817884 |
| Hdgf          | 3076.795609 | 0.084364283 | 0.228493716 | 0.36921927  | 0.711964294    | 0.777432153 |
| Vsig2         | 26.19544636 | 0.084362169 | 0.363818788 | 0.231879639 | 0.816631499    | 0.863001104 |
| Zc3hav1       | 1007.667983 | 0.084203856 | 0.193032709 | 0.436215482 | 0.662680396    | 0.736657238 |
| Gm6710        | 43.03287142 | 0.08409945  | 0.403519978 | 0.208414588 | 0.834905267    | 0.877127977 |
| Eef1d         | 1791.173265 | 0.083670779 | 0.139097521 | 0.601526023 | 0.547489685    | 0.633516877 |
| Toe1          | 162.2058209 | 0.083631124 | 0.19382463  | 0.431478312 | 0.666120619    | 0.739180128 |
| Gm6733        | 0.554709297 | 0.083494747 | 2.971274777 | 0.028100648 | 0.977581877 NA |             |
| Slk           | 871.0130518 | 0.083248659 | 0.171654493 | 0.484978037 | 0.627691925    | 0.706376126 |
| Pcnx3         | 976.5824085 | 0.082934594 | 0.13990052  | 0.592811194 | 0.553307516    | 0.638601755 |
| Usp42         | 200.180678  | 0.082879776 | 0.258911074 | 0.320109042 | 0.748885671    | 0.807956723 |
| Taok3         | 717.7608636 | 0.082637765 | 0.189997954 | 0.43494029  | 0.663605769    | 0.73720521  |
| Lsr           | 3306.141537 | 0.082536617 | 0.156378298 | 0.527800967 | 0.597637486    | 0.68014178  |
| Sft2d3        | 108.6416097 | 0.082184636 | 0.253309775 | 0.324443207 | 0.745602513    | 0.805413233 |
| Zc3h6         | 75.89105147 | 0.08210202  | 0.361777285 | 0.226940781 | 0.82046979     | 0.865822902 |
| Znf41-ps      | 35.5812538  | 0.081963536 | 0.390796254 | 0.209734701 | 0.83387474     | 0.876388421 |
| Vmn1r82       | 3.595375514 | 0.081942013 | 0.937588309 | 0.087396581 | 0.930356287    | 0.948607295 |
| Slx1b         | 240.3263281 | 0.081924455 | 0.190704598 | 0.429588255 | 0.667495182    | 0.740427513 |
| Dcaf5         | 736.8103679 | 0.081901214 | 0.210159227 | 0.389710294 | 0.696750784    | 0.765436765 |
| Rad9b         | 63.60799663 | 0.08132941  | 0.386395926 | 0.210482058 | 0.833291454    | 0.875937397 |
| 1600029015Rik | 0.455250989 | 0.081302921 | 3.12551258  | 0.026012668 | 0.979247234 NA |             |
| Rabac1        | 991.685901  | 0.081183093 | 0.1714169   | 0.473600288 | 0.63578497     | 0.713317682 |
| Rpl26         | 5115.367545 | 0.080759124 | 0.102481017 | 0.78803984  | 0.430673403    | 0.52216202  |
| Map1lc3b      | 2544.05107  | 0.080427939 | 0.206869242 | 0.388786357 | 0.697434194    | 0.765828502 |
| Pabpc4        | 733.5233278 | 0.080416815 | 0.211668097 | 0.379919395 | 0.704005249    | 0.770734748 |
| Stk3          | 232.1878115 | 0.080352503 | 0.212098613 | 0.378845018 | 0.704802955    | 0.771409911 |
| Top3a         | 145.1470571 | 0.079868703 | 0.236229438 | 0.338098012 | 0.735289329    | 0.797202523 |
| Tex30         | 99.32766613 | 0.07985398  | 0.286040923 | 0.279169773 | 0.78011454     | 0.833660921 |
| CR974586.3    | 1.552036975 | 0.079592563 | 2.040426647 | 0.039007804 | 0.968884166 NA |             |
| Gm3893        | 1.552036975 | 0.079592563 | 2.040426647 | 0.039007804 | 0.968884166 NA |             |
| Ddx24         | 755.2743164 | 0.079512544 | 0.160748437 | 0.49463961  | 0.620854537    | 0.700285782 |

|               |             |             |             |             |             |             |
|---------------|-------------|-------------|-------------|-------------|-------------|-------------|
| Polr1b        | 366.8394457 | 0.079082579 | 0.249424198 | 0.317060573 | 0.751197641 | 0.809917618 |
| Gnat2         | 18.58499025 | 0.07891732  | 0.487993598 | 0.161717942 | 0.871527975 | 0.90486047  |
| Lrrc4c        | 14.96661038 | 0.078907047 | 0.611454552 | 0.129048097 | 0.897319591 | 0.924488088 |
| Nav2          | 1770.519564 | 0.0788087   | 0.205621024 | 0.383271606 | 0.70151839  | 0.769136282 |
| Tardbp        | 2540.420907 | 0.078644689 | 0.152135538 | 0.516938317 | 0.605199219 | 0.686776029 |
| AC174929.1    | 1.977840842 | 0.078592736 | 1.738570742 | 0.045205371 | 0.963943613 | 0.973474141 |
| Gm7222        | 0.80031946  | 0.078561536 | 2.034914048 | 0.038606808 | 0.969203874 | NA          |
| Slc35f6       | 377.2872798 | 0.078485185 | 0.174170234 | 0.45062341  | 0.652260992 | 0.727589177 |
| Cwc27         | 167.6019824 | 0.07840957  | 0.173553006 | 0.451790332 | 0.651420035 | 0.726929447 |
| Ifih1         | 642.6626677 | 0.078076803 | 0.272487854 | 0.286533149 | 0.774469808 | 0.829609924 |
| Ddx41         | 602.0580929 | 0.077941927 | 0.195673577 | 0.398326275 | 0.690389695 | 0.760124226 |
| Ppp1cb        | 1873.468898 | 0.077835914 | 0.20828881  | 0.37369225  | 0.708633292 | 0.774657285 |
| Pigv          | 203.3168665 | 0.07776272  | 0.344319839 | 0.225844438 | 0.821322414 | 0.866561735 |
| Gm3650        | 59.32940802 | 0.077759969 | 0.337670003 | 0.230283911 | 0.817871162 | 0.863936276 |
| Rap2a         | 394.3344023 | 0.077739875 | 0.211858336 | 0.366942723 | 0.713661743 | 0.778706182 |
| Ints1         | 541.2417216 | 0.077524054 | 0.201012674 | 0.385667494 | 0.69974294  | 0.767942426 |
| Pcyt1a        | 1147.311069 | 0.077365913 | 0.233968118 | 0.330668614 | 0.740894812 | 0.801903039 |
| Dstn          | 3658.631027 | 0.07734098  | 0.162185208 | 0.476868271 | 0.633455927 | 0.711631134 |
| Rpl34         | 2511.33349  | 0.076952785 | 0.185517733 | 0.414800159 | 0.678288203 | 0.749559687 |
| Ostf1         | 723.8079719 | 0.076887472 | 0.14504545  | 0.530092272 | 0.596047957 | 0.678695269 |
| Tmem248       | 1076.157331 | 0.07667314  | 0.200662717 | 0.38209958  | 0.702387504 | 0.769775869 |
| Rnf31         | 403.5430126 | 0.076589907 | 0.267361336 | 0.286465904 | 0.774521304 | 0.829609924 |
| Zfp607b       | 18.11665461 | 0.076578021 | 0.830668992 | 0.09218837  | 0.926548378 | 0.945794742 |
| Hectd4        | 590.3329504 | 0.076529937 | 0.207931861 | 0.368052961 | 0.712833744 | 0.778001899 |
| Ilk           | 1403.134477 | 0.076283667 | 0.110896087 | 0.687884215 | 0.491525698 | 0.581427289 |
| Dapk3         | 406.5811285 | 0.076275483 | 0.179036743 | 0.426032565 | 0.670084117 | 0.742659864 |
| Mak16         | 342.8266566 | 0.076261383 | 0.14545142  | 0.524308276 | 0.600064142 | 0.682030159 |
| Mfsd13a       | 119.4185603 | 0.076116237 | 0.203529634 | 0.373981101 | 0.708418377 | 0.774472007 |
| 9330159F19Rik | 2.977120581 | 0.076001245 | 1.092084292 | 0.069592838 | 0.944517738 | 0.959545819 |
| Pdxk-ps       | 1.972083011 | 0.075654143 | 1.27283595  | 0.059437466 | 0.952603672 | 0.965344315 |
| Ppm1g         | 802.3477773 | 0.075621601 | 0.192375375 | 0.393093976 | 0.694250073 | 0.763437738 |
| Dimt1         | 105.1684019 | 0.07551822  | 0.242792775 | 0.311039816 | 0.755770353 | 0.814075503 |
| Ubap2l        | 1326.031192 | 0.07527926  | 0.176329405 | 0.426924027 | 0.669434664 | 0.742133057 |
| Zfp120        | 168.5032005 | 0.075219132 | 0.185999316 | 0.404405421 | 0.685914614 | 0.756320571 |
| Tab3          | 160.7744631 | 0.075189291 | 0.231369163 | 0.324975422 | 0.745199673 | 0.805080103 |
| Mbd2          | 1119.47155  | 0.075179543 | 0.210386787 | 0.357339661 | 0.720837542 | 0.7849785   |
| Rnh1          | 1715.505922 | 0.075138313 | 0.142274253 | 0.52812305  | 0.597413933 | 0.679932755 |
| Zfp622        | 557.6795738 | 0.074868411 | 0.191432995 | 0.391094604 | 0.695727309 | 0.764618306 |
| Sdc2          | 3737.500821 | 0.074556287 | 0.155288527 | 0.480114585 | 0.631145918 | 0.709513723 |
| Trp53rkb      | 43.5847548  | 0.074161084 | 0.359433559 | 0.206327658 | 0.836534975 | 0.878317932 |
| Hook2         | 876.4536642 | 0.073981022 | 0.227425714 | 0.325297524 | 0.744955904 | 0.804867752 |
| Fam160a2      | 492.4061949 | 0.073899382 | 0.210440727 | 0.351164831 | 0.725464693 | 0.789160419 |
| Hps6          | 85.55702045 | 0.073809166 | 0.224287652 | 0.329082609 | 0.742093248 | 0.802588701 |
| Bag5          | 274.3143727 | 0.073764597 | 0.219338298 | 0.336305141 | 0.736640774 | 0.798363122 |
| Ostm1         | 288.044331  | 0.073559348 | 0.158190963 | 0.46500348  | 0.641928964 | 0.718849816 |
| Zmynd11       | 1161.313099 | 0.073558164 | 0.178950629 | 0.411052836 | 0.681033792 | 0.752008815 |
| Cdc37         | 1497.784616 | 0.073381233 | 0.199123215 | 0.368521738 | 0.712484239 | 0.777769822 |
| Mlh1          | 316.3958914 | 0.073255691 | 0.260111238 | 0.281632165 | 0.778225574 | 0.832216132 |
| Gtf2i         | 1752.416285 | 0.073241745 | 0.1914332   | 0.382596881 | 0.702018684 | 0.769449307 |
| Cbwd1         | 103.2088256 | 0.073142084 | 0.228030635 | 0.320755517 | 0.748395672 | 0.807643724 |
| Rab7          | 3612.147124 | 0.072592868 | 0.111311394 | 0.65216026  | 0.514297794 | 0.603117431 |
| Cntrob        | 204.7914096 | 0.07256044  | 0.275345195 | 0.263525355 | 0.792145683 | 0.843346007 |
| Prepl         | 389.2122226 | 0.072445403 | 0.185695914 | 0.390129225 | 0.696440993 | 0.765184934 |
| Ampd2         | 608.0851895 | 0.072393825 | 0.241054673 | 0.300321185 | 0.763932175 | 0.820369022 |
| Zfp955b       | 49.03281784 | 0.072339315 | 0.279674986 | 0.258654933 | 0.795901495 | 0.846234794 |
| Utp15         | 219.036786  | 0.072272746 | 0.194718898 | 0.37116452  | 0.710514997 | 0.776266321 |
| Ywhag         | 1633.576479 | 0.072122622 | 0.147961912 | 0.487440459 | 0.625946228 | 0.70510181  |
| Pknox1        | 225.5390147 | 0.071988602 | 0.225337193 | 0.31947057  | 0.749369705 | 0.808406931 |
| Ulk3          | 294.7949217 | 0.071886819 | 0.181071541 | 0.39700783  | 0.691361687 | 0.760899551 |
| Zfp1          | 186.7399796 | 0.07175005  | 0.187962819 | 0.381724699 | 0.702665578 | 0.769960328 |
| Cnax          | 5357.623787 | 0.071695806 | 0.209607696 | 0.342047584 | 0.732315083 | 0.794837176 |
| Nsa2          | 1287.238338 | 0.071563646 | 0.154979262 | 0.461762724 | 0.644251485 | 0.72068237  |
| Soat2         | 1085.271629 | 0.071527462 | 0.221338212 | 0.323159119 | 0.74657474  | 0.806137821 |
| Olfr518       | 2.690036732 | 0.071292642 | 1.14293928  | 0.062376579 | 0.950262946 | 0.963659669 |
| Ppia          | 10396.1932  | 0.071087201 | 0.143458441 | 0.495524701 | 0.62022979  | 0.699687498 |
| Cetn3         | 384.4094842 | 0.070855445 | 0.216971302 | 0.326565975 | 0.743996182 | 0.804088672 |

|               |             |             |             |             |             |             |
|---------------|-------------|-------------|-------------|-------------|-------------|-------------|
| Bcas2         | 496.870018  | 0.07048699  | 0.152220416 | 0.463058716 | 0.64332228  | 0.719973625 |
| Gm38699       | 6.615466334 | 0.070385752 | 0.876963005 | 0.0802608   | 0.936029835 | 0.95279655  |
| Mpdz          | 489.2904809 | 0.069984877 | 0.233522139 | 0.299692685 | 0.764411579 | 0.820686983 |
| Xpnp1         | 584.9204917 | 0.069834726 | 0.18160572  | 0.384540345 | 0.700577999 | 0.768562016 |
| Zfp148        | 590.0089465 | 0.069748567 | 0.1494498   | 0.466702314 | 0.640712874 | 0.717854435 |
| Sdf2          | 567.8394191 | 0.069588116 | 0.139776327 | 0.497853373 | 0.618587393 | 0.698481778 |
| Seh1l         | 752.7368487 | 0.069486662 | 0.14674143  | 0.47353131  | 0.635834168 | 0.713325935 |
| Ppp1ca        | 2319.693371 | 0.06948114  | 0.161431594 | 0.430406085 | 0.66690027  | 0.739900807 |
| Pycl          | 475.8740008 | 0.069463892 | 0.168421753 | 0.412440142 | 0.680016846 | 0.751086228 |
| Thap4         | 315.324646  | 0.069417019 | 0.168653464 | 0.411595569 | 0.68063588  | 0.71666805  |
| Lef1          | 12.04918191 | 0.069294111 | 0.689272473 | 0.100532247 | 0.919921783 | 0.940837876 |
| Irgm1         | 1149.962397 | 0.069236726 | 0.205217693 | 0.337381856 | 0.735829061 | 0.79763552  |
| Slc28a3       | 5.327733993 | 0.069145456 | 0.828179236 | 0.083490931 | 0.933461188 | 0.950635982 |
| Bnpl          | 2.641697794 | 0.068644544 | 1.096362994 | 0.062611147 | 0.950076153 | 0.963604125 |
| Vmn2r-ps114   | 3.637058452 | 0.068589697 | 0.998858808 | 0.06866806  | 0.945253842 | 0.960121991 |
| Spsb4         | 96.24512408 | 0.068318019 | 0.560356919 | 0.121918756 | 0.902963361 | 0.928675156 |
| Coq4          | 140.8197963 | 0.068268658 | 0.247069387 | 0.276313707 | 0.782307129 | 0.835427959 |
| Ppp1r16a      | 651.4077311 | 0.068034261 | 0.20169854  | 0.337306661 | 0.735885739 | 0.797646241 |
| Snmndc1       | 402.3182509 | 0.067996591 | 0.168993114 | 0.402363089 | 0.687416831 | 0.757682946 |
| Kdm6a         | 375.3569605 | 0.067964517 | 0.18549162  | 0.36640209  | 0.71406506  | 0.779046534 |
| Klra5         | 0.517571172 | 0.067736833 | 2.959861851 | 0.022885133 | 0.981741899 | NA          |
| Gen1          | 56.42192337 | 0.067731283 | 0.380788216 | 0.177871268 | 0.858824076 | 0.895433481 |
| 9530050K03Rik | 7.260382142 | 0.067654704 | 0.723795807 | 0.093472085 | 0.925528525 | 0.944967526 |
| Hexa          | 781.773174  | 0.067198231 | 0.290932858 | 0.230975047 | 0.817334187 | 0.86363662  |
| 6820431F20Rik | 2068.454453 | 0.067167108 | 0.133919213 | 0.501549454 | 0.615984483 | 0.69624221  |
| Pax6          | 4.784630083 | 0.067115771 | 1.198826863 | 0.055984541 | 0.955354123 | 0.967326548 |
| Ccdc85b       | 133.2138802 | 0.066842028 | 0.187852257 | 0.355822333 | 0.721973623 | 0.786014836 |
| Spag9         | 1491.173878 | 0.066761877 | 0.159733746 | 0.417957247 | 0.675978376 | 0.747561334 |
| Pik3c2a       | 621.5211588 | 0.066505601 | 0.178432158 | 0.372722056 | 0.709355319 | 0.775347149 |
| Mtmr10        | 614.0749105 | 0.066457919 | 0.207606579 | 0.320114706 | 0.748881378 | 0.807956723 |
| Cfcf2         | 133.1760214 | 0.066294759 | 0.291255814 | 0.227616946 | 0.819944045 | 0.86553929  |
| Ube2v2        | 469.8115006 | 0.066287121 | 0.219334124 | 0.302219827 | 0.762484491 | 0.819237133 |
| Gm10642       | 17.08018109 | 0.066054686 | 0.524060703 | 0.126043959 | 0.899697128 | 0.926154015 |
| Mroh7         | 11.64404944 | 0.065889396 | 0.763702229 | 0.086276292 | 0.931246784 | 0.949383126 |
| D630023F18Rik | 1.649141632 | 0.065759773 | 1.504440912 | 0.043710439 | 0.965135218 | 0.974221398 |
| Ttpal         | 366.5962134 | 0.065718047 | 0.215476388 | 0.304989553 | 0.760374109 | 0.817658748 |
| Haus7         | 308.3230906 | 0.065645724 | 0.243169866 | 0.2699583   | 0.787192334 | 0.839173019 |
| Zdhhc5        | 1217.582939 | 0.065370684 | 0.214637779 | 0.304562804 | 0.760699153 | 0.817739293 |
| Pcgf6         | 265.4114067 | 0.065225612 | 0.184321038 | 0.353869599 | 0.723436611 | 0.787255672 |
| 3110009E18Rik | 14.82847914 | 0.065203221 | 0.484311816 | 0.134630664 | 0.892903896 | 0.921468364 |
| Gm17018       | 117.4793961 | 0.064971653 | 0.196395839 | 0.330819905 | 0.740780524 | 0.801830246 |
| Cyp26a1       | 380.74703   | 0.064946555 | 0.71563007  | 0.090754369 | 0.927687769 | 0.946565782 |
| Gm15760       | 1.371221603 | 0.064912217 | 2.076748885 | 0.031256652 | 0.97506486  | NA          |
| Wdr77         | 646.997562  | 0.064868883 | 0.226646668 | 0.286211502 | 0.774716135 | 0.829609924 |
| Dhx40         | 713.9611004 | 0.064859718 | 0.149366288 | 0.434232644 | 0.66411951  | 0.737577136 |
| Ppil3         | 212.2991679 | 0.064629467 | 0.206516856 | 0.312950082 | 0.754318587 | 0.812665778 |
| Fcsk          | 292.1516863 | 0.064591018 | 0.216919812 | 0.297764492 | 0.765882917 | 0.821956057 |
| ltpa          | 499.3611054 | 0.064248055 | 0.194851877 | 0.32972767  | 0.741605744 | 0.802265037 |
| Zfp335        | 424.2339387 | 0.064241226 | 0.187163464 | 0.343235934 | 0.731420974 | 0.794119524 |
| Ubox5         | 136.4883775 | 0.064231864 | 0.204854135 | 0.313549266 | 0.753863397 | 0.812329385 |
| Ifi203-ps     | 37.72197937 | 0.064106081 | 0.492586772 | 0.130141703 | 0.896454316 | 0.924043363 |
| Cops4         | 499.5509994 | 0.063715053 | 0.15526327  | 0.410367842 | 0.681536133 | 0.752417303 |
| Ccdc12        | 480.0453227 | 0.063022462 | 0.200183284 | 0.3148238   | 0.75289544  | 0.811440224 |
| Fyttd1        | 641.213346  | 0.062829006 | 0.146300748 | 0.429451023 | 0.667595029 | 0.740478859 |
| Zdhhc12       | 362.0137087 | 0.062733432 | 0.211490804 | 0.296624868 | 0.766752923 | 0.8226826   |
| Szt2          | 509.7342875 | 0.062452668 | 0.263752007 | 0.236785566 | 0.812823149 | 0.860042766 |
| Met           | 1121.676165 | 0.062161648 | 0.141434889 | 0.439507173 | 0.660294086 | 0.734723163 |
| Borcs6        | 184.470656  | 0.062153428 | 0.190765376 | 0.325810841 | 0.744567476 | 0.80449907  |
| Snrpc         | 496.5698545 | 0.06186215  | 0.145863536 | 0.424109761 | 0.671485768 | 0.743692291 |
| Bag3          | 472.3525412 | 0.061829533 | 0.169443557 | 0.364897516 | 0.715187909 | 0.78001615  |
| Rragc         | 679.2779594 | 0.061522811 | 0.1324329   | 0.464558357 | 0.642247759 | 0.719106738 |
| Rsl1d1        | 932.865088  | 0.061392474 | 0.121455517 | 0.505472912 | 0.61322672  | 0.693807348 |
| A330044P14Rik | 5.71956098  | 0.061359593 | 0.844721892 | 0.07263881  | 0.942093542 | 0.957425378 |
| Fam3c         | 453.9100762 | 0.061124509 | 0.205430446 | 0.297543573 | 0.766051547 | 0.822085281 |
| Jak1          | 1802.751717 | 0.061092212 | 0.172417185 | 0.354327862 | 0.723093189 | 0.786932186 |
| Ncln          | 1144.455235 | 0.061083127 | 0.156492172 | 0.390327047 | 0.696294726 | 0.765093941 |

|               |             |             |             |             |             |             |
|---------------|-------------|-------------|-------------|-------------|-------------|-------------|
| Psmg2         | 319.1283703 | 0.060669169 | 0.193711562 | 0.313193331 | 0.754133785 | 0.812518028 |
| Sox17         | 59.13401675 | 0.060658434 | 0.273564684 | 0.221733425 | 0.824521408 | 0.869452648 |
| Mat2b         | 748.7849448 | 0.060604562 | 0.132254829 | 0.458240829 | 0.64677943  | 0.722846186 |
| Rbx1          | 968.2314985 | 0.060598097 | 0.159650607 | 0.159656698 | 0.704266885 | 0.770922168 |
| Gm12258       | 75.06615048 | 0.060391408 | 0.359479575 | 0.16799677  | 0.86658582  | 0.901494843 |
| Thoc5         | 329.6246256 | 0.059964607 | 0.199421667 | 0.300692539 | 0.763648959 | 0.82017813  |
| Fbrsl1        | 670.7304313 | 0.059940694 | 0.21413622  | 0.279918523 | 0.779540016 | 0.833308138 |
| Pnma2         | 3.008514261 | 0.059746921 | 1.259290568 | 0.047444905 | 0.96215864  | 0.972483577 |
| Mapk1         | 1378.773722 | 0.059725492 | 0.120433323 | 0.495921648 | 0.619949692 | 0.699464087 |
| Ubiad1        | 173.0229456 | 0.059616601 | 0.263112268 | 0.226582368 | 0.820748504 | 0.866063413 |
| Ube2m         | 1160.303607 | 0.059285887 | 0.13968063  | 0.424438856 | 0.671245789 | 0.743608955 |
| Brpf1         | 587.826692  | 0.059252065 | 0.181816349 | 0.325889641 | 0.744507853 | 0.804485636 |
| Rhod          | 620.2439738 | 0.059148908 | 0.175255862 | 0.337500308 | 0.73573978  | 0.797589455 |
| Srp14         | 757.6172754 | 0.0590401   | 0.121188274 | 0.487176671 | 0.626133136 | 0.705180531 |
| Zfp507        | 370.7322359 | 0.058998546 | 0.241176617 | 0.244627967 | 0.806744507 | 0.855522524 |
| Tarsl2        | 183.3585839 | 0.058574168 | 0.18513572  | 0.316385016 | 0.751710289 | 0.810367839 |
| Eps15l1       | 480.9105142 | 0.058475947 | 0.161863144 | 0.361267832 | 0.717899238 | 0.782378458 |
| Hars          | 677.9893673 | 0.0583999   | 0.16473073  | 0.354517339 | 0.722951212 | 0.786827902 |
| Luc7l3        | 1760.919601 | 0.058101501 | 0.168990529 | 0.343815134 | 0.730985318 | 0.79369707  |
| Exos8         | 291.2457128 | 0.058009678 | 0.1596447   | 0.36336739  | 0.716330459 | 0.780868448 |
| 4930404N11Rik | 1.08308607  | 0.057970893 | 2.013278382 | 0.028794276 | 0.977028666 | NA          |
| Trim8         | 766.1917262 | 0.057786404 | 0.186748114 | 0.309435008 | 0.756990644 | 0.814926528 |
| Prkar1a       | 2637.591906 | 0.057761459 | 0.121406566 | 0.475768828 | 0.63423908  | 0.712286419 |
| Fbl           | 811.2688739 | 0.057316607 | 0.167465979 | 0.342258216 | 0.732156578 | 0.794715735 |
| Rb1           | 209.6364341 | 0.057056205 | 0.18794907  | 0.30357269  | 0.761453346 | 0.818387252 |
| Rprd1b        | 464.2714549 | 0.056930349 | 0.216805124 | 0.262587652 | 0.792868418 | 0.843904651 |
| Fign          | 101.1356081 | 0.056878945 | 0.435003421 | 0.130755167 | 0.89596899  | 0.923710652 |
| Zcchc10       | 75.65638003 | 0.056626513 | 0.231939215 | 0.244143765 | 0.807119478 | 0.855813712 |
| Arih1         | 822.1564375 | 0.056560908 | 0.153335075 | 0.368871299 | 0.712223657 | 0.777624333 |
| Fmr1          | 430.3557238 | 0.056364318 | 0.260993114 | 0.215960938 | 0.829018196 | 0.873012988 |
| Mbnl3         | 31.84045924 | 0.056330585 | 0.573003523 | 0.098307572 | 0.921688066 | 0.942022671 |
| Psenen-ps     | 12.68093625 | 0.056107962 | 1.116179963 | 0.050267845 | 0.959908947 | 0.970900488 |
| Agbl1         | 0.838169497 | 0.056076721 | 1.900151752 | 0.029511707 | 0.976456482 | NA          |
| Trip11        | 574.1912423 | 0.056038672 | 0.146856259 | 0.381588582 | 0.702766554 | 0.769961    |
| Erlec1        | 520.8058428 | 0.055980797 | 0.157847143 | 0.354651951 | 0.722850352 | 0.786768358 |
| Wdr3          | 357.3893814 | 0.055661952 | 0.201685767 | 0.275983543 | 0.782560706 | 0.835646409 |
| Cep135        | 112.6844555 | 0.05562266  | 0.282086355 | 0.197183091 | 0.843684262 | 0.883701726 |
| Gm5643        | 0.794016977 | 0.055409007 | 2.067306356 | 0.026802514 | 0.978617248 | NA          |
| Eri2          | 131.2425189 | 0.055307233 | 0.296722302 | 0.18639392  | 0.85213586  | 0.890584364 |
| Cep78         | 48.75472982 | 0.055300297 | 0.333612315 | 0.165762158 | 0.868344128 | 0.902874523 |
| Slc39a14      | 4294.336748 | 0.055120531 | 0.220071842 | 0.250466078 | 0.802226935 | 0.852003787 |
| Ccdc61        | 144.5574596 | 0.054922664 | 0.231821291 | 0.236918118 | 0.812720314 | 0.859987332 |
| Ctsa          | 3347.141946 | 0.054921271 | 0.168406953 | 0.326122346 | 0.744331791 | 0.804346372 |
| Smg8          | 172.8239613 | 0.054155433 | 0.260114187 | 0.208198692 | 0.83507383  | 0.877161963 |
| Acp2          | 1129.833928 | 0.05374287  | 0.196848461 | 0.273016462 | 0.784840561 | 0.837399041 |
| Samd15        | 3.12566247  | 0.053484788 | 1.175231939 | 0.045509985 | 0.963700816 | 0.973407484 |
| Gm14267       | 8.458172107 | 0.053470454 | 0.602352909 | 0.088769313 | 0.929265246 | 0.9478331   |
| Rpusd4        | 142.0360514 | 0.05341207  | 0.236936113 | 0.225428153 | 0.821646212 | 0.866796078 |
| Ptprb         | 524.513541  | 0.053235029 | 0.291417367 | 0.182676239 | 0.85505206  | 0.89270179  |
| Nfat5         | 1431.173137 | 0.053234397 | 0.186956827 | 0.284741656 | 0.775842074 | 0.830448652 |
| Crybg2        | 59.13017706 | 0.053221611 | 0.452690406 | 0.117567348 | 0.906410478 | 0.931045749 |
| Cd79b         | 26.32761585 | 0.053022213 | 0.433453254 | 0.122325101 | 0.902641553 | 0.928512231 |
| Tmem184a      | 410.4422734 | 0.052894809 | 0.298621469 | 0.177129959 | 0.85940631  | 0.895722037 |
| Rnf4          | 1280.158587 | 0.052721041 | 0.176164495 | 0.29927166  | 0.764732776 | 0.820939573 |
| Asf1a         | 190.1623854 | 0.052673356 | 0.188410457 | 0.279567055 | 0.779809686 | 0.833439629 |
| E430018J23Rik | 121.8796094 | 0.052108298 | 0.348112552 | 0.149688077 | 0.881010715 | 0.912593916 |
| Mitd1         | 217.66482   | 0.051992931 | 0.185721525 | 0.279951025 | 0.77951508  | 0.833308138 |
| Klra4         | 1.794558108 | 0.051545122 | 1.484685182 | 0.03471788  | 0.972304703 | 0.979776013 |
| Slc9a1        | 276.892701  | 0.051457304 | 0.239064504 | 0.215244437 | 0.829576747 | 0.873414739 |
| Adipor1       | 1946.468134 | 0.051349855 | 0.205932125 | 0.249353301 | 0.803087505 | 0.852729461 |
| Slc25a29      | 39.05860434 | 0.051156966 | 0.439764616 | 0.116328062 | 0.907392546 | 0.931781665 |
| Ascc2         | 747.7213247 | 0.051137738 | 0.16638749  | 0.307341245 | 0.758583645 | 0.816229107 |
| Cop1          | 818.4702397 | 0.051035771 | 0.157212073 | 0.324630097 | 0.745461046 | 0.805311445 |
| Bnip3l        | 1347.636863 | 0.05096412  | 0.19659144  | 0.259238753 | 0.795451032 | 0.845966887 |
| Gm17195       | 6.108496282 | 0.050830572 | 0.844308592 | 0.060203784 | 0.951993332 | 0.964897879 |
| Fam98a        | 502.7005821 | 0.050373541 | 0.134268266 | 0.375170859 | 0.707533401 | 0.773752609 |



|               |             |             |             |             |             |             |
|---------------|-------------|-------------|-------------|-------------|-------------|-------------|
| Sec16a        | 2269.809216 | 0.0503603   | 0.247841914 | 0.203195252 | 0.838982424 | 0.880128753 |
| Il11ra2       | 3.26601388  | 0.050024283 | 1.255705059 | 0.039837606 | 0.968222595 | 0.976470587 |
| Snrnp35       | 98.77060126 | 0.049913822 | 0.249110337 | 0.200368329 | 0.841192527 | 0.88172048  |
| Atp8b1        | 757.1029769 | 0.049643627 | 0.134124046 | 0.370132191 | 0.711283998 | 0.776907329 |
| Vezt          | 516.4465167 | 0.049594244 | 0.177350651 | 0.279639478 | 0.779754116 | 0.833432487 |
| Mpi           | 218.2439701 | 0.049421364 | 0.189607145 | 0.260651382 | 0.794361362 | 0.845170551 |
| Asb8          | 386.4499305 | 0.049321468 | 0.146420668 | 0.336847718 | 0.736231699 | 0.797970501 |
| Gm2451        | 1.214875594 | 0.049187048 | 2.071465547 | 0.023745048 | 0.981055973 | NA          |
| Erp29         | 1112.316847 | 0.049111248 | 0.171472765 | 0.286408444 | 0.774565308 | 0.829609924 |
| Olfr531       | 0.97893483  | 0.048996747 | 1.696355074 | 0.028883544 | 0.97695747  | NA          |
| lkbkg         | 1968.702095 | 0.048971067 | 0.208190915 | 0.235221921 | 0.814036492 | 0.861059386 |
| Abhd4         | 949.8720895 | 0.048479992 | 0.181885014 | 0.266541982 | 0.789821832 | 0.841344525 |
| Stag1         | 414.8306235 | 0.048350316 | 0.183960563 | 0.262829791 | 0.792681773 | 0.843811356 |
| Ecd           | 471.1233253 | 0.047981231 | 0.130349283 | 0.36809739  | 0.712800617 | 0.778001899 |
| Supt16        | 700.5691449 | 0.04796309  | 0.145981621 | 0.328555677 | 0.742491554 | 0.802866676 |
| Baz2a         | 1260.017259 | 0.047849597 | 0.119212901 | 0.401379355 | 0.688140847 | 0.758382905 |
| Sp3           | 868.1707799 | 0.047633255 | 0.148209137 | 0.321392162 | 0.747913222 | 0.807346585 |
| Smpd4         | 365.8886941 | 0.047439511 | 0.167822978 | 0.282675897 | 0.777425295 | 0.831651056 |
| Klh18         | 68.64813874 | 0.047256368 | 0.32799577  | 0.14407615  | 0.885440337 | 0.916099938 |
| Raver2        | 1.789513932 | 0.047176079 | 1.236912577 | 0.038140189 | 0.969575909 | 0.977488474 |
| O610010K14Rik | 250.2936367 | 0.047012442 | 0.205735454 | 0.22850919  | 0.819250413 | 0.865018025 |
| Rraga         | 529.443415  | 0.046928693 | 0.152579388 | 0.307569019 | 0.758410297 | 0.816094095 |
| Fxr1          | 894.6531366 | 0.046780372 | 0.18761067  | 0.249348141 | 0.803091496 | 0.852729461 |
| Mtpn          | 1824.423012 | 0.046595266 | 0.174088437 | 0.26765285  | 0.788966592 | 0.840748949 |
| Actr2         | 1965.88751  | 0.046569661 | 0.133711749 | 0.348283985 | 0.72762692  | 0.791007762 |
| Zfp551        | 16.6381274  | 0.046505034 | 0.583835775 | 0.079654307 | 0.936512202 | 0.953230641 |
| Zbtb24        | 289.5458267 | 0.046274682 | 0.149027214 | 0.310511625 | 0.756171921 | 0.814250815 |
| Ppat          | 315.5460958 | 0.04610973  | 0.281826245 | 0.163610491 | 0.870037786 | 0.903863752 |
| Srp68         | 992.1447239 | 0.045966933 | 0.195335864 | 0.235322549 | 0.813958395 | 0.861030201 |
| Rictor        | 688.1371463 | 0.045831011 | 0.198570044 | 0.230805264 | 0.817466092 | 0.863722462 |
| Trp53inp1     | 1854.331559 | 0.045827893 | 0.225816815 | 0.202942781 | 0.839179755 | 0.880270057 |
| Cry2          | 560.2957166 | 0.045702708 | 0.292969447 | 0.155998207 | 0.876034434 | 0.908819755 |
| Slc25a27      | 167.7172393 | 0.045531714 | 0.218681921 | 0.208209778 | 0.835065174 | 0.877161963 |
| Gm49369       | 12.99930685 | 0.045415236 | 0.614170291 | 0.073945673 | 0.941053613 | 0.956596625 |
| Mpg           | 297.5444954 | 0.045312006 | 0.142543285 | 0.317882432 | 0.750574119 | 0.809347728 |
| Kank1         | 1073.110141 | 0.045055765 | 0.175208791 | 0.257154705 | 0.797059348 | 0.847043247 |
| Mrpl3         | 375.2196319 | 0.044837195 | 0.14992696  | 0.299060253 | 0.764894072 | 0.821049877 |
| Gm8125        | 2.073775495 | 0.044828458 | 1.53054402  | 0.029289232 | 0.976633915 | 0.982918412 |
| Nr5a2         | 916.7267924 | 0.044780545 | 0.185721012 | 0.24111728  | 0.809464221 | 0.857553196 |
| Bmp5          | 128.9014296 | 0.044672381 | 0.286813829 | 0.15575393  | 0.876226986 | 0.9089642   |
| Sap130        | 536.2932512 | 0.044644149 | 0.146444035 | 0.304854678 | 0.760476835 | 0.817658748 |
| Vamp4         | 222.3835284 | 0.044563843 | 0.184205038 | 0.241925211 | 0.808838114 | 0.857102945 |
| Ankle2        | 510.8902632 | 0.044511449 | 0.241387554 | 0.184398276 | 0.853701022 | 0.891728143 |
| Gm10327       | 6.962260836 | 0.044406858 | 0.754656486 | 0.058843804 | 0.953076519 | 0.965651283 |
| Ltn1          | 627.2430669 | 0.044247801 | 0.133144636 | 0.332328829 | 0.739640973 | 0.800800159 |
| Slc30a6       | 226.6582    | 0.044202912 | 0.171185566 | 0.258216348 | 0.796239942 | 0.846436274 |
| Ep400         | 890.5211477 | 0.043834945 | 0.267749032 | 0.163716538 | 0.869954298 | 0.903832096 |
| B4galnt1      | 1866.827753 | 0.043770004 | 0.158902453 | 0.275452034 | 0.782968973 | 0.835925291 |
| Eif3e         | 1786.175087 | 0.043626866 | 0.112202359 | 0.388823074 | 0.697407031 | 0.765828502 |
| Gm5417        | 17.30217598 | 0.043198857 | 0.481199365 | 0.089773305 | 0.928467362 | 0.947247851 |
| Crppa         | 32.85985896 | 0.043122374 | 0.391520915 | 0.110140666 | 0.912297818 | 0.935453699 |
| Fance         | 212.0187656 | 0.042916672 | 0.247996581 | 0.173053481 | 0.86260939  | 0.898336278 |
| Gatad2a       | 1094.285663 | 0.042685424 | 0.121634006 | 0.350933306 | 0.725638384 | 0.789298997 |
| Myd88         | 366.7060715 | 0.042475209 | 0.18121698  | 0.234388682 | 0.814683245 | 0.861476241 |
| Dctn5         | 563.8285228 | 0.042147847 | 0.169347713 | 0.248883475 | 0.803450918 | 0.852984883 |
| Cend1         | 1.061979434 | 0.041818895 | 1.812146193 | 0.023076998 | 0.981588853 | NA          |
| Pwp2          | 295.0433545 | 0.041794583 | 0.167665147 | 0.249274129 | 0.803148742 | 0.852729461 |
| Ubxn2a        | 316.4720302 | 0.041702564 | 0.202189953 | 0.206254384 | 0.836592209 | 0.87832393  |
| Exosc2        | 276.2707585 | 0.041684999 | 0.227593611 | 0.1831554   | 0.854676088 | 0.89247323  |
| Fbxl3         | 811.7279111 | 0.04141351  | 0.146282333 | 0.283106711 | 0.777095037 | 0.831580955 |
| Acap1         | 71.72445364 | 0.041379543 | 0.378785775 | 0.1092426   | 0.913010073 | 0.935950221 |
| Nsmaf         | 467.5386532 | 0.041331579 | 0.194240615 | 0.212785459 | 0.831494306 | 0.874425694 |
| Ptar1         | 31.94150369 | 0.041135853 | 0.487643106 | 0.084356473 | 0.932773013 | 0.950325727 |
| Zfp410        | 445.5071953 | 0.040345954 | 0.207515378 | 0.194423925 | 0.845843958 | 0.885474228 |
| Snrnp70       | 3693.277328 | 0.040317868 | 0.135379643 | 0.297813372 | 0.765845608 | 0.821956057 |
| Foxj3         | 328.1852743 | 0.040225284 | 0.18732358  | 0.214736896 | 0.829972455 | 0.8735797   |

|               |             |             |             |             |                |             |
|---------------|-------------|-------------|-------------|-------------|----------------|-------------|
| Ppp1r12c      | 723.5448096 | 0.040180974 | 0.155580553 | 0.258264759 | 0.796202582    | 0.846436274 |
| Taf11         | 246.7478248 | 0.040057852 | 0.187368461 | 0.21379186  | 0.830709373    | 0.873923689 |
| Trim45        | 22.69623404 | 0.039960285 | 0.450857587 | 0.088631724 | 0.929374595    | 0.9478331   |
| Tsc22d2       | 429.3004412 | 0.039730198 | 0.267765235 | 0.148376985 | 0.882045262    | 0.913221646 |
| Smarca5       | 759.1410188 | 0.039520133 | 0.165162739 | 0.239279954 | 0.810888508    | 0.85868857  |
| Zxdc          | 237.9493001 | 0.039383825 | 0.187878098 | 0.209624353 | 0.833960871    | 0.876424912 |
| Rrn3          | 379.8191204 | 0.039206661 | 0.15317108  | 0.255966141 | 0.797976982    | 0.847965567 |
| Pcnx          | 581.0721302 | 0.039075415 | 0.317444958 | 0.123093514 | 0.902033047    | 0.928176478 |
| Ldlrap1       | 534.6864899 | 0.039047302 | 0.320177619 | 0.121955127 | 0.902934556    | 0.928675156 |
| Nme4          | 62.3801173  | 0.038740225 | 0.287820342 | 0.134598633 | 0.892929222    | 0.921468364 |
| 1700030J22Rik | 5.312748233 | 0.038217024 | 0.889937473 | 0.042943493 | 0.965746578    | 0.974665384 |
| Camsap3       | 572.6211617 | 0.038047595 | 0.211193819 | 0.180154868 | 0.857030989    | 0.89405607  |
| Gm46209       | 1.401061773 | 0.037680324 | 1.77454041  | 0.021233849 | 0.983059112 NA |             |
| Becn1         | 1190.455113 | 0.037667597 | 0.173216437 | 0.217459715 | 0.827850098    | 0.872045754 |
| Gm50364       | 3.98642478  | 0.037661597 | 2.228933995 | 0.016896686 | 0.986519037    | 0.990294797 |
| Polr3k        | 337.5833287 | 0.037588921 | 0.188902662 | 0.198985659 | 0.842273962    | 0.882658379 |
| Cdkl1         | 6.627980743 | 0.037581818 | 0.733332666 | 0.05124798  | 0.959127919    | 0.970433647 |
| Tsga10        | 28.5306916  | 0.03750819  | 0.352255172 | 0.10648017  | 0.915201388    | 0.937290001 |
| Gm20075       | 32.14041417 | 0.037493179 | 1.727789804 | 0.021700081 | 0.982687199    | 0.987320331 |
| Rfc1          | 452.7303913 | 0.037257709 | 0.175931136 | 0.211774392 | 0.832283048    | 0.875084724 |
| Fbxl17        | 343.8257618 | 0.03719657  | 0.224052132 | 0.16601748  | 0.868143194    | 0.902734152 |
| Vps51         | 473.8122813 | 0.037089175 | 0.170065953 | 0.218087009 | 0.827361319    | 0.871638597 |
| Spaar         | 13.8282637  | 0.03702807  | 0.701769367 | 0.052763873 | 0.957920046    | 0.969463992 |
| Rbm6          | 724.3620348 | 0.036983414 | 0.18008031  | 0.205371779 | 0.837281668    | 0.878885405 |
| Gm10775       | 4.538193462 | 0.036904723 | 1.05166877  | 0.035091584 | 0.972006713    | 0.979649449 |
| Cars2         | 367.4721165 | 0.036816383 | 0.207774958 | 0.177193553 | 0.859356636    | 0.895722037 |
| Nol6          | 467.9188242 | 0.036751628 | 0.222429628 | 0.165228116 | 0.868764436    | 0.903138648 |
| Gm14391       | 261.7927461 | 0.036549876 | 0.292042099 | 0.125152764 | 0.900402612    | 0.926712372 |
| Fbxl12        | 256.7646526 | 0.036544087 | 0.167274435 | 0.218467853 | 0.827064603    | 0.87137985  |
| Ric8b         | 232.2787008 | 0.036441737 | 0.16122448  | 0.22603104  | 0.821177279    | 0.86646223  |
| Abhd10        | 164.7493677 | 0.036440555 | 0.245000175 | 0.148736853 | 0.881761281    | 0.913038527 |
| Nucks1        | 1591.213767 | 0.03629929  | 0.188284755 | 0.192789318 | 0.847123969    | 0.886542015 |
| Klhdc9        | 1.845587221 | 0.03584929  | 1.419913528 | 0.025247516 | 0.979857537    | 0.985290273 |
| Syt13         | 10.55187322 | 0.035846984 | 0.661658871 | 0.05417744  | 0.956793795    | 0.968494668 |
| Usp36         | 403.0902872 | 0.035702851 | 0.259259628 | 0.137710801 | 0.890468983    | 0.919653191 |
| Eid2b         | 62.39726194 | 0.03567843  | 0.290825003 | 0.122680064 | 0.902360451    | 0.928371724 |
| Stx16         | 997.4680147 | 0.0356286   | 0.153603577 | 0.231951628 | 0.816575585    | 0.86299551  |
| Trafd1        | 1259.759799 | 0.035409861 | 0.133777485 | 0.264692229 | 0.791246564    | 0.842581685 |
| Esco1         | 246.1553652 | 0.035408863 | 0.21468075  | 0.164937299 | 0.868993334    | 0.903219019 |
| 1110004F10Rik | 852.7977716 | 0.034985117 | 0.13115484  | 0.266746672 | 0.789664217    | 0.841261111 |
| Tial1         | 1205.501366 | 0.034905364 | 0.144101162 | 0.242228191 | 0.808603352    | 0.856907437 |
| Cebpg         | 1010.722466 | 0.034379474 | 0.19061204  | 0.1803636   | 0.856867128    | 0.894011619 |
| Prdx2         | 2612.126892 | 0.034329659 | 0.210485645 | 0.163097386 | 0.870441758    | 0.904173232 |
| Dnaaf5        | 179.8422087 | 0.034105857 | 0.254124675 | 0.134209151 | 0.89323719     | 0.92173038  |
| Sh3gl3        | 0.443632346 | 0.033618025 | 3.14574772  | 0.010686815 | 0.991473317 NA |             |
| Epha2         | 488.2642382 | 0.033598907 | 0.242712812 | 0.138430712 | 0.889900026    | 0.919344058 |
| Ccdc71        | 374.8092233 | 0.033152188 | 0.144773521 | 0.228993452 | 0.818874006    | 0.864727704 |
| Fbh1          | 507.5404549 | 0.033026134 | 0.14914966  | 0.221429499 | 0.824758026    | 0.869572919 |
| Pipp6         | 384.4191393 | 0.032937742 | 0.186016305 | 0.177069113 | 0.859454103    | 0.895722037 |
| Tdrd3         | 228.9835105 | 0.032625275 | 0.331468715 | 0.098426408 | 0.921593706    | 0.942022671 |
| Tek           | 117.21266   | 0.032618783 | 0.281838901 | 0.115735559 | 0.907862124    | 0.932194994 |
| Wdr70         | 233.1780772 | 0.032595671 | 0.178066664 | 0.183053189 | 0.854756285    | 0.892502305 |
| Rnf39         | 189.1379866 | 0.032586239 | 0.246566864 | 0.132159847 | 0.89485786     | 0.922846933 |
| Olfr695       | 2.194945841 | 0.03255741  | 1.425948518 | 0.022832108 | 0.981784196    | 0.986587502 |
| Btaf1         | 512.0653686 | 0.032525818 | 0.238515389 | 0.136367797 | 0.89153053     | 0.920359239 |
| Wdr26         | 2115.834184 | 0.03249375  | 0.141519027 | 0.229606933 | 0.818397219    | 0.864438401 |
| Ccdc86        | 219.8291296 | 0.031818397 | 0.220139184 | 0.144537637 | 0.885075938    | 0.915803265 |
| Impdh2        | 820.4718754 | 0.031639644 | 0.156876164 | 0.201685478 | 0.840162616    | 0.880987347 |
| Mon1b         | 181.6196666 | 0.031228378 | 0.171615616 | 0.181966994 | 0.855608629    | 0.892900092 |
| MF597746.1    | 2.082273957 | 0.031107954 | 1.656481712 | 0.018779534 | 0.985016981    | 0.989252989 |
| Anapc16       | 565.129562  | 0.03107788  | 0.163769841 | 0.189765588 | 0.849492822    | 0.888484545 |
| Asb5          | 1.076697831 | 0.031072848 | 1.987053691 | 0.015637649 | 0.98752347 NA  |             |
| Fbxo47        | 5.329115665 | 0.030925813 | 0.924454706 | 0.033453032 | 0.97331332     | 0.98061849  |
| Ncbp3         | 303.6134142 | 0.030864409 | 0.16450728  | 0.187617284 | 0.851176676    | 0.890004918 |
| Rps19bp1      | 283.0639435 | 0.030793468 | 0.160774669 | 0.191531838 | 0.848108939    | 0.887246023 |
| Kmt2b         | 927.507926  | 0.03063999  | 0.190099367 | 0.161178814 | 0.871952567    | 0.905080819 |

|               |             |             |             |             |                |             |
|---------------|-------------|-------------|-------------|-------------|----------------|-------------|
| Pfkfb2        | 477.1590131 | 0.03061191  | 0.34088272  | 0.089801883 | 0.928444652    | 0.947247851 |
| Calm1         | 3584.089096 | 0.030430189 | 0.167797883 | 0.181350255 | 0.856092662    | 0.893329203 |
| Vmn2r57       | 1.185072528 | 0.030041538 | 2.107724174 | 0.014253069 | 0.988628081 NA |             |
| Myk           | 2482.479119 | 0.03002906  | 0.253480099 | 0.118467133 | 0.905697536    | 0.930532851 |
| Ncbp1         | 415.5821457 | 0.029998209 | 0.16419511  | 0.182698553 | 0.855034551    | 0.89270179  |
| Smpdl3a       | 549.4633796 | 0.029994688 | 0.184550004 | 0.162528783 | 0.870889464    | 0.90452806  |
| Smc1a         | 1004.882936 | 0.029951581 | 0.184901202 | 0.161986947 | 0.871316133    | 0.904766121 |
| Trappc8       | 777.3289204 | 0.029926127 | 0.126609353 | 0.236365849 | 0.813148794    | 0.860280542 |
| Wdr55         | 319.0653171 | 0.029882389 | 0.144315134 | 0.207063445 | 0.83596031     | 0.877984929 |
| Reck          | 67.38979915 | 0.029879366 | 0.585464652 | 0.051035302 | 0.95929739     | 0.970512249 |
| Mbtd1         | 496.1541383 | 0.029864276 | 0.15055295  | 0.19836394  | 0.842760329    | 0.882951975 |
| Lsm14b        | 534.1701614 | 0.029565436 | 0.207328905 | 0.142601614 | 0.886604823    | 0.916828765 |
| Mroh1         | 730.1924773 | 0.028818126 | 0.234425307 | 0.122930951 | 0.902161776    | 0.92824274  |
| Wbp4          | 382.1456485 | 0.028809073 | 0.143188445 | 0.201196909 | 0.840544608    | 0.881333691 |
| Dmwd          | 522.2587837 | 0.028672812 | 0.160018261 | 0.179184624 | 0.857792737    | 0.894686484 |
| Ap3s2         | 572.0448789 | 0.027963007 | 0.247792043 | 0.112848687 | 0.910150518    | 0.933869758 |
| Dr1           | 337.8032239 | 0.027960594 | 0.234689114 | 0.119138863 | 0.905165342    | 0.930154234 |
| Rabep2        | 348.0949905 | 0.027827809 | 0.152493911 | 0.182484721 | 0.855202344    | 0.892804015 |
| Mdm4          | 1857.078699 | 0.027733775 | 0.110189006 | 0.251692762 | 0.801278552    | 0.851208671 |
| Usp30         | 349.55473   | 0.027453842 | 0.230570026 | 0.119069434 | 0.905220347    | 0.930154691 |
| Ltbr          | 1684.964875 | 0.027281396 | 0.1961627   | 0.139075349 | 0.889390607    | 0.918984852 |
| Vmn1r78       | 1.001992623 | 0.0272576   | 2.009890762 | 0.013561732 | 0.989179635 NA |             |
| Ptbp3         | 1044.345251 | 0.026873125 | 0.187499117 | 0.143324008 | 0.886034296    | 0.91640555  |
| Kansl1        | 644.1976505 | 0.026836615 | 0.139452386 | 0.19244285  | 0.84739533     | 0.886654194 |
| Rexo5         | 65.64996026 | 0.02629292  | 0.274134638 | 0.095912432 | 0.92359012     | 0.943344579 |
| Ttc27         | 229.3379754 | 0.02607228  | 0.16114559  | 0.161793318 | 0.871468615    | 0.904853947 |
| 2410004P03Rik | 14.13277836 | 0.026064627 | 0.551974653 | 0.047220695 | 0.962337334    | 0.972606525 |
| Unc50         | 521.6528139 | 0.025973491 | 0.158839944 | 0.163519897 | 0.870109108    | 0.903882766 |
| Vmn1r27       | 3.385803436 | 0.025973285 | 1.036610371 | 0.025055976 | 0.980010315    | 0.985327663 |
| Ankrd46       | 911.3127881 | 0.025483821 | 0.165620398 | 0.153868852 | 0.877713144    | 0.910007522 |
| Fam160b2      | 284.0137431 | 0.025421096 | 0.256214137 | 0.099218164 | 0.920965053    | 0.94156595  |
| Shc1          | 1302.09913  | 0.025385623 | 0.203378338 | 0.124819698 | 0.900666293    | 0.926927797 |
| Serpina5      | 6.521900854 | 0.024594534 | 0.837317491 | 0.029373009 | 0.976567099    | 0.982909193 |
| Gm5403        | 0.423603646 | 0.024145438 | 3.63224598  | 0.006647523 | 0.994696083 NA |             |
| Olfr1290      | 0.509662039 | 0.024119949 | 3.632245823 | 0.006640506 | 0.994701682 NA |             |
| Rabepk        | 192.313267  | 0.02374727  | 0.282109051 | 0.084177625 | 0.932915207    | 0.950325727 |
| 4930578G10Rik | 0.600948443 | 0.023700471 | 2.515424962 | 0.009422054 | 0.9924824 NA   |             |
| Cacng2        | 7.651367755 | 0.023538752 | 0.718280319 | 0.032770982 | 0.973857219    | 0.980876631 |
| Shq1          | 110.9866075 | 0.023407113 | 0.228890502 | 0.102263365 | 0.918547634    | 0.939714358 |
| Golga5        | 582.8576576 | 0.023179512 | 0.208429398 | 0.111210375 | 0.911449524    | 0.934921269 |
| Gm28048       | 276.7382773 | 0.023052795 | 0.207645491 | 0.111019964 | 0.911600516    | 0.934963638 |
| Rnf14         | 932.8346672 | 0.022912612 | 0.147429462 | 0.155414065 | 0.876494896    | 0.909131479 |
| Fbxl15        | 137.6244966 | 0.022770776 | 0.395848042 | 0.057524034 | 0.954127762    | 0.966371797 |
| Inpp5k        | 451.1404118 | 0.022722834 | 0.187861612 | 0.120955177 | 0.903726538    | 0.929116259 |
| Mterf1b       | 22.07639704 | 0.022719401 | 0.517005282 | 0.043944234 | 0.964948855    | 0.974117799 |
| Epbl115       | 1058.307483 | 0.022682194 | 0.22554763  | 0.100564986 | 0.919895793    | 0.940837876 |
| Gemin4        | 123.0789472 | 0.022560907 | 0.345937075 | 0.065216795 | 0.948001389    | 0.962110232 |
| Gmpr2         | 268.5750757 | 0.022400604 | 0.185049833 | 0.121051739 | 0.903650055    | 0.929101148 |
| Med1          | 607.8348869 | 0.022226049 | 0.197307641 | 0.112646671 | 0.910310682    | 0.933977884 |
| Ssr1          | 2153.581106 | 0.022135842 | 0.273482744 | 0.080940543 | 0.935489237    | 0.952303129 |
| Mettl14       | 166.8373067 | 0.022079756 | 0.180399269 | 0.122393824 | 0.90258713     | 0.928512231 |
| Lgi1          | 2.763360085 | 0.022045825 | 1.985825258 | 0.011101594 | 0.991142392    | 0.993648662 |
| Fndc11        | 0.784741993 | 0.021922002 | 1.895401432 | 0.011565889 | 0.990771962 NA |             |
| Tmem161a      | 413.545097  | 0.021836995 | 0.158893034 | 0.137432046 | 0.890689302    | 0.919769291 |
| Gm8893        | 966.3076017 | 0.021582718 | 0.30974338  | 0.069679352 | 0.944448877    | 0.959533042 |
| Braf          | 445.1474552 | 0.021450147 | 0.168601582 | 0.127223879 | 0.898763206    | 0.925639772 |
| Klhl24        | 953.0905445 | 0.021404682 | 0.186427363 | 0.114815129 | 0.908591657    | 0.93271937  |
| Appl2         | 602.5554411 | 0.021198731 | 0.165105236 | 0.128395267 | 0.897836177    | 0.924796758 |
| Tacc1         | 803.2621413 | 0.021117181 | 0.238220739 | 0.088645435 | 0.929363698    | 0.9478331   |
| Capzb         | 1755.070371 | 0.021059544 | 0.153661601 | 0.137051441 | 0.890990134    | 0.919924548 |
| Gm3912        | 15.12719661 | 0.021026856 | 0.519400866 | 0.040482904 | 0.967708136    | 0.976124981 |
| Gm6176        | 0.15585113  | 0.020998718 | 3.643939011 | 0.005762643 | 0.995402102 NA |             |
| Csnk1d        | 1353.68911  | 0.020955859 | 0.170260672 | 0.123081032 | 0.902042931    | 0.928176478 |
| AI987944      | 320.0854909 | 0.020681335 | 0.241424212 | 0.085663879 | 0.931733617    | 0.949727635 |
| Usp6nl        | 516.4800651 | 0.020484773 | 0.204367951 | 0.100234764 | 0.920157948    | 0.94096651  |
| Cyp4f40       | 1.155700169 | 0.020321727 | 2.200761792 | 0.009233951 | 0.992632477 NA |             |



|               |             |             |             |             |             |             |
|---------------|-------------|-------------|-------------|-------------|-------------|-------------|
| Gm3550        | 8.376513973 | 0.020286837 | 0.650739308 | 0.031175061 | 0.975129929 | 0.981812169 |
| Dock6         | 591.231973  | 0.02021691  | 0.259950402 | 0.077772181 | 0.938009275 | 0.954298629 |
| Senp2         | 532.299396  | 0.02011027  | 0.123905049 | 0.162303878 | 0.871066561 | 0.904601775 |
| Dennd1a       | 545.7850953 | 0.019817224 | 0.198515167 | 0.099827253 | 0.920481471 | 0.941184437 |
| Ubap2         | 596.1696618 | 0.019771115 | 0.229483993 | 0.086154657 | 0.931343475 | 0.949386723 |
| Maskbp3       | 385.5731175 | 0.019693869 | 0.190673349 | 0.103285903 | 0.917736063 | 0.939109508 |
| Zc3hc1        | 257.7559464 | 0.019635129 | 0.207125231 | 0.094798346 | 0.924475001 | 0.9440787   |
| Tgm7          | 3.831760765 | 0.019560397 | 1.060012837 | 0.018452982 | 0.985277486 | 0.989456326 |
| Tfdp1         | 563.2644603 | 0.019192632 | 0.214496579 | 0.089477567 | 0.928702381 | 0.947430925 |
| Polr3f        | 284.6142367 | 0.018903538 | 0.219224451 | 0.086229152 | 0.931284257 | 0.949383126 |
| Zcchc2        | 752.3794464 | 0.018345995 | 0.200210529 | 0.091633515 | 0.926989222 | 0.946079518 |
| Srsf9         | 492.1758565 | 0.018325732 | 0.188607726 | 0.09716321  | 0.922596784 | 0.942725364 |
| Olfr787       | 2.000953191 | 0.018061772 | 1.411958166 | 0.012792002 | 0.989793737 | 0.992659522 |
| Asxl2         | 563.6948885 | 0.017987934 | 0.142366522 | 0.126349467 | 0.899455301 | 0.925976687 |
| Irak1         | 1146.923241 | 0.01796619  | 0.137345898 | 0.130809807 | 0.895925764 | 0.923710652 |
| Gm5940        | 2.003718901 | 0.017794762 | 2.268122781 | 0.00784559  | 0.993740189 | 0.995082687 |
| Gabpb1        | 236.3259502 | 0.017680593 | 0.213241356 | 0.08291353  | 0.933920296 | 0.950989918 |
| Metrn         | 68.41103407 | 0.017450094 | 0.257330367 | 0.067812027 | 0.94593527  | 0.960492388 |
| Pcif1         | 578.7771998 | 0.017373375 | 0.183035187 | 0.094918226 | 0.92437978  | 0.944038009 |
| Gm10093       | 1.202657935 | 0.016870922 | 2.192660295 | 0.007694271 | 0.993860921 | NA          |
| Tmco3         | 134.398315  | 0.016751934 | 0.263297198 | 0.063623671 | 0.949269883 | 0.963168252 |
| Pot1a         | 114.4666663 | 0.016680326 | 0.237076551 | 0.070358398 | 0.943908403 | 0.959098251 |
| Gm14740       | 1.675804691 | 0.016485093 | 1.416456551 | 0.011638262 | 0.99071422  | 0.99337834  |
| Cdkl5         | 116.523656  | 0.016447153 | 0.290711289 | 0.056575556 | 0.954883307 | 0.966974352 |
| Mau2          | 831.9293478 | 0.016394558 | 0.212962153 | 0.076983434 | 0.938636724 | 0.954823012 |
| Frrs1l        | 4.287707535 | 0.016290031 | 0.893922638 | 0.018223088 | 0.985460884 | 0.989582208 |
| Kars          | 1144.166793 | 0.01623648  | 0.190991478 | 0.085011544 | 0.932252213 | 0.94997225  |
| Rab26         | 1.602902447 | 0.016085904 | 1.482897385 | 0.010847618 | 0.991345023 | NA          |
| Plac9b        | 78.40103642 | 0.016069281 | 0.345805387 | 0.046469147 | 0.962936325 | 0.97298118  |
| Cks2          | 374.0728776 | 0.016052524 | 0.292655832 | 0.054851203 | 0.956257008 | 0.968068258 |
| Vapb          | 1363.157356 | 0.015654068 | 0.266928551 | 0.058645161 | 0.953234739 | 0.965754194 |
| Pus3          | 111.270609  | 0.015598773 | 0.233613457 | 0.066771724 | 0.946763434 | 0.961254073 |
| Hs1bp3        | 260.9113288 | 0.015437129 | 0.245444826 | 0.062894497 | 0.949850517 | 0.963470674 |
| Med28         | 363.1112712 | 0.015241011 | 0.141888997 | 0.107415029 | 0.914459732 | 0.936818981 |
| Lrrc8d        | 688.9344183 | 0.015167849 | 0.155964327 | 0.097252038 | 0.922526244 | 0.942709788 |
| Sfxn2         | 871.7647992 | 0.014541565 | 0.225179532 | 0.064577651 | 0.948510279 | 0.962512098 |
| Dot1l         | 819.6287089 | 0.014290598 | 0.142963338 | 0.099959882 | 0.920376176 | 0.94113322  |
| Olfr1383      | 5.971350887 | 0.014208707 | 0.793417866 | 0.017908227 | 0.985712066 | 0.989659558 |
| Oxsr1         | 511.4048359 | 0.014148371 | 0.135344163 | 0.104536248 | 0.916743804 | 0.938432111 |
| Dapk1         | 1342.962846 | 0.014021925 | 0.18670582  | 0.075101705 | 0.940133791 | 0.955946611 |
| Snajc16       | 284.8407612 | 0.013957097 | 0.183157148 | 0.076202851 | 0.939257715 | 0.955283708 |
| Gm2398        | 1.677180027 | 0.013845572 | 1.524365879 | 0.00908284  | 0.992753041 | 0.994736914 |
| Sar1a         | 1347.337782 | 0.013779278 | 0.149899084 | 0.091923698 | 0.926758663 | 0.945900837 |
| Mov10         | 574.8852459 | 0.013748756 | 0.210059539 | 0.065451709 | 0.947814354 | 0.962024737 |
| A130010J15Rik | 133.6592022 | 0.013675855 | 0.260453474 | 0.052507861 | 0.958124032 | 0.969612875 |
| Gm42742       | 264.5637313 | 0.013525646 | 0.240816153 | 0.056165859 | 0.955209679 | 0.967237741 |
| Cyhr1         | 1533.163389 | 0.013151732 | 0.208031706 | 0.063219842 | 0.949591444 | 0.96326662  |
| Yes1          | 499.4950857 | 0.013140394 | 0.280017398 | 0.046927064 | 0.962571358 | 0.972785376 |
| Fam172a       | 211.0340329 | 0.012668292 | 0.182627685 | 0.069366767 | 0.944697681 | 0.959671438 |
| Gm19016       | 1.187453832 | 0.011934706 | 2.11943384  | 0.005631082 | 0.99550707  | NA          |
| Crebl2        | 697.9457978 | 0.011756563 | 0.170939277 | 0.068776254 | 0.94516772  | 0.960091717 |
| Mtmr2         | 504.7710715 | 0.011749064 | 0.181901191 | 0.064590362 | 0.948500159 | 0.962512098 |
| Taf6l         | 90.46655608 | 0.011700696 | 0.251516633 | 0.046520567 | 0.962895342 | 0.97298118  |
| Yy1           | 1105.171827 | 0.011688234 | 0.148530348 | 0.078692567 | 0.937277158 | 0.953724542 |
| Hnrnp1        | 2476.708334 | 0.011640073 | 0.171719724 | 0.0677853   | 0.945956545 | 0.960492388 |
| Znrd1         | 186.6763554 | 0.011570066 | 0.193947544 | 0.059655644 | 0.9524299   | 0.965282975 |
| Npepps        | 648.5148877 | 0.011518812 | 0.230365159 | 0.050002405 | 0.960120472 | 0.971015237 |
| Hsf1          | 475.3972629 | 0.011430418 | 0.188637072 | 0.060594758 | 0.951681948 | 0.964696983 |
| Hspa13        | 479.5956482 | 0.011313363 | 0.191053882 | 0.059215564 | 0.952780413 | 0.96546603  |
| Tesk1         | 415.3674664 | 0.011209503 | 0.22283504  | 0.050304042 | 0.959880103 | 0.970900488 |
| Ubtcd1        | 178.7072096 | 0.011108133 | 0.219330145 | 0.05064572  | 0.95960783  | 0.97076871  |
| Med21         | 393.3659514 | 0.01101753  | 0.2760734   | 0.039907974 | 0.968166494 | 0.976470587 |
| Cfap61        | 4.097199769 | 0.010768203 | 1.245565729 | 0.00864523  | 0.99310219  | 0.994911332 |
| Mtap          | 434.6132814 | 0.010419221 | 0.190674924 | 0.0546439   | 0.956422164 | 0.968177962 |
| Kpna2         | 939.8931302 | 0.010319878 | 0.165074895 | 0.062516339 | 0.95015165  | 0.963604125 |
| Rnf113a2      | 162.7075577 | 0.009950877 | 0.190771211 | 0.052161312 | 0.95840016  | 0.969834744 |

|          |             |              |             |              |             |             |
|----------|-------------|--------------|-------------|--------------|-------------|-------------|
| Zfp229   | 108.7337543 | 0.009615485  | 0.291076379 | 0.033034232  | 0.973647289 | 0.980781079 |
| Serbp1   | 3111.384634 | 0.009256334  | 0.135882716 | 0.068120027  | 0.945690088 | 0.960450651 |
| Zfp260   | 690.0659953 | 0.009244059  | 0.197637041 | 0.046772908  | 0.962694222 | 0.972851873 |
| Ank      | 436.6673537 | 0.009177694  | 0.276302295 | 0.033216134  | 0.973502232 | 0.980692906 |
| Ffar2    | 2.975367181 | 0.009121409  | 1.315074461 | 0.00693604   | 0.994465885 | 0.995692395 |
| Farsa    | 504.4068358 | 0.009071935  | 0.196550269 | 0.0461558    | 0.963186072 | 0.973175852 |
| Aar2     | 297.5758049 | 0.008424266  | 0.208789836 | 0.040348067  | 0.967815633 | 0.976175654 |
| Tpt1-ps3 | 4815.381241 | 0.008353773  | 0.12774628  | 0.065393478  | 0.947860717 | 0.962024737 |
| Vps33b   | 165.6639172 | 0.007813229  | 0.224707318 | 0.034770694  | 0.972262589 | 0.979776013 |
| Tmem216  | 63.47189345 | 0.007522535  | 0.275696195 | 0.027285595  | 0.978231946 | 0.984044774 |
| Mtr      | 212.9545491 | 0.007511605  | 0.195379837 | 0.038446163  | 0.969331956 | 0.977358125 |
| Nckap5   | 12.17887921 | 0.007444082  | 0.685780568 | 0.010854904  | 0.99133921  | 0.993670676 |
| Dipk2a   | 766.1154625 | 0.007426529  | 0.225883305 | 0.032877725  | 0.973772096 | 0.980848844 |
| Gprasp1  | 240.4373236 | 0.007092379  | 0.260417399 | 0.027234657  | 0.978272573 | 0.984044774 |
| Olfr1392 | 5.361403063 | 0.007033928  | 0.805820731 | 0.008728899  | 0.993035435 | 0.994911332 |
| Fbxw2    | 684.9908185 | 0.006942045  | 0.156378038 | 0.044392711  | 0.964591372 | 0.973903092 |
| Uri1     | 750.9052175 | 0.006892314  | 0.153937216 | 0.044773537  | 0.964287818 | 0.973711942 |
| Ap1g2    | 269.1402565 | 0.006877387  | 0.282002041 | 0.024387719  | 0.980543344 | 0.985747313 |
| E4f1     | 282.4765212 | 0.006556405  | 0.277817736 | 0.023599665  | 0.98117194  | 0.9860885   |
| Smagp    | 554.8004628 | 0.006486024  | 0.174004895 | 0.037274951  | 0.970265778 | 0.97812613  |
| Gm42672  | 1.232296777 | 0.006449221  | 1.638573689 | 0.003935875  | 0.996859634 | NA          |
| Tnnt2    | 15.49665645 | 0.006432151  | 0.510150905 | 0.012608331  | 0.989940274 | 0.9927354   |
| Kcnab3   | 12.21547486 | 0.006430386  | 0.555031275 | 0.011585628  | 0.990756213 | 0.99337834  |
| Yipf6    | 529.2365812 | 0.006379531  | 0.156271503 | 0.040823383  | 0.967436698 | 0.975962597 |
| Ces2f    | 17.76206294 | 0.006177999  | 0.450575477 | 0.013711352  | 0.989060266 | 0.992037447 |
| Nsrp1    | 234.0357912 | 0.005542043  | 0.175638006 | 0.031553779  | 0.974827904 | 0.981680318 |
| Nop53    | 1393.040397 | 0.005479788  | 0.163544921 | 0.033506317  | 0.973270829 | 0.98061849  |
| Ccn3     | 2.253995381 | 0.005459879  | 1.150734395 | 0.004744691  | 0.996214299 | 0.997064133 |
| Fam161b  | 18.19625561 | 0.005205322  | 0.516131561 | 0.010085261  | 0.991953262 | 0.994169266 |
| Slc44a1  | 749.4660347 | 0.004869574  | 0.188531537 | 0.025828965  | 0.979393759 | 0.984940113 |
| Gm4724   | 83.35943217 | 0.004786879  | 0.291229366 | 0.016436799  | 0.986885922 | 0.99048812  |
| Slc35a5  | 305.4926921 | 0.00474139   | 0.180519193 | 0.026265298  | 0.979045733 | 0.984764391 |
| Ccdc59   | 404.6676068 | 0.004715813  | 0.153149472 | 0.030792224  | 0.975435242 | 0.98200189  |
| Tsen2    | 160.8839277 | 0.004526259  | 0.210174857 | 0.021535681  | 0.982818341 | 0.987335715 |
| Tulp4    | 757.8683627 | 0.00433603   | 0.201264519 | 0.021543936  | 0.982811756 | 0.987335715 |
| Zfp300   | 5.222499898 | 0.004329743  | 0.832999946 | 0.00519777   | 0.995852798 | 0.99678831  |
| Olfr190  | 2.609689703 | 0.004282279  | 1.165287444 | 0.003674869  | 0.997067885 | 0.997653088 |
| H2ac10   | 1.22985319  | 0.004187098  | 2.629859115 | 0.001592138  | 0.998729658 | NA          |
| Nkapl    | 4.079546797 | 0.004122573  | 0.942648748 | 0.004373392  | 0.996510549 | 0.997212482 |
| Ccdc2c   | 9.809515275 | 0.003821571  | 0.622937317 | 0.00613476   | 0.995105201 | 0.996215483 |
| Ccr4     | 6.820709513 | 0.003450953  | 0.733341286 | 0.004705794  | 0.996245333 | 0.997064133 |
| Ripk1    | 580.7464368 | 0.003387767  | 0.209039681 | 0.016206333  | 0.987069783 | 0.99055602  |
| Ppm1f    | 432.916981  | 0.002985693  | 0.181009491 | 0.016494676  | 0.986839749 | 0.99048812  |
| Vmn1r193 | 4.336873308 | 0.002825901  | 0.868812989 | 0.003252599  | 0.997404806 | 0.997855134 |
| Inpp4a   | 518.5043799 | 0.002659187  | 0.190110913 | 0.013987555  | 0.98883991  | 0.99192367  |
| Supt6    | 1076.443577 | 0.002510708  | 0.158703112 | 0.015820154  | 0.98737787  | 0.990806871 |
| Angel2   | 407.6767599 | 0.002253879  | 0.164522562 | 0.013699511  | 0.989069714 | 0.992037447 |
| Gtf2ird2 | 133.5518369 | 0.002196226  | 0.266396716 | 0.008244193  | 0.99342216  | 0.995056462 |
| Hdlbp    | 8239.208232 | 0.002108591  | 0.255140053 | 0.008264446  | 0.993406001 | 0.995056462 |
| Olfr1277 | 2.452061417 | 0.002083952  | 1.345387422 | 0.001548961  | 0.998764109 | 0.998998505 |
| Brk1     | 1160.621561 | 0.001985343  | 0.184401566 | 0.01076641   | 0.991409814 | 0.993683021 |
| Pik3c3   | 344.7034546 | 0.001323214  | 0.163868057 | 0.008074874  | 0.993557253 | 0.995082687 |
| Rnf220   | 513.8032137 | 0.001172315  | 0.148296943 | 0.007905185  | 0.993692641 | 0.995082687 |
| Arhgef3  | 582.7596429 | 0.000667234  | 0.208399142 | 0.003201711  | 0.997445409 | 0.997855134 |
| Olfr889  | 2.06345489  | 0.00043604   | 1.260814579 | 0.00034584   | 0.99972406  | 0.999841357 |
| Gm8226   | 1.649568893 | 0.000422646  | 2.160927382 | 0.000195585  | 0.999843945 | 0.999868119 |
| Ywhae    | 3943.848299 | 0.000340135  | 0.120021192 | 0.002833961  | 0.997738829 | 0.998090104 |
| Gm6158   | 120.055288  | 3.27E-05     | 0.197603352 | 0.000165288  | 0.999868119 | 0.999868119 |
| Rgs7bp   | 7.481689047 | -0.000396884 | 0.716907613 | -0.000553606 | 0.999558287 | 0.999734213 |
| Arhgap24 | 223.7937915 | -0.000903214 | 0.271241745 | -0.003329922 | 0.997343112 | 0.997855134 |
| Olfr362  | 0.857047104 | -0.001042553 | 2.074645178 | -0.000502521 | 0.999599046 | NA          |
| Snapc2   | 222.2861253 | -0.001330533 | 0.161245031 | -0.008251625 | 0.993416231 | 0.995056462 |
| Zfp157   | 142.6252849 | -0.00136309  | 0.230583029 | -0.005911492 | 0.995283339 | 0.996335312 |
| Tecpr1   | 344.0006736 | -0.001406221 | 0.22663027  | -0.006204912 | 0.995049228 | 0.996215483 |
| Bace1    | 482.4006194 | -0.001635227 | 0.178107881 | -0.009181102 | 0.992674643 | 0.994716824 |
| Ap2a1    | 753.3720659 | -0.001785414 | 0.179704858 | -0.009935258 | 0.992072941 | 0.994230762 |

|               |             |              |             |              |             |             |
|---------------|-------------|--------------|-------------|--------------|-------------|-------------|
| Fut2          | 5.289702241 | -0.001867248 | 0.875795709 | -0.002132059 | 0.998298864 | 0.998591741 |
| Tbc1d16       | 290.1773055 | -0.001870121 | 0.171118734 | -0.010928791 | 0.991280226 | 0.993670676 |
| Med19         | 316.7024821 | -0.001907974 | 0.174654149 | -0.010924299 | 0.991283844 | 0.993670676 |
| Ykt6          | 941.5746388 | -0.002073046 | 0.181647955 | -0.011412438 | 0.99089439  | 0.993458454 |
| Hspbp1        | 422.7561536 | -0.002267982 | 0.186139829 | -0.012184292 | 0.990278582 | 0.99301625  |
| Atp6v0a2      | 578.0995647 | -0.002319419 | 0.162690554 | -0.014256627 | 0.988625242 | 0.99181952  |
| Gpr135        | 71.28875459 | -0.002365676 | 0.537707079 | -0.004399562 | 0.996489669 | 0.997212482 |
| Unc119b       | 526.1347513 | -0.002367866 | 0.166861382 | -0.014190618 | 0.988677905 | 0.99181952  |
| Zfp14         | 44.41577881 | -0.002629358 | 0.326987903 | -0.008041147 | 0.993584162 | 0.995082687 |
| Drd1          | 1.216057403 | -0.002872139 | 1.638340636 | -0.001753078 | 0.998601247 | NA          |
| Rfx5          | 313.54194   | -0.003627899 | 0.200433047 | -0.018100305 | 0.985558835 | 0.989622277 |
| Ccdc91        | 381.4480626 | -0.003869986 | 0.161553483 | -0.02395483  | 0.980888639 | 0.985978155 |
| Scd3          | 3.406578299 | -0.00387322  | 1.041254811 | -0.003719762 | 0.997032066 | 0.997653088 |
| Krr1          | 372.5652091 | -0.004153092 | 0.199707163 | -0.020795907 | 0.983408463 | 0.987870336 |
| 9930104L06Rik | 129.9626106 | -0.004154703 | 0.243396792 | -0.017069671 | 0.986381035 | 0.990214573 |
| Cndp2         | 755.9403941 | -0.004232217 | 0.127355422 | -0.033231538 | 0.973489949 | 0.980692906 |
| Fam104a       | 412.232108  | -0.004246054 | 0.189430702 | -0.022414817 | 0.982117061 | 0.986805662 |
| Iqsec2        | 350.1600835 | -0.004559205 | 0.184022801 | -0.024775216 | 0.98023426  | 0.985494702 |
| Nkap5         | 30.94096966 | -0.00478011  | 0.374143218 | -0.012776152 | 0.989806383 | 0.992659522 |
| Nhp2          | 522.303821  | -0.004982854 | 0.171749591 | -0.029012317 | 0.976854767 | 0.983024619 |
| Rassf8        | 741.1814986 | -0.005479246 | 0.187675045 | -0.029195389 | 0.976708759 | 0.98293571  |
| Dpp8          | 863.2781322 | -0.005745337 | 0.162677838 | -0.035317267 | 0.971826755 | 0.979525985 |
| Rpp21         | 208.7948415 | -0.005820836 | 0.204302341 | -0.028491281 | 0.977270322 | 0.98338475  |
| Lman2l        | 283.2205715 | -0.005968762 | 0.229030865 | -0.026060951 | 0.979208723 | 0.984867739 |
| Kat14         | 384.3383236 | -0.005970157 | 0.211283988 | -0.028256552 | 0.977457533 | 0.983515081 |
| Dazap1        | 1164.092165 | -0.006414684 | 0.129901709 | -0.049381058 | 0.966515623 | 0.971269506 |
| Rpl4          | 10988.85987 | -0.00642712  | 0.139679268 | -0.046013418 | 0.963299555 | 0.973232833 |
| Cmss1         | 69.86992529 | -0.006470008 | 0.272622002 | -0.023732522 | 0.981065964 | 0.9860885   |
| Asap2         | 311.6174886 | -0.006824859 | 0.266709304 | -0.025589129 | 0.979585057 | 0.985074385 |
| Gm12481       | 498.4251349 | -0.006854213 | 0.250534583 | -0.02735835  | 0.978173917 | 0.984044774 |
| Noc4l         | 253.2332894 | -0.006894336 | 0.233690267 | -0.029502025 | 0.976464204 | 0.982863656 |
| Gm13498       | 2.085603659 | -0.00689774  | 1.264072988 | -0.005456758 | 0.995646159 | 0.996639993 |
| Stk25         | 1125.578246 | -0.006986492 | 0.12051746  | -0.057970791 | 0.953771895 | 0.966183568 |
| Atp6ap2       | 735.2506011 | -0.007050288 | 0.160559036 | -0.043910877 | 0.964975445 | 0.974117799 |
| Epor          | 15.87748865 | -0.007277906 | 0.512612712 | -0.01419767  | 0.988672279 | 0.99181952  |
| Zfp606        | 176.9165493 | -0.007411701 | 0.294519896 | -0.025165366 | 0.979923062 | 0.985298046 |
| Zfp939        | 51.40217082 | -0.007594445 | 0.316643966 | -0.023984178 | 0.980865229 | 0.985978155 |
| Mxd4          | 1481.212218 | -0.007688094 | 0.155473018 | -0.049449697 | 0.960560924 | 0.971269506 |
| Nup85         | 413.2584674 | -0.007706834 | 0.168636166 | -0.045700954 | 0.963548603 | 0.973369079 |
| Pdcd11        | 606.6506024 | -0.007884064 | 0.231783408 | -0.034014789 | 0.972865357 | 0.980283032 |
| Polr3e        | 338.4782104 | -0.00800803  | 0.181255826 | -0.044180815 | 0.964760275 | 0.97401594  |
| Ssb           | 1362.404221 | -0.00804665  | 0.105980685 | -0.075925625 | 0.93947827  | 0.955394032 |
| Parg          | 285.2969409 | -0.008293472 | 0.202929874 | -0.040868661 | 0.967400602 | 0.975962597 |
| Ncoa1         | 460.6742341 | -0.008582365 | 0.224280454 | -0.038266221 | 0.969475423 | 0.977444971 |
| Ppp1r1c       | 3.778947227 | -0.008718385 | 1.226161502 | -0.007110307 | 0.994326844 | 0.995611655 |
| Per3          | 271.3912062 | -0.008975172 | 0.475518614 | -0.018874492 | 0.984941228 | 0.989235187 |
| Hnrnpul1      | 1465.331867 | -0.009071316 | 0.15407873  | -0.058874553 | 0.953052027 | 0.965651283 |
| Gm3591        | 0.718310103 | -0.009371449 | 2.862853046 | -0.003273465 | 0.997388158 | NA          |
| Tfb1m         | 154.7806662 | -0.009377679 | 0.229905016 | -0.040789363 | 0.967463819 | 0.975962597 |
| Strap         | 1530.437306 | -0.009447357 | 0.110643187 | -0.085385801 | 0.931954681 | 0.94983132  |
| Zfp386        | 294.9231089 | -0.010002826 | 0.224961279 | -0.044464658 | 0.964534023 | 0.973902868 |
| Kif1bp        | 261.6153742 | -0.01007945  | 0.162048655 | -0.062200144 | 0.950403448 | 0.963744824 |
| Tpk1          | 481.3999424 | -0.010080472 | 0.244739966 | -0.041188501 | 0.967145621 | 0.975846268 |
| Bcl2l2        | 483.4079923 | -0.010225185 | 0.166881387 | -0.061272171 | 0.951142454 | 0.964264781 |
| Clec14a       | 108.5002234 | -0.010377853 | 0.329651169 | -0.031481318 | 0.974885691 | 0.981680523 |
| Pms1          | 153.4418044 | -0.010655838 | 0.234096701 | -0.045518959 | 0.963693664 | 0.973407484 |
| Cnot10        | 523.6454943 | -0.010773573 | 0.126628361 | -0.085080251 | 0.932197591 | 0.94997225  |
| Ii1a          | 33.6271068  | -0.011046155 | 0.560627663 | -0.019703193 | 0.984280143 | 0.988629464 |
| Slc18b1       | 117.9723163 | -0.011188489 | 0.354472962 | -0.031563732 | 0.974819967 | 0.981680318 |
| Gpr155        | 565.667287  | -0.011378696 | 0.229763558 | -0.049523503 | 0.960502108 | 0.971269506 |
| Zfp3          | 48.62757594 | -0.011467434 | 0.37064349  | -0.030939256 | 0.975317983 | 0.981941828 |
| Slc20a2       | 1054.611609 | -0.012229725 | 0.183788368 | -0.06654243  | 0.946945978 | 0.961268014 |
| AW146154      | 137.1299906 | -0.012385626 | 0.244993295 | -0.05055496  | 0.959680153 | 0.970784267 |
| Erc2          | 357.1395825 | -0.012545602 | 0.217012873 | -0.057810403 | 0.953899651 | 0.966198162 |
| Olfir250      | 5.156976671 | -0.012558479 | 0.853109162 | -0.014720834 | 0.988254898 | 0.991628575 |
| Nipbl         | 840.4224774 | -0.012594536 | 0.150166754 | -0.083870332 | 0.933159528 | 0.950499112 |

|                |             |              |             |              |             |             |
|----------------|-------------|--------------|-------------|--------------|-------------|-------------|
| Trmu           | 246.5369404 | -0.012810477 | 0.207253658 | -0.061810618 | 0.950713647 | 0.964002038 |
| Csn1s2b        | 1.658532327 | -0.012993873 | 1.496109675 | -0.008685107 | 0.993070374 | 0.994911332 |
| Pigq           | 739.2412229 | -0.01299766  | 0.160158642 | -0.081154911 | 0.935318757 | 0.952186443 |
| Vipas39        | 372.5461618 | -0.013056868 | 0.254995832 | -0.051204241 | 0.959162773 | 0.970433647 |
| Sfpq           | 1759.521467 | -0.013133304 | 0.151489568 | -0.086694445 | 0.930914392 | 0.949119583 |
| Hmgb1-ps3      | 7.514335973 | -0.013366931 | 0.818987294 | -0.016321293 | 0.986978071 | 0.99052229  |
| Dgat1          | 459.7412844 | -0.01380972  | 0.157996738 | -0.087405098 | 0.930349517 | 0.948607295 |
| 2610044015Rik8 | 304.5214413 | -0.013848199 | 0.207619058 | -0.066700038 | 0.946820504 | 0.961254073 |
| Rab28          | 209.0630847 | -0.014051925 | 0.171844505 | -0.081771163 | 0.934828688 | 0.951858058 |
| Pfdn5          | 1469.273876 | -0.014237195 | 0.14997427  | -0.094930914 | 0.924369701 | 0.944038009 |
| Gm8349         | 1.013108282 | -0.014571356 | 2.257258933 | -0.006455332 | 0.994849426 | NA          |
| Vcp-rs         | 2.028857451 | -0.014739739 | 1.876832618 | -0.007853518 | 0.993733864 | 0.995082687 |
| Laptm4a        | 3453.67848  | -0.015397661 | 0.169460969 | -0.090862583 | 0.927601782 | 0.946565782 |
| Pold4          | 388.7953144 | -0.015643177 | 0.169805008 | -0.092124358 | 0.926599236 | 0.945794742 |
| Ino80          | 488.5975182 | -0.016268941 | 0.161256058 | -0.100888866 | 0.919638682 | 0.940717643 |
| Paxbp1         | 754.0208769 | -0.016768694 | 0.212029446 | -0.079086627 | 0.93696372  | 0.953476495 |
| Gm5316         | 3.416163398 | -0.017071193 | 0.947544224 | -0.01801625  | 0.98562589  | 0.989631319 |
| Gm5622         | 0.846667032 | -0.017080323 | 2.315928968 | -0.00737515  | 0.994115535 | NA          |
| A630010A05Rik  | 9.591723971 | -0.0170853   | 0.833771596 | -0.020491584 | 0.983651226 | 0.98805598  |
| Tram2          | 267.6369826 | -0.017519847 | 0.195989936 | -0.089391564 | 0.928770728 | 0.947443954 |
| Fbrs           | 973.7342758 | -0.017574918 | 0.146980305 | -0.119573283 | 0.904821185 | 0.929968744 |
| Ccdc127        | 419.3714422 | -0.017631512 | 0.301211634 | -0.058535297 | 0.953322248 | 0.965785458 |
| Sema4a         | 1164.315623 | -0.018052576 | 0.137763873 | -0.131039983 | 0.895743678 | 0.923645934 |
| Aftph          | 694.7492641 | -0.018155305 | 0.168452401 | -0.107777064 | 0.914172537 | 0.936657636 |
| Tln2           | 191.4156661 | -0.018279458 | 0.397965584 | -0.045932259 | 0.963364242 | 0.973240509 |
| Syngt2         | 1530.605655 | -0.018299226 | 0.106312508 | -0.172126746 | 0.863337886 | 0.898820414 |
| Ate1           | 452.3425366 | -0.018307383 | 0.161108741 | -0.113633705 | 0.909528168 | 0.933512113 |
| Rpsa           | 11177.78589 | -0.018470792 | 0.157529355 | -0.117253014 | 0.906659558 | 0.93124064  |
| Eef2k          | 139.7525451 | -0.018769475 | 0.222886976 | -0.084210731 | 0.932888886 | 0.950325727 |
| Slc38a7        | 450.6908166 | -0.018942129 | 0.142757771 | -0.132687202 | 0.894440765 | 0.922621353 |
| Scaf1          | 1232.851331 | -0.019073363 | 0.156638419 | -0.121766823 | 0.90308369  | 0.928742882 |
| Dazap2         | 3027.898209 | -0.019162397 | 0.110659445 | -0.173165492 | 0.862521347 | 0.898336278 |
| Zfp455         | 21.9031481  | -0.019239463 | 0.499961311 | -0.038481904 | 0.96930346  | 0.977358125 |
| Hsd17b13       | 6892.740822 | -0.019241196 | 0.186821167 | -0.102992592 | 0.91796885  | 0.939291337 |
| Vmac           | 272.4367471 | -0.019271554 | 0.252743151 | -0.076249559 | 0.939220555 | 0.955283708 |
| Tlk2           | 501.8216573 | -0.019309108 | 0.220278678 | -0.087657635 | 0.930148793 | 0.948509189 |
| Ints3          | 518.7439484 | -0.019378816 | 0.182627352 | -0.106111245 | 0.915494089 | 0.937490584 |
| Gm9512         | 2.308467467 | -0.019664149 | 1.172093135 | -0.016776951 | 0.986614558 | 0.99033237  |
| Zdhc3          | 562.0462653 | -0.01978673  | 0.162007495 | -0.122134658 | 0.902792374 | 0.928611343 |
| Sfi1           | 470.1798012 | -0.019814171 | 0.313425687 | -0.063218083 | 0.949592845 | 0.96326662  |
| Gtpbp6         | 280.2707238 | -0.019867659 | 0.263304179 | -0.075455161 | 0.939852572 | 0.955717665 |
| Map3k11        | 850.4137098 | -0.020047798 | 0.136735753 | -0.146617086 | 0.883434266 | 0.914382088 |
| Rab22a         | 670.763201  | -0.02013694  | 0.28016518  | -0.071875242 | 0.942701193 | 0.957928709 |
| Gm10693        | 0.412876722 | -0.020212184 | 2.725832669 | -0.00741505  | 0.994083701 | NA          |
| Med26          | 116.4048146 | -0.020388343 | 0.206845967 | -0.098567754 | 0.921481473 | 0.942022671 |
| Commd9         | 363.7587329 | -0.0205642   | 0.202230813 | -0.101686778 | 0.919005298 | 0.940126152 |
| Ecm2           | 34.83259193 | -0.0208496   | 0.343928106 | -0.060621972 | 0.951660275 | 0.964696983 |
| Tm7sf3         | 1144.664692 | -0.021099077 | 0.174523163 | -0.120895568 | 0.903773752 | 0.929116259 |
| D5Ert579e      | 875.4945314 | -0.021133073 | 0.16359376  | -0.129180191 | 0.89721507  | 0.924455227 |
| Olfr177        | 1.839678719 | -0.021176587 | 1.49092591  | -0.014203648 | 0.98866751  | 0.99181952  |
| Ints2          | 164.826229  | -0.021215028 | 0.248413265 | -0.085402156 | 0.93194168  | 0.94983132  |
| Gm10036        | 12.02543756 | -0.021475575 | 0.58116858  | -0.036952401 | 0.970522958 | 0.978327542 |
| Olfr318        | 7.999763951 | -0.021647502 | 0.769679391 | -0.028125349 | 0.977562176 | 0.983562322 |
| D6Wsu163e      | 153.5325047 | -0.022251784 | 0.263958089 | -0.084300443 | 0.93281756  | 0.950325727 |
| Tbc1d23        | 344.5836089 | -0.022697885 | 0.205679388 | -0.110355661 | 0.912127316 | 0.935335127 |
| Tasor2         | 254.9045742 | -0.022731987 | 0.236351722 | -0.096178641 | 0.923378694 | 0.943268789 |
| Gna11          | 1081.494142 | -0.022819523 | 0.152162408 | -0.149968201 | 0.880789704 | 0.912420421 |
| Anapc7         | 422.0261984 | -0.023081375 | 0.20545471  | -0.112342883 | 0.910551541 | 0.934146776 |
| Siae           | 655.4705029 | -0.023399517 | 0.207046072 | -0.11301599  | 0.910017878 | 0.933851125 |
| Grb2           | 955.8914051 | -0.023430486 | 0.118158844 | -0.198296505 | 0.842813086 | 0.882951975 |
| Ctbs           | 217.2232    | -0.02368874  | 0.229288476 | -0.103314134 | 0.917713658 | 0.939109508 |
| Fam221b        | 6.970452534 | -0.023786009 | 0.661167349 | -0.035975777 | 0.971301673 | 0.979054628 |
| Cblc           | 459.8049127 | -0.023814726 | 0.167520633 | -0.142159955 | 0.886953662 | 0.917022623 |
| Bbof1          | 24.98382578 | -0.023956844 | 0.390314035 | -0.061378383 | 0.951057867 | 0.964236368 |
| St3gal4        | 1750.833685 | -0.023958608 | 0.263952803 | -0.090768531 | 0.927676516 | 0.946565782 |
| Abraxas2       | 463.737069  | -0.024282832 | 0.156470552 | -0.15519107  | 0.876670688 | 0.909258496 |

|           |             |              |             |              |             |    |             |
|-----------|-------------|--------------|-------------|--------------|-------------|----|-------------|
| Rps24-ps3 | 0.445740856 | -0.024294386 | 3.109546203 | -0.00781284  | 0.993766319 | NA |             |
| Cngb1     | 6.910392354 | -0.02431628  | 0.82399053  | -0.029510388 | 0.976457534 |    | 0.982863656 |
| Klra9     | 2.340337748 | -0.024366495 | 1.384204279 | -0.017603251 | 0.985955363 |    | 0.989845535 |
| Gm10668   | 0.126846307 | -0.024592659 | 3.649706385 | -0.006738257 | 0.99462369  | NA |             |
| Gm4567    | 0.126846307 | -0.024592659 | 3.649706385 | -0.006738257 | 0.99462369  | NA |             |
| Mmd2      | 62.38873925 | -0.02460589  | 0.572937501 | -0.042946901 | 0.965743862 |    | 0.974665384 |
| Rab4b     | 455.587251  | -0.024748989 | 0.230537301 | -0.107353512 | 0.914508533 |    | 0.936818981 |
| Zfp97     | 186.0493661 | -0.02547579  | 0.242813172 | -0.104919306 | 0.916439839 |    | 0.938177288 |
| Cbll1     | 171.981182  | -0.025499431 | 0.239594543 | -0.106427426 | 0.915243234 |    | 0.937290001 |
| Map3k4    | 375.3966676 | -0.025578347 | 0.165679755 | -0.154384266 | 0.877306759 |    | 0.909752167 |
| Cep76     | 118.8295591 | -0.025718635 | 0.187697368 | -0.137021818 | 0.89101355  |    | 0.919924548 |
| Tbcd      | 514.3098365 | -0.025778485 | 0.14032629  | -0.183703886 | 0.85424576  |    | 0.892133161 |
| Pwwp2a    | 294.7402036 | -0.025829578 | 0.213235933 | -0.121131452 | 0.903586918 |    | 0.929092266 |
| Rhox8     | 4.665959681 | -0.026456348 | 0.962429888 | -0.027489117 | 0.97806962  |    | 0.984014806 |
| Gm5616    | 7.03798193  | -0.026716666 | 2.718913577 | -0.009826228 | 0.99215993  |    | 0.994259493 |
| Zfp94     | 46.97890981 | -0.026885456 | 0.339757737 | -0.079131253 | 0.936928225 |    | 0.953476495 |
| Zfp277    | 274.9077498 | -0.026966604 | 0.189557031 | -0.142261165 | 0.88687372  |    | 0.916995584 |
| Stx19     | 1.256377867 | -0.027011531 | 1.789521667 | -0.015094274 | 0.987956969 | NA |             |
| R3hdm1    | 604.9353357 | -0.027279534 | 0.191004566 | -0.142821371 | 0.886431258 |    | 0.916704889 |
| Slc2a12   | 1.471531897 | -0.027504101 | 1.511990998 | -0.018190651 | 0.985486761 | NA |             |
| Saal1     | 134.0816129 | -0.027570544 | 0.255471379 | -0.107920284 | 0.914058926 |    | 0.936639814 |
| Cnm2      | 110.9520284 | -0.027579299 | 0.254607761 | -0.108320733 | 0.913741277 |    | 0.936426888 |
| Dus3l     | 491.2446544 | -0.027687353 | 0.208073436 | -0.133065294 | 0.894141742 |    | 0.922384631 |
| Upf3a     | 306.6955368 | -0.027880209 | 0.161476606 | -0.172657883 | 0.862920351 |    | 0.898495459 |
| Usp32     | 585.3218181 | -0.028065573 | 0.195300059 | -0.143704886 | 0.885733513 |    | 0.916316823 |
| Piga      | 124.5070374 | -0.028289892 | 0.217544108 | -0.130042097 | 0.896533121 |    | 0.924060165 |
| Washc2    | 1285.693465 | -0.028410222 | 0.152923194 | -0.185780987 | 0.852616515 |    | 0.890922853 |
| Zfp451    | 339.0690394 | -0.028461801 | 0.18241624  | -0.156026683 | 0.876011988 |    | 0.908819755 |
| Gm47406   | 33.43331605 | -0.028739685 | 0.459580445 | -0.062534612 | 0.950137099 |    | 0.963604125 |
| Nub1      | 672.8401558 | -0.029193358 | 0.120937668 | -0.241391774 | 0.809251488 |    | 0.857434392 |
| Olfr329   | 1.836638511 | -0.029387678 | 1.252084088 | -0.02347101  | 0.981274563 |    | 0.986133503 |
| Tmub2     | 584.6382009 | -0.029402512 | 0.149569416 | -0.196581046 | 0.844155404 |    | 0.884032271 |
| Brf1      | 537.5865757 | -0.029427814 | 0.195596982 | -0.150451268 | 0.880408595 |    | 0.912242102 |
| S100ppb   | 439.3929265 | -0.029910259 | 0.199977178 | -0.149568363 | 0.88110517  |    | 0.912636305 |
| Tube2cp4  | 631.6366587 | -0.029943803 | 0.152074386 | -0.196902344 | 0.843903959 |    | 0.88382324  |
| Gtf2e1    | 184.130998  | -0.030008593 | 0.214196079 | -0.140098704 | 0.888582004 |    | 0.91831632  |
| Dtd1      | 213.4253329 | -0.030180295 | 0.187202557 | -0.161217322 | 0.871922239 |    | 0.905080819 |
| Usp17la   | 15.90943156 | -0.030288716 | 0.550895415 | -0.054980882 | 0.956153694 |    | 0.968021152 |
| Phf10     | 506.2206654 | -0.030292686 | 0.162248713 | -0.186705248 | 0.851891741 |    | 0.8904667   |
| Olfr109   | 3.736867293 | -0.030398881 | 0.956405016 | -0.031784527 | 0.974643886 |    | 0.981610975 |
| Fam234a   | 1001.271602 | -0.030524066 | 0.130453975 | -0.233983412 | 0.814997856 |    | 0.861755471 |
| Pfdn1     | 721.4447898 | -0.030543673 | 0.184922468 | -0.165170154 | 0.868810056 |    | 0.903138648 |
| Ppp1r13b  | 401.0123848 | -0.030661402 | 0.229814612 | -0.133417984 | 0.893862823 |    | 0.922264323 |
| Ube2n     | 888.3602271 | -0.031062553 | 0.125329027 | -0.24784803  | 0.804251991 |    | 0.853353578 |
| Eif4a3    | 747.9108443 | -0.031256638 | 0.14763269  | -0.211718951 | 0.832326302 |    | 0.875084724 |
| Ryr2      | 6.580924486 | -0.031283487 | 0.767567811 | -0.040756643 | 0.967489905 |    | 0.975962597 |
| Cnn3      | 2590.989428 | -0.031349128 | 0.162948401 | -0.192386844 | 0.847439197 |    | 0.886654194 |
| Foxo4     | 524.5028395 | -0.031370846 | 0.250651479 | -0.125157237 | 0.900399071 |    | 0.926712372 |
| Pias2     | 567.4775535 | -0.031501795 | 0.152220956 | -0.20694782  | 0.83605061  |    | 0.877995448 |
| Tnfrsf4   | 19.39814934 | -0.031534506 | 0.522562972 | -0.060345848 | 0.951880187 |    | 0.964840563 |
| Ttll4     | 678.3309054 | -0.031733302 | 0.1712399   | -0.185314882 | 0.852982066 |    | 0.891195579 |
| Acta1     | 1.397884903 | -0.03185994  | 2.063230563 | -0.015441774 | 0.987679736 | NA |             |
| Mttr3     | 739.5778018 | -0.031890751 | 0.122348865 | -0.260654246 | 0.794359153 |    | 0.845170551 |
| Ino80e    | 278.4278276 | -0.031981202 | 0.215403237 | -0.148471316 | 0.881970821 |    | 0.913200034 |
| Ogt       | 2784.484236 | -0.032111393 | 0.232578143 | -0.138067114 | 0.890187376 |    | 0.919473758 |
| Pacsin3   | 1044.032892 | -0.032257408 | 0.273812385 | -0.117808435 | 0.906219446 |    | 0.930956862 |
| Cyp11a1   | 1.995408474 | -0.032465633 | 1.432020287 | -0.02267121  | 0.981912541 |    | 0.986658316 |
| AW549877  | 749.7394558 | -0.032662063 | 0.142926632 | -0.228523284 | 0.819239457 |    | 0.865018025 |
| Scyl2     | 637.7383735 | -0.032664928 | 0.157863565 | -0.20691873  | 0.836073329 |    | 0.877995448 |
| Slu7      | 495.9902031 | -0.032938041 | 0.197783471 | -0.166535862 | 0.867735263 |    | 0.902516672 |
| Uap1      | 472.1818844 | -0.033244182 | 0.155207734 | -0.214191532 | 0.830397699 |    | 0.873757559 |
| Insr      | 2158.432754 | -0.033725821 | 0.180237522 | -0.187118756 | 0.851567522 |    | 0.890208678 |
| Psd3      | 764.8933785 | -0.033903604 | 0.227094993 | -0.149292608 | 0.881322748 |    | 0.91280621  |
| Ccm2      | 402.0222155 | -0.034032298 | 0.159527636 | -0.21333168  | 0.831068266 |    | 0.874135847 |
| Carm1     | 665.0948424 | -0.034034377 | 0.181608009 | -0.187405703 | 0.851342551 |    | 0.890028075 |
| Olfr1044  | 3.730179185 | -0.034128967 | 0.883367719 | -0.038635063 | 0.969181347 |    | 0.977321874 |



|               |             |              |             |              |             |             |
|---------------|-------------|--------------|-------------|--------------|-------------|-------------|
| Fancc         | 116.4820689 | -0.034174284 | 0.307709751 | -0.111060128 | 0.911568666 | 0.934963638 |
| Tle4          | 243.8465586 | -0.034349234 | 0.206419059 | -0.16640534  | 0.867837972 | 0.902568432 |
| Ermap         | 13.12694091 | -0.034430071 | 0.759575024 | -0.045328071 | 0.963845813 | 0.973474141 |
| Rps8          | 6738.18214  | -0.034438256 | 0.141810888 | -0.242846345 | 0.808124432 | 0.856612902 |
| Rnf40         | 880.5844181 | -0.034446652 | 0.127569261 | -0.270023138 | 0.787142453 | 0.839172318 |
| Zfp574        | 220.9322427 | -0.034463413 | 0.247226583 | -0.139400109 | 0.889133986 | 0.918775379 |
| Tbc1d20       | 894.8820185 | -0.034470921 | 0.175490463 | -0.196426178 | 0.844276608 | 0.88410489  |
| Sprtn         | 257.9165823 | -0.035606705 | 0.194047668 | -0.183494629 | 0.854409933 | 0.892249956 |
| Gm5141        | 15.3655897  | -0.035620647 | 0.729188752 | -0.048849694 | 0.961039908 | 0.971582413 |
| Engase        | 110.9849222 | -0.035737544 | 0.339927393 | -0.105132876 | 0.916270372 | 0.938116468 |
| Edc4          | 591.6108644 | -0.035931558 | 0.178922004 | -0.200822466 | 0.840837395 | 0.88153225  |
| Zkscan6       | 95.80881626 | -0.036212891 | 0.222296935 | -0.162903239 | 0.870594621 | 0.90427692  |
| Eif4a1        | 6634.781917 | -0.036254882 | 0.13928675  | -0.260289523 | 0.794640454 | 0.845368515 |
| Eif4b         | 4595.291687 | -0.036255084 | 0.148835063 | -0.243592361 | 0.807546545 | 0.856213291 |
| Siah2         | 319.7601335 | -0.036336524 | 0.211331293 | -0.171941048 | 0.863483876 | 0.898917508 |
| 8030462N17Rik | 115.4995262 | -0.036462081 | 0.254308593 | -0.143377306 | 0.885992205 | 0.91640555  |
| Utp25         | 201.1674002 | -0.036529881 | 0.264497292 | -0.138110604 | 0.890153005 | 0.919473758 |
| Hnrnpab       | 3331.950024 | -0.037027202 | 0.156074431 | -0.237240666 | 0.81247009  | 0.859882673 |
| Zfp995        | 52.27598881 | -0.037101585 | 0.318982089 | -0.116312439 | 0.907404928 | 0.931781665 |
| Zfand5        | 1211.827773 | -0.037119117 | 0.185814023 | -0.199764886 | 0.841664464 | 0.882073879 |
| Mapk12        | 87.26753288 | -0.037182991 | 0.287740837 | -0.129223894 | 0.89718049  | 0.924455227 |
| Uhrf2         | 619.0831923 | -0.037264873 | 0.15866307  | -0.234867967 | 0.814311213 | 0.861206829 |
| Ccdc154       | 0.445406675 | -0.037481526 | 3.110601052 | -0.012049609 | 0.990386036 | NA          |
| Asph          | 797.6210223 | -0.037581182 | 0.170523191 | -0.220387515 | 0.825569368 | 0.87028856  |
| Ccdc43        | 230.1202616 | -0.038155378 | 0.178063646 | -0.214279437 | 0.830329153 | 0.873739362 |
| Dusp3         | 727.2862255 | -0.038199456 | 0.188424282 | -0.20273107  | 0.839345237 | 0.880346844 |
| Cep83         | 220.9456742 | -0.038383279 | 0.165400395 | -0.2320628   | 0.816489237 | 0.862957751 |
| Zfp652        | 698.6916445 | -0.038511328 | 0.140264297 | -0.274562589 | 0.783652312 | 0.836272313 |
| Olfr537-ps1   | 0.44645971  | -0.038710827 | 3.108520388 | -0.012453136 | 0.990064092 | NA          |
| Zdhhc21       | 205.6474646 | -0.038850041 | 0.215503185 | -0.180275947 | 0.856935938 | 0.894011619 |
| Helq          | 103.8409009 | -0.038971788 | 0.325907416 | -0.119579322 | 0.904816401 | 0.929968744 |
| Wsb1          | 1032.563167 | -0.038997617 | 0.242403293 | -0.160879075 | 0.872188643 | 0.905270745 |
| Tbc1d8b       | 269.2967307 | -0.039205569 | 0.183186726 | -0.214019703 | 0.830531693 | 0.873790687 |
| Tm9sf1        | 1010.657598 | -0.039292133 | 0.123275142 | -0.318735252 | 0.749927281 | 0.808854883 |
| Olfr715       | 2.280422815 | -0.039569685 | 1.675017637 | -0.023623444 | 0.981152972 | 0.9860885   |
| Cd2bp2        | 697.3713392 | -0.039950878 | 0.146671083 | -0.272384147 | 0.785326661 | 0.837707979 |
| Zfp24         | 510.0237242 | -0.040381013 | 0.210772112 | -0.19158613  | 0.848066408 | 0.887246023 |
| Tfeb          | 201.457407  | -0.040398716 | 0.275308335 | -0.146739895 | 0.883337328 | 0.914337266 |
| Atf2          | 602.5199719 | -0.04048457  | 0.132681045 | -0.305127006 | 0.760269424 | 0.81763015  |
| Traf3ip1      | 208.8544077 | -0.040555432 | 0.265516131 | -0.152741874 | 0.878601837 | 0.91070737  |
| Extl2         | 155.165557  | -0.040585883 | 0.204622823 | -0.198344848 | 0.842775265 | 0.882951975 |
| Arf1          | 4149.941387 | -0.040598706 | 0.141768245 | -0.286373761 | 0.774591869 | 0.829609924 |
| Nckap1        | 1871.239234 | -0.040713983 | 0.162005707 | -0.251312027 | 0.801572877 | 0.851468279 |
| Ogfod1        | 236.8632688 | -0.041001563 | 0.236665095 | -0.173247191 | 0.862457131 | 0.898336278 |
| P3h1          | 341.7445669 | -0.041010875 | 0.182077811 | -0.225238183 | 0.821793987 | 0.866898329 |
| Fam178b       | 1.761464007 | -0.041211745 | 1.585578078 | -0.025991621 | 0.979264021 | 0.984867739 |
| Adgrl3        | 8.972236748 | -0.041319713 | 0.854506966 | -0.048355034 | 0.961433295 | 0.971817884 |
| Myg1          | 503.5499608 | -0.041351354 | 0.159000805 | -0.260070091 | 0.794809708 | 0.845390311 |
| Esyt3         | 4.523047162 | -0.041368094 | 1.327050728 | -0.031172956 | 0.975131607 | 0.981812169 |
| Med24         | 452.0105617 | -0.04137776  | 0.173994983 | -0.237810078 | 0.812028402 | 0.85952193  |
| 2310011J03Rik | 283.5399947 | -0.041543985 | 0.14586474  | -0.284811703 | 0.775788406 | 0.830443347 |
| Sf3b2         | 2079.921212 | -0.041884786 | 0.140991198 | -0.297073763 | 0.766410195 | 0.822386248 |
| Ap5b1         | 50.27807267 | -0.042144583 | 0.325538812 | -0.129461009 | 0.896992876 | 0.924374935 |
| Prickle3      | 112.8727435 | -0.042259092 | 0.264371869 | -0.159847157 | 0.873001475 | 0.905948938 |
| Fam57a        | 55.16990185 | -0.042260909 | 0.295846355 | -0.14284749  | 0.88641063  | 0.916704889 |
| Zfp330        | 342.0629231 | -0.043091507 | 0.146808881 | -0.293521122 | 0.769123857 | 0.824841765 |
| Hdac5         | 1066.979968 | -0.043216292 | 0.211002014 | -0.204814596 | 0.837716983 | 0.879234078 |
| Shsal1        | 5.960927438 | -0.043953627 | 0.844826524 | -0.052026808 | 0.958507333 | 0.969885625 |
| Josd1         | 740.6229409 | -0.0439718   | 0.133789513 | -0.328664026 | 0.742409648 | 0.802829032 |
| Usp39         | 360.8017463 | -0.043972081 | 0.148333163 | -0.296441334 | 0.766893063 | 0.822781179 |
| Otud4         | 888.0759637 | -0.04407423  | 0.162147783 | -0.271815185 | 0.785764129 | 0.837964899 |
| Sppl2a        | 3152.622975 | -0.044161962 | 0.222187997 | -0.198759441 | 0.842450925 | 0.882789561 |
| Arhgap12      | 509.9540064 | -0.044224343 | 0.180409644 | -0.245132922 | 0.806353513 | 0.855214301 |
| Dcp1a         | 273.6236075 | -0.044430691 | 0.257091063 | -0.172820831 | 0.862792262 | 0.898416961 |
| Ptprk         | 1381.362604 | -0.044758154 | 0.180056977 | -0.248577726 | 0.80368744  | 0.853129731 |
| Robo1         | 152.2927716 | -0.044972475 | 0.412333764 | -0.109068135 | 0.913148448 | 0.935950221 |

|               |             |              |             |              |             |             |
|---------------|-------------|--------------|-------------|--------------|-------------|-------------|
| Gm6170        | 3.433833215 | -0.045052603 | 1.091450055 | -0.04127775  | 0.967074471 | 0.975832233 |
| F8a           | 154.2822575 | -0.045216365 | 0.251605247 | -0.179711536 | 0.857379037 | 0.894313086 |
| Hdac10        | 276.824862  | -0.045361504 | 0.17022591  | -0.266478259 | 0.789870901 | 0.841344525 |
| Gm11400       | 14.42245274 | -0.045657956 | 0.594743947 | -0.076769098 | 0.938807235 | 0.954939483 |
| Rbck1         | 1282.307773 | -0.045700727 | 0.163413565 | -0.279662991 | 0.779736074 | 0.833432487 |
| Bloc1s3       | 123.574779  | -0.045860394 | 0.226958405 | -0.202065192 | 0.839865759 | 0.880730237 |
| Folr1         | 3.739303366 | -0.045881093 | 1.317182928 | -0.034832742 | 0.972213112 | 0.979776013 |
| Akirin2       | 474.6772201 | -0.046107915 | 0.169997741 | -0.271226634 | 0.786216729 | 0.838290249 |
| Wrn           | 227.3142695 | -0.046338537 | 0.166318549 | -0.278613161 | 0.780541712 | 0.833908322 |
| Primpol       | 161.3569574 | -0.046481527 | 0.185142949 | -0.251057506 | 0.801769649 | 0.851624235 |
| Stox2         | 26.45188659 | -0.046578947 | 0.682464081 | -0.068251134 | 0.945585723 | 0.960401871 |
| Bcorl1        | 177.8620184 | -0.046697768 | 0.280909901 | -0.166237531 | 0.867970025 | 0.902650703 |
| Iars          | 831.2909908 | -0.046726581 | 0.247627098 | -0.188697366 | 0.850330016 | 0.889187641 |
| Olfr1226      | 3.197283551 | -0.046896302 | 1.123984544 | -0.041723262 | 0.96671931  | 0.975584402 |
| Cacna1s       | 0.999220792 | -0.046982468 | 1.967791465 | -0.023875735 | 0.980951729 | NA          |
| Crebpb        | 726.5155076 | -0.046990404 | 0.17117411  | -0.27451817  | 0.783686442 | 0.836272313 |
| Prmt7         | 257.2593341 | -0.046996044 | 0.220434264 | -0.213197548 | 0.831172881 | 0.874141596 |
| Thoc1         | 507.0311842 | -0.047306428 | 0.15618861  | -0.302880143 | 0.761981205 | 0.818851209 |
| Ccdc122       | 85.07276951 | -0.047411245 | 0.374936441 | -0.126451419 | 0.899374602 | 0.925976687 |
| Wipf3         | 200.05855   | -0.047608196 | 0.375175967 | -0.126895644 | 0.899022995 | 0.925838974 |
| Ap1m1         | 629.1000722 | -0.048082092 | 0.169339158 | -0.283939597 | 0.776456671 | 0.830949989 |
| Tbkbp1        | 165.5570916 | -0.048553615 | 0.229283816 | -0.211762068 | 0.832292663 | 0.875084724 |
| Ppip5k2       | 1195.866068 | -0.048645929 | 0.200253273 | -0.242922018 | 0.808065809 | 0.856612902 |
| Wdr5b         | 50.98150468 | -0.048705132 | 0.2899354   | -0.167986151 | 0.866594174 | 0.901494843 |
| Fam118a       | 90.7465128  | -0.048774003 | 0.377633626 | -0.129156937 | 0.897233347 | 0.924455227 |
| Zfr2          | 46.71045391 | -0.048986243 | 0.387695479 | -0.12635237  | 0.899453003 | 0.925976687 |
| Fchsd2        | 421.2778407 | -0.049252956 | 0.15926645  | -0.309248783 | 0.757132288 | 0.814994408 |
| Kcnmb4        | 5.303246953 | -0.049527949 | 1.020186217 | -0.04854795  | 0.961279551 | 0.971767895 |
| Atp13a3       | 2243.712776 | -0.049692264 | 0.144452115 | -0.344005094 | 0.730842455 | 0.793643045 |
| Marveld1      | 581.4489818 | -0.049784958 | 0.328574428 | -0.151518053 | 0.879567071 | 0.911541606 |
| Rpp14         | 240.2124976 | -0.049941582 | 0.236058832 | -0.211564132 | 0.832447094 | 0.875157749 |
| Zmynd8        | 777.7310504 | -0.050193325 | 0.174502514 | -0.287636689 | 0.773624858 | 0.829064406 |
| Klhl42        | 244.3070661 | -0.050322043 | 0.195004364 | -0.258055985 | 0.7963637   | 0.846515049 |
| Rpp30         | 90.85126832 | -0.050482322 | 0.252040784 | -0.200294258 | 0.841250453 | 0.88172048  |
| Strip1        | 380.3932274 | -0.050771407 | 0.159467323 | -0.31838126  | 0.750195751 | 0.809063886 |
| Ppp6r3        | 1240.236018 | -0.050848398 | 0.156759896 | -0.324371213 | 0.745657011 | 0.805418429 |
| Gpr21         | 2.535540696 | -0.050883594 | 1.221471449 | -0.04165762  | 0.966771639 | 0.975584402 |
| Qsox1         | 7647.326341 | -0.051044952 | 0.254890616 | -0.200262185 | 0.841275536 | 0.88172048  |
| Nt5m          | 188.4087818 | -0.051076393 | 0.219791141 | -0.232386042 | 0.816238189 | 0.862799395 |
| D430041D05Rik | 0.884752272 | -0.051532969 | 2.107067635 | -0.024457197 | 0.980487925 | NA          |
| Nudt16l1      | 393.752827  | -0.051716326 | 0.207480131 | -0.249259174 | 0.803160309 | 0.852729461 |
| Csrp2         | 725.365787  | -0.051810621 | 0.217076553 | -0.238674422 | 0.811358052 | 0.859038687 |
| Rbm28         | 720.667337  | -0.051895703 | 0.155624738 | -0.333466928 | 0.73878185  | 0.80012407  |
| H1f5          | 7.053657208 | -0.051987343 | 0.979826889 | -0.053057682 | 0.957685949 | 0.969284615 |
| Arl13b        | 129.4076247 | -0.05208364  | 0.216505948 | -0.240564474 | 0.809892687 | 0.85784719  |
| Gm3468        | 0.999501368 | -0.052162348 | 1.967909393 | -0.026506479 | 0.978853366 | NA          |
| Tent4a        | 309.2180763 | -0.05222252  | 0.216943442 | -0.240719514 | 0.809772514 | 0.857773196 |
| Armcx5        | 77.72234585 | -0.052233864 | 0.310519356 | -0.168214519 | 0.866414519 | 0.901472977 |
| Ddx46         | 935.7938596 | -0.052519133 | 0.186297084 | -0.281910654 | 0.77801202  | 0.832092153 |
| Brip1         | 70.50243523 | -0.052703951 | 0.570474575 | -0.092386152 | 0.926391241 | 0.945695682 |
| Mss51         | 26.38357928 | -0.052742307 | 0.399089931 | -0.132156446 | 0.89486055  | 0.922846933 |
| Ddx1          | 1290.324972 | -0.052754367 | 0.204984088 | -0.257358349 | 0.796902153 | 0.846981789 |
| Lcp1          | 1947.628381 | -0.052799885 | 0.26944363  | -0.195958929 | 0.844642312 | 0.88443352  |
| Luc7l         | 1122.819363 | -0.052900389 | 0.259857274 | -0.203574785 | 0.838685799 | 0.879871724 |
| Efl1          | 271.4358997 | -0.053043939 | 0.155478398 | -0.341165976 | 0.732978636 | 0.795304212 |
| Zfp503        | 26.58412745 | -0.053047514 | 0.485498709 | -0.109263964 | 0.912993128 | 0.935950221 |
| Gart          | 797.5169211 | -0.053246612 | 0.121421349 | -0.438527596 | 0.66100387  | 0.735129101 |
| Gm37601       | 3.048585526 | -0.053634824 | 1.088275356 | -0.049284241 | 0.960692779 | 0.971289912 |
| Med12         | 906.6233131 | -0.053742298 | 0.380267135 | -0.141327749 | 0.887611029 | 0.917479708 |
| Rrp1          | 1623.728965 | -0.053932248 | 0.11735265  | -0.45957418  | 0.645821896 | 0.721918017 |
| Sin3a         | 523.3603254 | -0.053979523 | 0.148175768 | -0.364293866 | 0.71563858  | 0.780363727 |
| Eif3m         | 1270.035843 | -0.054027945 | 0.142867124 | -0.378169193 | 0.705304909 | 0.771711578 |
| Ckm           | 2.779016989 | -0.054377692 | 1.087934021 | -0.049982527 | 0.960136312 | 0.971015237 |
| Dgkh          | 79.72252751 | -0.054427543 | 0.265830079 | -0.204745614 | 0.83777088  | 0.879236516 |
| Dnmt3l        | 1.794891011 | -0.054458032 | 1.812540559 | -0.030045138 | 0.976031054 | 0.982543691 |
| Tnpo1         | 1308.844179 | -0.054618784 | 0.144787421 | -0.377234316 | 0.70599948  | 0.77232284  |

|           |             |              |             |              |                |             |
|-----------|-------------|--------------|-------------|--------------|----------------|-------------|
| Gk        | 1848.60975  | -0.054771336 | 0.127434262 | -0.429800707 | 0.667340618    | 0.740341177 |
| Trip12    | 2390.568561 | -0.054897555 | 0.153179378 | -0.358387375 | 0.720053439    | 0.784325029 |
| Rps15     | 5128.50223  | -0.054914309 | 0.138293156 | -0.397086237 | 0.691303869    | 0.760885038 |
| Zfp772    | 92.44282514 | -0.054986804 | 0.348165693 | -0.157932862 | 0.874509703    | 0.907374446 |
| Sema6c    | 43.42458496 | -0.055647889 | 0.439581036 | -0.126593015 | 0.899262526    | 0.925976687 |
| Usp5      | 1222.042528 | -0.055985067 | 0.128616307 | -0.435287469 | 0.66335378     | 0.737165454 |
| Fam227a   | 70.34426991 | -0.056001138 | 0.345754079 | -0.161968121 | 0.871330958    | 0.904766121 |
| Abca17    | 0.878751827 | -0.056252669 | 2.317800094 | -0.024269854 | 0.980637359 NA |             |
| Spata2    | 215.495724  | -0.056833507 | 0.218779392 | -0.259775414 | 0.795037017    | 0.845579329 |
| Ncoa6     | 694.7342477 | -0.056945361 | 0.15756784  | -0.36140218  | 0.717798818    | 0.782319029 |
| Aldh1l2   | 38.9669187  | -0.057032721 | 0.4700849   | -0.121324299 | 0.903434174    | 0.928991242 |
| Arntl2    | 153.6716588 | -0.057115268 | 0.240691746 | -0.237296329 | 0.81242691     | 0.859882673 |
| Inafm2    | 278.8253786 | -0.05722755  | 0.227263038 | -0.251811954 | 0.801186417    | 0.851163834 |
| Rell2     | 10.28237863 | -0.057308221 | 0.784714715 | -0.073030644 | 0.941781732    | 0.957165552 |
| Map11     | 437.4751641 | -0.057362728 | 0.167422943 | -0.342621669 | 0.731883098    | 0.794469472 |
| Tpra1     | 541.8458896 | -0.057873005 | 0.170340335 | -0.339749276 | 0.73404535     | 0.796106948 |
| Ddx19a    | 444.5229143 | -0.058244795 | 0.155357466 | -0.374908243 | 0.707728708    | 0.773866911 |
| Ascc1     | 283.2365589 | -0.058355229 | 0.164115718 | -0.355573673 | 0.722159863    | 0.786117192 |
| Smarca4   | 1034.252373 | -0.058627165 | 0.162752089 | -0.360223732 | 0.718679829    | 0.783179092 |
| Nup133    | 251.4415377 | -0.058720411 | 0.335811023 | -0.174861474 | 0.861188483    | 0.897234081 |
| Id4       | 16.87544573 | -0.059067513 | 0.493361301 | -0.119724657 | 0.904701267    | 0.929968744 |
| Fam184b   | 6.668685617 | -0.059208034 | 0.792482522 | -0.0747121   | 0.94044378     | 0.956090736 |
| Ss18      | 678.4792948 | -0.059334485 | 0.152684319 | -0.388608896 | 0.697565485    | 0.765848557 |
| Chrna1    | 4.362999948 | -0.059544163 | 1.05269434  | -0.056563582 | 0.954892845    | 0.966974352 |
| Recq14    | 48.06157482 | -0.059688872 | 0.432580647 | -0.137983222 | 0.890253677    | 0.919486532 |
| Zscan29   | 354.2588595 | -0.059753243 | 0.166553879 | -0.358762243 | 0.719772961    | 0.784169826 |
| Pisd-ps1  | 167.9463174 | -0.059827929 | 0.217608119 | -0.274934266 | 0.783366741    | 0.836245222 |
| Gps2      | 433.7107815 | -0.059879844 | 0.195713871 | -0.305956055 | 0.759638105    | 0.817054285 |
| Ptdss2    | 250.9892249 | -0.060252882 | 0.29268237  | -0.205864407 | 0.836896829    | 0.878589639 |
| Polr1e    | 95.90231951 | -0.060447893 | 0.215511153 | -0.280486148 | 0.779104552    | 0.832947096 |
| Nmt2      | 417.559278  | -0.060472924 | 0.16590476  | -0.364503853 | 0.715481797    | 0.780242671 |
| Gm1043    | 1.058733708 | -0.060500155 | 1.760943361 | -0.034356673 | 0.972592733 NA |             |
| Hmcn2     | 39.59039887 | -0.060724543 | 0.419242073 | -0.144843629 | 0.884834335    | 0.915608846 |
| Pgap2     | 522.191257  | -0.061131912 | 0.197693053 | -0.309226404 | 0.75714931     | 0.814994408 |
| Csl       | 1.024314213 | -0.061224687 | 1.97460893  | -0.031005981 | 0.97526477 NA  |             |
| Uvrag     | 503.5840893 | -0.061347473 | 0.185771643 | -0.330230558 | 0.741225759    | 0.802159381 |
| Lrif1     | 229.2448271 | -0.061396342 | 0.189762614 | -0.323542878 | 0.74628414     | 0.805894218 |
| Lrpap1    | 946.9808907 | -0.061410413 | 0.247509171 | -0.248113688 | 0.804046446    | 0.853309885 |
| Tsta3     | 441.7523376 | -0.061550398 | 0.186570776 | -0.32990375  | 0.74147269     | 0.802242845 |
| Chd2      | 847.522104  | -0.061615583 | 0.141199762 | -0.436371718 | 0.662567056    | 0.736579274 |
| Gm4924    | 40.72622401 | -0.061628123 | 0.487833641 | -0.126330202 | 0.89947055     | 0.925976687 |
| Fzd4      | 423.338024  | -0.061770333 | 0.212380783 | -0.290847092 | 0.771168267    | 0.826743593 |
| Dpf2      | 548.9906156 | -0.062076513 | 0.139487783 | -0.445031898 | 0.656296703    | 0.731181949 |
| Tmem131   | 604.2020012 | -0.062346018 | 0.207122656 | -0.301010129 | 0.76340677     | 0.819993887 |
| Hspa1a    | 39.64906252 | -0.062800771 | 0.612946945 | -0.102457107 | 0.918393857    | 0.939613424 |
| Rpl27-ps3 | 2411.20495  | -0.062829016 | 0.159916243 | -0.392887021 | 0.694402928    | 0.763507328 |
| Sall1     | 654.3208126 | -0.062994572 | 0.229653337 | -0.274302882 | 0.78385187     | 0.836396487 |
| Erc1      | 489.6775934 | -0.063134132 | 0.234083329 | -0.269707936 | 0.787384955    | 0.839325874 |
| Gm12317   | 0.469822864 | -0.063763234 | 3.053417404 | -0.02088258  | 0.983339323 NA |             |
| Gnl3      | 736.5575791 | -0.06376952  | 0.13941627  | -0.457403718 | 0.647380892    | 0.72332871  |
| Ccl9      | 1529.430244 | -0.06407687  | 0.212625002 | -0.301360937 | 0.763139278    | 0.819837319 |
| Zfp974    | 68.52639352 | -0.064126155 | 0.356836459 | -0.179707407 | 0.857382278    | 0.894313086 |
| Ifitm1    | 97.45303687 | -0.064345799 | 0.227538835 | -0.282790404 | 0.777337511    | 0.831631621 |
| Sec24b    | 536.7704885 | -0.064415902 | 0.147094379 | -0.437922253 | 0.661442643    | 0.735521113 |
| Gm15694   | 2.707930106 | -0.064686895 | 1.310454081 | -0.049501159 | 0.960519914    | 0.971269506 |
| Olfr145   | 1.429678863 | -0.06508106  | 1.603764568 | -0.040580183 | 0.967630583 NA |             |
| Cdk16     | 842.4443861 | -0.065114689 | 0.167363309 | -0.38906191  | 0.69723035     | 0.765776511 |
| Olfr1105  | 0.832753009 | -0.065220114 | 2.304326769 | -0.028303327 | 0.977420227 NA |             |
| Sesn3     | 441.6056197 | -0.06524592  | 0.269176556 | -0.242390797 | 0.808477365    | 0.856853238 |
| Tex13b    | 1.050997213 | -0.065354394 | 2.14069682  | -0.030529496 | 0.97564477 NA  |             |
| Krt222    | 1.793754351 | -0.065410212 | 1.658350724 | -0.039442931 | 0.968537253    | 0.976730144 |
| Sgca      | 0.403203121 | -0.065470956 | 2.739931468 | -0.023895107 | 0.980936277 NA |             |
| Noc3l     | 214.1870027 | -0.065567707 | 0.227854527 | -0.287761267 | 0.773529488    | 0.829014316 |
| Nup214    | 375.9462249 | -0.065994613 | 0.194572949 | -0.339176713 | 0.734476611    | 0.796454709 |
| Esf1      | 269.3464036 | -0.066076437 | 0.172057884 | -0.38403609  | 0.700951699    | 0.768836861 |
| Gm10175   | 2111.63801  | -0.066216853 | 0.132535885 | -0.49961452  | 0.617346532    | 0.697387166 |



|                |             |              |             |              |             |             |
|----------------|-------------|--------------|-------------|--------------|-------------|-------------|
| Ighmbp2        | 120.1432443 | -0.0664248   | 0.221394417 | -0.300029248 | 0.764154846 | 0.820471723 |
| Gm2163         | 11.92615174 | -0.066522319 | 0.90932853  | -0.073155429 | 0.941682434 | 0.957121691 |
| Gm10136        | 0.862739817 | -0.066563369 | 2.011698839 | -0.033088138 | 0.973604302 | NA          |
| Emc10          | 860.8773143 | -0.067120144 | 0.191987722 | -0.349606442 | 0.726634076 | 0.790129973 |
| Myh11          | 69.27352295 | -0.067687688 | 0.511688637 | -0.13228296  | 0.894760485 | 0.922846933 |
| Vmn1r-ps62     | 0.833758996 | -0.067785047 | 2.05726877  | -0.032949048 | 0.97371522  | NA          |
| Haus3          | 124.0942452 | -0.068014641 | 0.282539123 | -0.240726455 | 0.809767134 | 0.857773196 |
| Cfap126        | 54.27048074 | -0.068107657 | 0.344888835 | -0.197477129 | 0.843454177 | 0.883515012 |
| Tectb          | 1.597180096 | -0.068141933 | 1.853787303 | -0.036758226 | 0.970677782 | NA          |
| Ifitm10        | 18.25263633 | -0.068159645 | 0.460699781 | -0.147948072 | 0.882383749 | 0.913461146 |
| Cct4           | 1683.058845 | -0.068330641 | 0.156081617 | -0.437787882 | 0.661540056 | 0.735581456 |
| Zfp781         | 20.862136   | -0.068350982 | 0.869709835 | -0.078590559 | 0.937358297 | 0.953750179 |
| Gm49383        | 24.55915277 | -0.068379351 | 0.446443511 | -0.15316462  | 0.878268457 | 0.910495687 |
| Pcdh10         | 1.169081661 | -0.068491973 | 1.740564353 | -0.03935044  | 0.968610992 | NA          |
| Paxip1         | 358.340217  | -0.068603455 | 0.278604994 | -0.246239142 | 0.805497117 | 0.854359165 |
| Tpr            | 1620.899601 | -0.068727547 | 0.131813281 | -0.521400776 | 0.602087611 | 0.683868236 |
| Lmtk2          | 348.371715  | -0.069259181 | 0.227535818 | -0.304388036 | 0.760832282 | 0.817822745 |
| Tm9sf3         | 2846.419274 | -0.069336016 | 0.176567663 | -0.392688078 | 0.694549877 | 0.76361965  |
| Ints12         | 171.0017838 | -0.069519964 | 0.229896722 | -0.302396499 | 0.762349823 | 0.819144068 |
| Stard13        | 536.6149876 | -0.069532449 | 0.183158979 | -0.379628939 | 0.704220876 | 0.770921306 |
| Fbxw9          | 582.6622827 | -0.069590247 | 0.137136793 | -0.50745132  | 0.611838185 | 0.692558089 |
| Enpp6          | 39.56437954 | -0.069748884 | 0.418040809 | -0.16684707  | 0.867490381 | 0.90237208  |
| Smoc1          | 1922.505045 | -0.06980555  | 0.347866526 | -0.200667626 | 0.840958475 | 0.881604974 |
| AEKR01077154.1 | 61.54221073 | -0.069997831 | 0.290077789 | -0.241307102 | 0.809317107 | 0.857450627 |
| Aga            | 309.3497412 | -0.070020546 | 0.168062859 | -0.416633073 | 0.676946814 | 0.748325865 |
| Zrsr2          | 212.1033933 | -0.070117748 | 0.253319251 | -0.27679597  | 0.781936776 | 0.835245952 |
| Maats1         | 7.021814328 | -0.070136821 | 0.729950996 | -0.096084288 | 0.92345363  | 0.943268789 |
| B230303A05Rik  | 0.471230931 | -0.070188577 | 3.040954563 | -0.0230811   | 0.981585582 | NA          |
| Gm28503        | 2.541650571 | -0.070273746 | 1.215565362 | -0.057811573 | 0.95389872  | 0.966198162 |
| Aopep          | 742.9918184 | -0.070332107 | 0.182557509 | -0.385260008 | 0.700044788 | 0.768156523 |
| Rpl15          | 3935.31772  | -0.070817478 | 0.147227496 | -0.481007149 | 0.630511418 | 0.709080985 |
| H3f3b          | 5449.39752  | -0.070837834 | 0.16448502  | -0.430664347 | 0.666712446 | 0.739740565 |
| Ddx42          | 980.661619  | -0.071125127 | 0.135967281 | -0.523104722 | 0.60090138  | 0.682807887 |
| Lcmt2          | 177.8883212 | -0.071679479 | 0.223724083 | -0.320392327 | 0.748670942 | 0.8078576   |
| Prg4           | 1154.422561 | -0.071712407 | 0.470253371 | -0.152497381 | 0.878794656 | 0.910851854 |
| Dennd1b        | 344.6048974 | -0.071834903 | 0.178254121 | -0.402991543 | 0.686954446 | 0.757271218 |
| Dek            | 903.5782286 | -0.071963182 | 0.159199752 | -0.452030743 | 0.651246835 | 0.726790786 |
| Gstm2-ps1      | 0.858345198 | -0.072265887 | 2.01077281  | -0.03593936  | 0.971330712 | NA          |
| Ndor1          | 590.7115964 | -0.072295221 | 0.23258578  | -0.310832505 | 0.755927958 | 0.814142386 |
| Trpm1          | 1.570949586 | -0.07232147  | 1.789004765 | -0.040425532 | 0.967753875 | NA          |
| Atf7           | 724.8859774 | -0.07232414  | 0.213086872 | -0.339411523 | 0.734299739 | 0.796332186 |
| Olfir622       | 0.467535989 | -0.072340845 | 3.057307553 | -0.023661618 | 0.981122521 | NA          |
| Sugp1          | 412.1655062 | -0.07272382  | 0.160986041 | -0.45173991  | 0.651456363 | 0.726929447 |
| Vps39          | 566.953923  | -0.072889058 | 0.257887071 | -0.282639442 | 0.777453242 | 0.831651056 |
| Kmt2d          | 1708.536255 | -0.072939583 | 0.168738313 | -0.432264502 | 0.665549184 | 0.738738361 |
| Ddx6           | 1993.655712 | -0.073277068 | 0.112934751 | -0.648844289 | 0.516439027 | 0.605020103 |
| Irf2bp1        | 397.165091  | -0.07340357  | 0.198827911 | -0.36918142  | 0.711992504 | 0.777432153 |
| Rmnd5b         | 292.9251386 | -0.073489393 | 0.210425998 | -0.349241033 | 0.726908364 | 0.790377816 |
| Wipf2          | 313.6341569 | -0.073578278 | 0.161360534 | -0.45598683  | 0.648399449 | 0.724229431 |
| Sntb1          | 1533.729574 | -0.073677075 | 0.176568638 | -0.417271581 | 0.676479773 | 0.747949099 |
| Chd8           | 1005.065302 | -0.073995752 | 0.207767783 | -0.35614642  | 0.721730915 | 0.785800781 |
| Kcnb2          | 3.993358197 | -0.07431783  | 0.89095859  | -0.083413337 | 0.933522884 | 0.950642024 |
| Mad1l1         | 194.3498635 | -0.074472298 | 0.260813606 | -0.285538393 | 0.775231695 | 0.830003764 |
| AC174929.2     | 2.961425239 | -0.07452194  | 1.308287238 | -0.056961451 | 0.954575903 | 0.966768252 |
| Atp2a2         | 3290.582543 | -0.074633339 | 0.193823261 | -0.385058731 | 0.700193903 | 0.768239519 |
| Zfr            | 923.5682395 | -0.074756683 | 0.152452111 | -0.490361743 | 0.623877943 | 0.703162955 |
| Cdc16          | 494.1616264 | -0.074904056 | 0.203871128 | -0.367408849 | 0.713314072 | 0.778476301 |
| Rps23-ps1      | 3064.681893 | -0.075002115 | 0.142732056 | -0.525474913 | 0.599253089 | 0.681525461 |
| Tmed1          | 243.5035819 | -0.075030938 | 0.180951398 | -0.414646908 | 0.678400404 | 0.749635085 |
| Nkapd1         | 214.44764   | -0.075083251 | 0.180856353 | -0.415154072 | 0.678029118 | 0.74932195  |
| Gm15045        | 1.273476649 | -0.0754804   | 2.53051752  | -0.029828049 | 0.976204189 | NA          |
| Zfp512b        | 1015.150497 | -0.075532667 | 0.188877309 | -0.399903341 | 0.689227711 | 0.759139038 |
| Rab14          | 2653.246252 | -0.075561322 | 0.155418843 | -0.48617864  | 0.626840514 | 0.705712526 |
| Snrnp25        | 68.14530486 | -0.07564897  | 0.392795426 | -0.192591269 | 0.847279083 | 0.886649792 |
| Cep350         | 696.3142084 | -0.075768689 | 0.234673204 | -0.322868942 | 0.746794498 | 0.806241061 |
| Olfir24        | 0.859628394 | -0.075799747 | 2.283857517 | -0.03318935  | 0.973523591 | NA          |

|               |             |              |             |              |                |             |
|---------------|-------------|--------------|-------------|--------------|----------------|-------------|
| Bms1          | 561.0324313 | -0.076078157 | 0.122326633 | -0.621926355 | 0.533990294    | 0.62135462  |
| Zfp868        | 141.7755751 | -0.076690093 | 0.243551699 | -0.314882193 | 0.752851103    | 0.811440224 |
| Tjp3          | 617.6616966 | -0.076805311 | 0.261175469 | -0.294075516 | 0.7687002      | 0.824460586 |
| Purg          | 49.8367445  | -0.077076397 | 0.358462516 | -0.215019404 | 0.82975219     | 0.873446781 |
| Mndal         | 126.5488168 | -0.077266749 | 0.283849447 | -0.272210322 | 0.785460306    | 0.837745701 |
| Syne1         | 651.7446667 | -0.077638392 | 0.212093785 | -0.366056893 | 0.714322623    | 0.779259553 |
| Rpn2          | 3281.005269 | -0.077696419 | 0.185195358 | -0.419537617 | 0.674823269    | 0.746456468 |
| Gm9887        | 1.667538829 | -0.077707438 | 1.721452231 | -0.04514063  | 0.963995216    | 0.973474141 |
| Olfr1431      | 0.851222345 | -0.07787755  | 2.644764544 | -0.029445929 | 0.976508942 NA |             |
| Smg1          | 1247.820268 | -0.078059532 | 0.176810724 | -0.441486411 | 0.658860897    | 0.733607248 |
| Ddx3x         | 2867.020328 | -0.07846218  | 0.163808319 | -0.478987761 | 0.631947336    | 0.710297733 |
| Actr1a        | 1025.071665 | -0.078540384 | 0.145736035 | -0.538922199 | 0.589940539    | 0.672819529 |
| Atrip         | 196.190101  | -0.078688339 | 0.227825402 | -0.345388787 | 0.729802106    | 0.792765789 |
| Cdkl2         | 101.8130585 | -0.078695294 | 0.331917684 | -0.237092803 | 0.812584796    | 0.859950686 |
| Fancf         | 82.2983708  | -0.078735386 | 0.294699431 | -0.267171828 | 0.789336866    | 0.84103843  |
| Degs2         | 9.054614493 | -0.07881634  | 0.812650504 | -0.096986761 | 0.922736908    | 0.942812035 |
| Cbx1          | 709.7422146 | -0.079171613 | 0.151512449 | -0.522541966 | 0.601293035    | 0.683207389 |
| Sike1         | 375.4807732 | -0.079751988 | 0.261661103 | -0.304791147 | 0.760525225    | 0.817658748 |
| Nek4          | 348.4926876 | -0.079812541 | 0.25703081  | -0.31051741  | 0.756167522    | 0.814250815 |
| Gm7803        | 0.46152152  | -0.07985411  | 3.077953839 | -0.025943895 | 0.979302089 NA |             |
| Taf4          | 423.4739495 | -0.080620007 | 0.189921389 | -0.424491456 | 0.671207435    | 0.743608955 |
| Ift27         | 200.1104637 | -0.080854493 | 0.174549904 | -0.463217057 | 0.643208791    | 0.719893873 |
| Ubxn7         | 597.5431716 | -0.080944333 | 0.139401822 | -0.580654769 | 0.561473151    | 0.64627603  |
| Coq6          | 295.1286657 | -0.080970564 | 0.169942983 | -0.476457234 | 0.633748668    | 0.711876345 |
| Rad52         | 198.0160442 | -0.080977614 | 0.183643182 | -0.440950833 | 0.659248592    | 0.733847208 |
| Nars          | 2453.12921  | -0.081159034 | 0.19639256  | -0.413249024 | 0.679424174    | 0.750658477 |
| Zscan20       | 56.76810481 | -0.081499149 | 0.378055888 | -0.215574341 | 0.829319559    | 0.87326991  |
| Crebrf        | 510.5549352 | -0.081577493 | 0.148484391 | -0.549401136 | 0.582730195    | 0.666022014 |
| Enpp3         | 1670.22286  | -0.081649675 | 0.312602095 | -0.261193628 | 0.793943192    | 0.844890358 |
| Gsdma2        | 3.898583378 | -0.081736762 | 1.104624438 | -0.073995069 | 0.941014309    | 0.956596625 |
| Top3b         | 592.7215848 | -0.081802804 | 0.162858158 | -0.502294786 | 0.615460176    | 0.695826321 |
| Copa          | 4026.3004   | -0.082136259 | 0.120928834 | -0.679211537 | 0.497003838    | 0.58680805  |
| 9130208D14Rik | 2.322795557 | -0.082301169 | 1.297765767 | -0.063417583 | 0.949433986    | 0.96326662  |
| Spout1        | 307.7402831 | -0.08231489  | 0.203283378 | -0.40492681  | 0.685531311    | 0.755995717 |
| Ist1          | 1299.727435 | -0.08252587  | 0.105082497 | -0.785343629 | 0.432252122    | 0.523778106 |
| Sde2          | 256.4937577 | -0.082620811 | 0.195659685 | -0.422267934 | 0.672829461    | 0.74487932  |
| Spcs2         | 1884.506724 | -0.082917227 | 0.20952753  | -0.395734284 | 0.692301061    | 0.761687544 |
| Rnf168        | 262.0109359 | -0.082957671 | 0.157548292 | -0.526553921 | 0.598503398    | 0.680899962 |
| Crtc1         | 244.9434951 | -0.083366257 | 0.312574866 | -0.266708126 | 0.789693897    | 0.841261111 |
| Gm15914       | 2.696505573 | -0.083402602 | 1.264800209 | -0.065941325 | 0.947424539    | 0.96169655  |
| Nudt15        | 36.78430182 | -0.083531077 | 0.379943799 | -0.219851138 | 0.825987092    | 0.870567415 |
| Thap3         | 203.8804349 | -0.083766447 | 0.226266966 | -0.370210679 | 0.71122552     | 0.776893232 |
| Ube2l6        | 1357.205381 | -0.084166243 | 0.29013347  | -0.290094912 | 0.771743628    | 0.827305731 |
| Atf5          | 5508.401626 | -0.084500569 | 0.29331227  | -0.288090808 | 0.773277228    | 0.828796064 |
| Snrnp200      | 1489.189124 | -0.084609614 | 0.173481444 | -0.48771564  | 0.625751272    | 0.704983326 |
| Dctn6         | 352.5109213 | -0.084610893 | 0.201051542 | -0.4208418   | 0.673870607    | 0.745644584 |
| Gm48128       | 88.48049877 | -0.08467771  | 1.24462483  | -0.068034727 | 0.94575799     | 0.960462395 |
| Alg6          | 158.4506103 | -0.085181928 | 0.233995262 | -0.364032703 | 0.715833589    | 0.780526449 |
| Zfp398        | 204.6181438 | -0.085247081 | 0.176750249 | -0.482302469 | 0.629591094    | 0.708186128 |
| Esrra         | 543.5285358 | -0.085297655 | 0.2368831   | -0.360083327 | 0.718784821    | 0.78324344  |
| Ltbp1         | 45.54008251 | -0.08545673  | 0.344768373 | -0.247867081 | 0.804237251    | 0.853353578 |
| Ppp1r3e       | 61.33665288 | -0.085621646 | 0.344602309 | -0.248465097 | 0.803774572    | 0.853169099 |
| B4gat1        | 339.1890073 | -0.08570262  | 0.163344871 | -0.524672857 | 0.599810629    | 0.68188661  |
| E2f6          | 303.4543486 | -0.085807672 | 0.193224451 | -0.444082889 | 0.656982657    | 0.731850518 |
| Gnb2          | 2531.078945 | -0.085889217 | 0.2082289   | -0.412475008 | 0.679991295    | 0.751086228 |
| Pigb          | 225.4089365 | -0.085916819 | 0.198903176 | -0.431952976 | 0.665775591    | 0.738911806 |
| Rpl29         | 4321.310232 | -0.086050477 | 0.143274232 | -0.600599817 | 0.54810656     | 0.633921832 |
| Xpr1          | 561.3170776 | -0.086142085 | 0.197637887 | -0.435858157 | 0.662939645    | 0.736849333 |
| Socs7         | 265.1800148 | -0.086312656 | 0.236574546 | -0.364843378 | 0.715228323    | 0.78001615  |
| Gm14122       | 2.653592274 | -0.086522307 | 1.173878986 | -0.073706326 | 0.941244065    | 0.956733176 |
| E2f4          | 432.1277563 | -0.086527003 | 0.145713425 | -0.593816269 | 0.552635007    | 0.63800339  |
| Ccdc191       | 104.0394438 | -0.086554682 | 0.259843414 | -0.333103235 | 0.739056357    | 0.800232246 |
| Klhl26        | 124.7418953 | -0.086590187 | 0.269495091 | -0.321305247 | 0.747979081    | 0.807366555 |
| Gm28035       | 132.1554508 | -0.08661135  | 0.325490367 | -0.266094972 | 0.790166067    | 0.841606342 |
| Tnpo2         | 918.6884752 | -0.086793186 | 0.144370429 | -0.60118396  | 0.547717466    | 0.633651423 |
| Gstm1         | 48784.16894 | -0.0868834   | 0.291760591 | -0.297790047 | 0.765863412    | 0.821956057 |

|               |             |              |             |              |             |             |
|---------------|-------------|--------------|-------------|--------------|-------------|-------------|
| Eng           | 727.802532  | -0.086922631 | 0.225643159 | -0.385221657 | 0.700073199 | 0.768156523 |
| Olfr1247      | 20.43874322 | -0.086988876 | 0.44134794  | -0.19709818  | 0.843750708 | 0.883717028 |
| Gm2000        | 1431.27734  | -0.08709728  | 0.184351901 | -0.472451214 | 0.636604756 | 0.713955522 |
| Tspyl1        | 467.7850088 | -0.087098244 | 0.17148338  | -0.5079107   | 0.611515971 | 0.692377251 |
| Map4k5        | 412.7815628 | -0.08719714  | 0.184798725 | -0.471849251 | 0.637034394 | 0.714249414 |
| Nudcd3        | 525.2784887 | -0.087365121 | 0.169298    | -0.516043433 | 0.605824075 | 0.687347852 |
| Zfp133-ps     | 3.618065045 | -0.087409672 | 0.99042265  | -0.08825492  | 0.929674068 | 0.948081803 |
| Lpar3         | 1.031571828 | -0.087487562 | 1.780369573 | -0.049140113 | 0.960807636 | NA          |
| Med15         | 773.9689804 | -0.08771564  | 0.153395993 | -0.571824847 | 0.567440643 | 0.65164891  |
| Deaf1         | 344.8065856 | -0.087767651 | 0.187210823 | -0.468817186 | 0.639200315 | 0.716395172 |
| Atxn7l2       | 69.45207076 | -0.087821075 | 0.288937778 | -0.303944591 | 0.761170105 | 0.818134289 |
| Mgrn1         | 1337.515812 | -0.088043167 | 0.135535158 | -0.64959652  | 0.515952881 | 0.60457521  |
| Gm49378       | 7.791108492 | -0.088363133 | 1.439399679 | -0.061388879 | 0.951049509 | 0.964236368 |
| Sh3yl1        | 194.8677399 | -0.088660861 | 0.290903822 | -0.304777229 | 0.760535826 | 0.817658748 |
| Ppme1         | 519.0278028 | -0.088814481 | 0.309518609 | -0.286943915 | 0.774155264 | 0.829372145 |
| Bicral        | 347.9310281 | -0.089053972 | 0.140543458 | -0.633640109 | 0.526315719 | 0.614479549 |
|               | 7-Mar       |              |             |              |             |             |
| Gm18537       | 635.9135305 | -0.089151772 | 0.194740157 | -0.457798606 | 0.647097137 | 0.723059055 |
| Arl6ip6       | 36.26843636 | -0.089372323 | 0.476565695 | -0.187534109 | 0.851241883 | 0.890004918 |
| Orf3          | 205.4301269 | -0.089466681 | 0.240792514 | -0.371550922 | 0.710227235 | 0.776101141 |
| Hnnpd         | 0.792431744 | -0.089554003 | 2.324788191 | -0.03852136  | 0.969272001 | NA          |
| Nepro         | 1088.477445 | -0.08966197  | 0.183687934 | -0.488121173 | 0.625464014 | 0.704706266 |
| Phf2          | 121.4199958 | -0.089918366 | 0.217808214 | -0.41283276  | 0.679729148 | 0.750908665 |
| Cyp2a22       | 536.9084963 | -0.089983938 | 0.144158184 | -0.624202772 | 0.532494427 | 0.620206667 |
| Cep68         | 50.13240059 | -0.090102339 | 0.410390096 | -0.219552907 | 0.826219371 | 0.870701941 |
| G3bp2         | 247.2543525 | -0.090397581 | 0.149359184 | -0.605236175 | 0.545022082 | 0.631343449 |
| A930002H24Rik | 1193.195957 | -0.090807726 | 0.160753049 | -0.564889604 | 0.572148855 | 0.656260087 |
| Zfp954        | 1.712012192 | -0.090979889 | 1.681431364 | -0.054108595 | 0.956848644 | 0.968494668 |
| 9530053A07Rik | 112.4976136 | -0.091004525 | 0.212393299 | -0.428471735 | 0.668307708 | 0.741124686 |
| Gm43941       | 9.130246354 | -0.091026488 | 0.88631458  | -0.102702235 | 0.9181993   | 0.939470751 |
| Vmn1r198      | 2.929514751 | -0.091033622 | 1.218277173 | -0.074723244 | 0.940434914 | 0.956090736 |
| Mzt1          | 1.239899835 | -0.091200128 | 1.689731631 | -0.053973143 | 0.956956562 | NA          |
| C1ql4         | 331.7749493 | -0.091223242 | 0.23956442  | -0.380787939 | 0.70336061  | 0.770359425 |
| Aip           | 6.926475119 | -0.091632661 | 0.808753879 | -0.113301047 | 0.909791887 | 0.933726572 |
| Zfp771        | 393.539706  | -0.091880611 | 0.15243733  | -0.602743504 | 0.546679336 | 0.63296586  |
| Gm5620        | 289.7209518 | -0.091951908 | 0.229895219 | -0.399973122 | 0.689176314 | 0.759131472 |
| Slco2a1       | 4.978178599 | -0.09198023  | 0.912359332 | -0.100815793 | 0.91969669  | 0.940720536 |
| Tmf1          | 1697.550923 | -0.09206523  | 0.258018685 | -0.356816134 | 0.721229457 | 0.785304962 |
| Nfatc2ip      | 394.663445  | -0.092171306 | 0.16561491  | -0.556539901 | 0.577841826 | 0.661499291 |
| Rreb1         | 90.74284509 | -0.092184447 | 0.263336987 | -0.350062662 | 0.726291672 | 0.789858409 |
| Aucr1         | 648.7368501 | -0.092184465 | 0.198869833 | -0.463541719 | 0.642976118 | 0.719688496 |
| Ncvb1         | 336.7528495 | -0.092234569 | 0.204363085 | -0.451326954 | 0.651753921 | 0.727166286 |
| Prr22         | 2945.056921 | -0.092346281 | 0.189543869 | -0.487202682 | 0.626114705 | 0.705180531 |
| Mtmr14        | 17.10002624 | -0.092396628 | 0.612519473 | -0.150846842 | 0.880096534 | 0.911979438 |
| Ice1          | 462.2290408 | -0.092820241 | 0.152296759 | -0.609469576 | 0.542213233 | 0.629002956 |
| Il17re        | 491.3379351 | -0.092832943 | 0.155691589 | -0.596261772 | 0.551000365 | 0.636671697 |
| Traf6         | 15.30534773 | -0.092878176 | 0.601250121 | -0.154475105 | 0.877235139 | 0.909733235 |
| Rbm18         | 367.9245316 | -0.09303901  | 0.191291587 | -0.48637272  | 0.626702928 | 0.705635792 |
| Scand1        | 329.4176499 | -0.093081913 | 0.188997898 | -0.492502374 | 0.622364244 | 0.701584715 |
| Ubn2          | 553.1251346 | -0.093241433 | 0.154747818 | -0.602537949 | 0.54681611  | 0.633038235 |
| Rusc2         | 730.8744246 | -0.093410586 | 0.186615052 | -0.50055226  | 0.616686268 | 0.696796626 |
| Sema4f        | 612.9818649 | -0.093802697 | 0.279611563 | -0.33547503  | 0.737266777 | 0.79873691  |
| Palmd         | 4.686772672 | -0.094071594 | 1.004388275 | -0.093660585 | 0.925378781 | 0.944888444 |
| Ago1          | 1264.934615 | -0.094135926 | 0.150141142 | -0.626982885 | 0.530670454 | 0.61841773  |
| Fgf1          | 514.95756   | -0.094137803 | 0.153594081 | -0.61289994  | 0.539942503 | 0.626996784 |
| Eif3d         | 346.3567575 | -0.09419809  | 0.407250489 | -0.231302583 | 0.81707974  | 0.863421274 |
| Mfap1a        | 1490.599771 | -0.094458381 | 0.157110658 | -0.601221979 | 0.547692147 | 0.633651423 |
| Tmcc2         | 305.4529364 | -0.094493372 | 0.193815821 | -0.487542096 | 0.625874219 | 0.705075245 |
| Csf3          | 43.72495408 | -0.094626866 | 0.390440788 | -0.24235907  | 0.808501946 | 0.856853238 |
| Arfgef2       | 0.469829603 | -0.094639246 | 3.061850189 | -0.030909169 | 0.975341977 | NA          |
| Cc2d1a        | 926.3914225 | -0.094697568 | 0.221572277 | -0.427389065 | 0.669095971 | 0.741805821 |
| Fastkd3       | 351.977203  | -0.094876857 | 0.182164438 | -0.520830837 | 0.602484619 | 0.684242075 |
| Micu3         | 116.7027487 | -0.095079736 | 0.288469952 | -0.329600138 | 0.741702119 | 0.802318383 |
| Atp6ap1       | 100.4953496 | -0.095420711 | 0.346188398 | -0.275632319 | 0.782830484 | 0.83588213  |
| Gimap9        | 1435.330693 | -0.095516145 | 0.119222536 | -0.80115847  | 0.42303991  | 0.51466384  |
| Orai3         | 232.0838782 | -0.095594595 | 0.284661468 | -0.335818527 | 0.737007718 | 0.798608503 |
|               | 325.899229  | -0.095722924 | 0.212091824 | -0.451327741 | 0.651753354 | 0.727166286 |

|               |             |              |             |              |                |             |
|---------------|-------------|--------------|-------------|--------------|----------------|-------------|
| Olf1293-ps    | 4.443172873 | -0.095800667 | 1.019132193 | -0.094002199 | 0.92510741     | 0.944667932 |
| Gly1r1        | 1550.714696 | -0.09596214  | 0.110455739 | -0.868783644 | 0.384965481    | 0.47716239  |
| Snx27         | 511.5827987 | -0.096066907 | 0.202594132 | -0.474184057 | 0.635368661    | 0.713038308 |
| Zfp169        | 67.73692007 | -0.096180348 | 0.373109669 | -0.257780369 | 0.796576416    | 0.846688368 |
| Ptger3        | 2.274154853 | -0.096433311 | 1.335206402 | -0.072223523 | 0.942424025    | 0.957704148 |
| Klb           | 427.5010258 | -0.096943828 | 0.248514248 | -0.39009364  | 0.696467305    | 0.765184934 |
| Lsg1          | 476.2782577 | -0.097017454 | 0.169755209 | -0.571513857 | 0.56765137     | 0.651846999 |
| Ap4m1         | 388.338558  | -0.097071762 | 0.189849701 | -0.511308481 | 0.609135067    | 0.690231614 |
| Crispld1      | 1.039675748 | -0.097189318 | 2.214081569 | -0.043895997 | 0.964987306 NA |             |
| St6galnac5    | 2.89343733  | -0.097295543 | 1.198339101 | -0.081191995 | 0.935289265    | 0.952186443 |
| Mypop         | 62.60957118 | -0.097577718 | 0.31277786  | -0.311969589 | 0.755063635    | 0.813417052 |
| Sf3a2         | 482.2703136 | -0.097636185 | 0.149409073 | -0.653482302 | 0.513445396    | 0.60237909  |
| Golga1        | 471.8011771 | -0.097710195 | 0.172597512 | -0.566115896 | 0.571314998    | 0.655480052 |
| Gm19426       | 27.61044976 | -0.097713224 | 0.499516066 | -0.195615778 | 0.84491091     | 0.884660435 |
| Dnase2a       | 509.5210741 | -0.097992413 | 0.151644843 | -0.6461968   | 0.518151911    | 0.606776603 |
| Cldn12        | 1214.649199 | -0.09801178  | 0.241752569 | -0.405421876 | 0.685167434    | 0.755692205 |
| Pcnt          | 375.620855  | -0.098113692 | 0.247672918 | -0.39614219  | 0.692000136    | 0.761405597 |
| Ttct17        | 518.1823386 | -0.098208972 | 0.168204409 | -0.583866814 | 0.559309922    | 0.644395185 |
| Atpsckmt      | 298.8171101 | -0.098309207 | 0.151247205 | -0.649990239 | 0.515698527    | 0.604360245 |
| Gm7420        | 0.555210134 | -0.098393137 | 2.928325133 | -0.033600482 | 0.973195738 NA |             |
| Rnf146        | 436.626268  | -0.098463785 | 0.178696514 | -0.551011223 | 0.581625981    | 0.66502748  |
| Sprn          | 17.40391635 | -0.098625597 | 0.586116069 | -0.168269738 | 0.86637108     | 0.901472977 |
| Rpl31-ps8     | 2004.795513 | -0.09864151  | 0.18470055  | -0.53406181  | 0.593298771    | 0.676016404 |
| Tbpl1         | 227.2991718 | -0.098685737 | 0.228148226 | -0.432550972 | 0.665341014    | 0.738555386 |
| Cks1brt       | 0.87790513  | -0.098708993 | 2.24277384  | -0.044012014 | 0.964894828 NA |             |
| Cox14         | 562.9941755 | -0.09871151  | 0.1548712   | -0.637378096 | 0.523878593    | 0.612177733 |
| Itih3         | 21728.90798 | -0.098887955 | 0.290618854 | -0.340266826 | 0.733655597    | 0.795785495 |
| Rdh13         | 195.18011   | -0.09917517  | 0.28824926  | -0.34406045  | 0.730800826    | 0.793643045 |
| Haus1         | 121.5291983 | -0.099560525 | 0.266938797 | -0.372971355 | 0.709169764    | 0.775194033 |
| Fut11         | 146.4920813 | -0.099781663 | 0.200727274 | -0.497100671 | 0.619118061    | 0.698895823 |
| Rpl24         | 4963.391383 | -0.100060337 | 0.107565108 | -0.930230425 | 0.352251792    | 0.444631168 |
| Nova1         | 52.90075552 | -0.10015376  | 0.404297557 | -0.247722893 | 0.804348818    | 0.853353578 |
| Pde4b         | 221.0593287 | -0.100385032 | 0.359671426 | -0.279102049 | 0.780166651    | 0.833664201 |
| Sic38a10      | 1734.33734  | -0.100389457 | 0.196590425 | -0.510652833 | 0.609594174    | 0.690660003 |
| A3galt2       | 1.635027393 | -0.100657262 | 1.513038908 | -0.066526552 | 0.946958619 NA |             |
| Rpl23         | 7520.452309 | -0.100790761 | 0.099642789 | -1.011520883 | 0.311767191    | 0.402652051 |
| Prmt6         | 142.0210064 | -0.100811546 | 0.208829882 | -0.482744828 | 0.62927693     | 0.707972883 |
| Dhps          | 210.5092676 | -0.100867925 | 0.193154938 | -0.522212513 | 0.601522375    | 0.683422422 |
| Phf24         | 9.935787715 | -0.100975244 | 1.04286174  | -0.096825149 | 0.922865251    | 0.94288666  |
| Dnajc17       | 90.70752421 | -0.101317319 | 0.213720594 | -0.474064372 | 0.635454004    | 0.713087142 |
| Mios          | 245.6855364 | -0.101382479 | 0.167398711 | -0.605634767 | 0.54475731     | 0.63112624  |
| Ash1l         | 725.7139824 | -0.101429467 | 0.182806515 | -0.554846019 | 0.578999988    | 0.662558181 |
| Asah2         | 268.3665883 | -0.101458964 | 0.22860564  | -0.443816538 | 0.657175231    | 0.732017206 |
| Mfsd7a        | 101.4639015 | -0.101518211 | 0.310869385 | -0.326562268 | 0.743998986    | 0.804088672 |
| Tfpi          | 104.845684  | -0.101787733 | 0.25493803  | -0.399264612 | 0.689698239    | 0.759510082 |
| Galnt11       | 265.3554954 | -0.10182906  | 0.20467629  | -0.497512732 | 0.618827527    | 0.69861411  |
| Tox4          | 621.2403516 | -0.101829761 | 0.125342414 | -0.81241264  | 0.416554896    | 0.508568174 |
| Eif4h         | 2688.989519 | -0.101966802 | 0.140714308 | -0.724637054 | 0.46867472     | 0.559208191 |
| Zfp74         | 94.61366579 | -0.102200768 | 0.293667604 | -0.348015125 | 0.727828824    | 0.791129592 |
| 9530068E07Rik | 2613.787247 | -0.102285802 | 0.110209973 | -0.928099331 | 0.353356047    | 0.445793968 |
| Zfp51         | 128.5128662 | -0.102286355 | 0.204339754 | -0.500570019 | 0.616673767    | 0.696796626 |
| Twf1          | 1116.298555 | -0.102296425 | 0.121091507 | -0.84478613  | 0.39823026     | 0.490962502 |
| Gabrg1        | 1.271403619 | -0.1023916   | 1.823136093 | -0.056162346 | 0.955212477 NA |             |
| Kdm4c         | 164.5947398 | -0.10253874  | 0.189699597 | -0.540532199 | 0.588830062    | 0.671867673 |
| Dhx38         | 448.418516  | -0.102683371 | 0.150847356 | -0.680710446 | 0.496054725    | 0.585863666 |
| Nup37         | 93.20091795 | -0.102826823 | 0.270555396 | -0.380058295 | 0.703902143    | 0.770707801 |
| Capn15        | 521.1109372 | -0.102833972 | 0.266483683 | -0.385892192 | 0.699576514    | 0.767809206 |
| Nup155        | 625.8843513 | -0.102870777 | 0.23681211  | -0.434398298 | 0.663999234    | 0.737546191 |
| Gm10131       | 229.6280001 | -0.103034115 | 0.312854557 | -0.32933551  | 0.741902107    | 0.802483796 |
| Olf1402       | 3.009527191 | -0.103067973 | 1.072780709 | -0.096075528 | 0.923460587    | 0.943268789 |
| Ccdc77        | 130.520768  | -0.103170188 | 0.27494502  | -0.37523934  | 0.707482475    | 0.773746551 |
| Rbm26         | 630.572406  | -0.103430679 | 0.19144568  | -0.54026123  | 0.589016891    | 0.67203587  |
| Intu          | 88.21889174 | -0.103554797 | 0.268081869 | -0.386280496 | 0.699288944    | 0.767543002 |
| Gm44821       | 9.757091924 | -0.10361107  | 0.637961859 | -0.162409505 | 0.870983386    | 0.904570501 |
| Csnk2a2       | 626.9160814 | -0.103865979 | 0.200906013 | -0.516987905 | 0.605164602    | 0.686776029 |
| Skint8        | 9.838803481 | -0.10390564  | 0.627823547 | -0.165501342 | 0.868549393    | 0.903032875 |

|               |             |              |             |              |                |             |
|---------------|-------------|--------------|-------------|--------------|----------------|-------------|
| Pdpk1         | 520.6946436 | -0.104117916 | 0.179356667 | -0.580507642 | 0.561572335    | 0.646346554 |
| Ano9          | 4.474950526 | -0.104240392 | 0.988229561 | -0.105481961 | 0.915993383    | 0.937889201 |
| Nap1l4        | 808.770283  | -0.104252449 | 0.14687976  | -0.709780904 | 0.477840013    | 0.568170784 |
| Cdk2          | 354.3254971 | -0.104267839 | 0.173313665 | -0.601613491 | 0.547431446    | 0.633516877 |
| Tmem101       | 102.0767515 | -0.104423111 | 0.232819041 | -0.448516198 | 0.653780699    | 0.728759864 |
| Cops7a        | 1104.060301 | -0.104590979 | 0.152861894 | -0.684218783 | 0.493837023    | 0.58369887  |
| Hmbox1        | 441.496388  | -0.104619379 | 0.204789632 | -0.510862676 | 0.609447218    | 0.690539424 |
| Vmn1r73       | 2.141185349 | -0.10482795  | 1.253248863 | -0.083644959 | 0.93333872     | 0.950590253 |
| Cfl1          | 6216.342963 | -0.105163849 | 0.186508186 | -0.56385648  | 0.57285181     | 0.656801241 |
| Zfp783        | 25.96059486 | -0.10517805  | 0.440705007 | -0.238658623 | 0.811370304    | 0.859038687 |
| Pbdc1         | 205.7712192 | -0.105277165 | 0.187221863 | -0.562312344 | 0.57390323     | 0.657697113 |
| Fbxw4         | 261.8872589 | -0.105414577 | 0.177159335 | -0.595026941 | 0.551825462    | 0.637279534 |
| Ppp1r7        | 470.5574809 | -0.105436807 | 0.275129987 | -0.383225427 | 0.701552627    | 0.769136282 |
| Zfp628        | 167.1968774 | -0.105623816 | 0.231879628 | -0.455511409 | 0.648741362    | 0.724468933 |
| Kdm3b         | 810.5510727 | -0.105691586 | 0.185648776 | -0.56930936  | 0.569146216    | 0.653343525 |
| Pde1c         | 4.057823002 | -0.106101022 | 0.909196529 | -0.116697566 | 0.907099719    | 0.931580483 |
| Ahi1          | 22.01727869 | -0.106303722 | 0.416967218 | -0.254945035 | 0.798765552    | 0.848750632 |
| Lcmt1         | 215.6686893 | -0.106371238 | 0.183027876 | -0.581175065 | 0.561122472    | 0.646134137 |
| Slc39a3       | 208.239692  | -0.106774352 | 0.203487847 | -0.524721027 | 0.599777137    | 0.68188661  |
| Adgrf5        | 383.3702069 | -0.106832789 | 0.306073641 | -0.349042762 | 0.727057207    | 0.790477334 |
| Cep131        | 148.2093669 | -0.106898241 | 0.280098862 | -0.381644682 | 0.702724937    | 0.7699961   |
| Micu2         | 983.0398519 | -0.106960235 | 0.196714074 | -0.543734533 | 0.586624165    | 0.669709286 |
| Dpp3          | 1054.193126 | -0.107087843 | 0.203425253 | -0.526423543 | 0.598593961    | 0.680938234 |
| Olfr958       | 5.389524438 | -0.107173828 | 0.873924492 | -0.122635112 | 0.902396049    | 0.928371724 |
| Slc40a1       | 2038.466388 | -0.107317988 | 0.220611437 | -0.486457044 | 0.626643154    | 0.705615092 |
| Etv3          | 327.6085205 | -0.107435482 | 0.190238476 | -0.564741077 | 0.57224989     | 0.656331817 |
| Atg4b         | 563.2600909 | -0.10745503  | 0.194266989 | -0.553130672 | 0.580173935    | 0.663723342 |
| Ccdc9         | 578.8909156 | -0.107467792 | 0.147067777 | -0.730736495 | 0.464940119    | 0.555568736 |
| Eef1akmt4     | 115.9058764 | -0.107857525 | 0.270890038 | -0.398159804 | 0.690512393    | 0.760185811 |
| Thumpd3       | 400.2176403 | -0.107883597 | 0.182214645 | -0.592068748 | 0.553804553    | 0.639002371 |
| Shpina10      | 4165.760356 | -0.107885557 | 0.18730063  | -0.576002101 | 0.564613761    | 0.649058355 |
| Qtrt1         | 107.8223409 | -0.108029635 | 0.285312355 | -0.378636374 | 0.704957907    | 0.771480447 |
| Surf4         | 4932.305841 | -0.108291297 | 0.21585315  | -0.501689677 | 0.615885827    | 0.69621521  |
| St6galnac6    | 835.7409239 | -0.108404432 | 0.23122234  | -0.468831998 | 0.639189726    | 0.716395172 |
| Pdia4         | 4176.552831 | -0.108411866 | 0.180222075 | -0.601545986 | 0.547476393    | 0.633516877 |
| Zfp955a       | 47.35208922 | -0.108437471 | 0.31614533  | -0.342998807 | 0.731599357    | 0.794262615 |
| Raver1        | 681.8978568 | -0.108552716 | 0.129823488 | -0.836156216 | 0.403067027    | 0.496064588 |
| Olfr462       | 0.869077198 | -0.108773316 | 2.010908892 | -0.054091618 | 0.95686217 NA  |             |
| Crk           | 1177.225866 | -0.108796793 | 0.179836192 | -0.604977183 | 0.545194157    | 0.631460697 |
| Zfhx3         | 292.955469  | -0.108838271 | 0.1712509   | -0.63554861  | 0.525070674    | 0.61319392  |
| Pank2         | 535.9120405 | -0.108858376 | 0.191682737 | -0.567909127 | 0.570096674    | 0.654346469 |
| Gm19129       | 0.4884998   | -0.108951764 | 3.626695092 | -0.030041611 | 0.976033867 NA |             |
| Gm13508       | 0.488567318 | -0.109519536 | 3.626682912 | -0.030198266 | 0.975908931 NA |             |
| Ppig          | 692.7647271 | -0.109542982 | 0.22742897  | -0.481657996 | 0.63004892     | 0.708607599 |
| Pigw          | 93.58092154 | -0.109622712 | 0.33412984  | -0.328084173 | 0.74284802     | 0.803150244 |
| 1700010114Rik | 15.70307043 | -0.109793732 | 0.483451476 | -0.227103933 | 0.820342926    | 0.865772702 |
| Phf3          | 1346.108408 | -0.109803892 | 0.219515087 | -0.500211142 | 0.616926414    | 0.69697558  |
| Dapl1         | 0.486041719 | -0.109876641 | 3.0330862   | -0.03622602  | 0.971102139 NA |             |
| Mapk9         | 1010.361107 | -0.109969938 | 0.12350417  | -0.890414779 | 0.37324321     | 0.465475511 |
| Rbm41         | 58.57363847 | -0.110025144 | 0.348446012 | -0.315759515 | 0.75218505     | 0.810828373 |
| Yy2           | 18.80514467 | -0.110078265 | 0.620562111 | -0.177384766 | 0.859206172    | 0.895722037 |
| Fam167b       | 70.13378365 | -0.110106288 | 0.33603669  | -0.327661505 | 0.743167612    | 0.803393878 |
| Pter          | 1545.404742 | -0.110451622 | 0.158850861 | -0.695316484 | 0.486856986    | 0.576799227 |
| Gemin6        | 99.07320804 | -0.110459528 | 0.253960615 | -0.434947473 | 0.663600555    | 0.73720521  |
| Prex2         | 141.5078025 | -0.110882345 | 0.276800477 | -0.400585817 | 0.68872509     | 0.758830565 |
| Atm           | 126.230944  | -0.111028683 | 0.516497571 | -0.214964578 | 0.829794935    | 0.873446781 |
| Suz12         | 537.6080161 | -0.111318248 | 0.147859264 | -0.752866243 | 0.451530295    | 0.542510993 |
| H2-T3         | 0.889155706 | -0.111862117 | 2.404908415 | -0.046514086 | 0.962900507 NA |             |
| Blzf1         | 214.1499027 | -0.112036547 | 0.208327127 | -0.537791447 | 0.590721038    | 0.673574493 |
| Prdm5         | 14.01057089 | -0.112228217 | 0.516351118 | -0.217348648 | 0.827936648    | 0.872083038 |
| Tead3         | 372.0350193 | -0.112497353 | 0.304379871 | -0.369595246 | 0.711684094    | 0.777194954 |
| Acer2         | 230.4944739 | -0.113005074 | 0.370681556 | -0.304857559 | 0.760474641    | 0.817658748 |
| Csnk1g3       | 558.3229718 | -0.113124941 | 0.143002739 | -0.791068349 | 0.428904108    | 0.520757583 |
| Dph6          | 135.4604796 | -0.113141922 | 0.203390007 | -0.556280633 | 0.578019025    | 0.661657714 |
| Ttc8          | 132.9445151 | -0.113228327 | 0.364821588 | -0.310366303 | 0.756282416    | 0.814309177 |
| Tmem184c      | 401.3410247 | -0.113905912 | 0.24720178  | -0.460781118 | 0.64495565     | 0.72132808  |



|               |             |              |             |              |             |    |             |
|---------------|-------------|--------------|-------------|--------------|-------------|----|-------------|
| Vmn1r84       | 1.055117635 | -0.114330155 | 2.292988663 | -0.049860759 | 0.960233348 | NA |             |
| Ctdp1         | 255.0385507 | -0.114438841 | 0.191604353 | -0.597264142 | 0.550331041 |    | 0.636070751 |
| Utp18         | 263.6373229 | -0.114642755 | 0.228945064 | -0.500743509 | 0.616551647 |    | 0.696783062 |
| Gm91669       | 0.899482515 | -0.114793818 | 2.240474478 | -0.051236387 | 0.959137157 | NA |             |
| Klrb1a        | 3.521203087 | -0.114804447 | 1.150926802 | -0.099749584 | 0.920543134 |    | 0.941191037 |
| Syngn3        | 1.943661179 | -0.114809301 | 1.51089263  | -0.07598773  | 0.93942886  |    | 0.955394032 |
| Ppp3cb        | 535.2854344 | -0.114962648 | 0.175053151 | -0.656729953 | 0.511354571 |    | 0.600590612 |
| Gm14325       | 93.78876267 | -0.115011775 | 0.301041238 | -0.382046579 | 0.702426816 |    | 0.769775869 |
| Rubcn         | 453.6872874 | -0.115066524 | 0.16329995  | -0.704632937 | 0.481038696 |    | 0.571321422 |
| Aifm2         | 582.67229   | -0.115177731 | 0.258256186 | -0.445982468 | 0.65560991  |    | 0.730603234 |
| Map2k1        | 944.3836942 | -0.115179326 | 0.112239886 | -1.026188908 | 0.304802549 |    | 0.394943669 |
| Eif3c         | 2549.811459 | -0.11538359  | 0.18848386  | -0.612166955 | 0.540427303 |    | 0.627431535 |
| Dusp12        | 446.6862258 | -0.115444468 | 0.227997159 | -0.506341693 | 0.612616799 |    | 0.693301327 |
| Usp9x         | 2257.260507 | -0.115489743 | 0.186454024 | -0.619400647 | 0.535652455 |    | 0.622821106 |
| Ccdc93        | 309.6840524 | -0.115502151 | 0.19588476  | -0.589643377 | 0.555429764 |    | 0.640468566 |
| Fbxl6         | 485.6822686 | -0.115578485 | 0.142606065 | -0.810473839 | 0.417667895 |    | 0.509327773 |
| Gm16286       | 1035.482891 | -0.115781314 | 0.139714403 | -0.828699916 | 0.407274233 |    | 0.499727302 |
| Ppp5          | 527.1467081 | -0.115967707 | 0.225730948 | -0.513743055 | 0.607431646 |    | 0.688621805 |
| Cyp2ab1       | 1.324235567 | -0.116181367 | 1.552236329 | -0.074847731 | 0.940335864 | NA |             |
| Rfc2          | 390.2205008 | -0.116249239 | 0.211736166 | -0.549028736 | 0.58298573  |    | 0.666180087 |
| Dennd2d       | 212.061054  | -0.116447002 | 0.20648174  | -0.563957866 | 0.572782807 |    | 0.656766297 |
| Cpne9         | 5.836454716 | -0.11678127  | 0.989274568 | -0.118047379 | 0.906030117 |    | 0.930818455 |
| Pus7          | 234.8085373 | -0.116858731 | 0.256953084 | -0.454786258 | 0.649263018 |    | 0.724861554 |
| Banf1         | 826.9167392 | -0.117011551 | 0.158120174 | -0.740016586 | 0.45928993  |    | 0.549814808 |
| Rab32         | 690.8954063 | -0.117202568 | 0.150768917 | -0.777365588 | 0.436943109 |    | 0.528298306 |
| Ctnnb1        | 330.0847718 | -0.11727043  | 0.169148067 | -0.693300446 | 0.488121023 |    | 0.578121194 |
| Tmem52b       | 1.717508306 | -0.117322233 | 1.973748614 | -0.059441325 | 0.952600599 |    | 0.965344315 |
| Bckdk         | 312.1589565 | -0.11748196  | 0.24554436  | -0.478455136 | 0.632326299 |    | 0.710595461 |
| Aipl1         | 3.415127858 | -0.117525925 | 1.076770326 | -0.109146697 | 0.913086137 |    | 0.935950221 |
| Gm29668       | 5.832676702 | -0.117536403 | 0.789027909 | -0.148963556 | 0.88158239  |    | 0.912936661 |
| Zfp800        | 151.2075265 | -0.117559837 | 0.198956468 | -0.590882205 | 0.55459935  |    | 0.639789533 |
| Gm18997       | 0.486469981 | -0.117922728 | 3.032910932 | -0.038881039 | 0.968985234 | NA |             |
| Cd4           | 53.24746837 | -0.118152955 | 0.571279998 | -0.206821446 | 0.836149307 |    | 0.878021151 |
| Tfe3          | 584.3669903 | -0.118155754 | 0.178712029 | -0.661151658 | 0.508515059 |    | 0.597997153 |
| Il4i1         | 19.4452309  | -0.11817932  | 0.717414059 | -0.164729584 | 0.86915683  |    | 0.903278813 |
| Spopl         | 200.9305441 | -0.118186693 | 0.267199825 | -0.44231576  | 0.658260728 |    | 0.733034744 |
| Trim30b       | 18.55183411 | -0.118279336 | 0.579291646 | -0.204179254 | 0.838213423 |    | 0.879430269 |
| Gm13276       | 0.091039425 | -0.118285806 | 3.641303803 | -0.032484465 | 0.974085705 | NA |             |
| Casc3         | 565.4950222 | -0.118304162 | 0.139829819 | -0.846058182 | 0.397520288 |    | 0.490335422 |
| Ube2v1        | 1383.073038 | -0.118556896 | 0.189106814 | -0.626930852 | 0.530704563 |    | 0.61841773  |
| Naa20         | 377.6975599 | -0.118598516 | 0.157595969 | -0.752547905 | 0.451721633 |    | 0.542626155 |
| 4931406B18Rik | 4.932656796 | -0.118987176 | 0.893176216 | -0.13321803  | 0.894020952 |    | 0.922315836 |
| Tbc1d22b      | 150.5917889 | -0.11913859  | 0.206506833 | -0.576923238 | 0.563991312 |    | 0.648517732 |
| Usp21         | 438.8100492 | -0.119276514 | 0.182025619 | -0.655273226 | 0.512291855 |    | 0.601442845 |
| Pard3b        | 136.0949238 | -0.119483295 | 0.274704769 | -0.434951659 | 0.663597516 |    | 0.73720521  |
| Sort1         | 662.9816546 | -0.119621668 | 0.225458545 | -0.530570566 | 0.595716397 |    | 0.678363044 |
| Pin1          | 299.7017385 | -0.119647525 | 0.20573652  | -0.581557053 | 0.560865078 |    | 0.645925005 |
| Dlg3          | 491.4132313 | -0.11966805  | 0.182592206 | -0.655384219 | 0.512220409 |    | 0.601400382 |
| Mapkbp1       | 222.3828243 | -0.119790889 | 0.176844745 | -0.677378842 | 0.498165619 |    | 0.587732005 |
| Srprb         | 486.7792824 | -0.120095071 | 0.193742688 | -0.619868922 | 0.535344088 |    | 0.622505014 |
| Ddx54         | 800.1160139 | -0.120862064 | 0.198928146 | -0.60756643  | 0.543475072 |    | 0.629940374 |
| Plcb1         | 265.3013742 | -0.120968782 | 0.269261567 | -0.449261229 | 0.653243223 |    | 0.72835124  |
| Tada1         | 269.125564  | -0.12106693  | 0.192921365 | -0.627545475 | 0.530301737 |    | 0.618075067 |
| lqcg          | 36.10020623 | -0.121186237 | 0.375050147 | -0.323120089 | 0.746604297 |    | 0.806137821 |
| H3f3a         | 3516.793558 | -0.122264905 | 0.092559537 | -1.320932545 | 0.186523857 |    | 0.261651229 |
| Cdk12         | 431.7596571 | -0.122508985 | 0.191428987 | -0.639970919 | 0.522191506 |    | 0.610668184 |
| Zfp267        | 112.0146232 | -0.122628096 | 0.19431469  | -0.631079906 | 0.527988279 |    | 0.616136914 |
| Eif4e1b       | 3.487718696 | -0.122759841 | 1.186091858 | -0.103499438 | 0.917566596 |    | 0.939093964 |
| Gm18733       | 2.358093072 | -0.12300537  | 1.161018662 | -0.105946074 | 0.915625138 |    | 0.937568463 |
| Mindy2        | 396.9402042 | -0.123018986 | 0.164276485 | -0.748853289 | 0.453945637 |    | 0.544772149 |
| Pan3          | 683.7675887 | -0.123195802 | 0.208057895 | -0.592122694 | 0.553768431 |    | 0.639002371 |
| Srp54b        | 221.1547476 | -0.123339792 | 0.292982445 | -0.420980146 | 0.67376958  |    | 0.745581189 |
| Nfkbil1       | 197.7166187 | -0.123561723 | 0.194480737 | -0.635341706 | 0.525205579 |    | 0.613309453 |
| Gla           | 112.7332576 | -0.12368089  | 0.215011306 | -0.575229704 | 0.565135956 |    | 0.649356683 |
| Gm18492       | 1.792496526 | -0.123753628 | 1.598209623 | -0.077432663 | 0.938279357 |    | 0.954516439 |
| Spg21         | 545.3613566 | -0.123945012 | 0.145956399 | -0.849192043 | 0.39577444  |    | 0.488500048 |

|               |             |              |             |              |             |             |
|---------------|-------------|--------------|-------------|--------------|-------------|-------------|
| E130309D02Rik | 243.6957666 | -0.123963229 | 0.192088972 | -0.645342766 | 0.518705085 | 0.607299243 |
| Hltf          | 312.8525897 | -0.124287382 | 0.239167421 | -0.519666855 | 0.603295793 | 0.684980797 |
| Hp            | 76149.75517 | -0.1246098   | 0.242321695 | -0.514232951 | 0.607089133 | 0.688370837 |
| Pik3c2b       | 188.2928563 | -0.124932567 | 0.167710831 | -0.744928436 | 0.456314984 | 0.54710302  |
| 2210016L21Rik | 299.105662  | -0.12508153  | 0.230288282 | -0.543151952 | 0.587025185 | 0.670032496 |
| OR5BS1P       | 0.907070461 | -0.125086934 | 1.837727253 | -0.068066104 | 0.945733013 | NA          |
| Sash1         | 697.3810827 | -0.125163938 | 0.157827835 | -0.793040961 | 0.427753958 | 0.519731272 |
| Olfr1250      | 3.412875098 | -0.125193233 | 1.21025289  | -0.103443862 | 0.917610702 | 0.939093964 |
| 6030458C11Rik | 411.5620227 | -0.125196663 | 0.154466218 | -0.810511608 | 0.417646197 | 0.509327773 |
| Gm9812        | 1.761848545 | -0.125382156 | 1.414271    | -0.088654972 | 0.929356119 | 0.9478331   |
| Baz1b         | 1183.449162 | -0.125409503 | 0.180928625 | -0.693143515 | 0.488219492 | 0.578198395 |
| Man2a1        | 3437.070976 | -0.125499372 | 0.269283345 | -0.466049514 | 0.641180006 | 0.718283458 |
| Wdr60         | 124.3151513 | -0.125605949 | 0.313470834 | -0.400694214 | 0.688645271 | 0.758791661 |
| Golga3        | 522.2289921 | -0.125611434 | 0.161477311 | -0.777889064 | 0.436634416 | 0.527999966 |
| Hpf1          | 185.8397239 | -0.125673595 | 0.275882001 | -0.455533866 | 0.648725209 | 0.724468933 |
| Ugcg          | 463.5284002 | -0.127144897 | 0.156613524 | -0.811838553 | 0.416884277 | 0.508699675 |
| Wac           | 1141.672882 | -0.12783312  | 0.129668748 | -0.985843719 | 0.324209808 | 0.415542351 |
| Snx18         | 443.3514657 | -0.127833425 | 0.184723278 | -0.692026619 | 0.488920613 | 0.578747299 |
| Olfr395       | 3.67360983  | -0.128262754 | 1.192930015 | -0.107519094 | 0.914377178 | 0.936797003 |
| Arid4a        | 400.1563058 | -0.12854913  | 0.157450362 | -0.816442264 | 0.414247232 | 0.506496939 |
| Cryba1        | 1.127641699 | -0.128579371 | 2.136508469 | -0.060182009 | 0.952010675 | NA          |
| Snu13         | 770.065671  | -0.128650074 | 0.187852209 | -0.68484728  | 0.493440297 | 0.583327799 |
| Eif3s6-ps2    | 0.500897279 | -0.128895012 | 3.089711966 | -0.041717485 | 0.966723915 | NA          |
| Tm6sf2        | 426.2413374 | -0.129190338 | 0.274600472 | -0.470466554 | 0.638021724 | 0.715309375 |
| Arf4          | 2737.300506 | -0.129310873 | 0.159356578 | -0.811456134 | 0.417103774 | 0.508858247 |
| Prf1          | 6.166431708 | -0.129549793 | 0.97196231  | -0.133286849 | 0.893966528 | 0.922315503 |
| Fam76a        | 276.157796  | -0.129707137 | 0.215476307 | -0.601955449 | 0.547203793 | 0.633358019 |
| Kdm3a         | 582.8030631 | -0.129713398 | 0.163248885 | -0.794574478 | 0.42686107  | 0.518868272 |
| Rrp8          | 197.7550347 | -0.129951789 | 0.263427011 | -0.493312316 | 0.621791927 | 0.7009859   |
| Srsf10        | 887.1002467 | -0.130081013 | 0.1573483   | -0.826707452 | 0.408402897 | 0.500823808 |
| Ddx23         | 944.7269825 | -0.130144522 | 0.143366938 | -0.907772209 | 0.363998584 | 0.456257344 |
| Vstm5         | 5.23411904  | -0.130340198 | 0.772818659 | -0.168655604 | 0.866067541 | 0.901221964 |
| Aimp2         | 217.4840975 | -0.130737924 | 0.219706772 | -0.595056414 | 0.551805762 | 0.637279534 |
| Fv1           | 29.92174179 | -0.131105351 | 0.413383284 | -0.317152038 | 0.751128241 | 0.809894014 |
| Rps27         | 3223.943328 | -0.131294084 | 0.138426977 | -0.948471799 | 0.342889323 | 0.435295047 |
| Gm8108        | 0.091203566 | -0.131523916 | 3.641281407 | -0.036120228 | 0.971186493 | NA          |
| Bcl2l13       | 645.5964886 | -0.131625754 | 0.211801733 | -0.621457396 | 0.534298718 | 0.621562447 |
| Zdhhc16       | 352.6258652 | -0.131822378 | 0.163938874 | -0.804094693 | 0.421342289 | 0.513147831 |
| Crb1          | 6.825908909 | -0.132025827 | 0.676714944 | -0.195098141 | 0.845316118 | 0.884976    |
| Tmem94        | 676.721708  | -0.132049191 | 0.12072333  | -1.093816668 | 0.274035392 | 0.360836902 |
| Sesn2         | 168.9249417 | -0.132093446 | 0.209508354 | -0.630492498 | 0.528372409 | 0.61641015  |
| Apba2         | 4.121925195 | -0.13210671  | 1.343559745 | -0.098325891 | 0.921673519 | 0.942022671 |
| Mertk         | 367.5935046 | -0.132266276 | 0.257766176 | -0.513125025 | 0.607863867 | 0.689065976 |
| Kcnd1         | 17.92974592 | -0.132293345 | 0.574089139 | -0.230440425 | 0.817749552 | 0.863895571 |
| Shank1        | 8.065718879 | -0.132346702 | 0.711850873 | -0.18591914  | 0.852508172 | 0.890864247 |
| Tssc4         | 326.2952251 | -0.132415975 | 0.210348208 | -0.629508454 | 0.529016236 | 0.616956409 |
| Gpm6a         | 23.18771288 | -0.13243889  | 0.634560502 | -0.208709634 | 0.834674919 | 0.876959079 |
| Gpc4          | 991.5149009 | -0.132635594 | 0.202892501 | -0.653723491 | 0.513289966 | 0.602324285 |
| Olfr1217      | 1.085732026 | -0.132801921 | 2.064133647 | -0.06433785  | 0.948701216 | NA          |
| Camk2g        | 297.1435323 | -0.132884274 | 0.184479625 | -0.720319516 | 0.471328292 | 0.561941724 |
| Ric8a         | 611.3660485 | -0.132934035 | 0.213578533 | -0.622412903 | 0.533670398 | 0.621194384 |
| Pde6d         | 156.4606344 | -0.132987534 | 0.197414581 | -0.673645955 | 0.500536429 | 0.590039071 |
| Znhit6        | 177.3400584 | -0.133238025 | 0.333262874 | -0.399798584 | 0.689304874 | 0.759150669 |
| Gm12918       | 1330.958988 | -0.13335985  | 0.229853898 | -0.580193989 | 0.561783807 | 0.646523086 |
| Enpp1         | 354.1061073 | -0.133364774 | 0.187304897 | -0.712019686 | 0.476452586 | 0.567020152 |
| Vps36         | 531.6384033 | -0.133576219 | 0.160989415 | -0.829720506 | 0.406696825 | 0.49916559  |
| St3gal1       | 1777.509915 | -0.133732092 | 0.200321024 | -0.6675889   | 0.504396045 | 0.593767696 |
| Chrna3        | 0.091420485 | -0.134004403 | 3.64130505  | -0.036801202 | 0.970643516 | NA          |
| Olfr1535      | 0.091420485 | -0.134004403 | 3.64130505  | -0.036801202 | 0.970643516 | NA          |
| Olfr48        | 0.091420485 | -0.134004403 | 3.64130505  | -0.036801202 | 0.970643516 | NA          |
| Olfr683       | 0.091420485 | -0.134004403 | 3.64130505  | -0.036801202 | 0.970643516 | NA          |
| 4933421107Rik | 0.091420485 | -0.134004403 | 3.64130505  | -0.036801202 | 0.970643516 | NA          |
| AC242685.1    | 0.091420485 | -0.134004403 | 3.64130505  | -0.036801202 | 0.970643516 | NA          |
| Adam3         | 0.091420485 | -0.134004403 | 3.64130505  | -0.036801202 | 0.970643516 | NA          |
| AL669898.2    | 0.091420485 | -0.134004403 | 3.64130505  | -0.036801202 | 0.970643516 | NA          |
| Avpr1b        | 0.091420485 | -0.134004403 | 3.64130505  | -0.036801202 | 0.970643516 | NA          |







|               |             |              |             |              |             |    |             |
|---------------|-------------|--------------|-------------|--------------|-------------|----|-------------|
| Rpl31-ps3     | 0.091420485 | -0.134004403 | 3.64130505  | -0.036801202 | 0.970643516 | NA |             |
| Rps15a-ps5    | 0.091420485 | -0.134004403 | 3.64130505  | -0.036801202 | 0.970643516 | NA |             |
| Serpinb9g     | 0.091420485 | -0.134004403 | 3.64130505  | -0.036801202 | 0.970643516 | NA |             |
| Smarce1-ps1   | 0.091420485 | -0.134004403 | 3.64130505  | -0.036801202 | 0.970643516 | NA |             |
| Smtnl1        | 0.091420485 | -0.134004403 | 3.64130505  | -0.036801202 | 0.970643516 | NA |             |
| Sphkap        | 0.091420485 | -0.134004403 | 3.64130505  | -0.036801202 | 0.970643516 | NA |             |
| Stmn4         | 0.091420485 | -0.134004403 | 3.64130505  | -0.036801202 | 0.970643516 | NA |             |
| Stpg4         | 0.091420485 | -0.134004403 | 3.64130505  | -0.036801202 | 0.970643516 | NA |             |
| Tmem211       | 0.091420485 | -0.134004403 | 3.64130505  | -0.036801202 | 0.970643516 | NA |             |
| Tpsg1         | 0.091420485 | -0.134004403 | 3.64130505  | -0.036801202 | 0.970643516 | NA |             |
| Trav13n-1     | 0.091420485 | -0.134004403 | 3.64130505  | -0.036801202 | 0.970643516 | NA |             |
| Trav16n       | 0.091420485 | -0.134004403 | 3.64130505  | -0.036801202 | 0.970643516 | NA |             |
| Trbv15        | 0.091420485 | -0.134004403 | 3.64130505  | -0.036801202 | 0.970643516 | NA |             |
| Trbv29        | 0.091420485 | -0.134004403 | 3.64130505  | -0.036801202 | 0.970643516 | NA |             |
| Trdj1         | 0.091420485 | -0.134004403 | 3.64130505  | -0.036801202 | 0.970643516 | NA |             |
| Tssk2         | 0.091420485 | -0.134004403 | 3.64130505  | -0.036801202 | 0.970643516 | NA |             |
| Usp17ld       | 0.091420485 | -0.134004403 | 3.64130505  | -0.036801202 | 0.970643516 | NA |             |
| Vmn1r172      | 0.091420485 | -0.134004403 | 3.64130505  | -0.036801202 | 0.970643516 | NA |             |
| Dner          | 0.091420485 | -0.134004403 | 3.64130505  | -0.036801202 | 0.970643516 | NA |             |
| Igsf11        | 602.5799094 | -0.134065281 | 0.284119598 | -0.471862137 | 0.637025196 |    | 0.714249414 |
| Anapc11       | 383.7786059 | -0.1341908   | 0.224824925 | -0.596867984 | 0.550595524 |    | 0.636333299 |
| Eif3a         | 3034.266026 | -0.1342827   | 0.169933542 | -0.790207154 | 0.429406799 |    | 0.521089768 |
| Stxbp2        | 1128.648584 | -0.134486783 | 0.221136693 | -0.608161321 | 0.543080485 |    | 0.629611432 |
| Cops8         | 498.6259967 | -0.134612712 | 0.192055973 | -0.700903545 | 0.483363212 |    | 0.573750947 |
| Patl2         | 2.819422515 | -0.134991012 | 1.265424455 | -0.106676468 | 0.915045652 |    | 0.937256565 |
| Mfsd4b5       | 11.21449151 | -0.135024902 | 0.626902023 | -0.215384377 | 0.829467649 |    | 0.873371903 |
| Clasp2        | 213.6732737 | -0.135059311 | 0.16857065  | -0.801203004 | 0.423014132 |    | 0.51466384  |
| Pura          | 201.3265555 | -0.13601319  | 0.203067548 | -0.669792843 | 0.502989857 |    | 0.592439621 |
| Eps8l2        | 3280.534926 | -0.136024797 | 0.170907367 | -0.795897802 | 0.426091439 |    | 0.518080512 |
| Ints7         | 563.6043543 | -0.13629658  | 0.173018085 | -0.787759148 | 0.430837601 |    | 0.522323952 |
| Gm2574        | 1.337633173 | -0.136360274 | 1.788484311 | -0.076243483 | 0.939225389 | NA |             |
| Gm5138        | 1.337633173 | -0.136360274 | 1.788484311 | -0.076243483 | 0.939225389 | NA |             |
| Irf2bpl       | 714.7810659 | -0.136534482 | 0.174139608 | -0.784051853 | 0.433009685 |    | 0.524360181 |
| Sic16a13      | 38.67280261 | -0.136616648 | 0.46219577  | -0.295581779 | 0.767549491 |    | 0.823433624 |
| Adar          | 602.0185648 | -0.136629982 | 0.209902564 | -0.650920975 | 0.515097501 |    | 0.603738893 |
| Pdp2r5c       | 955.4757754 | -0.136853491 | 0.156026134 | -0.87711903  | 0.380421989 |    | 0.4723894   |
| Pick1         | 606.2661721 | -0.136858536 | 0.196143495 | -0.697747001 | 0.485335429 |    | 0.575702643 |
| 1700019A02Rik | 0.842398246 | -0.136892973 | 2.012065505 | -0.068036042 | 0.945756943 | NA |             |
| Traf7         | 642.7441263 | -0.13710299  | 0.211776859 | -0.647393633 | 0.517377215 |    | 0.60595265  |
| Syne3         | 58.03377186 | -0.1373597   | 0.327039174 | -0.420009929 | 0.6744782   |    | 0.7461716   |
| Tbc1d2b       | 686.9409933 | -0.137576506 | 0.215484761 | -0.638451209 | 0.523180005 |    | 0.611446681 |
| Eef2kmt       | 190.0048281 | -0.137685735 | 0.225740214 | -0.609930026 | 0.541908161 |    | 0.628765421 |
| Otub1         | 889.634133  | -0.137897961 | 0.154784281 | -0.890904165 | 0.372980585 |    | 0.465250093 |
| Rbak          | 152.8397069 | -0.13795621  | 0.312750492 | -0.441106294 | 0.659136047 |    | 0.73376984  |
| Mkrm3         | 10.10320331 | -0.138298064 | 0.741130853 | -0.186604111 | 0.851971044 |    | 0.8904667   |
| Xlr4b         | 17.0367476  | -0.138998249 | 0.871303915 | -0.159529008 | 0.873252106 |    | 0.906153868 |
| Cntn1         | 6.333605368 | -0.139092267 | 0.811816112 | -0.171334696 | 0.8639606   |    | 0.899334468 |
| Gm5743        | 0.520762914 | -0.139093187 | 3.609017819 | -0.038540455 | 0.969256777 | NA |             |
| Ercc3         | 472.4398685 | -0.139330885 | 0.12880864  | -1.081688962 | 0.279390759 |    | 0.366925018 |
| Zfp60         | 178.0423122 | -0.139429699 | 0.180877309 | -0.770852354 | 0.440794451 |    | 0.531973935 |
| Nhlrc3        | 302.7854562 | -0.139468212 | 0.221764101 | -0.628903465 | 0.529412257 |    | 0.617333801 |
| Tusc1         | 54.98556081 | -0.140034647 | 0.378135801 | -0.370328984 | 0.71113738  |    | 0.776881108 |
| Gga3          | 359.6765568 | -0.14032001  | 0.256240548 | -0.547610481 | 0.583959391 |    | 0.667158538 |
| Bmpr2         | 607.4159787 | -0.140498703 | 0.154185214 | -0.911233309 | 0.362172457 |    | 0.454635746 |
| Gm3150        | 0.093155049 | -0.140507922 | 3.641539825 | -0.038584755 | 0.969221457 | NA |             |
| Sh3bp5        | 984.1083254 | -0.14055879  | 0.197463564 | -0.711821399 | 0.47657538  |    | 0.567088904 |
| Cstf1         | 447.748343  | -0.140613357 | 0.18840875  | -0.746320733 | 0.45547369  |    | 0.54628644  |
| Neu1          | 1203.588686 | -0.140670694 | 0.181120692 | -0.77666827  | 0.437354512 |    | 0.528720729 |
| Daam2         | 62.15173467 | -0.140721452 | 0.369115759 | -0.381239351 | 0.703025652 |    | 0.77010739  |
| Pds5b         | 357.5649384 | -0.140815622 | 0.193771577 | -0.726709377 | 0.467404008 |    | 0.557958166 |
| Gm6802        | 14.13417544 | -0.140934781 | 0.59189339  | -0.238108387 | 0.81179703  |    | 0.859383741 |
| Nudt3         | 590.0854634 | -0.140951485 | 0.192832873 | -0.730951536 | 0.464808756 |    | 0.555450699 |
| Arm8          | 302.8898328 | -0.141068156 | 0.155333326 | -0.908164139 | 0.363791508 |    | 0.456136767 |
| Zbtb9         | 50.2430221  | -0.141085587 | 0.634151611 | -0.22247927  | 0.823940809 |    | 0.868947907 |
| Wasf1         | 15.99889889 | -0.141093974 | 0.5778211   | -0.244182799 | 0.807089248 |    | 0.855813712 |
| Tmem9         | 358.5320321 | -0.141387008 | 0.198627761 | -0.711818969 | 0.476576885 |    | 0.567088904 |

|          |             |              |             |              |             |             |
|----------|-------------|--------------|-------------|--------------|-------------|-------------|
| Dcakd    | 615.0118045 | -0.141420144 | 0.190641177 | -0.741813212 | 0.458200514 | 0.548784767 |
| Ap1ar    | 435.5283021 | -0.142015312 | 0.183396428 | -0.774362477 | 0.438716466 | 0.529962137 |
| Nop14    | 346.6789686 | -0.142041592 | 0.244084445 | -0.581936273 | 0.560609607 | 0.645718031 |
| R3hcc1l  | 296.2253993 | -0.142466351 | 0.215961982 | -0.659682547 | 0.509457569 | 0.59885766  |
| Rnf34    | 213.4191236 | -0.142615992 | 0.300962153 | -0.473866867 | 0.635594848 | 0.713151307 |
| Slc9a8   | 763.0179049 | -0.142945461 | 0.137412143 | -1.04026804  | 0.298215388 | 0.387776327 |
| Gm16505  | 30.5323087  | -0.142991817 | 0.570034096 | -0.250847832 | 0.801931759 | 0.851743357 |
| Gtf3a    | 290.9556053 | -0.143064163 | 0.211570564 | -0.676200696 | 0.498913231 | 0.588329028 |
| Npepl1   | 1542.086517 | -0.143204063 | 0.142845505 | -1.002510109 | 0.316097287 | 0.407472707 |
| Pigs     | 478.5039771 | -0.143259805 | 0.18263903  | -0.784387676 | 0.432812668 | 0.524233773 |
| Scamp4   | 557.267577  | -0.143322698 | 0.192704951 | -0.743741649 | 0.457032787 | 0.547749328 |
| Zfp866   | 243.2158134 | -0.143340057 | 0.197615615 | -0.725347831 | 0.468238669 | 0.558766123 |
| Arfgap1  | 793.008901  | -0.143405378 | 0.136382676 | -1.051492628 | 0.293032394 | 0.382278562 |
| Ldlrad1  | 0.469783948 | -0.14343433  | 3.624749871 | -0.039570822 | 0.96843529  | NA          |
| Tspo     | 1031.47967  | -0.143669688 | 0.138623536 | -1.036401846 | 0.30001471  | 0.389687678 |
| Zfp397   | 563.7994037 | -0.143689635 | 0.15806277  | -0.909066916 | 0.363314805 | 0.455727378 |
| Cxxc5    | 949.9734193 | -0.143707131 | 0.160658966 | -0.894485595 | 0.371062134 | 0.463263805 |
| Zan      | 7.138391729 | -0.143853912 | 0.741992837 | -0.193875068 | 0.846273706 | 0.885815321 |
| Rnmt     | 321.5766415 | -0.144074889 | 0.176985284 | -0.814050102 | 0.415616249 | 0.507733846 |
| Itgb3    | 59.44687915 | -0.144102164 | 0.504212155 | -0.285796687 | 0.775033846 | 0.829844052 |
| Parp10   | 551.5989404 | -0.14415679  | 0.173189675 | -0.832363647 | 0.405203715 | 0.497867598 |
| Pde7b    | 46.91243817 | -0.144315592 | 0.388530799 | -0.371439259 | 0.710310389 | 0.776142258 |
| Rnd1     | 228.732181  | -0.144704724 | 0.312044835 | -0.463730553 | 0.642840804 | 0.719623746 |
| Lrrn4cl  | 10.75984468 | -0.144770702 | 0.6044506   | -0.239507913 | 0.810711762 | 0.858608071 |
| Igtp     | 569.1073567 | -0.144890074 | 0.26712158  | -0.542412464 | 0.587534395 | 0.670523924 |
| Gm9762   | 73.59299532 | -0.144967766 | 0.328929067 | -0.44072653  | 0.659410988 | 0.733971642 |
| Prps1    | 483.7112994 | -0.145186021 | 0.18676581  | -0.777369372 | 0.436940877 | 0.528298306 |
| Txndc12  | 658.3746509 | -0.145331748 | 0.269339412 | -0.539585896 | 0.589482645 | 0.67238727  |
| Plcb3    | 494.0800132 | -0.145347905 | 0.1218133   | -1.193202257 | 0.232790171 | 0.315469542 |
| Nek9     | 972.8552114 | -0.145403949 | 0.139138315 | -1.045031696 | 0.296008321 | 0.385482381 |
| Tmem37   | 1355.819058 | -0.145471748 | 0.184099337 | -0.790180729 | 0.429422229 | 0.521089768 |
| Klhl22   | 345.8997936 | -0.145523299 | 0.221137235 | -0.658067825 | 0.51049455  | 0.599864358 |
| Ube2d2a  | 1493.904428 | -0.145661819 | 0.154258031 | -0.944273813 | 0.345029744 | 0.437328407 |
| Gm45062  | 171.191863  | -0.145691514 | 0.381904762 | -0.381486507 | 0.702842281 | 0.769961    |
| Nkx1-2   | 1.937360692 | -0.145766629 | 1.336749803 | -0.109045558 | 0.913166355 | 0.935950221 |
| Zbtb7a   | 795.4824118 | -0.145884396 | 0.204874899 | -0.712065738 | 0.476424069 | 0.567020152 |
| Gm6871   | 1.859534632 | -0.146159867 | 1.564486495 | -0.09342354  | 0.92556709  | 0.944967526 |
| Pdcd6ip  | 2102.127952 | -0.146379152 | 0.132466127 | -1.105030813 | 0.269146238 | 0.355473847 |
| Clip1    | 721.5684289 | -0.146436156 | 0.192300649 | -0.761495898 | 0.446360928 | 0.537474297 |
| Strn4    | 831.0513709 | -0.146579571 | 0.163330914 | -0.897439242 | 0.369484581 | 0.461733846 |
| Nsf      | 314.0454035 | -0.146608834 | 0.179947723 | -0.814727397 | 0.415228367 | 0.507332703 |
| Txlna    | 588.063399  | -0.14688734  | 0.17819051  | -0.824327513 | 0.40975349  | 0.502046679 |
| Olfr1220 | 3.911269139 | -0.147168542 | 1.037878371 | -0.141797484 | 0.887239971 | 0.917207388 |
| Olfr624  | 122.1811135 | -0.147214762 | 0.225059968 | -0.654113496 | 0.513038687 | 0.602112318 |
| Gm49359  | 74.50896084 | -0.147331219 | 0.280995496 | -0.524318793 | 0.600056828 | 0.682030159 |
| Acin1    | 1891.986945 | -0.147365138 | 0.189015625 | -0.779645273 | 0.4355997   | 0.526973012 |
| Plekhd1  | 3.634811255 | -0.147374428 | 1.212485924 | -0.121547331 | 0.903257528 | 0.928865625 |
| Gosr2    | 1072.574573 | -0.147440481 | 0.201100413 | -0.733168467 | 0.463455685 | 0.553950258 |
| Ptpn2    | 294.6492059 | -0.14764317  | 0.158202559 | -0.933253991 | 0.350688844 | 0.443081921 |
| Rbm27    | 348.9631734 | -0.147782977 | 0.149945753 | -0.98557628  | 0.324341082 | 0.415616865 |
| Actr5    | 177.2176051 | -0.147872471 | 0.237682458 | -0.622142971 | 0.533847861 | 0.621231286 |
| Tmem151b | 12.18600772 | -0.148002633 | 0.559766652 | -0.264400589 | 0.791471257 | 0.842733246 |
| Plbd2    | 1327.639913 | -0.148060415 | 0.197645689 | -0.749120388 | 0.453784648 | 0.544682157 |
| Atf6     | 1151.432896 | -0.148702571 | 0.25981867  | -0.572332123 | 0.567096991 | 0.651342014 |
| Rpl6     | 7295.933269 | -0.148729657 | 0.104592075 | -1.421997386 | 0.15502701  | 0.224050565 |
| Car5b    | 92.64762408 | -0.148937474 | 0.341828639 | -0.435708003 | 0.663048599 | 0.736922388 |
| Xrcc1    | 386.1759416 | -0.14902942  | 0.167184665 | -0.891406042 | 0.372711377 | 0.464948307 |
| Wdyh1    | 139.4937505 | -0.14943919  | 0.244197414 | -0.611960575 | 0.540563842 | 0.627461863 |
| Foxf1    | 46.05918078 | -0.149502659 | 0.301055247 | -0.496595428 | 0.619474378 | 0.699146477 |
| Ado      | 298.5527275 | -0.149554076 | 0.168819527 | -0.885881383 | 0.375681449 | 0.467695147 |
| Gm5566   | 0.921910237 | -0.149575267 | 2.355030126 | -0.063513101 | 0.949357927 | NA          |
| Dph2     | 93.3034161  | -0.14976309  | 0.264357745 | -0.566516747 | 0.571042552 | 0.655211564 |
| Zfp426   | 226.6125745 | -0.149959053 | 0.201651374 | -0.743655002 | 0.457085219 | 0.54775684  |
| Zfp763   | 75.7223628  | -0.150077958 | 0.319998621 | -0.468995641 | 0.639072752 | 0.716346391 |
| Fkbp14   | 215.4088078 | -0.150166971 | 0.308103032 | -0.48739206  | 0.625980519 | 0.70510181  |
| Mat2a    | 1756.179149 | -0.150281195 | 0.185058138 | -0.812075585 | 0.416748261 | 0.508673683 |

|               |             |              |             |              |             |             |
|---------------|-------------|--------------|-------------|--------------|-------------|-------------|
| Actg1         | 7048.777767 | -0.150336345 | 0.194128883 | -0.774415131 | 0.438685338 | 0.529962137 |
| Bzw1          | 2943.837344 | -0.150537247 | 0.120954722 | -1.2445752   | 0.213287941 | 0.292764317 |
| Dock9         | 413.3665158 | -0.150592383 | 0.2497952   | -0.602863399 | 0.546599567 | 0.632916485 |
| Klh41         | 7.043453454 | -0.150667861 | 0.758740693 | -0.198576223 | 0.842594255 | 0.882885486 |
| Cysltr2       | 6.753121792 | -0.150769432 | 0.871683978 | -0.172963408 | 0.86268019  | 0.898355133 |
| Zfp472        | 69.6846924  | -0.150983173 | 0.265068857 | -0.569599816 | 0.568949153 | 0.65316129  |
| Csnk1a1       | 2064.959653 | -0.151124759 | 0.11983726  | -1.261083227 | 0.207278863 | 0.285966663 |
| Tsn           | 866.380019  | -0.151260458 | 0.246369605 | -0.613957464 | 0.539243436 | 0.626398344 |
| Frat1         | 92.90335837 | -0.15126961  | 0.275771854 | -0.548531723 | 0.583326853 | 0.666480544 |
| Alpk2         | 3.771278875 | -0.151289137 | 0.899939299 | -0.16811038  | 0.866496444 | 0.901494843 |
| Dennd6a       | 373.9020786 | -0.151310418 | 0.165171901 | -0.916078445 | 0.359625752 | 0.451964602 |
| Zfp777        | 301.1695046 | -0.151401434 | 0.223448213 | -0.677568336 | 0.498045428 | 0.587671543 |
| Eif2s3x-ps1   | 0.494716652 | -0.151464551 | 2.587385063 | -0.058539625 | 0.953318801 | NA          |
| Chmp7         | 785.3724638 | -0.151589097 | 0.138681254 | -1.093075613 | 0.274360602 | 0.361181432 |
| Ticam1        | 321.9806807 | -0.152342124 | 0.177975422 | -0.855972818 | 0.392012815 | 0.484558764 |
| Brd9          | 312.8739186 | -0.152483364 | 0.201502264 | -0.756732757 | 0.449209986 | 0.540256214 |
| Gm45700       | 2.402717809 | -0.152904401 | 1.432884491 | -0.106710905 | 0.915018331 | 0.937256565 |
| Dcn           | 1923.216963 | -0.152944169 | 0.226037848 | -0.676630797 | 0.498640234 | 0.588129149 |
| Gm48391       | 8.755939138 | -0.153277642 | 0.668125456 | -0.229414463 | 0.818546796 | 0.864542828 |
| Crtc3         | 356.5588677 | -0.153723406 | 0.233078485 | -0.659534945 | 0.509552314 | 0.598927733 |
| Maml1         | 397.4523713 | -0.153841348 | 0.177531962 | -0.86655578  | 0.386185451 | 0.478431042 |
| Hsd17b14      | 2.126025151 | -0.154136761 | 1.381817532 | -0.111546393 | 0.911183079 | 0.934704202 |
| Trim27        | 424.3092318 | -0.154346964 | 0.143493298 | -1.075638834 | 0.282088813 | 0.369904984 |
| Lrrc45        | 351.4147536 | -0.154579061 | 0.220571618 | -0.7008112   | 0.483420848 | 0.573750947 |
| Magi3         | 620.645412  | -0.154663476 | 0.242676038 | -0.637324874 | 0.523913252 | 0.612177733 |
| Zscan21       | 428.5134206 | -0.154913125 | 0.197973909 | -0.782492632 | 0.433925114 | 0.525245338 |
| Eif3l         | 1533.152586 | -0.154943891 | 0.13925258  | -1.11268237  | 0.26584487  | 0.351709091 |
| Hhipl2        | 9.964335715 | -0.155010343 | 0.968995533 | -0.159970132 | 0.872904602 | 0.905948938 |
| Nr1h2         | 889.6087335 | -0.155042577 | 0.129779686 | -1.194659821 | 0.232219967 | 0.314810392 |
| Wdr13         | 699.1020803 | -0.155053849 | 0.210342342 | -0.737149957 | 0.461031162 | 0.551485216 |
| 5031439G07Rik | 778.9291649 | -0.155120907 | 0.175138929 | -0.885702044 | 0.375778107 | 0.467781319 |
| Apex1         | 592.7428533 | -0.155218279 | 0.181576342 | -0.85483757  | 0.392641076 | 0.485124298 |
| Stat6         | 1437.220749 | -0.1552392   | 0.130684335 | -1.187894477 | 0.234874986 | 0.317663527 |
| Slc36a1       | 933.4933782 | -0.155340709 | 0.152814347 | -1.016532235 | 0.309376005 | 0.400018365 |
| Prkag1        | 741.0860383 | -0.155494952 | 0.140563029 | -1.10622938  | 0.268627249 | 0.354921905 |
| Ylpm1         | 523.9947211 | -0.155714406 | 0.247966724 | -0.627964926 | 0.530026917 | 0.617881488 |
| Pphln1        | 361.6902528 | -0.155884118 | 0.214060125 | -0.728225859 | 0.466475339 | 0.556973776 |
| Riok1         | 199.0479925 | -0.156004366 | 0.178715852 | -0.872918458 | 0.382707525 | 0.474844806 |
| Olfr365       | 13.96928687 | -0.156074849 | 0.629437881 | -0.247959098 | 0.804166054 | 0.853353578 |
| Pfn1          | 4977.769904 | -0.156125386 | 0.127529753 | -1.224227149 | 0.22086655  | 0.301636862 |
| Oga           | 1415.065072 | -0.156166586 | 0.13470195  | -1.159349108 | 0.246313912 | 0.330226453 |
| Fktn          | 224.5679326 | -0.156315145 | 0.198300988 | -0.788272142 | 0.430537539 | 0.522134833 |
| Trim71        | 8.60930759  | -0.156663253 | 1.087649054 | -0.144038421 | 0.88547013  | 0.916099938 |
| Snx2          | 1005.538342 | -0.156816951 | 0.195644836 | -0.801538923 | 0.42281972  | 0.514545909 |
| Zfp629        | 389.8469638 | -0.157284339 | 0.174909983 | -0.899230201 | 0.368530057 | 0.460845038 |
| Aff4          | 1531.769111 | -0.157509064 | 0.210313102 | -0.748926541 | 0.453901483 | 0.544772149 |
| Pgap1         | 319.4410813 | -0.157630518 | 0.258642202 | -0.609453975 | 0.542213571 | 0.629002956 |
| Ppp2r2c       | 2.897055073 | -0.157833374 | 1.450821441 | -0.108788972 | 0.913369871 | 0.936102534 |
| Ogg1          | 92.06380643 | -0.157986557 | 0.246600601 | -0.640657629 | 0.521745148 | 0.610313661 |
| S100a16       | 442.8168565 | -0.158003431 | 0.18304236  | -0.863206918 | 0.388023711 | 0.480394206 |
| Gm42421       | 1.311500489 | -0.158122695 | 2.066650457 | -0.076511581 | 0.9390121   | NA          |
| Zc3h12d       | 77.03363743 | -0.158235007 | 0.412115122 | -0.383958264 | 0.701009381 | 0.768836861 |
| Psen1         | 742.514447  | -0.158483032 | 0.152676219 | -1.038033518 | 0.299254451 | 0.388848314 |
| Pla1a         | 1079.913783 | -0.158732919 | 0.233936587 | -0.678529686 | 0.497435908 | 0.587155533 |
| Gm9057        | 2.756822509 | -0.158834833 | 1.119916474 | -0.141827392 | 0.887216347 | 0.917207388 |
| Triml2        | 2.311449725 | -0.158920803 | 1.281305986 | -0.124030329 | 0.901291261 | 0.927514996 |
| 2610005L07Rik | 421.5642279 | -0.159017661 | 0.178328739 | -0.891710788 | 0.372547797 | 0.46477847  |
| Taf4b         | 59.81752806 | -0.159052013 | 0.315619334 | -0.503936217 | 0.614306199 | 0.694752029 |
| Tvp23b        | 323.6366361 | -0.159266803 | 0.152870937 | -1.041838334 | 0.297486638 | 0.387023215 |
| Mks1          | 68.77904391 | -0.159816624 | 0.332450352 | -0.480723281 | 0.630713183 | 0.709167546 |
| Cactin        | 318.4987108 | -0.159836257 | 0.158510054 | -1.008366681 | 0.313278462 | 0.404389432 |
| Asic2         | 2.179837209 | -0.159983111 | 1.655498225 | -0.09663744  | 0.923014323 | 0.942982452 |
| Faap100       | 159.3472813 | -0.160073218 | 0.206165287 | -0.776431475 | 0.437494266 | 0.528852177 |
| H1f2          | 1141.936015 | -0.160083556 | 0.380705145 | -0.420492232 | 0.674125903 | 0.745830255 |
| Lzic          | 127.442754  | -0.160403644 | 0.258028922 | -0.621649865 | 0.534172125 | 0.621523777 |
| Rps26         | 4227.550393 | -0.160422289 | 0.166095442 | -0.965844016 | 0.334122224 | 0.42621774  |

|               |             |              |             |              |             |             |
|---------------|-------------|--------------|-------------|--------------|-------------|-------------|
| Bcat1         | 3.98160741  | -0.160457525 | 1.450533557 | -0.110619657 | 0.911917959 | 0.935232952 |
| Purb          | 789.1197048 | -0.160530395 | 0.132309779 | -1.213291994 | 0.225018203 | 0.306447541 |
| Ccdc150       | 0.906820463 | -0.160569874 | 3.282298991 | -0.048919941 | 0.960983097 | NA          |
| CrelD2        | 854.1838955 | -0.160681189 | 0.322105907 | -0.498845832 | 0.617887997 | 0.697876942 |
| Al661453      | 582.2902285 | -0.160997151 | 0.162683653 | -0.989633245 | 0.322353414 | 0.413691735 |
| Vps18         | 348.0330388 | -0.161197814 | 0.17756359  | -0.907831462 | 0.363967273 | 0.456257344 |
| PsmD8         | 2071.402174 | -0.161227497 | 0.174815126 | -0.922274297 | 0.356385517 | 0.448719372 |
| Lrwd1         | 226.0492532 | -0.16129337  | 0.21035536  | -0.766766151 | 0.443220565 | 0.534296718 |
| Pigm          | 386.685932  | -0.16133345  | 0.174769748 | -0.923126012 | 0.35594154  | 0.448325924 |
| Appbp2        | 633.2828239 | -0.161591148 | 0.133273065 | -1.212481664 | 0.225328057 | 0.306820505 |
| Olfr457       | 2.18143809  | -0.161879232 | 1.356943732 | -0.119296938 | 0.90504011  | 0.930081608 |
| 2410004B18Rik | 132.208529  | -0.16205743  | 0.223015072 | -0.726665818 | 0.467430698 | 0.557958166 |
| Srsf7         | 854.3898573 | -0.162152624 | 0.183398629 | -0.884153959 | 0.376613108 | 0.468615449 |
| Gm6055        | 1.758351104 | -0.162191153 | 2.914401718 | -0.055651612 | 0.955619348 | 0.967537632 |
| Styx          | 259.7760513 | -0.162689593 | 0.217007356 | -0.749696215 | 0.453437688 | 0.544304021 |
| Nifk          | 438.7855985 | -0.162786881 | 0.199409924 | -0.816342925 | 0.41430403  | 0.506530057 |
| Tpd52l2       | 843.6854221 | -0.162788706 | 0.196198082 | -0.82971609  | 0.406699322 | 0.49916559  |
| Olfr1328      | 10.67331635 | -0.162826095 | 0.596814621 | -0.272825245 | 0.784987553 | 0.837503461 |
| Cstf2t        | 447.2883641 | -0.162855154 | 0.131563512 | -1.237844387 | 0.215773766 | 0.295676487 |
| Cmtm4         | 815.7672031 | -0.16301929  | 0.139222796 | -1.170923836 | 0.241629393 | 0.325250525 |
| 1700093K21Rik | 2.418933773 | -0.163266633 | 1.508330254 | -0.108243293 | 0.913802704 | 0.936433548 |
| Cdk14         | 46.25968512 | -0.163635218 | 0.436302328 | -0.375050069 | 0.70762323  | 0.773801208 |
| Gmnn          | 148.0354765 | -0.16380265  | 0.299884172 | -0.546219724 | 0.584914909 | 0.668026353 |
| Cdc5l         | 440.3866393 | -0.164385999 | 0.148138196 | -1.109680041 | 0.267136927 | 0.353253981 |
| Atp2b1        | 633.6553079 | -0.164419276 | 0.142076215 | -1.157261095 | 0.247165703 | 0.331160084 |
| Magee2        | 0.594612368 | -0.164680389 | 2.963660562 | -0.055566549 | 0.955687114 | NA          |
| Rabif         | 321.3213622 | -0.165063471 | 0.183853954 | -0.897796689 | 0.36929395  | 0.461563289 |
| Ing2          | 234.4759731 | -0.165085246 | 0.223638035 | -0.738180543 | 0.460404745 | 0.550998953 |
| Gcnt2         | 446.6893469 | -0.165129427 | 0.279744683 | -0.590286205 | 0.554998786 | 0.640077074 |
| Ifi214        | 5.109929302 | -0.165236477 | 1.101728211 | -0.149979346 | 0.88078091  | 0.912420421 |
| Nrxn1         | 57.66417107 | -0.165346928 | 0.475465728 | -0.347757827 | 0.728022064 | 0.791285952 |
| Sbf1          | 1032.622045 | -0.165446055 | 0.191431631 | -0.86425662  | 0.387446935 | 0.479784655 |
| Prr5          | 113.9003472 | -0.165495724 | 0.307275024 | -0.538591525 | 0.590168737 | 0.67303476  |
| Gm5173        | 2.250159226 | -0.165518018 | 1.170282188 | -0.141434279 | 0.887526875 | 0.917448349 |
| Tor2a         | 896.5541247 | -0.165578133 | 0.190130503 | -0.870865699 | 0.383827488 | 0.475924868 |
| Kif21a        | 915.046009  | -0.165850941 | 0.204369143 | -0.811526329 | 0.417063479 | 0.508845501 |
| 2610318N02Rik | 2.56055786  | -0.166079524 | 1.581470395 | -0.105015892 | 0.916363199 | 0.938155165 |
| Dync1i2       | 1294.692964 | -0.166088495 | 0.142874961 | -1.162474476 | 0.245042787 | 0.328780846 |
| Celf5         | 5.34830372  | -0.16618357  | 0.812578418 | -0.204513886 | 0.837951942 | 0.879259537 |
| Morc1         | 1.309790932 | -0.166284641 | 2.55859886  | -0.064990508 | 0.948181558 | NA          |
| Gm2225        | 5.246984664 | -0.166335825 | 1.00201707  | -0.166000989 | 0.868156172 | 0.902734152 |
| Acox1         | 0.98817401  | -0.166366934 | 2.027501696 | -0.082055139 | 0.934602866 | NA          |
| Lpar6         | 631.5803811 | -0.166437446 | 0.246966652 | -0.673926801 | 0.500357852 | 0.589869349 |
| Sumo3         | 1370.00022  | -0.166442309 | 0.143234702 | -1.162025035 | 0.245225296 | 0.328986206 |
| Gnl1          | 431.0123564 | -0.166444858 | 0.172184552 | -0.966665451 | 0.333711304 | 0.425799738 |
| Rara          | 499.7143965 | -0.166546958 | 0.199530457 | -0.834694413 | 0.403889788 | 0.496861965 |
| Atp1b3        | 609.0543543 | -0.166744485 | 0.210362031 | -0.792654854 | 0.42797894  | 0.519930519 |
| Smarce1       | 880.1780034 | -0.167180136 | 0.130927223 | -1.276893627 | 0.201639804 | 0.279317087 |
| Al837181      | 391.2897933 | -0.167275121 | 0.14772345  | -1.132353196 | 0.257485974 | 0.342404125 |
| Gm10297       | 41.69758139 | -0.167459448 | 0.37552958  | -0.445928782 | 0.655648691 | 0.730603234 |
| Hmg20a        | 404.6723857 | -0.167536632 | 0.14197932  | -1.180007288 | 0.237997316 | 0.321325592 |
| Ppp2r5b       | 249.8844864 | -0.167679446 | 0.209157435 | -0.801690104 | 0.422732241 | 0.514545909 |
| Pcyox1        | 2653.50063  | -0.167731364 | 0.169417865 | -0.990045321 | 0.322151967 | 0.413557737 |
| Ak9           | 5.591610284 | -0.167822564 | 0.938317038 | -0.178854862 | 0.858051666 | 0.894825803 |
| Alg12         | 215.4213314 | -0.168268113 | 0.259199973 | -0.649182602 | 0.516220356 | 0.604847053 |
| Bcr           | 654.5487093 | -0.168343329 | 0.206507631 | -0.815191809 | 0.414962526 | 0.507171903 |
| Gm12020       | 0.601318398 | -0.168372332 | 2.563279095 | -0.065686305 | 0.947627576 | NA          |
| Gan           | 227.6926981 | -0.16864706  | 0.152898447 | -1.103000475 | 0.270026959 | 0.356438986 |
| Gm6210        | 1.519381718 | -0.168681948 | 1.606720099 | -0.104985273 | 0.916387495 | NA          |
| ArmC6         | 87.1516643  | -0.168733968 | 0.32249973  | -0.52320654  | 0.600830531 | 0.68277289  |
| Cyld          | 447.1741824 | -0.168903114 | 0.181236356 | -0.931949404 | 0.351362674 | 0.443673125 |
| Alg10b        | 682.5736047 | -0.169170071 | 0.202801182 | -0.834167084 | 0.404186837 | 0.497083912 |
| Prkce         | 253.984228  | -0.169581009 | 0.153166817 | -1.107165453 | 0.28222401  | 0.354441942 |
| Sgpl1         | 1614.204501 | -0.169687959 | 0.171979313 | -0.986676576 | 0.323801217 | 0.415143502 |
| Foxn2         | 281.2148508 | -0.169721809 | 0.179196989 | -0.947124226 | 0.343575481 | 0.435938881 |
| Oxr1          | 1109.247811 | -0.170128977 | 0.200904393 | -0.846815616 | 0.397097903 | 0.489883409 |



|               |             |              |             |              |             |             |
|---------------|-------------|--------------|-------------|--------------|-------------|-------------|
| Btg2          | 1591.6444   | -0.170251026 | 0.415172048 | -0.41007343  | 0.681752083 | 0.752606975 |
| Klhdc7a       | 804.1540407 | -0.170292936 | 0.278694172 | -0.611038742 | 0.541173932 | 0.628041743 |
| Car7          | 32.48397647 | -0.170293605 | 0.569052709 | -0.299258053 | 0.764743158 | 0.820939573 |
| Rhoa          | 2824.231979 | -0.170648682 | 0.150943639 | -1.1305457   | 0.258246353 | 0.343217242 |
| Plekha5       | 777.1094333 | -0.170710575 | 0.202038366 | -0.844941376 | 0.398143571 | 0.490891126 |
| Slco4c1       | 0.58565669  | -0.170875184 | 2.894027544 | -0.059044077 | 0.952917001 | NA          |
| Lrp10         | 1118.747904 | -0.170958609 | 0.212302595 | -0.805259157 | 0.420670145 | 0.512548931 |
| Olfr729       | 5.411450797 | -0.171128126 | 0.800956895 | -0.213654601 | 0.830816417 | 0.873982369 |
| Cpeb3         | 172.8881738 | -0.171395843 | 0.278361052 | -0.615732129 | 0.538071329 | 0.625292434 |
| Mrgbp         | 303.6711803 | -0.171519863 | 0.195962775 | -0.875267573 | 0.381428333 | 0.473466596 |
| Hdac2         | 604.3103868 | -0.17176557  | 0.216034072 | -0.795085553 | 0.426563738 | 0.518543825 |
| Gm49322       | 53.96187902 | -0.171800668 | 0.50416967  | -0.340759626 | 0.733284547 | 0.795505837 |
| Rpl36a        | 2008.058185 | -0.171926991 | 0.146535372 | -1.173279791 | 0.240683624 | 0.324105404 |
| Phka2         | 670.2334914 | -0.172074146 | 0.177959203 | -0.966930306 | 0.333578875 | 0.425694488 |
| Rps11         | 4742.717911 | -0.172369112 | 0.140654087 | -1.225482428 | 0.220393507 | 0.30113557  |
| Cacfd1        | 608.6718221 | -0.172429999 | 0.209873975 | -0.821588284 | 0.41131126  | 0.50359339  |
| Zfp263        | 403.4371978 | -0.172627918 | 0.194216506 | -0.888842672 | 0.374087639 | 0.466289835 |
| Edaradd       | 3.944639287 | -0.172714545 | 0.98630178  | -0.175113285 | 0.860990619 | 0.897088869 |
| Ash2l         | 432.0880377 | -0.172723274 | 0.157579673 | -1.096101232 | 0.273034476 | 0.359769032 |
| Zmym1         | 84.65163049 | -0.172786634 | 0.289628107 | -0.596581027 | 0.550787142 | 0.636511605 |
| Eef2          | 22906.68445 | -0.172838154 | 0.218685242 | -0.79035125  | 0.429322664 | 0.521043125 |
| Dyrk1a        | 512.5837202 | -0.172896088 | 0.170258335 | -1.015492654 | 0.309871047 | 0.400567304 |
| Gm2446        | 35.47176134 | -0.173030923 | 0.469143654 | -0.3688229   | 0.712259735 | 0.777624333 |
| Tbl1xr1       | 746.4138414 | -0.173473112 | 0.194950962 | -0.889829471 | 0.373557459 | 0.465767004 |
| Trim12c       | 262.4933001 | -0.173653158 | 0.291222159 | -0.596291019 | 0.535098083 | 0.636671697 |
| Cep104        | 215.5158034 | -0.173798259 | 0.222868449 | -0.779824419 | 0.435494231 | 0.526920202 |
| Ctsd          | 5975.778301 | -0.173813151 | 0.117121994 | -1.484035116 | 0.137799605 | 0.202531056 |
| Pip4k2b       | 423.0555022 | -0.173970659 | 0.163610645 | -1.063321148 | 0.287636338 | 0.376304527 |
| Kri1          | 301.9670713 | -0.174545528 | 0.211641911 | -0.824720998 | 0.409530008 | 0.501917151 |
| Eya3          | 363.397884  | -0.174940233 | 0.195758618 | -0.893652779 | 0.371507698 | 0.463752159 |
| Kpnb1         | 2823.730565 | -0.174947011 | 0.151247402 | -1.156694324 | 0.24739727  | 0.33141825  |
| Prr3          | 200.0098185 | -0.175256239 | 0.215869679 | -0.811861306 | 0.416871219 | 0.508699675 |
| Cobl          | 531.9751047 | -0.175869308 | 0.227783889 | -0.772088443 | 0.440062047 | 0.531390974 |
| Fras1         | 74.75227647 | -0.175925268 | 0.527753741 | -0.333347269 | 0.738872162 | 0.800171047 |
| Gm7451        | 0.598445202 | -0.175972493 | 2.961007828 | -0.059429932 | 0.952609673 | NA          |
| Ube2e3        | 642.422949  | -0.176075029 | 0.188484894 | -0.934159893 | 0.350221421 | 0.442592645 |
| Rpl18a        | 7071.172078 | -0.176175074 | 0.157052416 | -1.121759717 | 0.261964618 | 0.347328103 |
| Inpp1         | 865.0575281 | -0.176342351 | 0.116122266 | -1.518592058 | 0.128865211 | 0.191550625 |
| Rpl10         | 2228.559396 | -0.176374003 | 0.153118669 | -1.15187785  | 0.249371272 | 0.333617    |
| Eif3h         | 2609.34143  | -0.176475757 | 0.119927269 | -1.471523182 | 0.141149683 | 0.206618851 |
| Snx13         | 566.2469266 | -0.176562138 | 0.167574594 | -1.053633094 | 0.292050931 | 0.381319161 |
| Bcl3          | 699.0768171 | -0.176586886 | 0.172827331 | -1.02175324  | 0.306897706 | 0.397296081 |
| Rsu1          | 661.5635597 | -0.176610918 | 0.194343635 | -0.908755866 | 0.363479008 | 0.455899803 |
| Sltm          | 850.8129567 | -0.176753461 | 0.153712533 | -1.149896224 | 0.250186616 | 0.334550273 |
| Lamtor3       | 333.1910216 | -0.17676146  | 0.172673565 | -1.023674122 | 0.305989222 | 0.396300559 |
| Vwa5b2        | 0.598347631 | -0.176824554 | 2.961048493 | -0.059716872 | 0.952381134 | NA          |
| Gm13736       | 67.39365682 | -0.17700162  | 0.315185167 | -0.561579791 | 0.574402352 | 0.658092157 |
| Usp1          | 378.1789656 | -0.17705829  | 0.179504142 | -0.986374403 | 0.323949421 | 0.415271053 |
| Olfr64        | 1.774196902 | -0.177098156 | 1.483799861 | -0.119354477 | 0.904994526 | 0.930081608 |
| Epc2          | 299.8213098 | -0.177232674 | 0.172772875 | -1.025813071 | 0.304979703 | 0.395092265 |
| Atp6v1b2      | 898.7249142 | -0.177471313 | 0.112245924 | -1.581093607 | 0.113856636 | 0.172627885 |
| Gm9625        | 16.05672286 | -0.177566429 | 0.665085243 | -0.266982963 | 0.789482278 | 0.841140796 |
| Olfr30        | 1.558182755 | -0.177643306 | 1.575134014 | -0.112779804 | 0.91020513  | NA          |
| Wdr5          | 695.7393685 | -0.177800496 | 0.176349385 | -1.008228613 | 0.313344725 | 0.404444342 |
| Slc4a4        | 1076.639943 | -0.177911598 | 0.198356774 | -0.896927263 | 0.369757731 | 0.461939748 |
| Rps28         | 2378.747851 | -0.177914117 | 0.121645696 | -1.462559902 | 0.143587842 | 0.209776804 |
| Pcbp2         | 4251.622119 | -0.178007977 | 0.111772361 | -1.592593875 | 0.111251329 | 0.169174262 |
| Srm           | 460.8491374 | -0.178145175 | 0.266919513 | -0.667411582 | 0.50450927  | 0.593777979 |
| Gm10364       | 0.981267178 | -0.178385721 | 2.00715791  | -0.088874782 | 0.929181425 | NA          |
| Nacc2         | 558.8046603 | -0.179297272 | 0.167042981 | -1.073360107 | 0.283109576 | 0.371073634 |
| Olfr715b      | 4.921246971 | -0.179631496 | 0.986955254 | -0.182005715 | 0.855578241 | 0.892900092 |
| Cct2          | 2612.770424 | -0.180063815 | 0.141260947 | -1.274689274 | 0.202419245 | 0.280237395 |
| Slc35b4       | 360.1536962 | -0.180213079 | 0.147905179 | -1.218436566 | 0.223058117 | 0.304191247 |
| 2900026A02Rik | 1965.35426  | -0.180229254 | 0.228704618 | -0.78804379  | 0.430671092 | 0.52216202  |
| Dennd4b       | 197.3890131 | -0.180254804 | 0.213892102 | -0.842737071 | 0.399375509 | 0.492267637 |
| Nutf2-ps1     | 442.2835    | -0.180580392 | 0.223835224 | -0.806755919 | 0.41980712  | 0.511643679 |

|         |             |              |             |              |             |             |
|---------|-------------|--------------|-------------|--------------|-------------|-------------|
| Map9    | 18.20844361 | -0.180629638 | 0.529097866 | -0.341391734 | 0.732808697 | 0.795206079 |
| Wbp11   | 667.7313666 | -0.180814622 | 0.138034914 | -1.30991948  | 0.190223077 | 0.265965965 |
| Tk1     | 739.8278942 | -0.180913591 | 0.260267462 | -0.695106447 | 0.486988595 | 0.57690095  |
| Gon4l   | 681.7783699 | -0.181075602 | 0.170174283 | -1.064059735 | 0.28730164  | 0.375953205 |
| Kat5    | 370.2124586 | -0.18124217  | 0.154382394 | -1.173982117 | 0.240402189 | 0.323828738 |
| Rac1    | 2817.030143 | -0.181256844 | 0.140357398 | -1.291395018 | 0.196566737 | 0.27317761  |
| Rhpn2   | 364.5465533 | -0.18173288  | 0.17769632  | -1.022716062 | 0.306442115 | 0.39673642  |
| Gm6043  | 0.594636151 | -0.181797236 | 2.491277483 | -0.072973499 | 0.941827206 | NA          |
| Rcc1    | 167.936493  | -0.181818142 | 0.22196438  | -0.819132073 | 0.412711065 | 0.504908377 |
| Med16   | 401.5708258 | -0.182160356 | 0.161957361 | -1.124742679 | 0.260698091 | 0.345893147 |
| Dtx2    | 139.8594573 | -0.182193951 | 0.208491404 | -0.87386793  | 0.382190181 | 0.474274146 |
| Strbp   | 978.1392188 | -0.182246955 | 0.188142644 | -0.968663729 | 0.332712995 | 0.42484743  |
| Bcdin3d | 83.73065836 | -0.182283684 | 0.257579016 | -0.707680643 | 0.479143601 | 0.56938799  |
| Tmem26  | 14.69758896 | -0.182369953 | 0.700940428 | -0.260178962 | 0.794725732 | 0.845390311 |
| Epha1   | 905.0953488 | -0.182564762 | 0.238828811 | -0.764416829 | 0.444618883 | 0.535829943 |
| Gm36210 | 1.996935334 | -0.182809946 | 1.420873863 | -0.128660221 | 0.897626512 | 0.924692536 |
| Crrh2   | 1.843434699 | -0.182931268 | 1.370625345 | -0.133465552 | 0.893825206 | 0.922264323 |
| Rtf1    | 505.5331222 | -0.183207532 | 0.153875089 | -1.190625028 | 0.233800822 | 0.316562339 |
| Mre11a  | 179.5364347 | -0.183325513 | 0.323288672 | -0.56706445  | 0.570670394 | 0.654916788 |
| Muc1    | 44.04068798 | -0.183341802 | 0.602003091 | -0.304552924 | 0.760706679 | 0.817739293 |
| Ptbp2   | 339.8696696 | -0.183347731 | 0.1929101   | -0.950430957 | 0.341893321 | 0.434289347 |
| Muc2    | 3.616468668 | -0.1835632   | 1.071605143 | -0.171297424 | 0.863989906 | 0.899334468 |
| Sh3bp5l | 290.8181665 | -0.183601038 | 0.194618035 | -0.943391695 | 0.34548059  | 0.437802207 |
| Actb    | 15785.67518 | -0.183791756 | 0.219462238 | -0.837464148 | 0.402331721 | 0.495385161 |
| Sergef  | 66.81637545 | -0.184201665 | 0.2880157   | -0.639554251 | 0.522462433 | 0.610943107 |
| Ccdc90b | 158.0731794 | -0.184707946 | 0.242252914 | -0.762459127 | 0.445786029 | 0.536857885 |
| Agpat5  | 250.3162143 | -0.184924305 | 0.197196455 | -0.937766882 | 0.348364224 | 0.440801106 |
| Rtca    | 198.7872001 | -0.184927295 | 0.240986898 | -0.767374892 | 0.442858652 | 0.533935948 |
| Npff    | 34.10554726 | -0.185093436 | 0.466895482 | -0.396434412 | 0.691784584 | 0.761217556 |
| Itgb3bp | 61.80560788 | -0.185102314 | 0.419554093 | -0.441188197 | 0.659076758 | 0.733751751 |
| Zfp341  | 50.88076196 | -0.185213381 | 0.293261625 | -0.631563645 | 0.527672049 | 0.6158522   |
| Zbtb37  | 270.6307944 | -0.185219113 | 0.257044503 | -0.720572163 | 0.471172786 | 0.561834906 |
| Pign    | 466.944549  | -0.185489873 | 0.16975764  | -1.092674671 | 0.274536664 | 0.361357401 |
| Gpatch8 | 609.0054117 | -0.185541029 | 0.175492963 | -1.057256229 | 0.290394664 | 0.379389089 |
| Cap1    | 1524.435025 | -0.185597364 | 0.167030848 | -1.111156209 | 0.266501117 | 0.352495231 |
| Ubfd1   | 677.8521385 | -0.185732068 | 0.199534645 | -0.930826166 | 0.351943492 | 0.444287545 |
| Ccny    | 765.8941625 | -0.18589179  | 0.152339533 | -1.220246551 | 0.222371425 | 0.303312728 |
| Rnf126  | 638.6861445 | -0.186113409 | 0.160088044 | -1.162569079 | 0.245004382 | 0.328755192 |
| Pdss1   | 97.48415852 | -0.186258562 | 0.228520521 | -0.815062742 | 0.415036397 | 0.507171903 |
| Cep70   | 118.3775671 | -0.186460339 | 0.248639967 | -0.749921025 | 0.453302271 | 0.54418679  |
| Sbno1   | 989.6395106 | -0.186470679 | 0.157454866 | -1.184280196 | 0.236302166 | 0.319289793 |
| Gimap6  | 181.7868833 | -0.186562508 | 0.250279205 | -0.745417536 | 0.456019346 | 0.546863943 |
| Cacng7  | 28.76586263 | -0.186608905 | 0.401015886 | -0.46534043  | 0.641687686 | 0.718710444 |
| Lemd2   | 546.6371444 | -0.186617192 | 0.153718953 | -1.214015499 | 0.224741806 | 0.306144491 |
| Wdr43   | 561.5858356 | -0.186918578 | 0.184059292 | -1.015534594 | 0.309851065 | 0.400567304 |
| Rab33b  | 199.3015139 | -0.187068569 | 0.187543058 | -0.997469973 | 0.318536442 | 0.409965972 |
| Gng3    | 0.608607716 | -0.18723625  | 2.560606243 | -0.073121844 | 0.941709159 | NA          |
| Ccng1   | 715.374331  | -0.187288843 | 0.187013801 | -1.001470704 | 0.316599296 | 0.407996433 |
| Ccdc160 | 3.309873006 | -0.187318631 | 1.141691319 | -0.16407117  | 0.869675117 | 0.903597111 |
| Ran     | 1861.906552 | -0.187326377 | 0.279935969 | -0.669175805 | 0.503383338 | 0.592738617 |
| Abcb9   | 47.63667481 | -0.187689437 | 0.393625498 | -0.476822355 | 0.633488626 | 0.711631134 |
| Gm37559 | 0.522531264 | -0.187837412 | 2.645000568 | -0.071016019 | 0.943385006 | NA          |
| Vps13a  | 282.0475141 | -0.187922525 | 0.189419314 | -0.992098012 | 0.321149716 | 0.412581791 |
| Shkbp1  | 198.8194593 | -0.188049309 | 0.2644465   | -0.711105304 | 0.477018983 | 0.567496136 |
| Klf13   | 777.0452771 | -0.188099696 | 0.286144216 | -0.65735977  | 0.510949613 | 0.600239043 |
| Per2    | 369.8905559 | -0.188144266 | 0.483966136 | -0.388755023 | 0.697457375 | 0.765828502 |
| Klhdc2  | 721.051784  | -0.18820031  | 0.121247146 | -1.552204039 | 0.12061341  | 0.181120205 |
| Thap12  | 466.0134054 | -0.188221337 | 0.197908054 | -0.951054458 | 0.341576732 | 0.433941208 |
| Slc23a4 | 4.956635734 | -0.188245772 | 1.003974527 | -0.187500546 | 0.851268196 | 0.890004918 |
| Fam20c  | 951.3663812 | -0.18832665  | 0.225594934 | -0.834799996 | 0.403830328 | 0.496824668 |
| Skida1  | 12.85073192 | -0.188342148 | 0.708322744 | -0.265898772 | 0.790317171 | 0.841714695 |
| Gm3200  | 5.901264969 | -0.188494146 | 0.880328032 | -0.214118078 | 0.830454979 | 0.8737639   |
| Pdpr    | 133.5619825 | -0.188874362 | 0.230630831 | -0.818946716 | 0.412816815 | 0.505001511 |
| Gorab   | 95.9037313  | -0.188942869 | 0.25498822  | -0.740986657 | 0.45870153  | 0.549307649 |
| Oprd1   | 1.549163372 | -0.1889539   | 1.446783056 | -0.130602787 | 0.896089538 | NA          |
| Gm47832 | 0.609860284 | -0.189167062 | 2.954851182 | -0.06401915  | 0.948954978 | NA          |

|               |             |              |             |              |                |             |
|---------------|-------------|--------------|-------------|--------------|----------------|-------------|
| 493051815Rik  | 26.53933381 | -0.1893314   | 0.411280955 | -0.460345653 | 0.645268137    | 0.721393613 |
| Celf1         | 2086.848346 | -0.189386054 | 0.178967061 | -1.058217375 | 0.289956352    | 0.378874522 |
| Nudcd2        | 566.1622616 | -0.189455888 | 0.167733582 | -1.129504814 | 0.25868494     | 0.343676812 |
| Sumo2         | 1539.119207 | -0.189852522 | 0.17308886  | -1.096850034 | 0.272706954    | 0.359404347 |
| Senp5         | 177.9274907 | -0.189972396 | 0.193049136 | -0.9840624   | 0.325084833    | 0.416538612 |
| Htt           | 560.2382439 | -0.190039282 | 0.208989655 | -0.909323868 | 0.363179196    | 0.455624323 |
| Ppp4c         | 822.3521928 | -0.19009632  | 0.176223951 | -1.078720109 | 0.280712518    | 0.368326807 |
| Zhx3          | 1326.142682 | -0.190187026 | 0.265103317 | -0.717407191 | 0.473122884    | 0.563844734 |
| Ankrd11       | 1367.221709 | -0.190361562 | 0.153188648 | -1.242661019 | 0.213992774    | 0.293574675 |
| Smc6          | 446.4813578 | -0.1906945   | 0.194507953 | -0.980394363 | 0.326891491    | 0.418507521 |
| Larp4b        | 2050.962742 | -0.190744357 | 0.190933712 | -0.999008273 | 0.317790684    | 0.409284247 |
| Nudt4         | 3722.10845  | -0.190912852 | 0.155710765 | -1.226073563 | 0.220170994    | 0.300879767 |
| Nle1          | 123.2719069 | -0.191067964 | 0.281979705 | -0.677594736 | 0.498028685    | 0.587671543 |
| Plxna2        | 513.3364118 | -0.191279616 | 0.148453123 | -1.288484959 | 0.197577201    | 0.274358241 |
| Rbpms         | 1250.951982 | -0.191788785 | 0.161420265 | -1.18813325  | 0.234780916    | 0.317586691 |
| Lipa          | 3143.804701 | -0.191969199 | 0.174527142 | -1.099938937 | 0.271358728    | 0.357920588 |
| Zbtb22        | 331.5580355 | -0.192541265 | 0.171686233 | -1.121471774 | 0.2620871      | 0.347411622 |
| Get4          | 607.0270484 | -0.19256743  | 0.195015425 | -0.987447169 | 0.32342347     | 0.414721573 |
| Pnrc2         | 1207.715484 | -0.192660276 | 0.130697411 | -1.474094045 | 0.140456272    | 0.205748283 |
| Taf7          | 101.9688421 | -0.19278804  | 0.263611041 | -0.731335223 | 0.464574421    | 0.555209585 |
| Ankrd54       | 257.0880492 | -0.192892085 | 0.178401119 | -1.081226878 | 0.279596205    | 0.367109989 |
| Itih5         | 346.7587764 | -0.193101143 | 0.277558352 | -0.69571368  | 0.486608156    | 0.576799227 |
| Gm5898        | 1.828298623 | -0.193177708 | 1.486164384 | -0.129984078 | 0.896579023    | 0.924060165 |
| Rpl17         | 7715.544971 | -0.193180967 | 0.111098116 | -1.738832071 | 0.082064306    | 0.13011833  |
| Gtpbp4        | 814.8999488 | -0.193294471 | 0.233035561 | -0.829463411 | 0.406842233    | 0.499269103 |
| Rabl6         | 596.4645691 | -0.193371328 | 0.158512934 | -1.21990883  | 0.222499438    | 0.303453634 |
| Dnajc24       | 85.55487878 | -0.193451254 | 0.264800492 | -0.730554737 | 0.465051168    | 0.555613506 |
| Tmeff1        | 8.65552357  | -0.193671167 | 0.903457799 | -0.21436659  | 0.830261194    | 0.873721779 |
| 4930431P19Rik | 18.54134864 | -0.194043566 | 0.431776418 | -0.449407514 | 0.653137712    | 0.728281229 |
| Fbxo11        | 648.1849762 | -0.194140563 | 0.177346993 | -1.09469329  | 0.273651029    | 0.360358624 |
| Msx1          | 6.923097731 | -0.194157802 | 0.905328385 | -0.214461189 | 0.830187429    | 0.873698086 |
| Med10         | 298.6203233 | -0.194327071 | 0.201663041 | -0.963622635 | 0.335235155    | 0.427392231 |
| Gtpbp1        | 449.5179576 | -0.194565807 | 0.217166184 | -0.895930499 | 0.370289884    | 0.462406841 |
| Ankmy2        | 191.8341709 | -0.194744717 | 0.227217848 | -0.857083714 | 0.391398621    | 0.484045244 |
| Tra2b         | 1060.280625 | -0.195035393 | 0.127052863 | -1.535072787 | 0.12476595     | 0.186416648 |
| Heatr6        | 393.9598743 | -0.195386683 | 0.24700871  | -0.791011309 | 0.428937392    | 0.520760907 |
| Efcab14       | 324.1178742 | -0.195477256 | 0.206794181 | -0.945274452 | 0.344518778    | 0.436778175 |
| A630073D07Rik | 1.364620963 | -0.195546974 | 1.629259138 | -0.120022021 | 0.904465704 NA |             |
| Wtap          | 720.9482565 | -0.195647097 | 0.148018462 | -1.321774964 | 0.186243097    | 0.261322825 |
| Ino80c        | 301.3818419 | -0.195843142 | 0.186547605 | -1.049829305 | 0.293796599    | 0.382982446 |
| Mapk8ip3      | 1133.427711 | -0.196107354 | 0.255009877 | -0.769018658 | 0.441882234    | 0.533022594 |
| Eml3          | 604.5799465 | -0.196550576 | 0.147124556 | -1.335946772 | 0.181566672    | 0.255792796 |
| Gm48930       | 3.319361521 | -0.196583826 | 1.346772789 | -0.145966586 | 0.883947766    | 0.914858033 |
| Upf2          | 444.9279181 | -0.196617404 | 0.214047962 | -0.918567046 | 0.358322075    | 0.450808501 |
| Cpb1          | 1.817907363 | -0.196653113 | 1.320445333 | -0.148929386 | 0.881609353    | 0.912936661 |
| Ppm1d         | 140.2254169 | -0.196678709 | 0.22736197  | -0.865046643 | 0.387013188    | 0.47928235  |
| Zc3h7a        | 1358.129901 | -0.196835337 | 0.158385639 | -1.24276     | 0.213956287    | 0.293574675 |
| Tmem265       | 57.83857936 | -0.197117947 | 0.268644638 | -0.733749788 | 0.463101248    | 0.553669813 |
| Nlrp9b        | 5.13219529  | -0.197190929 | 0.905516547 | -0.217766235 | 0.827611254    | 0.871848029 |
| Hexdc         | 408.0310336 | -0.19765478  | 0.209031095 | -0.945575965 | 0.344364908    | 0.43661557  |
| Parva         | 1706.288358 | -0.198022036 | 0.142041891 | -1.394110109 | 0.163284357    | 0.233725585 |
| Ccl24         | 16.97597708 | -0.198215422 | 0.800084447 | -0.247743126 | 0.804333162    | 0.853353578 |
| Cep57l1       | 105.740416  | -0.198256934 | 0.285094211 | -0.695408486 | 0.486799344    | 0.576799227 |
| Vps4b         | 978.131844  | -0.198480639 | 0.215180592 | -0.922390991 | 0.356324667    | 0.448675894 |
| Hps4          | 468.5575407 | -0.198518245 | 0.279677808 | -0.709810502 | 0.477821656    | 0.568170784 |
| Exoc1         | 314.3863656 | -0.198536697 | 0.240382583 | -0.825919643 | 0.408849677    | 0.501299576 |
| Gm9974        | 4.68898822  | -0.198611971 | 0.951534393 | -0.208728105 | 0.834660499    | 0.876959079 |
| Spx           | 4.564608576 | -0.19882515  | 1.032723697 | -0.192525019 | 0.847330972    | 0.886649792 |
| Aspn          | 8.655802614 | -0.198846351 | 0.628441083 | -0.316412082 | 0.751689748    | 0.810367839 |
| Gm43498       | 35.26902486 | -0.198919795 | 0.487483716 | -0.408054235 | 0.683233858    | 0.753949823 |
| Cenpm         | 51.23017292 | -0.198978663 | 0.547253532 | -0.363595027 | 0.716160441    | 0.780733034 |
| Gm6853        | 2.472739465 | -0.199175622 | 1.511808195 | -0.131746621 | 0.895184708    | 0.923125388 |
| Sumo1         | 668.5181473 | -0.199363285 | 0.124843729 | -1.596902675 | 0.110287403    | 0.167963164 |
| Zfyve27       | 540.7263923 | -0.199384401 | 0.215734473 | -0.924212058 | 0.355375919    | 0.447778911 |
| Cherp         | 765.5351334 | -0.199475186 | 0.165219285 | -1.207335975 | 0.227302782    | 0.309139036 |
| Abca14        | 9.879773679 | -0.199842911 | 0.901868096 | -0.221587738 | 0.824634829    | 0.869518466 |



|               |             |              |             |              |             |             |
|---------------|-------------|--------------|-------------|--------------|-------------|-------------|
| Heatr5b       | 278.4920315 | -0.199974571 | 0.193287525 | -1.03459637  | 0.30085745  | 0.390514528 |
| Sec61a1       | 3988.573561 | -0.200147993 | 0.163745508 | -1.222311353 | 0.221589908 | 0.30240672  |
| Glmn          | 80.45739605 | -0.200481574 | 0.329597386 | -0.608262027 | 0.543013702 | 0.629611432 |
| Smad1         | 351.5576034 | -0.200942023 | 0.160084895 | -1.255221634 | 0.209398314 | 0.288149537 |
| Rab40c        | 327.7635352 | -0.201042975 | 0.181876777 | -1.105380128 | 0.268994911 | 0.355325061 |
| Gm7589        | 0.615096582 | -0.201177459 | 2.558450396 | -0.078632542 | 0.937324903 | NA          |
| Entpd6        | 194.0531483 | -0.201838628 | 0.1932142   | -1.04463662  | 0.296190948 | 0.385631837 |
| Puf60         | 1532.298961 | -0.201865474 | 0.165246558 | -1.221601687 | 0.22185829  | 0.302724518 |
| Zdhhc14       | 76.02518982 | -0.20190521  | 0.296434888 | -0.681111494 | 0.495800945 | 0.585712321 |
| Mbd6          | 1359.582366 | -0.2020073   | 0.183528651 | -1.100685363 | 0.271033619 | 0.35760244  |
| Hsp90ab1      | 14268.66938 | -0.202067182 | 0.104038443 | -1.94223573  | 0.052108569 | 0.087461543 |
| 2610008E11Rik | 256.1032419 | -0.20251976  | 0.158127116 | -1.28074024  | 0.200284921 | 0.277598157 |
| Micall1       | 449.5876936 | -0.202568063 | 0.216255233 | -0.936708261 | 0.348908646 | 0.441391703 |
| Scaper        | 101.0712853 | -0.202723661 | 0.23274507  | -0.871011624 | 0.383747806 | 0.475860678 |
| Peli1         | 574.9363169 | -0.202742724 | 0.173436058 | -1.168976782 | 0.242412986 | 0.326150784 |
| Sapcd1        | 8.230775137 | -0.202968207 | 0.73398494  | -0.276529117 | 0.782141699 | 0.83530362  |
| Caprin1       | 3922.455006 | -0.20307738  | 0.21408304  | -0.948591632 | 0.342828349 | 0.435250051 |
| Zmym6         | 271.0014878 | -0.20317879  | 0.179358859 | -1.132805993 | 0.257295734 | 0.34223123  |
| Maf1          | 574.0744292 | -0.203260464 | 0.156294245 | -1.300498712 | 0.193430097 | 0.269587664 |
| Zbtb49        | 83.69583274 | -0.20333182  | 0.228372158 | -0.890358893 | 0.373273208 | 0.465478871 |
| Tipr1         | 342.233671  | -0.203539246 | 0.243208439 | -0.836892202 | 0.402653164 | 0.495626797 |
| Tubgcp6       | 308.8391811 | -0.20370986  | 0.18283567  | -1.114169132 | 0.265206635 | 0.351028161 |
| Ppp1r2        | 825.2106419 | -0.203904503 | 0.180363962 | -1.130516874 | 0.258258492 | 0.343217242 |
| Samd12        | 6.996121035 | -0.203969782 | 0.742719288 | -0.27462567  | 0.783603842 | 0.836272313 |
| Nde1          | 366.9993211 | -0.204154444 | 0.235405867 | -0.867244502 | 0.385808058 | 0.47803298  |
| Tmem127       | 922.7867678 | -0.204189263 | 0.162105293 | -1.259608861 | 0.207810498 | 0.286354888 |
| B4galt1       | 1083.545059 | -0.204242213 | 0.233989104 | -0.872870616 | 0.382733604 | 0.474844806 |
| Guca1a        | 20.64989279 | -0.204347264 | 0.450628055 | -0.45347213  | 0.650208808 | 0.725774881 |
| Btbd19        | 44.86316535 | -0.204366219 | 0.411955878 | -0.49608764  | 0.619832579 | 0.699424531 |
| Gm12941       | 0.529629466 | -0.204689337 | 2.640440326 | -0.07752091  | 0.938209157 | NA          |
| Cgnl1         | 1797.100517 | -0.204817139 | 0.153831608 | -1.331792226 | 0.182928473 | 0.257477263 |
| Nemf          | 638.9229319 | -0.205078505 | 0.214668116 | -0.955328202 | 0.33941175  | 0.431743514 |
| Olfir777      | 0.929837656 | -0.205837527 | 2.739154013 | -0.075146387 | 0.940098241 | NA          |
| Ccdc87        | 1.859442132 | -0.206089829 | 1.465064583 | -0.14066945  | 0.888131081 | 0.917905951 |
| Rtn3          | 2227.08454  | -0.206115753 | 0.134735365 | -1.529782127 | 0.126070667 | 0.187986769 |
| Rpl37a        | 4590.365334 | -0.206286027 | 0.143610518 | -1.436427005 | 0.150880873 | 0.218986645 |
| Washc5        | 542.6833923 | -0.20631703  | 0.143448339 | -1.438267125 | 0.150358276 | 0.218358283 |
| Sf3a1         | 465.741312  | -0.20633575  | 0.221972672 | -0.929554744 | 0.352601668 | 0.445031716 |
| Mfsd2b        | 26.98557344 | -0.206368262 | 0.434941015 | -0.474474134 | 0.635161839 | 0.712926104 |
| Gpatch2l      | 252.0566349 | -0.206494311 | 0.200562002 | -1.02957843  | 0.303207945 | 0.393266056 |
| Haghl         | 172.3275695 | -0.206558429 | 0.241185109 | -0.856431104 | 0.391759366 | 0.484350836 |
| Gm15013       | 0.600955551 | -0.206895905 | 2.884290457 | -0.071731994 | 0.942815194 | NA          |
| Hand2         | 122.4841445 | -0.207149262 | 0.460848327 | -0.449495527 | 0.653074234 | 0.728258081 |
| Ppp1r21       | 544.7059947 | -0.207349628 | 0.208361462 | -0.995143853 | 0.319666305 | 0.411140789 |
| Zfp512        | 424.6886962 | -0.207483338 | 0.206640318 | -1.004079648 | 0.315340224 | 0.406589029 |
| Xrcc6         | 361.2461093 | -0.20754806  | 0.19661776  | -1.055591622 | 0.29115483  | 0.380294786 |
| Sty1k1        | 262.2478012 | -0.207714949 | 0.570952059 | -0.363804536 | 0.716003975 | 0.780662303 |
| Irf5          | 379.5951615 | -0.207793809 | 0.267838067 | -0.775818806 | 0.437855978 | 0.529214372 |
| Atxn7l3b      | 1832.844911 | -0.20788224  | 0.141487438 | -1.469262873 | 0.141761503 | 0.207428555 |
| Adck2         | 188.5778577 | -0.2078997   | 0.255645727 | -0.813233618 | 0.416084128 | 0.508123368 |
| Tssk1         | 2.968464751 | -0.208133876 | 1.09047935  | -0.190864574 | 0.848631696 | 0.887683958 |
| Bloc1s6       | 303.4947142 | -0.208210827 | 0.167871125 | -1.240301612 | 0.214863856 | 0.29461908  |
| Mmp16         | 3.346593244 | -0.208266776 | 1.124499298 | -0.185208453 | 0.853065539 | 0.891228172 |
| Tfap4         | 151.9114718 | -0.208273877 | 0.273074382 | -0.762700167 | 0.445642231 | 0.536722625 |
| Olfir1240     | 4.588082593 | -0.208484404 | 0.898207992 | -0.232111499 | 0.816451414 | 0.862957751 |
| Klf3          | 1117.786149 | -0.208563654 | 0.199566813 | -1.045081851 | 0.295985141 | 0.385481642 |
| Zc3h4         | 809.1660238 | -0.20889881  | 0.173782965 | -1.202067248 | 0.229337475 | 0.311533488 |
| Olfir646      | 2.431765227 | -0.208935684 | 1.148201264 | -0.181967823 | 0.855607978 | 0.892900092 |
| Gm49273       | 38.01662177 | -0.209211678 | 0.696335299 | -0.30044675  | 0.763836408 | 0.820327774 |
| Gm6316        | 0.610685032 | -0.20948865  | 2.954089958 | -0.070914783 | 0.943465577 | NA          |
| Gcc2          | 463.963028  | -0.209518757 | 0.188372407 | -1.112258212 | 0.266027146 | 0.351895622 |
| Frs2          | 519.2948535 | -0.209676021 | 0.145806152 | -1.438046456 | 0.150420873 | 0.218430583 |
| Tradd         | 281.0344931 | -0.210095515 | 0.181693524 | -1.156318126 | 0.247551057 | 0.331572157 |
| Gm14373       | 0.519218967 | -0.210180365 | 3.620746487 | -0.058048904 | 0.953709675 | NA          |
| Snrpf         | 304.7351687 | -0.21036058  | 0.201659231 | -1.043148778 | 0.296879392 | 0.386321646 |
| Taf9          | 46.00907778 | -0.211010043 | 0.589182648 | -0.358140287 | 0.720238331 | 0.784476301 |

|               |             |              |             |              |             |    |             |
|---------------|-------------|--------------|-------------|--------------|-------------|----|-------------|
| Mdn1          | 356.79555   | -0.211612495 | 0.347947745 | -0.608173206 | 0.543072603 |    | 0.629611432 |
| Gm21769       | 0.52163288  | -0.211788156 | 3.072379265 | -0.068932947 | 0.945042993 | NA |             |
| Bivm          | 252.6060274 | -0.21182905  | 0.176805649 | -1.198089831 | 0.230882047 |    | 0.313257234 |
| Ddx10         | 204.0236957 | -0.212048231 | 0.195425972 | -1.085056547 | 0.277896611 |    | 0.365159247 |
| Cul9          | 294.2581312 | -0.212087757 | 0.318860028 | -0.665143756 | 0.505958551 |    | 0.595237138 |
| Acsl4         | 1059.829006 | -0.212112002 | 0.1689983   | -1.255113232 | 0.209437658 |    | 0.288175399 |
| Limd1         | 762.912331  | -0.212121504 | 0.140293942 | -1.511979072 | 0.130539187 |    | 0.193633695 |
| Rps3a1        | 7154.10161  | -0.212323105 | 0.178223348 | -1.191331593 | 0.233523436 |    | 0.316312374 |
| Map3k19       | 0.518478378 | -0.212417385 | 3.620674218 | -0.058667909 | 0.95321662  | NA |             |
| Tigd4         | 0.515119944 | -0.212899551 | 3.003132253 | -0.070892499 | 0.943483313 | NA |             |
| Kcnc2         | 0.51510763  | -0.213064095 | 3.003153254 | -0.070946794 | 0.943440101 | NA |             |
| Mff           | 624.2748628 | -0.213141865 | 0.174018919 | -1.224820072 | 0.220643021 |    | 0.301404024 |
| Pkp2          | 935.3810549 | -0.213246697 | 0.123610381 | -1.725152008 | 0.084500082 |    | 0.133558075 |
| Slc52a2       | 230.6495939 | -0.213255571 | 0.212815249 | -1.002069037 | 0.316310251 |    | 0.40765476  |
| Necab2        | 7.174172516 | -0.213370603 | 0.776857845 | -0.27465849  | 0.783578625 |    | 0.836272313 |
| Poc1b         | 125.3522834 | -0.213408927 | 0.275841612 | -0.773664734 | 0.43912908  |    | 0.530377085 |
| Pafah1b1      | 1509.058319 | -0.213525647 | 0.158080143 | -1.350743    | 0.176777773 |    | 0.250100205 |
| 6430548M08Rik | 80.01517259 | -0.213578133 | 0.359918003 | -0.593407751 | 0.552908303 |    | 0.638270636 |
| Yipf5         | 811.6999031 | -0.213736534 | 0.130136201 | -1.642406439 | 0.100505801 |    | 0.15501881  |
| Ap1b1         | 1121.105069 | -0.213773301 | 0.16610181  | -1.287001635 | 0.198093718 |    | 0.275008283 |
| Rnf114        | 1279.45965  | -0.214030662 | 0.191364974 | -1.118442198 | 0.26337818  |    | 0.348851777 |
| Sh2d3c        | 213.1839268 | -0.214079392 | 0.216317959 | -0.989651496 | 0.322344491 |    | 0.413691735 |
| Ppp2r3d       | 433.1380959 | -0.214182991 | 0.238544985 | -0.897872537 | 0.369253508 |    | 0.46154658  |
| Trim12a       | 231.4027366 | -0.214231208 | 0.233374759 | -0.917970774 | 0.358634167 |    | 0.450984383 |
| Smc3          | 449.6565772 | -0.214237587 | 0.161813371 | -1.323979506 | 0.185509851 |    | 0.260572789 |
| Mta2          | 1352.537898 | -0.214286455 | 0.184232279 | -1.163131983 | 0.244775958 |    | 0.328474538 |
| Slf1          | 79.13508924 | -0.214822139 | 0.271322625 | -0.791759033 | 0.428501194 |    | 0.5203425   |
| Mpig6b        | 1.264495857 | -0.214935631 | 1.875853528 | -0.114580178 | 0.908777892 | NA |             |
| Gtf2h2        | 215.3546354 | -0.215009177 | 0.204786184 | -1.049920324 | 0.293754746 |    | 0.38295717  |
| Zwint         | 1236.022299 | -0.215050377 | 0.166622347 | -1.290645465 | 0.196826643 |    | 0.273471932 |
| Ssh1          | 318.5059842 | -0.215211335 | 0.201171805 | -1.069788757 | 0.284714404 |    | 0.372939774 |
| Trpm3         | 0.936141381 | -0.215328512 | 2.625838287 | -0.082003722 | 0.934643754 | NA |             |
| Pcnx4         | 147.7509771 | -0.215344611 | 0.253534288 | -0.849370761 | 0.395675018 |    | 0.488412693 |
| Eps15         | 1002.415655 | -0.215543956 | 0.153106279 | -1.40780612  | 0.159188488 |    | 0.228784803 |
| Metap2        | 1232.37849  | -0.215674957 | 0.163077726 | -1.322528601 | 0.185992192 |    | 0.261017143 |
| Eef1e1        | 156.5147879 | -0.215708876 | 0.291970638 | -0.738803319 | 0.460026436 |    | 0.550584856 |
| Rpl5          | 709.0162805 | -0.215879937 | 0.280483872 | -0.769669697 | 0.44149585  |    | 0.532669586 |
| Egln1         | 571.0686831 | -0.216427069 | 0.166257712 | -1.301756571 | 0.192999614 |    | 0.269119698 |
| Gm46350       | 1.34088891  | -0.216619441 | 1.630214104 | -0.132877909 | 0.894289938 | NA |             |
| Zfp68         | 367.3531125 | -0.216636012 | 0.235365769 | -0.920422765 | 0.357351877 |    | 0.449703609 |
| Csm2          | 5.595673367 | -0.216833765 | 0.974457291 | -0.222517464 | 0.82391108  |    | 0.868947907 |
| Ccdc66        | 142.5348584 | -0.217383268 | 0.295058345 | -0.736746721 | 0.461276389 |    | 0.551732258 |
| Rbm22         | 522.512113  | -0.21781821  | 0.138633077 | -1.571184993 | 0.116139685 |    | 0.175613178 |
| Uhrf1bp1l     | 1420.707297 | -0.217827759 | 0.193138608 | -1.127831258 | 0.25939119  |    | 0.344400389 |
| Cramp1l       | 462.5436635 | -0.217928495 | 0.145476922 | -1.498027952 | 0.134125988 |    | 0.198075177 |
| Moap1         | 25.61140645 | -0.217931488 | 0.654280266 | -0.333085833 | 0.739069493 |    | 0.800232246 |
| Tatdn3        | 132.8070234 | -0.217991072 | 0.255791937 | -0.852220264 | 0.394091852 |    | 0.486693574 |
| Epc1          | 448.1958985 | -0.218023027 | 0.233282908 | -0.934586373 | 0.350001504 |    | 0.442479082 |
| Ppp4r2        | 917.3643393 | -0.218131147 | 0.136540753 | -1.597555782 | 0.110141874 |    | 0.167756514 |
| Olfr1451      | 0.525618452 | -0.218228983 | 3.067800131 | -0.071135333 | 0.943290048 | NA |             |
| Fam241a       | 76.08595375 | -0.218476585 | 0.293762488 | -0.743718458 | 0.45704682  |    | 0.547749328 |
| Lsm2          | 348.7897366 | -0.218496778 | 0.200369503 | -1.090469232 | 0.275506499 |    | 0.362382131 |
| Spata5        | 85.25411038 | -0.218993678 | 0.405704911 | -0.539785622 | 0.589344884 |    | 0.672275114 |
| Kmt2a         | 853.9251571 | -0.219476306 | 0.163321399 | -1.343830672 | 0.179003149 |    | 0.252828971 |
| Klhl38        | 0.525745906 | -0.219545948 | 3.067738636 | -0.071566054 | 0.942947256 | NA |             |
| Lrrc18        | 6.849801104 | -0.219678615 | 0.862735447 | -0.254630334 | 0.799008628 |    | 0.848956005 |
| Oaz2          | 706.2838843 | -0.220094204 | 0.1644129   | -1.33866749  | 0.180678944 |    | 0.254675767 |
| Lnpk          | 100.2664254 | -0.220339852 | 0.258214846 | -0.853319842 | 0.393481196 |    | 0.486057565 |
| Med11         | 203.6345236 | -0.220437608 | 0.186022261 | -1.185006607 | 0.236014835 |    | 0.318952113 |
| Gsdmd         | 750.2209912 | -0.220646607 | 0.190957837 | -1.155472908 | 0.247896821 |    | 0.331930962 |
| Dkc1          | 252.8918359 | -0.220726846 | 0.173113167 | -1.275043366 | 0.202293789 |    | 0.280086455 |
| Mlst8         | 187.3236886 | -0.221073879 | 0.229571228 | -0.962986003 | 0.335554547 |    | 0.427703471 |
| Plk5          | 45.53720575 | -0.221227245 | 0.386841423 | -0.571880962 | 0.567402623 |    | 0.65164891  |
| Gm48501       | 33.56880075 | -0.221330815 | 0.390659918 | -0.566556241 | 0.571015712 |    | 0.655211564 |
| Pum3          | 592.6344447 | -0.221484684 | 0.14321359  | -1.546533984 | 0.121975659 |    | 0.18285633  |
| Irs3          | 2.731081616 | -0.221545361 | 1.344469921 | -0.164782683 | 0.869115035 |    | 0.903278813 |

|          |             |              |             |              |             |             |
|----------|-------------|--------------|-------------|--------------|-------------|-------------|
| BC005624 | 434.9471794 | -0.222267906 | 0.172993333 | -1.284835097 | 0.198849915 | 0.275878365 |
| C3       | 135400.7949 | -0.222325889 | 0.150066842 | -1.48151241  | 0.138470081 | 0.20338054  |
| Pald     | 1170.702172 | -0.22250488  | 0.224334438 | -0.991844504 | 0.321273384 | 0.412694965 |
| Xrn1     | 386.8146274 | -0.222530835 | 0.165615516 | -1.34365934  | 0.179058571 | 0.2528863   |
| Mrm1     | 72.9152729  | -0.222536649 | 0.383073526 | -0.580924116 | 0.561291598 | 0.646241586 |
| Wnt9a    | 23.38510027 | -0.222539127 | 0.626910744 | -0.35497737  | 0.722606544 | 0.78655321  |
| Gulp1    | 11.36642893 | -0.222729556 | 0.726483953 | -0.306585651 | 0.759158777 | 0.816693307 |
| Rap1gds1 | 504.1285065 | -0.222780567 | 0.195365461 | -1.140327289 | 0.254149973 | 0.339052253 |
| Trim21   | 158.3385107 | -0.222797035 | 0.252785661 | -0.881367376 | 0.378119009 | 0.47014203  |
| Gm11472  | 0.530460558 | -0.222814498 | 3.063421211 | -0.072733876 | 0.942017891 | NA          |
| Gm12184  | 32.94662381 | -0.222992508 | 0.471836126 | -0.472605838 | 0.636494417 | 0.713878738 |
| Ddx11    | 172.9802216 | -0.223051712 | 0.26480433  | -0.842326529 | 0.399605206 | 0.492515149 |
| Pfdn4    | 128.6549637 | -0.223054232 | 0.196578866 | -1.134680633 | 0.256509155 | 0.34142474  |
| Cdk3     | 3.732752888 | -0.223194286 | 0.935520738 | -0.238577593 | 0.811433142 | 0.859051866 |
| Slc26a11 | 185.6152618 | -0.223365172 | 0.23468149  | -0.951780096 | 0.341208518 | 0.433516383 |
| Atp9a    | 1151.905146 | -0.223505686 | 0.192345267 | -1.162002526 | 0.245234439 | 0.328986206 |
| Atmin    | 171.3536199 | -0.224073124 | 0.2042915   | -1.096830382 | 0.272715546 | 0.359404347 |
| Vdac2    | 2166.450262 | -0.224107206 | 0.150395547 | -1.490118627 | 0.136193047 | 0.20058912  |
| Kdm2a    | 1441.346781 | -0.224112865 | 0.177534919 | -1.26235935  | 0.20681951  | 0.285402218 |
| Creb1    | 416.2322486 | -0.224120428 | 0.143911159 | -1.557352674 | 0.119386776 | 0.179622783 |
| Rpl18    | 4658.912631 | -0.224135798 | 0.160329012 | -1.397974045 | 0.162120861 | 0.232294205 |
| Picalm   | 2628.797641 | -0.224616907 | 0.135021534 | -1.663563584 | 0.096199674 | 0.149363574 |
| Tdg      | 500.6960961 | -0.224932036 | 0.19247808  | -1.168611179 | 0.242560322 | 0.326246026 |
| Gm9194   | 1.056926641 | -0.225305842 | 2.009977055 | -0.112093739 | 0.910749082 | NA          |
| Hsp14    | 662.8529335 | -0.225360123 | 0.306654132 | -0.734900005 | 0.462400395 | 0.55293551  |
| Kdm5a    | 752.1086708 | -0.225475328 | 0.185711913 | -1.214113435 | 0.22470441  | 0.306118011 |
| Rogdi    | 493.910003  | -0.22548215  | 0.266779495 | -0.845200454 | 0.397998929 | 0.490819281 |
| Gm6266   | 0.933140537 | -0.225726887 | 2.00262302  | -0.112715616 | 0.910256021 | NA          |
| Pdrg1    | 537.0656384 | -0.225762565 | 0.178062393 | -1.267884596 | 0.204839166 | 0.283058936 |
| Rlim     | 759.1993738 | -0.225788049 | 0.132671154 | -1.701862403 | 0.088781165 | 0.139561208 |
| Rnf26    | 309.9311193 | -0.225941902 | 0.201496905 | -1.121316986 | 0.262152958 | 0.347457059 |
| Tmem181a | 158.2250051 | -0.226287352 | 0.200436112 | -1.12897496  | 0.258908397 | 0.34383971  |
| Hsp90aa1 | 3504.944863 | -0.226292782 | 0.205329144 | -1.102097724 | 0.270419189 | 0.356846995 |
| Akap9    | 850.2835452 | -0.226374314 | 0.278477438 | -0.812900017 | 0.416275385 | 0.508284111 |
| Efn3     | 1.115268194 | -0.226438219 | 1.793055083 | -0.126286259 | 0.899505333 | NA          |
| Ar13     | 307.0263148 | -0.226452554 | 0.161935914 | -1.398408471 | 0.161990441 | 0.232146355 |
| Utp20    | 398.5888652 | -0.22654292  | 0.198569025 | -1.140877438 | 0.25392093  | 0.338775516 |
| Cpsf2    | 454.5868963 | -0.226559474 | 0.15279418  | -1.482775547 | 0.138134055 | 0.202956939 |
| Gm6211   | 21.92281534 | -0.226652017 | 0.411560582 | -0.550713618 | 0.581830008 | 0.665216148 |
| Gm49336  | 425.8146875 | -0.227020379 | 0.180837482 | -1.255383433 | 0.209339601 | 0.288126569 |
| Ttll1    | 72.47298928 | -0.227321431 | 0.27634011  | -0.822614678 | 0.410727149 | 0.502986598 |
| Ric1     | 474.4732206 | -0.227768851 | 0.200650229 | -1.135153704 | 0.256310923 | 0.341215863 |
| Rdh12    | 14.04002596 | -0.228084575 | 0.546972776 | -0.416994382 | 0.676682517 | 0.748124744 |
| Chic2    | 352.2543891 | -0.228141264 | 0.206845732 | -1.102953693 | 0.270047275 | 0.356438986 |
| Dusp14   | 16.8476434  | -0.228354973 | 0.638963289 | -0.357383557 | 0.720804685 | 0.7849785   |
| Atp6v1c1 | 685.9849037 | -0.228366455 | 0.156955819 | -1.454972851 | 0.145676778 | 0.212500873 |
| Pdcf7    | 128.5593306 | -0.228491806 | 0.189600983 | -1.205119306 | 0.228157248 | 0.310177413 |
| Gm21596  | 12.10420625 | -0.228524635 | 0.583215775 | -0.391835484 | 0.695179775 | 0.764164343 |
| Zfand2a  | 187.4180346 | -0.228539414 | 0.26671982  | -0.856852008 | 0.391526679 | 0.484133373 |
| Zfx      | 368.8040603 | -0.228567887 | 0.209205548 | -1.092551746 | 0.274590659 | 0.361400568 |
| Polm     | 174.1980855 | -0.22871195  | 0.320849939 | -0.712831522 | 0.475950017 | 0.566738555 |
| Nup153   | 614.7859739 | -0.228858209 | 0.254302518 | -0.899944724 | 0.368149668 | 0.460504479 |
| Arpin    | 149.5088665 | -0.228886778 | 0.236989272 | -0.965810712 | 0.334138907 | 0.42621774  |
| Thoc6    | 123.7924576 | -0.229466293 | 0.255013228 | -0.899821135 | 0.368215445 | 0.460552964 |
| Rpl7     | 7590.122372 | -0.229854118 | 0.149550925 | -1.536962196 | 0.124302567 | 0.185870552 |
| Gm4332   | 881.1308544 | -0.23008967  | 0.21632897  | -1.063610067 | 0.28750538  | 0.376190937 |
| Lmnb2    | 211.0681275 | -0.230203335 | 0.203590692 | -1.130716404 | 0.258174475 | 0.343212605 |
| Sap30bp  | 417.1445304 | -0.230675609 | 0.247345909 | -0.932603295 | 0.351024831 | 0.443345038 |
| Rad50    | 235.9305208 | -0.230764318 | 0.156659805 | -1.473028247 | 0.140743419 | 0.206133489 |
| Erg      | 7.852184128 | -0.230892375 | 1.564832709 | -0.147550836 | 0.882697257 | 0.913730211 |
| Trappc10 | 518.0981811 | -0.230993925 | 0.158648667 | -1.456009236 | 0.145390066 | 0.212100792 |
| Cltc     | 3520.981649 | -0.231190461 | 0.108090447 | -2.138861189 | 0.032446912 | 0.05770446  |
| Lsm11    | 85.65575739 | -0.231247266 | 0.29545531  | -0.782681029 | 0.433814445 | 0.525148666 |
| Armcx3   | 220.5565417 | -0.231283137 | 0.216125962 | -1.070131211 | 0.284560252 | 0.372766496 |
| Nr2c2ap  | 213.7952179 | -0.231926039 | 0.166581285 | -1.39226948  | 0.16384081  | 0.234364669 |
| Cep63    | 261.6972408 | -0.23208738  | 0.220310723 | -1.053454765 | 0.292132616 | 0.381367397 |

|           |             |              |             |              |             |             |
|-----------|-------------|--------------|-------------|--------------|-------------|-------------|
| Erlin2    | 751.5236994 | -0.232313801 | 0.126123848 | -1.841949835 | 0.065482488 | 0.106674196 |
| Gm13092   | 81.03372019 | -0.232581273 | 0.321375336 | -0.723706045 | 0.469246221 | 0.559733388 |
| Snw1      | 635.7693933 | -0.232690281 | 0.169910358 | -1.369488498 | 0.170846628 | 0.242959068 |
| Rps6ka2   | 110.1772389 | -0.233066302 | 0.219304389 | -1.062752568 | 0.287894175 | 0.376612944 |
| Med9      | 175.9918518 | -0.233515369 | 0.174931002 | -1.334899855 | 0.181909125 | 0.256195624 |
| Nxnl2     | 3.080508888 | -0.233528758 | 1.105971949 | -0.211152514 | 0.832768264 | 0.875441411 |
| Serpina3f | 32.1512456  | -0.233570659 | 0.463854361 | -0.503543091 | 0.614582492 | 0.694972295 |
| Tnfrsf22  | 77.55686309 | -0.233653804 | 0.256678673 | -0.910296914 | 0.362665946 | 0.455114394 |
| Kctd20    | 802.4126269 | -0.233888631 | 0.166973154 | -1.4007559   | 0.16128708  | 0.231391243 |
| Tnfrsf1b  | 532.2964373 | -0.233916583 | 0.203721514 | -1.14821738  | 0.250878836 | 0.335344394 |
| Tango6    | 108.4763615 | -0.233998704 | 0.238765724 | -0.98003474  | 0.327068971 | 0.418703297 |
| Plscr4    | 65.93299438 | -0.234728006 | 0.340482345 | -0.689398465 | 0.490572549 | 0.580501202 |
| Ambra1    | 596.0171632 | -0.234920746 | 0.151347526 | -1.552194162 | 0.120615773 | 0.181120205 |
| Spdef     | 1.916842472 | -0.235473821 | 1.4127554   | -0.166676992 | 0.86762421  | 0.902456225 |
| Arl2      | 140.6171881 | -0.235620981 | 0.255434759 | -0.922431159 | 0.356303723 | 0.448675894 |
| Phf5a     | 538.0522291 | -0.235642234 | 0.190982771 | -1.233840275 | 0.217262428 | 0.297596809 |
| Cd22      | 62.30168978 | -0.235719987 | 0.555587816 | -0.424271339 | 0.671367939 | 0.743692291 |
| Gm3226    | 4.481328178 | -0.23585535  | 1.003865022 | -0.234947273 | 0.814249658 | 0.861206829 |
| Zfp35     | 203.9615243 | -0.23601714  | 0.163722218 | -1.441570625 | 0.14942354  | 0.217130286 |
| Kdm7a     | 396.3965616 | -0.236059064 | 0.165096013 | -1.429828976 | 0.152766111 | 0.221195571 |
| Tmem30c   | 3.773806891 | -0.236368947 | 0.982840299 | -0.240495782 | 0.809945933 | 0.857850289 |
| Hspa5     | 15266.34891 | -0.236473365 | 0.264959792 | -0.892487737 | 0.372131563 | 0.46436092  |
| Coro1b    | 1608.045144 | -0.237271143 | 0.131162201 | -1.80899025  | 0.070452518 | 0.113781093 |
| Gm5767    | 1.450197733 | -0.237537473 | 1.553742912 | -0.152880809 | 0.878492271 | NA          |
| Steap3    | 597.1813014 | -0.238351727 | 0.174114136 | -1.368939547 | 0.171018173 | 0.243081358 |
| Hps5      | 504.5416534 | -0.238791084 | 0.157876464 | -1.512518578 | 0.13040199  | 0.193464472 |
| Psip1     | 502.4348121 | -0.239008362 | 0.250195702 | -0.955285643 | 0.339433266 | 0.431743514 |
| Appl1     | 397.0228511 | -0.239021561 | 0.165256433 | -1.446367665 | 0.148074106 | 0.215426469 |
| Gm14305   | 101.0029214 | -0.239279857 | 0.294953345 | -0.81124646  | 0.41722415  | 0.50896868  |
| Mybbp1a   | 1517.833196 | -0.239682067 | 0.148218059 | -1.617090848 | 0.105858672 | 0.161912672 |
| Ppp1r12b  | 264.0248391 | -0.239685544 | 0.169886044 | -1.410860704 | 0.158285691 | 0.227756116 |
| Ogn       | 42.80114896 | -0.239757517 | 0.366866232 | -0.653528442 | 0.51341566  | 0.60237909  |
| Umps      | 539.4544846 | -0.240117226 | 0.162315684 | -1.479322394 | 0.13905417  | 0.203974832 |
| Rtel1     | 334.654736  | -0.240138979 | 0.197232281 | -1.217543994 | 0.223397309 | 0.304586005 |
| Crbn      | 301.0986093 | -0.240177667 | 0.180461629 | -1.330907119 | 0.183219574 | 0.257780581 |
| Pigx      | 249.3138429 | -0.240320826 | 0.226631328 | -1.060404265 | 0.288960723 | 0.377834208 |
| Fam98b    | 323.6856085 | -0.240423211 | 0.166390143 | -1.444936617 | 0.14847569  | 0.215881754 |
| Ddx17     | 6669.216339 | -0.240447107 | 0.123921326 | -1.940320641 | 0.052340734 | 0.087807994 |
| Golga2    | 928.9052954 | -0.240573153 | 0.199781969 | -1.204178506 | 0.228520592 | 0.310547553 |
| Numa1     | 1515.464102 | -0.240753191 | 0.157977947 | -1.523967078 | 0.127516935 | 0.189832071 |
| G6pc3     | 218.684866  | -0.240930422 | 0.191424967 | -1.258615455 | 0.208169262 | 0.286754168 |
| Fto       | 684.5878222 | -0.240955527 | 0.171474227 | -1.405199664 | 0.159961914 | 0.229780141 |
| Polr3d    | 208.251763  | -0.241288605 | 0.237308207 | -1.016773113 | 0.309261375 | 0.39990048  |
| Itgb1     | 3468.985675 | -0.241347468 | 0.16790575  | -1.437398466 | 0.150604805 | 0.21860833  |
| H2az2     | 676.8473811 | -0.241562269 | 0.249576072 | -0.96789034  | 0.333099139 | 0.425241435 |
| Slc1a3    | 7.075284016 | -0.241564066 | 1.09807068  | -0.219989542 | 0.8258793   | 0.870507623 |
| Dnajc14   | 727.4041469 | -0.241620444 | 0.188416082 | -1.282376967 | 0.19971044  | 0.276914484 |
| Irf9      | 712.979675  | -0.242190295 | 0.197388021 | -1.226975646 | 0.219831745 | 0.300560717 |
| Leprot11  | 374.9139469 | -0.242194184 | 0.169061872 | -1.432577204 | 0.1519787   | 0.220336158 |
| Man2b1    | 2154.165543 | -0.242414894 | 0.161869646 | -1.497593273 | 0.134238956 | 0.198207666 |
| Irs1      | 541.8772856 | -0.242629655 | 0.252918003 | -0.959321411 | 0.337396852 | 0.429666209 |
| Tap2      | 521.3327528 | -0.242644041 | 0.211643277 | -1.146476488 | 0.25159805  | 0.336173961 |
| Anxa6     | 2578.917025 | -0.242676834 | 0.124871323 | -1.94341525  | 0.051966006 | 0.087291011 |
| Dctn4     | 592.5015317 | -0.243027637 | 0.136458565 | -1.78096287  | 0.074918517 | 0.120061184 |
| Cwc22     | 321.469632  | -0.243255682 | 0.187813027 | -1.295201333 | 0.195250785 | 0.271803191 |
| Helz      | 369.9309438 | -0.243487635 | 0.265835219 | -0.91593445  | 0.359701276 | 0.451992877 |
| Rbm34     | 209.8425527 | -0.243809833 | 0.178067496 | -1.36919898  | 0.170937085 | 0.243041517 |
| Inip      | 104.483289  | -0.244205316 | 0.220013039 | -1.109958378 | 0.267016963 | 0.353122735 |
| Mcm8      | 52.18640402 | -0.244228635 | 0.344100086 | -0.70976046  | 0.477852693 | 0.568170784 |
| Pcdhga12  | 7.727306655 | -0.244248108 | 0.71824622  | -0.340061807 | 0.733809983 | 0.795902315 |
| Smarcb1   | 519.8130349 | -0.244438668 | 0.134040906 | -1.823612468 | 0.06821068  | 0.110662793 |
| Lrp6      | 1588.526173 | -0.244772757 | 0.130284567 | -1.878754812 | 0.06027798  | 0.099248503 |
| Tyms      | 226.9364343 | -0.245739697 | 0.344830131 | -0.712639863 | 0.476068638 | 0.566840211 |
| Sbf2      | 717.5589959 | -0.245937825 | 0.124001922 | -1.983338814 | 0.047329597 | 0.080510373 |
| Kmt5c     | 522.4138727 | -0.245982048 | 0.245679877 | -1.001229939 | 0.316715656 | 0.408115533 |
| Olfrc48   | 13.19370481 | -0.246177962 | 0.59951223  | -0.410630426 | 0.68134355  | 0.752253406 |

|           |             |              |             |              |             |             |
|-----------|-------------|--------------|-------------|--------------|-------------|-------------|
| Txk       | 18.24801527 | -0.246224105 | 0.516965127 | -0.476287648 | 0.633869464 | 0.711965122 |
| Lzts3     | 695.5342529 | -0.246352575 | 0.197430921 | -1.247791246 | 0.212107515 | 0.291308219 |
| Ly6m      | 8.354967045 | -0.246625538 | 0.884414942 | -0.278857272 | 0.78035436  | 0.833812669 |
| Naga      | 832.2584513 | -0.24684535  | 0.227327664 | -1.085857064 | 0.277542235 | 0.364750233 |
| Col20a1   | 81.30676009 | -0.24686005  | 0.401218063 | -0.615276509 | 0.538372128 | 0.625599348 |
| Rpl37     | 3018.660722 | -0.247058173 | 0.127197203 | -1.94232394  | 0.052097897 | 0.087452239 |
| Otub2     | 37.4533896  | -0.247225536 | 0.365145127 | -0.67706103  | 0.498367233 | 0.587888499 |
| Cln3      | 307.2246256 | -0.247362735 | 0.199824535 | -1.237899715 | 0.215753248 | 0.295672136 |
| Mta3      | 400.7730069 | -0.247486831 | 0.216744432 | -1.141837088 | 0.253521743 | 0.338345673 |
| Snapc1    | 234.4248859 | -0.247575871 | 0.258333997 | -0.95835575  | 0.3378834   | 0.430060938 |
| Dhx15     | 1097.211651 | -0.247585169 | 0.140693378 | -1.759749983 | 0.078450207 | 0.125144487 |
| Hnrnp11   | 537.5571092 | -0.247958259 | 0.165773272 | -1.495767417 | 0.134714275 | 0.198806177 |
| S100a2    | 1.990367141 | -0.248582642 | 1.733072944 | -0.14343461  | 0.885946951 | 0.91640555  |
| Il5ra     | 1.34663041  | -0.24872539  | 1.779979548 | -0.13973497  | 0.888869395 | NA          |
| Cenpl     | 132.5502551 | -0.248726889 | 0.357707401 | -0.695336157 | 0.48684466  | 0.576799227 |
| Foxn1     | 0.621591773 | -0.248750288 | 2.947317465 | -0.084398878 | 0.932739299 | NA          |
| Gm49037   | 4.650474353 | -0.248900556 | 1.617341041 | -0.153894911 | 0.877692597 | 0.910007522 |
| Fam168a   | 573.9404151 | -0.249072479 | 0.201748818 | -1.234567227 | 0.216991612 | 0.297297517 |
| Fbxo42    | 269.2297715 | -0.249330136 | 0.190533211 | -1.308591476 | 0.19067277  | 0.266507287 |
| Gm16459   | 0.536183076 | -0.249339759 | 3.058331477 | -0.081528036 | 0.93502203  | NA          |
| Rpl38     | 3020.556182 | -0.249525851 | 0.123813866 | -2.015330426 | 0.043870039 | 0.075278956 |
| Zkscan2   | 6.570134467 | -0.250092225 | 0.710610181 | -0.35194011  | 0.724883177 | 0.788578164 |
| Yju2      | 82.59643331 | -0.250137485 | 0.238236397 | -1.049954954 | 0.293738824 | 0.38295717  |
| Zfp646    | 403.7112982 | -0.250205435 | 0.206960067 | -1.208955132 | 0.226680083 | 0.308408389 |
| H3c3      | 2.397177693 | -0.250476181 | 1.319999351 | -0.189754776 | 0.849501295 | 0.888484545 |
| Rpl21     | 6233.744914 | -0.25089493  | 0.133904181 | -1.873690033 | 0.06097316  | 0.10019958  |
| Ccdc85c   | 283.1099581 | -0.250964133 | 0.271053338 | -0.925884678 | 0.354505915 | 0.446946963 |
| Senp7     | 201.7269273 | -0.251424894 | 0.276537321 | -0.909189738 | 0.36324998  | 0.455679592 |
| Ddx31     | 134.5808263 | -0.252067246 | 0.27164685  | -0.927922578 | 0.353447732 | 0.445876641 |
| Ggct      | 210.0945355 | -0.252354547 | 0.225679262 | -1.118199983 | 0.263481591 | 0.348961635 |
| Eif3f     | 1767.734077 | -0.252374525 | 0.162023323 | -1.557643179 | 0.119317857 | 0.179534936 |
| Zbtb25    | 67.15409911 | -0.252570397 | 0.293547621 | -0.860406894 | 0.389564787 | 0.48195214  |
| Smurf2    | 890.0694147 | -0.252939868 | 0.183399715 | -1.379172633 | 0.167841534 | 0.239204353 |
| Mc1r      | 2.045504737 | -0.253010828 | 1.340105149 | -0.188799236 | 0.850250171 | 0.889158687 |
| Bad       | 304.5486563 | -0.253084313 | 0.234617746 | -1.078709166 | 0.280717398 | 0.368326807 |
| Olf1r1087 | 0.535642125 | -0.253522417 | 3.059627555 | -0.082860548 | 0.933962424 | NA          |
| Atp2c2    | 1.023260754 | -0.253925026 | 2.082701962 | -0.121920962 | 0.902961615 | NA          |
| Rgl2      | 677.652793  | -0.254020656 | 0.231993576 | -1.094946943 | 0.273539882 | 0.360240085 |
| Tmem168   | 423.5037237 | -0.254154494 | 0.221319483 | -1.148360237 | 0.250819881 | 0.335291879 |
| Rps12     | 422.4449624 | -0.254391829 | 0.166329725 | -1.529442972 | 0.126154666 | 0.188062675 |
| Cpne1     | 593.5088293 | -0.254460048 | 0.168330115 | -1.511672753 | 0.130617133 | 0.19373246  |
| Osbp      | 1268.73861  | -0.255201065 | 0.165782238 | -1.539375191 | 0.123712727 | 0.185099746 |
| Tpst2     | 722.5205604 | -0.255268781 | 0.186278441 | -1.370361376 | 0.170574123 | 0.242591778 |
| P4ha2     | 139.3512796 | -0.2555735   | 0.326084327 | -0.783765053 | 0.433177984 | 0.524452685 |
| P2ry1     | 122.4708972 | -0.25561443  | 0.250386967 | -1.020877539 | 0.307312462 | 0.397772595 |
| Pgm5      | 14.48174946 | -0.255678001 | 0.849483429 | -0.300980563 | 0.763429316 | 0.819993887 |
| Mapk14    | 1390.451119 | -0.25583925  | 0.169148023 | -1.512516934 | 0.130402408 | 0.193464472 |
| Klhdc10   | 1225.533099 | -0.256188304 | 0.169765666 | -1.509070181 | 0.131280849 | 0.194530718 |
| Gpr150    | 0.930756764 | -0.256306885 | 1.995606651 | -0.128435574 | 0.89780428  | NA          |
| Nln       | 601.6198751 | -0.256524238 | 0.177511172 | -1.445116023 | 0.148425299 | 0.215826894 |
| Pot1b     | 131.1200659 | -0.2566501   | 0.203582371 | -1.260669566 | 0.207427923 | 0.28607571  |
| Gm4118    | 6.842529451 | -0.256743823 | 0.77460726  | -0.331450318 | 0.740304362 | 0.801365723 |
| Nfe2l2    | 1684.143094 | -0.257486912 | 0.186906236 | -1.377626115 | 0.168318754 | 0.23978425  |
| Kras      | 630.216999  | -0.258033636 | 0.19992051  | -1.290681158 | 0.196814261 | 0.273471932 |
| Pop7      | 96.41865064 | -0.258037875 | 0.266346955 | -0.968803545 | 0.332643217 | 0.424818456 |
| Pelp1     | 304.3060182 | -0.258041945 | 0.165275686 | -1.56128195  | 0.11845724  | 0.178444732 |
| Stx12     | 411.5480623 | -0.258414288 | 0.183395952 | -1.409051209 | 0.158820027 | 0.228351506 |
| Nicn1     | 247.0425461 | -0.25906965  | 0.223773836 | -1.157729854 | 0.246974297 | 0.330981669 |
| Sreb2     | 1513.156586 | -0.259091826 | 0.208457071 | -1.242902552 | 0.213903745 | 0.293538682 |
| Kdf1      | 137.3486032 | -0.2591291   | 0.270106551 | -0.959358814 | 0.337378016 | 0.429666209 |
| Ccndbp1   | 409.3695949 | -0.259272273 | 0.153328355 | -1.690961028 | 0.090844246 | 0.142376261 |
| Gstt4     | 1.357119615 | -0.259348029 | 1.815706228 | -0.142835898 | 0.886419785 | NA          |
| Anks3     | 456.9072376 | -0.259375744 | 0.230714073 | -1.124230265 | 0.260915353 | 0.34615447  |
| Tspyl4    | 54.35291006 | -0.259691827 | 0.516909895 | -0.502392833 | 0.615391219 | 0.695794503 |
| Sipa1l1   | 619.7164216 | -0.259902796 | 0.170797689 | -1.521699727 | 0.128084336 | 0.190506174 |
| Utrn      | 727.2867182 | -0.259920118 | 0.220608222 | -1.178197783 | 0.238717766 | 0.322050982 |



|               |             |              |             |              |             |             |
|---------------|-------------|--------------|-------------|--------------|-------------|-------------|
| Ilf2          | 497.794154  | -0.260121041 | 0.146528132 | -1.775229355 | 0.075860025 | 0.121376039 |
| Phf23         | 485.9270172 | -0.260135525 | 0.15659194  | -1.661231891 | 0.096666883 | 0.150020666 |
| Stam          | 384.2182607 | -0.26025905  | 0.168040491 | -1.548787726 | 0.121432757 | 0.182186539 |
| Trdmt1        | 111.4919944 | -0.260869164 | 0.271458012 | -0.960992687 | 0.336555845 | 0.428723309 |
| Fan1          | 84.29116393 | -0.260913815 | 0.231795832 | -1.125619099 | 0.26032678  | 0.345452597 |
| Rnd2          | 240.4173082 | -0.261041352 | 0.391362502 | -0.667006549 | 0.50476795  | 0.593959753 |
| Gbp5          | 93.87188922 | -0.261253591 | 0.331726169 | -0.787557979 | 0.430955302 | 0.522392349 |
| Cenpo         | 86.68289191 | -0.261317296 | 0.271448341 | -0.962677817 | 0.335709232 | 0.427868645 |
| Ruvbl2        | 296.4304969 | -0.261470446 | 0.174987436 | -1.494224116 | 0.135117051 | 0.199193661 |
| Fryl          | 457.5917062 | -0.261591331 | 0.203537338 | -1.285225279 | 0.198713573 | 0.275711645 |
| Tmem38b       | 1404.007881 | -0.261658028 | 0.176689075 | -1.48089534  | 0.138634465 | 0.203586903 |
| Ubr7          | 351.1572198 | -0.26229867  | 0.15511969  | -1.69094375  | 0.090847546 | 0.142376261 |
| Ptprf         | 2454.30753  | -0.262374835 | 0.206861393 | -1.268360577 | 0.204669213 | 0.282869943 |
| Ofap112       | 29.3606912  | -0.262470359 | 0.49918431  | -0.525798495 | 0.59902822  | 0.681360628 |
| Olfra49       | 3.047003062 | -0.262771932 | 1.059138998 | -0.248099572 | 0.804057367 | 0.853309885 |
| Svbp          | 153.0990228 | -0.262831164 | 0.209614738 | -1.25387731  | 0.209886603 | 0.288723216 |
| Ube2g2        | 555.8366513 | -0.262859326 | 0.22738719  | -1.155998831 | 0.247681635 | 0.331694935 |
| Msh5          | 48.93867374 | -0.262953561 | 0.49109468  | -0.535443717 | 0.592343067 | 0.675107943 |
| Nsmc2         | 237.1285456 | -0.263074817 | 0.160287136 | -1.641272181 | 0.100740928 | 0.155353355 |
| Xndc1         | 164.7571827 | -0.263120258 | 0.237363302 | -1.108512797 | 0.267640416 | 0.353837441 |
| Mx2           | 163.3357665 | -0.263691331 | 0.346220636 | -0.761628001 | 0.446282058 | 0.537417286 |
| Heatr9        | 1.367021028 | -0.263810693 | 2.004093959 | -0.13163589  | 0.895272296 | NA          |
| H2ac7         | 2.788298926 | -0.263876624 | 1.960405586 | -0.134603077 | 0.892925709 | 0.921468364 |
| Sprr2a2       | 7.638817335 | -0.263959632 | 1.236940856 | -0.213397133 | 0.831017217 | 0.874135847 |
| Gm9818        | 1.099744279 | -0.264621042 | 1.952667553 | -0.135517714 | 0.892202256 | NA          |
| Hmg20b        | 818.3988772 | -0.264728424 | 0.141895027 | -1.865663852 | 0.06208841  | 0.101793072 |
| Map3k20       | 372.7409446 | -0.264756322 | 0.225564211 | -1.173751459 | 0.240494592 | 0.323902023 |
| Hdac1         | 571.6635975 | -0.264939196 | 0.161010995 | -1.645472694 | 0.099872369 | 0.154209234 |
| Gm20257       | 63.59503222 | -0.26524393  | 0.429992385 | -0.616857274 | 0.537328871 | 0.624514766 |
| Card19        | 198.6993043 | -0.265291585 | 0.225091035 | -1.178596851 | 0.238558746 | 0.321930619 |
| Rps24         | 6963.365923 | -0.265341913 | 0.123818539 | -2.142990183 | 0.032113887 | 0.057231606 |
| Ly6g5b        | 11.01767525 | -0.265393105 | 0.620074987 | -0.428001629 | 0.668649934 | 0.741359526 |
| Gm9843        | 3898.838069 | -0.265425067 | 0.157469544 | -1.685564456 | 0.09187972  | 0.143716439 |
| B9d2          | 107.5921776 | -0.265536896 | 0.25556467  | -1.039020361 | 0.298795267 | 0.388310848 |
| Ift88         | 154.0995087 | -0.265811282 | 0.331544232 | -0.801737011 | 0.422705101 | 0.514545909 |
| Ccdc137       | 280.5770242 | -0.265983862 | 0.249938551 | -1.064197023 | 0.287239455 | 0.375900686 |
| Gm13493       | 0.50737398  | -0.266000486 | 3.014360224 | -0.088244426 | 0.929682409 | NA          |
| Hapln4        | 115.3541428 | -0.266127692 | 0.516637053 | -0.51511538  | 0.606472396 | 0.687818966 |
| Tmem108       | 8.922377559 | -0.266924685 | 0.652264923 | -0.40922741  | 0.682372781 | 0.753194637 |
| Pkp1          | 2.45807703  | -0.267186903 | 1.624088913 | -0.164514948 | 0.86932578  | 0.903399323 |
| Kans12        | 857.838402  | -0.267619557 | 0.137523047 | -1.945997871 | 0.051654995 | 0.086827001 |
| Wdfy3         | 922.8830452 | -0.267633233 | 0.157901023 | -1.694942999 | 0.090086235 | 0.1413911   |
| H2-Ob         | 26.58423009 | -0.267780253 | 0.468744698 | -0.571271002 | 0.567815955 | 0.651992079 |
| Cdk2ap1       | 725.463813  | -0.26788704  | 0.179265343 | -1.49436046  | 0.13508143  | 0.199158369 |
| Acvr2b        | 72.22934466 | -0.268004488 | 0.378521808 | -0.708029185 | 0.478927133 | 0.569170427 |
| Abcd1         | 446.5528124 | -0.268229231 | 0.180798564 | -1.48358054  | 0.137920235 | 0.202660245 |
| Cage1         | 19.19366955 | -0.268257875 | 0.466149788 | -0.575475699 | 0.564969621 | 0.649336082 |
| Rps18         | 7952.602442 | -0.268453409 | 0.115431947 | -2.325642218 | 0.020037645 | 0.037642069 |
| Zbtb7c        | 64.68779578 | -0.26858053  | 0.605394644 | -0.443645369 | 0.657298999 | 0.732107235 |
| Ubxn2b        | 113.520562  | -0.268580605 | 0.276593519 | -0.97103     | 0.331533339 | 0.423750215 |
| Pheta1        | 222.8109327 | -0.268757727 | 0.325752722 | -0.825036014 | 0.409351144 | 0.501806163 |
| Ift80         | 163.4993696 | -0.268769296 | 0.314198755 | -0.855411713 | 0.392323261 | 0.484834822 |
| Erich6        | 0.937882888 | -0.268810013 | 2.268760412 | -0.118483209 | 0.905684799 | NA          |
| Supt5         | 1638.067167 | -0.268947383 | 0.153139827 | -1.756221017 | 0.079050677 | 0.125949154 |
| 4930519P11Rik | 1.102250305 | -0.269052794 | 1.748779902 | -0.153851719 | 0.877726653 | NA          |
| Ino80d        | 658.7521222 | -0.269112437 | 0.159213632 | -1.690260025 | 0.090978219 | 0.14248936  |
| Dnah7c        | 0.055452777 | -0.269190949 | 3.618079047 | -0.074401622 | 0.940690818 | NA          |
| Zfp281        | 427.8645075 | -0.269345141 | 0.218657614 | -1.231812315 | 0.218019202 | 0.298465539 |
| Eef1g         | 4064.212092 | -0.269434535 | 0.199585611 | -1.349969735 | 0.177025691 | 0.250392879 |
| Usp54         | 136.7898799 | -0.269624584 | 0.191411003 | -1.408615912 | 0.158948771 | 0.228498073 |
| Hsf5          | 2.072399938 | -0.270011796 | 1.366804832 | -0.197549636 | 0.843397443 | 0.883509869 |
| Cct7          | 2076.778643 | -0.270537588 | 0.141778842 | -1.908166152 | 0.056369745 | 0.093563568 |
| Arid3b        | 114.1186426 | -0.270546814 | 0.305990417 | -0.884167604 | 0.376605744 | 0.468615449 |
| Tmem47        | 64.7593105  | -0.270719644 | 0.328317519 | -0.824566552 | 0.409617718 | 0.501920288 |
| Hif1a         | 688.5559067 | -0.270759155 | 0.191283465 | -1.415486463 | 0.156925915 | 0.226296142 |
| Olfra286      | 0.587339042 | -0.270835747 | 2.898884207 | -0.093427584 | 0.925563878 | NA          |

|               |             |              |             |              |             |             |
|---------------|-------------|--------------|-------------|--------------|-------------|-------------|
| Gga1          | 881.2203567 | -0.270916905 | 0.140609247 | -1.926736048 | 0.054012533 | 0.090186647 |
| Rbm3          | 691.0955393 | -0.270941194 | 0.238480505 | -1.136114648 | 0.255908585 | 0.340811621 |
| Arid1a        | 1020.821622 | -0.271186588 | 0.120152792 | -2.257014446 | 0.024007172 | 0.044217186 |
| Hoxb4         | 36.93604327 | -0.27129725  | 0.472200278 | -0.574538524 | 0.565603439 | 0.649757913 |
| Virma         | 420.6276425 | -0.271508936 | 0.181612048 | -1.494994075 | 0.134915988 | 0.199000499 |
| Msantd4       | 403.7306071 | -0.272078971 | 0.177953115 | -1.528936265 | 0.126280245 | 0.188233419 |
| Nkain3        | 3.38323474  | -0.272111369 | 0.96510603  | -0.281949714 | 0.777982069 | 0.832092153 |
| Lrrc4         | 1.089032952 | -0.272124635 | 2.23343546  | -0.12184128  | 0.903024721 | NA          |
| Snrnp40       | 208.4440982 | -0.272155187 | 0.213710088 | -1.273478427 | 0.202848323 | 0.280740235 |
| Fbxo28        | 268.0591114 | -0.272354504 | 0.206603002 | -1.318250466 | 0.187419817 | 0.262714442 |
| Acot4         | 770.2128101 | -0.272855493 | 0.382392903 | -0.713547482 | 0.475507042 | 0.566369319 |
| Ubp1          | 1.861435436 | -0.272866661 | 1.479730309 | -0.184402968 | 0.853697342 | 0.891728143 |
| Slc39a7       | 1931.709594 | -0.273055349 | 0.132603179 | -2.05919158  | 0.03947589  | 0.068615922 |
| Cdk17         | 497.9407763 | -0.27312413  | 0.187392767 | -1.45749558  | 0.144979631 | 0.211556342 |
| Cdan1         | 263.2335215 | -0.273193713 | 0.304142481 | -0.898242532 | 0.369056263 | 0.461367689 |
| Gm18859       | 0.630853408 | -0.273373564 | 2.942465673 | -0.092906288 | 0.92597801  | NA          |
| Rhbdd1        | 452.4048908 | -0.273384154 | 0.233604668 | -1.170285492 | 0.241886098 | 0.325570362 |
| Nolc1         | 596.9337484 | -0.273921627 | 0.271598589 | -1.008553201 | 0.313188961 | 0.404304514 |
| Slc30a7       | 479.642456  | -0.274046564 | 0.223664594 | -1.2252568   | 0.22047848  | 0.30122753  |
| Gm5523        | 0.632742212 | -0.274417309 | 2.941435236 | -0.093293677 | 0.925670255 | NA          |
| Sf3b4         | 485.404258  | -0.274530764 | 0.167616755 | -1.63784798  | 0.10145341  | 0.156240084 |
| Hacd1         | 234.1893945 | -0.275174188 | 0.181734523 | -1.514154732 | 0.1299866   | 0.19296513  |
| Gm19238       | 0.630754244 | -0.275194568 | 2.9424759   | -0.093524833 | 0.925486622 | NA          |
| Zfp687        | 399.7435432 | -0.27527515  | 0.141761724 | -1.941815764 | 0.052159408 | 0.087538254 |
| Vps13b        | 705.0946548 | -0.275290311 | 0.194286056 | -1.416932933 | 0.156502537 | 0.225781099 |
| Nab2          | 504.7243158 | -0.275671085 | 0.184337498 | -1.495469387 | 0.134791983 | 0.198869405 |
| Brat1         | 277.9876844 | -0.27598028  | 0.190562214 | -1.448242406 | 0.147549269 | 0.214901318 |
| Dcaf17        | 312.9667804 | -0.276123842 | 0.186561686 | -1.480067252 | 0.1388553   | 0.203773479 |
| Ift74         | 98.34187326 | -0.276155634 | 0.278907485 | -0.990133462 | 0.322108889 | 0.413533575 |
| A930033H14Rik | 134.8281273 | -0.276279749 | 0.38422431  | -0.719058482 | 0.472104887 | 0.562733763 |
| Gpalpp1       | 351.1974294 | -0.276451799 | 0.136998047 | -2.017925108 | 0.043599062 | 0.07488935  |
| Padi1         | 0.630647852 | -0.277198507 | 2.942485239 | -0.094205573 | 0.924945858 | NA          |
| Pdcl          | 389.975915  | -0.277541599 | 0.176116316 | -1.575899417 | 0.115048985 | 0.174156908 |
| Tsen15        | 168.1671125 | -0.277589785 | 0.198752332 | -1.396661781 | 0.162515302 | 0.232742009 |
| Triobp        | 484.7100105 | -0.277596644 | 0.156149783 | -1.777758749 | 0.075443486 | 0.120800277 |
| Cep290        | 75.88604689 | -0.27763033  | 0.316896176 | -0.876092397 | 0.380979806 | 0.472978716 |
| Ppp2r2a       | 466.9987751 | -0.277678929 | 0.140383754 | -1.97799903  | 0.047928816 | 0.081407837 |
| Dctn1         | 882.7398385 | -0.277712444 | 0.140818252 | -1.972133873 | 0.048594326 | 0.082398654 |
| Cdc42bpa      | 892.3253486 | -0.277989099 | 0.191456874 | -1.451967185 | 0.14651073  | 0.213552917 |
| Ppp1r12a      | 806.605002  | -0.278135537 | 0.197362303 | -1.409263738 | 0.158757197 | 0.228280423 |
| C2cd3         | 303.741962  | -0.278297285 | 0.263117456 | -1.057692213 | 0.290195787 | 0.379158321 |
| Klk1b27       | 0.544568305 | -0.278320425 | 3.052135243 | -0.091188759 | 0.927342607 | NA          |
| Ccnq          | 137.6756419 | -0.278418368 | 0.214219128 | -1.299689574 | 0.193707385 | 0.26988587  |
| Ankr13a       | 496.6389789 | -0.27873597  | 0.172157861 | -1.619071988 | 0.105431775 | 0.16141903  |
| Stat1         | 1183.214973 | -0.278792193 | 0.355018655 | -0.785288855 | 0.432284229 | 0.523779782 |
| Jkamp         | 359.0977236 | -0.278833334 | 0.183177469 | -1.522203227 | 0.127958167 | 0.19035173  |
| Rab11b        | 1585.503679 | -0.279268449 | 0.117889721 | -2.368895674 | 0.017841285 | 0.033968978 |
| Des           | 89.2147419  | -0.279322556 | 0.269559478 | -1.036218639 | 0.300100153 | 0.389741399 |
| Eml6          | 26.13611446 | -0.2793827   | 0.595623402 | -0.469059307 | 0.639027244 | 0.716342482 |
| Smco1         | 3.511263701 | -0.279481034 | 1.19492304  | -0.233890405 | 0.815070062 | 0.861778369 |
| Prrc1         | 684.280843  | -0.279633098 | 0.131271295 | -2.130192263 | 0.033155744 | 0.058817806 |
| AU040320      | 514.8607961 | -0.279940646 | 0.272900332 | -1.025798113 | 0.304986756 | 0.395092265 |
| Zmyrn4        | 306.1293504 | -0.279988333 | 0.204459905 | -1.369404592 | 0.17087284  | 0.242976076 |
| Prpf40b       | 679.2293778 | -0.279994469 | 0.278642871 | -1.004850646 | 0.314968773 | 0.406263724 |
| Trim29        | 0.508295769 | -0.280029705 | 3.014121848 | -0.092905901 | 0.925978318 | NA          |
| Ptprz1        | 2.9865882   | -0.280166514 | 1.524816158 | -0.183737897 | 0.854219078 | 0.892133161 |
| Epha7         | 37.68224307 | -0.280169609 | 0.343054909 | -0.816690278 | 0.414105449 | 0.506396219 |
| AC225888.1    | 21.09049297 | -0.280264257 | 0.483537694 | -0.579612015 | 0.562176289 | 0.646828788 |
| Hnrnp1        | 2896.466632 | -0.280628115 | 0.147651621 | -1.900609778 | 0.057353144 | 0.094983135 |
| Fyb           | 341.5533074 | -0.280655307 | 0.216875477 | -1.294085025 | 0.195636054 | 0.272208258 |
| Gm33543       | 358.3158801 | -0.280681304 | 0.314339022 | -0.892925422 | 0.371897112 | 0.464102333 |
| Ccar2         | 585.9750157 | -0.280857973 | 0.152060496 | -1.847014712 | 0.064745008 | 0.105624201 |
| Trp53rka      | 165.3148722 | -0.280932802 | 0.234534938 | -1.19782922  | 0.230983509 | 0.313369956 |
| Tex10         | 168.847216  | -0.280935205 | 0.170935136 | -1.643519356 | 0.100275524 | 0.154747636 |
| Polr2e        | 690.8310323 | -0.281463638 | 0.151633064 | -1.856215455 | 0.063422854 | 0.103715378 |
| Chmp6         | 311.2696398 | -0.281490282 | 0.151939426 | -1.852648055 | 0.06393282  | 0.104469157 |

|               |             |              |             |              |                |             |
|---------------|-------------|--------------|-------------|--------------|----------------|-------------|
| Git2          | 443.5835094 | -0.281541299 | 0.183049553 | -1.538060562 | 0.124033808    | 0.185484943 |
| Vmn1r18       | 16.3891882  | -0.281544151 | 0.476834797 | -0.590443804 | 0.554893151    | 0.640047482 |
| Psmb8         | 636.293936  | -0.281768565 | 0.261923975 | -1.075764696 | 0.282032505    | 0.36988154  |
| Gm48040       | 3.47275429  | -0.281880658 | 1.714766347 | -0.164384296 | 0.869428626    | 0.903451128 |
| Gm21798       | 1.46219115  | -0.282068038 | 1.69793837  | -0.166123837 | 0.868059495 NA |             |
| Preli3a       | 1.547477192 | -0.282201809 | 1.562813263 | -0.180572955 | 0.856702786 NA |             |
| Gm8054        | 0.513588301 | -0.282255996 | 3.008313144 | -0.093825337 | 0.925247904 NA |             |
| Prps2         | 327.9422183 | -0.282550122 | 0.259102899 | -1.090493866 | 0.275495654    | 0.362382131 |
| Tbc1d5        | 325.4247694 | -0.282764907 | 0.144872766 | -1.951815475 | 0.050960116    | 0.085804253 |
| Srd5a3        | 265.7677324 | -0.282966915 | 0.22208329  | -1.27414771  | 0.202611073    | 0.280457418 |
| Zmiz2         | 789.4095849 | -0.282994858 | 0.139941489 | -2.022237013 | 0.043151872    | 0.074203462 |
| Mtrex         | 445.4642403 | -0.283088843 | 0.249139845 | -1.136264826 | 0.255845747    | 0.340754554 |
| Tarbp2        | 473.9602447 | -0.283380538 | 0.14234648  | -1.99078009  | 0.046505069    | 0.07927731  |
| Mcp1          | 91.8143689  | -0.283482981 | 0.294028669 | -0.964133811 | 0.334978843    | 0.427129343 |
| Tmem87b       | 652.8380677 | -0.283658111 | 0.197858773 | -1.433639293 | 0.151675224    | 0.21997101  |
| Arhgef1       | 1441.762539 | -0.2837429   | 0.158700363 | -1.787915889 | 0.073789579    | 0.118485894 |
| Noct          | 1769.023512 | -0.284980211 | 0.218585265 | -1.303748498 | 0.192319348    | 0.268368686 |
| Tmbim1        | 1036.184464 | -0.285114851 | 0.185146467 | -1.539942165 | 0.123574452    | 0.184911547 |
| Als2cl        | 1392.483447 | -0.285447181 | 0.193039917 | -1.478695107 | 0.139221821    | 0.204185616 |
| Zfp358        | 254.6634681 | -0.285458535 | 0.236201154 | -1.208539967 | 0.226839632    | 0.30855837  |
| Tcp11l1       | 102.0052921 | -0.28563653  | 0.254861903 | -1.120750205 | 0.262394205    | 0.347683539 |
| Gpat3         | 98.81343152 | -0.285704711 | 0.270877835 | -1.054736393 | 0.291545902    | 0.380747246 |
| Gm7367        | 48.11632302 | -0.286177915 | 0.603262935 | -0.474383388 | 0.635226537    | 0.712926104 |
| H3c11         | 2.400397468 | -0.286447929 | 1.614936556 | -0.177374107 | 0.859214545    | 0.895722037 |
| 4921524J17Rik | 173.2908709 | -0.286577531 | 0.258585885 | -1.108248934 | 0.267754323    | 0.353905698 |
| Ubt1          | 1380.929032 | -0.28660216  | 0.135880394 | -2.109223782 | 0.03492527     | 0.061527953 |
| Tbc1d13       | 533.2124974 | -0.286729947 | 0.247468402 | -1.158652762 | 0.246597753    | 0.330529011 |
| Tigit         | 11.83331521 | -0.286782896 | 0.652990667 | -0.43918376  | 0.660528391    | 0.734839991 |
| Kcnj15        | 5.818129456 | -0.287033854 | 0.982844371 | -0.292044053 | 0.770252942    | 0.825866173 |
| Lnx2          | 437.9715009 | -0.287041407 | 0.198454773 | -1.446381983 | 0.148070093    | 0.215426469 |
| Map2k6        | 123.4190783 | -0.287167227 | 0.31921027  | -0.899617756 | 0.368323704    | 0.460654575 |
| Atf6b         | 512.7274898 | -0.287320773 | 0.194203971 | -1.479479393 | 0.139012235    | 0.203930865 |
| Atxn7l3       | 681.3620103 | -0.287807265 | 0.173876307 | -1.655241417 | 0.097875537    | 0.151579047 |
| Cyp3a41a      | 2.975197695 | -0.287909611 | 1.492791719 | -0.192866565 | 0.84706347     | 0.886533123 |
| Tmem198b      | 159.0198246 | -0.288482915 | 0.169650778 | -1.700451476 | 0.089046036    | 0.139925968 |
| Bop1          | 550.9403609 | -0.288556985 | 0.222189179 | -1.298699538 | 0.194047063    | 0.270270778 |
| Lrfr1         | 24.24027867 | -0.288830168 | 0.497839137 | -0.580167661 | 0.56180156     | 0.646523086 |
| Usf1          | 573.0356226 | -0.288976749 | 0.149200374 | -1.93683663  | 0.052765317    | 0.088389812 |
| Acnat2        | 292.9231682 | -0.289237708 | 0.472558734 | -0.612067216 | 0.540493287    | 0.627434308 |
| Tnks2         | 1205.172917 | -0.289403107 | 0.161242224 | -1.794834502 | 0.072680072    | 0.116957699 |
| Rangap1       | 1309.659098 | -0.289712565 | 0.193359508 | -1.498310422 | 0.134052618    | 0.197983975 |
| Atxn1l        | 429.1537716 | -0.28999787  | 0.14758029  | -1.965017614 | 0.049412199    | 0.083505521 |
| Map4k2        | 444.753718  | -0.290885809 | 0.23686868  | -1.228046735 | 0.219429424    | 0.300058781 |
| Smug1         | 227.5063083 | -0.291033997 | 0.186968411 | -1.556594481 | 0.119566795    | 0.179852529 |
| Zfp790        | 113.3778346 | -0.291082523 | 0.2275229   | -1.279354835 | 0.200772131    | 0.278182972 |
| Ostc          | 885.5441002 | -0.291327933 | 0.260212551 | -1.119576793 | 0.262894149    | 0.34826478  |
| Fbx18         | 252.3516227 | -0.291453519 | 0.202344311 | -1.440384052 | 0.149758773    | 0.217598872 |
| Plin1         | 2.848464649 | -0.291507062 | 1.25334735  | -0.23258282  | 0.816085369    | 0.862691348 |
| Rab39b        | 0.959081047 | -0.291522598 | 2.237111282 | -0.130312068 | 0.896319533 NA |             |
| Zfp62         | 467.5034289 | -0.291698566 | 0.154238491 | -1.891217712 | 0.058595288    | 0.096790506 |
| Gm8979        | 6.498864381 | -0.291715527 | 0.726681477 | -0.401435204 | 0.688099735    | 0.758382905 |
| Zbtb10        | 137.651294  | -0.29203485  | 0.235494915 | -1.240089834 | 0.214942169    | 0.294702758 |
| Gm2602        | 27.78787947 | -0.292071509 | 0.476032661 | -0.613553508 | 0.539510414    | 0.626665772 |
| C1qtnf12      | 42.77086816 | -0.292301173 | 0.434544114 | -0.672661678 | 0.501162553    | 0.590695465 |
| Atf1          | 473.2923638 | -0.292440618 | 0.205941928 | -1.420014956 | 0.155603327    | 0.224788198 |
| LTO1          | 235.1200919 | -0.293300454 | 0.213804228 | -1.371817839 | 0.170120153    | 0.242026901 |
| Sdad1         | 331.3375644 | -0.293542124 | 0.196373459 | -1.494815671 | 0.134962555    | 0.199040204 |
| Snx30         | 183.5366544 | -0.293738916 | 0.198470152 | -1.480015569 | 0.138869092    | 0.203773479 |
| lldr2         | 646.9613022 | -0.294135735 | 0.355726239 | -0.826859824 | 0.408316517    | 0.500753902 |
| Elk1          | 175.2021969 | -0.294201242 | 0.179767077 | -1.63656909  | 0.101720539    | 0.156568184 |
| Gm18398       | 2.534212965 | -0.294225348 | 1.236159446 | -0.238015694 | 0.811868922    | 0.859406481 |
| Polr3b        | 269.6130482 | -0.294436826 | 0.195325699 | -1.507414681 | 0.131704398    | 0.195056605 |
| Pat1l         | 442.383621  | -0.294684953 | 0.170424906 | -1.729119059 | 0.083787789    | 0.132592056 |
| Zzz3          | 597.4378223 | -0.294896668 | 0.203466311 | -1.449363616 | 0.147236064    | 0.214481792 |
| Spred3        | 43.38822725 | -0.294967396 | 0.382915908 | -0.770318989 | 0.441110695    | 0.532280232 |
| Tada3         | 270.4456565 | -0.295079479 | 0.171420033 | -1.721382697 | 0.085181402    | 0.134547627 |



|               |             |              |             |              |             |             |
|---------------|-------------|--------------|-------------|--------------|-------------|-------------|
| Dcst2         | 2.471108955 | -0.295122753 | 1.37565574  | -0.214532419 | 0.830131889 | 0.87369357  |
| Kcnipl4       | 4.283704784 | -0.295144213 | 1.286888544 | -0.229347145 | 0.818599114 | 0.864544523 |
| Lsm5          | 130.8299014 | -0.29522076  | 0.29316258  | -1.007020609 | 0.313924871 | 0.405070481 |
| Cox7a2l       | 2194.830059 | -0.295371723 | 0.150748257 | -1.959370739 | 0.050069385 | 0.084479698 |
| Ccser2        | 805.262354  | -0.29548852  | 0.241626291 | -1.22291543  | 0.22136164  | 0.302216164 |
| Tnfrsf1a      | 1605.346132 | -0.295519117 | 0.149157708 | -1.981252732 | 0.047562938 | 0.080866956 |
| Gga2          | 294.3451033 | -0.295533584 | 0.160282044 | -1.84383464  | 0.065207243 | 0.106296909 |
| Sun1          | 372.1993729 | -0.295576858 | 0.225039564 | -1.313443967 | 0.18903339  | 0.264591935 |
| Elf2          | 536.4975513 | -0.29564397  | 0.150150878 | -1.968979292 | 0.048955469 | 0.082895594 |
| Bptf          | 711.1281045 | -0.296030073 | 0.176793284 | -1.674441844 | 0.094043795 | 0.146550148 |
| Papss1        | 411.6856375 | -0.296185703 | 0.174552071 | -1.696832938 | 0.08972825  | 0.140888743 |
| Nme7          | 138.7580883 | -0.296275082 | 0.246559334 | -1.201638069 | 0.229503785 | 0.31170973  |
| Ing3          | 182.1101843 | -0.296280464 | 0.176040274 | -1.6830266   | 0.092369942 | 0.144311105 |
| Amdhd2        | 494.2419871 | -0.296288351 | 0.231139604 | -1.281858867 | 0.199892159 | 0.277143911 |
| D030056L22Rik | 176.3318855 | -0.29644427  | 0.212244975 | -1.396708075 | 0.162501375 | 0.232742009 |
| Nexmif        | 2.364370307 | -0.296543363 | 1.597097291 | -0.185676455 | 0.852698493 | 0.890953905 |
| G430095P16Rik | 7.830316562 | -0.296665125 | 0.692985541 | -0.428097136 | 0.668580402 | 0.741330646 |
| Galk2         | 319.3514125 | -0.296955213 | 0.153158972 | -1.938869188 | 0.052517269 | 0.088010878 |
| Bbs9          | 90.93532327 | -0.297192894 | 0.295153941 | -1.006908102 | 0.313978938 | 0.405109584 |
| Fam53b        | 185.8653426 | -0.297210221 | 0.274877282 | -1.081246947 | 0.27958728  | 0.367109989 |
| Mucl1         | 0.187899014 | -0.297378601 | 3.637643129 | -0.081750351 | 0.934845238 | NA          |
| Mfsd4b4       | 160.2497696 | -0.297455367 | 0.180177847 | -1.650898661 | 0.098759269 | 0.152781127 |
| Pygo2         | 423.9419093 | -0.297457645 | 0.136201025 | -2.1839604   | 0.028965158 | 0.052159926 |
| Pbrm1         | 797.6020663 | -0.297600626 | 0.169255359 | -1.758293669 | 0.078697554 | 0.125456883 |
| Gm6330        | 0.221152547 | -0.297678186 | 3.634648127 | -0.081900139 | 0.934726124 | NA          |
| Epo           | 0.167924107 | -0.29789522  | 3.637860472 | -0.081887478 | 0.934736192 | NA          |
| Ramp2         | 121.7044268 | -0.297908952 | 0.25841354  | -1.152838014 | 0.248976878 | 0.333115509 |
| Zfp30         | 79.22165087 | -0.297943749 | 0.333482331 | -0.893431891 | 0.371625931 | 0.463865783 |
| Stard8        | 178.3882618 | -0.29796043  | 0.250602452 | -1.188976515 | 0.234448909 | 0.317263454 |
| Cttnb1        | 4331.081733 | -0.298011485 | 0.210608922 | -1.41499934  | 0.157068689 | 0.226396541 |
| Serpinf2      | 16899.50627 | -0.298062158 | 0.182645414 | -1.631917013 | 0.10269697  | 0.157855733 |
| Cldn8         | 6.154368856 | -0.298086397 | 0.8829349   | -0.337608579 | 0.735658176 | 0.797551707 |
| Zbtb26        | 173.40206   | -0.298183831 | 0.217920897 | -1.368312237 | 0.171214362 | 0.243299362 |
| Fgfr1l        | 575.3400121 | -0.298261388 | 0.246333072 | -1.210805296 | 0.225970035 | 0.307542992 |
| Tex29         | 0.226562649 | -0.298841931 | 3.634289385 | -0.082228436 | 0.934465062 | NA          |
| Pabpc1        | 4852.838027 | -0.299011895 | 0.146666203 | -2.038723917 | 0.041477589 | 0.071664127 |
| Scaf8         | 522.0082911 | -0.299122706 | 0.145292669 | -2.058759796 | 0.039517255 | 0.06868082  |
| Zfp862-ps     | 81.87371914 | -0.29922707  | 0.355542889 | -0.841606115 | 0.400008465 | 0.492940893 |
| Slc35c2       | 524.6641298 | -0.299346138 | 0.217812068 | -1.374332196 | 0.169338575 | 0.241078821 |
| Gm5850        | 0.159090442 | -0.299636149 | 3.639441765 | -0.08233025  | 0.9343841   | NA          |
| Dnah11        | 16.78254076 | -0.299972626 | 0.902812757 | -0.332264497 | 0.739689546 | 0.800801891 |
| Rps13         | 2923.599655 | -0.300039255 | 0.152057278 | -1.973198909 | 0.048472905 | 0.0822173   |
| Urb2          | 171.1593595 | -0.300082725 | 0.273381109 | -1.097671767 | 0.272347842 | 0.359003017 |
| Ythdf1        | 763.0210828 | -0.30015386  | 0.178350972 | -1.682939306 | 0.092386842 | 0.144324281 |
| Haus5         | 189.1340535 | -0.30024851  | 0.240347784 | -1.249225205 | 0.211582715 | 0.290751421 |
| Fads6         | 2859.364558 | -0.300381609 | 0.257274715 | -1.167552004 | 0.24298752  | 0.326640217 |
| Fus           | 3530.386762 | -0.300569793 | 0.18099302  | -1.660670637 | 0.096779614 | 0.150140946 |
| Nefm          | 0.16261974  | -0.3005807   | 3.638738098 | -0.082605753 | 0.934165027 | NA          |
| Rpa3          | 136.8353328 | -0.300582847 | 0.310753419 | -0.967271247 | 0.333408454 | 0.425540714 |
| Taf5l         | 279.1717226 | -0.300737807 | 0.171677129 | -1.751763962 | 0.079814403 | 0.126928727 |
| Map7d1        | 962.6191678 | -0.300882337 | 0.13630438  | -2.207429706 | 0.027284053 | 0.049503888 |
| Nom1          | 434.5334452 | -0.300948186 | 0.18893515  | -1.592864994 | 0.111190481 | 0.169126991 |
| Eef1aknmt     | 219.1896207 | -0.301213015 | 0.227423021 | -1.32446141  | 0.185349851 | 0.260390957 |
| Synj1         | 292.1838614 | -0.301331627 | 0.19648941  | -1.533576932 | 0.125133767 | 0.186867595 |
| Fbxl5         | 511.3219884 | -0.301383353 | 0.27304732  | -1.103777003 | 0.269689883 | 0.356049959 |
| Rbmxl1        | 467.4070241 | -0.301642806 | 0.175136025 | -1.722334435 | 0.085008953 | 0.13431257  |
| Zeb1          | 293.3153413 | -0.301704305 | 0.181545932 | -1.661862106 | 0.096540426 | 0.149838054 |
| Mettl15       | 75.25650585 | -0.301731887 | 0.342927838 | -0.879869912 | 0.378929786 | 0.47093396  |
| Smg9          | 263.9450098 | -0.301946058 | 0.229755211 | -1.314207658 | 0.188776332 | 0.264355094 |
| Prrm1         | 0.160612758 | -0.302010072 | 3.639115234 | -0.082989972 | 0.933859513 | NA          |
| Nfatc3        | 565.2857193 | -0.302102671 | 0.16260692  | -1.857870938 | 0.063187344 | 0.103401377 |
| D930048N14Rik | 272.9651626 | -0.302108279 | 0.338751022 | -0.891829869 | 0.372484129 | 0.464734539 |
| Casz1         | 23.79929868 | -0.302124379 | 0.512232195 | -0.589819192 | 0.555311874 | 0.640394834 |
| Plaat5        | 0.17701428  | -0.302136045 | 3.639146618 | -0.083023873 | 0.933832557 | NA          |
| Kif5b         | 881.3616811 | -0.302368677 | 0.199002086 | -1.51942466  | 0.128655639 | 0.191272462 |
| Igkv3-3       | 0.15975306  | -0.302708901 | 3.639286154 | -0.083178098 | 0.933709927 | NA          |

|               |             |              |             |              |             |    |             |
|---------------|-------------|--------------|-------------|--------------|-------------|----|-------------|
| Gm43730       | 0.159747429 | -0.302713665 | 3.639287293 | -0.083179381 | 0.933708907 | NA |             |
| Alox8         | 1.640665647 | -0.302721358 | 1.560361967 | -0.194007137 | 0.846170293 |    | 0.885761461 |
| Gm33952       | 0.159697184 | -0.302756284 | 3.639297475 | -0.083190859 | 0.933699781 | NA |             |
| Gm47669       | 0.159686903 | -0.302765029 | 3.639299561 | -0.083193215 | 0.933697908 | NA |             |
| Gm10689       | 0.159657531 | -0.30279006  | 3.639305525 | -0.083199956 | 0.933692548 | NA |             |
| Gm10840       | 0.176012463 | -0.302804075 | 3.639308861 | -0.083203731 | 0.933689546 | NA |             |
| Gm14970       | 0.175997875 | -0.302814165 | 3.639311261 | -0.083206449 | 0.933687385 | NA |             |
| Igkv3-9       | 0.175991192 | -0.302818792 | 3.639312361 | -0.083207695 | 0.933686395 | NA |             |
| Gm8503        | 0.159602845 | -0.302836846 | 3.639316649 | -0.083212557 | 0.933682528 | NA |             |
| Gm48598       | 0.159561445 | -0.302872424 | 3.639325088 | -0.083222141 | 0.933674908 | NA |             |
| Gm3835        | 0.175884876 | -0.302892687 | 3.639329887 | -0.083227599 | 0.933670568 | NA |             |
| Gm17661       | 0.175869753 | -0.302903245 | 3.639332385 | -0.083230442 | 0.933668307 | NA |             |
| 2810021J22Rik | 73.16639589 | -0.302934267 | 0.427426271 | -0.708740402 | 0.478485588 |    | 0.568804289 |
| Gm7791        | 0.159468775 | -0.30295256  | 3.639344031 | -0.083243727 | 0.933657744 | NA |             |
| Gm6214        | 0.159465438 | -0.302955459 | 3.639344715 | -0.083244508 | 0.933657123 | NA |             |
| Gm525         | 0.159446755 | -0.302971705 | 3.639348544 | -0.083248884 | 0.933653644 | NA |             |
| Zfp389        | 1.471392773 | -0.302983822 | 1.697667672 | -0.178470632 | 0.858353384 | NA |             |
| Gm6794        | 0.175753767 | -0.302984602 | 3.639351581 | -0.083252358 | 0.933650881 | NA |             |
| Rpl19-ps9     | 0.159402335 | -0.303010442 | 3.639357659 | -0.08325932  | 0.933645346 | NA |             |
| Gm12842       | 0.175713753 | -0.303012828 | 3.63935822  | -0.083259962 | 0.933644835 | NA |             |
| Gm48873       | 0.182960815 | -0.303027228 | 3.639361603 | -0.083263842 | 0.933641751 | NA |             |
| Gm5356        | 0.159368608 | -0.303039962 | 3.639364591 | -0.083267272 | 0.933639023 | NA |             |
| Aprt-ps       | 0.17566347  | -0.303048414 | 3.639366575 | -0.083269549 | 0.933637212 | NA |             |
| Gm48620       | 0.182924689 | -0.303050801 | 3.639367135 | -0.083270192 | 0.933636701 | NA |             |
| Gm47086       | 0.182919134 | -0.303054431 | 3.639367986 | -0.08327117  | 0.933635923 | NA |             |
| a             | 0.175654228 | -0.303054969 | 3.639368112 | -0.083271315 | 0.933635808 | NA |             |
| Trav3-3       | 0.182913146 | -0.303058345 | 3.639368903 | -0.083272225 | 0.933635085 | NA |             |
| Tpt1-ps5      | 0.175643481 | -0.303062597 | 3.6393699   | -0.08327337  | 0.933634174 | NA |             |
| LT629147.1    | 0.159335896 | -0.303068683 | 3.639371325 | -0.08327501  | 0.933632871 | NA |             |
| Gm8062        | 0.182883885 | -0.303077494 | 3.639373389 | -0.083277384 | 0.933630983 | NA |             |
| Rps19-ps4     | 0.182879361 | -0.303080458 | 3.639374083 | -0.083278182 | 0.933630348 | NA |             |
| Smbd1         | 0.159308854 | -0.303092491 | 3.639376898 | -0.083281424 | 0.93362777  | NA |             |
| Gm13282       | 0.175596263 | -0.30309618  | 3.639377762 | -0.083282418 | 0.93362698  | NA |             |
| Gm44609       | 0.182848854 | -0.303100468 | 3.639378765 | -0.083283573 | 0.933626061 | NA |             |
| Gm12704       | 0.182840692 | -0.303105829 | 3.639380018 | -0.083285018 | 0.933624913 | NA |             |
| Gm8317        | 0.182826913 | -0.303114884 | 3.639382135 | -0.083287457 | 0.933622973 | NA |             |
| Gm13880       | 0.182825724 | -0.303115666 | 3.639382317 | -0.083287668 | 0.933622806 | NA |             |
| Gm12551       | 0.159269508 | -0.30312724  | 3.63938502  | -0.083290786 | 0.933620326 | NA |             |
| Gm2796        | 0.182804406 | -0.303129693 | 3.639385593 | -0.083291447 | 0.933619801 | NA |             |
| Tmem190       | 0.175540976 | -0.303135649 | 3.639386983 | -0.083293052 | 0.933618525 | NA |             |
| Gm8813        | 0.175533745 | -0.303140822 | 3.63938819  | -0.083294446 | 0.933617417 | NA |             |
| Gm3170        | 0.159057206 | -0.303145223 | 3.639389216 | -0.083295631 | 0.933616474 | NA |             |
| Gm3348        | 0.159057206 | -0.303145223 | 3.639389216 | -0.083295631 | 0.933616474 | NA |             |
| Rpl18a-ps1    | 0.182774537 | -0.303149381 | 3.639390186 | -0.083296752 | 0.933615583 | NA |             |
| Gm16585       | 0.175516514 | -0.303153162 | 3.639391068 | -0.083297771 | 0.933614773 | NA |             |
| Gm5599        | 0.159226654 | -0.303165232 | 3.63939388  | -0.083301023 | 0.933612187 | NA |             |
| Gm19253       | 0.182750073 | -0.303165535 | 3.639393952 | -0.083301104 | 0.933612122 | NA |             |
| Gm5278        | 0.182734074 | -0.303176113 | 3.639396415 | -0.083303954 | 0.933609856 | NA |             |
| Smcp          | 0.159185954 | -0.303201456 | 3.639402311 | -0.083310783 | 0.933604427 | NA |             |
| Igll1         | 0.159181518 | -0.303205412 | 3.639403231 | -0.083311849 | 0.933603579 | NA |             |
| Hoxa6         | 0.159179583 | -0.303207139 | 3.639403632 | -0.083312314 | 0.933603209 | NA |             |
| Gm8712        | 0.175432479 | -0.303213564 | 3.639405126 | -0.083314046 | 0.933601832 | NA |             |
| Gm13312       | 0.175419821 | -0.303222694 | 3.639407246 | -0.083316506 | 0.933599876 | NA |             |
| Gm16177       | 0.175419821 | -0.303222694 | 3.639407246 | -0.083316506 | 0.933599876 | NA |             |
| Gm12852       | 0.175419101 | -0.303223214 | 3.639407367 | -0.083316646 | 0.933599765 | NA |             |
| Gm47959       | 0.15915337  | -0.303230556 | 3.639409071 | -0.083318624 | 0.933598192 | NA |             |
| Gm18955       | 0.182641894 | -0.303237279 | 3.639410632 | -0.083320435 | 0.933596752 | NA |             |
| Aldoa-ps4     | 0.175396049 | -0.303239863 | 3.639411232 | -0.083321132 | 0.933596198 | NA |             |
| Gm18524       | 0.175386092 | -0.303247063 | 3.639412902 | -0.083323072 | 0.933594655 | NA |             |
| Rps12-ps20    | 0.176946302 | -0.303247424 | 3.639412985 | -0.083323169 | 0.933594578 | NA |             |
| Rps12-ps21    | 0.176946302 | -0.303247424 | 3.639412985 | -0.083323169 | 0.933594578 | NA |             |
| Rps12-ps22    | 0.176946302 | -0.303247424 | 3.639412985 | -0.083323169 | 0.933594578 | NA |             |
| Gm4857        | 0.175376646 | -0.303253899 | 3.639414487 | -0.083324914 | 0.933593191 | NA |             |
| Gm6543        | 0.175363884 | -0.303263141 | 3.639416629 | -0.083327404 | 0.933591211 | NA |             |
| Gm11865       | 0.175338586 | -0.303281487 | 3.639420877 | -0.083332348 | 0.93358728  | NA |             |
| Rpl7-ps7      | 0.182544526 | -0.303302291 | 3.63942569  | -0.083337954 | 0.933582822 | NA |             |

|           |             |              |              |              |              |             |    |
|-----------|-------------|--------------|--------------|--------------|--------------|-------------|----|
| Gm9722    | 0.182543042 | -0.303303284 | 3.63942592   | -0.083338222 | 0.933582609  | NA          |    |
| Gm5678    | 0.175305579 | -0.303305474 | 3.639426426  | -0.083338812 | 0.93358214   | NA          |    |
| Gm7284    | 0.17530374  | -0.303306813 | 3.639426735  | -0.083339173 | 0.933581853  | NA          |    |
| Gm12807   | 0.175297309 | -0.303311493 | 3.639427817  | -0.083340434 | 0.933580851  | NA          |    |
| Gm5530    | 0.175289501 | -0.30331718  | 3.639429131  | -0.083341966 | 0.933579632  | NA          |    |
| Gm4879    | 0.159056864 | -0.303317263 | 3.639429149  | -0.083341989 | 0.933579614  | NA          |    |
| Gm9429    | 0.182513581 | -0.303323039 | 3.639430484  | -0.083343545 | 0.933578377  | NA          |    |
| Trex2     | 0.175279335 | -0.303324588 | 3.639430842  | -0.083343963 | 0.933578045  | NA          |    |
| Gm5256    | 0.182509984 | -0.303325454 | 3.639431042  | -0.083344196 | 0.933577859  | NA          |    |
| Gm11990   | 0.182502304 | -0.303330611 | 3.639432233  | -0.083345586 | 0.933576754  | NA          |    |
| Gm5430    | 0.18249574  | -0.303335021 | 3.63943325   | -0.083346774 | 0.933575809  | NA          |    |
| Gm8664    | 0.182488129 | -0.303340137 | 3.639434431  | -0.083348153 | 0.933574713  | NA          |    |
| Gm39653   | 0.17525493  | -0.303342395 | 3.639434952  | -0.083348761 | 0.933574229  | NA          |    |
| Gm4751    | 0.17525493  | -0.303342395 | 3.639434952  | -0.083348761 | 0.933574229  | NA          |    |
| Gm4513    | 0.159028296 | -0.30334308  | 3.639435109  | -0.083348946 | 0.933574082  | NA          |    |
| Gm4565    | 0.159028296 | -0.30334308  | 3.639435109  | -0.083348946 | 0.933574082  | NA          |    |
| Gm14807   | 0.182473531 | -0.303349956 | 3.639436696  | -0.083350799 | 0.933572609  | NA          |    |
| Kit       | 79.84189189 | -0.303356534 | 0.282123507  | -1.075261458 | 0.282257687  | 0.370091451 |    |
|           | 12-Sep      | 0.175227876  | -0.303362171 | 3.639439511  | -0.083354091 | 0.933569992 | NA |
| Gm6781    | 0.175224956 | -0.303364307 | 3.639440003  | -0.083354666 | 0.933569534  | NA          |    |
| R3hdml    | 0.182444223 | -0.303369698 | 3.639441246  | -0.083356119 | 0.933568379  | NA          |    |
| Gm15163   | 0.175214047 | -0.303372295 | 3.639441843  | -0.083356819 | 0.933567822  | NA          |    |
| Gm5855    | 0.175213531 | -0.303372672 | 3.63944193   | -0.083356921 | 0.933567742  | NA          |    |
| Gm14026   | 0.158987097 | -0.303380435 | 3.639443717  | -0.083359013 | 0.933566078  | NA          |    |
| Acot5     | 0.175198353 | -0.303383796 | 3.639444491  | -0.083359918 | 0.933565358  | NA          |    |
| Gm4027    | 0.158981685 | -0.303385352 | 3.639444849  | -0.083360338 | 0.933565024  | NA          |    |
| Gm7709    | 0.158981004 | -0.303385971 | 3.639444991  | -0.083360505 | 0.933564892  | NA          |    |
| Gm6524    | 0.175192427 | -0.303388142 | 3.639445492  | -0.08336109  | 0.933564427  | NA          |    |
| Klk14     | 0.182409803 | -0.303392932 | 3.639446594  | -0.083362381 | 0.9335634    | NA          |    |
| Gm6811    | 0.17518095  | -0.303396565 | 3.639447429  | -0.08336336  | 0.933562622  | NA          |    |
| Dleu7     | 0.182402986 | -0.303397539 | 3.639447654  | -0.083363622 | 0.933562413  | NA          |    |
| Thegl     | 0.175169019 | -0.303405328 | 3.639449444  | -0.083365721 | 0.933560744  | NA          |    |
| Nog       | 0.175163684 | -0.30340925  | 3.639450346  | -0.083366778 | 0.933559904  | NA          |    |
| Cuzd1     | 0.158953704 | -0.303410818 | 3.639450706  | -0.083367201 | 0.933559568  | NA          |    |
| Rnf212b   | 0.175161431 | -0.303410906 | 3.639450726  | -0.083367225 | 0.933559549  | NA          |    |
| Gm6085    | 0.182382012 | -0.303411729 | 3.639450916  | -0.083367446 | 0.933559372  | NA          |    |
| Gm11405   | 0.182372453 | -0.303418203 | 3.639452403  | -0.083369191 | 0.933557985  | NA          |    |
| Olfr923   | 0.158941698 | -0.303421764 | 3.639453221  | -0.083370151 | 0.933557222  | NA          |    |
| Kcnmb3    | 0.182357564 | -0.303428294 | 3.639454721  | -0.083371911 | 0.933555823  | NA          |    |
| Best3     | 0.158932642 | -0.303430029 | 3.639455119  | -0.083372378 | 0.933555451  | NA          |    |
| Olfr744   | 0.182353492 | -0.303431056 | 3.639455355  | -0.083372655 | 0.933555231  | NA          |    |
| Tfap2e    | 0.17513404  | -0.303431065 | 3.639455357  | -0.083372657 | 0.933555229  | NA          |    |
| Tmem235   | 0.182349295 | -0.303433903 | 3.639456009  | -0.083373422 | 0.933554621  | NA          |    |
| Sp7       | 0.158927232 | -0.303434971 | 3.639456253  | -0.08337371  | 0.933554392  | NA          |    |
| Nr5a1     | 0.158924845 | -0.303437152 | 3.639456753  | -0.083374298 | 0.933553925  | NA          |    |
| Pabpc5    | 0.17512519  | -0.303437586 | 3.639456854  | -0.083374415 | 0.933553832  | NA          |    |
| Gm6189    | 0.1823326   | -0.303445236 | 3.639458609  | -0.083376477 | 0.933552192  | NA          |    |
| Olfr824   | 0.158907847 | -0.303452695 | 3.639460319  | -0.083378487 | 0.933550594  | NA          |    |
| Olfr1426  | 0.182316147 | -0.303456417 | 3.639461173  | -0.08337949  | 0.933549796  | NA          |    |
| Kctd19    | 0.175097044 | -0.303458356 | 3.639461617  | -0.083380013 | 0.933549381  | NA          |    |
| Chrna10   | 0.182313224 | -0.303458405 | 3.639461629  | -0.083380026 | 0.93354937   | NA          |    |
| Gm28168   | 0.182309131 | -0.303461189 | 3.639462267  | -0.083380776 | 0.933548774  | NA          |    |
| Stra6     | 0.182306082 | -0.303463264 | 3.639462743  | -0.083381335 | 0.933548329  | NA          |    |
| Olfr681   | 0.158895917 | -0.30346362  | 3.639462823  | -0.083381431 | 0.933548253  | NA          |    |
| Zkscan16  | 0.182304005 | -0.303464677 | 3.639463066  | -0.083381716 | 0.933548026  | NA          |    |
| Trpc5os   | 0.175084319 | -0.30346776  | 3.639463773  | -0.083382547 | 0.933547366  | NA          |    |
| Adamts18  | 0.17508414  | -0.303467892 | 3.639463803  | -0.083382583 | 0.933547337  | NA          |    |
| Tmc1      | 0.175074775 | -0.303474818 | 3.639465389  | -0.083384449 | 0.933545853  | NA          |    |
| Zbed4-ps2 | 0.18228865  | -0.303475131 | 3.639465461  | -0.083384534 | 0.933545786  | NA          |    |
| Olfr201   | 0.18228415  | -0.303478197 | 3.639466163  | -0.08338536  | 0.933545129  | NA          |    |
| Olfr67    | 0.182281897 | -0.303479732 | 3.639466515  | -0.083385774 | 0.9335448    | NA          |    |
| Mrgprx2   | 0.175067851 | -0.303479942 | 3.639466563  | -0.083385883 | 0.933544755  | NA          |    |
| Olfr550   | 0.175064202 | -0.303482644 | 3.639467181  | -0.083386559 | 0.933544176  | NA          |    |
| Vmn1r14   | 0.175050924 | -0.30349248  | 3.639469433  | -0.08338921  | 0.933542068  | NA          |    |
| Il21      | 0.168767533 | -0.303568174 | 3.639486717  | -0.083409612 | 0.933525846  | NA          |    |
| Olfr1019  | 0.168766634 | -0.303568899 | 3.639486882  | -0.083409807 | 0.933525691  | NA          |    |

|           |             |              |             |              |             |    |             |
|-----------|-------------|--------------|-------------|--------------|-------------|----|-------------|
| Pate14    | 0.168746873 | -0.303584847 | 3.639490514 | -0.083414106 | 0.933522273 | NA |             |
| Glce      | 323.8970324 | -0.303598245 | 0.311381753 | -0.975003328 | 0.329558609 |    | 0.421542255 |
| Ntn5      | 0.168693036 | -0.303628421 | 3.639500424 | -0.083425851 | 0.933512934 | NA |             |
| Tex52     | 0.168685795 | -0.303634296 | 3.639501758 | -0.083427435 | 0.933511675 | NA |             |
| Gm8212    | 0.168683484 | -0.303636172 | 3.639502184 | -0.083427941 | 0.933511272 | NA |             |
| Gm4803    | 0.168667181 | -0.303649414 | 3.63950519  | -0.08343151  | 0.933508434 | NA |             |
| Olfr153   | 0.168664082 | -0.303651934 | 3.639505762 | -0.083432189 | 0.933507894 | NA |             |
| Gm5303    | 0.168663174 | -0.303652671 | 3.639505929 | -0.083432388 | 0.933507736 | NA |             |
| Rnf151    | 0.168653015 | -0.303660935 | 3.639507803 | -0.083434616 | 0.933505965 | NA |             |
| Tsg101-ps | 0.168649705 | -0.303663629 | 3.639508414 | -0.083435342 | 0.933505388 | NA |             |
| Il2       | 0.168645047 | -0.30366742  | 3.639509274 | -0.083436364 | 0.933504575 | NA |             |
| Gm28912   | 0.158660568 | -0.303681641 | 3.639512496 | -0.083440197 | 0.933501527 | NA |             |
| Gm9423    | 0.168612821 | -0.303693693 | 3.639515225 | -0.083443446 | 0.933498944 | NA |             |
| BC085271  | 0.16857331  | -0.303725995 | 3.639522532 | -0.083452154 | 0.93349202  | NA |             |
| Gm16166   | 0.16854098  | -0.303752503 | 3.639528518 | -0.0834593   | 0.933486338 | NA |             |
| Plac8l1   | 0.168529635 | -0.303761821 | 3.63953062  | -0.083461812 | 0.933484341 | NA |             |
| Acvr1b    | 345.0893871 | -0.303776002 | 0.189183717 | -1.605719593 | 0.108335534 |    | 0.165285859 |
| Gm7868    | 0.168482479 | -0.303800641 | 3.639539368 | -0.083472278 | 0.93347602  | NA |             |
| Gm12011   | 0.16843634  | -0.303838766 | 3.639547942 | -0.083482556 | 0.933467847 | NA |             |
| Gm33707   | 0.168390214 | -0.303877019 | 3.639556528 | -0.08349287  | 0.933459647 | NA |             |
| Ehmt2     | 1789.089794 | -0.303892585 | 0.162793843 | -1.866732664 | 0.06193893  |    | 0.101600585 |
| Gm17669   | 0.168248686 | -0.303995269 | 3.639582965 | -0.083524753 | 0.933434296 | NA |             |
| Gm6677    | 0.168196951 | -0.304038829 | 3.639592663 | -0.083536499 | 0.933424957 | NA |             |
| Gm15565   | 0.16816883  | -0.304062581 | 3.639597942 | -0.083542904 | 0.933419864 | NA |             |
| Trbv12-2  | 0.168058933 | -0.304155915 | 3.639618628 | -0.083568073 | 0.933399852 | NA |             |
| Btla      | 22.09770431 | -0.304183841 | 0.60300884  | -0.504571112 | 0.613860104 |    | 0.69433964  |
| Mmp17     | 9.684329924 | -0.304431568 | 0.591040257 | -0.515077551 | 0.606498829 |    | 0.687818966 |
| Togaram2  | 0.173671657 | -0.30456749  | 3.639708731 | -0.083679083 | 0.933311588 | NA |             |
| Herc6     | 258.5445227 | -0.304567676 | 0.339438616 | -0.89726879  | 0.369575506 |    | 0.461813621 |
| Tecpr2    | 302.6699325 | -0.304595447 | 0.199408382 | -1.527495702 | 0.126637795 |    | 0.188683895 |
| Zyg11b    | 790.6390937 | -0.304813192 | 0.223942522 | -1.361122439 | 0.173474999 |    | 0.246101505 |
| Gm47254   | 0.157505296 | -0.304824768 | 3.639764171 | -0.083748494 | 0.9332564   | NA |             |
| Gm15517   | 0.180417666 | -0.30483118  | 3.639765546 | -0.083750224 | 0.933255024 | NA |             |
| Rab3gap2  | 535.6407002 | -0.30485601  | 0.173655683 | -1.75551991  | 0.079170418 |    | 0.126104577 |
| Gm10340   | 0.206401956 | -0.30490974  | 3.629796761 | -0.084001877 | 0.93305494  | NA |             |
| Gm45208   | 11.33321281 | -0.304942269 | 0.7734231   | -0.394276133 | 0.693377182 |    | 0.762674637 |
| Rad1      | 136.0792227 | -0.305060947 | 0.194200716 | -1.570853873 | 0.116216595 |    | 0.175659366 |
| Gm37713   | 0.157275922 | -0.305067009 | 3.639815782 | -0.08381386  | 0.933204428 | NA |             |
| Arfip1    | 427.9882961 | -0.305222902 | 0.18852862  | -1.618973831 | 0.105452894 |    | 0.161432565 |
| Pkdcc     | 432.1841252 | -0.305269313 | 0.197667282 | -1.544359336 | 0.122501305 |    | 0.18348289  |
| Vcl       | 1002.33196  | -0.305271232 | 0.216394334 | -1.410717305 | 0.158327986 |    | 0.227797747 |
| Gm19680   | 51.97881393 | -0.305474943 | 1.179617986 | -0.258960907 | 0.795665404 |    | 0.846056878 |
| Bub3      | 624.9975855 | -0.305616024 | 0.162953989 | -1.87547433  | 0.060727498 |    | 0.099900785 |
| Gm17092   | 7.477776059 | -0.305671937 | 0.749393331 | -0.407892523 | 0.683352582 |    | 0.754032027 |
| Hyls1     | 40.17834693 | -0.305796131 | 0.504667986 | -0.605935266 | 0.54455774  |    | 0.631021067 |
| Olfr1440  | 1.157939263 | -0.305952224 | 1.938383407 | -0.157838858 | 0.874583778 | NA |             |
| Gm5735    | 0.172020343 | -0.306004743 | 3.640010574 | -0.084066993 | 0.933003168 | NA |             |
| Gm47217   | 0.171985285 | -0.30603718  | 3.640017179 | -0.084075752 | 0.932996204 | NA |             |
| Klhl25    | 262.3706623 | -0.30611424  | 0.226747031 | -1.350025351 | 0.177007851 |    | 0.250392879 |
| Prpf31    | 325.7494554 | -0.306499099 | 0.174293629 | -1.758521527 | 0.078658812 |    | 0.125418577 |
| Chchd6    | 60.84042066 | -0.306680479 | 0.309403753 | -0.991198316 | 0.321588753 |    | 0.412928    |
| Mef2d     | 829.1125554 | -0.306795837 | 0.214223622 | -1.432128886 | 0.152106939 |    | 0.220439859 |
| Proser1   | 301.5902983 | -0.307641375 | 0.193222998 | -1.592157137 | 0.111349401 |    | 0.169293195 |
| Eri1      | 248.7777925 | -0.307707093 | 0.208936649 | -1.472729149 | 0.140824083 |    | 0.206233912 |
| Mlec      | 2287.441714 | -0.307827274 | 0.138486846 | -2.222790701 | 0.026229916 |    | 0.047794743 |
| Slc34a2   | 26.95528529 | -0.308017264 | 0.617656966 | -0.498686619 | 0.618000173 |    | 0.6979574   |
| Abhd12    | 741.332475  | -0.308020911 | 0.137101396 | -2.246665024 | 0.024661443 |    | 0.045270624 |
| Nkiras2   | 295.697894  | -0.308230477 | 0.190172895 | -1.620790792 | 0.105062514 |    | 0.160983798 |
| Rnaseh1   | 183.0556612 | -0.30843621  | 0.239734607 | -1.286573575 | 0.198242959 |    | 0.275193059 |
| Ccdc60    | 6.504951963 | -0.308764211 | 0.797661009 | -0.387087005 | 0.698691798 |    | 0.76693695  |
| Gm19024   | 1.914694599 | -0.30878502  | 1.69590074  | -0.182077295 | 0.855522067 |    | 0.892900092 |
| R3hcc1    | 297.4074591 | -0.308865743 | 0.191640086 | -1.611696952 | 0.107027901 |    | 0.16351032  |
| Zbtb14    | 214.8635193 | -0.308920979 | 0.184162653 | -1.677435542 | 0.093457344 |    | 0.145742847 |
| Inhba     | 272.7237614 | -0.308988646 | 0.271401567 | -1.138492492 | 0.254914892 |    | 0.339780225 |
| Gm2004    | 12.62364432 | -0.309075444 | 1.061740422 | -0.291102644 | 0.770972818 |    | 0.826586038 |
| Gabra5    | 0.153758515 | -0.309554715 | 3.640690038 | -0.085026386 | 0.932240414 | NA |             |

|               |             |               |             |              |                |             |
|---------------|-------------|---------------|-------------|--------------|----------------|-------------|
| VglI4         | 513.5422642 | -0.309769899  | 0.246259906 | -1.257898226 | 0.208428565    | 0.287018593 |
| Ralbp1        | 579.3729696 | -0.309985149  | 0.120621819 | -2.56989284  | 0.010172998    | 0.020634059 |
| Mknk1         | 372.1770495 | -0.310087162  | 0.182651111 | -1.697702027 | 0.089564015    | 0.140675081 |
| Ptges3l       | 15.9389859  | -0.310119759  | 0.473588868 | -0.654829073 | 0.51257781     | 0.601612841 |
| Zbtb46        | 105.1926572 | -0.310125015  | 0.239028102 | -1.297441651 | 0.194479269    | 0.270850632 |
| Alg8          | 263.3267424 | -0.310215535  | 0.229908766 | -1.34929842  | 0.177241133    | 0.250672543 |
| Rpl36a-ps2    | 826.2956595 | -0.310369525  | 0.187481948 | -1.655463512 | 0.097830512    | 0.151523083 |
| Adcy4         | 70.66459736 | -0.31055061   | 0.374146177 | -0.830024812 | 0.406524756    | 0.49911919  |
| Jmjd7         | 65.96477466 | -0.310720089  | 0.276692087 | -1.122981481 | 0.26144536     | 0.346749688 |
| Gmcl1         | 303.6481334 | -0.310797468  | 0.214904342 | -1.446213071 | 0.148117449    | 0.215471138 |
| C4bp          | 11810.72355 | -0.310956595  | 0.351738456 | -0.884056291 | 0.376665827    | 0.468646841 |
| Gucy2c        | 3.510430786 | -0.310963546  | 1.758306273 | -0.176854027 | 0.85962305     | 0.895828214 |
| Ripk2         | 143.120482  | -0.311015269  | 0.207983246 | -1.495386168 | 0.134813688    | 0.198884022 |
| Sertad4       | 21.41583214 | -0.311135552  | 0.675756604 | -0.46042547  | 0.645210856    | 0.721393613 |
| Med31         | 82.21103457 | -0.311138325  | 0.218978533 | -1.42086222  | 0.155356818    | 0.224489154 |
| Zhx1          | 636.0192657 | -0.311316129  | 0.150790387 | -2.064562174 | 0.038964445    | 0.067823756 |
| Ppp2r3a       | 405.3787947 | -0.311469167  | 0.211526607 | -1.472482214 | 0.140890707    | 0.206313758 |
| Gm20604       | 87.16730365 | -0.311479749  | 0.285123816 | -1.092436801 | 0.274641155    | 0.361439124 |
| Scrib         | 884.9164127 | -0.31151583   | 0.271523518 | -1.147288576 | 0.251262374    | 0.33575176  |
| Poc1a         | 73.06001314 | -0.311950791  | 0.374938975 | -0.832004172 | 0.40540659     | 0.497973308 |
| Zfp526        | 70.83444665 | -0.311994043  | 0.298079024 | -1.046682315 | 0.295246123    | 0.384636703 |
| Tmod4         | 8.090398477 | -0.312020333  | 0.657739372 | -0.474382934 | 0.635226861    | 0.712926104 |
| Slc26a6       | 77.42349365 | -0.312276068  | 0.286044805 | -1.091703336 | 0.274963518    | 0.361835435 |
| Dhx34         | 243.8525362 | -0.312585172  | 0.186732059 | -1.673977006 | 0.094135118    | 0.146665646 |
| Tbc1d10b      | 281.4090633 | -0.312625026  | 0.189224786 | -1.652135706 | 0.098506889    | 0.152446029 |
| Arpc2         | 2541.09489  | -0.3132664576 | 0.167007764 | -1.872155933 | 0.061185034    | 0.100499321 |
| 9130401M01Rik | 332.0485477 | -0.312810531  | 0.258180074 | -1.211598273 | 0.225666196    | 0.307207323 |
| Gadd45a       | 425.1723417 | -0.313243539  | 0.294317935 | -1.064303265 | 0.287191339    | 0.375866571 |
| Dnaaf4        | 10.28175329 | -0.313295032  | 0.910987467 | -0.343907072 | 0.730916173    | 0.793672543 |
| Fbxo4         | 234.4354027 | -0.313295936  | 0.222042479 | -1.41097297  | 0.158252584    | 0.227727699 |
| Gli2          | 2.07571978  | -0.313526559  | 1.729233678 | -0.181309538 | 0.85612462     | 0.893329203 |
| Sec1          | 1.159785804 | -0.313536191  | 1.689403915 | -0.185589833 | 0.852766427 NA |             |
| Rpp38         | 77.15642275 | -0.313627248  | 0.258202456 | -1.214656333 | 0.224497194    | 0.305884603 |
| Gmfb          | 750.9650908 | -0.313827613  | 0.130965571 | -2.396260404 | 0.016563318    | 0.031792812 |
| Pced1b        | 82.5136009  | -0.313872379  | 0.361251877 | -0.868846362 | 0.384931171    | 0.477161816 |
| Riox1         | 119.9174275 | -0.313944096  | 0.264908171 | -1.185105369 | 0.235975788    | 0.318924627 |
| Rae1          | 490.1307744 | -0.313974619  | 0.132585524 | -2.368091246 | 0.017880126    | 0.034027727 |
| Olfr859       | 14.05467132 | -0.314098541  | 0.529570887 | -0.593118974 | 0.553101533    | 0.638446843 |
| Adsl          | 400.360087  | -0.314601682  | 0.159729406 | -1.969591516 | 0.048885205    | 0.082793063 |
| Steap4        | 1620.740561 | -0.31460354   | 0.186871842 | -1.683525651 | 0.092273378    | 0.144213105 |
| Paip2b        | 356.8080957 | -0.314832201  | 0.234168446 | -1.344468934 | 0.178796796    | 0.252600296 |
| Ddx18         | 387.7516934 | -0.315031186  | 0.182705316 | -1.72425846  | 0.084661195    | 0.13380032  |
| Serpina3h     | 5.29358412  | -0.315042118  | 0.885989013 | -0.355582421 | 0.722153311    | 0.786117192 |
| Mgat2         | 685.7736001 | -0.315043642  | 0.195794736 | -1.60905062  | 0.107605273    | 0.164289334 |
| Aktip         | 244.7353127 | -0.315115384  | 0.195892963 | -1.608610023 | 0.107701641    | 0.164421741 |
| Zfp146        | 417.490149  | -0.315328264  | 0.188886317 | -1.669407662 | 0.095036616    | 0.147881    |
| Fcer1a        | 5.808658305 | -0.315517093  | 0.867500008 | -0.363708461 | 0.716075724    | 0.780690602 |
| Ube2s         | 800.4770773 | -0.315797846  | 0.216463982 | -1.458893264 | 0.144594487    | 0.21109762  |
| Rapgef1l      | 25.00332899 | -0.315876658  | 0.717415036 | -0.440298352 | 0.659721034    | 0.734133433 |
| Cyth2         | 677.5372676 | -0.316325271  | 0.160533321 | -1.970464883 | 0.048785116    | 0.082672828 |
| Polr2h        | 184.6296724 | -0.316981586  | 0.176952684 | -1.791335286 | 0.073239507    | 0.117746804 |
| Gm13199       | 7.013223377 | -0.317161731  | 0.782157938 | -0.405495765 | 0.685113131    | 0.755681202 |
| Akap17b       | 99.97711363 | -0.31738694   | 0.252059672 | -1.259173817 | 0.207967556    | 0.286545777 |
| Cpne5         | 14.04276259 | -0.31758088   | 0.622603025 | -0.510085667 | 0.609991446    | 0.690996687 |
| Zfp352        | 0.163183986 | -0.317787489  | 3.642040667 | -0.087255338 | 0.930468554 NA |             |
| Olfr654       | 6.595675583 | -0.317853705  | 0.826745397 | -0.384463835 | 0.700634696    | 0.768574757 |
| Gsdmc4        | 0.524005696 | -0.318011071  | 2.539673124 | -0.125217323 | 0.900351503 NA |             |
| Gm8615        | 0.529503897 | -0.318053151  | 2.536162657 | -0.125407237 | 0.900201159 NA |             |
| Amz2          | 354.3966571 | -0.318123796  | 0.180073701 | -1.766631078 | 0.077290033    | 0.123432363 |
| Zfp113        | 214.1813279 | -0.318760877  | 0.199202216 | -1.60018741  | 0.109557014    | 0.166955214 |
| Ap1s1         | 680.9762612 | -0.31888615   | 0.185944817 | -1.714950467 | 0.086354309    | 0.136160586 |
| Rpl10a-ps1    | 2253.629611 | -0.319007119  | 0.162226622 | -1.966428908 | 0.049249087    | 0.083260456 |
| Gm14569       | 1.688829844 | -0.319045377  | 1.809396176 | -0.176326988 | 0.860037061    | 0.896150102 |
| Macf1         | 2110.836467 | -0.319209454  | 0.143304162 | -2.227496047 | 0.02591414     | 0.047279993 |
| Mkrn1         | 571.7601425 | -0.319247604  | 0.141577742 | -2.25492792  | 0.024137853    | 0.044409899 |
| Sh3glb1       | 1081.033992 | -0.319475597  | 0.200503558 | -1.593366224 | 0.111078058    | 0.168986145 |



|               |             |              |             |              |                |             |
|---------------|-------------|--------------|-------------|--------------|----------------|-------------|
| Hipk3         | 1564.805898 | -0.319740682 | 0.206179576 | -1.550787366 | 0.120952649    | 0.181546114 |
| Lpgat1        | 3157.203258 | -0.319771469 | 0.306160261 | -1.044457788 | 0.296273639    | 0.385710042 |
| Nup98         | 625.9706722 | -0.319965787 | 0.161680902 | -1.978995568 | 0.047816505    | 0.081249455 |
| Tor1b         | 829.7411929 | -0.320276698 | 0.210970804 | -1.518109102 | 0.128986897    | 0.191714788 |
| Gm16867       | 129.7233013 | -0.320664995 | 0.206685652 | -1.551462291 | 0.120790937    | 0.181344069 |
| Fam102a       | 558.7532316 | -0.321078023 | 0.198454272 | -1.617894242 | 0.105685391    | 0.161691156 |
| Trav6-3       | 0.148357795 | -0.321126034 | 3.642531001 | -0.088160138 | 0.9297494 NA   |             |
| Serinc4       | 4.286584943 | -0.32112713  | 0.908763262 | -0.353367201 | 0.723813172    | 0.787615175 |
| Wwp2          | 540.2976009 | -0.321347059 | 0.139166611 | -2.309081587 | 0.020939054    | 0.039149923 |
| Morc2a        | 684.8629016 | -0.321433778 | 0.193962955 | -1.657191593 | 0.097480746    | 0.151077432 |
| Zfp280c       | 199.0185807 | -0.321479108 | 0.251807509 | -1.276685947 | 0.201713145    | 0.279350584 |
| Gm21811       | 73.09196041 | -0.321488883 | 0.271270597 | -1.185122484 | 0.235969023    | 0.318924627 |
| Gm10499       | 21.336779   | -0.32151413  | 0.503327693 | -0.638776952 | 0.522968044    | 0.611265052 |
| Plxnc1        | 128.1717986 | -0.321529602 | 0.369483552 | -0.870213574 | 0.384183699    | 0.476331906 |
| Wdr44         | 74.51497695 | -0.321709561 | 0.268167384 | -1.199659543 | 0.230271592    | 0.312578238 |
| Dis3          | 264.8701654 | -0.321849198 | 0.198719222 | -1.619617844 | 0.105314394    | 0.161268283 |
| Tnrc6c        | 464.0626078 | -0.321910161 | 0.230058351 | -1.399254406 | 0.161736707    | 0.231880193 |
| Gm7463        | 105.0797178 | -0.32193892  | 0.449334727 | -0.716479054 | 0.473695597    | 0.564448349 |
| Xrn2          | 943.1270628 | -0.322094763 | 0.158670595 | -2.029958756 | 0.042360732    | 0.072977143 |
| Synrg         | 491.4303202 | -0.322099026 | 0.198966921 | -1.618857172 | 0.105477998    | 0.161446301 |
| Hnrnpul2      | 2127.230849 | -0.322111838 | 0.123089271 | -2.616896132 | 0.008873334    | 0.018230007 |
| Mtch1         | 1285.918021 | -0.322115536 | 0.158812639 | -2.028273932 | 0.042532298    | 0.073248875 |
| Bsg           | 8410.828842 | -0.322314871 | 0.166169783 | -1.939671978 | 0.052419567    | 0.087905644 |
| Brix1         | 522.9226827 | -0.322353676 | 0.164996479 | -1.953700327 | 0.050736668    | 0.085495573 |
| Fmn1          | 265.3594992 | -0.322557659 | 0.374798973 | -0.860615109 | 0.389450062    | 0.481880146 |
| Skint7        | 1.502906076 | -0.322617132 | 1.533554747 | -0.2103721   | 0.833377267 NA |             |
| Trappc9       | 302.0468782 | -0.323129132 | 0.216012815 | -1.495879451 | 0.134685072    | 0.198784849 |
| Tbc1d22a      | 363.5766267 | -0.323745813 | 0.155993905 | -2.075374758 | 0.037951816    | 0.066264088 |
| Exoc2         | 265.8141299 | -0.323759724 | 0.177743982 | -1.821494715 | 0.068531689    | 0.111110627 |
| Phf6          | 161.938984  | -0.323782129 | 0.231388244 | -1.399302417 | 0.161722315    | 0.231879061 |
| Flywch1       | 390.3967454 | -0.323812692 | 0.253897473 | -1.27536792  | 0.202179048    | 0.279950326 |
| Pomt2         | 380.91554   | -0.3247266   | 0.213526834 | -1.52077654  | 0.128315924    | 0.190800686 |
| Zdhhc20       | 321.1011948 | -0.325351339 | 0.281095049 | -1.157442436 | 0.247091645    | 0.331112904 |
| Gm17455       | 0.147105454 | -0.325448697 | 3.643131931 | -0.08933212  | 0.928817968 NA |             |
| Igfbp3        | 8.878862167 | -0.325640067 | 0.825756654 | -0.394353549 | 0.693320034    | 0.762660984 |
| Zfp623        | 339.541028  | -0.325659862 | 0.17259969  | -1.88679286  | 0.059188192    | 0.097642761 |
| Etaa1         | 126.8540513 | -0.325808237 | 0.257063703 | -1.26742217  | 0.205004377    | 0.283241317 |
| Eno3          | 142.1854776 | -0.325954074 | 0.356384898 | -0.914612477 | 0.360395106    | 0.452731248 |
| Dmtn          | 21.82880731 | -0.326222915 | 0.470937604 | -0.692709422 | 0.488491925    | 0.578480852 |
| Gm49274       | 13.28150686 | -0.326384526 | 0.579148721 | -0.56355909  | 0.573054235    | 0.656938552 |
| Smad5         | 581.1682578 | -0.326667061 | 0.167734776 | -1.947521375 | 0.051472226    | 0.086572522 |
| Ralgps1       | 183.1701747 | -0.327055184 | 0.275731566 | -1.186136174 | 0.235568527    | 0.318500456 |
| Sgms1         | 222.6447291 | -0.327126707 | 0.247331489 | -1.32262458  | 0.185960256    | 0.261017143 |
| Zfp213        | 142.5211637 | -0.327581408 | 0.245862052 | -1.332378892 | 0.182735715    | 0.257227187 |
| Ints14        | 255.1885111 | -0.328122627 | 0.182244595 | -1.8004519   | 0.071789312    | 0.115666212 |
| Parp4         | 509.3748767 | -0.328230865 | 0.192385555 | -1.706109719 | 0.087987653    | 0.13847983  |
| Zfp940        | 19.73642713 | -0.328541596 | 0.450303887 | -0.729599734 | 0.465634885    | 0.556126707 |
| Sh2b3         | 487.8519535 | -0.328787814 | 0.191357369 | -1.718187371 | 0.085762444    | 0.135365073 |
| Pip4k2c       | 515.2480122 | -0.328862786 | 0.140238206 | -2.345029901 | 0.019025554    | 0.035954732 |
| Efcab8        | 2.981726733 | -0.329039123 | 1.259195246 | -0.261309057 | 0.793854183    | 0.844848374 |
| Fev           | 0.15369777  | -0.329851184 | 3.643712452 | -0.090526129 | 0.927869131 NA |             |
| Cdipt         | 954.8294198 | -0.33006673  | 0.222981333 | -1.480243773 | 0.138808203    | 0.203754282 |
| Zfp882        | 30.14929205 | -0.330238833 | 0.400040438 | -0.825513627 | 0.409080005    | 0.501545968 |
| Nelfb         | 586.8214104 | -0.330490089 | 0.168701476 | -1.959023103 | 0.050110081    | 0.084539996 |
| Dnaaf2        | 39.94740304 | -0.33056043  | 0.364556367 | -0.906747105 | 0.364540547    | 0.45686152  |
| Plekhg3       | 1265.637975 | -0.33066432  | 0.211937403 | -1.560198037 | 0.118713089    | 0.17875117  |
| Tmod3         | 461.9927294 | -0.330756689 | 0.161369813 | -2.049681313 | 0.04039554     | 0.070014555 |
| Plekhf2       | 280.2818641 | -0.330947515 | 0.223855593 | -1.478397348 | 0.139301455    | 0.204249695 |
| Gm29036       | 0.530150097 | -0.331103982 | 2.535881084 | -0.13056763  | 0.896117351 NA |             |
| 2810039B14Rik | 23.90437464 | -0.331121973 | 0.447201739 | -0.74043087  | 0.459038593    | 0.54962679  |
| Dtymk         | 483.3541122 | -0.331178332 | 0.169686734 | -1.951704325 | 0.050973319    | 0.085812038 |
| Ccdc180       | 3.058104319 | -0.331255568 | 1.157593651 | -0.286158763 | 0.774756526    | 0.829609924 |
| Vsig4         | 186.1059229 | -0.331850635 | 0.864423901 | -0.383898033 | 0.701054024    | 0.768836861 |
| Tfcp2         | 271.6803301 | -0.331919103 | 0.203284083 | -1.632784514 | 0.102514325    | 0.157660281 |
| Pias1         | 417.1208717 | -0.332027868 | 0.126384598 | -2.627122871 | 0.008611023    | 0.017759585 |
| 4931414P19Rik | 76.75899358 | -0.332307555 | 0.416444594 | -0.797963425 | 0.424891715    | 0.516796939 |

|               |              |              |             |              |                |             |
|---------------|--------------|--------------|-------------|--------------|----------------|-------------|
| Ktn1          | 620.9276162  | -0.332345219 | 0.172908784 | -1.922084071 | 0.05459518     | 0.090945733 |
| Mllt1         | 438.9685239  | -0.332375103 | 0.152892207 | -2.173917882 | 0.029711303    | 0.053328942 |
| Gm48592       | 2.949901072  | -0.332513677 | 1.07884435  | -0.308212836 | 0.757920386    | 0.815721385 |
| Acrbp         | 154.4916389  | -0.332550819 | 0.289228188 | -1.149787031 | 0.250231598    | 0.334584179 |
| Vmn1r29       | 0.61886188   | -0.332931326 | 2.841828796 | -0.1171539   | 0.906738098 NA |             |
| Tafa1         | 1.154363657  | -0.333137053 | 1.730123562 | -0.192551018 | 0.847310609 NA |             |
| Syn3          | 18.17448729  | -0.333676553 | 0.544918427 | -0.612342209 | 0.540311369    | 0.627339659 |
| Gm2387        | 0.974970909  | -0.333807552 | 1.784662817 | -0.187042364 | 0.851627417 NA |             |
| Ccdc146       | 1.350914819  | -0.334186928 | 1.642007959 | -0.20352333  | 0.838726012 NA |             |
| Add3          | 210.9761803  | -0.334205319 | 0.353681299 | -0.944933532 | 0.344692811    | 0.436933827 |
| Pigc          | 278.4265233  | -0.334318915 | 0.174781731 | -1.912779523 | 0.055776284    | 0.092650695 |
| Chpf2         | 759.4352652  | -0.334375539 | 0.224475605 | -1.489585198 | 0.136333336    | 0.200761054 |
| Rnf216        | 414.8256929  | -0.334917155 | 0.19945791  | -1.67913699  | 0.093125349    | 0.145278271 |
| Ncald         | 362.86967    | -0.335046183 | 0.357719393 | -0.936617331 | 0.348955434    | 0.441418137 |
| Naf1          | 119.8391465  | -0.335084728 | 0.255113675 | -1.313472229 | 0.189023873    | 0.264591935 |
| Mtdh          | 1179.940291  | -0.335277096 | 0.200350184 | -1.673455394 | 0.094237681    | 0.14679828  |
| Gm15539       | 2.569924696  | -0.335299442 | 1.473112563 | -0.227612913 | 0.81994718     | 0.86553929  |
| Tm9sf4        | 1041.732125  | -0.335345901 | 0.168938256 | -1.985020501 | 0.047142191    | 0.080255649 |
| Cd5l          | 513.9676965  | -0.335352359 | 1.00392742  | -0.334040442 | 0.738349042    | 0.799706128 |
| Lsm8          | 206.2046093  | -0.335447685 | 0.232974224 | -1.439848918 | 0.149910148    | 0.217781696 |
| Fzr1          | 385.6395147  | -0.335552292 | 0.164684719 | -2.037543577 | 0.0415956      | 0.071835485 |
| Susd6         | 1177.893146  | -0.335889076 | 0.207294179 | -1.620349772 | 0.105157163    | 0.161099866 |
| Jph4          | 5.052389915  | -0.336229103 | 1.002238823 | -0.335478027 | 0.737264517    | 0.79873691  |
| H2-Q5         | 151.5707052  | -0.336370561 | 0.273333835 | -1.230621745 | 0.218464369    | 0.298858976 |
| Tgfbr3        | 129.4558635  | -0.336520455 | 0.323405045 | -1.040554131 | 0.298082529    | 0.387703039 |
| Rplp1         | 9292.414777  | -0.336748556 | 0.158922378 | -2.118949897 | 0.034094701    | 0.060251526 |
| Rpl14         | 4381.834756  | -0.336754193 | 0.139041777 | -2.42196411  | 0.015436875    | 0.029888455 |
| Fbxw5         | 803.0050376  | -0.336802665 | 0.183795318 | -1.832487734 | 0.066878788    | 0.108699549 |
| Irf1          | 746.6153406  | -0.336868802 | 0.225135702 | -1.496292232 | 0.134577518    | 0.198665405 |
| AY074887      | 0.961596586  | -0.336878672 | 2.588406959 | -0.130149037 | 0.896448514 NA |             |
| Ifi47         | 614.1740134  | -0.337331414 | 0.281936522 | -1.196480012 | 0.231509294    | 0.313908411 |
| Kat6b         | 441.9357312  | -0.337348521 | 0.184827152 | -1.825210832 | 0.06796922     | 0.110345611 |
| Naglu         | 637.2589001  | -0.337695056 | 0.191513112 | -1.763299925 | 0.077849918    | 0.124221771 |
| Myo9a         | 106.7866447  | -0.337742649 | 0.488014485 | -0.69207505  | 0.488890199    | 0.578747299 |
| Ston2         | 292.703364   | -0.337990218 | 0.251891793 | -1.341807188 | 0.179658521    | 0.253586559 |
| Sh3bgrl       | 2325.55915   | -0.338048426 | 0.298910374 | -1.130935745 | 0.258082137    | 0.343116608 |
| Gm13259       | 0.536434461  | -0.338125473 | 2.532246586 | -0.133527862 | 0.893775931 NA |             |
| 2310022A10Rik | 160.8792303  | -0.338158304 | 0.241119916 | -1.402448663 | 0.160781311    | 0.230778189 |
| Stn1          | 97.61021691  | -0.33910589  | 0.260341454 | -1.302542813 | 0.192730892    | 0.268833197 |
| Dst           | 1899.365494  | -0.339580967 | 0.20218785  | -1.679532015 | 0.093048405    | 0.145184807 |
| Cyrr1         | 88.32888059  | -0.339687598 | 0.33310664  | -1.019756308 | 0.30784405     | 0.398369922 |
| Rrp15         | 166.206481   | -0.339902837 | 0.243027269 | -1.398620153 | 0.16192692     | 0.232074832 |
| Phldb3        | 262.0458811  | -0.340506658 | 0.206279294 | -1.650706926 | 0.098798433    | 0.152827846 |
| Far2          | 9.612194569  | -0.34067116  | 0.716717545 | -0.475321363 | 0.634557934    | 0.712554049 |
| Gm18451       | 0.6444747569 | -0.340848344 | 3.520469088 | -0.096819013 | 0.922870124 NA |             |
| 1700073E17Rik | 5.543869255  | -0.340888242 | 0.852714979 | -0.399768095 | 0.689327332    | 0.759150669 |
| 5730409E04Rik | 142.406176   | -0.340902853 | 0.27861241  | -1.223573828 | 0.221113038    | 0.301900934 |
| Tnks          | 673.2075405  | -0.341153852 | 0.145295693 | -2.347997009 | 0.018874673    | 0.035701256 |
| Zkscan17      | 411.0226247  | -0.341269355 | 0.15857137  | -2.152149876 | 0.031385552    | 0.056050795 |
| Anks1         | 393.1545581  | -0.341702816 | 0.177539091 | -1.924662418 | 0.054271605    | 0.090539971 |
| Nlrp9c        | 3.016766973  | -0.341734771 | 1.150429173 | -0.297049813 | 0.766428479    | 0.822386248 |
| Ccdc189       | 31.66098352  | -0.342199749 | 0.388925783 | -0.879858739 | 0.378935839    | 0.470933396 |
| Klhl18        | 185.5500723  | -0.342245791 | 0.206529392 | -1.657128737 | 0.09749345     | 0.151083387 |
| Ubald2        | 658.900225   | -0.342332548 | 0.12494341  | -2.739900789 | 0.006145773    | 0.013090098 |
| Vamp3         | 298.5839987  | -0.342487889 | 0.164724837 | -2.079151488 | 0.037603429    | 0.065716377 |
| Dhx58         | 289.9693624  | -0.342501551 | 0.251173802 | -1.363603798 | 0.172692296    | 0.245154323 |
| Dnpep         | 925.3434658  | -0.342506058 | 0.26201213  | -1.307214511 | 0.191139869    | 0.266985046 |
| Poc5          | 113.6798599  | -0.342608017 | 0.22488694  | -1.523467823 | 0.127641705    | 0.18996384  |
| Spred2        | 299.0793641  | -0.342808822 | 0.219687795 | -1.560436357 | 0.118656799    | 0.178697977 |
| Med30         | 172.5853344  | -0.342966896 | 0.20486424  | -1.674117922 | 0.094107426    | 0.146635902 |
| Mcf2          | 0.656918075  | -0.343340017 | 2.481280297 | -0.138372121 | 0.88994633 NA  |             |
| Sesn1         | 322.8343744  | -0.343340864 | 0.20822502  | -1.648893411 | 0.099169473    | 0.153290523 |
| Cldn34c1      | 47.28912105  | -0.343501011 | 0.425663781 | -0.806977306 | 0.419679558    | 0.511597934 |
| Ralgapb       | 509.1730137  | -0.343539069 | 0.21769036  | -1.578108784 | 0.114540621    | 0.173510618 |
| Mettl25       | 45.7538174   | -0.343882589 | 0.35887297  | -0.958229286 | 0.337947153    | 0.430107192 |
| Xpo4          | 253.4975002  | -0.344477241 | 0.176210474 | -1.95491921  | 0.050592607    | 0.085286538 |

|               |             |              |             |              |                |             |
|---------------|-------------|--------------|-------------|--------------|----------------|-------------|
| Rpl23a        | 6632.108175 | -0.344565244 | 0.140688251 | -2.449140144 | 0.014319772    | 0.027925357 |
| Bnip2         | 900.956071  | -0.344629341 | 0.146133021 | -2.358326254 | 0.018357551    | 0.034831135 |
| Hus1          | 139.6515443 | -0.344798697 | 0.276276308 | -1.248021229 | 0.212023283    | 0.291215995 |
| Commmd3       | 1147.99878  | -0.344860791 | 0.145792917 | -2.36541527  | 0.018009864    | 0.034242945 |
| Fam76b        | 318.6967104 | -0.345103307 | 0.236165161 | -1.461279492 | 0.143938755    | 0.210217416 |
| Gm11847       | 6.663312327 | -0.345589409 | 1.499962341 | -0.230398724 | 0.817781953    | 0.863895571 |
| Ccng2         | 415.2438126 | -0.345611245 | 0.19938559  | -1.733381255 | 0.083027927    | 0.13151167  |
| Pcdhb14       | 13.02209001 | -0.345793873 | 0.527037296 | -0.656108923 | 0.511754044    | 0.601018389 |
| Gm6627        | 4.284277683 | -0.345917429 | 0.997774883 | -0.346688853 | 0.728825086    | 0.792057759 |
| N6amt1        | 279.3692152 | -0.346058122 | 0.245531356 | -1.409425365 | 0.158709428    | 0.228250239 |
| Top2b         | 1014.544395 | -0.34682068  | 0.157079788 | -2.207926842 | 0.027249373    | 0.049462023 |
| Tmtc3         | 225.0607942 | -0.347528534 | 0.246099757 | -1.412144966 | 0.157907281    | 0.227403559 |
| Sft2d2        | 1044.208711 | -0.347634136 | 0.130590829 | -2.662010325 | 0.00776755     | 0.016190084 |
| Skap2         | 575.5491163 | -0.347737015 | 0.18111763  | -1.919951224 | 0.054864061    | 0.091322252 |
| Cnih4         | 288.8204457 | -0.347742559 | 0.214774633 | -1.619104425 | 0.105424797    | 0.16141903  |
| Galnt16       | 6.505291762 | -0.347761643 | 0.725550832 | -0.479307069 | 0.631720194    | 0.71011248  |
| Uhmk1         | 924.4368001 | -0.34790488  | 0.188543564 | -1.845222782 | 0.065005138    | 0.106038426 |
| Clec1a        | 27.22375395 | -0.348126471 | 0.3799694   | -0.91619607  | 0.359564066    | 0.451920392 |
| Zfp275        | 332.7365254 | -0.348502621 | 0.292464388 | -1.191607028 | 0.233415368    | 0.316191116 |
| Ncoa3         | 613.9062287 | -0.349069718 | 0.258968911 | -1.347921329 | 0.177683687    | 0.251215085 |
| Fam53c        | 467.4953773 | -0.349232212 | 0.138293898 | -2.525290106 | 0.011560281    | 0.023136849 |
| Iglc3         | 12.53913535 | -0.349580912 | 0.791485275 | -0.441677089 | 0.658722891    | 0.733501492 |
| Ywhab         | 2579.388957 | -0.349877357 | 0.146888516 | -2.381924517 | 0.017222427    | 0.032897966 |
| Olfr655       | 0.53735634  | -0.349979646 | 2.531650799 | -0.138241675 | 0.89004942 NA  |             |
| Adgrl1        | 156.7357409 | -0.350035519 | 0.268746377 | -1.302542284 | 0.192731073    | 0.268833197 |
| Gm15191       | 1.174079015 | -0.350301358 | 1.76227271  | -0.198778178 | 0.842436267 NA |             |
| Pou2f3        | 1.162642864 | -0.350588118 | 1.933819815 | -0.181293063 | 0.856137551 NA |             |
| Mroh6         | 31.12286341 | -0.350724224 | 0.535078671 | -0.655462911 | 0.512169758    | 0.601383085 |
| Trim5         | 54.90810143 | -0.351028461 | 0.336276777 | -1.043867686 | 0.29654661     | 0.385983727 |
| Eif1ax        | 692.9589813 | -0.351551237 | 0.238399307 | -1.474631956 | 0.140311519    | 0.205606908 |
| Ptov1         | 1059.532672 | -0.351603351 | 0.1945863   | -1.806927575 | 0.070773572    | 0.114213164 |
| Mbd5          | 212.8415136 | -0.351624888 | 0.260305826 | -1.350814513 | 0.176754858    | 0.25008854  |
| Tmem44        | 62.53090601 | -0.351901019 | 0.359429319 | -0.979054852 | 0.327552878    | 0.419259814 |
| Olfr427       | 0.536348625 | -0.352022664 | 2.532890605 | -0.138980603 | 0.889465477 NA |             |
| Tomm20        | 1242.515776 | -0.352035671 | 0.194541434 | -1.809566544 | 0.070363032    | 0.113669001 |
| Cilp2         | 0.636992403 | -0.352415884 | 2.484189819 | -0.141863509 | 0.887187819 NA |             |
| lqcn          | 0.537356991 | -0.352449313 | 2.531753543 | -0.139211541 | 0.889282989 NA |             |
| Ncor2         | 1192.719587 | -0.352535101 | 0.200952521 | -1.754320375 | 0.079375626    | 0.126360601 |
| Gm12751       | 58.69756391 | -0.352606495 | 0.381566213 | -0.924103034 | 0.355432674    | 0.447811503 |
| Rbm45         | 202.772132  | -0.352741384 | 0.209694225 | -1.682170235 | 0.092535834    | 0.144490832 |
| 4933427D14Rik | 135.5585781 | -0.352831598 | 0.224567229 | -1.571162452 | 0.116144919    | 0.175613178 |
| Stk32a        | 0.551039862 | -0.353139888 | 2.563456771 | -0.137759252 | 0.890430689 NA |             |
| Smok3b        | 0.183970945 | -0.353174148 | 3.639986182 | -0.097026233 | 0.922705562 NA |             |
| Fkrp          | 306.7786793 | -0.353420682 | 0.175789666 | -2.010474736 | 0.044380968    | 0.076040878 |
| Olfr1414      | 0.551974504 | -0.353490675 | 2.562402085 | -0.137952852 | 0.89027768 NA  |             |
| Rit1          | 262.5012786 | -0.353604897 | 0.196778956 | -1.796964999 | 0.072341177    | 0.116456315 |
| Pum2          | 1432.344226 | -0.35425317  | 0.166483735 | -2.127854538 | 0.033349146    | 0.05909861  |
| Tmem104       | 225.2142532 | -0.354270092 | 0.328518647 | -1.078386554 | 0.280861285    | 0.368458883 |
| Elp2          | 827.4466905 | -0.354840424 | 0.115495427 | -3.072333105 | 0.002123926    | 0.004997058 |
| Ptpro         | 37.78697001 | -0.354918846 | 0.408713628 | -0.868380259 | 0.385186198    | 0.477401258 |
| Timm8a2       | 0.554893238 | -0.354986513 | 2.560810156 | -0.138622737 | 0.889748275 NA |             |
| Gm527         | 27.97978626 | -0.355124311 | 0.419006893 | -0.847538113 | 0.396695253    | 0.48945941  |
| Rpl31-ps16    | 0.560813512 | -0.355166199 | 3.005688195 | -0.118164685 | 0.905937171 NA |             |
| Gm6139        | 0.96049946  | -0.355456237 | 2.578938057 | -0.137830467 | 0.890374405 NA |             |
| Ess2          | 204.5560441 | -0.355607117 | 0.181384679 | -1.960513529 | 0.049935798    | 0.084279328 |
| Dennd2c       | 22.49393087 | -0.355669052 | 0.428591192 | -0.829856184 | 0.4066201      | 0.499140227 |
| Arap3         | 299.7401044 | -0.355722362 | 0.193913759 | -1.834435905 | 0.066589314    | 0.108291007 |
| Tnfsf10       | 83.238534   | -0.355742898 | 0.400968017 | -0.887210158 | 0.374965764    | 0.467042913 |
| Dda1          | 379.9811142 | -0.355753896 | 0.180797103 | -1.96769688  | 0.049102925    | 0.083095758 |
| Myb           | 3.838364046 | -0.355902272 | 0.936551764 | -0.380013455 | 0.703935427    | 0.770707801 |
| Atf7ip        | 557.1432786 | -0.355977938 | 0.130620527 | -2.725283284 | 0.006424634    | 0.013627866 |
| Poli          | 169.8396437 | -0.356429415 | 0.286123944 | -1.245716841 | 0.212868369    | 0.292282535 |
| BC107364      | 5.825646473 | -0.356489879 | 0.949729766 | -0.375359277 | 0.707393287    | 0.773698643 |
| Olfr699       | 1.682941619 | -0.356790043 | 1.571296672 | -0.227067268 | 0.820371435    | 0.865772702 |
| Nr2c2         | 656.3264112 | -0.356854693 | 0.151319447 | -2.358287055 | 0.01835949     | 0.034831135 |
| Nsmc1         | 284.6744177 | -0.356937745 | 0.193573757 | -1.843936655 | 0.065192372    | 0.106282831 |



|               |             |              |             |              |                |             |
|---------------|-------------|--------------|-------------|--------------|----------------|-------------|
| Olf397        | 1.939671645 | -0.357183556 | 1.373213382 | -0.260107832 | 0.794780597    | 0.845390311 |
| Slc44a5       | 2.647776664 | -0.357597305 | 1.371104927 | -0.260809584 | 0.794239354    | 0.845152768 |
| Hspa4l        | 323.4555048 | -0.357858835 | 0.290863828 | -1.230331175 | 0.218573115    | 0.298983749 |
| Gm10557       | 20.39900059 | -0.357944197 | 0.437784839 | -0.817625841 | 0.413570868    | 0.505851352 |
| Zbtb38        | 279.599014  | -0.358374228 | 0.194345985 | -1.84400119  | 0.065182967    | 0.10627766  |
| Stard3nl      | 198.6822653 | -0.358405534 | 0.244206309 | -1.46763421  | 0.14220361     | 0.20799248  |
| Cdc23         | 405.1394295 | -0.358612224 | 0.157584054 | -2.27568853  | 0.022864658    | 0.042378419 |
| Stk35         | 348.3750716 | -0.359146083 | 0.221269836 | -1.623113613 | 0.10456512     | 0.160351369 |
| Zcchc4        | 177.8966937 | -0.359218417 | 0.260212291 | -1.380482127 | 0.167438249    | 0.238709422 |
| Trim80        | 10.04479    | -0.359225617 | 0.83730001  | -0.429028559 | 0.667902441    | 0.740771636 |
| Hecw2         | 51.24172721 | -0.359242127 | 0.532691118 | -0.674391059 | 0.500062726    | 0.589562195 |
| Gm18194       | 14.38865115 | -0.359391575 | 0.526837749 | -0.682167471 | 0.495133061    | 0.585004396 |
| Rps20         | 3426.793219 | -0.359730517 | 0.165317896 | -2.175992592 | 0.029555814    | 0.053077797 |
| 4930526A20Rik | 1.501168606 | -0.360056378 | 1.409009703 | -0.255538608 | 0.798307128 NA |             |
| Sec22a        | 321.1420712 | -0.360118869 | 0.258305058 | -1.394161121 | 0.163268955    | 0.233725585 |
| Vps37b        | 413.1772248 | -0.360609016 | 0.195489682 | -1.84464475  | 0.065089233    | 0.10615529  |
| Ebf1          | 24.18927319 | -0.360611164 | 0.404350884 | -0.891827319 | 0.372485496    | 0.464734539 |
| Traf4         | 1064.856301 | -0.360962175 | 0.192692221 | -1.873257636 | 0.061032817    | 0.100268619 |
| Itm2a         | 9.214913157 | -0.361122412 | 0.739713081 | -0.488192546 | 0.625413464    | 0.704695885 |
| Cnpy4         | 123.470572  | -0.361221174 | 0.253864574 | -1.422889256 | 0.154768261    | 0.223733513 |
| Pcdhga4       | 9.822960344 | -0.361393193 | 0.808137146 | -0.447192898 | 0.654735788    | 0.729776772 |
| Polr3h        | 225.7367436 | -0.361437884 | 0.177260688 | -2.039018856 | 0.041448146    | 0.071620514 |
| Hcfc1         | 1137.728031 | -0.36148151  | 0.113195944 | -3.193413987 | 0.001406012    | 0.003443427 |
| Pml           | 460.4661782 | -0.362458906 | 0.254242387 | -1.425643102 | 0.153971388    | 0.222770451 |
| Rasgrf1       | 7.868856872 | -0.362634252 | 0.681936449 | -0.53177133  | 0.594884382    | 0.677551373 |
| St7           | 215.1095763 | -0.362665527 | 0.215878    | -1.679955932 | 0.09296589     | 0.145082616 |
| Mms19         | 757.6731434 | -0.362693708 | 0.153734712 | -2.359218055 | 0.018313491    | 0.034751603 |
| Rps6ka5       | 65.68869011 | -0.36280062  | 0.330124706 | -1.098980515 | 0.271776565    | 0.358360807 |
| Ilvbl         | 458.1364549 | -0.362906407 | 0.215828896 | -1.681454217 | 0.092674722    | 0.144681196 |
| Trappc4       | 287.1562083 | -0.362906461 | 0.166186916 | -2.183724626 | 0.028982489    | 0.052185623 |
| Syt11         | 90.91838679 | -0.36313534  | 0.30776801  | -1.179899564 | 0.238040163    | 0.32135799  |
| Samd4b        | 527.3787963 | -0.363598727 | 0.234246595 | -1.552204961 | 0.120613189    | 0.181120205 |
| Tcf7l1        | 156.7183966 | -0.36362533  | 0.301697316 | -1.20526538  | 0.22810087     | 0.310150234 |
| Pramel4       | 0.545364359 | -0.363660972 | 2.945398289 | -0.123467503 | 0.901736906 NA |             |
| Dync1li1      | 408.8732252 | -0.363691655 | 0.154243539 | -2.357905284 | 0.018378382    | 0.03485534  |
| Zfp219        | 712.5310096 | -0.36375576  | 0.282312303 | -1.288487099 | 0.197576457    | 0.274358241 |
| Pih1d2        | 16.80498514 | -0.363780664 | 0.51366239  | -0.708209654 | 0.478815072    | 0.569156279 |
| Mrps23        | 372.2486096 | -0.363785076 | 0.173024609 | -2.102504835 | 0.035509077    | 0.062382392 |
| Gm15387       | 507.6129559 | -0.363900361 | 0.222245711 | -1.637378557 | 0.101551396    | 0.156334495 |
| Phka1         | 184.9593139 | -0.363982998 | 0.260030219 | -1.399771916 | 0.16158163     | 0.231716322 |
| Gm6030        | 1.439073761 | -0.364466656 | 1.811377014 | -0.201209717 | 0.840534594 NA |             |
| Gm18752       | 0.54780973  | -0.364848329 | 2.525572739 | -0.14446162  | 0.885135962 NA |             |
| Myct1         | 50.42421216 | -0.364925004 | 0.350377492 | -1.04151954  | 0.297634489    | 0.387156476 |
| Olf35         | 0.546361542 | -0.365002198 | 2.943936987 | -0.123984378 | 0.901327644 NA |             |
| Dzip1         | 21.71510463 | -0.365162804 | 0.462701503 | -0.789197359 | 0.429996666    | 0.521675431 |
| Tsr1          | 368.5896455 | -0.365538881 | 0.257649361 | -1.41874554  | 0.155973215    | 0.225188971 |
| Gm5590        | 7.141127565 | -0.365867735 | 0.690754941 | -0.529663581 | 0.596345203    | 0.678970573 |
| Zfp518a       | 131.0452673 | -0.366407387 | 0.237119611 | -1.545242867 | 0.122287529    | 0.183243192 |
| Slc23a2       | 514.1380176 | -0.366658344 | 0.265496436 | -1.381029251 | 0.167269967    | 0.238489454 |
| Ccdc50        | 1274.102458 | -0.366786386 | 0.171702532 | -2.136173421 | 0.032665281    | 0.058041401 |
| Phyhip        | 1.923648165 | -0.367740385 | 1.481475204 | -0.248225811 | 0.803959697    | 0.853309885 |
| Gm13841       | 1.187685483 | -0.367876119 | 1.782172132 | -0.206420083 | 0.836462785 NA |             |
| Gm8210        | 1.187685483 | -0.367876119 | 1.782172132 | -0.206420083 | 0.836462785 NA |             |
| Klf11         | 272.6473325 | -0.367949037 | 0.219680717 | -1.67492642  | 0.093948669    | 0.146415295 |
| 4930444P10Rik | 1.577160257 | -0.368604063 | 1.817653672 | -0.202791142 | 0.839298282 NA |             |
| Gm19168       | 0.558817332 | -0.368849115 | 2.559359335 | -0.144117752 | 0.885407487 NA |             |
| Eif2s1        | 796.6241578 | -0.369439513 | 0.154343145 | -2.39362437  | 0.016682824    | 0.031981197 |
| Rbsn          | 258.4993148 | -0.369603098 | 0.168247124 | -2.196787023 | 0.02803566     | 0.050684193 |
| Daxx          | 325.631254  | -0.369724857 | 0.205093446 | -1.802714146 | 0.071433119    | 0.115135844 |
| Gm42372       | 4.242784815 | -0.369768055 | 0.886133189 | -0.417282706 | 0.676471637    | 0.747949099 |
| Rpgrip1l      | 86.77903648 | -0.369985162 | 0.303880815 | -1.217533797 | 0.223401185    | 0.304586005 |
| Usp1          | 369.0626705 | -0.369991992 | 0.23739739  | -1.558534374 | 0.119106626    | 0.179248743 |
| Pipp1         | 171.9699783 | -0.370149781 | 0.251912874 | -1.469356354 | 0.141736159    | 0.207409274 |
| Hoxc4         | 0.559450224 | -0.370484529 | 2.55851585  | -0.144804469 | 0.884865254 NA |             |
| Ccdc57        | 102.5697641 | -0.370507528 | 0.517603366 | -0.715813598 | 0.474106455    | 0.564858959 |
| Chchd4        | 242.0924771 | -0.370674372 | 0.193631201 | -1.914331832 | 0.05557777     | 0.092401971 |

|           |             |              |             |              |             |    |             |
|-----------|-------------|--------------|-------------|--------------|-------------|----|-------------|
| Capn9     | 0.561026978 | -0.370997208 | 2.275526263 | -0.163037981 | 0.87048853  | NA |             |
| Lrp11     | 46.24010946 | -0.371583412 | 0.428701583 | -0.86676473  | 0.386070931 |    | 0.478323926 |
| Amer2     | 11.08952995 | -0.371734807 | 0.78781117  | -0.471857751 | 0.637028326 |    | 0.714249414 |
| Pyroxd1   | 349.0427946 | -0.372106873 | 0.191771191 | -1.940368996 | 0.052334862 |    | 0.087806783 |
| Spef2     | 2.988981137 | -0.372128288 | 1.199196439 | -0.310314704 | 0.756321651 |    | 0.814309177 |
| Cic       | 978.2730012 | -0.372186122 | 0.231673431 | -1.606511891 | 0.108161484 |    | 0.165035083 |
| Tmem185a  | 325.5329074 | -0.372474602 | 0.170232601 | -2.18803332  | 0.028667175 |    | 0.051710719 |
| Peli3     | 25.55088987 | -0.372659883 | 0.518284001 | -0.719026408 | 0.472124649 |    | 0.562733763 |
| Mrs2      | 702.8686081 | -0.372745908 | 0.22636566  | -1.646653949 | 0.099629195 |    | 0.1539174   |
| Zscan25   | 113.9048302 | -0.373320204 | 0.229602822 | -1.625939088 | 0.103962614 |    | 0.159570959 |
| Anp32b    | 1060.309527 | -0.373615784 | 0.14126206  | -2.644841679 | 0.008172915 |    | 0.016946224 |
| U2surp    | 683.2899237 | -0.373773753 | 0.144815996 | -2.581025313 | 0.009850736 |    | 0.020023291 |
| Saxo2     | 18.85065971 | -0.373891829 | 0.564690127 | -0.662118588 | 0.507895224 |    | 0.597391871 |
| Atp6v0e   | 778.2079458 | -0.373911573 | 0.140489805 | -2.661485456 | 0.00777967  |    | 0.016209706 |
| Dock1     | 370.784038  | -0.374410242 | 0.304157735 | -1.230973928 | 0.218332616 |    | 0.298750657 |
| Snx4      | 685.1495911 | -0.374473627 | 0.151345312 | -2.474299483 | 0.013349774 |    | 0.026225736 |
| Eml5      | 281.8490558 | -0.374819871 | 0.359019478 | -1.044009849 | 0.296480833 |    | 0.385950308 |
| Foxk1     | 543.8929917 | -0.374923528 | 0.148595088 | -2.523121945 | 0.011631806 |    | 0.023247248 |
| Pex5l     | 3.136726838 | -0.375006313 | 1.427621052 | -0.26267917  | 0.792797873 |    | 0.843882251 |
| Rrs1      | 428.5395068 | -0.375203529 | 0.278154431 | -1.348903658 | 0.177367913 |    | 0.250810234 |
| Maz       | 1659.702226 | -0.375429219 | 0.129845971 | -2.891342851 | 0.003835994 |    | 0.008551853 |
| Angpt12   | 191.8888057 | -0.375481361 | 0.291106513 | -1.289841844 | 0.197105576 |    | 0.273837166 |
| Tri3      | 377.5896208 | -0.375986492 | 0.392615848 | -0.957644715 | 0.338241943 |    | 0.430420889 |
| Zfp395    | 617.4453528 | -0.375994255 | 0.291629411 | -1.289287848 | 0.197298034 |    | 0.274059878 |
| Amigo3    | 11.94331923 | -0.376044511 | 0.674202517 | -0.55776195  | 0.577006948 |    | 0.660587902 |
| Mmp9      | 20.60150985 | -0.376137146 | 0.737981309 | -0.509683838 | 0.610272978 |    | 0.691153506 |
| Rfwd3     | 492.2005131 | -0.376174151 | 0.204886863 | -1.836009127 | 0.066356307 |    | 0.107963573 |
| Terf2     | 294.9535608 | -0.376389467 | 0.152362949 | -2.470347743 | 0.013498177 |    | 0.026477611 |
| Eif4enif1 | 704.5113991 | -0.376438364 | 0.24194046  | -1.555913236 | 0.119728726 |    | 0.180027406 |
| Ddx21     | 823.5519928 | -0.376818278 | 0.221127539 | -1.704076659 | 0.088366767 |    | 0.138999505 |
| Rab11fip1 | 215.5010256 | -0.376888762 | 0.256127947 | -1.47148629  | 0.141159652 |    | 0.206818851 |
| Gtdc1     | 132.3676813 | -0.377338601 | 0.202870804 | -1.859994603 | 0.06288629  |    | 0.102956445 |
| Afdn      | 1688.939217 | -0.377367112 | 0.198229767 | -1.903685393 | 0.05695117  |    | 0.094399956 |
| Mettl4    | 63.74834072 | -0.378041353 | 0.265406537 | -1.424385989 | 0.154334768 |    | 0.223220423 |
| Klc1      | 511.2608872 | -0.378269333 | 0.186533764 | -2.027886663 | 0.042571817 |    | 0.073294721 |
| Cpsf6     | 932.8156541 | -0.378555882 | 0.177180462 | -2.136555447 | 0.032634167 |    | 0.057995129 |
| Poglut3   | 205.0264118 | -0.378557377 | 0.211173265 | -1.792638741 | 0.073030708 |    | 0.117444345 |
| Ube2i     | 1691.705509 | -0.378736436 | 0.152532187 | -2.482993545 | 0.013028345 |    | 0.02565341  |
| Mprp      | 4857.65258  | -0.378789564 | 0.207932287 | -1.821696713 | 0.068501017 |    | 0.111071461 |
| Olfr1262  | 2.182961725 | -0.37891307  | 1.251952645 | -0.302657669 | 0.76215076  |    | 0.818981794 |
| Clic4     | 1359.342568 | -0.37894945  | 0.179729945 | -2.10843802  | 0.034993119 |    | 0.061634744 |
| Ctsf      | 429.4371347 | -0.379131666 | 0.267175438 | -1.419036381 | 0.15588841  |    | 0.22510466  |
| Pi4ka     | 708.6463192 | -0.379499969 | 0.170916107 | -2.220387393 | 0.026392482 |    | 0.048055007 |
| Zbtb6     | 200.23277   | -0.379561277 | 0.160464841 | -2.365385933 | 0.018011291 |    | 0.034242945 |
| Rest      | 530.0787932 | -0.380456453 | 0.170567118 | -2.23053809  | 0.025711742 |    | 0.046927351 |
| Ccdc166   | 70.8237136  | -0.380619843 | 0.261803517 | -1.453837775 | 0.145991288 |    | 0.212886791 |
| Chst13    | 85.54054495 | -0.380665689 | 0.38623102  | -0.985590668 | 0.324334019 |    | 0.415616865 |
| Plin3     | 1036.732369 | -0.380710332 | 0.198735706 | -1.915661457 | 0.055408201 |    | 0.092147012 |
| Zer1      | 697.7246842 | -0.380711218 | 0.188764906 | -2.016853797 | 0.043710773 |    | 0.075058547 |
| Gpaa1     | 539.4046778 | -0.3808757   | 0.157444588 | -2.419109502 | 0.015558556 |    | 0.030096705 |
| Cc2d1b    | 397.36452   | -0.380980227 | 0.189966665 | -2.005510956 | 0.044908451 |    | 0.076864564 |
| P2rx1     | 2.896658715 | -0.381248209 | 1.29319883  | -0.294810203 | 0.768138872 |    | 0.823962215 |
| Ercc4     | 200.1204588 | -0.381258706 | 0.25718092  | -1.482453309 | 0.138219718 |    | 0.203047804 |
| Olfr1123  | 1.70126771  | -0.381341474 | 1.596508016 | -0.238859731 | 0.811214352 |    | 0.858980266 |
| Anapc10   | 112.8447256 | -0.381396957 | 0.214485458 | -1.778194947 | 0.075371843 |    | 0.120696898 |
| Flt4      | 283.0270952 | -0.381574285 | 0.288345757 | -1.323322002 | 0.185728318 |    | 0.26075075  |
| Lmbr1     | 127.6967083 | -0.381762407 | 0.287085532 | -1.329786298 | 0.183588692 |    | 0.258150777 |
| Adarb2    | 5.685289377 | -0.382465753 | 0.866700227 | -0.44128955  | 0.65900339  |    | 0.733717986 |
| Gm14419   | 20.1915081  | -0.382488861 | 0.729576992 | -0.524261134 | 0.600096925 |    | 0.682030159 |
| Copg1     | 2080.864912 | -0.38265242  | 0.117301038 | -3.262140109 | 0.001105745 |    | 0.002766066 |
| Kif28     | 0.982980914 | -0.382676148 | 2.58371591  | -0.148110768 | 0.882255351 | NA |             |
| Cnot9     | 444.4621213 | -0.382951689 | 0.174623394 | -2.193014811 | 0.028306312 |    | 0.05114095  |
| Strn      | 393.9961906 | -0.383264992 | 0.150618636 | -2.544605377 | 0.01094013  |    | 0.022001573 |
| Rce1      | 199.5989467 | -0.383342333 | 0.232462445 | -1.649050595 | 0.09913727  |    | 0.153268539 |
| Tifa      | 349.8207029 | -0.383372499 | 0.149608487 | -2.562505025 | 0.010392008 |    | 0.021018265 |
| Nrbp2     | 2275.816601 | -0.384029333 | 0.434476679 | -0.883889404 | 0.376755918 |    | 0.468716145 |

|            |             |              |             |              |             |             |
|------------|-------------|--------------|-------------|--------------|-------------|-------------|
| Zfp444     | 545.8706303 | -0.384530882 | 0.204807517 | -1.877523288 | 0.060446409 | 0.099487389 |
| Arglu1     | 1260.734141 | -0.384631847 | 0.198237042 | -1.940262241 | 0.052347828 | 0.087811253 |
| Trim25     | 1469.159174 | -0.384724071 | 0.17399535  | -2.211116973 | 0.027027738 | 0.04909108  |
| Alpl       | 388.2090711 | -0.384850302 | 0.343649513 | -1.119891889 | 0.262759835 | 0.3481139   |
| Map3k8     | 67.02348658 | -0.385303614 | 0.269991445 | -1.42709564  | 0.153552329 | 0.222239588 |
| Sac3d1     | 140.0414141 | -0.385457894 | 0.22894014  | -1.683662349 | 0.092246942 | 0.144198227 |
| Zfp160     | 217.0074312 | -0.385578518 | 0.237972947 | -1.620261977 | 0.105176013 | 0.161114266 |
| Olfr806    | 2.413118188 | -0.385718302 | 1.84707714  | -0.208826309 | 0.834583832 | 0.876959079 |
| Zranb3     | 106.891473  | -0.386122383 | 0.324619099 | -1.189462925 | 0.234257552 | 0.31702967  |
| Plod3      | 662.9089114 | -0.386138514 | 0.154955517 | -2.491931364 | 0.012705059 | 0.025112561 |
| Iffo2      | 329.9760474 | -0.3861749   | 0.191703647 | -2.014436894 | 0.043963684 | 0.075409285 |
| Gzf1       | 963.3667882 | -0.386267021 | 0.229491754 | -1.683141174 | 0.092347765 | 0.144302906 |
| Rpl8       | 6978.534642 | -0.386395556 | 0.167620583 | -2.305179643 | 0.021156514 | 0.039508846 |
| Hmgxb3     | 369.6928736 | -0.386737098 | 0.164726198 | -2.347757082 | 0.018886834 | 0.035716334 |
| Zfp11      | 45.09551001 | -0.386837055 | 0.33678435  | -1.14861945  | 0.250712933 | 0.335175195 |
| Sox8       | 0.569187977 | -0.38712601  | 2.272464941 | -0.170355108 | 0.864730875 | NA          |
| Stard3     | 388.5085532 | -0.38748541  | 0.170945034 | -2.266725163 | 0.02340702  | 0.043242618 |
| Rpl30      | 3947.51297  | -0.387663398 | 0.12021838  | -3.224659973 | 0.001261224 | 0.003120659 |
| Sec23ip    | 522.6543713 | -0.38770061  | 0.150654063 | -2.573449405 | 0.010069037 | 0.020430485 |
| Ikbke      | 705.774195  | -0.387811577 | 0.189234695 | -2.049368252 | 0.040426119 | 0.070053312 |
| Gm47356    | 25.37474446 | -0.388123763 | 0.519414593 | -0.747233074 | 0.454922883 | 0.545779403 |
| Nek3       | 51.52472332 | -0.388200511 | 0.348763409 | -1.113076949 | 0.265675383 | 0.351539423 |
| Insm1      | 1.129327232 | -0.388610844 | 1.790846093 | -0.21699846  | 0.828209545 | NA          |
| Gm8643     | 0.56982221  | -0.388614654 | 2.554530837 | -0.152127604 | 0.879086293 | NA          |
| Zc3h12c    | 124.9281939 | -0.388928254 | 0.289888469 | -1.341647896 | 0.179710189 | 0.253617492 |
| Atp1a1     | 6196.052544 | -0.388953679 | 0.184082445 | -2.112931954 | 0.034606592 | 0.061054868 |
| Fbxw27     | 0.569737805 | -0.389028987 | 2.554262238 | -0.152305813 | 0.87894574  | NA          |
| Fam219a    | 149.4393568 | -0.389363494 | 0.213675839 | -1.822215814 | 0.068422246 | 0.110964845 |
| Gm10420    | 4.658364137 | -0.389950452 | 0.893333545 | -0.436511597 | 0.662465587 | 0.736514499 |
| Hs3st6     | 30.24579045 | -0.39015821  | 0.394806093 | -0.988227427 | 0.323041278 | 0.414324986 |
| Ctu1       | 104.237556  | -0.390413261 | 0.252209791 | -1.547970278 | 0.121629453 | 0.182417428 |
| Olfr1420   | 0.553563833 | -0.39115645  | 2.522526725 | -0.155065334 | 0.876769811 | NA          |
| Ogfr       | 875.8708987 | -0.391162578 | 0.206811083 | -1.891400466 | 0.058570906 | 0.096776845 |
| Nip7       | 262.2983701 | -0.391233353 | 0.172099058 | -2.273303276 | 0.02300791  | 0.042597617 |
| Otop2      | 0.565082646 | -0.391747958 | 3.003433729 | -0.130433362 | 0.896223573 | NA          |
| Zfp106     | 1648.708047 | -0.391863396 | 0.267850432 | -1.462993336 | 0.143469203 | 0.209639407 |
| Gm14219    | 1.984596531 | -0.391980591 | 2.297077839 | -0.170643147 | 0.864504369 | 0.899815037 |
| Klc2       | 256.7593887 | -0.392123811 | 0.253752214 | -1.545302029 | 0.122273225 | 0.183237864 |
| Rela       | 988.135385  | -0.39232441  | 0.171723049 | -2.284634544 | 0.022334266 | 0.041476532 |
| Zbtb21     | 265.8397977 | -0.392451883 | 0.169943126 | -2.309313076 | 0.020926215 | 0.039130208 |
| Tab2       | 1701.661231 | -0.392504049 | 0.121819622 | -3.222010068 | 0.001272947 | 0.003147838 |
| Ptpru      | 17.05582585 | -0.392575101 | 0.80755434  | -0.486128402 | 0.626876131 | 0.075712526 |
| Hnrnpm     | 1815.928076 | -0.392803502 | 0.13703703  | -2.866404088 | 0.004151639 | 0.009193031 |
| Ergic1     | 1654.027516 | -0.392943947 | 0.166922921 | -2.354044272 | 0.018570399 | 0.035180372 |
| Olfr102    | 5.364784895 | -0.393078873 | 0.844225244 | -0.465609002 | 0.641495398 | 0.718546361 |
| Zswim4     | 253.3598599 | -0.3932603   | 0.237248374 | -1.657589026 | 0.097400446 | 0.150980433 |
| Rps29      | 5370.391174 | -0.393269125 | 0.142188743 | -2.765824608 | 0.005677906 | 0.012206425 |
| Rpl15-ps3  | 2152.480656 | -0.393437429 | 0.141549264 | -2.779508818 | 0.005444118 | 0.011749755 |
| Myo18a     | 2352.748938 | -0.393579194 | 0.227520543 | -1.729862233 | 0.083654892 | 0.132418626 |
| Bod1l      | 444.6403187 | -0.393731358 | 0.178524706 | -2.205472664 | 0.027420944 | 0.049734202 |
| Diaph1     | 1509.489301 | -0.39421508  | 0.120596217 | -3.268884299 | 0.001079724 | 0.002704546 |
| Gm6863     | 6.895222909 | -0.394391478 | 1.434161874 | -0.274997882 | 0.783317865 | 0.836245222 |
| E2f5       | 181.1675714 | -0.39462254  | 0.245479094 | -1.607560685 | 0.107931429 | 0.164743038 |
| Tmem176a   | 5678.695729 | -0.394810875 | 0.193858289 | -2.036595276 | 0.041690617 | 0.071951977 |
| Bok        | 297.4344853 | -0.395078229 | 0.214385258 | -1.842842336 | 0.065352034 | 0.106482029 |
| Gm29516    | 0.576678494 | -0.39542482  | 2.270324481 | -0.17417106  | 0.861731029 | NA          |
| Crif3      | 220.3439867 | -0.395705917 | 0.190976015 | -2.072018929 | 0.038263676 | 0.066753904 |
| Prob1      | 328.7398874 | -0.395783119 | 0.302572601 | -1.308060011 | 0.190852955 | 0.26669354  |
| Snrpd1     | 373.7926881 | -0.395806736 | 0.234158402 | -1.690337534 | 0.090963398 | 0.142484162 |
| Gm45038    | 5.92383433  | -0.395833766 | 1.032193625 | -0.3834879   | 0.70135804  | 0.769021859 |
| Pfas       | 289.2540525 | -0.396744835 | 0.196791534 | -2.016066583 | 0.043793014 | 0.075177052 |
| Hmgbl1-ps2 | 1.451136827 | -0.396750746 | 2.407902782 | -0.164770251 | 0.86912482  | NA          |
| Commd10    | 205.0212089 | -0.396928412 | 0.235224416 | -1.687445628 | 0.091517697 | 0.14321587  |
| Coro7      | 445.5128263 | -0.396985805 | 0.151501366 | -2.620344727 | 0.008784092 | 0.018072798 |
| Msl3l2     | 19.58784709 | -0.397102838 | 0.543813341 | -0.730219007 | 0.465256327 | 0.555723051 |
| AC133095.2 | 0.136746719 | -0.397143074 | 3.638498998 | -0.10915025  | 0.91308332  | NA          |

|                  |             |              |             |              |             |             |
|------------------|-------------|--------------|-------------|--------------|-------------|-------------|
| Jmjd1c           | 884.2599041 | -0.397202063 | 0.166693315 | -2.382831378 | 0.017180062 | 0.032831038 |
| Srpk3            | 4.828508036 | -0.397219553 | 1.209714732 | -0.328358035 | 0.742640968 | 0.802977309 |
| Il6st            | 1937.550804 | -0.397329654 | 0.276179386 | -1.438665138 | 0.150245421 | 0.21823157  |
| Cdk18            | 873.7566791 | -0.397349131 | 0.349652224 | -1.136412423 | 0.255783999 | 0.340730961 |
| Psmb7-ps2        | 1.450107671 | -0.397606374 | 1.778276827 | -0.22359082  | 0.823075707 | NA          |
| Gm7633           | 1.436963247 | -0.397766274 | 2.009148372 | -0.197977551 | 0.843062628 | NA          |
| Etv6             | 540.7489497 | -0.397865853 | 0.194977846 | -2.040569542 | 0.041293632 | 0.071389701 |
| Med14            | 308.8401513 | -0.398040748 | 0.217992862 | -1.825934779 | 0.067860087 | 0.11019992  |
| Btln9            | 102.7095996 | -0.398090377 | 0.445283309 | -0.894015941 | 0.371313362 | 0.463543511 |
| Cplx3            | 0.137130727 | -0.398407359 | 3.638526034 | -0.10949691  | 0.912808372 | NA          |
| Defb25           | 0.137130727 | -0.398407359 | 3.638526034 | -0.10949691  | 0.912808372 | NA          |
| Elobl            | 0.137130727 | -0.398407359 | 3.638526034 | -0.10949691  | 0.912808372 | NA          |
| Fbxw25           | 0.137130727 | -0.398407359 | 3.638526034 | -0.10949691  | 0.912808372 | NA          |
| Gm11913          | 0.137130727 | -0.398407359 | 3.638526034 | -0.10949691  | 0.912808372 | NA          |
| Gm17147          | 0.137130727 | -0.398407359 | 3.638526034 | -0.10949691  | 0.912808372 | NA          |
| Gm18888          | 0.137130727 | -0.398407359 | 3.638526034 | -0.10949691  | 0.912808372 | NA          |
| Gm20614          | 0.137130727 | -0.398407359 | 3.638526034 | -0.10949691  | 0.912808372 | NA          |
| Gm2956           | 0.137130727 | -0.398407359 | 3.638526034 | -0.10949691  | 0.912808372 | NA          |
| Gm3972           | 0.137130727 | -0.398407359 | 3.638526034 | -0.10949691  | 0.912808372 | NA          |
| Gm43239          | 0.137130727 | -0.398407359 | 3.638526034 | -0.10949691  | 0.912808372 | NA          |
| Gm43841          | 0.137130727 | -0.398407359 | 3.638526034 | -0.10949691  | 0.912808372 | NA          |
| Gm9242           | 0.137130727 | -0.398407359 | 3.638526034 | -0.10949691  | 0.912808372 | NA          |
| Igkv9-129        | 0.137130727 | -0.398407359 | 3.638526034 | -0.10949691  | 0.912808372 | NA          |
| Lalba            | 0.137130727 | -0.398407359 | 3.638526034 | -0.10949691  | 0.912808372 | NA          |
| Olfr768          | 0.137130727 | -0.398407359 | 3.638526034 | -0.10949691  | 0.912808372 | NA          |
| Rps25-ps1        | 0.137130727 | -0.398407359 | 3.638526034 | -0.10949691  | 0.912808372 | NA          |
| Spem1            | 0.137130727 | -0.398407359 | 3.638526034 | -0.10949691  | 0.912808372 | NA          |
| Xlr5b            | 0.137130727 | -0.398407359 | 3.638526034 | -0.10949691  | 0.912808372 | NA          |
| Zscan4a          | 0.137130727 | -0.398407359 | 3.638526034 | -0.10949691  | 0.912808372 | NA          |
| 1700011L22Rik    | 0.137130727 | -0.398407359 | 3.638526034 | -0.10949691  | 0.912808372 | NA          |
| AC133095.1       | 0.137130727 | -0.398407359 | 3.638526034 | -0.10949691  | 0.912808372 | NA          |
| Acrv1            | 0.137130727 | -0.398407359 | 3.638526034 | -0.10949691  | 0.912808372 | NA          |
| Actl7b           | 0.137130727 | -0.398407359 | 3.638526034 | -0.10949691  | 0.912808372 | NA          |
| Fabp3-ps1        | 0.137130727 | -0.398407359 | 3.638526034 | -0.10949691  | 0.912808372 | NA          |
| Fam151a          | 0.137130727 | -0.398407359 | 3.638526034 | -0.10949691  | 0.912808372 | NA          |
| Gm11784          | 0.137130727 | -0.398407359 | 3.638526034 | -0.10949691  | 0.912808372 | NA          |
| Gm12791          | 0.137130727 | -0.398407359 | 3.638526034 | -0.10949691  | 0.912808372 | NA          |
| Gm12943          | 0.137130727 | -0.398407359 | 3.638526034 | -0.10949691  | 0.912808372 | NA          |
| Gm13787          | 0.137130727 | -0.398407359 | 3.638526034 | -0.10949691  | 0.912808372 | NA          |
| Gm29126          | 0.137130727 | -0.398407359 | 3.638526034 | -0.10949691  | 0.912808372 | NA          |
| Gm29487          | 0.137130727 | -0.398407359 | 3.638526034 | -0.10949691  | 0.912808372 | NA          |
| Gm44084          | 0.137130727 | -0.398407359 | 3.638526034 | -0.10949691  | 0.912808372 | NA          |
| Gm47961          | 0.137130727 | -0.398407359 | 3.638526034 | -0.10949691  | 0.912808372 | NA          |
| Gm5746           | 0.137130727 | -0.398407359 | 3.638526034 | -0.10949691  | 0.912808372 | NA          |
| Gm6257           | 0.137130727 | -0.398407359 | 3.638526034 | -0.10949691  | 0.912808372 | NA          |
| Ighv2-4          | 0.137130727 | -0.398407359 | 3.638526034 | -0.10949691  | 0.912808372 | NA          |
| Lce1c            | 0.137130727 | -0.398407359 | 3.638526034 | -0.10949691  | 0.912808372 | NA          |
| Lrrc10b          | 0.137130727 | -0.398407359 | 3.638526034 | -0.10949691  | 0.912808372 | NA          |
| Mettl21c         | 0.137130727 | -0.398407359 | 3.638526034 | -0.10949691  | 0.912808372 | NA          |
| Olfr300-ps1      | 0.137130727 | -0.398407359 | 3.638526034 | -0.10949691  | 0.912808372 | NA          |
| Olfr640          | 0.137130727 | -0.398407359 | 3.638526034 | -0.10949691  | 0.912808372 | NA          |
| Rpsa-ps2         | 0.137130727 | -0.398407359 | 3.638526034 | -0.10949691  | 0.912808372 | NA          |
| Tas1r2           | 0.137130727 | -0.398407359 | 3.638526034 | -0.10949691  | 0.912808372 | NA          |
| Traj32           | 0.137130727 | -0.398407359 | 3.638526034 | -0.10949691  | 0.912808372 | NA          |
| Trav15d-1-dv6d-1 | 0.137130727 | -0.398407359 | 3.638526034 | -0.10949691  | 0.912808372 | NA          |
| Trav6-5          | 0.137130727 | -0.398407359 | 3.638526034 | -0.10949691  | 0.912808372 | NA          |
| Trbv20           | 0.137130727 | -0.398407359 | 3.638526034 | -0.10949691  | 0.912808372 | NA          |
| Ccdc15           | 20.46843758 | -0.398732285 | 0.578996782 | -0.688660625 | 0.49103686  | 0.580969977 |
| Sart3            | 405.6850025 | -0.3988065   | 0.211143974 | -1.888789394 | 0.058920054 | 0.097256883 |
| Kdr              | 372.3243429 | -0.399058393 | 0.361386626 | -1.104242282 | 0.269488053 | 0.355838612 |
| Gabrd            | 2.037390164 | -0.399252365 | 1.414548252 | -0.282247258 | 0.777753924 | 0.831920498 |
| Samms50          | 1932.088829 | -0.399491581 | 0.170120393 | -2.348287436 | 0.018859961 | 0.035677387 |
| Bcl2l14          | 8.983687926 | -0.399738823 | 0.716629166 | -0.557804289 | 0.576978033 | 0.660587902 |
| Ttc9c            | 422.7558906 | -0.399740081 | 0.152879965 | -2.614731639 | 0.008929759 | 0.018332674 |
| 5830417110Rik    | 331.3630705 | -0.399895498 | 0.228698945 | -1.748567305 | 0.080365842 | 0.1277226   |
| Stt3a            | 2247.799763 | -0.400030458 | 0.251265667 | -1.592061755 | 0.111370829 | 0.169310674 |

|               |             |              |             |              |             |             |
|---------------|-------------|--------------|-------------|--------------|-------------|-------------|
| Rab15         | 3.38164614  | -0.400351362 | 1.116798637 | -0.358481241 | 0.719983204 | 0.784298636 |
| Camsap2       | 342.7731582 | -0.400391988 | 0.192779808 | -2.076939448 | 0.037807148 | 0.066031786 |
| Gabrb1        | 8.781138856 | -0.40078326  | 0.721534261 | -0.555459777 | 0.578580215 | 0.662166723 |
| Cnm3          | 399.687391  | -0.401371459 | 0.248150208 | -1.617453645 | 0.105780394 | 0.161821981 |
| B230219D22Rik | 833.3420992 | -0.401391736 | 0.184821919 | -2.171775612 | 0.029872592 | 0.053578953 |
| Unc5c         | 7.472143074 | -0.401404368 | 0.922711876 | -0.435026771 | 0.663542996 | 0.73720521  |
| Supt20        | 630.715452  | -0.401590301 | 0.174562201 | -2.300557044 | 0.021416681 | 0.039942193 |
| Tbc1d2        | 43.79124262 | -0.401708145 | 0.37055634  | -1.084067663 | 0.278334799 | 0.365679074 |
| Ccdc32        | 166.2337917 | -0.401759829 | 0.200618495 | -2.002606137 | 0.045219581 | 0.077322308 |
| Cep89         | 184.1125798 | -0.401809042 | 0.256589679 | -1.565959486 | 0.117358102 | 0.177023617 |
| Kbtbd13       | 2.104597721 | -0.401899906 | 1.527854805 | -0.263048495 | 0.792513202 | 0.843684592 |
| Tmem39a       | 342.7015812 | -0.401965065 | 0.214040378 | -1.877987079 | 0.060382933 | 0.099392511 |
| Pmel          | 7.659701717 | -0.402008753 | 0.72691092  | -0.553037164 | 0.580237963 | 0.663752049 |
| Rpl35         | 2975.60712  | -0.402064431 | 0.167687104 | -2.397706325 | 0.016498087 | 0.031691198 |
| Zmym3         | 518.3179401 | -0.402151606 | 0.283484455 | -1.41860197  | 0.156015091 | 0.225230356 |
| AC126553.1    | 0.653159261 | -0.402222154 | 2.215081883 | -0.181583424 | 0.855909658 | NA          |
| Olfr1257      | 0.571650838 | -0.402695816 | 2.55355531  | -0.157700056 | 0.874693156 | NA          |
| Gm13002       | 6.251452435 | -0.403074081 | 0.797610691 | -0.505351903 | 0.613311694 | 0.69385744  |
| Dut           | 266.8883911 | -0.403250661 | 0.281524204 | -1.432383631 | 0.15203406  | 0.220378936 |
| Bcl9          | 211.8712269 | -0.403301917 | 0.235301301 | -1.713980821 | 0.086532248 | 0.136403307 |
| Smarcal1      | 273.9817498 | -0.403811977 | 0.166876654 | -2.419823068 | 0.01552806  | 0.030054765 |
| Klhl15        | 94.28531018 | -0.403925526 | 0.297223171 | -1.358997431 | 0.174147403 | 0.246932124 |
| Hgh1          | 139.2040941 | -0.403999393 | 0.231223958 | -1.747221165 | 0.080598982 | 0.128021191 |
| Zfp64         | 257.7861835 | -0.404215683 | 0.193584365 | -2.088059554 | 0.036792463 | 0.064437837 |
| Rfx3          | 80.95613807 | -0.404326253 | 0.310105579 | -1.303834178 | 0.192290127 | 0.268349876 |
| Mug4-ps       | 1.995752495 | -0.404857634 | 1.462165689 | -0.276889026 | 0.781865319 | 0.835245952 |
| Bid           | 398.1284971 | -0.405506492 | 0.180697925 | -2.244112607 | 0.024825157 | 0.045522134 |
| Smarcad1      | 394.2878359 | -0.405787942 | 0.209734967 | -1.934765327 | 0.0530191   | 0.08875389  |
| Qk            | 1043.64964  | -0.405979461 | 0.154791592 | -2.62274879  | 0.008722356 | 0.017956614 |
| Hdac8         | 120.5416757 | -0.406092483 | 0.315119874 | -1.288692072 | 0.19750516  | 0.274325237 |
| Zfp760        | 192.9221408 | -0.406489061 | 0.237796619 | -1.709397982 | 0.087377255 | 0.13762079  |
| Cbfa2t2       | 329.412389  | -0.406491817 | 0.196330784 | -2.070443606 | 0.038410822 | 0.066969492 |
| Taf1d         | 585.2764044 | -0.406662782 | 0.174042062 | -2.336577597 | 0.019461158 | 0.036692527 |
| Mbnl2         | 1055.200152 | -0.406950179 | 0.193091114 | -2.107555186 | 0.035069483 | 0.061743732 |
| Rc3h2         | 494.2215688 | -0.407088673 | 0.166653006 | -2.44273225  | 0.014576547 | 0.028390378 |
| Glb1          | 359.0039258 | -0.40719791  | 0.208237937 | -1.955445374 | 0.050530525 | 0.085190308 |
| Ildr1         | 12.24272625 | -0.407319605 | 0.592069795 | -0.687958764 | 0.491478749 | 0.581412096 |
| Prickle1      | 44.62823059 | -0.407471004 | 0.426938515 | -0.954402074 | 0.339880157 | 0.432279686 |
| Parp2         | 294.0068594 | -0.408135358 | 0.206218386 | -1.979141458 | 0.047800082 | 0.081229645 |
| Atp6v0d2      | 56.72451344 | -0.408135837 | 0.501436996 | -0.813932438 | 0.415683657 | 0.507779806 |
| Apobec1       | 671.1681125 | -0.408162185 | 0.250824175 | -1.627284077 | 0.103676778 | 0.159175226 |
| Ppil1         | 303.5291878 | -0.408397061 | 0.148302298 | -2.753814784 | 0.005890509 | 0.012608548 |
| Olfr629       | 1.146850497 | -0.408590379 | 2.004942243 | -0.203791596 | 0.838516361 | NA          |
| Rps16         | 3924.471527 | -0.408742072 | 0.124226621 | -3.290293731 | 0.001000828 | 0.002523236 |
| Polr2g        | 269.3179231 | -0.408816721 | 0.163165125 | -2.505539832 | 0.012226463 | 0.024279177 |
| Asb6          | 231.6122386 | -0.409570583 | 0.180919382 | -2.263829213 | 0.023584621 | 0.043528269 |
| Ypel2         | 587.4786124 | -0.409811369 | 0.180411513 | -2.271536682 | 0.023114509 | 0.042781039 |
| Gm13357       | 0.580083358 | -0.410143491 | 2.549248623 | -0.160887992 | 0.87218162  | NA          |
| Sdc1          | 3950.314712 | -0.410480625 | 0.220949826 | -1.857800176 | 0.063197396 | 0.103401377 |
| Tmem87a       | 360.9110834 | -0.41057445  | 0.160812784 | -2.553120716 | 0.010676249 | 0.021516573 |
| Mier2         | 321.0095033 | -0.41059613  | 0.205273012 | -2.0002441   | 0.045473912 | 0.077741602 |
| Fubp1         | 1073.10175  | -0.410906948 | 0.228640742 | -1.797172912 | 0.072308173 | 0.116414179 |
| Pde4a         | 91.05820534 | -0.410947207 | 0.315430406 | -1.302814185 | 0.192638207 | 0.268758663 |
| Nectin2       | 1587.825879 | -0.411699389 | 0.159112658 | -2.587471015 | 0.009668333 | 0.01969009  |
| Wdr36         | 488.9532462 | -0.411941213 | 0.148806335 | -2.768304281 | 0.005634882 | 0.012118515 |
| Rbm14         | 418.2889978 | -0.412096435 | 0.254546618 | -1.618942879 | 0.105459554 | 0.161432565 |
| Rnaseh2a      | 516.8754857 | -0.412117218 | 0.240921228 | -1.710589065 | 0.087156999 | 0.137311941 |
| Cdc42         | 3052.977731 | -0.412175329 | 0.157566018 | -2.615889736 | 0.008899529 | 0.018277216 |
| Stau2         | 146.126425  | -0.412757174 | 0.240360364 | -1.717243089 | 0.085934766 | 0.135611949 |
| 3110053B16Rik | 18.13483756 | -0.412814858 | 0.621859639 | -0.663839285 | 0.506793179 | 0.596177899 |
| Zfp950        | 906.1417957 | -0.412863054 | 0.184001739 | -2.243799738 | 0.024845289 | 0.045554151 |
| Otud7b        | 724.9351637 | -0.413282756 | 0.239437148 | -1.726059466 | 0.084336715 | 0.133336949 |
| Kbtbd2        | 375.7629882 | -0.413429629 | 0.155627834 | -2.656527557 | 0.007895    | 0.016435945 |
| Snx10         | 697.6777599 | -0.413429943 | 0.180687626 | -2.288092174 | 0.022132154 | 0.041163971 |
| Slc25a48      | 310.0660383 | -0.413437083 | 0.359738797 | -1.149270212 | 0.250444577 | 0.334842691 |
| Trmt112-ps2   | 59.29162985 | -0.413713743 | 0.454679782 | -0.909901341 | 0.362874543 | 0.455309134 |



|            |             |              |             |              |             |             |
|------------|-------------|--------------|-------------|--------------|-------------|-------------|
| Mapkapk2   | 1408.305934 | -0.413987937 | 0.195015387 | -2.122847553 | 0.033766629 | 0.059715092 |
| Pola2      | 217.6799157 | -0.414412448 | 0.212099442 | -1.953859206 | 0.05071787  | 0.085472346 |
| Rtcb       | 1303.187557 | -0.414448838 | 0.116809529 | -3.548073871 | 0.000388059 | 0.001057535 |
| Tubb2a     | 2628.030872 | -0.414473541 | 0.249361935 | -1.662136367 | 0.096485435 | 0.149768978 |
| Klf8       | 1.907547382 | -0.414515973 | 2.027250824 | -0.204471972 | 0.837984693 | 0.879259537 |
| Zxda       | 22.88229249 | -0.414626993 | 0.567581654 | -0.730515143 | 0.46507536  | 0.555613506 |
| Gm12222    | 0.581065123 | -0.414728995 | 2.549176395 | -0.162691368 | 0.870761444 | NA          |
| Fem1b      | 359.3531797 | -0.414845508 | 0.160489356 | -2.584878632 | 0.009741328 | 0.019822173 |
| Cuedc2     | 429.829436  | -0.415294811 | 0.155887252 | -2.664071663 | 0.007720111 | 0.016099383 |
| Rai1       | 533.1733491 | -0.415446236 | 0.228174043 | -1.820742751 | 0.06864597  | 0.111285327 |
| Agl        | 1045.979992 | -0.415510231 | 0.241398431 | -1.721263177 | 0.085203078 | 0.134556932 |
| Usp25      | 574.5102199 | -0.415576498 | 0.14795882  | -2.808730828 | 0.004973721 | 0.010820827 |
| Tut4       | 500.4924825 | -0.415576665 | 0.150377855 | -2.763549622 | 0.00571764  | 0.012282551 |
| Olfr111    | 4.163001765 | -0.415622607 | 0.981876753 | -0.42329407  | 0.672080721 | 0.74414705  |
| Itpr1      | 875.8238329 | -0.415958141 | 0.189101875 | -2.199651058 | 0.027831662 | 0.050368808 |
| Dsc2       | 1195.176366 | -0.415973016 | 0.176398813 | -2.358139536 | 0.018366788 | 0.034837227 |
| Rps6kc1    | 212.7762583 | -0.416264152 | 0.234248335 | -1.777020754 | 0.075564825 | 0.120960483 |
| Nek6       | 1633.322743 | -0.416348196 | 0.214738722 | -1.938859428 | 0.052518457 | 0.088010878 |
| Il20rb     | 38.03689679 | -0.416627213 | 0.366988511 | -1.135259554 | 0.256266583 | 0.341215863 |
| Slitrk2    | 2.520964899 | -0.417273358 | 1.3614044   | -0.306502137 | 0.759222353 | 0.816710164 |
| C2         | 3407.599607 | -0.417324986 | 0.137568645 | -3.033576347 | 0.002416736 | 0.005620039 |
| Olfr1009   | 2.038081428 | -0.417359362 | 1.622745072 | -0.257193425 | 0.79702946  | 0.847043247 |
| Gm10060    | 1.070675165 | -0.41748536  | 2.053056472 | -0.20334821  | 0.838862876 | NA          |
| Dennd5a    | 867.1608655 | -0.417756995 | 0.154268038 | -2.707994485 | 0.006769115 | 0.014281902 |
| Trrap      | 1317.830716 | -0.418108305 | 0.266269013 | -1.570247699 | 0.116357496 | 0.175809855 |
| Prox1      | 2299.922705 | -0.41823508  | 0.232662112 | -1.797607169 | 0.072239281 | 0.116314249 |
| Tti1       | 347.5892645 | -0.41857638  | 0.215692312 | -1.940617984 | 0.052304631 | 0.0877647   |
| Gldc       | 4088.779215 | -0.418578254 | 0.22251507  | -1.881123169 | 0.059955166 | 0.098755137 |
| Ccdc125    | 189.6151236 | -0.418852739 | 0.175112303 | -2.391909255 | 0.016760986 | 0.032112979 |
| Atp10b     | 4.49225771  | -0.418949168 | 0.882600989 | -0.474675616 | 0.635018201 | 0.712832705 |
| Rpl9       | 4285.182405 | -0.418969177 | 0.130200011 | -3.217888948 | 0.001291378 | 0.00319064  |
| Mid1       | 278.0027669 | -0.419007114 | 0.400989814 | -1.044932063 | 0.296054369 | 0.3855129   |
| Gemin5     | 305.7858494 | -0.419407109 | 0.207595914 | -2.020305219 | 0.043351738 | 0.074524597 |
| Rasef      | 1.608113283 | -0.42011799  | 1.590616131 | -0.264122802 | 0.791685294 | NA          |
| Spg11      | 446.7774869 | -0.420183391 | 0.161076427 | -2.608596428 | 0.009091439 | 0.018638057 |
| Srpk1      | 731.119258  | -0.420282024 | 0.16632379  | -2.526890611 | 0.011507734 | 0.023050623 |
| Hsh2d      | 5.525528343 | -0.42029351  | 0.817817701 | -0.513920778 | 0.60730738  | 0.688526715 |
| Cdiptos    | 11.86589406 | -0.420366812 | 0.569709959 | -0.737861092 | 0.460598865 | 0.551153888 |
| Nrf1       | 241.242862  | -0.420518211 | 0.180392903 | -2.331123915 | 0.019746827 | 0.037165368 |
| Bmpr1a     | 689.5974151 | -0.420713113 | 0.165284183 | -2.54539246  | 0.010915498 | 0.021958531 |
| Lipo3      | 47.31803073 | -0.421015783 | 0.404690866 | -1.040339227 | 0.298182326 | 0.387776327 |
| Ranbp1     | 755.0353498 | -0.421063914 | 0.224155765 | -1.878443387 | 0.060320535 | 0.09929939  |
| Csgalnact2 | 215.0578555 | -0.421335596 | 0.193029241 | -2.182755285 | 0.029053836 | 0.052291997 |
| Ciz1       | 840.1657613 | -0.421394336 | 0.186010161 | -2.265437188 | 0.023485864 | 0.04336478  |
| Pgd        | 1122.89454  | -0.4217395   | 0.218553144 | -1.929688554 | 0.053645439 | 0.089643937 |
| BC048403   | 112.0536112 | -0.422348424 | 0.323342985 | -1.306193251 | 0.191486847 | 0.267405083 |
| Ralgapa2   | 788.3453278 | -0.422498537 | 0.123116942 | -3.431684787 | 0.000599844 | 0.00157884  |
| Tmem109    | 497.6466216 | -0.422555848 | 0.179844039 | -2.349568275 | 0.018795197 | 0.035566713 |
| Strn3      | 452.5606704 | -0.422722189 | 0.159272479 | -2.654081816 | 0.007952454 | 0.01653738  |
| Vmn1r1     | 5.087366604 | -0.422832812 | 0.930810931 | -0.454262834 | 0.649639663 | 0.72523456  |
| Adat2      | 46.5368664  | -0.422897211 | 0.370943612 | -1.140057943 | 0.254262162 | 0.339148841 |
| Armh4      | 5.080275291 | -0.423193732 | 1.197945314 | -0.353266319 | 0.723888793 | 0.787647188 |
| Apc        | 778.4501262 | -0.423232114 | 0.147532571 | -2.868736781 | 0.004121146 | 0.00913144  |
| Olfr1173   | 13.88039916 | -0.423366252 | 0.526333325 | -0.804369079 | 0.421183853 | 0.512991522 |
| Gm6939     | 8.526508171 | -0.423400056 | 0.690695671 | -0.613005227 | 0.539872884 | 0.626958646 |
| Pitpnc1    | 463.7261631 | -0.423946891 | 0.201441572 | -2.104565045 | 0.035329187 | 0.062123018 |
| Fbxo38     | 512.5472004 | -0.424037739 | 0.144855202 | -2.927321443 | 0.003418953 | 0.007707791 |
| Fiz1       | 386.9323581 | -0.424046283 | 0.215604784 | -1.966775851 | 0.049209058 | 0.08321754  |
| Tmed7      | 1803.450683 | -0.424463879 | 0.13462719  | -3.152883732 | 0.001616662 | 0.003903803 |
| Urb1       | 143.6179453 | -0.424747665 | 0.191846873 | -2.213993161 | 0.026829249 | 0.048777332 |
| Ruvbl1     | 375.2437278 | -0.424783509 | 0.164676335 | -2.579505484 | 0.009894189 | 0.02010203  |
| Gm7331     | 25.37635944 | -0.424810023 | 0.449151107 | -0.945806469 | 0.34427306  | 0.436563867 |
| Cct5       | 2444.744804 | -0.424835325 | 0.156884689 | -2.707946369 | 0.006770096 | 0.014281902 |
| Parn       | 456.0264119 | -0.424883183 | 0.15967895  | -2.660859067 | 0.007794157 | 0.016235923 |
| Scal       | 170.9876909 | -0.424907656 | 0.283446208 | -1.499076876 | 0.13385369  | 0.197724435 |
| Gprc5c     | 1517.984442 | -0.42503699  | 0.189151938 | -2.247066528 | 0.024635776 | 0.045228377 |

|          |             |              |             |              |             |             |
|----------|-------------|--------------|-------------|--------------|-------------|-------------|
| Jrkl     | 105.1840186 | -0.425714951 | 0.242684973 | -1.754187521 | 0.079398381 | 0.126385023 |
| Nup35    | 128.4724481 | -0.425788604 | 0.219927555 | -1.936040276 | 0.052862768 | 0.088526962 |
| Ppard    | 188.9827222 | -0.426250383 | 0.194097079 | -2.196067991 | 0.028087077 | 0.050771763 |
| Mtf2     | 288.0321837 | -0.426562535 | 0.278432434 | -1.532014531 | 0.125518849 | 0.187332262 |
| Arhgef18 | 608.4591039 | -0.426893076 | 0.189531338 | -2.252361435 | 0.024299441 | 0.044683083 |
| Tmx3     | 502.3688424 | -0.426983427 | 0.199176805 | -2.143740718 | 0.032053668 | 0.057136232 |
| Gm47924  | 83.17927927 | -0.427240288 | 0.36398482  | -1.173786004 | 0.240480752 | 0.323902023 |
| Reg1     | 11.3837963  | -0.427314125 | 1.569606263 | -0.272242877 | 0.785435275 | 0.837745701 |
| Erh      | 659.2667208 | -0.427602887 | 0.149423027 | -2.861693371 | 0.004213844 | 0.009323505 |
| Tra2a    | 744.921464  | -0.427864169 | 0.18766561  | -2.279928481 | 0.022611931 | 0.041937358 |
| Nat14    | 24.35441907 | -0.428188005 | 0.564554398 | -0.75845305  | 0.44817981  | 0.539397769 |
| Zfp53    | 129.5539347 | -0.428258871 | 0.243455516 | -1.759084687 | 0.078563125 | 0.125301166 |
| Tatdn2   | 501.1369431 | -0.428722199 | 0.159608598 | -2.686084606 | 0.007229478 | 0.015182082 |
| Armh3    | 133.8378433 | -0.428894437 | 0.221085251 | -1.93995047  | 0.05238571  | 0.087857509 |
| Fancm    | 130.4009499 | -0.428994455 | 0.428739573 | -1.000594491 | 0.317022895 | 0.408429422 |
| Nf2      | 665.4231259 | -0.428997289 | 0.206210703 | -2.08038323  | 0.037490396 | 0.065538995 |
| Tbrg1    | 919.8019274 | -0.429538811 | 0.132125706 | -3.25098593  | 0.001150055 | 0.002868492 |
| Cd47     | 1830.928668 | -0.429588983 | 0.132425955 | -3.243993838 | 0.001178663 | 0.002933408 |
| Traf5    | 122.7626321 | -0.429590804 | 0.218268144 | -1.968179122 | 0.049047432 | 0.083026573 |
| Brd1     | 784.9191677 | -0.429678105 | 0.184844424 | -2.32453917  | 0.020096615 | 0.037736214 |
| Tsen34   | 733.8555392 | -0.429854208 | 0.166180723 | -2.586667086 | 0.009690917 | 0.01973137  |
| Znfx1    | 702.7941676 | -0.429869591 | 0.179716969 | -2.391925451 | 0.016760246 | 0.032112979 |
| Rab3ip   | 636.432846  | -0.430407158 | 0.15184644  | -2.834489617 | 0.004589895 | 0.010062825 |
| Sorbs1   | 358.4235156 | -0.430480454 | 0.213720353 | -2.014223022 | 0.043986124 | 0.075425009 |
| Zfp438   | 42.94400117 | -0.430710743 | 0.307186701 | -1.402113898 | 0.160881238 | 0.230867284 |
| Tmem106c | 449.0474029 | -0.4307698   | 0.211483976 | -2.036890965 | 0.04166097  | 0.071908091 |
| Inf2     | 1216.309671 | -0.430772427 | 0.23241364  | -1.853473092 | 0.063814579 | 0.10429594  |
| Grk6     | 391.9104338 | -0.431469999 | 0.192012588 | -2.247092252 | 0.024634132 | 0.045228377 |
| Ntan1    | 299.0292722 | -0.431496699 | 0.22901824  | -1.884114989 | 0.059549423 | 0.098162693 |
| Lmo4     | 314.7222045 | -0.431501623 | 0.184263851 | -2.341759493 | 0.019193079 | 0.036227148 |
| Rdh19    | 1.516573322 | -0.43200763  | 2.050010851 | -0.210734314 | 0.833094597 | NA          |
| Ncoa5    | 509.9896527 | -0.432115214 | 0.13842728  | -3.121604454 | 0.001798684 | 0.00429287  |
| Galnt1   | 1082.814209 | -0.4321849   | 0.147224011 | -2.935559874 | 0.003329464 | 0.007528942 |
| Psmc10   | 227.4913084 | -0.432218303 | 0.241339015 | -1.790917656 | 0.07330651  | 0.117843412 |
| Haus6    | 129.0189771 | -0.432343763 | 0.261144468 | -1.655573124 | 0.097808297 | 0.151502439 |
| Ndfip2   | 698.7701358 | -0.432500464 | 0.188852231 | -2.290152791 | 0.022012461 | 0.040959227 |
| Aldoa    | 2719.688186 | -0.433010843 | 0.210645845 | -2.055634389 | 0.03981777  | 0.069153764 |
| Stx2     | 245.9388924 | -0.433157412 | 0.196750208 | -2.201560126 | 0.027696395 | 0.050139975 |
| Gm15421  | 2.406968865 | -0.433277159 | 1.357651383 | -0.319137272 | 0.749622421 | 0.808577224 |
| Katnb1   | 64.04797854 | -0.433323598 | 0.309934676 | -1.398112673 | 0.162079235 | 0.232254081 |
| Crb3     | 353.7243552 | -0.433867258 | 0.237757948 | -1.824827569 | 0.068027054 | 0.110425682 |
| Olfr224  | 1.935758612 | -0.434335791 | 1.788481871 | -0.24285166  | 0.808120315 | 0.856612902 |
| Cox8b    | 0.551800414 | -0.434478017 | 2.965559143 | -0.146507959 | 0.883520408 | NA          |
| Twsg1    | 1075.130689 | -0.435038118 | 0.135887661 | -3.201454171 | 0.001367358 | 0.003357926 |
| Gm46136  | 15.34946809 | -0.435443161 | 0.522826683 | -0.832863309 | 0.404921825 | 0.497736482 |
| Lgi4     | 11.91766102 | -0.435517256 | 0.888197502 | -0.490338303 | 0.623894527 | 0.703162955 |
| Btrc     | 371.4598053 | -0.435642157 | 0.131418102 | -3.314932656 | 0.000916652 | 0.002330661 |
| BC005537 | 2933.645722 | -0.435799229 | 0.204414028 | -2.131943848 | 0.033011463 | 0.05858624  |
| Myom3    | 24.55514462 | -0.435816666 | 0.605504063 | -0.71975845  | 0.471673731 | 0.56227493  |
| Ankrd61  | 0.540201634 | -0.435922867 | 2.532892452 | -0.172104768 | 0.863355165 | NA          |
| Ankrd16  | 789.6743992 | -0.436181145 | 0.227211456 | -1.919714579 | 0.054893962 | 0.091363103 |
| Gm20878  | 14.64447379 | -0.43660936  | 0.510437172 | -0.855363567 | 0.392349907 | 0.484834822 |
| Rnase10  | 1.210388806 | -0.436641004 | 1.607353137 | -0.271652192 | 0.785889464 | NA          |
| Tgif1    | 771.9479435 | -0.437124177 | 0.157171505 | -2.781192287 | 0.005415965 | 0.011691955 |
| Sic1a7   | 1.179932478 | -0.437226561 | 1.723299575 | -0.253714773 | 0.79971592  | NA          |
| Zfp788   | 122.0962929 | -0.438104607 | 0.294441826 | -1.487915669 | 0.136773135 | 0.20130436  |
| Abi1     | 980.4177252 | -0.438143514 | 0.196415701 | -2.230694954 | 0.025701342 | 0.046926902 |
| Ccdc173  | 25.97912724 | -0.438294252 | 0.425543695 | -1.029962978 | 0.303027385 | 0.39309168  |
| Rbm3-ps  | 0.58515027  | -0.438781103 | 2.98834447  | -0.146830831 | 0.883265549 | NA          |
| Uchl4    | 9.839036908 | -0.438807639 | 0.704362818 | -0.62298524  | 0.533294221 | 0.620968505 |
| Elp1     | 302.5267838 | -0.439282209 | 0.206032812 | -2.132098303 | 0.032998766 | 0.058577742 |
| Aaas     | 332.8318436 | -0.439295968 | 0.234252187 | -1.875312132 | 0.060749795 | 0.099909561 |
| Grwd1    | 217.9212126 | -0.439396897 | 0.235222967 | -1.868001678 | 0.061761837 | 0.101368107 |
| Thop1    | 253.2411577 | -0.439437605 | 0.211004508 | -2.082598186 | 0.037287865 | 0.065225069 |
| Rpap1    | 275.8571038 | -0.439579853 | 0.201491675 | -2.181627867 | 0.029137009 | 0.052417476 |
| Ywhaq    | 1122.504033 | -0.439625492 | 0.214004736 | -2.054279263 | 0.039948671 | 0.069345783 |

|             |             |              |             |              |             |             |
|-------------|-------------|--------------|-------------|--------------|-------------|-------------|
| Zfp948      | 131.1264988 | -0.439858587 | 0.286386739 | -1.535890203 | 0.124565311 | 0.186198109 |
| Polr1c      | 398.9484151 | -0.439942706 | 0.143576846 | -3.06416193  | 0.002182807 | 0.005126395 |
| Ggt6        | 455.174555  | -0.440121662 | 0.210447644 | -2.091359418 | 0.036495857 | 0.063957789 |
| Zfp383      | 89.78215166 | -0.440265109 | 0.246800395 | -1.783891429 | 0.074441309 | 0.119402771 |
| Slc41a1     | 149.1553449 | -0.44032938  | 0.34768367  | -1.266465522 | 0.205346466 | 0.283690968 |
| Smarcc1     | 693.5203817 | -0.440432427 | 0.217566093 | -2.024361521 | 0.042932968 | 0.073856835 |
| Mettl16     | 307.3743826 | -0.440871676 | 0.240481977 | -1.833283648 | 0.0667604   | 0.108538175 |
| Nrtn        | 20.80355902 | -0.4412455   | 0.802902623 | -0.549562907 | 0.582619206 | 0.665939807 |
| Setd5       | 1274.032063 | -0.441251543 | 0.16076157  | -2.744757612 | 0.006055561 | 0.012925403 |
| Amd1        | 1060.081224 | -0.441271082 | 0.151320787 | -2.916129961 | 0.003544028 | 0.007956096 |
| Pigu        | 456.0330809 | -0.441320189 | 0.142918624 | -3.087912376 | 0.002015679 | 0.004761438 |
| Cfap45      | 11.41788225 | -0.441358033 | 0.528296935 | -0.835435535 | 0.403472529 | 0.496478915 |
| Capn1       | 510.05959   | -0.441821333 | 0.132848351 | -3.325756999 | 0.000881788 | 0.002251755 |
| Oreg        | 10.17292959 | -0.441988518 | 0.63568261  | -0.695297482 | 0.486868892 | 0.576799227 |
| Ocln        | 538.6751116 | -0.441997943 | 0.203271234 | -2.174424455 | 0.029673273 | 0.0532719   |
| Galc        | 160.6451077 | -0.442136883 | 0.202564144 | -2.182700624 | 0.029057864 | 0.052293726 |
| Faim2       | 4.413729446 | -0.4423087   | 1.039402036 | -0.425541499 | 0.670441976 | 0.743008179 |
| Gm21060     | 0.142558667 | -0.442406024 | 3.638827115 | -0.121579292 | 0.903232214 | NA          |
| Slc25a53    | 55.44753788 | -0.442481125 | 0.413383522 | -1.070388879 | 0.284444303 | 0.372643239 |
| Porcn       | 141.3727139 | -0.442753919 | 0.421609763 | -1.050151012 | 0.293648688 | 0.382906749 |
| Olfr676     | 4.418159352 | -0.442805188 | 1.386901688 | -0.319276551 | 0.749516812 | 0.808514466 |
| Hoxa2       | 6.885209461 | -0.442952383 | 0.765017538 | -0.579009449 | 0.562582798 | 0.647203694 |
| Nxt1        | 185.2934521 | -0.442980339 | 0.177932828 | -2.489593093 | 0.012788942 | 0.025254939 |
| Hrk         | 6.75401368  | -0.443215446 | 0.919111489 | -0.482221636 | 0.629648509 | 0.708203983 |
| Ten1        | 59.86286026 | -0.443303073 | 0.400770629 | -1.106126651 | 0.268671705 | 0.354953133 |
| Ccdc186     | 214.860304  | -0.443377325 | 0.271645722 | -1.632189608 | 0.102639549 | 0.157810158 |
| C1qtnf9     | 6.631438976 | -0.443552316 | 0.716437929 | -0.619107809 | 0.535845339 | 0.622977449 |
| Hnrnpf      | 3961.933096 | -0.443615203 | 0.165165384 | -2.68588485  | 0.007233801 | 0.01518742  |
| Sgms2       | 1039.458152 | -0.443896379 | 0.312049054 | -1.422521149 | 0.154875016 | 0.223849875 |
| Klhl32      | 9.382755141 | -0.443932879 | 0.673582456 | -0.659062413 | 0.509855691 | 0.599201697 |
| Zfp703      | 136.6450968 | -0.444303642 | 0.204480125 | -2.172845121 | 0.029791976 | 0.053448629 |
| Adamts17    | 2.791596483 | -0.444416999 | 1.29605302  | -0.342900323 | 0.731673449 | 0.794292471 |
| Ncl         | 4568.830439 | -0.444593527 | 0.124843123 | -3.561217611 | 0.000369139 | 0.001010774 |
| Sorbs3      | 1190.9949   | -0.444781707 | 0.339373786 | -1.310595353 | 0.18999451  | 0.265711764 |
| Syncrip     | 1009.791489 | -0.444790486 | 0.127924918 | -3.476965193 | 0.000507124 | 0.001353176 |
| Kif16b      | 317.3773307 | -0.445035631 | 0.219224453 | -2.030045578 | 0.042351907 | 0.072977143 |
| Anapc2      | 1185.014555 | -0.445486248 | 0.202032185 | -2.205026132 | 0.027452261 | 0.049772003 |
| Rpl31       | 3012.270192 | -0.445773716 | 0.141842249 | -3.142742854 | 0.001673728 | 0.004023934 |
| Set         | 2179.463325 | -0.446138679 | 0.162875893 | -2.739132673 | 0.006160151 | 0.013115805 |
| Ctbp1       | 1061.573459 | -0.446203746 | 0.171793775 | -2.597321972 | 0.009395381 | 0.019196124 |
| Lrp12       | 104.7030354 | -0.446400121 | 0.231501089 | -1.928285191 | 0.053819663 | 0.089908634 |
| Ifng        | 2.033695897 | -0.4465181   | 1.585213098 | -0.281677019 | 0.778191178 | 0.832216132 |
| Nup62cl     | 7.300770123 | -0.446712469 | 1.027467778 | -0.434770295 | 0.663729169 | 0.737294251 |
| Stx18       | 307.3878306 | -0.446953856 | 0.174439148 | -2.562233656 | 0.010400132 | 0.021032201 |
| Rpl41       | 7784.973262 | -0.447038272 | 0.176255365 | -2.536310148 | 0.011202747 | 0.022487275 |
| Hps3        | 263.8951684 | -0.447161116 | 0.199173052 | -2.245088433 | 0.024762456 | 0.045431592 |
| Tal1        | 27.53139348 | -0.447849569 | 0.538635798 | -0.831451549 | 0.405718588 | 0.498320641 |
| Snapc4      | 435.6728809 | -0.448155075 | 0.229333998 | -1.954158912 | 0.050682427 | 0.085421059 |
| Olfr1029    | 6.275487431 | -0.449096393 | 1.186656028 | -0.378455409 | 0.705092313 | 0.771578006 |
| Wdr89       | 56.12823264 | -0.449097664 | 0.282006986 | -1.592505459 | 0.111271177 | 0.169189354 |
| Sox13       | 250.389974  | -0.449257693 | 0.225707314 | -1.990443663 | 0.046542084 | 0.079321149 |
| Sdr39u1     | 274.514838  | -0.449443072 | 0.201777706 | -2.2274169   | 0.025919424 | 0.047284574 |
| Nrcam       | 2.937292506 | -0.449790146 | 1.355591116 | -0.331803698 | 0.740037492 | 0.801127709 |
| Morf4l2     | 2186.431849 | -0.450001518 | 0.161933768 | -2.778923272 | 0.005453941 | 0.011764998 |
| Ddx39b      | 2514.797489 | -0.451068851 | 0.16683534  | -2.703676873 | 0.006857694 | 0.014452957 |
| Grk2        | 908.7569027 | -0.451091181 | 0.162150227 | -2.781933707 | 0.005403608 | 0.011669712 |
| Cand1       | 915.9175831 | -0.451182059 | 0.243647892 | -1.851779039 | 0.064057559 | 0.104642896 |
| Mdm2        | 919.8079891 | -0.451216985 | 0.189020914 | -2.3871273   | 0.01698061  | 0.032482658 |
| Lrrc70      | 9.573921162 | -0.45129511  | 0.782942027 | -0.576409356 | 0.564338522 | 0.648829452 |
| Rnaset2a    | 652.3878486 | -0.451568229 | 0.144492523 | -3.125201353 | 0.001776834 | 0.004249048 |
| Gm20768     | 0.590672237 | -0.451613097 | 2.545719835 | -0.177400942 | 0.859193467 | NA          |
| Cenpq       | 86.5962751  | -0.451772175 | 0.303649963 | -1.487805794 | 0.136802117 | 0.201329635 |
| Btbd7       | 495.3139694 | -0.451888573 | 0.138064074 | -3.2730352   | 0.001063992 | 0.002667884 |
| Olfr188-ps1 | 2.240606001 | -0.45209927  | 1.322925438 | -0.341742064 | 0.732545013 | 0.79498551  |
| Lmod3       | 1.066737766 | -0.452131565 | 2.095933972 | -0.21571842  | 0.829207242 | NA          |
| Traf2       | 308.4270593 | -0.452154233 | 0.17270537  | -2.618067017 | 0.008842944 | 0.018174141 |



|               |             |              |             |              |             |             |
|---------------|-------------|--------------|-------------|--------------|-------------|-------------|
| Ddx58         | 622.9445833 | -0.452284556 | 0.205854234 | -2.197110774 | 0.028012536 | 0.050663878 |
| Pcd5-ps       | 48.78267289 | -0.452590809 | 0.543559889 | -0.83264203  | 0.405046647 | 0.497844927 |
| Smurf1        | 510.8056266 | -0.452810337 | 0.235827066 | -1.920094855 | 0.054845919 | 0.091301778 |
| Pof1b         | 3.349115836 | -0.453118749 | 1.101843674 | -0.411236875 | 0.680898852 | 0.751908513 |
| Trp53i13      | 86.62640839 | -0.453370117 | 0.364980372 | -1.242176708 | 0.214171371 | 0.293779508 |
| Rbm6-ps1      | 0.592706101 | -0.453385261 | 2.544158096 | -0.178206402 | 0.858560882 | NA          |
| Vav2          | 1112.97038  | -0.453411789 | 0.224914195 | -2.015932297 | 0.043807056 | 0.075193585 |
| Kctd1         | 18.51296933 | -0.453757352 | 0.693843869 | -0.653976165 | 0.513127162 | 0.602174699 |
| Scaf11        | 1469.115023 | -0.453989197 | 0.159798477 | -2.841010782 | 0.004497079 | 0.009882213 |
| Tubgcp5       | 148.6031693 | -0.454286218 | 0.253246112 | -1.793852683 | 0.072836686 | 0.117165485 |
| Ppp1r8        | 221.1640094 | -0.454559168 | 0.176122719 | -2.580922951 | 0.009853657 | 0.020026841 |
| Ubr1          | 451.1997496 | -0.454727716 | 0.238359868 | -1.907736063 | 0.056425338 | 0.09363761  |
| Nob1          | 290.6780711 | -0.454780736 | 0.171210568 | -2.656265559 | 0.007901137 | 0.016444705 |
| Rrp12         | 184.9431604 | -0.454781331 | 0.358778434 | -1.267582686 | 0.204947018 | 0.283185019 |
| Rfc3          | 178.2367554 | -0.454981384 | 0.338839283 | -1.342764567 | 0.17934822  | 0.253232438 |
| Derl3         | 104.6390574 | -0.455178422 | 0.583619871 | -0.779922763 | 0.435436339 | 0.526887551 |
| Gm11517       | 1.787860547 | -0.455721809 | 1.32255611  | -0.344576541 | 0.730412744 | 0.793277471 |
| Nup50         | 652.8887674 | -0.45579475  | 0.146826904 | -3.104299946 | 0.001907299 | 0.004528008 |
| D630045J12Rik | 107.8962654 | -0.456004685 | 0.349110284 | -1.306190926 | 0.191487638 | 0.267405083 |
| Pip5k1a       | 329.5260352 | -0.45618774  | 0.21736951  | -2.098674002 | 0.035845648 | 0.062934769 |
| Isy1          | 314.8489442 | -0.456568904 | 0.290457554 | -1.571895439 | 0.115974803 | 0.175402629 |
| Ddx27         | 635.8832973 | -0.456644383 | 0.204424943 | -2.233799734 | 0.025496253 | 0.046597354 |
| Nt5c          | 492.8132639 | -0.45672856  | 0.16315535  | -2.799347733 | 0.005120596 | 0.011107765 |
| Ksr2          | 11.36658386 | -0.456990967 | 0.656022636 | -0.696608535 | 0.486047813 | 0.57633128  |
| Bin3          | 292.6258611 | -0.457519962 | 0.18768466  | -2.437705676 | 0.014708003 | 0.028722573 |
| Grasp         | 44.36189126 | -0.457919301 | 0.382832248 | -1.196135653 | 0.231643626 | 0.314065575 |
| Stam2         | 381.7267813 | -0.458140028 | 0.190492424 | -2.40503018  | 0.01617113  | 0.031129791 |
| 1700037H04Rik | 133.692327  | -0.458250821 | 0.229192703 | -1.999412783 | 0.04556371  | 0.077871692 |
| Gm38317       | 42.89495132 | -0.458477093 | 0.564427932 | -0.812286329 | 0.416627353 | 0.508568174 |
| Il17rb        | 254.0695352 | -0.458595362 | 0.215770802 | -2.125381929 | 0.033554757 | 0.059395857 |
| Rps9          | 7082.64002  | -0.458656598 | 0.130433991 | -3.516388589 | 0.00043746  | 0.001180782 |
| Ssna1         | 352.7520816 | -0.459090461 | 0.161437398 | -2.843767724 | 0.004458354 | 0.009803433 |
| Bmx           | 5.077807238 | -0.45964132  | 0.928919066 | -0.494813098 | 0.620732058 | 0.700207776 |
| Slc9a3r2      | 385.5481994 | -0.459807102 | 0.18994606  | -2.420724603 | 0.015489607 | 0.029983743 |
| Etf1          | 1672.539747 | -0.45996173  | 0.176409967 | -2.607345483 | 0.009124724 | 0.018694048 |
| Rhobtb1       | 894.7557234 | -0.459978173 | 0.349039413 | -1.317840211 | 0.187557144 | 0.262885324 |
| Ppp3r1        | 622.6613891 | -0.460208369 | 0.214673286 | -2.143761707 | 0.032051985 | 0.057136232 |
| Chrna9        | 0.480223692 | -0.46030336  | 3.624901022 | -0.126983705 | 0.898953296 | NA          |
| Tmem116       | 3.352545716 | -0.460416623 | 1.138314506 | -0.404472245 | 0.685865484 | 0.756315315 |
| Prcd          | 2.315327912 | -0.460520055 | 1.202600561 | -0.382936837 | 0.701766598 | 0.769271924 |
| Nomo1         | 754.2151627 | -0.460718067 | 0.210633455 | -2.187297679 | 0.0287208   | 0.051785531 |
| Olfr281       | 1.710027724 | -0.460796283 | 1.435755804 | -0.320943354 | 0.748253319 | 0.807611433 |
| Hdc           | 33.48120847 | -0.461323225 | 0.479611032 | -0.961869503 | 0.33611516  | 0.428225935 |
| Lrrc42        | 480.3840602 | -0.461332191 | 0.184201999 | -2.504490689 | 0.012262783 | 0.024339962 |
| Cab39         | 1507.287779 | -0.461398523 | 0.207599403 | -2.222542629 | 0.026246656 | 0.047815025 |
| Olfr641       | 1.047521878 | -0.461533003 | 1.900751348 | -0.242816086 | 0.808147874 | NA          |
| Kdm6b         | 736.2424817 | -0.461710673 | 0.233357964 | -1.978551172 | 0.047866562 | 0.081326405 |
| Clint1        | 1092.773358 | -0.461897802 | 0.145297163 | -3.178987055 | 0.001477907 | 0.003597281 |
| Nono          | 2513.774882 | -0.462011292 | 0.197865636 | -2.334974895 | 0.019544732 | 0.036825663 |
| Snrbp2        | 329.8504414 | -0.462318365 | 0.191424892 | -2.415142359 | 0.015729061 | 0.030381716 |
| Vrk2          | 105.7010756 | -0.463392679 | 0.243722896 | -1.901309585 | 0.057261474 | 0.094877404 |
| Alms1         | 121.7886088 | -0.464206596 | 0.279807476 | -1.659021421 | 0.097111476 | 0.150600968 |
| Zfp991        | 45.62064958 | -0.46453231  | 0.349200826 | -1.330272657 | 0.183428453 | 0.257946734 |
| Trim34a       | 211.1570311 | -0.464631599 | 0.331769459 | -1.400465253 | 0.161374041 | 0.231457568 |
| 4930507D05Rik | 0.684023301 | -0.464699128 | 2.471563186 | -0.188018308 | 0.8508623   | NA          |
| Slc22a19      | 1.907835761 | -0.465104162 | 1.450204121 | -0.320716343 | 0.748425361 | 0.807643724 |
| Mapk8         | 525.6784031 | -0.465531254 | 0.181259621 | -2.568311964 | 0.010219514 | 0.020718548 |
| B630019K06Rik | 22.56717112 | -0.465929687 | 0.518114661 | -0.899279102 | 0.368504016 | 0.460845038 |
| Tmem141       | 258.7075966 | -0.466033875 | 0.177620108 | -2.623767552 | 0.008696311 | 0.017918143 |
| Shank3        | 157.3609502 | -0.466043765 | 0.2303639   | -2.023076381 | 0.043065273 | 0.074069489 |
| Oxtr          | 1.027055906 | -0.466305429 | 2.152308927 | -0.216653578 | 0.828478328 | NA          |
| Lrrc20        | 159.599333  | -0.466501455 | 0.21223662  | -2.19802527  | 0.027947305 | 0.050567359 |
| Rps7          | 4134.63657  | -0.466956586 | 0.163775658 | -2.851196518 | 0.004355504 | 0.009600806 |
| Tnnt3         | 1.531045637 | -0.467324455 | 1.861516311 | -0.25104505  | 0.801779279 | NA          |
| Pcdhb2        | 0.361426636 | -0.467419287 | 3.627475131 | -0.12885527  | 0.897472171 | NA          |
| Cdkn1b        | 775.4196783 | -0.467459088 | 0.188077117 | -2.485464985 | 0.012938231 | 0.025502482 |

|         |             |              |             |              |                |             |
|---------|-------------|--------------|-------------|--------------|----------------|-------------|
| Lonrf1  | 117.4687306 | -0.46752906  | 0.356696727 | -1.31071867  | 0.189952829    | 0.265681096 |
| Fam83f  | 65.5047744  | -0.467596907 | 0.401052292 | -1.165925033 | 0.243644757    | 0.327291452 |
| Robo4   | 202.1298011 | -0.46778315  | 0.307594601 | -1.520778155 | 0.128315518    | 0.190800686 |
| Rad21   | 1301.478311 | -0.467858086 | 0.178221588 | -2.625148225 | 0.008661125    | 0.017852118 |
| Aqp3    | 16.35043443 | -0.467951956 | 0.565782252 | -0.827088432 | 0.40818694     | 0.500713173 |
| Srf     | 328.8316485 | -0.4679575   | 0.157308534 | -2.974775039 | 0.002932035    | 0.00670494  |
| Dcst1   | 4.801540723 | -0.467958121 | 1.175394834 | -0.398128448 | 0.690535505    | 0.760185811 |
| Cirbp   | 814.7509694 | -0.468099714 | 0.242024514 | -1.93410042  | 0.053100782    | 0.088881899 |
| Smyd2   | 558.7366672 | -0.468161301 | 0.222841266 | -2.100873461 | 0.035652076    | 0.062620707 |
| Cnp     | 411.4590332 | -0.468224926 | 0.212382721 | -2.204628153 | 0.027480199    | 0.04981206  |
| Gm4366  | 1.531438732 | -0.468483598 | 2.454919089 | -0.190834639 | 0.848655149 NA |             |
| Axin1   | 439.8328163 | -0.468693823 | 0.241194741 | -1.943217425 | 0.051989894    | 0.08731393  |
| Gm10073 | 2.888064734 | -0.469026606 | 1.064976361 | -0.440410345 | 0.659639934    | 0.734091102 |
| Rras    | 646.4313805 | -0.469115892 | 0.174499473 | -2.68835133  | 0.00718058     | 0.015086829 |
| Srnc    | 365.9126523 | -0.46913635  | 0.233695855 | -2.007465431 | 0.044700128    | 0.076533874 |
| Rimk1a  | 0.59773546  | -0.469189474 | 2.542737975 | -0.184521362 | 0.853604471 NA |             |
| Vta1    | 313.4898732 | -0.469878381 | 0.191778819 | -2.450105726 | 0.014281427    | 0.027860141 |
| Chrac1  | 338.0873984 | -0.470161332 | 0.195660984 | -2.402938606 | 0.016263918    | 0.031283681 |
| Cep164  | 323.6145054 | -0.470287266 | 0.221015176 | -2.127850562 | 0.033349476    | 0.05909861  |
| Phf14   | 620.2737925 | -0.470470685 | 0.203467937 | -2.312248835 | 0.020763974    | 0.038856667 |
| Zfp324  | 99.98156266 | -0.47062437  | 0.300864629 | -1.564239609 | 0.117761308    | 0.177553267 |
| My19    | 76.31598727 | -0.470845506 | 0.361516495 | -1.302417765 | 0.192773613    | 0.268870535 |
| Ppp2r5e | 994.0319979 | -0.471126716 | 0.236172504 | -1.994841517 | 0.046060168    | 0.078664971 |
| Klf2    | 125.3472809 | -0.471541227 | 0.277739683 | -1.697781252 | 0.089549056    | 0.140664544 |
| Slc35a4 | 493.3130518 | -0.471572875 | 0.20947461  | -2.251217346 | 0.024371775    | 0.044806429 |
| Rcor2   | 8.102079193 | -0.472077469 | 0.771302774 | -0.612052083 | 0.540503299    | 0.627434308 |
| Icos    | 11.95773814 | -0.472228775 | 0.76278436  | -0.61908555  | 0.535860002    | 0.622977449 |
| Rpl13a  | 9787.435195 | -0.472233577 | 0.174364074 | -2.708319246 | 0.006762494    | 0.014273492 |
| Extl3   | 630.5092501 | -0.472279059 | 0.14247787  | -3.314753792 | 0.000917239    | 0.002331805 |
| Zfp266  | 519.1103653 | -0.472432309 | 0.216372344 | -2.183422798 | 0.029004689    | 0.052220079 |
| Caln3   | 1120.903853 | -0.47274954  | 0.187455839 | -2.52192486  | 0.011671464    | 0.023318307 |
| Gm2693  | 1.790443043 | -0.472873571 | 1.444123473 | -0.327446773 | 0.743329995    | 0.803467522 |
| Ift140  | 203.1298519 | -0.472915953 | 0.208553173 | -2.267603729 | 0.02335337     | 0.043180939 |
| Sp1     | 902.7413856 | -0.472982288 | 0.135405428 | -3.493082184 | 0.00047748     | 0.001280892 |
| Parp1   | 869.2345708 | -0.473094823 | 0.139737636 | -3.385593435 | 0.000710245    | 0.001841001 |
| Ddx52   | 517.8309291 | -0.473594932 | 0.17188058  | -2.755371975 | 0.005862544    | 0.012559017 |
| Gipc3   | 7.577227594 | -0.473667977 | 0.763550254 | -0.620349446 | 0.535027748    | 0.622222051 |
| Ep300   | 937.2567688 | -0.473789656 | 0.227131267 | -2.085972846 | 0.036981083    | 0.064752779 |
| Gm9531  | 140.7305333 | -0.473833386 | 0.321405266 | -1.474255204 | 0.140412891    | 0.205708861 |
| Fundc1  | 181.8862019 | -0.473877972 | 0.232986032 | -2.033932974 | 0.041958354    | 0.072362662 |
| Rpl13   | 5431.360731 | -0.473889432 | 0.178453717 | -2.655531301 | 0.007918358    | 0.016474515 |
| Ap2b1   | 1225.787774 | -0.473937999 | 0.148986082 | -3.181089085 | 0.001467225    | 0.003574343 |
| Irgm2   | 865.8069923 | -0.474036398 | 0.266571769 | -1.778269318 | 0.075359633    | 0.120688682 |
| Tspan2  | 19.19876902 | -0.474200227 | 0.440412906 | -1.076717372 | 0.281606549    | 0.369351319 |
| Tsc22d1 | 2813.712147 | -0.474305108 | 0.30194102  | -1.5708535   | 0.116216682    | 0.175659366 |
| Rnf166  | 304.9301777 | -0.474606738 | 0.193130499 | -2.457440639 | 0.013993093    | 0.027354003 |
| Tspyl2  | 293.1988868 | -0.475192298 | 0.251847255 | -1.886827385 | 0.059183546    | 0.097642761 |
| Erich1  | 72.4540144  | -0.475854037 | 0.279316716 | -1.703636085 | 0.088449096    | 0.139116171 |
| Zfp408  | 299.2999219 | -0.47635179  | 0.219883263 | -2.166384938 | 0.030281784    | 0.05423869  |
| Cdk9    | 1075.04776  | -0.476460952 | 0.156233263 | -3.049676766 | 0.002290878    | 0.005353651 |
| Itpka   | 21.65830542 | -0.476871811 | 0.490296101 | -0.972620036 | 0.330742181    | 0.422865809 |
| Gm48943 | 3.584277319 | -0.477032934 | 1.265492257 | -0.376954447 | 0.706207458    | 0.772500786 |
| Iqank1  | 27.37434743 | -0.477189734 | 0.398740492 | -1.196742602 | 0.231406896    | 0.313819487 |
| Fkbp7   | 79.36548717 | -0.477215657 | 0.284541345 | -1.677139951 | 0.093515118    | 0.145806268 |
| Igflr1  | 19.30871206 | -0.477273978 | 0.565886486 | -0.843409394 | 0.39899952     | 0.491839755 |
| Olfr748 | 2.661989288 | -0.4774589   | 1.425011864 | -0.335056088 | 0.737582777    | 0.79902848  |
| Lars    | 793.9862942 | -0.47783254  | 0.188314712 | -2.537414819 | 0.011167454    | 0.022429637 |
| Rc3h1   | 538.0057881 | -0.478594781 | 0.150389813 | -3.182361697 | 0.001460793    | 0.003560199 |
| Zfp322a | 357.6878695 | -0.479511809 | 0.181576321 | -2.640827875 | 0.008270372    | 0.017125387 |
| Naa40   | 292.0074387 | -0.479697944 | 0.16672563  | -2.877169784 | 0.004012596    | 0.008905968 |
| Clmn    | 3255.859706 | -0.47986161  | 0.21587825  | -2.222834447 | 0.026226965    | 0.047794474 |
| Arl9    | 3.799421898 | -0.479968109 | 1.143478253 | -0.419743976 | 0.674672495    | 0.746338116 |
| Vps26c  | 404.4144377 | -0.480043147 | 0.165942564 | -2.892827113 | 0.003817914    | 0.008514887 |
| Arid2   | 649.6636424 | -0.48049216  | 0.193643233 | -2.48132688  | 0.013089428    | 0.025764757 |
| Kdm8    | 56.58609689 | -0.480616176 | 0.407777262 | -1.178624267 | 0.238547824    | 0.321930619 |
| Zfp142  | 198.7000319 | -0.480891679 | 0.213027714 | -2.257413693 | 0.023982237    | 0.044177744 |

|               |             |              |             |              |             |             |
|---------------|-------------|--------------|-------------|--------------|-------------|-------------|
| AC119928.2    | 59.05981927 | -0.481077668 | 0.366223024 | -1.313619396 | 0.188974318 | 0.264588878 |
| Txnrd1        | 2787.073418 | -0.481205454 | 0.259099867 | -1.857219999 | 0.063279861 | 0.103511329 |
| Rims3         | 12.75759393 | -0.481232039 | 0.636828089 | -0.755670247 | 0.449846927 | 0.540984087 |
| Mettl121a     | 187.7078234 | -0.481269395 | 0.332724237 | -1.446451268 | 0.148050671 | 0.215426469 |
| Zc3h3         | 235.2128623 | -0.481303692 | 0.191060298 | -2.519119337 | 0.011764878 | 0.023482921 |
| Olfr525       | 1.028636203 | -0.481559377 | 2.565054014 | -0.187738494 | 0.851081653 | NA          |
| Vsig10l       | 54.78014911 | -0.481577636 | 0.518663011 | -0.92849813  | 0.353149237 | 0.44556603  |
| Tmem67        | 84.13204772 | -0.481657559 | 0.237265922 | -2.03003261  | 0.042353225 | 0.072977143 |
| Ly6k          | 2.876843877 | -0.481855753 | 1.564604575 | -0.307972865 | 0.75810298  | 0.815866398 |
| Ptprg         | 501.5760454 | -0.482002132 | 0.203217752 | -2.371850531 | 0.017699249 | 0.033732454 |
| Ccl21a        | 45.70206795 | -0.482207126 | 0.535446319 | -0.900570438 | 0.367816758 | 0.460189351 |
| Vnn1          | 1204.266616 | -0.482278056 | 0.352587879 | -1.367823697 | 0.171367268 | 0.243476055 |
| Prmt5         | 393.951839  | -0.482354092 | 0.165797522 | -2.909296152 | 0.003622435 | 0.008119284 |
| Med23         | 324.7149398 | -0.482523496 | 0.151001064 | -3.195497316 | 0.001395901 | 0.003420629 |
| Esrp1         | 7.926470074 | -0.482600693 | 0.976462846 | -0.494233545 | 0.621141252 | 0.700483963 |
| Eml4          | 390.6052141 | -0.482707443 | 0.169104592 | -2.854490446 | 0.004310593 | 0.009517807 |
| Gm14326       | 74.9605816  | -0.482873701 | 0.489871016 | -0.985716004 | 0.324272494 | 0.415591451 |
| Gss           | 2127.098918 | -0.483070944 | 0.223968747 | -2.156867647 | 0.031015978 | 0.055454683 |
| Mtrr          | 137.1846949 | -0.483225579 | 0.299336126 | -1.614324289 | 0.106457104 | 0.162725788 |
| Ppt1          | 579.0960927 | -0.483639678 | 0.182557943 | -2.649239312 | 0.008067318 | 0.016755805 |
| Gm45855       | 3.409406968 | -0.483657497 | 1.139232883 | -0.424546644 | 0.671167196 | 0.743608955 |
| Hemgn         | 1.276116033 | -0.483694571 | 2.002990371 | -0.241486219 | 0.809178296 | NA          |
| Fbxo32        | 82.30723335 | -0.483742666 | 0.299818251 | -1.613453029 | 0.10664612  | 0.163000095 |
| Tgm1          | 189.5278053 | -0.484033245 | 0.307855085 | -1.572276273 | 0.115886493 | 0.175284618 |
| Adcy6         | 1053.257339 | -0.484263826 | 0.157194781 | -3.080660966 | 0.002065417 | 0.004868809 |
| Phc2          | 775.0941051 | -0.484362136 | 0.16928348  | -2.861248698 | 0.004219759 | 0.009332959 |
| Il4ra         | 822.9007086 | -0.484768191 | 0.263298218 | -1.841137376 | 0.06560143  | 0.106827125 |
| Gm15500       | 6552.474621 | -0.484922362 | 0.124448813 | -3.896560779 | 9.76E-05    | 0.000295548 |
| Selp          | 29.17589651 | -0.484991409 | 0.548249867 | -0.884617468 | 0.376362982 | 0.468440981 |
| CT571246.1    | 13.72324659 | -0.485014399 | 0.5844033   | -0.829930972 | 0.406577812 | 0.499124256 |
| Ints10        | 165.790644  | -0.485191655 | 0.255290743 | -1.900545427 | 0.057361579 | 0.094987878 |
| Tspan10       | 0.701649427 | -0.4854162   | 2.532148489 | -0.191701317 | 0.847976174 | NA          |
| Itga7         | 276.9348697 | -0.485508053 | 0.193446091 | -2.509784773 | 0.012080477 | 0.024017255 |
| Esyt2         | 818.8645585 | -0.485692574 | 0.190512391 | -2.549401495 | 0.010790799 | 0.021729452 |
| Uba6          | 139.7134702 | -0.486356154 | 0.249869004 | -1.946444522 | 0.051601366 | 0.086755433 |
| Faap24        | 45.46595956 | -0.486596659 | 0.309971255 | -1.569812205 | 0.116458807 | 0.175916157 |
| Foxp1         | 650.2471171 | -0.487303527 | 0.143594882 | -3.393599544 | 0.000689805 | 0.001792651 |
| Gm5619        | 2.568783598 | -0.487333884 | 1.487709511 | -0.32757328  | 0.743234327 | 0.803415054 |
| Tmc3          | 5.608983385 | -0.48743786  | 1.053328153 | -0.462759737 | 0.643536594 | 0.720118927 |
| Wdr62         | 104.3718275 | -0.487448615 | 0.222020416 | -2.195512574 | 0.02812685  | 0.050838267 |
| Smad4         | 581.1883213 | -0.487613014 | 0.17666071  | -2.76016673  | 0.005777187 | 0.012397971 |
| 1110038F14Rik | 174.8258224 | -0.487708186 | 0.210210477 | -2.320094565 | 0.020335762 | 0.038145482 |
| Nrp2          | 212.4035535 | -0.487864461 | 0.222509172 | -2.192558874 | 0.028339177 | 0.051194902 |
| Gsk3b         | 857.5695044 | -0.488186094 | 0.156353609 | -3.122320591 | 0.001794314 | 0.00428364  |
| Pars2         | 72.55575315 | -0.488385423 | 0.311414962 | -1.56827861  | 0.116816126 | 0.176381693 |
| Prr12         | 397.4481984 | -0.488571122 | 0.176928786 | -2.761399849 | 0.005755417 | 0.012354362 |
| Zfp775        | 85.12452903 | -0.489153434 | 0.29351672  | -1.666526643 | 0.095628566 | 0.148635312 |
| 9130019O22Rik | 56.80886575 | -0.489233744 | 0.393861649 | -1.242146184 | 0.214182631 | 0.293779508 |
| Rps5          | 5520.341451 | -0.489286222 | 0.169644824 | -2.884180084 | 0.003924343 | 0.008728271 |
| Tsnax         | 795.8689988 | -0.489302076 | 0.164321444 | -2.977712853 | 0.002904079 | 0.006643685 |
| Ms4a1         | 12.62925186 | -0.489351575 | 0.593469249 | -0.824560962 | 0.409620892 | 0.501920288 |
| Dnajc5        | 1525.161139 | -0.489429609 | 0.253342335 | -1.931890336 | 0.053373043 | 0.089267501 |
| Tcf23         | 2.862368999 | -0.489609074 | 1.200755804 | -0.407750746 | 0.683456678 | 0.75409808  |
| BC029722      | 407.1752602 | -0.489655352 | 0.156791783 | -3.122965638 | 0.001790386 | 0.004277119 |
| Rpl32         | 5377.528774 | -0.489988334 | 0.121461725 | -4.034096623 | 5.48E-05    | 0.000172439 |
| Gfp           | 317.8262471 | -0.490235236 | 0.338148303 | -1.449763999 | 0.147124342 | 0.214337359 |
| Vgin1         | 671.0573249 | -0.490346733 | 0.453613115 | -1.080980061 | 0.279705983 | 0.367225845 |
| Wasf3         | 3.880912024 | -0.49038355  | 1.143222489 | -0.428948481 | 0.667960718 | 0.740788077 |
| Ptpa          | 1069.449358 | -0.490883626 | 0.123101031 | -3.987648382 | 6.67E-05    | 0.000207485 |
| Lgalsl        | 330.096954  | -0.491242812 | 0.217102412 | -2.262723879 | 0.023652716 | 0.043630329 |
| Tlk1          | 1061.997469 | -0.492048196 | 0.176771359 | -2.783528955 | 0.005377106 | 0.011618366 |
| Krt23         | 51.17031308 | -0.492443689 | 0.486174236 | -1.012895486 | 0.311110085 | 0.401894728 |
| Gm49355       | 4.02793496  | -0.492460581 | 1.396275469 | -0.352695863 | 0.724316461 | 0.788062227 |
| Bmt2          | 284.4112128 | -0.492527701 | 0.209838904 | -2.347170572 | 0.018916593 | 0.035764675 |
| Arsg          | 650.7573216 | -0.492650235 | 0.208943221 | -2.357818707 | 0.018382668 | 0.034859591 |
| Agbl5         | 246.8847372 | -0.493167661 | 0.241991841 | -2.037951607 | 0.041554773 | 0.071782933 |

|          |             |              |             |              |                |             |
|----------|-------------|--------------|-------------|--------------|----------------|-------------|
| Egfl7    | 480.3786676 | -0.493304344 | 0.232840163 | -2.118639407 | 0.034120953    | 0.060279171 |
| Got2-ps1 | 4.743144051 | -0.493705745 | 1.03209795  | -0.478351638 | 0.632399949    | 0.710595461 |
| Orai1    | 199.2867295 | -0.494214881 | 0.206826378 | -2.389515719 | 0.016870602    | 0.032297588 |
| Imp4     | 500.1028968 | -0.494287952 | 0.31377344  | -1.575302079 | 0.115186734    | 0.174318992 |
| Ctsb     | 11244.25547 | -0.494544018 | 0.201541563 | -2.453806598 | 0.014135298    | 0.027600339 |
| Fbxl16   | 15.96190651 | -0.494797614 | 0.661308007 | -0.74821053  | 0.454333181    | 0.545187025 |
| Gm15710  | 4.208713655 | -0.495080847 | 1.308856206 | -0.378254574 | 0.705241488    | 0.771691712 |
| Gm5345   | 47.67636718 | -0.495100323 | 0.375228636 | -1.319463058 | 0.187014353    | 0.262232331 |
| Aox2     | 2.744161281 | -0.495159931 | 1.21917553  | -0.406143265 | 0.684637338    | 0.755303005 |
| Rack1    | 7822.616434 | -0.49517307  | 0.13199242  | -3.751526553 | 0.000175761    | 0.000510021 |
| Galk1    | 1262.013002 | -0.495377073 | 0.274055001 | -1.807582683 | 0.070671475    | 0.114080798 |
| Snrpg    | 334.8905688 | -0.495648956 | 0.212703761 | -2.330231277 | 0.019793931    | 0.037241688 |
| Emd      | 308.5895936 | -0.496052488 | 0.18290038  | -2.712145755 | 0.006684919    | 0.014132503 |
| Galnt16  | 1.263347132 | -0.496127204 | 1.978072215 | -0.250813494 | 0.801958308 NA |             |
| Ackr2    | 50.324179   | -0.496367904 | 0.451584608 | -1.099169225 | 0.27169426     | 0.358279992 |
| Ncaph2   | 1072.091769 | -0.496547806 | 0.181170621 | -2.74077443  | 0.006129457    | 0.013061873 |
| Zfp59    | 66.9376013  | -0.496848242 | 0.269429513 | -1.844075046 | 0.065172204    | 0.106270276 |
| Fst      | 53.89453143 | -0.496856625 | 0.53724635  | -0.924820847 | 0.355059105    | 0.44754511  |
| Mcl1     | 3229.15339  | -0.497158516 | 0.131382954 | -3.784041251 | 0.000154302    | 0.000451751 |
| Zfp326   | 320.3881593 | -0.497468041 | 0.261450372 | -1.902724544 | 0.057076498    | 0.0945893   |
| Fndc5    | 11.43017986 | -0.497829137 | 0.82999053  | -0.599800984 | 0.548638877    | 0.634243953 |
| Vamp2    | 676.2479474 | -0.497923365 | 0.295212936 | -1.686658356 | 0.091669064    | 0.143439578 |
| Zfp114   | 3.139063263 | -0.498035237 | 1.255444729 | -0.396700249 | 0.691588516    | 0.761050931 |
| Ppp2r3c  | 263.6706057 | -0.498304369 | 0.198189892 | -2.514277415 | 0.011927657    | 0.023757763 |
| Patj     | 382.193029  | -0.498327164 | 0.154644609 | -3.222402436 | 0.001271205    | 0.003143986 |
| Cpne3    | 1003.667847 | -0.498333505 | 0.187160454 | -2.66260868  | 0.007753753    | 0.016163607 |
| Gm4450   | 2.088656036 | -0.498642268 | 1.688166559 | -0.295375042 | 0.767707397    | 0.823551202 |
| Iffo1    | 321.1213237 | -0.499018223 | 0.243469861 | -2.04960984  | 0.040402519    | 0.070019534 |
| Ptpn23   | 658.8805157 | -0.499083828 | 0.169818783 | -2.938920052 | 0.00329358     | 0.00745571  |
| Ano10    | 318.091448  | -0.499479088 | 0.189930586 | -2.629798069 | 0.00854356     | 0.01765248  |
| Socs2    | 806.5811798 | -0.499810177 | 0.301338329 | -1.658634593 | 0.097189447    | 0.150708176 |
| Lmf2     | 665.6436523 | -0.500007499 | 0.200457493 | -2.494331795 | 0.012619452    | 0.02496651  |
| Sypl     | 942.8665658 | -0.500043478 | 0.186401948 | -2.682608653 | 0.007305042    | 0.015314357 |
| Pes1     | 717.5576294 | -0.500068423 | 0.176616539 | -2.831379352 | 0.004634772    | 0.010149465 |
| Man1a2   | 673.8597198 | -0.500134045 | 0.171172441 | -2.921814058 | 0.003479992    | 0.007827802 |
| Mfsd5    | 378.8725795 | -0.500393365 | 0.166762069 | -3.000642586 | 0.002694106    | 0.006197425 |
| Ccdc181  | 125.750014  | -0.500499979 | 0.220765366 | -2.267112767 | 0.023383338    | 0.043212915 |
| Tmem239  | 0.605207932 | -0.500815364 | 2.974926426 | -0.168345462 | 0.866311511 NA |             |
| Katnbl1  | 189.0743586 | -0.500865445 | 0.226875872 | -2.207662895 | 0.027267781    | 0.049484898 |
| Tmem123  | 958.7699336 | -0.501472135 | 0.135875652 | -3.69066957  | 0.000223665    | 0.000636673 |
| Nkain4   | 8.298861804 | -0.501818947 | 0.997799734 | -0.502925516 | 0.61501664     | 0.695417105 |
| Cst3     | 3230.400825 | -0.502250103 | 0.120535429 | -4.166825521 | 3.09E-05       | 0.000101107 |
| Rpl39    | 2692.553765 | -0.502250683 | 0.180906883 | -2.776293938 | 0.005498248    | 0.011857539 |
| Gdf10    | 81.49799901 | -0.502443743 | 0.353131736 | -1.422822398 | 0.154787647    | 0.223742564 |
| Dnaaf1   | 0.606027473 | -0.502904363 | 2.973821228 | -0.169110489 | 0.865709735 NA |             |
| Mast2    | 702.9680674 | -0.502944195 | 0.219953478 | -2.286593509 | 0.02221956     | 0.041295003 |
| Rrm2b    | 104.1164335 | -0.5033201   | 0.338457979 | -1.487097756 | 0.136988994    | 0.201569858 |
| Depdc5   | 243.4524541 | -0.503356655 | 0.271729599 | -1.852417466 | 0.063965899    | 0.104513192 |
| Lhx4     | 1.075970098 | -0.50426456  | 1.937778098 | -0.260228228 | 0.794687732 NA |             |
| Scoc     | 280.4585864 | -0.504516616 | 0.180647741 | -2.792819961 | 0.005225076    | 0.011318565 |
| Gm17131  | 41.42361315 | -0.50462629  | 0.696898645 | -0.724102843 | 0.4690026      | 0.559481934 |
| Fgfr4    | 1221.207634 | -0.504629242 | 0.160774397 | -3.138741304 | 0.001696752    | 0.004077483 |
| Gm8000   | 1.078370983 | -0.504796089 | 2.159812294 | -0.233722203 | 0.815200649 NA |             |
| Sri      | 883.0055763 | -0.505024537 | 0.165946084 | -3.043304941 | 0.002339951    | 0.005457111 |
| Crybg1   | 488.1373985 | -0.505460885 | 0.207275878 | -2.438590008 | 0.014744686    | 0.028658923 |
| Armcx1   | 45.12543108 | -0.505770239 | 0.398556224 | -1.269005999 | 0.204438924    | 0.282597485 |
| Efcab11  | 35.54910525 | -0.50585798  | 0.445087892 | -1.136535029 | 0.255732714    | 0.340730961 |
| Lbx2     | 4.519709885 | -0.506586843 | 0.97634757  | -0.518859122 | 0.603858986    | 0.685437645 |
| Ptpn12   | 562.7043869 | -0.506663254 | 0.249156802 | -2.033511633 | 0.042000859    | 0.072414103 |
| Pbx2     | 552.3216002 | -0.506716219 | 0.23751251  | -2.133429598 | 0.032889501    | 0.058412357 |
| Kat6a    | 521.6373084 | -0.506889781 | 0.195122445 | -2.597803558 | 0.009382215    | 0.01917382  |
| Rab42    | 2.614073947 | -0.507399853 | 1.265731871 | -0.400874676 | 0.688512396    | 0.758694287 |
| Golph3l  | 186.6330046 | -0.50743804  | 0.202194466 | -2.50965346  | 0.012084969    | 0.024023386 |
| Rasa2    | 149.7648754 | -0.508548382 | 0.304117417 | -1.672210643 | 0.094482792    | 0.147126657 |
| Ccdc170  | 1.998917249 | -0.508961917 | 1.636910933 | -0.31092829  | 0.755855138    | 0.81411539  |
| Noxo1    | 32.19400195 | -0.50907819  | 0.388473714 | -1.310457239 | 0.190041201    | 0.265755262 |

|               |             |              |             |              |                |             |
|---------------|-------------|--------------|-------------|--------------|----------------|-------------|
| Vamp5         | 235.0857924 | -0.50931731  | 0.201690472 | -2.525242286 | 0.011561855    | 0.023137281 |
| Gm11585       | 2.649217427 | -0.509757711 | 1.956129541 | -0.260595068 | 0.794404793    | 0.845170551 |
| Wdr66         | 43.71536683 | -0.509908799 | 0.364197134 | -1.400090092 | 0.161486342    | 0.231599155 |
| Spata13       | 731.0861081 | -0.509921343 | 0.203305341 | -2.508155167 | 0.012136336    | 0.024108629 |
| Thada         | 171.3987276 | -0.510303259 | 0.223968579 | -2.27845916  | 0.022699235    | 0.042085542 |
| Trim63        | 2.766699647 | -0.510614398 | 1.283605987 | -0.397796835 | 0.690779951    | 0.760357477 |
| Ankib1        | 422.9381735 | -0.510806324 | 0.209124914 | -2.442589526 | 0.014582312    | 0.028392513 |
| Zmynd12       | 5.880109941 | -0.511058071 | 0.887983526 | -0.575526523 | 0.564935258    | 0.649336082 |
| Pla2r1        | 86.18654651 | -0.511227996 | 0.357618073 | -1.429536241 | 0.152850166    | 0.221298483 |
| Lancl2        | 145.3445968 | -0.51196791  | 0.252493428 | -2.027648459 | 0.042596139    | 0.073329192 |
| Slx4ip        | 87.48982183 | -0.512232525 | 0.286053475 | -1.790687998 | 0.073343377    | 0.11789156  |
| Lztr1         | 816.6067449 | -0.512356692 | 0.17711197  | -2.892840574 | 0.00381775     | 0.008514887 |
| Map3k13       | 322.538605  | -0.512698962 | 0.144449498 | -3.549330187 | 0.000386212    | 0.001053161 |
| Mbtps2        | 230.1254782 | -0.513254855 | 0.207180207 | -2.477335365 | 0.013236746    | 0.026027687 |
| Ttf2          | 127.6690646 | -0.513543554 | 0.3058315   | -1.679171549 | 0.093118615    | 0.145278271 |
| Rnps1         | 758.1499765 | -0.513545269 | 0.144938448 | -3.543195579 | 0.000395309    | 0.001075353 |
| Gm5513        | 1.107221697 | -0.513832875 | 1.827264726 | -0.281203302 | 0.778554472 NA |             |
| G2e3          | 199.2617683 | -0.51386407  | 0.253570946 | -2.026510046 | 0.042712544    | 0.073522158 |
| Cadm1         | 670.4020206 | -0.513995052 | 0.301191522 | -1.706538908 | 0.087907789    | 0.138392463 |
| Samd1         | 78.42608362 | -0.514152696 | 0.341898801 | -1.503815442 | 0.132628894    | 0.196255306 |
| Srsf3         | 1807.998388 | -0.514175025 | 0.172529766 | -2.980210527 | 0.002880503    | 0.006594617 |
| Zfp385a       | 455.0656248 | -0.514319267 | 0.200660786 | -2.563127936 | 0.010373382    | 0.020988062 |
| Zfp637        | 361.9942096 | -0.515037137 | 0.163025349 | -3.159245718 | 0.001581781    | 0.003827164 |
| Nisch         | 4711.379769 | -0.515697919 | 0.160064753 | -3.221808109 | 0.001273844    | 0.003149144 |
| Pcgf5         | 348.8651267 | -0.515912934 | 0.180659291 | -2.855723227 | 0.004293893    | 0.009484618 |
| Irak4         | 178.8149653 | -0.516272112 | 0.241423201 | -2.138452769 | 0.032480014    | 0.05775128  |
| Nudcd1        | 366.1683657 | -0.517936829 | 0.271451522 | -1.908026985 | 0.056387729    | 0.093584307 |
| Crat          | 942.4026441 | -0.517960297 | 0.363463214 | -1.425069378 | 0.154137147    | 0.22297243  |
| Calm2         | 2751.010315 | -0.518098779 | 0.187813093 | -2.758587118 | 0.005805183    | 0.012453348 |
| Styk          | 332.7506804 | -0.518210932 | 0.226754094 | -2.285343221 | 0.022292711    | 0.041412894 |
| Spata7        | 63.10824282 | -0.518336048 | 0.355398733 | -1.458463411 | 0.144712853    | 0.211221295 |
| Capns1        | 3382.205163 | -0.518524098 | 0.191563513 | -2.706799896 | 0.006793519    | 0.014326561 |
| Snx17         | 402.851304  | -0.518629792 | 0.133513455 | -3.884475845 | 0.000102551    | 0.000309541 |
| Kpna2-ps      | 5.196764571 | -0.518708577 | 0.822010566 | -0.63102422  | 0.528024688    | 0.616137227 |
| Rilpl2        | 172.5439112 | -0.518834727 | 0.217094452 | -2.389903203 | 0.016852814    | 0.032270782 |
| Sult1c2       | 130.4311091 | -0.518906052 | 0.623532768 | -0.83220334  | 0.405294179    | 0.49790698  |
| Nfxl1         | 354.3149369 | -0.519028615 | 0.243293685 | -2.133341912 | 0.032896688    | 0.058419036 |
| Gm20695       | 2.682495202 | -0.519105307 | 1.318272049 | -0.393777072 | 0.693745634    | 0.763030681 |
| Serpina3n     | 8054.304067 | -0.519987355 | 0.896524574 | -0.58000346  | 0.561912285    | 0.64660686  |
| Ncdn          | 306.4778865 | -0.520070466 | 0.213944704 | -2.430863943 | 0.01506287     | 0.029210761 |
| Cbx3          | 1182.533679 | -0.520259044 | 0.199820818 | -2.603627831 | 0.009224286    | 0.018880493 |
| Slc17a9       | 176.6214961 | -0.520266013 | 0.359396228 | -1.447611223 | 0.147725811    | 0.215121689 |
| Spint2        | 2508.239323 | -0.520461045 | 0.14844407  | -3.506108697 | 0.000454709    | 0.001223467 |
| Nudt21        | 539.2727998 | -0.520751033 | 0.17329482  | -3.005000571 | 0.002655804    | 0.00661757  |
| Tcerg1        | 519.0460854 | -0.521463269 | 0.190816041 | -2.732806248 | 0.006279726    | 0.013350252 |
| Nbeal1        | 629.5346967 | -0.522086762 | 0.181952631 | -2.869355389 | 0.004113094    | 0.009116501 |
| Spsb3         | 372.0675938 | -0.522094879 | 0.153743814 | -3.395875668 | 0.000684094    | 0.001778896 |
| Eef1akmt2     | 96.82426498 | -0.522110642 | 0.236235659 | -2.210126293 | 0.027096399    | 0.049205305 |
| Ryr1          | 5.05127289  | -0.522236533 | 1.036644633 | -0.503775852 | 0.614418899    | 0.694833392 |
| Kif2a         | 224.1645543 | -0.523021924 | 0.180012823 | -2.905470376 | 0.003667016    | 0.00821057  |
| Rsl1          | 66.55537684 | -0.523037568 | 0.301536761 | -1.734573145 | 0.08281644     | 0.131201065 |
| Jam2          | 218.217086  | -0.52324686  | 0.326181621 | -1.604158011 | 0.108679227    | 0.165721241 |
| Snrpe         | 524.3484013 | -0.523344288 | 0.190434655 | -2.748156776 | 0.005993134    | 0.012804983 |
| Ncmap         | 21.82396389 | -0.523444888 | 0.645429905 | -0.811001914 | 0.417364572    | 0.509070087 |
| Zfp418        | 26.33564194 | -0.523468231 | 0.382351805 | -1.369074825 | 0.170975887    | 0.243041517 |
| Lsm14a        | 660.917601  | -0.523964432 | 0.19341802  | -2.708974233 | 0.006749158    | 0.014250638 |
| Inpp5e        | 322.8035098 | -0.524080425 | 0.215778771 | -2.428785846 | 0.015149478    | 0.029365355 |
| Rps14         | 5367.421654 | -0.524120895 | 0.111508536 | -4.700275993 | 2.60E-06       | 9.91E-06    |
| Wars          | 495.2781957 | -0.524194402 | 0.138959301 | -3.772287263 | 0.000161758    | 0.000472281 |
| Usp49         | 150.9746057 | -0.524260216 | 0.356534129 | -1.470434872 | 0.141444013    | 0.20699953  |
| Nipsnap2      | 411.1635508 | -0.524477131 | 0.242538495 | -2.162449017 | 0.030583583    | 0.054738994 |
| G530012D18Rik | 3.801143582 | -0.524820958 | 1.109851776 | -0.472874819 | 0.636302491    | 0.713757393 |
| Xpc           | 409.8392119 | -0.524966215 | 0.153579191 | -3.418211869 | 0.00063034     | 0.001654    |
| Sap25         | 57.04869845 | -0.524991436 | 0.405003339 | -1.296264464 | 0.194884387    | 0.271392667 |
| Nup43         | 93.29370156 | -0.525108699 | 0.261836364 | -2.005484231 | 0.044911305    | 0.076864564 |
| Snap23        | 498.4792028 | -0.525284167 | 0.179960151 | -2.918891563 | 0.003512784    | 0.007894997 |



|               |             |              |             |              |                |             |
|---------------|-------------|--------------|-------------|--------------|----------------|-------------|
| Mia           | 6.536999647 | -0.525377963 | 1.026602952 | -0.511763542 | 0.608816509    | 0.689962364 |
| Rpl13-ps1     | 0.590793275 | -0.525555076 | 2.889927    | -0.181857561 | 0.85569451 NA  |             |
| Capn3         | 26.64894754 | -0.527000709 | 0.506761713 | -1.039937894 | 0.298368756    | 0.387904411 |
| Larp7         | 198.9070116 | -0.527522161 | 0.26318903  | -2.004347067 | 0.045032895    | 0.077041726 |
| Ehd1          | 853.2440429 | -0.527805147 | 0.230134607 | -2.293462739 | 0.021821378    | 0.040630281 |
| Prss39        | 0.248311922 | -0.528047253 | 3.63335595  | -0.145333202 | 0.884447802 NA |             |
| Zfp867        | 106.274983  | -0.528146495 | 0.252858503 | -2.088703719 | 0.036734402    | 0.064349371 |
| Adcyap1r1     | 33.36740825 | -0.528421668 | 0.435544564 | -1.213243632 | 0.225036687    | 0.306448234 |
| Cenpk         | 37.12093618 | -0.528625724 | 0.519759175 | -1.017058957 | 0.309125384    | 0.399754952 |
| Atrnl1        | 546.7928837 | -0.528764863 | 0.22692203  | -2.330160997 | 0.019797644    | 0.037244563 |
| Cables1       | 46.80713723 | -0.529089259 | 0.347181506 | -1.523955768 | 0.127519761    | 0.189832071 |
| 4930447C04Rik | 0.611029853 | -0.529194238 | 2.477201405 | -0.213625843 | 0.830838845 NA |             |
| Cd300c        | 1.962804217 | -0.52928285  | 1.535932204 | -0.344600399 | 0.730394806    | 0.793277471 |
| Eps811        | 42.20369493 | -0.529976131 | 0.559073457 | -0.947954378 | 0.34315268     | 0.435564507 |
| Mmp27         | 8.360661381 | -0.530199965 | 0.815793775 | -0.649919111 | 0.515744473    | 0.604372545 |
| Mex3c         | 441.610108  | -0.530244009 | 0.198786478 | -2.667404821 | 0.007643954    | 0.015958134 |
| Irak1bp1      | 48.60105419 | -0.530348491 | 0.451247569 | -1.175293846 | 0.239877176    | 0.323300347 |
| Sp4           | 75.99715191 | -0.530360897 | 0.258908248 | -2.048451149 | 0.040515814    | 0.070201606 |
| Chd6          | 723.6147744 | -0.530659158 | 0.223298232 | -2.376459283 | 0.01747969     | 0.033343825 |
| Rrp7a         | 559.3879296 | -0.53073278  | 0.160254017 | -3.311822    | 0.000926905    | 0.00235376  |
| Gm10025       | 2.663248604 | -0.53073664  | 1.380036234 | -0.384581671 | 0.700547376    | 0.768562016 |
| Akap7         | 131.3966942 | -0.53074413  | 0.213265377 | -2.488655857 | 0.012822702    | 0.025304225 |
| Gm19035       | 0.48875833  | -0.530874537 | 3.044275429 | -0.174384529 | 0.861563272 NA |             |
| Inafm1        | 156.9796571 | -0.531126105 | 0.218878632 | -2.426578153 | 0.015241967    | 0.029521138 |
| Rps10         | 4892.784425 | -0.531218816 | 0.125714969 | -4.225581256 | 2.38E-05       | 7.95E-05    |
| Abca7         | 223.4755344 | -0.531725789 | 0.186351422 | -2.853349774 | 0.004326098    | 0.009547649 |
| Eif2ak2       | 374.1477376 | -0.531752931 | 0.16064117  | -3.31019084  | 0.000932324    | 0.002366273 |
| Plekhh2       | 302.5384007 | -0.531754564 | 0.208569317 | -2.549534003 | 0.010786699    | 0.021726329 |
| Gm3411        | 1.074420387 | -0.531866229 | 3.188406564 | -0.16681255  | 0.867517544 NA |             |
| Degs1         | 1437.105064 | -0.531962178 | 0.161598792 | -3.291869769 | 0.00095237     | 0.002509881 |
| Rnls          | 5.35144336  | -0.532316349 | 0.821588979 | -0.647910771 | 0.517042664    | 0.605615573 |
| 4930402H24Rik | 916.5387043 | -0.532680652 | 0.188450422 | -2.826635489 | 0.004703984    | 0.010283857 |
| 1700001O22Rik | 1.79889534  | -0.532726263 | 1.734511909 | -0.307133241 | 0.758741957    | 0.816347926 |
| Yeats2        | 412.4231021 | -0.533778871 | 0.149007731 | -3.582222663 | 0.000340683    | 0.000936316 |
| Gm10275       | 6688.432163 | -0.533886035 | 0.16441826  | -3.247121302 | 0.001165787    | 0.002904755 |
| Gm4962        | 0.592013686 | -0.533902436 | 2.888747174 | -0.184821448 | 0.853369085 NA |             |
| Brms1l        | 135.7737703 | -0.534359943 | 0.279316147 | -1.913100799 | 0.05573515     | 0.092609438 |
| Pxn           | 1156.297705 | -0.534373481 | 0.195069449 | -2.739401192 | 0.006155121    | 0.013108371 |
| Eif2ak4       | 276.8421569 | -0.534683859 | 0.17711447  | -3.018860396 | 0.002537274    | 0.005870718 |
| Aqp1          | 784.7797358 | -0.534870042 | 0.340677203 | -1.57002006  | 0.116410444    | 0.175874269 |
| Gm6611        | 1.608385155 | -0.535156439 | 1.688695923 | -0.316905152 | 0.751315572 NA |             |
| Smyd3         | 98.70715139 | -0.535319102 | 0.44662067  | -1.198599029 | 0.230683896    | 0.313063132 |
| Crkl          | 346.6395628 | -0.535322453 | 0.206149899 | -2.596763114 | 0.00941068     | 0.019225078 |
| Pald1         | 338.2019808 | -0.536017073 | 0.222827252 | -2.405527461 | 0.016149138    | 0.031101503 |
| Gm10134       | 7.291958757 | -0.536432851 | 0.771176353 | -0.695603346 | 0.48667727     | 0.576799227 |
| Tub           | 2.639308628 | -0.536639817 | 1.290625372 | -0.415798286 | 0.677557614    | 0.748849413 |
| Capn2         | 1465.512125 | -0.536655217 | 0.209905994 | -2.556645505 | 0.010568686    | 0.021324944 |
| Lcor          | 138.1112927 | -0.53707539  | 0.342430082 | -1.568423506 | 0.116782329    | 0.176357972 |
| Gm4462        | 1.313187941 | -0.53708869  | 1.650909354 | -0.325329001 | 0.744932084 NA |             |
| Trb1-3        | 0.296699045 | -0.537181831 | 3.634643494 | -0.147794916 | 0.882504622 NA |             |
| Adamts14      | 111.2256652 | -0.537188467 | 0.415721584 | -1.29218325  | 0.196293691    | 0.272927393 |
| Shisa3        | 5.391964471 | -0.537332687 | 0.999781429 | -0.537450158 | 0.590956705    | 0.673753086 |
| Osbpl6        | 12.10181219 | -0.537357853 | 0.725778963 | -0.74038775  | 0.45906475     | 0.54962679  |
| Gm7638        | 2.535410992 | -0.537598789 | 1.314782648 | -0.408887956 | 0.682621888    | 0.753420818 |
| Pigf          | 135.4309058 | -0.537763172 | 0.380022726 | -1.415081615 | 0.157044568    | 0.226390647 |
| Tmem125       | 161.5641496 | -0.537763271 | 0.283751034 | -1.895194052 | 0.058066698    | 0.096062209 |
| Unk           | 393.1620666 | -0.537886921 | 0.159618462 | -3.369829001 | 0.000752148    | 0.001941645 |
| Krtcap3       | 45.8175641  | -0.537951956 | 0.471990451 | -1.13975178  | 0.254389728    | 0.339239368 |
| 4931428F04Rik | 95.27724836 | -0.538183362 | 0.274891371 | -1.957803772 | 0.050253043    | 0.084747638 |
| Usp31         | 186.9489483 | -0.538342101 | 0.332102552 | -1.621011639 | 0.105015143    | 0.160940143 |
| Tchp          | 112.5572698 | -0.538477729 | 0.326741031 | -1.648026047 | 0.099347326    | 0.153532567 |
| Elfnb1        | 362.5589431 | -0.539220651 | 0.213502051 | -2.525599396 | 0.01155011     | 0.023125696 |
| Olfr767       | 15.92378208 | -0.539498854 | 0.472514013 | -1.141762654 | 0.25355269     | 0.338345673 |
| Rcan1         | 388.9849924 | -0.539802987 | 0.253633032 | -2.128283457 | 0.033313589    | 0.059060947 |
| Capza2        | 1300.523174 | -0.539946522 | 0.16163222  | -3.340587179 | 0.000836014    | 0.002141282 |
| Gpr162        | 17.11105596 | -0.540025076 | 0.542788275 | -0.994909249 | 0.319780404    | 0.41124214  |

|               |             |              |             |              |             |             |
|---------------|-------------|--------------|-------------|--------------|-------------|-------------|
| Fam122b       | 66.1769057  | -0.540193421 | 0.327598909 | -1.64894756  | 0.099158379 | 0.153287272 |
| DnaI4         | 191.4334851 | -0.541140773 | 0.181357903 | -2.983827917 | 0.002846668 | 0.006521973 |
| Gm43580       | 0.607687032 | -0.54118913  | 2.197084904 | -0.246321446 | 0.80543341  | NA          |
| CxcI9         | 146.7762221 | -0.541193602 | 0.850918261 | -0.636011268 | 0.524769078 | 0.613009678 |
| Capza1        | 744.7029252 | -0.541272534 | 0.225589462 | -2.39936976  | 0.016423321 | 0.031554691 |
| Ttll12        | 251.9325892 | -0.541519368 | 0.240933333 | -2.247590077 | 0.024602341 | 0.045191327 |
| Ap2a2         | 1956.505984 | -0.541689358 | 0.211820912 | -2.557298773 | 0.010548857 | 0.021287514 |
| Dgke          | 104.5305927 | -0.542201586 | 0.253297336 | -2.140573586 | 0.032308441 | 0.057500177 |
| Uba2          | 682.483079  | -0.542243308 | 0.175498547 | -3.089731029 | 0.002003378 | 0.004733037 |
| Lrch4         | 228.9663404 | -0.542538432 | 0.325739109 | -1.665561234 | 0.095800838 | 0.148852778 |
| Heatr5a       | 330.971823  | -0.542828989 | 0.159578175 | -3.401649313 | 0.000669805 | 0.001744666 |
| Ctf1          | 104.9256344 | -0.543165731 | 0.28474606  | -1.907544325 | 0.056450137 | 0.093660529 |
| Slc19a1       | 176.376574  | -0.543624811 | 0.361274098 | -1.504743391 | 0.132390063 | 0.195943716 |
| Aqr           | 521.00583   | -0.543739786 | 0.230785722 | -2.356037378 | 0.018471059 | 0.035007739 |
| Hlx           | 95.78216456 | -0.543877161 | 0.342473968 | -1.588083219 | 0.112267522 | 0.170552194 |
| Gm21541       | 23.0350596  | -0.544338289 | 3.084386291 | -0.176481879 | 0.859915383 | 0.896078084 |
| Cfap53        | 4.976718754 | -0.544397589 | 1.056029308 | -0.515513712 | 0.60619409  | 0.687584621 |
| Clnk          | 1.281261876 | -0.544699193 | 1.680150314 | -0.324196703 | 0.745789118 | NA          |
| Usp35         | 77.08351557 | -0.544995516 | 0.333932396 | -1.632053443 | 0.102668228 | 0.157840018 |
| Stat3         | 2350.824652 | -0.545506416 | 0.235998262 | -2.311484886 | 0.020806087 | 0.038918386 |
| Slc4a2        | 776.326465  | -0.545578456 | 0.198551345 | -2.747795324 | 0.005999745 | 0.0128175   |
| Pwp1          | 331.0975326 | -0.545590584 | 0.182151661 | -2.995254501 | 0.002742159 | 0.006300315 |
| H1f6          | 0.605404642 | -0.545992366 | 2.468747841 | -0.221161658 | 0.824966562 | NA          |
| Lrrc59        | 1883.012116 | -0.546001939 | 0.224380486 | -2.433375325 | 0.014958786 | 0.029025425 |
| Slc45a3       | 1055.058792 | -0.546147201 | 0.312396027 | -1.748252709 | 0.080420278 | 0.127796877 |
| Gfra2         | 12.89685132 | -0.546189212 | 0.699975617 | -0.780297482 | 0.435215794 | 0.526732846 |
| 1700020D05Rik | 5.281332511 | -0.546741199 | 0.852185595 | -0.641575265 | 0.521148997 | 0.609658142 |
| Tex38         | 2.894594946 | -0.547076876 | 1.125437744 | -0.486101411 | 0.626895266 | 0.705712526 |
| Fubp3         | 536.6371075 | -0.547170295 | 0.246533018 | -2.2194605   | 0.026455412 | 0.048149019 |
| Tfrc          | 731.5003549 | -0.547240025 | 0.30730592  | -1.7807663   | 0.074950637 | 0.120100133 |
| Nacc1         | 821.9174146 | -0.547336252 | 0.205142699 | -2.66807571  | 0.007628707 | 0.015934108 |
| Akap13        | 1445.239747 | -0.547622084 | 0.176134379 | -3.109115258 | 0.001876485 | 0.00446169  |
| Spa17         | 21.22073933 | -0.547706032 | 0.422880956 | -1.295177813 | 0.195258897 | 0.271803191 |
| Gm29394       | 11.69559692 | -0.547728474 | 1.053341869 | -0.519991174 | 0.603069727 | 0.684769729 |
| Pisd          | 759.059773  | -0.548958786 | 0.210927133 | -2.60259919  | 0.009252005 | 0.018934955 |
| Siah1b        | 30.07812609 | -0.549024618 | 0.469285773 | -1.169915326 | 0.242035046 | 0.325719408 |
| Eif1a         | 1203.93504  | -0.549163516 | 0.176597838 | -3.109684246 | 0.001872874 | 0.004454969 |
| Gstcd         | 106.656197  | -0.549166919 | 0.237903367 | -2.308361267 | 0.020979051 | 0.039216104 |
| Ext2          | 674.5323433 | -0.549253917 | 0.195800559 | -2.805170328 | 0.005029    | 0.010931326 |
| Gm19196       | 6.042452561 | -0.549316148 | 0.977426343 | -0.562002602 | 0.574114246 | 0.657850495 |
| Pip1          | 54.01041442 | -0.550385048 | 0.363784445 | -1.512942774 | 0.130294195 | 0.193354408 |
| Comtd1        | 174.0052128 | -0.550690842 | 0.286275042 | -1.923642512 | 0.054399408 | 0.090699376 |
| Il17ra        | 423.0619146 | -0.550746996 | 0.219015294 | -2.514650848 | 0.011915032 | 0.023738593 |
| Pitpna        | 1151.969951 | -0.550782084 | 0.12823564  | -4.295078068 | 1.75E-05    | 5.94E-05    |
| Ing5          | 243.4101065 | -0.550824231 | 0.178428237 | -3.087091142 | 0.002021256 | 0.00477395  |
| Zfp105        | 16.52169743 | -0.550832588 | 0.551654498 | -0.998510099 | 0.31803207  | 0.409502321 |
| Rplp2         | 4016.182815 | -0.550849227 | 0.145103883 | -3.796240431 | 0.000146907 | 0.000432327 |
| Slc41a2       | 858.975421  | -0.550908331 | 0.317878212 | -1.733079873 | 0.083081473 | 0.131584258 |
| Gm15538       | 1.132212224 | -0.551149777 | 1.731384124 | -0.318329    | 0.750235389 | NA          |
| Ppp2cb        | 609.0368222 | -0.551361376 | 0.195335205 | -2.82264211  | 0.004762971 | 0.010396815 |
| D11Wsu47e     | 121.3256826 | -0.551436862 | 0.201222035 | -2.74043975  | 0.006135703 | 0.013073549 |
| Camkk2        | 326.8309824 | -0.551534204 | 0.223102253 | -2.472113999 | 0.013431668 | 0.026365937 |
| Maged1        | 2630.114058 | -0.55156271  | 0.191586624 | -2.878920763 | 0.003990386 | 0.008861287 |
| Zfp607a       | 38.13354291 | -0.551583073 | 0.374737335 | -1.471919184 | 0.141042702 | 0.206500858 |
| Zfp819        | 0.748676093 | -0.55172859  | 2.467382706 | -0.223608842 | 0.823061683 | NA          |
| Birc3         | 325.2755624 | -0.551972196 | 0.178092699 | -3.099353301 | 0.001939436 | 0.004595345 |
| Ocir1         | 222.9639168 | -0.552121218 | 0.258465305 | -2.136152159 | 0.032667013 | 0.058041401 |
| Tbc1d24       | 606.8022705 | -0.552520469 | 0.18408721  | -3.001406072 | 0.002687359 | 0.006184409 |
| Spty2d1       | 318.8875744 | -0.552997528 | 0.193286602 | -2.861023591 | 0.004222756 | 0.009338377 |
| Elf1          | 442.7683468 | -0.553225256 | 0.144379888 | -3.831733503 | 0.000127244 | 0.00037772  |
| Gm16479       | 1.087136731 | -0.553251312 | 2.185011734 | -0.253202902 | 0.800111424 | NA          |
| Pik3cb        | 318.1029293 | -0.553289026 | 0.195584183 | -2.828904757 | 0.00467076  | 0.010221709 |
| Lrrc61        | 98.43197554 | -0.553377115 | 0.24945864  | -2.218312082 | 0.026533561 | 0.048280942 |
| Caskin1       | 7.501165709 | -0.553661591 | 0.911667426 | -0.607306541 | 0.543647499 | 0.630097393 |
| Rnaseh2b      | 133.317122  | -0.553761174 | 0.285907652 | -1.936853285 | 0.05276328  | 0.088389812 |
| Krba1         | 574.4415773 | -0.554010685 | 0.240966679 | -2.299117405 | 0.021498273 | 0.040085576 |



|               |             |              |             |              |             |             |
|---------------|-------------|--------------|-------------|--------------|-------------|-------------|
| Ttll3         | 40.82211621 | -0.554187223 | 0.44597406  | -1.242644523 | 0.213998855 | 0.293574675 |
| Cdk7          | 297.4626665 | -0.55461505  | 0.225934379 | -2.454761656 | 0.014097803 | 0.027536588 |
| Pknox2        | 24.87144507 | -0.55481976  | 0.441035458 | -1.257993546 | 0.20839409  | 0.286994301 |
| Ddb2          | 184.3981886 | -0.554832235 | 0.211105063 | -2.628227994 | 0.008583097 | 0.017712702 |
| Ptpn11        | 1208.670223 | -0.554881732 | 0.200270948 | -2.770655145 | 0.005594364 | 0.012046573 |
| Ssx2ip        | 139.0892386 | -0.555015386 | 0.223526317 | -2.482997949 | 0.013028184 | 0.02565341  |
| Irgq          | 384.3528805 | -0.55510914  | 0.182117358 | -3.048084737 | 0.00230305  | 0.005379147 |
| Astn2         | 19.10913634 | -0.55565667  | 0.448783875 | -1.238138668 | 0.215664648 | 0.295574477 |
| Olfir204      | 9.172813468 | -0.555684384 | 0.667698311 | -0.832238715 | 0.405274215 | 0.49790698  |
| Ttl           | 113.1118881 | -0.555890781 | 0.211421704 | -2.629298551 | 0.008556121 | 0.017669866 |
| Gm14599       | 0.250464475 | -0.556100792 | 3.636990133 | -0.152901375 | 0.878476052 | NA          |
| Ccdc82        | 368.6196613 | -0.556134142 | 0.142616827 | -3.899498769 | 9.64E-05    | 0.000292401 |
| Fabp5         | 1013.55496  | -0.556206411 | 0.346077817 | -1.607171517 | 0.108016748 | 0.164858507 |
| Trim28        | 1742.478662 | -0.55636862  | 0.150232507 | -3.703383707 | 0.000212743 | 0.000608326 |
| Alyref        | 283.7131754 | -0.557306161 | 0.1978783   | -2.816408677 | 0.004856385 | 0.010585813 |
| Rps27a        | 5800.780541 | -0.557330535 | 0.147535853 | -3.777593869 | 0.000158351 | 0.000462888 |
| Nol10         | 153.4222006 | -0.557440239 | 0.228760514 | -2.436785215 | 0.014818478 | 0.028783428 |
| Aicda         | 1.705408523 | -0.557749011 | 1.496920063 | -0.372597726 | 0.709447866 | 0.775398591 |
| Gm5177        | 3.914607883 | -0.55792535  | 1.059907736 | -0.526390488 | 0.598616924 | 0.680938234 |
| Zfp865        | 507.3383797 | -0.558278775 | 0.390646204 | -1.429116088 | 0.15297087  | 0.221454433 |
| Vmn1r38       | 2.355516228 | -0.558283962 | 1.254473392 | -0.445034519 | 0.656294809 | 0.731181949 |
| Sppl3         | 597.6953685 | -0.55832887  | 0.206150002 | -2.70836219  | 0.006761619 | 0.014273412 |
| Gm13653       | 0.61550512  | -0.558331219 | 2.194727114 | -0.254396647 | 0.799189141 | NA          |
| Prkag3        | 3.038515621 | -0.558781142 | 1.097164819 | -0.509295533 | 0.610545088 | 0.691415748 |
| Mta1          | 848.8330173 | -0.558821957 | 0.165419382 | -3.378213309 | 0.000729585 | 0.001887685 |
| Pom121        | 366.8593738 | -0.559197701 | 0.198266383 | -2.820436291 | 0.00479584  | 0.01045785  |
| Uevld         | 296.9837377 | -0.559461087 | 0.17915923  | -3.12270312  | 0.001791984 | 0.004278676 |
| Lrrc39        | 17.33449333 | -0.559916496 | 0.569691021 | -0.98284241  | 0.325685005 | 0.417150862 |
| Abcc9         | 360.5048703 | -0.560186348 | 0.302562094 | -1.851475645 | 0.064101155 | 0.104704081 |
| Naif1         | 88.52098439 | -0.560346965 | 0.254330132 | -2.20322681  | 0.027578767 | 0.049964167 |
| Gm32842       | 0.60512843  | -0.560532925 | 2.879426442 | -0.194668256 | 0.845652664 | NA          |
| Ptch1         | 499.2058729 | -0.560739313 | 0.236757511 | -2.368411933 | 0.017864633 | 0.034005835 |
| Frmf8         | 421.6266761 | -0.56080273  | 0.187014104 | -2.998718911 | 0.002711173 | 0.006234162 |
| Fhl1          | 146.4360827 | -0.560880216 | 0.448342198 | -1.251009205 | 0.210931119 | 0.290066445 |
| Pear1         | 213.6240515 | -0.561131912 | 0.306377322 | -1.831506027 | 0.067025049 | 0.108916503 |
| Hnrnpa0       | 1581.12914  | -0.56131159  | 0.147166627 | -3.814122815 | 0.000136667 | 0.000403867 |
| Anp32e        | 408.7883022 | -0.561505362 | 0.190592244 | -2.946108144 | 0.003217999 | 0.007299154 |
| Gm4780        | 1.075064497 | -0.561684885 | 1.952685986 | -0.287647317 | 0.773616721 | NA          |
| 7530428D23Rik | 0.259777751 | -0.561948705 | 3.636401327 | -0.154534292 | 0.877188475 | NA          |
| Khsrp         | 1180.49578  | -0.562208393 | 0.185433753 | -3.031855757 | 0.002430553 | 0.005649089 |
| Slc50a1       | 268.5161373 | -0.562333134 | 0.160111718 | -3.512129791 | 0.000445531 | 0.001197781 |
| Malt1         | 318.4505685 | -0.562640128 | 0.225781516 | -2.491967178 | 0.012703778 | 0.025112561 |
| Zfp422        | 534.4329868 | -0.562734042 | 0.201275359 | -2.795841699 | 0.005176475 | 0.011216134 |
| Abca15        | 0.259496287 | -0.562833654 | 3.63646135  | -0.154775096 | 0.876998625 | NA          |
| Dsc1          | 0.228527276 | -0.563077501 | 3.635269429 | -0.154892921 | 0.876905734 | NA          |
| H2ac11        | 0.258886867 | -0.563111357 | 3.636750558 | -0.154839148 | 0.876948128 | NA          |
| Wdr90         | 186.4135054 | -0.563928432 | 0.202917502 | -2.779101978 | 0.005450941 | 0.011760015 |
| Gm43493       | 0.254005368 | -0.5642351   | 3.63721957  | -0.155128138 | 0.8767203   | NA          |
| St5           | 1135.64588  | -0.564291501 | 0.184100082 | -3.065134437 | 0.002175722 | 0.005112571 |
| Zbtb18        | 599.0935583 | -0.564557046 | 0.390018322 | -1.447514166 | 0.147752972 | 0.215136795 |
| Oacyl         | 6.178424163 | -0.564745426 | 0.739418034 | -0.763770154 | 0.445004226 | 0.53610572  |
| Arhgef38      | 0.598209817 | -0.564854446 | 2.483947965 | -0.227401884 | 0.820111256 | NA          |
| Nup210        | 377.9523493 | -0.565121432 | 0.301318386 | -1.87549601  | 0.060724518 | 0.099900785 |
| Sap30         | 100.181158  | -0.565232123 | 0.244458148 | -2.312183614 | 0.020767567 | 0.038859124 |
| Gli1          | 6.406101028 | -0.565249031 | 0.905799523 | -0.624033261 | 0.532605742 | 0.620293939 |
| Scamp2        | 545.3691229 | -0.565355885 | 0.133534784 | -4.233772425 | 2.30E-05    | 7.68E-05    |
| Il13ra1       | 718.3029874 | -0.565696822 | 0.140100268 | -4.037799706 | 5.40E-05    | 0.000169991 |
| Tmem179       | 2.1916549   | -0.565785813 | 1.439789094 | -0.392964369 | 0.694345798 | 0.763493754 |
| Gse1          | 595.0967142 | -0.565794923 | 0.227138923 | -2.490964194 | 0.012739696 | 0.025172269 |
| Ccdc65        | 2.070511609 | -0.565861809 | 1.541922618 | -0.36698457  | 0.713630528 | 0.778706182 |
| Hsdl1         | 192.6396535 | -0.566635057 | 0.236603782 | -2.394868978 | 0.016626305 | 0.031887192 |
| Dync1li2      | 713.2164311 | -0.56672587  | 0.140468415 | -4.034543059 | 5.47E-05    | 0.000172143 |
| Pepd          | 1078.342259 | -0.566768615 | 0.193685975 | -2.926224342 | 0.003431034 | 0.007730937 |
| Ank1          | 8.426248517 | -0.566929652 | 0.831588635 | -0.681742905 | 0.495401532 | 0.585281034 |
| Gm12248       | 0.736495351 | -0.568191722 | 2.392072904 | -0.237531106 | 0.812244791 | NA          |
| Hivep2        | 287.1360489 | -0.568287305 | 0.246855165 | -2.302108225 | 0.02132907  | 0.039800567 |

|               |             |              |             |              |             |    |             |
|---------------|-------------|--------------|-------------|--------------|-------------|----|-------------|
| Lrrc23        | 0.234880848 | -0.568336022 | 3.635525028 | -0.156328458 | 0.875774126 | NA |             |
| Trbj2-1       | 0.257760916 | -0.568652147 | 3.636852006 | -0.156358341 | 0.875750572 | NA |             |
| Cask          | 480.4374417 | -0.568687928 | 0.196107044 | -2.899885275 | 0.003732993 |    | 0.008346237 |
| Zfp553        | 177.1828717 | -0.568770676 | 0.20079382  | -2.832610463 | 0.004616961 |    | 0.010120863 |
| Pomk          | 164.8374373 | -0.568814507 | 0.234921677 | -2.421294253 | 0.015465353 |    | 0.029940193 |
| Dync1i1       | 0.480539549 | -0.56900497  | 3.084855898 | -0.18445107  | 0.853659609 | NA |             |
| Ddx60         | 117.4803339 | -0.569394367 | 0.403449368 | -1.411315553 | 0.15815159  |    | 0.227659234 |
| Gm20503       | 0.226120386 | -0.569461269 | 3.636940382 | -0.156577015 | 0.875578218 | NA |             |
| Gm45269       | 0.236080452 | -0.569954622 | 3.636938548 | -0.156712745 | 0.875471242 | NA |             |
| Gm11474       | 0.236083479 | -0.569954622 | 3.636938548 | -0.156712745 | 0.875471242 | NA |             |
| Gm7413        | 0.236102633 | -0.569954622 | 3.636938548 | -0.156712745 | 0.875471242 | NA |             |
| Gm9104        | 0.236108071 | -0.569954622 | 3.636938548 | -0.156712745 | 0.875471242 | NA |             |
| 1700049L16Rik | 0.236122571 | -0.569954622 | 3.636938548 | -0.156712745 | 0.875471242 | NA |             |
| Gm48068       | 0.23612773  | -0.569954622 | 3.636938548 | -0.156712745 | 0.875471242 | NA |             |
| Gm6474        | 0.23615171  | -0.569954622 | 3.636938548 | -0.156712745 | 0.875471242 | NA |             |
| Gm18561       | 0.236165309 | -0.569954622 | 3.636938548 | -0.156712745 | 0.875471242 | NA |             |
| Hnrnpa1l2-ps2 | 0.236179941 | -0.569954622 | 3.636938548 | -0.156712745 | 0.875471242 | NA |             |
| Gm9135        | 0.23618193  | -0.569954622 | 3.636938548 | -0.156712745 | 0.875471242 | NA |             |
| Gm8565        | 0.236183603 | -0.569954622 | 3.636938548 | -0.156712745 | 0.875471242 | NA |             |
| Obox4-ps14    | 0.236190467 | -0.569954622 | 3.636938548 | -0.156712745 | 0.875471242 | NA |             |
| Gprc5d        | 0.236199198 | -0.569954622 | 3.636938548 | -0.156712745 | 0.875471242 | NA |             |
| Acot10        | 0.236206498 | -0.569954622 | 3.636938548 | -0.156712745 | 0.875471242 | NA |             |
| Vsnl1         | 0.236210612 | -0.569954622 | 3.636938548 | -0.156712745 | 0.875471242 | NA |             |
| Gm4740        | 0.236212251 | -0.569954622 | 3.636938548 | -0.156712745 | 0.875471242 | NA |             |
| Gm6645        | 0.236224991 | -0.569954622 | 3.636938548 | -0.156712745 | 0.875471242 | NA |             |
| Gm13797       | 0.23705334  | -0.569954622 | 3.636938548 | -0.156712745 | 0.875471242 | NA |             |
| Gm6612        | 0.24239487  | -0.569954627 | 3.636938548 | -0.156712746 | 0.875471241 | NA |             |
| Gm12101       | 0.24239717  | -0.569954627 | 3.636938548 | -0.156712746 | 0.875471241 | NA |             |
| Gm7774        | 0.242397505 | -0.569954627 | 3.636938548 | -0.156712746 | 0.875471241 | NA |             |
| Gm7318        | 0.242401889 | -0.569954627 | 3.636938548 | -0.156712746 | 0.875471241 | NA |             |
| Gm4742        | 0.242410066 | -0.569954627 | 3.636938548 | -0.156712746 | 0.875471241 | NA |             |
| Gm2199        | 0.242413541 | -0.569954627 | 3.636938548 | -0.156712746 | 0.875471241 | NA |             |
| Gm5529        | 0.242414021 | -0.569954627 | 3.636938548 | -0.156712746 | 0.875471241 | NA |             |
| Tmem89        | 0.242415409 | -0.569954627 | 3.636938548 | -0.156712746 | 0.875471241 | NA |             |
| Gm18499       | 0.24241707  | -0.569954627 | 3.636938548 | -0.156712746 | 0.875471241 | NA |             |
| Gm9023        | 0.242417402 | -0.569954627 | 3.636938548 | -0.156712746 | 0.875471241 | NA |             |
| Gm9256        | 0.242422523 | -0.569954627 | 3.636938548 | -0.156712746 | 0.875471241 | NA |             |
| Slc35f3       | 0.242427402 | -0.569954627 | 3.636938548 | -0.156712746 | 0.875471241 | NA |             |
| Gm12394       | 0.242429662 | -0.569954627 | 3.636938548 | -0.156712746 | 0.875471241 | NA |             |
| Adra2c        | 0.2424298   | -0.569954627 | 3.636938548 | -0.156712746 | 0.875471241 | NA |             |
| Olfr358       | 0.242431236 | -0.569954627 | 3.636938548 | -0.156712746 | 0.875471241 | NA |             |
| Gm30646       | 0.242513889 | -0.569954627 | 3.636938548 | -0.156712746 | 0.875471241 | NA |             |
| Gm48398       | 0.249483828 | -0.569954632 | 3.636938548 | -0.156712747 | 0.87547124  | NA |             |
| Gm44576       | 0.249532553 | -0.569954632 | 3.636938548 | -0.156712747 | 0.87547124  | NA |             |
| Gm3841        | 0.24954444  | -0.569954632 | 3.636938548 | -0.156712747 | 0.87547124  | NA |             |
| Gm29610       | 0.249545103 | -0.569954632 | 3.636938548 | -0.156712747 | 0.87547124  | NA |             |
| Gm13213       | 0.249549369 | -0.569954632 | 3.636938548 | -0.156712747 | 0.87547124  | NA |             |
| Gm18188       | 0.249551654 | -0.569954632 | 3.636938548 | -0.156712747 | 0.87547124  | NA |             |
| Gm8371        | 0.249563357 | -0.569954632 | 3.636938548 | -0.156712747 | 0.87547124  | NA |             |
| Rnase12       | 0.249564214 | -0.569954632 | 3.636938548 | -0.156712747 | 0.87547124  | NA |             |
| Gm9970        | 0.249564549 | -0.569954632 | 3.636938548 | -0.156712747 | 0.87547124  | NA |             |
| Gm8850        | 0.249571147 | -0.569954632 | 3.636938548 | -0.156712747 | 0.87547124  | NA |             |
| Gm21178       | 0.249587903 | -0.569954632 | 3.636938548 | -0.156712747 | 0.87547124  | NA |             |
| 5730416F02Rik | 0.249595025 | -0.569954632 | 3.636938548 | -0.156712747 | 0.87547124  | NA |             |
| Prl6a1        | 0.249598842 | -0.569954632 | 3.636938548 | -0.156712747 | 0.87547124  | NA |             |
| Gm8318        | 0.249599092 | -0.569954632 | 3.636938548 | -0.156712747 | 0.87547124  | NA |             |
| 4933417G07Rik | 0.24960416  | -0.569954632 | 3.636938548 | -0.156712747 | 0.87547124  | NA |             |
| Sulf2a4       | 0.24960416  | -0.569954632 | 3.636938548 | -0.156712747 | 0.87547124  | NA |             |
| Gm5067        | 0.249606241 | -0.569954632 | 3.636938548 | -0.156712747 | 0.87547124  | NA |             |
| Gm14032       | 0.249606972 | -0.569954632 | 3.636938548 | -0.156712747 | 0.87547124  | NA |             |
| Gm4887        | 0.249608076 | -0.569954632 | 3.636938548 | -0.156712747 | 0.87547124  | NA |             |
| Aqp12         | 0.249609411 | -0.569954632 | 3.636938548 | -0.156712747 | 0.87547124  | NA |             |
| Gm15712       | 0.24961174  | -0.569954632 | 3.636938548 | -0.156712747 | 0.87547124  | NA |             |
| Gm20587       | 0.249612703 | -0.569954632 | 3.636938548 | -0.156712747 | 0.87547124  | NA |             |
| Eef1a1-ps2    | 0.249616663 | -0.569954632 | 3.636938548 | -0.156712747 | 0.87547124  | NA |             |
| Drd3          | 0.249619118 | -0.569954632 | 3.636938548 | -0.156712747 | 0.87547124  | NA |             |

|               |             |              |             |              |             |    |
|---------------|-------------|--------------|-------------|--------------|-------------|----|
| Gm16465       | 0.249623767 | -0.569954632 | 3.636938548 | -0.156712747 | 0.87547124  | NA |
| Gm3194        | 0.249624429 | -0.569954632 | 3.636938548 | -0.156712747 | 0.87547124  | NA |
| Zp3r          | 0.249624682 | -0.569954632 | 3.636938548 | -0.156712747 | 0.87547124  | NA |
| Gm13078       | 0.249627327 | -0.569954632 | 3.636938548 | -0.156712747 | 0.87547124  | NA |
| Olfr612       | 0.249629601 | -0.569954632 | 3.636938548 | -0.156712747 | 0.87547124  | NA |
| Gm14857       | 0.249633168 | -0.569954632 | 3.636938548 | -0.156712747 | 0.87547124  | NA |
| Tmc2          | 0.249633275 | -0.569954632 | 3.636938548 | -0.156712747 | 0.87547124  | NA |
| Olfr974       | 0.249634335 | -0.569954632 | 3.636938548 | -0.156712747 | 0.87547124  | NA |
| Gm19368       | 0.249636235 | -0.569954632 | 3.636938548 | -0.156712747 | 0.87547124  | NA |
| Gm16478       | 0.24963724  | -0.569954632 | 3.636938548 | -0.156712747 | 0.87547124  | NA |
| Olfr1324      | 0.24963794  | -0.569954632 | 3.636938548 | -0.156712747 | 0.87547124  | NA |
| Ky            | 0.249638101 | -0.569954632 | 3.636938548 | -0.156712747 | 0.87547124  | NA |
| Gm867         | 0.25533503  | -0.569954633 | 3.636938548 | -0.156712748 | 0.87547124  | NA |
| Gm13685       | 0.252352997 | -0.569954635 | 3.636938548 | -0.156712748 | 0.87547124  | NA |
| Dthd1         | 0.252442076 | -0.569954635 | 3.636938548 | -0.156712748 | 0.87547124  | NA |
| Klrl1         | 0.252445597 | -0.569954635 | 3.636938548 | -0.156712748 | 0.87547124  | NA |
| Gm7529        | 0.252446718 | -0.569954635 | 3.636938548 | -0.156712748 | 0.87547124  | NA |
| Gm7199        | 0.252453064 | -0.569954635 | 3.636938548 | -0.156712748 | 0.87547124  | NA |
| Gm13410       | 0.252454585 | -0.569954635 | 3.636938548 | -0.156712748 | 0.87547124  | NA |
| Gm9333        | 0.252456882 | -0.569954635 | 3.636938548 | -0.156712748 | 0.87547124  | NA |
| Gm8896        | 0.252464204 | -0.569954635 | 3.636938548 | -0.156712748 | 0.87547124  | NA |
| Gm4929        | 0.252469742 | -0.569954635 | 3.636938548 | -0.156712748 | 0.87547124  | NA |
| Grid2ip       | 0.252492797 | -0.569954635 | 3.636938548 | -0.156712748 | 0.87547124  | NA |
| Gm48557       | 0.252526184 | -0.569954635 | 3.636938548 | -0.156712748 | 0.87547124  | NA |
| Gml           | 0.25253218  | -0.569954635 | 3.636938548 | -0.156712748 | 0.87547124  | NA |
| Gm2350        | 0.252553719 | -0.569954635 | 3.636938548 | -0.156712748 | 0.87547124  | NA |
| Gm19810       | 0.252622027 | -0.569954635 | 3.636938548 | -0.156712748 | 0.87547124  | NA |
| Gm48577       | 0.259310742 | -0.56995464  | 3.636938548 | -0.15671275  | 0.875471238 | NA |
| Lrrc31        | 0.259657113 | -0.56995464  | 3.636938548 | -0.15671275  | 0.875471238 | NA |
| Gm5404        | 0.259675099 | -0.56995464  | 3.636938548 | -0.15671275  | 0.875471238 | NA |
| Gm12696       | 0.259724495 | -0.56995464  | 3.636938548 | -0.15671275  | 0.875471238 | NA |
| Gm8231        | 0.259742628 | -0.56995464  | 3.636938548 | -0.15671275  | 0.875471238 | NA |
| Gm48134       | 0.259754361 | -0.56995464  | 3.636938548 | -0.15671275  | 0.875471238 | NA |
| Gm19239       | 0.259824225 | -0.56995464  | 3.636938548 | -0.15671275  | 0.875471238 | NA |
| Gm43247       | 0.259845306 | -0.56995464  | 3.636938548 | -0.15671275  | 0.875471238 | NA |
| Trav14-2      | 0.259892385 | -0.56995464  | 3.636938548 | -0.15671275  | 0.875471238 | NA |
| Gm45499       | 0.259901651 | -0.56995464  | 3.636938548 | -0.15671275  | 0.875471238 | NA |
| S100a11-ps    | 0.259937056 | -0.56995464  | 3.636938548 | -0.15671275  | 0.875471238 | NA |
| Gm11450       | 0.259951318 | -0.56995464  | 3.636938548 | -0.15671275  | 0.875471238 | NA |
| Gm44184       | 0.265772552 | -0.569954645 | 3.636938548 | -0.156712751 | 0.875471237 | NA |
| Gm14143       | 0.265796518 | -0.569954645 | 3.636938548 | -0.156712751 | 0.875471237 | NA |
| Gm14633       | 0.265811312 | -0.569954645 | 3.636938548 | -0.156712751 | 0.875471237 | NA |
| Gm10362       | 0.265815274 | -0.569954645 | 3.636938548 | -0.156712751 | 0.875471237 | NA |
| Gm11539       | 0.265815378 | -0.569954645 | 3.636938548 | -0.156712751 | 0.875471237 | NA |
| Tpi-rs4       | 0.265818059 | -0.569954645 | 3.636938548 | -0.156712751 | 0.875471237 | NA |
| Gm18969       | 0.265818157 | -0.569954645 | 3.636938548 | -0.156712751 | 0.875471237 | NA |
| Rps2-ps9      | 0.265818883 | -0.569954645 | 3.636938548 | -0.156712751 | 0.875471237 | NA |
| Gm7784        | 0.265819876 | -0.569954645 | 3.636938548 | -0.156712751 | 0.875471237 | NA |
| Gm5300        | 0.265819939 | -0.569954645 | 3.636938548 | -0.156712751 | 0.875471237 | NA |
| Pin1rt1       | 0.265820572 | -0.569954645 | 3.636938548 | -0.156712751 | 0.875471237 | NA |
| Gm4797        | 0.26582088  | -0.569954645 | 3.636938548 | -0.156712751 | 0.875471237 | NA |
| Gm8188        | 0.26582163  | -0.569954645 | 3.636938548 | -0.156712751 | 0.875471237 | NA |
| Syndig1       | 0.265822026 | -0.569954645 | 3.636938548 | -0.156712751 | 0.875471237 | NA |
| Gpr20         | 0.265822106 | -0.569954645 | 3.636938548 | -0.156712751 | 0.875471237 | NA |
| Cwh43         | 0.265822234 | -0.569954645 | 3.636938548 | -0.156712751 | 0.875471237 | NA |
| Olfr1154      | 0.265822418 | -0.569954645 | 3.636938548 | -0.156712751 | 0.875471237 | NA |
| Olfr1391      | 0.265822675 | -0.569954645 | 3.636938548 | -0.156712751 | 0.875471237 | NA |
| Theg          | 0.2669852   | -0.569954645 | 3.636938548 | -0.156712751 | 0.875471237 | NA |
| Trgj1         | 0.269687539 | -0.569954646 | 3.636938548 | -0.156712751 | 0.875471237 | NA |
| 4930444G20Rik | 0.226254372 | -0.569954775 | 3.636938547 | -0.156712787 | 0.875471209 | NA |
| Aox4          | 0.226254372 | -0.569954775 | 3.636938547 | -0.156712787 | 0.875471209 | NA |
| Btnl5-ps      | 0.226254372 | -0.569954775 | 3.636938547 | -0.156712787 | 0.875471209 | NA |
| Btnl6         | 0.226254372 | -0.569954775 | 3.636938547 | -0.156712787 | 0.875471209 | NA |
| Chst5         | 0.226254372 | -0.569954775 | 3.636938547 | -0.156712787 | 0.875471209 | NA |
| Defa36        | 0.226254372 | -0.569954775 | 3.636938547 | -0.156712787 | 0.875471209 | NA |
| Epha8         | 0.226254372 | -0.569954775 | 3.636938547 | -0.156712787 | 0.875471209 | NA |

|               |             |              |             |              |             |    |
|---------------|-------------|--------------|-------------|--------------|-------------|----|
| Fam71f1       | 0.226254372 | -0.569954775 | 3.636938547 | -0.156712787 | 0.875471209 | NA |
| Gm10075       | 0.226254372 | -0.569954775 | 3.636938547 | -0.156712787 | 0.875471209 | NA |
| Gm10097       | 0.226254372 | -0.569954775 | 3.636938547 | -0.156712787 | 0.875471209 | NA |
| Gm12024       | 0.226254372 | -0.569954775 | 3.636938547 | -0.156712787 | 0.875471209 | NA |
| Gm12905       | 0.226254372 | -0.569954775 | 3.636938547 | -0.156712787 | 0.875471209 | NA |
| Gm13217       | 0.226254372 | -0.569954775 | 3.636938547 | -0.156712787 | 0.875471209 | NA |
| Gm13472       | 0.226254372 | -0.569954775 | 3.636938547 | -0.156712787 | 0.875471209 | NA |
| Gm14000       | 0.226254372 | -0.569954775 | 3.636938547 | -0.156712787 | 0.875471209 | NA |
| Gm14270       | 0.226254372 | -0.569954775 | 3.636938547 | -0.156712787 | 0.875471209 | NA |
| Gm14398       | 0.226254372 | -0.569954775 | 3.636938547 | -0.156712787 | 0.875471209 | NA |
| Gm15528       | 0.226254372 | -0.569954775 | 3.636938547 | -0.156712787 | 0.875471209 | NA |
| Gm15779       | 0.226254372 | -0.569954775 | 3.636938547 | -0.156712787 | 0.875471209 | NA |
| Gm29736       | 0.226254372 | -0.569954775 | 3.636938547 | -0.156712787 | 0.875471209 | NA |
| Gm43442       | 0.226254372 | -0.569954775 | 3.636938547 | -0.156712787 | 0.875471209 | NA |
| Gm45692       | 0.226254372 | -0.569954775 | 3.636938547 | -0.156712787 | 0.875471209 | NA |
| Gm4869        | 0.226254372 | -0.569954775 | 3.636938547 | -0.156712787 | 0.875471209 | NA |
| Gm5862        | 0.226254372 | -0.569954775 | 3.636938547 | -0.156712787 | 0.875471209 | NA |
| Gm6184        | 0.226254372 | -0.569954775 | 3.636938547 | -0.156712787 | 0.875471209 | NA |
| Gm6803        | 0.226254372 | -0.569954775 | 3.636938547 | -0.156712787 | 0.875471209 | NA |
| Gm7206        | 0.226254372 | -0.569954775 | 3.636938547 | -0.156712787 | 0.875471209 | NA |
| Gm8049        | 0.226254372 | -0.569954775 | 3.636938547 | -0.156712787 | 0.875471209 | NA |
| Gm8121        | 0.226254372 | -0.569954775 | 3.636938547 | -0.156712787 | 0.875471209 | NA |
| Gm8181        | 0.226254372 | -0.569954775 | 3.636938547 | -0.156712787 | 0.875471209 | NA |
| Gm8424        | 0.226254372 | -0.569954775 | 3.636938547 | -0.156712787 | 0.875471209 | NA |
| Gm8539        | 0.226254372 | -0.569954775 | 3.636938547 | -0.156712787 | 0.875471209 | NA |
| Gm9770        | 0.226254372 | -0.569954775 | 3.636938547 | -0.156712787 | 0.875471209 | NA |
| Heph1         | 0.226254372 | -0.569954775 | 3.636938547 | -0.156712787 | 0.875471209 | NA |
| Hmgb1-ps6     | 0.226254372 | -0.569954775 | 3.636938547 | -0.156712787 | 0.875471209 | NA |
| Ifna6         | 0.226254372 | -0.569954775 | 3.636938547 | -0.156712787 | 0.875471209 | NA |
| Nudc-ps1      | 0.226254372 | -0.569954775 | 3.636938547 | -0.156712787 | 0.875471209 | NA |
| Pcdha9        | 0.226254372 | -0.569954775 | 3.636938547 | -0.156712787 | 0.875471209 | NA |
| Pifo          | 0.226254372 | -0.569954775 | 3.636938547 | -0.156712787 | 0.875471209 | NA |
| Reg3a         | 0.226254372 | -0.569954775 | 3.636938547 | -0.156712787 | 0.875471209 | NA |
|               | 14-Sep      |              |             |              |             |    |
| Tex15         | 0.226254372 | -0.569954775 | 3.636938547 | -0.156712787 | 0.875471209 | NA |
| Tuba13        | 0.226254372 | -0.569954775 | 3.636938547 | -0.156712787 | 0.875471209 | NA |
| Vmn2r5        | 0.226254372 | -0.569954775 | 3.636938547 | -0.156712787 | 0.875471209 | NA |
| Gm14915       | 0.244447302 | -0.569954776 | 3.636938547 | -0.156712787 | 0.875471209 | NA |
| LT629150.3    | 0.24581116  | -0.569954776 | 3.636938547 | -0.156712787 | 0.875471209 | NA |
| 1700015F17Rik | 0.246240952 | -0.569954776 | 3.636938547 | -0.156712787 | 0.875471209 | NA |
| 4930442H23Rik | 0.246240952 | -0.569954776 | 3.636938547 | -0.156712787 | 0.875471209 | NA |
| Ankdd1b       | 0.246240952 | -0.569954776 | 3.636938547 | -0.156712787 | 0.875471209 | NA |
| Cfap299       | 0.246240952 | -0.569954776 | 3.636938547 | -0.156712787 | 0.875471209 | NA |
| Cyp26c1       | 0.246240952 | -0.569954776 | 3.636938547 | -0.156712787 | 0.875471209 | NA |
| F830045P16Rik | 0.246240952 | -0.569954776 | 3.636938547 | -0.156712787 | 0.875471209 | NA |
| Gm11034       | 0.246240952 | -0.569954776 | 3.636938547 | -0.156712787 | 0.875471209 | NA |
| Gm11637       | 0.246240952 | -0.569954776 | 3.636938547 | -0.156712787 | 0.875471209 | NA |
| Gm12098       | 0.246240952 | -0.569954776 | 3.636938547 | -0.156712787 | 0.875471209 | NA |
| Gm13418       | 0.246240952 | -0.569954776 | 3.636938547 | -0.156712787 | 0.875471209 | NA |
| Gm13720       | 0.246240952 | -0.569954776 | 3.636938547 | -0.156712787 | 0.875471209 | NA |
| Gm14586       | 0.246240952 | -0.569954776 | 3.636938547 | -0.156712787 | 0.875471209 | NA |
| Gm17053       | 0.246240952 | -0.569954776 | 3.636938547 | -0.156712787 | 0.875471209 | NA |
| Gm18413       | 0.246240952 | -0.569954776 | 3.636938547 | -0.156712787 | 0.875471209 | NA |
| Gm28453       | 0.246240952 | -0.569954776 | 3.636938547 | -0.156712787 | 0.875471209 | NA |
| Gm29649       | 0.246240952 | -0.569954776 | 3.636938547 | -0.156712787 | 0.875471209 | NA |
| Gm29739       | 0.246240952 | -0.569954776 | 3.636938547 | -0.156712787 | 0.875471209 | NA |
| Gm3724        | 0.246240952 | -0.569954776 | 3.636938547 | -0.156712787 | 0.875471209 | NA |
| Gm43380       | 0.246240952 | -0.569954776 | 3.636938547 | -0.156712787 | 0.875471209 | NA |
| Gm45403       | 0.246240952 | -0.569954776 | 3.636938547 | -0.156712787 | 0.875471209 | NA |
| Gm49506       | 0.246240952 | -0.569954776 | 3.636938547 | -0.156712787 | 0.875471209 | NA |
| Gm5522        | 0.246240952 | -0.569954776 | 3.636938547 | -0.156712787 | 0.875471209 | NA |
| Gm5582        | 0.246240952 | -0.569954776 | 3.636938547 | -0.156712787 | 0.875471209 | NA |
| Gm5861        | 0.246240952 | -0.569954776 | 3.636938547 | -0.156712787 | 0.875471209 | NA |
| Gm8101        | 0.246240952 | -0.569954776 | 3.636938547 | -0.156712787 | 0.875471209 | NA |
| Gm8428        | 0.246240952 | -0.569954776 | 3.636938547 | -0.156712787 | 0.875471209 | NA |
| Gm8816        | 0.246240952 | -0.569954776 | 3.636938547 | -0.156712787 | 0.875471209 | NA |

|               |             |              |             |              |              |             |             |
|---------------|-------------|--------------|-------------|--------------|--------------|-------------|-------------|
| Ighv5-2       | 0.246240952 | -0.569954776 | 3.636938547 | -0.156712787 | 0.875471209  | NA          |             |
| Igkv8-18      | 0.246240952 | -0.569954776 | 3.636938547 | -0.156712787 | 0.875471209  | NA          |             |
| Olfr101       | 0.246240952 | -0.569954776 | 3.636938547 | -0.156712787 | 0.875471209  | NA          |             |
| Psap1         | 0.246240952 | -0.569954776 | 3.636938547 | -0.156712787 | 0.875471209  | NA          |             |
| Tas2r138      | 0.246240952 | -0.569954776 | 3.636938547 | -0.156712787 | 0.875471209  | NA          |             |
| Tcerg1l       | 0.246240952 | -0.569954776 | 3.636938547 | -0.156712787 | 0.875471209  | NA          |             |
| Traj37        | 0.246240952 | -0.569954776 | 3.636938547 | -0.156712787 | 0.875471209  | NA          |             |
| Trav13n-4     | 0.246240952 | -0.569954776 | 3.636938547 | -0.156712787 | 0.875471209  | NA          |             |
| Trav9-2       | 0.246240952 | -0.569954776 | 3.636938547 | -0.156712787 | 0.875471209  | NA          |             |
| Trbj2-6       | 0.246240952 | -0.569954776 | 3.636938547 | -0.156712787 | 0.875471209  | NA          |             |
| 3425401B19Rik | 0.246240952 | -0.569954776 | 3.636938547 | -0.156712787 | 0.875471209  | NA          |             |
| 4933403O08Rik | 0.258614326 | -0.569954776 | 3.636938547 | -0.156712787 | 0.875471209  | NA          |             |
| A630023A22Rik | 0.258614326 | -0.569954776 | 3.636938547 | -0.156712787 | 0.875471209  | NA          |             |
| Gm10418       | 0.258614326 | -0.569954776 | 3.636938547 | -0.156712787 | 0.875471209  | NA          |             |
| Gm11945       | 0.258614326 | -0.569954776 | 3.636938547 | -0.156712787 | 0.875471209  | NA          |             |
| Gm13131       | 0.258614326 | -0.569954776 | 3.636938547 | -0.156712787 | 0.875471209  | NA          |             |
| Gm13306       | 0.258614326 | -0.569954776 | 3.636938547 | -0.156712787 | 0.875471209  | NA          |             |
| Gm2399        | 0.258614326 | -0.569954776 | 3.636938547 | -0.156712787 | 0.875471209  | NA          |             |
| Gm34417       | 0.258614326 | -0.569954776 | 3.636938547 | -0.156712787 | 0.875471209  | NA          |             |
| Gm4864        | 0.258614326 | -0.569954776 | 3.636938547 | -0.156712787 | 0.875471209  | NA          |             |
| Gm5700        | 0.258614326 | -0.569954776 | 3.636938547 | -0.156712787 | 0.875471209  | NA          |             |
| Gm5864        | 0.258614326 | -0.569954776 | 3.636938547 | -0.156712787 | 0.875471209  | NA          |             |
| Gm6829        | 0.258614326 | -0.569954776 | 3.636938547 | -0.156712787 | 0.875471209  | NA          |             |
| Gm6877        | 0.258614326 | -0.569954776 | 3.636938547 | -0.156712787 | 0.875471209  | NA          |             |
| Gm8588        | 0.258614326 | -0.569954776 | 3.636938547 | -0.156712787 | 0.875471209  | NA          |             |
| ltpa-ps1      | 0.258614326 | -0.569954776 | 3.636938547 | -0.156712787 | 0.875471209  | NA          |             |
| LOC665443     | 0.258614326 | -0.569954776 | 3.636938547 | -0.156712787 | 0.875471209  | NA          |             |
| Olfr1018      | 0.258614326 | -0.569954776 | 3.636938547 | -0.156712787 | 0.875471209  | NA          |             |
| Olfr1253      | 0.258614326 | -0.569954776 | 3.636938547 | -0.156712787 | 0.875471209  | NA          |             |
| Olfr1508      | 0.258614326 | -0.569954776 | 3.636938547 | -0.156712787 | 0.875471209  | NA          |             |
| Olfr679       | 0.258614326 | -0.569954776 | 3.636938547 | -0.156712787 | 0.875471209  | NA          |             |
| Trav14d-3-dv8 | 0.258614326 | -0.569954776 | 3.636938547 | -0.156712787 | 0.875471209  | NA          |             |
| AC140365.1    | 0.272753915 | -0.569954777 | 3.636938547 | -0.156712787 | 0.875471209  | NA          |             |
| Cfap58        | 0.273033106 | -0.569954777 | 3.636938547 | -0.156712787 | 0.875471209  | NA          |             |
| D930007J09Rik | 0.273033106 | -0.569954777 | 3.636938547 | -0.156712787 | 0.875471209  | NA          |             |
| Gm11559       | 0.273033106 | -0.569954777 | 3.636938547 | -0.156712787 | 0.875471209  | NA          |             |
| Gm13080       | 0.273033106 | -0.569954777 | 3.636938547 | -0.156712787 | 0.875471209  | NA          |             |
| Gm2098        | 0.273033106 | -0.569954777 | 3.636938547 | -0.156712787 | 0.875471209  | NA          |             |
| Il4           | 0.273033106 | -0.569954777 | 3.636938547 | -0.156712787 | 0.875471209  | NA          |             |
| Lhb           | 0.273033106 | -0.569954777 | 3.636938547 | -0.156712787 | 0.875471209  | NA          |             |
| Rtl9          | 0.273033106 | -0.569954777 | 3.636938547 | -0.156712787 | 0.875471209  | NA          |             |
| Slc17a6       | 0.273033106 | -0.569954777 | 3.636938547 | -0.156712787 | 0.875471209  | NA          |             |
| Uba52-ps      | 0.273033106 | -0.569954777 | 3.636938547 | -0.156712787 | 0.875471209  | NA          |             |
| AU015228      | 0.273033106 | -0.569954777 | 3.636938547 | -0.156712787 | 0.875471209  | NA          |             |
| BC080695      | 0.273033106 | -0.569954777 | 3.636938547 | -0.156712787 | 0.875471209  | NA          |             |
| Gm11362       | 0.273033106 | -0.569954777 | 3.636938547 | -0.156712787 | 0.875471209  | NA          |             |
| Gm17782       | 0.273033106 | -0.569954777 | 3.636938547 | -0.156712787 | 0.875471209  | NA          |             |
| Gm28594       | 0.273033106 | -0.569954777 | 3.636938547 | -0.156712787 | 0.875471209  | NA          |             |
| Gm38100       | 0.273033106 | -0.569954777 | 3.636938547 | -0.156712787 | 0.875471209  | NA          |             |
| Gm5281        | 0.273033106 | -0.569954777 | 3.636938547 | -0.156712787 | 0.875471209  | NA          |             |
| LT629151.9    | 0.273033106 | -0.569954777 | 3.636938547 | -0.156712787 | 0.875471209  | NA          |             |
| Mc5r          | 0.273033106 | -0.569954777 | 3.636938547 | -0.156712787 | 0.875471209  | NA          |             |
| Rgr           | 0.273033106 | -0.569954777 | 3.636938547 | -0.156712787 | 0.875471209  | NA          |             |
| Vax1          | 0.273033106 | -0.569954777 | 3.636938547 | -0.156712787 | 0.875471209  | NA          |             |
| Zfp541        | 0.273033106 | -0.569954777 | 3.636938547 | -0.156712787 | 0.875471209  | NA          |             |
| Mpp1          | 971.1670789 | -0.570418271 | 0.248064535 | -2.299475301 | 0.021477964  | 0.040052104 |             |
|               | 10-Sep      | 323.9888359  | -0.57060533 | 0.204753966  | -2.786785243 | 0.005323374 | 0.011511021 |
| Tnfsf12       | 312.3588759 | -0.570607569 | 0.16627057  | -3.431801372 | 0.000599587  | 0.00157884  |             |
| Tmed3         | 388.748285  | -0.570886468 | 0.201297907 | -2.836027843 | 0.004567846  | 0.010017063 |             |
| Gm9095        | 0.235775021 | -0.571040764 | 3.636885839 | -0.157013662 | 0.875234081  | NA          |             |
| Fam187b       | 110.7046034 | -0.571149532 | 0.27215624  | -2.098608993 | 0.035851383  | 0.062938356 |             |
| Rapgef1       | 1002.230835 | -0.571153562 | 0.215502634 | -2.650332165 | 0.008041267  | 0.016705766 |             |
| Gm8454        | 4.015991893 | -0.572246639 | 0.981135299 | -0.583249465 | 0.559725376  | 0.644830262 |             |
| Nop56         | 938.4599933 | -0.572448902 | 0.223252269 | -2.564134756 | 0.010343338  | 0.020939701 |             |
| Amer1         | 153.5809372 | -0.572960358 | 0.252705874 | -2.267301306 | 0.023371826  | 0.043201007 |             |
| Kcnh6         | 0.225344634 | -0.573123394 | 3.635752899 | -0.157635409 | 0.8747441    | NA          |             |

|               |             |              |             |              |                |             |
|---------------|-------------|--------------|-------------|--------------|----------------|-------------|
| Cul4b         | 593.7055191 | -0.573291797 | 0.237962734 | -2.409166295 | 0.015989011    | 0.030831428 |
| Rab38         | 16.89727367 | -0.573456162 | 0.712410546 | -0.804951815 | 0.420847486    | 0.512655087 |
| Rif1          | 331.78766   | -0.573501177 | 0.26307677  | -2.179976502 | 0.029259203    | 0.052606085 |
| Gipc1         | 295.2968943 | -0.574315712 | 0.22778567  | -2.52129869  | 0.011692256    | 0.023354373 |
| Pofut2        | 478.2573561 | -0.574441634 | 0.163990215 | -3.502901891 | 0.000460219    | 0.001237315 |
| Olf1r510      | 1.102587848 | -0.574466091 | 1.91320048  | -0.300264451 | 0.763975447 NA |             |
| Zdhhc24       | 106.5413618 | -0.574536964 | 0.243792448 | -2.35666432  | 0.018439907    | 0.034956471 |
| BC106179      | 28.28088359 | -0.574757248 | 0.426684715 | -1.34703032  | 0.177970468    | 0.251599679 |
| Dbnl          | 596.8269211 | -0.575228839 | 0.188507394 | -3.051492184 | 0.002277707    | 0.005323572 |
| Gm12693       | 2.18746888  | -0.575319874 | 2.363386858 | -0.243430258 | 0.807672106    | 0.856293163 |
| E2f3          | 213.7294119 | -0.575455806 | 0.232602873 | -2.473984087 | 0.013361565    | 0.026243019 |
| Khdrbs2       | 2.833770091 | -0.575724528 | 1.174254937 | -0.490289212 | 0.62392926     | 0.703162955 |
| Pggt1b        | 137.0611078 | -0.575979381 | 0.257564629 | -2.236251861 | 0.025335278    | 0.046357821 |
| Arpc5         | 1664.231398 | -0.576008295 | 0.130544775 | -4.412342772 | 1.02E-05       | 3.61E-05    |
| 8030474K03Rik | 0.737826894 | -0.576090331 | 2.357014834 | -0.244415234 | 0.806909245 NA |             |
| Arpc4         | 1235.371882 | -0.576394633 | 0.158572861 | -3.63488827  | 0.000278101    | 0.000777479 |
| Poglut1       | 282.8656653 | -0.576440368 | 0.173471502 | -3.322968675 | 0.000890649    | 0.002270643 |
| Npat          | 156.3230381 | -0.576612383 | 0.19469362  | -2.96163985  | 0.003060055    | 0.006967786 |
| Gm16200       | 1.154561377 | -0.577041993 | 1.733483516 | -0.33288     | 0.739224867 NA |             |
| Exoc8         | 164.6342571 | -0.577194575 | 0.233596479 | -2.470904429 | 0.013477183    | 0.026442516 |
| Cfap43        | 0.703805342 | -0.577395522 | 2.441462254 | -0.236495657 | 0.813048077 NA |             |
| Cstf3         | 391.974607  | -0.577589051 | 0.212904654 | -2.712900076 | 0.006669722    | 0.014103872 |
| Gm4767        | 6.916805485 | -0.577652864 | 1.228440785 | -0.470232568 | 0.638188869    | 0.715449716 |
| Slf2          | 445.302512  | -0.577685275 | 0.173792173 | -3.324000532 | 0.00088736     | 0.002263612 |
| Cnot1         | 1600.120345 | -0.577730989 | 0.209293703 | -2.760383996 | 0.005773346    | 0.012391288 |
| Tapbpl        | 459.52678   | -0.577788523 | 0.154362705 | -3.743057772 | 0.000181794    | 0.000525472 |
| Olf1r15       | 1.111748624 | -0.577994744 | 2.21080897  | -0.261440383 | 0.793752918 NA |             |
| Abrac1        | 235.6324043 | -0.578096013 | 0.26401819  | -2.18960676  | 0.028552768    | 0.051526156 |
| Rnf2          | 466.8295258 | -0.57812559  | 0.175621462 | -3.291884628 | 0.000995184    | 0.002509881 |
| Pkp4          | 1989.696541 | -0.578380916 | 0.140806747 | -4.107622162 | 4.00E-05       | 0.000128633 |
| Pfkfb3        | 493.269357  | -0.579176581 | 0.367610036 | -1.575518958 | 0.115136706    | 0.17425875  |
| Wdr6          | 522.1834635 | -0.579522228 | 0.201978232 | -2.869231382 | 0.004114707    | 0.009118357 |
| Fyb2          | 243.6607459 | -0.579639709 | 0.266192129 | -2.177523846 | 0.029441505    | 0.052889228 |
| Camk4         | 5.996103622 | -0.579648981 | 0.832221244 | -0.696508273 | 0.486110578    | 0.57634141  |
| Wdr47         | 62.39730274 | -0.579745797 | 0.339236958 | -1.708970037 | 0.0874565      | 0.137732534 |
| Qser1         | 494.587086  | -0.579796698 | 0.202162775 | -2.867969619 | 0.004131152    | 0.009151232 |
| Slc7a13       | 1.5030248   | -0.579913523 | 1.837597737 | -0.31558241  | 0.75231949 NA  |             |
| Ovgp1         | 50.95565783 | -0.579919124 | 0.478670637 | -1.211520156 | 0.225696115    | 0.30722352  |
| Sertad2       | 440.1901278 | -0.580202197 | 0.234706359 | -2.47203442  | 0.013434658    | 0.026368184 |
| Cyb561a3      | 170.6201983 | -0.580288752 | 0.232467002 | -2.496219884 | 0.012552477    | 0.024851309 |
| Pou2af1       | 16.84064358 | -0.58123038  | 0.66013082  | -0.88047757  | 0.378600651    | 0.470641964 |
| Fabp7         | 19.79655463 | -0.581858981 | 0.761231561 | -0.764365286 | 0.444649589    | 0.535829943 |
| Kng2          | 7340.610528 | -0.581934943 | 0.182516687 | -3.188393086 | 0.001430659    | 0.003497258 |
| Wiz           | 586.6907312 | -0.581935951 | 0.154921842 | -3.756319602 | 0.00017243     | 0.000501552 |
| Dqx1          | 391.0368936 | -0.582200512 | 0.160660625 | -3.623790909 | 0.000290316    | 0.000808711 |
| Cryz11        | 376.4683758 | -0.582457523 | 0.233809346 | -2.491164417 | 0.012732518    | 0.02516392  |
| Trmt2a        | 567.0585109 | -0.582488292 | 0.186713795 | -3.119685357 | 0.001810443    | 0.004318516 |
| Dusp13        | 4.51952986  | -0.582732126 | 1.020455583 | -0.571050946 | 0.567965109    | 0.652119422 |
| Cacul1        | 1720.308059 | -0.58275844  | 0.225817642 | -2.580659489 | 0.009861179    | 0.020039741 |
| Krt26         | 0.621020132 | -0.583121833 | 2.193788542 | -0.265805852 | 0.790388736 NA |             |
| Mark2         | 709.2187034 | -0.583222515 | 0.222581453 | -2.620265563 | 0.008786132    | 0.018074813 |
| Telo2         | 219.3302228 | -0.583687665 | 0.253109372 | -2.306068956 | 0.02110678     | 0.039428926 |
| Gm6344        | 2.18628409  | -0.583805824 | 2.14876737  | -0.271693359 | 0.785857808    | 0.83801238  |
| Mef2a         | 849.3737371 | -0.584961551 | 0.16136138  | -3.625164532 | 0.000288778    | 0.000804556 |
| Ddx39         | 440.5985553 | -0.585510239 | 0.173903219 | -3.36687407  | 0.000760254    | 0.001961117 |
| Gm44411       | 0.633671814 | -0.585877047 | 3.560874321 | -0.164531796 | 0.869312518 NA |             |
| Xpo1          | 798.5471138 | -0.585898567 | 0.18512103  | -3.164948724 | 0.001551103    | 0.00375667  |
| Pdcl3         | 390.2950218 | -0.585980476 | 0.162363427 | -3.609066937 | 0.0003073      | 0.00085157  |
| Stim1         | 628.8827809 | -0.586030288 | 0.254560603 | -2.302124842 | 0.021328133    | 0.039800567 |
| Syn1          | 3.773130228 | -0.586275187 | 1.330395082 | -0.440677506 | 0.659446483    | 0.733971642 |
| Rin3          | 503.4182323 | -0.586318388 | 0.18695188  | -3.136199474 | 0.001711527    | 0.004106124 |
| Rai14         | 1008.379916 | -0.586459393 | 0.239792082 | -2.445699574 | 0.014457141    | 0.028170687 |
| Tcf20         | 588.767067  | -0.586945088 | 0.200648726 | -2.925237058 | 0.003441939    | 0.007749363 |
| Ncstn         | 1160.695375 | -0.587202717 | 0.151025346 | -3.888107085 | 0.000101029    | 0.00030511  |
| Fbxo45        | 195.5186318 | -0.588122042 | 0.178947509 | -3.286561771 | 0.001014185    | 0.002554644 |
| Sh2d5         | 9.480334156 | -0.588242041 | 0.686917835 | -0.856349932 | 0.39180425     | 0.4843712   |



|               |             |              |             |              |                |             |
|---------------|-------------|--------------|-------------|--------------|----------------|-------------|
| Pofut1        | 370.6460101 | -0.588370341 | 0.216695002 | -2.715200329 | 0.006623569    | 0.014020189 |
| H1f0          | 3344.78574  | -0.588663183 | 0.126093095 | -4.668480735 | 3.03E-06       | 1.15E-05    |
| Rab11fip2     | 186.5378103 | -0.588678156 | 0.175889491 | -3.34686371  | 0.000817314    | 0.002095588 |
| Plekhg6       | 338.6272857 | -0.58895801  | 0.285228042 | -2.064867135 | 0.038935574    | 0.06778042  |
| Dhx9          | 1548.584679 | -0.589276552 | 0.198746096 | -2.964971705 | 0.003027108    | 0.00689645  |
| Chga          | 1.252430878 | -0.589417306 | 1.739111454 | -0.33891865  | 0.734671014 NA |             |
| Chd4          | 2568.508694 | -0.589470625 | 0.170645779 | -3.454352214 | 0.000551616    | 0.001462968 |
| Nsg1          | 21.57660706 | -0.589639092 | 0.422051754 | -1.397077697 | 0.162390208    | 0.232621483 |
| Trim3         | 457.0100503 | -0.589760774 | 0.250094379 | -2.358152859 | 0.018366128    | 0.034837227 |
| Itsn1         | 843.0302121 | -0.589856208 | 0.174613831 | -3.378061195 | 0.000729988    | 0.001888443 |
| Cdk5rap2      | 167.6186501 | -0.591177677 | 0.398473248 | -1.483606943 | 0.137913226    | 0.202660245 |
| Guca1b        | 11.58703037 | -0.591193693 | 0.553509196 | -1.068082875 | 0.28548313     | 0.373747273 |
| Etnk1         | 1635.165152 | -0.591236239 | 0.124570956 | -4.746180461 | 2.07E-06       | 7.99E-06    |
| Thumpd2       | 83.97220509 | -0.591317151 | 0.263890276 | -2.240769001 | 0.025041042    | 0.045882633 |
| Gm6885        | 0.204854217 | -0.591363568 | 3.636586027 | -0.162615036 | 0.870821548 NA |             |
| Rps21         | 2635.554243 | -0.591417504 | 0.160860965 | -3.676575636 | 0.000236386    | 0.000670422 |
| Gm45756       | 0.204837831 | -0.591520983 | 3.636593006 | -0.16265801  | 0.87078771 NA  |             |
| Gm44254       | 0.204831431 | -0.591582744 | 3.636595744 | -0.162674871 | 0.870774433 NA |             |
| Gm13156       | 0.204830732 | -0.591589501 | 3.636596043 | -0.162676716 | 0.870772981 NA |             |
| Gm12540       | 0.221202816 | -0.591638738 | 3.636598226 | -0.162690157 | 0.870762397 NA |             |
| Gm13650       | 0.204822952 | -0.59166481  | 3.636599381 | -0.162697275 | 0.870756793 NA |             |
| Sigirr        | 415.2714136 | -0.591691205 | 0.182561445 | -3.241052378 | 0.001190893    | 0.002960388 |
| Insl5         | 0.204818935 | -0.591703781 | 3.636601107 | -0.162707914 | 0.870748415 NA |             |
| Snrp1c-ps2    | 0.221182758 | -0.591754751 | 3.636603366 | -0.162721829 | 0.870737459 NA |             |
| Gm12754       | 0.204804658 | -0.591842821 | 3.636607266 | -0.162745872 | 0.870718528 NA |             |
| Rpl28-ps3     | 0.221149819 | -0.5919461   | 3.63661184  | -0.162774067 | 0.870696327 NA |             |
| Gm5558        | 0.204777556 | -0.592108974 | 3.636619049 | -0.162818532 | 0.870661317 NA |             |
| Gm12857       | 0.204733047 | -0.592552604 | 3.636638668 | -0.162939642 | 0.870565958 NA |             |
| Tsga10ip      | 0.221037084 | -0.592609017 | 3.636641161 | -0.162955043 | 0.870553832 NA |             |
| Dppa5b        | 0.228283094 | -0.592715288 | 3.636645856 | -0.162984055 | 0.870530989 NA |             |
| Dppa5c        | 0.228283094 | -0.592715288 | 3.636645856 | -0.162984055 | 0.870530989 NA |             |
| lqcd          | 6.926859502 | -0.592748195 | 0.831402229 | -0.712949971 | 0.475876716    | 0.566690853 |
| Rps8-ps3      | 0.204712634 | -0.592758876 | 3.636647781 | -0.162995954 | 0.87052162 NA  |             |
| Pak4          | 413.7868404 | -0.592868015 | 0.195736341 | -3.028911293 | 0.002454367    | 0.005698223 |
| Gm15791       | 0.228241798 | -0.592923589 | 3.636655055 | -0.163040921 | 0.870486216 NA |             |
| Tff1          | 0.22823596  | -0.592953125 | 3.636656359 | -0.163048984 | 0.870479867 NA |             |
| Rpl29-ps2     | 13.80383217 | -0.593023193 | 0.654591135 | -0.905944432 | 0.364965265    | 0.457275472 |
| Gm12848       | 0.204665167 | -0.59324562  | 3.636669265 | -0.163128835 | 0.870416997 NA |             |
| Tmed6         | 0.204660272 | -0.593296397 | 3.636671504 | -0.163142697 | 0.870406083 NA |             |
| Gm7560        | 0.20465995  | -0.593299747 | 3.636671652 | -0.163143612 | 0.870405363 NA |             |
| Gm6650        | 0.22815837  | -0.593347846 | 3.636673773 | -0.163156742 | 0.870395024 NA |             |
| Gm38655       | 0.204654881 | -0.593352446 | 3.636673976 | -0.163157998 | 0.870394036 NA |             |
| Gm3791        | 0.220896381 | -0.593454493 | 3.636678475 | -0.163185857 | 0.870372102 NA |             |
| Gm11793       | 0.204644906 | -0.593456527 | 3.636678564 | -0.163186412 | 0.870371664 NA |             |
| Gm11639       | 0.709650204 | -0.593512475 | 2.395054439 | -0.247807509 | 0.804283345 NA |             |
| Gm5717        | 0.204636026 | -0.593549567 | 3.636682665 | -0.163211812 | 0.870351666 NA |             |
| Smyd5         | 444.026847  | -0.593552963 | 0.18867263  | -3.145941009 | 0.001655534    | 0.003988522 |
| Nps           | 0.220878373 | -0.59356421  | 3.636683311 | -0.163215809 | 0.870348519 NA |             |
| Gm6680        | 0.220857241 | -0.593693403 | 3.636689003 | -0.163251079 | 0.87032075 NA  |             |
| 4930505A04Rik | 0.228073191 | -0.593785869 | 3.636693075 | -0.163276322 | 0.870300876 NA |             |
| Gm18227       | 0.204608296 | -0.593842558 | 3.636695571 | -0.163291798 | 0.870288692 NA |             |
| Duxf3         | 0.204607464 | -0.593851413 | 3.636695961 | -0.163294215 | 0.870286788 NA |             |
| Hesx1         | 0.228060076 | -0.593853755 | 3.636696065 | -0.163294855 | 0.870286285 NA |             |
| Art5          | 0.204606039 | -0.593866577 | 3.636696628 | -0.163298355 | 0.870283529 NA |             |
| Dnajb7        | 0.220811824 | -0.593972734 | 3.636701302 | -0.163327336 | 0.870260712 NA |             |
| Gm10653       | 0.228031526 | -0.594001951 | 3.636702588 | -0.163335312 | 0.870254433 NA |             |
| Gm5301        | 0.20458899  | -0.594048784 | 3.636704649 | -0.163348097 | 0.870244366 NA |             |
| Gm10277       | 0.204584643 | -0.594095479 | 3.636706703 | -0.163360845 | 0.87023433 NA  |             |
| Phox2a        | 0.228006893 | -0.594130278 | 3.636708235 | -0.163370345 | 0.870226851 NA |             |
| St6galnac1    | 0.220773337 | -0.594211233 | 3.636711796 | -0.163392445 | 0.870209451 NA |             |
| 4933427G23Rik | 0.220770945 | -0.59422611  | 3.63671245  | -0.163396507 | 0.870206253 NA |             |
| Olfr1427      | 0.204572418 | -0.594227306 | 3.636712502 | -0.163396833 | 0.870205996 NA |             |
| Efhc2         | 0.220770238 | -0.594230509 | 3.636712644 | -0.163397707 | 0.870205308 NA |             |
| Olfr52        | 0.220766993 | -0.594250706 | 3.636713532 | -0.163403221 | 0.870200967 NA |             |
| Zar1          | 0.227980372 | -0.594268919 | 3.636714333 | -0.163408193 | 0.870197052 NA |             |
| Gpr149        | 0.204567036 | -0.594285587 | 3.636715066 | -0.163412744 | 0.87019347 NA  |             |



|            |             |              |             |              |             |    |             |
|------------|-------------|--------------|-------------|--------------|-------------|----|-------------|
| Gjd2       | 0.22797423  | -0.594301102 | 3.636715749 | -0.163416979 | 0.870190135 | NA |             |
| Lingo3     | 0.220758724 | -0.594302229 | 3.636715798 | -0.163417287 | 0.870189893 | NA |             |
| Olfr488    | 0.204565496 | -0.594302299 | 3.636715801 | -0.163417306 | 0.870189878 | NA |             |
| Gm6418     | 0.220757467 | -0.594310068 | 3.636716143 | -0.163419427 | 0.870188208 | NA |             |
| Olfr670    | 0.220756195 | -0.594318001 | 3.636716491 | -0.163421593 | 0.870186503 | NA |             |
| Cfap57     | 0.220756027 | -0.594319044 | 3.636716537 | -0.163421877 | 0.870186279 | NA |             |
| Myrf1      | 0.227970698 | -0.59431962  | 3.636716563 | -0.163422035 | 0.870186155 | NA |             |
| Gpr17      | 0.204563282 | -0.594326328 | 3.636716857 | -0.163423866 | 0.870184713 | NA |             |
| Tacr3      | 0.227965105 | -0.59434896  | 3.636717853 | -0.163430044 | 0.870179849 | NA |             |
| Rtl1       | 0.220744075 | -0.594393688 | 3.636719819 | -0.163442255 | 0.870170236 | NA |             |
| Vmn1r79    | 0.227955682 | -0.594398442 | 3.636720028 | -0.163443553 | 0.870169214 | NA |             |
| Vwa5b1     | 0.220741544 | -0.594409517 | 3.636720515 | -0.163446576 | 0.870166833 | NA |             |
| Slc35d3    | 0.214510542 | -0.594725407 | 3.636734395 | -0.163532813 | 0.87009894  | NA |             |
| Gm11620    | 0.630848796 | -0.594795306 | 2.963165797 | -0.200729674 | 0.840909955 | NA |             |
| Olfr479    | 15.94118625 | -0.595046504 | 0.506621076 | -1.174539576 | 0.24017897  |    | 0.323630341 |
| Gm12933    | 0.214437079 | -0.595285467 | 3.636758974 | -0.163685708 | 0.869978569 | NA |             |
| Gm7908     | 0.214416357 | -0.595445379 | 3.636765985 | -0.163729363 | 0.869944201 | NA |             |
| Nedd4      | 5492.054992 | -0.595562562 | 0.111292672 | -5.351318723 | 8.73E-08    |    | 4.04E-07    |
| Arl14ep    | 323.8556995 | -0.595853208 | 0.189114625 | -3.150751613 | 0.001628509 |    | 0.003929347 |
| Tmsb15b2   | 9.886952379 | -0.596123775 | 0.861291945 | -0.692127423 | 0.488857312 |    | 0.578747299 |
| Fam20b     | 412.080406  | -0.596385981 | 0.154153249 | -3.868786328 | 0.000109378 |    | 0.000328405 |
| Tnrc6b     | 903.9397725 | -0.596586851 | 0.268573492 | -2.221316948 | 0.026329502 |    | 0.047960823 |
| Olfr914    | 7.556570992 | -0.596884916 | 0.733498159 | -0.813751076 | 0.415787568 |    | 0.507870348 |
| Hyal3      | 8.996158078 | -0.597252465 | 0.687417075 | -0.868835655 | 0.384937028 |    | 0.477161816 |
| Ezh1       | 425.708269  | -0.597380763 | 0.154942852 | -3.855490953 | 0.000115498 |    | 0.000345318 |
| Gm14843    | 0.220252749 | -0.597615434 | 3.636860817 | -0.164321777 | 0.869477839 | NA |             |
| Hace1      | 139.9617956 | -0.59769838  | 0.348614206 | -1.714498058 | 0.086437293 |    | 0.136278829 |
| Gm16412    | 0.214101416 | -0.597991115 | 3.636877177 | -0.164424336 | 0.869397107 | NA |             |
| Brox       | 640.4769755 | -0.598010248 | 0.168688178 | -3.545063185 | 0.000392519 |    | 0.001068614 |
| Ipo5       | 1050.703675 | -0.598056019 | 0.117661731 | -5.082842246 | 3.72E-07    |    | 1.59E-06    |
| G3bp1      | 1559.992409 | -0.598440264 | 0.118958707 | -5.030655434 | 4.89E-07    |    | 2.05E-06    |
| Gm19801    | 8.482454843 | -0.598529833 | 0.851804406 | -0.702661114 | 0.482266967 |    | 0.572540895 |
| Cnot6      | 1053.151599 | -0.598860635 | 0.164908795 | -3.631465717 | 0.000281816 |    | 0.000786894 |
| Arhgef7    | 704.554096  | -0.598970853 | 0.174251261 | -3.43739752  | 0.000587333 |    | 0.001550937 |
| Cish       | 536.578541  | -0.599008392 | 0.426475588 | -1.404554935 | 0.160153665 |    | 0.229997446 |
| Exoc4      | 510.6154492 | -0.599024115 | 0.236992414 | -2.527608816 | 0.011484223 |    | 0.023008936 |
| AC119998.1 | 0.213946359 | -0.599334226 | 3.63693553  | -0.164790995 | 0.869108492 | NA |             |
| Dcaf15     | 223.6236246 | -0.599967613 | 0.217236381 | -2.761819217 | 0.00574803  |    | 0.012341608 |
| Tep1       | 532.2954585 | -0.60019192  | 0.275115235 | -2.181601899 | 0.029138927 |    | 0.052417476 |
| Prpf38a    | 173.1446152 | -0.600330796 | 0.254407186 | -2.359724211 | 0.018288526 |    | 0.034719686 |
| Sftpa1     | 53.12358862 | -0.600376449 | 0.365202834 | -1.643953423 | 0.100185824 |    | 0.154637205 |
| Tomm40l    | 330.2806643 | -0.60043161  | 0.244248578 | -2.45828088  | 0.013960394 |    | 0.027296102 |
| Rpl17-ps5  | 4.910228373 | -0.600970914 | 1.034275692 | -0.581054856 | 0.561203483 |    | 0.646183775 |
| Gm13669    | 0.690398679 | -0.601030302 | 2.771878836 | -0.216831376 | 0.828339759 | NA |             |
| Lpin3      | 223.5876627 | -0.601201942 | 0.353344246 | -1.70146238  | 0.088856196 |    | 0.139666277 |
| Pkn1       | 853.4225937 | -0.601245429 | 0.169645674 | -3.544124738 | 0.000393919 |    | 0.001072083 |
| Rfx8       | 0.720315514 | -0.601724204 | 2.836526319 | -0.212151179 | 0.831989093 | NA |             |
| Hspa14     | 399.5774674 | -0.602418227 | 0.190379386 | -3.164303864 | 0.001554544 |    | 0.0037634   |
| Smg7       | 1072.187661 | -0.602444368 | 0.257167933 | -2.342610761 | 0.019149349 |    | 0.036157645 |
| Ppp1r13l   | 109.4206353 | -0.602486862 | 0.284348747 | -2.118830726 | 0.034104775 |    | 0.060263081 |
| Gria1      | 0.631003349 | -0.603247626 | 2.191721213 | -0.275239215 | 0.783132461 | NA |             |
| Kank2      | 930.206668  | -0.603305908 | 0.145756269 | -4.13914208  | 3.49E-05    |    | 0.000113287 |
| Map3k3     | 365.0059362 | -0.603452727 | 0.186104973 | -3.24253951  | 0.001184695 |    | 0.002945841 |
| Nckipsd    | 158.500771  | -0.6042767   | 0.328158926 | -1.841414789 | 0.065560797 |    | 0.106781358 |
| Slbp       | 362.5685561 | -0.604307637 | 0.24051221  | -2.512586099 | 0.011984986 |    | 0.0238608   |
| Zswim1     | 66.49928159 | -0.60458211  | 0.387987638 | -1.558250962 | 0.119173769 |    | 0.179333958 |
| Gm11783    | 0.181934725 | -0.604680054 | 3.636574771 | -0.16627736  | 0.867938682 | NA |             |
| Gng10      | 144.8492684 | -0.604889699 | 0.231883838 | -2.608589305 | 0.009091629 |    | 0.018638057 |
| Rhbdl2     | 6.417103405 | -0.604895911 | 0.922854403 | -0.655461912 | 0.512170402 |    | 0.601383085 |
| Poglut2    | 326.2421287 | -0.60528191  | 0.177546776 | -3.409140523 | 0.000651679 |    | 0.001703699 |
| Ptma       | 7774.914271 | -0.605409197 | 0.157204877 | -3.851084063 | 0.000117596 |    | 0.000350977 |
| Arhgap4    | 194.9623974 | -0.605943537 | 0.335616411 | -1.805464562 | 0.071002016 |    | 0.114549292 |
| Sic16a6    | 251.3590938 | -0.606092679 | 0.240721303 | -2.517819039 | 0.011808397 |    | 0.023550486 |
| Enpp4      | 230.099511  | -0.606265349 | 0.182279375 | -3.326022763 | 0.000880947 |    | 0.002250283 |
| Btbd9      | 300.0402526 | -0.606953499 | 0.228810361 | -2.652648663 | 0.007986295 |    | 0.016605727 |
| Ikzf3      | 23.2932298  | -0.606991705 | 0.654939203 | -0.926790917 | 0.354035102 |    | 0.446518489 |

|               |             |              |             |              |             |    |             |
|---------------|-------------|--------------|-------------|--------------|-------------|----|-------------|
| Vmn2r4        | 0.225910414 | -0.607138691 | 3.637270623 | -0.166921506 | 0.867431811 | NA |             |
| Tamm41        | 112.9090035 | -0.607222861 | 0.258895857 | -2.345432897 | 0.019004999 |    | 0.03591987  |
| Olfr544       | 0.18284097  | -0.607278643 | 3.636614011 | -0.166990129 | 0.867377816 | NA |             |
| A430089119Rik | 0.18284097  | -0.607278643 | 3.636614011 | -0.166990129 | 0.867377816 | NA |             |
| Cbln1         | 0.18284097  | -0.607278643 | 3.636614011 | -0.166990129 | 0.867377816 | NA |             |
| Cnksr2        | 0.18284097  | -0.607278643 | 3.636614011 | -0.166990129 | 0.867377816 | NA |             |
| Gdap111       | 0.18284097  | -0.607278643 | 3.636614011 | -0.166990129 | 0.867377816 | NA |             |
| Gm19211       | 0.18284097  | -0.607278643 | 3.636614011 | -0.166990129 | 0.867377816 | NA |             |
| Gm4342        | 0.18284097  | -0.607278643 | 3.636614011 | -0.166990129 | 0.867377816 | NA |             |
| Gm45647       | 0.18284097  | -0.607278643 | 3.636614011 | -0.166990129 | 0.867377816 | NA |             |
| Gm5518        | 0.18284097  | -0.607278643 | 3.636614011 | -0.166990129 | 0.867377816 | NA |             |
| Gm8091        | 0.18284097  | -0.607278643 | 3.636614011 | -0.166990129 | 0.867377816 | NA |             |
| Ighv1-11      | 0.18284097  | -0.607278643 | 3.636614011 | -0.166990129 | 0.867377816 | NA |             |
| Igkv14-130    | 0.18284097  | -0.607278643 | 3.636614011 | -0.166990129 | 0.867377816 | NA |             |
| Kansl2-ps     | 0.18284097  | -0.607278643 | 3.636614011 | -0.166990129 | 0.867377816 | NA |             |
| Obox4-ps28    | 0.18284097  | -0.607278643 | 3.636614011 | -0.166990129 | 0.867377816 | NA |             |
| Olfr532       | 0.18284097  | -0.607278643 | 3.636614011 | -0.166990129 | 0.867377816 | NA |             |
| Themis3       | 0.18284097  | -0.607278643 | 3.636614011 | -0.166990129 | 0.867377816 | NA |             |
| Trav14n-3     | 0.18284097  | -0.607278643 | 3.636614011 | -0.166990129 | 0.867377816 | NA |             |
| Gm10352       | 0.18284097  | -0.607278643 | 3.636614011 | -0.166990129 | 0.867377816 | NA |             |
| Gm12691       | 0.18284097  | -0.607278643 | 3.636614011 | -0.166990129 | 0.867377816 | NA |             |
| Gm21987       | 0.18284097  | -0.607278643 | 3.636614011 | -0.166990129 | 0.867377816 | NA |             |
| Gm45910       | 0.18284097  | -0.607278643 | 3.636614011 | -0.166990129 | 0.867377816 | NA |             |
| Tmem200c      | 0.18284097  | -0.607278643 | 3.636614011 | -0.166990129 | 0.867377816 | NA |             |
| Zscan4f       | 0.18284097  | -0.607278643 | 3.636614011 | -0.166990129 | 0.867377816 | NA |             |
| Trex1         | 167.1620053 | -0.607532626 | 0.227859627 | -2.666258316 | 0.007670073 |    | 0.016008743 |
| Rims1         | 2.893488126 | -0.608030362 | 1.40050657  | -0.434150311 | 0.664179293 |    | 0.737577136 |
| Impact        | 367.7971723 | -0.608190532 | 0.201113458 | -3.02411652  | 0.002493604 |    | 0.005780658 |
| Gm4760        | 0.731129003 | -0.608298129 | 2.467984785 | -0.24647564  | 0.80531406  | NA |             |
| Sim1          | 0.641662663 | -0.608325503 | 2.532722762 | -0.240186377 | 0.810185775 | NA |             |
| Thumpd1       | 441.924027  | -0.608357753 | 0.145696688 | -4.17550847  | 2.97E-05    |    | 9.76E-05    |
| Kansl1l       | 543.9895809 | -0.608371105 | 0.288338918 | -2.109916725 | 0.034865529 |    | 0.061429056 |
| Usp13         | 4.879717683 | -0.608371261 | 0.93743957  | -0.648971177 | 0.516357006 |    | 0.604965586 |
| Scgb3a1       | 1.173306569 | -0.608425715 | 1.901967302 | -0.319892836 | 0.749049569 | NA |             |
| Gm8711        | 0.183438788 | -0.608989106 | 3.63663982  | -0.167459286 | 0.86700868  | NA |             |
| Gm29596       | 0.724907702 | -0.60900499  | 2.392589138 | -0.254538057 | 0.799079907 | NA |             |
| Iqck          | 8.977073679 | -0.609549281 | 0.674372128 | -0.903876741 | 0.366060764 |    | 0.458497091 |
| Reep4         | 336.1671963 | -0.609903962 | 0.298946277 | -2.040179156 | 0.041332485 |    | 0.071435138 |
| Trim37        | 232.1952773 | -0.610038771 | 0.241691834 | -2.524035505 | 0.011601621 |    | 0.023201529 |
| Gm7832        | 0.644786111 | -0.61029468  | 2.531619577 | -0.241068874 | 0.809501737 | NA |             |
| Rhoq          | 223.0513369 | -0.610446372 | 0.300757502 | -2.029696246 | 0.042387425 |    | 0.073014127 |
| Gm34653       | 4.425723981 | -0.610576414 | 0.99994525  | -0.610609845 | 0.541457904 |    | 0.628285757 |
| Atp8b4        | 46.60276128 | -0.610760301 | 0.342566923 | -1.782893383 | 0.07460366  |    | 0.119612828 |
| Serpinb2      | 0.39596412  | -0.610776143 | 3.627774131 | -0.168361127 | 0.866299187 | NA |             |
| Ptbp1         | 2640.398225 | -0.610977019 | 0.134313874 | -4.548874967 | 5.39E-06    |    | 1.98E-05    |
| Gm14410       | 87.92017698 | -0.611127672 | 0.32832262  | -1.861363291 | 0.062692891 |    | 0.102669395 |
| Dnajb5        | 118.0840901 | -0.612133242 | 0.288123561 | -2.12455115  | 0.033624084 |    | 0.059497971 |
| Zfp934        | 62.83200486 | -0.612302282 | 0.345866554 | -1.770342564 | 0.076670092 |    | 0.122580111 |
| Ggh           | 280.7341527 | -0.61248667  | 0.218817461 | -2.79907585  | 0.00512491  |    | 0.011115708 |
| Jarid2        | 333.0535029 | -0.612640957 | 0.290128642 | -2.111618326 | 0.034719199 |    | 0.061202865 |
| Asap3         | 435.8232901 | -0.612724316 | 0.18648802  | -3.285596122 | 0.001017668 |    | 0.002561903 |
| Zmynd19       | 216.8429156 | -0.613055416 | 0.240618544 | -2.547831127 | 0.010839493 |    | 0.021817199 |
| Mgst3         | 484.3484986 | -0.613292029 | 0.311833509 | -1.966729077 | 0.049214453 |    | 0.083218408 |
| Lin9          | 103.8919235 | -0.613299492 | 0.288552895 | -2.125431777 | 0.033550601 |    | 0.059394667 |
| Sbk1          | 450.8410796 | -0.613458024 | 0.228738345 | -2.681920355 | 0.007320089 |    | 0.015344014 |
| Zfp936        | 0.679480316 | -0.613468725 | 2.12424274  | -0.288794078 | 0.772738964 | NA |             |
| Gars          | 1326.148508 | -0.613549982 | 0.166197535 | -3.69169124  | 0.000222768 |    | 0.000634544 |
| Tspan18       | 69.23459833 | -0.613585359 | 0.410703582 | -1.493985897 | 0.135179305 |    | 0.199250977 |
| Mphosph9      | 129.1095174 | -0.613619984 | 0.266298864 | -2.304253107 | 0.02120844  |    | 0.039592803 |
| Wsb2          | 1111.484743 | -0.613688983 | 0.227592301 | -2.696439994 | 0.007008502 |    | 0.014748913 |
| Hist1h2ap     | 2.418592827 | -0.613725971 | 1.986610105 | -0.308931264 | 0.757373814 |    | 0.815184594 |
| Trmt6         | 297.4866496 | -0.614599953 | 0.189392712 | -3.245108792 | 0.001174058 |    | 0.002922373 |
| Doc2g         | 108.058747  | -0.614600617 | 0.350464774 | -1.753673013 | 0.079486552 |    | 0.12650175  |
| She           | 61.74898954 | -0.614778819 | 0.268801754 | -2.287108654 | 0.022189482 |    | 0.041252594 |
| H2-Q6         | 836.0615386 | -0.614855373 | 0.226521427 | -2.714336484 | 0.006640868 |    | 0.014049828 |
| C1qtnf2       | 24.30137305 | -0.61504416  | 0.471314328 | -1.304955363 | 0.191908048 |    | 0.267948272 |

|               |             |              |             |              |             |             |
|---------------|-------------|--------------|-------------|--------------|-------------|-------------|
| Cln6          | 141.0622096 | -0.615430092 | 0.278748317 | -2.207834292 | 0.027255827 | 0.049468469 |
| Gzmm          | 3.809680519 | -0.615518359 | 1.109954675 | -0.554543689 | 0.579206815 | 0.662705891 |
| Ndel1         | 595.2309067 | -0.615603491 | 0.228299538 | -2.696472787 | 0.007007812 | 0.014748913 |
| Gm5464        | 2.473320444 | -0.615705937 | 1.276141174 | -0.482474784 | 0.629468707 | 0.708141911 |
| 2610001J05Rik | 371.7321235 | -0.615801825 | 0.247974541 | -2.483326807 | 0.013016161 | 0.025635341 |
| Gtf3c5        | 182.8737535 | -0.616225894 | 0.200801152 | -3.068836455 | 0.002148942 | 0.005053126 |
| Ulkl          | 11.92804878 | -0.616571386 | 0.757979064 | -0.813441182 | 0.415965156 | 0.50801447  |
| Mrc1          | 631.7665347 | -0.616611988 | 0.256718813 | -2.401896378 | 0.016310328 | 0.031362336 |
| Fcmr          | 7.370361534 | -0.616614585 | 0.822249987 | -0.749911335 | 0.453308107 | 0.54418679  |
| Nagk          | 358.2266288 | -0.616636429 | 0.199212157 | -3.095375494 | 0.001965639 | 0.004651612 |
| Zbtb1         | 282.8471119 | -0.616749437 | 0.196326693 | -3.14144464  | 0.001681166 | 0.004040676 |
| Kctd18        | 194.1061372 | -0.616910526 | 0.200870376 | -3.071187199 | 0.002132094 | 0.005015585 |
| Dgkz          | 1160.409577 | -0.617004215 | 0.142021344 | -4.344447086 | 1.40E-05    | 4.82E-05    |
| Ccdc78        | 2.580645671 | -0.617579325 | 1.124265053 | -0.549318262 | 0.582787057 | 0.666042351 |
| Aen           | 553.5294655 | -0.617654678 | 0.177661032 | -3.47659062  | 0.000507833 | 0.001354856 |
| Poldip3       | 877.8164222 | -0.617724867 | 0.119200178 | -5.182247844 | 2.19E-07    | 9.67E-07    |
| Trpm7         | 1642.58154  | -0.617736171 | 0.195290521 | -3.163165164 | 0.001560638 | 0.003777616 |
| Zup1          | 145.1245169 | -0.617976789 | 0.237761248 | -2.599148487 | 0.009345534 | 0.019110311 |
| Polr2a        | 1312.826596 | -0.618421316 | 0.176098512 | -3.511791823 | 0.000445097 | 0.001198926 |
| 4931406P16Rik | 479.3495449 | -0.61854798  | 0.314781857 | -1.965005182 | 0.049413638 | 0.083505521 |
| Lin7b         | 1.60261647  | -0.618584803 | 1.680891821 | -0.368009884 | 0.712865865 | NA          |
| Lrsam1        | 253.2119509 | -0.618779628 | 0.21287307  | -2.906800875 | 0.003651456 | 0.008181103 |
| Gm6548        | 145.167819  | -0.618791257 | 0.297218436 | -2.081941029 | 0.037347857 | 0.065309904 |
| Lhfp13        | 0.218087423 | -0.618813922 | 3.637760327 | -0.170108492 | 0.864924815 | NA          |
| Snd1          | 2960.482098 | -0.619323643 | 0.380185886 | -1.629002194 | 0.103312554 | 0.158716088 |
| Tmc8          | 45.87370678 | -0.619493068 | 0.397984402 | -1.55657625  | 0.119571126 | 0.179852529 |
| Gm7785        | 2.666838067 | -0.619500425 | 1.211213738 | -0.511470771 | 0.60902145  | 0.690148742 |
| Fam171a1      | 74.47548539 | -0.6195177   | 0.26598007  | -2.329188425 | 0.019849086 | 0.037325945 |
| Rnd3          | 544.0820633 | -0.619648839 | 0.23843781  | -2.598785984 | 0.009355408 | 0.019124406 |
| Tdrp          | 278.6037191 | -0.619947296 | 0.342988789 | -1.8074856   | 0.070686598 | 0.114094406 |
| Ube2z         | 901.3402969 | -0.620275299 | 0.158822896 | -3.905452634 | 9.40E-05    | 0.000285802 |
| A530016L24Rik | 1.738424018 | -0.620416671 | 1.638261366 | -0.378704329 | 0.704907439 | 0.771474739 |
| Sav1          | 429.0264869 | -0.620694963 | 0.170858716 | -3.632796609 | 0.000280366 | 0.000783297 |
| Myo5b         | 705.2192715 | -0.620843181 | 0.208616734 | -2.975998944 | 0.002920359 | 0.006680031 |
| Arbitram      | 87.13691654 | -0.62097086  | 0.274321304 | -2.26366254  | 0.023594878 | 0.043537773 |
| Uba1y         | 3.206510811 | -0.621217746 | 1.07919912  | -0.575628478 | 0.564866328 | 0.649304913 |
| Zc4h2         | 32.62346893 | -0.621221842 | 0.372418565 | -1.668074312 | 0.095300976 | 0.148224709 |
| Alx4          | 4.0013698   | -0.621795133 | 1.487793474 | -0.41793108  | 0.675997508 | 0.747561334 |
| Nol11         | 271.4523006 | -0.622109686 | 0.227988997 | -2.728682935 | 0.006358781 | 0.013506666 |
| Gm18716       | 8.587845501 | -0.622356844 | 0.694655067 | -0.895922125 | 0.370294357 | 0.462406841 |
| Cacng4        | 4.074183748 | -0.622561009 | 1.177376513 | -0.528769686 | 0.596965229 | 0.679467434 |
| Ccdc153       | 1.908376431 | -0.622749    | 1.476416975 | -0.421797507 | 0.673172825 | 0.745114292 |
| Asb1          | 170.6825824 | -0.622867866 | 0.297867933 | -2.091087344 | 0.036520235 | 0.063987355 |
| Glt8d1        | 278.7373    | -0.622888657 | 0.254549006 | -2.447028438 | 0.014403947 | 0.028073453 |
| Hist1h2bq     | 10.56876337 | -0.623115643 | 0.975415577 | -0.63882068  | 0.522939593 | 0.611265052 |
| Trmt61a       | 111.8893513 | -0.623532216 | 0.333987852 | -1.866930824 | 0.061911249 | 0.101564951 |
| Cluap1        | 165.7072789 | -0.623627445 | 0.230429277 | -2.706372442 | 0.006802271 | 0.014343242 |
| Rnf222        | 2.645018695 | -0.624362172 | 1.245552978 | -0.501273076 | 0.616178951 | 0.696408033 |
| Mfsd11        | 401.2203565 | -0.625042664 | 0.257476779 | -2.427569067 | 0.015200392 | 0.029447305 |
| Ankrd37       | 21.31849983 | -0.625082399 | 0.692848376 | -0.902192197 | 0.366954779 | 0.459346874 |
| Notp2         | 477.7599435 | -0.625364853 | 0.171323733 | -3.650193959 | 0.000262042 | 0.000736692 |
| Gpd1l         | 627.7560117 | -0.625526281 | 0.164800421 | -3.795659495 | 0.000147251 | 0.000433117 |
| Stac3         | 19.5364702  | -0.625545358 | 0.446484944 | -1.401044687 | 0.161200711 | 0.231286796 |
| Mcmcdc2       | 7.685850043 | -0.625809937 | 0.696047656 | -0.899090646 | 0.36860438  | 0.460902803 |
| Cnm4          | 95.21723545 | -0.626054298 | 0.302609919 | -2.068849232 | 0.038560237 | 0.067195637 |
| Mcmcbp        | 606.4308089 | -0.626056097 | 0.163433451 | -3.830648463 | 0.000127806 | 0.000379126 |
| Castor2       | 106.3908885 | -0.62699469  | 0.366008201 | -1.713061862 | 0.086701159 | 0.136631666 |
| Kdm1a         | 478.5676249 | -0.627428085 | 0.1392887   | -4.504515333 | 6.65E-06    | 2.41E-05    |
| 4932415D10Rik | 0.674673109 | -0.62769796  | 2.415751369 | -0.259835498 | 0.794990668 | NA          |
| Pidd1         | 90.2439596  | -0.627823069 | 0.304388205 | -2.062573573 | 0.039153161 | 0.068131375 |
| Adora2a       | 34.78166276 | -0.627877111 | 0.540897877 | -1.16080528  | 0.245721095 | 0.329561264 |
| Snx1          | 525.7115764 | -0.627879215 | 0.154201788 | -4.071802419 | 4.67E-05    | 0.000148543 |
| P4ha1         | 266.5656907 | -0.628170118 | 0.185274381 | -3.390485592 | 0.000697689 | 0.001810657 |
| Gm5466        | 2.299321061 | -0.62965597  | 1.493310256 | -0.421651139 | 0.673279674 | 0.745184177 |
| Wnk1          | 1968.728417 | -0.629785388 | 0.121116948 | -5.199812217 | 1.99E-07    | 8.88E-07    |
| Mpp3          | 19.15988337 | -0.630707821 | 0.508142267 | -1.241203225 | 0.214530684 | 0.294209564 |

|            |             |              |             |              |             |             |
|------------|-------------|--------------|-------------|--------------|-------------|-------------|
| Cad        | 356.0339322 | -0.63139582  | 0.232400481 | -2.716843859 | 0.006590769 | 0.013957694 |
| Gramd1a    | 664.9410327 | -0.631410728 | 0.183428808 | -3.442265887 | 0.000576863 | 0.001525416 |
| Nup188     | 330.4307567 | -0.631587971 | 0.190409761 | -3.316993663 | 0.000909917 | 0.002314572 |
| Tmtc4      | 118.5472142 | -0.631597573 | 0.297969755 | -2.119670072 | 0.034033879 | 0.060156512 |
| Fuca2      | 308.1919493 | -0.63178091  | 0.19478008  | -3.24356018  | 0.001180459 | 0.002937449 |
| Pja2       | 610.2489396 | -0.631821222 | 0.16373536  | -3.858795204 | 0.000113947 | 0.000341282 |
| Sult1e1    | 2.503271177 | -0.631907731 | 1.64705947  | -0.383658115 | 0.701231861 | 0.768982424 |
| Rpl22l1    | 992.4854967 | -0.63240635  | 0.223050536 | -2.835260388 | 0.004578835 | 0.010039868 |
| Olfir916   | 0.203973251 | -0.632440936 | 3.637650325 | -0.173859739 | 0.861975694 | NA          |
| Cyp2a21-ps | 1.668277702 | -0.632685044 | 1.492052962 | -0.424036586 | 0.671539132 | 0.743692291 |
| Hdac4      | 218.817079  | -0.632982226 | 0.308532621 | -2.051589306 | 0.040209592 | 0.06974874  |
| Aig1       | 291.4278133 | -0.633258825 | 0.197447915 | -3.20721961  | 0.001340246 | 0.00329836  |
| Gm3558     | 0.605887762 | -0.634049438 | 3.539013754 | -0.179159925 | 0.85781213  | NA          |
| Socs6      | 382.7435379 | -0.634229841 | 0.186977222 | -3.3920166   | 0.000693802 | 0.001802215 |
| Msantd1    | 10.40473938 | -0.635001754 | 0.645543767 | -0.98366956  | 0.325278011 | 0.416723494 |
| Slc25a12   | 295.0482085 | -0.635118732 | 0.24774572  | -2.56359114  | 0.01035955  | 0.020965053 |
| Coro2b     | 49.48379963 | -0.63520717  | 0.3633605   | -1.748145904 | 0.080438766 | 0.127814343 |
| Tiam1      | 30.09516023 | -0.635767579 | 0.436177501 | -1.457589118 | 0.144953831 | 0.211536801 |
| Jade3      | 99.96098316 | -0.636439795 | 0.241734974 | -2.63279981  | 0.008468425 | 0.017514218 |
| Glb1l      | 106.2195315 | -0.637010201 | 0.363604734 | -1.751930439 | 0.07978577  | 0.126895028 |
| Gm6351     | 0.229763653 | -0.63734528  | 3.629677606 | -0.175592807 | 0.860613854 | NA          |
| Gm7982     | 0.229763653 | -0.63734528  | 3.629677606 | -0.175592807 | 0.860613854 | NA          |
| Yipf7      | 0.304456978 | -0.637496027 | 3.629684376 | -0.175634011 | 0.860581481 | NA          |
| Hgf        | 61.92110764 | -0.637780475 | 0.455397791 | -1.40049093  | 0.161366358 | 0.231457568 |
| Sae1       | 552.026579  | -0.638298235 | 0.211866022 | -3.012744699 | 0.002588966 | 0.005978086 |
| Ghrl       | 1.025347094 | -0.638915233 | 1.787011457 | -0.357532813 | 0.720692966 | NA          |
| Nudt5      | 488.2242447 | -0.639239098 | 0.218805891 | -2.921489428 | 0.003483621 | 0.00783493  |
| Ocstamp    | 28.63468885 | -0.639971093 | 0.647020946 | -0.989104135 | 0.322612195 | 0.41393036  |
| Arfgef1    | 1444.282147 | -0.640363734 | 0.183030707 | -3.498668302 | 0.000467588 | 0.001255938 |
| Zfp689     | 48.87379755 | -0.641242954 | 0.329109462 | -1.948418467 | 0.051364912 | 0.086426078 |
| Nat8b-ps   | 0.660091181 | -0.641568694 | 2.526464949 | -0.253939282 | 0.799542467 | NA          |
| Fam110b    | 12.10639158 | -0.641709361 | 0.671718903 | -0.955324255 | 0.339413745 | 0.431743514 |
| Zfp346     | 160.3169127 | -0.641760854 | 0.195818261 | -3.27732895  | 0.001047942 | 0.002629573 |
| Cbx7       | 337.6390134 | -0.642170512 | 0.3507232   | -1.830989542 | 0.067102104 | 0.109031326 |
| Fzd9       | 2.286060989 | -0.642230628 | 1.262290989 | -0.508781758 | 0.610905207 | 0.691777614 |
| Eppk1      | 1146.973311 | -0.642242711 | 0.305801368 | -2.100195676 | 0.035711632 | 0.062718852 |
| Foxj2      | 324.1781261 | -0.642330022 | 0.171564578 | -3.743954785 | 0.000181146 | 0.000523953 |
| Cntnap1    | 54.97288465 | -0.642757649 | 0.571874221 | -1.123949332 | 0.261034521 | 0.346285621 |
| Gxytl1     | 290.0284973 | -0.642917189 | 0.18557784  | -3.464407115 | 0.000531402 | 0.001413313 |
| Tmem185b   | 285.1457339 | -0.643319474 | 0.166916309 | -3.854143912 | 0.000116135 | 0.000347042 |
| Tnks1bp1   | 1283.703812 | -0.644640559 | 0.212378582 | -3.035336965 | 0.002402671 | 0.005590382 |
| Gm15590    | 1.385030996 | -0.645336239 | 1.809005903 | -0.356735286 | 0.721289987 | NA          |
| Xkrx       | 8.77412145  | -0.645471986 | 0.827413297 | -0.780108307 | 0.435327127 | 0.526830188 |
| Sh2b2      | 68.4970513  | -0.645698528 | 0.475449613 | -1.358079827 | 0.174438356 | 0.24729746  |
| Ggt5       | 51.54458922 | -0.645731136 | 0.342445909 | -1.885644183 | 0.059342919 | 0.097841208 |
| Zc3h12a    | 118.2680827 | -0.646397581 | 0.206933269 | -3.123700618 | 0.001785921 | 0.004268383 |
| Kdm4b      | 402.6237307 | -0.646815587 | 0.32364475  | -1.998535701 | 0.045658613 | 0.078018246 |
| Xpo5       | 381.4769388 | -0.646990609 | 0.191399457 | -3.380315795 | 0.000724026 | 0.001874156 |
| Zxdb       | 90.6818802  | -0.64723412  | 0.263685333 | -2.454570042 | 0.014105318 | 0.027548112 |
| Hoxb2      | 19.34173036 | -0.647548672 | 0.479313651 | -1.350991506 | 0.176698154 | 0.250029061 |
| Ammecr1    | 76.62138696 | -0.648505885 | 0.280301358 | -2.313602364 | 0.020689544 | 0.038725883 |
| Ms4a5      | 1.104917781 | -0.64883318  | 2.125843897 | -0.305212053 | 0.760204653 | NA          |
| Kcnq2      | 4.42906241  | -0.64886922  | 1.186533805 | -0.546861132 | 0.58447414  | 0.667567677 |
| Fmo4       | 330.6811596 | -0.649140525 | 0.204662701 | -3.17175783  | 0.001515193 | 0.003677012 |
| Sds1       | 369.197839  | -0.649216412 | 0.358911788 | -1.808846726 | 0.070474819 | 0.113784895 |
| Rbms2      | 288.3138691 | -0.649252475 | 0.289073302 | -2.245978681 | 0.024705373 | 0.045341501 |
| Ctsc       | 1760.088249 | -0.649296059 | 0.247474176 | -2.623692172 | 0.008698236 | 0.017919943 |
| Btbd17     | 0.335868781 | -0.649510729 | 3.630186625 | -0.178919377 | 0.858001008 | NA          |
| Jak2       | 410.3381674 | -0.649615102 | 0.18972037  | -3.424066182 | 0.000616916 | 0.001621271 |
| Trbj1-4    | 0.212971017 | -0.651410431 | 3.638626004 | -0.179026487 | 0.857916904 | NA          |
| Pigh       | 144.6810982 | -0.651533951 | 0.274153346 | -2.376531089 | 0.017476289 | 0.033341989 |
| Cog3       | 406.5264777 | -0.65157101  | 0.251784009 | -2.58781728  | 0.00965862  | 0.019672659 |
| Cdc73      | 432.0804834 | -0.651666023 | 0.224203253 | -2.906585936 | 0.003653965 | 0.00818565  |
| Crx        | 3.669633246 | -0.652007683 | 0.98802268  | -0.659911656 | 0.509310524 | 0.598767382 |
| Kcnc1      | 2.885648622 | -0.65214014  | 1.208726796 | -0.539526502 | 0.589523615 | 0.672389014 |
| Pkd1       | 806.329103  | -0.652190684 | 0.238454249 | -2.735076801 | 0.006236572 | 0.013265263 |

|         |             |              |             |              |             |             |
|---------|-------------|--------------|-------------|--------------|-------------|-------------|
| Tbc1d25 | 146.2886024 | -0.652338193 | 0.259022581 | -2.518460711 | 0.011786903 | 0.023515872 |
| Fam120b | 474.6235882 | -0.652387175 | 0.19884577  | -3.280870264 | 0.001034873 | 0.002600224 |
| Mfsd6   | 318.9637549 | -0.652393285 | 0.22392379  | -2.913461245 | 0.003574462 | 0.008018083 |
| Gm5851  | 2.298049145 | -0.65242044  | 1.411263323 | -0.462295328 | 0.64386955  | 0.720349658 |
| Gm15793 | 14.03078324 | -0.652497054 | 0.574784386 | -1.135203165 | 0.256290204 | 0.341215863 |
| Plekhn2 | 399.0649835 | -0.652562781 | 0.142112154 | -4.591885802 | 4.39E-06    | 1.63E-05    |
| Rhox5   | 8.500198502 | -0.652840991 | 0.823948993 | -0.792331802 | 0.428167233 | 0.520011041 |
| Mthfd2l | 86.35763845 | -0.653120768 | 0.379613096 | -1.720490612 | 0.085343299 | 0.13474093  |
| Gstm2   | 2393.282492 | -0.653145044 | 0.402695634 | -1.621932271 | 0.104817851 | 0.160652227 |
| Dnmt3b  | 84.01304566 | -0.653217844 | 0.359460373 | -1.817217958 | 0.069183746 | 0.112033071 |
| Olfr380 | 1.288654913 | -0.6532565   | 1.938383542 | -0.337010961 | 0.736108638 | NA          |
| Gcc1    | 377.9727597 | -0.653333466 | 0.23628121  | -2.765067379 | 0.005691104 | 0.01223017  |
| Mycbpap | 7.858253913 | -0.653943318 | 0.792864684 | -0.824785529 | 0.409493364 | 0.501908323 |
| Lyn     | 747.9933054 | -0.653966426 | 0.224652933 | -2.911007739 | 0.003602651 | 0.008078126 |
| Irf7    | 840.333124  | -0.654106381 | 0.301392075 | -2.170283941 | 0.029985342 | 0.053752904 |
| Cdh16   | 2.859004871 | -0.654348591 | 1.158031576 | -0.56505246  | 0.572038083 | 0.656177179 |
| Rbms1   | 1201.379395 | -0.654736787 | 0.186090065 | -3.518386581 | 0.000434179 | 0.001173041 |
| Plvap   | 770.8464631 | -0.655192785 | 0.272494191 | -2.404428453 | 0.016197777 | 0.031174045 |
| Nlrc4   | 30.6033183  | -0.655413591 | 0.360646653 | -1.817328917 | 0.069166765 | 0.112023086 |
| Prki    | 496.7782001 | -0.655959691 | 0.228036662 | -2.87655364  | 0.004020439 | 0.008922213 |
| Ddr2    | 134.7292734 | -0.656134116 | 0.545952512 | -1.201815362 | 0.229435072 | 0.311641233 |
| Inpp5a  | 342.3520077 | -0.656564863 | 0.215477646 | -3.047020763 | 0.002311217 | 0.005394528 |
| Gar1    | 157.9987827 | -0.656758863 | 0.214642553 | -3.059779403 | 0.002215001 | 0.005193417 |
| Nhlrc2  | 334.6902908 | -0.656805177 | 0.210107315 | -3.126046212 | 0.001771737 | 0.004238049 |
| Fbf1    | 367.9821999 | -0.657501326 | 0.265731687 | -2.474305318 | 0.013349556 | 0.026225736 |
| Spef1   | 43.44823684 | -0.65758542  | 0.424425432 | -1.549354424 | 0.121296543 | 0.181998193 |
| Gm19684 | 3.525072996 | -0.658150773 | 1.051060523 | -0.626177806 | 0.531198323 | 0.618908489 |
| Rom1    | 53.84787194 | -0.658397613 | 0.345406664 | -1.906152026 | 0.056630484 | 0.093914056 |
| Arf3    | 1408.351399 | -0.658402875 | 0.131189287 | -5.018724398 | 5.20E-07    | 2.18E-06    |
| Stk4    | 529.2773282 | -0.658408178 | 0.245248507 | -2.684657229 | 0.007260422 | 0.015230181 |
| Anxa9   | 54.71589659 | -0.658536965 | 0.347793884 | -1.893469079 | 0.058295517 | 0.096375288 |
| Tdp1    | 112.8249815 | -0.659513098 | 0.268751351 | -2.453989891 | 0.014128095 | 0.027589435 |
| Dgcr8   | 331.5136701 | -0.659649041 | 0.229858934 | -2.869799441 | 0.004107322 | 0.009105544 |
| Fam83h  | 499.7740658 | -0.660308626 | 0.198694022 | -3.323243545 | 0.000889772 | 0.002269085 |
| Ada     | 26.2376413  | -0.660379237 | 0.553012949 | -1.194147873 | 0.232420129 | 0.314993113 |
| Ppp2r1a | 1745.027701 | -0.660470496 | 0.120601695 | -5.476461127 | 4.34E-08    | 2.08E-07    |
| Ndrp4   | 11.62707818 | -0.660480317 | 0.813071277 | -0.812327696 | 0.416603622 | 0.508568174 |
| Tapbp   | 1960.938372 | -0.660555224 | 0.127806407 | -5.1684046   | 2.36E-07    | 1.04E-06    |
| Fam118b | 155.2270518 | -0.660631924 | 0.256307134 | -2.577501119 | 0.009951756 | 0.020209355 |
| Rnf44   | 1352.389468 | -0.661520672 | 0.206282215 | -3.206872063 | 0.001341867 | 0.003301031 |
| Arl8a   | 522.1848527 | -0.661536917 | 0.160413677 | -4.123943344 | 3.72E-05    | 0.000120413 |
| Ptk2    | 549.1196651 | -0.661587731 | 0.215300559 | -3.072856534 | 0.002120204 | 0.004989679 |
| Hnrnp1  | 776.1744427 | -0.661646186 | 0.202494801 | -3.267472468 | 0.001085124 | 0.002717273 |
| Rnf38   | 521.5201756 | -0.661784129 | 0.243011842 | -2.723258768 | 0.00646414  | 0.013708256 |
| Sh3gl1  | 751.7068249 | -0.662265587 | 0.194078004 | -3.412368085 | 0.000644011 | 0.001686497 |
| Ankrd28 | 722.0728922 | -0.662622281 | 0.161302148 | -4.107956958 | 3.99E-05    | 0.000128496 |
| Gm10293 | 2.257636806 | -0.662909701 | 1.426987523 | -0.464451855 | 0.642252417 | 0.719106738 |
| Fam13b  | 442.6351414 | -0.663074972 | 0.17176062  | -3.860459813 | 0.000113174 | 0.000339084 |
| Morn4   | 22.77672414 | -0.663246262 | 0.492454312 | -1.346817858 | 0.178038902 | 0.251675555 |
| Lepr    | 48.1958567  | -0.664114183 | 0.504307309 | -1.316883914 | 0.187877539 | 0.263269463 |
| Snta1   | 505.2822643 | -0.664607036 | 0.276811771 | -2.400934881 | 0.016353246 | 0.031434225 |
| Hoxb3   | 19.81319871 | -0.665028036 | 0.491422353 | -1.35327185  | 0.175968799 | 0.249141773 |
| Klhl30  | 1.148277275 | -0.665080301 | 1.897077234 | -0.350581563 | 0.725902291 | NA          |
| Fgf2    | 27.54110242 | -0.665259236 | 0.704826564 | -0.94386232  | 0.345240009 | 0.43752986  |
| Rap1b   | 1150.913627 | -0.665824492 | 0.196645724 | -3.385908827 | 0.000709429 | 0.001839166 |
| Gm49393 | 0.752747743 | -0.666079303 | 2.823433561 | -0.235911095 | 0.813501659 | NA          |
| Ttyh1   | 20.27612031 | -0.666082555 | 0.52328123  | -1.272895942 | 0.203054969 | 0.280935004 |
| Srxn1   | 980.2505246 | -0.666089874 | 0.393640885 | -1.69212574  | 0.090622002 | 0.142101167 |
| Gtf3c4  | 462.3901575 | -0.666223581 | 0.220038319 | -3.027761642 | 0.002463723 | 0.005716053 |
| Zfp212  | 218.2435509 | -0.666568247 | 0.185532617 | -3.59272811  | 0.000327234 | 0.000903284 |
| Adprh   | 67.04114364 | -0.666866574 | 0.376550417 | -1.770988809 | 0.076562563 | 0.122419675 |
| Eif4e3  | 194.0633236 | -0.666991108 | 0.199311654 | -3.346473197 | 0.000818466 | 0.002098227 |
| Ndc1    | 120.0316448 | -0.667065467 | 0.350535823 | -1.902988006 | 0.05704211  | 0.094541503 |
| Tceanc  | 227.191676  | -0.667229383 | 0.211656732 | -3.152412763 | 0.001619272 | 0.003908999 |
| Tyro3   | 65.4054698  | -0.667584637 | 0.494521667 | -1.349960338 | 0.177028705 | 0.250392879 |
|         | 15.26427458 | -0.668116301 | 0.721827734 | -0.925589679 | 0.354652959 | 0.447107228 |



|               |             |              |             |              |             |             |
|---------------|-------------|--------------|-------------|--------------|-------------|-------------|
| Rnf144a       | 60.78839303 | -0.66812467  | 0.314799234 | -2.122383402 | 0.033805555 | 0.05977773  |
| Tlr12         | 138.8841913 | -0.668125194 | 0.379737333 | -1.759440369 | 0.07850274  | 0.125216572 |
| Rrp1b         | 200.4956854 | -0.668249912 | 0.288218582 | -2.318552496 | 0.020419313 | 0.038283125 |
| 4930474N05Rik | 0.973517339 | -0.668487374 | 1.981665286 | -0.337336168 | 0.735863497 | NA          |
| Ctse          | 12.97903668 | -0.668492036 | 0.71214824  | -0.938697869 | 0.347885888 | 0.440341455 |
| Ccn1          | 2503.519189 | -0.669020396 | 0.476472504 | -1.404111234 | 0.160285729 | 0.230148329 |
| Mcrs1         | 278.0423134 | -0.669063908 | 0.234678341 | -2.850982775 | 0.004358433 | 0.009603783 |
| Olfr392       | 2.153540679 | -0.670200894 | 1.489719465 | -0.449883961 | 0.652794113 | 0.728040955 |
| Stk24         | 437.4037473 | -0.670204859 | 0.208433458 | -3.215437987 | 0.001302456 | 0.003215215 |
| Slc25a14      | 50.5797937  | -0.670833863 | 0.31464941  | -2.132004195 | 0.033006502 | 0.058583534 |
| Sf3b3         | 1030.752272 | -0.671065233 | 0.140511185 | -4.775884808 | 1.79E-06    | 6.97E-06    |
| Ssh2          | 512.9027381 | -0.671383143 | 0.192967948 | -3.479246947 | 0.000502825 | 0.001343599 |
| Mthfr         | 333.2626178 | -0.671729683 | 0.213695767 | -3.14339255  | 0.001670017 | 0.004016712 |
| AL646044.2    | 3.988210519 | -0.671902779 | 1.190578561 | -0.564349805 | 0.572516092 | 0.656592959 |
| Katnal1       | 146.4713597 | -0.671907229 | 0.263067615 | -2.554123695 | 0.010645543 | 0.021462301 |
| Chrn4         | 1.169575191 | -0.671920532 | 1.836685312 | -0.365833237 | 0.714489517 | NA          |
| B4galt3       | 369.5480726 | -0.672370973 | 0.222836094 | -3.017334219 | 0.002550085 | 0.005897158 |
| Hmces         | 297.2981085 | -0.672458278 | 0.2153904   | -3.122043871 | 0.001796002 | 0.004287068 |
| CR974586.1    | 2.70752135  | -0.672467619 | 1.614081057 | -0.416625681 | 0.676952222 | 0.748325865 |
| Ngef          | 785.8535151 | -0.6724292   | 0.249000085 | -2.700770164 | 0.006917913 | 0.014572665 |
| Cep19         | 93.51052434 | -0.67266177  | 0.289534235 | -2.323254694 | 0.020165474 | 0.037853482 |
| Syt8          | 0.80625706  | -0.672750164 | 2.308659452 | -0.291402945 | 0.770743162 | NA          |
| Polr1a        | 667.3186155 | -0.673998588 | 0.206418171 | -3.265209567 | 0.001093831 | 0.002737468 |
| Megf6         | 30.57744273 | -0.674960618 | 0.574207277 | -1.175465106 | 0.239808689 | 0.323233597 |
| Rcc2          | 889.442227  | -0.675871126 | 0.174675814 | -3.869288542 | 0.000109153 | 0.000327787 |
| Pfk1          | 779.8060189 | -0.675918793 | 0.217979642 | -3.1008345   | 0.001929761 | 0.004575601 |
| Mrpl23        | 108.7975649 | -0.675985063 | 0.328680095 | -2.056665652 | 0.039718398 | 0.068995237 |
| Abtb2         | 407.7463195 | -0.676945974 | 0.236006742 | -2.868333207 | 0.004126407 | 0.009141909 |
| Galnt17       | 21.16590416 | -0.677064617 | 0.659382896 | -1.026815559 | 0.304507322 | 0.394591123 |
| Pip4p2        | 336.5781839 | -0.677204623 | 0.233984593 | -2.894227415 | 0.003800928 | 0.008482552 |
| Arm7          | 75.87216247 | -0.677294594 | 0.25778658  | -2.627346211 | 0.008605373 | 0.017750079 |
| Il18bp        | 167.7826254 | -0.6775759   | 0.339781241 | -1.99415335  | 0.046135298 | 0.078753837 |
| Smim17        | 3.576902313 | -0.677764912 | 1.679102443 | -0.403647148 | 0.68647221  | 0.756788556 |
| Rps16-ps2     | 2823.324835 | -0.678054937 | 0.191037889 | -3.549321764 | 0.000386225 | 0.001053161 |
| Npl           | 28.22362073 | -0.67914076  | 0.430564822 | -1.57732524  | 0.114720708 | 0.173752543 |
| Atxn10        | 1610.656485 | -0.679270022 | 0.142034501 | -4.782429738 | 1.73E-06    | 6.76E-06    |
| Cyp2c55       | 325.4880401 | -0.679998478 | 0.922482715 | -0.737139533 | 0.4610375   | 0.551485216 |
| Mdfic         | 648.3884827 | -0.680657116 | 0.203097389 | -3.351382903 | 0.00080409  | 0.002063856 |
| Tll13         | 14.48428569 | -0.68094918  | 0.622893494 | -1.093203231 | 0.274304579 | 0.36114836  |
| Recql         | 172.9070144 | -0.680981354 | 0.267485148 | -2.54586604  | 0.010900701 | 0.021932628 |
| Slc38a8       | 2.340274491 | -0.681152759 | 1.298024999 | -0.524760894 | 0.59974942  | 0.68188661  |
| Ntng2         | 49.78993262 | -0.681404581 | 0.333591775 | -2.042630038 | 0.041089075 | 0.071072094 |
| Arntl         | 252.4883328 | -0.681847116 | 0.297096373 | -2.295036821 | 0.021731014 | 0.040470869 |
| Camkmt        | 24.30918665 | -0.681965027 | 0.509604895 | -1.338223069 | 0.180823731 | 0.254823132 |
| Mtbp          | 86.32493896 | -0.682564264 | 0.344351667 | -1.98217209  | 0.047459983 | 0.080708009 |
| Bicra         | 289.3901649 | -0.682600913 | 0.219969557 | -3.103160832 | 0.001914656 | 0.004542943 |
| Ank3          | 734.0756777 | -0.683960047 | 0.224616668 | -3.045012097 | 0.00232671  | 0.005428458 |
| Chsy3         | 53.30358463 | -0.684036533 | 0.36232854  | -1.887890294 | 0.05904068  | 0.097446559 |
| Ccdc8         | 39.70642667 | -0.684201986 | 0.334532633 | -2.045247366 | 0.040830477 | 0.070660641 |
| Ywhaz         | 3614.737219 | -0.684249267 | 0.18198939  | -3.75983054  | 0.000170028 | 0.000494987 |
| Cdkn2aipnl    | 330.9284591 | -0.684312921 | 0.194254551 | -3.522763901 | 0.000427072 | 0.001155486 |
| Btdb10        | 80.2816655  | -0.68449554  | 0.294894529 | -2.32115374  | 0.020278548 | 0.038048501 |
| Dhx35         | 175.3968115 | -0.684886118 | 0.208435092 | -3.285848427 | 0.001016757 | 0.002560365 |
| Zfp688        | 140.1725707 | -0.684950816 | 0.304763317 | -2.247484455 | 0.024609083 | 0.045198841 |
| Astn1         | 1.804667661 | -0.685091278 | 1.700873634 | -0.402787876 | 0.687104281 | 0.757387417 |
| Celf4         | 19.33339849 | -0.685294496 | 0.525291696 | -1.304598001 | 0.192029769 | 0.268071207 |
| Zfp719        | 78.69120149 | -0.685880319 | 0.307494407 | -2.230545669 | 0.025711239 | 0.046927351 |
| Fam186b       | 1.77068139  | -0.685986716 | 1.808767805 | -0.379256372 | 0.704497494 | 0.77112509  |
| Zfp248        | 56.03680027 | -0.686194465 | 0.496347366 | -1.382488379 | 0.166821796 | 0.238009706 |
| Lmtd2         | 110.5564614 | -0.686360928 | 0.332916614 | -2.061660184 | 0.0392401   | 0.068268724 |
| Pkhd1l1       | 23.31582174 | -0.68661128  | 0.996240875 | -0.689202077 | 0.49069611  | 0.580607113 |
| Gm49366       | 0.751062377 | -0.687318942 | 3.417750788 | -0.201102709 | 0.840618264 | NA          |
| Klhl11        | 15.26210163 | -0.687840254 | 0.598070749 | -1.15009847  | 0.250103317 | 0.334491358 |
| Gm8186        | 169.9543339 | -0.688453319 | 0.227135957 | -3.031018636 | 0.002437302 | 0.00566302  |
| Zfyve16       | 181.5368282 | -0.688837882 | 0.226866213 | -3.036317633 | 0.002394869 | 0.005574513 |
| Atp6v1a       | 813.0325674 | -0.689380861 | 0.135046661 | -5.104760503 | 3.31E-07    | 1.42E-06    |

|               |             |              |             |              |             |             |
|---------------|-------------|--------------|-------------|--------------|-------------|-------------|
| N4bp1         | 456.8198915 | -0.689667071 | 0.154788738 | -4.455537798 | 8.37E-06    | 2.98E-05    |
| Taf1b         | 136.8640627 | -0.690096721 | 0.244918253 | -2.817661458 | 0.004837479 | 0.0105473   |
| Sall4         | 9.073569581 | -0.690916811 | 1.030842228 | -0.670244963 | 0.502701645 | 0.592141066 |
| Sat1          | 1803.443081 | -0.691226963 | 0.195771028 | -3.530792931 | 0.000414316 | 0.001123649 |
| Unc45a        | 403.0991576 | -0.692122124 | 0.216522332 | -3.196539207 | 0.001390869 | 0.003410735 |
| Eef1b2        | 4552.654488 | -0.692978673 | 0.173756242 | -3.988223176 | 6.66E-05    | 0.00020702  |
| Olfr1356      | 1.851935773 | -0.693052628 | 1.401242092 | -0.494598779 | 0.620883364 | 0.700285782 |
| Nat8f3        | 10.59501239 | -0.693871384 | 0.979831459 | -0.708153813 | 0.478849745 | 0.569157809 |
| Tspan14       | 676.8474988 | -0.693923549 | 0.177142719 | -3.917313402 | 8.95E-05    | 0.000273028 |
| Anapc5        | 2077.553333 | -0.694232654 | 0.166078801 | -4.18014008  | 2.91E-05    | 9.58E-05    |
| Gxylt2        | 21.53777922 | -0.694560824 | 0.783994225 | -0.885925944 | 0.375657435 | 0.467695147 |
| Trp53bp1      | 386.5684324 | -0.694639886 | 0.186655657 | -3.721504604 | 0.000198039 | 0.000569338 |
| Cp            | 37106.88141 | -0.694991432 | 0.173146227 | -4.013898791 | 5.97E-05    | 0.00018689  |
| Zfp423        | 15.08111173 | -0.69501952  | 0.598538289 | -1.161194752 | 0.245562709 | 0.329385705 |
| Spcs1         | 1183.359135 | -0.695340017 | 0.190492981 | -3.650213316 | 0.000262023 | 0.000736692 |
| Gnb1          | 1788.823874 | -0.695565031 | 0.197738537 | -3.517599769 | 0.000435469 | 0.001175593 |
| Rps13-ps2     | 489.327075  | -0.695700374 | 0.230700984 | -3.015593433 | 0.002564769 | 0.005927095 |
| Pla2g15       | 336.9177793 | -0.696253878 | 0.165452362 | -4.208183355 | 2.57E-05    | 8.53E-05    |
| Map4          | 1103.324486 | -0.696265055 | 0.220887666 | -3.15212283  | 0.001620881 | 0.003912328 |
| Cyp20a1       | 276.6635977 | -0.696386154 | 0.238000741 | -2.925983128 | 0.00343696  | 0.007736677 |
| 2700049A03Rik | 90.68226775 | -0.696856787 | 0.277709355 | -2.509302531 | 0.012096983 | 0.024038858 |
| Gna13         | 639.2057765 | -0.697367463 | 0.205634944 | -3.391288714 | 0.000695648 | 0.001805634 |
| Ssh3          | 461.1590393 | -0.697517192 | 0.211731604 | -3.294346135 | 0.000986509 | 0.002490819 |
| Lrrfp1        | 934.5511938 | -0.697660883 | 0.167231407 | -4.171829305 | 3.02E-05    | 9.90E-05    |
| Eomes         | 3.570565687 | -0.697675328 | 1.382584596 | -0.504616738 | 0.613828052 | 0.69433964  |
| Gtf2e2        | 212.3062003 | -0.697855352 | 0.203455499 | -3.430014691 | 0.000603549 | 0.001587854 |
| Elp3          | 568.0939885 | -0.698034138 | 0.138769503 | -5.030169633 | 4.90E-07    | 2.06E-06    |
| Man1b1        | 845.1645086 | -0.698410813 | 0.185725086 | -3.760454926 | 0.000169605 | 0.000493922 |
| Adam17        | 470.0590194 | -0.698579147 | 0.199164832 | -3.507542677 | 0.000452266 | 0.001217276 |
| Rapgef6       | 483.9979831 | -0.699405638 | 0.261852788 | -2.670987933 | 0.007562837 | 0.01580427  |
| Gm20778       | 0.625706806 | -0.699895486 | 2.899955553 | -0.24134697  | 0.80928621  | NA          |
| Garem1        | 404.929926  | -0.700017814 | 0.258990595 | -2.702869627 | 0.00687437  | 0.014486312 |
| Natd1         | 145.0395998 | -0.700091401 | 0.313084795 | -2.23610796  | 0.0253447   | 0.046370085 |
| Kcnt2         | 47.25915415 | -0.700208135 | 0.499269642 | -1.402464871 | 0.160776474 | 0.230778189 |
| Ahdc1         | 405.8921258 | -0.700328824 | 0.201144613 | -3.481718029 | 0.000498208 | 0.001332724 |
| Snx15         | 389.5468445 | -0.700439158 | 0.19421283  | -3.606554509 | 0.00031029  | 0.000859434 |
| Olfr571       | 1.210159819 | -0.700514671 | 1.774923328 | -0.3946732   | 0.693084083 | NA          |
| Zfp575        | 1.678872404 | -0.700523372 | 1.791692545 | -0.390984142 | 0.695808958 | 0.764656884 |
| H2-T10        | 74.53737178 | -0.70057266  | 0.350688756 | -1.997704938 | 0.045748659 | 0.078164275 |
| Ttll11        | 7.462770389 | -0.700603202 | 0.875438672 | -0.800288157 | 0.423543863 | 0.515240172 |
| Tmem74b       | 0.737248918 | -0.700820198 | 2.354973197 | -0.297591581 | 0.766014901 | NA          |
| Lrrk1         | 414.5780656 | -0.700884484 | 0.165834218 | -4.226416548 | 2.37E-05    | 7.92E-05    |
| Tubb1         | 2.387609347 | -0.701725321 | 1.32635835  | -0.529061638 | 0.596762692 | 0.679327616 |
| Gnaq          | 449.3360508 | -0.701969177 | 0.207572072 | -3.381809359 | 0.000720101 | 0.001865129 |
| Morc3         | 470.1618424 | -0.702105933 | 0.143607092 | -4.889075622 | 1.01E-06    | 4.09E-06    |
| Gm49395       | 22.89721326 | -0.70220901  | 0.600167158 | -1.170022385 | 0.24199196  | 0.325687135 |
| Rpa1          | 553.4531508 | -0.702362384 | 0.232288148 | -3.023668622 | 0.002497298 | 0.005788435 |
| Casp3         | 608.3755531 | -0.703899908 | 0.250676519 | -2.808000973 | 0.004985008 | 0.010843998 |
| Nkx2-9        | 0.654819126 | -0.704017095 | 2.839483202 | -0.247938461 | 0.804182021 | NA          |
| Sptssa        | 1037.383555 | -0.704219147 | 0.246805946 | -2.853331367 | 0.004326348 | 0.009547649 |
| Wdr31         | 40.96868599 | -0.704628445 | 0.372879482 | -1.889694873 | 0.05879878  | 0.097075499 |
| Sdccag8       | 265.1885734 | -0.704710129 | 0.353990149 | -1.990761978 | 0.046507061 | 0.07927731  |
| Vmn1r53       | 1.164190332 | -0.705030505 | 2.53506767  | -0.278111118 | 0.780927061 | NA          |
| Pbx3          | 75.84175252 | -0.705157019 | 0.261433927 | -2.697266679 | 0.006991126 | 0.014719614 |
| Ccdc24        | 7.19809656  | -0.705461808 | 0.888885993 | -0.793647119 | 0.427400893 | 0.519413347 |
| Tmem158       | 12.39340049 | -0.705608916 | 0.569137383 | -1.239786628 | 0.215054326 | 0.294832822 |
| Cyfp1         | 895.7074977 | -0.705816863 | 0.208406809 | -3.386726496 | 0.000707319 | 0.001833972 |
| Litaf         | 1855.363293 | -0.705825471 | 0.129083951 | -5.467956831 | 4.55E-08    | 2.17E-07    |
| Proser2       | 584.7151945 | -0.706081787 | 0.312031391 | -2.262854981 | 0.02364463  | 0.043620134 |
| Gm11688       | 1.177550566 | -0.706514633 | 1.953130285 | -0.361734513 | 0.717550433 | NA          |
| Rnf213        | 1917.374635 | -0.706700678 | 0.21812851  | -3.239836361 | 0.001195983 | 0.002972175 |
| Zhx2          | 315.9186802 | -0.706739174 | 0.27953964  | -2.528225238 | 0.011464078 | 0.022971274 |
| Igsf23        | 15.05735856 | -0.706815699 | 0.847552502 | -0.833949163 | 0.404309632 | 0.497127342 |
| Hmga1         | 682.1453801 | -0.706839381 | 0.186123171 | -3.797696859 | 0.000146047 | 0.00042987  |
| Rpl30-ps1     | 0.668144132 | -0.707047361 | 2.490099594 | -0.283943406 | 0.776453751 | NA          |
| Phip          | 437.5382675 | -0.707287504 | 0.184631232 | -3.830811821 | 0.000127721 | 0.00037894  |



|               |             |              |             |              |             |             |
|---------------|-------------|--------------|-------------|--------------|-------------|-------------|
| Rere          | 847.2022814 | -0.707300767 | 0.168755024 | -4.191287167 | 2.77E-05    | 9.14E-05    |
| Fbp2          | 3.480077907 | -0.707997804 | 1.174378759 | -0.602870069 | 0.546595129 | 0.632916485 |
| Rexo4         | 512.2591114 | -0.70818184  | 0.217877872 | -3.250361474 | 0.001152584 | 0.002874379 |
| Siah1a        | 158.201347  | -0.708220766 | 0.225061668 | -3.146785386 | 0.001650761 | 0.003978817 |
| Ifi203        | 425.98273   | -0.708894161 | 0.350896592 | -2.020236664 | 0.043358845 | 0.074529299 |
| Tap1          | 641.7099631 | -0.709022166 | 0.307026973 | -2.309315558 | 0.020926077 | 0.039130208 |
| Prkaa1        | 369.2870628 | -0.709077201 | 0.183197018 | -3.870571745 | 0.00010858  | 0.000326296 |
| Clec11a       | 43.546247   | -0.70939601  | 0.371222677 | -1.910971643 | 0.056008225 | 0.093008788 |
| Klre1         | 7.83532019  | -0.709442482 | 0.926631899 | -0.765614137 | 0.44390593  | 0.535085081 |
| Chadl         | 32.61142436 | -0.710315794 | 0.5600516   | -1.268304194 | 0.20468934  | 0.282874827 |
| Snx24         | 339.6645362 | -0.71043906  | 0.190897505 | -3.721573313 | 0.000197985 | 0.000569279 |
| Atic          | 636.5907698 | -0.710443752 | 0.186891475 | -3.80137057  | 0.000143898 | 0.000423899 |
| Lzts1         | 11.23595679 | -0.710707    | 0.629170423 | -1.129593785 | 0.258647431 | 0.343663359 |
| Usp37         | 195.7334107 | -0.710733986 | 0.22099373  | -3.216082129 | 0.001299536 | 0.003209401 |
| Rnf145        | 417.7773254 | -0.710775718 | 0.209046736 | -3.400080442 | 0.00067366  | 0.001754172 |
| Lrrc8a        | 626.2576635 | -0.710892743 | 0.248043167 | -2.866004137 | 0.004156888 | 0.009203458 |
| Acbd3         | 542.5390993 | -0.710925765 | 0.139695805 | -5.089098879 | 3.60E-07    | 1.54E-06    |
| 9-Sep         | 1452.81879  | -0.711274357 | 0.142378409 | -4.995661642 | 5.86E-07    | 2.44E-06    |
| Rps12-ps3     | 6039.87712  | -0.711343872 | 0.168957802 | -4.210186604 | 2.55E-05    | 8.46E-05    |
| Gm17334       | 1.936535504 | -0.711622006 | 1.343624322 | -0.529628702 | 0.59636939  | 0.678970573 |
| Gm21994       | 17.04890067 | -0.713213675 | 0.571365999 | -1.248260617 | 0.211935632 | 0.291140417 |
| Zfp319        | 174.8774372 | -0.713433361 | 0.189525647 | -3.764310379 | 0.000167009 | 0.000486697 |
| Lmod1         | 9.95438127  | -0.713817027 | 0.794448295 | -0.898506589 | 0.368915534 | 0.461225581 |
| 7-Sep         | 1214.282328 | -0.714087921 | 0.211442713 | -3.377216989 | 0.000732233 | 0.001893674 |
| Ccnyl1        | 136.6490302 | -0.714213296 | 0.200868622 | -3.555624005 | 0.000377083 | 0.001038081 |
| Mgat1         | 1637.295702 | -0.714513462 | 0.152798919 | -4.676168303 | 2.92E-06    | 1.11E-05    |
| Mfsd12        | 274.4252277 | -0.714743714 | 0.19761961  | -3.616765121 | 0.000298308 | 0.000828806 |
| Pou4f1        | 3.43446468  | -0.71512972  | 1.207291916 | -0.59234201  | 0.55362159  | 0.638886178 |
| 4933424G06Rik | 0.225387884 | -0.715137554 | 3.634896285 | -0.196742217 | 0.844029271 | NA          |
| Uprt          | 26.18453958 | -0.715164515 | 0.443552574 | -1.612355686 | 0.106884562 | 0.163320607 |
| Ctr9          | 782.6719058 | -0.715196636 | 0.203422317 | -3.515821901 | 0.000438395 | 0.001182744 |
| Mgat4b        | 893.4737819 | -0.715547276 | 0.182582158 | -3.919042714 | 8.89E-05    | 0.000271222 |
| Gnpda2        | 115.4344268 | -0.716064943 | 0.306405614 | -2.33698376  | 0.019440029 | 0.036656742 |
| Slc2a1        | 390.2247678 | -0.717212223 | 0.228900314 | -3.133295065 | 0.001728556 | 0.004142314 |
| Olfr487       | 0.667745181 | -0.717742951 | 2.454609216 | -0.292406199 | 0.769976069 | NA          |
| Rps6ka1       | 332.6094519 | -0.718070976 | 0.179619979 | -3.997723299 | 6.40E-05    | 0.000199287 |
| Ptprj         | 1399.071837 | -0.718250953 | 0.199254622 | -3.604689047 | 0.000312527 | 0.000865069 |
| Klhl33        | 16.29820799 | -0.718445404 | 0.524856156 | -1.368842483 | 0.171048518 | 0.243104221 |
| Kcp           | 433.4436845 | -0.718672102 | 0.713408449 | -1.007378176 | 0.313753075 | 0.404879451 |
| Gm8337        | 1.38875034  | -0.71883742  | 1.563763429 | -0.459684251 | 0.645742876 | NA          |
| Trim24        | 560.4298004 | -0.71898121  | 0.166953679 | -4.306471187 | 1.66E-05    | 5.66E-05    |
| 1700029J07Rik | 36.69564171 | -0.718999763 | 0.470846607 | -1.527036094 | 0.126752036 | 0.188837605 |
| Zbtb8a        | 81.10684081 | -0.719084083 | 0.248556031 | -2.89304621  | 0.003815252 | 0.00851229  |
| Khdrbs1       | 895.6768555 | -0.720169143 | 0.170097    | -4.233873286 | 2.30E-05    | 7.68E-05    |
| Mxd1          | 199.273907  | -0.720281373 | 0.184970642 | -3.894030787 | 9.86E-05    | 0.000298543 |
| Prrt4         | 0.738339171 | -0.720382663 | 2.108436528 | -0.341666753 | 0.732601695 | NA          |
| Bend4         | 8.247416397 | -0.720439017 | 0.707441968 | -1.018371894 | 0.308501254 | 0.399099209 |
| Pip5k1c       | 831.0408936 | -0.72045254  | 0.163948086 | -4.394394322 | 1.11E-05    | 3.89E-05    |
| Hoxd4         | 0.65598152  | -0.721552809 | 2.488628367 | -0.28993996  | 0.77186217  | NA          |
| Lsm3          | 168.6001887 | -0.721615012 | 0.241064565 | -2.993451206 | 0.002758416 | 0.006334251 |
| Fam89b        | 286.1859863 | -0.721672149 | 0.184093872 | -3.920131302 | 8.85E-05    | 0.000270145 |
| Fkbp3         | 573.763713  | -0.721930765 | 0.147317123 | -4.900521736 | 9.56E-07    | 3.87E-06    |
| Gm45799       | 88.94897395 | -0.722335298 | 0.463197501 | -1.559454223 | 0.118888911 | 0.178984295 |
| Rpap3         | 241.3529401 | -0.723025238 | 0.208642776 | -3.465373938 | 0.000529495 | 0.001408681 |
| Fam221a       | 20.87496915 | -0.723081072 | 0.529322305 | -1.366050638 | 0.17192307  | 0.244225023 |
| Pkig          | 397.7335339 | -0.723173834 | 0.166859975 | -4.334016195 | 1.46E-05    | 5.04E-05    |
| Psd2          | 2.706126344 | -0.723208682 | 1.695104251 | -0.426645548 | 0.669637517 | 0.742309668 |
| Gm8839        | 0.744563555 | -0.723220369 | 2.352815505 | -0.307385075 | 0.758550287 | NA          |
| Bbs5          | 66.23912889 | -0.723514227 | 0.269046861 | -2.689175494 | 0.007162875 | 0.01505334  |
| Edn1          | 19.22836893 | -0.723791609 | 0.569425674 | -1.271090577 | 0.203696427 | 0.281685325 |
| Ccdc71l       | 119.3269572 | -0.724063027 | 0.244912176 | -2.956419065 | 0.003112339 | 0.007078329 |
| Gm6480        | 1.80335388  | -0.724163369 | 1.649226963 | -0.439092608 | 0.660594435 | 0.734865509 |
| Nbea          | 90.50570412 | -0.724258045 | 0.231048179 | -3.134662425 | 0.00172052  | 0.004126536 |
| Rps19         | 4243.000755 | -0.724674615 | 0.152467725 | -4.752970602 | 2.00E-06    | 7.75E-06    |
| Kcnk1         | 31.36990041 | -0.724714259 | 0.609206565 | -1.189603496 | 0.234202271 | 0.316980019 |
| Snx5          | 1331.49317  | -0.724765793 | 0.12891103  | -5.622217087 | 1.89E-08    | 9.45E-08    |

|               |             |              |             |              |             |             |
|---------------|-------------|--------------|-------------|--------------|-------------|-------------|
| Irx3          | 23.20615955 | -0.725222377 | 0.560316801 | -1.294307748 | 0.195559141 | 0.272154469 |
| Gm10443       | 681.8181279 | -0.725451488 | 0.193171346 | -3.755481879 | 0.000173008 | 0.000503147 |
| Gm10130       | 3.23335947  | -0.725592057 | 1.080796002 | -0.671349686 | 0.501997789 | 0.591434576 |
| Gm3508        | 1.423522421 | -0.725843439 | 1.776619726 | -0.408553068 | 0.682867678 | NA          |
| Rassf7        | 537.4664093 | -0.726025122 | 0.203801538 | -3.562412372 | 0.000367463 | 0.001006507 |
| Cep162        | 140.8361591 | -0.726445584 | 0.259686888 | -2.797390313 | 0.005151726 | 0.011169607 |
| Cnr2          | 40.88438734 | -0.726494813 | 0.364304503 | -1.99419663  | 0.04613057  | 0.078753651 |
| Siva1         | 154.8202656 | -0.72711508  | 0.209109936 | -3.477190481 | 0.000506698 | 0.001352251 |
| Snap25        | 0.742682252 | -0.72760143  | 2.367097518 | -0.307381265 | 0.758553186 | NA          |
| Slc48a1       | 1299.593789 | -0.727614826 | 0.265131259 | -2.744356995 | 0.006062956 | 0.012939569 |
| Tmem50b       | 187.7678317 | -0.727639993 | 0.208108851 | -3.496439428 | 0.000471512 | 0.00126548  |
| Urm1          | 316.1434532 | -0.729016087 | 0.169029218 | -4.312958992 | 1.61E-05    | 5.51E-05    |
| Wdr19         | 108.6404418 | -0.729136999 | 0.33329249  | -2.187679053 | 0.028692989 | 0.051746332 |
| Olfr1062      | 2.702253426 | -0.729167371 | 1.191680194 | -0.611881757 | 0.540615992 | 0.627479673 |
| Rsph4a        | 1.397342858 | -0.729181624 | 1.564857639 | -0.465973138 | 0.641234728 | NA          |
| Arhgap18      | 403.8954544 | -0.729719363 | 0.291973033 | -2.499269733 | 0.012444955 | 0.024672821 |
| Atp13a2       | 549.178428  | -0.729831775 | 0.151997046 | -4.801618155 | 1.57E-06    | 6.17E-06    |
| Kat7          | 524.147583  | -0.730400883 | 0.160114276 | -4.56174741  | 5.07E-06    | 1.87E-05    |
| Flywch2       | 31.08981219 | -0.730720535 | 0.406362849 | -1.798197196 | 0.072145764 | 0.116185621 |
| Gm10020       | 19.85406809 | -0.730752689 | 0.643010425 | -1.136455429 | 0.255766009 | 0.340730961 |
| Mast4         | 121.8723074 | -0.730951233 | 0.240348911 | -3.041208844 | 0.002356303 | 0.005492993 |
| Rpia          | 138.146204  | -0.731277248 | 0.237433891 | -3.079919401 | 0.002070566 | 0.004880273 |
| Npc2          | 1645.096764 | -0.73141724  | 0.156882618 | -4.662194243 | 3.13E-06    | 1.18E-05    |
| Tbl1x         | 1144.816005 | -0.731426605 | 0.201908194 | -3.622570194 | 0.00029169  | 0.00081214  |
| Twist1        | 10.21718771 | -0.731573384 | 0.62834657  | -1.164283245 | 0.244309244 | 0.327951496 |
| Sec61a2       | 257.7908822 | -0.731945329 | 0.237235214 | -3.085314853 | 0.002033368 | 0.004799232 |
| Erc1          | 124.0296173 | -0.73202466  | 0.284964245 | -2.568829856 | 0.010204255 | 0.020692534 |
| Mrgpre        | 58.83075186 | -0.73220042  | 0.399670262 | -1.832011259 | 0.066949743 | 0.108804502 |
| Pms2          | 75.1527859  | -0.732769244 | 0.40545692  | -1.807267823 | 0.070720531 | 0.11413837  |
| Polr2m        | 1119.135823 | -0.732910261 | 0.189396939 | -3.869704884 | 0.000108967 | 0.000327343 |
| Stum          | 6.087566963 | -0.733006287 | 0.846093679 | -0.866341761 | 0.386302771 | 0.478541611 |
| Sbno2         | 1062.044016 | -0.733169798 | 0.208399524 | -3.518097281 | 0.000434653 | 0.001173763 |
| Cyp2s1        | 25.75026089 | -0.734061    | 0.604525502 | -1.214276317 | 0.224642226 | 0.306057754 |
| Rab35         | 431.6617805 | -0.734097429 | 0.219180102 | -3.349288653 | 0.000810193 | 0.002078582 |
| 1700123K08Rik | 0.237729603 | -0.734676994 | 3.636636898 | -0.202020992 | 0.839900313 | NA          |
| Chmp4b        | 1427.404614 | -0.735198667 | 0.147415439 | -4.987256892 | 6.12E-07    | 2.54E-06    |
| Gusb          | 542.8532547 | -0.735238313 | 0.172130361 | -4.271403994 | 1.94E-05    | 6.56E-05    |
| Cyp4a31       | 406.3951213 | -0.73538146  | 0.243628201 | -3.018457862 | 0.002540647 | 0.005876927 |
| Lrch3         | 394.2204721 | -0.735719825 | 0.182561417 | -4.029985281 | 5.58E-05    | 0.000175289 |
| Atad5         | 78.89545744 | -0.735773537 | 0.396309767 | -1.856561706 | 0.063373536 | 0.103654614 |
| Tmppe         | 32.34802764 | -0.73582552  | 0.372871667 | -1.973401537 | 0.048449833 | 0.082186343 |
| Rpl3          | 7012.423487 | -0.735930406 | 0.175652507 | -4.18969485  | 2.79E-05    | 9.20E-05    |
| Rgl1          | 190.7497756 | -0.737031065 | 0.334215046 | -2.205259979 | 0.027435856 | 0.049752843 |
| Gm43564       | 1.185238553 | -0.737032993 | 1.886054299 | -0.390780368 | 0.695959588 | NA          |
| Zfp3612       | 1495.588565 | -0.73710536  | 0.240490873 | -3.065003465 | 0.002176675 | 0.005114106 |
| Tln1          | 2826.530834 | -0.737894831 | 0.1982411   | -3.722203498 | 0.000197492 | 0.000567955 |
| Kdm2b         | 246.5314174 | -0.737916121 | 0.196980551 | -3.746136947 | 0.000179579 | 0.000519595 |
| H2bc8         | 10.49358954 | -0.738347176 | 0.762700332 | -0.968069823 | 0.3330095   | 0.425158837 |
| Mttr6         | 507.874801  | -0.738929544 | 0.16230003  | -4.552861406 | 5.29E-06    | 1.94E-05    |
| Mal2          | 1363.060364 | -0.738961362 | 0.183193435 | -4.033776438 | 5.49E-05    | 0.000172643 |
| Bbx           | 329.4695043 | -0.739264268 | 0.182273598 | -4.055794557 | 5.00E-05    | 0.000158237 |
| Nrip3         | 2.539824862 | -0.739578044 | 1.16056413  | -0.637257369 | 0.523957215 | 0.612187142 |
| Pax8          | 3.067604027 | -0.740029306 | 1.394080536 | -0.53083684  | 0.595531849 | 0.678198194 |
| Gm7542        | 1.189625522 | -0.740629313 | 2.096440556 | -0.353279424 | 0.723878969 | NA          |
| Ica1          | 56.68194374 | -0.740660268 | 0.295058222 | -2.510217346 | 0.012065687 | 0.023993449 |
| Inpp1         | 316.4080429 | -0.741418557 | 0.187222149 | -3.960100663 | 7.49E-05    | 0.000231001 |
| Cdh24         | 52.94083301 | -0.741534165 | 0.351961657 | -2.106860648 | 0.035129661 | 0.061836908 |
| Gm8141        | 0.684579594 | -0.74156673  | 2.189456744 | -0.338698964 | 0.734836521 | NA          |
| Ppm1l         | 352.4865466 | -0.742210033 | 0.346375361 | -2.142791076 | 0.032129878 | 0.057238826 |
| Phf21b        | 21.72035771 | -0.742232378 | 0.814318414 | -0.911476843 | 0.362044181 | 0.454534885 |
| Plagl1        | 41.85914352 | -0.742236603 | 0.451432359 | -1.644181211 | 0.100138777 | 0.154592581 |
| Agpat1        | 381.8848197 | -0.742257162 | 0.228652522 | -3.246223382 | 0.00116947  | 0.002913082 |
| Csrnp1        | 310.5698635 | -0.742557158 | 0.376205814 | -1.973805643 | 0.048403847 | 0.082132854 |
| Pigt          | 928.5701857 | -0.742825121 | 0.209198546 | -3.550813968 | 0.000384042 | 0.001048214 |
| Gm9936        | 0.68373867  | -0.742883165 | 2.190057347 | -0.339207175 | 0.734453665 | NA          |
| Dusp10        | 86.56158856 | -0.74323945  | 0.303806879 | -2.446420739 | 0.014428252 | 0.028117608 |

|               |             |              |             |              |             |             |
|---------------|-------------|--------------|-------------|--------------|-------------|-------------|
| Grhl1         | 22.20039703 | -0.743395317 | 0.480998723 | -1.545524513 | 0.122219444 | 0.18317337  |
| Rph3a1        | 91.91058324 | -0.743660398 | 0.250219084 | -2.97203709  | 0.002958309 | 0.006761397 |
| Tube2         | 304.9466204 | -0.743841887 | 0.247861675 | -3.001036306 | 0.002690625 | 0.006190253 |
| Abcd2         | 151.6417048 | -0.743882327 | 0.352123585 | -2.11256036  | 0.034638415 | 0.061082955 |
| Ube2d1        | 326.4649654 | -0.744409042 | 0.215091991 | -3.460886836 | 0.000538399 | 0.00143103  |
| Gm45551       | 510.6609283 | -0.745516491 | 0.200500531 | -3.718276886 | 0.000200586 | 0.00057598  |
| Rab2b         | 103.9489479 | -0.745524379 | 0.319477883 | -2.333571177 | 0.019618187 | 0.03695998  |
| Ptger2        | 17.52117253 | -0.745746404 | 0.486328842 | -1.533420062 | 0.125172389 | 0.186877867 |
| Elmsan1       | 386.3076435 | -0.745774847 | 0.151710839 | -4.915765108 | 8.84E-07    | 3.60E-06    |
| Tmem184b      | 624.2829815 | -0.746268133 | 0.233356037 | -3.197980823 | 0.001383935 | 0.003396188 |
| Slc3a2        | 1090.746133 | -0.746489627 | 0.265121219 | -2.815654025 | 0.004867806 | 0.01060664  |
| Gm16976       | 1.683726517 | -0.746632632 | 1.760748315 | -0.424042792 | 0.671534606 | 0.743692291 |
| Bax           | 786.0179387 | -0.746929209 | 0.146459155 | -5.099914783 | 3.40E-07    | 1.46E-06    |
| Rps10-ps2     | 5.437325167 | -0.747008484 | 0.946860184 | -0.788932196 | 0.430151637 | 0.521789178 |
| Gnl3l         | 442.1835998 | -0.747366981 | 0.1534853   | -4.869306562 | 1.12E-06    | 4.49E-06    |
| Gm1673        | 4.501571885 | -0.747443018 | 1.214926008 | -0.615216905 | 0.538411485 | 0.62560244  |
| Ints5         | 275.6637164 | -0.747480777 | 0.232461734 | -3.215500303 | 0.001302174 | 0.003214983 |
| Acer3         | 428.587707  | -0.747532136 | 0.199220606 | -3.752283213 | 0.000175231 | 0.000508744 |
| Camsap1       | 380.3284533 | -0.747823633 | 0.230184209 | -3.248805098 | 0.001158909 | 0.002889306 |
| Gm4939        | 0.687970596 | -0.748246836 | 2.189201087 | -0.341789907 | 0.732509006 | NA          |
| AW554918      | 102.0347962 | -0.748365886 | 0.270647897 | -2.765090339 | 0.005690703 | 0.01223017  |
| Sirt6         | 145.7102669 | -0.748453211 | 0.255603709 | -2.928178213 | 0.003409546 | 0.007691668 |
| Gm3055        | 36.00524226 | -0.748783079 | 0.448379163 | -1.669977424 | 0.094923383 | 0.147733991 |
| Rplp0         | 10580.02926 | -0.749236281 | 0.147364897 | -5.084224925 | 3.69E-07    | 1.57E-06    |
| Cd320         | 87.30680577 | -0.749245656 | 0.300872186 | -2.490245662 | 0.012765483 | 0.025220297 |
| Prr14l        | 380.865393  | -0.749516213 | 0.269091093 | -2.785362397 | 0.005346793 | 0.011557262 |
| Gm4779        | 3.349375763 | -0.749663469 | 1.36541345  | -0.549037706 | 0.582979573 | 0.666180087 |
| Zdhhc13       | 175.0037839 | -0.749955113 | 0.184323236 | -4.068695446 | 4.73E-05    | 0.000150383 |
| Adat3         | 24.19760412 | -0.750001197 | 0.740446238 | -1.012904326 | 0.311105862 | 0.401894728 |
| Gm4849        | 0.672810561 | -0.750165962 | 2.410643449 | -0.311189099 | 0.75565687  | NA          |
| Mitf          | 96.80985152 | -0.75024281  | 0.267624091 | -2.803345564 | 0.005057545 | 0.010986369 |
| 4930432K21Rik | 3.201276263 | -0.750277171 | 1.291968551 | -0.58072402  | 0.56142647  | 0.646265933 |
| Acap3         | 136.0334231 | -0.750504211 | 0.282529717 | -2.656372648 | 0.007898628 | 0.01644149  |
| Gnptab        | 267.8092786 | -0.750505388 | 0.189693302 | -3.956414802 | 7.61E-05    | 0.000234296 |
| Pspc1         | 206.32656   | -0.750550881 | 0.226527666 | -3.313285716 | 0.000922067 | 0.002342683 |
| Gm28042       | 50.96143056 | -0.7507838   | 0.522133153 | -1.437916354 | 0.150457789 | 0.218458187 |
| Igf2r         | 1248.670752 | -0.751105329 | 0.185135722 | -4.057052424 | 4.97E-05    | 0.000157534 |
| Rps3          | 5945.096907 | -0.751728064 | 0.217518352 | -3.455929389 | 0.000548399 | 0.001454887 |
| Neo1          | 371.496782  | -0.752118517 | 0.197439992 | -3.809352457 | 0.000139331 | 0.000411415 |
| Gas2l1        | 461.9886576 | -0.752225003 | 0.193606302 | -3.885333259 | 0.00010219  | 0.000308505 |
| Zbtb39        | 387.5677747 | -0.752804015 | 0.181776836 | -4.141363848 | 3.45E-05    | 0.000112302 |
| Gm14830       | 1.235671697 | -0.753445629 | 1.581665896 | -0.476362063 | 0.633816457 | NA          |
| Dyrk3         | 42.84688208 | -0.753525426 | 0.379542665 | -1.985351041 | 0.047105429 | 0.080201074 |
| Fancg         | 73.75446562 | -0.754280202 | 0.415156808 | -1.816856153 | 0.069239142 | 0.112087066 |
| Rpgr          | 81.16998576 | -0.754451101 | 0.41110197  | -1.835192132 | 0.066477227 | 0.108149889 |
| H2az1         | 1442.536589 | -0.754580556 | 0.263702726 | -2.861481823 | 0.004216657 | 0.009327308 |
| Zbtb42        | 105.9607427 | -0.754655595 | 0.301614137 | -2.502056443 | 0.012347424 | 0.024499404 |
| Spic          | 36.90250744 | -0.755037467 | 0.579553774 | -1.302791046 | 0.192646108 | 0.268758663 |
| Kcnk2         | 4.456448084 | -0.755128129 | 1.31275522  | -0.575223864 | 0.565139906 | 0.649356683 |
| Pgs1          | 374.0714919 | -0.755578744 | 0.204815748 | -3.689065663 | 0.000225079 | 0.000640486 |
| Gm29397       | 1.815321901 | -0.755675386 | 2.043367419 | -0.369818653 | 0.711517616 | 0.777062929 |
| Myh14         | 774.244946  | -0.755717824 | 0.25992707  | -2.907422548 | 0.003644206 | 0.008167007 |
| Tmprss5       | 1.241900614 | -0.756470514 | 2.084670804 | -0.362872887 | 0.716699841 | NA          |
| Usp12         | 571.5302742 | -0.756514287 | 0.197651264 | -3.827520614 | 0.000129441 | 0.000383641 |
| Kif17         | 2.97744456  | -0.757703252 | 1.246383615 | -0.607921384 | 0.543239616 | 0.629710273 |
| Med12l        | 80.74629456 | -0.757916287 | 0.480436128 | -1.577558895 | 0.114666982 | 0.173686602 |
| Laptm4b       | 548.8441525 | -0.757934219 | 0.15541436  | -4.876860918 | 1.08E-06    | 4.33E-06    |
| Tmsb15b1      | 11.70634491 | -0.759400343 | 0.601477607 | -1.262557963 | 0.206748083 | 0.285326748 |
| Pld3          | 694.9330208 | -0.759454884 | 0.173303442 | -4.382226194 | 1.17E-05    | 4.10E-05    |
| Arl6ip5       | 865.1911254 | -0.760271946 | 0.184684927 | -4.116589035 | 3.85E-05    | 0.000124083 |
| Fnbp1         | 752.0164985 | -0.760736786 | 0.190931274 | -3.984348757 | 6.77E-05    | 0.000210197 |
| Dusp16        | 974.7144369 | -0.760881857 | 0.249927294 | -3.044412814 | 0.00233135  | 0.00543854  |
| Vhl           | 256.1431469 | -0.761000103 | 0.203737145 | -3.735205494 | 0.000187562 | 0.000541775 |
| Wfikkn1       | 13.204256   | -0.762587387 | 0.540052653 | -1.412061181 | 0.157931948 | 0.22741987  |
| Nepn          | 1.170569106 | -0.762822547 | 2.21085091  | -0.345035725 | 0.730067513 | NA          |
| CAA01144662.1 | 40.7117232  | -0.763234388 | 0.592585961 | -1.287972443 | 0.197755556 | 0.274561179 |

|          |             |              |             |              |             |             |
|----------|-------------|--------------|-------------|--------------|-------------|-------------|
| Zfp710   | 439.1370255 | -0.763249948 | 0.207982066 | -3.669787318 | 0.000242752 | 0.00068665  |
| Vrk1     | 227.208336  | -0.763738058 | 0.248006123 | -3.079512914 | 0.002073394 | 0.004886262 |
| Pik3r3   | 66.61585091 | -0.763789882 | 0.28364919  | -2.692727172 | 0.007087024 | 0.014904957 |
| Dvl3     | 340.523015  | -0.764045173 | 0.224310937 | -3.406187779 | 0.000658769 | 0.001718807 |
| Sema6d   | 301.8572701 | -0.764173488 | 0.302578011 | -2.525542041 | 0.011551996 | 0.023125696 |
| Msi2     | 722.621731  | -0.764276382 | 0.169903607 | -4.498294027 | 6.85E-06    | 2.48E-05    |
| Anapc4   | 518.2798407 | -0.764502766 | 0.243018204 | -3.145866249 | 0.001655957 | 0.003988522 |
| Ankrd12  | 146.5050407 | -0.764687518 | 0.201079231 | -3.802916467 | 0.000143003 | 0.000421419 |
| Il34     | 39.87115735 | -0.764739266 | 0.354663354 | -2.156239871 | 0.03106494  | 0.055530575 |
| Dusp27   | 0.773320342 | -0.765744539 | 2.830439141 | -0.270539129 | 0.786745518 | NA          |
| Prkd2    | 227.1352786 | -0.766186566 | 0.18890887  | -4.054092647 | 5.03E-05    | 0.000159304 |
| Adgrb1   | 1.130019137 | -0.766522248 | 2.354700667 | -0.325528531 | 0.744781093 | NA          |
| Gm3362   | 8.239693755 | -0.766745011 | 0.705500901 | -1.0868094   | 0.277121053 | 0.364252868 |
| Yjefn3   | 10.24011702 | -0.767547619 | 0.735318379 | -1.043830321 | 0.296563901 | 0.385983727 |
| Dact1    | 98.48865872 | -0.767557381 | 0.425467932 | -1.804031099 | 0.071226432 | 0.114857001 |
| Gm28069  | 0.695348933 | -0.767717646 | 2.446148222 | -0.313847558 | 0.753636822 | NA          |
| Gm20716  | 1138.725717 | -0.767967637 | 0.11317338  | -6.785762159 | 1.15E-11    | 8.39E-11    |
| Ntmt1    | 261.314487  | -0.767990988 | 0.222358266 | -3.45384501  | 0.000552655 | 0.001465494 |
| Gm7285   | 5.615852437 | -0.768791704 | 0.811307868 | -0.947595523 | 0.343335406 | 0.435763997 |
| Zfp128   | 43.00604909 | -0.769209217 | 0.340007592 | -2.262329535 | 0.023677051 | 0.043665769 |
| Vegfc    | 98.17214983 | -0.76933804  | 0.266473155 | -2.887112732 | 0.003887949 | 0.00865523  |
| Ppp3cc   | 105.9391443 | -0.769362929 | 0.279382661 | -2.753796265 | 0.005890843 | 0.012608548 |
| Rnf24    | 163.3081235 | -0.769554215 | 0.290626137 | -2.647918124 | 0.008098914 | 0.016815282 |
| Pgbd5    | 0.695241455 | -0.769555166 | 2.904661484 | -0.264937987 | 0.791057234 | NA          |
| Mapre1   | 852.7089158 | -0.769813429 | 0.251931272 | -3.055648563 | 0.002245743 | 0.005258988 |
| Slc43a3  | 693.0934966 | -0.770016882 | 0.292926616 | -2.628702347 | 0.008571135 | 0.017696228 |
| Nfatc4   | 39.89414015 | -0.770442862 | 0.457991722 | -1.682220059 | 0.092526176 | 0.144488985 |
| Ptpn6    | 634.913837  | -0.770671826 | 0.207665836 | -3.711115139 | 0.000206348 | 0.000591231 |
| Dcaf7    | 1042.146048 | -0.770769641 | 0.179341094 | -4.297785995 | 1.73E-05    | 5.87E-05    |
| Trim52   | 3.727610789 | -0.770897035 | 1.17718279  | -0.654866043 | 0.512554005 | 0.601612841 |
| Ofd1     | 163.0875807 | -0.771043891 | 0.239017209 | -3.225892785 | 0.001255804 | 0.003108151 |
| Olfr832  | 1.821403416 | -0.771096696 | 1.452243334 | -0.530969348 | 0.59544002  | 0.678138918 |
| Nop58    | 830.1012984 | -0.771612631 | 0.205852237 | -3.748381084 | 0.000177798 | 0.000515538 |
| Efhd2    | 1130.73269  | -0.771750432 | 0.194900558 | -3.959713815 | 7.50E-05    | 0.000231334 |
| Figl2    | 304.3609656 | -0.771782368 | 0.1939122   | -3.980060919 | 6.89E-05    | 0.000213674 |
| Bmp15    | 0.694772963 | -0.772286195 | 2.446555977 | -0.315662589 | 0.752258625 | NA          |
| Ppp1r16b | 57.59118415 | -0.772649314 | 0.330749271 | -2.336057496 | 0.019488245 | 0.03673141  |
| Tcaf2    | 19.39746609 | -0.772840248 | 0.517383949 | -1.493746085 | 0.135241998 | 0.19930892  |
| Rerg     | 76.89290026 | -0.772876035 | 0.307112899 | -2.516586045 | 0.011849796 | 0.02362476  |
| Fam222a  | 113.1151682 | -0.77397313  | 0.320154749 | -2.417496954 | 0.015627665 | 0.030209823 |
| Gm14411  | 2.419514715 | -0.774501878 | 1.324521772 | -0.584740768 | 0.558722038 | 0.643804887 |
| Gm16487  | 1.223890925 | -0.774676324 | 1.848725956 | -0.419032535 | 0.675192355 | NA          |
| Nostrin  | 545.8795064 | -0.775488296 | 0.23047271  | -3.364772757 | 0.000766067 | 0.001975482 |
| Ipo9     | 628.4214794 | -0.775998243 | 0.179160578 | -4.331300182 | 1.48E-05    | 5.09E-05    |
| Necap2   | 291.5136753 | -0.776215871 | 0.148157223 | -5.239136225 | 1.61E-07    | 7.25E-07    |
| Zfat     | 45.46661198 | -0.777091024 | 0.335848055 | -2.313817251 | 0.020677749 | 0.038708055 |
| Plekhh3  | 106.9231973 | -0.777546452 | 0.268199997 | -2.899129236 | 0.003742006 | 0.008362003 |
| Dynl1b   | 283.9781846 | -0.77774294  | 0.200221497 | -3.884412762 | 0.000102578 | 0.000309567 |
| Tcf3     | 611.6448668 | -0.777743194 | 0.169607203 | -4.585555225 | 4.53E-06    | 1.68E-05    |
| Fam83e   | 3.895845453 | -0.778434996 | 1.000642467 | -0.777935198 | 0.436607217 | 0.527999966 |
| Rab20    | 314.3545826 | -0.77864109  | 0.266969407 | -2.916592948 | 0.003538773 | 0.007945344 |
| Rep15    | 9.166473689 | -0.778939989 | 0.673033808 | -1.157356405 | 0.247126777 | 0.331133954 |
| Tet3     | 796.495151  | -0.779298646 | 0.134019835 | -5.814800828 | 6.07E-09    | 3.22E-08    |
| Trgc1    | 6.140415038 | -0.779859943 | 1.024630398 | -0.761113417 | 0.446589327 | 0.537711339 |
| Ankrd53  | 0.228551212 | -0.780374783 | 3.635200446 | -0.214671734 | 0.830023262 | NA          |
| Gm14046  | 0.228551212 | -0.780374783 | 3.635200446 | -0.214671734 | 0.830023262 | NA          |
| Gm21083  | 0.228551212 | -0.780374783 | 3.635200446 | -0.214671734 | 0.830023262 | NA          |
| Gm37246  | 0.228551212 | -0.780374783 | 3.635200446 | -0.214671734 | 0.830023262 | NA          |
| Gm43552  | 0.228551212 | -0.780374783 | 3.635200446 | -0.214671734 | 0.830023262 | NA          |
| Gm7591   | 0.228551212 | -0.780374783 | 3.635200446 | -0.214671734 | 0.830023262 | NA          |
| Gm9633   | 0.228551212 | -0.780374783 | 3.635200446 | -0.214671734 | 0.830023262 | NA          |
| Matn3    | 0.228551212 | -0.780374783 | 3.635200446 | -0.214671734 | 0.830023262 | NA          |
| Oprm1    | 0.228551212 | -0.780374783 | 3.635200446 | -0.214671734 | 0.830023262 | NA          |
| Trgv6    | 0.228551212 | -0.780374783 | 3.635200446 | -0.214671734 | 0.830023262 | NA          |
| Gm18901  | 0.228551212 | -0.780374783 | 3.635200446 | -0.214671734 | 0.830023262 | NA          |
| Klra6    | 0.228551212 | -0.780374783 | 3.635200446 | -0.214671734 | 0.830023262 | NA          |

|               |             |              |             |              |             |    |             |
|---------------|-------------|--------------|-------------|--------------|-------------|----|-------------|
| Ms4a2         | 0.228551212 | -0.780374783 | 3.635200446 | -0.214671734 | 0.830023262 | NA |             |
| Klra13-ps     | 5.173010784 | -0.780515821 | 0.943778279 | -0.827011851 | 0.408230345 |    | 0.500713173 |
| Eef2-ps2      | 0.700029485 | -0.780938831 | 2.445422181 | -0.319347243 | 0.749463212 | NA |             |
| Tmem263       | 263.4516693 | -0.781389924 | 0.185092279 | -4.221623561 | 2.43E-05    |    | 8.08E-05    |
| Gje1          | 1.443430052 | -0.781466032 | 1.712769186 | -0.456258811 | 0.648203879 | NA |             |
| Rapgef2       | 490.3473931 | -0.782442785 | 0.274071032 | -2.854890497 | 0.004305167 |    | 0.009507058 |
| Nrip1         | 251.1024571 | -0.782716341 | 0.200971064 | -3.894671827 | 9.83E-05    |    | 0.000297808 |
| Slc38a1       | 111.956477  | -0.782807898 | 0.24141291  | -3.242609921 | 0.001184402 |    | 0.002945542 |
| Dclk3         | 261.8473938 | -0.782982403 | 0.259157025 | -3.021266366 | 0.002517198 |    | 0.005828221 |
| Llgl1         | 311.1707013 | -0.783170597 | 0.175212787 | -4.469825579 | 7.83E-06    |    | 2.80E-05    |
| Gm12882       | 1.276112315 | -0.783426964 | 1.713576579 | -0.457188184 | 0.647535791 | NA |             |
| Manbal        | 229.2088715 | -0.783803928 | 0.179057516 | -4.377386365 | 1.20E-05    |    | 4.18E-05    |
| Camk2n2       | 35.97136262 | -0.783907266 | 0.383261833 | -2.04535698  | 0.040819677 |    | 0.070649122 |
| Olfr95        | 4.494521323 | -0.783955003 | 1.12742038  | -0.695352875 | 0.486834186 |    | 0.576799227 |
| Spice1        | 116.7246209 | -0.783973774 | 0.322533868 | -2.430671166 | 0.015070886 |    | 0.029222982 |
| Gm49286       | 1.89213323  | -0.784052745 | 2.012758072 | -0.389541473 | 0.696875637 |    | 0.765485558 |
| Cdkn2c        | 193.1232332 | -0.784080392 | 0.341058349 | -2.298962607 | 0.021507063 |    | 0.04009321  |
| Olfr316       | 0.701110673 | -0.784108947 | 2.444667739 | -0.320742543 | 0.748405505 | NA |             |
| Actn1         | 865.7167235 | -0.784314899 | 0.170226233 | -4.607485494 | 4.08E-06    |    | 1.52E-05    |
| Nfkbiz        | 372.5100291 | -0.784367947 | 0.181744183 | -4.315780208 | 1.59E-05    |    | 5.44E-05    |
| Zfp111        | 100.7261505 | -0.784651061 | 0.314982629 | -2.491093121 | 0.012735074 |    | 0.025166053 |
| Faap20        | 262.7817417 | -0.78524048  | 0.18051168  | -4.350081272 | 1.36E-05    |    | 4.70E-05    |
| Dip2b         | 224.8229267 | -0.785718342 | 0.190246858 | -4.1299938   | 3.63E-05    |    | 0.000117622 |
| Kazald1       | 27.55612281 | -0.786586773 | 0.421546641 | -1.865954311 | 0.062047758 |    | 0.101739942 |
| 1110051M2ORik | 69.48587455 | -0.786649305 | 0.344020114 | -2.286637534 | 0.022216989 |    | 0.041294725 |
| Aldoart2      | 1.244008156 | -0.78759624  | 1.849681709 | -0.425348653 | 0.670582531 | NA |             |
| Gm26620       | 9.580290904 | -0.787686433 | 0.803080398 | -0.980831352 | 0.326675915 |    | 0.418262936 |
| Zfp407        | 152.377518  | -0.7877008   | 0.276005694 | -2.853929526 | 0.004318211 |    | 0.009533393 |
| Wdpcp         | 53.69342626 | -0.787715313 | 0.307841528 | -2.558833818 | 0.010502393 |    | 0.021201279 |
| Trim62        | 36.20312085 | -0.787784438 | 0.471308299 | -1.671484335 | 0.09462605  |    | 0.147322823 |
| Igfbp1        | 3415.342573 | -0.787892195 | 0.414643036 | -1.900169848 | 0.057410834 |    | 0.095060207 |
| Nova2         | 29.06854967 | -0.788348618 | 0.44694249  | -1.763870375 | 0.077753806 |    | 0.124103256 |
| Rab37         | 16.78452175 | -0.788977685 | 0.632083171 | -1.248218147 | 0.21195118  |    | 0.291140417 |
| Gata2         | 20.3699359  | -0.789177203 | 0.633872999 | -1.245008391 | 0.213128666 |    | 0.292592809 |
| Gm13777       | 1.256436684 | -0.789433844 | 2.238856498 | -0.352605825 | 0.72438397  | NA |             |
| Lpp           | 1342.425031 | -0.789501415 | 0.147306505 | -5.359582841 | 8.34E-08    |    | 3.87E-07    |
| Col14a1       | 788.0490109 | -0.789970583 | 0.302775815 | -2.60909407  | 0.009078228 |    | 0.018617302 |
| Ankrd52       | 682.4388856 | -0.790489014 | 0.177135944 | -4.46261214  | 8.10E-06    |    | 2.89E-05    |
| Rel           | 157.3907367 | -0.790662051 | 0.287307893 | -2.751967739 | 0.005923836 |    | 0.012675982 |
| Prmt3         | 241.2221071 | -0.79081032  | 0.232195687 | -3.405792455 | 0.000659723 |    | 0.001720771 |
| Ccdc63        | 7.412089698 | -0.791437906 | 0.821652019 | -0.963227605 | 0.335433315 |    | 0.427600888 |
| Fam71e1       | 23.06521018 | -0.791917708 | 0.585273945 | -1.353071866 | 0.176032673 |    | 0.24921151  |
| Dnajc1        | 1043.829504 | -0.792162287 | 0.164407368 | -4.818289441 | 1.45E-06    |    | 5.72E-06    |
| Six1          | 1.366549565 | -0.792170113 | 2.037014791 | -0.388887757 | 0.697359179 | NA |             |
| Eef1akmt3     | 7.504804363 | -0.792511035 | 0.741981688 | -1.068100531 | 0.285475166 |    | 0.373747273 |
| Frk           | 115.7008729 | -0.792558984 | 0.340355907 | -2.328618271 | 0.019879297 |    | 0.03737343  |
| Ralgapa1      | 293.3318109 | -0.792615618 | 0.232583673 | -3.407873001 | 0.000654714 |    | 0.00170972  |
| Ifnar1        | 909.9344204 | -0.793077916 | 0.15025235  | -5.27830625  | 1.30E-07    |    | 5.91E-07    |
| Neddb4        | 1671.232904 | -0.793319305 | 0.182888103 | -4.337730505 | 1.44E-05    |    | 4.96E-05    |
| Rbfox1        | 0.304018647 | -0.793341096 | 3.427637941 | -0.23145417  | 0.816961985 | NA |             |
| Tmprss4       | 10.7269667  | -0.793805063 | 0.710050267 | -1.117956149 | 0.263585722 |    | 0.34907243  |
| Tigd3         | 5.601802776 | -0.794552867 | 0.921768792 | -0.861987164 | 0.388694581 |    | 0.481050107 |
| Gm7754        | 0.800121621 | -0.79471416  | 2.14423688  | -0.370627969 | 0.710914647 | NA |             |
| Gm13302       | 4.09058318  | -0.794765915 | 0.998691895 | -0.795806913 | 0.426144273 |    | 0.518107799 |
| Zfp697        | 89.81944252 | -0.795221385 | 0.23597099  | -3.369996393 | 0.000751692 |    | 0.001941054 |
| 4930539E08Rik | 14.60523529 | -0.796850377 | 0.548410152 | -1.453019013 | 0.146218475 |    | 0.21318161  |
| Gm8203        | 58.86866538 | -0.796952228 | 1.119766276 | -0.711713011 | 0.476642509 |    | 0.567127408 |
| Tns1          | 3510.361243 | -0.797112779 | 0.342903909 | -2.324595192 | 0.020093616 |    | 0.03773474  |
| Ankfy1        | 769.7405816 | -0.797579043 | 0.161728881 | -4.931580793 | 8.16E-07    |    | 3.34E-06    |
| Lmx1b         | 0.317724124 | -0.797902329 | 3.38641207  | -0.235618794 | 0.813728488 | NA |             |
| Ifit1bl2      | 4.98392151  | -0.798452821 | 1.462971098 | -0.545774843 | 0.585220718 |    | 0.668330842 |
| Odf2          | 383.3049923 | -0.798717426 | 0.192042341 | -4.159069405 | 3.20E-05    |    | 0.000104381 |
| Rnf207        | 6.463462613 | -0.798964374 | 0.778939977 | -1.025707241 | 0.3050296   |    | 0.395117744 |
| Ston1         | 122.6438579 | -0.799780058 | 0.342043349 | -2.338241808 | 0.019374708 |    | 0.036549742 |
| Palb2         | 41.57338847 | -0.799926325 | 0.411633046 | -1.943299576 | 0.051979973 |    | 0.087305869 |
| Kctd7         | 79.3724622  | -0.80150916  | 0.33795164  | -2.371668209 | 0.017707984 |    | 0.033741558 |



|               |             |              |             |              |                |             |
|---------------|-------------|--------------|-------------|--------------|----------------|-------------|
| Egfl8         | 20.30902446 | -0.801536449 | 0.533330708 | -1.502888239 | 0.132867866    | 0.196591858 |
| Gmfg          | 136.9835513 | -0.801587008 | 0.245911386 | -3.25965797  | 0.001115466    | 0.002788339 |
| Tm4sf1        | 318.113369  | -0.801754338 | 0.328459069 | -2.440956619 | 0.014648414    | 0.028491291 |
| Mbip          | 135.227323  | -0.80184075  | 0.255618657 | -3.136863163 | 0.001707658    | 0.004098572 |
| Olfr1048      | 2.43563659  | -0.802537043 | 1.363695076 | -0.588501826 | 0.556195508    | 0.641283716 |
| Snhg16        | 97.88847071 | -0.802802027 | 0.331913199 | -2.418710762 | 0.01557562     | 0.030122877 |
| Mrtfb         | 783.8249506 | -0.803219954 | 0.163826482 | -4.902870072 | 9.44E-07       | 3.82E-06    |
| Ctdsp2        | 1850.514129 | -0.803464985 | 0.133574691 | -6.015098971 | 1.80E-09       | 1.01E-08    |
| Accs          | 142.460389  | -0.803587219 | 0.354356916 | -2.267733979 | 0.023345426    | 0.043170931 |
| Tnk1          | 4.113482239 | -0.804038071 | 1.200793228 | -0.669589112 | 0.503119757    | 0.592540983 |
| Phlpp2        | 132.2410987 | -0.804462105 | 0.29951132  | -2.685915531 | 0.007233137    | 0.01518742  |
| H3c8          | 2.594944333 | -0.805215224 | 1.44812604  | -0.556039462 | 0.578183878    | 0.661801985 |
| Gm5741        | 2.115864839 | -0.805816338 | 1.492733887 | -0.539825849 | 0.589317139    | 0.672275114 |
| Tor3a         | 209.2419525 | -0.806141039 | 0.474924251 | -1.697409716 | 0.089619227    | 0.140748833 |
| Klrc1         | 7.40743695  | -0.806533429 | 0.855064542 | -0.943242749 | 0.345556752    | 0.437866174 |
| Tcof1         | 281.0853972 | -0.806604229 | 0.180529168 | -4.467999477 | 7.90E-06       | 2.83E-05    |
| Plgrkt        | 288.0046559 | -0.806832628 | 0.195561301 | -4.125727452 | 3.70E-05       | 0.000119665 |
| Oas1b         | 85.76654714 | -0.807657701 | 0.304936824 | -2.648606652 | 0.008082434    | 0.016783111 |
| Rasgef1b      | 335.6956861 | -0.807874988 | 0.336083267 | -2.40379414  | 0.016225908    | 0.031214091 |
| Lnpep         | 84.14687633 | -0.807924523 | 0.337190164 | -2.396050091 | 0.016572825    | 0.031806093 |
| Brd8          | 807.7607907 | -0.807971528 | 0.170882626 | -4.728225128 | 2.26E-06       | 8.68E-06    |
| Zfp740        | 1152.079353 | -0.808649437 | 0.11745567  | -6.884720327 | 5.79E-12       | 4.36E-11    |
| Proser3       | 125.3423839 | -0.809726903 | 0.237543626 | -3.408750287 | 0.000652612    | 0.001705877 |
| Cep120        | 356.1368512 | -0.810002391 | 0.165243747 | -4.901864084 | 9.49E-07       | 3.84E-06    |
| E130208F15Rik | 6.974046547 | -0.810831863 | 0.866104537 | -0.936182445 | 0.34917926     | 0.441668499 |
| Gm15644       | 0.249962838 | -0.811079013 | 3.63482084  | -0.223141401 | 0.823425458 NA |             |
| Tmem254c      | 447.9378902 | -0.811376187 | 0.951351301 | -0.852867061 | 0.39373303     | 0.486332466 |
| Mid2          | 205.8258878 | -0.811381145 | 0.221704689 | -3.659738323 | 0.000252473    | 0.000711666 |
| E030024N20Rik | 0.2500274   | -0.81212856  | 3.634846177 | -0.223428591 | 0.823201954 NA |             |
| Gm10257       | 0.266372764 | -0.812162499 | 3.634846987 | -0.223437878 | 0.823194727 NA |             |
| Igkv1-88      | 0.273650602 | -0.812980664 | 3.634866725 | -0.223661753 | 0.823020509 NA |             |
| Igkv8-34      | 0.273650517 | -0.813000557 | 3.634867205 | -0.223667196 | 0.823016273 NA |             |
| Gm18807       | 0.250085313 | -0.81304126  | 3.634868186 | -0.223678334 | 0.823007606 NA |             |
| Gm49489       | 0.273650198 | -0.813076976 | 3.634869047 | -0.223688107 | 0.823000001 NA |             |
| Dlec1         | 17.72756439 | -0.813106838 | 0.69763128  | -1.165525201 | 0.243806465    | 0.327457073 |
| Olfr893       | 3.884491783 | -0.813486981 | 0.976076081 | -0.833425792 | 0.404604633    | 0.497418316 |
| Pcdh11x       | 3.79583738  | -0.813522827 | 1.270298756 | -0.640418503 | 0.521900557    | 0.610388411 |
| Phyhipl       | 6.434672985 | -0.813569061 | 0.902379588 | -0.901581853 | 0.367279035    | 0.459685264 |
| Rnf19a        | 895.5159661 | -0.813592779 | 0.189740214 | -4.287930133 | 1.80E-05       | 6.11E-05    |
| Slc22a21      | 37.87768457 | -0.813899826 | 0.51444413  | -1.582095659 | 0.113627734    | 0.172311476 |
| Gm17833       | 0.250164315 | -0.814247106 | 3.634897221 | -0.224008289 | 0.822750854 NA |             |
| Kank3         | 159.9050092 | -0.814375955 | 0.300280419 | -2.71205148  | 0.006686821    | 0.01413477  |
| Six6          | 1.456088794 | -0.814432893 | 1.638933387 | -0.496928612 | 0.619239394 NA |             |
| Ing1          | 312.7298233 | -0.814643652 | 0.177065202 | -4.600811684 | 4.21E-06       | 1.56E-05    |
| Gm31663       | 0.250195322 | -0.81470882  | 3.634908331 | -0.224134626 | 0.82265255 NA  |             |
| Gm18813       | 0.266420974 | -0.814845549 | 3.634911618 | -0.224172039 | 0.82262344 NA  |             |
| C4bp-ps1      | 9.08416204  | -0.814869785 | 1.050780932 | -0.775489696 | 0.438050352    | 0.529411768 |
| Skint2        | 0.273646597 | -0.814918913 | 3.634913391 | -0.224192113 | 0.82260782 NA  |             |
| Ifi44l        | 0.273646614 | -0.814986986 | 3.634915029 | -0.224210739 | 0.822593327 NA |             |
| Cldn9         | 0.273646624 | -0.81501631  | 3.634915734 | -0.224218763 | 0.822587084 NA |             |
| Gm7168        | 0.273646657 | -0.815086708 | 3.634917427 | -0.224238026 | 0.822572096 NA |             |
| Zscan4-ps1    | 0.266426858 | -0.815122835 | 3.634918287 | -0.224247912 | 0.822564405 NA |             |
| Llg12         | 1325.270902 | -0.815127659 | 0.208594399 | -3.907715947 | 9.32E-05       | 0.000283442 |
| Dsc3          | 0.250228867 | -0.815201552 | 3.634920181 | -0.224269451 | 0.822547646 NA |             |
| Gm9029        | 0.266428753 | -0.81521047  | 3.634920394 | -0.224271891 | 0.822545747 NA |             |
| Casr          | 0.250233291 | -0.815266019 | 3.63492173  | -0.22428709  | 0.822533921 NA |             |
| Nup205        | 373.1215269 | -0.815272655 | 0.215192604 | -3.788571913 | 0.000151516    | 0.000444356 |
| Gm15455       | 0.273646826 | -0.815299628 | 3.634922546 | -0.224296286 | 0.822526766 NA |             |
| Olfr1020      | 0.273646838 | -0.815310418 | 3.634922805 | -0.224299239 | 0.822524469 NA |             |
| Ddn           | 0.266432109 | -0.815363858 | 3.634924081 | -0.224313862 | 0.822513091 NA |             |
| St18          | 0.266434066 | -0.815452213 | 3.634926205 | -0.224338038 | 0.82249428 NA  |             |
| Nkpd1         | 0.260266859 | -0.816005681 | 3.634939502 | -0.224489481 | 0.822376451 NA |             |
| Ctdspl2       | 180.141234  | -0.816273915 | 0.250487557 | -3.25874037  | 0.00111908     | 0.002796143 |
| Oosp1         | 0.260293071 | -0.816630755 | 3.634954512 | -0.224660516 | 0.822243383 NA |             |
| Gm11942       | 0.687634738 | -0.816801011 | 2.384581151 | -0.342534374 | 0.73194878 NA  |             |
| Atp6v1g2      | 79.89227882 | -0.816808247 | 0.383722071 | -2.128645466 | 0.033283604    | 0.059013924 |

|               |             |              |             |              |             |             |
|---------------|-------------|--------------|-------------|--------------|-------------|-------------|
| Zmynd10       | 6.575032166 | -0.817135327 | 0.769421868 | -1.062012091 | 0.288230196 | 0.377023585 |
| Gucy1b1       | 90.00194248 | -0.817140635 | 0.313266551 | -2.608451598 | 0.009095287 | 0.018643316 |
| Gm49987       | 0.260315552 | -0.817152128 | 3.634967024 | -0.224803175 | 0.822132396 | NA          |
| Ttc30a1       | 28.20453864 | -0.817304155 | 0.428050214 | -1.909365135 | 0.056215005 | 0.093324901 |
| Naip1         | 6.82478471  | -0.81783058  | 0.80242581  | -1.01919775  | 0.308109095 | 0.398682645 |
| Nup160        | 244.2175735 | -0.818969161 | 0.22955633  | -3.567617411 | 0.000360242 | 0.000988    |
| Ddit3         | 235.6675917 | -0.819111704 | 0.24634798  | -3.325018955 | 0.000884125 | 0.00225671  |
| Msh6          | 351.1712953 | -0.819116867 | 0.160402861 | -5.106622556 | 3.28E-07    | 1.41E-06    |
| Pcdha1        | 0.235937473 | -0.819594345 | 3.635371721 | -0.225449942 | 0.821629263 | NA          |
| Faxc          | 6.731994844 | -0.819775535 | 0.82941976  | -0.988372323 | 0.322970337 | 0.414296336 |
| Rpl9-ps7      | 0.721238632 | -0.819830889 | 2.475227241 | -0.331214393 | 0.740482549 | NA          |
| Mrgprf        | 4.924703996 | -0.819841025 | 0.849697163 | -0.964862614 | 0.334613629 | 0.426727495 |
| Wdr78         | 22.76102323 | -0.819937644 | 0.464646627 | -1.764647793 | 0.077622978 | 0.123932413 |
| Uba7          | 391.3339921 | -0.820269558 | 0.226170765 | -3.626770947 | 0.000286988 | 0.000800129 |
| Hoxd9         | 1.295789618 | -0.82057672  | 1.715622745 | -0.478296713 | 0.632439035 | NA          |
| Suco          | 380.976669  | -0.820881969 | 0.168403744 | -4.874487636 | 1.09E-06    | 4.38E-06    |
| Orc6          | 130.0976057 | -0.821323887 | 0.216061975 | -3.801334719 | 0.000143919 | 0.000423899 |
| Pprc1         | 391.1400567 | -0.821520898 | 0.26008994  | -3.158603131 | 0.001585272 | 0.003835067 |
| Sp2           | 144.1625416 | -0.822185519 | 0.240266664 | -3.421970847 | 0.00062169  | 0.001632055 |
| Arhgef5       | 965.3526939 | -0.82249164  | 0.13997205  | -5.876113411 | 4.20E-09    | 2.27E-08    |
| H3c13         | 1.782993176 | -0.82281923  | 2.376531661 | -0.346226917 | 0.729172187 | 0.792232965 |
| Nipal4        | 1.481669695 | -0.82296858  | 1.531626847 | -0.537316632 | 0.591048918 | NA          |
| Sipa1l3       | 428.6028661 | -0.823501103 | 0.218160868 | -3.774742507 | 0.000160173 | 0.000467814 |
| Stt3b         | 2204.895356 | -0.823546611 | 0.116790414 | -7.051491468 | 1.77E-12    | 1.41E-11    |
| Tshr          | 1.963277859 | -0.82380023  | 1.667535489 | -0.494022607 | 0.621290214 | 0.700605607 |
| Cblb          | 244.7646432 | -0.823831478 | 0.204944031 | -4.019787619 | 5.83E-05    | 0.000182581 |
| Olfr1543-ps1  | 0.76272797  | -0.824111311 | 2.374404212 | -0.347081304 | 0.728530238 | NA          |
| Gm5075        | 2.586180838 | -0.827257188 | 1.380927482 | -0.59905911  | 0.549133468 | 0.634729633 |
| Vmn1r40       | 0.398169034 | -0.827926325 | 3.215487905 | -0.257480777 | 0.796807653 | NA          |
| Phtf1         | 153.8341514 | -0.828209164 | 0.192698869 | -4.297945119 | 1.72E-05    | 5.87E-05    |
| Ctnna1        | 3841.227542 | -0.828437144 | 0.156296659 | -5.300414944 | 1.16E-07    | 5.27E-07    |
| Fbxw11        | 693.1891535 | -0.82865886  | 0.151406283 | -5.473081054 | 4.42E-08    | 2.11E-07    |
| Zfp414        | 166.4723223 | -0.828725262 | 0.29337997  | -2.824750656 | 0.004731742 | 0.010336589 |
| 2410002F23Rik | 696.4597436 | -0.829180112 | 0.183402795 | -4.521087652 | 6.15E-06    | 2.24E-05    |
| Xcr1          | 9.976951513 | -0.829793976 | 0.751013404 | -1.104899022 | 0.269203346 | 0.355517751 |
| Zbtb2         | 156.0244927 | -0.829930015 | 0.21287963  | -3.898588207 | 9.68E-05    | 0.000293398 |
| Cdh23         | 0.869739199 | -0.830240883 | 2.782686183 | -0.298359509 | 0.76542879  | NA          |
| Serinc5       | 855.6209414 | -0.830382204 | 0.170551761 | -4.868798768 | 1.12E-06    | 4.50E-06    |
| Bin1          | 398.1712555 | -0.830462797 | 0.183328902 | -4.529906568 | 5.90E-06    | 2.15E-05    |
| Gimap1        | 50.12021647 | -0.830481773 | 0.339027586 | -2.449599403 | 0.014301523 | 0.027896151 |
| 4932438H23Rik | 0.263244159 | -0.831588915 | 3.634090038 | -0.228830025 | 0.819001029 | NA          |
| Raly          | 1808.005008 | -0.831776969 | 0.188054355 | -4.423066777 | 9.73E-06    | 3.44E-05    |
| Trim38        | 0.764739746 | -0.832012767 | 2.433661876 | -0.341876896 | 0.732443538 | NA          |
| Grap          | 65.77619497 | -0.832834021 | 0.338214017 | -2.462446794 | 0.013799265 | 0.027009169 |
| Adam11        | 1467.589659 | -0.833178568 | 0.64384992  | -1.294057113 | 0.195645694 | 0.272208258 |
| Tcf12         | 507.0221858 | -0.833664849 | 0.172877611 | -4.822283484 | 1.42E-06    | 5.61E-06    |
| Ssrp1         | 1237.323871 | -0.833744492 | 0.197656439 | -4.218149916 | 2.46E-05    | 8.19E-05    |
| Zmynd15       | 173.9684039 | -0.834160491 | 0.232606909 | -3.586138066 | 0.000335611 | 0.000923879 |
| Lrrc32        | 189.4980642 | -0.834696389 | 0.262189925 | -3.1835563   | 0.001454778 | 0.003547062 |
| Gm5176        | 3.524825973 | -0.834698794 | 1.144530494 | -0.729293626 | 0.46582207  | 0.556271691 |
| Pianp         | 8.354043319 | -0.834815663 | 0.794184429 | -1.051160956 | 0.293184672 | 0.382416148 |
| Art2b         | 7.510751255 | -0.834969939 | 1.101110772 | -0.758297857 | 0.44827269  | 0.539471468 |
| Ccdc18        | 24.01639345 | -0.835354042 | 0.463782197 | -1.801177466 | 0.071674913 | 0.115503726 |
| Trbj1-5       | 0.293490043 | -0.836287777 | 3.630836701 | -0.230329218 | 0.817835958 | NA          |
| Gbp4          | 159.1733799 | -0.836404905 | 0.39751981  | -2.104058422 | 0.035373351 | 0.062169576 |
| Fam117b       | 218.6590659 | -0.836449923 | 0.215437146 | -3.882570572 | 0.000103358 | 0.000311756 |
| Tcap          | 1.253106248 | -0.83670047  | 1.701857429 | -0.491639579 | 0.622974158 | NA          |
| Rin2          | 407.0661698 | -0.837114619 | 0.159340827 | -5.253610371 | 1.49E-07    | 6.72E-07    |
| Olfr372       | 0.691483509 | -0.837120087 | 2.383861699 | -0.351161348 | 0.725467306 | NA          |
| Sgsh          | 166.8953362 | -0.837269679 | 0.240595762 | -3.479985145 | 0.000501442 | 0.001340322 |
| Cgn           | 1576.25777  | -0.837317419 | 0.263350921 | -3.179474054 | 0.001475426 | 0.003593133 |
| Gm10217       | 0.274095315 | -0.837472876 | 3.635084117 | -0.230386106 | 0.817791756 | NA          |
| Gm21762       | 0.864854408 | -0.837705694 | 2.662314535 | -0.314653165 | 0.753025008 | NA          |
| Pafah1b2      | 668.6976465 | -0.838062511 | 0.218659028 | -3.83273683  | 0.000126726 | 0.000376248 |
| Vmn2r-ps54    | 1.058823089 | -0.838454732 | 2.282160767 | -0.367395121 | 0.71332431  | NA          |
| Gpx4-ps2      | 2.324893982 | -0.839725797 | 1.567266401 | -0.535790084 | 0.592103636 | 0.674880176 |



|            |             |              |             |              |                |             |
|------------|-------------|--------------|-------------|--------------|----------------|-------------|
| Prkcq      | 27.18180148 | -0.839906587 | 0.405094028 | -2.073362055 | 0.038138598    | 0.066562941 |
| Ankrd23    | 170.1819282 | -0.839920233 | 0.213015394 | -3.943002504 | 8.05E-05       | 0.000247352 |
| Mapk11     | 53.02789889 | -0.839933007 | 0.304003579 | -2.762904991 | 0.005728944    | 0.012303734 |
| Nefh       | 5.446364353 | -0.840482023 | 0.798995309 | -1.051923601 | 0.292834603    | 0.382079007 |
| Pus7l      | 45.44951874 | -0.840590936 | 0.327598859 | -2.565915331 | 0.010290394    | 0.020837468 |
| Olfr1265   | 1.848394442 | -0.840867852 | 1.590212461 | -0.528777049 | 0.596960121    | 0.679467434 |
| Gm7488     | 60.29378614 | -0.841111236 | 0.356075838 | -2.362168804 | 0.018168367    | 0.034522328 |
| Ptpn9      | 495.2301212 | -0.841290629 | 0.179622318 | -4.683664259 | 2.82E-06       | 1.07E-05    |
| Zfp668     | 96.66390489 | -0.84160107  | 0.26512258  | -3.174384731 | 0.001501545    | 0.003647527 |
| Ush1c      | 1.770748813 | -0.841615519 | 1.628495846 | -0.516805444 | 0.605291979    | 0.686835574 |
| Gm4131     | 1.238818547 | -0.841697368 | 2.096391383 | -0.4014982   | 0.688053363 NA |             |
| Ifngr2     | 441.9913556 | -0.841790047 | 0.21239452  | -3.963332232 | 7.39E-05       | 0.000228225 |
| Npm1       | 3625.764958 | -0.841791315 | 0.133054319 | -6.326674105 | 2.51E-10       | 1.56E-09    |
| Ccdc113    | 0.696205321 | -0.841825511 | 2.381614623 | -0.3534684   | 0.723737315 NA |             |
| Lmo7       | 539.9742985 | -0.842109325 | 0.21261127  | -3.960793449 | 7.47E-05       | 0.00023054  |
| Htra2      | 498.1750011 | -0.842148031 | 0.165376847 | -5.09229705  | 3.54E-07       | 1.51E-06    |
| Rnf227     | 6.914825438 | -0.842183926 | 0.747916883 | -1.126039464 | 0.260148815    | 0.345277436 |
| Tomm34     | 419.6493462 | -0.842431724 | 0.163713536 | -5.145767084 | 2.66E-07       | 1.16E-06    |
| Cfap74     | 50.82875535 | -0.843122172 | 0.401006787 | -2.102513472 | 0.035508321    | 0.062382392 |
| Chst15     | 223.3192994 | -0.843161784 | 0.32553807  | -2.590055852 | 0.009596036    | 0.019568567 |
| Serinc3    | 4561.486875 | -0.843481712 | 0.19208956  | -4.391085664 | 1.13E-05       | 3.95E-05    |
| Postn      | 179.1759246 | -0.843562815 | 0.350898706 | -2.404006626 | 0.016216479    | 0.031199474 |
| Prune1     | 471.5810628 | -0.843564083 | 0.17056638  | -4.94566445  | 7.59E-07       | 3.12E-06    |
| Brsk2      | 0.465375677 | -0.844020591 | 3.120946481 | -0.27043738  | 0.786823786 NA |             |
| A26c3      | 1.956410681 | -0.844117358 | 1.369043517 | -0.616574526 | 0.537515401    | 0.624688974 |
| Fam168b    | 1333.93239  | -0.844304133 | 0.174776985 | -4.830751218 | 1.36E-06       | 5.39E-06    |
| Smad7      | 285.4181351 | -0.84437756  | 0.286729446 | -2.944858198 | 0.003231027    | 0.00732286  |
| Itih2      | 29960.29081 | -0.844555479 | 0.224145628 | -3.767887362 | 0.000164635    | 0.00048027  |
| Fam117a    | 80.01976833 | -0.844672968 | 0.310207372 | -2.722930028 | 0.006470576    | 0.013720197 |
| Coq8b      | 500.5546016 | -0.844861299 | 0.162786193 | -5.19000588  | 2.10E-07       | 9.32E-07    |
| Gm21972    | 1.764152247 | -0.844899576 | 2.082010369 | -0.405809495 | 0.684882582    | 0.75552467  |
| Mypn       | 1.556626383 | -0.844913576 | 1.494003587 | -0.565536511 | 0.571708898 NA |             |
| Sptb       | 65.7380259  | -0.845323571 | 0.617784113 | -1.368315488 | 0.171213345    | 0.243299362 |
| Gm49405    | 142.9638913 | -0.84540676  | 0.274403288 | -3.080891505 | 0.002063818    | 0.004865714 |
| Jpt2       | 872.9378456 | -0.845609808 | 0.228574764 | -3.699488921 | 0.000216034    | 0.00061753  |
| Rabgap1    | 720.0173554 | -0.845624154 | 0.191161321 | -4.423615357 | 9.71E-06       | 3.44E-05    |
| Mmrn1      | 19.53074515 | -0.845962944 | 0.779682958 | -1.085008893 | 0.277917717    | 0.365159247 |
| Gbp6       | 488.8038604 | -0.846232308 | 0.37218487  | -2.273688094 | 0.022984747    | 0.042563976 |
| Maoa       | 335.1825009 | -0.84666696  | 0.336582116 | -2.515491937 | 0.01188664     | 0.023687134 |
| Zfp810     | 233.6696905 | -0.846753374 | 0.201395006 | -4.204440765 | 2.62E-05       | 8.66E-05    |
| Pak2       | 801.1896916 | -0.847234595 | 0.127294058 | -6.655727751 | 2.82E-11       | 1.96E-10    |
| Serpinb9   | 272.5329482 | -0.84895644  | 0.22398073  | -3.790310167 | 0.000150459    | 0.000441713 |
| Akp-ps1    | 0.272398003 | -0.8489853   | 3.563917498 | -0.238216878 | 0.811712887 NA |             |
| Rpl36-ps12 | 3.451535553 | -0.84939508  | 1.013616179 | -0.837984927 | 0.402039169    | 0.495146473 |
| Strada     | 128.9313118 | -0.849656545 | 0.224233285 | -3.78916334  | 0.000151156    | 0.000443452 |
| Mycbp2     | 883.3843402 | -0.849790772 | 0.161045583 | -5.276709585 | 1.32E-07       | 5.96E-07    |
| Gm7645     | 3.420796886 | -0.850149727 | 1.222688466 | -0.695311807 | 0.486859916    | 0.576799227 |
| Hmgb3      | 405.3156661 | -0.85019372  | 0.32381866  | -2.625524175 | 0.008651567    | 0.017834571 |
| Itpkc      | 189.3470427 | -0.850277042 | 0.244138887 | -3.482759552 | 0.000496274    | 0.001327759 |
| Cica4b     | 0.716121179 | -0.850407421 | 3.471550204 | -0.244964748 | 0.806483727 NA |             |
| Usp46      | 242.5814141 | -0.850546682 | 0.372719537 | -2.282001872 | 0.02248923     | 0.041727948 |
| Cyb5r1     | 404.4488596 | -0.851105723 | 0.222025286 | -3.833372938 | 0.000126398    | 0.000375371 |
| Slc16a1    | 1475.305487 | -0.851163007 | 0.253222667 | -3.361322337 | 0.000775702    | 0.001996705 |
| Dhx57      | 424.2398534 | -0.851346654 | 0.177464926 | -4.797267127 | 1.61E-06       | 6.30E-06    |
| Rps15a     | 3056.14293  | -0.851568891 | 0.176548237 | -4.823434686 | 1.41E-06       | 5.58E-06    |
| Rpa2       | 144.20774   | -0.851615987 | 0.323006074 | -2.636532426 | 0.008375819    | 0.01733225  |
| Ankmy1     | 2.97609681  | -0.851868302 | 1.323534804 | -0.643631206 | 0.519814609    | 0.608305839 |
| Tie1       | 278.1987337 | -0.851885215 | 0.221805412 | -3.840687237 | 0.00012269     | 0.00036484  |
| Trbj2-5    | 0.263743343 | -0.852989668 | 3.634217465 | -0.234710684 | 0.814433295 NA |             |
| Calhm6     | 34.28782921 | -0.853372087 | 0.571698335 | -1.49269647  | 0.135516658    | 0.199644658 |
| Gm13547    | 0.706214206 | -0.853484727 | 2.379278741 | -0.358715737 | 0.719807754 NA |             |
| Olfr704    | 2.870521732 | -0.853533513 | 1.150182377 | -0.742085369 | 0.458035614    | 0.548664358 |
| Gm11953    | 0.272176358 | -0.853822126 | 3.634034364 | -0.234951583 | 0.814246313 NA |             |
| Uck2       | 410.0381977 | -0.853932422 | 0.253863918 | -3.363740814 | 0.000768937    | 0.001981684 |
| Prdm11     | 91.84876338 | -0.854331322 | 0.333516821 | -2.561583909 | 0.010419607    | 0.021064088 |
| Rps4x      | 6753.083221 | -0.854407094 | 0.152331742 | -5.6088579   | 2.04E-08       | 1.02E-07    |

|               |             |              |             |              |                |             |
|---------------|-------------|--------------|-------------|--------------|----------------|-------------|
| Polr2d        | 127.7490569 | -0.854497103 | 0.228067892 | -3.74667865  | 0.000179191    | 0.000518651 |
| Cryba4        | 2.811370752 | -0.854787873 | 1.243134414 | -0.687606958 | 0.491700325    | 0.581593502 |
| Snx7          | 531.1640716 | -0.855010425 | 0.250205696 | -3.417230058 | 0.000632618    | 0.001659466 |
| Itpkb         | 158.1057332 | -0.85566594  | 0.193140595 | -4.43027495  | 9.41E-06       | 3.34E-05    |
| Rnf41         | 247.2939966 | -0.855722687 | 0.175317931 | -4.880976416 | 1.06E-06       | 4.25E-06    |
| Bend3         | 176.1242124 | -0.855915284 | 0.236608817 | -3.617427675 | 0.000297545    | 0.000826957 |
| Tmem181b-ps   | 34.42293458 | -0.856199888 | 0.353940573 | -2.419049845 | 0.015561108    | 0.030098226 |
| Tmem121b      | 0.272103063 | -0.856515825 | 3.634057935 | -0.235691296 | 0.813672224 NA |             |
| Rtp4          | 406.8570736 | -0.856573703 | 0.251193299 | -3.41001812  | 0.000649586    | 0.001699178 |
| Vmn1r51       | 0.272134945 | -0.856604247 | 3.63405788  | -0.235715631 | 0.81365334 NA  |             |
| Olfr809       | 0.272174954 | -0.856715196 | 3.634057811 | -0.235746166 | 0.813629644 NA |             |
| Olfr1338      | 0.272208938 | -0.856809426 | 3.634057753 | -0.235772099 | 0.813609519 NA |             |
| Zscan4-ps3    | 0.272272686 | -0.856986156 | 3.634057645 | -0.235820738 | 0.813571775 NA |             |
| Slc16a8       | 0.272389044 | -0.857308647 | 3.634057452 | -0.235909492 | 0.813502903 NA |             |
| Dkk2          | 14.470291   | -0.857389879 | 0.536092815 | -1.599331038 | 0.109747066    | 0.167214942 |
| Grn           | 3943.461118 | -0.857864775 | 0.178279989 | -4.811896053 | 1.50E-06       | 5.88E-06    |
| Apcs          | 2400.809456 | -0.857875167 | 0.298633486 | -2.872669028 | 0.004070203    | 0.009027949 |
| Slc4a8        | 13.98223768 | -0.85818096  | 0.593946984 | -1.444878049 | 0.148492143    | 0.215887264 |
| Rpl5-ps1      | 0.272853999 | -0.858595903 | 3.634056739 | -0.236263758 | 0.813228008 NA |             |
| H2-Eb2        | 2.569548403 | -0.859093083 | 1.262188856 | -0.680637512 | 0.496100885    | 0.585863666 |
| Dnntp1        | 467.6568436 | -0.859452193 | 0.173744132 | -4.946654506 | 7.55E-07       | 3.10E-06    |
| Manba         | 533.0584094 | -0.85947754  | 0.179447737 | -4.789570238 | 1.67E-06       | 6.54E-06    |
| Adgrl4        | 129.4545973 | -0.859635366 | 0.275633659 | -3.11876049  | 0.001816135    | 0.004330276 |
| Zyx           | 935.2706551 | -0.860270767 | 0.174654596 | -4.925554706 | 8.41E-07       | 3.43E-06    |
| Aldh1b1       | 1936.991179 | -0.860313338 | 0.271352847 | -3.170459969 | 0.001521978    | 0.003691376 |
| Gm4714        | 0.273503565 | -0.86039138  | 3.634055875 | -0.236757884 | 0.812844626 NA |             |
| 2310057M21Rik | 104.2373269 | -0.860544102 | 0.422348531 | -2.037521237 | 0.041597836    | 0.071835485 |
| Trio          | 998.8584298 | -0.860798644 | 0.196308552 | -4.384926873 | 1.16E-05       | 4.05E-05    |
| Hapln1        | 7.206916668 | -0.860933782 | 1.038132504 | -0.829310111 | 0.406928951    | 0.499339578 |
| Rbm12         | 205.8660947 | -0.861089486 | 0.33872757  | -2.542129908 | 0.011017921    | 0.022144957 |
| Lasp1         | 4097.630187 | -0.861199693 | 0.180240569 | -4.778056892 | 1.77E-06       | 6.90E-06    |
| Rpl21-ps1     | 0.273880703 | -0.861432145 | 3.634055446 | -0.237044304 | 0.81262242 NA  |             |
| Exog          | 52.27333715 | -0.862083787 | 0.343056131 | -2.512952577 | 0.011972543    | 0.023841597 |
| Gm5217        | 0.803579732 | -0.862420588 | 2.348783855 | -0.367177502 | 0.71348662 NA  |             |
| Ttc5          | 290.0279274 | -0.862841069 | 0.203081871 | -4.248735071 | 2.15E-05       | 7.21E-05    |
| Cstdc5        | 0.289531797 | -0.862987131 | 3.631347173 | -0.237649305 | 0.812153106 NA |             |
| Zfp808        | 13.42437798 | -0.863080466 | 0.716233524 | -1.205026625 | 0.228193024    | 0.310201313 |
| Zfp764        | 61.39261225 | -0.863326868 | 0.305371894 | -2.827132698 | 0.004696686    | 0.01026922  |
| Tnrc18        | 894.2286946 | -0.863480715 | 0.209857318 | -4.114608546 | 3.88E-05       | 0.000125082 |
| N4bp3         | 111.17167   | -0.863629152 | 0.244773438 | -3.528279691 | 0.00041827     | 0.001133471 |
| Gja4          | 54.43194252 | -0.864015986 | 0.416460551 | -2.074664654 | 0.038017625    | 0.066372194 |
| Gm45902       | 41.23393296 | -0.864020005 | 0.419741183 | -2.058458973 | 0.039546096    | 0.068723939 |
| Dop1b         | 1115.58609  | -0.86470691  | 0.312855189 | -2.763920625 | 0.005711143    | 0.012270141 |
| Gm15427       | 5.220060758 | -0.865091021 | 0.952025602 | -0.908684618 | 0.363516626    | 0.455913443 |
| A830018L16Rik | 12.50668361 | -0.865696542 | 0.875139809 | -0.989209419 | 0.322560691    | 0.413895428 |
| H2ax          | 324.9224163 | -0.866097891 | 0.336295821 | -2.575404853 | 0.010012282    | 0.020320164 |
| Myo10         | 902.7679707 | -0.866132016 | 0.159371922 | -5.434658797 | 5.49E-08       | 2.60E-07    |
| Ctnnd2        | 18.47040847 | -0.866327845 | 0.721209789 | -1.201214762 | 0.229667905    | 0.311882941 |
| Mnat1         | 175.1022361 | -0.866485779 | 0.190836098 | -4.540471043 | 5.61E-06       | 2.05E-05    |
| Olfr481       | 0.295408349 | -0.866747497 | 3.478387573 | -0.249180828 | 0.803220908 NA |             |
| Dph7          | 114.8348546 | -0.866780268 | 0.271475205 | -3.192852427 | 0.001408749    | 0.003449139 |
| Atp8b3        | 0.295429493 | -0.8668053   | 3.478327756 | -0.249201732 | 0.80320474 NA  |             |
| Olfr741       | 0.288240633 | -0.866920606 | 3.505379091 | -0.247311513 | 0.80466715 NA  |             |
| Zfp353-ps     | 0.295539722 | -0.867106682 | 3.478016118 | -0.249310714 | 0.803120444 NA |             |
| Gm8684        | 0.295551111 | -0.867137912 | 3.477983938 | -0.249322    | 0.803111715 NA |             |
| Gm18558       | 0.295616658 | -0.867317731 | 3.47798797  | -0.249386978 | 0.803061457 NA |             |
| Gm11892       | 0.288434736 | -0.867376507 | 3.504779404 | -0.247483909 | 0.804533743 NA |             |
| Gm8276        | 0.281959294 | -0.867564132 | 3.529750277 | -0.245786263 | 0.805847691 NA |             |
| Gm15901       | 0.288531706 | -0.867605096 | 3.504480299 | -0.247570259 | 0.804466924 NA |             |
| Gm17909       | 0.28854936  | -0.867646678 | 3.504425865 | -0.24758597  | 0.804454767 NA |             |
| Gm8581        | 0.288558805 | -0.867668928 | 3.504396746 | -0.247594377 | 0.804448262 NA |             |
| Gm15376       | 0.28863011  | -0.867836985 | 3.50417699  | -0.247657863 | 0.804399137 NA |             |
| Stab1         | 1474.29694  | -0.867930094 | 0.182027817 | -4.768117916 | 1.86E-06       | 7.22E-06    |
| Gm14580       | 0.288686813 | -0.867970719 | 3.504002342 | -0.247708373 | 0.804360053 NA |             |
| Gm29011       | 0.288692722 | -0.867984661 | 3.503984147 | -0.247713638 | 0.804355979 NA |             |
| Rsph1         | 5.109248819 | -0.868004388 | 1.099394976 | -0.789529157 | 0.429802795    | 0.521477337 |

|               |             |              |             |              |                |             |
|---------------|-------------|--------------|-------------|--------------|----------------|-------------|
| Ptpn22        | 59.75613284 | -0.868144881 | 0.316808468 | -2.740283068 | 0.006138629    | 0.013078149 |
| Wdr34         | 175.0769979 | -0.868374541 | 0.26625393  | -3.261452484 | 0.00110843     | 0.002772376 |
| Bcan          | 0.29602169  | -0.868444097 | 3.476661782 | -0.249792517 | 0.802747807 NA |             |
| Dzip3         | 87.14441053 | -0.868582807 | 0.400017511 | -2.17136196  | 0.029903822    | 0.053629324 |
| Gm11449       | 0.296173589 | -0.868846822 | 3.476230209 | -0.24993938  | 0.802634229 NA |             |
| Gm9320        | 0.296177591 | -0.868874443 | 3.476223976 | -0.249947773 | 0.802627738 NA |             |
| Nos3          | 92.1360837  | -0.868983198 | 0.283023688 | -3.070355008 | 0.002138045    | 0.005028889 |
| Rpl3l         | 0.834102835 | -0.869133056 | 2.360646868 | -0.368175803 | 0.712742152 NA |             |
| 1700017B05Rik | 311.5858224 | -0.869170617 | 0.287478288 | -3.023430473 | 0.002499265    | 0.005791418 |
| Zgrf1         | 37.42313896 | -0.869240932 | 0.431908641 | -2.012557401 | 0.044161212    | 0.075687177 |
| Kctd3         | 507.5174032 | -0.869686668 | 0.218670145 | -3.977162397 | 6.97E-05       | 0.000216137 |
| Mvp           | 1700.689701 | -0.86980261  | 0.211695573 | -4.108742566 | 3.98E-05       | 0.000128156 |
| Zfp40         | 98.79704206 | -0.869944508 | 0.235321625 | -3.696831977 | 0.000218307    | 0.000623086 |
| Gm20767       | 0.281977464 | -0.870365119 | 3.529933365 | -0.246567011 | 0.805243338 NA |             |
| Mcrip1        | 412.3253413 | -0.870694384 | 0.188029617 | -4.630623624 | 3.65E-06       | 1.37E-05    |
| Pwwp3a        | 381.2037552 | -0.871493617 | 0.202710342 | -4.29920648  | 1.71E-05       | 5.84E-05    |
| Snx8          | 323.0947631 | -0.871602775 | 0.210606023 | -4.138546288 | 3.50E-05       | 0.00011356  |
| Bbs2          | 116.8342628 | -0.871664203 | 0.36678163  | -2.376520879 | 0.017476772    | 0.033341989 |
| Cfap410       | 173.355851  | -0.871736309 | 0.255814728 | -3.407686165 | 0.00655162     | 0.001710444 |
| Arfgef3       | 2.50925151  | -0.87188326  | 1.336668144 | -0.65228102  | 0.514219902    | 0.60308344  |
| Reg3b         | 3.104970199 | -0.873052897 | 2.291363634 | -0.38101892  | 0.703189209    | 0.770237063 |
| Gm9918        | 0.689621417 | -0.873190241 | 2.855510926 | -0.305791245 | 0.759763595 NA |             |
| Prkg          | 17.88069825 | -0.873216734 | 0.574532916 | -1.51987242  | 0.128543043    | 0.191121734 |
| Gins1         | 111.2665927 | -0.873334733 | 0.306764671 | -2.846920832 | 0.004414434    | 0.00971563  |
| Ifi30         | 380.9227928 | -0.873788881 | 0.240155027 | -3.638436779 | 0.000274298    | 0.000768233 |
| Champ1        | 194.5171694 | -0.875361331 | 0.202282222 | -4.32742591  | 1.51E-05       | 5.18E-05    |
| Marveld2      | 403.9936356 | -0.876047335 | 0.161392402 | -5.428058089 | 5.70E-08       | 2.69E-07    |
| Sowahc        | 166.0256041 | -0.876756719 | 0.246777869 | -3.552817445 | 0.000381129    | 0.001040597 |
| Kif9          | 32.10969154 | -0.877084581 | 0.402861763 | -2.177135339 | 0.029470471    | 0.052935685 |
| H2bc21        | 93.97227649 | -0.877520222 | 0.336560795 | -2.60731563  | 0.00912552     | 0.018694048 |
| Gm48789       | 2.704504166 | -0.878265122 | 1.133854148 | -0.774583859 | 0.438585598    | 0.52994594  |
| Klhdc8b       | 793.9173111 | -0.878769931 | 0.232549674 | -3.778848254 | 0.000157555    | 0.000460642 |
| Mesd          | 561.7678832 | -0.878853591 | 0.245261648 | -3.583330691 | 0.000339241    | 0.000932802 |
| Hipk4         | 6.939174882 | -0.879520844 | 0.741603155 | -1.185972361 | 0.235633215    | 0.318539233 |
| Acot1         | 666.3889886 | -0.879942165 | 0.51119757  | -1.721334798 | 0.085190089    | 0.134548882 |
| Rpl36a-ps1    | 1.320941756 | -0.880581305 | 2.12109833  | -0.415153458 | 0.678029568 NA |             |
| 9630014M24Rik | 2.665257648 | -0.880669398 | 1.275454133 | -0.690475161 | 0.489895425    | 0.579740192 |
| Cyp19a1       | 3.871218577 | -0.880838975 | 0.991995342 | -0.887946684 | 0.374569431    | 0.466719753 |
| Itga1         | 670.75062   | -0.880850015 | 0.245233296 | -3.591885894 | 0.000328294    | 0.000905769 |
| Zcchc12       | 1.235275061 | -0.88091341  | 2.231452325 | -0.394771333 | 0.693011653 NA |             |
| Pgm21l        | 97.06616258 | -0.881234479 | 0.292065784 | -3.01724655  | 0.002550823    | 0.005898063 |
| Tgfa          | 619.058388  | -0.881340437 | 0.295025325 | -2.987338249 | 0.002814182    | 0.006453614 |
| Tcp11         | 0.378123879 | -0.881343592 | 3.627914782 | -0.242933929 | 0.808056581 NA |             |
| Cdc14a        | 47.60197987 | -0.882044279 | 0.383856186 | -2.297850895 | 0.021570277    | 0.040202261 |
| Hira          | 337.5749037 | -0.882075106 | 0.188877438 | -4.670092491 | 3.01E-06       | 1.14E-05    |
| Slc12a6       | 500.2100216 | -0.882639234 | 0.145447233 | -6.068449827 | 1.29E-09       | 7.43E-09    |
| Gad2          | 1.511842145 | -0.882857507 | 1.902580984 | -0.463993761 | 0.642652215 NA |             |
| Idh2          | 3508.159022 | -0.882864582 | 0.171749054 | -5.140433455 | 2.74E-07       | 1.19E-06    |
| Slc20a1       | 834.571265  | -0.883343431 | 0.251486795 | -3.512484349 | 0.000443938    | 0.001196373 |
| Hoxa7         | 2.214820927 | -0.884250737 | 1.487250896 | -0.594553844 | 0.55214174     | 0.637558412 |
| Cngb3         | 0.311596202 | -0.885441735 | 3.431921084 | -0.258001776 | 0.796405536 NA |             |
| Gm11954       | 0.305425668 | -0.885462373 | 3.449662077 | -0.256680902 | 0.797425116 NA |             |
| Tktl1         | 0.31165634  | -0.885467197 | 3.431759297 | -0.258021359 | 0.796390423 NA |             |
| Gm42935       | 0.29615335  | -0.885484894 | 3.633829514 | -0.243678161 | 0.807480088 NA |             |
| Irgc1         | 0.311713446 | -0.885491471 | 3.431605743 | -0.258039978 | 0.796376054 NA |             |
| 4933409K07Rik | 0.311716572 | -0.885492802 | 3.43159734  | -0.258040998 | 0.796375266 NA |             |
| Gm21093       | 0.311716572 | -0.885492802 | 3.43159734  | -0.258040998 | 0.796375266 NA |             |
| Rps19-ps7     | 0.305517739 | -0.88553315  | 3.449582418 | -0.256707347 | 0.79740407 NA  |             |
| Gm12738       | 0.305502792 | -0.885555236 | 3.449805006 | -0.256697186 | 0.797412544 NA |             |
| Mrto4-ps2     | 0.305496936 | -0.885555858 | 3.449842376 | -0.256694585 | 0.797414552 NA |             |
| Olfr1444      | 0.305405946 | -0.885567102 | 3.450322597 | -0.256662117 | 0.797439618 NA |             |
| Bapbc2        | 0.305369983 | -0.88557017  | 3.45043672  | -0.256654517 | 0.797445486 NA |             |
| Gm11599       | 0.31192776  | -0.885583408 | 3.431030151 | -0.258110063 | 0.796321966 NA |             |
| Trgv3         | 0.312134514 | -0.885700429 | 3.430485047 | -0.258185189 | 0.796263988 NA |             |
| Dsg3          | 0.298150142 | -0.885767668 | 3.473647931 | -0.254996386 | 0.798725891 NA |             |
| Gm12176       | 0.298211379 | -0.885775645 | 3.473450051 | -0.255013209 | 0.798712897 NA |             |

|          |             |              |             |              |             |    |             |
|----------|-------------|--------------|-------------|--------------|-------------|----|-------------|
| Lcn4     | 0.298224822 | -0.885777312 | 3.473406598 | -0.255016879 | 0.798710062 | NA |             |
| Gm15946  | 0.312521231 | -0.885846917 | 3.429442514 | -0.25830639  | 0.796170455 | NA |             |
| Inpp4b   | 33.59506767 | -0.886362093 | 0.671355031 | -1.320258362 | 0.186748772 |    | 0.261903017 |
| Gm13740  | 0.289373628 | -0.886452974 | 3.63352464  | -0.243965037 | 0.807257898 | NA |             |
| Gm8702   | 0.290047943 | -0.886592438 | 3.633485509 | -0.244006048 | 0.807226136 | NA |             |
| Gm12859  | 0.290231116 | -0.886630786 | 3.633474918 | -0.244017313 | 0.807217411 | NA |             |
| Gdf7     | 0.302750503 | -0.886680775 | 3.63346121  | -0.244031992 | 0.807206043 | NA |             |
| Cort     | 0.291042444 | -0.886802886 | 3.63342823  | -0.244067814 | 0.807178299 | NA |             |
| Cdhr3    | 0.291780512 | -0.886962667 | 3.633386048 | -0.244114623 | 0.807142047 | NA |             |
| Olfr876  | 0.291821021 | -0.886971524 | 3.633383741 | -0.244117216 | 0.807140039 | NA |             |
| Muc5ac   | 0.291892186 | -0.886987106 | 3.63337969  | -0.244121777 | 0.807136507 | NA |             |
| Olfr348  | 0.318894091 | -0.887029227 | 3.633368775 | -0.244134103 | 0.807126961 | NA |             |
| Psg25    | 0.318915952 | -0.887033474 | 3.633367679 | -0.244135346 | 0.807125999 | NA |             |
| Olfr17   | 0.3044876   | -0.887033788 | 3.633367605 | -0.244135437 | 0.807125928 | NA |             |
| Nupl1    | 0.304490632 | -0.887034417 | 3.633367443 | -0.244135621 | 0.807125786 | NA |             |
| Mcidas   | 0.318972912 | -0.887044551 | 3.633364826 | -0.244138586 | 0.807123489 | NA |             |
| Tex14    | 3.07129201  | -0.887048647 | 1.538380631 | -0.576611944 | 0.564201629 |    | 0.648715814 |
| Gm12794  | 0.319137121 | -0.887076564 | 3.633356606 | -0.244147949 | 0.807116238 | NA |             |
| Gm4575   | 0.319346609 | -0.887117571 | 3.633346135 | -0.244159939 | 0.807106952 | NA |             |
| Ankr7    | 0.304897522 | -0.887119262 | 3.633345711 | -0.244160433 | 0.80710657  | NA |             |
| Gkn3     | 0.319472948 | -0.887142392 | 3.633339827 | -0.244167194 | 0.807101333 | NA |             |
| Gm5269   | 0.319605233 | -0.887168455 | 3.63333323  | -0.244174811 | 0.807095435 | NA |             |
| Ltbp4    | 872.9562743 | -0.887242531 | 0.281855086 | -3.147867731 | 0.001644661 |    | 0.003965796 |
| Gm12494  | 0.320119643 | -0.887270507 | 3.633307636 | -0.244204619 | 0.80707235  | NA |             |
| Gm13711  | 0.320334358 | -0.887313434 | 3.633296982 | -0.24421715  | 0.807062645 | NA |             |
| Igkv4-73 | 0.320470286 | -0.887340709 | 3.633290246 | -0.24422511  | 0.807056481 | NA |             |
| Spred1   | 392.0778789 | -0.887355535 | 0.252512952 | -3.514099092 | 0.000441248 |    | 0.0011895   |
| Thra     | 346.7765622 | -0.887371917 | 0.204538297 | -4.338414508 | 1.44E-05    |    | 4.94E-05    |
| Gm5808   | 0.306098807 | -0.887374402 | 3.633281968 | -0.24423494  | 0.807048868 | NA |             |
| Myadml2  | 0.306110498 | -0.887376919 | 3.63328135  | -0.244235674 | 0.8070483   | NA |             |
| Gm43471  | 0.30613373  | -0.887381922 | 3.633280124 | -0.244237133 | 0.807047169 | NA |             |
| Gm49298  | 0.306185625 | -0.887393107 | 3.633277385 | -0.244240396 | 0.807044643 | NA |             |
| Gm3745   | 0.306405984 | -0.887440743 | 3.633265767 | -0.244254288 | 0.807033884 | NA |             |
| Trav12-1 | 0.327363555 | -0.887580162 | 3.386316999 | -0.262107819 | 0.793238319 | NA |             |
| Clasp1   | 451.9344489 | -0.887753001 | 0.210256447 | -4.222239151 | 2.42E-05    |    | 8.06E-05    |
| Cd300e   | 12.14758281 | -0.888116325 | 1.015469656 | -0.874586769 | 0.381798789 |    | 0.4738311   |
| Sh3bgr   | 2.989767679 | -0.888202534 | 1.17557355  | -0.755548246 | 0.449920095 |    | 0.541033913 |
| Dapk2    | 227.5306852 | -0.88851172  | 0.254091131 | -3.49682304  | 0.000470834 |    | 0.00126406  |
| Klh4     | 9.690007144 | -0.888565766 | 0.725695697 | -1.224433009 | 0.220788923 |    | 0.301579165 |
| Mmp25    | 8.689867964 | -0.889282951 | 0.808178266 | -1.100354944 | 0.271177501 |    | 0.357736907 |
| Wif1     | 1.935102495 | -0.889379734 | 1.530199276 | -0.581218242 | 0.561093374 |    | 0.646134137 |
| Ndst1    | 1826.916891 | -0.889447173 | 0.263491835 | -3.375615694 | 0.000736507 |    | 0.001904281 |
| Htr2a    | 1.53257346  | -0.889481075 | 1.864765735 | -0.476993468 | 0.633366773 | NA |             |
| Pbx1     | 453.8761454 | -0.889575808 | 0.173119413 | -5.138509859 | 2.77E-07    |    | 1.20E-06    |
| Snrbp    | 1152.591895 | -0.890077684 | 0.194336813 | -4.580077598 | 4.65E-06    |    | 1.72E-05    |
| Cd274    | 93.79651053 | -0.890306985 | 0.268264991 | -3.318759497 | 0.000904183 |    | 0.002302047 |
| Brd8dc   | 10.8115437  | -0.89249174  | 0.63269311  | -1.410623453 | 0.158355672 |    | 0.227818355 |
| Pacs2    | 602.7498334 | -0.892953217 | 0.164705734 | -5.421506569 | 5.91E-08    |    | 2.78E-07    |
| Nrxn3    | 5.001575756 | -0.893035554 | 0.950796893 | -0.939249551 | 0.347602634 |    | 0.44013144  |
| Nbeal2   | 328.6219254 | -0.893720154 | 0.263702953 | -3.389116977 | 0.000701181 |    | 0.001818888 |
| Caprin2  | 118.0208949 | -0.89375145  | 0.332379351 | -2.688949986 | 0.007167716 |    | 0.015061656 |
| Zswim3   | 48.63126948 | -0.893829395 | 0.419060095 | -2.132938463 | 0.032929775 |    | 0.058471701 |
| Adora1   | 664.0693923 | -0.89384292  | 0.222354426 | -4.019901629 | 5.82E-05    |    | 0.000182526 |
| Morn5    | 1.523137267 | -0.893912639 | 1.843136405 | -0.484995379 | 0.627679624 | NA |             |
| Rasip1   | 143.0550934 | -0.894088627 | 0.242761109 | -3.682997777 | 0.000230507 |    | 0.000654948 |
| Gm12879  | 0.738655527 | -0.894437574 | 2.886941168 | -0.309821892 | 0.756696403 | NA |             |
| Smad6    | 116.0562039 | -0.894524545 | 0.348508519 | -2.566722179 | 0.010266483 |    | 0.020803875 |
| Tpsab1   | 0.309560513 | -0.894709425 | 3.630568239 | -0.246437848 | 0.805343311 | NA |             |
| Upp1     | 48.66467153 | -0.895293908 | 0.411064123 | -2.177990873 | 0.029406716 |    | 0.0528323   |
| Ptpra    | 872.9872397 | -0.895321378 | 0.199228238 | -4.493948175 | 6.99E-06    |    | 2.53E-05    |
| Cxcl1    | 762.7387501 | -0.895455374 | 0.49225053  | -1.819104946 | 0.068895421 |    | 0.111636644 |
| Gm12573  | 5.12143912  | -0.895948452 | 1.091979225 | -0.820481225 | 0.411941828 |    | 0.504112001 |
| Cenpw    | 125.2480313 | -0.896134389 | 0.360218893 | -2.487749551 | 0.012855423 |    | 0.025359783 |
| Akt1     | 1437.867785 | -0.896222067 | 0.147215089 | -6.087841096 | 1.14E-09    |    | 6.63E-09    |
| Frmppd3  | 3.248899927 | -0.896454436 | 1.166651412 | -0.768399564 | 0.44224984  |    | 0.533352806 |
| Phf19    | 19.75686792 | -0.896484649 | 0.585817303 | -1.530314392 | 0.125938928 |    | 0.187839618 |

|               |             |              |             |              |                |             |
|---------------|-------------|--------------|-------------|--------------|----------------|-------------|
| Kctd5         | 167.1510619 | -0.896910477 | 0.232541239 | -3.856995354 | 0.000114789    | 0.000343562 |
| Nudt11        | 2.60722414  | -0.897522212 | 1.480964012 | -0.606039178 | 0.544488738    | 0.630986609 |
| B3glct        | 71.14287637 | -0.89772714  | 0.371439492 | -2.416886625 | 0.015653892    | 0.03025493  |
| Vps37c        | 382.6764877 | -0.898032156 | 0.225664922 | -3.979493793 | 6.91E-05       | 0.000214145 |
| Ext1          | 1103.972267 | -0.898067588 | 0.192979239 | -4.653700536 | 3.26E-06       | 1.23E-05    |
| Sntg1         | 8.502457303 | -0.898566411 | 0.967206832 | -0.929032324 | 0.352872335    | 0.445249616 |
| Castor1       | 32.79134872 | -0.898939556 | 0.370239215 | -2.427996602 | 0.015182486    | 0.029422646 |
| Parp14        | 756.5413123 | -0.899019986 | 0.24558199  | -3.660773273 | 0.000251455    | 0.000708915 |
| Lbr           | 326.3633894 | -0.899538504 | 0.207017962 | -4.3452196   | 1.39E-05       | 4.80E-05    |
| Psap          | 11319.49442 | -0.899554876 | 0.15212586  | -5.913227874 | 3.35E-09       | 1.84E-08    |
| S100a14       | 3.850618644 | -0.900517097 | 1.103666373 | -0.81593235  | 0.414538829    | 0.50674444  |
| Matk          | 421.2298945 | -0.900787405 | 0.279126283 | -3.227167987 | 0.00125022     | 0.00309523  |
| Cstb          | 929.4159954 | -0.900940862 | 0.192484722 | -4.680583742 | 2.86E-06       | 1.09E-05    |
| Fbxl8         | 68.08095657 | -0.901017851 | 0.262416326 | -3.433543424 | 0.000595747    | 0.001569994 |
| Olfr896-ps1   | 0.829246326 | -0.901820004 | 1.915286007 | -0.470853962 | 0.637745026 NA |             |
| Olfr822       | 1.536256776 | -0.901983054 | 1.683323945 | -0.535834506 | 0.592072932 NA |             |
| Actn4         | 4732.734095 | -0.90211843  | 0.16493573  | -5.469514894 | 4.51E-08       | 2.15E-07    |
| 4930590J08Rik | 5.072861469 | -0.902201398 | 0.866117033 | -1.041662228 | 0.297568307    | 0.387099924 |
| Sifnl1        | 0.824994807 | -0.902408105 | 2.346671647 | -0.384548092 | 0.700572258 NA |             |
| Kcnmb1        | 11.5320043  | -0.902709841 | 0.654779    | -1.378648125 | 0.168003271    | 0.239414843 |
| Tiparp        | 121.5487389 | -0.903889254 | 0.306307242 | -2.950923553 | 0.003168253    | 0.007196853 |
| Trgc2         | 6.706300787 | -0.904062089 | 0.830507395 | -1.088565971 | 0.27634533     | 0.363345302 |
| Zfp282        | 205.4652394 | -0.904385041 | 0.206119479 | -4.38767382  | 1.15E-05       | 4.00E-05    |
| Prosl         | 1673.677917 | -0.904695367 | 0.208710424 | -4.334691823 | 1.46E-05       | 5.02E-05    |
| Zfp316        | 124.0275681 | -0.904913042 | 0.239711303 | -3.775011983 | 0.00016        | 0.000467389 |
| Fam114a1      | 805.2053847 | -0.904964047 | 0.184476724 | -4.905573057 | 9.32E-07       | 3.78E-06    |
| Cd3d          | 21.82025554 | -0.905079155 | 0.516569891 | -1.752094288 | 0.079757596    | 0.126862055 |
| Fat1          | 1132.325125 | -0.905948996 | 0.288052677 | -3.14508098  | 0.001660409    | 0.003995856 |
| Dcp2          | 331.1252026 | -0.907355621 | 0.265732916 | -3.414539816 | 0.000638899    | 0.001674395 |
| Fam167a       | 16.21571827 | -0.907677988 | 0.698340818 | -1.299763618 | 0.193681999    | 0.269872555 |
| Btbd11        | 15.29172119 | -0.907721478 | 0.598409158 | -1.516891019 | 0.129294201    | 0.192071065 |
| Slco4a1       | 6.980521064 | -0.90789398  | 0.939143071 | -0.966725953 | 0.333681049    | 0.425793004 |
| Ms4a4d        | 113.981139  | -0.908319071 | 0.339874379 | -2.672514101 | 0.007528521    | 0.015746071 |
| P2rx6         | 2.083465404 | -0.909138525 | 1.454900354 | -0.624880269 | 0.532049643    | 0.619730959 |
| Sipa1l2       | 114.6026873 | -0.90916025  | 0.303472571 | -2.995856418 | 0.002736753    | 0.006290435 |
| Gm9877        | 2.842268495 | -0.909986682 | 1.328581125 | -0.684931213 | 0.493387328    | 0.583305629 |
| Gm19345       | 4.832287593 | -0.910161619 | 0.937198616 | -0.971151262 | 0.33147296     | 0.423704807 |
| Ppp4r1        | 519.8343748 | -0.910326522 | 0.296776556 | -3.067380167 | 0.00215944     | 0.005076412 |
| Matr3         | 91.55509788 | -0.910408802 | 0.442476928 | -2.057528301 | 0.039635435    | 0.068858138 |
| Cirg1         | 1501.092911 | -0.910772287 | 0.153515673 | -5.932764202 | 2.98E-09       | 1.64E-08    |
| Gm15922       | 14.15065356 | -0.910809969 | 0.806565795 | -1.129244476 | 0.258794717    | 0.343742293 |
| Ajm1          | 2.25047707  | -0.911122906 | 1.416586475 | -0.643181989 | 0.520106019    | 0.608563309 |
| Nfkb1         | 704.6828937 | -0.911311488 | 0.193269161 | -4.715245235 | 2.41E-06       | 9.23E-06    |
| Stx7          | 629.8335409 | -0.911785935 | 0.154734321 | -5.892590126 | 3.80E-09       | 2.07E-08    |
| Crip2         | 1432.025185 | -0.911846082 | 0.179710898 | -5.073960979 | 3.90E-07       | 1.66E-06    |
| Ccdc50-ps     | 0.820890554 | -0.912419475 | 2.317898826 | -0.393640768 | 0.693846278 NA |             |
| Mtus2         | 46.69904507 | -0.912424611 | 0.549400323 | -1.660764607 | 0.096760732    | 0.150125315 |
| Cldnd2        | 2.004555386 | -0.913177082 | 1.780326224 | -0.512926827 | 0.608002507    | 0.689131489 |
| Nyap1         | 11.26688818 | -0.913332054 | 0.782810952 | -1.166733873 | 0.243317859    | 0.326955376 |
| Gm45713       | 12.11995689 | -0.913502581 | 1.184533784 | -0.771191665 | 0.440593334    | 0.531872874 |
| Tipin         | 116.8531309 | -0.913526376 | 0.310368822 | -2.943357426 | 0.003246733    | 0.007354546 |
| Six5          | 142.8092148 | -0.913974746 | 0.255229399 | -3.580993221 | 0.000342291    | 0.000940582 |
| A730071L15Rik | 2.152093632 | -0.91436287  | 1.440295202 | -0.634844072 | 0.525530117    | 0.613646399 |
| Zfp641        | 19.57919262 | -0.914393307 | 0.464269748 | -1.96953024  | 0.048892234    | 0.082796742 |
| Phf13         | 151.6830022 | -0.915666768 | 0.261875519 | -3.496572609 | 0.000471276    | 0.001265048 |
| H2-T24        | 55.5740582  | -0.915668229 | 0.325150559 | -2.816136105 | 0.004860507    | 0.010593445 |
| Kctd13        | 143.3635286 | -0.915968102 | 0.232145021 | -3.945671967 | 7.96E-05       | 0.000244745 |
| Kcnq5         | 1.148706993 | -0.91652957  | 1.857715186 | -0.493363879 | 0.6217555 NA   |             |
| Mfsd4a        | 6.720668425 | -0.916760233 | 0.71279743  | -1.286144132 | 0.198392764    | 0.275320095 |
| Reg3g         | 0.758682216 | -0.916909583 | 2.435773938 | -0.376434598 | 0.706593829 NA |             |
| C2cd5         | 219.362452  | -0.916943862 | 0.217548259 | -4.214898654 | 2.50E-05       | 8.30E-05    |
| Idua          | 204.8085157 | -0.917545696 | 0.279401814 | -3.283964706 | 0.001023577    | 0.002575638 |
| 2700054A10Rik | 39.17903966 | -0.91808151  | 0.526273328 | -1.74449561  | 0.081072706    | 0.12871368  |
| Scn4a         | 0.750302369 | -0.918629041 | 2.112700279 | -0.434812761 | 0.663698342 NA |             |
| Zbtb4         | 403.6228728 | -0.91903358  | 0.167826479 | -5.476094033 | 4.35E-08       | 2.08E-07    |
| Arhgap36      | 3.171415385 | -0.919249723 | 1.306312593 | -0.703698126 | 0.481620788    | 0.571893236 |



|               |             |              |             |              |                |             |
|---------------|-------------|--------------|-------------|--------------|----------------|-------------|
| Trdc          | 11.03615035 | -0.9194991   | 0.765356242 | -1.201400146 | 0.22959602     | 0.31181016  |
| Pecam1        | 456.6234105 | -0.919525738 | 0.160177137 | -5.740680318 | 9.43E-09       | 4.91E-08    |
| Hpd1          | 5.593247014 | -0.919549206 | 0.845413578 | -1.087691551 | 0.276731299    | 0.363824723 |
| 5530401A14Rik | 1.369654937 | -0.919614349 | 1.756862506 | -0.523441275 | 0.600667208 NA |             |
| Med22         | 560.7584048 | -0.919805855 | 0.190704463 | -4.823200457 | 1.41E-06       | 5.59E-06    |
| Fndc7         | 4.002466322 | -0.919934288 | 1.088710796 | -0.844975811 | 0.398124345    | 0.490891126 |
| Crif2         | 208.52844   | -0.921037091 | 0.324669124 | -2.836848419 | 0.004556124    | 0.009992641 |
| Igsf10        | 31.83394818 | -0.92131612  | 0.452313333 | -2.036897992 | 0.041660265    | 0.071908091 |
| Klhdc8a       | 65.19831662 | -0.921917369 | 0.470648273 | -1.958824503 | 0.050133343    | 0.084570872 |
| Nras          | 663.6912113 | -0.922027604 | 0.210755185 | -4.374875068 | 1.22E-05       | 4.23E-05    |
| Unc13a        | 17.38445383 | -0.92284998  | 0.998049418 | -0.924653593 | 0.355146126    | 0.447588612 |
| Pgap3         | 93.95154632 | -0.923100881 | 0.301683929 | -3.059827825 | 0.002214643    | 0.005193291 |
| Gm8220        | 0.407873321 | -0.923245453 | 3.629889306 | -0.254345346 | 0.79922877 NA  |             |
| Func2         | 198.9590554 | -0.923279806 | 0.231849168 | -3.982243345 | 6.83E-05       | 0.000211952 |
| Cdkn2d        | 66.1509342  | -0.92353171  | 0.293752312 | -3.143912991 | 0.00166705     | 0.004010707 |
| Lca5l         | 6.475397977 | -0.923898624 | 0.931520151 | -0.991818183 | 0.321286226    | 0.412694965 |
| Tmem88        | 43.31828709 | -0.924657657 | 0.397771013 | -2.324597891 | 0.020093472    | 0.03773474  |
| Gm3355        | 0.765107851 | -0.924669179 | 2.434858626 | -0.379762985 | 0.704121361 NA |             |
| Vangl1        | 209.8910604 | -0.925020165 | 0.254446494 | -3.635421141 | 0.000277527    | 0.000776256 |
| Asb7          | 263.8360491 | -0.925881921 | 0.214099632 | -4.324537664 | 1.53E-05       | 5.24E-05    |
| Hmcn1         | 34.62118398 | -0.926657305 | 0.67071375  | -1.381598788 | 0.167094926    | 0.238359493 |
| Stxbp4        | 102.7983976 | -0.927183737 | 0.251211252 | -3.690852739 | 0.000223504    | 0.000636321 |
| S1pr3         | 53.45508355 | -0.927399406 | 0.439071343 | -2.112183868 | 0.034670682    | 0.06112998  |
| 4930516K23Rik | 2.588431786 | -0.927748421 | 1.420454238 | -0.65313503  | 0.513669231    | 0.602561966 |
| Coprs         | 97.56830619 | -0.928069323 | 0.240261911 | -3.862740117 | 0.000112122    | 0.00033617  |
| Ttbk1         | 44.23732183 | -0.928751544 | 0.424211636 | -2.189358956 | 0.02857076     | 0.051553167 |
| Gbp3          | 157.0899143 | -0.929115872 | 0.396525652 | -2.343141904 | 0.019122109    | 0.036121187 |
| Gpr107        | 552.9676037 | -0.929805755 | 0.212351153 | -4.378623537 | 1.19E-05       | 4.16E-05    |
| Wdr1          | 1311.17066  | -0.930066085 | 0.189090789 | -4.918621857 | 8.72E-07       | 3.55E-06    |
| Zfp280b       | 285.6580616 | -0.930790671 | 0.242017793 | -3.845959673 | 0.000120082    | 0.000357768 |
| Gspt2         | 23.71226951 | -0.931121933 | 0.490387965 | -1.898745483 | 0.057597948    | 0.095332993 |
| Gm11110       | 3.034022628 | -0.931499676 | 1.224958651 | -0.760433567 | 0.446995465    | 0.538162337 |
| Slc39a13      | 464.2289901 | -0.931532855 | 0.238656652 | -3.9032344   | 9.49E-05       | 0.000288179 |
| Esam          | 197.9851392 | -0.931538187 | 0.22814684  | -4.083064162 | 4.44E-05       | 0.000142026 |
| Dnajc9        | 187.9670711 | -0.931611658 | 0.252182105 | -3.694202082 | 0.000220578    | 0.000629148 |
| Arid1b        | 735.111443  | -0.93164252  | 0.209651251 | -4.443772766 | 8.84E-06       | 3.15E-05    |
| Gm17119       | 0.721705931 | -0.93164894  | 2.412925097 | -0.386107692 | 0.699416914 NA |             |
| Olfr1443      | 1.950517172 | -0.931653881 | 1.568943419 | -0.593809738 | 0.552639375    | 0.63800339  |
| Pacsin2       | 1868.384587 | -0.931987419 | 0.237548944 | -3.923349034 | 8.73E-05       | 0.000266895 |
| Slc30a4       | 342.0504507 | -0.932030008 | 0.231674444 | -4.023016048 | 5.75E-05       | 0.000180194 |
| Xrcc2         | 39.25388814 | -0.932043317 | 0.370298792 | -2.517003395 | 0.011835769    | 0.023602315 |
| Dlg5          | 228.3076136 | -0.932582383 | 0.268033926 | -3.479344556 | 0.000502642    | 0.00134332  |
| Minar2        | 0.358858983 | -0.932593521 | 3.323645968 | -0.28059352  | 0.779022187 NA |             |
| Gm49376       | 4.3640289   | -0.932644435 | 0.95055946  | -0.981153178 | 0.32651721     | 0.418122541 |
| Lats2         | 473.3183561 | -0.933014316 | 0.222871456 | -4.186333836 | 2.83E-05       | 9.33E-05    |
| Ramp1         | 82.81716347 | -0.933385005 | 0.249979164 | -3.733851211 | 0.000188574    | 0.000544421 |
| Spr2b         | 0.766406082 | -0.93341423  | 2.46854937  | -0.378122569 | 0.705339543 NA |             |
| Gm49141       | 3.850839664 | -0.934417282 | 1.188630788 | -0.786129125 | 0.431791843    | 0.523257559 |
| Hspbp1        | 137.1227514 | -0.934439175 | 0.246399973 | -3.792367203 | 0.000149218    | 0.000438296 |
| Gm6545        | 18.94601262 | -0.934597186 | 0.618747928 | -1.510465156 | 0.130924774    | 0.194104317 |
| Nudt19        | 1523.45789  | -0.935045822 | 0.32568028  | -2.871054461 | 0.00409105     | 0.00907065  |
| Bak1          | 349.3831981 | -0.93537012  | 0.163275702 | -5.728777208 | 1.01E-08       | 5.25E-08    |
| Cep152        | 112.4989598 | -0.935689253 | 0.215640482 | -4.339116865 | 1.43E-05       | 4.93E-05    |
| Trip10        | 375.275058  | -0.93619001  | 0.284902986 | -3.285995777 | 0.001016225    | 0.002559405 |
| Thns1         | 97.40275842 | -0.936560392 | 0.272273127 | -3.439782696 | 0.000582181    | 0.001538526 |
| Hs2st1        | 347.3577512 | -0.936849583 | 0.184165856 | -5.086988464 | 3.64E-07       | 1.55E-06    |
| Specc1l       | 546.423384  | -0.937112183 | 0.142085534 | -6.595408804 | 4.24E-11       | 2.89E-10    |
| Rpl10a        | 3262.691148 | -0.937331478 | 0.169541433 | -5.528627788 | 3.23E-08       | 1.57E-07    |
| Foxh1         | 0.735001055 | -0.938115229 | 2.439836878 | -0.38449916  | 0.700608519 NA |             |
| Gm12208       | 2.653190803 | -0.938386625 | 1.281398513 | -0.732314432 | 0.463976672    | 0.554534094 |
| Lmln          | 67.09697232 | -0.938793668 | 0.316355723 | -2.96752548  | 0.003002074    | 0.006849486 |
| Gstm3         | 3495.910929 | -0.939551297 | 0.927064288 | -1.013469411 | 0.310836       | 0.401601525 |
| Sox18         | 117.4067233 | -0.939752281 | 0.309626236 | -3.035118384 | 0.002404413    | 0.005593672 |
| Gyg           | 213.1825228 | -0.939809662 | 0.165613631 | -5.674712015 | 1.39E-08       | 7.07E-08    |
| Dnajb3        | 0.274261454 | -0.940117369 | 3.632230822 | -0.258826439 | 0.795769158 NA |             |
| Gm10800       | 0.274261454 | -0.940117369 | 3.632230822 | -0.258826439 | 0.795769158 NA |             |

|               |             |              |              |              |              |          |             |
|---------------|-------------|--------------|--------------|--------------|--------------|----------|-------------|
| lapp          | 0.274261454 | -0.940117369 | 3.632230822  | -0.258826439 | 0.795769158  | NA       |             |
| Fabp6         | 0.274261454 | -0.940117369 | 3.632230822  | -0.258826439 | 0.795769158  | NA       |             |
| Gm7701        | 0.274261454 | -0.940117369 | 3.632230822  | -0.258826439 | 0.795769158  | NA       |             |
| Gnb3          | 0.274261454 | -0.940117369 | 3.632230822  | -0.258826439 | 0.795769158  | NA       |             |
| Phxr2         | 0.274261454 | -0.940117369 | 3.632230822  | -0.258826439 | 0.795769158  | NA       |             |
| Trav10        | 0.274261454 | -0.940117369 | 3.632230822  | -0.258826439 | 0.795769158  | NA       |             |
| Kmt5a         | 1002.298938 | -0.940256288 | 0.177322216  | -5.302529533 | 1.14E-07     |          | 5.21E-07    |
| Gm7198        | 0.761644857 | -0.94030491  | 2.829253417  | -0.332350897 | 0.739624312  | NA       |             |
| Tmem200b      | 29.16433903 | -0.940581899 | 0.604439627  | -1.556122163 | 0.119679046  |          | 0.179983096 |
| Tnip2         | 215.1998834 | -0.940656745 | 0.231870834  | -4.056813567 | 4.97E-05     |          | 0.000157666 |
| 1700057G04Rik | 2.016747975 | -0.941411422 | 1.620733671  | -0.580855102 | 0.561338114  |          | 0.646251497 |
| Msto1         | 241.7906947 | -0.941799271 | 0.247463663  | -3.805808337 | 0.000141342  |          | 0.000416741 |
| Stoml1        | 166.6908226 | -0.942056241 | 0.17703968   | -5.321158744 | 1.03E-07     |          | 4.73E-07    |
| Tbx2          | 138.4170071 | -0.943194368 | 0.224087319  | -4.209048383 | 2.56E-05     |          | 8.50E-05    |
| Jak3          | 397.9098648 | -0.943249155 | 0.186952418  | -5.045396938 | 4.53E-07     |          | 1.91E-06    |
| Trp53bp2      | 682.189373  | -0.94327165  | 0.199071988  | -4.738344443 | 2.15E-06     |          | 8.30E-06    |
| Nod1          | 339.5750171 | -0.943540357 | 0.190866309  | -4.943462057 | 7.67E-07     |          | 3.15E-06    |
| Gm20605       | 472.7495025 | -0.944012349 | 0.219661193  | -4.297583645 | 1.73E-05     |          | 5.87E-05    |
| Slc35g1       | 748.4727604 | -0.944184137 | 0.32139467   | -2.937771613 | 0.003305805  |          | 0.007481396 |
| Rad9a         | 133.3150917 | -0.944556262 | 0.221404154  | -4.266208398 | 1.99E-05     |          | 6.70E-05    |
| Gadl1         | 0.710687536 | -0.944686604 | 2.380411415  | -0.396858542 | 0.691471777  | NA       |             |
| Plekhg5       | 211.124618  | -0.945023955 | 0.228255614  | -4.140200282 | 3.47E-05     |          | 0.000112787 |
| Smad2         | 302.2119613 | -0.945493448 | 0.209740492  | -4.507920421 | 6.55E-06     |          | 2.38E-05    |
| Dgkd          | 666.2216893 | -0.945732122 | 0.159884501  | -5.915095684 | 3.32E-09     |          | 1.82E-08    |
| Vbp1          | 320.0939059 | -0.945803671 | 0.214713696  | -4.404952682 | 1.06E-05     |          | 3.72E-05    |
| Gimap4        | 177.8696618 | -0.947005047 | 0.357995144  | -2.645301376 | 0.008161819  |          | 0.016925275 |
| Gm15460       | 0.779796063 | -0.947295921 | 2.431108691  | -0.389655931 | 0.696790988  | NA       |             |
| Cds2          | 2366.871056 | -0.947487966 | 0.227813492  | -4.159051156 | 3.20E-05     |          | 0.000104381 |
| Mttr7         | 77.96409307 | -0.947763515 | 0.334089572  | -2.836854529 | 0.004556037  |          | 0.009992641 |
| Serpina3e-ps  | 0.848581167 | -0.948334747 | 3.341069762  | -0.283841648 | 0.776531736  | NA       |             |
| Aoc2          | 66.49842253 | -0.948604128 | 0.360820413  | -2.629020123 | 0.008563129  |          | 0.017682198 |
| 7530416G11Rik | 2.012312239 | -0.948729201 | 1.620397038  | -0.585491814 | 0.558217069  |          | 0.643353475 |
| Tnfsf14       | 7.345542322 | -0.948845252 | 0.735860985  | -1.289435465 | 0.197246738  |          | 0.274010951 |
| Fabp3         | 2.079949845 | -0.949103167 | 1.434663382  | -0.661551119 | 0.508258943  |          | 0.597778438 |
| Mageb3        | 0.781063106 | -0.949115148 | 2.184395042  | -0.434497941 | 0.66392689   | NA       |             |
| Gm12816       | 0.763263342 | -0.949927784 | 3.433132057  | -0.276694216 | 0.782014913  | NA       |             |
| Aprt          | 1307.709501 | -0.950175396 | 0.146704388  | -6.476802811 | 9.37E-11     |          | 6.14E-10    |
| Adrg2         | 51.58131361 | -0.950869417 | 0.70091476   | -1.356612061 | 0.174904507  |          | 0.247881955 |
| Hey2          | 8.093286901 | -0.951401479 | 0.778276274  | -1.222446978 | 0.221538643  |          | 0.30239778  |
| Dock3         | 1.078198232 | -0.951419727 | 1.962798185  | -0.484726211 | 0.627870571  | NA       |             |
| Nhlrc4        | 1.378720493 | -0.951632241 | 1.689642357  | -0.56321519  | 0.57328836   | NA       |             |
| Efr3b         | 29.29113235 | -0.951747874 | 0.580822373  | -1.638621234 | 0.101292167  |          | 0.156048154 |
|               | 2-Sep       | 2258.602903  | -0.951961435 | 0.125671956  | -7.574971117 | 3.59E-14 | 3.40E-13    |
| Nat8f4        | 305.4761837 | -0.952425611 | 0.372375861  | -2.557699658 | 0.010536705  |          | 0.021265509 |
| Gm15448       | 2.698553262 | -0.952489257 | 1.342256741  | -0.709617786 | 0.477941187  |          | 0.568215863 |
| Dtx4          | 539.914498  | -0.952629431 | 0.205527984  | -4.635035142 | 3.57E-06     |          | 1.34E-05    |
| Rtl8a         | 210.9907299 | -0.953259875 | 0.263156948  | -3.622400555 | 0.000291882  |          | 0.000812541 |
| AA792892      | 0.762194348 | -0.953297374 | 2.348386952  | -0.405937094 | 0.684788822  | NA       |             |
| Tha1          | 285.695199  | -0.954040063 | 0.412678003  | -2.31182679  | 0.02078723   |          | 0.038891649 |
| Serpina3g     | 134.9632606 | -0.954342117 | 0.416363461  | -2.292089019 | 0.021900507  |          | 0.040764258 |
| Prrc2c        | 1486.84731  | -0.954661043 | 0.151766282  | -6.290336892 | 3.17E-10     |          | 1.95E-09    |
| Gm49327       | 63.38005459 | -0.954692808 | 0.399239315  | -2.391279545 | 0.016789764  |          | 0.032153661 |
| Acap2         | 495.7607208 | -0.955487955 | 0.140709981  | -6.790477478 | 1.12E-11     |          | 8.14E-11    |
| Reep5         | 470.0643954 | -0.955572859 | 0.176745846  | -5.406479862 | 6.43E-08     |          | 3.02E-07    |
| Exo5          | 88.98325311 | -0.955581378 | 0.257323852  | -3.713535959 | 0.000204383  |          | 0.000586094 |
| Ccdc134       | 145.5564865 | -0.955722183 | 0.196725445  | -4.858152349 | 1.18E-06     |          | 4.74E-06    |
| Gm5857        | 2.303012901 | -0.956376466 | 1.317120863  | -0.726111394 | 0.4677170485 |          | 0.558324667 |
| Celf2         | 337.0242242 | -0.956716441 | 0.255003722  | -3.75177429  | 0.000175588  |          | 0.000509604 |
| Atp11a        | 606.2790182 | -0.956824828 | 0.279312514  | -3.425642536 | 0.000613347  |          | 0.00161214  |
| Pik3r6        | 45.26351372 | -0.957263286 | 0.424620903  | -2.254395108 | 0.024171323  |          | 0.044461881 |
| Gm45015       | 4.001866136 | -0.957349814 | 1.132247766  | -0.845530318 | 0.397814812  |          | 0.490627716 |
| Galnt7        | 82.38347764 | -0.958102195 | 0.312599372  | -3.064952396 | 0.002177046  |          | 0.005114274 |
| Tmem38a       | 64.88441596 | -0.959056031 | 0.379014298  | -2.530395387 | 0.011393406  |          | 0.022845775 |
| Sema6b        | 177.5661597 | -0.959499977 | 0.228793968  | -4.193729346 | 2.74E-05     |          | 9.05E-05    |
| Polk          | 171.7452865 | -0.959825106 | 0.207660516  | -4.62208764  | 3.80E-06     |          | 1.42E-05    |
| Fcgr2b        | 856.3157648 | -0.959879981 | 0.234389348  | -4.09523722  | 4.22E-05     |          | 0.000135324 |



|               |             |              |             |                 |                |             |
|---------------|-------------|--------------|-------------|-----------------|----------------|-------------|
| Olf1r76       | 3.615899889 | -0.960368176 | 1.221437603 | -0.786260529    | 0.431714872    | 0.523201474 |
| Aebp2         | 708.6748562 | -0.9605527   | 0.148795943 | -6.455503313    | 1.08E-10       | 7.01E-10    |
| B3gnt11       | 93.90227006 | -0.961367568 | 0.227814323 | -4.219961048    | 2.44E-05       | 8.13E-05    |
| Gm9436        | 0.867602619 | -0.962425483 | 2.382782252 | -0.403908281    | 0.686280167 NA |             |
| Hes1          | 585.7671112 | -0.962428321 | 0.263870342 | -3.647353139    | 0.000264956    | 0.000744023 |
| Tfec          | 34.55279377 | -0.962468453 | 0.437166285 | -2.201607228    | 0.027693065    | 0.05013927  |
| C1cn5         | 168.7906962 | -0.962725105 | 0.308887712 | -3.116747826    | 0.001828579    | 0.004356291 |
| Gm10330       | 3.984879115 | -0.962755517 | 1.06319434  | -0.905531077    | 0.365184104    | 0.45746628  |
| Cbfb          | 458.4506265 | -0.962845264 | 0.190568553 | -5.052487672    | 4.36E-07       | 1.84E-06    |
| Nup107        | 170.2407252 | -0.96362379  | 0.324807533 | -2.966753211    | 0.003009624    | 0.006863956 |
| Trim30d       | 153.0109423 | -0.96451285  | 0.296129369 | -3.257065831    | 0.001125703    | 0.002810219 |
| Slc16a12      | 1359.639261 | -0.965609192 | 0.194965752 | -4.952711871    | 7.32E-07       | 3.01E-06    |
| Gng12         | 1424.718627 | -0.966506006 | 0.164320084 | -5.881849526    | 4.06E-09       | 2.20E-08    |
| Actr3         | 2199.567465 | -0.966894144 | 0.170689438 | -5.66463956     | 1.47E-08       | 7.47E-08    |
| H2ac20        | 0.816787668 | -0.966897149 | 2.758763054 | -0.350482129    | 0.7259769 NA   |             |
| Atp7b         | 882.5361544 | -0.966918906 | 0.140545352 | -6.879764366    | 6.00E-12       | 4.50E-11    |
| Olf1r789      | 0.781743798 | -0.967093586 | 2.431528804 | -0.397730672    | 0.690828725 NA |             |
| Drc3          | 15.1181359  | -0.967104852 | 0.511319981 | -1.891388734    | 0.058572471    | 0.096776845 |
| Mical2        | 627.4046605 | -0.967546858 | 0.27578772  | -3.508302904    | 0.000450975    | 0.001213994 |
| Htr1d         | 1.948348193 | -0.967761771 | 1.71521239  | -0.564222703    | 0.572602579    | 0.656603805 |
| Bsn           | 3.929969768 | -0.967827255 | 1.043398018 | -0.927572449    | 0.353629395    | 0.446072802 |
| Egr3          | 8.566180199 | -0.968525808 | 1.024849557 | -0.945041935    | 0.344637467    | 0.436896159 |
| Ctnnd1        | 3296.459551 | -0.968803171 | 0.166992251 | -5.801485807    | 6.57E-09       | 3.47E-08    |
| Ano8          | 193.1217386 | -0.968891194 | 0.236028212 | -4.104980436    | 4.04E-05       | 0.00012999  |
| Rbm43         | 130.099737  | -0.969442523 | 0.212043375 | -4.57190668     | 4.83E-06       | 1.78E-05    |
| Rab12         | 740.2785458 | -0.969448372 | 0.239395326 | -4.049571009    | 5.13E-05       | 0.000162323 |
| Gpr83         | 0.729779418 | -0.969458673 | 2.477987571 | -0.391228223    | 0.695628549 NA |             |
| Gm17906       | 0.763771886 | -0.969583631 | 2.859998922 | -0.339015383    | 0.734598141 NA |             |
| Adamts7       | 407.3612387 | -0.970583389 | 0.329528653 | -2.945368725    | 0.0032257      | 0.007313703 |
| Gm5134        | 0.870138193 | -0.970740412 | 2.41672661  | -0.401675725    | 0.687922692 NA |             |
| Brca2         | 99.59676015 | -0.971182239 | 0.402657491 | -2.411931381    | 0.015868268    | 0.030626314 |
| Sfxn4         | 22.44521371 | -0.971420601 | 0.523022627 | -1.857320414    | 0.063265582    | 0.103497902 |
| Wasf2         | 823.9086381 | -0.971664584 | 0.156397931 | -6.212771328    | 5.21E-10       | 3.13E-09    |
| Arl6          | 87.8036137  | -0.97247407  | 0.327588188 | -2.968587105    | 0.002991723    | 0.006827697 |
| Mal           | 22.26051701 | -0.973053973 | 0.489939426 | -1.986069955    | 0.047025557    | 0.08008908  |
| Rock2         | 1032.202299 | -0.973143746 | 0.179031179 | -5.435610446    | 5.46E-08       | 2.58E-07    |
| Polh          | 97.77119632 | -0.973154232 | 0.283928344 | -3.427464189    | 0.000609247    | 0.001602103 |
| Cmpk2         | 173.0725333 | -0.973674339 | 0.32619923  | -2.984906917    | 0.002836646    | 0.006501633 |
| Ankrd27       | 890.8227092 | -0.97381119  | 0.152495991 | -6.385815027    | 1.70E-10       | 1.09E-09    |
| Ilf3          | 550.1848764 | -0.974035715 | 0.215872971 | -4.512078157    | 6.42E-06       | 2.33E-05    |
| Ilgav         | 679.0407261 | -0.974272571 | 0.303831883 | -3.2066173      | 0.001343055    | 0.003303478 |
| Spr-ps1       | 14.67952735 | -0.974386867 | 1.073752934 | -0.907459096 NA | NA             |             |
| Pacsin1       | 5.151649079 | -0.974410918 | 0.972279914 | -1.002191759    | 0.316250987    | 0.407640014 |
| 6720489N17Rik | 10.66918353 | -0.974431986 | 0.705430682 | -1.381329181    | 0.16717777     | 0.238420706 |
| Mob1a         | 1002.980203 | -0.974711928 | 0.190738669 | -5.110195718    | 3.22E-07       | 1.39E-06    |
| Slc27a3       | 55.50998949 | -0.975941047 | 0.38173317  | -2.556605306    | 0.010569907    | 0.021324944 |
| Ednra         | 81.32710109 | -0.976691556 | 0.31261107  | -3.124302524    | 0.001782271    | 0.004260258 |
| Phf21a        | 656.1911054 | -0.976718621 | 0.161973885 | -6.030099354    | 1.64E-09       | 9.28E-09    |
| Rasa3         | 314.9379457 | -0.976934692 | 0.188216619 | -5.19048052     | 2.10E-07       | 9.30E-07    |
| Txlnb         | 4.181339529 | -0.977068238 | 1.081960254 | -0.903053725    | 0.366497382    | 0.458909098 |
| Gm19120       | 0.789584796 | -0.977823593 | 2.463724486 | -0.396888369    | 0.691449782 NA |             |
| Igkv8-16      | 0.295079161 | -0.978355322 | 3.63099912  | -0.269445211    | 0.787587099 NA |             |
| Efnb3         | 3.832173783 | -0.978641535 | 1.04332628  | -0.938001423    | 0.348243679    | 0.440713996 |
| Zbtb12        | 143.9278011 | -0.978915564 | 0.26922416  | -3.63606135     | 0.000276838    | 0.000774711 |
| Gm27193       | 0.295397236 | -0.979699477 | 3.630901016 | -0.269822689    | 0.787296666 NA |             |
| Gm18225       | 0.295542507 | -0.980309377 | 3.630856904 | -0.269993945    | 0.787164912 NA |             |
| Sult6b1       | 0.295599786 | -0.980549185 | 3.630839626 | -0.270061277    | 0.787113112 NA |             |
| Pdzd2         | 45.12256327 | -0.980913911 | 0.421967035 | -2.324622138    | 0.020092174    | 0.03773474  |
| Rp2           | 294.283252  | -0.981230187 | 0.199536608 | -4.917544691    | 8.76E-07       | 3.57E-06    |
| Klk8          | 5.497245543 | -0.98129829  | 0.874856445 | -1.121667784    | 0.262003719    | 0.347328103 |
| Gm17241       | 0.295816013 | -0.981451142 | 3.630774978 | -0.270314505    | 0.786918307 NA |             |
| Dnajc18       | 274.8426838 | -0.981466134 | 0.212047511 | -4.628519935    | 3.68E-06       | 1.38E-05    |
| Pnma3         | 0.295890815 | -0.981761968 | 3.630752821 | -0.270401764    | 0.786851183 NA |             |
| Armc10        | 309.5146    | -0.982234121 | 0.209954505 | -4.678318851    | 2.89E-06       | 1.10E-05    |
| 1810030007Rik | 260.9940143 | -0.982719212 | 0.180114634 | -5.456076433    | 4.87E-08       | 2.32E-07    |
| Zfp518b       | 47.23893069 | -0.983235986 | 0.442661029 | -2.221193918    | 0.02633783     | 0.047969194 |

|          |              |              |             |              |             |    |             |
|----------|--------------|--------------|-------------|--------------|-------------|----|-------------|
| Gm49351  | 0.753383966  | -0.9834685   | 2.351767985 | -0.418182621 | 0.675813601 | NA |             |
| Bcl10    | 391.4692215  | -0.983907307 | 0.228454312 | -4.306801212 | 1.66E-05    |    | 5.66E-05    |
| Atn1     | 964.4741265  | -0.98425358  | 0.179626204 | -5.479454327 | 4.27E-08    |    | 2.04E-07    |
| Olftr870 | 0.790779486  | -0.984352879 | 2.429898226 | -0.405100456 | 0.685403672 | NA |             |
| Gpr15    | 0.835611465  | -0.984742139 | 2.30094916  | -0.427972141 | 0.668671403 | NA |             |
| Pxylp1   | 184.1231177  | -0.984986269 | 0.344447299 | -2.859613859 | 0.004241571 |    | 0.009377552 |
| Fat3     | 3.949867247  | -0.985123069 | 1.133625528 | -0.869002193 | 0.384845931 |    | 0.477118278 |
| Trp53    | 951.5473641  | -0.985373034 | 0.135620143 | -7.265683478 | 3.71E-13    |    | 3.17E-12    |
| Gm49195  | 0.736391337  | -0.985989156 | 2.772223604 | -0.355667254 | 0.722089771 | NA |             |
| Fam3b    | 0.296971295  | -0.986188075 | 3.630443735 | -0.27164395  | 0.785895803 | NA |             |
| Hsd17b1  | 7.482562839  | -0.986860166 | 0.804511013 | -1.226658367 | 0.219951022 |    | 0.300675569 |
| Slc5a3   | 178.3023929  | -0.986878844 | 0.337678564 | -2.922539213 | 0.003471899 |    | 0.007811658 |
| Usp27x   | 25.86122458  | -0.98752217  | 0.426385603 | -2.316030754 | 0.02055659  |    | 0.038516374 |
| Pou3f1   | 6.703549417  | -0.987792515 | 1.292739293 | -0.764108061 | 0.444802849 |    | 0.535937669 |
| VeZF1    | 449.0533333  | -0.98808979  | 0.193820333 | -5.097967672 | 1.93E-07    |    | 1.47E-06    |
| Mllt6    | 844.2846166  | -0.988752056 | 0.199336426 | -4.960217631 | 7.04E-07    |    | 2.90E-06    |
| Cep128   | 52.48507386  | -0.989457606 | 0.389038486 | -2.543341189 | 0.010979796 |    | 0.02207874  |
| Trim7    | 581.6155965  | -0.990149249 | 0.327411112 | -3.024177285 | 0.002493103 |    | 0.005780283 |
| Snca     | 19.35613114  | -0.991656818 | 0.983176314 | -1.008625619 | NA          | NA |             |
| Slc44a3  | 283.8032603  | -0.991894456 | 0.339182691 | -2.924366369 | 0.003451582 |    | 0.007767997 |
| Arhgap23 | 330.8383783  | -0.992448889 | 0.202768007 | -4.894504344 | 9.86E-07    |    | 3.98E-06    |
| Rtl10    | 10.75467343  | -0.99294953  | 0.664330898 | -1.494661069 | 0.135002919 |    | 0.19907705  |
| Gm48365  | 29.392064    | -0.993421564 | 0.542918901 | -1.829778925 | 0.067283003 |    | 0.109283598 |
| Sym      | 9.749776807  | -0.993553847 | 0.693251284 | -1.43317996  | 0.151806415 |    | 0.220123821 |
| Tmprss15 | 0.795049668  | -0.993601635 | 3.399611863 | -0.29226914  | 0.770080852 | NA |             |
| Mrps6    | 360.7877164  | -0.993801536 | 0.186874009 | -5.318029727 | 1.05E-07    |    | 4.81E-07    |
| Nlgn3    | 15.5381531   | -0.993829803 | 0.836609176 | -1.187926012 | 0.23486256  |    | 0.317663527 |
| Plcxd3   | 1.174893158  | -0.994049689 | 1.881649135 | -0.528286422 | 0.597300554 | NA |             |
| Grin2d   | 9.541424586  | -0.994460608 | 0.773221724 | -1.286126058 | 0.198399071 |    | 0.275320095 |
| Jakmip1  | 10.69030683  | -0.994477404 | 0.688105263 | -1.445240222 | 0.148390422 |    | 0.215794585 |
| Ptpn1    | 709.9727013  | -0.995179383 | 0.241232408 | -4.125396713 | 3.70E-05    |    | 0.000119768 |
| Pbxip1   | 524.9103423  | -0.995570383 | 0.189073062 | -5.265532649 | 1.40E-07    |    | 6.31E-07    |
| Zfp362   | 246.7674373  | -0.995721714 | 0.174096657 | -5.719361479 | 1.07E-08    |    | 5.53E-08    |
| Tnfrsf14 | 48.11522813  | -0.996158325 | 0.385647623 | -2.583079126 | 0.009792286 |    | 0.01991398  |
| Ptpn4    | 178.5972728  | -0.996389263 | 0.201026895 | -4.956497296 | 7.18E-07    |    | 2.95E-06    |
| Ift22    | 101.7988043  | -0.997478961 | 0.265700525 | -3.754147499 | 0.000173932 |    | 0.000505489 |
| Styx11   | 4.562405368  | -0.997634371 | 1.046150486 | -0.953624153 | 0.340273926 |    | 0.432586867 |
| Flot2    | 1107.024127  | -0.99816375  | 0.198475152 | -5.029162297 | 4.93E-07    |    | 2.07E-06    |
| Cep250   | 561.1470315  | -0.998421739 | 0.18201081  | -5.485507917 | 4.12E-08    |    | 1.98E-07    |
| Tusc3    | 214.3553357  | -0.998567105 | 0.26223211  | -3.807951299 | 0.000140123 |    | 0.000413504 |
| Ccr6     | 1.438196578  | -0.999640566 | 1.838468757 | -0.543735412 | 0.58662356  | NA |             |
| Stk32c   | 6.56847907   | -1.000491835 | 0.810941579 | -1.233740951 | 0.217299449 |    | 0.297623605 |
| Gstp3    | 544.2738868  | -1.000611297 | 0.277461218 | -3.606310472 | 0.000310582 |    | 0.000860096 |
| Fcrl5    | 0.8732229289 | -1.000752869 | 2.72607394  | -0.367104081 | 0.713541383 | NA |             |
| Gm49368  | 2.792085349  | -1.000918293 | 1.77893809  | -0.562649312 | 0.573673706 |    | 0.657478275 |
| Stx6     | 351.6749598  | -1.001343356 | 0.192172247 | -5.210655402 | 1.88E-07    |    | 8.41E-07    |
| Zmiz1    | 1474.894225  | -1.001366782 | 0.217508347 | -4.603808536 | 4.15E-06    |    | 1.54E-05    |
| Tmem40   | 1.669625808  | -1.001464102 | 1.488976974 | -0.672585352 | 0.501211123 |    | 0.590711872 |
| Gm6763   | 0.321592665  | -1.001562933 | 3.629740507 | -0.275932379 | 0.782600004 | NA |             |
| Gm8764   | 0.321592665  | -1.001562933 | 3.629740507 | -0.275932379 | 0.782600004 | NA |             |
| Fbxo25   | 195.5416058  | -1.001793617 | 0.22065417  | -4.540107333 | 5.62E-06    |    | 2.06E-05    |
| Cd151    | 1229.758811  | -1.002538894 | 0.195067282 | -5.13945179  | 2.76E-07    |    | 1.20E-06    |
| F2r      | 1336.921764  | -1.003164551 | 0.207359012 | -4.837815058 | 1.31E-06    |    | 5.21E-06    |
| Cep170b  | 1080.182651  | -1.003889939 | 0.162125486 | -6.192055073 | 5.94E-10    |    | 3.55E-09    |
| Nek8     | 322.9572015  | -1.004161634 | 0.275481345 | -3.645116638 | 0.000267271 |    | 0.000750029 |
| Midn     | 1244.661513  | -1.005638577 | 0.176542553 | -5.696295661 | 1.22E-08    |    | 6.28E-08    |
| Maea     | 961.1832806  | -1.005878405 | 0.249232554 | -4.035902978 | 5.44E-05    |    | 0.000171244 |
| Mme      | 859.1139492  | -1.005898749 | 0.307856394 | -3.267428481 | 0.001085293 |    | 0.002717297 |
| Sass6    | 64.21158697  | -1.006093934 | 0.486240873 | -2.06912662  | 0.038534206 |    | 0.067157141 |
| Arhgef40 | 451.3117809  | -1.00619927  | 0.403740691 | -2.492191877 | 0.012695743 |    | 0.025099969 |
| Cbln3    | 43.14689333  | -1.006419618 | 0.385566667 | -2.61023502  | 0.009048004 |    | 0.018559784 |
| Bmp7     | 134.540852   | -1.007316497 | 0.356435402 | -2.82608431  | 0.004712086 |    | 0.010298928 |
| Gm6723   | 3.695676535  | -1.007395923 | 1.274398182 | -0.790487571 | 0.429243078 |    | 0.520995906 |
| Plscr2   | 994.424705   | -1.007464439 | 0.203955714 | -4.939623504 | 7.83E-07    |    | 3.21E-06    |
| Slc35f5  | 1079.55286   | -1.008088883 | 0.20661249  | -4.879128464 | 1.07E-06    |    | 4.28E-06    |
| Gm45380  | 2.175088265  | -1.008475291 | 1.374481817 | -0.733713083 | 0.463123623 |    | 0.553669813 |

|               |             |              |             |              |                |             |
|---------------|-------------|--------------|-------------|--------------|----------------|-------------|
| Gp1bb         | 3.984018943 | -1.008778515 | 1.276149574 | -0.790486112 | 0.42924393     | 0.520995906 |
| H2aw          | 135.4680924 | -1.009351702 | 0.24666048  | -4.092068991 | 4.28E-05       | 0.00013698  |
| Tnfsf4        | 0.306046064 | -1.010156292 | 3.629727552 | -0.278300858 | 0.780781418 NA |             |
| Gm12138       | 0.306141149 | -1.01057009  | 3.629695394 | -0.278417327 | 0.78069202 NA  |             |
| Baz1a         | 362.4267818 | -1.010770876 | 0.312102402 | -3.238587299 | 0.001201233    | 0.00298435  |
| lfrd1         | 564.3314583 | -1.011135178 | 0.229207797 | -4.41143447  | 1.03E-05       | 3.62E-05    |
| Krt80         | 29.3768001  | -1.011660162 | 0.528884478 | -1.912818778 | 0.055771256    | 0.092650695 |
| Filip1        | 14.16474781 | -1.01177678  | 0.613277705 | -1.649785688 | 0.098986777    | 0.153091407 |
| BC052040      | 154.0983724 | -1.012107695 | 0.246489095 | -4.106095227 | 4.02E-05       | 0.000129413 |
| Cd207         | 49.53519857 | -1.012507299 | 0.727804748 | -1.39117985  | 0.164170896    | 0.234758047 |
| Klra3         | 1.650402231 | -1.01331192  | 1.627292598 | -0.622698045 | 0.533482968    | 0.621103437 |
| Ighv9-4       | 0.306781485 | -1.013612135 | 3.629438648 | -0.279275181 | 0.780033652 NA |             |
| Fyn           | 170.0751168 | -1.01422543  | 0.388971822 | -2.607452193 | 0.009121881    | 0.018691084 |
| Map10         | 11.28079111 | -1.015379119 | 0.583222623 | -1.740980337 | 0.081687025    | 0.12956833  |
| Rab25         | 9.6875211   | -1.015417101 | 0.643294916 | -1.57846281  | 0.114459325    | 0.173402877 |
| Mpz           | 6.864405912 | -1.015429677 | 1.132076354 | -0.896962183 | 0.369739097    | 0.461939748 |
| Baiap2        | 1219.306718 | -1.015493336 | 0.357666631 | -2.839217439 | 0.004522433    | 0.009930247 |
| Ankrd50       | 248.5594381 | -1.015774374 | 0.277116519 | -3.665513615 | 0.000246843    | 0.00069741  |
| Fbxo44        | 107.0701095 | -1.016009645 | 0.331883787 | -3.061341601 | 0.002203475    | 0.005168526 |
| Ccdc96        | 5.050374549 | -1.016364402 | 1.056218955 | -0.962266769 | 0.335915617    | 0.42807972  |
| Gm11875       | 0.781221689 | -1.016409512 | 2.074107584 | -0.490046668 | 0.624100875 NA |             |
| 4931440P22Rik | 14.92576919 | -1.016812932 | 0.570030315 | -1.783787468 | 0.074458207    | 0.119413312 |
| Arvcf         | 517.4210216 | -1.017177382 | 0.25872946  | -3.931432409 | 8.44E-05       | 0.000258913 |
| Bahd1         | 451.6632262 | -1.017199802 | 0.20829049  | -4.883563336 | 1.04E-06       | 4.19E-06    |
| Smc4          | 399.4608993 | -1.017257198 | 0.337648511 | -3.012769688 | 0.002588753    | 0.005978086 |
| Sdk2          | 18.34283354 | -1.017601838 | 0.491258709 | -2.071417403 | 0.038319806    | 0.06683131  |
| Tbc1d31       | 221.1696517 | -1.018128894 | 0.327153232 | -3.112085694 | 0.001857706    | 0.00442259  |
| Dock7         | 427.1285873 | -1.018488516 | 0.270101826 | -3.770757618 | 0.000162753    | 0.000475104 |
| Zbtb3         | 7.813422395 | -1.018711332 | 0.805323299 | -1.264971885 | 0.205881406    | 0.284337833 |
| Cd27          | 9.736719974 | -1.018760133 | 0.657937219 | -1.548415417 | 0.121522312    | 0.182304855 |
| Efcab7        | 15.93193322 | -1.018895594 | 0.570999074 | -1.784408488 | 0.074357313    | 0.119296393 |
| Sgk3          | 314.5791536 | -1.019067712 | 0.255703831 | -3.985343927 | 6.74E-05       | 0.000209356 |
| Islr          | 78.35918226 | -1.01928439  | 0.261348437 | -3.900097523 | 9.62E-05       | 0.000291782 |
| Adam10        | 878.0127966 | -1.019390008 | 0.143018537 | -7.127677502 | 1.02E-12       | 8.34E-12    |
| Myo1a         | 6.599931624 | -1.019615973 | 0.897328834 | -1.13627907  | 0.255839788    | 0.340754554 |
| Cdpf1         | 170.3021471 | -1.019650378 | 0.269022442 | -3.79020564  | 0.000150523    | 0.000441823 |
| Xpnp2         | 0.871350107 | -1.019702856 | 2.038039262 | -0.500335237 | 0.616839047 NA |             |
| Tcf4          | 428.3868861 | -1.019829545 | 0.160903728 | -6.338134963 | 2.33E-10       | 1.46E-09    |
| Defb42        | 4.892370423 | -1.020175102 | 0.925426439 | -1.102383786 | 0.270294857    | 0.356710538 |
| Calhm5        | 8.471111819 | -1.020439106 | 0.734075775 | -1.390100506 | 0.16449836     | 0.235127696 |
| Col12a1       | 129.2368506 | -1.020618913 | 0.320429372 | -3.185160294 | 0.001446738    | 0.003529984 |
| Zbtb34        | 162.415663  | -1.020912756 | 0.289469564 | -3.526839721 | 0.000420551    | 0.001138748 |
| Cybc1         | 313.7738505 | -1.021041605 | 0.179200124 | -5.697772876 | 1.21E-08       | 6.23E-08    |
| Zfp366        | 43.83449284 | -1.021116247 | 0.399622103 | -2.555204631 | 0.010612539    | 0.021400823 |
| Dcaf4         | 111.5569412 | -1.021369935 | 0.294152125 | -3.472250744 | 0.000516114    | 0.001375014 |
| Arhgap31      | 138.4568483 | -1.021399209 | 0.231429413 | -4.413437318 | 1.02E-05       | 3.59E-05    |
| Smco4         | 206.7840319 | -1.021519006 | 0.263226041 | -3.880767277 | 0.000104127    | 0.000313911 |
| Lgals3bp      | 2241.158603 | -1.022687418 | 0.204563124 | -4.999373285 | 5.75E-07       | 2.39E-06    |
| Cdh13         | 48.30830689 | -1.022973209 | 0.410078979 | -2.494576073 | 0.012610769    | 0.024952228 |
| Stk39         | 52.87276055 | -1.023251861 | 0.349516149 | -2.927623987 | 0.003415628    | 0.007701314 |
| Ascl4         | 0.774118809 | -1.023714373 | 2.346772823 | -0.436222187 | 0.662675532 NA |             |
| Slc29a2       | 39.6219083  | -1.023907489 | 0.468320208 | -2.186340609 | 0.028790695    | 0.051889605 |
| Gm7899        | 0.774430123 | -1.024060898 | 2.347082754 | -0.436312225 | 0.662610213 NA |             |
| Pomc          | 6.026480251 | -1.024766204 | 0.896328123 | -1.143293597 | 0.252916712    | 0.337724141 |
| Lama4         | 139.84283   | -1.024966082 | 0.341004659 | -3.00572457  | 0.002649489    | 0.006106325 |
| lsg15         | 332.970765  | -1.025334868 | 0.355941824 | -2.880624865 | 0.003968877    | 0.008816969 |
| Synpr         | 2.085148157 | -1.025490785 | 1.444442476 | -0.709956127 | 0.477731343    | 0.568170784 |
| Trbv1         | 0.311638085 | -1.025474712 | 3.629103625 | -0.28264484  | 0.777449104 NA |             |
| Slc36a4       | 200.0819502 | -1.025859875 | 0.234446676 | -4.37566398  | 1.21E-05       | 4.21E-05    |
| Trip6         | 606.6990233 | -1.026051349 | 0.233292239 | -4.398137516 | 1.09E-05       | 3.83E-05    |
| Unc93b1       | 1364.361555 | -1.026135432 | 0.169222501 | -6.063823817 | 1.33E-09       | 7.63E-09    |
| Serpine2      | 470.2744996 | -1.02659226  | 0.338835726 | -3.029763925 | 0.00244745     | 0.005682937 |
| Gm18983       | 0.317864542 | -1.026716597 | 3.628951785 | -0.282923736 | 0.777235299 NA |             |
| Trim43c       | 0.317965785 | -1.027009037 | 3.6289449   | -0.283004858 | 0.777173113 NA |             |
| Gm10645       | 1.377924902 | -1.027401805 | 2.050343869 | -0.501087559 | 0.616309502 NA |             |
| Tas2r108      | 0.311981699 | -1.027570726 | 3.628933054 | -0.283160563 | 0.777053758 NA |             |

|               |             |              |             |                 |                |             |
|---------------|-------------|--------------|-------------|-----------------|----------------|-------------|
| Cks1b         | 206.080719  | -1.0278956   | 0.32551268  | -3.157774374    | 0.001589786    | 0.003844349 |
| Dpt           | 149.6627099 | -1.028135736 | 0.425536425 | -2.41609337     | 0.015688038    | 0.030312781 |
| Wdsub1        | 138.7534548 | -1.028195875 | 0.279267366 | -3.681761638    | 0.000231628    | 0.000657584 |
| Psg28         | 0.787091475 | -1.028237091 | 2.312846154 | -0.444576519    | 0.65662582 NA  |             |
| Sntb2         | 254.4553944 | -1.028253951 | 0.186352979 | -5.517775749    | 3.43E-08       | 1.66E-07    |
| Slc10a3       | 115.6161458 | -1.028479677 | 0.261361409 | -3.935086214    | 8.32E-05       | 0.000255189 |
| Wfikkn2       | 5.331670696 | -1.028717109 | 1.141177613 | -0.901452234    | 0.36734792     | 0.459737728 |
| Gm7902        | 1.421930465 | -1.028794645 | 1.797122084 | -0.572467867    | 0.567005049 NA |             |
| Ppp1r2-ps4    | 0.318703109 | -1.029136876 | 3.628894842 | -0.283595122    | 0.776720676 NA |             |
| Dbndd1        | 0.79228557  | -1.029233468 | 2.149643169 | -0.478792705    | 0.632086107 NA |             |
| Slc2a3        | 33.50476081 | -1.02943742  | 0.587370513 | -1.752620189    | 0.079667224    | 0.12677745  |
| Lmna          | 1546.974262 | -1.029529691 | 0.202400846 | -5.086587883    | 3.65E-07       | 1.56E-06    |
| Gm9419        | 0.318863363 | -1.029598903 | 3.628883981 | -0.28372329     | 0.776622445 NA |             |
| Gnai2         | 2636.692696 | -1.029707293 | 0.122038984 | -8.437527606    | 3.24E-17       | 4.09E-16    |
| Prss32        | 0.368260868 | -1.029828993 | 3.22548208  | -0.319279093    | 0.749514885 NA |             |
| Ankrd42       | 35.50916125 | -1.030152948 | 0.350872535 | -2.935974875    | 0.003325013    | 0.007519874 |
| Acsm4         | 0.800949608 | -1.03051116  | 2.14826061  | -0.479695599    | 0.631443858 NA |             |
| Gm5915        | 0.319210936 | -1.030600441 | 3.628860449 | -0.284001123    | 0.77640952 NA  |             |
| Gm6592        | 0.319075633 | -1.030854487 | 3.628675134 | -0.284085637    | 0.776344754 NA |             |
| Rps23-ps2     | 0.319315061 | -1.030900335 | 3.628853405 | -0.284084315    | 0.776345767 NA |             |
| Csrnp2        | 72.78955514 | -1.031194605 | 0.327673559 | -3.147018054    | 0.001649448    | 0.003976214 |
| Z310034G01Rik | 3.505613133 | -1.03185687  | 1.231444908 | -0.837923697    | 0.402073559    | 0.495146473 |
| Uxs1          | 267.728746  | -1.032003738 | 0.252563503 | -4.086115877    | 4.39E-05       | 0.00014033  |
| Txndc16       | 135.2050439 | -1.032040804 | 0.333166142 | -3.097676127    | 0.001950445    | 0.004619503 |
| Ret           | 0.827056518 | -1.03227216  | 2.144471484 | -0.481364368    | 0.630257557 NA |             |
| Gm2016        | 0.894157541 | -1.032279649 | 2.793202903 | -0.369568443    | 0.711704067 NA |             |
| Gm20458       | 26.66755644 | -1.032649733 | 3.342582586 | -0.308937687 NA | NA             |             |
| Gsg1l         | 7.721669284 | -1.03306888  | 0.781348908 | -1.322160779    | 0.186114618    | 0.261164048 |
| Cers4         | 81.33650027 | -1.033177465 | 0.263795697 | -3.91658195     | 8.98E-05       | 0.00027376  |
| Etv5          | 135.8877402 | -1.033354987 | 0.351301976 | -2.94150064     | 0.003266262    | 0.007396816 |
| Ccna1         | 0.367040282 | -1.033652963 | 3.622442983 | -0.285346924    | 0.775378366 NA |             |
| Sdcbp         | 1667.483092 | -1.033788649 | 0.204027613 | -5.066905576    | 4.04E-07       | 1.72E-06    |
| Rgs4          | 28.96930707 | -1.034026791 | 0.611697209 | -1.690422607    | 0.090947133    | 0.142479942 |
| Cers3         | 0.319324054 | -1.03438329  | 3.628553544 | -0.285067666    | 0.775592301 NA |             |
| Vsx1          | 0.319329027 | -1.034452635 | 3.628551157 | -0.285086965    | 0.775577517 NA |             |
| Rad51c        | 24.97897272 | -1.034636214 | 0.561304339 | -1.843271364    | 0.0652894      | 0.106400315 |
| Ppp1ccb       | 74.51836064 | -1.035028024 | 1.128875698 | -0.916866247    | 0.359212733    | 0.451545397 |
| Tmem236       | 1.586095595 | -1.03558904  | 1.494687041 | -0.692846738    | 0.488405738 NA |             |
| Traf3         | 347.5925296 | -1.035621634 | 0.211590229 | -4.894468127    | 9.86E-07       | 3.98E-06    |
| Olfr9         | 0.811819672 | -1.035668203 | 1.948647494 | -0.53148053     | 0.59508583 NA  |             |
| AL935121.1    | 21.33795818 | -1.03604382  | 0.761234603 | -1.361004632    | 0.173512226    | 0.246133834 |
| Cmp1          | 443.091735  | -1.036216056 | 0.218869004 | -4.734412088    | 2.20E-06       | 8.44E-06    |
| Bcas1         | 1.494642202 | -1.037069984 | 1.895477077 | -0.54712874     | 0.584290289 NA |             |
| Zfp664        | 615.3714193 | -1.037079276 | 0.216232433 | -4.796131924    | 1.62E-06       | 6.33E-06    |
| Fgf12         | 8.089788551 | -1.037329992 | 0.69987415  | -1.48216646     | 0.138296009    | 0.203142371 |
| Zfp747        | 105.8945287 | -1.037594154 | 0.331487098 | -3.130119269    | 0.001747353    | 0.004185007 |
| Slc38a5       | 1.411389673 | -1.037650557 | 1.875909512 | -0.553145314    | 0.58016391 NA  |             |
| Eml2          | 300.9316672 | -1.038237963 | 0.202238513 | -5.133730205    | 2.84E-07       | 1.23E-06    |
| Rbpj          | 497.3411202 | -1.038250728 | 0.180206301 | -5.761456284    | 8.34E-09       | 4.36E-08    |
| Cplane1       | 204.8739019 | -1.038259978 | 0.310006989 | -3.349150225    | 0.000810598    | 0.002079308 |
| Htr2b         | 0.618534138 | -1.038721805 | 3.577907262 | -0.290315463    | 0.77157491 NA  |             |
| Rybp          | 569.7981619 | -1.039402218 | 0.234101462 | -4.439964666    | 9.00E-06       | 3.20E-05    |
| Pcsk5         | 389.1377021 | -1.039953251 | 0.312146102 | -3.331623377    | 0.00086341     | 0.002208133 |
| Vat1          | 814.644811  | -1.040133603 | 0.233640433 | -4.451856177    | 8.51E-06       | 3.03E-05    |
| Uaca          | 300.307401  | -1.040577279 | 0.177645602 | -5.857602248    | 4.70E-09       | 2.52E-08    |
| Zbed3         | 166.203251  | -1.041623102 | 0.209049172 | -4.982670314    | 6.27E-07       | 2.59E-06    |
| Csdc2         | 23.83752397 | -1.041865123 | 0.649404023 | -1.60434042     | 0.108639036    | 0.165689594 |
| Impa2         | 60.60919418 | -1.041902923 | 0.378653434 | -2.751600353    | 0.005930485    | 0.012685433 |
| Ankrd39       | 142.5027702 | -1.043008503 | 0.223670077 | -4.663156185    | 3.11E-06       | 1.18E-05    |
| Ras111b       | 61.16378238 | -1.043114934 | 0.431597208 | -2.416871365    | 0.015654548    | 0.03025493  |
| Hmx2          | 0.7959922   | -1.043187617 | 2.072503507 | -0.503346611    | 0.614720601 NA |             |
| Exoc6         | 465.8076505 | -1.043393054 | 0.170812436 | -6.108413887    | 1.01E-09       | 5.87E-09    |
| Arhgap21      | 1027.270661 | -1.043515027 | 0.27941655  | -3.734621395    | 0.000187998    | 0.000542942 |
| Plekhg1       | 93.46066287 | -1.04423714  | 0.318126806 | -3.282455671    | 0.001029072    | 0.002588699 |
| Gli3          | 16.22707482 | -1.045002481 | 0.493871145 | -2.115941559    | 0.034349778    | 0.060651996 |
| Muc20         | 0.86192184  | -1.045193976 | 2.382277324 | -0.438737323    | 0.66085188 NA  |             |

|              |             |              |             |              |                |             |
|--------------|-------------|--------------|-------------|--------------|----------------|-------------|
| Cldn5        | 109.767499  | -1.045908295 | 0.363294141 | -2.878957232 | 0.003989924    | 0.008861287 |
| C5ar2        | 58.31527314 | -1.046651532 | 0.291674744 | -3.588420158 | 0.000332688    | 0.000916262 |
| Sertad1      | 181.9114141 | -1.046715598 | 0.276747036 | -3.782210695 | 0.000155442    | 0.000454852 |
| Zfp566       | 34.25730107 | -1.046810329 | 0.511579066 | -2.046233709 | 0.040733382    | 0.070542737 |
| Orc2         | 154.8980454 | -1.047587301 | 0.241969945 | -4.329410841 | 1.50E-05       | 5.13E-05    |
| Epn2         | 266.6606346 | -1.04765696  | 0.292141029 | -3.586134291 | 0.000335616    | 0.000923879 |
| Apoc2        | 6995.370299 | -1.048703667 | 0.233068367 | -4.499553844 | 6.81E-06       | 2.47E-05    |
| Rcan2        | 171.2776516 | -1.049052297 | 0.446641657 | -2.348756057 | 0.018836243    | 0.035640429 |
| Wrb          | 94.30829337 | -1.04932121  | 0.238065709 | -4.40769574  | 1.04E-05       | 3.68E-05    |
| Il1rapl2     | 0.820233246 | -1.049516005 | 1.948964508 | -0.538499291 | 0.590232395 NA |             |
| Prrc2b       | 1702.546872 | -1.049588312 | 0.208639753 | -5.03062479  | 4.89E-07       | 2.05E-06    |
| Rnf212       | 3.776512469 | -1.049676356 | 1.083386607 | -0.968884375 | 0.332602882    | 0.424798767 |
| Slc26a2      | 198.1481673 | -1.049811513 | 0.24052313  | -4.36470086  | 1.27E-05       | 4.41E-05    |
| Cacna2d2     | 1.627267868 | -1.050059905 | 1.650469067 | -0.636219076 | 0.524633641 NA |             |
| Arhgap28     | 16.55989806 | -1.050267868 | 0.561215466 | -1.871416472 | 0.061287377    | 0.100657728 |
| Trnp1        | 7.234666121 | -1.050384251 | 1.152227746 | -0.911611663 | 0.361973181    | 0.454479215 |
| Mfap3l       | 10.751494   | -1.050664331 | 0.712141531 | -1.475358878 | 0.140116085    | 0.205338177 |
| Asah1        | 1134.439156 | -1.050797932 | 0.170095954 | -6.177677409 | 6.51E-10       | 3.86E-09    |
| Serpinb10    | 3.002288414 | -1.050873988 | 1.289159254 | -0.815162273 | 0.41497943     | 0.507171903 |
| Zfp568       | 430.3712145 | -1.051372047 | 0.2715025   | -3.872421237 | 0.00010776     | 0.000324115 |
| Cdh4         | 10.4723821  | -1.051659721 | 0.799982801 | -1.314602914 | 0.18864339     | 0.264210989 |
| Tmem204      | 160.2195274 | -1.051673949 | 0.246898652 | -4.259537023 | 2.05E-05       | 6.89E-05    |
| Parp12       | 884.7761733 | -1.051685208 | 0.224529613 | -4.683948789 | 2.81E-06       | 1.07E-05    |
| Mrgpra2b     | 1.399373297 | -1.052029702 | 1.670438505 | -0.629792536 | 0.52883033 NA  |             |
| Adnp2        | 231.328674  | -1.052149699 | 0.176282192 | -5.968553536 | 2.39E-09       | 1.33E-08    |
| Tnfaip1      | 984.6728314 | -1.052317315 | 0.175265602 | -6.004129189 | 1.92E-09       | 1.08E-08    |
| Chmp2b       | 776.4071689 | -1.052448035 | 0.206149881 | -5.105256569 | 3.30E-07       | 1.42E-06    |
| Gzma         | 11.38072449 | -1.052528988 | 0.888515735 | -1.184592402 | 0.236178643    | 0.319148185 |
| Six4         | 11.66077109 | -1.052604001 | 0.762012864 | -1.38134676  | 0.167172367    | 0.238420706 |
| Rfx2         | 24.04512213 | -1.053464869 | 0.455078432 | -2.314908367 | 0.020617947    | 0.038614792 |
| Isl2         | 0.314407235 | -1.053789202 | 3.626138455 | -0.290609202 | 0.771350222 NA |             |
| Hmgn2-ps1    | 1.451477943 | -1.053812092 | 2.127437664 | -0.495343346 | 0.620357778 NA |             |
| Kif7         | 16.89672432 | -1.054099303 | 0.467185406 | -2.256276182 | 0.02405334     | 0.044283082 |
| Neu2         | 56.4400108  | -1.054223308 | 0.291041163 | -3.622248134 | 0.000292054    | 0.000812754 |
| Dbf4         | 153.4500309 | -1.054356724 | 0.317522543 | -3.320572817 | 0.000898329    | 0.002288169 |
| Gpr39        | 257.9890223 | -1.054904092 | 0.260532628 | -4.049028708 | 5.14E-05       | 0.000162622 |
| Dlgap4       | 893.3111    | -1.055157153 | 0.173002229 | -6.099095721 | 1.07E-09       | 6.20E-09    |
| Hcar2        | 5.887841991 | -1.056170539 | 0.907007179 | -1.164456648 | 0.244239002    | 0.327883023 |
| Gca          | 223.8315505 | -1.056490011 | 0.246040467 | -4.293968484 | 1.76E-05       | 5.96E-05    |
| Cbfa2t3      | 78.10904375 | -1.056490473 | 0.364659558 | -2.897196716 | 0.003765136    | 0.008407077 |
| Pcdh18       | 14.74778078 | -1.056937131 | 0.81226127  | -1.301228028 | 0.193180414    | 0.269305724 |
| Kifap3       | 137.8514352 | -1.057334321 | 0.190530833 | -5.549413206 | 2.87E-08       | 1.40E-07    |
| Camk2d       | 255.3736792 | -1.057397748 | 0.204035137 | -5.182429669 | 2.19E-07       | 9.66E-07    |
| Prkab1       | 778.1798019 | -1.0574116   | 0.211030284 | -5.010710212 | 5.42E-07       | 2.26E-06    |
| Lypd5        | 2.132238605 | -1.05742156  | 1.613075658 | -0.655531286 | 0.51212575     | 0.601383085 |
| Ush1g        | 3.113003347 | -1.057872767 | 1.112354975 | -0.951020844 | 0.341593795    | 0.433941208 |
| Cnrip1       | 29.66455203 | -1.057876779 | 0.425121295 | -2.488411642 | 0.012831512    | 0.025315544 |
| Pax3         | 0.775077534 | -1.05806778  | 2.347354431 | -0.45074905  | 0.652170426 NA |             |
| Ccdc92b      | 6.386797267 | -1.05887601  | 0.888559982 | -1.191676456 | 0.233388133    | 0.316182186 |
| Dennd2a      | 108.4367155 | -1.058885662 | 0.355130864 | -2.981677375 | 0.002866739    | 0.006566193 |
| Lonrf3       | 35.21845099 | -1.058899879 | 0.351482683 | -3.012665861 | 0.002589639    | 0.005978086 |
| Bend5        | 3.354932706 | -1.059818506 | 1.328753292 | -0.797603673 | 0.425100519    | 0.516986278 |
| Tmem106a     | 266.3425682 | -1.060080419 | 0.261962491 | -4.046687817 | 5.19E-05       | 0.00016403  |
| Gm12565      | 0.327609718 | -1.060456119 | 3.338174818 | -0.317675429 | 0.750731151 NA |             |
| Gm5171       | 0.327640767 | -1.060552284 | 3.338093557 | -0.317711971 | 0.75070343 NA  |             |
| Atp8a1       | 150.5831675 | -1.060749711 | 0.269382973 | -3.937701396 | 8.23E-05       | 0.000252652 |
| Cmtr2        | 76.15998766 | -1.060897461 | 0.294137655 | -3.606806003 | 0.000309989    | 0.000858742 |
| Megf8        | 446.8099559 | -1.061346925 | 0.220829652 | -4.806179394 | 1.54E-06       | 6.04E-06    |
| Gm4824       | 0.77894176  | -1.061541681 | 2.334783121 | -0.454663935 | 0.649351031 NA |             |
| Trav13-4-dv7 | 0.352866848 | -1.061820728 | 3.624275348 | -0.29297463  | 0.769541544 NA |             |
| Klf4         | 38.56964668 | -1.061958275 | 0.388266361 | -2.735128204 | 0.006235598    | 0.013264847 |
| Zfp984       | 99.56546404 | -1.062359941 | 0.330725926 | -3.212206415 | 0.001317197    | 0.003247372 |
| Ankrd10      | 525.1840434 | -1.062465656 | 0.279407921 | -3.802560972 | 0.000143208    | 0.000421951 |
| Dcp1b        | 121.1050685 | -1.062794076 | 0.257001587 | -4.135359976 | 3.54E-05       | 0.000115082 |
| Lrrn1        | 9.984951925 | -1.062907118 | 0.82628658  | -1.286366187 | 0.198315293    | 0.275271057 |
| Cald1        | 5696.808534 | -1.063301892 | 0.23944841  | -4.440630417 | 8.97E-06       | 3.19E-05    |



|               |             |              |             |              |                |             |
|---------------|-------------|--------------|-------------|--------------|----------------|-------------|
| Dag1          | 1952.514245 | -1.063382313 | 0.136528799 | -7.788703316 | 6.77E-15       | 6.85E-14    |
| Trim32        | 210.2385465 | -1.063757088 | 0.222137558 | -4.788731349 | 1.68E-06       | 6.56E-06    |
| Zfp711        | 0.767566678 | -1.063853385 | 2.395412776 | -0.444121112 | 0.656955024 NA |             |
| Bco1          | 165.9480753 | -1.064260447 | 0.361443042 | -2.944476236 | 0.003235018    | 0.00733093  |
| Cd37          | 78.52021556 | -1.064263667 | 0.301886577 | -3.525375912 | 0.000422882    | 0.001144514 |
| Erf           | 755.8996296 | -1.06452136  | 0.238698679 | -4.459686846 | 8.21E-06       | 2.93E-05    |
| Mfsd10        | 251.2017229 | -1.064689309 | 0.288301002 | -3.692978177 | 0.000221643    | 0.000631974 |
| CAA01147332.1 | 1066.494705 | -1.064724143 | 0.230855246 | -4.612085548 | 3.99E-06       | 1.49E-05    |
| Carmil2       | 25.95384123 | -1.065145823 | 0.549294424 | -1.939116395 | 0.052487167    | 0.08799304  |
| Tmem17        | 25.23809266 | -1.065608932 | 0.446063621 | -2.38891692  | 0.016898123    | 0.032335751 |
| Gm11843       | 38.76173851 | -1.065684166 | 0.373796438 | -2.850974646 | 0.004358544    | 0.009603783 |
| Prss30        | 12.24661013 | -1.065717916 | 0.79469593  | -1.341038597 | 0.179907921    | 0.253833505 |
| Sifn5         | 463.0306064 | -1.065722459 | 0.268640939 | -3.967088794 | 7.28E-05       | 0.000224903 |
| Mmrm2         | 144.710135  | -1.066168118 | 0.31880669  | -3.34424638  | 0.000825064    | 0.002114188 |
| Rassf5        | 262.8879742 | -1.066319837 | 0.232651039 | -4.583344403 | 4.58E-06       | 1.70E-05    |
| Notch1        | 727.9207703 | -1.066576998 | 0.425023301 | -2.509455356 | 0.01209175     | 0.02403126  |
| Pag1          | 234.5460977 | -1.067125598 | 0.331737299 | -3.216779058 | 0.001296384    | 0.003202544 |
| Caskin2       | 490.6318379 | -1.067288265 | 0.250318744 | -4.263716919 | 2.01E-05       | 6.78E-05    |
| Jazf1         | 9.004851033 | -1.067716153 | 0.743620286 | -1.43583516  | 0.151049252    | 0.219193706 |
| Man2b2        | 1287.179457 | -1.067944076 | 0.155621844 | -6.862430421 | 6.77E-12       | 5.06E-11    |
| Mlxip         | 380.9876717 | -1.068946576 | 0.25736546  | -4.153418943 | 3.28E-05       | 0.000106768 |
| Sos2          | 875.660162  | -1.069009938 | 0.364105099 | -2.935992772 | 0.003324821    | 0.007519874 |
| 1700007K13Rik | 4.692714287 | -1.069522578 | 0.98502376  | -1.085783532 | 0.277574774    | 0.364764877 |
| Gm17177       | 0.394930021 | -1.069851561 | 3.177200407 | -0.336727755 | 0.736322138 NA |             |
| Parp11        | 170.2650175 | -1.071276312 | 0.333423741 | -3.212957511 | 0.001313757    | 0.00323936  |
| Fbxl19        | 218.2991931 | -1.071874106 | 0.172660868 | -6.207973589 | 5.37E-10       | 3.22E-09    |
| Farp1         | 861.1587914 | -1.07199662  | 0.206550234 | -5.190004384 | 2.10E-07       | 9.32E-07    |
| Cdc42ep5      | 88.96471664 | -1.072526587 | 0.291817725 | -3.675330512 | 0.000237542    | 0.000673252 |
| Ermp1         | 1002.696802 | -1.073629469 | 0.227536456 | -4.71849429  | 2.38E-06       | 9.09E-06    |
| Cd276         | 259.6430301 | -1.073844762 | 0.259176421 | -4.143296522 | 3.42E-05       | 0.000111423 |
| Poln          | 4.913291686 | -1.074096679 | 0.932798468 | -1.151477747 | 0.249535745    | 0.333784651 |
| Elfn1         | 2.292419323 | -1.074371934 | 1.680525042 | -0.639307304 | 0.522623038    | 0.611060421 |
| Cdx2          | 0.339381557 | -1.074535645 | 3.626613842 | -0.296291718 | 0.76700731 NA  |             |
| Defa31        | 0.339381557 | -1.074535645 | 3.626613842 | -0.296291718 | 0.76700731 NA  |             |
| Gm18588       | 0.339381557 | -1.074535645 | 3.626613842 | -0.296291718 | 0.76700731 NA  |             |
| Gm3883        | 0.339381557 | -1.074535645 | 3.626613842 | -0.296291718 | 0.76700731 NA  |             |
| Gm6502        | 0.339381557 | -1.074535645 | 3.626613842 | -0.296291718 | 0.76700731 NA  |             |
| Hoxc13        | 0.339381557 | -1.074535645 | 3.626613842 | -0.296291718 | 0.76700731 NA  |             |
| Il1rap1       | 0.339381557 | -1.074535645 | 3.626613842 | -0.296291718 | 0.76700731 NA  |             |
| Pcdha11       | 0.339381557 | -1.074535645 | 3.626613842 | -0.296291718 | 0.76700731 NA  |             |
| Serpinb12     | 0.339381557 | -1.074535645 | 3.626613842 | -0.296291718 | 0.76700731 NA  |             |
| Olf905        | 10.36211976 | -1.074555369 | 0.771711618 | -1.392431245 | 0.163791848    | 0.234333957 |
| Suv39h1       | 219.2216385 | -1.075452578 | 0.227472803 | -4.72782928  | 2.27E-06       | 8.70E-06    |
| Asb2          | 63.98517385 | -1.076360359 | 0.557103701 | -1.932064637 | 0.053351528    | 0.089240272 |
| Cep72         | 49.97878862 | -1.076923713 | 0.486942774 | -2.211602203 | 0.026994163    | 0.049037119 |
| Dok6          | 4.432652443 | -1.077137078 | 1.192517328 | -0.903246479 | 0.366395095    | 0.458848423 |
| Gm10269       | 1.488310835 | -1.077431875 | 1.63141872  | -0.660426328 | 0.508980281 NA |             |
| Nipal2        | 107.4709699 | -1.077591963 | 0.265095252 | -4.064923669 | 4.80E-05       | 0.000152679 |
| Cabin1        | 723.6461045 | -1.07772388  | 0.194300238 | -5.54669357  | 2.91E-08       | 1.42E-07    |
| Alox12        | 16.08256735 | -1.078783996 | 0.534802251 | -2.017164278 | 0.043678373    | 0.075018023 |
| Psg19         | 2.983414227 | -1.078787034 | 1.265906037 | -0.852185709 | 0.394111027    | 0.486693574 |
| Pou6f1        | 329.1473523 | -1.078788125 | 0.254582988 | -4.237471385 | 2.26E-05       | 7.56E-05    |
| Galr3         | 0.333957284 | -1.078905547 | 3.322543662 | -0.32472276  | 0.745390908 NA |             |
| Gm8436        | 0.333975804 | -1.078927908 | 3.322501624 | -0.324733598 | 0.745382704 NA |             |
| Izumo1        | 3.363387118 | -1.079264424 | 1.657366166 | -0.651192504 | 0.514922229    | 0.603574955 |
| Gm21909       | 0.334242837 | -1.079269374 | 3.321894997 | -0.324895692 | 0.745260017 NA |             |
| Pcbp3         | 35.12953552 | -1.079325231 | 0.592373463 | -1.822035082 | 0.068449663    | 0.110998749 |
| Vwa5a         | 731.5623    | -1.079516212 | 0.163507838 | -6.602229156 | 4.05E-11       | 2.76E-10    |
| Pcdh12        | 78.83500453 | -1.079878624 | 0.366597282 | -2.945680931 | 0.003222446    | 0.00730765  |
| Coro1c        | 709.3632845 | -1.08044213  | 0.248487138 | -4.348080701 | 1.37E-05       | 4.74E-05    |
| Tstd1         | 636.5074028 | -1.081012598 | 0.130653823 | -8.273868832 | 1.30E-16       | 1.54E-15    |
| Pram1         | 25.97364258 | -1.08101848  | 0.428687525 | -2.521693349 | 0.011679147    | 0.023330923 |
| St8sia1       | 9.699075914 | -1.081116311 | 0.68552632  | -1.577060253 | 0.114781662    | 0.173820528 |
| Cd40          | 57.65348852 | -1.083190291 | 0.399475599 | -2.711530553 | 0.006697337    | 0.014155244 |
| Siglech       | 14.65591954 | -1.08395952  | 0.717789843 | -1.510134937 | 0.131008996    | 0.194195406 |
| Plxna4        | 68.74985568 | -1.084684501 | 0.357743781 | -3.032014975 | 0.002429272    | 0.00564688  |

|               |             |              |             |              |                |             |
|---------------|-------------|--------------|-------------|--------------|----------------|-------------|
| Col4a3        | 26.64207033 | -1.084861764 | 0.55632374  | -1.950054771 | 0.051169591    | 0.086114432 |
| Rpl31-ps11    | 0.808584121 | -1.084910727 | 2.322505359 | -0.467129483 | 0.640407242 NA |             |
| 2310022B05Rik | 553.3888839 | -1.085019239 | 0.244419668 | -4.439165009 | 9.03E-06       | 3.21E-05    |
| Itgb2l        | 0.794240048 | -1.085988259 | 2.090204915 | -0.519560667 | 0.603369819 NA |             |
| Nqo1          | 277.4340972 | -1.086098156 | 0.435207157 | -2.49558891  | 0.012574824    | 0.024889771 |
| Cdyl          | 112.9400166 | -1.086329877 | 0.304072294 | -3.572603948 | 0.000353449    | 0.000969994 |
| Wdr17         | 0.337060251 | -1.08641871  | 3.626004783 | -0.299618664 | 0.764468046 NA |             |
| Cebpδ         | 334.1027572 | -1.086687157 | 0.421549497 | -2.577840006 | 0.009942002    | 0.020194358 |
| Tjp1          | 1135.996225 | -1.086921255 | 0.176063648 | -6.173456408 | 6.68E-10       | 3.96E-09    |
| Vmn1r24       | 0.337450552 | -1.087489236 | 3.625981427 | -0.299915832 | 0.764241358 NA |             |
| Nmb           | 18.51416589 | -1.087497052 | 0.579924819 | -1.875237991 | 0.06075999     | 0.099911317 |
| Omg           | 0.337483738 | -1.087580221 | 3.625979443 | -0.299941089 | 0.764222092 NA |             |
| Kcnma1        | 19.81468904 | -1.087671929 | 0.774472831 | -1.40440295  | 0.160198893    | 0.230043019 |
| Prdm4         | 262.7593146 | -1.088056255 | 0.209972099 | -5.181908733 | 2.20E-07       | 9.68E-07    |
| Gm15068       | 0.337248676 | -1.088340713 | 3.625602787 | -0.300182005 | 0.764038331 NA |             |
| Gm15069       | 0.337248676 | -1.088340713 | 3.625602787 | -0.300182005 | 0.764038331 NA |             |
| Tctn1         | 197.665877  | -1.088802871 | 0.296858139 | -3.667754817 | 0.00024469     | 0.000691901 |
| Prkca         | 311.3597887 | -1.089178213 | 0.239181563 | -4.553771612 | 5.27E-06       | 1.94E-05    |
| Tceal1        | 29.98810471 | -1.090095124 | 0.487454002 | -2.236303571 | 0.025331893    | 0.046356602 |
| Pcyox1l       | 64.59092909 | -1.091292889 | 0.385400078 | -2.831584507 | 0.004631799    | 0.010145563 |
| Tcf15         | 3.285600727 | -1.091514824 | 1.171754299 | -0.931521928 | 0.351583647    | 0.443919272 |
| Cd2           | 14.27541595 | -1.09203202  | 0.6645546   | -1.643254023 | 0.100330387    | 0.154810377 |
| H2-Q4         | 1760.515579 | -1.092793421 | 0.150020103 | -7.284313249 | 3.23E-13       | 2.77E-12    |
| Slc38a11      | 0.750177262 | -1.093252698 | 2.358980722 | -0.463442829 | 0.643046986 NA |             |
| Usp20         | 316.6372375 | -1.093643451 | 0.302395015 | -3.61660542  | 0.000298492    | 0.000829182 |
| Mag1          | 1084.016423 | -1.093872159 | 0.216592597 | -5.050367247 | 4.41E-07       | 1.86E-06    |
| Prim2         | 104.5935404 | -1.094300303 | 0.320776045 | -3.411415279 | 0.000646266    | 0.001691623 |
| Dhrs13        | 149.2742097 | -1.09457143  | 0.223935703 | -4.887882626 | 1.02E-06       | 4.11E-06    |
| Tspan7        | 340.1051645 | -1.095566214 | 0.232115026 | -4.719928025 | 2.36E-06       | 9.03E-06    |
| Atg9b         | 4.576776152 | -1.095874628 | 0.944371352 | -1.160427649 | 0.245874735    | 0.329728678 |
| Ctnna3        | 0.786582252 | -1.0965469   | 2.349367972 | -0.466741231 | 0.640685027 NA |             |
| AW011738      | 46.97580249 | -1.09664336  | 0.324700295 | -3.377401796 | 0.000731741    | 0.00189269  |
| Rbm15b        | 423.5484631 | -1.097319736 | 0.224902915 | -4.879081872 | 1.07E-06       | 4.28E-06    |
| 3300002I08Rik | 5.20597108  | -1.097358714 | 0.962472063 | -1.140146043 | 0.254225463    | 0.339126423 |
| Ncr1          | 4.621887064 | -1.098076495 | 0.943643871 | -1.163655621 | 0.244563601    | 0.328267087 |
| Osr1          | 4.167012333 | -1.098349736 | 1.203592846 | -0.91255921  | 0.361474416    | 0.453886414 |
| Sema3a        | 14.49001526 | -1.098532477 | 0.538499492 | -2.039987957 | 0.041351525    | 0.071460801 |
| Zfp217        | 379.3222187 | -1.098556703 | 0.175977306 | -6.242604374 | 4.30E-10       | 2.61E-09    |
| Ybx3          | 831.3409581 | -1.098570025 | 0.190587626 | -5.764120399 | 8.21E-09       | 4.30E-08    |
| Tlr3          | 197.4474012 | -1.09894375  | 0.267128714 | -4.113910986 | 3.89E-05       | 0.000125414 |
| Fndc1         | 7.135849379 | -1.099320134 | 1.147019622 | -0.958414409 | 0.337853832    | 0.430055412 |
| Tle6          | 84.88795923 | -1.099686149 | 0.386291201 | -2.846780214 | 0.004416384    | 0.009717441 |
| Adamts15      | 32.34116689 | -1.100062792 | 0.730585348 | -1.505727968 | 0.132137021    | 0.19561236  |
| Sfmbt2        | 4.319760262 | -1.100408378 | 1.016519645 | -1.082525441 | 0.279019117    | 0.366493405 |
| Olfr33        | 0.341108846 | -1.100799198 | 3.305100194 | -0.333060765 | 0.739088415 NA |             |
| Gm17374       | 2.198846883 | -1.100833032 | 1.327086779 | -0.829510963 | 0.406815336    | 0.499269103 |
| Speer3        | 0.341160402 | -1.100867489 | 3.304990471 | -0.333092485 | 0.739064472 NA |             |
| 9030624G23Rik | 7.679604567 | -1.100898568 | 0.953944592 | -1.154048753 | 0.248480182    | 0.332540978 |
| Gm18407       | 0.341222633 | -1.100951507 | 3.304858544 | -0.333131204 | 0.739035246 NA |             |
| Gm9159        | 0.341307227 | -1.101067513 | 3.304681878 | -0.333184117 | 0.738995307 NA |             |
| Gm48254       | 0.341365768 | -1.101149812 | 3.304559669 | -0.333221343 | 0.738967208 NA |             |
| Rps18-ps1     | 0.341376064 | -1.101166126 | 3.304534551 | -0.333228813 | 0.73896157 NA  |             |
| Rbbp7         | 1832.844781 | -1.101171042 | 0.15435771  | -7.13389078  | 9.76E-13       | 7.99E-12    |
| Sox7          | 30.585896   | -1.101331893 | 0.392704626 | -2.804479043 | 0.005039796    | 0.010952001 |
| Agps          | 413.3186786 | -1.101760611 | 0.21126608  | -5.215037894 | 1.84E-07       | 8.22E-07    |
| Cd209c        | 29.74171325 | -1.102163732 | 0.465802792 | -2.366159565 | 0.017973696    | 0.03418672  |
| Xlr4c         | 6.026510591 | -1.10248004  | 0.874810625 | -1.260249943 | 0.207579212    | 0.286172602 |
| Clu           | 51499.8498  | -1.102905834 | 0.178019349 | -6.195426732 | 5.81E-10       | 3.47E-09    |
| Gm10163       | 54.14032749 | -1.103038175 | 0.635026173 | -1.736996396 | 0.082387807    | 0.130546271 |
| Mageh1        | 74.07106796 | -1.103494386 | 0.447086423 | -2.468190329 | 0.013579809    | 0.026619362 |
| Rpl31-ps14    | 0.81360808  | -1.10387376  | 2.048427524 | -0.538888365 | 0.589963886 NA |             |
| Gm19065       | 32.92165095 | -1.104191889 | 0.523801743 | -2.108034009 | 0.035028048    | 0.06168352  |
| Zfp831        | 4.092101152 | -1.104544518 | 1.052580566 | -1.049368146 | 0.294008713    | 0.383229646 |
| Pkn3          | 59.33076853 | -1.105096835 | 0.446333156 | -2.475946097 | 0.013288364    | 0.026117135 |
| Gm12955       | 1.514999607 | -1.105364087 | 1.796173494 | -0.615399398 | 0.538290989 NA |             |
| Pxdn          | 253.6190266 | -1.105745313 | 0.217987597 | -5.072514812 | 3.93E-07       | 1.67E-06    |





|            |             |              |             |              |                |             |
|------------|-------------|--------------|-------------|--------------|----------------|-------------|
| Bmi1       | 654.1516816 | -1.12735787  | 0.199988528 | -5.637112702 | 1.73E-08       | 8.70E-08    |
| Bricd5     | 0.370353795 | -1.12746982  | 3.23627616  | -0.348384923 | 0.727551124 NA |             |
| Nkx2-1     | 1.472381385 | -1.128743225 | 1.778353358 | -0.634712567 | 0.525615896 NA |             |
| Zfp609     | 510.3587026 | -1.128899175 | 0.213249246 | -5.293801495 | 1.20E-07       | 5.45E-07    |
| Tssk4      | 8.139866866 | -1.128997276 | 0.767147945 | -1.471681288 | 0.141106963    | 0.206577201 |
| Hipk2      | 390.9395359 | -1.12929078  | 0.231559232 | -4.876898114 | 1.08E-06       | 4.33E-06    |
| Ddx43      | 2.224649601 | -1.129355676 | 1.429485875 | -0.790043257 | 0.429502506    | 0.521150087 |
| Gm5117     | 0.355599057 | -1.129597644 | 3.62343601  | -0.311747645 | 0.755232315 NA |             |
| Krt87      | 0.355603935 | -1.129615722 | 3.623434824 | -0.311752736 | 0.755228446 NA |             |
| LT629151.5 | 0.355667347 | -1.129850583 | 3.62341942  | -0.311818879 | 0.755178175 NA |             |
| Gm8963     | 0.35573476  | -1.130100063 | 3.623403075 | -0.311889138 | 0.755124777 NA |             |
| Croc2      | 0.350099204 | -1.130475865 | 3.623387839 | -0.311994165 | 0.755044957 NA |             |
| Gnb1l      | 49.41486639 | -1.130785192 | 0.382718609 | -2.954612517 | 0.00313062     | 0.007117056 |
| Cc2d2a     | 158.6232412 | -1.130800591 | 0.396440006 | -2.852387684 | 0.004339214    | 0.009571086 |
| Mcm7       | 644.543454  | -1.131091507 | 0.248620719 | -4.54946599  | 5.38E-06       | 1.97E-05    |
| Cyp11b2    | 0.350341351 | -1.131222225 | 3.623359001 | -0.312202634 | 0.75488653 NA  |             |
| Rpl17-ps4  | 0.828819319 | -1.131603236 | 2.047373037 | -0.552709846 | 0.58046211 NA  |             |
| Tspan4     | 963.3373643 | -1.13175462  | 0.244778931 | -4.623578563 | 3.77E-06       | 1.41E-05    |
| Gm49948    | 0.350550244 | -1.131865816 | 3.623334144 | -0.3123824   | 0.754749924 NA |             |
| Rabl2      | 94.78120127 | -1.132071257 | 0.281077382 | -4.027614214 | 5.63E-05       | 0.000176968 |
| Satb1      | 23.08666271 | -1.132421082 | 0.749847393 | -1.510202066 | 0.130991872    | 0.194186907 |
| Per1       | 849.1541368 | -1.132656835 | 0.776508307 | -1.458653855 | 0.144660403    | 0.211162817 |
| Gm11438    | 0.358070694 | -1.133296042 | 3.622726374 | -0.3128296   | 0.754410126 NA |             |
| Mapk3      | 1249.74567  | -1.133368609 | 0.149790205 | -7.566373307 | 3.84E-14       | 3.62E-13    |
| Gm18665    | 0.356546286 | -1.133552396 | 3.623178883 | -0.312861284 | 0.754386053 NA |             |
| Klra1      | 1.581197486 | -1.133760907 | 1.866199903 | -0.607523827 | 0.543503335 NA |             |
| Dnajc10    | 869.8972162 | -1.133837872 | 0.199037732 | -5.696597636 | 1.22E-08       | 6.27E-08    |
| Tmem63a    | 415.2082893 | -1.134334248 | 0.23004533  | -4.930916217 | 8.18E-07       | 3.35E-06    |
| Pramef25   | 0.351096909 | -1.134381143 | 3.283767446 | -0.34545112  | 0.729755251 NA |             |
| Gm7293     | 0.351129962 | -1.134456541 | 3.283697832 | -0.345481405 | 0.729732487 NA |             |
| Lrmda      | 9.999560898 | -1.134686145 | 0.737223657 | -1.539134202 | 0.123771537    | 0.185157701 |
| Gm8858     | 0.351257421 | -1.134806102 | 3.283414163 | -0.345617715 | 0.729630031 NA |             |
| Samd9l     | 458.2594123 | -1.135100561 | 0.266636462 | -4.257109287 | 2.07E-05       | 6.96E-05    |
| Gm15733    | 0.357066631 | -1.135352108 | 3.623072635 | -0.313367195 | 0.754001705 NA |             |
| Hepacam2   | 10.99018731 | -1.135494077 | 0.566837011 | -2.003210896 | 0.045154657    | 0.077226784 |
| Hirip3     | 143.2995458 | -1.13549644  | 0.254043543 | -4.469692191 | 7.83E-06       | 2.80E-05    |
| Tespa1     | 7.307826302 | -1.136045344 | 0.89177367  | -1.273916669 | 0.20269295     | 0.280547975 |
| Zdhhc8     | 220.1290068 | -1.136570301 | 0.198699928 | -5.720033786 | 1.07E-08       | 5.51E-08    |
| Ifit3      | 407.5017623 | -1.137049304 | 0.405885343 | -2.801405183 | 0.005088059    | 0.011048431 |
| Rps6ka4    | 309.9688607 | -1.137262505 | 0.212802846 | -5.344207208 | 9.08E-08       | 4.19E-07    |
| Phf11a     | 23.73800788 | -1.137554411 | 0.527122487 | -2.158045688 | 0.03092428     | 0.055302331 |
| Fpr1       | 28.50592659 | -1.137558327 | 0.59165123  | -1.922683955 | 0.054519753    | 0.090873362 |
| Cyp2j13    | 2.053209075 | -1.137766978 | 1.469416944 | -0.774298257 | 0.438754434    | 0.529962137 |
| Trbv5      | 0.834391829 | -1.137789864 | 1.888296697 | -0.602548247 | 0.546809258 NA |             |
| Dlc1       | 1472.503276 | -1.138259716 | 0.292856784 | -3.88674526  | 0.000101597    | 0.000306771 |
| Lman1l     | 0.35525921  | -1.13894997  | 3.275238334 | -0.347745677 | 0.72803119 NA  |             |
| Meis2      | 136.8013465 | -1.139979586 | 0.286780467 | -3.975094942 | 7.04E-05       | 0.000217905 |
| F3         | 167.1242925 | -1.140212266 | 0.322435981 | -3.536243884 | 0.00040586     | 0.001102294 |
| Gm15794    | 0.849927544 | -1.140300581 | 2.774922879 | -0.410930549 | 0.681123461 NA |             |
| Tshz2      | 388.004553  | -1.140342304 | 0.276288256 | -4.127364364 | 3.67E-05       | 0.000118884 |
| Gm8221     | 0.358538758 | -1.140410107 | 3.622776972 | -0.314788936 | 0.752921913 NA |             |
| Npy1r      | 1.51346697  | -1.140538386 | 1.865453346 | -0.611400113 | 0.540934728 NA |             |
| Gm11873    | 0.358677728 | -1.140885111 | 3.622749422 | -0.314922447 | 0.752820538 NA |             |
| Tgfb1      | 821.6719883 | -1.141032719 | 0.148421432 | -7.687789443 | 1.50E-14       | 1.46E-13    |
| Gm18186    | 10.06350318 | -1.141702076 | 0.694637626 | -1.643593771 | 0.100260141    | 0.154737904 |
| Gm15302    | 0.359046595 | -1.142143912 | 3.62267659  | -0.315276256 | 0.752551911 NA |             |
| Ctnn       | 1558.955464 | -1.142351424 | 0.201628853 | -5.665614853 | 1.46E-08       | 7.43E-08    |
| Nphp1      | 143.9662801 | -1.142468359 | 0.312691836 | -3.653655864 | 0.000258533    | 0.000727905 |
| Fer1l5     | 0.359238733 | -1.142798465 | 3.622638819 | -0.315460227 | 0.752412245 NA |             |
| Pcdhb20    | 5.151272275 | -1.142893909 | 0.905907778 | -1.261600724 | 0.207092496    | 0.285755796 |
| Slc31a2    | 262.601152  | -1.142978417 | 0.216075297 | -5.289722766 | 1.23E-07       | 5.56E-07    |
| Ighv3-5    | 0.347367692 | -1.143136723 | 3.6214974   | -0.315653056 | 0.752265862 NA |             |
| Gm3325     | 13.11899044 | -1.143302898 | 0.63726725  | -1.794071322 | 0.072801786    | 0.117120397 |
| Hmox1      | 358.8980105 | -1.14367793  | 0.236747752 | -4.830786862 | 1.36E-06       | 5.39E-06    |
| Psph       | 181.7818559 | -1.143950777 | 0.291703887 | -3.921616509 | 8.80E-05       | 0.000268629 |
| Smyd4      | 92.19395658 | -1.143964256 | 0.321879133 | -3.554018071 | 0.000379393    | 0.001036522 |

|            |             |              |             |              |                |             |
|------------|-------------|--------------|-------------|--------------|----------------|-------------|
| Spdya      | 2.157737265 | -1.144432914 | 1.405747567 | -0.814109831 | 0.415582035    | 0.507728431 |
| S100a3     | 0.369762846 | -1.145079921 | 3.244190984 | -0.352963166 | 0.724116055 NA |             |
| Usp22      | 782.322585  | -1.145158184 | 0.160322649 | -7.142834719 | 9.14E-13       | 7.51E-12    |
| Gm4518     | 0.850724426 | -1.145414599 | 2.075677099 | -0.551826968 | 0.581066909 NA |             |
| Lins1      | 160.2997876 | -1.145678826 | 0.28898012  | -3.964559321 | 7.35E-05       | 0.000227178 |
| Azin2      | 46.55341693 | -1.146043524 | 0.370904767 | -3.089859246 | 0.002002514    | 0.00473165  |
| Vcckmt     | 61.7186173  | -1.146360828 | 0.312239092 | -3.671419945 | 0.000241207    | 0.000682845 |
| Bmp2k      | 244.9646627 | -1.146546064 | 0.223516502 | -5.129581279 | 2.90E-07       | 1.26E-06    |
| Luzp1      | 503.115277  | -1.147079708 | 0.250621097 | -4.577017259 | 4.72E-06       | 1.74E-05    |
| Gm5628     | 0.851056547 | -1.147615012 | 2.041404987 | -0.562169202 | 0.574000743 NA |             |
| Shisa7     | 5.666518912 | -1.148184563 | 1.187391289 | -0.966980787 | 0.333553638    | 0.425694148 |
| Vwa7       | 20.13131351 | -1.148226453 | 0.528149335 | -2.174056422 | 0.029700898    | 0.05331588  |
| Fbln5      | 132.0489901 | -1.148797964 | 0.2921784   | -3.931837412 | 8.43E-05       | 0.000258523 |
| Plxdc1     | 15.00093834 | -1.149938434 | 0.52503442  | -2.190215328 | 0.028508624    | 0.051462836 |
| Limk1      | 108.1600775 | -1.150963341 | 0.24978377  | -4.607838777 | 4.07E-06       | 1.52E-05    |
| Gm48590    | 0.864509738 | -1.150997526 | 1.885751368 | -0.610365473 | 0.541619734 NA |             |
| Dsel       | 26.25457143 | -1.151734511 | 0.485001332 | -2.37470381  | 0.017563037    | 0.033487827 |
| Swap70     | 245.5083542 | -1.152384451 | 0.18399111  | -6.263261596 | 3.77E-10       | 2.30E-09    |
| Pdlim1     | 876.1001452 | -1.152424247 | 0.299422265 | -3.848826163 | 0.000118685    | 0.000353855 |
| Cntd1      | 9.734546163 | -1.152749943 | 0.652025181 | -1.767953104 | 0.077068744    | 0.123102028 |
| Trim17     | 1.483276383 | -1.152784266 | 1.850895254 | -0.622825232 | 0.533399375 NA |             |
| ltga5      | 1035.327429 | -1.152845966 | 0.1943439   | -5.93198946  | 2.99E-09       | 1.65E-08    |
| Fbx14      | 323.3678277 | -1.153761138 | 0.217253868 | -5.310658671 | 1.09E-07       | 5.00E-07    |
| Ccin       | 0.362840096 | -1.154079787 | 3.621962508 | -0.31863383  | 0.750004197 NA |             |
| Gm5525     | 0.362877985 | -1.154221746 | 3.621952983 | -0.318673862 | 0.749973837 NA |             |
| Synb       | 1.952591193 | -1.15429973  | 1.765878916 | -0.653668674 | 0.513325289    | 0.602324285 |
| Olfr733    | 0.35728372  | -1.154320141 | 3.271000855 | -0.35289509  | 0.724167092 NA |             |
| Glra2      | 0.35728875  | -1.154328695 | 3.270991424 | -0.352898722 | 0.724164369 NA |             |
| Gm11594    | 0.356609197 | -1.154426749 | 3.621427209 | -0.318776737 | 0.74989582 NA  |             |
| Rpl7a-ps10 | 0.357453815 | -1.15461124  | 3.270682033 | -0.353018492 | 0.724074577 NA |             |
| Gm13988    | 0.357652759 | -1.154939931 | 3.270315852 | -0.353158527 | 0.723969597 NA |             |
| Gm47753    | 0.357660463 | -1.154954897 | 3.27030086  | -0.353164723 | 0.723964953 NA |             |
| Gm9354     | 0.357655834 | -1.154960431 | 3.270304215 | -0.353166053 | 0.723963956 NA |             |
| Gm48979    | 0.357763087 | -1.155143294 | 3.270105629 | -0.353243419 | 0.723905959 NA |             |
| Smad3      | 574.5219126 | -1.155479799 | 0.190853704 | -6.054269713 | 1.41E-09       | 8.05E-09    |
| Fam81b     | 0.342332841 | -1.15550774  | 3.619510102 | -0.319244237 | 0.749541314 NA |             |
| Galns      | 334.471415  | -1.155736913 | 0.212227466 | -5.445746176 | 5.16E-08       | 2.45E-07    |
| Nsd2       | 602.3211377 | -1.155835732 | 0.254161157 | -4.547649003 | 5.42E-06       | 1.99E-05    |
| Rims4      | 5.070524458 | -1.157191212 | 1.002601591 | -1.154188486 | 0.248422902    | 0.332530907 |
| Setx       | 526.9625251 | -1.158592787 | 0.258002619 | -4.49062414  | 7.10E-06       | 2.56E-05    |
| Tbxa2r     | 19.48878922 | -1.158724425 | 0.476016572 | -2.434210265 | 0.014924323    | 0.028965147 |
| Atp2a3     | 60.54636149 | -1.158959999 | 0.390793517 | -2.965658201 | 0.00302036     | 0.006883836 |
| Gm13216    | 0.365515907 | -1.159026421 | 3.327396691 | -0.348328296 | 0.727593645 NA |             |
| Gm6394     | 0.365520145 | -1.159034064 | 3.327388171 | -0.348331485 | 0.727591251 NA |             |
| Gm18913    | 0.365538924 | -1.159088099 | 3.327354469 | -0.348351253 | 0.727576407 NA |             |
| Olfr1303   | 0.365545163 | -1.159104132 | 3.327342887 | -0.348357284 | 0.727571878 NA |             |
| Pap0lb     | 0.365548019 | -1.15911144  | 3.327337581 | -0.348360036 | 0.727569812 NA |             |
| Mapk8ip2   | 0.365549626 | -1.159115546 | 3.327334594 | -0.348361583 | 0.72756865 NA  |             |
| Hoxa4      | 5.271379438 | -1.159383342 | 0.968359255 | -1.197265801 | 0.23120297     | 0.313617777 |
| Slc39a4    | 2655.217694 | -1.159448042 | 0.22860283  | -5.071888405 | 3.94E-07       | 1.67E-06    |
| Smc1b      | 3.8929004   | -1.159578497 | 1.325741847 | -0.874663872 | 0.381756823    | 0.4738311   |
| Gm5835     | 1.546482366 | -1.159628444 | 1.506449626 | -0.769775786 | 0.441432906 NA |             |
| Fzd6       | 211.0023666 | -1.160563995 | 0.262627705 | -4.419046325 | 9.91E-06       | 3.51E-05    |
| Myo9b      | 1181.818891 | -1.160859958 | 0.20043582  | -5.791679153 | 6.97E-09       | 3.67E-08    |
| Shisal2a   | 0.340743109 | -1.161044632 | 3.62162726  | -0.320586451 | 0.748523806 NA |             |
| Hmgn1      | 1833.27305  | -1.16170944  | 0.167110791 | -6.951732034 | 3.61E-12       | 2.78E-11    |
| Pfn2       | 86.15778277 | -1.161974011 | 0.375707211 | -3.092764732 | 0.001983013    | 0.004690773 |
| Gm14117    | 14.54241911 | -1.162195212 | 1.2327414   | -0.942772923 | 0.345797065    | 0.438073    |
| Gm18577    | 0.941512471 | -1.16230421  | 2.265081844 | -0.51314005  | 0.607853358 NA |             |
| Ifit3b     | 95.00383252 | -1.16271006  | 0.492215446 | -2.362197429 | 0.018166964    | 0.034522328 |
| Rrm1       | 419.0844478 | -1.162886067 | 0.338146845 | -3.438997244 | 0.000583873    | 0.001542421 |
| Tle3       | 658.9124679 | -1.162899758 | 0.198412266 | -5.861027568 | 4.60E-09       | 2.48E-08    |
| Serpnb6c   | 0.365049271 | -1.162987216 | 3.621379248 | -0.321144828 | 0.74810064 NA  |             |
| Cav3       | 0.341263313 | -1.16330799  | 3.621449527 | -0.321227172 | 0.748038242 NA |             |
| Arid5a     | 95.70796879 | -1.163598263 | 0.342989277 | -3.392520814 | 0.000692527    | 0.001799451 |
| Macroh2a2  | 18.51951415 | -1.164023769 | 0.543469008 | -2.1418402   | 0.032206343    | 0.057336439 |

|               |             |              |             |              |             |             |
|---------------|-------------|--------------|-------------|--------------|-------------|-------------|
| Ednrb         | 214.1596538 | -1.16423603  | 0.289162181 | -4.02623893  | 5.67E-05    | 0.00017794  |
| Bspry         | 23.87520477 | -1.164631634 | 0.570488961 | -2.041462174 | 0.04120491  | 0.071250766 |
| Gm6286        | 2.279286428 | -1.165344405 | 1.670697128 | -0.697519847 | 0.485477523 | 0.575831129 |
| Bcl2l1        | 1123.836571 | -1.165858839 | 0.287015957 | -4.062000078 | 4.87E-05    | 0.000154461 |
| Armh1         | 1.219938305 | -1.165986658 | 1.922346705 | -0.606543375 | 0.544153989 | NA          |
| Map7d3        | 2.940069817 | -1.166649357 | 1.327367539 | -0.878919608 | 0.379444866 | 0.471382065 |
| Nup93         | 211.4276232 | -1.166655286 | 0.199166126 | -5.857699339 | 4.69E-09    | 2.52E-08    |
| Gm15807       | 2.244100452 | -1.167322025 | 1.822818408 | -0.64039403  | 0.521916463 | 0.610388411 |
| Fbxl2         | 3.273985597 | -1.167408583 | 1.302077119 | -0.896574071 | 0.369946239 | 0.462141385 |
| Adra2b        | 87.60238148 | -1.167414915 | 0.684027044 | -1.706679474 | 0.087881644 | 0.138364081 |
| Drosha        | 405.175322  | -1.168100461 | 0.194298366 | -6.011890287 | 1.83E-09    | 1.03E-08    |
| Prr15         | 14.51494576 | -1.168486859 | 0.623653243 | -1.873616264 | 0.060983335 | 0.10020664  |
| Fcgbp         | 15.65046852 | -1.168720284 | 0.745772619 | -1.567126834 | 0.117085048 | 0.17670555  |
| Nek11         | 3.735696958 | -1.169692351 | 0.993872811 | -1.17690346  | 0.239234041 | 0.322663127 |
| Trim13        | 58.02785277 | -1.169816549 | 0.335858034 | -3.483068535 | 0.000495701 | 0.001326435 |
| Gm6977        | 0.871860438 | -1.170074462 | 2.075144746 | -0.563851974 | 0.572854877 | NA          |
| Gper1         | 4.231210133 | -1.170211156 | 1.032577312 | -1.133291563 | 0.257091834 | 0.341995222 |
| Ifitm5        | 7.504532406 | -1.170258496 | 0.737914522 | -1.585899803 | 0.11276204  | 0.171150932 |
| Pld2          | 319.9003815 | -1.17137764  | 0.257107417 | -4.555985406 | 5.21E-06    | 1.92E-05    |
| Spryd3        | 580.0812102 | -1.17163179  | 0.210027959 | -5.578456297 | 2.43E-08    | 1.20E-07    |
| Gm48552       | 7.28176657  | -1.171636764 | 0.789511912 | -1.484001378 | 0.137808555 | 0.202531056 |
| Cxadr         | 2727.479104 | -1.171819227 | 0.150394047 | -7.791659637 | 6.61E-15    | 6.70E-14    |
| Mrv1          | 54.93127239 | -1.172107535 | 0.367250755 | -3.19157284  | 0.001415004 | 0.003461968 |
| Eif2ak3       | 492.2832525 | -1.172617342 | 0.182626979 | -6.420833053 | 1.36E-10    | 8.73E-10    |
| Nin           | 129.3989655 | -1.172685493 | 0.269506274 | -4.351236331 | 1.35E-05    | 4.68E-05    |
| Stk36         | 39.39894175 | -1.172871262 | 0.515119863 | -2.276889998 | 0.022792795 | 0.042249818 |
| 4930548H24Rik | 2.641699854 | -1.173097858 | 1.523587542 | -0.769957633 | 0.441325025 | 0.532501169 |
| Ephb6         | 25.78465265 | -1.173719346 | 0.648706399 | -1.809322903 | 0.070400853 | 0.113708549 |
| Nt5dc2        | 197.4339122 | -1.173958366 | 0.236149566 | -4.971249308 | 6.65E-07    | 2.75E-06    |
| Plec          | 2774.409429 | -1.174598598 | 0.200773886 | -5.850355441 | 4.91E-09    | 2.63E-08    |
| Ppp1r14c      | 1.764129159 | -1.175132999 | 1.498893975 | -0.784000081 | 0.433040063 | 0.524360181 |
| Gfpt1         | 730.6442267 | -1.175382061 | 0.196977351 | -5.967092438 | 2.42E-09    | 1.34E-08    |
| Tpd52         | 654.4241821 | -1.175555676 | 0.218571731 | -5.37835186  | 7.52E-08    | 3.50E-07    |
| Hdgf13        | 24.87007379 | -1.175709202 | 0.447308091 | -2.628410316 | 0.008578497 | 0.017705354 |
| Gm20422       | 3.054597537 | -1.176406858 | 1.465571194 | -0.802695129 | 0.422150969 | 0.513949134 |
| Gm49686       | 0.832977193 | -1.176831275 | 2.716653389 | -0.433191544 | 0.664875622 | NA          |
| 2610042L04Rik | 0.369361428 | -1.177883273 | 3.620555703 | -0.325332178 | 0.74492968  | NA          |
| Ankk1         | 0.369361428 | -1.177883273 | 3.620555703 | -0.325332178 | 0.74492968  | NA          |
| Gm10722       | 0.369361428 | -1.177883273 | 3.620555703 | -0.325332178 | 0.74492968  | NA          |
| Gm11980       | 0.369361428 | -1.177883273 | 3.620555703 | -0.325332178 | 0.74492968  | NA          |
| Gm12166       | 0.369361428 | -1.177883273 | 3.620555703 | -0.325332178 | 0.74492968  | NA          |
| Gm31520       | 0.369361428 | -1.177883273 | 3.620555703 | -0.325332178 | 0.74492968  | NA          |
| Gm3252        | 0.369361428 | -1.177883273 | 3.620555703 | -0.325332178 | 0.74492968  | NA          |
| Gm42776       | 0.369361428 | -1.177883273 | 3.620555703 | -0.325332178 | 0.74492968  | NA          |
| Gm47893       | 0.369361428 | -1.177883273 | 3.620555703 | -0.325332178 | 0.74492968  | NA          |
| Gm4825        | 0.369361428 | -1.177883273 | 3.620555703 | -0.325332178 | 0.74492968  | NA          |
| Gm49105       | 0.369361428 | -1.177883273 | 3.620555703 | -0.325332178 | 0.74492968  | NA          |
| Gm7647        | 0.369361428 | -1.177883273 | 3.620555703 | -0.325332178 | 0.74492968  | NA          |
| Nutf2-ps2     | 0.369361428 | -1.177883273 | 3.620555703 | -0.325332178 | 0.74492968  | NA          |
| Obox3-ps7     | 0.369361428 | -1.177883273 | 3.620555703 | -0.325332178 | 0.74492968  | NA          |
| Olfr54        | 0.369361428 | -1.177883273 | 3.620555703 | -0.325332178 | 0.74492968  | NA          |
| Scn11a        | 0.369361428 | -1.177883273 | 3.620555703 | -0.325332178 | 0.74492968  | NA          |
| Trav6-4       | 0.369361428 | -1.177883273 | 3.620555703 | -0.325332178 | 0.74492968  | NA          |
| Trav6-7-dv9   | 0.369361428 | -1.177883273 | 3.620555703 | -0.325332178 | 0.74492968  | NA          |
| Gpr26         | 0.364488604 | -1.178080761 | 3.620546376 | -0.325387563 | 0.744887767 | NA          |
| Mylk2         | 0.364599325 | -1.178410758 | 3.620534175 | -0.325479805 | 0.744817964 | NA          |
| Gm20637       | 1.757203858 | -1.178529969 | 1.576378836 | -0.747618493 | 0.454690307 | 0.545538768 |
| Ezh2          | 229.7787115 | -1.178944295 | 0.339433527 | -3.473270031 | 0.000514158 | 0.00137023  |
| Calu          | 2577.598129 | -1.179182137 | 0.166575832 | -7.078950891 | 1.45E-12    | 1.17E-11    |
| Gm4613        | 0.364880214 | -1.179247631 | 3.620503244 | -0.325713734 | 0.744640952 | NA          |
| Plagl2        | 202.6718407 | -1.179476746 | 0.192281267 | -6.134121971 | 8.56E-10    | 5.03E-09    |
| Gm44790       | 0.365090047 | -1.179872524 | 3.620480158 | -0.325888411 | 0.744508784 | NA          |
| Arhgap17      | 470.262322  | -1.180046028 | 0.162121388 | -7.278780685 | 3.37E-13    | 2.88E-12    |
| Gm10651       | 0.365348285 | -1.180641249 | 3.620451769 | -0.326103294 | 0.744346205 | NA          |
| Atf3          | 190.7207794 | -1.181115272 | 0.508786935 | -2.321433962 | 0.020263434 | 0.038028515 |
| Entpd7        | 90.82589711 | -1.181706951 | 0.301763664 | -3.916001464 | 9.00E-05    | 0.00027437  |

|               |             |              |             |              |             |    |             |
|---------------|-------------|--------------|-------------|--------------|-------------|----|-------------|
| Gm15198       | 0.372635082 | -1.181708476 | 3.313817784 | -0.356600318 | 0.721391039 | NA |             |
| Cpd           | 980.6276208 | -1.181936128 | 0.193269726 | -6.115474743 | 9.63E-10    |    | 5.63E-09    |
| Gm4953        | 0.372747154 | -1.181936662 | 3.313603752 | -0.356692203 | 0.721322244 | NA |             |
| Gm45777       | 0.37275002  | -1.181938279 | 3.313597536 | -0.356693372 | 0.721321368 | NA |             |
| Rpl29-ps1     | 0.372749172 | -1.181942242 | 3.313600169 | -0.356694285 | 0.721320685 | NA |             |
| Gm9308        | 0.372751541 | -1.181945156 | 3.313595306 | -0.356695687 | 0.721319634 | NA |             |
| Gm11878       | 0.372758548 | -1.181959167 | 3.313581884 | -0.356701361 | 0.721315387 | NA |             |
| Lhfp12        | 122.4880341 | -1.182196985 | 0.261512257 | -4.520617876 | 6.17E-06    |    | 2.25E-05    |
| Zbed4         | 341.5888142 | -1.182587945 | 0.273134039 | -4.329698156 | 1.49E-05    |    | 5.13E-05    |
| Samd13        | 1.492907812 | -1.182599349 | 1.879966231 | -0.629053506 | 0.529314028 | NA |             |
| Elmo2         | 401.847038  | -1.182960873 | 0.31057531  | -3.808934055 | 0.000139567 |    | 0.000411936 |
| 6030468B19Rik | 1.51088865  | -1.183032912 | 1.902881167 | -0.621706143 | 0.534135111 | NA |             |
| Acot6         | 50.72257071 | -1.1831128   | 0.44963577  | -2.631269308 | 0.00850666  |    | 0.017589028 |
| Slc5a5        | 1.542996921 | -1.183150616 | 1.81658453  | -0.651305016 | 0.514849611 | NA |             |
| Efhc1         | 6.089930736 | -1.18368013  | 0.948139644 | -1.248423835 | 0.211875885 |    | 0.291083898 |
| Eva1b         | 161.9367744 | -1.183805935 | 0.258530837 | -4.578973831 | 4.67E-06    |    | 1.73E-05    |
| Mapre2        | 390.6476883 | -1.184235561 | 0.148574452 | -7.97065406  | 1.58E-15    |    | 1.70E-14    |
| Tia1          | 550.5892222 | -1.184461762 | 0.183370745 | -6.45938238  | 1.05E-10    |    | 6.85E-10    |
| Myom1         | 40.66943411 | -1.184700728 | 0.413091729 | -2.867887796 | 0.004132221 |    | 0.009152409 |
| Gm14741       | 0.371582885 | -1.184732221 | 3.620152544 | -0.327260304 | 0.743471014 | NA |             |
| Pcna          | 980.1403652 | -1.185289392 | 0.285855685 | -4.146460796 | 3.38E-05    |    | 0.000109937 |
| Gm4898        | 3.977332625 | -1.185375956 | 1.140563223 | -1.039290003 | 0.298669883 |    | 0.388177492 |
| Ski           | 856.4339209 | -1.185418054 | 0.147749833 | -8.023143088 | 1.03E-15    |    | 1.13E-14    |
| Al429214      | 17.62870316 | -1.185636978 | 0.493874757 | -2.400683495 | 0.016364484 |    | 0.031452228 |
| Cilp          | 15.19559123 | -1.185715753 | 0.760446242 | -1.559236783 | 0.118940348 |    | 0.17904592  |
| Eya4          | 25.58701676 | -1.18703069  | 0.550797086 | -2.155114325 | 0.031152889 |    | 0.055676114 |
| Tctex1d2      | 67.10557854 | -1.187243266 | 0.337919566 | -3.513390121 | 0.000442427 |    | 0.00119249  |
| Gm20661       | 1.693993673 | -1.187604146 | 1.496630752 | -0.793518471 | 0.427475812 |    | 0.519467363 |
| Bcor          | 350.1580694 | -1.187782416 | 0.242146408 | -4.905224175 | 9.33E-07    |    | 3.78E-06    |
| Slc10a2       | 613.642692  | -1.187930307 | 0.27894945  | -4.258586305 | 2.06E-05    |    | 6.92E-05    |
| Gm8909        | 1.977304077 | -1.187993015 | 1.424792647 | -0.833800635 | 0.404393337 |    | 0.497194405 |
| Lrch2         | 5.816110488 | -1.188288017 | 1.052183863 | -1.129353965 | 0.258748544 |    | 0.343707744 |
| Capn6         | 31.71088367 | -1.188315644 | 0.45067249  | -2.636761    | 0.008370178 |    | 0.017323637 |
| Hoxa3         | 17.9486784  | -1.188885702 | 0.486570522 | -2.443398536 | 0.01454966  |    | 0.028344487 |
| Gm10812       | 0.877369502 | -1.189483744 | 2.305523885 | -0.515927747 | 0.605904874 | NA |             |
| Fam234b       | 1211.846406 | -1.189628363 | 0.174022446 | -6.836062744 | 8.14E-12    |    | 6.02E-11    |
| Ttc3          | 678.9152948 | -1.189942772 | 0.204620611 | -5.815361254 | 6.05E-09    |    | 3.21E-08    |
| Rpl19-ps1     | 2.560221276 | -1.190057579 | 1.465869007 | -0.811844423 | 0.416880908 |    | 0.508699675 |
| Ccdc148       | 46.78654824 | -1.190737993 | 0.379568498 | -3.137083289 | 0.001706376 |    | 0.004096072 |
| Lbp           | 3587.106928 | -1.191489333 | 0.373882477 | -3.186801753 | 0.001438553 |    | 0.00351454  |
| Trgv4         | 0.373477602 | -1.191528232 | 3.619774559 | -0.329171945 | 0.742025727 | NA |             |
| Malrd1        | 0.875067037 | -1.193165937 | 2.765723381 | -0.431411885 | 0.66616891  | NA |             |
| Olfr920       | 20.57790249 | -1.193314204 | 0.531252658 | -2.246227263 | 0.024689455 |    | 0.045317165 |
| Donson        | 94.54738904 | -1.193464271 | 0.27698368  | -4.308789138 | 1.64E-05    |    | 5.61E-05    |
| Dync2h1       | 103.3993246 | -1.193692095 | 0.282752944 | -4.221678757 | 2.42E-05    |    | 8.08E-05    |
| Myh10         | 757.5017469 | -1.194128848 | 0.297080229 | -4.01955005  | 5.83E-05    |    | 0.000182731 |
| Bclaf3        | 94.74537483 | -1.194195537 | 0.426972736 | -2.796889441 | 0.005159719 |    | 0.01118267  |
| Rhebl1        | 26.90473387 | -1.19443736  | 0.497132968 | -2.402651679 | 0.016276683 |    | 0.031301172 |
| Fes           | 336.6674379 | -1.195078924 | 0.197017463 | -6.065852777 | 1.31E-09    |    | 7.54E-09    |
| Nt5c2         | 527.509724  | -1.19532752  | 0.215551415 | -5.545440366 | 2.93E-08    |    | 1.43E-07    |
| Sult6b2       | 1.855102997 | -1.195431462 | 1.944051135 | -0.614917705 | 0.53860907  |    | 0.62578937  |
| Gm7418        | 0.374641878 | -1.195544762 | 3.619530678 | -0.330303807 | 0.741170417 | NA |             |
| Vmn1r49       | 4.088814288 | -1.195957665 | 1.052175758 | -1.136651985 | 0.255683799 |    | 0.340698562 |
| Fut1          | 10.40264046 | -1.19638625  | 0.687157086 | -1.741066596 | 0.081671906 |    | 0.12956833  |
| Spatc11       | 0.921210738 | -1.196505058 | 2.015676916 | -0.593599623 | 0.552779933 | NA |             |
| Kif1a         | 22.51448976 | -1.196515597 | 0.562377153 | -2.127603495 | 0.033369972 |    | 0.059124016 |
| Stmnd1        | 0.375060505 | -1.196978159 | 3.619444544 | -0.330707694 | 0.74086529  | NA |             |
| Gm29427       | 40.61615726 | -1.196991378 | 0.586656816 | -2.04036047  | 0.041314436 |    | 0.071411184 |
| Lonrf2        | 0.375427856 | -1.198231512 | 3.619369606 | -0.331060832 | 0.740598537 | NA |             |
| Olfr23        | 0.932808844 | -1.198899871 | 2.25524402  | -0.531605387 | 0.594999333 | NA |             |
| Cyp3a63-ps    | 2.241726335 | -1.199285253 | 2.044345614 | -0.586635276 | 0.557448686 |    | 0.642598228 |
| Ar12bp        | 299.1567178 | -1.200921258 | 0.234866579 | -5.113206244 | 3.17E-07    |    | 1.37E-06    |
| Gm14277       | 0.3788259   | -1.201468458 | 3.302460245 | -0.36381012  | 0.715999805 | NA |             |
| Rpl31-ps6     | 0.3788369   | -1.201493594 | 3.302440694 | -0.363819885 | 0.715992513 | NA |             |
| Gm6686        | 0.378861101 | -1.201554674 | 3.30239884  | -0.363842992 | 0.715975257 | NA |             |
| Retnlb        | 0.378888988 | -1.201613567 | 3.302348309 | -0.363866393 | 0.715957781 | NA |             |



|               |             |              |             |              |             |    |             |
|---------------|-------------|--------------|-------------|--------------|-------------|----|-------------|
| Gm5045        | 0.378899836 | -1.201638871 | 3.302329136 | -0.363876168 | 0.715950482 | NA |             |
| Gm6382        | 0.378908386 | -1.201658816 | 3.302314024 | -0.363883873 | 0.715944728 | NA |             |
| Gm5778        | 0.378914405 | -1.201672855 | 3.302303387 | -0.363889296 | 0.715940678 | NA |             |
| Mlc1          | 0.378938153 | -1.201728251 | 3.302261424 | -0.363910695 | 0.715924698 | NA |             |
| Gm5939        | 0.378938594 | -1.201729281 | 3.302260643 | -0.363911093 | 0.715924401 | NA |             |
| Dvl2          | 174.8184825 | -1.202690128 | 0.224843034 | -5.349021078 | 8.84E-08    |    | 4.08E-07    |
| Afap1l1       | 87.37745433 | -1.203440903 | 0.332232338 | -3.622287076 | 0.00029201  |    | 0.000812754 |
| Ints6l        | 205.0541303 | -1.205281501 | 0.373093187 | -3.230510611 | 0.001235693 |    | 0.003062521 |
| Rhobtb3       | 239.5819228 | -1.205484659 | 0.307041245 | -3.926132662 | 8.63E-05    |    | 0.000264097 |
| Tbc1d19       | 134.4552164 | -1.20593541  | 0.411672962 | -2.929352957 | 0.003396685 |    | 0.00766584  |
| Il18r1        | 20.08088376 | -1.206147687 | 0.600973019 | -2.006991409 | 0.044750578 |    | 0.076612558 |
| Fcrl1         | 16.2456604  | -1.206246194 | 0.49884568  | -2.418074852 | 0.015602867 |    | 0.03017215  |
| Gm5641        | 1933.724489 | -1.20695686  | 0.211790663 | -5.698819981 | 1.21E-08    |    | 6.19E-08    |
| Pogk          | 243.418386  | -1.208174584 | 0.279943063 | -4.315786828 | 1.59E-05    |    | 5.44E-05    |
| Myo1d         | 396.0080173 | -1.208315228 | 0.238443976 | -5.067501596 | 4.03E-07    |    | 1.71E-06    |
| Olfr149       | 3.102421342 | -1.208791044 | 1.186795782 | -1.018533316 | 0.308424576 |    | 0.399030293 |
| Arf6          | 707.9976108 | -1.209635488 | 0.122309975 | -9.889916874 | 4.60E-23    |    | 9.21E-22    |
| Olfr691       | 3.980982385 | -1.20986627  | 1.020150071 | -1.185968912 | 0.235634577 |    | 0.318539233 |
| Zc3h7b        | 1569.492733 | -1.209910927 | 0.190126099 | -6.363728788 | 1.97E-10    |    | 1.24E-09    |
| Sacs          | 50.83626762 | -1.209968633 | 0.413046427 | -2.92937683  | 0.003396424 |    | 0.00766584  |
| Maf           | 760.1618941 | -1.210472182 | 0.222179814 | -5.448164541 | 5.09E-08    |    | 2.41E-07    |
| Cux2          | 221.6847717 | -1.210593481 | 0.401383904 | -3.016048897 | 0.00256092  |    | 0.005919002 |
| Gm5228        | 0.356728953 | -1.211761648 | 3.618715787 | -0.33485958  | 0.737731014 | NA |             |
| Gm5555        | 0.970489327 | -1.212073544 | 3.266956549 | -0.371009998 | 0.710630085 | NA |             |
| Gm50387       | 93.12798978 | -1.212368937 | 0.326179203 | -3.716879936 | 0.000201698 |    | 0.000578783 |
| Unc13d        | 61.09126217 | -1.212395847 | 0.329287735 | -3.68460686  | 0.000229056 |    | 0.000651041 |
| Sgsm2         | 262.6806558 | -1.213374875 | 0.170527128 | -7.115436064 | 1.12E-12    |    | 9.07E-12    |
| Lyve1         | 77.43507017 | -1.213402121 | 0.625801368 | -1.938957285 | 0.05250654  |    | 0.088010878 |
| Smarcd1       | 328.4105982 | -1.214596775 | 0.183685122 | -6.612385151 | 3.78E-11    |    | 2.59E-10    |
| Slc6a4        | 6.752639505 | -1.215883283 | 0.729817243 | -1.666010628 | 0.095711298 |    | 0.148740766 |
| Tekt4         | 0.357665157 | -1.21598185  | 3.618367765 | -0.336058115 | 0.736827043 | NA |             |
| Olfr597       | 0.357754856 | -1.216382828 | 3.61833497  | -0.336171979 | 0.736741182 | NA |             |
| Rbfox2        | 880.4681986 | -1.216393353 | 0.170303514 | -7.142502979 | 9.16E-13    |    | 7.52E-12    |
| Sall2         | 172.2662178 | -1.217452324 | 0.332786019 | -3.658363792 | 0.000253831 |    | 0.000715257 |
| Mfap3         | 347.3992755 | -1.217726374 | 0.20401065  | -5.968935322 | 2.39E-09    |    | 1.33E-08    |
| Gm6793        | 0.363608836 | -1.217915747 | 3.618258621 | -0.336602735 | 0.736416394 | NA |             |
| Gm15544       | 0.363620801 | -1.21794677  | 3.618258055 | -0.336611361 | 0.73640989  | NA |             |
| Rnf157        | 27.26061767 | -1.218206289 | 0.440135521 | -2.767798166 | 0.005643639 |    | 0.012134288 |
| Naiip5        | 113.0222032 | -1.218672328 | 0.234581218 | -5.195097619 | 2.05E-07    |    | 9.09E-07    |
| Mest          | 53.24805393 | -1.219100657 | 0.573364254 | -2.126223683 | 0.033484639 |    | 0.059290208 |
| Gm13238       | 0.381956722 | -1.21944823  | 3.618159345 | -0.337035524 | 0.736090121 | NA |             |
| Olfr592       | 0.381852926 | -1.219573457 | 3.61814182  | -0.337071767 | 0.7360628   | NA |             |
| Ung           | 133.7372413 | -1.220046252 | 0.276956779 | -4.405186455 | 1.06E-05    |    | 3.72E-05    |
| Rnf219        | 57.94090011 | -1.220075958 | 0.312960021 | -3.898504205 | 9.68E-05    |    | 0.000293447 |
| Aldoart1      | 0.382097407 | -1.220366722 | 3.618097772 | -0.33729512  | 0.735894438 | NA |             |
| Topbp1        | 377.4173908 | -1.220556493 | 0.247546337 | -4.930618277 | 8.20E-07    |    | 3.35E-06    |
| Lrch1         | 292.1610733 | -1.220587416 | 0.265294834 | -4.600871401 | 4.21E-06    |    | 1.56E-05    |
| Gm4870        | 0.382297924 | -1.220640924 | 3.61808636  | -0.33737197  | 0.735836512 | NA |             |
| Ccrl2         | 43.51377066 | -1.221139687 | 0.449970395 | -2.713822287 | 0.006651184 |    | 0.014068161 |
| Ccnb1-ps      | 0.382345677 | -1.221171037 | 3.618053217 | -0.33752158  | 0.735723747 | NA |             |
| Sost          | 0.382493084 | -1.221298085 | 3.618046213 | -0.337557348 | 0.735696789 | NA |             |
| Smim5         | 6.152587354 | -1.221698203 | 0.934263348 | -1.307659351 | 0.190988876 |    | 0.266817862 |
| Zfp354c       | 21.23755114 | -1.22252578  | 0.823115138 | -1.485242737 | 0.137479535 |    | 0.202152071 |
| Slamf1        | 3.61217873  | -1.22275347  | 0.993156433 | -1.231179127 | 0.218255876 |    | 0.2986936   |
| Spry2         | 30.3560222  | -1.223317879 | 0.437375392 | -2.796951774 | 0.005158723 |    | 0.011181934 |
| Disc1         | 10.2874254  | -1.223715908 | 0.666035798 | -1.837312515 | 0.066163773 |    | 0.107660591 |
| Olfr44        | 0.912012923 | -1.223880967 | 2.115059498 | -0.578650845 | 0.562824789 | NA |             |
| 4930503L19Rik | 122.7954212 | -1.224145827 | 0.401647012 | -3.047815099 | 0.002305117 |    | 0.005382501 |
| Ldb2          | 79.40060278 | -1.224589927 | 0.281474792 | -4.350620245 | 1.36E-05    |    | 4.69E-05    |
| Gna14         | 163.2192211 | -1.225109323 | 0.480630354 | -2.548963692 | 0.010804355 |    | 0.021754121 |
| Il31ra        | 2.576550231 | -1.225618936 | 1.571864065 | -0.779723237 | 0.435553798 |    | 0.526954876 |
| Akr1b3        | 323.9891714 | -1.225660143 | 0.27910884  | -4.391334019 | 1.13E-05    |    | 3.94E-05    |
| Gm21748       | 2.608976901 | -1.226468684 | 1.2367296   | -0.991703186 | 0.321342337 |    | 0.412699186 |
| Gm21860       | 2.608976901 | -1.226468684 | 1.2367296   | -0.991703186 | 0.321342337 |    | 0.412699186 |
| Fbxo5         | 53.86968472 | -1.22728597  | 0.423496664 | -2.897982617 | 0.003755714 |    | 0.008389336 |
| Gng7          | 23.09897165 | -1.227782756 | 0.55509118  | -2.211857798 | 0.026976492 |    | 0.049017404 |

|               |             |              |             |              |                |             |
|---------------|-------------|--------------|-------------|--------------|----------------|-------------|
| MyliP         | 172.9173888 | -1.227909672 | 0.310987335 | -3.948423408 | 7.87E-05       | 0.00024208  |
| Gskip         | 267.7043803 | -1.229490551 | 0.363761237 | -3.37993834  | 0.000725021    | 0.001876162 |
| Gm44965       | 0.385235878 | -1.229542158 | 3.617559821 | -0.339881638 | 0.733945665 NA |             |
| Dagla         | 51.6295037  | -1.229855166 | 0.462376777 | -2.659854965 | 0.007817431    | 0.016278436 |
| Gm6304        | 0.385451377 | -1.230218023 | 3.617524663 | -0.340071772 | 0.733802479 NA |             |
| Atp1b1        | 2078.331427 | -1.230277001 | 0.269468653 | -4.565566305 | 4.98E-06       | 1.84E-05    |
| Necab3        | 4.933115883 | -1.231220995 | 1.18770237  | -1.036641019 | 0.299903189    | 0.389572506 |
| Gm7658        | 0.38593297  | -1.231722968 | 3.617446594 | -0.340495135 | 0.733483686 NA |             |
| Glp1r         | 0.385994424 | -1.231914772 | 3.617436664 | -0.340549092 | 0.733443059 NA |             |
| Cdc42bpg      | 635.1182403 | -1.233784788 | 0.331730439 | -3.719239    | 0.000199824    | 0.000574178 |
| Al413582      | 94.12670796 | -1.233787618 | 0.281578527 | -4.381682199 | 1.18E-05       | 4.11E-05    |
| Grk5          | 163.8506975 | -1.233836555 | 0.250585245 | -4.923819664 | 8.49E-07       | 3.46E-06    |
| Col28a1       | 2.811670361 | -1.23407592  | 1.199907801 | -1.028475621 | 0.303726153    | 0.393788384 |
| Gm8767        | 0.389014531 | -1.234105354 | 3.284454758 | -0.375741316 | 0.707109219 NA |             |
| Gm8168        | 0.389026191 | -1.234131528 | 3.284434895 | -0.375751558 | 0.707101604 NA |             |
| Mgam2-ps      | 5.461224021 | -1.234418821 | 0.961079521 | -1.28440862  | 0.198999018    | 0.276040298 |
| Gm15285       | 0.389162632 | -1.234438517 | 3.28420271  | -0.375871597 | 0.707012357 NA |             |
| Dpy1912       | 0.985949924 | -1.234475439 | 2.705243942 | -0.456326847 | 0.648154961 NA |             |
| Gm9001        | 0.389229271 | -1.23458893  | 3.284089465 | -0.375930359 | 0.70696867 NA  |             |
| Cntln         | 37.72710023 | -1.235584987 | 0.494960669 | -2.496329635 | 0.012548593    | 0.024851309 |
| Trbv12-1      | 0.36433875  | -1.235591034 | 3.61732369  | -0.341576021 | 0.732669985 NA |             |
| Gm4707        | 4.73772743  | -1.235807527 | 1.243039877 | -0.994181723 | 0.320134404    | 0.411494483 |
| Cdcp1         | 257.7336553 | -1.236121603 | 0.242021268 | -5.107491632 | 3.26E-07       | 1.41E-06    |
| Gm11975       | 0.364476318 | -1.236226206 | 3.617269983 | -0.341756687 | 0.732534008 NA |             |
| Tbc1d14       | 509.2911441 | -1.236842811 | 0.227873885 | -5.427751455 | 5.71E-08       | 2.69E-07    |
| Gm15549       | 0.364633352 | -1.236949066 | 3.617209029 | -0.341962285 | 0.732379275 NA |             |
| Usp18         | 306.1986772 | -1.23783614  | 0.303586453 | -4.077376079 | 4.55E-05       | 0.000145354 |
| Tspan15       | 65.49169183 | -1.2380832   | 0.333268142 | -3.714976148 | 0.000203223    | 0.00058306  |
| Cfap157       | 1.269526716 | -1.238504611 | 1.900167526 | -0.651787063 | 0.514538548 NA |             |
| Gm31166       | 16.84499338 | -1.238596242 | 0.664457362 | -1.864071817 | 0.06231162     | 0.102103854 |
| Aida          | 384.8497786 | -1.239041114 | 0.19122379  | -6.479534357 | 9.20E-11       | 6.04E-10    |
| H2-Oa         | 10.75528718 | -1.239182234 | 0.82840369  | -1.495867594 | 0.134688162    | 0.198784849 |
| Vmn1r71       | 0.90203966  | -1.239299765 | 2.808497797 | -0.441267843 | 0.659019103 NA |             |
| Gm12960       | 0.387921489 | -1.239533347 | 3.617008683 | -0.342695707 | 0.731827393 NA |             |
| Gm14415       | 0.387921489 | -1.239533347 | 3.617008683 | -0.342695707 | 0.731827393 NA |             |
| Gm29134       | 0.387921489 | -1.239533347 | 3.617008683 | -0.342695707 | 0.731827393 NA |             |
| Gm42430       | 0.387921489 | -1.239533347 | 3.617008683 | -0.342695707 | 0.731827393 NA |             |
| Pgm2          | 176.9171525 | -1.239706833 | 0.309555015 | -4.004802939 | 6.21E-05       | 0.000193695 |
| Il12b         | 1.621840844 | -1.239995746 | 1.726097564 | -0.71838103  | 0.47252238 NA  |             |
| Cass4         | 9.843500823 | -1.239998227 | 0.849394607 | -1.459861196 | 0.144328226    | 0.210768168 |
| Pcgf2         | 395.4229849 | -1.24081766  | 0.307344002 | -4.037227513 | 5.41E-05       | 0.000170375 |
| Gm6542        | 0.924915301 | -1.240987404 | 2.146133727 | -0.578243279 | 0.563099883 NA |             |
| Enoph1        | 154.049864  | -1.241656686 | 0.330925207 | -3.752076484 | 0.000175376    | 0.000509077 |
| Cd2ap         | 1978.505582 | -1.242939045 | 0.173963489 | -7.144827064 | 9.01E-13       | 7.40E-12    |
| Gm9257        | 0.366064459 | -1.243436559 | 3.61666967  | -0.343807058 | 0.730991392 NA |             |
| Lypd8         | 3.057005121 | -1.244295862 | 2.420556915 | -0.514053544 | 0.607214556    | 0.688467261 |
| Sidt1         | 8.121389725 | -1.244487009 | 0.904188205 | -1.376358375 | 0.168710708    | 0.240302461 |
| Igf2bp2       | 47.78816275 | -1.245162079 | 0.467213907 | -2.665079231 | 0.007697019    | 0.016059084 |
| Ogdhl         | 6.367473398 | -1.245627751 | 0.978702801 | -1.272733409 | 0.203112658    | 0.280992015 |
| Ly6d          | 88.59889506 | -1.246575268 | 1.308691129 | -0.952535889 | 0.340825274    | 0.433158586 |
| Slc35c1       | 557.5556732 | -1.246682144 | 0.235964063 | -5.283355979 | 1.27E-07       | 5.75E-07    |
| Bean1         | 11.24950434 | -1.247397455 | 0.704631989 | -1.770282181 | 0.076680145    | 0.122584688 |
| Gm3608        | 6.869953376 | -1.248567191 | 0.928081854 | -1.34532012  | 0.178521879    | 0.252295531 |
| Leprot        | 549.0751068 | -1.248622913 | 0.180542273 | -6.91595876  | 4.65E-12       | 3.54E-11    |
| D130040H23Rik | 31.81770053 | -1.249089562 | 0.442461848 | -2.823044668 | 0.004756994    | 0.010386429 |
| Gm44429       | 3.026961662 | -1.24988463  | 2.232817702 | -0.559779076 | 0.575630138    | 0.65923301  |
| Lamb1         | 280.0630204 | -1.250329579 | 0.1841308   | -6.790442327 | 1.12E-11       | 8.14E-11    |
| Rnf183        | 0.367757831 | -1.250690383 | 3.614462738 | -0.34602387  | 0.729324776 NA |             |
| Trav13d-2     | 0.384692261 | -1.251062322 | 3.615338868 | -0.346042893 | 0.729310479 NA |             |
| Trav13n-2     | 0.384692261 | -1.251062322 | 3.615338868 | -0.346042893 | 0.729310479 NA |             |
| Myo3b         | 1.238320193 | -1.251227729 | 2.131377794 | -0.587051124 | 0.557169372 NA |             |
| C1q1          | 0.978412355 | -1.251585747 | 2.005789121 | -0.623986706 | 0.532636316 NA |             |
| Ap1s3         | 88.28922277 | -1.252066886 | 0.294032812 | -4.258255658 | 2.06E-05       | 6.93E-05    |
| Sebox         | 20.25223754 | -1.252851572 | 0.530677722 | -2.360852021 | 0.018233005    | 0.034629708 |
| Cplx2         | 32.15545538 | -1.253407763 | 0.43022538  | -2.913374759 | 0.003575452    | 0.008019249 |
| Ppm1n         | 0.372164894 | -1.253448439 | 3.615079996 | -0.346727719 | 0.728795884 NA |             |



|          |             |              |             |              |             |             |
|----------|-------------|--------------|-------------|--------------|-------------|-------------|
| Tnip3    | 7.265822354 | -1.253627701 | 0.899340426 | -1.393941231 | 0.163335352 | 0.233778951 |
| Gm5526   | 3.18536632  | -1.253972416 | 1.656985768 | -0.756779232 | 0.449182137 | 0.540256214 |
| Cpm      | 73.87559717 | -1.255822505 | 0.352907765 | -3.558500627 | 0.000372978 | 0.001020139 |
| Btnl2    | 4.019013381 | -1.25714385  | 1.079430637 | -1.164636066 | 0.244166339 | 0.327811288 |
| Xaf1     | 250.1997763 | -1.257410452 | 0.280066418 | -4.489686636 | 7.13E-06    | 2.57E-05    |
| Gm2564   | 36.51115234 | -1.258195069 | 0.375467098 | -3.351012848 | 0.000805166 | 0.002066305 |
| Stox1    | 4.612749791 | -1.258247724 | 1.087320365 | -1.157200549 | 0.247190433 | 0.331167191 |
| lsg20    | 98.29932791 | -1.258298911 | 0.335207261 | -3.753793718 | 0.000174178 | 0.000506031 |
| Smim22   | 108.5633571 | -1.258348809 | 0.286648709 | -4.389863862 | 1.13E-05    | 3.97E-05    |
| Gm15795  | 1.589331238 | -1.259007906 | 1.768667364 | -0.711839847 | 0.476563955 | NA          |
| Gm11581  | 2.45958058  | -1.260240411 | 1.365740124 | -0.922752717 | 0.356136086 | 0.448537825 |
| Bbs1     | 55.25647784 | -1.262138364 | 0.305911313 | -4.125830952 | 3.69E-05    | 0.000119633 |
| Rapgef5  | 197.8348605 | -1.262672753 | 0.345392733 | -3.655759469 | 0.000256422 | 0.000722081 |
| Shisa8   | 0.395153263 | -1.262707569 | 3.615712277 | -0.34922789  | 0.72691823  | NA          |
| Lhx3     | 0.395160711 | -1.262731826 | 3.615710887 | -0.349234733 | 0.726913093 | NA          |
| Gm5435   | 0.395185923 | -1.262813925 | 3.615706183 | -0.349257894 | 0.726895706 | NA          |
| Gm12584  | 0.395188546 | -1.262822466 | 3.615705694 | -0.349260303 | 0.726893898 | NA          |
| Gm6983   | 0.395247409 | -1.263014074 | 3.615694723 | -0.349314356 | 0.726853322 | NA          |
| Gm20662  | 0.395388974 | -1.263474494 | 3.615668392 | -0.34944424  | 0.726755825 | NA          |
| Asx1     | 1021.678515 | -1.263793983 | 0.220315181 | -5.73630004  | 9.68E-09    | 5.02E-08    |
| Adgrf4   | 3.80779114  | -1.264441387 | 1.11702431  | -1.131973025 | 0.257645775 | 0.342589906 |
| Spata24  | 106.8033267 | -1.265404357 | 0.358707065 | -3.527681718 | 0.000419216 | 0.001135854 |
| Chst2    | 59.50761269 | -1.266420718 | 0.327660053 | -3.865044602 | 0.000111069 | 0.000333187 |
| Olfm4    | 2.071254373 | -1.266450914 | 1.545104847 | -0.819653706 | 0.412413548 | 0.504580606 |
| Methig1  | 4.62914153  | -1.26706715  | 2.110066581 | -0.600486604 | 0.548181986 | 0.633921832 |
| Cbr1     | 2966.513865 | -1.267100911 | 0.177862295 | -7.124055774 | 1.05E-12    | 8.54E-12    |
| Mill2    | 53.53730059 | -1.267820406 | 0.522583699 | -2.426061909 | 0.015263666 | 0.029559807 |
| Desi2    | 575.8649672 | -1.268569983 | 0.262050065 | -4.840945122 | 1.29E-06    | 5.14E-06    |
| Ddb1     | 5127.335983 | -1.269134919 | 0.224740328 | -5.647116959 | 1.63E-08    | 8.23E-08    |
| Gm12269  | 0.397399583 | -1.269439619 | 3.615351587 | -0.351124804 | 0.72549472  | NA          |
| Mpp7     | 181.1203457 | -1.270045647 | 0.322894945 | -3.933309164 | 8.38E-05    | 0.000256991 |
| Prrg3    | 46.40008158 | -1.270291715 | 0.473495488 | -2.682795819 | 0.007300955 | 0.015307672 |
| S1pr4    | 6.285733677 | -1.270722601 | 0.899849297 | -1.412150463 | 0.157905663 | 0.227403559 |
| Olftr739 | 0.385401789 | -1.270740258 | 3.615276982 | -0.351491812 | 0.725219414 | NA          |
| Fam72a   | 68.27979334 | -1.270877934 | 0.334792741 | -3.796014009 | 0.000147041 | 0.000432647 |
| Gas8     | 152.085761  | -1.271188857 | 0.22929642  | -5.543867013 | 2.96E-08    | 1.45E-07    |
| Fam216a  | 103.4244694 | -1.271515411 | 0.396838022 | -3.204116894 | 0.001354775 | 0.003329902 |
| Akap6    | 7.288429499 | -1.272084901 | 0.781360621 | -1.628038151 | 0.103516796 | 0.158958237 |
| Gm11978  | 0.398326856 | -1.272286295 | 3.615204307 | -0.351926527 | 0.724893365 | NA          |
| Pdlim3   | 15.60869981 | -1.272690904 | 0.599047733 | -2.124523361 | 0.033626405 | 0.059497971 |
| Hat1     | 298.3368489 | -1.272906903 | 0.232160036 | -5.48288554  | 4.18E-08    | 2.01E-07    |
| Plxnd1   | 671.3392997 | -1.27367728  | 0.264563157 | -4.814265507 | 1.48E-06    | 5.82E-06    |
| Radil    | 1.258902474 | -1.273852394 | 1.935549305 | -0.65813482  | 0.510451503 | NA          |
| MLlt3    | 135.7339099 | -1.27393621  | 0.420255052 | -3.031340617 | 0.002434704 | 0.005657966 |
| Fbxo24   | 1.810649618 | -1.273966696 | 2.103767937 | -0.605564271 | 0.544804134 | 0.631137597 |
| Gm12936  | 0.398957518 | -1.274215007 | 3.615105145 | -0.352469695 | 0.724486042 | NA          |
| Tpm3     | 2285.000295 | -1.274372658 | 0.200127549 | -6.367802259 | 1.92E-10    | 1.21E-09    |
| Gm16519  | 0.379348561 | -1.274656939 | 3.196760444 | -0.398733956 | 0.690089245 | NA          |
| Gstm5    | 396.6604137 | -1.275016952 | 0.280364012 | -4.547719746 | 5.42E-06    | 1.99E-05    |
| Gm13597  | 34.5381794  | -1.275162734 | 0.525246341 | -2.427742249 | 0.015193137 | 0.029436594 |
| Prdm14   | 0.3795314   | -1.276000292 | 3.196441794 | -0.399193971 | 0.689750285 | NA          |
| Slc24a1  | 0.379548972 | -1.276122358 | 3.196411161 | -0.399235985 | 0.689719331 | NA          |
| Rhog     | 571.4345634 | -1.27618351  | 0.178408853 | -7.15314004  | 8.48E-13    | 7.00E-12    |
| Cacna1g  | 10.54334604 | -1.276372995 | 0.939296977 | -1.358859899 | 0.174190988 | 0.246973384 |
| Wwc2     | 498.094624  | -1.276759331 | 0.265246835 | -4.813476221 | 1.48E-06    | 5.84E-06    |
| Gm20696  | 4.096326285 | -1.276838713 | 1.390863127 | -0.918018954 | 0.358608943 | 0.450984383 |
| Wt1      | 15.67336024 | -1.277222287 | 0.817571154 | -1.562215448 | 0.118237243 | 0.178192054 |
| Slc1a4   | 150.2264205 | -1.27748679  | 0.412357635 | -3.098006878 | 0.001948269 | 0.004614991 |
| Gm4761   | 0.919906841 | -1.277826886 | 1.851469485 | -0.690169023 | 0.490087901 | NA          |
| Fap      | 18.20806731 | -1.278231082 | 0.578825066 | -2.208320194 | 0.027221961 | 0.049417526 |
| Pde5a    | 45.34557629 | -1.278267834 | 0.434936567 | -2.938975316 | 0.003292993 | 0.007455371 |
| Fn1      | 42123.22299 | -1.278273004 | 0.292569539 | -4.369125392 | 1.25E-05    | 4.33E-05    |
| Alcam    | 1969.602607 | -1.278500454 | 0.256281924 | -4.988648577 | 6.08E-07    | 2.52E-06    |
| Gm15483  | 0.3825316   | -1.278766255 | 3.614749941 | -0.353763407 | 0.723516199 | NA          |
| Prim1    | 162.0888749 | -1.278901245 | 0.370811013 | -3.448930051 | 0.000562812 | 0.001490806 |
| Ephb2    | 19.36380286 | -1.279414133 | 0.476148695 | -2.687005439 | 0.007209578 | 0.015142156 |

|             |             |              |             |              |                |             |
|-------------|-------------|--------------|-------------|--------------|----------------|-------------|
| Nenf        | 335.0969368 | -1.280148693 | 0.184213148 | -6.94927972  | 3.67E-12       | 2.82E-11    |
| Alms1-ps1   | 0.383242696 | -1.280561077 | 3.614715686 | -0.354263292 | 0.723141575 NA |             |
| Fibcd1      | 0.383315139 | -1.280744121 | 3.614712149 | -0.354314277 | 0.72310337 NA  |             |
| Gm18517     | 17.5317416  | -1.280904767 | 0.518371181 | -2.471018477 | 0.013472886    | 0.02644017  |
| Ppil6       | 20.6573735  | -1.281591189 | 0.571951402 | -2.240734415 | 0.025043283    | 0.045882633 |
| Svil        | 1278.620963 | -1.281937929 | 0.223259774 | -5.741911796 | 9.36E-09       | 4.88E-08    |
| Ldb1        | 1673.402494 | -1.282085398 | 0.291210587 | -4.402605721 | 1.07E-05       | 3.75E-05    |
| Gm14142     | 0.40135249  | -1.282419589 | 3.614621054 | -0.354786731 | 0.722749369 NA |             |
| Areg        | 1.637537929 | -1.282499649 | 1.489929364 | -0.860778826 | 0.389359869    | 0.481825378 |
| Gm30970     | 0.389093846 | -1.282520265 | 3.614739261 | -0.354802981 | 0.722737195 NA |             |
| Uggt2       | 112.9702306 | -1.282633227 | 0.474822559 | -2.70128957  | 0.006907117    | 0.014551722 |
| Gm16335     | 0.401478495 | -1.282811099 | 3.614600094 | -0.354897102 | 0.722666679 NA |             |
| Cracr2b     | 131.841051  | -1.283239882 | 0.35349432  | -3.630157011 | 0.000283249    | 0.000790574 |
| Cpz         | 24.99555693 | -1.283278529 | 0.546582242 | -2.34782331  | 0.018883477    | 0.035713946 |
| Mindy4      | 110.2356739 | -1.283284581 | 0.400872908 | -3.201225513 | 0.001368444    | 0.003360108 |
| Abl2        | 331.9744194 | -1.283505178 | 0.227754119 | -5.635486117 | 1.75E-08       | 8.78E-08    |
| Ap3m2       | 72.8148617  | -1.283550441 | 0.281362102 | -4.561916584 | 5.07E-06       | 1.87E-05    |
| Gm43472     | 0.380894835 | -1.284463593 | 3.194081619 | -0.402138626 | 0.687582007 NA |             |
| Gm19587     | 0.402165339 | -1.284939944 | 3.614486563 | -0.355497225 | 0.722217123 NA |             |
| Rps8-ps4    | 0.941119737 | -1.28503294  | 1.921684134 | -0.668701436 | 0.503685951 NA |             |
| Hoxc10      | 0.402303714 | -1.285367772 | 3.614463836 | -0.355617826 | 0.722126792 NA |             |
| Lypd6b      | 0.402310194 | -1.285387799 | 3.614462773 | -0.355623471 | 0.722122564 NA |             |
| Olfr650-ps1 | 0.402310681 | -1.285389303 | 3.614462693 | -0.355623896 | 0.722122246 NA |             |
| Alox12b     | 0.402312114 | -1.285393731 | 3.614462458 | -0.355625144 | 0.722121311 NA |             |
| Tmem176b    | 8570.718901 | -1.28543241  | 0.193991141 | -6.626242847 | 3.44E-11       | 2.37E-10    |
| C1cn1       | 3.125863727 | -1.285546707 | 1.419050859 | -0.905920107 | 0.364978141    | 0.457275472 |
| Selenoh     | 236.3988768 | -1.285953335 | 0.278061852 | -4.624702483 | 3.75E-06       | 1.41E-05    |
| Ephb3       | 12.05861664 | -1.286362381 | 0.652573433 | -1.971214758 | 0.048699317    | 0.082560257 |
| Prcp        | 271.5193338 | -1.287313264 | 0.219787324 | -5.85708603  | 4.71E-09       | 2.53E-08    |
| Cd38        | 289.5294301 | -1.287772286 | 0.242451358 | -5.311466575 | 1.09E-07       | 4.98E-07    |
| Fgfr2       | 1700.199948 | -1.288145169 | 0.297410008 | -4.331209898 | 1.48E-05       | 5.09E-05    |
| Rnasel      | 87.14867587 | -1.288873251 | 0.274593184 | -4.693755437 | 2.68E-06       | 1.02E-05    |
| Mllt11      | 67.42923866 | -1.289662015 | 0.328906727 | -3.921056977 | 8.82E-05       | 0.000269206 |
| Wdr95       | 0.908799873 | -1.290199355 | 1.851624763 | -0.696793098 | 0.485932286 NA |             |
| Olfr536     | 3.478160464 | -1.290268007 | 1.297955429 | -0.994077284 | 0.320185244    | 0.411497779 |
| Ankrd44     | 153.5256583 | -1.291789207 | 0.316936855 | -4.075856708 | 4.58E-05       | 0.000146252 |
| Lad1        | 368.2203819 | -1.292172899 | 0.211074469 | -6.121881568 | 9.25E-10       | 5.42E-09    |
| Ccnd3       | 1449.776942 | -1.293347316 | 0.158964386 | -8.136082222 | 4.08E-16       | 4.64E-15    |
| Pi15        | 23.65908493 | -1.293405853 | 0.489406447 | -2.642805095 | 0.008222235    | 0.017031915 |
| Gm6569      | 0.365681939 | -1.293645567 | 3.614012642 | -0.357952696 | 0.720378714 NA |             |
| Snorc       | 0.365681939 | -1.293645567 | 3.614012642 | -0.357952696 | 0.720378714 NA |             |
| Ssbp2       | 68.36591043 | -1.293859048 | 0.458452138 | -2.822233646 | 0.004769042    | 0.010407402 |
| Rgmb        | 36.08320517 | -1.29401062  | 0.360486836 | -3.589619625 | 0.000331161    | 0.000912646 |
| Fam24b      | 0.911100345 | -1.29410138  | 2.045264913 | -0.632730446 | 0.526909684 NA |             |
| Hmgxb4      | 181.2204446 | -1.294280257 | 0.279932188 | -4.623549251 | 3.77E-06       | 1.41E-05    |
| Acer1       | 2.644468375 | -1.294338313 | 1.260076028 | -1.027190649 | 0.3043307      | 0.394452199 |
| Naalad2     | 29.12672307 | -1.294412659 | 0.407284268 | -3.17815531  | 0.001482153    | 0.003607102 |
| Catip       | 3.529165674 | -1.294708614 | 1.268421489 | -1.020724283 | 0.307385086    | 0.397836392 |
| Slc5a4b     | 0.921906064 | -1.294711715 | 2.259058334 | -0.57312009  | 0.566563386 NA |             |
| Notch2      | 1125.443549 | -1.294818816 | 0.168124153 | -7.701563373 | 1.34E-14       | 1.32E-13    |
| Gm14813     | 0.386501348 | -1.295096683 | 3.183627272 | -0.406799092 | 0.684155554 NA |             |
| Rpl12       | 524.0581482 | -1.295679874 | 0.271979662 | -4.763885145 | 1.90E-06       | 7.36E-06    |
| Ighm        | 275.5282703 | -1.2957679   | 0.397473521 | -3.260010619 | 0.00111408     | 0.002785283 |
| Ninj2       | 0.386657677 | -1.296177229 | 3.183360594 | -0.407172606 | 0.68388122 NA  |             |
| Marco       | 69.79979555 | -1.296355206 | 0.789155429 | -1.642712144 | 0.100442505    | 0.154949219 |
| Baalc       | 0.92530434  | -1.296403898 | 2.035084056 | -0.6370272   | 0.524107126 NA |             |
| Gm10702     | 0.386703642 | -1.296486898 | 3.183282371 | -0.407279891 | 0.68380243 NA  |             |
| Gpr18       | 7.462709061 | -1.296641147 | 0.796141154 | -1.628657355 | 0.103385575    | 0.158799647 |
| Speg        | 37.720771   | -1.296823057 | 0.464356313 | -2.792732697 | 0.005226486    | 0.011318766 |
| Gabrb3      | 41.79131136 | -1.296974207 | 0.766502859 | -1.692067017 | 0.090633196    | 0.14210565  |
| Olfr1047    | 0.938386137 | -1.297370747 | 2.077874071 | -0.624374097 | 0.532381932 NA |             |
| Cdh1        | 2238.174471 | -1.297629086 | 0.178203046 | -7.281744692 | 3.30E-13       | 2.82E-12    |
| Aak1        | 673.2102496 | -1.298266378 | 0.299492424 | -4.334888884 | 1.46E-05       | 5.02E-05    |
| Zbp1        | 280.2610502 | -1.298819609 | 0.333221908 | -3.897761759 | 9.71E-05       | 0.000294244 |
| Bmpr1b      | 3.363892594 | -1.299010856 | 1.562450657 | -0.831393203 | 0.405751538    | 0.498325208 |
| Hes7        | 17.79116349 | -1.299358717 | 0.554969089 | -2.341317279 | 0.019215829    | 0.036266075 |

|               |             |              |              |              |                |             |             |
|---------------|-------------|--------------|--------------|--------------|----------------|-------------|-------------|
| Syt7          | 70.8878474  | -1.299460066 | 0.454115627  | -2.861518052 | 0.004216175    | 0.009327308 |             |
| Mapkapk3      | 205.7260238 | -1.300382043 | 0.227608277  | -5.713245853 | 1.11E-08       | 5.71E-08    |             |
| Chtf8         | 556.8282459 | -1.300833569 | 0.233887478  | -5.561792276 | 2.67E-08       | 1.31E-07    |             |
| Pbx4          | 19.40603342 | -1.301026537 | 0.709649216  | -1.83337525  | 0.066752392    | 0.108535506 |             |
| Hspa12b       | 42.95875449 | -1.301613561 | 0.410962672  | -3.167230628 | 0.001538982    | 0.003728904 |             |
| Rtn4r1        | 406.6148191 | -1.301924729 | 0.176137307  | -7.391533047 | 1.45E-13       | 1.29E-12    |             |
| Lrrc66        | 0.395323859 | -1.301968557 | 3.206346793  | -0.406059806 | 0.684698658 NA |             |             |
| Chst7         | 19.84339104 | -1.302316102 | 0.480516702  | -2.710241072 | 0.006723432    | 0.014201595 |             |
| Flvcr1        | 146.9282216 | -1.302365074 | 0.250544136  | -5.198146296 | 2.01E-07       | 8.95E-07    |             |
| Igkj3         | 0.74037545  | -1.302621401 | 3.384893547  | -0.384833787 | 0.700360565 NA |             |             |
| Vars          | 1374.706617 | -1.302713824 | 0.251131571  | -5.18737576  | 2.13E-07       | 9.44E-07    |             |
| Bdnf          | 63.49916546 | -1.302912335 | 0.295832842  | -4.404218022 | 1.06E-05       | 3.73E-05    |             |
| Ccr10         | 1.694789605 | -1.304473728 | 1.552569619  | -0.840203049 | 0.400794549    | 0.49383821  |             |
| Apc2          | 11.84258773 | -1.304764099 | 0.88242193   | -1.478617036 | 0.139242697    | 0.204198666 |             |
| Dpf1          | 6.791061683 | -1.305792858 | 0.917651023  | -1.422973251 | 0.15474391     | 0.223717281 |             |
| D130052B06Rik | 0.389572695 | -1.306108736 | 3.178416558  | -0.410930636 | 0.681123398 NA |             |             |
| Enthd1        | 0.389574123 | -1.306110954 | 3.178414053  | -0.410931657 | 0.681122649 NA |             |             |
| Npm3-ps1      | 0.389659255 | -1.306251591 | 3.178264794  | -0.410995205 | 0.681076051 NA |             |             |
| Cbl           | 456.8535578 | -1.30678894  | 0.231926834  | -5.634487895 | 1.76E-08       | 8.83E-08    |             |
| Gm14892       | 0.389825191 | -1.306973709 | 3.177979766  | -0.411259292 | 0.680882416 NA |             |             |
| Ivns1abp      | 4068.459084 | -1.307010137 | 0.250452158  | -5.218602012 | 1.80E-07       | 8.07E-07    |             |
| Cox6c2        | 0.409549659 | -1.308057772 | 3.613232665  | -0.362018695 | 0.71733806 NA  |             |             |
| Gm15975       | 0.409549659 | -1.308057772 | 3.613232665  | -0.362018695 | 0.71733806 NA  |             |             |
| Gm20657       | 0.409549659 | -1.308057772 | 3.613232665  | -0.362018695 | 0.71733806 NA  |             |             |
| Tas2r135      | 0.409549659 | -1.308057772 | 3.613232665  | -0.362018695 | 0.71733806 NA  |             |             |
| Pcdhb16       | 6.220339375 | -1.30860798  | 0.908931742  | -1.439720849 | 0.149946392    | 0.217815789 |             |
| Pcdhga11      | 4.982992878 | -1.309116544 | 0.950344843  | -1.377517387 | 0.168352343    | 0.239812061 |             |
| Casq1         | 12.11617575 | -1.309509567 | 0.783239076  | -1.67191552  | 0.094540982    | 0.147203823 |             |
| Fkbp1a        | 1912.161645 | -1.309552006 | 0.15172167   | -8.631278641 | 6.07E-18       | 8.16E-17    |             |
| Mdc1          | 364.5142231 | -1.310349276 | 0.205565827  | -6.374353617 | 1.84E-10       | 1.17E-09    |             |
| Fxyd7         | 15.71325076 | -1.310381353 | 0.783416562  | -1.672649542 | 0.094396308    | 0.147005413 |             |
| Tmsb15l       | 18.36526215 | -1.310570035 | 0.553592527  | -2.367391126 | 0.01791399     | 0.034088369 |             |
| Gm47991       | 1.681467919 | -1.311208981 | 2.0109794    | -0.652025068 | 0.514385001    | 0.603145081 |             |
| Cyp2a4        | 29.44410831 | -1.311683853 | 1.029225409  | -1.274437885 | 0.202508273    | 0.280337884 |             |
| Mrtfa         | 313.8111888 | -1.312138033 | 0.206878857  | -6.342542928 | 2.26E-10       | 1.42E-09    |             |
| Iids          | 378.1438502 | -1.312158191 | 0.222781874  | -5.889878583 | 3.86E-09       | 2.10E-08    |             |
| Fgf11         | 31.43772168 | -1.312565178 | 0.492038631  | -2.667605944 | 0.00763938     | 0.015952493 |             |
| Add1          | 1408.541174 | -1.314105229 | 0.176199286  | -7.458062176 | 8.78E-14       | 7.99E-13    |             |
| Colgalt1      | 1942.763193 | -1.314119824 | 0.166671428  | -7.884493708 | 3.16E-15       | 3.29E-14    |             |
| B3gnt3        | 53.92733186 | -1.315118103 | 0.372173212  | -3.53361838  | 0.000409912    | 0.001112237 |             |
|               | 5-Sep       | 41.70167957  | -1.315243055 | 0.412919148  | -3.185231447   | 0.001446383 | 0.003529621 |
| Stac          | 0.887701436 | -1.315992264 | 2.070974056  | -0.635446041 | 0.525137548 NA |             |             |
| Fem1c         | 513.9006773 | -1.316798592 | 0.198234288  | -6.642637881 | 3.08E-11       | 2.13E-10    |             |
| Sult1a1       | 10374.0171  | -1.317138869 | 0.200342253  | -6.574443716 | 4.88E-11       | 3.31E-10    |             |
| Zfp28         | 92.42284132 | -1.317435553 | 0.311465913  | -4.229790478 | 2.34E-05       | 7.81E-05    |             |
| Mr1           | 168.3408567 | -1.318435907 | 0.240864735  | -5.473760653 | 4.41E-08       | 2.11E-07    |             |
| Gm7278        | 0.946019095 | -1.31909941  | 2.403057665  | -0.548925408 | 0.583056641 NA |             |             |
| Arhgef4       | 8.708957151 | -1.319285528 | 0.774512554  | -1.703375267 | 0.088497863    | 0.139180034 |             |
| Gm715         | 0.893480269 | -1.319611684 | 2.069931614  | -0.637514629 | 0.523789684 NA |             |             |
| Syt9          | 21.30102628 | -1.319895213 | 0.572200287  | -2.306701418 | 0.021071471    | 0.039375912 |             |
| Cxcr2         | 19.51166602 | -1.319927147 | 0.525607926  | -2.511239049 | 0.01203082     | 0.023932487 |             |
| Gm8738        | 0.904566676 | -1.320398769 | 2.681854423  | -0.49234543  | 0.62247517 NA  |             |             |
| Jup           | 1339.140507 | -1.320401961 | 0.16473416   | -8.015350073 | 1.10E-15       | 1.20E-14    |             |
| Trim68        | 100.6385563 | -1.320723383 | 0.333105741  | -3.964877282 | 7.34E-05       | 0.000226916 |             |
| Gm15711       | 0.396612235 | -1.320784777 | 3.612622435  | -0.365602772 | 0.714661506 NA |             |             |
| Klf16         | 167.257975  | -1.321844608 | 0.270299673  | -4.890293039 | 1.01E-06       | 4.06E-06    |             |
| Gm14537       | 0.402722055 | -1.323543176 | 3.194120185  | -0.414368621 | 0.678604166 NA |             |             |
| Myl12b        | 2966.766054 | -1.324811204 | 0.155597825  | -8.51432986  | 1.68E-17       | 2.18E-16    |             |
| Tslp          | 6.165606837 | -1.32488445  | 0.809552389  | -1.63656419  | 0.101721563    | 0.156568184 |             |
| Lvrn          | 0.396788497 | -1.326495556 | 3.165805927  | -0.419007225 | 0.675210852 NA |             |             |
| Slc7a5        | 62.07542636 | -1.326683358 | 0.355717075  | -3.729603312 | 0.000191781    | 0.000552652 |             |
| Olfr117       | 3.751333019 | -1.326714856 | 1.116501287  | -1.188278841 | 0.234723571    | 0.31756416  |             |
| Akr1b8        | 66.56275349 | -1.327649839 | 0.293127561  | -4.52925626  | 5.92E-06       | 2.16E-05    |             |
| Ccdc42        | 0.404003007 | -1.327877268 | 3.192013816  | -0.41599985  | 0.677410113 NA |             |             |
| Tsc22d4       | 431.838476  | -1.327997167 | 0.255681134  | -5.193958373 | 2.06E-07       | 9.14E-07    |             |
| Cenpp         | 26.45295096 | -1.328111552 | 0.544115876  | -2.440861608 | 0.014652269    | 0.028495537 |             |

|            |             |              |             |              |                 |             |
|------------|-------------|--------------|-------------|--------------|-----------------|-------------|
| Ccdc149    | 111.8187433 | -1.328309781 | 0.309141552 | -4.296768816 | 1.73E-05        | 5.89E-05    |
| Btc        | 78.51629202 | -1.329819842 | 0.310723227 | -4.2797568   | 1.87E-05        | 6.33E-05    |
| Abli1      | 1250.232183 | -1.32998236  | 0.216861175 | -6.132874469 | 8.63E-10        | 5.06E-09    |
| Ikzf2      | 25.28015729 | -1.330256715 | 0.804097965 | -1.654346575 | 0.098057115     | 0.151805094 |
| Kcng3      | 0.404863926 | -1.330349475 | 3.190604677 | -0.416958417 | 0.676708824 NA  |             |
| Ckap5      | 433.7695341 | -1.331482538 | 0.207612102 | -6.413318501 | 1.42E-10        | 9.15E-10    |
| Gm36298    | 4.928838342 | -1.331960578 | 1.043265974 | -1.276721959 | 0.201700426     | 0.279350584 |
| Fam229b    | 23.90052338 | -1.332257442 | 0.446923538 | -2.980951616 | 0.002873542     | 0.006580006 |
| Klh23      | 30.61552732 | -1.333046239 | 0.486313031 | -2.741127943 | 0.006122866     | 0.013049459 |
| Rtl8b      | 210.4203013 | -1.335033037 | 0.226288468 | -5.899695419 | 3.64E-09        | 1.99E-08    |
| Mkl        | 152.6278275 | -1.33531844  | 0.310131412 | -4.305653632 | 1.66E-05        | 5.68E-05    |
| Cacna1d    | 61.59002892 | -1.335658243 | 0.460630799 | -2.899628608 | 0.00373605      | 0.008349789 |
| Gm16181    | 0.974392949 | -1.335695429 | 2.045585949 | -0.652964707 | 0.513779032 NA  |             |
| Nfatc1     | 370.9004212 | -1.336619011 | 0.160369871 | -8.334601772 | 7.78E-17        | 9.43E-16    |
| Ift43      | 122.580735  | -1.336625134 | 0.264480606 | -5.053773719 | 4.33E-07        | 1.83E-06    |
| Zfp46      | 155.0248431 | -1.336918155 | 0.276209445 | -4.840233307 | 1.30E-06        | 5.15E-06    |
| Kif26b     | 46.077897   | -1.337349309 | 0.372719088 | -3.588089137 | 0.00033311      | 0.000917278 |
| Rarb       | 86.34592688 | -1.33765593  | 0.272087683 | -4.91626785  | 8.82E-07        | 3.59E-06    |
| Ttc21b     | 116.5567391 | -1.338324661 | 0.294086901 | -4.550779569 | 5.34E-06        | 1.96E-05    |
| Gm43213    | 0.959112975 | -1.339269912 | 2.348973012 | -0.570151256 | 0.568575114 NA  |             |
| Cd300ld    | 74.29162544 | -1.340068767 | 0.445062001 | -3.010970973 | 0.002604137     | 0.006010741 |
| Lrrc6      | 0.916679392 | -1.340194543 | 2.015496796 | -0.664945013 | 0.506085664 NA  |             |
| Olfr1448   | 0.408651963 | -1.340215014 | 3.184306778 | -0.420881249 | 0.673841798 NA  |             |
| Olfr1199   | 0.408753334 | -1.340510721 | 3.184154363 | -0.420994264 | 0.673759271 NA  |             |
| Pkd112     | 1.589484151 | -1.34101278  | 1.900800171 | -0.705499084 | 0.480499702 NA  |             |
| Gm21854    | 0.386949854 | -1.341115196 | 3.611494653 | -0.371346305 | 0.710379613 NA  |             |
| Hic1       | 68.15269359 | -1.341205525 | 0.453004909 | -2.960686513 | 0.003069542     | 0.006988455 |
| Gm4873     | 0.409107041 | -1.341541925 | 3.183623095 | -0.421388426 | 0.673471469 NA  |             |
| Trim56     | 529.1749433 | -1.341599975 | 0.217496929 | -6.168362847 | 6.90E-10        | 4.09E-09    |
| Olfr689    | 0.925768734 | -1.341609909 | 2.27474543  | -0.589784638 | 0.555335043 NA  |             |
| Olfr829    | 0.387149818 | -1.341852605 | 3.611445257 | -0.371555571 | 0.710223774 NA  |             |
| Psg17      | 0.931859186 | -1.342752608 | 2.010362854 | -0.667915548 | 0.504187502 NA  |             |
| Ro60       | 136.383885  | -1.342923259 | 0.229515969 | -5.851110335 | 4.88E-09        | 2.62E-08    |
| Stfa2      | 0.402903916 | -1.342972499 | 3.15551727  | -0.42559504  | 0.670402955 NA  |             |
| Vmn1r200   | 0.40918275  | -1.343065993 | 3.182958675 | -0.421955209 | 0.673057711 NA  |             |
| Csta2      | 0.40841432  | -1.34321379  | 3.145033871 | -0.427090405 | 0.669313481 NA  |             |
| Gm12948    | 0.409732734 | -1.343363949 | 3.182685337 | -0.422085065 | 0.672962928 NA  |             |
| Lrrk2      | 36.62765574 | -1.343484011 | 0.503666351 | -2.66740871  | 0.007643865     | 0.015958134 |
| Olfr295    | 0.402951562 | -1.343994383 | 3.155442275 | -0.425929003 | 0.67015958 NA   |             |
| Gm12611    | 0.411408711 | -1.344134822 | 2.70017574  | -0.497795311 | 0.618628321 NA  |             |
| Gm10224    | 0.411551967 | -1.344493046 | 2.70006492  | -0.497948415 | 0.618520402 NA  |             |
| Gm11893    | 0.411651431 | -1.344733956 | 2.699986159 | -0.498052167 | 0.6184447274 NA |             |
| Rpl39l     | 1.247820323 | -1.345450898 | 1.814817934 | -0.741369629 | 0.458469354 NA  |             |
| Ehbp111    | 304.8602642 | -1.346150519 | 0.27028357  | -4.980511828 | 6.34E-07        | 2.62E-06    |
| Snx6       | 581.7984075 | -1.346289541 | 0.172270799 | -7.814960799 | 5.50E-15        | 5.61E-14    |
| Cep126     | 9.059499521 | -1.346299327 | 0.988442658 | -1.3620409   | 0.173184978     | 0.245730961 |
| Krt19      | 137.7667691 | -1.346770822 | 0.494740623 | -2.722175541 | 0.006485368     | 0.013748142 |
| Olfr1393   | 16.20592827 | -1.346964749 | 0.512442773 | -2.628517404 | 0.008575797     | 0.017701923 |
| Metrn1     | 70.94964806 | -1.347124237 | 0.273879306 | -4.918678431 | 8.71E-07        | 3.55E-06    |
| Pola1      | 116.5380726 | -1.347125832 | 0.365192468 | -3.688810561 | 0.000225305     | 0.000641021 |
| Fmod       | 66.63525206 | -1.347402352 | 0.439774583 | -3.063847717 | 0.002185101     | 0.005130368 |
| Cenpn      | 35.42640562 | -1.348029211 | 0.461850079 | -2.918759299 | 0.003514275     | 0.007894997 |
| Il11       | 4.677036033 | -1.348108822 | 0.931993949 | -1.446478085 | 0.148043154     | 0.215426469 |
| Myk3       | 18.06843307 | -1.349375093 | 0.712505025 | -1.893846421 | 0.058245398     | 0.09631111  |
| Pcdhga9    | 3.264460941 | -1.350188524 | 1.520863558 | -0.88777755  | 0.374660421     | 0.466764898 |
| Ywhah      | 1581.906186 | -1.35099188  | 0.200658144 | -6.732803615 | 1.66E-11        | 1.19E-10    |
| Atpif1     | 720.4975643 | -1.351705995 | 0.185357471 | -7.292427902 | 3.04E-13        | 2.62E-12    |
| Sp140      | 105.0933675 | -1.352308946 | 0.276257302 | -4.895106611 | 9.83E-07        | 3.97E-06    |
| Pglyrp4    | 0.394209271 | -1.352598446 | 3.608998788 | -0.374784954 | 0.707820405 NA  |             |
| Zscan2     | 146.7034436 | -1.353260106 | 0.299169494 | -4.523389362 | 6.09E-06        | 2.22E-05    |
| AC168977.1 | 4.667690653 | -1.353652311 | 1.052463501 | -1.286175064 | 0.198381972     | 0.275320095 |
| Hnrnpa1    | 3210.257811 | -1.354117787 | 0.148378574 | -9.126100531 | 7.10E-20        | 1.12E-18    |
| Wdr76      | 78.58157947 | -1.354122791 | 0.315679896 | -4.289543953 | 1.79E-05        | 6.07E-05    |
| Ccdc194    | 0.947321697 | -1.35463631  | 2.663075279 | -0.508673683 | 0.610980972 NA  |             |
| Olfr56     | 18.69848406 | -1.35520208  | 0.552538348 | -2.45268421  | 0.014179476     | 0.027680259 |
| Frat2      | 60.47101973 | -1.355217542 | 0.343175063 | -3.949056003 | 7.85E-05        | 0.000241572 |

|               |             |              |             |              |             |    |             |
|---------------|-------------|--------------|-------------|--------------|-------------|----|-------------|
| Lhx9          | 1.030387209 | -1.355386491 | 2.277899379 | -0.595015962 | 0.551832801 | NA |             |
| Zfp428        | 57.85944097 | -1.355720903 | 0.317900752 | -4.264604269 | 2.00E-05    |    | 6.75E-05    |
| Adamts6       | 143.2542992 | -1.356536985 | 0.34470689  | -3.935334701 | 8.31E-05    |    | 0.000254971 |
| Aoc3          | 10.14258412 | -1.356963373 | 0.723386729 | -1.875847758 | 0.060676188 |    | 0.099836662 |
| Wnk4          | 165.0946038 | -1.357347154 | 0.360154148 | -3.768795003 | 0.000164038 |    | 0.000478609 |
| Nfya          | 433.6232108 | -1.357375913 | 0.192232902 | -7.061100865 | 1.65E-12    |    | 1.32E-11    |
| Naaa          | 146.2718489 | -1.357666727 | 0.271499209 | -5.000628668 | 5.71E-07    |    | 2.38E-06    |
| Sstr3         | 0.989304101 | -1.357898067 | 2.690923602 | -0.504621561 | 0.613824664 | NA |             |
| Rhno1         | 271.4190927 | -1.358049093 | 0.235400188 | -5.769107932 | 7.97E-09    |    | 4.17E-08    |
| C920009B18Rik | 16.74151157 | -1.358303508 | 0.77386661  | -1.755216584 | 0.079222268 |    | 0.12616359  |
| Bicd1         | 101.1223991 | -1.358558648 | 0.360898178 | -3.764382121 | 0.000166961 |    | 0.00048664  |
| Gm13785       | 0.41363979  | -1.358901794 | 3.610498623 | -0.376375104 | 0.706638052 | NA |             |
| Mnt           | 331.5089102 | -1.35952947  | 0.236837905 | -5.740337335 | 9.45E-09    |    | 4.92E-08    |
| Fnbp1         | 758.7928295 | -1.360030949 | 0.181569046 | -7.490433973 | 6.86E-14    |    | 6.30E-13    |
| Nrl           | 0.947599306 | -1.360786726 | 2.229753906 | -0.610285611 | 0.541672627 | NA |             |
| Gm7517        | 0.414564125 | -1.361678416 | 3.610380855 | -0.377156447 | 0.706057345 | NA |             |
| Serpina3d-ps  | 0.410437757 | -1.361860374 | 3.610407462 | -0.377204066 | 0.706021959 | NA |             |
| Foxp4         | 1275.557245 | -1.361981112 | 0.245192906 | -5.55473295  | 2.78E-08    |    | 1.36E-07    |
| Rfc4          | 93.48943243 | -1.362026186 | 0.370468043 | -3.676501151 | 0.000236455 |    | 0.000670506 |
| Eif3s6-ps4    | 0.418572323 | -1.362173152 | 2.692802689 | -0.505857023 | 0.612957024 | NA |             |
| Gm6967        | 0.418618327 | -1.362285174 | 2.692768185 | -0.505905106 | 0.612923268 | NA |             |
| H2bc14        | 0.410983802 | -1.363188301 | 3.610380999 | -0.377574639 | 0.705746608 | NA |             |
| Ccl1          | 0.410999972 | -1.363227633 | 3.610380212 | -0.377585615 | 0.705738453 | NA |             |
| Slc13a3       | 687.2062981 | -1.36470131  | 0.364052441 | -3.748639364 | 0.000177797 |    | 0.000515139 |
| Tsen54        | 257.6270401 | -1.365040816 | 0.21523504  | -6.342093825 | 2.27E-10    |    | 1.42E-09    |
| Cenpa         | 222.4971769 | -1.365968226 | 0.439420794 | -3.108565285 | 0.001879981 |    | 0.004468756 |
| Olfr1181      | 0.417571946 | -1.366622644 | 3.170540388 | -0.431037765 | 0.666440911 | NA |             |
| Usp17c        | 0.948858218 | -1.366678023 | 2.302111542 | -0.593662817 | 0.552737657 | NA |             |
| Rab27a        | 74.70909463 | -1.367188545 | 0.276251391 | -4.949073879 | 7.46E-07    |    | 3.06E-06    |
| Lrrc27        | 16.54260007 | -1.368060051 | 0.599402539 | -2.2823728   | 0.02246734  |    | 0.041697453 |
| Bicd1         | 85.42238563 | -1.368902619 | 0.473993403 | -2.888020401 | 0.003876747 |    | 0.008631567 |
| Terb1         | 9.076907931 | -1.368911245 | 0.788918399 | -1.735174697 | 0.082709867 |    | 0.131044406 |
| Dnal1         | 89.33498296 | -1.368955266 | 0.370713164 | -3.692761409 | 0.000221832 |    | 0.000632407 |
| Npy           | 0.418561101 | -1.369387877 | 3.16915023  | -0.432099389 | 0.665669179 | NA |             |
| Tshz3         | 27.21953122 | -1.370497948 | 0.543078379 | -2.523573025 | 0.011616893 |    | 0.023222888 |
| Syt15         | 17.32046904 | -1.370569421 | 0.522991288 | -2.620635284 | 0.00877661  |    | 0.018059583 |
| Dpysl5        | 2.412947225 | -1.373324791 | 1.664492398 | -0.825071231 | 0.409331152 |    | 0.501806163 |
| Tanc1         | 473.0118724 | -1.374445257 | 0.183640994 | -7.484414152 | 7.19E-14    |    | 6.58E-13    |
| Rbm3          | 2273.58925  | -1.374659056 | 0.241522439 | -5.691641167 | 1.26E-08    |    | 6.44E-08    |
| Lgr6          | 12.82062126 | -1.374988051 | 0.889241704 | -1.546247826 | 0.122044727 |    | 0.182927599 |
| Trbv19        | 0.398260298 | -1.375104488 | 3.609647651 | -0.380952553 | 0.703238456 | NA |             |
| Flt1          | 248.6409035 | -1.37525602  | 0.260210224 | -5.285172873 | 1.26E-07    |    | 5.70E-07    |
| Dytn          | 1.68245455  | -1.375414102 | 1.714602374 | -0.802176716 | 0.422450743 |    | 0.514277368 |
| Gm3671        | 0.420604109 | -1.375758819 | 3.166030979 | -0.434537384 | 0.663898254 | NA |             |
| Cyp2b13       | 0.420932149 | -1.376707498 | 3.165534119 | -0.434905279 | 0.663631183 | NA |             |
| Sipa1         | 399.4966229 | -1.377602054 | 0.169756459 | -8.115167256 | 4.85E-16    |    | 5.46E-15    |
| Stk11ip       | 338.8276139 | -1.378148241 | 0.234311055 | -5.88170389  | 4.06E-09    |    | 2.20E-08    |
| Gm14048       | 0.424941611 | -1.378490285 | 2.686602928 | -0.513097887 | 0.60788285  | NA |             |
| Map1s         | 274.1234294 | -1.378529713 | 0.216280603 | -6.373801868 | 1.84E-10    |    | 1.17E-09    |
| Olfr143       | 0.957267488 | -1.378854387 | 1.829855207 | -0.753531964 | 0.451130311 | NA |             |
| Ovol1         | 0.969561428 | -1.378949016 | 2.259622892 | -0.61025626  | 0.541692067 | NA |             |
| Gm18996       | 0.425183387 | -1.379087199 | 2.686431888 | -0.51335275  | 0.607704591 | NA |             |
| Arhgap45      | 538.5791372 | -1.379141632 | 0.192559652 | -7.16215271  | 7.94E-13    |    | 6.57E-12    |
| Gask1a        | 215.4123099 | -1.379496022 | 0.374462516 | -3.683936214 | 0.00022966  |    | 0.000652649 |
| Msh2          | 320.0683434 | -1.379507723 | 0.171854865 | -8.027167133 | 9.97E-16    |    | 1.10E-14    |
| Gm1840        | 1.060034003 | -1.379623416 | 2.027398765 | -0.680489423 | 0.496194617 | NA |             |
| E330009J07Rik | 397.7656591 | -1.37962979  | 0.248348288 | -5.555221656 | 2.77E-08    |    | 1.36E-07    |
| Olfr633       | 1.696468601 | -1.37975944  | 1.752212725 | -0.787438317 | 0.431025324 |    | 0.522440079 |
| Pkd2l2        | 5.35818749  | -1.380405537 | 1.017728534 | -1.356359275 | 0.174984884 |    | 0.247954642 |
| Gm9703        | 0.425861823 | -1.380754127 | 2.685951532 | -0.514065169 | 0.607206429 | NA |             |
| Fgfbp3        | 35.36474693 | -1.380781518 | 0.514186033 | -2.685373443 | 0.007244881 |    | 0.015203191 |
| Bfsp1         | 3.120564088 | -1.381473448 | 1.237200227 | -1.11661267  | 0.264159972 |    | 0.349751414 |
| Myo7a         | 791.5429747 | -1.381803149 | 0.258325366 | -5.349080383 | 8.84E-08    |    | 4.08E-07    |
| Wdr86         | 15.38246218 | -1.38184495  | 0.526649517 | -2.623841675 | 0.008694419 |    | 0.01791641  |
| Zfpm2         | 20.03643299 | -1.382381428 | 0.525636875 | -2.629917144 | 0.008540568 |    | 0.017648437 |
| Upk1a         | 6.365232824 | -1.382474162 | 0.851915283 | -1.622783615 | 0.104635669 |    | 0.160430695 |



|               |             |              |             |              |             |    |             |
|---------------|-------------|--------------|-------------|--------------|-------------|----|-------------|
| Ighv1-61      | 0.401945892 | -1.383352304 | 3.609390159 | -0.383264829 | 0.701523414 | NA |             |
| Nhs1          | 658.1421438 | -1.383669375 | 0.146224363 | -9.46264593  | 3.00E-21    |    | 5.31E-20    |
| Sema4b        | 237.2192453 | -1.384490944 | 0.203787741 | -6.793789133 | 1.09E-11    |    | 7.97E-11    |
| Sox12         | 178.3399601 | -1.384787683 | 0.596184521 | -2.322750146 | 0.020192579 |    | 0.037899712 |
| Vwf           | 174.3882581 | -1.385288623 | 0.371052954 | -3.733398714 | 0.000188913 |    | 0.000545032 |
| Ripor1        | 571.2468518 | -1.385832863 | 0.206024526 | -6.726543153 | 1.74E-11    |    | 1.24E-10    |
| Asap1         | 502.9815884 | -1.386344044 | 0.315896937 | -4.388596033 | 1.14E-05    |    | 3.99E-05    |
| Cdk4          | 1375.846268 | -1.386896061 | 0.214797707 | -6.456754507 | 1.07E-10    |    | 6.96E-10    |
| Rgs11         | 47.44157318 | -1.386945392 | 0.560068877 | -2.476383617 | 0.013272089 |    | 0.026091164 |
| Cep112        | 15.0156555  | -1.387530603 | 0.829333031 | -1.673068058 | 0.094313899 |    | 0.146890494 |
| Cacng1        | 0.98062831  | -1.388020545 | 2.053903269 | -0.675796454 | 0.499169887 | NA |             |
| Cdk19         | 365.9569722 | -1.388259768 | 0.167885953 | -8.269064481 | 1.35E-16    |    | 1.60E-15    |
| Krt12         | 0.403339406 | -1.388565349 | 3.609026053 | -0.384747943 | 0.700424171 | NA |             |
| Eif6          | 1362.652997 | -1.388643893 | 0.215228281 | -6.451958298 | 1.10E-10    |    | 7.17E-10    |
| D630033A02Rik | 15.45388635 | -1.389292855 | 0.522746214 | -2.657681334 | 0.007868025 |    | 0.016381789 |
| Rac3          | 16.00601968 | -1.389698379 | 0.570444442 | -2.436167795 | 0.014843797 |    | 0.028822217 |
| Apbb2         | 404.982822  | -1.39059396  | 0.249581269 | -5.571708033 | 2.52E-08    |    | 1.25E-07    |
| Igkv8-19      | 3.501796393 | -1.39107338  | 1.458989068 | -0.953450174 | 0.34036203  |    | 0.432666609 |
| Slc2a10       | 4.727498567 | -1.391203724 | 1.090474502 | -1.275778315 | 0.202033895 |    | 0.279772061 |
| Tspoap1       | 37.65431191 | -1.391785463 | 0.537119088 | -2.591204623 | 0.009564061 |    | 0.019510363 |
| Ccdc85a       | 3.407962328 | -1.39235117  | 1.154764275 | -1.20574493  | 0.227915855 |    | 0.309923386 |
| Sptbn1        | 3208.876576 | -1.39333462  | 0.140603174 | -9.909695334 | 3.78E-23    |    | 7.65E-22    |
| Hr            | 51.49620754 | -1.393433203 | 0.477234615 | -2.919807486 | 0.003502477 |    | 0.00787526  |
| Kcnip3        | 16.81851688 | -1.393714818 | 0.688195161 | -2.025173812 | 0.04284952  |    | 0.073735602 |
| Gm21960       | 9.872658012 | -1.394651554 | 0.878575921 | -1.587400156 | 0.112422044 |    | 0.170741292 |
| Rsad2         | 255.0647175 | -1.395292559 | 0.444562856 | -3.138572062 | 0.001697732 |    | 0.004078767 |
| Sfn           | 60.35098527 | -1.395507742 | 0.350897842 | -3.976963024 | 6.98E-05    |    | 0.00021624  |
| Spaca9        | 3.367269594 | -1.395509685 | 1.304780091 | -1.069536311 | 0.284828076 |    | 0.373031347 |
| Tjap1         | 393.7918082 | -1.395969152 | 0.251907998 | -5.541583293 | 3.00E-08    |    | 1.46E-07    |
| Tmem209       | 369.479824  | -1.396106861 | 0.194797658 | -7.166959154 | 7.67E-13    |    | 6.36E-12    |
| Rbm38         | 149.0240157 | -1.397222573 | 0.332153993 | -4.206550582 | 2.59E-05    |    | 8.59E-05    |
| Olfm1         | 60.0861133  | -1.397288256 | 0.371603734 | -3.760156665 | 0.000169807 |    | 0.000494427 |
| Slc2a13       | 7.026111903 | -1.397582049 | 0.836250521 | -1.671248046 | 0.094672694 |    | 0.147381982 |
| Gm5507        | 1.063107867 | -1.397819774 | 1.949013421 | -0.717193508 | 0.473254704 | NA |             |
| Ccne2         | 22.22989241 | -1.397899909 | 0.614580541 | -2.274559338 | 0.022932378 |    | 0.042480841 |
| Fkbp11        | 731.8883463 | -1.398303083 | 0.201221661 | -6.949068385 | 3.68E-12    |    | 2.82E-11    |
| Cldn15        | 15.42816225 | -1.398329484 | 0.881639033 | -1.586056686 | 0.112726451 |    | 0.171127385 |
| Arhgef6       | 180.4021132 | -1.398873485 | 0.273666358 | -5.111601942 | 3.19E-07    |    | 1.38E-06    |
| Gbp8          | 133.9683966 | -1.399033115 | 0.344620348 | -4.059635843 | 4.91E-05    |    | 0.000155946 |
| Plxnb1        | 2488.512049 | -1.400144993 | 0.137294061 | -10.19814683 | 2.02E-24    |    | 4.54E-23    |
| Pice1         | 358.2792793 | -1.400341676 | 0.261557396 | -5.353859974 | 8.61E-08    |    | 3.98E-07    |
| Rab3b         | 6.253329057 | -1.400640529 | 1.082203348 | -1.294248933 | 0.195579449 |    | 0.272160514 |
| Olfr1490      | 0.472979528 | -1.401435164 | 2.638310941 | -0.531186503 | 0.595289545 | NA |             |
| Pomgnt2       | 86.34524307 | -1.401881812 | 0.26262604  | -5.337939106 | 9.40E-08    |    | 4.33E-07    |
| Nampt         | 1705.284788 | -1.402023685 | 0.228010181 | -6.148952125 | 7.80E-10    |    | 4.60E-09    |
| Gm3373        | 0.361014127 | -1.403964199 | 3.600879413 | -0.389894811 | 0.696614331 | NA |             |
| Rpap3-ps2     | 1.755124943 | -1.404740608 | 1.503536902 | -0.934290742 | 0.350153939 |    | 0.442592645 |
| Gm14732       | 0.435104019 | -1.404890164 | 2.677176973 | -0.524765519 | 0.599746204 | NA |             |
| Dpysl2        | 138.6072779 | -1.405102895 | 0.243081389 | -5.7803804   | 7.45E-09    |    | 3.92E-08    |
| Kcnip2        | 2.130772534 | -1.405336096 | 1.988667946 | -0.706672071 | 0.47977029  |    | 0.570053241 |
| Zkscan4       | 16.88796073 | -1.405782081 | 0.558662904 | -2.51633332  | 0.011858298 |    | 0.023638945 |
| Bcl11a        | 7.271883856 | -1.405930617 | 0.992513544 | -1.416535447 | 0.156618793 |    | 0.2259297   |
| Olfr165       | 0.43207942  | -1.4064305   | 3.148862711 | -0.446647132 | 0.655129859 | NA |             |
| Nkx2-6        | 0.983912433 | -1.406855664 | 2.009708926 | -0.700029564 | 0.483908841 | NA |             |
| Mgst2         | 32.64098794 | -1.407081056 | 0.562399702 | -2.501923545 | 0.01235206  |    | 0.024503436 |
| Gm48705       | 0.432384318 | -1.407317444 | 3.14852971  | -0.446976073 | 0.654892336 | NA |             |
| Ng11          | 187.0408573 | -1.407730265 | 0.345571929 | -4.073624463 | 4.63E-05    |    | 0.000147551 |
| Rpusd1        | 83.7647897  | -1.407788796 | 0.25688106  | -5.480313724 | 4.25E-08    |    | 2.03E-07    |
| Pold3         | 338.6079327 | -1.407965961 | 0.218718033 | -6.437356552 | 1.22E-10    |    | 7.87E-10    |
| Mthfd2        | 101.9198117 | -1.408317812 | 0.349355922 | -4.03118345  | 5.55E-05    |    | 0.000174494 |
| Cyp2d34-ps    | 0.410550976 | -1.408573612 | 3.608012961 | -0.390401483 | 0.696239691 | NA |             |
| Abcb1b        | 87.11047753 | -1.409231803 | 0.274575811 | -5.132396031 | 2.86E-07    |    | 1.24E-06    |
| B4gal1t4      | 42.13054755 | -1.40951857  | 0.346920681 | -4.062941902 | 4.85E-05    |    | 0.000153867 |
| Pgbd1         | 17.49420675 | -1.410368934 | 0.544860543 | -2.588495261 | 0.009639627 |    | 0.019643397 |
| Dchs1         | 83.40595774 | -1.410434563 | 0.34835732  | -4.04881564  | 5.15E-05    |    | 0.000162697 |
| Arhgap1       | 534.938076  | -1.411168549 | 0.209636411 | -6.731504994 | 1.68E-11    |    | 1.20E-10    |

|            |             |              |             |              |             |             |
|------------|-------------|--------------|-------------|--------------|-------------|-------------|
| Gnaz       | 14.34573348 | -1.412084672 | 0.551340003 | -2.561186678 | 0.010431529 | 0.02108069  |
| Gpr156     | 1.692557458 | -1.412088463 | 1.838075431 | -0.768242935 | 0.44234287  | 0.533389536 |
| Hcn1       | 1.143366423 | -1.412750133 | 1.824493394 | -0.774324608 | 0.438738855 | NA          |
| Hbl1       | 1039.911094 | -1.413005548 | 0.166826564 | -8.469907374 | 2.46E-17    | 3.14E-16    |
| Zfp791     | 63.08634753 | -1.413061302 | 0.408330996 | -3.460578099 | 0.000539017 | 0.001432449 |
| Ccl21b     | 8.50085187  | -1.413730989 | 1.194192384 | -1.183838558 | 0.236476976 | 0.319500672 |
| Arf2       | 336.2891804 | -1.41437578  | 0.253801099 | -5.572772484 | 2.51E-08    | 1.24E-07    |
| Gimap8     | 170.2431183 | -1.414687368 | 0.376901212 | -3.753469941 | 0.000174403 | 0.000506599 |
| Tagln      | 236.1382915 | -1.415226228 | 0.384468951 | -3.680989647 | 0.00023233  | 0.000659359 |
| Adarb1     | 405.1727043 | -1.415497127 | 0.352773046 | -4.012486622 | 6.01E-05    | 0.000187977 |
| B3gnt2     | 167.4574652 | -1.415649549 | 0.306963295 | -4.611787701 | 3.99E-06    | 1.49E-05    |
| Dtx1       | 41.19277808 | -1.416192021 | 0.715345535 | -1.979731404 | 0.047733718 | 0.081141133 |
| Slc39a10   | 162.0825048 | -1.416241432 | 0.287600545 | -4.924335009 | 8.46E-07    | 3.45E-06    |
| Galnt10    | 217.1902508 | -1.416414212 | 0.238952979 | -5.927585483 | 3.07E-09    | 1.69E-08    |
| Comp       | 1.604347213 | -1.416525065 | 1.575699715 | -0.898981609 | 0.368662457 | NA          |
| Tmem165    | 403.4235647 | -1.416805428 | 0.223162388 | -6.348764418 | 2.17E-10    | 1.37E-09    |
| Shd        | 6.680822034 | -1.417927758 | 1.29417018  | -1.095626974 | 0.273242052 | 0.359986757 |
| Olfr1442   | 2.962074971 | -1.417984233 | 1.368850192 | -1.035894389 | 0.300251416 | 0.389876315 |
| Itgb1bp2   | 4.25840636  | -1.418251657 | 1.207015028 | -1.175007456 | 0.239991733 | 0.323403609 |
| Lrrc8c     | 91.38600765 | -1.418764005 | 0.31698254  | -4.475842749 | 7.61E-06    | 2.73E-05    |
| Amph       | 0.433946125 | -1.418914149 | 3.607485525 | -0.393324974 | 0.694079475 | NA          |
| Tmem54     | 5.082023507 | -1.41899443  | 0.955618646 | -1.484896131 | 0.137571341 | 0.202252175 |
| Ccdc39     | 12.65981869 | -1.419285029 | 0.735390755 | -1.929973988 | 0.053610061 | 0.0895936   |
| Gramd4     | 293.8909965 | -1.419767907 | 0.190880362 | -7.437998835 | 1.02E-13    | 9.24E-13    |
| Ngr        | 70.02542426 | -1.420104057 | 0.637967339 | -2.225982382 | 0.026015362 | 0.047429139 |
| Cdyl2      | 20.07363157 | -1.420541178 | 0.501669817 | -2.831625764 | 0.004631202 | 0.010145557 |
| Sp6        | 7.001479301 | -1.421074311 | 0.888339414 | -1.599697467 | 0.109665714 | 0.167105926 |
| Gm1141     | 1.000950959 | -1.421100604 | 2.620018593 | -0.542400962 | 0.587542317 | NA          |
| Tmem51     | 296.2925674 | -1.421229341 | 0.185938507 | -7.643544971 | 2.11E-14    | 2.04E-13    |
| Pcdhgc4    | 246.8780134 | -1.421714435 | 0.28468363  | -4.994015412 | 5.91E-07    | 2.46E-06    |
| Gm13904    | 0.434987062 | -1.421908453 | 3.607365155 | -0.394168151 | 0.693456898 | NA          |
| Tmpo       | 1580.942661 | -1.422150641 | 0.143604315 | -9.903258389 | 4.03E-23    | 8.13E-22    |
| Rps12-ps26 | 1.801122303 | -1.422706387 | 1.720321245 | -0.827000417 | 0.408236825 | 0.500713173 |
| Gm49325    | 45.47627269 | -1.423359005 | 0.347798401 | -4.092482886 | 4.27E-05    | 0.000136762 |
| Otud1      | 226.2292478 | -1.423808168 | 0.274494114 | -5.187026235 | 2.14E-07    | 9.45E-07    |
| Flt3       | 24.45937164 | -1.423899115 | 0.696119974 | -2.045479471 | 0.040807611 | 0.070642583 |
| Eogt       | 252.8212711 | -1.424132546 | 0.205093969 | -6.943805075 | 3.82E-12    | 2.92E-11    |
| Btbd3      | 186.0603306 | -1.424674326 | 0.207573578 | -6.863466638 | 6.72E-12    | 5.02E-11    |
| Glg1       | 934.9704463 | -1.424758444 | 0.209335653 | -6.806095479 | 1.00E-11    | 7.37E-11    |
| Sectm1a    | 24.63134412 | -1.425314331 | 0.476206872 | -2.99305704  | 0.002761981 | 0.006341583 |
| Ugt1a7c    | 57.89056179 | -1.425461423 | 0.429605244 | -3.31807268  | 0.000906409 | 0.00230737  |
| Zbtb32     | 12.2741775  | -1.425504657 | 0.718715515 | -1.98340599  | 0.047322099 | 0.080505652 |
| Gm5820     | 0.968398626 | -1.426813197 | 2.22221827  | -0.64206708  | 0.520829629 | NA          |
| Kcnj5      | 12.48624211 | -1.427715    | 0.720698678 | -1.981015149 | 0.047589575 | 0.080904175 |
| Gm13868    | 3.711285277 | -1.428755683 | 1.106888745 | -1.290785266 | 0.196778148 | 0.273449126 |
| Gm7361     | 1.012693181 | -1.432812451 | 2.346689353 | -0.610567585 | 0.541485888 | NA          |
| Ldha-ps    | 0.441502502 | -1.433190385 | 3.135804495 | -0.457040733 | 0.647641768 | NA          |
| Abhd8      | 139.32299   | -1.434273584 | 0.231426563 | -6.197532226 | 5.74E-10    | 3.43E-09    |
| Efhdl      | 17.28380015 | -1.434706316 | 0.630629809 | -2.275037265 | 0.022903694 | 0.042432317 |
| Gm15014    | 0.442341862 | -1.435015615 | 3.134359489 | -0.457833768 | 0.647071874 | NA          |
| Stk26      | 15.32643412 | -1.435311859 | 0.619120928 | -2.318306155 | 0.020432688 | 0.038303988 |
| Ddit4      | 371.8577989 | -1.435653681 | 0.47928772  | -2.995390082 | 0.002740941 | 0.006298363 |
| Tjp2       | 1012.209055 | -1.435872108 | 0.227140372 | -6.321518706 | 2.59E-10    | 1.61E-09    |
| Dnaaf3     | 16.371149   | -1.436088269 | 0.565905523 | -2.537682019 | 0.011158932 | 0.022415162 |
| Slc6a2     | 4.017747879 | -1.43637163  | 1.089067146 | -1.318900893 | 0.187202248 | 0.26247421  |
| Endou      | 6.654998312 | -1.436413261 | 0.93603671  | -1.534569366 | 0.124889642 | 0.186568404 |
| Mis18a     | 104.1189544 | -1.436994848 | 0.286945106 | -5.007908539 | 5.50E-07    | 2.29E-06    |
| Map1a      | 15.1990501  | -1.437592483 | 0.538279481 | -2.6707176   | 0.00756893  | 0.015815064 |
| Golt1b     | 182.6860723 | -1.437714865 | 0.291607725 | -4.930304452 | 8.21E-07    | 3.36E-06    |
| H1f3       | 49.09312284 | -1.4380913   | 0.617780195 | -2.327836521 | 0.019920786 | 0.037439043 |
| Olfr371    | 1.007733551 | -1.438117827 | 3.265848693 | -0.440350415 | 0.659683332 | NA          |
| Arhgdia    | 3055.790995 | -1.438398091 | 0.169300975 | -8.496100456 | 1.96E-17    | 2.53E-16    |
| Matn2      | 81.30234689 | -1.438495651 | 0.282582032 | -5.090541822 | 3.57E-07    | 1.53E-06    |
| Bora       | 71.94524393 | -1.438596    | 0.407654932 | -3.528955222 | 0.000417204 | 0.001131301 |
| Gm47495    | 0.410144467 | -1.439220007 | 3.605700285 | -0.399151314 | 0.689781714 | NA          |
| Hip1       | 227.1043517 | -1.442068523 | 0.258070119 | -5.587894211 | 2.30E-08    | 1.14E-07    |



|           |             |              |             |              |                |             |
|-----------|-------------|--------------|-------------|--------------|----------------|-------------|
| Fsd1l     | 30.45559037 | -1.442963811 | 0.515127193 | -2.801179653 | 0.005091617    | 0.01105334  |
| D1Ert622e | 461.4960917 | -1.443565204 | 0.261260838 | -5.525379224 | 3.29E-08       | 1.60E-07    |
| Pde1a     | 47.74926322 | -1.443874786 | 0.500878579 | -2.882684238 | 0.003943025    | 0.008764105 |
| Crtap     | 229.7810746 | -1.444136586 | 0.261857994 | -5.514960854 | 3.49E-08       | 1.69E-07    |
| Krt88     | 0.432011013 | -1.444246824 | 3.606258554 | -0.400483438 | 0.68880048 NA  |             |
| Car2      | 392.6262183 | -1.444839685 | 0.304068409 | -4.751692843 | 2.02E-06       | 7.79E-06    |
| Zcchc3    | 13.83286983 | -1.446909731 | 0.610694761 | -2.369284664 | 0.01782253     | 0.03394085  |
| Lrrtm1    | 0.443889592 | -1.447065882 | 3.606896836 | -0.401194142 | 0.688277193 NA |             |
| Tmem138   | 85.75912767 | -1.447333628 | 0.259005807 | -5.588035445 | 2.30E-08       | 1.14E-07    |
| Gm15936   | 0.428606172 | -1.448230307 | 3.605956286 | -0.401621704 | 0.687962454 NA |             |
| Gm13623   | 0.428767386 | -1.448496447 | 3.605966537 | -0.401694367 | 0.68790897 NA  |             |
| Cenp1     | 207.2710356 | -1.448785581 | 0.239582815 | -6.047118104 | 1.47E-09       | 8.40E-09    |
| Trim55    | 0.429020215 | -1.448919274 | 3.60598174  | -0.401809931 | 0.687823913 NA |             |
| Ldhal6b   | 3.132341184 | -1.450136451 | 1.22042467  | -1.188222826 | 0.234745633    | 0.31756416  |
| Myef2     | 594.0257822 | -1.45029842  | 0.205992864 | -7.040527467 | 1.92E-12       | 1.52E-11    |
| Elf5      | 3.292270707 | -1.450503751 | 1.319397202 | -1.099368522 | 0.271607355    | 0.35822081  |
| Uqcrh-ps1 | 0.448006775 | -1.450504512 | 3.126944149 | -0.463872856 | 0.642738842 NA |             |
| Vwa1      | 41.2141192  | -1.451343428 | 0.439505296 | -3.302220566 | 0.000959226    | 0.002428406 |
| Olfr533   | 0.448349313 | -1.451389394 | 3.126400969 | -0.464236484 | 0.642478325 NA |             |
| Ralb      | 422.4417467 | -1.451633312 | 0.169311333 | -8.573751622 | 1.00E-17       | 1.32E-16    |
| Taf1c     | 91.40947512 | -1.451647092 | 0.254675802 | -5.699980442 | 1.20E-08       | 6.15E-08    |
| Rufy2     | 220.966897  | -1.451971282 | 0.212937842 | -6.81875644  | 9.18E-12       | 6.77E-11    |
| Gm49391   | 36.49786066 | -1.452189495 | 0.436764539 | -3.324879571 | 0.000884567    | 0.002257487 |
| Peak1     | 456.1650547 | -1.452681443 | 0.187454667 | -7.749508026 | 9.22E-15       | 9.22E-14    |
| Galnt9    | 1.914455209 | -1.452891513 | 1.636701216 | -0.887695016 | 0.374704827    | 0.466786109 |
| Dhrs9     | 102.2920598 | -1.45295845  | 0.502154607 | -2.893448413 | 0.003810369    | 0.008502509 |
| Ccr5      | 184.0123049 | -1.453201301 | 0.292493052 | -4.968327593 | 6.75E-07       | 2.79E-06    |
| Lrrc38    | 0.411392182 | -1.45364033  | 3.605759247 | -0.403144034 | 0.686842268 NA |             |
| Plpp2     | 781.6647543 | -1.45379264  | 0.141847279 | -10.24899914 | 1.20E-24       | 2.74E-23    |
| Glipr1    | 51.65092441 | -1.45430127  | 0.544472939 | -2.671025806 | 0.007561983    | 0.01580427  |
| Cchcr1    | 213.0486888 | -1.455106397 | 0.271506205 | -5.359385421 | 8.35E-08       | 3.87E-07    |
| Gm9788    | 1.078809032 | -1.455769819 | 2.222605876 | -0.65498334  | 0.512478481 NA |             |
| Ppfia3    | 2.391630657 | -1.45733109  | 1.37869215  | -1.057038796 | 0.290493882    | 0.379489632 |
| Mgat5b    | 0.431447983 | -1.457711903 | 3.113383935 | -0.468208205 | 0.639635705 NA |             |
| Frmf5     | 2.764659913 | -1.460831871 | 1.336312781 | -1.093181096 | 0.274314295    | 0.36114836  |
| Ephb4     | 712.1638448 | -1.461640974 | 0.244121612 | -5.987347701 | 2.13E-09       | 1.19E-08    |
| Ackr3     | 30.4716363  | -1.461768576 | 0.51039989  | -2.863967264 | 0.004183712    | 0.009258039 |
| Ugt8a     | 12.82801392 | -1.462399215 | 0.645881757 | -2.264190309 | 0.023562412    | 0.043491989 |
| Zbtb8b    | 6.050009667 | -1.462420349 | 1.030381699 | -1.419299615 | 0.155811684    | 0.225031989 |
| F11r      | 2931.010168 | -1.462565383 | 0.10866636  | -13.45922863 | 2.72E-41       | 2.25E-39    |
| Ssu2      | 2.746520297 | -1.463231823 | 1.289019927 | -1.135150662 | 0.256312198    | 0.341215863 |
| Chek1     | 47.46082126 | -1.464704167 | 0.610222299 | -2.40027965  | 0.016382551    | 0.031479906 |
| Stard9    | 217.9991463 | -1.465696572 | 0.238934507 | -6.13430262  | 8.55E-10       | 5.02E-09    |
| Gm13413   | 0.431919861 | -1.46603669  | 3.090457152 | -0.474375349 | 0.635232269 NA |             |
| Ptgs1     | 245.8006068 | -1.466112266 | 0.331992749 | -4.41609725  | 1.00E-05       | 3.55E-05    |
| Mgat5     | 344.8829864 | -1.466373655 | 0.283021473 | -5.181139224 | 2.21E-07       | 9.71E-07    |
| Gm11991   | 0.432205089 | -1.467182273 | 3.090068713 | -0.474805711 | 0.634925462 NA |             |
| Prrt2     | 14.53653654 | -1.467429136 | 0.880101973 | -1.6673399   | 0.095446837    | 0.148410952 |
| Rassf4    | 259.0272615 | -1.467452474 | 0.20833074  | -7.04385956  | 1.87E-12       | 1.49E-11    |
| Gm10392   | 0.432321365 | -1.467646705 | 3.089910458 | -0.474980335 | 0.63480099 NA  |             |
| Hes2      | 0.432375733 | -1.46786349  | 3.089836485 | -0.475061867 | 0.634742877 NA |             |
| Gm5205    | 0.434071667 | -1.468523616 | 3.088024074 | -0.475554458 | 0.634391827 NA |             |
| Eqtn      | 1.006628417 | -1.468758164 | 2.273466087 | -0.646043578 | 0.518251134 NA |             |
| Tspan5    | 24.01617487 | -1.468803535 | 0.468357319 | -3.136074691 | 0.001712256    | 0.004107294 |
| Minar1    | 4.67685856  | -1.468810829 | 0.964024542 | -1.523623897 | 0.12760269     | 0.189922356 |
| Hddc2     | 61.36985162 | -1.468842429 | 0.413337108 | -3.553618587 | 0.00037997     | 0.001037598 |
| Adgre4    | 60.95569012 | -1.46891285  | 0.710475273 | -2.067507353 | 0.038686372    | 0.067394775 |
| Fzd7      | 703.3354441 | -1.469263164 | 0.213282985 | -6.888796886 | 5.63E-12       | 4.24E-11    |
| Rras2     | 681.1004489 | -1.46928844  | 0.208137771 | -7.059210975 | 1.67E-12       | 1.34E-11    |
| Scamp5    | 652.3123262 | -1.469354886 | 0.236183544 | -6.221241579 | 4.93E-10       | 2.97E-09    |
| Smarcd3   | 74.28157301 | -1.469367458 | 0.441630649 | -3.327141041 | 0.00087742     | 0.002241944 |
| Tnfrsf26  | 22.12579478 | -1.469505997 | 0.463084328 | -3.173301079 | 0.001507161    | 0.003658042 |
| Cst6      | 1.804061642 | -1.469878231 | 1.655132668 | -0.888072757 | 0.374501616    | 0.466669363 |
| Cep170    | 388.9176146 | -1.47013907  | 0.184465409 | -7.969727648 | 1.59E-15       | 1.71E-14    |
| Gm6641    | 2.329899609 | -1.470170884 | 1.685675738 | -0.872155214 | 0.383123708    | 0.475294206 |
| Krt18     | 11270.93849 | -1.471135387 | 0.185456129 | -7.932525056 | 2.15E-15       | 2.28E-14    |

|               |             |              |             |              |                |             |
|---------------|-------------|--------------|-------------|--------------|----------------|-------------|
| Phf11d        | 151.7588874 | -1.471807717 | 0.325861358 | -4.516668455 | 6.28E-06       | 2.29E-05    |
| Sowahb        | 160.5581772 | -1.472106766 | 0.299094044 | -4.921885932 | 8.57E-07       | 3.49E-06    |
| Ankrd65       | 0.439528661 | -1.472356934 | 3.066549223 | -0.480134779 | 0.631131559 NA |             |
| Sycp2         | 2.155868527 | -1.472755279 | 1.516255932 | -0.971310481 | 0.331393691    | 0.423635246 |
| Slc22a12      | 1.150614349 | -1.472933795 | 2.328197068 | -0.632649965 | 0.526962251 NA |             |
| Tcf21         | 119.4487296 | -1.473080454 | 0.391374765 | -3.763861617 | 0.000167309    | 0.000487488 |
| Gucy1a1       | 198.1840941 | -1.47315495  | 0.327708619 | -4.49531951  | 6.95E-06       | 2.51E-05    |
| Ldhd          | 52.03753821 | -1.47349007  | 0.48251527  | -3.053768786 | 0.002259862    | 0.005286241 |
| Olig3         | 0.441155631 | -1.474391741 | 3.064955135 | -0.481048393 | 0.630482105 NA |             |
| Cct3-ps1      | 0.441259107 | -1.47467129  | 3.064812508 | -0.481161991 | 0.630401372 NA |             |
| Gal3st2b      | 6.535157855 | -1.475396626 | 0.795189483 | -1.855402591 | 0.063538758    | 0.103875023 |
| Prg2          | 1.792279382 | -1.475420508 | 1.580553091 | -0.933483675 | 0.350570295    | 0.442967862 |
| lqce          | 315.602663  | -1.475880917 | 0.260231441 | -5.671416612 | 1.42E-08       | 7.19E-08    |
| Rad18         | 63.82730412 | -1.476590585 | 0.393796    | -3.749633277 | 0.000177093    | 0.000513538 |
| Gm15157       | 1.040453256 | -1.476849253 | 2.044515164 | -0.72234693  | 0.470081206 NA |             |
| Pkd2          | 996.2065096 | -1.477012654 | 0.185080183 | -7.980393306 | 1.46E-15       | 1.58E-14    |
| Trbc1         | 27.66616987 | -1.477170281 | 0.6129905   | -2.409776793 | 0.015962283    | 0.030786853 |
| B9d1          | 33.88088278 | -1.478317959 | 0.460292411 | -3.2116931   | 0.001319553    | 0.003251108 |
| Lrrc3-rs7     | 4.224292    | -1.478506414 | 1.185070784 | -1.247610213 | 0.212173836    | 0.291375831 |
| Trcc1         | 122.6138975 | -1.479911661 | 0.258973413 | -5.714531259 | 1.10E-08       | 5.67E-08    |
| Itgb5         | 2068.19437  | -1.479933189 | 0.135976104 | -10.88377402 | 1.38E-27       | 3.93E-26    |
| Mmel1         | 0.455584563 | -1.480096596 | 3.604486141 | -0.410626241 | 0.681346619 NA |             |
| Tmem150c      | 16.84576594 | -1.480167765 | 0.576000886 | -2.569731751 | 0.010177729    | 0.0206412   |
| Ptpn21        | 772.572328  | -1.480590014 | 0.285601587 | -5.184109902 | 2.17E-07       | 9.58E-07    |
| Ttc25         | 21.35999919 | -1.480667485 | 0.512652437 | -2.888248214 | 0.00387394     | 0.008627425 |
| Tmem178b      | 4.738623503 | -1.480891031 | 0.983918954 | -1.505094525 | 0.132299776    | 0.195836293 |
| Cd1d2         | 9.833426215 | -1.48104348  | 0.81177156  | -1.824458447 | 0.068082793    | 0.110477389 |
| Zfp61         | 17.69586518 | -1.481067393 | 0.584771362 | -2.53272901  | 0.011317841    | 0.022702266 |
| Gjc1          | 20.14502509 | -1.481388474 | 0.464896917 | -3.186488057 | 0.001440114    | 0.003517345 |
| Slc16a9       | 53.87645351 | -1.481546993 | 0.401340936 | -3.69149235  | 0.000222942    | 0.000634934 |
| Oas1c         | 52.7078442  | -1.482038631 | 0.431858557 | -3.431768591 | 0.000599659    | 0.00157884  |
| Zscan18       | 7.058488798 | -1.482662217 | 0.912019449 | -1.625691446 | 0.104015311    | 0.159608732 |
| Rps4x-ps      | 0.456543327 | -1.482737935 | 3.604385614 | -0.411370506 | 0.680800877 NA |             |
| Btn1a1        | 0.441517753 | -1.483215028 | 3.604335268 | -0.411508619 | 0.680699623 NA |             |
| Kif3b         | 350.1278318 | -1.483263635 | 0.26626341  | -5.570662668 | 2.54E-08       | 1.25E-07    |
| Gm28900       | 29.9886047  | -1.483420175 | 1.75660353  | -0.844482064 | 0.398400082    | 0.491136351 |
| Aqp7          | 5.607115318 | -1.484059514 | 1.192185028 | -1.244823144 | 0.213196767    | 0.292662733 |
| Olf1r1388     | 38.75618246 | -1.484511279 | 0.4618924   | -3.213976416 | 0.001309104    | 0.003229288 |
| Frem2         | 10.15413452 | -1.485492363 | 1.313980487 | -1.13052848  | 0.258253605    | 0.343217242 |
| Ago2          | 724.16936   | -1.48567091  | 0.215300336 | -6.900457936 | 5.18E-12       | 3.92E-11    |
| Gimap3        | 97.96891007 | -1.486121631 | 0.331645132 | -4.481059686 | 7.43E-06       | 2.67E-05    |
| 1810049J17Rik | 1.852724004 | -1.486464795 | 1.781054542 | -0.834598133 | 0.403944014    | 0.496892817 |
| Tafa3         | 4.945318007 | -1.487158386 | 0.961635018 | -1.546489425 | 0.121986412    | 0.18285633  |
| Gm44245       | 12.18588323 | -1.487476266 | 0.687699895 | -2.162972944 | 0.030543261    | 0.054672565 |
| Ppp1r1b       | 409.516818  | -1.488058299 | 0.478451615 | -3.110154201 | 0.001869897    | 0.004449128 |
| Git1          | 496.0869688 | -1.488262197 | 0.232702992 | -6.395543869 | 1.60E-10       | 1.02E-09    |
| Gm14336       | 0.452508743 | -1.489700099 | 3.604017463 | -0.413344307 | 0.679354373 NA |             |
| Slc6a15       | 0.452508743 | -1.489700099 | 3.604017463 | -0.413344307 | 0.679354373 NA |             |
| Ngb           | 4.569102759 | -1.490050232 | 1.181762062 | -1.260871608 | 0.207355109    | 0.28602556  |
| Zfp382        | 8.224722592 | -1.490386024 | 1.061092184 | -1.404577328 | 0.160147002    | 0.229997446 |
| Gm17415       | 0.447704207 | -1.491143397 | 3.055938981 | -0.487949336 | 0.625585728 NA |             |
| Gm48348       | 92.54964765 | -1.4914381   | 0.367252731 | -4.061067415 | 4.88E-05       | 0.00015505  |
| Tctn3         | 62.11152218 | -1.491582101 | 0.40095982  | -3.720028855 | 0.0001992      | 0.000572482 |
| Tmem202       | 2.874589112 | -1.492145226 | 1.25870358  | -1.18546197  | 0.235834842    | 0.318784681 |
| Mphosph6      | 163.8454582 | -1.49390787  | 0.225096519 | -6.63674355  | 3.21E-11       | 2.22E-10    |
| Mettl24       | 2.901991572 | -1.494743563 | 1.394795482 | -1.071657875 | 0.283873728    | 0.371924325 |
| Bex6          | 0.442594598 | -1.494919983 | 3.075210852 | -0.486119507 | 0.626882437 NA |             |
| Vasn          | 433.6005689 | -1.49504578  | 0.245283166 | -6.095182979 | 1.09E-09       | 6.35E-09    |
| Il7r          | 36.94694134 | -1.495777535 | 0.472043574 | -3.168727671 | 0.001531078    | 0.003711862 |
| Arfgap3       | 315.9127409 | -1.496690168 | 0.24599921  | -6.08412591  | 1.17E-09       | 6.77E-09    |
| Apol7c        | 10.16509635 | -1.497177027 | 1.169565075 | -1.280114342 | 0.200504925    | 0.277857907 |
| Tanc2         | 222.9683891 | -1.497618559 | 0.341650723 | -4.383478387 | 1.17E-05       | 4.08E-05    |
| Tspan9        | 925.0152297 | -1.497645033 | 0.195176692 | -7.673278079 | 1.68E-14       | 1.63E-13    |
| Cuedc1        | 161.4787588 | -1.498124789 | 0.231046638 | -6.484079594 | 8.93E-11       | 5.88E-10    |
| Cd9           | 778.1903207 | -1.498553639 | 0.188390914 | -7.954489969 | 1.80E-15       | 1.93E-14    |
| Nid2          | 543.9751417 | -1.498813538 | 0.271140886 | -5.527803502 | 3.24E-08       | 1.57E-07    |

|               |             |              |             |              |             |             |
|---------------|-------------|--------------|-------------|--------------|-------------|-------------|
| Sh2d6         | 1.011315529 | -1.498896761 | 2.045414557 | -0.732808298 | 0.463675359 | NA          |
| Grik3         | 3.966801177 | -1.498994795 | 1.158699351 | -1.293687439 | 0.195773406 | 0.272319274 |
| Slc14a1       | 12.97764498 | -1.499074145 | 0.736231514 | -2.036145041 | 0.041735793 | 0.072015364 |
| Slc22a27      | 20.15312444 | -1.499377643 | 0.547682152 | -2.737678483 | 0.006187453 | 0.013170646 |
| Kif3a         | 147.0795524 | -1.499409495 | 0.279271476 | -5.369003373 | 7.92E-08    | 3.68E-07    |
| C1qtnf4       | 21.06725923 | -1.500645427 | 0.851479502 | -1.762397596 | 0.078002145 | 0.124453024 |
| Dsp           | 1697.627098 | -1.501268715 | 0.244722426 | -6.134577619 | 8.54E-10    | 5.02E-09    |
| Slc12a4       | 866.8939569 | -1.502114147 | 0.197095338 | -7.621256606 | 2.51E-14    | 2.41E-13    |
| St6gal1       | 1613.447634 | -1.502672388 | 0.248800057 | -6.039678633 | 1.54E-09    | 8.78E-09    |
| Tdrd12        | 5.359354899 | -1.503188895 | 1.037717197 | -1.448553517 | 0.14746231  | 0.214793016 |
| Cdca4         | 144.9121147 | -1.50364418  | 0.234761318 | -6.404991223 | 1.50E-10    | 9.64E-10    |
| Tex9          | 74.19994402 | -1.504014692 | 0.347137872 | -4.332614829 | 1.47E-05    | 5.07E-05    |
| Asb4          | 6.370184824 | -1.504510067 | 0.836454291 | -1.798675772 | 0.072069984 | 0.116085514 |
| Slx4          | 205.7491631 | -1.504989491 | 0.334687989 | -4.496694054 | 6.90E-06    | 2.50E-05    |
| Cdc42ep3      | 54.99839265 | -1.50531062  | 0.406457231 | -3.70349081  | 0.000212653 | 0.000608171 |
| Il15          | 56.54548935 | -1.506352162 | 0.386989724 | -3.892486205 | 9.92E-05    | 0.000300344 |
| Galnt2        | 261.1066759 | -1.506386306 | 0.341407165 | -4.412286736 | 1.02E-05    | 3.61E-05    |
| Trem14        | 50.81279846 | -1.506859491 | 0.704941423 | -2.137566955 | 0.032551906 | 0.057854972 |
| Rgs12         | 138.4772457 | -1.508000118 | 0.271133392 | -5.561838426 | 2.67E-08    | 1.31E-07    |
| P1xn3         | 9.151678634 | -1.508094476 | 0.726028279 | -2.077184209 | 0.037784561 | 0.065999098 |
| Gpr75         | 1.0400202   | -1.508724993 | 2.203174156 | -0.684796065 | 0.493472619 | NA          |
| Grm8          | 57.15623125 | -1.509228275 | 0.435938634 | -3.46202001  | 0.000536137 | 0.001425241 |
| Tab1          | 227.3943705 | -1.509230122 | 0.240499482 | -6.275398647 | 3.49E-10    | 2.14E-09    |
| Itgb7         | 64.72580786 | -1.50931401  | 0.445220579 | -3.390036496 | 0.000698833 | 0.00181335  |
| Gm14829       | 0.448495751 | -1.509716834 | 3.066950921 | -0.492250334 | 0.622540261 | NA          |
| Adm           | 40.25230775 | -1.50974978  | 0.522104747 | -2.891660704 | 0.003832116 | 0.008544325 |
| C2cd4b        | 0.448522756 | -1.509837116 | 3.066916981 | -0.492298006 | 0.622508689 | NA          |
| Map3k6        | 65.27157484 | -1.51012594  | 0.53713156  | -2.811463805 | 0.004931664 | 0.010736178 |
| Fnd3c2        | 0.448617102 | -1.510256247 | 3.066798421 | -0.492453706 | 0.622398641 | NA          |
| Fkbp9         | 1017.776631 | -1.510578279 | 0.130216564 | -11.60050791 | 4.10E-31    | 1.57E-29    |
| Syngap1       | 114.5066076 | -1.510797646 | 0.453589524 | -3.330759564 | 0.000866094 | 0.002214664 |
| Gm7730        | 0.455687195 | -1.511151335 | 3.045209229 | -0.496238919 | 0.619725856 | NA          |
| A930035D04Rik | 3.716465618 | -1.511323657 | 1.322742413 | -1.142568381 | 0.25321784  | 0.338046808 |
| Snx12         | 268.7859378 | -1.511560069 | 0.18119641  | -8.342108254 | 7.30E-17    | 8.87E-16    |
| Shroom4       | 39.58888549 | -1.511583254 | 0.457115803 | -3.30678407  | 0.000943736 | 0.002393456 |
| Dazl          | 1.052508101 | -1.514448058 | 2.226664949 | -0.680141868 | 0.496414636 | NA          |
| 9930012K11Rik | 19.50571893 | -1.515931751 | 0.573016504 | -2.645528951 | 0.008156331 | 0.01691801  |
| Egr2          | 41.24817557 | -1.516441132 | 0.612955649 | -2.473981818 | 0.01336165  | 0.026243019 |
| Adgre5        | 434.6850108 | -1.51688837  | 0.309298313 | -4.904289187 | 9.38E-07    | 3.80E-06    |
| Clec2g        | 1.029087199 | -1.517157808 | 2.241596533 | -0.676820197 | 0.498520042 | NA          |
| Case1         | 9.602497184 | -1.517601464 | 0.792124148 | -1.915863149 | 0.053382517 | 0.092113283 |
| Hist1h2an     | 0.458122129 | -1.517834363 | 3.602605838 | -0.42131569  | 0.673524575 | NA          |
| Vipr2         | 2.904342799 | -1.517893681 | 1.327259688 | -1.143629762 | 0.252777213 | 0.337564306 |
| Cr2           | 14.4182024  | -1.518094642 | 0.683467461 | -2.221165933 | 0.026339725 | 0.047969194 |
| Gm9855        | 1.150810526 | -1.518927343 | 1.911433464 | -0.794653526 | 0.426815073 | NA          |
| Ntpr          | 247.6289603 | -1.5192566   | 0.195929383 | -7.754102933 | 8.90E-15    | 8.91E-14    |
| Icam2         | 56.55604794 | -1.521245793 | 0.403545872 | -3.76969732  | 0.000163446 | 0.000476964 |
| Myh15         | 0.455906782 | -1.521696118 | 3.602510205 | -0.422398836 | 0.672733927 | NA          |
| Ip6k3         | 0.455968304 | -1.521808242 | 3.602511587 | -0.422429798 | 0.672711332 | NA          |
| Slc45a4       | 346.05745   | -1.522163524 | 0.193247084 | -7.876773564 | 3.36E-15    | 3.50E-14    |
| Mfsd13b       | 0.460370261 | -1.523776226 | 3.602396987 | -0.422989535 | 0.672302897 | NA          |
| Gm3512        | 0.46039433  | -1.523839706 | 3.602394762 | -0.423007418 | 0.672289849 | NA          |
| Edil3         | 1.049058716 | -1.524172666 | 1.797344758 | -0.848013526 | 0.396430438 | NA          |
| Tox2          | 26.3512691  | -1.524634001 | 0.604200305 | -2.523391642 | 0.011622887 | 0.023232147 |
| Pcolce2       | 26.5474042  | -1.527059436 | 0.621131566 | -2.458512043 | 0.01395141  | 0.027285033 |
| Ptchd4        | 1.043578476 | -1.528618213 | 2.199750992 | -0.694905114 | 0.487114768 | NA          |
| Fabp4         | 316.8089616 | -1.528859907 | 0.230732531 | -6.62611337  | 3.45E-11    | 2.37E-10    |
| Sptan1        | 5171.244513 | -1.528956382 | 0.137875808 | -11.08937382 | 1.41E-28    | 4.36E-27    |
| Kif26a        | 36.61477861 | -1.529931301 | 0.505380658 | -3.02728503  | 0.002467612 | 0.005723516 |
| Eva1c         | 33.67044664 | -1.530972668 | 0.464136819 | -3.298537429 | 0.000971899 | 0.002457206 |
| Lhx6          | 144.5072143 | -1.53135273  | 0.450018194 | -3.402868483 | 0.000666824 | 0.001737696 |
| Nlrp1b        | 46.15582509 | -1.531664428 | 0.567714214 | -2.697949761 | 0.006976797 | 0.014693074 |
| Nlynt1c       | 149.100691  | -1.532038969 | 0.311038435 | -4.925561587 | 8.41E-07    | 3.43E-06    |
| Gab1          | 391.7648975 | -1.532331076 | 0.168702912 | -9.083014961 | 1.06E-19    | 1.64E-18    |
| A130006112Rik | 2.874150043 | -1.532347834 | 1.18601401  | -1.292014952 | 0.196351967 | 0.272945884 |
| Gm15808       | 0.463762757 | -1.532445209 | 3.03489829  | -0.504941208 | 0.61360013  | NA          |

|               |             |              |             |              |             |    |             |
|---------------|-------------|--------------|-------------|--------------|-------------|----|-------------|
| Igkv5-45      | 0.445099122 | -1.533027451 | 3.601894982 | -0.425616921 | 0.670387009 | NA |             |
| Sptlc2        | 932.6208646 | -1.533351242 | 0.178446275 | -8.592789298 | 8.49E-18    |    | 1.12E-16    |
| Gjc2          | 29.00939017 | -1.534425038 | 0.418380339 | -3.667536199 | 0.000244899 |    | 0.000692377 |
| Gm2522        | 1.050156059 | -1.534787771 | 1.978952209 | -0.775555754 | 0.438011334 | NA |             |
| Fhod3         | 43.62615181 | -1.535197972 | 0.516770556 | -2.970753568 | 0.002970701 |    | 0.000678426 |
| Gm6912        | 0.469162732 | -1.535847783 | 3.601845356 | -0.426405809 | 0.669812169 | NA |             |
| Chsy1         | 126.9596318 | -1.536006552 | 0.313927727 | -4.892866799 | 9.94E-07    |    | 4.01E-06    |
| Gm8865        | 0.469225607 | -1.536024472 | 3.601836747 | -0.426455883 | 0.669775688 | NA |             |
| Adnp          | 166.31      | -1.53609262  | 0.482373096 | -3.184449204 | 0.001450298 |    | 0.003537149 |
| Gm12219       | 0.447570766 | -1.537059015 | 3.601874897 | -0.42673859  | 0.66956974  | NA |             |
| Tpm1          | 1419.552968 | -1.537339658 | 0.233318123 | -6.589028068 | 4.43E-11    |    | 3.01E-10    |
| Casp1         | 72.37339761 | -1.537354138 | 0.38051239  | -4.040220975 | 5.34E-05    |    | 0.00016837  |
| Slc9b2        | 55.08610766 | -1.53777299  | 0.533545508 | -2.882177745 | 0.003949369 |    | 0.008777062 |
| 6030445D17Rik | 9.541108651 | -1.537859178 | 0.802852196 | -1.915494764 | 0.055429436 |    | 0.092173335 |
| Rps12-ps4     | 1.89067426  | -1.538475989 | 1.996280744 | -0.770671156 | 0.440901873 |    | 0.532065911 |
| Krt8          | 13415.54455 | -1.53905547  | 0.218866142 | -7.031948646 | 2.04E-12    |    | 1.61E-11    |
| Sgcd          | 2.121284166 | -1.539533034 | 1.434329717 | -1.073346676 | 0.2831156   |    | 0.371073634 |
| Ica1l         | 2.564846069 | -1.539678916 | 1.46162748  | -1.053400362 | 0.292157539 |    | 0.381370729 |
| Igfbp6        | 56.04526798 | -1.540989097 | 0.496288402 | -3.105027419 | 0.001902614 |    | 0.004518774 |
| Tbc1d10c      | 48.49510207 | -1.541731503 | 0.429272872 | -3.591495303 | 0.000328786 |    | 0.000906835 |
| Serpinb8      | 86.87264704 | -1.541732942 | 0.378649875 | -4.07165839  | 4.67E-05    |    | 0.000148608 |
| Kif19a        | 9.667430825 | -1.543392815 | 0.687444575 | -2.245116001 | 0.024760687 |    | 0.045431592 |
| Fkbp5         | 1315.029954 | -1.543696608 | 0.412337185 | -3.743772487 | 0.000181278 |    | 0.000524245 |
| 1110002E22Rik | 0.472482915 | -1.5451958   | 3.601416876 | -0.429052191 | 0.667885244 | NA |             |
| Prmt1         | 676.9125356 | -1.54596696  | 0.203644652 | -7.59149304  | 3.16E-14    |    | 3.01E-13    |
| Cnksr3        | 229.1515288 | -1.546659142 | 0.34560539  | -4.475217078 | 7.63E-06    |    | 2.74E-05    |
| Rps6ka3       | 491.468157  | -1.547307579 | 0.249910028 | -6.191458539 | 5.96E-10    |    | 3.56E-09    |
| Gm12830       | 0.470425414 | -1.547660112 | 2.576378706 | -0.60071142  | 0.548032211 | NA |             |
| Gm10167       | 0.470459527 | -1.547684394 | 2.576365536 | -0.600723916 | 0.548023887 | NA |             |
| Wdhd1         | 98.41429238 | -1.54771909  | 0.428298129 | -3.613648966 | 0.000301918 |    | 0.00083788  |
| Sufu          | 150.9611359 | -1.548009938 | 0.237383339 | -6.52113979  | 6.98E-11    |    | 4.66E-10    |
| Gpr4          | 24.2796891  | -1.549347137 | 0.465930015 | -3.325278663 | 0.000883302 |    | 0.002254947 |
| Slc37a1       | 200.5454111 | -1.550344987 | 0.418574599 | -3.703867816 | 0.000212337 |    | 0.000607471 |
| Pcdhgb2       | 17.91148705 | -1.550415758 | 0.647494814 | -2.394483669 | 0.016643785 |    | 0.031913535 |
| Sp100         | 377.3656856 | -1.550525442 | 0.304992789 | -5.083810177 | 3.70E-07    |    | 1.58E-06    |
| Zfp287        | 12.44293651 | -1.550609597 | 0.64187998  | -2.415731361 | 0.015703642 |    | 0.030336056 |
| Zfp647        | 34.38211949 | -1.550796    | 0.417913736 | -3.710804089 | 0.000206602 |    | 0.000591859 |
| Unc13c        | 2.36330659  | -1.551034913 | 1.46214409  | -1.060794845 | 0.288783145 |    | 0.377630978 |
| Eda           | 86.15030878 | -1.551249621 | 0.461681867 | -3.359996857 | 0.000779434 |    | 0.002004795 |
| Ksr1          | 77.45109489 | -1.552758127 | 0.302934767 | -5.125717806 | 2.96E-07    |    | 1.28E-06    |
| Twist2        | 1.928953534 | -1.553015551 | 1.480737305 | -1.048812336 | 0.294264499 |    | 0.383533729 |
| Syn2          | 7.723845856 | -1.55305212  | 0.821731088 | -1.889976104 | 0.058761156 |    | 0.097022779 |
| Ifit1         | 360.1572396 | -1.553227347 | 0.34291493  | -4.529483    | 5.91E-06    |    | 2.16E-05    |
| Dck           | 206.820613  | -1.553954026 | 0.304928605 | -5.09612415  | 3.47E-07    |    | 1.49E-06    |
| Prickle2      | 54.44268248 | -1.553968586 | 0.379545668 | -4.094286183 | 4.23E-05    |    | 0.000135804 |
| Gm8775        | 0.476136776 | -1.554392356 | 3.60099334  | -0.431656548 | 0.665991052 | NA |             |
| Dnase1        | 29.41135814 | -1.555546371 | 0.858103803 | -1.812771795 | 0.069867026 |    | 0.112974775 |
| Timeless      | 137.5211121 | -1.555619375 | 0.252457274 | -6.161911487 | 7.19E-10    |    | 4.25E-09    |
| Kcnq4         | 14.68730372 | -1.555893676 | 0.687472605 | -2.263208255 | 0.023622855 |    | 0.043584678 |
| Gpr143        | 0.47902995  | -1.555977376 | 3.09201221  | -0.503224849 | 0.614806196 | NA |             |
| Gabra3        | 64.49454804 | -1.556490795 | 0.37344537  | -4.167920989 | 3.07E-05    |    | 0.000100661 |
| Sptbn4        | 3.931306359 | -1.556552417 | 1.006507099 | -1.546489257 | 0.121986453 |    | 0.18285633  |
| 4921536K21Rik | 1.059328408 | -1.556754344 | 2.18732199  | -0.711717045 | 0.47664001  | NA |             |
| Samd5         | 38.54960958 | -1.557596288 | 0.407512468 | -3.82220523  | 0.000132264 |    | 0.000391386 |
| P2ry14        | 35.81540312 | -1.557599621 | 0.517390591 | -3.010490811 | 0.002608258 |    | 0.006019438 |
| Gm47052       | 1.128104644 | -1.557629368 | 2.169432362 | -0.717989367 | 0.472763843 | NA |             |
| Idi2          | 1.067015601 | -1.557960762 | 1.940976607 | -0.80266849  | 0.422166637 | NA |             |
| Stag3         | 10.44104155 | -1.558549338 | 0.812658593 | -1.917840225 | 0.055131274 |    | 0.091749117 |
| Mdfi          | 41.02905649 | -1.558634422 | 0.474041381 | -3.287971228 | 0.001009122 |    | 0.002542264 |
| Olfir288      | 0.474486995 | -1.559948599 | 3.021587843 | -0.51626783  | 0.605667361 | NA |             |
| Limd2         | 536.2682546 | -1.560095832 | 0.163762401 | -9.52658133  | 1.63E-21    |    | 2.93E-20    |
| Prtn3         | 44.3252326  | -1.560779292 | 0.44801297  | -3.483781486 | 0.000494383 |    | 0.001323115 |
| Slc5a8        | 1.909072414 | -1.561972896 | 1.710810656 | -0.913001618 | 0.361241691 |    | 0.45366102  |
| Dhh           | 7.995117312 | -1.562766101 | 1.015952729 | -1.538227181 | 0.123993077 |    | 0.1854403   |
| Gngt2         | 153.2951373 | -1.563785072 | 0.401941464 | -3.890579126 | 0.000100005 |    | 0.000302393 |
| Gm6831        | 6.055600456 | -1.563798746 | 0.961077219 | -1.627131218 | 0.103709232 |    | 0.159210715 |

|            |             |              |             |              |                |             |
|------------|-------------|--------------|-------------|--------------|----------------|-------------|
| Nrn1l      | 1.961678765 | -1.564264226 | 1.428235219 | -1.09524272  | 0.273410315    | 0.360152916 |
| Fam83g     | 83.57672658 | -1.566815532 | 0.376910385 | -4.156997513 | 3.22E-05       | 0.000105236 |
| Wwvc1      | 2933.850183 | -1.567137382 | 0.272838895 | -5.74381957  | 9.26E-09       | 4.83E-08    |
| Zmat3      | 288.6419703 | -1.567612419 | 0.249662033 | -6.278937965 | 3.41E-10       | 2.09E-09    |
| Rps15a-ps3 | 0.478220799 | -1.567673633 | 3.01691962  | -0.519627246 | 0.603323404 NA |             |
| Dusp7      | 144.2760048 | -1.567829542 | 0.425767586 | -3.682360033 | 0.000231085    | 0.000656479 |
| Brd3os     | 29.3550541  | -1.567972807 | 0.423351751 | -3.703711638 | 0.000212468    | 0.000607743 |
| Gm28455    | 2.216035674 | -1.568400194 | 1.617068201 | -0.969903553 | 0.332094569    | 0.424334795 |
| Tceal8     | 821.8893879 | -1.568556722 | 0.333089422 | -4.709115985 | 2.49E-06       | 9.51E-06    |
| Mdm1       | 53.6300534  | -1.568777686 | 0.399576326 | -3.926102689 | 8.63E-05       | 0.000264097 |
| Celsr1     | 635.0106337 | -1.568827517 | 0.32582343  | -4.814962258 | 1.47E-06       | 5.80E-06    |
| Cystm1     | 489.6927166 | -1.569269899 | 0.286407549 | -5.479149925 | 4.27E-08       | 2.05E-07    |
| Cys1       | 398.59282   | -1.569587157 | 0.372660313 | -4.211844144 | 2.53E-05       | 8.41E-05    |
| St6galnac2 | 43.96250415 | -1.569849032 | 0.528928835 | -2.967977784 | 0.00299766     | 0.00684033  |
| Stk33      | 0.460259639 | -1.570216549 | 3.599361248 | -0.436248668 | 0.662656321 NA |             |
| Fhdc1      | 20.05928956 | -1.570341024 | 0.840395556 | -1.868573689 | 0.061682149    | 0.101247572 |
| Slc52a3    | 30.50561106 | -1.570477839 | 0.536548628 | -2.927000008 | 0.003422489    | 0.00771362  |
| Klrc3      | 1.082538802 | -1.570506761 | 2.181838166 | -0.719809006 | 0.471642599 NA |             |
| Osbpl5     | 95.21176123 | -1.571131017 | 0.35956776  | -4.369499134 | 1.25E-05       | 4.32E-05    |
| Gm28053    | 1.210216593 | -1.57123114  | 1.924375453 | -0.81648887  | 0.414220586 NA |             |
| Creb3l2    | 874.5252351 | -1.571922451 | 0.24746257  | -6.352162483 | 2.12E-10       | 1.34E-09    |
| Gmpr       | 15.715521   | -1.571927985 | 0.597750594 | -2.629738894 | 0.008545047    | 0.017653413 |
| Il27ra     | 32.56715632 | -1.574526041 | 0.468810438 | -3.358555853 | 0.000783509    | 0.002014973 |
| Tyms-ps    | 0.486608247 | -1.57472096  | 3.082961487 | -0.510781911 | 0.609503777 NA |             |
| Herc3      | 240.9358974 | -1.575302441 | 0.263385276 | -5.980981423 | 2.22E-09       | 1.24E-08    |
| Sorbs2     | 3534.19873  | -1.57580356  | 0.251315858 | -6.270211403 | 3.61E-10       | 2.20E-09    |
| Tex26      | 0.483808323 | -1.575980408 | 3.599967678 | -0.437776266 | 0.661548477 NA |             |
| Gm14150    | 0.480008675 | -1.576039225 | 3.600033361 | -0.437784617 | 0.661542423 NA |             |
| Tac4       | 0.480071612 | -1.576199141 | 3.600028025 | -0.437829686 | 0.661509749 NA |             |
| Rell1      | 474.7584489 | -1.576505674 | 0.278185068 | -5.667111054 | 1.45E-08       | 7.37E-08    |
| Dll4       | 123.5792845 | -1.576716767 | 0.337178179 | -4.676212359 | 2.92E-06       | 1.11E-05    |
| Apol10b    | 14.20925659 | -1.577233468 | 0.690015253 | -2.285795077 | 0.02226625     | 0.041368246 |
| Ctla2b     | 41.87569207 | -1.577257861 | 0.537726627 | -2.933196503 | 0.003354915    | 0.007582472 |
| Foxl1      | 1.117990123 | -1.57801619  | 2.058379962 | -0.766630175 | 0.44330143 NA  |             |
| Tmed10-ps  | 0.484809473 | -1.578161749 | 3.599915311 | -0.438388577 | 0.661104626 NA |             |
| Gm11424    | 0.484824306 | -1.578194049 | 3.599914537 | -0.438397643 | 0.661098055 NA |             |
| S100b      | 5.61775185  | -1.579133833 | 1.007117004 | -1.567974552 | 0.116887071    | 0.176469252 |
| Pcdhga2    | 3.849847122 | -1.579319966 | 1.283291626 | -1.230678931 | 0.218442971    | 0.298853685 |
| Trigk      | 6.460336177 | -1.579749275 | 1.012733755 | -1.559886069 | 0.118786807    | 0.178846374 |
| AL607107.2 | 0.482082007 | -1.580526216 | 3.011945076 | -0.524752668 | 0.599755139 NA |             |
| Rpsa-ps10  | 6.428659899 | -1.581139358 | 1.099625355 | -1.437889143 | 0.150465511    | 0.218458187 |
| lqca       | 0.472416905 | -1.581884875 | 2.987965588 | -0.529418706 | 0.596515025 NA |             |
| Sez6l2     | 26.87784847 | -1.582660761 | 0.589706282 | -2.683811938 | 0.007278804    | 0.015263105 |
| Irs2       | 712.1329461 | -1.582748881 | 0.305727654 | -5.176989593 | 2.25E-07       | 9.92E-07    |
| Sh3d21     | 75.33096951 | -1.583204698 | 0.280408143 | -5.646072483 | 1.64E-08       | 8.28E-08    |
| Cep192     | 212.6615454 | -1.583744245 | 0.36236993  | -4.370517838 | 1.24E-05       | 4.31E-05    |
| Zfp9       | 116.2693074 | -1.584699301 | 0.247657599 | -6.398750965 | 1.57E-10       | 1.00E-09    |
| Gm14536    | 0.487689472 | -1.586274324 | 3.599474742 | -0.440696056 | 0.659433052 NA |             |
| Gm15027    | 0.487689472 | -1.586274324 | 3.599474742 | -0.440696056 | 0.659433052 NA |             |
| Msc        | 19.5031001  | -1.587406226 | 0.727111309 | -2.183168116 | 0.029023432    | 0.05224279  |
| Rad51      | 100.2798667 | -1.588309724 | 0.433857088 | -3.660905325 | 0.000251326    | 0.000708667 |
| Sry        | 0.464656264 | -1.588359257 | 3.03190938  | -0.523880848 | 0.600361416 NA |             |
| Gm11989    | 0.492353    | -1.589019521 | 3.076778977 | -0.516455531 | 0.60553629 NA  |             |
| Gm21818    | 0.47336354  | -1.589180612 | 3.037085429 | -0.523258449 | 0.600794412 NA |             |
| B4galt5    | 1070.116266 | -1.589251388 | 0.196011889 | -8.107933618 | 5.15E-16       | 5.78E-15    |
| Rbm24      | 1.027412841 | -1.589422256 | 2.431272946 | -0.653740773 | 0.51327883 NA  |             |
| Slc6a6     | 3919.127834 | -1.589972514 | 0.187448137 | -8.482199607 | 2.21E-17       | 2.83E-16    |
| Pld1       | 525.4493166 | -1.590114919 | 0.264301937 | -6.016281755 | 1.78E-09       | 1.01E-08    |
| Pdgfa      | 272.3553356 | -1.590236264 | 0.344506505 | -4.615983271 | 3.91E-06       | 1.46E-05    |
| Tas2r137   | 0.486992763 | -1.590283862 | 3.00669663  | -0.528913974 | 0.596865128 NA |             |
| Rcsd1      | 214.9483104 | -1.590489527 | 0.25643868  | -6.202221635 | 5.57E-10       | 3.33E-09    |
| Gm6477     | 0.487218842 | -1.590767957 | 3.006450496 | -0.529118294 | 0.596723392 NA |             |
| Il10       | 1.991007051 | -1.591151768 | 1.541950449 | -1.031908495 | 0.302114986    | 0.391937925 |
| Gm6533     | 1.123256398 | -1.591358494 | 1.807627063 | -0.88035775  | 0.378665537 NA |             |
| Plxna1     | 425.0926279 | -1.591603158 | 0.266249224 | -5.977869669 | 2.26E-09       | 1.26E-08    |
| Cplane2    | 5.47831489  | -1.591621042 | 0.940705897 | -1.691943302 | 0.090656785    | 0.142129563 |



|               |             |              |             |              |             |    |             |
|---------------|-------------|--------------|-------------|--------------|-------------|----|-------------|
| Gm6218        | 1.112274179 | -1.591972601 | 2.323670159 | -0.685111264 | 0.493273713 | NA |             |
| Lzts2         | 430.8368586 | -1.592784804 | 0.292179619 | -5.451389153 | 5.00E-08    |    | 2.37E-07    |
| Gm12355       | 0.4881686   | -1.59289475  | 3.005233848 | -0.5300402   | 0.596084059 | NA |             |
| Fbxa39        | 0.476984829 | -1.593308826 | 3.599256985 | -0.442677151 | 0.657999272 | NA |             |
| Fam181b       | 5.720715592 | -1.593313981 | 1.150675661 | -1.384676877 | 0.166151292 |    | 0.237198932 |
| Gsdme         | 58.26923107 | -1.593427854 | 0.40138712  | -3.969803151 | 7.19E-05    |    | 0.000222599 |
| Sec141i       | 425.8149181 | -1.595326674 | 0.174552407 | -9.139528342 | 6.27E-20    |    | 9.91E-19    |
| Gm37240       | 4.598242792 | -1.595914643 | 1.302854888 | -1.224936604 | 0.220599107 |    | 0.301368185 |
| Gm8326        | 0.495046159 | -1.59644391  | 3.073899914 | -0.519354551 | 0.603513519 | NA |             |
| Mtss2         | 91.17615443 | -1.597275135 | 0.34427963  | -4.639470343 | 3.49E-06    |    | 1.31E-05    |
| Rbbp8         | 326.4703492 | -1.597429151 | 0.173802565 | -9.191056246 | 3.89E-20    |    | 6.28E-19    |
| Erv3          | 0.495608708 | -1.597523556 | 3.0732098   | -0.519822485 | 0.603187306 | NA |             |
| Tmem107       | 32.99401842 | -1.59842184  | 0.446001484 | -3.583893543 | 0.00033851  |    | 0.000931094 |
| Gm7867        | 0.474693666 | -1.598465484 | 3.598961828 | -0.444146273 | 0.656936833 | NA |             |
| Gm4968        | 0.502069566 | -1.598630302 | 2.630589756 | -0.607707948 | 0.543381191 | NA |             |
| Gm6069        | 0.46957912  | -1.598861086 | 3.02536036  | -0.528486162 | 0.597161949 | NA |             |
| Gm10232       | 0.492481905 | -1.599134975 | 3.598981123 | -0.444329915 | 0.656804076 | NA |             |
| Gm8165        | 0.492481905 | -1.599134975 | 3.598981123 | -0.444329915 | 0.656804076 | NA |             |
| Il12a         | 0.492481905 | -1.599134975 | 3.598981123 | -0.444329915 | 0.656804076 | NA |             |
| BC061237      | 0.492481905 | -1.599134975 | 3.598981123 | -0.444329915 | 0.656804076 | NA |             |
| Fam43b        | 0.492481905 | -1.599134975 | 3.598981123 | -0.444329915 | 0.656804076 | NA |             |
| Gm2427        | 0.492481905 | -1.599134975 | 3.598981123 | -0.444329915 | 0.656804076 | NA |             |
| Mas1          | 11.47673957 | -1.599418555 | 1.140603375 | -1.402256551 | 0.16083865  |    | 0.2308256   |
| Rbmx2         | 47.22022831 | -1.599963943 | 0.376324991 | -4.251548475 | 2.12E-05    |    | 7.13E-05    |
| Zswim9        | 141.5068231 | -1.600903163 | 0.243886736 | -6.564125595 | 5.23E-11    |    | 3.54E-10    |
| Gm30285       | 1.119829262 | -1.601131685 | 1.94343769  | -0.823865717 | 0.410015862 | NA |             |
| Mall          | 1.959523254 | -1.602237193 | 1.574316271 | -1.017735269 | 0.308803782 |    | 0.399460268 |
| Slc39a12      | 1.857563769 | -1.60232761  | 1.653425569 | -0.9690957   | 0.332497443 |    | 0.424706251 |
| Cklf          | 52.56829546 | -1.60318144  | 0.459785444 | -3.486803379 | 0.000488831 |    | 0.001309694 |
| Tbc1d4        | 154.7528869 | -1.603264577 | 0.349554121 | -4.586598987 | 4.51E-06    |    | 1.67E-05    |
| Nol3          | 66.98284779 | -1.603405775 | 0.38622511  | -4.151479887 | 3.30E-05    |    | 0.000107656 |
| Plac8         | 209.1130528 | -1.604265528 | 0.295863876 | -5.422309578 | 5.88E-08    |    | 2.77E-07    |
| Pask          | 62.73159307 | -1.604335459 | 0.451439038 | -3.553825265 | 0.000379671 |    | 0.001036949 |
| Rbms3         | 136.7247707 | -1.604401291 | 0.263636457 | -6.085657924 | 1.16E-09    |    | 6.71E-09    |
| Il22ra1       | 59.97071623 | -1.604798332 | 0.404338814 | -3.968944549 | 7.22E-05    |    | 0.000223281 |
| Map4k3        | 1259.612647 | -1.604802989 | 0.244614683 | -6.560534189 | 5.36E-11    |    | 3.62E-10    |
| Ube2t         | 43.07945225 | -1.604828506 | 0.508651513 | -3.155064843 | 0.001604624 |    | 0.003876383 |
| Gm10481       | 2.014347482 | -1.604879424 | 1.70553524  | -0.940982858 | 0.346713644 |    | 0.43910455  |
| Ctc1          | 346.2762846 | -1.605952852 | 0.218351462 | -7.354898558 | 1.91E-13    |    | 1.68E-12    |
| Hk3           | 88.17381917 | -1.606019327 | 0.500030503 | -3.211842715 | 0.001318866 |    | 0.003250532 |
| Tro           | 4.820202293 | -1.606085228 | 1.17614504  | -1.365550313 | 0.172080151 |    | 0.244427797 |
| Gm14567       | 1.869163918 | -1.606335985 | 2.030576184 | -0.791073981 | 0.428900821 |    | 0.520757583 |
| Tdpoz8        | 0.493990381 | -1.606960887 | 2.99863481  | -0.535897496 | 0.592029395 | NA |             |
| Cabp4         | 4.437332658 | -1.607050902 | 1.010486869 | -1.590372869 | 0.111750782 |    | 0.169842858 |
| Camk1         | 647.503864  | -1.607806987 | 0.228758016 | -7.028418137 | 2.09E-12    |    | 1.65E-11    |
| Trip13        | 36.46570955 | -1.607976822 | 0.591014108 | -2.720708017 | 0.006514227 |    | 0.013802454 |
| Hs3st3a1      | 15.54676578 | -1.608213102 | 0.834601144 | -1.926924055 | 0.053989095 |    | 0.090156342 |
| Chka          | 2663.707121 | -1.608226396 | 0.239162203 | -6.724417062 | 1.76E-11    |    | 1.25E-10    |
| 5033423K11Rik | 1.124611207 | -1.60896382  | 2.016141331 | -0.798041187 | 0.42484659  | NA |             |
| Spata48       | 0.496651013 | -1.609964159 | 3.598507926 | -0.447397697 | 0.654587938 | NA |             |
| Il1rl1        | 9.280064877 | -1.610022982 | 0.796994695 | -2.020117564 | 0.043371194 |    | 0.074543011 |
| Lancl3        | 2.198169186 | -1.61024316  | 1.37774122  | -1.168755886 | 0.242501999 |    | 0.326227633 |
| Sla2          | 4.45736779  | -1.611743707 | 0.995137686 | -1.619618803 | 0.105314188 |    | 0.161268283 |
| Gm8835        | 0.497474128 | -1.61213305  | 3.598410057 | -0.448012601 | 0.654144102 | NA |             |
| Frrs1         | 1313.403955 | -1.613584954 | 0.195318824 | -8.261287491 | 1.44E-16    |    | 1.70E-15    |
| Arhgap8       | 11.28194432 | -1.613818227 | 1.001446748 | -1.611486812 | 0.107073659 |    | 0.163536261 |
| Zc3h12b       | 3.911399455 | -1.614142042 | 1.303488815 | -1.238324428 | 0.21559579  |    | 0.295503861 |
| Lat           | 27.98584949 | -1.614762661 | 0.471006407 | -3.428324194 | 0.00060732  |    | 0.001597283 |
| Snaip         | 12.4048577  | -1.614842785 | 0.644591042 | -2.505220645 | 0.012237503 |    | 0.02429544  |
| Wnt5a         | 75.29400753 | -1.614889729 | 0.502585343 | -3.213165189 | 0.001312808 |    | 0.003237486 |
| Trbv17        | 0.499038343 | -1.615135481 | 3.598264121 | -0.448865182 | 0.653528914 | NA |             |
| Ccne1         | 53.45000804 | -1.615393002 | 0.527009916 | -3.065204188 | 0.002175214 |    | 0.005112084 |
| Gm13040       | 0.499242738 | -1.615568759 | 3.598254161 | -0.448986838 | 0.653441151 | NA |             |
| Nap1l1        | 1747.645333 | -1.6164319   | 0.249717907 | -6.473031577 | 9.61E-11    |    | 6.29E-10    |
| H2-DMb2       | 29.08883471 | -1.617081998 | 0.470556004 | -3.436534618 | 0.000589207 |    | 0.001554923 |
| Dnah5         | 23.52047625 | -1.617174767 | 0.617309208 | -2.61971593  | 0.008800304 |    | 0.0180996   |

|               |             |              |             |              |                |             |
|---------------|-------------|--------------|-------------|--------------|----------------|-------------|
| Lacc1         | 458.4215967 | -1.617306485 | 0.304610884 | -5.309417909 | 1.10E-07       | 5.03E-07    |
| Dynl1         | 876.0124412 | -1.617730865 | 0.21213897  | -7.625807104 | 2.43E-14       | 2.32E-13    |
| Gm11874       | 1.106312188 | -1.618061017 | 2.206511936 | -0.733311699 | 0.463368341 NA |             |
| Has3          | 5.534403247 | -1.618127236 | 1.119527867 | -1.445365751 | 0.148355178    | 0.215780145 |
| Tmem268       | 256.6113205 | -1.61817051  | 0.262633978 | -6.16131439  | 7.21E-10       | 4.26E-09    |
| Cited4        | 24.70522491 | -1.618523281 | 0.711715856 | -2.274114404 | 0.022959109    | 0.042521118 |
| Spopfm2       | 0.477982203 | -1.619680226 | 3.014815453 | -0.537240256 | 0.591101668 NA |             |
| Gsdma         | 0.478025279 | -1.619821255 | 3.014766862 | -0.537295695 | 0.591063379 NA |             |
| Ighv2-6       | 0.500614897 | -1.619951132 | 3.59806189  | -0.450228812 | 0.652545463 NA |             |
| 9830107B12Rik | 0.478069715 | -1.61996668  | 3.014716745 | -0.537352865 | 0.591023895 NA |             |
| Kbtbd11       | 49.09496568 | -1.620564001 | 0.37974055  | -4.267555835 | 1.98E-05       | 6.66E-05    |
| Agrtrap       | 101.960701  | -1.620564596 | 0.26659796  | -6.078683407 | 1.21E-09       | 6.99E-09    |
| Gm17230       | 1.123899039 | -1.621435403 | 1.943193657 | -0.834417813 | 0.404045583 NA |             |
| Nobox         | 1.621502578 | -1.621569965 | 1.608355085 | -1.008216395 | 0.313350589 NA |             |
| Casc4         | 261.9932636 | -1.622444274 | 0.286088197 | -5.671133216 | 1.42E-08       | 7.20E-08    |
| Cpne7         | 6.95850532  | -1.622992849 | 0.894360539 | -1.814696398 | 0.069570579    | 0.112538118 |
| Adrb1         | 13.22854031 | -1.623006529 | 0.650176358 | -2.496255837 | 0.012551204    | 0.024851309 |
| Ldlrad3       | 374.6636372 | -1.623042662 | 0.184649137 | -8.789874064 | 1.50E-18       | 2.11E-17    |
| Dact3         | 28.44942043 | -1.624050009 | 0.424139977 | -3.829042526 | 0.000128643    | 0.000381475 |
| Gm42420       | 4.30253679  | -1.624280982 | 3.419797192 | -0.474964125 | 0.634812544    | 0.712728968 |
| Aldh3b3       | 1.931048223 | -1.624686547 | 1.625660544 | -0.999400861 | 0.317600543    | 0.409109129 |
| Pkp3          | 85.07703957 | -1.624749144 | 0.405429717 | -4.007474231 | 6.14E-05       | 0.000191728 |
| Cdk6          | 1188.387791 | -1.625449012 | 0.276489356 | -5.878884583 | 4.13E-09       | 2.24E-08    |
| Artn          | 1.707920465 | -1.626173467 | 2.051944542 | -0.792503615 | 0.428067085    | 0.519988907 |
| Adamdec1      | 36.61618733 | -1.626347651 | 0.604549853 | -2.690179547 | 0.007141359    | 0.015011822 |
| 1700037C18Rik | 26.01853888 | -1.626425829 | 0.475998281 | -3.416873323 | 0.000633447    | 0.001661387 |
| Gm8115        | 0.50812844  | -1.62816352  | 3.059520655 | -0.532162944 | 0.594613145 NA |             |
| Klhl29        | 9.912361421 | -1.628201606 | 0.837281698 | -1.944628206 | 0.051819742    | 0.087079641 |
| Slc16a14      | 0.508233509 | -1.628393417 | 3.059411219 | -0.532257124 | 0.594547924 NA |             |
| Tnfaip2       | 1174.747047 | -1.628719816 | 0.220274282 | -7.394053468 | 1.42E-13       | 1.27E-12    |
| Tsnaxip1      | 0.487210042 | -1.629382058 | 3.597665396 | -0.452899833 | 0.650620871 NA |             |
| Mafa          | 0.487197073 | -1.629382126 | 3.597661778 | -0.452900308 | 0.650620529 NA |             |
| Gm18584       | 0.487268296 | -1.629384178 | 3.597681287 | -0.452898422 | 0.650621887 NA |             |
| Rab39         | 9.830546529 | -1.629617512 | 0.726415224 | -2.243369162 | 0.024873019    | 0.045595185 |
| Gm37098       | 0.509127742 | -1.630584983 | 3.058450257 | -0.53314092  | 0.593936035 NA |             |
| Endod1        | 164.3932092 | -1.630814574 | 0.230954902 | -7.061181891 | 1.65E-12       | 1.32E-11    |
| Mybph         | 0.501397126 | -1.630849133 | 3.597601423 | -0.453315679 | 0.650321444 NA |             |
| Gm12186       | 0.509636431 | -1.631469592 | 3.057854223 | -0.53353413  | 0.593663892 NA |             |
| Gm17771       | 0.50169064  | -1.631566301 | 3.59757871  | -0.453517889 | 0.650175865 NA |             |
| Cracr2a       | 18.62655404 | -1.63271332  | 0.523058829 | -3.121471675 | 0.001799496    | 0.004294205 |
| Gm5781        | 0.475892302 | -1.63278223  | 3.597588936 | -0.453854584 | 0.649933494 NA |             |
| Spindoc       | 147.963878  | -1.633295124 | 0.283554105 | -5.760082805 | 8.41E-09       | 4.39E-08    |
| Olfr1372-ps1  | 239.359191  | -1.633438129 | 0.418297858 | -3.904964126 | 9.42E-05       | 0.000286329 |
| Ccdc116       | 9.349251024 | -1.633806556 | 0.795695461 | -2.053306367 | 0.040042874    | 0.069502231 |
| Fzd1          | 255.8151864 | -1.634608383 | 0.383845492 | -4.258506137 | 2.06E-05       | 6.92E-05    |
| Ccdc126       | 43.05597544 | -1.635053726 | 0.364053659 | -4.49124377  | 7.08E-06       | 2.56E-05    |
| Ccdc89        | 1.14464308  | -1.635299688 | 2.255625456 | -0.724987246 | 0.468459855 NA |             |
| Caly          | 0.508539558 | -1.635463541 | 2.984573473 | -0.547972283 | 0.583710934 NA |             |
| Fzd5          | 344.2106062 | -1.636461595 | 0.283087812 | -5.780756094 | 7.44E-09       | 3.91E-08    |
| Gm44126       | 32.48374755 | -1.637300537 | 0.491617643 | -3.330434863 | 0.000867104    | 0.002216916 |
| Rassf1        | 373.080545  | -1.638152948 | 0.203242958 | -8.060072341 | 7.62E-16       | 8.46E-15    |
| Zglp1         | 2.981337631 | -1.638258551 | 1.459575528 | -1.122421224 | 0.261683384    | 0.347015155 |
|               | 3-Mar       |              |             |              |                |             |
|               | 35.6438316  | -1.638709876 | 0.488821184 | -3.352370827 | 0.000801226    | 0.002056814 |
| Heph          | 28.60000343 | -1.639471387 | 0.42131146  | -3.89135246  | 9.97E-05       | 0.000301537 |
| Kctd10        | 447.4569549 | -1.639474134 | 0.18451238  | -8.885442427 | 6.37E-19       | 9.26E-18    |
| Rab11fip4     | 405.7701425 | -1.640186685 | 0.284904121 | -5.756977741 | 8.56E-09       | 4.47E-08    |
| Lypd6         | 7.759486458 | -1.640789451 | 0.874884174 | -1.8754362   | 0.060732739    | 0.099900785 |
| Olfr1161      | 0.492767101 | -1.641034946 | 2.96399583  | -0.553656294 | 0.579814092 NA |             |
| Hcn3          | 8.612899806 | -1.64107469  | 1.050792851 | -1.561749006 | 0.118347129    | 0.178310372 |
| Iqsec1        | 1133.989488 | -1.641129064 | 0.198579641 | -8.264336948 | 1.40E-16       | 1.66E-15    |
| H1f11-ps      | 0.493214961 | -1.641763818 | 2.963500997 | -0.553994691 | 0.579582479 NA |             |
| Plekha7       | 464.015346  | -1.641961428 | 0.222361613 | -7.384194616 | 1.53E-13       | 1.36E-12    |
| Cbx5          | 1297.65871  | -1.642040578 | 0.2468563   | -6.651807466 | 2.90E-11       | 2.01E-10    |
| Fen1          | 190.0933828 | -1.642314758 | 0.325779254 | -5.041188905 | 4.63E-07       | 1.95E-06    |
| Csn3          | 3.066609372 | -1.64238129  | 1.150519479 | -1.427512807 | 0.153432136    | 0.222084485 |
| Ear2          | 26.29128219 | -1.642512823 | 0.701109165 | -2.342734776 | 0.019142986    | 0.036152611 |



|            |             |              |             |              |             |             |
|------------|-------------|--------------|-------------|--------------|-------------|-------------|
| Gm10521    | 11.80979959 | -1.643995825 | 0.68907352  | -2.385806127 | 0.017041732 | 0.032584954 |
| Emilin1    | 529.4824655 | -1.644881045 | 0.300234063 | -5.478662307 | 4.29E-08    | 2.05E-07    |
| Vopp1      | 90.89275822 | -1.644927653 | 0.293537796 | -5.603801872 | 2.10E-08    | 1.05E-07    |
| Cntnap4    | 1.12150043  | -1.645031419 | 2.17574002  | -0.756079037 | 0.44960181  | NA          |
| Fam170b    | 0.515338031 | -1.645248317 | 3.051876015 | -0.539094088 | 0.589821935 | NA          |
| Igkj1      | 0.688451996 | -1.64537534  | 2.45284507  | -0.6708028   | 0.502346164 | NA          |
| Tonsl      | 96.28548686 | -1.645536921 | 0.534618283 | -3.077966041 | 0.002084187 | 0.004909661 |
| Mbd4       | 65.02910374 | -1.6456784   | 0.384762291 | -4.277130167 | 1.89E-05    | 6.40E-05    |
| Ms4a8a     | 13.820338   | -1.645721818 | 0.655172756 | -2.511889886 | 0.012008655 | 0.023893972 |
| Prr29      | 1.273589976 | -1.645814965 | 1.914487201 | -0.859663603 | 0.389974504 | NA          |
| Rgs9bp     | 12.1528303  | -1.646249821 | 0.680954267 | -2.417562972 | 0.01562483  | 0.030207769 |
| Gimd1      | 86.14298975 | -1.646277987 | 0.335357028 | -4.909030827 | 9.15E-07    | 3.71E-06    |
| Gria3      | 64.21279524 | -1.648790256 | 0.474925321 | -3.471683198 | 0.000517206 | 0.001377708 |
| Slc1a5     | 178.0610241 | -1.649713255 | 0.27539692  | -5.990311202 | 2.09E-09    | 1.17E-08    |
| Olfr732    | 0.496293383 | -1.649771159 | 2.960081854 | -0.557339709 | 0.57729535  | NA          |
| Scgn       | 0.512260342 | -1.649810119 | 3.596711309 | -0.458699622 | 0.646449885 | NA          |
| Gm8494     | 0.512293439 | -1.650293245 | 3.596753001 | -0.458828628 | 0.646357235 | NA          |
| Il23a      | 9.310777056 | -1.650516079 | 0.778694449 | -2.119593996 | 0.034040299 | 0.060161624 |
| Rtkn       | 681.0722876 | -1.652233669 | 0.261121269 | -6.327457255 | 2.49E-10    | 1.56E-09    |
| P3h3       | 109.9415674 | -1.652244532 | 0.296762171 | -5.567571251 | 2.58E-08    | 1.27E-07    |
| Jag2       | 45.29911242 | -1.652690897 | 0.672778019 | -2.456517383 | 0.014029101 | 0.027414961 |
| Mir100hg   | 41.00653714 | -1.652848524 | 0.424859694 | -3.890339677 | 0.000100104 | 0.000302584 |
| Atp2a1     | 2.858734124 | -1.65285742  | 1.55432187  | -1.063394559 | 0.287603059 | 0.376289866 |
| Tent5a     | 333.9725645 | -1.652935352 | 0.295212665 | -5.59913428  | 2.15E-08    | 1.07E-07    |
| Synj2      | 334.1958062 | -1.653567966 | 0.315815563 | -5.235865991 | 1.64E-07    | 7.37E-07    |
| Auts2      | 45.94326506 | -1.653605671 | 0.488652356 | -3.384012477 | 0.000714348 | 0.001851353 |
| Rhob       | 1101.1411   | -1.653884427 | 0.179491392 | -9.214282683 | 3.13E-20    | 5.09E-19    |
| Dlx4       | 14.42015046 | -1.654322776 | 0.71334327  | -2.319111772 | 0.020388977 | 0.038238864 |
| Xrra1      | 5.990402301 | -1.65507747  | 1.113838545 | -1.485922244 | 0.137299689 | 0.201922455 |
| Smpdl3b    | 20.22000113 | -1.655910234 | 0.703669143 | -2.353251171 | 0.018610059 | 0.035243755 |
| Zfp813-ps  | 3.363303562 | -1.655942314 | 1.233627315 | -1.342335966 | 0.179487087 | 0.253365559 |
| Adora3     | 13.73960188 | -1.656231596 | 0.595224768 | -2.782531383 | 0.005393665 | 0.011651191 |
| Ankrd6     | 53.42893727 | -1.656456276 | 0.483431584 | -3.426454397 | 0.000611516 | 0.001607576 |
| Gm10357    | 0.493747806 | -1.656555765 | 2.99594459  | -0.552932711 | 0.580309487 | NA          |
| Naip6      | 60.67063743 | -1.657146161 | 0.380263469 | -4.357889453 | 1.31E-05    | 4.54E-05    |
| lqsec3     | 0.499947909 | -1.657413492 | 2.955771037 | -0.560738119 | 0.574976077 | NA          |
| RspH9      | 29.02513331 | -1.657478568 | 0.501713883 | -3.303633054 | 0.000954407 | 0.002417641 |
| Klrb1c     | 12.29751122 | -1.658101556 | 0.699571178 | -2.370168481 | 0.017779981 | 0.033867387 |
| Pnmal2     | 5.245034765 | -1.658566046 | 1.044760834 | -1.58750787  | 0.112397666 | 0.170719477 |
| Sell       | 44.23815843 | -1.658720185 | 0.417560788 | -3.972404093 | 7.12E-05    | 0.000220262 |
| Dgkg       | 3.178068464 | -1.658804686 | 1.234862838 | -1.34331088  | 0.179171331 | 0.253024589 |
| Rtkn2      | 5.992849669 | -1.658863977 | 1.253181041 | -1.323722529 | 0.185595214 | 0.260622549 |
| Mutyh      | 23.86754259 | -1.658968761 | 0.57541218  | -2.883096362 | 0.00393787  | 0.008753788 |
| Mob3a      | 198.7786721 | -1.658991787 | 0.233069195 | -7.118022553 | 1.09E-12    | 8.91E-12    |
| Trim44     | 2419.585201 | -1.659784383 | 0.211413741 | -7.850882252 | 4.13E-15    | 4.28E-14    |
| Gm48690    | 0.521248879 | -1.659904087 | 3.045962572 | -0.544952227 | 0.585786375 | NA          |
| Snx22      | 8.419453879 | -1.660007158 | 0.842692079 | -1.969885797 | 0.048851461 | 0.082760578 |
| Armcx2     | 71.60544489 | -1.660261367 | 0.345143787 | -4.810346961 | 1.51E-06    | 5.92E-06    |
| Kcnrg      | 1.135672707 | -1.660324634 | 1.971529603 | -0.842150496 | 0.399703719 | NA          |
| Nup210l    | 6.422119968 | -1.660549687 | 0.885465562 | -1.87534079  | 0.060745855 | 0.099909561 |
| Caacna1c   | 19.8333841  | -1.660627915 | 0.674993076 | -2.460214742 | 0.013885391 | 0.027159034 |
| Ubcqln2    | 757.195211  | -1.660872094 | 0.358932139 | -4.627259339 | 3.71E-06    | 1.39E-05    |
| Zdhhc23    | 3.017692794 | -1.661283262 | 1.282323488 | -1.295525877 | 0.19513888  | 0.271702682 |
| Msi1       | 10.50713608 | -1.662685828 | 0.953669213 | -1.743461785 | 0.081252984 | 0.128975873 |
| Lmx1a      | 0.517228652 | -1.662855443 | 3.596214022 | -0.462390568 | 0.643801262 | NA          |
| Vmn2r46    | 0.517228652 | -1.662855443 | 3.596214022 | -0.462390568 | 0.643801262 | NA          |
| Zfp361-ps  | 0.517228652 | -1.662855443 | 3.596214022 | -0.462390568 | 0.643801262 | NA          |
| Fbxo10     | 46.4493503  | -1.663428514 | 0.484246393 | -3.435087053 | 0.000592364 | 0.001562136 |
| Gm20509    | 0.501701925 | -1.664717129 | 3.596158336 | -0.462915415 | 0.643424998 | NA          |
| Impdh1     | 150.7097066 | -1.66515217  | 0.29089999  | -5.724139665 | 1.04E-08    | 5.39E-08    |
| Pcdhb6     | 1.151203456 | -1.666710156 | 1.948862539 | -0.855222019 | 0.392428248 | NA          |
| Misp3      | 7.139777078 | -1.667100178 | 0.892470434 | -1.86796124  | 0.061767474 | 0.101368107 |
| Dnmt3c     | 0.519335274 | -1.667730811 | 3.596009722 | -0.463772609 | 0.64281067  | NA          |
| Angptl1    | 4.850835636 | -1.667987891 | 1.099718406 | -1.516740906 | 0.129332112 | 0.192110643 |
| Oas2       | 219.8692504 | -1.66815982  | 0.37745508  | -4.419492299 | 9.89E-06    | 3.50E-05    |
| Igkv11-125 | 0.519617219 | -1.668305574 | 3.59599731  | -0.463934044 | 0.642695001 | NA          |

|            |             |              |             |              |                |             |
|------------|-------------|--------------|-------------|--------------|----------------|-------------|
| Lpar1      | 33.33694981 | -1.668773979 | 0.547050818 | -3.050491697 | 0.00228467     | 0.005339876 |
| Cpeb1      | 243.5494757 | -1.669797535 | 0.235186281 | -7.099893453 | 1.25E-12       | 1.01E-11    |
| Clmp       | 87.22186137 | -1.670207414 | 0.390851152 | -4.273256983 | 1.93E-05       | 6.51E-05    |
| Gm2420     | 1.254068896 | -1.670253542 | 2.198239073 | -0.759814327 | 0.447365578 NA |             |
| Gm8784     | 0.525807486 | -1.670637787 | 3.041307127 | -0.549315711 | 0.582788807 NA |             |
| Gm12844    | 0.502577991 | -1.671039124 | 2.517266472 | -0.663830843 | 0.506798583 NA |             |
| Pdgfc      | 234.2798124 | -1.671100264 | 0.227759689 | -7.337120417 | 2.18E-13       | 1.91E-12    |
| Jcad       | 224.0402816 | -1.671162612 | 0.202412933 | -8.256204713 | 1.50E-16       | 1.77E-15    |
| Flot1      | 1074.270876 | -1.671756367 | 0.218721288 | -7.643318031 | 2.12E-14       | 2.04E-13    |
| Gm2367     | 0.52680313  | -1.672851158 | 3.040313493 | -0.550223246 | 0.582166262 NA |             |
| Adrg4      | 1.14912385  | -1.672853502 | 1.92414526  | -0.869400838 | 0.384627925 NA |             |
| Gm13444    | 0.521617641 | -1.673011131 | 3.595776726 | -0.465271188 | 0.641737265 NA |             |
| Ptp4a3     | 310.9534213 | -1.673029446 | 0.244147478 | -6.852536261 | 7.26E-12       | 5.39E-11    |
| Apc-ps1    | 1.218979694 | -1.673080242 | 1.936715875 | -0.863874905 | 0.387656614 NA |             |
| Hpse       | 86.01374069 | -1.674855834 | 0.35202084  | -4.757831477 | 1.96E-06       | 7.57E-06    |
| Lrfrn4     | 17.36959709 | -1.675331412 | 0.517372339 | -3.238154201 | 0.001203058    | 0.002988449 |
| Gm7993     | 1.169461729 | -1.675431734 | 1.744558575 | -0.960375741 | 0.336866143 NA |             |
| Klfr5c     | 9.807388094 | -1.676036169 | 0.947054628 | -1.769735472 | 0.0767712328   | 0.122718774 |
| Npb        | 28.80782722 | -1.677106489 | 0.574751915 | -2.9179659   | 0.003523229    | 0.007913571 |
| Cpne8      | 417.1432757 | -1.677224779 | 0.189326427 | -8.858904722 | 8.08E-19       | 1.17E-17    |
| Jam3       | 30.06439816 | -1.677941374 | 0.436311262 | -3.845743897 | 0.000120187    | 0.000358021 |
| Tacc2      | 1108.140404 | -1.678161211 | 0.240001192 | -6.992303658 | 2.70E-12       | 2.10E-11    |
| Ly6a       | 301.8231507 | -1.678566769 | 0.390913909 | -4.293955091 | 1.76E-05       | 5.96E-05    |
| Ctnnal1    | 242.2915218 | -1.678588018 | 0.278396464 | -6.029487566 | 1.64E-09       | 9.31E-09    |
| Gm17922    | 0.508984275 | -1.678609994 | 2.946041797 | -0.569784835 | 0.568823642 NA |             |
| Olfr569    | 0.508887578 | -1.678667174 | 2.946137208 | -0.56978581  | 0.568822981 NA |             |
| Rps12-ps19 | 0.509305388 | -1.678880916 | 2.945712086 | -0.569940601 | 0.568717986 NA |             |
| Gm15772    | 1.169988392 | -1.679224803 | 2.275171567 | -0.738065132 | 0.460474871 NA |             |
| Gm3712     | 0.49465787  | -1.67948714  | 3.595522642 | -0.467105149 | 0.640424651 NA |             |
| Fam163b    | 1.167294186 | -1.680023891 | 2.723146526 | -0.616942157 | 0.537272879 NA |             |
| Sorcs2     | 8.644254389 | -1.680420505 | 0.788471811 | -2.131237265 | 0.0330696      | 0.058677201 |
| Prr7       | 5.769748269 | -1.68053132  | 0.921077307 | -1.824527982 | 0.06807229     | 0.110471827 |
| Amotl2     | 2033.228867 | -1.680587739 | 0.290346293 | -5.788218338 | 7.11E-09       | 3.75E-08    |
| Dbndd2     | 264.8723937 | -1.6806834   | 0.29024942  | -5.79047978  | 7.02E-09       | 3.70E-08    |
| Clvs1      | 0.524471283 | -1.680885297 | 3.595452184 | -0.467503171 | 0.640139924 NA |             |
| Gm6392     | 0.524531774 | -1.681036676 | 3.59544568  | -0.467546143 | 0.640109187 NA |             |
| Ccdc3      | 44.47699834 | -1.682320611 | 0.392916762 | -4.281620879 | 1.86E-05       | 6.28E-05    |
| Mtmr12     | 382.6834564 | -1.682362643 | 0.268879895 | -6.256929863 | 3.93E-10       | 2.39E-09    |
| Igkv1-115  | 0.500014581 | -1.682736223 | 3.595451546 | -0.46801805  | 0.639771682 NA |             |
| Gm48432    | 1.174192831 | -1.683105689 | 1.902736903 | -0.884570897 | 0.376388109 NA |             |
| Cyp4f16    | 227.1527747 | -1.683417421 | 0.240461556 | -7.000775704 | 2.55E-12       | 1.99E-11    |
| Gm8493     | 3.978588313 | -1.683465684 | 1.259704702 | -1.336397079 | 0.181419521    | 0.255606661 |
| Gm35931    | 0.517536189 | -1.684236556 | 3.015116717 | -0.558597465 | 0.57643647 NA  |             |
| Zfp704     | 443.5256312 | -1.684517943 | 0.233251135 | -7.221906748 | 5.13E-13       | 4.31E-12    |
| Plb1       | 1.393752246 | -1.684586064 | 1.653156363 | -1.019011935 | 0.308197301 NA |             |
| Crtam      | 2.166069431 | -1.684834024 | 1.410706392 | -1.194319409 | 0.232353048    | 0.314927235 |
| Tnfrsf25   | 15.85499929 | -1.684964493 | 0.712683225 | -2.364254458 | 0.018066399    | 0.034340057 |
| Mageb16    | 1.209508785 | -1.687027237 | 2.568964871 | -0.656695331 | 0.511376837 NA |             |
| Cdh9       | 0.516564158 | -1.688188716 | 2.508677136 | -0.67293981  | 0.500985584 NA |             |
| Piezo1     | 367.5395182 | -1.688509626 | 0.27295383  | -6.186063129 | 6.17E-10       | 3.67E-09    |
| Zfp7       | 175.2917801 | -1.688823516 | 0.231267487 | -7.302468389 | 2.83E-13       | 2.44E-12    |
| Scrn1      | 10.06690683 | -1.689116942 | 0.91741678  | -1.84116639  | 0.065597179    | 0.106827125 |
| Col5a1     | 395.5143493 | -1.694240778 | 0.283245173 | -5.981534517 | 2.21E-09       | 1.23E-08    |
| Ctdspl     | 272.9657577 | -1.69467722  | 0.223371897 | -7.58679693  | 3.28E-14       | 3.12E-13    |
| Pde1b      | 85.39048974 | -1.694923989 | 0.373790303 | -4.534424719 | 5.78E-06       | 2.11E-05    |
| Plekha1    | 581.2514082 | -1.695964293 | 0.195270679 | -8.685196874 | 3.78E-18       | 5.16E-17    |
| Sh3tc2     | 25.08304946 | -1.696864313 | 0.54733938  | -3.100205057 | 0.001933867    | 0.004583424 |
| Il19       | 0.523446699 | -1.697494768 | 3.009051515 | -0.564129514 | 0.572665993 NA |             |
| Prkch      | 99.44899981 | -1.697638773 | 0.270550534 | -6.274756689 | 3.50E-10       | 2.14E-09    |
| Sod3       | 878.1220239 | -1.698113239 | 0.349196058 | -4.862922132 | 1.16E-06       | 4.63E-06    |
| Ttll7      | 20.80273672 | -1.698269197 | 0.54670658  | -3.106363192 | 0.001894039    | 0.00450029  |
| Gm5581     | 0.516048642 | -1.698635733 | 2.508102419 | -0.677259318 | 0.498241438 NA |             |
| Fam171a2   | 49.02440318 | -1.698847654 | 0.414911733 | -4.094479671 | 4.23E-05       | 0.000135742 |
| Ccl19      | 16.20241326 | -1.699240062 | 0.54011023  | -3.146098645 | 0.001654642    | 0.003987044 |
| AC132444.2 | 0.52191625  | -1.69927582  | 2.505640896 | -0.678180111 | 0.497657502 NA |             |
| AC132444.4 | 0.52191625  | -1.69927582  | 2.505640896 | -0.678180111 | 0.497657502 NA |             |

|            |             |              |             |              |             |    |             |
|------------|-------------|--------------|-------------|--------------|-------------|----|-------------|
| AC133103.6 | 0.52191625  | -1.69927582  | 2.505640896 | -0.678180111 | 0.497657502 | NA |             |
| Tns3       | 1137.174771 | -1.699885126 | 0.153004771 | -11.11001382 | 1.12E-28    |    | 3.50E-27    |
| Gm17999    | 0.52472748  | -1.701491095 | 3.007939184 | -0.565666721 | 0.571620362 | NA |             |
| Pycr1      | 43.01718568 | -1.701995313 | 0.577268571 | -2.948359563 | 0.003194653 |    | 0.007253921 |
| Ranbp17    | 26.39180353 | -1.702030884 | 0.581890344 | -2.925002796 | 0.003444531 |    | 0.007754175 |
| Adgb       | 40.66286808 | -1.70226966  | 0.446913697 | -3.808944928 | 0.000139561 |    | 0.000411936 |
| Socs3      | 764.6478791 | -1.702328484 | 0.442080323 | -3.850722136 | 0.00011777  |    | 0.000351373 |
| Myadm      | 1489.142236 | -1.702328535 | 0.197247125 | -8.630435205 | 6.11E-18    |    | 8.21E-17    |
| Taar1      | 0.519358873 | -1.702571045 | 2.935109034 | -0.5800708   | 0.561866874 | NA |             |
| Arl10      | 70.11414904 | -1.703712912 | 0.290835614 | -5.857992726 | 4.68E-09    |    | 2.52E-08    |
| Naip3      | 1.207665915 | -1.703881937 | 1.818244546 | -0.937102735 | 0.348705715 | NA |             |
| Pwwp2b     | 122.98509   | -1.703947885 | 0.30798352  | -5.532594357 | 3.16E-08    |    | 1.54E-07    |
| Trem1      | 4.569932806 | -1.7043598   | 1.151088091 | -1.480651058 | 0.138699582 |    | 0.203664985 |
| Gab3       | 11.93982836 | -1.704527186 | 0.686196765 | -2.484021019 | 0.012990814 |    | 0.025591333 |
| Odc1       | 2508.097643 | -1.704582291 | 0.26666662  | -6.392184707 | 1.64E-10    |    | 1.04E-09    |
| Hmgn3      | 43.85702985 | -1.704624982 | 0.49621236  | -3.435273117 | 0.000591957 |    | 0.001561938 |
| Smim24     | 28.03986447 | -1.704926795 | 0.49813651  | -3.422609586 | 0.000620231 |    | 0.001628727 |
| Tmprs7     | 7.44882036  | -1.705701309 | 0.914272642 | -1.865637481 | 0.062092102 |    | 0.101793072 |
| Nav1       | 238.8553534 | -1.706375305 | 0.213100103 | -8.007388469 | 1.17E-15    |    | 1.28E-14    |
| Hnf1b      | 1010.491593 | -1.707513073 | 0.247245062 | -6.906156436 | 4.98E-12    |    | 3.78E-11    |
| Dennd3     | 171.0516929 | -1.707550824 | 0.368881242 | -4.628998796 | 3.67E-06    |    | 1.38E-05    |
| Bmp8a      | 0.527420442 | -1.707663225 | 3.005255975 | -0.568225549 | 0.569881825 | NA |             |
| Klrl1      | 32.20008361 | -1.708969567 | 0.537834424 | -3.177501274 | 0.0014855   |    | 0.003613048 |
| Tmcc3      | 334.1768192 | -1.70898178  | 0.242816648 | -7.03815737  | 1.95E-12    |    | 1.55E-11    |
| Gpx8       | 39.32641352 | -1.709119535 | 0.405832268 | -4.21139389  | 2.54E-05    |    | 8.42E-05    |
| Olfr78     | 3.931295418 | -1.70934245  | 1.347306841 | -1.268710585 | 0.204544306 |    | 0.282720231 |
| Atp1a4     | 2.324019323 | -1.709521946 | 1.388879497 | -1.230864124 | 0.218373687 |    | 0.298782875 |
| Bmp3       | 10.92251411 | -1.710305833 | 0.98451436  | -1.737207604 | 0.082350533 |    | 0.130499339 |
| Inka2      | 33.4161991  | -1.710779601 | 0.556751155 | -3.072790391 | 0.002120674 |    | 0.004990096 |
| Khdc3      | 2.527652281 | -1.711525133 | 1.888593564 | -0.906243231 | 0.364807126 |    | 0.4571284   |
| Ccdc14     | 59.49078311 | -1.71275511  | 0.339976893 | -5.037857414 | 4.71E-07    |    | 1.98E-06    |
| Gm3604     | 7.533601402 | -1.713126495 | 0.931632816 | -1.838843013 | 0.06593828  |    | 0.107314157 |
| Pld6       | 59.20963649 | -1.713366888 | 0.502697157 | -3.408348079 | 0.000653575 |    | 0.00170787  |
| Arl5c      | 26.86120614 | -1.71343359  | 0.60582936  | -2.82824456  | 0.004680404 |    | 0.010240185 |
| Gins3      | 24.73882009 | -1.713838322 | 0.614710096 | -2.788043232 | 0.005302747 |    | 0.011469326 |
| Shisa9     | 1.865870424 | -1.71429625  | 2.177829452 | -0.787158172 | 0.43118928  |    | 0.522601652 |
| Olfr212    | 0.525320337 | -1.714405126 | 3.584807082 | -0.478241949 | 0.632478009 | NA |             |
| Chia1      | 0.525495091 | -1.714800012 | 3.584527346 | -0.478389435 | 0.632373052 | NA |             |
| Pcdhgb4    | 11.84781818 | -1.714882967 | 0.814580972 | -2.105233275 | 0.035271007 |    | 0.062053677 |
| L3mbtl4    | 0.513124514 | -1.714942365 | 2.976040184 | -0.576249734 | 0.564446393 | NA |             |
| Glt6d1     | 0.533722696 | -1.715402699 | 2.539108546 | -0.675592503 | 0.499299403 | NA |             |
| Slc9a9     | 76.8935585  | -1.716101425 | 0.386489615 | -4.44022649  | 8.99E-06    |    | 3.20E-05    |
| Pcsk1      | 4.788563341 | -1.716234516 | 1.490390851 | -1.15153318  | 0.249512953 |    | 0.333780354 |
| Gm3417     | 2.458102419 | -1.716457756 | 2.273200091 | -0.755084325 | 0.450198388 |    | 0.541330379 |
| Pcdhb19    | 7.002771639 | -1.718028354 | 0.862489752 | -1.991940601 | 0.046377576 |    | 0.079104043 |
| Cdr2l      | 90.9049306  | -1.718083435 | 0.255366254 | -6.727918861 | 1.72E-11    |    | 1.22E-10    |
| Dmpk       | 790.0860299 | -1.718093669 | 0.31851047  | -5.394151319 | 6.88E-08    |    | 3.22E-07    |
| Ttc21a     | 0.670666992 | -1.718981623 | 2.778888288 | -0.618586083 | 0.536189072 | NA |             |
| Trbv26     | 0.527986489 | -1.720416251 | 3.580557014 | -0.480488439 | 0.630880122 | NA |             |
| Gm18856    | 0.527095603 | -1.721215697 | 2.9820019   | -0.577201409 | 0.563803406 | NA |             |
| Gm6796     | 0.537677658 | -1.722736915 | 2.536441164 | -0.679194511 | 0.497014625 | NA |             |
| Synpo2     | 20.08328478 | -1.723820427 | 0.600073525 | -2.872682023 | 0.004070035 |    | 0.009027949 |
| Fosl2      | 442.9276479 | -1.724160493 | 0.317204427 | -5.435486857 | 5.46E-08    |    | 2.59E-07    |
| Klrb1f     | 2.71496381  | -1.724617842 | 1.388890583 | -1.241723331 | 0.214338659 |    | 0.293969867 |
| Gm5263     | 0.539233017 | -1.725947641 | 2.535766435 | -0.68064141  | 0.496098418 | NA |             |
| Foxf2      | 1.269853137 | -1.726618531 | 1.732994728 | -0.996320706 | 0.319094346 | NA |             |
| Myrf       | 1773.336933 | -1.726981128 | 0.232639771 | -7.423413128 | 1.14E-13    |    | 1.02E-12    |
| Crim1      | 689.3880903 | -1.727143276 | 0.246536529 | -7.005628253 | 2.46E-12    |    | 1.92E-11    |
| Slc7a4     | 49.68959085 | -1.727733674 | 0.431934723 | -3.999987921 | 6.33E-05    |    | 0.000197534 |
| Tmc6       | 411.1336318 | -1.727943733 | 0.191829884 | -9.007687944 | 2.10E-19    |    | 3.18E-18    |
| Gm29201    | 0.534410659 | -1.728239888 | 3.593431353 | -0.480944178 | 0.630556173 | NA |             |
| Bank1      | 36.19592013 | -1.72879766  | 0.699657186 | -2.470921036 | 0.013476557 |    | 0.026442516 |
| Syt4       | 0.540722608 | -1.729880482 | 2.534904273 | -0.682424382 | 0.494970643 | NA |             |
| Slc9a4     | 2.00773747  | -1.730055678 | 1.78625018  | -0.96854052  | 0.332774492 |    | 0.424890619 |
| Gm48691    | 0.549475463 | -1.730416719 | 3.539158039 | -0.488934571 | 0.624888019 | NA |             |
| Prrg1      | 58.55620171 | -1.730746602 | 0.363539717 | -4.760818473 | 1.93E-06    |    | 7.46E-06    |

|           |             |              |             |              |                |             |
|-----------|-------------|--------------|-------------|--------------|----------------|-------------|
| Dysf      | 136.9341085 | -1.730939506 | 0.599876948 | -2.885490954 | 0.003908037    | 0.008697678 |
| Ankrd63   | 0.532315415 | -1.73146195  | 2.92201817  | -0.592556873 | 0.553477749 NA |             |
| Rab3d     | 401.3395375 | -1.73147474  | 0.193273425 | -8.958679883 | 3.29E-19       | 4.91E-18    |
| Gm13717   | 4.55565521  | -1.731578206 | 1.008914552 | -1.716278353 | 0.086111108    | 0.135852506 |
| Ccl11     | 2.149890956 | -1.731738947 | 1.72805409  | -1.002132374 | 0.316279664    | 0.407646156 |
| Tprn      | 182.9849518 | -1.731881062 | 0.378201497 | -4.579254913 | 4.67E-06       | 1.73E-05    |
| Gm12630   | 0.532668918 | -1.731998871 | 2.921683526 | -0.592808514 | 0.553309309 NA |             |
| Far1      | 132.3044332 | -1.732905545 | 0.291556161 | -5.943642353 | 2.79E-09       | 1.54E-08    |
| At1l      | 83.15363061 | -1.732923772 | 0.370550899 | -4.676614678 | 2.92E-06       | 1.11E-05    |
| Tpcn2     | 130.5242073 | -1.733363957 | 0.268704219 | -6.450825231 | 1.11E-10       | 7.22E-10    |
| Pcdha8    | 0.546066212 | -1.733652504 | 3.59327504  | -0.482471418 | 0.629471098 NA |             |
| Zfp850    | 15.00940771 | -1.733756795 | 0.622950491 | -2.783137377 | 0.005383601    | 0.011630924 |
| Gm9375    | 0.536775348 | -1.73395779  | 3.593238906 | -0.482561231 | 0.629407312 NA |             |
| Gm4691    | 1.237913743 | -1.734193615 | 1.980981356 | -0.875421473 | 0.381344621 NA |             |
| Ighv2-9   | 0.514168961 | -1.734341433 | 2.962725401 | -0.585387168 | 0.558287415 NA |             |
| Rapgef3   | 142.1444671 | -1.734738624 | 0.285205859 | -6.08240878  | 1.18E-09       | 6.84E-09    |
| Gm11810   | 0.548498047 | -1.735133559 | 2.245322894 | -0.772776852 | 0.439654455 NA |             |
| P2ry10    | 11.03139653 | -1.735338951 | 0.6863011   | -2.528538787 | 0.011453843    | 0.022953464 |
| Rtl8c     | 16.84740968 | -1.736019883 | 0.570843393 | -3.04114912  | 0.002356771    | 0.005493332 |
| Onecut3   | 3.163570918 | -1.736497102 | 1.245974009 | -1.393686456 | 0.163412308    | 0.233869461 |
| Agfg1     | 899.7892534 | -1.736723221 | 0.246050264 | -7.058408274 | 1.68E-12       | 1.35E-11    |
| Rps12-ps1 | 1.209562821 | -1.738414231 | 2.176895735 | -0.798574871 | 0.424536963 NA |             |
| F2r13     | 3.717273281 | -1.738599479 | 1.159597029 | -1.499313499 | 0.133792322    | 0.19765091  |
| Gm13592   | 0.548118904 | -1.738601457 | 3.593092999 | -0.483873214 | 0.628475852 NA |             |
| Ccser1    | 2.248584602 | -1.738704808 | 1.598805581 | -1.087502338 | 0.276814866    | 0.363878466 |
| Gm19029   | 0.541554416 | -1.739935326 | 2.991132283 | -0.581697886 | 0.560770196 NA |             |
| Lmo2      | 150.1445505 | -1.740212099 | 0.306802549 | -5.6720914   | 1.41E-08       | 7.17E-08    |
| Anxa4     | 2929.548633 | -1.740306318 | 0.238826547 | -7.286904838 | 3.17E-13       | 2.72E-12    |
| Cabp1     | 9.864286681 | -1.740648029 | 0.801319121 | -2.172228246 | 0.029838451    | 0.05352335  |
| Sdc3      | 1001.072152 | -1.741453289 | 0.367909104 | -4.73337917  | 2.21E-06       | 8.48E-06    |
| Skil      | 370.6385656 | -1.741573556 | 0.246690671 | -7.059746329 | 1.67E-12       | 1.33E-11    |
| Rab44     | 8.393224397 | -1.741812538 | 0.873229094 | -1.99467992  | 0.046077801    | 0.078687203 |
| Armcx6    | 16.59959777 | -1.741860605 | 0.698389171 | -2.494111705 | 0.01262728     | 0.024979098 |
| Cdc42se1  | 700.4331518 | -1.742353695 | 0.182225854 | -9.561506533 | 1.16E-21       | 2.12E-20    |
| Pacc1     | 87.88590608 | -1.742422099 | 0.34443046  | -5.058850187 | 4.22E-07       | 1.78E-06    |
| Gm9825    | 0.542685828 | -1.742513377 | 2.990042868 | -0.582772039 | 0.560046771 NA |             |
| Stxbp6    | 505.9423331 | -1.743282796 | 0.191619194 | -9.097641828 | 9.23E-20       | 1.44E-18    |
| Tbx4      | 1.188675535 | -1.7435545   | 1.910759447 | -0.912492937 | 0.361509286 NA |             |
| Coro6     | 22.59177453 | -1.744255886 | 0.668859054 | -2.607807841 | 0.009112409    | 0.018673922 |
| Slc25a36  | 192.7824512 | -1.744362021 | 0.407066693 | -4.285199579 | 1.83E-05       | 6.19E-05    |
| Mt1       | 1082.21974  | -1.744950301 | 0.499007706 | -3.49684039  | 0.000470803    | 0.00126406  |
| Mro       | 7.573761422 | -1.746481874 | 1.134567269 | -1.539337439 | 0.123721939    | 0.185099746 |
| Gm7860    | 1.180018233 | -1.746568655 | 2.144678699 | -0.814373107 | 0.41543124 NA  |             |
| Tarbp1    | 288.2803484 | -1.746949538 | 0.286894737 | -6.089165519 | 1.14E-09       | 6.58E-09    |
| C1s2      | 1.177713282 | -1.747465426 | 2.12970751  | -0.820518976 | 0.411920316 NA |             |
| Pold1     | 195.8327293 | -1.747496718 | 0.331621322 | -5.26955477  | 1.37E-07       | 6.18E-07    |
| Csm3      | 2.753118716 | -1.747498472 | 1.36169919  | -1.283321958 | 0.199379303    | 0.276500313 |
| Gbp9      | 262.7369996 | -1.747589016 | 0.330514695 | -5.287477508 | 1.24E-07       | 5.63E-07    |
| Dcbl1     | 154.0488771 | -1.747611886 | 0.34533773  | -5.060587748 | 4.18E-07       | 1.77E-06    |
| Ttll9     | 2.054456556 | -1.749313386 | 1.675896432 | -1.043807572 | 0.296574428    | 0.385983727 |
| Gm9696    | 1.194319138 | -1.74965296  | 1.911361917 | -0.915395951 | 0.359983803 NA |             |
| Il16      | 136.437174  | -1.74983886  | 0.296185029 | -5.907924738 | 3.46E-09       | 1.89E-08    |
| Zfp821    | 121.8889331 | -1.750120307 | 0.304870291 | -5.740540668 | 9.44E-09       | 4.91E-08    |
| Micall2   | 86.21349318 | -1.750414714 | 0.402045558 | -4.353772058 | 1.34E-05       | 4.63E-05    |
| Ptgr1     | 206.9372091 | -1.750903486 | 0.238479209 | -7.34195444  | 2.10E-13       | 1.84E-12    |
| Fbxw14    | 2.19111384  | -1.751154536 | 1.670295848 | -1.0484098   | 0.29444984     | 0.383687295 |
| Dsg2      | 5519.717717 | -1.751172102 | 0.234355354 | -7.472293991 | 7.88E-14       | 7.18E-13    |
| Itga4     | 204.4606594 | -1.751812632 | 0.254309473 | -6.888507194 | 5.64E-12       | 4.25E-11    |
| Gm6583    | 0.547050784 | -1.751854472 | 2.985812182 | -0.586726279 | 0.557387555 NA |             |
| Stmn2     | 8.030802015 | -1.754647574 | 1.200466254 | -1.4616384   | 0.143840326    | 0.210109663 |
| Tbxas1    | 118.6048511 | -1.75483738  | 0.430855992 | -4.07290931  | 4.64E-05       | 0.000147922 |
| Gm28036   | 59.09605281 | -1.755831306 | 1.210663598 | -1.450304865 | 0.146973523    | 0.214141853 |
| Hspb7     | 14.0818016  | -1.756201992 | 0.754134874 | -2.328763795 | 0.019871582    | 0.037363046 |
| Gm9959    | 0.549414578 | -1.757128986 | 2.983763508 | -0.588896868 | 0.555930459 NA |             |
| Htra1     | 74.78038115 | -1.7572663   | 0.451692981 | -3.890399842 | 0.000100079    | 0.000302562 |
| Tmem154   | 19.25939925 | -1.758659132 | 0.615431211 | -2.857604718 | 0.004268518    | 0.009433457 |

|               |             |              |             |              |             |             |
|---------------|-------------|--------------|-------------|--------------|-------------|-------------|
| Wfdc17        | 157.6672661 | -1.758739497 | 0.39807184  | -4.418145972 | 9.96E-06    | 3.52E-05    |
| Acot2         | 274.8419464 | -1.758964402 | 0.298155277 | -5.899491095 | 3.65E-09    | 1.99E-08    |
| Lrp2          | 100.8686105 | -1.759376623 | 0.699300894 | -2.515907872 | 0.011872621 | 0.023661965 |
| Aldh3a1       | 0.55063647  | -1.759659238 | 2.945985128 | -0.597307577 | 0.550302047 | NA          |
| Col9a3        | 15.85286438 | -1.760231073 | 0.624983958 | -2.816442007 | 0.004855881 | 0.010585813 |
| Nuak2         | 649.1385036 | -1.760740284 | 0.391117968 | -4.501813853 | 6.74E-06    | 2.44E-05    |
| Jpt1          | 608.4016846 | -1.760976472 | 0.221468749 | -7.951354219 | 1.84E-15    | 1.98E-14    |
| Gipr          | 0.551183065 | -1.761180338 | 2.981942443 | -0.590615135 | 0.554778322 | NA          |
| Lrrc2         | 4.783549207 | -1.761340097 | 1.087264489 | -1.619973902 | 0.105237883 | 0.161194558 |
| Rpl39-ps      | 0.551207804 | -1.761469544 | 2.981273772 | -0.590844612 | 0.554624541 | NA          |
| Ets1          | 533.3651378 | -1.761631517 | 0.237055028 | -7.431318945 | 1.08E-13    | 9.70E-13    |
| Kcne2         | 0.556407818 | -1.761713126 | 2.525704309 | -0.697513608 | 0.485481426 | NA          |
| Gm9797        | 15.42102057 | -1.763743667 | 2.896778063 | -0.608863927 | 0.542614636 | 0.629285328 |
| Akr1b10       | 68.97263031 | -1.763991465 | 0.394631472 | -4.469971581 | 7.82E-06    | 2.80E-05    |
| Zpbp          | 1.200880816 | -1.764199395 | 2.131764394 | -0.8275771   | 0.407910042 | NA          |
| Gm5540        | 0.557436668 | -1.764247493 | 2.525457746 | -0.698585235 | 0.484811274 | NA          |
| Frem1         | 30.14246232 | -1.765851679 | 0.538573034 | -3.278759921 | 0.001042643 | 0.002617046 |
| Ltc4s         | 23.5459019  | -1.766844367 | 0.51257754  | -3.446979683 | 0.000566891 | 0.001499978 |
| Gm43743       | 0.554603176 | -1.767287377 | 2.976972561 | -0.593652558 | 0.55274452  | NA          |
| Mms22l        | 76.86214483 | -1.767359674 | 0.465016351 | -3.800639851 | 0.000144323 | 0.000425016 |
| Smarca5-ps    | 0.57669714  | -1.768888383 | 2.998069279 | -0.590009175 | 0.555184498 | NA          |
| Agbl2         | 8.646986034 | -1.769392383 | 0.837567577 | -2.112536864 | 0.034640428 | 0.061082955 |
| Efna2         | 4.628368279 | -1.770096201 | 1.028800319 | -1.720543985 | 0.085333606 | 0.134738104 |
| Slc51b        | 42.36658656 | -1.770958083 | 0.638974727 | -2.771562015 | 0.005578804 | 0.012017622 |
| Gm8307        | 0.56151984  | -1.771649474 | 2.523630293 | -0.702024175 | 0.482664087 | NA          |
| Svop          | 0.61566235  | -1.772075583 | 2.446648376 | -0.724286988 | 0.468889564 | NA          |
| Zwilch        | 91.5763002  | -1.772618374 | 0.461310667 | -3.842569662 | 0.000121753 | 0.000362304 |
| Ankrd55       | 11.68420669 | -1.772973308 | 0.877524526 | -2.020425931 | 0.043339226 | 0.074510601 |
| Bambi         | 143.5409877 | -1.773741231 | 0.278763542 | -6.362888116 | 1.98E-10    | 1.25E-09    |
| 4930579G24Rik | 26.99512861 | -1.774279816 | 0.522040239 | -3.398741482 | 0.000676967 | 0.001761705 |
| Cenpt         | 132.3884682 | -1.775163712 | 0.299054118 | -5.935927992 | 2.92E-09    | 1.61E-08    |
| Cavin2        | 407.3022995 | -1.776155175 | 0.286861696 | -6.19167773  | 5.95E-10    | 3.55E-09    |
| L3mbtl3       | 265.9651223 | -1.776580563 | 0.195522451 | -9.086325146 | 1.02E-19    | 1.59E-18    |
| Arpc1b        | 1290.394686 | -1.776752489 | 0.195469817 | -9.089651347 | 9.94E-20    | 1.55E-18    |
| Ptprcap       | 20.52407187 | -1.77680885  | 0.580976172 | -3.05831622  | 0.002225846 | 0.005216692 |
| Defb36        | 0.538591657 | -1.776816029 | 2.892746568 | -0.614231488 | 0.539062369 | NA          |
| Hivep3        | 58.39175757 | -1.776978794 | 0.383358028 | -4.63529825  | 3.56E-06    | 1.34E-05    |
| Mlana         | 0.538558914 | -1.776982025 | 2.892788031 | -0.614280067 | 0.539030272 | NA          |
| Mybpc2        | 3.490967895 | -1.777151929 | 1.373661668 | -1.293733362 | 0.195757537 | 0.272319274 |
| 2510009E07Rik | 242.3645018 | -1.777563074 | 0.19761587  | -8.99504211  | 2.36E-19    | 3.56E-18    |
| Kcnq3         | 24.84186563 | -1.777685456 | 0.482784163 | -3.682153626 | 0.000231272 | 0.000656792 |
| Kcnk6         | 86.29983536 | -1.778988009 | 0.301552025 | -5.899439764 | 3.65E-09    | 1.99E-08    |
| Gm16270       | 0.533923292 | -1.77904085  | 2.942228777 | -0.604657552 | 0.545406558 | NA          |
| Cyfp12        | 78.84965138 | -1.779258808 | 0.311361949 | -5.714438815 | 1.10E-08    | 5.67E-08    |
| Stmn1-rs1     | 0.539786047 | -1.780434808 | 2.891693174 | -0.615706682 | 0.538088127 | NA          |
| Shisa5        | 1204.146139 | -1.782105088 | 0.123322812 | -14.45073351 | 2.48E-47    | 3.04E-45    |
| Trpm4         | 100.0483695 | -1.782289286 | 0.431291765 | -4.132444509 | 3.59E-05    | 0.000116507 |
| Btg3          | 196.6139548 | -1.782344845 | 0.228787382 | -7.790398373 | 6.68E-15    | 6.76E-14    |
| Insl3         | 28.07791116 | -1.782469999 | 0.459743973 | -3.877092692 | 0.000105712 | 0.000318294 |
| Gm45598       | 1.218295013 | -1.782802405 | 2.155362389 | -0.827147404 | 0.408153519 | NA          |
| Fli1          | 97.18938902 | -1.783374329 | 0.293904512 | -6.067869856 | 1.30E-09    | 7.45E-09    |
| Gm6311        | 5.447259816 | -1.783504687 | 1.16847593  | -1.526351243 | 0.126922413 | 0.189058393 |
| Csgalnact1    | 14.57651908 | -1.783998251 | 0.583861642 | -3.055515422 | 0.00224674  | 0.0052606   |
| BC051142      | 2.711116291 | -1.784258596 | 1.704954611 | -1.046513839 | 0.295323859 | 0.384708577 |
| Rcn2          | 299.8081855 | -1.784632451 | 0.244334818 | -7.304044778 | 2.79E-13    | 2.41E-12    |
| Igkv4-70      | 2.165387638 | -1.785512114 | 1.674121029 | -1.066537056 | 0.286180937 | 0.374601705 |
| Cpt1c         | 60.67135016 | -1.786945534 | 0.445019272 | -4.015434039 | 5.93E-05    | 0.000185711 |
| Hilpda        | 107.6556011 | -1.787135858 | 0.257474886 | -6.94101038  | 3.89E-12    | 2.98E-11    |
| Gm11560       | 1.268115188 | -1.788285775 | 1.798062921 | -0.994562401 | 0.319949142 | NA          |
| Col6a1        | 360.1635619 | -1.789346418 | 0.233742626 | -7.655199443 | 1.93E-14    | 1.87E-13    |
| Gm46369       | 1.215289949 | -1.790044012 | 2.133349703 | -0.839076692 | 0.401426274 | NA          |
| Myo18b        | 8.644400526 | -1.790060667 | 0.801462933 | -2.233491522 | 0.025516549 | 0.046624451 |
| Sdcbp2        | 8.625642744 | -1.790609708 | 0.766118951 | -2.337247636 | 0.019426312 | 0.036634929 |
| Tmem52        | 3.565259247 | -1.790853274 | 1.467601806 | -1.220258293 | 0.222366975 | 0.303312728 |
| Fbxl13        | 3.271095246 | -1.792159607 | 1.237864223 | -1.447783669 | 0.147677561 | 0.215069799 |
| Frmpp4        | 0.534601153 | -1.792353868 | 3.590939631 | -0.499132275 | 0.617686201 | NA          |



|               |             |              |             |              |             |             |
|---------------|-------------|--------------|-------------|--------------|-------------|-------------|
| Akp3          | 8.263020056 | -1.792857755 | 2.507584396 | -0.714974043 | NA          | NA          |
| Creb3l1       | 55.64262484 | -1.793860629 | 0.331852132 | -5.405602249 | 6.46E-08    | 3.03E-07    |
| Tmem164       | 357.1896777 | -1.794316803 | 0.270216534 | -6.640292424 | 3.13E-11    | 2.17E-10    |
| Gm16026       | 0.547293701 | -1.794546062 | 3.533415521 | -0.507878581 | 0.611538496 | NA          |
| Fam180a       | 54.87780947 | -1.794816771 | 0.596462263 | -3.009103645 | 0.002620197 | 0.006045354 |
| Renbp         | 127.2647838 | -1.795218276 | 0.437162422 | -4.106524682 | 4.02E-05    | 0.000129197 |
| Pcdhb3        | 2.188814267 | -1.796249376 | 1.524592341 | -1.178183392 | 0.238723502 | 0.322050982 |
| Gm7776        | 0.551423486 | -1.797188658 | 3.522643305 | -0.510181844 | 0.609924071 | NA          |
| Abra          | 0.568541232 | -1.798241996 | 2.966065396 | -0.606271864 | 0.544334239 | NA          |
| Atp2b2        | 42.36711031 | -1.799812849 | 0.578207204 | -3.112747189 | 0.001853547 | 0.004413306 |
| Atp7a         | 96.77682874 | -1.800811921 | 0.403949453 | -4.458013021 | 8.27E-06    | 2.95E-05    |
| Arhgap10      | 103.5280351 | -1.800992109 | 0.440002784 | -4.09313799  | 4.26E-05    | 0.000136417 |
| Ppm1h         | 126.4044082 | -1.800994266 | 0.280151126 | -6.428652601 | 1.29E-10    | 8.31E-10    |
| A930004D18Rik | 61.14056964 | -1.801145628 | 0.478282185 | -3.765863925 | 0.000165974 | 0.000484094 |
| Prkd          | 604.3186781 | -1.801443656 | 0.214647508 | -8.392567305 | 4.76E-17    | 5.91E-16    |
| Glod5         | 3.524211855 | -1.801610188 | 1.40630614  | -1.281093879 | 0.200160694 | 0.277448533 |
| Socs1         | 19.08991867 | -1.80176275  | 0.638380291 | -2.822397207 | 0.004766661 | 0.010403427 |
| Tmem200a      | 13.82438926 | -1.801900717 | 0.673353937 | -2.676008288 | 0.00745048  | 0.015596241 |
| Magi2         | 13.83251265 | -1.802622162 | 0.765820558 | -2.353844048 | 0.018580405 | 0.035195415 |
| Unc5a         | 38.18288484 | -1.803186699 | 0.390427559 | -4.618492365 | 3.87E-06    | 1.45E-05    |
| Dnajc27       | 39.74593828 | -1.803557032 | 0.437966759 | -4.118022646 | 3.82E-05    | 0.000123361 |
| Insyn1        | 10.66615479 | -1.804743614 | 0.751516473 | -2.401469133 | 0.016329387 | 0.031391902 |
| Rnase1        | 0.57113595  | -1.804768863 | 2.964022405 | -0.608891775 | 0.542596176 | NA          |
| Hoxa5         | 13.72447438 | -1.805509906 | 0.764413125 | -2.361955658 | 0.018178816 | 0.034538333 |
| Dnah10        | 0.557858374 | -1.80603748  | 2.901698905 | -0.622406974 | 0.533674331 | NA          |
| Rwdd2a        | 7.549945789 | -1.806527938 | 1.03763496  | -1.741005275 | 0.081682654 | 0.12956833  |
| Ppfi1bp1      | 1361.765726 | -1.806608861 | 0.175863964 | -10.27276321 | 9.35E-25    | 2.17E-23    |
| Gm48909       | 0.545045271 | -1.808536824 | 3.527873884 | -0.512642142 | 0.608201669 | NA          |
| Fstl4         | 3.577127123 | -1.808556843 | 1.324909855 | -1.36504143  | 0.172240029 | 0.244593754 |
| BCO28528      | 48.89191477 | -1.809280635 | 0.357176299 | -5.065511462 | 4.07E-07    | 1.73E-06    |
| Brca1         | 95.84865754 | -1.809285985 | 0.573286932 | -3.155986793 | 0.001599561 | 0.003865247 |
| Cd3e          | 19.10857612 | -1.809373411 | 0.584297702 | -3.096663574 | 0.001957119 | 0.004633378 |
| Casp2         | 240.5136388 | -1.81075172  | 0.235036834 | -7.704118916 | 1.32E-14    | 1.29E-13    |
| Rttm          | 57.08823893 | -1.810817857 | 0.393026802 | -4.607364805 | 4.08E-06    | 1.52E-05    |
| Cdkl4         | 7.416577109 | -1.81101839  | 0.886791521 | -2.042214373 | 0.041130271 | 0.071128917 |
| Gm35876       | 3.379364806 | -1.811123962 | 1.153789902 | -1.569717294 | 0.116480896 | 0.175933934 |
| 4930426L09Rik | 2.234854045 | -1.811307857 | 1.584409329 | -1.143207014 | 0.252952651 | 0.337745676 |
| Mospd4        | 1.338016798 | -1.811577598 | 1.721247049 | -1.052479712 | 0.292579514 | NA          |
| Nod2          | 21.49463107 | -1.811899619 | 0.525838249 | -3.445735687 | 0.000569507 | 0.001506666 |
| Hoxb6         | 1.915052429 | -1.812376366 | 1.499168549 | -1.208921016 | 0.226693191 | 0.308408389 |
| Defa24        | 0.565635929 | -1.813093513 | 3.590139266 | -0.505020385 | 0.613544519 | NA          |
| Gm21742       | 0.565635929 | -1.813093513 | 3.590139266 | -0.505020385 | 0.613544519 | NA          |
| Gm4202        | 0.565635929 | -1.813093513 | 3.590139266 | -0.505020385 | 0.613544519 | NA          |
| Fgf21         | 48.5832557  | -1.81316397  | 0.527597233 | -3.436644199 | 0.000588969 | 0.001554535 |
| Prelid2       | 11.05391646 | -1.813569446 | 0.866554001 | -2.092852198 | 0.036362351 | 0.063750036 |
| Gm5039        | 0.578441826 | -1.813685014 | 3.467094835 | -0.523113759 | 0.600895091 | NA          |
| Igkw4-86      | 0.556546997 | -1.81490815  | 2.461198226 | -0.737408361 | 0.460874053 | NA          |
| Lims1         | 678.4796491 | -1.814999094 | 0.271987813 | -6.673089777 | 2.50E-11    | 1.75E-10    |
| Cenph         | 30.06044218 | -1.815063278 | 0.592850561 | -3.061586505 | 0.002201674 | 0.005165721 |
| Pcdhb15       | 1.286706874 | -1.815661671 | 2.002188367 | -0.906838588 | 0.364492161 | NA          |
| Sh2d4a        | 409.5546363 | -1.816356472 | 0.259387458 | -7.002483804 | 2.51E-12    | 1.97E-11    |
| Gm8369        | 8.473666602 | -1.816464208 | 0.818029266 | -2.220536948 | 0.02638234  | 0.048041673 |
| Arhgef16      | 328.3283979 | -1.816495566 | 0.227192389 | -7.995406756 | 1.29E-15    | 1.41E-14    |
| Itga8         | 185.311005  | -1.816722704 | 0.339392139 | -5.35287207  | 8.66E-08    | 4.00E-07    |
| Skp2          | 120.0742634 | -1.816907177 | 0.287221893 | -6.325796261 | 2.52E-10    | 1.57E-09    |
| Cyp2c66       | 0.567786493 | -1.817181179 | 3.590061807 | -0.506169887 | 0.612737393 | NA          |
| Flrt2         | 18.42355702 | -1.818093293 | 0.647968693 | -2.805835085 | 0.005018637 | 0.010910192 |
| Ripk4         | 212.8643772 | -1.8183913   | 0.297348433 | -6.115355242 | 9.63E-10    | 5.63E-09    |
| Gm19014       | 0.578053043 | -1.818518898 | 2.921813699 | -0.622393857 | 0.533682919 | NA          |
| Gm19015       | 0.578053043 | -1.818518898 | 2.921813699 | -0.622393857 | 0.533682919 | NA          |
| Mst1r         | 22.2168749  | -1.818582766 | 0.665025612 | -2.734605606 | 0.006245506 | 0.013282608 |
| Pvr           | 447.5018943 | -1.820858291 | 0.260914742 | -6.978748218 | 2.98E-12    | 2.30E-11    |
| Adgra2        | 189.2548502 | -1.82229634  | 0.342224271 | -5.324860028 | 1.01E-07    | 4.64E-07    |
| Cmtm3         | 267.6603315 | -1.822500973 | 0.211699297 | -8.608913681 | 7.38E-18    | 9.85E-17    |
| Lrmp          | 107.6628533 | -1.82273488  | 0.329419877 | -5.533166605 | 3.15E-08    | 1.53E-07    |
| Gpr161        | 9.158259985 | -1.823187626 | 0.810020037 | -2.250793244 | 0.024398636 | 0.044846904 |

|               |             |              |             |              |             |             |
|---------------|-------------|--------------|-------------|--------------|-------------|-------------|
| Pilrb2        | 35.83140023 | -1.82320823  | 0.79848418  | -2.283336698 | 0.022410543 | 0.04160912  |
| Gm14303       | 94.11811721 | -1.823253849 | 1.543407282 | -1.181317382 | 0.237476665 | 0.320724248 |
| Tgfbr2        | 1034.808098 | -1.823478759 | 0.178179532 | -10.23394069 | 1.40E-24    | 3.17E-23    |
| Sbsn          | 87.31143594 | -1.823606222 | 0.52240302  | -3.490803368 | 0.000481571 | 0.001291257 |
| Gmip          | 341.2004158 | -1.825210858 | 0.20850496  | -8.753800685 | 2.06E-18    | 2.89E-17    |
| Gsta1         | 795.71734   | -1.825607426 | 0.712674516 | -2.561628605 | 0.010418266 | 0.021063876 |
| Igkv9-124     | 4.479746656 | -1.82638044  | 1.468157692 | -1.243994736 | 0.2135015   | 0.29303386  |
| Tvp23a        | 6.71908339  | -1.826825264 | 1.057082496 | -1.728176628 | 0.083956563 | 0.132809824 |
| Phf20         | 320.8938948 | -1.828364862 | 0.263933851 | -6.927360223 | 4.29E-12    | 3.27E-11    |
| MF597757.2    | 4.293467822 | -1.829445717 | 1.36668012  | -1.33860564  | 0.180699089 | 0.254675767 |
| Loxl3         | 80.9991167  | -1.829549038 | 0.324151348 | -5.644119795 | 1.66E-08    | 8.37E-08    |
| Mzb1          | 17.72070759 | -1.829552998 | 0.714288387 | -2.561364612 | 0.010426187 | 0.021074892 |
| Opn3          | 16.68286005 | -1.829986737 | 0.593603971 | -3.082841131 | 0.002050346 | 0.004835957 |
| Gm37009       | 0.560776832 | -1.831151823 | 2.4590674   | -0.744652962 | 0.456481542 | NA          |
| Armc2         | 16.63109246 | -1.831493936 | 0.745041909 | -2.458242835 | 0.013961873 | 0.027296102 |
| Tnfrsf17      | 1.216769622 | -1.83168143  | 2.236634473 | -0.818945363 | 0.412817587 | NA          |
| Mxra7         | 106.8527503 | -1.832029693 | 0.324581997 | -5.644273894 | 1.66E-08    | 8.36E-08    |
| H2-M3         | 100.7324718 | -1.832158842 | 0.325184076 | -5.634220667 | 1.76E-08    | 8.84E-08    |
| Gm20517       | 2.574153909 | -1.832341866 | 1.519079042 | -1.20621891  | 0.227733094 | 0.309699569 |
| Acta2         | 188.4490195 | -1.832455881 | 0.485974251 | -3.770685132 | 0.0001628   | 0.000475161 |
| Gm13688       | 0.561198045 | -1.832540695 | 2.458863732 | -0.745279485 | 0.456102781 | NA          |
| Plk2          | 721.028603  | -1.832685476 | 0.281995642 | -6.498985096 | 8.09E-11    | 5.34E-10    |
| Gm8459        | 0.561341633 | -1.833013011 | 2.458794701 | -0.745492501 | 0.455974043 | NA          |
| Ticam2        | 24.79250539 | -1.833200613 | 0.484543446 | -3.783356535 | 0.000154728 | 0.000452918 |
| Insyn2b       | 0.58469222  | -1.833303843 | 2.952355587 | -0.620963088 | 0.53462391  | NA          |
| Gm6902        | 0.568180017 | -1.833786221 | 3.592365494 | -0.510467608 | 0.609723902 | NA          |
| Jaml          | 41.42684317 | -1.834118416 | 0.761780728 | -2.407672378 | 0.016054581 | 0.030936871 |
| Zscan4c       | 0.565359763 | -1.834227284 | 2.867958353 | -0.639558549 | 0.522459638 | NA          |
| Ifi207        | 250.113286  | -1.835129234 | 0.260923413 | -7.033210286 | 2.02E-12    | 1.60E-11    |
| Ifi208        | 40.92306896 | -1.835724017 | 0.57306162  | -3.203362348 | 0.00135833  | 0.003337677 |
| Srpx          | 20.33357741 | -1.83758515  | 0.534941526 | -3.435114044 | 0.000592305 | 0.001562136 |
| Igkv12-98     | 1.246783401 | -1.837683336 | 1.949567474 | -0.942610789 | 0.345880019 | NA          |
| Agap1         | 528.5844075 | -1.837914222 | 0.344561737 | -5.334063608 | 9.60E-08    | 4.42E-07    |
| Clstn1        | 202.6901289 | -1.838284358 | 0.315246915 | -5.831252492 | 5.50E-09    | 2.93E-08    |
| Chml          | 103.9033424 | -1.838452453 | 0.321452767 | -5.719199344 | 1.07E-08    | 5.53E-08    |
| Rhbdf2        | 585.3439395 | -1.839189739 | 0.198134158 | -9.282547523 | 1.65E-20    | 2.74E-19    |
| 1700001J03Rik | 1.142499281 | -1.83967102  | 1.784069756 | -1.031165409 | 0.302463259 | NA          |
| Cdh5          | 513.1434996 | -1.84012725  | 0.292278049 | -6.295810634 | 3.06E-10    | 1.89E-09    |
| Lypd1         | 4.023027789 | -1.842713484 | 1.562107406 | -1.179633024 | 0.238146202 | 0.321475687 |
| Piezo2        | 67.40913903 | -1.843182005 | 0.470206536 | -3.919941269 | 8.86E-05    | 0.00027031  |
| Grk3          | 413.6073596 | -1.843806826 | 0.278428316 | -6.6221958   | 3.54E-11    | 2.43E-10    |
| Rinl          | 58.44900797 | -1.84384502  | 0.39882748  | -4.623164432 | 3.78E-06    | 1.42E-05    |
| Nipa1         | 56.68151711 | -1.843959226 | 0.33199081  | -5.554247801 | 2.79E-08    | 1.37E-07    |
| Akt3          | 82.81926235 | -1.844114249 | 0.338656262 | -5.44538653  | 5.17E-08    | 2.45E-07    |
| Nccrp1        | 2.564325481 | -1.844325515 | 1.546473206 | -1.192601015 | 0.233025668 | 0.315763579 |
| Gnrhr         | 0.581596104 | -1.844427203 | 3.586376239 | -0.514287147 | 0.607051247 | NA          |
| Trb1-2        | 0.68299712  | -1.844857445 | 2.926714971 | -0.63035091  | 0.528465021 | NA          |
| Clec4a4       | 1.399655553 | -1.845193166 | 1.793679625 | -1.028719477 | 0.303611515 | NA          |
| Gm7862        | 0.573257188 | -1.845293216 | 3.491237485 | -0.528549898 | 0.597117724 | NA          |
| Fancb         | 39.90014302 | -1.845358993 | 0.481395483 | -3.833353362 | 0.000126408 | 0.000375371 |
| Slc4a5        | 2.987593077 | -1.845630544 | 1.495833857 | -1.233847286 | 0.217259816 | 0.297596809 |
| Gk5           | 7.44698496  | -1.845889208 | 0.792506865 | -2.329177564 | 0.019849661 | 0.037325945 |
| Tnfrsf23      | 29.31862863 | -1.84640551  | 0.453129388 | -4.074786497 | 4.61E-05    | 0.000146871 |
| Pycr2         | 186.8823796 | -1.847021773 | 0.223353217 | -8.269510508 | 1.35E-16    | 1.59E-15    |
| Olftr1245     | 0.548522909 | -1.847769636 | 3.588822103 | -0.514867994 | 0.606645268 | NA          |
| Boll          | 0.59659719  | -1.847856656 | 2.440944526 | -0.757025257 | 0.449034731 | NA          |
| Lmo1          | 2.140047902 | -1.850441035 | 1.660660036 | -1.114280464 | 0.265158885 | 0.351019465 |
| Mettl4-ps1    | 1.346902731 | -1.850554631 | 1.856990262 | -0.996534375 | 0.318990574 | NA          |
| Gpx7          | 143.8997978 | -1.850847805 | 0.233533746 | -7.925397678 | 2.27E-15    | 2.41E-14    |
| Gm45246       | 0.582395111 | -1.851190052 | 3.585373923 | -0.516317152 | 0.605632919 | NA          |
| Wnt6          | 1.020765438 | -1.85246481  | 2.197278339 | -0.84307244  | 0.399187931 | NA          |
| Traip         | 28.23037894 | -1.852993413 | 0.572064527 | -3.239133567 | 0.001198934 | 0.002979074 |
| Mfrp          | 0.580684046 | -1.85314616  | 2.883465682 | -0.642680151 | 0.520431663 | NA          |
| Dip2a         | 211.6729632 | -1.85323055  | 0.266173502 | -6.962490763 | 3.34E-12    | 2.58E-11    |
| Fam189b       | 49.09713379 | -1.854214964 | 0.350692952 | -5.28728894  | 1.24E-07    | 5.63E-07    |
| Nr4a3         | 8.961633628 | -1.854547329 | 0.953023032 | -1.945962759 | 0.051659213 | 0.086827001 |



|               |             |              |             |              |             |             |
|---------------|-------------|--------------|-------------|--------------|-------------|-------------|
| Tbx20         | 90.3838701  | -1.854883891 | 0.274949181 | -6.746279015 | 1.52E-11    | 1.09E-10    |
| Sh2d4b        | 7.661720591 | -1.855891026 | 0.947743345 | -1.958221111 | 0.050204073 | 0.08467343  |
| Itpril1       | 151.6951562 | -1.85590669  | 0.283421628 | -6.548218295 | 5.82E-11    | 3.92E-10    |
| Mical1        | 120.0604913 | -1.856699528 | 0.317586151 | -5.846286195 | 5.03E-09    | 2.69E-08    |
| Il2rb         | 71.18172088 | -1.857131688 | 0.344359741 | -5.392998853 | 6.93E-08    | 3.24E-07    |
| Cacna1a       | 74.10609878 | -1.858963215 | 0.595300913 | -3.122728646 | 0.001791829 | 0.004278676 |
| Trim30a       | 224.8374781 | -1.859868478 | 0.36563347  | -5.086701931 | 3.64E-07    | 1.56E-06    |
| Psd4          | 152.8913279 | -1.861352783 | 0.461812065 | -4.030541694 | 5.56E-05    | 0.000174939 |
| Sh3rf1        | 136.4789754 | -1.862246992 | 0.316832207 | -5.877707356 | 4.16E-09    | 2.25E-08    |
| Mark1         | 49.86829364 | -1.86333832  | 0.369470376 | -5.043268535 | 4.58E-07    | 1.93E-06    |
| Fam189a2      | 16.48360982 | -1.863735953 | 0.683136302 | -2.728205113 | 0.006368    | 0.013522877 |
| Gata6         | 409.8533091 | -1.864057502 | 0.22319571  | -8.351672631 | 6.73E-17    | 8.21E-16    |
| Zfp532        | 221.7358027 | -1.864146532 | 0.3080478   | -6.051484644 | 1.44E-09    | 8.19E-09    |
| Sec14l5       | 8.012325906 | -1.864177976 | 0.851134454 | -2.190227369 | 0.028507751 | 0.051462836 |
| Prap1         | 7.689918458 | -1.864263295 | 1.619630073 | -1.151042652 | NA          | NA          |
| Gm47937       | 0.585250785 | -1.865096962 | 3.512384277 | -0.531005954 | 0.595414654 | NA          |
| Rln3          | 0.594131477 | -1.865523339 | 3.567700364 | -0.522892381 | 0.601049147 | NA          |
| Fam205a3      | 0.589140284 | -1.865927106 | 3.57638444  | -0.521735607 | 0.601854429 | NA          |
| Map3k1        | 817.3189684 | -1.866015287 | 0.209859012 | -8.891756745 | 6.02E-19    | 8.77E-18    |
| Gm12250       | 31.77363259 | -1.866101298 | 0.696908014 | -2.677686668 | 0.007413253 | 0.015522683 |
| Dsg4          | 0.592115428 | -1.866303192 | 2.950717796 | -0.632491251 | 0.527065923 | NA          |
| Ccr3          | 6.022335811 | -1.867213885 | 1.315292153 | -1.419619118 | 0.155718597 | 0.2249166   |
| Rrh           | 1.219061532 | -1.867775516 | 1.941827376 | -0.96186486  | 0.336117492 | NA          |
| Gm14197       | 2.29659393  | -1.868921045 | 1.768718598 | -1.056652566 | 0.290670181 | 0.379690847 |
| Cd36          | 2244.532087 | -1.87088777  | 0.242815738 | -7.704969155 | 1.31E-14    | 1.29E-13    |
| Ptprs         | 504.4742958 | -1.871002262 | 0.226229772 | -8.270362679 | 1.34E-16    | 1.58E-15    |
| Sytl2         | 41.46946388 | -1.871301074 | 0.583478531 | -3.207146406 | 0.001340588 | 0.00329836  |
| Tgm2          | 5717.828601 | -1.872029721 | 0.169064417 | -11.07287836 | 1.70E-28    | 5.22E-27    |
| Prkab2        | 187.9318861 | -1.873076897 | 0.24655018  | -7.597142678 | 3.03E-14    | 2.89E-13    |
| Zfp456        | 24.23328299 | -1.873735665 | 0.513976851 | -3.645564314 | 0.000266806 | 0.000748848 |
| Gm11870       | 0.585178958 | -1.874175492 | 2.850926658 | -0.65739169  | 0.510929094 | NA          |
| Klri2         | 5.69640168  | -1.874204158 | 1.085383941 | -1.726766066 | 0.084209685 | 0.133173164 |
| Gabre         | 15.74579159 | -1.874639819 | 0.746714624 | -2.510517083 | 0.012055449 | 0.023978683 |
| Tax1bp3       | 764.2040302 | -1.874738018 | 0.209860758 | -8.933247149 | 4.14E-19    | 6.14E-18    |
| Cd300lf       | 126.8842427 | -1.874864757 | 0.365427825 | -5.130602079 | 2.89E-07    | 1.25E-06    |
| Pilrb1        | 47.42796562 | -1.876830004 | 0.735791233 | -2.550764292 | 0.010748699 | 0.021652349 |
| Tal2          | 1.373583652 | -1.877396679 | 1.858762102 | -1.010025262 | 0.312483187 | NA          |
| Gm5148        | 38.84069089 | -1.877466834 | 0.370617982 | -5.065773716 | 4.07E-07    | 1.72E-06    |
| Rps15a-ps4    | 0.593924791 | -1.878030062 | 2.843852824 | -0.660382298 | 0.509008529 | NA          |
| Pam           | 646.4387985 | -1.87805483  | 0.216049443 | -8.692708514 | 3.54E-18    | 4.84E-17    |
| Zdhc1         | 163.6714107 | -1.879044663 | 0.294629248 | -6.377658274 | 1.80E-10    | 1.14E-09    |
| Gfd01         | 44.92060832 | -1.87935251  | 0.430271127 | -4.367833191 | 1.25E-05    | 4.35E-05    |
| Eif4a3l1      | 0.609322179 | -1.879439474 | 2.431437612 | -0.772974583 | 0.439537423 | NA          |
| Rilpl1        | 89.90328066 | -1.879653915 | 0.301666534 | -6.230899694 | 4.64E-10    | 2.80E-09    |
| Prex1         | 306.3386963 | -1.879930527 | 0.243137759 | -7.731956296 | 1.06E-14    | 1.05E-13    |
| Vasp          | 811.1884562 | -1.880388374 | 0.210466076 | -8.934401268 | 4.09E-19    | 6.08E-18    |
| Fbxl7         | 17.75498412 | -1.882028558 | 0.637392528 | -2.952699436 | 0.003150085 | 0.007158471 |
| Paqr8         | 18.38242491 | -1.882869781 | 0.544731026 | -3.456512834 | 0.000547213 | 0.001452193 |
| Npnt          | 54.5717246  | -1.88312044  | 0.45001699  | -4.184554098 | 2.86E-05    | 9.40E-05    |
| Gap43         | 0.576065874 | -1.883314132 | 3.517391969 | -0.535429133 | 0.592353149 | NA          |
| Igdcc3        | 0.578531794 | -1.883320547 | 3.47936281  | -0.541283174 | 0.588312416 | NA          |
| 1810062G17Rik | 42.57362469 | -1.883531736 | 0.417935637 | -4.506750722 | 6.58E-06    | 2.39E-05    |
| Cdc42se2      | 480.9053864 | -1.883766575 | 0.214209302 | -8.794046552 | 1.44E-18    | 2.04E-17    |
| Tbx21         | 6.253046003 | -1.884100332 | 0.878271397 | -2.145237042 | 0.031933899 | 0.05694656  |
| Zfp202        | 48.38343461 | -1.884363891 | 0.34847624  | -5.407438654 | 6.39E-08    | 3.00E-07    |
| Gm7496        | 0.601342876 | -1.8851013   | 2.907309245 | -0.648400683 | 0.516725829 | NA          |
| C1ca4a        | 0.601657905 | -1.885727311 | 2.907063759 | -0.648670778 | 0.516551196 | NA          |
| Tm4sf4        | 4067.8844   | -1.886372136 | 0.24733683  | -7.626733692 | 2.41E-14    | 2.31E-13    |
| Map2          | 50.67433524 | -1.88659845  | 0.611714559 | -3.084115658 | 0.002041582 | 0.004817953 |
| Igfbp1        | 3.663587047 | -1.887264946 | 1.500968765 | -1.257364571 | 0.208621652 | 0.287247517 |
| Pcdhga7       | 7.860006126 | -1.887353862 | 0.793256002 | -2.379249394 | 0.017347935 | 0.03312585  |
| B3galt2       | 0.597178923 | -1.887600646 | 2.869680326 | -0.65777384  | 0.510683467 | NA          |
| Mxra8         | 247.3659606 | -1.888126873 | 0.310974704 | -6.071641355 | 1.27E-09    | 7.29E-09    |
| Gm12788       | 2.391618856 | -1.88818076  | 1.509581788 | -1.250797257 | 0.211008456 | 0.290102593 |
| H2al3         | 0.600338802 | -1.888234079 | 2.430169465 | -0.776996875 | 0.437160614 | NA          |
| Nat8f7        | 20.99357389 | -1.888693838 | 0.809474271 | -2.333235169 | 0.019635806 | 0.036989085 |

|               |             |              |             |                 |                |             |
|---------------|-------------|--------------|-------------|-----------------|----------------|-------------|
| Msrb3         | 453.2397736 | -1.889423116 | 0.225265438 | -8.387541092    | 4.96E-17       | 6.14E-16    |
| Mvb12b        | 181.5004142 | -1.88959154  | 0.343260934 | -5.504825488    | 3.70E-08       | 1.78E-07    |
| Lpcat1        | 109.6901169 | -1.890608289 | 0.29015861  | -6.515775247    | 7.23E-11       | 4.81E-10    |
| Batf2         | 15.13078196 | -1.890875676 | 0.681916651 | -2.77288386     | 0.005556195    | 0.011973456 |
| Ano1          | 65.0141928  | -1.890882618 | 0.374980687 | -5.042613349    | 4.59E-07       | 1.93E-06    |
| Setbp1        | 22.00853068 | -1.891178182 | 0.527451273 | -3.585503114    | 0.000336429    | 0.000925818 |
| Arhgef25      | 116.6745933 | -1.891705561 | 0.374568076 | -5.050365158    | 4.41E-07       | 1.86E-06    |
| Tmem249       | 1.392237358 | -1.892267023 | 1.711567105 | -1.105575714    | 0.268910207 NA |             |
| Gimap7        | 8.997025318 | -1.89253772  | 0.839509906 | -2.254336376    | 0.024175015    | 0.044463874 |
| Camkk1        | 14.55201259 | -1.892664949 | 0.676325133 | -2.798454258    | 0.005134784    | 0.011135708 |
| Creg2         | 5.812152009 | -1.893043875 | 0.945658442 | -2.00182623     | 0.045303424    | 0.077457905 |
| Abca5         | 236.3618382 | -1.893479919 | 0.227575833 | -8.320215268    | 8.78E-17       | 1.06E-15    |
| Dock10        | 224.7887845 | -1.8936593   | 0.252327151 | -7.504778202    | 6.15E-14       | 5.68E-13    |
| Maff          | 301.3382737 | -1.893876302 | 0.412349704 | -4.592888719    | 4.37E-06       | 1.62E-05    |
| Tcte3         | 2.301723601 | -1.893944791 | 2.030546194 | -0.932726769    | 0.35096106     | 0.443297336 |
| Aim2          | 74.12972951 | -1.894164868 | 0.344413945 | -5.499675308    | 3.80E-08       | 1.83E-07    |
| Tlr11         | 6.348461841 | -1.894576767 | 0.957227824 | -1.979232864    | 0.047789794    | 0.081228356 |
| Sync          | 6.889752522 | -1.894720828 | 0.84596708  | -2.23970988     | 0.025109764    | 0.045989606 |
| Dsccl         | 30.70421383 | -1.895258913 | 0.715485771 | -2.648912096    | 0.008075133    | 0.016769993 |
| Rtn4          | 2695.674203 | -1.896179385 | 0.206608737 | -9.177634083    | 4.41E-20       | 7.09E-19    |
| Klra7         | 3.282541662 | -1.896303217 | 1.225104546 | -1.547870525    | 0.121653472    | 0.182437403 |
| Rbl1          | 100.6879121 | -1.896804233 | 0.37452529  | -5.064555804    | 4.09E-07       | 1.73E-06    |
| Csnk2a3       | 2.351175057 | -1.897143184 | 1.661618087 | -1.141744423    | 0.25356027     | 0.338345673 |
| Gkn1          | 0.603538812 | -1.898311066 | 3.558070381 | -0.53352263     | 0.59367185 NA  |             |
| Lilra5        | 91.19962469 | -1.898646217 | 0.399984591 | -4.746798402    | 2.07E-06       | 7.97E-06    |
| Selenom       | 112.938112  | -1.898788147 | 0.366055105 | -5.187164782    | 2.14E-07       | 9.44E-07    |
| B3gnt9        | 39.27404939 | -1.899730228 | 0.448363767 | -4.237028877    | 2.26E-05       | 7.58E-05    |
| Jph2          | 9.956664019 | -1.900185012 | 0.909922649 | -2.088292904    | 0.036771421    | 0.064407602 |
| Lrrc36        | 0.606982046 | -1.900319774 | 2.427078444 | -0.782965948    | 0.433647109 NA |             |
| Vmn2r7        | 0.604550083 | -1.900500157 | 3.556804889 | -0.53432792     | 0.593114679 NA |             |
| Gm48349       | 2.404432629 | -1.900601336 | 1.621041437 | -1.172456973    | 0.241013637    | 0.324524168 |
| Tdg-ps        | 0.604801627 | -1.901043991 | 3.556490695 | -0.534528037    | 0.592976257 NA |             |
| Myo1h         | 3.022196256 | -1.901560784 | 1.521131258 | -1.250096449    | 0.211264317    | 0.290360696 |
| Smc2          | 128.4755437 | -1.902277481 | 0.415466255 | -4.578657008    | 4.68E-06       | 1.73E-05    |
| Fam49b        | 420.4542111 | -1.903278822 | 0.21350945  | -8.914260323    | 4.91E-19       | 7.22E-18    |
| Eid3          | 7.348563111 | -1.90384055  | 0.901070004 | -2.112866417    | 0.034612203    | 0.061058447 |
| Pcdhb8        | 2.374258346 | -1.903967504 | 1.662543113 | -1.145213913    | 0.252120556    | 0.33679292  |
| C130026i21Rik | 9.782941246 | -1.904473389 | 0.794513959 | -2.397029488    | 0.016528593    | 0.031740797 |
| Gm11633       | 0.610915372 | -1.904601226 | 2.900010555 | -0.656756653    | 0.5113374 NA   |             |
| Alpk1         | 163.3744755 | -1.904672311 | 0.230911326 | -8.248501047    | 1.60E-16       | 1.88E-15    |
| Ace2          | 35.97998864 | -1.90607694  | 0.719928164 | -2.64759324     | 0.0081067      | 0.016829399 |
| Cdc42ep1      | 1598.024197 | -1.906167282 | 0.22482497  | -8.478450072    | 2.28E-17       | 2.93E-16    |
| Gas2l3        | 143.635723  | -1.907217941 | 0.292681548 | -6.516358663    | 7.20E-11       | 4.80E-10    |
| Atp1a2        | 46.27537007 | -1.907341964 | 0.382332381 | -4.988701088    | 6.08E-07       | 2.52E-06    |
| Cul7          | 495.9024136 | -1.907542168 | 0.201869321 | -9.449391106    | 3.41E-21       | 6.00E-20    |
| Cthrc1        | 3.196268785 | -1.907551224 | 1.444468098 | -1.32059076     | 0.186637855    | 0.261768997 |
| Npas2         | 129.182093  | -1.908438311 | 0.341336163 | -5.591081516    | 2.26E-08       | 1.12E-07    |
| Unc5cl        | 11.5500923  | -1.908790998 | 1.159264333 | -1.646553718    | 0.09964981     | 0.153935299 |
| Havcr1        | 0.58121383  | -1.911060931 | 3.532381633 | -0.541012022    | 0.588499296 NA |             |
| Snai1         | 30.60583769 | -1.911225859 | 0.460699781 | -4.14852782     | 3.35E-05       | 0.000109012 |
| Alpi          | 8.774174948 | -1.912212707 | 3.381956947 | -0.565416041 NA | NA             |             |
| Cenps         | 10.45598936 | -1.912530034 | 0.920078    | -2.07866076     | 0.037648542    | 0.065781731 |
| Olfr120       | 0.585375669 | -1.912608889 | 2.886160915 | -0.662682694    | 0.507533796 NA |             |
| Cdhr1         | 0.585647637 | -1.9133098   | 2.885950489 | -0.662973882    | 0.507347281 NA |             |
| Rps27a-ps1    | 1.316909564 | -1.913454686 | 1.880258229 | -1.017655265    | 0.308841814 NA |             |
| Rtn           | 34.09681274 | -1.913779608 | 0.477217608 | -4.010287083    | 6.06E-05       | 0.000189632 |
| Nxn           | 60.06005835 | -1.914109147 | 0.345941983 | -5.533035129    | 3.15E-08       | 1.53E-07    |
| Gnb4          | 78.40781857 | -1.914378958 | 0.276624153 | -6.920505457    | 4.50E-12       | 3.43E-11    |
| Gm14226       | 90.89767003 | -1.915748333 | 0.407116648 | -4.7056497      | 2.53E-06       | 9.66E-06    |
| Inka1         | 15.01146256 | -1.915905303 | 0.652244825 | -2.937402077    | 0.003309747    | 0.00748833  |
| Olfr307       | 6.020544422 | -1.916085082 | 0.960730975 | -1.994403357    | 0.046107992    | 0.078722989 |
| Gm13255       | 0.597072263 | -1.916467731 | 3.443330632 | -0.556573834    | 0.577818635 NA |             |
| Qsox2         | 306.6518568 | -1.9165081   | 0.251140366 | -7.631222849    | 2.33E-14       | 2.24E-13    |
| Lgals1        | 1261.217028 | -1.916780198 | 0.267461955 | -7.166552698    | 7.69E-13       | 6.37E-12    |
| Ripor3        | 89.67396172 | -1.917301876 | 0.428147778 | -4.47813109     | 7.53E-06       | 2.71E-05    |
| Capn11        | 5.896006469 | -1.917763577 | 1.224162626 | -1.566592163    | 0.117210051    | 0.176862891 |

|              |             |              |             |              |                |             |
|--------------|-------------|--------------|-------------|--------------|----------------|-------------|
| Tcea2        | 68.22723711 | -1.918693829 | 0.556965517 | -3.444905958 | 0.000571258    | 0.001511064 |
| Pdlim7       | 407.7818037 | -1.919142889 | 0.194091208 | -9.887840421 | 4.70E-23       | 9.38E-22    |
| Fgf20        | 0.613843167 | -1.91968708  | 3.499984642 | -0.54848443  | 0.583359318 NA |             |
| Meis3        | 62.65506868 | -1.920083184 | 0.344844147 | -5.567973826 | 2.58E-08       | 1.27E-07    |
| Ntf3         | 10.39176686 | -1.920253809 | 0.769646874 | -2.494980325 | 0.012596411    | 0.024926712 |
| Tubb5        | 3210.113466 | -1.920396952 | 0.255196412 | -7.525172234 | 5.27E-14       | 4.90E-13    |
| Xyylt1       | 55.49581788 | -1.920559899 | 0.375152726 | -5.119408091 | 3.06E-07       | 1.32E-06    |
| Mlph         | 113.0422025 | -1.921492711 | 0.429511246 | -4.473672645 | 7.69E-06       | 2.76E-05    |
| Srd5a2       | 61.2169693  | -1.92449961  | 0.438235173 | -4.391476833 | 1.13E-05       | 3.94E-05    |
| Gm6223       | 0.615602381 | -1.924852348 | 3.586001908 | -0.536768356 | 0.591427632 NA |             |
| Rps17-ps1    | 0.615602381 | -1.924852348 | 3.586001908 | -0.536768356 | 0.591427632 NA |             |
| Gm14928      | 0.616222522 | -1.925639528 | 3.542479315 | -0.543585257 | 0.586726907 NA |             |
| Mybl2        | 70.04120083 | -1.926939807 | 0.457055198 | -4.215989262 | 2.49E-05       | 8.26E-05    |
| Mpped2       | 27.330207   | -1.926979282 | 0.612993275 | -3.143556972 | 0.001669079    | 0.004015022 |
| Glrp1        | 3.788606777 | -1.927391087 | 1.137500747 | -1.694408634 | 0.09018766     | 0.141537258 |
| Amotl1       | 207.3236571 | -1.927398708 | 0.331421712 | -5.815547489 | 6.04E-09       | 3.21E-08    |
| Gm12185      | 13.75498204 | -1.927904254 | 1.062422869 | -1.814629853 | 0.069580812    | 0.112543992 |
| Mex3d        | 107.6812976 | -1.927967701 | 0.274787877 | -7.016203634 | 2.28E-12       | 1.79E-11    |
| Srgn         | 265.0782821 | -1.928323122 | 0.198103038 | -9.733940176 | 2.16E-22       | 4.16E-21    |
| Mfsd6l       | 3.798750548 | -1.928999928 | 1.259628573 | -1.531403756 | 0.125669636    | 0.187536411 |
| Galnt3       | 25.33724161 | -1.929177922 | 0.644095677 | -2.995172909 | 0.002742893    | 0.006301151 |
| Nxf3         | 0.596705056 | -1.92970343  | 3.468054653 | -0.55642244  | 0.577922102 NA |             |
| Gldn         | 2.741889043 | -1.931232544 | 1.673472032 | -1.154027379 | 0.248488944    | 0.332540978 |
| Fndc3b       | 941.7613977 | -1.931741796 | 0.361095934 | -5.349663662 | 8.81E-08       | 4.07E-07    |
| 493343017Rik | 2.469011615 | -1.932164763 | 1.392895054 | -1.387157459 | 0.165393754    | 0.236209493 |
| Igkv9-123    | 0.593364788 | -1.93219536  | 2.427035572 | -0.796113325 | 0.42596617 NA  |             |
| Atp10d       | 199.556194  | -1.932732471 | 0.318706066 | -6.06431028  | 1.33E-09       | 7.61E-09    |
| Slc27a1      | 560.9000574 | -1.93365979  | 0.344490461 | -5.613101107 | 1.99E-08       | 9.94E-08    |
| Ccdc106      | 3.312929642 | -1.934058598 | 1.53873022  | -1.256918577 | 0.208783121    | 0.287429409 |
| Spin4        | 7.128034532 | -1.934138634 | 0.882577445 | -2.191466194 | 0.028418074    | 0.051315678 |
| Col4a4       | 40.88125264 | -1.934894907 | 0.43656069  | -4.432132697 | 9.33E-06       | 3.31E-05    |
| Ripk3        | 39.90301465 | -1.935183873 | 0.530498061 | -3.647862292 | 0.000264431    | 0.00074304  |
| Gm33312      | 0.633243809 | -1.935352364 | 2.495383176 | -0.77557322  | 0.438001018 NA |             |
| Platr25      | 36.21442008 | -1.935907685 | 0.402543502 | -4.809188754 | 1.52E-06       | 5.95E-06    |
| Olfr1415     | 0.621097888 | -1.936045551 | 3.536364781 | -0.547467716 | 0.584057444 NA |             |
| Sly          | 4.00357438  | -1.936289613 | 1.521572127 | -1.272558546 | 0.203174737    | 0.281055088 |
| Zfp579       | 756.3550224 | -1.937323838 | 0.24847811  | -7.796758573 | 6.35E-15       | 6.44E-14    |
| Samd4        | 199.7673471 | -1.937608665 | 0.230193907 | -8.417289116 | 3.85E-17       | 4.82E-16    |
| Tnip1        | 451.0577555 | -1.938587019 | 0.181798999 | -10.66335362 | 1.51E-26       | 3.99E-25    |
| Ucp2         | 1071.183805 | -1.93896466  | 0.25715505  | -7.540060586 | 4.70E-14       | 4.40E-13    |
| Fam71b       | 0.61530859  | -1.939001643 | 2.457775772 | -0.788925363 | 0.430155631 NA |             |
| Csf2rb       | 261.3479148 | -1.939918377 | 0.281948829 | -6.877786208 | 6.08E-12       | 4.56E-11    |
| Meox2        | 0.62858312  | -1.939404627 | 2.887002243 | -0.671771084 | 0.50172944 NA  |             |
| Tspyl5       | 19.30506839 | -1.939640011 | 0.546967044 | -3.546173454 | 0.000390869    | 0.001064462 |
| Ptchd1       | 0.684910611 | -1.941656506 | 2.727661223 | -0.711839319 | 0.476564282 NA |             |
| Tmem150b     | 16.22624316 | -1.941808741 | 0.600766429 | -3.232219126 | 0.001228328    | 0.00304634  |
| Ror1         | 193.986828  | -1.942788673 | 0.22600753  | -8.596123661 | 8.25E-18       | 1.09E-16    |
| Ly6e         | 8667.171092 | -1.944342263 | 0.128303988 | -15.15418412 | 7.11E-52       | 1.12E-49    |
| Gm16253      | 0.630943984 | -1.944365524 | 2.885397546 | -0.673863997 | 0.500397783 NA |             |
| Gm13136      | 0.638654119 | -1.945177848 | 2.493130487 | -0.780215018 | 0.435264324 NA |             |
| Slfn9        | 212.1006853 | -1.945853774 | 0.476974084 | -4.079579668 | 4.51E-05       | 0.000144064 |
| Gjd4         | 1.322508353 | -1.946032331 | 1.762062309 | -1.104406082 | 0.269417023 NA |             |
| Ppm1j        | 18.7437607  | -1.946251502 | 0.659557558 | -2.950844061 | 0.003169069    | 0.007197746 |
| Gm43802      | 7.234523223 | -1.946460128 | 1.303319632 | -1.493463368 | 0.135315936    | 0.199400647 |
| Gm7901       | 0.631991495 | -1.946495777 | 2.884677223 | -0.674770737 | 0.499821435 NA |             |
| Rps6-ps2     | 0.626239108 | -1.946646257 | 3.530197877 | -0.551426952 | 0.581341029 NA |             |
| Stk-ps2      | 0.631781885 | -1.947532559 | 2.920889785 | -0.666760029 | 0.504925428 NA |             |
| Gm12895      | 34.67472018 | -1.948401835 | 0.418600906 | -4.654557142 | 3.25E-06       | 1.22E-05    |
| Ift81        | 128.1884968 | -1.948516616 | 0.371748732 | -5.241488257 | 1.59E-07       | 7.16E-07    |
| Flvcr2       | 160.5844507 | -1.94863323  | 0.375531625 | -5.188999012 | 2.11E-07       | 9.36E-07    |
| Calhm2       | 35.30305436 | -1.949161822 | 0.407134587 | -4.787512253 | 1.69E-06       | 6.60E-06    |
| Clec2i       | 21.93824918 | -1.949318237 | 0.70581202  | -2.761809352 | 0.005748203    | 0.012341608 |
| Fam110a      | 108.467501  | -1.951387869 | 0.288895065 | -6.754659765 | 1.43E-11       | 1.03E-10    |
| Gm43517      | 0.628559806 | -1.951552549 | 3.527457882 | -0.553246166 | 0.580094858 NA |             |
| Lix1l        | 182.6090016 | -1.95156227  | 0.208758444 | -9.348423136 | 8.90E-21       | 1.52E-19    |
| Clba1        | 34.87322244 | -1.951935005 | 0.404297692 | -4.827964752 | 1.38E-06       | 5.46E-06    |

|                 |             |              |             |              |                |             |
|-----------------|-------------|--------------|-------------|--------------|----------------|-------------|
| Hap1            | 126.5098826 | -1.951997812 | 0.40636056  | -4.803610396 | 1.56E-06       | 6.11E-06    |
| Samd3           | 4.964222922 | -1.952027024 | 0.97868951  | -1.994531467 | 0.046094005    | 0.07870699  |
| Bmyc            | 293.4918262 | -1.952155944 | 0.286970107 | -6.802645637 | 1.03E-11       | 7.52E-11    |
| Ifi213          | 148.0971828 | -1.952173323 | 0.367918949 | -5.305987447 | 1.12E-07       | 5.12E-07    |
| Spats2          | 353.6968973 | -1.952789886 | 0.219076875 | -8.913719837 | 4.93E-19       | 7.25E-18    |
| Nfkb2           | 444.0751617 | -1.954277426 | 0.234745736 | -8.325081668 | 8.43E-17       | 1.02E-15    |
| Gm20871         | 0.617762411 | -1.955748048 | 2.815720485 | -0.694581745 | 0.487317456 NA |             |
| Dmrta2          | 2.72441596  | -1.956318946 | 1.379638549 | -1.417993827 | 0.156192567    | 0.225410216 |
| Xkr4            | 3.807970322 | -1.956470553 | 1.27774564  | -1.531189379 | 0.125722595    | 0.187582601 |
| Srsf12          | 4.361985181 | -1.956617034 | 1.140681104 | -1.715305906 | 0.086289156    | 0.136087486 |
| Tspan11         | 0.615919703 | -1.95666095  | 2.383701835 | -0.820849706 | 0.411731882 NA |             |
| Prkg1           | 7.532278714 | -1.956953129 | 0.907806489 | -2.155694139 | 0.031107556    | 0.055600924 |
| Amd-ps4         | 0.61698177  | -1.957203637 | 3.418183292 | -0.572585924 | 0.566925093 NA |             |
| Pycard          | 84.54420766 | -1.957470928 | 0.295076639 | -6.633771256 | 3.27E-11       | 2.26E-10    |
| Gm14756         | 0.594233151 | -1.958161398 | 3.58482781  | -0.546235831 | 0.584903839 NA |             |
| Gm14494         | 28.22607704 | -1.958614131 | 0.726008535 | -2.697783893 | 0.006980274    | 0.014698581 |
| Gm6493          | 16.20223607 | -1.959924917 | 0.689335072 | -2.843210792 | 0.004466152    | 0.009819314 |
| Cdc45           | 57.86585743 | -1.960754291 | 0.423766758 | -4.626965788 | 3.71E-06       | 1.39E-05    |
| Peg10           | 32.24628768 | -1.961652499 | 0.482211242 | -4.0680356   | 4.74E-05       | 0.000150768 |
| Gm7847          | 0.628377633 | -1.961865559 | 2.900787441 | -0.676321723 | 0.498836404 NA |             |
| Gm11196         | 1.368627618 | -1.962757078 | 2.096318895 | -0.936287452 | 0.349125207 NA |             |
| Kif2c           | 57.16619287 | -1.962944098 | 0.59698125  | -3.288116832 | 0.0010086      | 0.002541326 |
| Nynrin          | 63.81086655 | -1.963301343 | 0.626470119 | -3.133910596 | 0.001724934    | 0.004134803 |
| Tuba1b          | 2888.995119 | -1.963346888 | 0.318305017 | -6.168130521 | 6.91E-10       | 4.10E-09    |
| Nexn            | 57.38367978 | -1.964416896 | 0.395863066 | -4.962364682 | 6.96E-07       | 2.87E-06    |
| Lysmd2          | 30.7868569  | -1.964426882 | 0.49907167  | -3.936161879 | 8.28E-05       | 0.000254231 |
| Gm5640          | 8.382186828 | -1.964561418 | 1.015932615 | -1.933751697 | 0.053143664    | 0.088927482 |
| Ttc12           | 31.04832822 | -1.965373244 | 0.496696514 | -3.956889551 | 7.59E-05       | 0.000233958 |
| Tmem65          | 258.7411518 | -1.96554084  | 0.261406549 | -7.519095641 | 5.52E-14       | 5.12E-13    |
| Wee1            | 170.718551  | -1.966842985 | 0.2952498   | -6.661623432 | 2.71E-11       | 1.89E-10    |
| Pcdhgc5         | 6.105434995 | -1.967111132 | 0.967166291 | -2.033891522 | 0.041962534    | 0.072362662 |
| Gm9794          | 317.9439605 | -1.967255882 | 0.374486552 | -5.253208352 | 1.49E-07       | 6.73E-07    |
| Ldb3            | 10.19083885 | -1.968442152 | 0.710755357 | -2.769507303 | 0.005614115    | 0.012082998 |
| Gm7102          | 1.429271633 | -1.968609629 | 1.854859805 | -1.061325295 | 0.288542094 NA |             |
| Zfp521          | 19.86448815 | -1.969447513 | 0.755153474 | -2.608009604 | 0.00910704     | 0.018665162 |
| Cln6            | 143.0927934 | -1.970216435 | 0.24147808  | -8.158986681 | 3.38E-16       | 3.86E-15    |
| Socs5           | 186.9101819 | -1.970613449 | 0.242752208 | -8.117798258 | 4.75E-16       | 5.35E-15    |
| Gm5754          | 0.612311216 | -1.971671686 | 3.427550886 | -0.575242134 | 0.565127551 NA |             |
| Cyb561          | 275.2640834 | -1.97176341  | 0.267552891 | -7.369621031 | 1.71E-13       | 1.51E-12    |
| Prdm16          | 34.61597841 | -1.972256474 | 0.543154702 | -3.631113693 | 0.000282201    | 0.000787778 |
| Plcb2           | 94.21122873 | -1.972883595 | 0.344650065 | -5.724309371 | 1.04E-08       | 5.38E-08    |
| Tbc1d1          | 274.1081372 | -1.97290237  | 0.291052976 | -6.778499206 | 1.21E-11       | 8.81E-11    |
| Slc7a11         | 73.82559903 | -1.973488409 | 0.684502198 | -2.883100178 | 0.003937822    | 0.008753788 |
| Gm5127          | 0.624573379 | -1.97368904  | 2.803140244 | -0.704099285 | 0.481370946 NA |             |
| Hebp2           | 43.76481358 | -1.973918256 | 0.409894541 | -4.815673447 | 1.47E-06       | 5.79E-06    |
| Gm9795          | 0.635659799 | -1.974792154 | 2.895633372 | -0.681989707 | 0.49524546 NA  |             |
| Rhox4e          | 0.646141445 | -1.97503259  | 2.910744918 | -0.678531663 | 0.497434655 NA |             |
| Nrros           | 226.9931593 | -1.975247123 | 0.309436861 | -6.383360786 | 1.73E-10       | 1.10E-09    |
| Ptpdc1          | 66.21493943 | -1.975835463 | 0.315379382 | -6.264948113 | 3.73E-10       | 2.28E-09    |
| Gm19688         | 0.640919247 | -1.976198039 | 3.468347346 | -0.56978089  | 0.568826318 NA |             |
| Myl12a          | 3221.648488 | -1.976221628 | 0.160319201 | -12.32679316 | 6.50E-35       | 3.29E-33    |
| 2700081015Rik   | 188.2736833 | -1.976260934 | 0.370112411 | -5.339623518 | 9.31E-08       | 4.29E-07    |
| Trbv16          | 0.647187575 | -1.97639086  | 2.874355431 | -0.687594457 | 0.4917082 NA   |             |
| Ankrd45         | 2.31434118  | -1.976709497 | 1.518038227 | -1.302147379 | 0.19286601     | 0.268955397 |
| Klhdc1          | 19.98199957 | -1.976716319 | 0.998750991 | -1.979188343 | 0.047794805    | 0.081228774 |
| Gbp2            | 125.2387674 | -1.977533657 | 0.389286713 | -5.079889947 | 3.78E-07       | 1.61E-06    |
| Neur13          | 332.8429205 | -1.977539361 | 0.232535748 | -8.504238081 | 1.83E-17       | 2.37E-16    |
| Zfp677          | 32.33426617 | -1.977575186 | 0.520528519 | -3.799167796 | 0.000145183    | 0.000427474 |
| Klhl6           | 111.2010461 | -1.977613001 | 0.317604187 | -6.226659106 | 4.76E-10       | 2.87E-09    |
| Phactr2         | 249.9465433 | -1.977801947 | 0.205917753 | -9.604815125 | 7.63E-22       | 1.41E-20    |
| Arhgef10        | 265.7238471 | -1.978100521 | 0.318073002 | -6.219014207 | 5.00E-10       | 3.01E-09    |
| Adcy3           | 38.98337114 | -1.980080151 | 0.465087583 | -4.257434994 | 2.07E-05       | 6.95E-05    |
| Pheta2          | 7.890484985 | -1.980824607 | 0.827090558 | -2.394930747 | 0.016623505    | 0.031885408 |
| Olfr755-ps1     | 0.639277101 | -1.981731105 | 2.456086173 | -0.806865462 | 0.419743999 NA |             |
| 99301111J21Rik2 | 138.2729663 | -1.982446539 | 0.297209884 | -6.670190489 | 2.55E-11       | 1.78E-10    |
| Zfp286          | 2.513189219 | -1.982479502 | 1.5168951   | -1.306932498 | 0.191235638    | 0.267096932 |

|               |             |              |             |              |             |    |             |
|---------------|-------------|--------------|-------------|--------------|-------------|----|-------------|
| Gm7251        | 1.500270327 | -1.983673542 | 1.726843896 | -1.148727773 | 0.25066825  | NA |             |
| Nfe2l3        | 12.9710705  | -1.984179163 | 1.030992123 | -1.924533776 | 0.054287711 |    | 0.090546821 |
| Ubash3b       | 61.88753372 | -1.984352061 | 0.378995589 | -5.235818358 | 1.64E-07    |    | 7.37E-07    |
| Trim34b       | 5.305754936 | -1.984564693 | 0.998672501 | -1.987202702 | 0.046899939 |    | 0.079892528 |
| Gm10638       | 2.411398274 | -1.985420933 | 1.51477175  | -1.310706338 | 0.189956997 |    | 0.265681096 |
| Col6a2        | 249.383957  | -1.986100025 | 0.24593809  | -8.075609691 | 6.71E-16    |    | 7.47E-15    |
| Sema6a        | 196.8538111 | -1.987330035 | 0.462956226 | -4.292695343 | 1.77E-05    |    | 5.99E-05    |
| Lfng          | 96.64493051 | -1.987330499 | 0.3012152   | -6.59770988  | 4.18E-11    |    | 2.84E-10    |
| Gm6123        | 0.634501045 | -1.987843135 | 2.803664242 | -0.709016118 | 0.478314475 | NA |             |
| Olfr1305      | 4.807155377 | -1.988239165 | 1.084632736 | -1.833098983 | 0.066787852 |    | 0.108572452 |
| Gm13215       | 0.646626848 | -1.988901067 | 3.506729172 | -0.567167001 | 0.570600726 | NA |             |
| Rps27a-ps2    | 0.646728854 | -1.989107084 | 3.50661473  | -0.567244262 | 0.57054824  | NA |             |
| Sstr4         | 0.640819974 | -1.989281297 | 2.841531999 | -0.700073516 | 0.483881394 | NA |             |
| Rgs5          | 1038.092564 | -1.989671333 | 0.325818597 | -6.106684364 | 1.02E-09    |    | 5.93E-09    |
| Plscr3        | 546.805805  | -1.98973855  | 0.181824992 | -10.94315213 | 7.17E-28    |    | 2.11E-26    |
| Ctps2         | 522.3043182 | -1.990120031 | 0.267631349 | -7.436049762 | 1.04E-13    |    | 9.37E-13    |
| Padi3         | 0.630842831 | -1.99062638  | 2.799044806 | -0.711180606 | 0.476972325 | NA |             |
| Myh13         | 0.654929845 | -1.991568975 | 2.869252321 | -0.694107298 | 0.487614922 | NA |             |
| Clhc1         | 0.629621811 | -1.993015541 | 2.821923935 | -0.706261256 | 0.480025683 | NA |             |
| Alpm2         | 18.35640441 | -1.993665891 | 0.53529967  | -3.724392156 | 0.000195786 |    | 0.000563336 |
| Tmem159       | 77.55685461 | -1.994295342 | 0.340411621 | -5.858481955 | 4.67E-09    |    | 2.51E-08    |
| Prss23        | 168.066558  | -1.99447119  | 0.304042085 | -6.559852376 | 5.39E-11    |    | 3.64E-10    |
| Pole          | 157.846422  | -1.99467454  | 0.400248124 | -4.983594975 | 6.24E-07    |    | 2.58E-06    |
| Gpr27         | 1.39709613  | -1.994942705 | 2.101354418 | -0.949360416 | 0.342437335 | NA |             |
| P2ry10b       | 9.939451695 | -1.99503344  | 0.918175878 | -2.172822753 | 0.02979366  |    | 0.053448629 |
| Lpxn          | 93.90649519 | -1.99595453  | 0.260109799 | -7.673511176 | 1.67E-14    |    | 1.63E-13    |
| Ust           | 14.66420969 | -1.996449018 | 0.664453096 | -3.004650033 | 0.002658866 |    | 0.00612297  |
| Gm12499       | 0.640286445 | -1.998398295 | 2.799556025 | -0.713826863 | 0.475334247 | NA |             |
| Lamc1         | 953.9506245 | -2.000628746 | 0.2188342   | -9.142212438 | 6.12E-20    |    | 9.69E-19    |
| Fut7          | 3.39748289  | -2.001797278 | 1.271734159 | -1.57406897  | 0.115471505 |    | 0.174734442 |
| Stap1         | 49.47293077 | -2.001809322 | 0.411118967 | -4.869172878 | 1.12E-06    |    | 4.49E-06    |
| Nhsl2         | 49.27185022 | -2.001853853 | 0.436497875 | -4.586170901 | 4.51E-06    |    | 1.67E-05    |
| Higd1b        | 3.035153668 | -2.002325887 | 1.574667521 | -1.271586452 | 0.203520093 |    | 0.281487145 |
| Fam166b       | 2.44013732  | -2.004162058 | 1.758366553 | -1.139786272 | 0.254375354 |    | 0.339239368 |
| Dctd          | 21.50591307 | -2.004371624 | 0.723916272 | -2.768789292 | 0.005626501 |    | 0.012105072 |
| Large1        | 246.107233  | -2.004614691 | 0.269768786 | -7.430862247 | 1.08E-13    |    | 9.72E-13    |
| Wdr35         | 139.2714343 | -2.006409669 | 0.304786209 | -6.583006735 | 4.61E-11    |    | 3.13E-10    |
| Gm12896       | 17.44682991 | -2.007688969 | 0.555780721 | -3.612376058 | 0.000303404 |    | 0.000841594 |
| Opr1          | 0.650357872 | -2.008121383 | 2.885083701 | -0.696035745 | 0.486406445 | NA |             |
| Rhof          | 15.27066809 | -2.008392241 | 0.631967787 | -3.177997807 | 0.001482959 |    | 0.003608547 |
| Galnt6        | 45.76861446 | -2.008878316 | 0.389570425 | -5.156649966 | 2.51E-07    |    | 1.10E-06    |
| Pawr          | 421.8066748 | -2.009049319 | 0.307079159 | -6.542447632 | 6.05E-11    |    | 4.07E-10    |
| Ndst3         | 2.774126886 | -2.009694286 | 1.357627753 | -1.48029847  | 0.138793611 |    | 0.203750408 |
| Gpr35         | 57.7168743  | -2.009993164 | 0.530664398 | -3.787691753 | 0.000152053 |    | 0.000445856 |
| Srgap2        | 1271.694945 | -2.010612281 | 0.160270924 | -12.54508447 | 4.23E-36    |    | 2.34E-34    |
| Slc22a17      | 65.97543414 | -2.011479961 | 0.496382771 | -4.052275942 | 5.07E-05    |    | 0.000160487 |
| Best1         | 3.816118152 | -2.011794423 | 1.571476046 | -1.280194138 | 0.200476867 |    | 0.277841609 |
| Acsbg3        | 1.52905819  | -2.0119073   | 1.749049558 | -1.150286046 | 0.250026076 | NA |             |
| Wee2          | 0.621305813 | -2.012517267 | 2.851487028 | -0.70577816  | 0.480326106 | NA |             |
| Trpm2         | 194.1806278 | -2.012926383 | 0.333388932 | -6.037772077 | 1.56E-09    |    | 8.86E-09    |
| Gm8989        | 0.659110037 | -2.013455643 | 3.492822006 | -0.576455267 | 0.564307497 | NA |             |
| Tdrd5         | 0.657004395 | -2.013626384 | 2.449265515 | -0.822134788 | 0.411000188 | NA |             |
| Nkg7          | 20.72663831 | -2.01375234  | 0.577668486 | -3.485999993 | 0.000490301 |    | 0.001313015 |
| Tmem139       | 2.484744962 | -2.015003699 | 1.498224376 | -1.344927857 | 0.178648533 |    | 0.252432673 |
| Ifi2712b      | 334.3837179 | -2.015336568 | 0.362340794 | -5.561991915 | 2.67E-08    |    | 1.31E-07    |
| 1700088E04Rik | 25.07512999 | -2.015482263 | 0.522604701 | -3.856609519 | 0.000114971 |    | 0.000343986 |
| Mpzl1         | 235.6707932 | -2.017586039 | 0.212020042 | -9.516015635 | 1.80E-21    |    | 3.23E-20    |
| Fam78a        | 42.31910826 | -2.017838372 | 0.399497804 | -5.050937325 | 4.40E-07    |    | 1.85E-06    |
| Ppp1r36       | 9.867000733 | -2.018456987 | 0.888855043 | -2.270850577 | 0.023156025 |    | 0.042853226 |
| Qpct          | 439.1522558 | -2.01846564  | 0.227638793 | -8.866966883 | 7.52E-19    |    | 1.09E-17    |
| Shroom3       | 731.4649364 | -2.018872476 | 0.366797184 | -5.504056642 | 3.71E-08    |    | 1.79E-07    |
| Pard6b        | 373.9829491 | -2.020010762 | 0.182690897 | -11.05698639 | 2.03E-28    |    | 6.20E-27    |
| Gatm          | 300.838599  | -2.020753507 | 0.458250878 | -4.409710062 | 1.04E-05    |    | 3.64E-05    |
| Syce2         | 44.70903045 | -2.021495684 | 0.408002285 | -4.954618542 | 7.25E-07    |    | 2.98E-06    |
| Ahnak         | 1874.497957 | -2.022391898 | 0.227568809 | -8.886946798 | 6.28E-19    |    | 9.14E-18    |
| Pi16          | 11.72747263 | -2.022608689 | 0.766259889 | -2.639585755 | 0.008300742 |    | 0.017182012 |



|           |             |              |             |                |                |             |
|-----------|-------------|--------------|-------------|----------------|----------------|-------------|
| Il12rb2   | 4.196444806 | -2.022609708 | 1.214791627 | -1.664984893   | 0.09591577     | 0.148977045 |
| Cdc42ep2  | 105.4397632 | -2.023233891 | 0.313119132 | -6.461546684   | 1.04E-10       | 6.76E-10    |
| Sh3tc1    | 267.0001896 | -2.023673928 | 0.217361907 | -9.310159062   | 1.28E-20       | 2.14E-19    |
| Cdr2      | 51.11360076 | -2.025217494 | 0.416892939 | -4.857883895   | 1.19E-06       | 4.74E-06    |
| Hk1       | 131.7075463 | -2.025962979 | 0.232047099 | -8.730826597   | 2.53E-18       | 3.50E-17    |
| Plch2     | 1.448978833 | -2.026294365 | 1.704942244 | -1.188482702   | 0.234643291 NA |             |
| Drp2      | 16.61447262 | -2.026600664 | 0.753958695 | -2.687946539   | 0.007189291    | 0.015101408 |
| Hic2      | 148.4885033 | -2.027869015 | 0.364878848 | -5.557650229   | 2.73E-08       | 1.34E-07    |
| Gm45717   | 3.832034043 | -2.027908149 | 1.32465905  | -1.530890646   | 0.125796421    | 0.187676327 |
| Tuft1     | 979.3897842 | -2.028368525 | 0.336035477 | -6.036173755   | 1.58E-09       | 8.95E-09    |
| Id1       | 264.7561723 | -2.030688225 | 0.34623141  | -5.86511843    | 4.49E-09       | 2.42E-08    |
| Gm28929   | 0.667857653 | -2.030712157 | 2.407956123 | -0.843334369   | 0.399041466 NA |             |
| St3gal6   | 108.6204879 | -2.030895486 | 0.327415282 | -6.202812139   | 5.55E-10       | 3.32E-09    |
| Hdac9     | 43.56424664 | -2.031085498 | 0.508015316 | -3.998079261   | 6.39E-05       | 0.000199024 |
| Scarf2    | 269.9013021 | -2.031451694 | 0.334079724 | -6.080739268   | 1.20E-09       | 6.90E-09    |
| Ece2      | 3.019062864 | -2.031467868 | 1.293589815 | -1.570411148   | 0.11631949     | 0.175768009 |
| Susd2     | 88.36107643 | -2.032257025 | 0.317930462 | -6.392143145   | 1.64E-10       | 1.04E-09    |
| Rpl22-ps1 | 0.663764892 | -2.032393153 | 2.826062648 | -0.719160686   | 0.472041919 NA |             |
| Slc28a2   | 47.03062974 | -2.032515801 | 0.501919681 | -4.04948417    | 5.13E-05       | 0.000162353 |
| Chad      | 0.660423517 | -2.032560364 | 3.476155315 | -0.58471506    | 0.558739326 NA |             |
| Batf3     | 30.47009522 | -2.032674744 | 0.497597965 | -4.084973987   | 4.41E-05       | 0.000140916 |
| Hormad2   | 5.917227379 | -2.032807355 | 1.429441731 | -1.42209879 NA | NA             |             |
| Mboat2    | 8.679941201 | -2.032863906 | 0.867661743 | -2.342922138   | 0.019133376    | 0.036138465 |
| Dok3      | 189.9469382 | -2.032949442 | 0.222425959 | -9.139892882   | 6.25E-20       | 9.89E-19    |
| Cdca7     | 87.77832292 | -2.033112419 | 0.462903096 | -4.39209078    | 1.12E-05       | 3.93E-05    |
| Nes       | 83.55901536 | -2.034143227 | 0.362932742 | -5.604738817   | 2.09E-08       | 1.04E-07    |
| Msr1      | 285.3187893 | -2.03452524  | 0.398998905 | -5.09907475    | 3.41E-07       | 1.46E-06    |
| Gys1      | 91.54948713 | -2.035051139 | 0.339462574 | -5.994920487   | 2.04E-09       | 1.14E-08    |
| Gm11627   | 0.64066302  | -2.035929106 | 2.392422805 | -0.850990511   | 0.394774624 NA |             |
| Smo       | 539.7045556 | -2.035958077 | 0.221068454 | -9.209627323   | 3.27E-20       | 5.31E-19    |
| Actn3     | 1.935106598 | -2.036037867 | 1.61990447  | -1.256887616   | 0.208794333    | 0.287429409 |
| Mx1       | 142.3614614 | -2.037051562 | 0.490352746 | -4.154257483   | 3.26E-05       | 0.000106398 |
| Zik1      | 14.19481423 | -2.038155754 | 0.656110652 | -3.106420764   | 0.001893671    | 0.004500041 |
| Slit1     | 10.79093171 | -2.040731148 | 0.83788881  | -2.435563195   | 0.014868627    | 0.028866912 |
| Cip2a     | 98.98765084 | -2.040793467 | 0.479866273 | -4.25283789    | 2.11E-05       | 7.09E-05    |
| Gm4070    | 316.6248349 | -2.040996981 | 0.808701286 | -2.523795981   | 0.011609531    | 0.023210894 |
| Cpe       | 61.96208015 | -2.041219645 | 0.629001739 | -3.245173295   | 0.001173792    | 0.002922138 |
| Gdpd2     | 0.65027285  | -2.041624804 | 2.424620692 | -0.842038844   | 0.399766211 NA |             |
| Zfp449    | 37.2846746  | -2.042298244 | 0.460504652 | -4.434913387   | 9.21E-06       | 3.27E-05    |
| Hapln3    | 1.315145761 | -2.043360495 | 1.980018523 | -1.031990596   | 0.302076523 NA |             |
| Rtl5      | 51.34871497 | -2.044796627 | 0.541065439 | -3.779203921   | 0.000157331    | 0.000460104 |
| Igkv1-133 | 0.675405587 | -2.045347724 | 2.442622552 | -0.837357259   | 0.402391783 NA |             |
| Skap1     | 11.84406743 | -2.045867655 | 0.753366582 | -2.715633669   | 0.006614907    | 0.014003592 |
| Igkj2     | 0.695540512 | -2.046269983 | 2.764945017 | -0.740076193   | 0.459253763 NA |             |
| Aph1b     | 100.1686302 | -2.04656581  | 0.303617969 | -6.740595146   | 1.58E-11       | 1.13E-10    |
| Lrp8      | 15.68929588 | -2.047709632 | 0.660174116 | -3.101772065   | 0.00192366     | 0.004563039 |
| Trim60    | 0.639686831 | -2.047795748 | 2.394256867 | -0.855294925   | 0.392387896 NA |             |
| Gm7389    | 0.677999233 | -2.048148891 | 2.404902555 | -0.851655668   | 0.394405233 NA |             |
| Gm49196   | 0.672591637 | -2.049115013 | 2.820370576 | -0.726541055   | 0.467507149 NA |             |
| Ankle1    | 41.2295494  | -2.0497162   | 0.492074589 | -4.165458335   | 3.11E-05       | 0.000101675 |
| Podnl1    | 8.766886823 | -2.049847019 | 0.873886832 | -2.345666445   | 0.018993096    | 0.035901353 |
| Vav1      | 165.5772904 | -2.050321187 | 0.324175425 | -6.32472739    | 2.54E-10       | 1.58E-09    |
| Pkib      | 73.90073281 | -2.050707974 | 0.340573884 | -6.021330678   | 1.73E-09       | 9.77E-09    |
| Lipn      | 1.943766598 | -2.050953544 | 1.973369707 | -1.039315409   | 0.298658071    | 0.388177492 |
| Mfng      | 60.52023883 | -2.051188066 | 0.318803556 | -6.434018785   | 1.24E-10       | 8.03E-10    |
| Mtfr2     | 18.41764224 | -2.051246949 | 0.72127455  | -2.843919767   | 0.004456227    | 0.009800296 |
| Corin     | 5.429459169 | -2.051754581 | 1.247643171 | -1.644504318   | 0.100072073    | 0.154503596 |
| Csprs     | 76.68553982 | -2.052060995 | 0.454200544 | -4.517962431   | 6.24E-06       | 2.27E-05    |
| Hspa2     | 107.7478933 | -2.052073468 | 0.474328745 | -4.326268414   | 1.52E-05       | 5.20E-05    |
| Spry1     | 244.0150763 | -2.054028702 | 0.326100648 | -6.298756893   | 3.00E-10       | 1.85E-09    |
| Tmtc1     | 51.46157714 | -2.055224984 | 0.647648569 | -3.173364512   | 0.001506832    | 0.003657764 |
| Prkar1b   | 24.10847566 | -2.055246348 | 0.715144217 | -2.873890748   | 0.004054492    | 0.008996613 |
| Gm5586    | 0.671865215 | -2.055969608 | 2.778578192 | -0.739935847   | 0.459338922 NA |             |
| Hrct1     | 9.075935412 | -2.056001951 | 0.802742451 | -2.561222406   | 0.010430456    | 0.02108069  |
| Sptssb    | 5.793048455 | -2.057017588 | 1.448926174 | -1.419684194   | 0.155699642    | 0.224908277 |
| Gm8723    | 1.398171459 | -2.057972532 | 2.21726745  | -0.928157103   | 0.353326083 NA |             |

|           |             |              |              |              |                |             |          |
|-----------|-------------|--------------|--------------|--------------|----------------|-------------|----------|
| Inpp5j    | 5.920362667 | -2.05842789  | 1.035845872  | -1.987195147 | 0.046900775    | 0.079892528 |          |
| Klf7      | 353.710447  | -2.059151563 | 0.286283043  | -7.1927123   | 6.35E-13       | 5.32E-12    |          |
| Tnfsfm13  | 171.8850575 | -2.059289864 | 0.243047941  | -8.472772306 | 2.40E-17       | 3.06E-16    |          |
| Slc44a2   | 342.8781476 | -2.059305944 | 0.185491291  | -11.10190099 | 1.23E-28       | 3.81E-27    |          |
| Gm21983   | 13.28826012 | -2.060003411 | 2.841842484  | -0.724883037 | 0.468523788    | 0.559067232 |          |
| Angpt2    | 36.49480653 | -2.060328851 | 0.529201872  | -3.893275819 | 9.89E-05       | 0.000299421 |          |
| Mgarp     | 0.667866728 | -2.060515461 | 2.745738534  | -0.750441251 | 0.452988994 NA |             |          |
| Spaca6    | 294.3658312 | -2.060558796 | 0.342929764  | -6.008690437 | 1.87E-09       | 1.05E-08    |          |
| Mcf2l     | 81.23950224 | -2.060632687 | 0.443463968  | -4.646674446 | 3.37E-06       | 1.27E-05    |          |
| Nell1     | 0.639943394 | -2.060671947 | 3.581375547  | -0.575385608 | 0.565030535 NA |             |          |
| Gm9755    | 0.682582765 | -2.062073326 | 3.581329987  | -0.575784229 | 0.564761035 NA |             |          |
| Chrm3     | 75.38938058 | -2.062158599 | 0.53231087   | -3.873974242 | 0.000107075    | 0.000322169 |          |
| Hpcal1    | 350.8523487 | -2.062194051 | 0.190326717  | -10.8350214  | 2.35E-27       | 6.62E-26    |          |
| Ampd3     | 58.08697884 | -2.062444616 | 0.419597632  | -4.915291358 | 8.87E-07       | 3.60E-06    |          |
| Gm17841   | 0.680215134 | -2.063117547 | 2.815634121  | -0.732736378 | 0.463719232 NA |             |          |
| Mmp20     | 0.656859853 | -2.063514182 | 2.768436927  | -0.745371571 | 0.456047125 NA |             |          |
| Zbed4-ps1 | 0.681759364 | -2.064664601 | 2.814412483  | -0.733604123 | 0.463190048 NA |             |          |
| Tmem43    | 667.5455601 | -2.067172695 | 0.185370054  | -11.15160002 | 7.03E-29       | 2.23E-27    |          |
|           | 11-Sep      | 593.9566998  | -2.068485613 | 0.208579432  | -9.917016221   | 3.51E-23    | 7.14E-22 |
| Olfr410   | 0.653075879 | -2.069354386 | 2.388503752  | -0.866381049 | 0.386281233 NA |             |          |
| Kcnab1    | 25.08700772 | -2.069363598 | 0.621537376  | -3.329427446 | 0.000870247    | 0.002224284 |          |
| Sp110     | 171.0765874 | -2.070229557 | 0.412147442  | -5.023031436 | 5.09E-07       | 2.13E-06    |          |
| S1pr2     | 259.1394871 | -2.070429753 | 0.310051306  | -6.677700468 | 2.43E-11       | 1.70E-10    |          |
| Stk32b    | 10.76427672 | -2.071059289 | 0.9676503    | -2.140297263 | 0.032330751    | 0.057521879 |          |
| Lgsn      | 0.668804865 | -2.071120225 | 2.338309601  | -0.885733961 | 0.375760903 NA |             |          |
| Miga1     | 145.3735795 | -2.071274576 | 0.301701426  | -6.865312514 | 6.63E-12       | 4.96E-11    |          |
| Gm45925   | 0.667802295 | -2.071374781 | 3.356069501  | -0.617202588 | 0.537101109 NA |             |          |
| Setd7     | 472.9804482 | -2.073195595 | 0.162870651  | -12.72909257 | 4.08E-37       | 2.45E-35    |          |
| Zfyve28   | 16.16666293 | -2.073568224 | 0.704604672  | -2.94288174  | 0.003251726    | 0.007364877 |          |
| Gm614     | 1.452120721 | -2.073697385 | 1.854961691  | -1.117919251 | 0.263601482 NA |             |          |
| Ighv1-77  | 2.113896593 | -2.074725147 | 1.755070242  | -1.182132257 | 0.237153227    | 0.320312804 |          |
| Pdgfra    | 228.7336948 | -2.074876667 | 0.327794612  | -6.329807116 | 2.45E-10       | 1.54E-09    |          |
| Thbs3     | 42.80441767 | -2.075128266 | 0.573399623  | -3.618991332 | 0.000295754    | 0.000822245 |          |
| Gm14137   | 3.924561532 | -2.076360739 | 1.378522411  | -1.506221969 | 0.132010202    | 0.195462663 |          |
| Iqub      | 0.687970451 | -2.076774772 | 2.810835186  | -0.738846156 | 0.460000421 NA |             |          |
| Olfr1454  | 0.687979537 | -2.076792402 | 2.810829861  | -0.738853828 | 0.459995762 NA |             |          |
| Tekt1     | 1.448219507 | -2.077010925 | 1.82141828   | -1.140326166 | 0.254150441 NA |             |          |
| Gm47605   | 0.678763115 | -2.077068845 | 3.580845164  | -0.58004989  | 0.561880974 NA |             |          |
| Tfcp2l1   | 347.1996946 | -2.077983232 | 0.2411521    | -8.616898773 | 6.88E-18       | 9.21E-17    |          |
| Gm12254   | 0.673038268 | -2.078415336 | 3.350629766  | -0.620305877 | 0.535056426 NA |             |          |
| Trdv4     | 0.649832535 | -2.079204487 | 2.823478697  | -0.736398149 | 0.461488431 NA |             |          |
| Syk       | 200.2085913 | -2.079402674 | 0.22822279   | -9.111284089 | 8.14E-20       | 1.28E-18    |          |
| Gm48981   | 0.689159156 | -2.080265707 | 2.860290234  | -0.727291826 | 0.467047204 NA |             |          |
| Tmem156   | 8.077142718 | -2.080328535 | 0.818425854  | -2.541865612 | 0.011026256    | 0.022159096 |          |
| Penk      | 2.42860494  | -2.080461551 | 1.433075438  | -1.451746011 | 0.146572241    | 0.213615959 |          |
| Cachd1    | 56.46242562 | -2.081211745 | 0.422660273  | -4.924077039 | 8.48E-07       | 3.46E-06    |          |
| Smtn      | 214.2340516 | -2.081311614 | 0.267493472  | -7.780794051 | 7.21E-15       | 7.28E-14    |          |
| Rftn2     | 29.37956952 | -2.08138402  | 0.571385321  | -3.642697746 | 0.000269796    | 0.000756493 |          |
| Olfr183   | 0.674891496 | -2.081751955 | 3.348702338  | -0.621659301 | 0.534165919 NA |             |          |
| Slco1a5   | 0.683612208 | -2.081910329 | 3.3630574    | -0.619052868 | 0.535881531 NA |             |          |
| Olfr1200  | 0.697770425 | -2.082699223 | 2.434760967  | -0.855401927 | 0.392328677 NA |             |          |
| Nucb2     | 348.779858  | -2.083356615 | 0.302609782  | -6.88463077  | 5.79E-12       | 4.36E-11    |          |
| Afap1     | 126.1512977 | -2.083440968 | 0.278242033  | -7.487872859 | 7.00E-14       | 6.42E-13    |          |
| Stac2     | 3.652424802 | -2.083631334 | 1.454624919  | -1.432418287 | 0.152024148    | 0.220378936 |          |
| Stk17b    | 216.0772798 | -2.083710265 | 0.375831441  | -5.544268086 | 2.95E-08       | 1.44E-07    |          |
| Nkain2    | 7.116871168 | -2.083807212 | 0.931468528  | -2.237120364 | 0.025278474    | 0.046268781 |          |
| Wls       | 203.4523689 | -2.084622937 | 0.307181352  | -6.786293916 | 1.15E-11       | 8.37E-11    |          |
| Rem1      | 15.66378261 | -2.085268098 | 0.797959464  | -2.613250664 | 0.00896855     | 0.018403447 |          |
| Tspan32   | 39.11514398 | -2.085711028 | 0.539398623  | -3.866734063 | 0.000110303    | 0.000331063 |          |
| Tmem132c  | 1.496512147 | -2.086277371 | 2.041689034  | -1.021838946 | 0.306857133 NA |             |          |
| Cyp2b9    | 12.81936949 | -2.088022504 | 1.062945287  | -1.964374394 | 0.049486669    | 0.083620685 |          |
| Jade2     | 420.0125771 | -2.089870785 | 0.353183848  | -5.917232046 | 3.27E-09       | 1.80E-08    |          |
| H2bc7     | 0.704102244 | -2.092289159 | 2.396720767  | -0.872979943 | 0.38267401 NA  |             |          |
| Fscn1     | 141.625044  | -2.093448995 | 0.345566527  | -6.058020176 | 1.38E-09       | 7.89E-09    |          |
| Camk2a    | 9.742805877 | -2.094473791 | 0.848294139  | -2.469041923 | 0.013547535    | 0.02656526  |          |
| Trim69    | 1.510333532 | -2.096975336 | 1.684774407  | -1.244662387 | 0.213255877 NA |             |          |



|               |             |              |             |              |                |             |
|---------------|-------------|--------------|-------------|--------------|----------------|-------------|
| Gm21451       | 17.01940122 | -2.09942186  | 0.679036526 | -3.091765729 | 0.001989698    | 0.004704629 |
| Hells         | 127.4818282 | -2.099530419 | 0.427454347 | -4.911706786 | 9.03E-07       | 3.67E-06    |
| Amh           | 1.478697133 | -2.100266087 | 1.870433649 | -1.122876553 | 0.261489927 NA |             |
| Slc7a8        | 147.8132334 | -2.101198027 | 0.357109552 | -5.88390318  | 4.01E-09       | 2.17E-08    |
| Fancd2        | 38.67073452 | -2.102987038 | 0.556888829 | -3.77631392  | 0.000159166    | 0.000465113 |
| Gm4130        | 0.692025359 | -2.104403341 | 2.360553262 | -0.891487337 | 0.372667782 NA |             |
| Nt5c3b        | 163.138114  | -2.104961196 | 0.253759977 | -8.295087446 | 1.09E-16       | 1.29E-15    |
| Rnf208        | 6.533644836 | -2.105561894 | 0.966130079 | -2.179377229 | 0.029303656    | 0.052663792 |
| Gpr132        | 39.73166483 | -2.105719642 | 0.49927209  | -4.217579323 | 2.47E-05       | 8.21E-05    |
| Rasgrp1       | 65.68143293 | -2.106090942 | 0.464000432 | -4.538984873 | 5.65E-06       | 2.07E-05    |
| Etl4          | 765.0923071 | -2.108249447 | 0.173386475 | -12.15924968 | 5.12E-34       | 2.44E-32    |
| Sarm1         | 46.98289498 | -2.108679127 | 0.674753835 | -3.125108767 | 0.001777393    | 0.00424979  |
| Plet1         | 158.8527853 | -2.10905051  | 0.447793141 | -4.709876765 | 2.48E-06       | 9.47E-06    |
| Gm16073       | 1.473909198 | -2.109643204 | 1.816162719 | -1.161593717 | 0.245400535 NA |             |
| Fat4          | 59.86018291 | -2.111271455 | 0.434960636 | -4.853936837 | 1.21E-06       | 4.83E-06    |
| Traf3ip3      | 48.46225292 | -2.11169584  | 0.467251626 | -4.519397518 | 6.20E-06       | 2.26E-05    |
| Cd80          | 9.650459359 | -2.112103562 | 0.764154758 | -2.76397358  | 0.005710216    | 0.012269696 |
| Dse           | 287.7814095 | -2.112640147 | 0.360794416 | -5.855523412 | 4.76E-09       | 2.55E-08    |
| Kitl          | 134.9841845 | -2.112818806 | 0.306073054 | -6.902988613 | 5.09E-12       | 3.86E-11    |
| Epb4112       | 645.712091  | -2.11303769  | 0.206169288 | -10.24904197 | 1.20E-24       | 2.74E-23    |
| Lefty1        | 20.45536161 | -2.113551414 | 0.547172877 | -3.862675771 | 0.000112152    | 0.000336199 |
| Dpysl4        | 29.28604922 | -2.113898422 | 0.619116699 | -3.414377975 | 0.000639278    | 0.001675133 |
| Fbxw10        | 4.425673637 | -2.114956811 | 1.00719721  | -2.099843794 | 0.035742584    | 0.062766747 |
| Hspa12a       | 81.01330434 | -2.116712095 | 0.386635741 | -5.47469329  | 4.38E-08       | 2.09E-07    |
| Smox          | 164.6161327 | -2.1170975   | 0.320148804 | -6.612854622 | 3.77E-11       | 2.58E-10    |
| 1700007E05Rik | 0.691002622 | -2.11729895  | 2.330435057 | -0.908542353 | 0.363591748 NA |             |
| Itm2c         | 1457.643485 | -2.118066934 | 0.232311526 | -9.117356207 | 7.70E-20       | 1.21E-18    |
| Agrn          | 3775.665237 | -2.118558065 | 0.221196784 | -9.577707373 | 9.92E-22       | 1.83E-20    |
| Col16a1       | 273.3914168 | -2.11923725  | 0.409264681 | -5.178158167 | 2.24E-07       | 9.86E-07    |
| Mypbc3        | 1.456976803 | -2.11984726  | 1.917490007 | -1.105532363 | 0.268928979 NA |             |
| Igkv4-78      | 0.675978975 | -2.120034019 | 2.746048644 | -0.772030759 | 0.44009621 NA  |             |
| Abca9         | 170.6175485 | -2.120190568 | 0.265085905 | -7.998126389 | 1.26E-15       | 1.38E-14    |
| Ly6g6d        | 6.167826452 | -2.120388992 | 1.142460978 | -1.855983734 | 0.063455877    | 0.103759427 |
| Eih3          | 129.0890085 | -2.121270943 | 0.282329315 | -7.513463294 | 5.76E-14       | 5.33E-13    |
| 2200002J24Rik | 1.97103519  | -2.122265073 | 1.807222027 | -1.174324483 | 0.24026508     | 0.323695202 |
| Bmf           | 387.6777693 | -2.122552385 | 0.25649981  | -8.275064152 | 1.28E-16       | 1.53E-15    |
| AC147806.2    | 3.960079671 | -2.123005309 | 1.586471736 | -1.33819296  | 0.180833543    | 0.254823132 |
| Gm13146       | 0.696073243 | -2.123179169 | 2.738938795 | -0.775183138 | 0.438231451 NA |             |
| Etv1          | 27.30616845 | -2.123318727 | 0.666424278 | -3.186136514 | 0.001441865    | 0.003520595 |
| Pcdhb13       | 1.493099005 | -2.123778998 | 1.839121406 | -1.15477912  | 0.24818089 NA  |             |
| Itda11        | 9.310395942 | -2.124578855 | 0.901575133 | -2.356518916 | 0.018447128    | 0.034966271 |
| Ccdc158       | 64.39990771 | -2.124861552 | 0.579782182 | -3.664930757 | 0.000247406    | 0.000698838 |
| Ephx4         | 4.994154643 | -2.125458742 | 1.178766733 | -1.803120739 | 0.071369255    | 0.115054662 |
| Foxp3         | 4.053669442 | -2.125694575 | 1.25276136  | -1.696807264 | 0.089733105    | 0.140888743 |
| Adam33        | 152.291612  | -2.1265239   | 0.548499385 | -3.876985024 | 0.000105759    | 0.000318378 |
| Fbxo41        | 0.703985019 | -2.126575761 | 2.724634243 | -0.780499535 | 0.435096901 NA |             |
| Gm42517       | 10.90747886 | -2.126586374 | 0.978714422 | -2.172836455 | 0.029792628    | 0.053448629 |
| Slc22a29      | 28.68395011 | -2.126721831 | 0.719176907 | -2.957160901 | 0.003104861    | 0.007063205 |
| Kctd11        | 105.8098743 | -2.126732823 | 0.285344415 | -7.45321341  | 9.11E-14       | 8.28E-13    |
| Vsig8         | 0.676543349 | -2.126916459 | 2.805328333 | -0.758170241 | 0.448349074 NA |             |
| Card10        | 1093.782166 | -2.126980574 | 0.186535982 | -11.40252167 | 4.06E-30       | 1.45E-28    |
| Shank2        | 1288.668595 | -2.127198605 | 0.318252592 | -6.683994589 | 2.33E-11       | 1.63E-10    |
| Garnl3        | 39.16945089 | -2.128649304 | 0.542009394 | -3.927329172 | 8.59E-05       | 0.000262848 |
| Pate2         | 1.259806512 | -2.128774484 | 2.221949654 | -0.95806603  | 0.338029463 NA |             |
| Ankrd13b      | 356.742683  | -2.129141525 | 0.280572577 | -7.588558883 | 3.23E-14       | 3.08E-13    |
| C1qtnf7       | 35.10252481 | -2.129283286 | 0.475812182 | -4.47504996  | 7.64E-06       | 2.74E-05    |
| 3110067C02Rik | 2.756357821 | -2.131602954 | 1.43430478  | -1.486157603 | 0.137237439    | 0.201883153 |
| Kcnj8         | 144.0106392 | -2.131784429 | 0.35655947  | -5.978762611 | 2.25E-09       | 1.25E-08    |
| Col8a2        | 24.00787546 | -2.132189493 | 0.624624699 | -3.413552963 | 0.000641217    | 0.001679955 |
| Zfp618        | 299.2641694 | -2.132399625 | 0.978012547 | -2.180339744 | 0.029232287    | 0.05256878  |
| Ifi206        | 44.11120714 | -2.132403165 | 0.577588777 | -3.691905472 | 0.00022258     | 0.000634116 |
| Anxa1         | 175.0783554 | -2.133679448 | 0.289988469 | -7.357807909 | 1.87E-13       | 1.64E-12    |
| Sspn          | 43.79609794 | -2.133971686 | 0.425574452 | -5.014332217 | 5.32E-07       | 2.22E-06    |
| Ttc28         | 78.77361961 | -2.136335632 | 0.290107139 | -7.363954007 | 1.79E-13       | 1.57E-12    |
| Parvb         | 102.6589607 | -2.1364138   | 0.328051665 | -6.512430899 | 7.39E-11       | 4.91E-10    |
| Colca2        | 21.43478192 | -2.136802511 | 0.691467899 | -3.090241086 | 0.001999941    | 0.004726881 |

|               |             |              |             |              |                |             |
|---------------|-------------|--------------|-------------|--------------|----------------|-------------|
| Antxr1        | 80.44606206 | -2.137596879 | 0.47612336  | -4.489586229 | 7.14E-06       | 2.57E-05    |
| Zeb2          | 308.8344738 | -2.138013676 | 0.27226885  | -7.852582752 | 4.08E-15       | 4.22E-14    |
| Apobr         | 75.56091699 | -2.138019025 | 0.302697525 | -7.063219383 | 1.63E-12       | 1.30E-11    |
| Gm15784       | 0.713261043 | -2.138027847 | 2.316068214 | -0.923128185 | 0.355940408 NA |             |
| Sema3f        | 230.8986467 | -2.13952075  | 0.307529823 | -6.957116322 | 3.47E-12       | 2.67E-11    |
| Reep2         | 12.99300417 | -2.139645028 | 0.747953279 | -2.860666686 | 0.004227513    | 0.009347683 |
| Gm16574       | 11.08787122 | -2.140107136 | 0.741450043 | -2.886380755 | 0.003897004    | 0.008674255 |
| B3galnt1      | 31.37784935 | -2.140461829 | 0.432730267 | -4.946411179 | 7.56E-07       | 3.10E-06    |
| Abhd12b       | 3.273540396 | -2.141611819 | 1.295749341 | -1.652797923 | 0.098371997    | 0.152251094 |
| Dnajc6        | 2.799521605 | -2.141632285 | 1.42167461  | -1.506415231 | 0.131960613    | 0.195419087 |
| Tns4          | 21.7182201  | -2.142343571 | 0.807953423 | -2.651568162 | 0.008011894    | 0.016650831 |
| Bag2          | 120.0753782 | -2.143397451 | 0.377302613 | -5.680844439 | 1.34E-08       | 6.83E-08    |
| Olfr728       | 0.715845289 | -2.143432336 | 2.353374826 | -0.910790883 | 0.362405567 NA |             |
| Sic7a1        | 89.19617768 | -2.143433673 | 0.540794453 | -3.963490494 | 7.39E-05       | 0.000228115 |
| Card11        | 27.11050148 | -2.144641562 | 0.529670525 | -4.049010584 | 5.14E-05       | 0.000162622 |
| Pcdhga1       | 5.039302691 | -2.147846679 | 1.179753958 | -1.820588662 | 0.068669408    | 0.111312738 |
| Kifc5b        | 39.76460433 | -2.148636551 | 0.566289037 | -3.794240064 | 0.000148096    | 0.000435318 |
| Gm8806        | 0.72039942  | -2.148941382 | 2.314052782 | -0.928648387 | 0.353071337 NA |             |
| AW551984      | 0.70055626  | -2.149955661 | 2.82500683  | -0.761044412 | 0.446630541 NA |             |
| Blnk          | 66.87228024 | -2.149955978 | 0.426283366 | -5.043490197 | 4.57E-07       | 1.93E-06    |
| Ccr7          | 9.76311171  | -2.149972162 | 0.922169249 | -2.331429035 | 0.019730748    | 0.037143307 |
| P3h4          | 52.61324435 | -2.151006011 | 0.521369629 | -4.125683379 | 3.70E-05       | 0.000119665 |
| Cd3g          | 24.80224949 | -2.151735789 | 0.775673012 | -2.774024307 | 0.005536754    | 0.011934579 |
| Heg1          | 646.8291381 | -2.151758484 | 0.185076599 | -11.62631309 | 3.03E-31       | 1.18E-29    |
| Bfsp2         | 0.718584236 | -2.152825351 | 2.716963962 | -0.792364338 | 0.428148267 NA |             |
| 1700025G04Rik | 101.2738286 | -2.153087315 | 0.329511668 | -6.534176245 | 6.40E-11       | 4.29E-10    |
| Ttn           | 18.70141984 | -2.153676038 | 1.173569658 | -1.835149727 | 0.066483508    | 0.108149889 |
| Gm7382        | 0.723421246 | -2.154054987 | 2.313327972 | -0.931149847 | 0.351776057 NA |             |
| Ikzf4         | 82.54397402 | -2.15407784  | 0.332636144 | -6.47577806  | 9.43E-11       | 6.18E-10    |
| B230217C12Rik | 12.11822187 | -2.154352164 | 0.734068796 | -2.934809618 | 0.003337524    | 0.007545168 |
| Mmp28         | 12.96914297 | -2.155352107 | 0.652366333 | -3.303898435 | 0.000953504    | 0.002416431 |
| Dynlt1a       | 54.73593089 | -2.155745328 | 0.394314739 | -5.467067584 | 4.58E-08       | 2.18E-07    |
| Myo1c         | 1607.943313 | -2.155879923 | 0.266173943 | -8.099515297 | 5.52E-16       | 6.18E-15    |
| Nfe2          | 31.62433329 | -2.157716882 | 0.513006779 | -4.206020214 | 2.60E-05       | 8.60E-05    |
| Gm16379       | 0.727357443 | -2.159758496 | 2.792426169 | -0.773434413 | 0.43926533 NA  |             |
| Plekho1       | 291.8770954 | -2.160119112 | 0.238198873 | -9.068553039 | 1.21E-19       | 1.86E-18    |
| Rasgrp3       | 232.6062332 | -2.161496933 | 0.427584408 | -5.055135064 | 4.30E-07       | 1.82E-06    |
| Pdpx          | 11.20319446 | -2.161556133 | 0.878192686 | -2.461368862 | 0.013840799    | 0.027084244 |
| Fgfr3         | 2948.840678 | -2.16219962  | 0.355119782 | -6.088648761 | 1.14E-09       | 6.60E-09    |
| Sms-ps        | 16.20142317 | -2.162449424 | 0.850444995 | -2.542726969 | 0.010999114    | 0.022114978 |
| Trbj2-4       | 0.727469498 | -2.164829753 | 2.815051206 | -0.769019671 | 0.441881633 NA |             |
| Sgce          | 209.034796  | -2.164903081 | 0.452130088 | -4.788230507 | 1.68E-06       | 6.58E-06    |
| Wfdc18        | 10.1338343  | -2.165367671 | 1.10061459  | -1.967416833 | 0.049135175    | 0.083119223 |
| Gm13363       | 0.731032839 | -2.165548804 | 2.753689443 | -0.786417223 | 0.431623097 NA |             |
| Pdxd4         | 12.31818431 | -2.165654964 | 0.722116905 | -2.999036513 | 0.002708348    | 0.006228507 |
| Sic25a43      | 18.60910971 | -2.166202557 | 0.563781535 | -3.842272977 | 0.0001219      | 0.00036268  |
| Gm17654       | 0.726321762 | -2.16632236  | 3.412798443 | -0.634764225 | 0.525582199 NA |             |
| Smim31        | 0.731245548 | -2.166460848 | 2.790372625 | -0.77640557  | 0.437509557 NA |             |
| Mybl1         | 48.84130328 | -2.166782197 | 0.582950287 | -3.716924491 | 0.000201663    | 0.000578779 |
| Osgin2        | 76.39136891 | -2.167010822 | 0.353246745 | -6.134552831 | 8.54E-10       | 5.02E-09    |
| Gm5739        | 0.726787466 | -2.167168888 | 3.412374876 | -0.635091092 | 0.525369006 NA |             |
| Tubb4a        | 13.36080083 | -2.168630203 | 0.70481229  | -3.076890451 | 0.002091722    | 0.00492673  |
| Dennd1c       | 117.1639908 | -2.169525625 | 0.297414776 | -7.29461277  | 3.00E-13       | 2.58E-12    |
| Sic7a6        | 65.28917144 | -2.169635425 | 0.41993541  | -5.166593183 | 2.38E-07       | 1.04E-06    |
| Gm17359       | 5.694246351 | -2.169881583 | 1.092591328 | -1.985995611 | 0.047033811    | 0.080095137 |
| H2-M5         | 5.077845058 | -2.170128061 | 1.160938137 | -1.869288287 | 0.061582717    | 0.101104131 |
| Cd300ld2      | 0.69779758  | -2.170706648 | 2.362786426 | -0.918706246 | 0.358249242 NA |             |
| Pcdh7         | 49.66683379 | -2.171506371 | 0.458283759 | -4.738344591 | 2.15E-06       | 8.30E-06    |
| Gm5431        | 45.9222037  | -2.173651106 | 0.463693011 | -4.68769435  | 2.76E-06       | 1.05E-05    |
| Igsf8         | 460.5145268 | -2.173792907 | 0.203696195 | -10.67174035 | 1.38E-26       | 3.66E-25    |
| Bcl2l11       | 326.0579418 | -2.174224169 | 0.319142003 | -6.812717068 | 9.58E-12       | 7.05E-11    |
| Asns          | 188.6213392 | -2.174411684 | 0.486965401 | -4.46522829  | 8.00E-06       | 2.86E-05    |
| Magohb        | 123.0915741 | -2.174904742 | 0.411704995 | -5.282677575 | 1.27E-07       | 5.77E-07    |
| Gm8355        | 0.713436786 | -2.175208687 | 2.67041715  | -0.814557638 | 0.415325567 NA |             |
| Map3k14       | 171.7762552 | -2.175580895 | 0.248885916 | -8.741277646 | 2.30E-18       | 3.21E-17    |
| Smim38        | 6.35862902  | -2.175711796 | 1.2451038   | -1.747413988 | 0.080565553    | 0.127991944 |

|               |             |              |             |              |                |             |
|---------------|-------------|--------------|-------------|--------------|----------------|-------------|
| Glt8d2        | 4.237477005 | -2.175966434 | 1.19397495  | -1.822455683 | 0.068385872    | 0.110916407 |
| Gm20900       | 1.532287424 | -2.177763935 | 1.703227892 | -1.278609835 | 0.201034485 NA |             |
| Tspan6        | 20.02117664 | -2.178566428 | 0.640080118 | -3.403583968 | 0.00066508     | 0.001733417 |
| Gm17994       | 0.739519797 | -2.179240715 | 2.309360569 | -0.943655462 | 0.34534574 NA  |             |
| Tgtp2         | 62.57411615 | -2.179608774 | 0.69573414  | -3.132818484 | 0.001731365    | 0.004148462 |
| Tmem117       | 5.883722518 | -2.18014584  | 1.10526756  | -1.972505046 | 0.048551981    | 0.082335041 |
| Gm7482        | 0.746696493 | -2.180309482 | 2.38897748  | -0.912653845 | 0.361424626 NA |             |
| Gm5879        | 0.729682458 | -2.181257729 | 3.295469635 | -0.661895866 | 0.508037961 NA |             |
| Tinagl1       | 925.6566509 | -2.181291956 | 0.330925709 | -6.591485325 | 4.35E-11       | 2.96E-10    |
| Gpr63         | 5.389109094 | -2.18171925  | 1.404625703 | -1.553238877 | 0.120366077    | 0.180856767 |
| Ptprq         | 1.493098756 | -2.181755216 | 2.560075181 | -0.852223104 | 0.394090276 NA |             |
| Ccdc7b        | 0.739982281 | -2.181799095 | 2.785931782 | -0.783148787 | 0.433539745 NA |             |
| Gm19139       | 0.747230827 | -2.182959072 | 2.424137082 | -0.900509747 | 0.36784904 NA  |             |
| Tmem231       | 39.21453411 | -2.183743256 | 0.456477863 | -4.783897387 | 1.72E-06       | 6.71E-06    |
| Prkx          | 210.6391881 | -2.187386265 | 0.236748272 | -9.239291345 | 2.48E-20       | 4.07E-19    |
| Kcnh3         | 6.301135729 | -2.188459908 | 1.401864581 | -1.561106499 | 0.118498625    | 0.178475533 |
| Tmem98        | 454.0923232 | -2.189495455 | 0.261356343 | -8.377433768 | 5.41E-17       | 6.66E-16    |
| A630001G21Rik | 59.15591906 | -2.190060588 | 0.368494631 | -5.943263217 | 2.79E-09       | 1.54E-08    |
| lfi204        | 259.5297262 | -2.190160114 | 0.34502553  | -6.347820456 | 2.18E-10       | 1.38E-09    |
| Cdc25a        | 251.3801016 | -2.190207887 | 0.264720007 | -8.273677197 | 1.30E-16       | 1.54E-15    |
| Gm12033       | 0.738722857 | -2.190430423 | 3.577334745 | -0.612307927 | 0.540334046 NA |             |
| Gm13034       | 0.738722857 | -2.190430423 | 3.577334745 | -0.612307927 | 0.540334046 NA |             |
| Gm2810        | 0.738722857 | -2.190430423 | 3.577334745 | -0.612307927 | 0.540334046 NA |             |
| Gm7775        | 0.738722857 | -2.190430423 | 3.577334745 | -0.612307927 | 0.540334046 NA |             |
| Rpl31-ps15    | 0.738722857 | -2.190430423 | 3.577334745 | -0.612307927 | 0.540334046 NA |             |
| Tox3          | 10.74834617 | -2.191420215 | 0.702856122 | -3.117878817 | 0.001821577    | 0.004342036 |
| Dok4          | 51.1469126  | -2.191756258 | 0.359376655 | -6.098771937 | 1.07E-09       | 6.21E-09    |
| A930017M01Rik | 0.767221316 | -2.191997357 | 2.333037704 | -0.939546478 | 0.347450241 NA |             |
| Nrep          | 1238.785251 | -2.193337957 | 0.362248075 | -6.054795343 | 1.41E-09       | 8.04E-09    |
| Pcdhb12       | 2.824096412 | -2.193357818 | 1.427274522 | -1.536745584 | 0.124355624    | 0.18592759  |
| Hdac7         | 599.1998235 | -2.19351173  | 0.283781116 | -7.729590186 | 1.08E-14       | 1.07E-13    |
| Zfp683        | 5.865253432 | -2.193791    | 1.037047579 | -2.115419818 | 0.034394182    | 0.060711536 |
| Unc13b        | 455.8350778 | -2.194606573 | 0.212830748 | -10.31151086 | 6.25E-25       | 1.47E-23    |
| Sccpdh        | 140.297446  | -2.194781386 | 0.258174723 | -8.501147425 | 1.88E-17       | 2.43E-16    |
| Gm49121       | 0.742634106 | -2.195793335 | 3.398249453 | -0.646154252 | 0.518179463 NA |             |
| Plk4          | 61.02915337 | -2.195823439 | 0.499627948 | -4.394917154 | 1.11E-05       | 3.88E-05    |
| Gm48919       | 0.750676159 | -2.196242396 | 2.306152919 | -0.952340314 | 0.340924419 NA |             |
| Gm9913        | 0.726760884 | -2.197075695 | 2.703434874 | -0.812697845 | 0.416391317 NA |             |
| Gm13005       | 0.727893398 | -2.198068213 | 2.662494506 | -0.82556723  | 0.409049631 NA |             |
| Armxc4        | 100.1406067 | -2.19835388  | 0.44397236  | -4.951555728 | 7.36E-07       | 3.03E-06    |
| Gm5745        | 0.758169676 | -2.198365236 | 2.385980462 | -0.921367661 | 0.356858507 NA |             |
| Reep1         | 11.80908508 | -2.199160747 | 0.790722607 | -2.781203835 | 0.005415772    | 0.011691955 |
| Kl            | 20.99764644 | -2.200134688 | 0.811037823 | -2.712739932 | 0.006672945    | 0.014108939 |
| Sycp2l        | 6.88110324  | -2.200850642 | 1.086106705 | -2.026366868 | 0.042727204    | 0.073539966 |
| Gm15043       | 0.747743257 | -2.201067507 | 2.702068448 | -0.81458614  | 0.415309247 NA |             |
| Cd96          | 6.835669941 | -2.201161294 | 1.104125752 | -1.99357844  | 0.046198143    | 0.078845325 |
| Rcn1          | 238.599978  | -2.201196264 | 0.341231104 | -6.450749175 | 1.11E-10       | 7.22E-10    |
| Dnaic2        | 0.736721703 | -2.204639886 | 3.259597501 | -0.67635341  | 0.49881629 NA  |             |
| Pde7a         | 338.963898  | -2.204824132 | 0.254475803 | -8.664179886 | 4.55E-18       | 6.18E-17    |
| Fbxo17        | 70.17240218 | -2.204837531 | 0.389871132 | -5.655298249 | 1.56E-08       | 7.87E-08    |
| Ophn1         | 125.0293775 | -2.205131167 | 0.367471108 | -6.000828685 | 1.96E-09       | 1.10E-08    |
| Rab27b        | 87.85020489 | -2.205988328 | 0.496867704 | -4.439790127 | 9.00E-06       | 3.20E-05    |
| Trp53i11      | 294.4037779 | -2.20652007  | 0.322136048 | -6.849652753 | 7.40E-12       | 5.50E-11    |
| Gm9434        | 0.748772999 | -2.206531128 | 3.392883575 | -0.65034095  | 0.515472011 NA |             |
| Nlrp5-ps      | 9.149680727 | -2.207246718 | 0.851520469 | -2.592124087 | 0.009538536    | 0.019465282 |
| Clic1         | 774.0090519 | -2.208629447 | 0.147636604 | -14.9599042  | 1.34E-50       | 2.01E-48    |
| Antkdd1a      | 0.737497607 | -2.209292672 | 2.657606041 | -0.83130932  | 0.405798911 NA |             |
| Ptgs2         | 7.501287113 | -2.209680192 | 1.219835386 | -1.811457691 | 0.070070033    | 0.113249329 |
| Dab2ip        | 680.3857212 | -2.209852482 | 0.224059328 | -9.862800651 | 6.03E-23       | 1.20E-21    |
| Cd69          | 15.69369549 | -2.209997995 | 0.658723306 | -3.354971619 | 0.000793731    | 0.002038802 |
| Gm8189        | 38.87140413 | -2.210468676 | 0.723385619 | -3.0557266   | 0.002245159    | 0.005258341 |
| Trbv3         | 0.740018071 | -2.210853682 | 2.305964638 | -0.958754373 | 0.337682499 NA |             |
| Rhbdl3        | 17.18295489 | -2.211009012 | 0.793764422 | -2.785472556 | 0.005344976    | 0.011554801 |
| Pcdha4        | 0.751561889 | -2.211489398 | 3.390483692 | -0.652263688 | 0.514231081 NA |             |
| 1700016H13Rik | 0.752458088 | -2.211826812 | 3.338056393 | -0.662609181 | 0.507580889 NA |             |
| Cetn4         | 20.92193227 | -2.212350219 | 0.562911856 | -3.930189417 | 8.49E-05       | 0.000260021 |

|               |             |              |             |              |                |             |
|---------------|-------------|--------------|-------------|--------------|----------------|-------------|
| Cfap300       | 21.23443796 | -2.212555895 | 0.583174399 | -3.793986665 | 0.000148248    | 0.000435596 |
| Gemin8        | 90.2904795  | -2.212840786 | 0.379503773 | -5.830879542 | 5.51E-09       | 2.94E-08    |
| Slc9a7        | 18.73321432 | -2.213906759 | 0.673079889 | -3.289218403 | 0.00100466     | 0.002531774 |
| Dio2          | 0.742362202 | -2.21400084  | 2.717170256 | -0.814818591 | 0.415176158 NA |             |
| Ccdc114       | 77.82374803 | -2.216165863 | 0.381164117 | -5.814203808 | 6.09E-09       | 3.23E-08    |
| Dnah7b        | 32.05696445 | -2.216541907 | 0.710299245 | -3.120574778 | 0.001804985    | 0.004306701 |
| Dsg1b         | 2.824192887 | -2.216982234 | 1.617154374 | -1.370915647 | 0.170401253    | 0.242366141 |
| Scg2          | 1.574985807 | -2.217036027 | 1.812451797 | -1.223224822 | 0.221244793 NA |             |
| Baiap3        | 7.61204445  | -2.218654762 | 0.854743645 | -2.595696118 | 0.009439951    | 0.019277946 |
| Asb9          | 0.729717898 | -2.218964676 | 3.289278349 | -0.674605321 | 0.499926551 NA |             |
| Dsg1a         | 4.514521046 | -2.219262415 | 1.147609905 | -1.933812531 | 0.053136182    | 0.088923689 |
| Apold1        | 53.62069053 | -2.219352056 | 0.468635976 | -4.735769702 | 2.18E-06       | 8.39E-06    |
| Pfcp          | 146.6093238 | -2.219927102 | 0.266469635 | -8.330882057 | 8.02E-17       | 9.71E-16    |
| Atad2         | 222.6167949 | -2.219956679 | 0.399424927 | -5.557882162 | 2.73E-08       | 1.34E-07    |
| Prl7d1        | 10.87589901 | -2.220324781 | 0.731313969 | -3.036075988 | 0.00239679     | 0.005578221 |
| Oas1g         | 109.442531  | -2.22037784  | 0.433136087 | -5.126282267 | 2.96E-07       | 1.28E-06    |
| Gm5093        | 1.630434879 | -2.22085397  | 1.840894787 | -1.206399185 | 0.22766361 NA  |             |
| Galnt15       | 109.2222848 | -2.221279818 | 0.618468453 | -3.591581442 | 0.000328677    | 0.000906682 |
| Ddias         | 51.40575116 | -2.222883349 | 0.474618251 | -4.683518483 | 2.82E-06       | 1.07E-05    |
| AC168977.2    | 0.762098576 | -2.224506216 | 2.69537714  | -0.825304252 | 0.409198878 NA |             |
| Kif27         | 14.99008696 | -2.225129496 | 0.754860771 | -2.947734976 | 0.003201114    | 0.007266656 |
| Syt6          | 0.766379838 | -2.225164994 | 2.705787413 | -0.822372439 | 0.410864961 NA |             |
| Rasal3        | 86.77836425 | -2.226567187 | 0.398132632 | -5.592526236 | 2.24E-08       | 1.11E-07    |
| St8sia2       | 4.19644513  | -2.227116993 | 1.686074919 | -1.320888514 | 0.18653854     | 0.261651229 |
| Pnma1         | 1.614971024 | -2.228244831 | 1.8093051   | -1.231547311 | 0.218118233 NA |             |
| Gm3776        | 544.3076415 | -2.229271163 | 0.804241828 | -2.771891594 | 0.005573159    | 0.012006978 |
| Gm5715        | 0.761017324 | -2.230801895 | 2.345906039 | -0.950934035 | 0.341637863 NA |             |
| 1700013F07Rik | 0.748865638 | -2.23140401  | 2.651948105 | -0.841420692 | 0.400112298 NA |             |
| Car12         | 1.516185035 | -2.232934362 | 1.727516345 | -1.292569166 | 0.19616011 NA  |             |
| Map4k1        | 51.25756538 | -2.233421767 | 0.532512208 | -4.194123129 | 2.74E-05       | 9.04E-05    |
| Eno2          | 18.62268775 | -2.235310581 | 0.650711051 | -3.435181524 | 0.000592157    | 0.001562136 |
| Fzd3          | 23.27071931 | -2.236099001 | 0.64863099  | -3.447413145 | 0.000565982    | 0.001498271 |
| Gm6807        | 0.762645793 | -2.239186047 | 2.749805822 | -0.81430697  | 0.415469118 NA |             |
| B430306N03Rik | 28.26614047 | -2.239986101 | 0.704016843 | -3.181722317 | 0.001464021    | 0.003567557 |
| Hunk          | 199.7131118 | -2.240342096 | 0.303895797 | -7.372073321 | 1.68E-13       | 1.48E-12    |
| Marveld3      | 98.28389221 | -2.242290685 | 0.3791642   | -5.913772143 | 3.34E-09       | 1.83E-08    |
| Arl14         | 3.219418867 | -2.243329115 | 1.358378698 | -1.651475481 | 0.098641523    | 0.152612822 |
| Gm7085        | 0.769115934 | -2.243362874 | 2.344090369 | -0.957029176 | 0.338552529 NA |             |
| Pcdhga3       | 5.925931083 | -2.243845385 | 1.00375704  | -2.235446723 | 0.025388036    | 0.046429439 |
| Gm8093        | 1.286378548 | -2.244444127 | 2.198649041 | -1.020828739 | 0.307335586 NA |             |
| Sult2a3       | 0.771809822 | -2.24533213  | 3.322362435 | -0.675823958 | 0.499152422 NA |             |
| Gm8546        | 0.771923987 | -2.245522308 | 3.322269264 | -0.675900154 | 0.49910404 NA  |             |
| Cldn18        | 3.800618542 | -2.245760158 | 1.553282461 | -1.445815693 | 0.148228903    | 0.215614876 |
| Gm7896        | 0.731363879 | -2.246026158 | 3.575709048 | -0.628134484 | 0.529915845 NA |             |
| Pak7          | 0.731363879 | -2.246026158 | 3.575709048 | -0.628134484 | 0.529915845 NA |             |
| Myo16         | 0.763206555 | -2.248366314 | 2.653255108 | -0.847399222 | 0.396772638 NA |             |
| Gm3448        | 4.517912475 | -2.248527267 | 1.331964683 | -1.688128294 | 0.091386604    | 0.143050117 |
| Ngf           | 209.5740935 | -2.249563711 | 0.256807504 | -8.75972734  | 1.96E-18       | 2.74E-17    |
| Osbp17        | 160.5950568 | -2.249928493 | 0.244164497 | -9.214806075 | 3.12E-20       | 5.07E-19    |
| 4930415O20Rik | 1.637076521 | -2.250236313 | 1.858304508 | -1.210908279 | 0.225930559    | 0.307518098 |
| Gnai1         | 201.1914104 | -2.250999813 | 0.407937483 | -5.518001911 | 3.43E-08       | 1.66E-07    |
| Plekho2       | 194.9126827 | -2.251619893 | 0.283655653 | -7.937863622 | 2.06E-15       | 2.19E-14    |
| Gm11427       | 58.23092246 | -2.252974697 | 0.435581096 | -5.172342689 | 2.31E-07       | 1.02E-06    |
| Zfp580        | 44.44421373 | -2.253352111 | 0.419526054 | -5.371185154 | 7.82E-08       | 3.64E-07    |
| Gm7592        | 0.776071934 | -2.253552604 | 2.342352928 | -0.962089264 | 0.336004767 NA |             |
| Ajap1         | 7.233412889 | -2.253709209 | 1.217383485 | -1.851273026 | 0.064130285    | 0.104731592 |
| Cd7           | 13.46764838 | -2.253885333 | 0.696283399 | -3.237022935 | 0.001207837    | 0.00299901  |
| Trps1         | 38.50652731 | -2.254090917 | 0.436018437 | -5.169714688 | 2.34E-07       | 1.03E-06    |
| Ifi44         | 140.0288728 | -2.254099194 | 0.511716548 | -4.404976159 | 1.06E-05       | 3.72E-05    |
| Rps13-ps4     | 2.892588533 | -2.256782028 | 1.612441082 | -1.399605886 | 0.161631371    | 0.231768156 |
| Lxn           | 34.25034161 | -2.256981196 | 0.512477708 | -4.404057313 | 1.06E-05       | 3.73E-05    |
| Dupd1         | 0.774330963 | -2.257609403 | 2.729849461 | -0.827008754 | 0.4082321 NA   |             |
| Cd300a        | 148.1513148 | -2.258150471 | 0.34581086  | -6.53001607  | 6.58E-11       | 4.40E-10    |
| Slc5a11       | 3.55649874  | -2.25863267  | 1.481744887 | -1.524306033 | 0.127432281    | 0.189751552 |
| Cica2         | 1.833297607 | -2.258807557 | 1.584466856 | -1.425594702 | 0.153985366    | 0.222771769 |
| Pcdhga8       | 2.947964189 | -2.259107761 | 1.38425637  | -1.632000986 | 0.102679279    | 0.157842772 |

|               |             |              |             |              |                |             |
|---------------|-------------|--------------|-------------|--------------|----------------|-------------|
| Rtl6          | 13.48324807 | -2.259567861 | 0.650199505 | -3.475191604 | 0.000510489    | 0.001361516 |
| Cdt1          | 195.7534613 | -2.259754112 | 0.340464607 | -6.63726585  | 3.20E-11       | 2.21E-10    |
| Trbj1-6       | 0.820851081 | -2.2601624   | 2.299617249 | -0.982842863 | 0.325684783 NA |             |
| Layn          | 21.2992364  | -2.260306763 | 0.503948489 | -4.485194051 | 7.28E-06       | 2.62E-05    |
| Cyp39a1       | 690.1667535 | -2.260418029 | 0.32554061  | -6.943582344 | 3.82E-12       | 2.93E-11    |
| S100g         | 29.10153775 | -2.262198098 | 1.425388136 | -1.587075155 | 0.112495624    | 0.170837823 |
| Scrg1         | 0.782300491 | -2.262563719 | 2.340874775 | -0.966546243 | 0.333770919 NA |             |
| Glp2r         | 2.922412047 | -2.263092561 | 1.687690575 | -1.340940452 | 0.179939787    | 0.25383645  |
| Chrm1         | 20.94441573 | -2.264247684 | 0.674415508 | -3.357348188 | 0.000786939    | 0.002022881 |
| Zfp385c       | 5.970058261 | -2.264331924 | 1.003071287 | -2.257398803 | 0.023983166    | 0.044177744 |
| Pik3ap1       | 1528.976269 | -2.264559816 | 0.277041687 | -8.174076038 | 2.98E-16       | 3.43E-15    |
| Rab8b         | 222.5752339 | -2.265028257 | 0.24308222  | -9.317951181 | 1.19E-20       | 2.00E-19    |
| Fkbp6         | 0.741601591 | -2.268535231 | 2.757052958 | -0.822811627 | 0.410615123 NA |             |
| Gjb4          | 1.718033315 | -2.269854893 | 1.808144002 | -1.25535073  | 0.209351467    | 0.288126569 |
| Car10         | 1.755983308 | -2.269856142 | 1.863919125 | -1.217786819 | 0.223304995    | 0.304503563 |
| Col23a1       | 20.38651388 | -2.270609414 | 0.709348517 | -3.200978589 | 0.001369617    | 0.003362505 |
| Pcdhb22       | 17.57411092 | -2.270675956 | 0.585333511 | -3.879285764 | 0.000104764    | 0.000315731 |
| Lax1          | 31.36331945 | -2.270875967 | 0.528461187 | -4.297148065 | 1.73E-05       | 5.88E-05    |
| Tspan17       | 164.3626833 | -2.271223624 | 0.250972745 | -9.049682364 | 1.43E-19       | 2.20E-18    |
| Gm15079       | 1.771082989 | -2.27215456  | 1.641166791 | -1.384475102 | 0.166213027    | 0.237260293 |
| Clspn         | 42.57030598 | -2.272233116 | 0.778483664 | -2.918793573 | 0.003513888    | 0.007894997 |
| Casp4         | 68.23243568 | -2.272627322 | 0.35907541  | -6.32910875  | 2.47E-10       | 1.54E-09    |
| M1ap          | 0.763487924 | -2.272743629 | 2.298170982 | -0.988935831 | 0.322694538 NA |             |
| Acvr11        | 127.3537564 | -2.273325079 | 0.490052357 | -4.638943258 | 3.50E-06       | 1.32E-05    |
| Tnfaip6       | 10.34909154 | -2.275718574 | 0.834515081 | -2.726995144 | 0.006391398    | 0.013562429 |
| Il10rb        | 533.3822404 | -2.275719084 | 0.218833789 | -10.39930395 | 2.50E-25       | 6.03E-24    |
| C1qtnf1       | 161.0100889 | -2.275947494 | 0.280288137 | -8.120027917 | 4.66E-16       | 5.26E-15    |
| Gmds          | 122.4469224 | -2.276492466 | 0.312253684 | -7.29052237  | 3.09E-13       | 2.65E-12    |
| Tmem253       | 1.564933271 | -2.277727223 | 1.827502384 | -1.24636074  | 0.212631988 NA |             |
| Gpr25         | 0.785444187 | -2.277839039 | 2.25600505  | -1.009678165 | 0.312649507 NA |             |
| Rnf182        | 0.785017711 | -2.278096709 | 2.294631895 | -0.99279397  | 0.320810369 NA |             |
| Nphp4         | 3.936374458 | -2.279548568 | 1.159845873 | -1.965389214 | 0.049369207    | 0.083455254 |
| Gm9521        | 3.325373605 | -2.279589123 | 1.408917753 | -1.61797175  | 0.105668686    | 0.161680107 |
| Mt3           | 1.73620659  | -2.279727507 | 2.219557212 | -1.027109144 | 0.304369074    | 0.394471945 |
| Nfkbid        | 24.48771699 | -2.279821387 | 0.512765298 | -4.446130413 | 8.74E-06       | 3.11E-05    |
| Lmnb1         | 326.1313175 | -2.280288253 | 0.342553808 | -6.656730115 | 2.80E-11       | 1.95E-10    |
| Bgn           | 3863.472995 | -2.280654419 | 0.21074592  | -10.82182003 | 2.71E-27       | 7.62E-26    |
| Piwil2        | 10.32714714 | -2.280717924 | 0.778586428 | -2.929306038 | 0.003397198    | 0.00766584  |
| Em1           | 113.3015654 | -2.280738736 | 0.344959633 | -6.611610504 | 3.80E-11       | 2.60E-10    |
| Gabbr1        | 364.6090826 | -2.280826876 | 0.350067661 | -6.51538868  | 7.25E-11       | 4.82E-10    |
| Pygm          | 35.55560797 | -2.281071644 | 0.538127462 | -4.238905845 | 2.25E-05       | 7.52E-05    |
| Klrd1         | 17.13289553 | -2.282298513 | 0.627586212 | -3.636629467 | 0.000276229    | 0.000773259 |
| Cadm4         | 863.4590543 | -2.282608048 | 0.188534321 | -12.10712214 | 9.68E-34       | 4.54E-32    |
| Casq2         | 4.005361131 | -2.28278441  | 1.306443329 | -1.747327541 | 0.080580538    | 0.128003822 |
| Eid1          | 356.0779191 | -2.28317705  | 0.19140288  | -11.92864524 | 8.39E-33       | 3.62E-31    |
| Slc39a6       | 131.6158161 | -2.283323523 | 0.253186531 | -9.018345158 | 1.91E-19       | 2.89E-18    |
| Fam83a        | 45.59905411 | -2.283369525 | 0.695786164 | -3.281711597 | 0.001031791    | 0.002594391 |
| AC123873.1    | 0.75163625  | -2.283583642 | 3.321592915 | -0.687496542 | 0.491769879 NA |             |
| 1-Mar         | 85.08282533 | -2.284432129 | 0.37559471  | -6.082173336 | 1.19E-09       | 6.85E-09    |
| Dyrk4         | 1.408109922 | -2.285263682 | 1.938863893 | -1.17866122  | 0.238533103 NA |             |
| Olfr1428      | 0.807073379 | -2.286849215 | 2.066681658 | -1.106531917 | 0.268496357 NA |             |
| Zfp52         | 38.26543507 | -2.287038373 | 0.488758878 | -4.679277402 | 2.88E-06       | 1.09E-05    |
| Elk3          | 298.1585282 | -2.287894106 | 0.219396477 | -10.42812601 | 1.84E-25       | 4.48E-24    |
| Rassf10       | 15.56032253 | -2.289656236 | 0.624918581 | -3.663927279 | 0.000248377    | 0.000700933 |
| Gm7694        | 444.8197129 | -2.290127986 | 0.275860277 | -8.30176789  | 1.03E-16       | 1.23E-15    |
| Map3k7cl      | 1.679598565 | -2.29053184  | 1.648592956 | -1.389385919 | 0.16471543     | 0.235398495 |
| Agap2         | 73.16036194 | -2.290755022 | 0.41681948  | -5.495796458 | 3.89E-08       | 1.87E-07    |
| Ecrq4         | 1.628394171 | -2.291415567 | 2.1025216   | -1.08984163  | 0.275782912 NA |             |
| Cdh3          | 50.97611034 | -2.291936359 | 0.373508938 | -6.136228952 | 8.45E-10       | 4.97E-09    |
| Ccl5          | 55.71369169 | -2.292326657 | 0.415467904 | -5.517457876 | 3.44E-08       | 1.67E-07    |
| C130050018Rik | 25.40660286 | -2.292954914 | 0.597612735 | -3.836857516 | 0.000124619    | 0.00037038  |
| Tnfsf13       | 56.99220284 | -2.292968065 | 0.44233857  | -5.183739828 | 2.17E-07       | 9.60E-07    |
| Lhfp          | 460.4076428 | -2.293245506 | 0.210185724 | -10.9105674  | 1.03E-27       | 2.98E-26    |
| Bcl6b         | 66.47537343 | -2.29334744  | 0.432605884 | -5.301239591 | 1.15E-07       | 5.25E-07    |
| Gpr33         | 0.804276445 | -2.293720448 | 2.298638837 | -0.997860304 | 0.318347103 NA |             |
| Gm17545       | 0.802199669 | -2.293925884 | 2.386310109 | -0.961285742 | 0.336408515 NA |             |



|               |             |              |             |              |                |             |
|---------------|-------------|--------------|-------------|--------------|----------------|-------------|
| Gm7240        | 7.829716697 | -2.295409847 | 1.122244429 | -2.045374241 | 0.040817976    | 0.070649122 |
| Gm9922        | 4.821309264 | -2.297409993 | 1.157776372 | -1.984329659 | 0.047219102    | 0.080362509 |
| Rarg          | 300.0718123 | -2.298641424 | 0.263558179 | -8.721571196 | 2.74E-18       | 3.79E-17    |
| Efs           | 6.381119182 | -2.299025989 | 0.971272686 | -2.367024238 | 0.017931758    | 0.034114565 |
| Adam32        | 18.46985143 | -2.299669623 | 0.889786887 | -2.584517322 | 0.009751541    | 0.019840585 |
| Il2rg         | 112.6409534 | -2.299963241 | 0.426873219 | -5.387930515 | 7.13E-08       | 3.33E-07    |
| Btl1          | 0.791890301 | -2.300118375 | 3.574184984 | -0.643536466 | 0.519876061 NA |             |
| Gm10241       | 0.791890301 | -2.300118375 | 3.574184984 | -0.643536466 | 0.519876061 NA |             |
| Gpsm3         | 160.1945551 | -2.300870121 | 0.249001799 | -9.240375489 | 2.46E-20       | 4.03E-19    |
| Loxl4         | 83.15174292 | -2.301069986 | 0.591225464 | -3.892034642 | 9.94E-05       | 0.000300744 |
| Sez6l         | 0.797975556 | -2.301871399 | 2.313340218 | -0.995042312 | 0.319715686 NA |             |
| FrmD6         | 309.1767197 | -2.302214815 | 0.26090946  | -8.823807357 | 1.11E-18       | 1.59E-17    |
| Rnft2         | 17.89482904 | -2.302626946 | 0.716926726 | -3.211802354 | 0.001319051    | 0.003250532 |
| E2f2          | 45.85870497 | -2.304412555 | 0.515607178 | -4.469318216 | 7.85E-06       | 2.81E-05    |
| Notch4        | 186.9615627 | -2.304548239 | 0.378345286 | -6.091124495 | 1.12E-09       | 6.50E-09    |
| Ly6g          | 0.779530016 | -2.305291713 | 2.770681205 | -0.832030661 | 0.405391638 NA |             |
| Tgfb1         | 1372.92454  | -2.305515009 | 0.254986318 | -9.041720469 | 1.54E-19       | 2.36E-18    |
| Mok           | 11.5867824  | -2.305999767 | 0.712272819 | -3.237523188 | 0.001205721    | 0.002994194 |
| Tlr4          | 47.74167286 | -2.306129687 | 0.383181166 | -6.018379529 | 1.76E-09       | 9.94E-09    |
| Rflnb         | 85.01261571 | -2.306388696 | 0.308318926 | -7.480529097 | 7.40E-14       | 6.77E-13    |
| B3galt4       | 12.29959679 | -2.306584645 | 0.769989873 | -2.995603871 | 0.00273902     | 0.006294798 |
| Gm9302        | 0.812266713 | -2.306619311 | 2.334246422 | -0.988164441 | 0.32307212 NA  |             |
| Ggta1         | 159.3824643 | -2.306636986 | 0.280516031 | -8.222834818 | 1.99E-16       | 2.32E-15    |
| Fam110c       | 68.71912628 | -2.307087037 | 0.328016693 | -7.033443991 | 2.01E-12       | 1.60E-11    |
| Gm8995        | 140.2282114 | -2.307511555 | 0.384520391 | -6.00101219  | 1.96E-09       | 1.10E-08    |
| Slit3         | 11.97718112 | -2.307514777 | 0.794127516 | -2.905723238 | 0.003664054    | 0.008205016 |
| Gm7030        | 0.767407    | -2.309259214 | 3.308315976 | -0.698016523 | 0.485166861 NA |             |
| Procr         | 28.73506491 | -2.309472159 | 0.487762648 | -4.734827824 | 2.19E-06       | 8.43E-06    |
| Ig1c2         | 23.58632719 | -2.309998712 | 0.799273472 | -2.890123086 | 0.00385091     | 0.008582863 |
| G6pdx         | 202.1527139 | -2.310063428 | 0.217789456 | -10.60686533 | 2.77E-26       | 7.15E-25    |
| Plod2         | 70.68141492 | -2.311170529 | 0.342334606 | -6.752765413 | 1.45E-11       | 1.04E-10    |
| Prrx1         | 67.33550451 | -2.312820494 | 0.339252949 | -6.817392458 | 9.27E-12       | 6.83E-11    |
| Gpr165        | 0.782103528 | -2.313000903 | 2.273444107 | -1.017399502 | 0.308963419 NA |             |
| Gpr137b       | 99.74606522 | -2.313712819 | 0.262623944 | -8.809984279 | 1.25E-18       | 1.78E-17    |
| Kbtbd6        | 9.411563795 | -2.31408581  | 0.790609872 | -2.926962957 | 0.003422896    | 0.00771362  |
| Art4          | 130.0540799 | -2.314562161 | 0.301712832 | -7.671407762 | 1.70E-14       | 1.66E-13    |
| Mcm3          | 275.2177693 | -2.315301126 | 0.430415012 | -5.379229493 | 7.48E-08       | 3.49E-07    |
| St14          | 161.0887714 | -2.317429927 | 0.311943532 | -7.429004567 | 1.09E-13       | 9.84E-13    |
| Jrk           | 64.50882425 | -2.317846465 | 0.372812376 | -6.21719293  | 5.06E-10       | 3.04E-09    |
| Gm10045       | 3.049288815 | -2.319486112 | 2.001878032 | -1.15865506  | 0.246596816    | 0.330529011 |
| Tcte2         | 32.52026079 | -2.320336806 | 0.554247721 | -4.18646161  | 2.83E-05       | 9.32E-05    |
| Cfap52        | 2.108921892 | -2.320744923 | 1.535715907 | -1.511181145 | 0.130742305    | 0.193884378 |
| Cacnb1        | 26.4519376  | -2.321741908 | 0.606465931 | -3.828313823 | 0.000129024    | 0.00038254  |
| Srgap3        | 220.0849655 | -2.322185707 | 0.418537064 | -5.548339453 | 2.88E-08       | 1.41E-07    |
| Slc44a4       | 31.30232703 | -2.324491948 | 0.687485912 | -3.381148481 | 0.000721835    | 0.001869053 |
| 2610528A11Rik | 1.723066757 | -2.324951412 | 1.588232387 | -1.463860976 | 0.143231938    | 0.209346543 |
| Omp           | 4.832859475 | -2.324954082 | 1.172110464 | -1.98356226  | 0.04730466     | 0.080484016 |
| Asb11         | 0.785386095 | -2.325033945 | 2.648225491 | -0.877959204 | 0.379965858 NA |             |
| Nek2          | 163.5948719 | -2.325061984 | 0.452478412 | -5.138503673 | 2.77E-07       | 1.20E-06    |
| Zfp41         | 85.50835629 | -2.325595998 | 0.343864285 | -6.763121674 | 1.35E-11       | 9.75E-11    |
| Trib2         | 120.783195  | -2.327079734 | 0.280042055 | -8.309750948 | 9.59E-17       | 1.15E-15    |
| Cdrt4         | 0.784657806 | -2.327081051 | 2.64896119  | -0.878488163 | 0.379678858 NA |             |
| B430305J03Rik | 0.827145619 | -2.328443648 | 2.331165821 | -0.99883227  | 0.317875951 NA |             |
| Gm7002        | 0.827256045 | -2.328612793 | 2.331160445 | -0.998907132 | 0.317839681 NA |             |
| Abi3          | 152.6044469 | -2.328869855 | 0.327735348 | -7.105946512 | 1.20E-12       | 9.69E-12    |
| Gm10408       | 0.819099318 | -2.329508881 | 3.573380024 | -0.651906281 | 0.514461633 NA |             |
| Tmem71        | 97.07882198 | -2.329927839 | 0.310561235 | -7.502313808 | 6.27E-14       | 5.78E-13    |
| Gm6468        | 0.777074121 | -2.330438866 | 3.573354814 | -0.652171135 | 0.514290778 NA |             |
| Gm16372       | 0.828648803 | -2.330746192 | 2.33109362  | -0.999850959 | 0.31738264 NA  |             |
| Clec10a       | 34.73170614 | -2.330897805 | 0.492441443 | -4.733350206 | 2.21E-06       | 8.48E-06    |
| Gm10681       | 6.329204209 | -2.331939021 | 1.067346134 | -2.184801113 | 0.028903432    | 0.05206527  |
| Hsd3b4        | 6.329204209 | -2.331939021 | 1.067346134 | -2.184801113 | 0.028903432    | 0.05206527  |
| Ccdc103       | 5.683555503 | -2.332102865 | 1.07005102  | -2.179431468 | 0.029299631    | 0.052662109 |
| Kif22         | 102.4354775 | -2.332405618 | 0.564653576 | -4.130684227 | 3.62E-05       | 0.000117291 |
| Zscan4-ps2    | 0.788583653 | -2.332782699 | 2.647088817 | -0.881263479 | 0.378175228 NA |             |
| Ypel1         | 22.19787101 | -2.334917808 | 0.586458005 | -3.981389612 | 6.85E-05       | 0.000212638 |

|               |             |              |              |              |             |             |
|---------------|-------------|--------------|--------------|--------------|-------------|-------------|
| Dtx3          | 503.9849    | -2.335003527 | 0.263622515  | -8.857375212 | 8.19E-19    | 1.18E-17    |
| Nrxn2         | 75.34404122 | -2.335313003 | 0.497612943  | -4.693031076 | 2.69E-06    | 1.03E-05    |
| Tmem41a       | 324.6762246 | -2.336220595 | 0.214850931  | -10.87368151 | 1.54E-27    | 4.38E-26    |
| Bicdl2        | 14.19063743 | -2.336397096 | 0.793261059  | -2.945306681 | 0.003226347 | 0.007314197 |
| Ralgds        | 137.8561409 | -2.336922419 | 0.370993269  | -6.299096543 | 2.99E-10    | 1.85E-09    |
| Lca5          | 15.42304507 | -2.337317338 | 0.764984554  | -3.055378472 | 0.002247767 | 0.005262281 |
| 9330161L09Rik | 0.807889365 | -2.338023387 | 2.262933226  | -1.033182668 | 0.301518422 | NA          |
| Mapk7         | 146.2918718 | -2.339074392 | 0.321535974  | -7.27468956  | 3.47E-13    | 2.97E-12    |
| Csnk1e        | 526.672967  | -2.339141101 | 0.225906656  | -10.35445855 | 3.99E-25    | 9.51E-24    |
| Gm48583       | 26.60432565 | -2.340460771 | 0.688600734  | -3.398864764 | 0.000676662 | 0.001761449 |
| Ift122        | 222.1276959 | -2.34064082  | 0.25837993   | -9.058911101 | 1.32E-19    | 2.03E-18    |
| Abi2          | 133.232183  | -2.340722067 | 0.313128913  | -7.475266484 | 7.70E-14    | 7.04E-13    |
| Gm6254        | 1.704496951 | -2.340836902 | 2.127586472  | -1.100231146 | 0.271231424 | 0.357780355 |
| Ptgir         | 8.198361192 | -2.34231536  | 0.878840223  | -2.665234589 | 0.007693463 | 0.016053631 |
| Lpar2         | 91.44309304 | -2.343459308 | 0.310566468  | -7.545757683 | 4.50E-14    | 4.21E-13    |
| Slc22a14      | 0.851384014 | -2.34348429  | 2.711750341  | -0.864196182 | 0.387480129 | NA          |
| Gm6397        | 0.818398439 | -2.343951472 | 2.647182533  | -0.885451397 | 0.375913222 | NA          |
| Ilf6          | 0.804531371 | -2.345881212 | 2.255387949  | -1.040123147 | 0.298282691 | NA          |
| Mak           | 7.700359871 | -2.346295889 | 0.880639971  | -2.664307737 | 0.007714695 | 0.016092025 |
| Hoxc9         | 4.874755112 | -2.346450011 | 1.075928022  | -2.180861511 | 0.029193661 | 0.052504857 |
| Ppp1r27       | 0.8223901   | -2.347655801 | 2.306656179  | -1.017774484 | 0.308785141 | NA          |
| H2-M2         | 11.67114627 | -2.347928047 | 0.884038644  | -2.655911099 | 0.007909446 | 0.016457981 |
| Siglece       | 108.5236961 | -2.350517047 | 0.363653931  | -6.463609625 | 1.02E-10    | 6.67E-10    |
| Gm15604       | 0.824458697 | -2.350598831 | 2.306248955  | -1.019230308 | 0.308093641 | NA          |
| Hils1         | 0.818073071 | -2.351843003 | 2.601917636  | -0.903888336 | 0.366054614 | NA          |
| 1700066B19Rik | 10.45711587 | -2.352233562 | 0.8144481059 | -2.888015057 | 0.003876813 | 0.008631567 |
| E2f1          | 231.7758092 | -2.35283556  | 0.324200854  | -7.257339182 | 3.95E-13    | 3.36E-12    |
| Cdc7          | 42.30265832 | -2.353046343 | 0.62210113   | -3.782417727 | 0.000155312 | 0.000454552 |
| Kcnd3         | 4.933755545 | -2.35326382  | 1.533049303  | -1.535021617 | 0.124778518 | 0.186418734 |
| Cldn10        | 0.834193243 | -2.353269025 | 2.285233265  | -1.02977191  | 0.30311709  | NA          |
| Nlrc3         | 31.49032042 | -2.354993076 | 0.495458825  | -4.75315598  | 2.00E-06    | 7.74E-06    |
| Fgr           | 116.6570643 | -2.355259686 | 0.374314994  | -6.292186321 | 3.13E-10    | 1.93E-09    |
| Gm13321       | 0.803605386 | -2.355349708 | 2.600343206  | -0.905784168 | 0.365050102 | NA          |
| Srpx2         | 72.06228724 | -2.355366498 | 0.346448156  | -6.798611724 | 1.06E-11    | 7.72E-11    |
| Tmem198       | 6.354590835 | -2.355626434 | 1.182570512  | -1.991954315 | 0.046376071 | 0.079104043 |
| Edn3          | 1.64898059  | -2.355647649 | 1.764189436  | -1.335257768 | 0.181791996 | 0.256067912 |
| Ctbp2         | 116.5128616 | -2.35598484  | 0.516345245  | -4.56280921  | 5.05E-06    | 1.86E-05    |
| Maged2        | 346.5420943 | -2.357440102 | 0.281712663  | -8.368243286 | 5.85E-17    | 7.19E-16    |
| Myh9          | 7417.757985 | -2.358288653 | 0.216064926  | -10.91472226 | 9.80E-28    | 2.86E-26    |
| Adamts12      | 615.8671837 | -2.358785018 | 0.327249108  | -7.207918866 | 5.68E-13    | 4.77E-12    |
| Larp6         | 3.095443413 | -2.358851103 | 1.700866327  | -1.386852727 | 0.165486675 | 0.236322402 |
| Tgfb1i1       | 81.55841004 | -2.359802343 | 0.331326132  | -7.122294666 | 1.06E-12    | 8.64E-12    |
| Rpl30-ps10    | 0.836766893 | -2.359864393 | 3.571942449  | -0.660666969 | 0.508825911 | NA          |
| Carmil3       | 18.02901735 | -2.361221111 | 0.686360205  | -3.440206898 | 0.00058127  | 0.001536592 |
| Ly6i          | 2.386276214 | -2.36129952  | 1.817765488  | -1.299012186 | 0.193939747 | 0.270143378 |
| Spn           | 63.90137816 | -2.36210657  | 0.532671832  | -4.434449937 | 9.23E-06    | 3.28E-05    |
| A030005L19Rik | 6.800430476 | -2.364590044 | 0.984116039  | -2.402755315 | 0.016272071 | 0.031295834 |
| Pafah1b3      | 210.2006803 | -2.364868072 | 0.318536808  | -7.424159507 | 1.13E-13    | 1.02E-12    |
| Lilrb4a       | 507.7113052 | -2.3666161   | 0.303510945  | -7.797465438 | 6.32E-15    | 6.41E-14    |
| Zfp82         | 23.81005093 | -2.367064841 | 0.752298506  | -3.146443628 | 0.001652691 | 0.003982906 |
| Pglyrp1       | 15.91088999 | -2.367322118 | 0.658918166  | -3.592740706 | 0.000327218 | 0.000903284 |
| 4933407L21Rik | 1.627152716 | -2.36767453  | 1.720144685  | -1.376439174 | 0.168685707 | NA          |
| Thbd          | 128.379233  | -2.368453465 | 0.41708682   | -5.678562233 | 1.36E-08    | 6.91E-08    |
| Barx1         | 1.736006927 | -2.368535505 | 2.048523921  | -1.156215693 | 0.247592942 | 0.331602206 |
| Dusp15        | 0.803395794 | -2.368754331 | 2.74384631   | -0.863297016 | 0.387974185 | NA          |
| Spc25         | 171.4559796 | -2.368879592 | 0.363203835  | -6.522176704 | 6.93E-11    | 4.63E-10    |
| Muc13         | 17.29797432 | -2.368979419 | 0.650184514  | -3.643549435 | 0.000268904 | 0.000754365 |
| Tlr1          | 140.8851795 | -2.369428472 | 0.439417201  | -5.392206913 | 6.96E-08    | 3.26E-07    |
| Slc27a6       | 8.175202363 | -2.369687341 | 0.890265574  | -2.661775779 | 0.007772964 | 0.016197713 |
| 3-Sep         | 11.74842188 | -2.369789721 | 0.82946841   | -2.856998162 | 0.004276683 | 0.009449053 |
| Chst14        | 86.40597763 | -2.369855851 | 0.299376897  | -7.915961041 | 2.45E-15    | 2.59E-14    |
| Arrdc1        | 284.76367   | -2.373388195 | 0.248007774  | -9.569813696 | 1.07E-21    | 1.96E-20    |
| Batf          | 16.08094133 | -2.374671063 | 0.697476366  | -3.404661689 | 0.000662461 | 0.001726855 |
| Gm49486       | 6.808809892 | -2.375207984 | 1.008905641  | -2.354241951 | 0.018560526 | 0.035165575 |
| Gdpd5         | 106.8429705 | -2.375711462 | 0.350606339  | -6.776008299 | 1.24E-11    | 8.95E-11    |
| P2rx7         | 150.8727006 | -2.375962832 | 0.333279657  | -7.129036483 | 1.01E-12    | 8.26E-12    |



|               |             |              |             |              |             |             |
|---------------|-------------|--------------|-------------|--------------|-------------|-------------|
| Ttyh3         | 539.0576709 | -2.376593861 | 0.27116324  | -8.764439667 | 1.88E-18    | 2.63E-17    |
| Serp2         | 8.052318254 | -2.376599742 | 1.017184824 | -2.33644829  | 0.01946789  | 0.036701159 |
| Bin2          | 147.1068774 | -2.376736118 | 0.372361395 | -6.382874673 | 1.74E-10    | 1.11E-09    |
| H4c11         | 3.444028387 | -2.376997248 | 1.361011682 | -1.746492906 | 0.080725339 | 0.128198004 |
| Igkv8-27      | 7.926389616 | -2.377286771 | 1.180315548 | -2.014111205 | 0.043997859 | 0.075437545 |
| Srl           | 34.60968883 | -2.377338008 | 0.752712257 | -3.15836229  | 0.001586582 | 0.003837693 |
| Camk1g        | 0.868633055 | -2.377548265 | 2.325208058 | -1.022509903 | 0.306539628 | NA          |
| Gm11983       | 0.851430382 | -2.378169527 | 2.330213236 | -1.020580215 | 0.307453367 | NA          |
| Gm5948        | 0.851420697 | -2.378184778 | 2.330222294 | -1.020582793 | 0.307452145 | NA          |
| Gm6560        | 0.852757895 | -2.379043815 | 1.989873287 | -1.195575533 | 0.231862244 | NA          |
| 4930556J24Rik | 0.841466924 | -2.37954201  | 2.638195458 | -0.901958194 | 0.367079076 | NA          |
| Ifngr1        | 1327.987329 | -2.380340175 | 0.185865577 | -12.80678333 | 1.50E-37    | 9.31E-36    |
| Itgal         | 277.638527  | -2.381201882 | 0.402644614 | -5.913904721 | 3.34E-09    | 1.83E-08    |
| Csrp1         | 341.4497198 | -2.381233054 | 0.242806781 | -9.807111    | 1.05E-22    | 2.07E-21    |
| Irf8          | 319.0533301 | -2.381251234 | 0.207276485 | -11.48828454 | 1.51E-30    | 5.58E-29    |
| Sstr2         | 93.4221463  | -2.381254736 | 0.399727136 | -5.957200609 | 2.57E-09    | 1.42E-08    |
| Sinhcaf       | 230.4077313 | -2.382755122 | 0.354030723 | -6.730362561 | 1.69E-11    | 1.21E-10    |
| Gm9027        | 0.827299343 | -2.383328203 | 2.577536418 | -0.924653551 | 0.355146148 | NA          |
| Ccdc34        | 190.9380163 | -2.383485373 | 0.307958538 | -7.73963075  | 9.97E-15    | 9.93E-14    |
| Stfa1         | 0.827829657 | -2.383832968 | 2.577326282 | -0.924924789 | 0.355005031 | NA          |
| 2010300C02Rik | 6.314899185 | -2.384310109 | 1.102961817 | -2.161734044 | 0.030638682 | 0.054831855 |
| Maml2         | 78.63581888 | -2.384616004 | 0.321546914 | -7.416074929 | 1.21E-13    | 1.08E-12    |
| Rhoc          | 517.188823  | -2.384899352 | 0.22039261  | -10.82114027 | 2.73E-27    | 7.66E-26    |
| Calr4         | 14.17295633 | -2.385281166 | 0.881110614 | -2.707130214 | 0.006786763 | 0.014314084 |
| Napsa         | 49.90923013 | -2.386192157 | 0.489081296 | -4.878927446 | 1.07E-06    | 4.29E-06    |
| Thy1          | 172.3242089 | -2.386681702 | 0.298740278 | -7.989152699 | 1.36E-15    | 1.48E-14    |
| Gm5421        | 1.78459488  | -2.387278259 | 1.796483987 | -1.328861418 | 0.183893695 | 0.258537004 |
| Ighv1-23      | 0.852352029 | -2.387827687 | 2.248200733 | -1.062106089 | 0.288187526 | NA          |
| Rassf2        | 185.1340157 | -2.388139525 | 0.250156373 | -9.546586787 | 1.34E-21    | 2.44E-20    |
| Lcp2          | 164.4634911 | -2.389917157 | 0.359368738 | -6.650320144 | 2.92E-11    | 2.03E-10    |
| Spats2l       | 66.50485335 | -2.390067242 | 0.468882616 | -5.097367996 | 3.44E-07    | 1.48E-06    |
| Gm8773        | 0.821002097 | -2.391060664 | 3.203629793 | -0.746359854 | 0.455450064 | NA          |
| Gm11425       | 0.847339207 | -2.391265829 | 2.254754722 | -1.060543661 | 0.288897338 | NA          |
| Fcho1         | 45.88010566 | -2.392278603 | 0.39826786  | -6.006707654 | 1.89E-09    | 1.06E-08    |
| Tlnrd1        | 261.6065256 | -2.392608654 | 0.28638499  | -8.354518344 | 6.57E-17    | 8.03E-16    |
| Il2ra         | 13.28766976 | -2.3928673   | 0.724637657 | -3.302156986 | 0.000959444 | 0.002428596 |
| Glis1         | 3.522357388 | -2.39287954  | 1.23803082  | -1.932810963 | 0.053259489 | 0.089103805 |
| Gm5909        | 0.854796607 | -2.394641871 | 2.767057466 | -0.865410965 | 0.386813265 | NA          |
| Map3k21       | 478.8149557 | -2.395277508 | 0.245167561 | -9.769960985 | 1.52E-22    | 2.95E-21    |
| Clip3         | 19.61706481 | -2.395295862 | 0.709591776 | -3.375596986 | 0.000736557 | 0.001904281 |
| Gm49329       | 0.845591927 | -2.395360031 | 2.27801916  | -1.051510046 | 0.293024398 | NA          |
| 3830403N18Rik | 1.798221804 | -2.395561797 | 1.715186847 | -1.39667687  | 0.162510763 | 0.232742009 |
| Arid3a        | 86.48578679 | -2.396077305 | 0.395738006 | -6.054706068 | 1.41E-09    | 8.04E-09    |
| Hist1h2br     | 8.859568056 | -2.396196546 | 1.34006892  | -1.78811441  | 0.073757551 | 0.118445623 |
| Adam15        | 245.0026953 | -2.396350853 | 0.272413529 | -8.796739498 | 1.41E-18    | 1.99E-17    |
| Chrm2         | 5.032870628 | -2.397133662 | 1.313840545 | -1.824524042 | 0.068072885 | 0.110471827 |
| Rhoh          | 37.09254301 | -2.399014038 | 0.480428046 | -4.993492907 | 5.93E-07    | 2.46E-06    |
| Etv4          | 36.50648839 | -2.399207664 | 0.445318186 | -5.387625609 | 7.14E-08    | 3.34E-07    |
| Serpini1      | 28.25413095 | -2.39948676  | 0.612321954 | -3.918668514 | 8.90E-05    | 0.000271595 |
| Rnf32         | 21.58475948 | -2.399576904 | 0.762932863 | -3.145200606 | 0.00165973  | 0.003995493 |
| Plekhg2       | 572.5350324 | -2.40078534  | 0.210361784 | -11.41264963 | 3.62E-30    | 1.29E-28    |
| Krt17         | 5.45061778  | -2.403011234 | 1.078778713 | -2.227529339 | 0.025911917 | 0.047279993 |
| Ctla2a        | 134.5024664 | -2.403085882 | 0.317164147 | -7.576789204 | 3.54E-14    | 3.36E-13    |
| Chp2          | 60.33410381 | -2.40312606  | 0.565716189 | -4.247935816 | 2.16E-05    | 7.23E-05    |
| Alk           | 0.843957849 | -2.403401873 | 3.171630751 | -0.757781111 | 0.448582032 | NA          |
| Igkj5         | 0.882938084 | -2.404428515 | 2.211752458 | -1.087114657 | 0.276986141 | NA          |
| Gadd45b       | 439.445529  | -2.404586162 | 0.404072939 | -5.950871557 | 2.67E-09    | 1.47E-08    |
| Myc           | 649.4666322 | -2.405186816 | 0.318719261 | -7.546411882 | 4.47E-14    | 4.20E-13    |
| Xcl1          | 10.42549627 | -2.40541659  | 0.911044082 | -2.640285621 | 0.008283618 | 0.017150731 |
| Dlx2          | 0.86847073  | -2.406268562 | 2.195520638 | -1.095989954 | 0.273083171 | NA          |
| Ppp1r3f       | 39.67769514 | -2.408391252 | 0.729151466 | -3.30300543  | 0.000956545 | 0.002422699 |
| Gm10282       | 21.17232281 | -2.408722977 | 0.667070994 | -3.610894487 | 0.000305143 | 0.000845728 |
| Kctd12b       | 54.55809123 | -2.41015863  | 0.431597157 | -5.584278286 | 2.35E-08    | 1.16E-07    |
| Vmn1r5        | 0.858321044 | -2.410218119 | 2.639796232 | -0.913031881 | 0.361225774 | NA          |
| Gm5511        | 0.867268209 | -2.410424622 | 2.658195607 | -0.906789785 | 0.364517973 | NA          |
| Gm19046       | 1.946947174 | -2.410891091 | 1.651843199 | -1.459515705 | 0.144423221 | 0.210870767 |

|           |             |              |             |              |             |    |             |
|-----------|-------------|--------------|-------------|--------------|-------------|----|-------------|
| Tyr       | 0.835298025 | -2.410935937 | 2.250492564 | -1.071292559 | 0.284037905 | NA |             |
| Emid1     | 18.02709097 | -2.411220782 | 0.64856432  | -3.717782041 | 0.00020098  |    | 0.000577012 |
| Oas3      | 86.83471402 | -2.411509417 | 0.462960576 | -5.208887191 | 1.90E-07    |    | 8.48E-07    |
| Calr-ps   | 1.875215195 | -2.412915277 | 1.661200443 | -1.452513023 | 0.146359011 |    | 0.213368259 |
| Gm15264   | 0.831601876 | -2.413241438 | 2.619279482 | -0.921337892 | 0.356874044 | NA |             |
| Car9      | 45.16117954 | -2.413381753 | 0.718705232 | -3.357957679 | 0.000785206 |    | 0.00201873  |
| Naip2     | 205.7807773 | -2.413994676 | 0.329476265 | -7.326763513 | 2.36E-13    |    | 2.05E-12    |
| Golga7b   | 0.844381471 | -2.414475086 | 2.623447133 | -0.920344479 | 0.357392772 | NA |             |
| Gm20479   | 0.861843333 | -2.414654289 | 3.571136579 | -0.676158482 | 0.498940029 | NA |             |
| Rundc3a   | 244.6279472 | -2.416120994 | 0.437950682 | -5.516879161 | 3.45E-08    |    | 1.67E-07    |
| H2-T-ps   | 6.907844434 | -2.416154323 | 1.049116242 | -2.303037762 | 0.021276719 |    | 0.03971592  |
| Cyth3     | 219.9166127 | -2.417879583 | 0.244657448 | -9.882714006 | 4.95E-23    |    | 9.85E-22    |
| Rab3il1   | 233.7133518 | -2.418842765 | 0.244853837 | -9.878721078 | 5.15E-23    |    | 1.02E-21    |
| Zfp516    | 256.5237682 | -2.418966836 | 0.256184748 | -9.442274973 | 3.65E-21    |    | 6.40E-20    |
| Acbd7     | 0.870792129 | -2.421337414 | 2.613202318 | -0.926578626 | 0.354145357 | NA |             |
| Itga9     | 403.218222  | -2.421908151 | 0.366512301 | -6.607985987 | 3.90E-11    |    | 2.66E-10    |
| Pla2g4a   | 41.3418774  | -2.421948134 | 0.626660551 | -3.864848569 | 0.000111158 |    | 0.000333396 |
| Ighv1-54  | 0.854326987 | -2.422665589 | 2.567480811 | -0.943596376 | 0.345375945 | NA |             |
| Ccdc69    | 18.11529435 | -2.423165819 | 0.684980713 | -3.537567954 | 0.00040383  |    | 0.001097306 |
| Gm44958   | 0.844711967 | -2.423541517 | 3.16134528  | -0.766617153 | 0.443309174 | NA |             |
| Tnfsf13b  | 28.44998632 | -2.423605613 | 0.582734118 | -4.159024737 | 3.20E-05    |    | 0.000104381 |
| Gja1      | 235.2715735 | -2.42361441  | 0.355034343 | -6.826422448 | 8.71E-12    |    | 6.42E-11    |
| Phc1      | 155.6579234 | -2.423774928 | 0.410560965 | -5.903568858 | 3.56E-09    |    | 1.94E-08    |
| Gm4739    | 152.700759  | -2.42459035  | 0.354563203 | -6.838245846 | 8.02E-12    |    | 5.94E-11    |
| Sobp      | 20.90610097 | -2.424785302 | 0.742583961 | -3.26533487  | 0.001093347 |    | 0.002736659 |
| Lhx5      | 1.913738874 | -2.42515337  | 1.635709907 | -1.482630483 | 0.138172614 |    | 0.202996098 |
| Bhlha15   | 30.81512001 | -2.425428365 | 0.774330534 | -3.132290747 | 0.00173448  |    | 0.004155343 |
| Aldh3b1   | 174.4840359 | -2.425549781 | 0.280305134 | -8.653247778 | 5.01E-18    |    | 6.77E-17    |
| Gm10154   | 0.87743474  | -2.42580294  | 2.690756546 | -0.901531929 | 0.367305565 | NA |             |
| Enkd1     | 37.24894428 | -2.426150693 | 0.42324004  | -5.732327902 | 9.91E-09    |    | 5.14E-08    |
| Ceacam16  | 6.167588129 | -2.4269464   | 1.163476208 | -2.085944159 | 0.036983682 |    | 0.064752779 |
| Fbxw17    | 77.04545511 | -2.427667582 | 0.388102711 | -6.255219332 | 3.97E-10    |    | 2.41E-09    |
| Cdc25b    | 84.90747284 | -2.427781267 | 0.425854785 | -5.700960399 | 1.19E-08    |    | 6.12E-08    |
| Twf2      | 178.127632  | -2.428100826 | 0.285768063 | -8.496753614 | 1.95E-17    |    | 2.52E-16    |
| Kctd12    | 362.657571  | -2.428204638 | 0.258590337 | -9.390159991 | 5.99E-21    |    | 1.03E-19    |
| Olfr873   | 0.877109673 | -2.429545551 | 1.949588299 | -1.246183901 | 0.212696888 | NA |             |
| Fez1      | 15.96368882 | -2.429571768 | 0.823722555 | -2.949502539 | 0.00318286  |    | 0.007228106 |
| Ctrl      | 4.560180183 | -2.429904333 | 1.143598899 | -2.124787226 | 0.033604371 |    | 0.059477504 |
| Ank2      | 326.4290057 | -2.429978113 | 0.259638199 | -9.359093256 | 8.04E-21    |    | 1.38E-19    |
| Rrm2      | 324.9088532 | -2.430014558 | 0.504764708 | -4.814153053 | 1.48E-06    |    | 5.82E-06    |
| Anks6     | 26.87439941 | -2.430819156 | 0.622273255 | -3.906353259 | 9.37E-05    |    | 0.000284943 |
| Gm13033   | 5.257492857 | -2.431187423 | 1.033088803 | -2.353318917 | 0.018606668 |    | 0.035241248 |
| Ptgfrn    | 247.521438  | -2.432726926 | 0.283749526 | -8.573501289 | 1.00E-17    |    | 1.32E-16    |
| Slc35e4   | 29.05971633 | -2.433126478 | 0.458484562 | -5.306888566 | 1.12E-07    |    | 5.10E-07    |
| Cd86      | 96.9463276  | -2.43335757  | 0.353364156 | -6.886260341 | 5.73E-12    |    | 4.31E-11    |
| Pjvk      | 0.896426906 | -2.433836059 | 2.20566194  | -1.103449271 | 0.26983211  | NA |             |
| Map6      | 10.48090997 | -2.433940347 | 0.797422025 | -3.05226125  | 0.002271243 |    | 0.005310678 |
| Plscr1    | 1168.816863 | -2.434026499 | 0.254556904 | -9.561816862 | 1.16E-21    |    | 2.11E-20    |
| Usp11     | 108.8814692 | -2.436045858 | 0.355281662 | -6.85666083  | 7.05E-12    |    | 5.25E-11    |
| Tnni1     | 1.949852194 | -2.437628358 | 1.700411657 | -1.433551898 | 0.151700179 |    | 0.219988487 |
| Efcab12   | 14.0722192  | -2.43803539  | 0.753596959 | -3.235198021 | 0.001215584 |    | 0.003016488 |
| Pcdhgb1   | 7.352264071 | -2.438289497 | 1.078739361 | -2.26031383  | 0.02380178  |    | 0.043876811 |
| Trgv2     | 0.875130762 | -2.438734181 | 2.686742536 | -0.907691805 | 0.364041075 | NA |             |
| Slamf6    | 33.213823   | -2.439731074 | 0.4943251   | -4.935478849 | 8.00E-07    |    | 3.28E-06    |
| Mad2l1    | 271.6416714 | -2.439738473 | 0.36804842  | -6.628851912 | 3.38E-11    |    | 2.33E-10    |
| Gm49326   | 3.222113937 | -2.440536857 | 1.422893907 | -1.715192429 | 0.086309953 |    | 0.136103235 |
| Olfr862   | 0.835463295 | -2.440880772 | 2.306114852 | -1.058438512 | 0.28985557  | NA |             |
| Cgas      | 27.86766743 | -2.441196592 | 0.530478994 | -4.60187231  | 4.19E-06    |    | 1.56E-05    |
| Ikbip     | 164.8686701 | -2.44262055  | 0.24019743  | -10.16922018 | 2.72E-24    |    | 6.06E-23    |
| Ifi209    | 119.8086754 | -2.442633102 | 0.456140248 | -5.355004546 | 8.56E-08    |    | 3.96E-07    |
| Gm49027   | 4.143237892 | -2.44266267  | 1.552524194 | -1.573349182 | 0.115637987 |    | 0.174955307 |
| Emb       | 109.115098  | -2.444539755 | 0.35058243  | -6.972795974 | 3.11E-12    |    | 2.40E-11    |
| Rpl21-ps3 | 0.894052733 | -2.445158453 | 2.293210987 | -1.066259698 | 0.286306263 | NA |             |
| Clec12a   | 169.6212722 | -2.447762542 | 0.407261277 | -6.010300216 | 1.85E-09    |    | 1.04E-08    |
| Prr36     | 29.1215143  | -2.448083418 | 0.546709982 | -4.477846572 | 7.54E-06    |    | 2.71E-05    |
| Entpd2    | 303.2559293 | -2.448186353 | 0.254383639 | -9.623992968 | 6.33E-22    |    | 1.18E-20    |

|               |             |              |             |              |                |             |
|---------------|-------------|--------------|-------------|--------------|----------------|-------------|
| Doc2b         | 3.293701775 | -2.448937598 | 1.673701356 | -1.463186721 | 0.143416293    | 0.209580059 |
| Gm8709        | 0.882672853 | -2.449044926 | 1.946673045 | -1.258066901 | 0.208367562 NA |             |
| Kcns3         | 3.445772944 | -2.449348568 | 1.434506444 | -1.707450376 | 0.087738374    | 0.13815127  |
| Pck2          | 354.5925529 | -2.449578583 | 0.237318142 | -10.32191878 | 5.61E-25       | 1.32E-23    |
| Gm5422        | 0.885385104 | -2.450042048 | 1.947614193 | -1.257970935 | 0.208402268 NA |             |
| Traf1         | 39.57353241 | -2.450556907 | 0.454433799 | -5.392549834 | 6.95E-08       | 3.25E-07    |
| Igkv6-13      | 1.826767511 | -2.451205651 | 1.668537575 | -1.469074289 | 0.141812641    | 0.207485573 |
| Abcg1         | 198.1218744 | -2.451519995 | 0.247955988 | -9.886915866 | 4.74E-23       | 9.46E-22    |
| Tmem151a      | 20.38610863 | -2.451527388 | 0.836503067 | -2.930685475 | 0.00338215     | 0.007637952 |
| Hmgb2         | 250.6534096 | -2.451929858 | 0.396471407 | -6.184380053 | 6.23E-10       | 3.71E-09    |
| Tmem255a      | 8.311192012 | -2.452468438 | 0.957048998 | -2.562531745 | 0.010391209    | 0.021018265 |
| Ighv1-59      | 0.875241632 | -2.452587443 | 2.191332799 | -1.119221802 | 0.263045527 NA |             |
| Liph          | 24.87885566 | -2.454510644 | 0.628414727 | -3.905877024 | 9.39E-05       | 0.000285403 |
| Podxl         | 226.6009611 | -2.454861866 | 0.297704587 | -8.24596587  | 1.64E-16       | 1.92E-15    |
| Morc4         | 128.7810287 | -2.45518826  | 0.478553453 | -5.130436828 | 2.89E-07       | 1.25E-06    |
| Fam49a        | 127.4766943 | -2.456185549 | 0.323948886 | -7.582015741 | 3.40E-14       | 3.23E-13    |
| Slc9c1        | 0.863196403 | -2.457414394 | 2.606780764 | -0.942700832 | 0.345833948 NA |             |
| Smpd3         | 271.3907272 | -2.45743847  | 0.302239332 | -8.130769927 | 4.27E-16       | 4.84E-15    |
| Ptprm         | 105.8350957 | -2.457761559 | 0.323685866 | -7.593045656 | 3.12E-14       | 2.98E-13    |
| 1810010H24Rik | 323.1940724 | -2.458022918 | 0.402173039 | -6.111854049 | 9.85E-10       | 5.75E-09    |
| Ccdc136       | 20.07813382 | -2.458550715 | 0.957421867 | -2.567886528 | 0.010232064    | 0.020741526 |
| Vav3          | 37.39195047 | -2.458645206 | 0.502973836 | -4.888216904 | 1.02E-06       | 4.10E-06    |
| Ifi2712a      | 219.4043014 | -2.458827075 | 0.428360062 | -5.740094122 | 9.46E-09       | 4.92E-08    |
| Stat4         | 21.73133111 | -2.459308872 | 0.649449565 | -3.786758823 | 0.000152625    | 0.000447455 |
| Spaca1        | 0.892369484 | -2.460283721 | 1.946296111 | -1.264085001 | 0.20619952 NA  |             |
| Cox6b2        | 30.75210581 | -2.460627004 | 0.632626509 | -3.889541413 | 0.000100434    | 0.000303473 |
| Nxpe4         | 29.50544606 | -2.460878538 | 0.561794825 | -4.380386628 | 1.18E-05       | 4.13E-05    |
| Gm21293       | 0.883177308 | -2.461427779 | 2.190338643 | -1.123765855 | 0.26111237 NA  |             |
| Gm21304       | 0.883177308 | -2.461427779 | 2.190338643 | -1.123765855 | 0.26111237 NA  |             |
| Scn3b         | 5.78405228  | -2.463390487 | 0.989865303 | -2.488611813 | 0.01282429     | 0.025304225 |
| Gm14984       | 0.904834843 | -2.463513813 | 2.026329833 | -1.215751638 | 0.224079547 NA |             |
| Lum           | 430.8747952 | -2.463612685 | 0.252405868 | -9.760520651 | 1.66E-22       | 3.21E-21    |
| Gm8703        | 0.872582962 | -2.464785779 | 2.544881644 | -0.968526684 | 0.332781399 NA |             |
| Gm7600        | 1.896869545 | -2.465412388 | 1.684351307 | -1.463716255 | 0.143271492    | 0.209386404 |
| Arhgap25      | 94.47686528 | -2.466054539 | 0.359685699 | -6.856137302 | 7.07E-12       | 5.27E-11    |
| Opc           | 9.276323509 | -2.466534974 | 0.939643161 | -2.624969858 | 0.008665664    | 0.017859313 |
| Ucn2          | 0.893267984 | -2.467287183 | 2.252018125 | -1.095589399 | 0.273258503 NA |             |
| Lgals2        | 17.81446215 | -2.468474925 | 0.920820834 | -2.680733141 | 0.007346107    | 0.01539666  |
| Gm20056       | 0.870692624 | -2.469138805 | 2.564615979 | -0.962771356 | 0.335662278 NA |             |
| Tril          | 27.60821758 | -2.470324132 | 0.47589117  | -5.190943405 | 2.09E-07       | 9.28E-07    |
| Arhgap27      | 212.6409755 | -2.470324592 | 0.31284241  | -7.896386523 | 2.87E-15       | 3.01E-14    |
| Rhbdf1        | 596.0670476 | -2.471991881 | 0.245060583 | -10.08726842 | 6.29E-24       | 1.36E-22    |
| Gls           | 375.1351587 | -2.473096861 | 0.230809917 | -10.71486397 | 8.67E-27       | 2.34E-25    |
| Foxred2       | 19.18706866 | -2.473352938 | 0.702250179 | -3.522039596 | 0.00042824     | 0.00115828  |
| Bdkrb1        | 0.875264672 | -2.473596385 | 2.574715017 | -0.960726282 | 0.336689813 NA |             |
| Rbm46         | 5.194430901 | -2.474186696 | 1.145563328 | -2.159799145 | 0.030788222    | 0.055076349 |
| Guca2a        | 0.911589421 | -2.474592265 | 2.072029879 | -1.194284064 | 0.232366869 NA |             |
| Gm11687       | 0.903512213 | -2.475351654 | 3.267250863 | -0.75762522  | 0.448675378 NA |             |
| Pcdhb21       | 1.934372595 | -2.475366179 | 1.649807505 | -1.500396968 | 0.133511604    | 0.197441519 |
| Tmem237       | 125.4062412 | -2.476463475 | 0.23744666  | -10.429557   | 1.82E-25       | 4.42E-24    |
| Lbh           | 415.5999784 | -2.476465405 | 0.223777441 | -11.06664458 | 1.82E-28       | 5.57E-27    |
| Gpr371l       | 0.883104034 | -2.47657729  | 3.126895331 | -0.792024365 | 0.428346469 NA |             |
| Gnb5          | 42.05377066 | -2.476745086 | 0.551587794 | -4.490210107 | 7.12E-06       | 2.57E-05    |
| Gm6607        | 0.916173561 | -2.477202004 | 2.026001876 | -1.222704694 | 0.221441254 NA |             |
| Zbtb45        | 112.1017173 | -2.477880013 | 0.32805703  | -7.553198934 | 4.25E-14       | 3.99E-13    |
| Slc29a3       | 342.0266643 | -2.479067608 | 0.260491354 | -9.516890167 | 1.78E-21       | 3.21E-20    |
| Shc3          | 0.901132176 | -2.479812975 | 2.679241487 | -0.925565309 | 0.354671929 NA |             |
| Gm4275        | 1.945741597 | -2.480570361 | 1.778440937 | -1.39480053  | 0.163075999    | 0.233486154 |
| Rho           | 3.405577921 | -2.480751132 | 1.582222388 | -1.567890298 | 0.116906736    | 0.176483312 |
| Gm7334        | 0.865456859 | -2.480888511 | 3.569494366 | -0.695025193 | 0.487039513 NA |             |
| Gm14444       | 0.90515014  | -2.481223986 | 3.569470688 | -0.695123788 | 0.486977728 NA |             |
| Atp6v1b1      | 0.884462206 | -2.481803997 | 2.622397384 | -0.946387459 | 0.343950999 NA |             |
| Orc1          | 9.035633918 | -2.482230681 | 1.013640108 | -2.448828397 | 0.014332171    | 0.027946341 |
| Slfn8         | 87.77326733 | -2.482322502 | 0.445240453 | -5.575240268 | 2.47E-08       | 1.22E-07    |
| Tnnc1         | 67.73238803 | -2.482792605 | 0.595669584 | -4.168070141 | 3.07E-05       | 0.000100614 |
| Arg2          | 7.157347218 | -2.483157762 | 1.002782502 | -2.476267544 | 0.013276405    | 0.026096639 |

|                |             |              |             |                 |                |             |
|----------------|-------------|--------------|-------------|-----------------|----------------|-------------|
| Itgb6          | 13.13246364 | -2.483754753 | 0.728803718 | -3.407988586    | 0.000654436    | 0.001709335 |
| Uap1l1         | 466.6262251 | -2.485585351 | 0.279279652 | -8.899987275    | 5.59E-19       | 8.17E-18    |
| Defb1          | 77.83508132 | -2.4859781   | 0.441676818 | -5.628500296    | 1.82E-08       | 9.13E-08    |
| Arhgap9        | 129.0608751 | -2.486113342 | 0.274225768 | -9.065936275    | 1.24E-19       | 1.90E-18    |
| Cacna2d1       | 54.98473662 | -2.487057404 | 0.362379639 | -6.863126775    | 6.74E-12       | 5.03E-11    |
| Tlr6           | 42.02362266 | -2.487073563 | 0.463764953 | -5.362788942    | 8.19E-08       | 3.80E-07    |
| Orai2          | 67.10915896 | -2.487605042 | 0.389004189 | -6.394802705    | 1.61E-10       | 1.03E-09    |
| Tmem95         | 1.861601251 | -2.488650411 | 1.787053201 | -1.392600068    | 0.163740762    | 0.234300194 |
| Cygb           | 508.2839023 | -2.490120264 | 0.230640478 | -10.79654486    | 3.57E-27       | 9.97E-26    |
| Mansc1         | 66.72570985 | -2.490126045 | 0.440951636 | -5.647163638    | 1.63E-08       | 8.23E-08    |
| Wscd1          | 17.0367945  | -2.490384507 | 0.61929346  | -4.021331839    | 5.79E-05       | 0.000181454 |
| Rpl21-ps8      | 1.919236874 | -2.490397094 | 2.027523717 | -1.228294926    | 0.219336275    | 0.299979528 |
| AC119928.1     | 0.922709982 | -2.490995197 | 2.687575888 | -0.926855762    | 0.354001428 NA |             |
| Xlr3b          | 79.78910455 | -2.491966115 | 1.260297991 | -1.977283256    | 0.048009621    | 0.081512601 |
| Rhoj           | 190.1901986 | -2.491975377 | 0.238770562 | -10.43669435    | 1.69E-25       | 4.11E-24    |
| Fbln7          | 12.44545305 | -2.491977315 | 0.738915466 | -3.372479571    | 0.000744946    | 0.001924218 |
| Ak7            | 8.195038558 | -2.492077057 | 1.087233223 | -2.292127396    | 0.021898293    | 0.040764258 |
| Gm28637        | 0.914980299 | -2.492194078 | 3.260101966 | -0.764452801    | 0.444597454 NA |             |
| Ighv14-1       | 2.067857266 | -2.492947726 | 1.673409734 | -1.48974138     | 0.13629225     | 0.200717888 |
| 2210407C18Rik  | 0.905017486 | -2.493244588 | 3.569177822 | -0.698548717    | 0.484834102 NA |             |
| Clca1          | 0.905017486 | -2.493244588 | 3.569177822 | -0.698548717    | 0.484834102 NA |             |
| Igkv4-58       | 0.859519412 | -2.493326475 | 2.28927493  | -1.0891337      | 0.276094931 NA |             |
| Hcst           | 15.15709713 | -2.493808442 | 0.650959264 | -3.830974655    | 0.000127637    | 0.000378768 |
| Lin28a         | 29.18275426 | -2.494149902 | 1.796477067 | -1.388356104    | 0.165028636    | 0.23572754  |
| Emcn           | 124.1884094 | -2.494277055 | 0.360523227 | -6.918491984    | 4.56E-12       | 3.48E-11    |
| Haus8          | 365.2905026 | -2.494318622 | 0.286169422 | -8.716230412    | 2.88E-18       | 3.97E-17    |
| Gm18289        | 0.930076077 | -2.494482263 | 2.025483401 | -1.231549102    | 0.218117564 NA |             |
| Tacc3          | 210.8228661 | -2.496109275 | 0.361199427 | -6.910612501    | 4.83E-12       | 3.67E-11    |
| 2810047C21Rik1 | 9.685247641 | -2.498087415 | 0.90951038  | -2.746628812    | 0.006021124    | 0.012859949 |
| Ebf4           | 21.69748352 | -2.498625165 | 0.803513982 | -3.109622508    | 0.001873266    | 0.004455278 |
| Zfp239         | 26.06764651 | -2.500628916 | 0.779332101 | -3.208682039 NA | NA             |             |
| Gm16523        | 1.895913573 | -2.500868585 | 1.742019682 | -1.435614425    | 0.151112088    | 0.219247564 |
| Ttc26          | 44.39036549 | -2.500929771 | 0.450823866 | -5.547465345    | 2.90E-08       | 1.42E-07    |
| AC125149.3     | 5.123534546 | -2.502671565 | 1.200722796 | -2.084304199    | 0.037132506    | 0.064966642 |
| Gm10639        | 6.563671559 | -2.502957635 | 1.237696989 | -2.022270117    | 0.043148454    | 0.074203462 |
| 1700003F12Rik  | 5.473906534 | -2.503562948 | 1.113830854 | -2.247704791    | 0.02459502     | 0.045182748 |
| Ttc16          | 24.13754155 | -2.505408914 | 0.522799801 | -4.792291255    | 1.65E-06       | 6.45E-06    |
| Wipf1          | 191.8660402 | -2.50545002  | 0.243281226 | -10.29857527    | 7.15E-25       | 1.67E-23    |
| Epsti1         | 128.0457558 | -2.505830075 | 0.370616882 | -6.761241044    | 1.37E-11       | 9.87E-11    |
| Spin2c         | 10.1876899  | -2.505859165 | 1.035857163 | -2.419116511    | 0.015558256    | 0.030096705 |
| Gm6637         | 0.906281275 | -2.506435265 | 2.166858362 | -1.156713936    | 0.247389254 NA |             |
| Gm11331        | 9.386567877 | -2.506876069 | 0.898217182 | -2.790946465    | 0.005255416    | 0.011372726 |
| Wdr20rt        | 1.925351999 | -2.50789466  | 1.720295771 | -1.457827603    | 0.144888068    | 0.211458932 |
| Haspin         | 26.85487055 | -2.507929006 | 0.64194618  | -3.906758983    | 9.35E-05       | 0.000284516 |
| Tmprss3        | 0.88538515  | -2.508635878 | 2.617337904 | -0.958468478    | 0.337826579 NA |             |
| Bmp8b          | 41.09755781 | -2.508960743 | 0.470147061 | -5.336544569    | 9.47E-08       | 4.36E-07    |
| Gabrp          | 20.99960045 | -2.509389032 | 0.713230538 | -3.518342106    | 0.000434252    | 0.001173052 |
| Clgn           | 0.910334943 | -2.509567009 | 2.528188631 | -0.992634401    | 0.320888154 NA |             |
| Sh3kbp1        | 109.5716594 | -2.509638339 | 0.306984113 | -8.175140778    | 2.96E-16       | 3.40E-15    |
| Sncg           | 20.52530173 | -2.510507587 | 0.821014209 | -3.057812592    | 0.00222959     | 0.00522403  |
| Wfdc15b        | 11.9751366  | -2.510828443 | 0.813646568 | -3.085895695    | 0.0020294      | 0.004791938 |
| Ighv9-2        | 0.928303115 | -2.511123047 | 3.251905179 | -0.772200574    | 0.439995641 NA |             |
| Zscan4e        | 0.875990569 | -2.511304957 | 2.683964122 | -0.935670092    | 0.349443074 NA |             |
| Ncapg2         | 121.8636848 | -2.51310719  | 0.520755361 | -4.825888275    | 1.39E-06       | 5.52E-06    |
| Pip4k2a        | 242.0880035 | -2.513177878 | 0.279846721 | -8.980551469    | 2.69E-19       | 4.05E-18    |
| Trim6          | 39.11104865 | -2.513235986 | 0.549663156 | -4.572320262    | 4.82E-06       | 1.78E-05    |
| Al467606       | 35.02481786 | -2.51367718  | 0.447329001 | -5.619302967    | 1.92E-08       | 9.61E-08    |
| Ccdc155        | 0.908378511 | -2.515509602 | 2.53317405  | -0.993026753    | 0.320696917 NA |             |
| Adamts14       | 91.25310282 | -2.516403075 | 0.457439045 | -5.501067525    | 3.77E-08       | 1.82E-07    |
| Klra17         | 5.836166033 | -2.516594314 | 1.172800789 | -2.14579862     | 0.031889049    | 0.056878479 |
| Gm7595         | 0.895274851 | -2.51762956  | 2.547489977 | -0.988278495    | 0.323016275 NA |             |
| Rgs14          | 36.80968178 | -2.517661813 | 0.436034514 | -5.773996624    | 7.74E-09       | 4.06E-08    |
| Pcdhgc3        | 121.3356647 | -2.518932743 | 0.425449235 | -5.92064231     | 3.21E-09       | 1.76E-08    |
| Trim40         | 0.930427037 | -2.520439396 | 2.566121885 | -0.982197849    | 0.326002387 NA |             |
| Lck            | 44.79811167 | -2.521768625 | 0.47065929  | -5.357949324    | 8.42E-08       | 3.90E-07    |
| Zfp90          | 170.0583559 | -2.521778504 | 0.24610721  | -10.24666651    | 1.22E-24       | 2.81E-23    |

|               |             |              |             |              |             |             |
|---------------|-------------|--------------|-------------|--------------|-------------|-------------|
| Coro2a        | 69.95831243 | -2.522031915 | 0.35929559  | -7.019378983 | 2.23E-12    | 1.76E-11    |
| Dok5          | 1.996040643 | -2.52465638  | 1.615543934 | -1.562728395 | 0.118116493 | 0.178025812 |
| Mmp23         | 63.48915629 | -2.525148812 | 0.387703817 | -6.51308732  | 7.36E-11    | 4.89E-10    |
| Zdhc2         | 67.2505811  | -2.526931597 | 0.366316268 | -6.898223801 | 5.27E-12    | 3.98E-11    |
| Hsd11b2       | 0.921392616 | -2.527511062 | 3.107508077 | -0.813356233 | 0.416013845 | NA          |
| Celsr2        | 64.62266995 | -2.527604884 | 0.526489706 | -4.800862875 | 1.58E-06    | 6.19E-06    |
| Gm14585       | 0.940798607 | -2.528420247 | 3.191378944 | -0.792265755 | 0.428205735 | NA          |
| Gm9522        | 0.940950406 | -2.528633595 | 3.19129122  | -0.792354386 | 0.428154068 | NA          |
| Appl1         | 63.46398285 | -2.52864928  | 0.368151277 | -6.868506067 | 6.49E-12    | 4.85E-11    |
| Apol10a       | 5.591825617 | -2.530819695 | 1.215268202 | -2.082519473 | 0.037295046 | 0.065230937 |
| Cxcr3         | 18.50337605 | -2.530976009 | 0.841233182 | -3.008649758 | 0.002624114 | 0.006052754 |
| Ets2          | 1220.040953 | -2.531106637 | 0.194551741 | -13.00994083 | 1.07E-38    | 7.07E-37    |
| Trim30c       | 3.861188395 | -2.531688559 | 1.457215551 | -1.737346652 | 0.082326002 | 0.130493275 |
| Gjb5          | 0.927838967 | -2.53318759  | 1.917551449 | -1.321053259 | 0.186483607 | NA          |
| Ier5l         | 57.52681128 | -2.535581548 | 0.405726182 | -6.244635075 | 4.25E-10    | 2.57E-09    |
| Cap2          | 7.742277959 | -2.534082709 | 0.961700126 | -2.635002992 | 0.008413654 | 0.017403055 |
| Man1c1        | 142.8212489 | -2.534733153 | 0.240040965 | -10.55958574 | 4.59E-26    | 1.17E-24    |
| Ppp1r42       | 18.37522423 | -2.534800255 | 0.695847947 | -3.642750212 | 0.000269741 | 0.000756463 |
| Evc           | 164.0983458 | -2.535380753 | 0.53552987  | -4.7343405   | 2.20E-06    | 8.44E-06    |
| Gucy2g        | 1.908141072 | -2.535581548 | 1.688672862 | -1.501523241 | 0.13322028  | 0.197044884 |
| Cd63-ps       | 0.953174193 | -2.535713118 | 2.274348411 | -1.114918499 | 0.264885348 | NA          |
| Evl           | 205.5798015 | -2.538013874 | 0.275270454 | -9.220073707 | 2.97E-20    | 4.83E-19    |
| Arhgef2       | 327.3278736 | -2.538090447 | 0.255304204 | -9.941436164 | 2.75E-23    | 5.65E-22    |
| AC132444.1    | 0.914761485 | -2.538159881 | 2.518291994 | -1.00788943  | 0.313507547 | NA          |
| Rab36         | 70.73432617 | -2.53883943  | 0.415784118 | -6.106148168 | 1.02E-09    | 5.94E-09    |
| Lurap1        | 23.5401475  | -2.540045751 | 0.752815195 | -3.374062808 | 0.000740675 | 0.001914345 |
| Gm13285       | 0.933799253 | -2.540132089 | 2.163675087 | -1.173989618 | 0.240399184 | NA          |
| H2ap          | 1.932351618 | -2.54090278  | 1.623177656 | -1.565387973 | 0.117491967 | 0.177194183 |
| Serpin9b      | 1.952663076 | -2.541058731 | 1.795388752 | -1.415325081 | 0.156973204 | 0.226336197 |
| Spag5         | 110.7739155 | -2.541254394 | 0.509345863 | -4.989251077 | 6.06E-07    | 2.52E-06    |
| Rubcnl        | 25.65577751 | -2.541454961 | 0.527968107 | -4.813652425 | 1.48E-06    | 5.83E-06    |
| Gm28188       | 0.947294988 | -2.54147925  | 1.950629259 | -1.30290225  | 0.192608136 | NA          |
| Zfp558        | 16.46009934 | -2.542339023 | 0.609776312 | -4.169297776 | 3.06E-05    | 0.000100093 |
| Hk2           | 71.1749618  | -2.543747753 | 0.580622086 | -4.381073018 | 1.18E-05    | 4.12E-05    |
| Gm13889       | 170.7307536 | -2.544197353 | 0.26696562  | -9.53005616  | 1.57E-21    | 2.84E-20    |
| Psme2b        | 6.856014189 | -2.544981841 | 1.340839816 | -1.898050618 | 0.057689414 | 0.095475113 |
| Oasl2         | 368.2680689 | -2.545545863 | 0.240802988 | -10.57107258 | 4.06E-26    | 1.03E-24    |
| Rgs17         | 3.272648095 | -2.545976535 | 1.35653855  | -1.876818417 | 0.060542985 | 0.099627106 |
| Cldn11        | 2.009664909 | -2.546550069 | 1.803709624 | -1.411840373 | 0.157996968 | 0.227494283 |
| Themis2       | 176.2916852 | -2.547906072 | 0.411595892 | -6.190309772 | 6.00E-10    | 3.58E-09    |
| Mcm4          | 260.4650536 | -2.548075914 | 0.445107152 | -5.72463485  | 1.04E-08    | 5.37E-08    |
| Dock11        | 56.08255744 | -2.548609199 | 0.463841936 | -5.494563991 | 3.92E-08    | 1.88E-07    |
| Cacnb4        | 6.452408967 | -2.549226181 | 1.155099932 | -2.206931287 | 0.02731886  | 0.049561767 |
| Tm4sf5        | 3.492673234 | -2.549251074 | 1.240860551 | -2.054421887 | 0.039934877 | 0.069328898 |
| Eef1a2        | 0.940196053 | -2.549587517 | 2.51941199  | -1.01197721  | 0.31154895  | NA          |
| Crym          | 61.74992891 | -2.550241083 | 0.415887142 | -6.132050808 | 8.68E-10    | 5.09E-09    |
| Svep1         | 96.68263815 | -2.551397055 | 0.336810224 | -7.575176971 | 3.59E-14    | 3.40E-13    |
| Cd40lg        | 2.015412717 | -2.552115849 | 1.630398959 | -1.565332114 | 0.117505057 | 0.17719825  |
| Efemp2        | 237.2718788 | -2.552549142 | 0.272972891 | -9.350925392 | 8.69E-21    | 1.48E-19    |
| Zfp658        | 52.68362949 | -2.553161428 | 0.396501474 | -6.439223051 | 1.20E-10    | 7.78E-10    |
| Abr           | 266.7150027 | -2.554362093 | 0.254584205 | -10.03346651 | 1.09E-23    | 2.31E-22    |
| Abca13        | 1.691289375 | -2.555445918 | 1.920629859 | -1.330524935 | 0.183345376 | 0.257867531 |
| Ubxn10        | 3.893279227 | -2.555624586 | 1.308660787 | -1.952854867 | 0.050836795 | 0.08563044  |
| Igfbp7        | 4453.96697  | -2.555830385 | 0.248967949 | -10.26570046 | 1.01E-24    | 2.33E-23    |
| Cd247         | 19.25356568 | -2.555936484 | 0.685333088 | -3.729480639 | 0.000191875 | 0.000552828 |
| Efnb2         | 150.7372268 | -2.55600109  | 0.339732787 | -7.523563196 | 5.33E-14    | 4.95E-13    |
| Rap2b         | 155.2224059 | -2.556134397 | 0.276144447 | -9.256512032 | 2.11E-20    | 3.48E-19    |
| Rasgrf2       | 21.49404004 | -2.556462923 | 0.621552123 | -4.113030633 | 3.90E-05    | 0.000125869 |
| 4930550C14Rik | 4.440939797 | -2.557312977 | 1.311387598 | -1.950081716 | 0.05116638  | 0.086114432 |
| Ecsr          | 106.9356613 | -2.557967937 | 0.303457456 | -8.429412066 | 3.47E-17    | 4.37E-16    |
| Gm7582        | 0.949198608 | -2.559549555 | 3.162374256 | -0.809375914 | 0.418298952 | NA          |
| Zfp251        | 104.3464641 | -2.559785756 | 0.331914088 | -7.712193746 | 1.24E-14    | 1.22E-13    |
| Ssc5d         | 28.64264835 | -2.559864639 | 0.64336872  | -3.978845349 | 6.93E-05    | 0.000214691 |
| Slc6a20a      | 6.392239247 | -2.560124523 | 1.144174425 | -2.237529932 | 0.025251725 | 0.046224784 |
| Spon2         | 944.8237347 | -2.560174615 | 0.212789746 | -12.03147551 | 2.43E-33    | 1.09E-31    |
| Kif21b        | 153.4085733 | -2.561496037 | 0.291461525 | -8.788453433 | 1.52E-18    | 2.14E-17    |



|               |             |              |             |              |             |    |             |
|---------------|-------------|--------------|-------------|--------------|-------------|----|-------------|
| Gm6768        | 0.953653316 | -2.561661645 | 3.15000069  | -0.813225741 | 0.416088644 | NA |             |
| B3gnt6        | 2.076997649 | -2.56231194  | 1.546066466 | -1.657310339 | 0.097456748 |    | 0.151053972 |
| Rtn4rl2       | 15.12794722 | -2.563197618 | 0.836762038 | -3.063233634 | 0.00218959  |    | 0.005139493 |
| Ror2          | 3.891351531 | -2.564722526 | 1.392654009 | -1.841607829 | 0.065532535 |    | 0.106745524 |
| Sema4c        | 240.2553431 | -2.565157353 | 0.278259073 | -9.218593748 | 3.01E-20    |    | 4.90E-19    |
| D630003M21Rik | 71.16041436 | -2.56525422  | 0.46971107  | -5.461345036 | 4.73E-08    |    | 2.25E-07    |
| Cxcl10        | 183.7211291 | -2.567397295 | 0.596396152 | -4.304852213 | 1.67E-05    |    | 5.70E-05    |
| Tnfsf11       | 0.919468338 | -2.567444459 | 2.600335089 | -0.987351388 | 0.323470407 | NA |             |
| Stx3          | 91.30858322 | -2.568269833 | 0.403193831 | -6.3698143   | 1.89E-10    |    | 1.20E-09    |
| Heyl          | 119.7076919 | -2.568970798 | 0.353134693 | -7.274761871 | 3.47E-13    |    | 2.97E-12    |
| Pip5k1l       | 0.978057832 | -2.569164713 | 2.648430082 | -0.970070809 | 0.332011198 | NA |             |
| Podxl2        | 16.35821651 | -2.570197809 | 0.763892379 | -3.364607215 | 0.000766527 |    | 0.001976369 |
| Dchs2         | 3.967139917 | -2.570961569 | 1.46725746  | -1.752222523 | 0.079735552 |    | 0.126862055 |
| Hid1          | 145.3211707 | -2.571246481 | 0.385062987 | -6.677469837 | 2.43E-11    |    | 1.70E-10    |
| Pakap         | 382.9177549 | -2.571393909 | 0.265550514 | -9.683257125 | 3.55E-22    |    | 6.73E-21    |
| Lgmn          | 2344.452627 | -2.572200205 | 0.214608025 | -11.98557326 | 4.23E-33    |    | 1.86E-31    |
| Acss1         | 43.10559778 | -2.573255057 | 0.42497495  | -6.055074677 | 1.40E-09    |    | 8.02E-09    |
| Tmem221       | 18.96192856 | -2.573807246 | 0.608370645 | -4.230656537 | 2.33E-05    |    | 7.78E-05    |
| Gm10925       | 10795.06141 | -2.574200693 | 0.855099851 | -3.010409473 | 0.002608957 |    | 0.006020236 |
| Gn29776       | 0.986914275 | -2.576110993 | 2.201421288 | -1.170203544 | 0.241919067 | NA |             |
| Nsl1          | 38.73314651 | -2.576164046 | 0.639379573 | -4.02916226  | 5.60E-05    |    | 0.000175871 |
| Bst1          | 26.06044946 | -2.576468595 | 0.540821309 | -4.763992379 | 1.90E-06    |    | 7.36E-06    |
| Bard1         | 43.17935551 | -2.577025705 | 0.497681476 | -5.17806233  | 2.24E-07    |    | 9.87E-07    |
| Zfp334        | 91.37876495 | -2.577166894 | 0.315721211 | -8.162793009 | 3.27E-16    |    | 3.75E-15    |
| Amn           | 28.0596582  | -2.577758037 | 1.035819783 | -2.48861634  | 0.012824127 |    | 0.025304225 |
| Gm7558        | 0.982284527 | -2.578720731 | 1.917091482 | -1.345121375 | 0.178586042 | NA |             |
| Trbj1-1       | 1.107036963 | -2.579153443 | 2.339216254 | -1.102571615 | 0.270213243 | NA |             |
| Dscam         | 2.022119216 | -2.579975975 | 1.579785331 | -1.633118073 | 0.102444166 |    | 0.157580813 |
| Arhgdib       | 276.3617747 | -2.580148484 | 0.231133409 | -11.163027   | 6.18E-29    |    | 1.97E-27    |
| Gdpd3         | 27.51049326 | -2.581010789 | 0.669711503 | -3.853914378 | 0.000116244 |    | 0.000347307 |
| Mns1          | 21.00588513 | -2.581100075 | 0.578364097 | -4.462759857 | 8.09E-06    |    | 2.89E-05    |
| Nemp2         | 74.58764446 | -2.58130315  | 0.382775001 | -6.743656576 | 1.54E-11    |    | 1.10E-10    |
| Ighv1-12      | 2.197566221 | -2.581641048 | 1.769627785 | -1.45886105  | 0.144603355 |    | 0.21109762  |
| Vstm4         | 55.93290374 | -2.581908319 | 0.437907433 | -5.896013923 | 3.72E-09    |    | 2.03E-08    |
| Pcdhb5        | 3.949424633 | -2.582922471 | 1.363972931 | -1.893675756 | 0.058268061 |    | 0.09633924  |
| Limch1        | 63.34913487 | -2.583716453 | 0.493474072 | -5.235769419 | 1.64E-07    |    | 7.37E-07    |
| Pacs1         | 214.5727273 | -2.583820266 | 0.259891188 | -9.941931045 | 2.73E-23    |    | 5.62E-22    |
| Pkm           | 1014.905138 | -2.583983606 | 0.250214699 | -10.3270656  | 5.32E-25    |    | 1.26E-23    |
| Ceacam20      | 17.25401067 | -2.585093586 | 0.808405962 | -3.197766601 | 0.001384963 |    | 0.003397734 |
| Ctsw          | 34.63094057 | -2.585474348 | 0.600566436 | -4.30505968  | 1.67E-05    |    | 5.70E-05    |
| Gm7412        | 0.952800797 | -2.585610128 | 2.139735512 | -1.208378378 | 0.226901753 | NA |             |
| BC067074      | 9.97384172  | -2.585804075 | 0.944653231 | -2.737305066 | 0.006194482 |    | 0.01318357  |
| ltk           | 21.22362914 | -2.586853929 | 0.700786749 | -3.691356795 | 0.000223061 |    | 0.000635167 |
| Pkd1l1        | 1.161922547 | -2.589182713 | 2.316575493 | -1.117676813 | 0.263705049 | NA |             |
| Dusp4         | 112.0775281 | -2.591594723 | 0.352220155 | -7.35788309  | 1.87E-13    |    | 1.64E-12    |
| Fcrlb         | 3.679890448 | -2.592370734 | 1.3068441   | -1.983687828 | 0.047290651 |    | 0.08046925  |
| Popdc2        | 5.805062525 | -2.592526131 | 1.197107329 | -2.165658891 | 0.030337263 |    | 0.054332351 |
| Prelp         | 1539.463581 | -2.595639496 | 0.205623582 | -12.62325783 | 1.57E-36    |    | 9.15E-35    |
| Isyna1        | 585.2607772 | -2.595658735 | 0.271089071 | -9.574929457 | 1.02E-21    |    | 1.87E-20    |
| Trpm6         | 16.17843962 | -2.595874542 | 0.968965889 | -2.679015404 | 0.0073839   |    | 0.015470164 |
| Scml4         | 20.792641   | -2.595884632 | 0.660337646 | -3.931147471 | 8.45E-05    |    | 0.00025908  |
| Plppr4        | 0.935647588 | -2.595895628 | 2.212352246 | -1.173364518 | 0.24064966  | NA |             |
| Frm4a         | 321.453709  | -2.596710205 | 0.282377074 | -9.195896013 | 3.72E-20    |    | 6.01E-19    |
| Kif12         | 145.9797004 | -2.597115847 | 0.404041938 | -6.427837322 | 1.29E-10    |    | 8.35E-10    |
| Phlda2        | 29.20739914 | -2.597193542 | 0.623794448 | -4.163540649 | 3.13E-05    |    | 0.000102474 |
| Cyp3a16       | 3.538572526 | -2.597286865 | 1.59763186  | -1.625710484 | 0.104011259 |    | 0.159608732 |
| Tcam1         | 0.98010799  | -2.597757624 | 3.157509386 | -0.822723643 | 0.410665167 | NA |             |
| Hdx           | 13.80138179 | -2.599227401 | 0.716166923 | -3.629359745 | 0.000284125 |    | 0.00079289  |
| Elovl4        | 0.98784133  | -2.599227901 | 2.264618832 | -1.147755139 | 0.251069662 | NA |             |
| Cd248         | 40.72549253 | -2.600373564 | 0.509639716 | -5.102376209 | 3.35E-07    |    | 1.44E-06    |
| Klf5          | 57.75494284 | -2.600550963 | 0.534757    | -4.863051746 | 1.16E-06    |    | 4.63E-06    |
| Sgk1          | 1081.883687 | -2.600715881 | 0.447950236 | -5.805814284 | 6.41E-09    |    | 3.39E-08    |
| Lrrc49        | 28.68783028 | -2.601630637 | 0.545351105 | -4.770560864 | 1.84E-06    |    | 7.14E-06    |
| Diras2        | 2.053579787 | -2.60177824  | 1.758315021 | -1.479699718 | 0.138953401 |    | 0.203879644 |
| Trim16        | 23.73829549 | -2.60408417  | 0.528293241 | -4.929239993 | 8.26E-07    |    | 3.37E-06    |
| Ptafr         | 71.14129223 | -2.604338492 | 0.345279213 | -7.542702816 | 4.60E-14    |    | 4.31E-13    |

|               |             |              |             |              |                |             |
|---------------|-------------|--------------|-------------|--------------|----------------|-------------|
| Csmd1         | 3.947263924 | -2.604589808 | 1.494588885 | -1.742679765 | 0.081389568    | 0.12918065  |
| Spata6        | 89.59088925 | -2.604739862 | 0.309163964 | -8.425108242 | 3.60E-17       | 4.52E-16    |
| Gm20765       | 0.972363758 | -2.605653328 | 1.896928216 | -1.373617254 | 0.169560537 NA |             |
| Gm21312       | 0.972363758 | -2.605653328 | 1.896928216 | -1.373617254 | 0.169560537 NA |             |
| Mecom         | 39.55947058 | -2.605777131 | 0.495046426 | -5.263702546 | 1.41E-07       | 6.37E-07    |
| Nphs2         | 0.980013941 | -2.605839614 | 2.535171655 | -1.027875019 | 0.304008622 NA |             |
| Nckap5l       | 97.52281119 | -2.607075078 | 0.483820167 | -5.388520895 | 7.10E-08       | 3.32E-07    |
| Gm1972        | 0.986579341 | -2.608177077 | 3.211002802 | -0.812262473 | 0.416641039 NA |             |
| Gm8701        | 0.984963809 | -2.608675553 | 3.566484047 | -0.731441812 | 0.464509334 NA |             |
| Clstn2        | 11.12684174 | -2.609438401 | 0.818110132 | -3.189593062 | 0.001424733    | 0.003484769 |
| Cers6         | 685.745866  | -2.610767647 | 0.267720291 | -9.751848239 | 1.81E-22       | 3.49E-21    |
| Gm16238       | 3.721295227 | -2.61079441  | 1.47847862  | -1.765865515 | 0.077418414    | 0.123625808 |
| Nalcn         | 4.861357985 | -2.611518602 | 1.358677489 | -1.922103386 | 0.05459275     | 0.090945733 |
| Rpl13-ps6     | 0.956768603 | -2.613224978 | 3.10397766  | -0.84189555  | 0.399846422 NA |             |
| Igkv4-90      | 0.962783631 | -2.613232158 | 2.492975697 | -1.04823812  | 0.294528912 NA |             |
| Pthr1         | 66.41294357 | -2.613877976 | 0.415821472 | -6.286058205 | 3.26E-10       | 2.00E-09    |
| Agpat4        | 85.09250809 | -2.613924193 | 0.493541829 | -5.296256653 | 1.18E-07       | 5.38E-07    |
| Fsip1         | 2.26038811  | -2.614088894 | 1.550291439 | -1.686191917 | 0.09175884     | 0.143554453 |
| Spag6l        | 2.974198146 | -2.614823642 | 1.492394533 | -1.75209945  | 0.079756709    | 0.126862055 |
| Begain        | 2.04247713  | -2.615422311 | 1.786179662 | -1.464254893 | 0.143124317    | 0.209207181 |
| Majin         | 0.996653613 | -2.615902028 | 2.520142804 | -1.037997539 | 0.299271201 NA |             |
| Aph1c         | 107.5182535 | -2.616521061 | 0.315113852 | -8.303414917 | 1.01E-16       | 1.21E-15    |
| Hist1h2ao     | 1.000679927 | -2.616663048 | 3.119964993 | -0.838683464 | 0.40164696 NA  |             |
| Anxa5         | 6519.200686 | -2.616710004 | 0.222856284 | -11.74169268 | 7.79E-32       | 3.13E-30    |
| Smarca1       | 8.597371333 | -2.617153769 | 1.053470222 | -2.484316797 | 0.012980028    | 0.025575996 |
| Sh3bgrl3      | 694.1043729 | -2.617702291 | 0.213489312 | -12.26151451 | 1.46E-34       | 7.20E-33    |
| Wfdc2         | 300.6259606 | -2.618659501 | 0.265554943 | -9.861083632 | 6.14E-23       | 1.22E-21    |
| Gm5576        | 1.011488    | -2.618703527 | 2.235815955 | -1.171251829 | 0.241497568 NA |             |
| Hey1          | 33.27248954 | -2.618850116 | 0.606941399 | -4.314831912 | 1.60E-05       | 5.46E-05    |
| Acot9         | 237.1632407 | -2.618907277 | 0.282400367 | -9.273738938 | 1.80E-20       | 2.98E-19    |
| Gas6          | 3093.840204 | -2.621538878 | 0.246102344 | -10.65223041 | 1.70E-26       | 4.48E-25    |
| Dio3          | 12.66849547 | -2.621576573 | 0.808740544 | -3.241554528 | 0.001188797    | 0.002955609 |
| Ncam1         | 70.90050108 | -2.622018995 | 0.567877384 | -4.617227362 | 3.89E-06       | 1.45E-05    |
| Gm7298        | 7.69692003  | -2.623041871 | 0.939598675 | -2.791661951 | 0.005243811    | 0.011349053 |
| Syt17         | 19.85490056 | -2.623224965 | 1.035932417 | -2.532235617 | 0.01133378     | 0.022728889 |
| Cnn2          | 287.1799491 | -2.624562617 | 0.251140744 | -10.45056479 | 1.46E-25       | 3.58E-24    |
| Garem2        | 0.997160233 | -2.62485526  | 3.136371928 | -0.83690816  | 0.402644193 NA |             |
| Pik3cd        | 250.7352798 | -2.62530263  | 0.263479372 | -9.963977873 | 2.19E-23       | 4.56E-22    |
| Tll2          | 0.998063406 | -2.626055026 | 3.135909735 | -0.837414099 | 0.402359843 NA |             |
| Igkv2-116     | 0.98004097  | -2.628033865 | 2.547581558 | -1.031579875 | 0.302268972 NA |             |
| Vwc2          | 0.99805172  | -2.628869845 | 2.106490337 | -1.247985713 | 0.212036289 NA |             |
| Gm20219       | 12.89716109 | -2.62905098  | 0.750982304 | -3.500816153 | 0.000463836    | 0.001246252 |
| Pdgfrb        | 492.0132397 | -2.629635042 | 0.228092732 | -11.52879802 | 9.45E-31       | 3.52E-29    |
| Rcan3         | 79.05130342 | -2.631972338 | 0.477618332 | -5.510618339 | 3.58E-08       | 1.73E-07    |
| Epha3         | 44.89195062 | -2.632025131 | 0.397102388 | -6.628076807 | 3.40E-11       | 2.34E-10    |
| Tpm4          | 1300.969375 | -2.63271854  | 0.224009315 | -11.75271904 | 6.84E-32       | 2.77E-30    |
| Oscp1         | 46.38116529 | -2.63450311  | 0.444375105 | -5.928556934 | 3.06E-09       | 1.68E-08    |
| Bambi-ps1     | 2.09573157  | -2.635001534 | 1.608106177 | -1.63857435  | 0.101301938    | 0.156049104 |
| Akna          | 158.1967863 | -2.636715612 | 0.274028318 | -9.622055253 | 6.45E-22       | 1.20E-20    |
| 9130008F23Rik | 29.13513541 | -2.637046172 | 0.725230562 | -3.636148708 | 0.000276745    | 0.000774576 |
| Tmprss2       | 367.1080061 | -2.637430749 | 0.339236006 | -7.774619153 | 7.57E-15       | 7.63E-14    |
| Mmp14         | 1757.41279  | -2.637741236 | 0.20533738  | -12.84588921 | 9.07E-38       | 5.71E-36    |
| Arhgap15      | 47.00343161 | -2.638130794 | 0.422230303 | -6.24808493  | 4.16E-10       | 2.52E-09    |
| 9530077C05Rik | 71.87768215 | -2.638132391 | 0.584597282 | -4.512734614 | 6.40E-06       | 2.33E-05    |
| Kcnt1         | 2.131424253 | -2.638216883 | 1.584468307 | -1.665048693 | 0.095903042    | 0.148970848 |
| Slc1a6        | 2.011042755 | -2.638298295 | 1.814329364 | -1.454145177 | 0.145906061    | 0.212817122 |
| Dmp1          | 4.095828593 | -2.638414617 | 1.319365907 | -1.999759584 | 0.045526231    | 0.077815438 |
| Anp32b-ps1    | 1.013278408 | -2.639457764 | 2.193202211 | -1.203472143 | 0.228793665 NA |             |
| Kctd17        | 251.1606953 | -2.639934829 | 0.319005349 | -8.275519018 | 1.28E-16       | 1.52E-15    |
| Il23r         | 0.999776842 | -2.64003538  | 2.135599236 | -1.236203561 | 0.216382907 NA |             |
| Gm17981       | 0.974600163 | -2.640570879 | 2.140716358 | -1.233498716 | 0.217389755 NA |             |
| Nuak1         | 199.9349947 | -2.641290378 | 0.429543199 | -6.149068083 | 7.79E-10       | 4.60E-09    |
| Kif18a        | 43.84819418 | -2.64214388  | 0.495735124 | -5.329749194 | 9.83E-08       | 4.52E-07    |
| Megf11        | 9.701980777 | -2.642656017 | 0.95292046  | -2.773217836 | 0.005550495    | 0.011962685 |
| Bbs12         | 29.82671514 | -2.643527563 | 0.513053981 | -5.152532988 | 2.57E-07       | 1.12E-06    |
| Rasd1         | 12.79614935 | -2.643741571 | 0.999680661 | -2.64458609  | 0.00817909     | 0.016956965 |



|               |             |              |             |              |                |             |
|---------------|-------------|--------------|-------------|--------------|----------------|-------------|
| Fpr2          | 28.74706349 | -2.644479351 | 0.600558404 | -4.403367488 | 1.07E-05       | 3.74E-05    |
| Tnfrsf10b     | 148.8548165 | -2.644637431 | 0.377735231 | -7.001299365 | 2.54E-12       | 1.98E-11    |
| Filip1l       | 307.8816032 | -2.645035737 | 0.226176528 | -11.69456337 | 1.36E-31       | 5.37E-30    |
| Htr7          | 0.99120912  | -2.645487942 | 2.106457733 | -1.255894149 | 0.20915435 NA  |             |
| Rasl11a       | 27.61145674 | -2.645488234 | 0.549075374 | -4.818078465 | 1.45E-06       | 5.72E-06    |
| Gm13212       | 22.58467822 | -2.645890508 | 0.61512644  | -4.301376652 | 1.70E-05       | 5.78E-05    |
| Ly75          | 134.1469589 | -2.646269631 | 0.295424619 | -8.957512206 | 3.32E-19       | 4.96E-18    |
| Pthlh         | 1.009146618 | -2.646519397 | 2.494873836 | -1.060782858 | 0.288788594 NA |             |
| Adcy2         | 23.42355501 | -2.647170547 | 0.736721099 | -3.593178681 | 0.000326668    | 0.000902015 |
| Cdkn2b        | 35.94282862 | -2.647599468 | 0.55989352  | -4.728755332 | 2.26E-06       | 8.66E-06    |
| Dpep1         | 51.96489658 | -2.647954607 | 0.760696463 | -3.480960852 | 0.000499619    | 0.001335868 |
| A630076J17Rik | 2.100386897 | -2.648583774 | 1.653080582 | -1.602210929 | 0.109108974    | 0.166317042 |
| Dnm1          | 30.09838089 | -2.649431963 | 0.661356088 | -4.006059688 | 6.17E-05       | 0.000192809 |
| Elmo1         | 212.0793515 | -2.649754176 | 0.295266957 | -8.974096533 | 2.86E-19       | 4.28E-18    |
| Stard6        | 15.34770501 | -2.650482162 | 0.752924358 | -3.520250253 | 0.00043114     | 0.001165383 |
| Rem2          | 30.74998257 | -2.650699318 | 0.762031717 | -3.478463246 | 0.000504298    | 0.0013469   |
| Daw1          | 1.015909475 | -2.650900273 | 2.095041332 | -1.265321229 | 0.2057562 NA   |             |
| Acsbg1        | 13.12682455 | -2.65168037  | 0.974206777 | -2.721886599 | 0.006491041    | 0.013758457 |
| Duxbl3        | 0.952264278 | -2.652516959 | 2.590109299 | -1.024094605 | 0.305790592 NA |             |
| Tcaf1         | 267.8502454 | -2.653763507 | 0.363276406 | -7.305080828 | 2.77E-13       | 2.39E-12    |
| Rftn1         | 103.8565889 | -2.653931155 | 0.278453619 | -9.530963066 | 1.56E-21       | 2.82E-20    |
| Wnt10b        | 1.915291374 | -2.654186554 | 1.58201128  | -1.677729222 | 0.093399972    | 0.145666702 |
| Gm5936        | 1.004967113 | -2.654791318 | 2.475097715 | -1.07260061  | 0.283450351 NA |             |
| Wdr72         | 19.22084462 | -2.654842919 | 0.868644587 | -3.056305143 | 0.002240831    | 0.005248926 |
| Gm11676       | 1.020638356 | -2.655977383 | 2.596807971 | -1.02278544  | 0.306409304 NA |             |
| Otos          | 1.056952073 | -2.657130044 | 2.224183352 | -1.194654227 | 0.232222153 NA |             |
| Pcdh8         | 1.001527029 | -2.657238897 | 2.480020677 | -1.071458364 | 0.283963382 NA |             |
| Spata9        | 1.025420644 | -2.65799514  | 2.132468938 | -1.246440261 | 0.212602808 NA |             |
| 1500011B03Rik | 100.4871683 | -2.658205963 | 0.42189484  | -6.300636347 | 2.96E-10       | 1.83E-09    |
| Igsf6         | 138.5472354 | -2.658451744 | 0.30556459  | -8.700130279 | 3.32E-18       | 4.56E-17    |
| Fkbp10        | 88.71011083 | -2.664046011 | 0.324088879 | -8.220109316 | 2.03E-16       | 2.37E-15    |
| Ehf           | 153.4847714 | -2.665358548 | 0.365137455 | -7.299603237 | 2.89E-13       | 2.49E-12    |
| Clec2e        | 2.07287953  | -2.665393244 | 1.625315487 | -1.639923612 | 0.101021051    | 0.155686754 |
| Sh3rf3        | 7.308796922 | -2.665664598 | 1.047259518 | -2.545371566 | 0.010916151    | 0.021958531 |
| Gramd2        | 2.006452411 | -2.665787997 | 1.721795796 | -1.548260254 | 0.12155965     | 0.182344822 |
| Gm15896       | 1.046316506 | -2.666351636 | 1.955795819 | -1.36330777  | 0.172785534 NA |             |
| Gpsm1         | 162.9953423 | -2.666483598 | 0.295227265 | -9.031969321 | 1.69E-19       | 2.57E-18    |
| Gm13456       | 10.82399302 | -2.668571452 | 0.937064176 | -2.847800096 | 0.004402257    | 0.009692037 |
| Pcdhb7        | 5.697626926 | -2.668924458 | 1.132991527 | -2.355643793 | 0.018490639    | 0.035040953 |
| Nupr1         | 69.22206012 | -2.669525101 | 0.374658331 | -7.125225523 | 1.04E-12       | 8.48E-12    |
| Taf9b         | 52.65343911 | -2.673103141 | 0.504365551 | -5.299932035 | 1.16E-07       | 5.28E-07    |
| Prkcb         | 87.67356211 | -2.673739317 | 0.41721141  | -6.408485251 | 1.47E-10       | 9.43E-10    |
| Chaf1a        | 116.4356352 | -2.673886731 | 0.452585967 | -5.90801953  | 3.46E-09       | 1.89E-08    |
| Csf2ra        | 429.8449996 | -2.674189081 | 0.260745383 | -10.25594028 | 1.11E-24       | 2.57E-23    |
| Ccl4          | 12.16220242 | -2.675253951 | 0.819928656 | -3.262788697 | 0.001103217    | 0.002760148 |
| Evi2          | 16.73673516 | -2.675500091 | 0.67067634  | -3.989256711 | 6.63E-05       | 0.000206158 |
| Ccnb1         | 136.819037  | -2.675905334 | 0.94175099  | -2.841414942 | 0.004491383    | 0.009870968 |
| Selenon       | 202.4083012 | -2.677756314 | 0.244264747 | -10.96251648 | 5.79E-28       | 1.72E-26    |
| Tubb6         | 422.7016202 | -2.67804557  | 0.284144674 | -9.424936724 | 4.30E-21       | 7.51E-20    |
| Atp8a2        | 31.73944422 | -2.678132214 | 0.798444399 | -3.354187487 | 0.000795984    | 0.002044281 |
| Rnase6        | 41.3783536  | -2.679429634 | 0.50005024  | -5.358320859 | 8.40E-08       | 3.89E-07    |
| Gm13509       | 1.023451778 | -2.682082091 | 2.458926662 | -1.090753186 | 0.275381501 NA |             |
| Sh2d2a        | 21.74819623 | -2.682482444 | 0.580592399 | -4.620250713 | 3.83E-06       | 1.43E-05    |
| Ckap4         | 184.7909078 | -2.682668575 | 0.368978818 | -7.270521901 | 3.58E-13       | 3.06E-12    |
| Ighv5-12      | 1.020595538 | -2.683058503 | 2.531776451 | -1.059753321 | 0.289256838 NA |             |
| Crabp1        | 1.008785202 | -2.683679496 | 2.471746524 | -1.085742195 | 0.277593067 NA |             |
| Gabra4        | 2.238224871 | -2.684582903 | 1.753096208 | -1.531338036 | 0.12568587     | 0.18754422  |
| Gbg1          | 12.98993244 | -2.684744927 | 0.786092122 | -3.415305729 | 0.000637105    | 0.001670721 |
| Cd209d        | 1.068917269 | -2.689078202 | 1.998069088 | -1.345838449 | 0.178354623 NA |             |
| Kcnn4         | 53.22915806 | -2.68969718  | 0.500061626 | -5.378731421 | 7.50E-08       | 3.50E-07    |
| Cryba2        | 1.03428224  | -2.689897066 | 2.128212851 | -1.263922951 | 0.206257683 NA |             |
| Dlg4          | 57.81892904 | -2.690082908 | 0.51619366  | -5.211383083 | 1.87E-07       | 8.38E-07    |
| Chtf18        | 33.62762583 | -2.690574891 | 0.674329142 | -3.990002392 | 6.61E-05       | 0.000205624 |
| Serpina3i     | 11.14350406 | -2.690966092 | 0.889998081 | -3.023563925 | 0.002498162    | 0.005789651 |
| Gm9616        | 2.180897868 | -2.691466593 | 1.707374612 | -1.576377307 | 0.114938875    | 0.174021131 |
| Asphd2        | 1.020431161 | -2.693033358 | 3.028556118 | -0.889213623 | 0.373888283 NA |             |

|               |             |              |             |              |                |             |
|---------------|-------------|--------------|-------------|--------------|----------------|-------------|
| Sulf1         | 55.07056977 | -2.694136289 | 0.353952102 | -7.611584385 | 2.71E-14       | 2.59E-13    |
| Selp1g        | 165.8306431 | -2.695143518 | 0.264836784 | -10.17662076 | 2.52E-24       | 5.63E-23    |
| Ebi3          | 29.98114178 | -2.695427013 | 0.569801626 | -4.730465637 | 2.24E-06       | 8.60E-06    |
| Rnf150        | 74.1741446  | -2.696386459 | 0.383721293 | -7.026939884 | 2.11E-12       | 1.67E-11    |
| Scara3        | 339.6905984 | -2.698339118 | 0.297181529 | -9.079767275 | 1.09E-19       | 1.68E-18    |
| Hcn2          | 45.07452511 | -2.698624411 | 0.499795206 | -5.399460378 | 6.68E-08       | 3.13E-07    |
| Cym           | 5.778133055 | -2.698678509 | 1.125899848 | -2.39690814  | 0.016534068    | 0.031746007 |
| Dok1          | 97.39849679 | -2.699344532 | 0.284063153 | -9.502621183 | 2.05E-21       | 3.67E-20    |
| Il17rd        | 62.45730292 | -2.699370177 | 0.454048548 | -5.945113559 | 2.76E-09       | 1.52E-08    |
| Map4k4        | 894.9797    | -2.699884247 | 0.188195529 | -14.34616573 | 1.13E-46       | 1.32E-44    |
| Crispld2      | 69.48320867 | -2.700097177 | 0.433373875 | -6.230410586 | 4.65E-10       | 2.81E-09    |
| Olfr113       | 1.056022402 | -2.700365815 | 2.619722203 | -1.030783268 | 0.302642466 NA |             |
| Myo1g         | 153.597929  | -2.702401631 | 0.279516579 | -9.668126465 | 4.12E-22       | 7.73E-21    |
| Plekhh1       | 80.55652407 | -2.702832927 | 0.483491089 | -5.590243522 | 2.27E-08       | 1.13E-07    |
| Kifc3         | 2554.303627 | -2.703779568 | 0.211760216 | -12.76811868 | 2.47E-37       | 1.50E-35    |
| Spef1l        | 1.050156381 | -2.705622891 | 2.452655485 | -1.103140212 | 0.269966281 NA |             |
| Gm379         | 45.05526782 | -2.706904628 | 0.557170715 | -4.858303849 | 1.18E-06       | 4.73E-06    |
| Gm2628        | 2.268568962 | -2.707152386 | 1.625657828 | -1.665265802 | 0.095859738    | 0.148917804 |
| Kcna7         | 1.040918837 | -2.707576374 | 2.526637245 | -1.071612626 | 0.28389406 NA  |             |
| Entpd3        | 3.433167106 | -2.708545073 | 1.676167791 | -1.615915236 | 0.106112641    | 0.162242897 |
| Pira2         | 37.31763281 | -2.709162223 | 0.631189632 | -4.292152614 | 1.77E-05       | 6.01E-05    |
| Angpt4        | 3.822926173 | -2.709352682 | 1.397348703 | -1.938923818 | 0.052510615    | 0.088010878 |
| Spata20       | 1.73000736  | -2.709716542 | 1.872444516 | -1.447154519 | 0.147853651    | 0.215234314 |
| Tpt1-ps6      | 2.249093686 | -2.711493252 | 1.624940489 | -1.668672342 | 0.095182333    | 0.14808071  |
| Kif14         | 44.6243581  | -2.711880451 | 0.489631198 | -5.538618575 | 3.05E-08       | 1.49E-07    |
| P3h2          | 180.3128791 | -2.712279024 | 0.413937146 | -6.552393408 | 5.66E-11       | 3.82E-10    |
| Foxs1         | 17.51457627 | -2.713670965 | 0.673364465 | -4.030018078 | 5.58E-05       | 0.000175289 |
| Dynlt1f       | 234.7405823 | -2.714381052 | 0.272788158 | -9.950509121 | 2.51E-23       | 5.18E-22    |
| Boc           | 29.46674122 | -2.715004953 | 0.601536729 | -4.513448345 | 6.38E-06       | 2.32E-05    |
| Fam111a       | 137.6834538 | -2.715370574 | 0.407370029 | -6.66561205  | 2.64E-11       | 1.84E-10    |
| Snx31         | 2.297137367 | -2.716665624 | 1.699705444 | -1.598315539 | 0.109972771    | 0.167528889 |
| Btk           | 55.18161681 | -2.717011743 | 0.396158651 | -6.858393057 | 6.96E-12       | 5.19E-11    |
| Pilra         | 139.2338521 | -2.718317284 | 0.555505345 | -4.893413368 | 9.91E-07       | 4.00E-06    |
| Mcoln2        | 8.771978123 | -2.71844767  | 0.924890233 | -2.939211133 | 0.003290488    | 0.00745069  |
| Rab34         | 514.1671732 | -2.719192087 | 0.261051414 | -10.41630858 | 2.09E-25       | 5.07E-24    |
| Hspg2         | 1261.165006 | -2.719251233 | 0.277846089 | -9.786897627 | 1.28E-22       | 2.51E-21    |
| Patz1         | 338.2341739 | -2.721790503 | 0.28721287  | -9.476561778 | 2.63E-21       | 4.67E-20    |
| Lrguk         | 2.818622064 | -2.723363405 | 1.473330621 | -1.848440103 | 0.064538702    | 0.105325233 |
| Emp3          | 117.97247   | -2.723515151 | 0.350889692 | -7.761741683 | 8.38E-15       | 8.41E-14    |
| Cyba          | 351.4771871 | -2.72521572  | 0.224111296 | -12.16009978 | 5.07E-34       | 2.42E-32    |
| Nfasc         | 75.73688128 | -2.726478539 | 0.798812741 | -3.413163559 | 0.000642134    | 0.001682099 |
| Ifi205        | 32.36101243 | -2.726554426 | 0.507782999 | -5.369526806 | 7.89E-08       | 3.67E-07    |
| Kcnn1         | 1.093345482 | -2.726869106 | 2.5703207   | -1.060906176 | 0.288732542 NA |             |
| Plekhs1       | 42.56515092 | -2.728002047 | 0.558092058 | -4.88808613  | 1.02E-06       | 4.10E-06    |
| P2rx5         | 14.98442527 | -2.729121768 | 0.791076703 | -3.449882618 | 0.00056083     | 0.001485786 |
| Nuf2          | 87.90712074 | -2.729555389 | 1.174886656 | -2.323249972 | 0.020165728    | 0.037853482 |
| Gm12351       | 1.07928236  | -2.731305557 | 2.121775392 | -1.287273651 | 0.197998924 NA |             |
| Crip1         | 312.7621584 | -2.731329217 | 0.259323638 | -10.53251158 | 6.12E-26       | 1.54E-24    |
| Adcy7         | 331.5672635 | -2.732164549 | 0.242475212 | -11.2678097  | 1.89E-29       | 6.34E-28    |
| Tppp3         | 40.9172519  | -2.732805994 | 0.551608    | -4.954253738 | 7.26E-07       | 2.99E-06    |
| Cysl1r1       | 53.56920845 | -2.733598577 | 0.510749132 | -5.352135534 | 8.69E-08       | 4.02E-07    |
| Igkv2-112     | 1.093691131 | -2.733641567 | 2.23622659  | -1.222434962 | 0.221543185 NA |             |
| BC035044      | 14.75871174 | -2.734436115 | 0.920305361 | -2.971226976 | 0.002966125    | 0.006775626 |
| Ptprn         | 7.722724381 | -2.734996444 | 1.212789777 | -2.255128215 | 0.024125282    | 0.044391561 |
| Ntn4          | 362.8084588 | -2.735364661 | 0.259265314 | -10.55044589 | 5.06E-26       | 1.28E-24    |
| Akap12        | 213.4369093 | -2.736543701 | 0.353115526 | -7.749712198 | 9.21E-15       | 9.21E-14    |
| Rab6b         | 56.00147843 | -2.737024228 | 0.513403035 | -5.331141503 | 9.76E-08       | 4.49E-07    |
| Eid2          | 41.45141581 | -2.737457979 | 0.434998207 | -6.293032782 | 3.11E-10       | 1.92E-09    |
| 4921507P07Rik | 17.1866858  | -2.738134558 | 0.703484143 | -3.892247729 | 9.93E-05       | 0.000300533 |
| Igkv16-104    | 5.914428957 | -2.738706749 | 1.269829303 | -2.15675189  | 0.031025002    | 0.055464999 |
| Vcam1         | 609.6637203 | -2.73901269  | 0.168195315 | -16.28471457 | 1.27E-59       | 3.00E-57    |
| Slc11a1       | 301.8434998 | -2.739236627 | 0.344049161 | -7.961759366 | 1.70E-15       | 1.83E-14    |
| Trac          | 28.00494857 | -2.742361612 | 0.678177209 | -4.043724229 | 5.26E-05       | 0.000166026 |
| Lratd2        | 616.0855899 | -2.742813812 | 0.300840156 | -9.117179861 | 7.71E-20       | 1.21E-18    |
| Dppa2         | 2.142787182 | -2.743322339 | 1.713014336 | -1.601459067 | 0.109275279    | 0.166555651 |
| Cfap161       | 1.100178423 | -2.746384881 | 2.117397619 | -1.297056753 | 0.19461166 NA  |             |

|               |             |              |             |              |                |             |
|---------------|-------------|--------------|-------------|--------------|----------------|-------------|
| Rpp25         | 17.88247776 | -2.747103656 | 0.888512094 | -3.091802211 | 0.001989454    | 0.004704629 |
| Adamts2       | 328.3134856 | -2.747967038 | 0.21786681  | -12.61305951 | 1.79E-36       | 1.03E-34    |
| Emp2          | 864.2999028 | -2.748491333 | 0.23060391  | -11.91866751 | 9.46E-33       | 4.07E-31    |
| Bmp6          | 298.1582029 | -2.748663101 | 0.310100756 | -8.863774254 | 7.74E-19       | 1.12E-17    |
| L1cam         | 9.346859768 | -2.748834485 | 0.891830659 | -3.082238154 | 0.002054504    | 0.004845094 |
| 5430437J10Rik | 11.51469508 | -2.749302046 | 1.038856604 | -2.646469239 | 0.00813369     | 0.016877209 |
| Gm8805        | 2.313804858 | -2.749326152 | 1.624332141 | -1.692588654 | 0.090533792    | 0.142003353 |
| Gdf6          | 54.92980428 | -2.750344604 | 0.429266669 | -6.407077001 | 1.48E-10       | 9.51E-10    |
| Eps8          | 151.0823007 | -2.750440474 | 0.28138141  | -9.774776784 | 1.44E-22       | 2.82E-21    |
| Col9a2        | 2.239533762 | -2.752801511 | 1.614507782 | -1.70504072  | 0.08818683     | 0.138742071 |
| Cttnbp2       | 53.71603547 | -2.752935392 | 0.558135157 | -4.93238127  | 8.12E-07       | 3.33E-06    |
| Col15a1       | 651.7936386 | -2.752981381 | 0.396471824 | -6.943699936 | 3.82E-12       | 2.93E-11    |
| Igfbp3        | 1534.919028 | -2.754358578 | 0.331129331 | -8.318074917 | 8.94E-17       | 1.08E-15    |
| H2ac12        | 1.071717217 | -2.756276528 | 2.457043756 | -1.121785691 | 0.261953572 NA |             |
| Psmc3ip       | 19.79004646 | -2.756610608 | 0.71555753  | -3.852395499 | 0.000116968    | 0.000349285 |
| Gm6517        | 1.098450125 | -2.756734505 | 2.552194164 | -1.080142939 | 0.280078533 NA |             |
| Il17d         | 4.339793917 | -2.757139788 | 1.479673821 | -1.863342954 | 0.06241403     | 0.102252008 |
| Gfpt2         | 33.88482196 | -2.757838776 | 0.6342507   | -4.348184045 | 1.37E-05       | 4.74E-05    |
| Pirb          | 293.2989109 | -2.75821835  | 0.253195263 | -10.89364123 | 1.24E-27       | 3.56E-26    |
| Prdm6         | 2.137635526 | -2.759399082 | 1.818716511 | -1.517223308 | 0.129210313    | 0.191979904 |
| Rpl9-ps4      | 1.097017297 | -2.759524674 | 3.05305854  | -0.903855802 | 0.366071868 NA |             |
| Prx           | 17.11780195 | -2.760335847 | 0.686067758 | -4.023415783 | 5.74E-05       | 0.000179953 |
| Pik3r5        | 75.98736021 | -2.760480576 | 0.319661514 | -8.635636301 | 5.84E-18       | 7.87E-17    |
| Npy6r         | 1.095926297 | -2.761837134 | 3.150083865 | -0.876750351 | 0.380622252 NA |             |
| Foxo6         | 2.242293021 | -2.761890236 | 1.725060894 | -1.601039271 | 0.109368222    | 0.16668241  |
| Ighv1-31      | 1.099056835 | -2.761965213 | 3.052185002 | -0.90491409  | 0.365510902 NA |             |
| Hcls1         | 340.1678321 | -2.762126041 | 0.325113271 | -8.495888326 | 1.96E-17       | 2.53E-16    |
| Siglec1       | 278.0505889 | -2.762999582 | 0.438175072 | -6.305697791 | 2.87E-10       | 1.78E-09    |
| Ckb           | 350.3187847 | -2.763758145 | 0.288567122 | -9.577522649 | 9.94E-22       | 1.83E-20    |
| Mex3b         | 28.72784407 | -2.765105523 | 0.519505531 | -5.322571869 | 1.02E-07       | 4.69E-07    |
| St8sia4       | 54.49609523 | -2.765128116 | 0.450194104 | -6.142079803 | 8.14E-10       | 4.79E-09    |
| Cenpi         | 44.10191374 | -2.765537435 | 0.55470895  | -4.985564838 | 6.18E-07       | 2.56E-06    |
| Zfp853        | 6.487363999 | -2.766272364 | 1.034679191 | -2.673555618 | 0.007505183    | 0.015701112 |
| Notch3        | 90.3647028  | -2.766354101 | 0.450641714 | -6.138699581 | 8.32E-10       | 4.89E-09    |
| Tcf19         | 150.3363657 | -2.766917428 | 0.395287188 | -6.999765004 | 2.56E-12       | 2.00E-11    |
| Apbb1         | 64.20336751 | -2.767129168 | 0.413366464 | -6.694130768 | 2.17E-11       | 1.53E-10    |
| Fcamr         | 7.159240187 | -2.769044304 | 1.417562793 | -1.953383877 | 0.050774125    | 0.085541781 |
| Gm11027       | 2.21094068  | -2.769677719 | 1.779736714 | -1.556228906 | 0.11965367     | 0.179960809 |
| Gpr55         | 14.9174197  | -2.769678768 | 0.726643972 | -3.811603583 | 0.000138068    | 0.000407794 |
| Ppm1e         | 3.081976463 | -2.772084912 | 1.520143771 | -1.82356759  | 0.06821747     | 0.110662793 |
| Cyp27b1       | 2.386762364 | -2.772289857 | 1.639952248 | -1.690469865 | 0.090938099    | 0.142478881 |
| Slc16a3       | 38.41750433 | -2.772450419 | 0.595337925 | -4.656935674 | 3.21E-06       | 1.21E-05    |
| Gm44336       | 1.119871292 | -2.772610911 | 2.236580675 | -1.239665058 | 0.215099307 NA |             |
| Tmem191c      | 125.4312437 | -2.773113016 | 0.497584702 | -5.573147654 | 2.50E-08       | 1.24E-07    |
| Map1b         | 45.62471    | -2.773291418 | 0.492298702 | -5.633351068 | 1.77E-08       | 8.88E-08    |
| Dscam1        | 6.136022002 | -2.774491062 | 1.245786031 | -2.227100796 | 0.025940538    | 0.047307905 |
| Apba1         | 22.39275922 | -2.775293462 | 0.577491562 | -4.805773186 | 1.54E-06       | 6.05E-06    |
| Marcks1       | 698.9752305 | -2.776449875 | 0.299028305 | -9.284906591 | 1.62E-20       | 2.69E-19    |
| Cyp3a44       | 32.37463888 | -2.776882434 | 0.650566374 | -4.268407567 | 1.97E-05       | 6.64E-05    |
| Mis18bp1      | 44.28246497 | -2.776988945 | 0.626561125 | -4.432111783 | 9.33E-06       | 3.31E-05    |
| Igkv17-127    | 8.144500136 | -2.776996904 | 1.274647597 | -2.178638951 | 0.0293585      | 0.052751234 |
| Ehd4          | 444.7469137 | -2.777008796 | 0.23010033  | -12.0686867  | 1.55E-33       | 7.08E-32    |
| Padi2         | 48.73744202 | -2.777284181 | 0.417965787 | -6.644764405 | 3.04E-11       | 2.10E-10    |
| Oas1a         | 229.1458115 | -2.778262524 | 0.394119054 | -7.049297658 | 1.80E-12       | 1.43E-11    |
| Sphk1         | 49.57070258 | -2.779178016 | 0.499045533 | -5.568986856 | 2.56E-08       | 1.26E-07    |
| Mcm2          | 272.6176    | -2.779492548 | 0.444227089 | -6.25691818  | 3.93E-10       | 2.39E-09    |
| Phf11b        | 59.75521887 | -2.779753508 | 0.572919695 | -4.851907753 | 1.22E-06       | 4.87E-06    |
| Gm7729        | 1.10061204  | -2.779843402 | 2.455943017 | -1.131884324 | 0.25768307 NA  |             |
| Icam1         | 930.889102  | -2.780035145 | 0.217206975 | -12.79901417 | 1.66E-37       | 1.02E-35    |
| Ift57         | 116.3560484 | -2.780144311 | 0.45526731  | -6.106619674 | 1.02E-09       | 5.93E-09    |
| Gm10051       | 1.124638543 | -2.780308867 | 2.120463265 | -1.311179926 | 0.189796983 NA |             |
| 1700028B04Rik | 1.093386253 | -2.780336706 | 2.09858768  | -1.324860873 | 0.1852173 NA   |             |
| Wnt16         | 5.098644226 | -2.780538405 | 1.348527511 | -2.061907068 | 0.039216585    | 0.068234776 |
| Npr3          | 129.9818877 | -2.781488369 | 0.93011086  | -2.990491231 | 0.002785291    | 0.006393382 |
| Ighv1-84      | 1.121806923 | -2.7818357   | 2.239607222 | -1.242108738 | 0.214196445 NA |             |
| Slc7a7        | 172.9787391 | -2.782750279 | 0.310906691 | -8.950435496 | 3.54E-19       | 5.28E-18    |

|            |             |              |             |              |             |    |             |
|------------|-------------|--------------|-------------|--------------|-------------|----|-------------|
| Pdcd1lg2   | 1.099006987 | -2.7831545   | 2.429120436 | -1.145745784 | 0.251900354 | NA |             |
| Soga1      | 108.9981316 | -2.783216629 | 0.455776175 | -6.106542598 | 1.02E-09    |    | 5.93E-09    |
| Cacna2d4   | 38.00518358 | -2.783417145 | 0.659087587 | -4.223136955 | 2.41E-05    |    | 8.03E-05    |
| Abcg3      | 109.8463082 | -2.78358275  | 0.573598145 | -4.85280209  | 1.22E-06    |    | 4.85E-06    |
| Pnck       | 16.55686184 | -2.784004695 | 1.045455427 | -2.662958767 | 0.00774569  |    | 0.016148775 |
| Prkd1      | 6.376780433 | -2.784292568 | 1.090847118 | -2.552413185 | 0.010697957 |    | 0.021555226 |
| Dlgap3     | 14.6497383  | -2.786135532 | 1.031643393 | -2.700676949 | 0.006919852 |    | 0.014574948 |
| Abcc1      | 125.6973492 | -2.786155699 | 0.30420234  | -9.158889761 | 5.24E-20    |    | 8.35E-19    |
| Zfp429     | 41.8533977  | -2.786350756 | 0.545768346 | -5.105372593 | 3.30E-07    |    | 1.42E-06    |
| Rpl31-ps17 | 1.107709021 | -2.787402808 | 2.085274318 | -1.336707974 | 0.181317978 | NA |             |
| Gm8172     | 1.073931663 | -2.788084473 | 2.184016016 | -1.276586093 | 0.201748414 | NA |             |
| Tead1      | 1062.046865 | -2.788101584 | 0.33275381  | -8.378872015 | 5.34E-17    |    | 6.59E-16    |
| Ptpr       | 6.368560733 | -2.789038477 | 1.326140432 | -2.103124534 | 0.035454885 |    | 0.062300029 |
| Slc43a2    | 718.7364984 | -2.789452844 | 0.280004724 | -9.962163507 | 2.23E-23    |    | 4.62E-22    |
| Fmr1nb     | 67.06664862 | -2.789988374 | 1.977747568 | -1.410689827 | NA          | NA |             |
| Lgi2       | 34.97493733 | -2.791992917 | 0.639723598 | -4.364373808 | 1.27E-05    |    | 4.42E-05    |
| Gm6988     | 1.135108317 | -2.793047526 | 2.156221076 | -1.295343765 | 0.195201668 | NA |             |
| Plcd1      | 37.21782597 | -2.79345386  | 0.500173106 | -5.584974135 | 2.34E-08    |    | 1.16E-07    |
| Pole2      | 27.59490474 | -2.793904075 | 0.583047245 | -4.79189997  | 1.65E-06    |    | 6.47E-06    |
| Nek5       | 30.12107887 | -2.794323625 | 0.532124921 | -5.251254953 | 1.51E-07    |    | 6.80E-07    |
| Card14     | 10.34328226 | -2.794638175 | 1.145977156 | -2.438650858 | 0.014742204 |    | 0.028657365 |
| Gm6430     | 1.122294137 | -2.794862523 | 2.073160943 | -1.348116523 | 0.177620908 | NA |             |
| Spi1       | 263.7273094 | -2.795029102 | 0.356363072 | -7.843206338 | 4.39E-15    |    | 4.52E-14    |
| Prss57     | 1.190182804 | -2.795208927 | 2.590392745 | -1.079067617 | 0.280557586 | NA |             |
| Trbv13-2   | 1.114915141 | -2.795500548 | 2.101331252 | -1.330347391 | 0.18340384  | NA |             |
| H1f10      | 32.97416805 | -2.795712782 | 0.50567319  | -5.528694891 | 3.23E-08    |    | 1.57E-07    |
| Tmem169    | 18.19074416 | -2.795863069 | 0.654457762 | -4.272029814 | 1.94E-05    |    | 6.54E-05    |
| Abhd2      | 3688.112146 | -2.795872802 | 0.274732436 | -10.17671173 | 2.52E-24    |    | 5.63E-23    |
| Dock2      | 157.7082928 | -2.797746741 | 0.477307263 | -5.86152141  | 4.59E-09    |    | 2.47E-08    |
| Bend6      | 6.120270535 | -2.797942697 | 1.181053939 | -2.369021943 | 0.017835195 |    | 0.033961176 |
| Gprc6a     | 1.121133362 | -2.798313232 | 2.594478515 | -1.078564812 | 0.280781775 | NA |             |
| Gm16485    | 2.231887408 | -2.798970002 | 1.906824872 | -1.467869464 | 0.142139684 |    | 0.20792838  |
| Ccr11      | 2.339303088 | -2.799299562 | 1.705367201 | -1.641464408 | 0.10070105  |    | 0.155305907 |
| Gm11188    | 1.131385924 | -2.799501605 | 1.87200689  | -1.495454755 | 0.1347958   | NA |             |
| Hmgbl-ps5  | 1.132680027 | -2.799574285 | 1.838321513 | -1.522896982 | 0.127784481 | NA |             |
| Brinp3     | 2.112769389 | -2.799752888 | 1.780613181 | -1.572353231 | 0.115868654 |    | 0.175273187 |
| Sorcs3     | 1.092328795 | -2.801002177 | 2.979288412 | -0.940158115 | 0.347136463 | NA |             |
| Gm13864    | 2.313881162 | -2.801014528 | 1.737124847 | -1.612442844 | 0.106865608 |    | 0.163306282 |
| Slc6a8     | 549.2380454 | -2.801625848 | 0.368314604 | -7.606610818 | 2.81E-14    |    | 2.69E-13    |
| H2-Q1      | 1480.627746 | -2.802395203 | 0.256776537 | -10.91375106 | 9.91E-28    |    | 2.89E-26    |
| Stk10      | 212.5703929 | -2.802794775 | 0.239484061 | -11.70347105 | 1.22E-31    |    | 4.85E-30    |
| Fermt3     | 265.7586204 | -2.803174864 | 0.276843719 | -10.12547754 | 4.26E-24    |    | 9.32E-23    |
| Fbln2      | 170.3127598 | -2.803680548 | 0.347681719 | -8.063928581 | 7.39E-16    |    | 8.20E-15    |
| Sit1       | 2.602971004 | -2.804148252 | 1.483444013 | -1.890295979 | 0.058718386 |    | 0.096980338 |
| Lilr4b     | 304.0262432 | -2.8042618   | 0.374870328 | -7.480618204 | 7.40E-14    |    | 6.77E-13    |
| Gcsam      | 5.875697729 | -2.805609864 | 1.307014216 | -2.146579456 | 0.031826777 |    | 0.05677929  |
| Gm5073     | 1.124887288 | -2.806096861 | 2.161370823 | -1.298294967 | 0.194185995 | NA |             |
| Tm6sf1     | 139.9241576 | -2.808081094 | 0.334477923 | -8.395415367 | 4.64E-17    |    | 5.78E-16    |
| Pea15a     | 1086.897977 | -2.80811421  | 0.227602363 | -12.33780779 | 5.67E-35    |    | 2.89E-33    |
| Zscan30    | 3.777715251 | -2.808194689 | 1.421680206 | -1.975264674 | 0.04823812  |    | 0.081876092 |
| Ajuba      | 987.3391708 | -2.809797307 | 0.209665867 | -13.40131012 | 5.94E-41    |    | 4.85E-39    |
| Cdhr4      | 2.073846642 | -2.810603373 | 1.552199914 | -1.810722541 | 0.070183812 |    | 0.113422469 |
| Mdh1b      | 2.325788016 | -2.811058235 | 1.711387669 | -1.642560763 | 0.100473845 |    | 0.154983542 |
| Ssbp4      | 328.8962682 | -2.812297147 | 0.261304551 | -10.76252645 | 5.17E-27    |    | 1.42E-25    |
| Kif11      | 178.2849859 | -2.813935105 | 0.508310158 | -5.535862426 | 3.10E-08    |    | 1.51E-07    |
| Lama2      | 109.328912  | -2.814404826 | 0.347171286 | -8.106675119 | 5.20E-16    |    | 5.84E-15    |
| Chgb       | 1.087730458 | -2.815675907 | 2.604067349 | -1.081260785 | 0.279581126 | NA |             |
| Hs3st1     | 14.81991882 | -2.816105393 | 0.782935618 | -3.596854364 | 0.000322089 |    | 0.000889658 |
| Fxyd2      | 4.057211553 | -2.816137097 | 1.24306955  | -2.265470261 | 0.023483837 |    | 0.04336478  |
| Hexb       | 908.9897403 | -2.816327152 | 0.208048692 | -13.53686547 | 9.47E-42    |    | 8.04E-40    |
| Gm8483     | 1.150244315 | -2.816351432 | 1.839331496 | -1.531182083 | 0.125724398 | NA |             |
| Fgf18      | 4.240850269 | -2.816916011 | 1.272979041 | -2.212853409 | 0.026907754 |    | 0.048907283 |
| Mamld1     | 68.41402785 | -2.817827814 | 0.457953421 | -6.153088255 | 7.60E-10    |    | 4.49E-09    |
| Rasa4      | 175.6175186 | -2.819949102 | 0.313197873 | -9.00373006  | 2.18E-19    |    | 3.29E-18    |
| Map3k12    | 126.7640957 | -2.821243784 | 0.422797057 | -6.672808479 | 2.51E-11    |    | 1.75E-10    |
| Lrrc15     | 6.119587723 | -2.821922374 | 1.179713965 | -2.392039475 | 0.01675504  |    | 0.032112414 |

|               |             |              |             |              |                |             |
|---------------|-------------|--------------|-------------|--------------|----------------|-------------|
| Rad51b        | 62.51669581 | -2.822775614 | 0.546973876 | -5.160713774 | 2.46E-07       | 1.08E-06    |
| Nos1ap        | 86.22581647 | -2.823644743 | 0.474603697 | -5.949479029 | 2.69E-09       | 1.49E-08    |
| Trim36        | 19.68506339 | -2.824870143 | 0.620702679 | -4.551084178 | 5.34E-06       | 1.96E-05    |
| Frzb          | 94.01669763 | -2.824876422 | 0.338356629 | -8.348813593 | 6.90E-17       | 8.40E-16    |
| Cd200r1       | 28.19970388 | -2.825072567 | 0.56113391  | -5.034578232 | 4.79E-07       | 2.01E-06    |
| Gcnt1         | 60.40315764 | -2.825903731 | 0.401530177 | -7.037836492 | 1.95E-12       | 1.55E-11    |
| Tmem45a       | 68.89697417 | -2.82804665  | 0.496778444 | -5.692772472 | 1.25E-08       | 6.40E-08    |
| Kcnj2         | 55.4264185  | -2.828190612 | 0.435059401 | -6.500699913 | 7.99E-11       | 5.29E-10    |
| Msn           | 1438.50249  | -2.828413925 | 0.290686081 | -9.730131962 | 2.24E-22       | 4.30E-21    |
| Gm16103       | 1.164863156 | -2.832307596 | 1.887978436 | -1.500180056 | 0.133567768 NA |             |
| Ifitm6        | 11.19401784 | -2.832923427 | 0.820271178 | -3.453642532 | 0.00055307     | 0.001466366 |
| BC030867      | 18.96173971 | -2.832943344 | 0.778357267 | -3.639643986 | 0.000273015    | 0.000764891 |
| Card9         | 73.63452737 | -2.833123717 | 0.359301321 | -7.885091286 | 3.14E-15       | 3.28E-14    |
| Mef2c         | 138.5014533 | -2.833974444 | 0.380334586 | -7.451266726 | 9.24E-14       | 8.39E-13    |
| Syde1         | 360.6462052 | -2.834459373 | 0.244060757 | -11.61374491 | 3.51E-31       | 1.35E-29    |
| Runx2         | 41.90140955 | -2.834498583 | 0.488139384 | -5.806740198 | 6.37E-09       | 3.37E-08    |
| Col2a1        | 1.350615805 | -2.834833525 | 2.30787641  | -1.228329867 | 0.219323163 NA |             |
| Tnc           | 52.10068993 | -2.83495066  | 0.51070887  | -5.551011201 | 2.84E-08       | 1.39E-07    |
| Eif5a2        | 22.26270072 | -2.83553229  | 0.591962244 | -4.790055987 | 1.67E-06       | 6.52E-06    |
| Samd10        | 175.1405948 | -2.835669712 | 0.253612426 | -11.18111504 | 5.05E-29       | 1.62E-27    |
| Cd84          | 220.8743262 | -2.835722052 | 0.225215031 | -12.5911758  | 2.36E-36       | 1.34E-34    |
| Gm15821       | 1.132926676 | -2.835993032 | 1.84306147  | -1.53874034  | 0.1238677 NA   |             |
| Lox1          | 213.1768954 | -2.836382088 | 0.260376325 | -10.89339475 | 1.24E-27       | 3.56E-26    |
| Fam13c        | 37.12839902 | -2.836946088 | 0.516104177 | -5.496847761 | 3.87E-08       | 1.86E-07    |
| Insr          | 1.167337141 | -2.837529592 | 2.178792903 | -1.302340203 | 0.192800114 NA |             |
| Tmem240       | 10.35225104 | -2.83763855  | 0.915145039 | -3.100752807 | 0.001930294    | 0.004576227 |
| Ighv8-8       | 2.330786648 | -2.838249869 | 1.898286046 | -1.49516448  | 0.134871521    | 0.198952124 |
| Aif1          | 253.575317  | -2.838496301 | 0.426805609 | -6.650559976 | 2.92E-11       | 2.03E-10    |
| Hmga2         | 19.96763266 | -2.842627621 | 0.769709652 | -3.693116765 | 0.000221522    | 0.000631735 |
| Siglecf       | 7.890058711 | -2.846488883 | 1.064528939 | -2.673942228 | 0.007496536    | 0.015686873 |
| Ces1h         | 1.160753886 | -2.846623888 | 2.50848107  | -1.134799829 | 0.256459198 NA |             |
| Ap1s2         | 177.3782162 | -2.846664963 | 0.327772301 | -8.684885691 | 3.79E-18       | 5.16E-17    |
| Rnf122        | 76.07597065 | -2.847031237 | 0.399329601 | -7.129527163 | 1.01E-12       | 8.23E-12    |
| Gpr68         | 9.754020051 | -2.847597286 | 0.904548605 | -3.148086539 | 0.00164343     | 0.003963389 |
| Pik3ip1       | 82.77502098 | -2.848482544 | 0.615587295 | -4.627260126 | 3.71E-06       | 1.39E-05    |
| Arrb1         | 696.3452033 | -2.848594648 | 0.272266757 | -10.46251361 | 1.28E-25       | 3.17E-24    |
| Lsp1          | 232.7795962 | -2.84876792  | 0.274624157 | -10.37333332 | 3.28E-25       | 7.85E-24    |
| Ptpn18        | 129.6607111 | -2.8493735   | 0.281292908 | -10.12956041 | 4.08E-24       | 8.96E-23    |
| Olfra460      | 1.165028701 | -2.849410232 | 2.043612902 | -1.394300373 | 0.163226918 NA |             |
| Cc3a2         | 13.89363896 | -2.849503631 | 0.862197427 | -3.304931727 | 0.000949995    | 0.002407898 |
| Dkl1          | 1.157119128 | -2.849540785 | 2.021634409 | -1.409523291 | 0.158680491 NA |             |
| Ncapd2        | 386.8834522 | -2.8502908   | 0.39951094  | -7.134449929 | 9.72E-13       | 7.96E-12    |
| Fhod1         | 701.2784558 | -2.850351526 | 0.25277825  | -11.27609487 | 1.72E-29       | 5.81E-28    |
| Neu3          | 132.7036795 | -2.851200965 | 0.509548595 | -5.595542783 | 2.20E-08       | 1.09E-07    |
| Ak1           | 51.63558167 | -2.852459046 | 0.49762581  | -5.732136453 | 9.92E-09       | 5.15E-08    |
| Nradd         | 85.34438634 | -2.854586332 | 0.323881777 | -8.813667624 | 1.21E-18       | 1.73E-17    |
| Peg12         | 4.573520047 | -2.854588817 | 1.226187135 | -2.328020525 | 0.019911014    | 0.037424803 |
| Irf4          | 13.5990719  | -2.856600646 | 0.769439545 | -3.712573214 | 0.000205163    | 0.000588131 |
| Cfap47        | 1.431114393 | -2.857716811 | 2.042888758 | -1.398860706 | 0.161854758 NA |             |
| Cxcr6         | 21.6976037  | -2.858361452 | 0.762084885 | -3.750712694 | 0.000176333    | 0.000511506 |
| Adamts1       | 704.4776167 | -2.858710906 | 0.357812269 | -7.989415542 | 1.36E-15       | 1.47E-14    |
| Cdca8         | 98.77760573 | -2.858774331 | 0.509077543 | -5.61559701  | 1.96E-08       | 9.81E-08    |
| 2700099C18Rik | 39.4901512  | -2.85894086  | 0.620878241 | -4.604672336 | 4.13E-06       | 1.54E-05    |
| Lrrc73        | 12.75682901 | -2.858948936 | 0.897205412 | -3.186504338 | 0.001440033    | 0.003517345 |
| Trerf1        | 24.10679218 | -2.859272868 | 0.563069411 | -5.07801136  | 3.81E-07       | 1.62E-06    |
| Slc15a3       | 192.5196216 | -2.859408899 | 0.398578709 | -7.174013152 | 7.28E-13       | 6.06E-12    |
| Ms4a4b        | 53.99399712 | -2.863047659 | 0.729945768 | -3.922274482 | 8.77E-05       | 0.000267945 |
| Cdon          | 100.8266108 | -2.86336039  | 0.341310727 | -8.389306767 | 4.89E-17       | 6.05E-16    |
| H2bc9         | 9.109382622 | -2.863886133 | 0.887634976 | -3.22642326  | 0.001253478    | 0.003102846 |
| Ighv5-15      | 1.140238898 | -2.864197784 | 2.971421521 | -0.963915003 | 0.335088541 NA |             |
| Nhs           | 23.85507697 | -2.864657703 | 0.630348704 | -4.544560316 | 5.51E-06       | 2.02E-05    |
| ltgae         | 18.68936454 | -2.86614608  | 0.680045715 | -4.214637365 | 2.50E-05       | 8.31E-05    |
| Gm14874       | 1.183424735 | -2.86821671  | 2.099148185 | -1.366371717 | 0.171822321 NA |             |
| Neto2         | 26.77114163 | -2.869322696 | 0.796514232 | -3.602349566 | 0.000315354    | 0.000872044 |
| Runx1t1       | 15.23720099 | -2.869958156 | 0.799705762 | -3.588767635 | 0.000332245    | 0.00091519  |
| Chst8         | 16.28441326 | -2.869996157 | 0.871562209 | -3.292933229 | 0.00099148     | 0.002502629 |



|               |             |              |             |              |                |             |
|---------------|-------------|--------------|-------------|--------------|----------------|-------------|
| Fank1         | 2.51494302  | -2.870314576 | 1.604419898 | -1.789004599 | 0.073614075    | 0.118259777 |
| Amot          | 695.5293517 | -2.871251913 | 0.250609853 | -11.45705917 | 2.17E-30       | 7.86E-29    |
| Sema5a        | 162.7645472 | -2.871402112 | 0.3340604   | -8.595457934 | 8.29E-18       | 1.10E-16    |
| Hoxd8         | 1.214863833 | -2.871758281 | 2.436538403 | -1.178622211 | 0.238548643 NA |             |
| Cxhc4         | 26.2009522  | -2.872110761 | 0.875329308 | -3.28117742  | 0.001033747    | 0.00259816  |
| Ankrd13d      | 22.23829439 | -2.872422747 | 0.692501447 | -4.147894217 | 3.36E-05       | 0.000109293 |
| Scn1b         | 188.736777  | -2.872650475 | 0.295421193 | -9.723914667 | 2.38E-22       | 4.56E-21    |
| Pitpnm1       | 422.6490287 | -2.873797094 | 0.264213559 | -10.87679641 | 1.49E-27       | 4.24E-26    |
| Mpeg1         | 3187.403256 | -2.875809938 | 0.273821425 | -10.50250153 | 8.41E-26       | 2.10E-24    |
| Gm7443        | 1.186638657 | -2.876997944 | 2.022938912 | -1.422187258 | 0.154971897 NA |             |
| Fbxo2         | 20.15378367 | -2.877891634 | 0.905155151 | -3.179445679 | 0.00147557     | 0.003593133 |
| Cotl1         | 644.640844  | -2.878607985 | 0.280796692 | -10.25157371 | 1.16E-24       | 2.68E-23    |
| Gbx2          | 2.521151411 | -2.880555008 | 1.550537602 | -1.857778234 | 0.063200513    | 0.103401377 |
| Gm6682        | 1.190888706 | -2.8810378   | 2.02288602  | -1.424221519 | 0.154382358 NA |             |
| Paqr4         | 96.8420237  | -2.881970653 | 0.374561554 | -7.694251109 | 1.42E-14       | 1.40E-13    |
| Tgfb1         | 292.2679579 | -2.882176718 | 0.265145003 | -10.87019061 | 1.60E-27       | 4.54E-26    |
| Snn           | 101.3639316 | -2.882460429 | 0.34845984  | -8.272001821 | 1.32E-16       | 1.56E-15    |
| Cdca3         | 320.7263202 | -2.882506336 | 0.457764747 | -6.296916392 | 3.04E-10       | 1.88E-09    |
| Tnfrsf19      | 468.6327875 | -2.886340086 | 0.306644052 | -9.412672661 | 4.84E-21       | 8.40E-20    |
| Ppp1r9b       | 565.8396689 | -2.887155132 | 0.189904312 | -15.20320998 | 3.37E-52       | 5.42E-50    |
| 9930022D16Rik | 1.203160778 | -2.888160136 | 1.811204081 | -1.59460779  | 0.11079997 NA  |             |
| P4ha3         | 9.472290245 | -2.889963413 | 0.927665573 | -3.115307389 | 0.001837533    | 0.004376691 |
| Mmp11         | 115.2522747 | -2.890725977 | 0.435199069 | -6.64230735  | 3.09E-11       | 2.14E-10    |
| Ighv1-47      | 1.21913534  | -2.890843374 | 2.080159701 | -1.389721844 | 0.164613359 NA |             |
| Ggt7          | 34.42521108 | -2.891057499 | 0.71809069  | -4.026033952 | 5.67E-05       | 0.000178062 |
| Atp6v0e2      | 60.63123096 | -2.892446324 | 0.431834943 | -6.698036761 | 2.11E-11       | 1.49E-10    |
| Fchsd1        | 162.7003311 | -2.8938555   | 0.329056915 | -8.794391996 | 1.44E-18       | 2.03E-17    |
| BC147527      | 16.95646603 | -2.894190327 | 0.974260228 | -2.97065429  | 0.002971661    | 0.006785545 |
| Evi2b         | 121.3247997 | -2.894317204 | 0.35554672  | -8.140469437 | 3.94E-16       | 4.49E-15    |
| Tnfaip8       | 193.5914212 | -2.895035837 | 0.315759359 | -9.168487819 | 4.80E-20       | 7.69E-19    |
| Npc1l1        | 2.450781475 | -2.895322084 | 1.828514448 | -1.583428606 | 0.113323807    | 0.171896456 |
| P2ry13        | 103.4900664 | -2.895384321 | 0.348593045 | -8.305915347 | 9.91E-17       | 1.19E-15    |
| Pcdhb10       | 2.467824017 | -2.896291235 | 1.541699003 | -1.878635992 | 0.060294213    | 0.099265644 |
| Cby3          | 1.188092924 | -2.896356532 | 2.014638274 | -1.437655866 | 0.150531721 NA |             |
| Ceacam12      | 1.225439157 | -2.897226264 | 1.815909288 | -1.595468607 | 0.110607485 NA |             |
| Olfir270      | 2.630570323 | -2.897656848 | 1.602050953 | -1.808717034 | 0.070494975    | 0.113806661 |
| Fam129b       | 810.2413809 | -2.897701327 | 0.262255963 | -11.04913419 | 2.21E-28       | 6.75E-27    |
| AC123856.1    | 2.486906986 | -2.897964279 | 1.58920488  | -1.823530946 | 0.068223014    | 0.110662793 |
| Gm4796        | 1.224633858 | -2.898374865 | 1.848279499 | -1.568147495 | 0.116846715 NA |             |
| Igkv19-93     | 7.113662525 | -2.89860474  | 1.129332954 | -2.56665205  | 0.010268559    | 0.02080561  |
| Ighv3-1       | 2.483394355 | -2.900601318 | 1.569242247 | -1.848408888 | 0.064543214    | 0.105325233 |
| Chst12        | 52.17869294 | -2.90110169  | 0.415528969 | -6.981707429 | 2.92E-12       | 2.26E-11    |
| Syne4         | 270.4532475 | -2.901148287 | 0.399483547 | -7.262247246 | 3.81E-13       | 3.24E-12    |
| Zfp462        | 92.5445812  | -2.901789562 | 0.439009481 | -6.60985625  | 3.85E-11       | 2.63E-10    |
| Rbp3          | 1.162748614 | -2.904821938 | 2.516567202 | -1.154279503 | 0.248385597 NA |             |
| Capn5         | 195.8001868 | -2.905296673 | 0.231623948 | -12.54316187 | 4.33E-36       | 2.39E-34    |
| Slamf7        | 68.57043283 | -2.905397418 | 0.370100492 | -7.850293305 | 4.15E-15       | 4.29E-14    |
| Ctca3a1       | 631.2342141 | -2.907811576 | 0.301026134 | -9.659664887 | 4.47E-22       | 8.39E-21    |
| Meox1         | 21.23286586 | -2.909858893 | 0.638393012 | -4.558099536 | 5.16E-06       | 1.90E-05    |
| Cd200         | 154.5903885 | -2.910110166 | 0.528186142 | -5.50962991  | 3.60E-08       | 1.74E-07    |
| Cd53          | 324.0934552 | -2.910521529 | 0.258776451 | -11.24724261 | 2.39E-29       | 7.86E-28    |
| Grap2         | 46.19488925 | -2.911109762 | 0.46603619  | -6.246531546 | 4.20E-10       | 2.55E-09    |
| Chn1          | 47.56430131 | -2.912514924 | 0.642174371 | -4.535395766 | 5.75E-06       | 2.10E-05    |
| Ighv5-9       | 2.583431899 | -2.914247772 | 1.631875951 | -1.785826778 | 0.07412731     | 0.11898337  |
| Osbpl10       | 13.23749963 | -2.917219889 | 0.82487364  | -3.536565779 | 0.000405366    | 0.001101302 |
| Ptgrf         | 40.22936582 | -2.918269844 | 0.656593352 | -4.44456197  | 8.81E-06       | 3.14E-05    |
| Cd164I2       | 2.685651791 | -2.919194027 | 1.728691862 | -1.688672279 | 0.091282251    | 0.14292614  |
| Ddah2         | 196.3566281 | -2.920067413 | 0.354327645 | -8.241150398 | 1.71E-16       | 2.00E-15    |
| Hrh1          | 3.861765317 | -2.922134318 | 1.281867034 | -2.279592376 | 0.022631876    | 0.041965218 |
| Rasl10b       | 46.18455885 | -2.922732876 | 0.784893951 | -3.723729648 | 0.000196301    | 0.000564722 |
| Ly9           | 63.07768399 | -2.923931826 | 0.493349878 | -5.926690077 | 3.09E-09       | 1.70E-08    |
| Gm1966        | 60.62601464 | -2.924902268 | 0.505806853 | -5.782646583 | 7.35E-09       | 3.87E-08    |
| Gm2619        | 2.561039017 | -2.925108005 | 1.484933737 | -1.969796991 | 0.048861642    | 0.082769601 |
| Lrrc8b        | 86.05109425 | -2.925881882 | 0.393867612 | -7.428592221 | 1.10E-13       | 9.87E-13    |
| Arhgap40      | 1.206740951 | -2.925989449 | 2.474329397 | -1.182538369 | 0.23699215 NA  |             |
| Slc37a2       | 96.38078671 | -2.926577651 | 0.316530299 | -9.245805722 | 2.33E-20       | 3.84E-19    |

|               |             |              |             |              |             |    |             |
|---------------|-------------|--------------|-------------|--------------|-------------|----|-------------|
| Armc12        | 1.220117074 | -2.927130134 | 2.0539304   | -1.42513599  | 0.154117895 | NA |             |
| BX890553.1    | 1.24013046  | -2.927132904 | 2.488420898 | -1.176301367 | 0.23947447  | NA |             |
| FO907130.1    | 1.220612877 | -2.927955512 | 2.42020944  | -1.20979427  | 0.226357846 | NA |             |
| Gfra4         | 3.762221996 | -2.928499052 | 1.488411452 | -1.967533271 | 0.049121764 |    | 0.083111139 |
| Cd200r4       | 11.99733028 | -2.928548932 | 0.888011854 | -3.297871442 | 0.000974207 |    | 0.002461946 |
| Dnah6         | 1.228469819 | -2.92866614  | 2.089044397 | -1.401916658 | 0.160940135 | NA |             |
| Mymk          | 1.254320501 | -2.929365007 | 1.916956304 | -1.528133428 | 0.126479413 | NA |             |
| Pkhd1         | 727.2644314 | -2.929504772 | 0.342031497 | -8.565014618 | 1.08E-17    |    | 1.42E-16    |
| Fbxw24        | 1.218764908 | -2.931190827 | 2.498587625 | -1.173139096 | 0.240740031 | NA |             |
| Asprv1        | 4.745664586 | -2.932666134 | 1.2717857   | -2.30594363  | 0.021113782 |    | 0.039437686 |
| Gask1b        | 52.95959835 | -2.932697217 | 0.702585497 | -4.174149953 | 2.99E-05    |    | 9.81E-05    |
| Fam205a4      | 1.22529051  | -2.932811492 | 2.419509045 | -1.212151489 | 0.225454397 | NA |             |
| Nlgn2         | 377.5493239 | -2.934486421 | 0.34750288  | -8.444495252 | 3.05E-17    |    | 3.86E-16    |
| Igkv4-79      | 1.197318512 | -2.935109201 | 2.946201381 | -0.996235091 | 0.319135933 | NA |             |
| Gm21182       | 1.245879491 | -2.935202407 | 2.404647937 | -1.220637068 | 0.222223465 | NA |             |
| Lta           | 2.545986195 | -2.935812582 | 1.677529214 | -1.750081344 | 0.080104278 |    | 0.127362484 |
| Gm7046        | 1.255118868 | -2.935882476 | 2.157064841 | -1.361054346 | 0.173496516 | NA |             |
| Tnfrsf21      | 227.832409  | -2.937297325 | 0.434566852 | -6.759138012 | 1.39E-11    |    | 1.00E-10    |
| Chaf1b        | 132.7162447 | -2.937581586 | 0.334521002 | -8.781456373 | 1.61E-18    |    | 2.27E-17    |
| Higd1c        | 1.253191516 | -2.939706639 | 2.532591366 | -1.160750478 | 0.245743387 | NA |             |
| Cdkn1c        | 200.9455329 | -2.940293855 | 0.455509612 | -6.454954582 | 1.08E-10    |    | 7.04E-10    |
| Cytip         | 69.68807705 | -2.940962739 | 0.4025059   | -7.306632613 | 2.74E-13    |    | 2.37E-12    |
| Adamts9       | 279.4966667 | -2.942997812 | 0.420503435 | -6.998748571 | 2.58E-12    |    | 2.01E-11    |
| Ctps          | 496.7599526 | -2.943003187 | 0.405887773 | -7.250780598 | 4.14E-13    |    | 3.52E-12    |
| C1qa          | 2052.035564 | -2.943262048 | 0.229486371 | -12.82543291 | 1.18E-37    |    | 7.35E-36    |
| Gm13039       | 1.263281598 | -2.944235772 | 2.156918093 | -1.365019739 | 0.172246846 | NA |             |
| Gm8113        | 326.3855839 | -2.944431838 | 0.261953857 | -11.24026906 | 2.59E-29    |    | 8.48E-28    |
| Arhgap30      | 267.4225762 | -2.945318073 | 0.259733076 | -11.33978823 | 8.33E-30    |    | 2.90E-28    |
| Pygo1         | 39.76801724 | -2.946299837 | 0.701064629 | -4.202608027 | 2.64E-05    |    | 8.72E-05    |
| Gm17853       | 1.247763105 | -2.946737168 | 2.99997152  | -0.982255048 | 0.325974214 | NA |             |
| Cacng8        | 2.578578649 | -2.947020202 | 1.857514313 | -1.5865397   | 0.112616934 |    | 0.171006429 |
| Trbc2         | 35.2106654  | -2.947566603 | 0.548338278 | -5.375451883 | 7.64E-08    |    | 3.56E-07    |
| Kntc1         | 47.18851204 | -2.948635446 | 0.837564451 | -3.520487816 | 0.000430754 |    | 0.001164524 |
| Gm28552       | 1.255188082 | -2.948694294 | 1.874532098 | -1.573029502 | 0.115711987 | NA |             |
| AB124611      | 123.4800715 | -2.948840607 | 0.436430982 | -6.756716929 | 1.41E-11    |    | 1.02E-10    |
| Slc16a5       | 216.4620195 | -2.951483367 | 0.328839397 | -8.975455475 | 2.82E-19    |    | 4.23E-18    |
| Lrrc75a       | 58.32809879 | -2.951561978 | 0.440928874 | -6.693963932 | 2.17E-11    |    | 1.53E-10    |
| Cavin1        | 698.3517023 | -2.951909646 | 0.257628042 | -11.45802929 | 2.14E-30    |    | 7.79E-29    |
| Rassf9        | 58.12896081 | -2.951976396 | 0.491753752 | -6.002956527 | 1.94E-09    |    | 1.09E-08    |
| Thbs2         | 137.983511  | -2.953310736 | 0.440972544 | -6.697266706 | 2.12E-11    |    | 1.50E-10    |
| Cst7          | 4.688471414 | -2.95536057  | 1.242241814 | -2.379054171 | 0.017357125 |    | 0.033139687 |
| Nipal1        | 112.6594768 | -2.956330668 | 0.575155591 | -5.140053773 | 2.75E-07    |    | 1.19E-06    |
| Cavin3        | 107.192529  | -2.957289502 | 0.393398633 | -7.517284637 | 5.59E-14    |    | 5.18E-13    |
| Brsk1         | 40.49187682 | -2.95844801  | 0.707993937 | -4.17863467  | 2.93E-05    |    | 9.63E-05    |
| Fstl1         | 500.6246168 | -2.958988917 | 0.211181284 | -14.01160587 | 1.32E-44    |    | 1.37E-42    |
| Sema4d        | 157.5610064 | -2.960137525 | 0.353115781 | -8.382909194 | 5.16E-17    |    | 6.38E-16    |
| Rbp1          | 1425.783076 | -2.960878074 | 0.289506418 | -10.22733139 | 1.50E-24    |    | 3.39E-23    |
| 9130213A22Rik | 2.645778421 | -2.961929388 | 1.504969809 | -1.968098875 | 0.049056662 |    | 0.083033953 |
| Stxbp1        | 142.7330006 | -2.962210238 | 0.292867824 | -10.11449532 | 4.76E-24    |    | 1.04E-22    |
| Trem12        | 18.84048557 | -2.962258208 | 0.626726367 | -4.726557498 | 2.28E-06    |    | 8.75E-06    |
| Scimp         | 31.52577363 | -2.962390796 | 0.5162819   | -5.737932698 | 9.58E-09    |    | 4.98E-08    |
| Plekha4       | 126.6742349 | -2.962406488 | 0.536654431 | -5.520137945 | 3.39E-08    |    | 1.64E-07    |
| Ly6c2         | 72.7718784  | -2.963049562 | 0.440821933 | -6.721647313 | 1.80E-11    |    | 1.27E-10    |
| Fgd2          | 250.6646496 | -2.963424205 | 0.298676259 | -9.921860594 | 3.34E-23    |    | 6.82E-22    |
| Atcay         | 1.268464107 | -2.963464774 | 2.161525692 | -1.371006037 | 0.170373074 | NA |             |
| Agpr          | 1.264086417 | -2.963872079 | 1.825707278 | -1.623410344 | 0.104501715 | NA |             |
| Pdlim4        | 57.2962784  | -2.965250374 | 0.472622954 | -6.274029545 | 3.52E-10    |    | 2.15E-09    |
| Olfr714       | 1.234264662 | -2.966315717 | 2.116396661 | -1.401587789 | 0.161038375 | NA |             |
| Igkv4-55      | 4.526117664 | -2.967376283 | 1.633221722 | -1.816885144 | 0.069234702 |    | 0.112087066 |
| Fgl2          | 179.1349612 | -2.9688434   | 0.318090528 | -9.333328527 | 1.03E-20    |    | 1.74E-19    |
| Pde6b         | 1.23448986  | -2.96986239  | 2.376728058 | -1.249559191 | 0.211460618 | NA |             |
| Gm11765       | 1.274875601 | -2.970549824 | 2.011173576 | -1.477023097 | 0.139669446 | NA |             |
| Nlrp3         | 45.69774147 | -2.971168575 | 0.53316571  | -5.572692544 | 2.51E-08    |    | 1.24E-07    |
| Sash3         | 90.78976545 | -2.971784992 | 0.378551031 | -7.850421075 | 4.15E-15    |    | 4.29E-14    |
| Crb2          | 38.43885346 | -2.97352613  | 0.986524878 | -3.014142062 | NA          | NA |             |
| Arc           | 5.096829356 | -2.977208646 | 1.362111999 | -2.185729696 | 0.028835387 |    | 0.051959167 |



|           |             |              |             |              |             |    |             |
|-----------|-------------|--------------|-------------|--------------|-------------|----|-------------|
| Syce3     | 1.283780743 | -2.979129595 | 2.027515096 | -1.469350142 | 0.141737843 | NA |             |
| Snai3     | 17.85903112 | -2.979136114 | 0.943686151 | -3.156914097 | 0.001594483 |    | 0.003854615 |
| Col4a1    | 2783.79031  | -2.980736759 | 0.20521261  | -14.52511499 | 8.40E-48    |    | 1.08E-45    |
| Il3ra     | 194.6775211 | -2.981650708 | 0.438008584 | -6.807288297 | 9.95E-12    |    | 7.31E-11    |
| Ccnd2     | 439.2564501 | -2.98188724  | 0.373991659 | -7.973138353 | 1.55E-15    |    | 1.67E-14    |
| Trim47    | 467.3352418 | -2.982697675 | 0.243710242 | -12.23870467 | 1.93E-34    |    | 9.49E-33    |
| Chrdl2    | 9.738373004 | -2.982911306 | 1.321971429 | -2.256411326 | 0.024044883 |    | 0.044279353 |
| C1qc      | 1993.854878 | -2.990590735 | 0.248320283 | -12.04328014 | 2.10E-33    |    | 9.46E-32    |
| Riiad1    | 1.262725638 | -2.991449842 | 2.041564954 | -1.46527292  | 0.142846472 | NA |             |
| Ighv1-63  | 1.255914038 | -2.992283944 | 2.897936418 | -1.032556796 | 0.301811355 | NA |             |
| Sbk3      | 1.334764138 | -2.994364117 | 2.079750201 | -1.439771044 | 0.149932186 | NA |             |
| Cdhr2     | 22.5080978  | -2.995393001 | 0.875095468 | -3.422932824 | 0.000619494 |    | 0.001627293 |
| Inha      | 49.99401304 | -2.995523429 | 0.707701294 | -4.232751097 | 2.31E-05    |    | 7.71E-05    |
| Slc2a4    | 7.868923797 | -2.995936627 | 1.099742949 | -2.724215353 | 0.006445446 |    | 0.013670312 |
| Plek2     | 51.20393518 | -2.996737823 | 0.425704896 | -7.039472306 | 1.93E-12    |    | 1.53E-11    |
| Sh3bp1    | 216.015657  | -2.997141933 | 0.32115053  | -9.332514364 | 1.03E-20    |    | 1.75E-19    |
| Loxl2     | 318.6923928 | -2.997188775 | 0.278475873 | -10.76283104 | 5.16E-27    |    | 1.42E-25    |
| Mmp10     | 1.286681334 | -2.99752362  | 1.993439724 | -1.503694135 | 0.13266014  | NA |             |
| Ccdc102a  | 64.98510812 | -2.997952562 | 0.38877888  | -7.711202214 | 1.25E-14    |    | 1.23E-13    |
| Pnp1a3    | 27.53742476 | -2.998892667 | 0.803224368 | -3.733567839 | 0.000188786 |    | 0.00054485  |
| D6Ert527e | 1.258980947 | -2.999043364 | 2.042751146 | -1.468139361 | 0.142066372 | NA |             |
| Cdh26     | 1.245003378 | -3.003564473 | 2.461488529 | -1.220222819 | 0.222380419 | NA |             |
| Atp8b2    | 198.7278418 | -3.003903775 | 0.337427718 | -8.902362247 | 5.47E-19    |    | 8.01E-18    |
| Gm16363   | 1.300920231 | -3.004133063 | 3.065680923 | -0.979923592 | 0.327123836 | NA |             |
| Trpc1     | 31.54853883 | -3.004234148 | 0.542665737 | -5.536067493 | 3.09E-08    |    | 1.51E-07    |
| Tnfrsf8   | 1.300908044 | -3.005907402 | 1.775560047 | -1.692934805 | 0.090467878 | NA |             |
| Ydjc      | 30.20692905 | -3.006013182 | 0.581225891 | -5.171850101 | 2.32E-07    |    | 1.02E-06    |
| Fmn13     | 260.5482979 | -3.006474138 | 0.280892969 | -10.70327302 | 9.82E-27    |    | 2.64E-25    |
| Nbl1      | 59.47514908 | -3.007072981 | 0.716479235 | -4.197013445 | 2.70E-05    |    | 8.93E-05    |
| Zfp13     | 60.55332608 | -3.010168017 | 0.497827038 | -6.046614161 | 1.48E-09    |    | 8.42E-09    |
| Pcdh17    | 73.61039841 | -3.010962397 | 0.528901487 | -5.692860519 | 1.25E-08    |    | 6.40E-08    |
| Lekr1     | 10.49597634 | -3.011069674 | 0.848401073 | -3.549111109 | 0.000386534 |    | 0.001053835 |
| Alox5     | 11.0268436  | -3.011463365 | 0.936890348 | -3.214317845 | 0.001307548 |    | 0.003226384 |
| Trpv2     | 71.80809754 | -3.011846151 | 0.351598962 | -8.566140631 | 1.07E-17    |    | 1.40E-16    |
| Gtse1     | 99.35158768 | -3.012350533 | 0.445247525 | -6.765563787 | 1.33E-11    |    | 9.59E-11    |
| Fhl4      | 1.293046093 | -3.012360413 | 1.779030329 | -1.693259729 | 0.09040604  | NA |             |
| Plp2      | 290.4681231 | -3.012444855 | 0.19647895  | -15.33215064 | 4.66E-53    |    | 7.72E-51    |
| Mthfd1l   | 91.93227456 | -3.014932525 | 0.4961711   | -6.076396879 | 1.23E-09    |    | 7.08E-09    |
| Tmsb4x    | 5479.101574 | -3.015870442 | 0.32341189  | -9.325168713 | 1.11E-20    |    | 1.87E-19    |
| Sor1      | 222.5920465 | -3.015984337 | 0.266522926 | -11.31604092 | 1.09E-29    |    | 3.74E-28    |
| BC022960  | 5.075568143 | -3.018131253 | 1.196436413 | -2.522600633 | 0.011649061 |    | 0.023279006 |
| Mcm5      | 264.6636867 | -3.018685701 | 0.579586857 | -5.208340504 | 1.91E-07    |    | 8.51E-07    |
| Qrfp      | 1.258041991 | -3.019234797 | 2.120984465 | -1.423506323 | 0.154589431 | NA |             |
| Gm12112   | 2.710396923 | -3.020142863 | 2.395738919 | -1.260631048 | 0.207441807 |    | 0.28607571  |
| Col6a3    | 666.1330261 | -3.02018554  | 0.349772663 | -8.634710076 | 5.89E-18    |    | 7.92E-17    |
| Serpine1  | 360.888236  | -3.021148029 | 0.534321506 | -5.654176365 | 1.57E-08    |    | 7.92E-08    |
| Slc7a3    | 9.231292699 | -3.021363724 | 0.960546652 | -3.145462761 | 0.001658243 |    | 0.003993463 |
| Cited1    | 3.045670678 | -3.021672016 | 1.788910971 | -1.689112574 | 0.091197859 |    | 0.142807118 |
| Depdc1b   | 10.93295087 | -3.022564847 | 1.096673214 | -2.756121703 | 0.005849123 |    | 0.012536566 |
| Eme1      | 17.85138431 | -3.024102256 | 0.84767103  | -3.5675423   | 0.000360345 |    | 0.000988124 |
| Itgb8     | 101.2153259 | -3.027328157 | 0.580370984 | -5.216194883 | 1.83E-07    |    | 8.17E-07    |
| Atf7ip2   | 1.401780394 | -3.027380918 | 2.115018164 | -1.431373484 | 0.152323204 | NA |             |
| Dsn1      | 85.29970993 | -3.027642893 | 0.319471624 | -9.477032265 | 2.62E-21    |    | 4.66E-20    |
| Elfn2     | 12.96019944 | -3.02820051  | 1.323551038 | -2.287936334 | 0.022141229 |    | 0.041176358 |
| Stil      | 50.92829203 | -3.029230601 | 0.70114598  | -4.320399297 | 1.56E-05    |    | 5.34E-05    |
| Crc1      | 1.306865554 | -3.030742183 | 2.100910708 | -1.442584957 | 0.149137424 | NA |             |
| Usp29     | 134.4903242 | -3.03210452  | 0.363686128 | -8.337146478 | 7.61E-17    |    | 9.24E-16    |
| Rps10-ps1 | 1.332851159 | -3.033359049 | 2.194182804 | -1.382455027 | 0.16683203  | NA |             |
| Klhl10    | 1.323906411 | -3.033536795 | 2.051529236 | -1.478671004 | 0.139228266 | NA |             |
| Eya2      | 3.583168074 | -3.034704286 | 1.623455547 | -1.869286961 | 0.061582901 |    | 0.101104131 |
| Mup-ps24  | 1.339303286 | -3.03510008  | 2.427687059 | -1.250202356 | 0.211225637 | NA |             |
| Csf3r     | 168.3658467 | -3.035777462 | 0.264365928 | -11.48324023 | 1.60E-30    |    | 5.88E-29    |
| Sytl3     | 7.319065801 | -3.03677072  | 1.037976508 | -2.925664211 | 0.003437217 |    | 0.007739754 |
| Tspan3    | 385.6571602 | -3.037811485 | 0.272681085 | -11.14052883 | 7.96E-29    |    | 2.51E-27    |
| Spns3     | 23.05837223 | -3.038926361 | 0.55320544  | -5.493305273 | 3.94E-08    |    | 1.90E-07    |
| Fgf13     | 8.096142065 | -3.039557041 | 1.11294619  | -2.731090746 | 0.006312509 |    | 0.013415065 |

|            |             |              |             |              |                |             |
|------------|-------------|--------------|-------------|--------------|----------------|-------------|
| Ppp1r3d    | 12.79835739 | -3.040317342 | 0.870404622 | -3.492993105 | 0.000477639    | 0.001281118 |
| Pcdhgb6    | 26.41149518 | -3.040514368 | 0.679568774 | -4.474181987 | 7.67E-06       | 2.75E-05    |
| Igkv6-25   | 4.801911882 | -3.042909025 | 1.422361312 | -2.139336187 | 0.032408451    | 0.057648088 |
| Fcgr4      | 181.9113144 | -3.044020307 | 0.40282637  | -7.556656003 | 4.14E-14       | 3.89E-13    |
| Tctex1d4   | 1.305708186 | -3.044749704 | 2.031030976 | -1.499115346 | 0.133843711 NA |             |
| Gm8822     | 1.346566918 | -3.045065021 | 1.827114354 | -1.666597941 | 0.095594379 NA |             |
| AF366264   | 1.311562334 | -3.046379749 | 2.042292717 | -1.491646973 | 0.135791717 NA |             |
| Tabg2      | 17.16239462 | -3.046534891 | 0.732650063 | -4.158240125 | 3.21E-05       | 0.00010472  |
| Gpr137b-ps | 59.94999598 | -3.04706963  | 0.423854748 | -7.188947724 | 6.53E-13       | 5.46E-12    |
| Gja5       | 70.60949634 | -3.047516185 | 0.585050346 | -5.208981082 | 1.90E-07       | 8.48E-07    |
| Gm7424     | 1.32569305  | -3.047590676 | 1.994376676 | -1.528091815 | 0.126489743 NA |             |
| Serpinh1   | 984.5240949 | -3.049394478 | 0.350976962 | -8.688303825 | 3.68E-18       | 5.02E-17    |
| Uts2b      | 1.316552919 | -3.050036613 | 2.042032269 | -1.493628019 | 0.135272872 NA |             |
| Skint3     | 2.849079344 | -3.051729084 | 1.774062798 | -1.720192255 | 0.0853975      | 0.134814019 |
| Arhgap19   | 243.266498  | -3.052637738 | 0.243492692 | -12.53687624 | 4.69E-36       | 2.58E-34    |
| Nrarp      | 106.9379372 | -3.053234048 | 0.352458345 | -8.662680546 | 4.61E-18       | 6.25E-17    |
| Gm14523    | 2.768188569 | -3.053414599 | 1.52735084  | -1.999157311 | 0.045591336    | 0.077911096 |
| Abcc12     | 24.50823881 | -3.054105448 | 0.814908184 | -3.747790864 | 0.000178399    | 0.00051662  |
| Gm7808     | 1.317007159 | -3.055741559 | 1.818700469 | -1.680178574 | 0.092922577 NA |             |
| Klf6       | 924.0289901 | -3.055908392 | 0.288743931 | -10.58345495 | 3.56E-26       | 9.09E-25    |
| Dusp8      | 91.08852677 | -3.05648713  | 0.485959082 | -6.289597708 | 3.18E-10       | 1.96E-09    |
| Apbb1ip    | 140.2735657 | -3.057685409 | 0.400068501 | -7.642904647 | 2.12E-14       | 2.05E-13    |
| Calb1      | 1.610380698 | -3.057692    | 2.056368513 | -1.486937765 | 0.137031249 NA |             |
| Cds1       | 30.78337121 | -3.057694662 | 0.580511382 | -5.267243255 | 1.38E-07       | 6.25E-07    |
| Esco2      | 62.65437519 | -3.059702863 | 0.642207907 | -4.764349411 | 1.89E-06       | 7.35E-06    |
| Dok2       | 156.1604548 | -3.060388375 | 0.406413991 | -7.530223963 | 5.07E-14       | 4.73E-13    |
| Zc3hav11   | 100.4375119 | -3.062742004 | 0.321072338 | -9.539102707 | 1.44E-21       | 2.61E-20    |
| Kcnq1      | 76.99917302 | -3.064344024 | 0.578672569 | -5.295471375 | 1.19E-07       | 5.40E-07    |
| Scx        | 8.201906647 | -3.064418174 | 1.075470046 | -2.849375661 | 0.004380512    | 0.009648446 |
| Nanos3     | 1.408456732 | -3.064782741 | 1.811375905 | -1.691963955 | 0.090652846 NA |             |
| Thsd4      | 133.6798423 | -3.065616339 | 0.422649314 | -7.253333292 | 4.07E-13       | 3.46E-12    |
| Cd68       | 405.8386831 | -3.067420011 | 0.270591004 | -11.33600142 | 8.70E-30       | 3.02E-28    |
| Tceal9     | 1461.966364 | -3.067605865 | 0.395868131 | -7.749059924 | 9.26E-15       | 9.25E-14    |
| Ctxn1      | 96.27740334 | -3.068430432 | 0.454206983 | -6.755577403 | 1.42E-11       | 1.02E-10    |
| Adrb2      | 100.5273763 | -3.068829483 | 0.481560097 | -6.372682252 | 1.86E-10       | 1.18E-09    |
| Olfir1198  | 1.354965534 | -3.070230538 | 1.771193759 | -1.733424433 | 0.083020258 NA |             |
| Dipk2b     | 2.672326421 | -3.070548679 | 1.745866984 | -1.758752933 | 0.078619482    | 0.125367593 |
| Fanca      | 81.18873341 | -3.071098263 | 0.531240322 | -5.780996163 | 7.43E-09       | 3.90E-08    |
| Gm5150     | 26.81378672 | -3.072392212 | 0.81951151  | -3.749053156 | 0.000177503    | 0.000514552 |
| Arhgef39   | 49.02000235 | -3.073000996 | 0.491173405 | -6.256448268 | 3.94E-10       | 2.40E-09    |
| Krt4       | 30.3355089  | -3.073303382 | 0.951087275 | -3.231357903 | 0.001232036    | 0.00305509  |
| Igkv4-57-1 | 4.984000969 | -3.074596505 | 1.379864228 | -2.228187703 | 0.025868001    | 0.047205917 |
| Rbp2       | 12.07150112 | -3.075193908 | 1.356038019 | -2.267778532 | 0.023342708    | 0.04317059  |
| Cpa2       | 1.403120179 | -3.077767537 | 2.125567816 | -1.447974285 | 0.147624243 NA |             |
| Tlr2       | 124.4874191 | -3.078033162 | 0.294924761 | -10.43667255 | 1.69E-25       | 4.11E-24    |
| Cenpe      | 96.01716082 | -3.079038837 | 1.02832125  | -2.994238267 | 0.00275131     | 0.006318784 |
| Cand2      | 70.76569825 | -3.079301063 | 0.429827124 | -7.164045483 | 7.83E-13       | 6.48E-12    |
| Miox       | 19.53140125 | -3.079556603 | 0.896617443 | -3.434638293 | 0.000593345    | 0.001564149 |
| Cga        | 1.372434224 | -3.080573483 | 1.725534199 | -1.785286832 | 0.074214804 NA |             |
| Eno4       | 2.749607738 | -3.080615237 | 1.528482362 | -2.0154732   | 0.043855091    | 0.075260882 |
| Ctla4      | 4.031443174 | -3.082150854 | 1.434427489 | -2.148697566 | 0.031658382    | 0.056508438 |
| Bmp4       | 319.5920225 | -3.082699495 | 0.352609408 | -8.742533308 | 2.28E-18       | 3.18E-17    |
| Rab7b      | 89.30872884 | -3.082732373 | 0.519396427 | -5.935220598 | 2.93E-09       | 1.62E-08    |
| Gm4883     | 1.374791205 | -3.083847365 | 2.007532344 | -1.536138321 | 0.124504459 NA |             |
| Gm6012     | 1.38493234  | -3.083861146 | 1.755480844 | -1.756704527 | 0.078968186 NA |             |
| Nfkbie     | 295.1558505 | -3.084438725 | 0.246172506 | -12.5295825  | 5.14E-36       | 2.81E-34    |
| Cercam     | 40.34140778 | -3.085282352 | 0.630444525 | -4.893820519 | 9.89E-07       | 3.99E-06    |
| Tnni2      | 3.758764101 | -3.085435928 | 1.381296504 | -2.233724562 | 0.025501202    | 0.046601403 |
| Slco3a1    | 427.0891698 | -3.085804114 | 0.315166949 | -9.791014332 | 1.23E-22       | 2.42E-21    |
| Cmtm7      | 184.8240851 | -3.086103404 | 0.313978617 | -9.829024123 | 8.44E-23       | 1.67E-21    |
| Igkv12-89  | 1.342056174 | -3.087892614 | 2.324843057 | -1.328215513 | 0.184106921 NA |             |
| Dipk1b     | 29.43719501 | -3.088828141 | 0.554251254 | -5.572974565 | 2.50E-08       | 1.24E-07    |
| Gm13420    | 7.799911544 | -3.089349591 | 1.04380339  | -2.959704501 | 0.003079343    | 0.007009832 |
| Nrg2       | 6.170674744 | -3.089469849 | 1.207141666 | -2.559326661 | 0.010487514    | 0.021176258 |
| Kcne3      | 152.6552775 | -3.090087229 | 0.441295274 | -7.002312076 | 2.52E-12       | 1.97E-11    |
| Gsn        | 2126.604179 | -3.09009941  | 0.688454071 | -4.488461237 | 7.17E-06       | 2.59E-05    |

|               |             |              |             |              |                |             |
|---------------|-------------|--------------|-------------|--------------|----------------|-------------|
| Ano6          | 587.9791145 | -3.091022972 | 0.22029175  | -14.03149672 | 1.00E-44       | 1.05E-42    |
| Fut10         | 36.62745224 | -3.091917063 | 0.576940369 | -5.359162279 | 8.36E-08       | 3.88E-07    |
| Gm7476        | 1.388140926 | -3.092133284 | 2.453059537 | -1.260521091 | 0.207481445 NA |             |
| Dpep3         | 1.368052804 | -3.092147001 | 2.003691121 | -1.543225384 | 0.1227761 NA   |             |
| Itgad         | 1.399998695 | -3.09484596  | 2.058614342 | -1.503363645 | 0.132745296 NA |             |
| Klrg1         | 1.373058613 | -3.095013801 | 2.340873574 | -1.322161878 | 0.186114252 NA |             |
| Gprin2        | 11.61300786 | -3.095639953 | 0.872159998 | -3.54939456  | 0.000386118    | 0.001053161 |
| Tspan13       | 68.45733321 | -3.095897403 | 0.430261851 | -7.195379739 | 6.23E-13       | 5.22E-12    |
| Atp1a3        | 40.09007986 | -3.099899048 | 0.476637096 | -6.503688184 | 7.84E-11       | 5.20E-10    |
| Gm4247        | 1.408144664 | -3.100923513 | 1.742785977 | -1.779291063 | 0.075192055 NA |             |
| Ptger1        | 4.619535499 | -3.103685242 | 1.272357632 | -2.439318289 | 0.014715001    | 0.028610484 |
| lkzf1         | 125.717641  | -3.104741604 | 0.317290011 | -9.785185459 | 1.30E-22       | 2.55E-21    |
| 5430427019Rik | 18.88661803 | -3.105225866 | 0.735937874 | -4.219413045 | 2.45E-05       | 8.15E-05    |
| Irak3         | 68.02054598 | -3.106437072 | 0.586212798 | -5.299162833 | 1.16E-07       | 5.30E-07    |
| Ccnd1         | 1411.11649  | -3.106632474 | 0.438139356 | -7.090512257 | 1.34E-12       | 1.08E-11    |
| Igkv4-80      | 1.342722648 | -3.106845063 | 2.078426131 | -1.494806583 | 0.134964928 NA |             |
| Pbp2          | 1.3699144   | -3.106912008 | 2.324360825 | -1.33667371  | 0.181329167 NA |             |
| Cers5         | 224.0567892 | -3.106962294 | 0.297877661 | -10.43032995 | 1.80E-25       | 4.39E-24    |
| Dnajb13       | 3.672503755 | -3.10704339  | 1.333562834 | -2.32988151  | 0.019812415    | 0.037264127 |
| Flrt1         | 19.05354452 | -3.107183004 | 0.722851803 | -4.298506265 | 1.72E-05       | 5.85E-05    |
| Slc10a6       | 28.41363888 | -3.10779251  | 0.894607855 | -3.473915964 | 0.000512922    | 0.001367363 |
| Gm3636        | 1.290622899 | -3.107957231 | 2.43524709  | -1.276238967 | 0.201871058 NA |             |
| Aebp1         | 168.8459154 | -3.109996845 | 0.373976398 | -8.316024393 | 9.10E-17       | 1.09E-15    |
| Gm4969        | 1.412080137 | -3.110176015 | 1.876258934 | -1.657647545 | 0.097388627 NA |             |
| Aurkb         | 89.59185896 | -3.110993655 | 0.600562725 | -5.180131109 | 2.22E-07       | 9.77E-07    |
| Robo2         | 62.47910383 | -3.112799234 | 0.559974281 | -5.55882536  | 2.72E-08       | 1.34E-07    |
| Gm4149        | 1.379935627 | -3.113348226 | 2.352538132 | -1.323399686 | 0.185702496 NA |             |
| Ittrip        | 93.83164962 | -3.114053496 | 0.447278419 | -6.962226136 | 3.35E-12       | 2.58E-11    |
| Sifn4         | 34.01575442 | -3.114852884 | 0.651636685 | -4.780045315 | 1.75E-06       | 6.84E-06    |
| Snph          | 1.425416173 | -3.115910449 | 2.118552033 | -1.470773623 | 0.141352348 NA |             |
| Ska2          | 118.4160096 | -3.116427562 | 0.329749666 | -9.450889203 | 3.36E-21       | 5.92E-20    |
| Rgs19         | 103.7289445 | -3.116705412 | 0.354053071 | -8.802932862 | 1.33E-18       | 1.89E-17    |
| Arhgap33      | 73.21700225 | -3.117565222 | 0.514611733 | -6.058091996 | 1.38E-09       | 7.89E-09    |
| Ier5          | 456.5859117 | -3.117598344 | 0.262495408 | -11.87677288 | 1.56E-32       | 6.69E-31    |
| Ttl6          | 1.384246534 | -3.118876922 | 1.7893784   | -1.742994619 | 0.081334555 NA |             |
| Mem229b       | 89.96452233 | -3.119415999 | 0.382670278 | -8.151707045 | 3.59E-16       | 4.10E-15    |
| Ccsap         | 12.75422703 | -3.122679005 | 0.903061345 | -3.457881373 | 0.000544441    | 0.001445512 |
| Ccdc88b       | 158.9131652 | -3.123155454 | 0.361684716 | -8.635021927 | 5.87E-18       | 7.91E-17    |
| Crybb1        | 1.372760997 | -3.124179273 | 1.97107885  | -1.585009789 | 0.11296411 NA  |             |
| Cbarp         | 146.8058992 | -3.124307347 | 0.450811885 | -6.930401466 | 4.20E-12       | 3.21E-11    |
| Hsf2bp        | 40.93529878 | -3.124431658 | 0.594446908 | -5.256031476 | 1.47E-07       | 6.63E-07    |
| Rab19         | 13.21975952 | -3.127312221 | 0.774886245 | -4.035833958 | 5.44E-05       | 0.000171263 |
| Lrrc75b       | 39.57268101 | -3.127655916 | 0.617927289 | -5.061527421 | 4.16E-07       | 1.76E-06    |
| Nbdy          | 85.19161712 | -3.127882773 | 0.40889191  | -7.649656792 | 2.02E-14       | 1.95E-13    |
| Mctp1         | 9.468733024 | -3.127980444 | 0.924362    | -3.383934478 | 0.000714551    | 0.001851597 |
| Igkv3-10      | 1.371749365 | -3.129314002 | 2.367701057 | -1.321667697 | 0.18627883 NA  |             |
| Mdk           | 89.55382127 | -3.131471059 | 0.433076261 | -7.230761285 | 4.80E-13       | 4.06E-12    |
| Inpp5d        | 322.3867985 | -3.134040473 | 0.261566121 | -11.98182876 | 4.42E-33       | 1.94E-31    |
| Sema3g        | 47.28552256 | -3.136740067 | 0.468749073 | -6.691725378 | 2.21E-11       | 1.55E-10    |
| Dusp2         | 27.64896652 | -3.138221973 | 0.580266734 | -5.408240362 | 6.36E-08       | 2.99E-07    |
| Cmklr1        | 154.4318316 | -3.138353252 | 0.393774556 | -7.969923924 | 1.59E-15       | 1.71E-14    |
| Ppp1r18       | 346.013736  | -3.13840171  | 0.287157858 | -10.92918622 | 8.36E-28       | 2.45E-26    |
| Rasgrp4       | 36.91210299 | -3.138532562 | 0.504346388 | -6.222970236 | 4.88E-10       | 2.94E-09    |
| Vdac3-ps1     | 1.395452975 | -3.139952709 | 1.957517967 | -1.604047964 | 0.108703481 NA |             |
| Them6         | 313.1164225 | -3.140616604 | 0.310014564 | -10.13054535 | 4.04E-24       | 8.88E-23    |
| Prss35        | 10.12724441 | -3.140745695 | 1.010104227 | -3.109328335 | 0.001875132    | 0.004459095 |
| Nacad         | 3.890099096 | -3.14209291  | 1.22645249  | -2.5619361   | 0.010409047    | 0.021047732 |
| Col6a6        | 51.97282545 | -3.143338823 | 0.567706322 | -5.536910021 | 3.08E-08       | 1.50E-07    |
| Tmem273       | 42.53341886 | -3.144944647 | 0.453054707 | -6.941644343 | 3.88E-12       | 2.97E-11    |
| Ncoa7         | 139.7224574 | -3.145927813 | 0.346540597 | -9.078093123 | 1.10E-19       | 1.71E-18    |
| Pou2f2        | 115.1667538 | -3.146385616 | 0.351481298 | -8.951786732 | 3.50E-19       | 5.22E-18    |
| Ect2          | 145.0961661 | -3.147237644 | 0.525486148 | -5.989192397 | 2.11E-09       | 1.18E-08    |
| Ptgis         | 89.790769   | -3.147778489 | 0.456619688 | -6.893654766 | 5.44E-12       | 4.10E-11    |
| Eln           | 345.2647477 | -3.147808413 | 0.278723868 | -11.29364496 | 1.41E-29       | 4.80E-28    |
| Rtn1          | 84.02483926 | -3.147849662 | 0.500135466 | -6.293994082 | 3.09E-10       | 1.91E-09    |
| Shcbp1l       | 2.752666744 | -3.147966639 | 1.571067909 | -2.003711375 | 0.045100987    | 0.077150474 |

|            |              |              |             |              |                |             |
|------------|--------------|--------------|-------------|--------------|----------------|-------------|
| Nnat       | 4.005820023  | -3.148204523 | 1.415749843 | -2.223701128 | 0.026168559    | 0.047698236 |
| Cox6a2     | 1.431355859  | -3.150318555 | 1.977177234 | -1.593341507 | 0.1110836 NA   |             |
| Slc39a5    | 71.87845363  | -3.151659725 | 0.76823852  | -4.102449491 | 4.09E-05       | 0.000131346 |
| Clec2l     | 1.439198024  | -3.152694388 | 2.475020535 | -1.273805346 | 0.2027321 NA   |             |
| Aif1l      | 57.38178958  | -3.154153683 | 0.650380422 | -4.84970577  | 1.24E-06       | 4.92E-06    |
| Hvcn1      | 87.19172078  | -3.154623369 | 0.466761502 | -6.758533761 | 1.39E-11       | 1.00E-10    |
| Bcl11b     | 13.74876617  | -3.15475101  | 0.899064639 | -3.508925691 | 0.000449921    | 0.001211538 |
| Gm266      | 1.39983901   | -3.156159339 | 1.809067775 | -1.744633    | 0.081048773 NA |             |
| Rpsa-ps4   | 1.459295391  | -3.156390215 | 2.118350008 | -1.490022991 | 0.136218191 NA |             |
| Igkj4      | 1.451565682  | -3.157069862 | 2.013292315 | -1.568113005 | 0.116854762 NA |             |
| Gm20537    | 1.422029451  | -3.158065131 | 1.925703142 | -1.639954292 | 0.101014671 NA |             |
| Me2        | 128.2663212  | -3.158120026 | 0.325264425 | -9.709392672 | 2.75E-22       | 5.23E-21    |
| Ankrd29    | 43.85695722  | -3.158646075 | 0.6401688   | -4.93408313  | 8.05E-07       | 3.30E-06    |
| C1qtnf5    | 174.47301778 | -3.158885684 | 0.256875398 | -12.29734616 | 9.36E-35       | 4.71E-33    |
| Kcnj1      | 2.688923008  | -3.159016942 | 1.900585973 | -1.662127884 | 0.096487136    | 0.149768978 |
| Spire1     | 36.80834176  | -3.159658989 | 0.588816219 | -5.366120846 | 8.04E-08       | 3.74E-07    |
| Sfxn3      | 213.2955222  | -3.160071715 | 0.29758825  | -10.61893979 | 2.43E-26       | 6.31E-25    |
| Plekha2    | 331.8409232  | -3.160162414 | 0.25361901  | -12.46027424 | 1.23E-35       | 6.51E-34    |
| Cdca2      | 70.94790596  | -3.16046998  | 0.505247948 | -6.255285142 | 3.97E-10       | 2.41E-09    |
| Rpl17-ps9  | 1.399147407  | -3.161728813 | 1.96543895  | -1.608662947 | 0.107690062 NA |             |
| Tspyl3     | 16.22044492  | -3.162026437 | 0.742507957 | -4.25857583  | 2.06E-05       | 6.92E-05    |
| S100a9     | 90.57278574  | -3.163637512 | 0.510597403 | -6.195952997 | 5.79E-10       | 3.46E-09    |
| Hck        | 244.1268594  | -3.165184782 | 0.368653274 | -8.585804079 | 9.02E-18       | 1.19E-16    |
| Hacd4      | 98.0204534   | -3.165891857 | 0.361869835 | -8.748703397 | 2.16E-18       | 3.01E-17    |
| Matk       | 28.77296973  | -3.166516322 | 0.573312784 | -5.52319155  | 3.33E-08       | 1.62E-07    |
| Cxcl14     | 182.6042417  | -3.166866256 | 0.433136101 | -7.311480725 | 2.64E-13       | 2.29E-12    |
| Asf1b      | 46.16591857  | -3.167586856 | 0.634917507 | -4.988973872 | 6.07E-07       | 2.52E-06    |
| Rragb      | 12.89752299  | -3.16917493  | 1.025391682 | -3.090696938 | 0.001996873    | 0.004720285 |
| Klhl35     | 1.458302832  | -3.169336666 | 2.056722013 | -1.540965015 | 0.123325301 NA |             |
| Il1rn      | 127.0551934  | -3.170645785 | 0.524953561 | -6.039859563 | 1.54E-09       | 8.77E-09    |
| Klhl31     | 9.946961946  | -3.171741815 | 1.512287825 | -2.097313595 | 0.035965824    | 0.063126261 |
| Zfp599     | 24.33785612  | -3.172014748 | 0.617329655 | -5.138283447 | 2.77E-07       | 1.20E-06    |
| Fasl       | 7.785479965  | -3.172640982 | 1.044063097 | -3.038744488 | 0.002375663    | 0.005532827 |
| Gna15      | 27.8599368   | -3.173008278 | 0.753272495 | -4.212298069 | 2.53E-05       | 8.39E-05    |
| Gm49392    | 1.424304929  | -3.173327855 | 2.390617066 | -1.327409521 | 0.184373252 NA |             |
| Matn4      | 9.637994523  | -3.174303189 | 0.869179389 | -3.652069101 | 0.000260136    | 0.000731694 |
| Rasgef1a   | 1.418451863  | -3.174739649 | 1.965539504 | -1.615200123 | 0.106267364 NA |             |
| Cxcl3      | 2.42804293   | -3.174740416 | 1.794646338 | -1.769006154 | 0.076892848    | 0.122873376 |
| Pif1       | 33.98906208  | -3.175239327 | 0.757166413 | -4.19358185  | 2.75E-05       | 9.05E-05    |
| Dnm3       | 80.16671377  | -3.175803439 | 0.468207086 | -6.782903403 | 1.18E-11       | 8.55E-11    |
| Cd8a       | 29.0642967   | -3.176707913 | 0.617953822 | -5.140688184 | 2.74E-07       | 1.19E-06    |
| Ptger4     | 39.31413408  | -3.177707582 | 0.490111368 | -6.483643901 | 8.95E-11       | 5.89E-10    |
| Def6       | 39.57245064  | -3.177826163 | 0.475129993 | -6.688329953 | 2.26E-11       | 1.59E-10    |
| Zdhhc15    | 9.14002903   | -3.178199283 | 1.048912893 | -3.029993533 | 0.00244559     | 0.005680165 |
| Klra2      | 141.9748701  | -3.178814334 | 0.463340899 | -6.860638334 | 6.86E-12       | 5.11E-11    |
| Trabd2b    | 45.53954108  | -3.178848069 | 0.586649705 | -5.418647688 | 6.01E-08       | 2.83E-07    |
| Slc30a3    | 18.531501    | -3.179896225 | 0.813569658 | -3.908572784 | 9.28E-05       | 0.000282489 |
| Arl11      | 48.35186431  | -3.180652447 | 0.432574512 | -7.35284294  | 1.94E-13       | 1.70E-12    |
| Cd300lb    | 36.70908009  | -3.180711091 | 0.509616819 | -6.24137778  | 4.34E-10       | 2.63E-09    |
| Ipcef1     | 28.13173504  | -3.18294293  | 0.670881718 | -4.744417454 | 2.09E-06       | 8.06E-06    |
| Col4a2     | 2353.372933  | -3.183224755 | 0.196037899 | -16.23780284 | 2.73E-59       | 6.19E-57    |
| Ism1       | 18.91630624  | -3.183370933 | 0.738650722 | -4.30971072  | 1.63E-05       | 5.58E-05    |
| Mt2        | 971.5352346  | -3.184187565 | 0.781546978 | -4.074211347 | 4.62E-05       | 0.000147207 |
| Ptprc      | 648.006669   | -3.184397865 | 0.319326903 | -9.972219183 | 2.02E-23       | 4.20E-22    |
| Igkv14-126 | 1.431992864  | -3.184701621 | 2.302099146 | -1.383390297 | 0.166545224 NA |             |
| Gm19935    | 5.464059156  | -3.187177557 | 1.276074469 | -2.497642289 | 0.012502228    | 0.024769621 |
| Igkv4-50   | 1.418278013  | -3.18825014  | 2.103581373 | -1.515629574 | 0.129613045 NA |             |
| Gm15016    | 1.461258595  | -3.188475377 | 1.731063525 | -1.841917025 | 0.065487288 NA |             |
| Stmn1      | 717.9268157  | -3.188870342 | 0.407293331 | -7.829419483 | 4.90E-15       | 5.02E-14    |
| Prss16     | 9.01318478   | -3.189271158 | 1.309557208 | -2.435381317 | 0.014876104    | 0.028874851 |
| Nksr1      | 56.36297257  | -3.189669002 | 0.614076349 | -5.194254765 | 2.06E-07       | 9.13E-07    |
| Nkd2       | 52.66036982  | -3.190482777 | 0.546928148 | -5.833458727 | 5.43E-09       | 2.89E-08    |
| Igkv8-28   | 5.337141542  | -3.190584586 | 1.55217842  | -2.055552728 | 0.039825648    | 0.069160401 |
| Pmaip1     | 97.40335985  | -3.191491949 | 0.53430956  | -5.973114062 | 2.33E-09       | 1.29E-08    |
| Gm47969    | 1.446561215  | -3.194609553 | 1.949491529 | -1.638688604 | 0.101278129 NA |             |
| Igkv2-137  | 5.876990199  | -3.195475753 | 1.264997789 | -2.526072205 | 0.011534577    | 0.023101677 |

|               |             |              |             |              |                |             |
|---------------|-------------|--------------|-------------|--------------|----------------|-------------|
| Fndc10        | 33.44978956 | -3.196334332 | 0.562336707 | -5.68402221  | 1.32E-08       | 6.71E-08    |
| Phldb1        | 667.9600714 | -3.198527945 | 0.250582668 | -12.76436226 | 2.59E-37       | 1.57E-35    |
| Crif1         | 6.343645423 | -3.198630059 | 1.272537762 | -2.513583608 | 0.011951145    | 0.023801766 |
| Pixna3        | 138.3350196 | -3.200708356 | 0.523132904 | -6.118346474 | 9.46E-10       | 5.54E-09    |
| Pdgfd         | 201.9146961 | -3.200866532 | 0.374890772 | -8.538131019 | 1.36E-17       | 1.78E-16    |
| Adgrg5        | 35.22329011 | -3.202641582 | 0.551832    | -5.803653254 | 6.49E-09       | 3.43E-08    |
| Cenpu         | 28.01556119 | -3.204713648 | 0.711853425 | -4.501929098 | 6.73E-06       | 2.44E-05    |
| Lrrc8e        | 72.85912299 | -3.204965609 | 0.408553763 | -7.844660611 | 4.34E-15       | 4.47E-14    |
| Gm6630        | 1.497378325 | -3.206041462 | 1.739914954 | -1.842642627 | 0.065381206 NA |             |
| Tesc          | 39.83416889 | -3.208272656 | 0.496099542 | -6.466993791 | 1.00E-10       | 6.53E-10    |
| Rpl17-ps10    | 1.48257676  | -3.208807625 | 2.307732565 | -1.390459048 | 0.164389527 NA |             |
| Fbxw15        | 4.969334638 | -3.208835661 | 1.449084319 | -2.214388506 | 0.026802065    | 0.048743504 |
| Ankrd34a      | 1.511420968 | -3.209240502 | 1.755455561 | -1.828152517 | 0.067526665 NA |             |
| P2ry12        | 72.08345652 | -3.210171384 | 0.444834144 | -7.216557955 | 5.33E-13       | 4.48E-12    |
| Igkv4-63      | 1.476503423 | -3.210443748 | 2.322459877 | -1.38234627  | 0.166865405 NA |             |
| Gm9097        | 1.514170941 | -3.210793328 | 1.869014446 | -1.717907175 | 0.085813548 NA |             |
| Rad54b        | 45.06098391 | -3.212822088 | 0.674993326 | -4.759783486 | 1.94E-06       | 7.50E-06    |
| Vldlr         | 217.1379921 | -3.214439285 | 0.4591133   | -7.001407455 | 2.53E-12       | 1.98E-11    |
| Pdzklip1      | 583.5645841 | -3.214473534 | 0.26923111  | -11.93945801 | 7.37E-33       | 3.19E-31    |
| Acot3         | 197.8386897 | -3.215451029 | 0.87899034  | -3.658118732 | 0.000254073    | 0.000715823 |
| Gm10662       | 1.469118677 | -3.216986056 | 2.820889788 | -1.140415365 | 0.254113295 NA |             |
| Gm5891        | 1.469118677 | -3.216986056 | 2.820889788 | -1.140415365 | 0.254113295 NA |             |
| Oxct2b        | 1.454462022 | -3.217942672 | 1.960582733 | -1.641319501 | 0.10073111 NA  |             |
| Tmod1         | 30.93250535 | -3.219141914 | 1.024271912 | -3.142858724 | 0.001673066    | 0.004022909 |
| Fbln1         | 136.3804663 | -3.221318516 | 0.451282887 | -7.138135759 | 9.46E-13       | 7.76E-12    |
| A730049H05Rik | 1.482588142 | -3.223394071 | 1.720230006 | -1.873815746 | 0.060955825 NA |             |
| Trbv2         | 1.508752666 | -3.223825072 | 2.40640286  | -1.339686353 | 0.180347336 NA |             |
| Mef2b         | 1.521379498 | -3.224863461 | 1.797439034 | -1.794143445 | 0.072790276 NA |             |
| Marcks        | 1434.432916 | -3.226657056 | 0.288378434 | -11.18896795 | 4.62E-29       | 1.49E-27    |
| Lst1          | 94.07746894 | -3.226680398 | 0.495011359 | -6.518396682 | 7.11E-11       | 4.74E-10    |
| Trim46        | 32.94341203 | -3.227111913 | 0.539800243 | -5.978344685 | 2.25E-09       | 1.26E-08    |
| Dkk3          | 228.5178141 | -3.228761528 | 0.428568473 | -7.533828854 | 4.93E-14       | 4.61E-13    |
| Ttc39a        | 53.3259899  | -3.229255809 | 0.477138147 | -6.767968206 | 1.31E-11       | 9.44E-11    |
| Cd226         | 6.092720667 | -3.230282851 | 1.171879888 | -2.756496534 | 0.005842423    | 0.012525356 |
| Ntrk3         | 54.0764518  | -3.23218663  | 0.451483328 | -7.159038728 | 8.12E-13       | 6.71E-12    |
| Gm13751       | 1.495190296 | -3.232508577 | 1.951524021 | -1.656402146 | 0.097640407 NA |             |
| Gm6136        | 5.592392938 | -3.233334042 | 1.328352904 | -2.434092651 | 0.014929173    | 0.028971263 |
| Syt5          | 3.177437059 | -3.23407049  | 1.489743978 | -2.170890125 | 0.029939479    | 0.053687624 |
| Adam19        | 131.7021126 | -3.235899726 | 0.284958938 | -11.35567024 | 6.95E-30       | 2.44E-28    |
| Zfp608        | 224.9196716 | -3.2361254   | 0.294365614 | -10.99355781 | 4.10E-28       | 1.23E-26    |
| Xfx1          | 44.22993299 | -3.236355425 | 0.487019189 | -6.645231846 | 3.03E-11       | 2.10E-10    |
| Capsl         | 11.88373803 | -3.239056132 | 0.876458731 | -3.695617396 | 0.000219353    | 0.000625863 |
| Slc8a2        | 3.307405014 | -3.239410809 | 1.512634489 | -2.141568789 | 0.032228198    | 0.057369355 |
| Ndrgr1        | 1835.035423 | -3.240060753 | 0.241502968 | -13.41623575 | 4.86E-41       | 3.98E-39    |
| Fblim1        | 266.6686498 | -3.240637671 | 0.247526879 | -13.0920637  | 3.66E-39       | 2.49E-37    |
| 1520401A03Rik | 4.217294223 | -3.24136592  | 1.346976981 | -2.406400381 | 0.016110597    | 0.031037797 |
| Atoh7         | 1.483675654 | -3.241874323 | 2.843745508 | -1.140001563 | 0.25428565 NA  |             |
| Tm4sf19       | 1.523193081 | -3.242696311 | 1.722738739 | -1.882291399 | 0.059796462 NA |             |
| Mcomp1        | 11.56071514 | -3.245203498 | 0.857247188 | -3.785609965 | 0.000153332    | 0.000449373 |
| Mcam          | 458.1753787 | -3.245287074 | 0.245546511 | -13.21658799 | 7.04E-40       | 5.15E-38    |
| Emilin2       | 90.35588592 | -3.246311653 | 0.442868433 | -7.330194285 | 2.30E-13       | 2.00E-12    |
| App           | 5757.357016 | -3.248594243 | 0.222105498 | -14.62635674 | 1.91E-48       | 2.54E-46    |
| Lpl           | 4172.86311  | -3.249611373 | 0.202413215 | -16.05434394 | 5.33E-58       | 1.15E-55    |
| Plcg2         | 141.0093962 | -3.251272283 | 0.341202797 | -9.528855889 | 1.59E-21       | 2.87E-20    |
| Gm12091       | 1.543235096 | -3.251710825 | 2.878083047 | -1.129818276 | 0.258552806 NA |             |
| Kif15         | 52.27213536 | -3.252153278 | 0.62460695  | -5.206719647 | 1.92E-07       | 8.58E-07    |
| Fcer1g        | 680.5279372 | -3.254003184 | 0.289120735 | -11.25482467 | 2.19E-29       | 7.29E-28    |
| Was           | 82.7704119  | -3.254251146 | 0.397708062 | -8.182512401 | 2.78E-16       | 3.21E-15    |
| Cstad         | 1.489758044 | -3.25490448  | 2.066865142 | -1.574802542 | 0.115302029 NA |             |
| Padi4         | 4.509384994 | -3.255152884 | 1.245171608 | -2.614220291 | 0.008943135    | 0.018357926 |
| Ephb1         | 4.701442509 | -3.255350077 | 1.514979355 | -2.148775206 | 0.031652224    | 0.056503362 |
| Nfam1         | 192.6610405 | -3.256532772 | 0.385210245 | -8.453910074 | 2.82E-17       | 3.58E-16    |
| Mboat1        | 117.6995669 | -3.256724231 | 0.408897916 | -7.96468336  | 1.66E-15       | 1.78E-14    |
| Slfn2         | 228.614609  | -3.257220283 | 0.248023831 | -13.13269078 | 2.14E-39       | 1.47E-37    |
| Rnf180        | 42.53590868 | -3.257919319 | 0.507501859 | -6.419521939 | 1.37E-10       | 8.80E-10    |
| Stgalnac4     | 64.09767106 | -3.258794317 | 0.374600097 | -8.699395286 | 3.34E-18       | 4.58E-17    |



|               |             |              |             |              |             |    |             |
|---------------|-------------|--------------|-------------|--------------|-------------|----|-------------|
| Vmn2r78       | 1.541552143 | -3.260540092 | 2.561221114 | -1.273041236 | 0.20300341  | NA |             |
| Mfap4         | 136.8723805 | -3.262855179 | 0.434212436 | -7.514421307 | 5.72E-14    |    | 5.30E-13    |
| Sfrp1         | 64.37542606 | -3.263498725 | 0.449941384 | -7.253164167 | 4.07E-13    |    | 3.46E-12    |
| Pcdhgb5       | 5.616027165 | -3.26358505  | 1.248965649 | -2.613030272 | 0.008974335 |    | 0.018413102 |
| Igsf1         | 53.96327369 | -3.263601203 | 0.729498546 | -4.473759712 | 7.69E-06    |    | 2.76E-05    |
| Fry           | 295.3020923 | -3.263884103 | 0.332315806 | -9.821633655 | 9.09E-23    |    | 1.79E-21    |
| Gm128         | 1.550556872 | -3.264823687 | 1.934446771 | -1.687729916 | 0.091463086 | NA |             |
| Gm49500       | 1.542308356 | -3.265367704 | 2.040234016 | -1.600486846 | 0.109490623 | NA |             |
| Adamts15      | 133.226142  | -3.266695765 | 0.526056373 | -6.209782707 | 5.31E-10    |    | 3.19E-09    |
| Zfp37         | 32.26985404 | -3.266723299 | 0.555947188 | -5.875959747 | 4.20E-09    |    | 2.27E-08    |
| Gm8623        | 1.571938366 | -3.269440174 | 1.742879146 | -1.875884614 | 0.060671126 | NA |             |
| Cav2          | 395.556594  | -3.271104142 | 0.380342365 | -8.600420166 | 7.94E-18    |    | 1.06E-16    |
| Tmem136       | 150.4487332 | -3.273689384 | 0.329610682 | -9.931988137 | 3.02E-23    |    | 6.18E-22    |
| Gltp          | 308.1595038 | -3.274292128 | 0.259717058 | -12.60715084 | 1.93E-36    |    | 1.10E-34    |
| Rps12-ps24    | 1.584373663 | -3.275386424 | 2.066570981 | -1.584937781 | 0.112980471 | NA |             |
| Kif3c         | 140.6032028 | -3.275757896 | 0.35745787  | -9.164039095 | 5.00E-20    |    | 7.99E-19    |
| Incenp        | 212.804727  | -3.276833483 | 0.39931876  | -8.206059445 | 2.29E-16    |    | 2.65E-15    |
| Dtl           | 89.4887726  | -3.277974469 | 0.601614313 | -5.448631124 | 5.08E-08    |    | 2.41E-07    |
| Pamr1         | 438.3313779 | -3.278574686 | 0.413311138 | -7.932461485 | 2.15E-15    |    | 2.28E-14    |
| S100a7a       | 1.541692259 | -3.278676204 | 1.981547976 | -1.654603494 | 0.098004954 | NA |             |
| 1700086D15Rik | 1.551771888 | -3.279059483 | 1.756238723 | -1.867092121 | 0.061888724 | NA |             |
| Igkv3-4       | 3.172334686 | -3.279910675 | 1.664641533 | -1.970340527 | 0.048799357 |    | 0.082688742 |
| BC055324      | 44.20489712 | -3.280006141 | 0.63661226  | -5.152282394 | 2.57E-07    |    | 1.12E-06    |
| Kcne4         | 20.13713106 | -3.280354563 | 0.841677262 | -3.897401902 | 9.72E-05    |    | 0.000294629 |
| Gria4         | 1.51067753  | -3.282804129 | 1.724937186 | -1.903144158 | 0.057021737 | NA |             |
| Tnfaip8l2     | 94.84967965 | -3.283516003 | 0.320267797 | -10.25240762 | 1.15E-24    |    | 2.66E-23    |
| Itgb4         | 143.6282823 | -3.285346774 | 0.3443753   | -9.540018622 | 1.43E-21    |    | 2.59E-20    |
| Ncf4          | 119.39402   | -3.286066877 | 0.431738325 | -7.611246647 | 2.71E-14    |    | 2.60E-13    |
| Igkv13-85     | 5.721799132 | -3.288222053 | 1.473265469 | -2.231927729 | 0.02561974  |    | 0.046792942 |
| Egflam        | 116.5555538 | -3.288266785 | 0.519641279 | -6.327955302 | 2.48E-10    |    | 1.55E-09    |
| Kcnn3         | 9.645495704 | -3.29065596  | 0.901556113 | -3.649973541 | 0.000262267 |    | 0.000737203 |
| Ppp1r3a       | 1.568539249 | -3.290861654 | 1.948900967 | -1.688573052 | 0.091301279 | NA |             |
| Iqgap1        | 893.5034034 | -3.292124133 | 0.194200138 | -16.95222349 | 1.85E-64    |    | 5.85E-62    |
| Abcg4         | 1.657595549 | -3.293716958 | 1.874162347 | -1.757434175 | 0.078843832 |    | 0.125631335 |
| Fam171b       | 125.5524286 | -3.294084866 | 0.492836149 | -6.683935164 | 2.33E-11    |    | 1.63E-10    |
| Prr11         | 57.52247958 | -3.296787422 | 0.517816042 | -6.366715503 | 1.93E-10    |    | 1.22E-09    |
| Epcam         | 384.685715  | -3.298126195 | 0.407818057 | -8.08724906  | 6.10E-16    |    | 6.81E-15    |
| Ninl          | 151.2518461 | -3.299662495 | 0.377481933 | -8.741246146 | 2.31E-18    |    | 3.21E-17    |
| Ttk           | 67.46436691 | -3.29987445  | 0.567245444 | -5.817366164 | 5.98E-09    |    | 3.18E-08    |
| Vxn           | 5.811965637 | -3.299983438 | 1.237051201 | -2.667620737 | 0.007639044 |    | 0.015952493 |
| Cd101         | 8.605313406 | -3.300014498 | 1.092769593 | -3.019863033 | 0.00252889  |    | 0.005854175 |
| Gpr85         | 2.742013363 | -3.300522593 | 1.520544589 | -2.170618749 | 0.029960004 |    | 0.053713129 |
| Cd52          | 442.3612532 | -3.300712217 | 0.345017885 | -9.566785845 | 1.10E-21    |    | 2.02E-20    |
| Fzd2          | 14.66350493 | -3.30134278  | 0.92219763  | -3.57986474  | 0.000343772 |    | 0.000944501 |
| Cyp1b1        | 111.6932295 | -3.301391974 | 0.402502223 | -8.202170794 | 2.36E-16    |    | 2.74E-15    |
| Gm16464       | 1.612736319 | -3.301680165 | 2.013951097 | -1.639404338 | 0.101129079 | NA |             |
| Ccdc92        | 19.79602601 | -3.301907772 | 0.730022481 | -4.52302204  | 6.10E-06    |    | 2.22E-05    |
| Scg5          | 1.590111017 | -3.301930638 | 1.929247833 | -1.711511907 | 0.086986655 | NA |             |
| Lynx1         | 113.3757601 | -3.302169871 | 0.562743899 | -5.867979871 | 4.41E-09    |    | 2.38E-08    |
| Wnk2          | 97.7067344  | -3.303303961 | 0.508263866 | -6.499191038 | 8.08E-11    |    | 5.34E-10    |
| Gm10273       | 1.554148242 | -3.306040686 | 3.477983506 | -0.950562497 | NA          | NA |             |
| Ubxn11        | 16.53774315 | -3.30673003  | 0.802428306 | -4.12090402  | 3.77E-05    |    | 0.000121897 |
| Pdp1          | 107.6852324 | -3.307864868 | 0.364575876 | -9.073186367 | 1.16E-19    |    | 1.78E-18    |
| Ntrk2         | 230.7690302 | -3.308184118 | 0.393656064 | -8.403742298 | 4.32E-17    |    | 5.40E-16    |
| Irx5          | 3.27925903  | -3.308320746 | 1.900384449 | -1.740869194 | 0.08170651  |    | 0.129587178 |
| Ndc80         | 53.98586065 | -3.309050276 | 0.719501453 | -4.599087693 | 4.24E-06    |    | 1.58E-05    |
| Clec4b1       | 9.592905341 | -3.309725823 | 1.119193114 | -2.957242841 | 0.003104035 |    | 0.007062271 |
| Trim50        | 1.544742552 | -3.309843999 | 2.91333293  | -1.136102216 | NA          | NA |             |
| Kif6          | 3.350790495 | -3.312360136 | 1.72273986  | -1.922727983 | 0.054514221 |    | 0.090873026 |
| Spsb1         | 98.1731907  | -3.312819043 | 0.446554613 | -7.418620128 | 1.18E-13    |    | 1.06E-12    |
| C2cd4c        | 27.19315291 | -3.313831235 | 0.670731436 | -4.940623114 | 7.79E-07    |    | 3.19E-06    |
| Polq          | 27.30094521 | -3.315403327 | 0.828348499 | -4.002425706 | 6.27E-05    |    | 0.000195581 |
| Cit           | 119.3338706 | -3.316269835 | 0.364543763 | -9.09704175  | 9.28E-20    |    | 1.45E-18    |
| Rbm44         | 4.231743243 | -3.318190772 | 1.554440118 | -2.134653328 | 0.032789338 |    | 0.058252671 |
| Gm9457        | 1.643997282 | -3.319444122 | 1.818580749 | -1.825293776 | 0.067956709 |    | 0.110335807 |
| Sox9          | 834.47549   | -3.319699957 | 0.234480021 | -14.15770922 | 1.67E-45    |    | 1.84E-43    |

|               |             |              |             |              |                |             |
|---------------|-------------|--------------|-------------|--------------|----------------|-------------|
| 1700030C10Rik | 23.34184228 | -3.319706779 | 0.972903449 | -3.412164674 | 0.000644492    | 0.001687497 |
| Has2          | 3.314699524 | -3.322415638 | 1.563753038 | -2.124642164 | 0.033616483    | 0.059492764 |
| Cdsn          | 3.27842945  | -3.322969182 | 1.528785625 | -2.173600488 | 0.029735152    | 0.053360512 |
| Itga3         | 1047.75915  | -3.323565376 | 0.241466615 | -13.76407822 | 4.19E-43       | 3.88E-41    |
| Cdc6          | 28.87198457 | -3.327276257 | 0.803410814 | -4.141438228 | 3.45E-05       | 0.000112287 |
| Gm43720       | 1.6134613   | -3.328152908 | 2.807060504 | -1.185636328 | 0.235765949 NA |             |
| Gpr171        | 8.777201358 | -3.328328102 | 0.996387444 | -3.340395468 | 0.000836592    | 0.002142117 |
| Fam131a       | 33.68601105 | -3.329479797 | 0.630913889 | -5.277233316 | 1.31E-07       | 5.94E-07    |
| Wdfy4         | 168.4181292 | -3.330783436 | 0.417210232 | -7.983465372 | 1.42E-15       | 1.54E-14    |
| Crisp3        | 1.613550879 | -3.331111103 | 2.39854433  | -1.388805311 | 0.16489196 NA  |             |
| Sbk2          | 1.644317804 | -3.331955123 | 1.909661474 | -1.744788366 | 0.081021715    | 0.128644704 |
| Dsg1c         | 704.5630426 | -3.331955279 | 0.456461097 | -7.299538346 | 2.89E-13       | 2.49E-12    |
| Sirpa         | 1337.608517 | -3.33197194  | 0.268850492 | -12.39340092 | 2.84E-35       | 1.47E-33    |
| Bcam          | 726.8818237 | -3.332183663 | 0.253618531 | -13.13856544 | 1.98E-39       | 1.37E-37    |
| Gipc2         | 101.5446959 | -3.334109909 | 0.428651599 | -7.778134768 | 7.36E-15       | 7.43E-14    |
| Tmsb10        | 1598.5996   | -3.334625443 | 0.325466302 | -10.24568572 | 1.24E-24       | 2.83E-23    |
| Katnal2       | 1.57703892  | -3.335758992 | 1.737826363 | -1.919500742 | 0.054920993 NA |             |
| Xkr5          | 1.615917296 | -3.336127531 | 1.788498346 | -1.865323241 | 0.062136109 NA |             |
| Cerk          | 401.9582573 | -3.336742738 | 0.255337052 | -13.06799273 | 5.02E-39       | 3.38E-37    |
| Evc2          | 104.3756397 | -3.337197066 | 0.469321491 | -7.110684539 | 1.15E-12       | 9.36E-12    |
| C1qb          | 2187.062719 | -3.338893604 | 0.245601954 | -13.59473548 | 4.30E-42       | 3.80E-40    |
| Ak8           | 1.6204477   | -3.33959245  | 1.986901392 | -1.680804323 | 0.092800929 NA |             |
| S100a4        | 72.344427   | -3.340355188 | 0.513523772 | -6.504772261 | 7.78E-11       | 5.16E-10    |
| Gpr153        | 73.79750373 | -3.34324493  | 0.495457823 | -6.747789165 | 1.50E-11       | 1.08E-10    |
| Pacrg         | 9.122785569 | -3.344042408 | 1.027876789 | -3.253349472 | 0.001140531    | 0.00284557  |
| Tbc1d9        | 105.0740226 | -3.346721639 | 0.35917493  | -9.317804117 | 1.19E-20       | 2.00E-19    |
| Nav3          | 12.95413465 | -3.348355173 | 0.863970419 | -3.875543768 | 0.000106387    | 0.000320156 |
| Gm15454       | 1.658183832 | -3.34850916  | 2.363002191 | -1.417057154 | 0.156466218    | 0.225747807 |
| Apod          | 1.725991105 | -3.348513262 | 1.739794899 | -1.924659777 | 0.054271936    | 0.090539971 |
| Igkv8-30      | 6.311810628 | -3.349266502 | 1.199288937 | -2.792710246 | 0.005226849    | 0.011318766 |
| Gm7812        | 1.674185676 | -3.34995051  | 1.750251393 | -1.913982485 | 0.055622394    | 0.092458129 |
| Ptpn7         | 53.37364062 | -3.350784613 | 0.585979296 | -5.718264512 | 1.08E-08       | 5.56E-08    |
| Ighv2-3       | 1.648189106 | -3.353278468 | 1.758993741 | -1.906361796 | 0.056603282    | 0.09388721  |
| Csf2          | 1.650247678 | -3.353918602 | 1.704740497 | -1.967407126 | 0.049136293    | 0.083119223 |
| Sox11         | 25.94318686 | -3.354148071 | 0.878133716 | -3.819632488 | 0.000133651    | 0.000395294 |
| Clec4n        | 122.6317575 | -3.35802498  | 0.401640023 | -8.360782754 | 6.23E-17       | 7.62E-16    |
| Mmgt2         | 124.905495  | -3.358899596 | 0.29341249  | -11.44770488 | 2.41E-30       | 8.74E-29    |
| Lyl1          | 90.34713582 | -3.359176746 | 0.378923476 | -8.865053125 | 7.65E-19       | 1.11E-17    |
| Ppl           | 1150.092776 | -3.359497695 | 0.263607583 | -12.74431356 | 3.35E-37       | 2.02E-35    |
| Slc1a1        | 3.233782372 | -3.359693105 | 1.435648621 | -2.340191783 | 0.01927384     | 0.036367506 |
| Aurka         | 111.1599954 | -3.359866838 | 0.505340445 | -6.64871944  | 2.96E-11       | 2.05E-10    |
| Efcab15       | 1.618816474 | -3.360975891 | 2.293505531 | -1.465431779 | 0.142803152 NA |             |
| Clip2         | 263.0161196 | -3.361254107 | 0.285460473 | -11.77484951 | 5.26E-32       | 2.16E-30    |
| Nptxr         | 46.74955973 | -3.361797544 | 0.564216801 | -5.958343564 | 2.55E-09       | 1.41E-08    |
| Cd44          | 411.6145091 | -3.362588791 | 0.248541507 | -13.52928461 | 1.05E-41       | 8.87E-40    |
| Igsf3         | 59.40299719 | -3.364175524 | 0.534656103 | -6.29222318  | 3.13E-10       | 1.93E-09    |
| Fxyd5         | 349.9270237 | -3.364453634 | 0.201486465 | -16.69816199 | 1.35E-62       | 3.60E-60    |
| Tnfrsf11a     | 122.318374  | -3.364774317 | 0.330137595 | -10.19203619 | 2.15E-24       | 4.82E-23    |
| Sema3b        | 123.8582336 | -3.365889109 | 0.518096432 | -6.496645996 | 8.21E-11       | 5.42E-10    |
| Gins2         | 82.11327736 | -3.365992992 | 0.647818207 | -5.195891314 | 2.04E-07       | 9.05E-07    |
| Celsr3        | 5.071726318 | -3.366499956 | 1.615613249 | -2.083728862 | 0.037184837    | 0.065051525 |
| Lpar5         | 4.064257612 | -3.366577067 | 1.404399022 | -2.397165631 | 0.016522453    | 0.031734428 |
| Spta1         | 1.636133576 | -3.367244258 | 1.887322966 | -1.784137807 | 0.074401275    | 0.119355692 |
| Ubt2          | 44.08989338 | -3.368049132 | 0.48040046  | -7.010919874 | 2.37E-12       | 1.86E-11    |
| Casp12        | 240.7831202 | -3.36890443  | 0.264979475 | -12.71383162 | 4.95E-37       | 2.94E-35    |
| Il1rl2        | 29.65764389 | -3.369092984 | 0.602511161 | -5.591751986 | 2.25E-08       | 1.12E-07    |
| Dusp5         | 85.56525065 | -3.371093219 | 0.415115891 | -8.120848409 | 4.63E-16       | 5.23E-15    |
| Clec4e        | 11.23184446 | -3.372424063 | 1.038260928 | -3.248146947 | 0.001161593    | 0.002895574 |
| Ascl2         | 1.762834572 | -3.372756468 | 1.693080119 | -1.992083204 | 0.046361929    | 0.079093183 |
| Axl           | 1024.368563 | -3.375507997 | 0.314040712 | -10.74863183 | 6.01E-27       | 1.64E-25    |
| Vep1          | 90.95013197 | -3.375767048 | 0.359230893 | -9.397206947 | 5.60E-21       | 9.66E-20    |
| Ptk7          | 127.3937306 | -3.375787603 | 0.39265995  | -8.597229247 | 8.17E-18       | 1.08E-16    |
| Syt12         | 88.35561938 | -3.377300368 | 0.526856829 | -6.410281088 | 1.45E-10       | 9.33E-10    |
| Schip1        | 124.1033532 | -3.377637935 | 0.362679037 | -9.313022236 | 1.24E-20       | 2.08E-19    |
| Gm10548       | 3.276930767 | -3.378227417 | 1.702170739 | -1.984658378 | 0.047182493    | 0.08030822  |
| Cldn23        | 16.17801444 | -3.380246445 | 0.906124293 | -3.730444565 | 0.000191142    | 0.000550996 |



|           |             |              |             |              |             |             |
|-----------|-------------|--------------|-------------|--------------|-------------|-------------|
| Tulp3     | 228.0735383 | -3.380586708 | 0.292909449 | -11.54140546 | 8.16E-31    | 3.06E-29    |
| Dbn1      | 192.7641318 | -3.380616767 | 0.300543661 | -11.2483383  | 2.36E-29    | 7.78E-28    |
| Bdkrb2    | 17.85928084 | -3.381043024 | 0.866088574 | -3.903807446 | 9.47E-05    | 0.000287548 |
| Adap1     | 112.4003305 | -3.381086877 | 0.433441216 | -7.800566147 | 6.16E-15    | 6.26E-14    |
| Ncf2      | 260.7818123 | -3.381766198 | 0.293034515 | -11.54050472 | 8.24E-31    | 3.09E-29    |
| Stx1a     | 101.7989303 | -3.381832544 | 0.472048166 | -7.164168374 | 7.83E-13    | 6.48E-12    |
| Epha4     | 62.55280418 | -3.382868973 | 0.571135522 | -5.923058259 | 3.16E-09    | 1.74E-08    |
| Plxdc2    | 71.33854058 | -3.383810415 | 0.515860958 | -6.559539658 | 5.40E-11    | 3.65E-10    |
| Cnih2     | 9.399938437 | -3.38462311  | 1.020330712 | -3.317182431 | 0.000909302 | 0.002313381 |
| Enah      | 1156.475664 | -3.386586356 | 0.259570619 | -13.04687859 | 6.62E-39    | 4.43E-37    |
| Adamts12  | 61.92485282 | -3.387651445 | 0.507145542 | -6.679840725 | 2.39E-11    | 1.68E-10    |
| Fut4      | 25.57178949 | -3.388889204 | 0.6037752   | -5.612832733 | 1.99E-08    | 9.95E-08    |
| Lrrc25    | 92.59259213 | -3.39030001  | 0.383939024 | -8.830308447 | 1.04E-18    | 1.50E-17    |
| Synpo     | 605.8187596 | -3.390371972 | 0.280547273 | -12.08485094 | 1.27E-33    | 5.88E-32    |
| Coro1a    | 623.6191876 | -3.390735147 | 0.266467779 | -12.72474727 | 4.31E-37    | 2.57E-35    |
| S100a8    | 60.80153866 | -3.392543047 | 0.499504061 | -6.791822751 | 1.11E-11    | 8.08E-11    |
| Serpinb6a | 1057.168374 | -3.393149007 | 0.243937676 | -13.90990132 | 5.52E-44    | 5.37E-42    |
| Smim40    | 3.418104064 | -3.395147687 | 1.468658919 | -2.311733271 | 0.020792387 | 0.038897027 |
| Galnt18   | 63.81904322 | -3.396246351 | 0.627030485 | -5.4163975   | 6.08E-08    | 2.86E-07    |
| Nrm       | 73.06296813 | -3.400176278 | 0.452633045 | -7.51199302  | 5.82E-14    | 5.39E-13    |
| Olfml3    | 308.9826682 | -3.400960953 | 0.258322125 | -13.16558134 | 1.38E-39    | 9.88E-38    |
| Efhb      | 3.431181414 | -3.401476923 | 1.421647415 | -2.392630471 | 0.016728079 | 0.032064346 |
| Ptn       | 8.15286588  | -3.401776419 | 1.12117393  | -3.034120155 | 0.002412383 | 0.005610684 |
| Igkv1-122 | 1.707558628 | -3.402305407 | 2.012816042 | -1.69032109  | 0.090966542 | 0.142484162 |
| Nanos1    | 7.272891203 | -3.402314622 | 1.355785349 | -2.509478824 | 0.012090946 | 0.02403126  |
| Gm8170    | 1.692822662 | -3.402645445 | 1.898396663 | -1.792378543 | 0.07307235  | 0.117500228 |
| Timp3     | 1977.746307 | -3.406858253 | 0.300291127 | -11.34518454 | 7.84E-30    | 2.73E-28    |
| Slc22a26  | 35.12993094 | -3.408367978 | 0.642803108 | -5.302351427 | 1.14E-07    | 5.22E-07    |
| Mdga1     | 12.67691601 | -3.408672094 | 0.966598276 | -3.526462004 | 0.000421152 | 0.001140193 |
| Mgp       | 261.496719  | -3.409719264 | 0.383280329 | -8.896149916 | 5.78E-19    | 8.44E-18    |
| Arhgap20  | 3.324539426 | -3.411294622 | 1.490643302 | -2.288471439 | 0.022110082 | 0.041131893 |
| Panx2     | 3.905372573 | -3.411884174 | 1.80882528  | -1.886243084 | 0.059262205 | 0.097737179 |
| Npdc1     | 709.9183848 | -3.412999894 | 0.174600054 | -19.54753053 | 4.33E-85    | 5.68E-82    |
| Nxpe1-ps  | 6.621922632 | -3.414024323 | 1.385604709 | -2.46392373  | 0.013742535 | 0.026910491 |
| Bcl2      | 168.6349564 | -3.417089933 | 0.307275088 | -11.12062143 | 9.96E-29    | 3.12E-27    |
| Mastl     | 73.95572249 | -3.417103334 | 0.595081097 | -5.742248158 | 9.34E-09    | 4.87E-08    |
| Ncf1      | 288.0551451 | -3.418658521 | 0.229136977 | -14.91971558 | 2.45E-50    | 3.64E-48    |
| Tmem86a   | 584.8525791 | -3.420181544 | 0.264789549 | -12.91660324 | 3.63E-38    | 2.32E-36    |
| Nckap1l   | 443.748564  | -3.421262806 | 0.251153067 | -13.62222189 | 2.95E-42    | 2.66E-40    |
| Parp8     | 149.4191727 | -3.423039067 | 0.390218764 | -8.772102677 | 1.75E-18    | 2.46E-17    |
| Nectin4   | 29.11375136 | -3.425779492 | 0.584348457 | -5.862562743 | 4.56E-09    | 2.46E-08    |
| Gm7045    | 1.724325046 | -3.425942431 | 1.749205268 | -1.95857084  | 0.050163067 | 0.084612642 |
| Vps37d    | 90.04048407 | -3.427513106 | 0.52620704  | -6.513620766 | 7.34E-11    | 4.87E-10    |
| Ccdc88a   | 91.08551419 | -3.429463967 | 0.491543364 | -6.97693066  | 3.02E-12    | 2.33E-11    |
| Cd72      | 223.434318  | -3.43116813  | 0.449272907 | -7.637157897 | 2.22E-14    | 2.14E-13    |
| Slc2a6    | 20.64977086 | -3.431268538 | 0.706628619 | -4.855830129 | 1.20E-06    | 4.79E-06    |
| Rpl35-ps1 | 1.765481164 | -3.432526229 | 1.819552581 | -1.886467182 | 0.059232027 | 0.097705621 |
| Gm43712   | 1.759994489 | -3.433471458 | 1.698505536 | -2.021466157 | 0.043231532 | 0.074332946 |
| Arhgap11a | 218.522807  | -3.433912894 | 0.343640448 | -9.992749438 | 1.64E-23    | 3.45E-22    |
| Il10ra    | 305.63991   | -3.434169305 | 0.29182148  | -11.7680484  | 5.70E-32    | 2.32E-30    |
| Tmem246   | 63.00411202 | -3.434380106 | 0.526830794 | -6.518943359 | 7.08E-11    | 4.72E-10    |
| B4galnt4  | 12.62350034 | -3.436632236 | 1.115030065 | -3.082098271 | 0.00205547  | 0.004846701 |
| Aoah      | 108.1450446 | -3.437131311 | 0.390562864 | -8.80045602  | 1.36E-18    | 1.93E-17    |
| Htra3     | 183.8008856 | -3.437244297 | 0.877603479 | -3.91662565  | 8.98E-05    | 0.000273759 |
| Amz1      | 73.71685513 | -3.438085966 | 0.514099637 | -6.687586835 | 2.27E-11    | 1.59E-10    |
| Smoc2     | 628.1120099 | -3.438405664 | 0.3929892   | -8.74936426  | 2.15E-18    | 3.00E-17    |
| Osmr      | 436.6006364 | -3.438819056 | 0.31348071  | -10.96979479 | 5.34E-28    | 1.59E-26    |
| Ighv8-5   | 1.760080412 | -3.43935688  | 2.434613669 | -1.412691025 | 0.157746592 | 0.227248935 |
| Cox4i2    | 6.426983825 | -3.440679886 | 1.222561367 | -2.814320802 | 0.004888042 | 0.010645292 |
| Entpd1    | 191.868322  | -3.442953109 | 0.297275456 | -11.58169313 | 5.10E-31    | 1.94E-29    |
| Bhlhb9    | 225.6885158 | -3.443263712 | 0.285566686 | -12.05765196 | 1.77E-33    | 8.04E-32    |
| Perm1     | 3.636309558 | -3.443584357 | 1.455415798 | -2.366048494 | 0.017979089 | 0.034193163 |
| Pvrig     | 1.743099249 | -3.443706571 | 1.692442268 | -2.034755711 | 0.041875459 | 0.072227118 |
| Tyrobp    | 590.9919069 | -3.444023204 | 0.320650821 | -10.74072786 | 6.55E-27    | 1.78E-25    |
| Ehd2      | 465.9537493 | -3.44453395  | 0.278404321 | -12.37241554 | 3.69E-35    | 1.90E-33    |
| Pcdhb18   | 3.637987508 | -3.44680066  | 1.46027542  | -2.360377099 | 0.018256366 | 0.034670217 |

|            |             |              |             |              |             |             |
|------------|-------------|--------------|-------------|--------------|-------------|-------------|
| Exoc3l4    | 199.322542  | -3.446928484 | 0.484140495 | -7.119686366 | 1.08E-12    | 8.80E-12    |
| Cxcl16     | 764.3970211 | -3.449121753 | 0.20763735  | -16.61127807 | 5.77E-62    | 1.49E-59    |
| Golm1      | 430.3525966 | -3.44982793  | 0.246906248 | -13.97221803 | 2.30E-44    | 2.34E-42    |
| Pitpnm3    | 60.85894688 | -3.450267358 | 0.564768949 | -6.109166173 | 1.00E-09    | 5.84E-09    |
| Bmper      | 46.5012887  | -3.450604989 | 0.812280694 | -4.248045058 | 2.16E-05    | 7.23E-05    |
| Dcdc2a     | 739.3960719 | -3.451110699 | 0.419578428 | -8.225186199 | 1.95E-16    | 2.28E-15    |
| Lig1       | 372.5211843 | -3.452103114 | 0.401847969 | -8.590570007 | 8.65E-18    | 1.15E-16    |
| Igkv11-114 | 1.742461032 | -3.453051463 | 1.866807583 | -1.849709362 | 0.06435545  | 0.105047579 |
| Zfp827     | 65.82751025 | -3.456209358 | 0.523280825 | -6.604884402 | 3.98E-11    | 2.72E-10    |
| Prr5l      | 76.56686511 | -3.458087007 | 0.450798625 | -7.671023859 | 1.71E-14    | 1.66E-13    |
| H2-DMa     | 254.7162125 | -3.45878033  | 0.392841018 | -8.804529491 | 1.31E-18    | 1.87E-17    |
| Tnfrsf18   | 1.733051136 | -3.459858923 | 1.902884999 | -1.818217561 | 0.069030887 | 0.111834891 |
| Tmem132a   | 164.5955434 | -3.462174398 | 0.367590042 | -9.418575041 | 4.57E-21    | 7.97E-20    |
| Tor4a      | 298.026216  | -3.463845861 | 0.259521228 | -13.34706179 | 1.23E-40    | 9.72E-39    |
| Gal3st1    | 212.7169591 | -3.464392464 | 0.289178202 | -11.98013003 | 4.52E-33    | 1.97E-31    |
| Mtmt11     | 256.3941994 | -3.464458731 | 0.375515451 | -9.225875318 | 2.81E-20    | 4.60E-19    |
| Kcnj14     | 11.00353448 | -3.464938569 | 1.269365726 | -2.729661355 | 0.006339941 | 0.013470005 |
| Ighv1-5    | 1.752317926 | -3.46521933  | 1.661609218 | -2.085459862 | 0.037027578 | 0.064815791 |
| Nusap1     | 136.1973783 | -3.465725951 | 0.629015276 | -5.509764365 | 3.59E-08    | 1.74E-07    |
| Alox5ap    | 162.964309  | -3.466352602 | 0.325278208 | -10.65657803 | 1.62E-26    | 4.29E-25    |
| Kif20b     | 97.2627166  | -3.467841892 | 0.535874392 | -6.471370794 | 9.71E-11    | 6.36E-10    |
| Olfm2      | 143.2818849 | -3.468356214 | 0.38782612  | -8.943070196 | 3.79E-19    | 5.64E-18    |
| Nsg2       | 3.599537417 | -3.471005873 | 1.440923941 | -2.40887515  | 0.016001771 | 0.030852544 |
| Rps19-ps6  | 1.812345851 | -3.47124744  | 1.648921818 | -2.105161932 | 0.035277215 | 0.062058194 |
| Paqr6      | 29.39222801 | -3.471767712 | 0.711520026 | -4.879367529 | 1.06E-06    | 4.28E-06    |
| Laptm5     | 1044.945122 | -3.472512315 | 0.247464486 | -14.03236632 | 9.88E-45    | 1.05E-42    |
| Gm12294    | 1.817908355 | -3.474755929 | 1.649626891 | -2.106388995 | 0.035170576 | 0.061902538 |
| Pwwp3b     | 30.87115868 | -3.474953795 | 0.688706063 | -5.045626842 | 4.52E-07    | 1.90E-06    |
| Cd8b1      | 12.79090974 | -3.475467774 | 0.954477344 | -3.641226056 | 0.000271343 | 0.000760331 |
| Mturn      | 277.5716147 | -3.476310482 | 0.288644972 | -12.04355113 | 2.10E-33    | 9.46E-32    |
| Adam22     | 16.54320707 | -3.476386744 | 0.86218049  | -4.032086997 | 5.53E-05    | 0.000173857 |
| Gzmb       | 20.40691326 | -3.477632141 | 0.775874028 | -4.482212338 | 7.39E-06    | 2.66E-05    |
| Cpxm2      | 47.38775933 | -3.478419863 | 0.611655487 | -5.686893907 | 1.29E-08    | 6.61E-08    |
| Negr1      | 2.008029623 | -3.478601947 | 2.157590515 | -1.612262347 | 0.106904863 | 0.163336988 |
| Efemp1     | 1201.863206 | -3.478813018 | 0.31337411  | -11.10115007 | 1.24E-28    | 3.84E-27    |
| Il33       | 166.2396613 | -3.479381792 | 0.350935387 | -9.914593733 | 3.60E-23    | 7.31E-22    |
| Icosl      | 135.6550806 | -3.479445898 | 0.322283717 | -10.79621996 | 3.59E-27    | 9.98E-26    |
| Sct        | 1.734926407 | -3.479915148 | 1.992479923 | -1.746524574 | 0.080719841 | 0.128198004 |
| Erbb2      | 168.2569404 | -3.482397362 | 0.359844539 | -9.677505108 | 3.76E-22    | 7.09E-21    |
| Arhgef33   | 1.822843837 | -3.482974609 | 2.735396609 | -1.273297845 | 0.202912371 | 0.280795921 |
| Ptprc      | 319.9867351 | -3.483139832 | 0.259944878 | -13.39953246 | 6.08E-41    | 4.94E-39    |
| Knstrn     | 145.2538157 | -3.483145596 | 0.533822427 | -6.524914315 | 6.80E-11    | 4.55E-10    |
| Gm14173    | 1.794891721 | -3.483255745 | 1.680271062 | -2.073032038 | 0.038169298 | 0.066609703 |
| Abcc8      | 1.8884877   | -3.48445872  | 2.490332966 | -1.39919391  | 0.161754842 | 0.231885149 |
| Fam205a2   | 1.807658051 | -3.485434452 | 1.702620053 | -2.047100552 | 0.040648213 | 0.070416699 |
| Ccdc9b     | 435.1158038 | -3.485464721 | 0.29557503  | -11.79214877 | 4.28E-32    | 1.78E-30    |
| Cd300c2    | 186.7869539 | -3.485690629 | 0.335396722 | -10.3927391  | 2.68E-25    | 6.43E-24    |
| Arhgdig    | 1.798886735 | -3.485787293 | 1.868839524 | -1.865214883 | 0.06215129  | 0.101880307 |
| Prrx2      | 1.780661567 | -3.486163113 | 1.867850264 | -1.866403951 | 0.061984871 | 0.101663593 |
| Tmem173    | 221.9225321 | -3.486753484 | 0.347940507 | -10.02111974 | 1.23E-23    | 2.61E-22    |
| Eci3       | 1.819265506 | -3.48732255  | 1.690744856 | -2.062595393 | 0.039151086 | 0.068131375 |
| Rimbp3     | 1.809552708 | -3.487468325 | 2.019342745 | -1.727031399 | 0.084162025 | 0.13311014  |
| Cd83       | 92.30300428 | -3.48918096  | 0.49892904  | -6.993341094 | 2.68E-12    | 2.09E-11    |
| Pld4       | 579.3842457 | -3.490482487 | 0.251527622 | -13.87713392 | 8.72E-44    | 8.39E-42    |
| Slfn1      | 60.16476585 | -3.493774009 | 0.471284304 | -7.413304412 | 1.23E-13    | 1.10E-12    |
| Myzap      | 133.021601  | -3.493927575 | 0.353344364 | -9.888165585 | 4.69E-23    | 9.36E-22    |
| Gm13378    | 1.810034973 | -3.494732441 | 3.434761394 | -1.017460033 | 0.308934636 | 0.3995689   |
| Ltk        | 45.80703938 | -3.495162027 | 0.587254086 | -5.951703211 | 2.65E-09    | 1.47E-08    |
| Fam102b    | 144.787213  | -3.495254112 | 0.346559071 | -10.08559408 | 6.40E-24    | 1.38E-22    |
| Tnfrsf12a  | 1100.509548 | -3.495625052 | 0.346992599 | -10.07406229 | 7.19E-24    | 1.55E-22    |
| Tdrd9      | 2.00797381  | -3.497316652 | 2.212767329 | -1.580517123 | 0.113988489 | 0.172797062 |
| Dpysl3     | 184.2448421 | -3.497531972 | 0.27965061  | -12.50679185 | 6.85E-36    | 3.71E-34    |
| Ly86       | 367.5208489 | -3.498154316 | 0.315206269 | -11.09798458 | 1.28E-28    | 3.97E-27    |
| Scn8a      | 174.8797853 | -3.500289599 | 0.371799397 | -9.414457448 | 4.76E-21    | 8.27E-20    |
| Ighv1-42   | 1.756013879 | -3.500917255 | 2.395755592 | -1.461299837 | 0.143933175 | 0.210217416 |
| Msantd3    | 61.85398002 | -3.501142413 | 0.489761137 | -7.148673399 | 8.76E-13    | 7.21E-12    |

|            |             |              |             |              |             |             |
|------------|-------------|--------------|-------------|--------------|-------------|-------------|
| Mamstr     | 11.69885985 | -3.504907564 | 0.898125058 | -3.902471635 | 9.52E-05    | 0.000288986 |
| Krt83      | 1.77344312  | -3.508184961 | 1.694574853 | -2.070244908 | 0.038429416 | 0.066995059 |
| Tifab      | 208.3177885 | -3.510505983 | 0.383125665 | -9.162805595 | 5.06E-20    | 8.07E-19    |
| Lhfp1      | 1.812495074 | -3.511030841 | 1.928931966 | -1.820194234 | 0.068729431 | 0.111399443 |
| Lrrn2      | 3.688215767 | -3.512278902 | 1.48377406  | -2.367125155 | 0.017926869 | 0.03410907  |
| Thbs4      | 19.1668241  | -3.513606713 | 0.972352483 | -3.613511328 | 0.000302078 | 0.000838188 |
| Cdca7l     | 32.67045686 | -3.514345409 | 0.820605389 | -4.282625309 | 1.85E-05    | 6.26E-05    |
| Tceal7     | 1.778534224 | -3.518051205 | 2.332214695 | -1.508459411 | 0.131436988 | 0.194728232 |
| Prc1       | 161.595825  | -3.518273671 | 0.544765175 | -6.458330733 | 1.06E-10    | 6.89E-10    |
| Slain1     | 16.21259291 | -3.519819908 | 0.910938387 | -3.863949482 | 0.000111568 | 0.000334568 |
| Ighv1-34   | 1.857033239 | -3.523450086 | 2.794791702 | -1.260720104 | 0.207409708 | 0.28607571  |
| Mefv       | 24.46465588 | -3.523981132 | 0.708068623 | -4.976892095 | 6.46E-07    | 2.67E-06    |
| Cd24a      | 716.3883505 | -3.526530182 | 0.42303988  | -8.336164855 | 7.67E-17    | 9.31E-16    |
| Gpr88      | 1.816755585 | -3.52661672  | 1.727872887 | -2.041016296 | 0.041249207 | 0.07132013  |
| Kcnj10     | 79.26837991 | -3.526872836 | 0.454751408 | -7.75560619  | 8.79E-15    | 8.81E-14    |
| Oxct1      | 422.409541  | -3.528757474 | 0.43842916  | -8.048637725 | 8.37E-16    | 9.26E-15    |
| Cers1      | 1.858346678 | -3.529101646 | 1.875501406 | -1.881684351 | 0.059878886 | 0.098658089 |
| Tgif2      | 92.14439815 | -3.530293188 | 0.495496006 | -7.124766183 | 1.04E-12    | 8.50E-12    |
| Cfap69     | 82.22588241 | -3.531708914 | 0.407924648 | -8.657748256 | 4.81E-18    | 6.52E-17    |
| Relb       | 250.8194984 | -3.531783774 | 0.282699259 | -12.49307759 | 8.14E-36    | 4.38E-34    |
| Pf4        | 89.61882979 | -3.533569504 | 0.540246543 | -6.540661013 | 6.12E-11    | 4.11E-10    |
| Nck2       | 356.7271867 | -3.533936479 | 0.297926379 | -11.8617777  | 1.87E-32    | 7.95E-31    |
| Hkdc1      | 133.1408891 | -3.535262416 | 0.53623944  | -6.59269377  | 4.32E-11    | 2.94E-10    |
| Cttnbp2nl  | 286.8287762 | -3.53576176  | 0.29239298  | -12.09249879 | 1.16E-33    | 5.39E-32    |
| Slc4a11    | 36.68895729 | -3.537198573 | 0.733452898 | -4.822666301 | 1.42E-06    | 5.60E-06    |
| Ulbp1      | 28.11664936 | -3.538250001 | 0.564390704 | -6.269150038 | 3.63E-10    | 2.22E-09    |
| Pcdhb17    | 13.60929042 | -3.539606138 | 0.866250851 | -4.086121399 | 4.39E-05    | 0.00014033  |
| Gm21399    | 6.914756677 | -3.541008544 | 1.357094666 | -2.609256844 | 0.009073911 | 0.018610687 |
| Ighv1-62-2 | 1.832472498 | -3.541772016 | 1.934858793 | -1.830506716 | 0.067174203 | 0.109127675 |
| Retnlg     | 13.9287618  | -3.542131443 | 0.975270769 | -3.631946694 | 0.000281291 | 0.000785625 |
| Rpl9-ps6   | 1.878472382 | -3.542708173 | 2.225989371 | -1.591520705 | 0.111492439 | 0.169480438 |
| Slc8a1     | 30.84187031 | -3.542789881 | 0.647255418 | -5.473557709 | 4.41E-08    | 2.11E-07    |
| Ano3       | 3.711564882 | -3.543521716 | 2.105763838 | -1.682772613 | 0.092419119 | 0.144348249 |
| Pard6g     | 44.38090048 | -3.543866881 | 0.743333081 | -4.767535538 | 1.86E-06    | 7.24E-06    |
| Spdl1      | 48.67766405 | -3.545162924 | 0.568982608 | -6.230705252 | 4.64E-10    | 2.80E-09    |
| Col3a1     | 3141.227456 | -3.545185467 | 0.35176768  | -10.07820123 | 6.90E-24    | 1.48E-22    |
| Srgap1     | 119.6636261 | -3.545466824 | 0.4672658   | -7.58768741  | 3.26E-14    | 3.10E-13    |
| Ltbp2      | 235.354869  | -3.546577926 | 0.452084797 | -7.844939595 | 4.33E-15    | 4.47E-14    |
| Slc45a1    | 1.906553077 | -3.547745279 | 1.741263708 | -2.037454328 | 0.041604534 | 0.071838539 |
| Iflnr1     | 75.24758374 | -3.547915856 | 0.455976996 | -7.780909756 | 7.20E-15    | 7.28E-14    |
| Elf4       | 255.7237407 | -3.547956839 | 0.310015231 | -11.44445979 | 2.51E-30    | 9.05E-29    |
| Gm5309     | 1.880003369 | -3.548004495 | 1.83878009  | -1.929542589 | 0.053663538 | 0.089665393 |
| Colgalt2   | 128.3895702 | -3.548854693 | 0.423522687 | -8.379373289 | 5.32E-17    | 6.57E-16    |
| Slc35g2    | 17.59630653 | -3.550324453 | 0.921948196 | -3.85089365  | 0.000117688 | 0.000351188 |
| Cd200r3    | 3.949373145 | -3.550686636 | 1.409813002 | -2.518551489 | 0.011783865 | 0.023512563 |
| Chpf       | 236.7381445 | -3.551500052 | 0.312889093 | -11.35066749 | 7.36E-30    | 2.58E-28    |
| Adamts8    | 3.780201409 | -3.55181542  | 1.44347537  | -2.460599947 | 0.013870493 | 0.027133008 |
| Fam43a     | 413.9458358 | -3.552272677 | 0.349354444 | -10.16810504 | 2.75E-24    | 6.11E-23    |
| Erfe       | 3.898893172 | -3.552480006 | 1.486887797 | -2.389205166 | 0.01688487  | 0.032318873 |
| Kcnk13     | 21.35287756 | -3.552568702 | 0.707397908 | -5.022023195 | 5.11E-07    | 2.14E-06    |
| Pgf        | 8.037901973 | -3.553540293 | 1.231641288 | -2.885207185 | 0.003911561 | 0.008704386 |
| Gm6992     | 1.928034146 | -3.554240066 | 1.716237899 | -2.070948362 | 0.038363622 | 0.06689404  |
| Ddit4l     | 151.0991308 | -3.554597429 | 0.387347274 | -9.176771507 | 4.44E-20    | 7.14E-19    |
| Wnt4       | 460.3299987 | -3.555535777 | 0.384994877 | -9.235280741 | 2.58E-20    | 4.22E-19    |
| Dtna       | 60.43233581 | -3.556251421 | 0.460589977 | -7.721078619 | 1.15E-14    | 1.14E-13    |
| Gm6180     | 1.917583945 | -3.55655457  | 1.790736865 | -1.98608441  | 0.047023952 | 0.08008908  |
| C7         | 54.25030411 | -3.557072255 | 0.824613197 | -4.313625187 | 1.61E-05    | 5.49E-05    |
| Kif23      | 108.3485409 | -3.557130918 | 0.720349554 | -4.93806222  | 7.89E-07    | 3.23E-06    |
| Ms4a4c     | 76.44137654 | -3.557182042 | 0.594622962 | -5.982248023 | 2.20E-09    | 1.23E-08    |
| Sh2d1b2    | 1.892334053 | -3.557346437 | 1.599976959 | -2.223373542 | 0.026190622 | 0.047733347 |
| Smpd5      | 27.65199102 | -3.557606442 | 0.596718454 | -5.961951432 | 2.49E-09    | 1.38E-08    |
| Gdpd1      | 101.4586661 | -3.55797275  | 0.377475548 | -9.425703901 | 4.27E-21    | 7.46E-20    |
| Tgtp1      | 1139.928245 | -3.558271377 | 0.420758511 | -8.456801903 | 2.75E-17    | 3.50E-16    |
| Atp1b2     | 70.94124028 | -3.558568117 | 0.627353618 | -5.672348125 | 1.41E-08    | 7.16E-08    |
| Ifi211     | 134.0592233 | -3.558597502 | 0.432658186 | -8.22496284  | 1.95E-16    | 2.28E-15    |
| Il21r      | 71.7661833  | -3.559393797 | 0.472866363 | -7.527272141 | 5.18E-14    | 4.82E-13    |

|               |             |              |             |              |             |             |
|---------------|-------------|--------------|-------------|--------------|-------------|-------------|
| Hmnr          | 151.600139  | -3.560267934 | 0.541202262 | -6.578442446 | 4.75E-11    | 3.23E-10    |
| Tmeff2        | 126.0323663 | -3.561695255 | 0.50427202  | -7.063043581 | 1.63E-12    | 1.30E-11    |
| Mcm6          | 745.5163504 | -3.563380009 | 0.422745326 | -8.42914111  | 3.48E-17    | 4.38E-16    |
| Gm12517       | 1.934236228 | -3.563952178 | 1.703979665 | -2.091546191 | 0.03647913  | 0.063935048 |
| Cdkl3         | 50.88598575 | -3.564546349 | 0.661833444 | -5.38586616  | 7.21E-08    | 3.37E-07    |
| Shcbp1        | 68.46980496 | -3.564780402 | 0.549198601 | -6.490876703 | 8.53E-11    | 5.63E-10    |
| Ccl6          | 238.7418246 | -3.56558482  | 0.315217455 | -11.31150817 | 1.15E-29    | 3.93E-28    |
| Tes           | 322.0861695 | -3.567045631 | 0.292331551 | -12.20205489 | 3.03E-34    | 1.47E-32    |
| Hoxb8         | 3.852089647 | -3.568111138 | 1.448404587 | -2.463476995 | 0.013759673 | 0.026940955 |
| Ramp3         | 25.1533617  | -3.571759144 | 0.651044049 | -5.486201971 | 4.11E-08    | 1.97E-07    |
| Tff2          | 25.98180749 | -3.574987471 | 0.838689534 | -4.26258744  | 2.02E-05    | 6.80E-05    |
| Ercc6l        | 43.20424382 | -3.576708709 | 0.695847224 | -5.140077569 | 2.75E-07    | 1.19E-06    |
| Ccdc80        | 566.7502684 | -3.576950081 | 0.217989568 | -16.40881309 | 1.65E-60    | 4.03E-58    |
| H2-Ab1        | 2581.654052 | -3.577040324 | 0.396524066 | -9.020991745 | 1.86E-19    | 2.83E-18    |
| Plekhg4       | 5.050697819 | -3.57746855  | 1.309127172 | -2.732712778 | 0.006281508 | 0.013350848 |
| Pdpr          | 65.30479414 | -3.577642263 | 0.578907793 | -6.179986357 | 6.41E-10    | 3.81E-09    |
| Cyth4         | 510.1191307 | -3.580473395 | 0.232818986 | -15.37878613 | 2.27E-53    | 3.83E-51    |
| H2bu2         | 3.933463347 | -3.581745247 | 1.495085258 | -2.395679597 | 0.016589585 | 0.031831091 |
| Alms1-ps2     | 4.01762927  | -3.582636045 | 1.762797936 | -2.032357749 | 0.042117452 | 0.072607779 |
| 2810408A11Rik | 34.7371294  | -3.585321904 | 0.691516396 | -5.184724359 | 2.16E-07    | 9.56E-07    |
| Ctnna2        | 15.00779887 | -3.585843281 | 0.880480191 | -4.072599609 | 4.65E-05    | 0.000148091 |
| Lamb2         | 1083.959134 | -3.586155591 | 0.313616694 | -11.4348364  | 2.80E-30    | 1.01E-28    |
| Gpr160        | 25.37531126 | -3.587172501 | 0.658444117 | -5.447952843 | 5.10E-08    | 2.42E-07    |
| Gjb3          | 3.951361345 | -3.588776778 | 1.472428189 | -2.437318713 | 0.014796631 | 0.028750054 |
| P4htm         | 19.08309596 | -3.590770563 | 0.787147932 | -4.561748073 | 5.07E-06    | 1.87E-05    |
| Nts           | 3.949189867 | -3.592621477 | 1.420391714 | -2.5293174   | 0.011428462 | 0.022910681 |
| Sgo1          | 46.82974907 | -3.596448639 | 0.661291411 | -5.438523137 | 5.37E-08    | 2.54E-07    |
| Il1r2         | 16.46587663 | -3.596712232 | 0.918516613 | -3.915783537 | 9.01E-05    | 0.000274569 |
| Lctl          | 1.891656327 | -3.597634517 | 2.364194498 | -1.521716813 | 0.128080053 | 0.190506174 |
| Bub1b         | 138.7377435 | -3.599764651 | 0.571161499 | -6.302533794 | 2.93E-10    | 1.81E-09    |
| Sik1          | 1454.605321 | -3.600825532 | 0.466667878 | -7.716034675 | 1.20E-14    | 1.18E-13    |
| Itgb2         | 351.470453  | -3.601696743 | 0.27517834  | -13.08859102 | 3.83E-39    | 2.60E-37    |
| Ighv1-85      | 1.945780866 | -3.601879963 | 1.874974911 | -1.921028351 | 0.054728133 | 0.09113159  |
| Ncaph         | 121.1703479 | -3.603036592 | 0.490726485 | -7.342250113 | 2.10E-13    | 1.84E-12    |
| Prkar2b       | 67.19781074 | -3.605049353 | 0.640527502 | -5.628250683 | 1.82E-08    | 9.13E-08    |
| Dab1          | 60.66657489 | -3.605451017 | 0.7543451   | -4.779577696 | 1.76E-06    | 6.85E-06    |
| Igkv12-41     | 4.013538697 | -3.607228576 | 1.746409318 | -2.065511527 | 0.038874626 | 0.06769488  |
| B3gnt8        | 56.9744657  | -3.607567119 | 0.362734612 | -9.94547252  | 2.64E-23    | 5.43E-22    |
| Arm3          | 1.918374167 | -3.608364148 | 1.87823252  | -1.921148798 | 0.054712951 | 0.091115209 |
| Lat2          | 105.4983328 | -3.6088675   | 0.432257885 | -8.348876049 | 6.89E-17    | 8.40E-16    |
| Apaf1         | 271.1386539 | -3.609035207 | 0.307293153 | -11.74460013 | 7.53E-32    | 3.04E-30    |
| Spr1a         | 82.77684153 | -3.60969826  | 0.538504176 | -6.703194549 | 2.04E-11    | 1.44E-10    |
| Hcrtr1        | 2.034918284 | -3.610313017 | 1.780223507 | -2.028011091 | 0.042559116 | 0.073280391 |
| Ppp2r2b       | 40.01999466 | -3.612767937 | 0.70415313  | -5.13065665  | 2.89E-07    | 1.25E-06    |
| Csf1          | 1041.409962 | -3.613365153 | 0.302590122 | -11.94145111 | 7.20E-33    | 3.12E-31    |
| Igkv12-38     | 1.957857044 | -3.61422288  | 1.869913961 | -1.932828438 | 0.053257336 | 0.089103805 |
| Gpc2          | 27.36566486 | -3.614240494 | 0.611251666 | -5.912851765 | 3.36E-09    | 1.84E-08    |
| Soat1         | 242.4529972 | -3.614833765 | 0.328833608 | -10.99289633 | 4.13E-28    | 1.24E-26    |
| Rac2          | 359.8918514 | -3.616445209 | 0.44039424  | -8.211835851 | 2.18E-16    | 2.53E-15    |
| H2-DMb1       | 297.2935993 | -3.618349113 | 0.388046754 | -9.324518439 | 1.11E-20    | 1.88E-19    |
| Slit2         | 71.11022809 | -3.621338848 | 0.604405533 | -5.991571303 | 2.08E-09    | 1.16E-08    |
| Arsj          | 3.896463546 | -3.628610873 | 1.847852479 | -1.963690778 | NA          | NA          |
| Birc5         | 297.4916888 | -3.62973742  | 0.432919184 | -8.384330266 | 5.10E-17    | 6.31E-16    |
| Spag6         | 1.993805467 | -3.630957657 | 1.686968341 | -2.152356728 | 0.031369269 | 0.056027585 |
| Rab31         | 412.1730429 | -3.631533276 | 0.276121094 | -13.1519589  | 1.66E-39    | 1.17E-37    |
| Enc1          | 751.3730853 | -3.632017818 | 0.275322861 | -13.19184975 | 9.78E-40    | 7.06E-38    |
| Cd6           | 15.05446069 | -3.636486113 | 0.937698014 | -3.878099409 | 0.000105276 | 0.000317148 |
| Cacna1f       | 2.067249886 | -3.636549147 | 1.766954781 | -2.058088406 | 0.039581648 | 0.068771701 |
| Gm9385        | 1.982673509 | -3.639167603 | 2.206211655 | -1.649509735 | 0.09904325  | 0.15315096  |
| Adra2a        | 2.021425112 | -3.639216069 | 1.723747369 | -2.111223566 | 0.0347531   | 0.061256291 |
| Mmp2          | 338.913711  | -3.640305705 | 0.313221782 | -11.62213457 | 3.18E-31    | 1.23E-29    |
| Mfap2         | 28.17473746 | -3.640544004 | 0.727981574 | -5.000873831 | 5.71E-07    | 2.38E-06    |
| Trgc4         | 3.98179206  | -3.642025547 | 1.46420515  | -2.487373812 | 0.01286901  | 0.025382109 |
| Ighv5-6       | 1.945239456 | -3.642590211 | 2.322684319 | -1.568267449 | 0.116818729 | 0.176381693 |
| Piwil4        | 2.013417483 | -3.643560169 | 1.731628966 | -2.104122904 | 0.035367727 | 0.06216932  |
| Mgat4a        | 127.619942  | -3.644464279 | 0.395034822 | -9.225678537 | 2.82E-20    | 4.60E-19    |

|               |             |              |             |              |             |             |
|---------------|-------------|--------------|-------------|--------------|-------------|-------------|
| Kcns1         | 1.952280784 | -3.644492203 | 1.697679414 | -2.146749365 | 0.03181324  | 0.05676108  |
| H2-Aa         | 3331.628049 | -3.644859489 | 0.350338972 | -10.40380826 | 2.38E-25    | 5.76E-24    |
| Zfp57         | 208.7300446 | -3.645195681 | 0.472118082 | -7.720940634 | 1.15E-14    | 1.14E-13    |
| Cpxm1         | 130.1275271 | -3.645496722 | 0.464612912 | -7.846309533 | 4.28E-15    | 4.42E-14    |
| Olfr1196      | 14.15162252 | -3.645967388 | 0.961713484 | -3.791116012 | 0.000149972 | 0.000440434 |
| Itprpl2       | 503.3736573 | -3.64735748  | 0.245853273 | -14.83550508 | 8.64E-50    | 1.22E-47    |
| Calml4        | 70.10155288 | -3.647438989 | 0.519027065 | -7.027454319 | 2.10E-12    | 1.66E-11    |
| Ppic          | 222.8348051 | -3.647570082 | 0.313848063 | -11.62208889 | 3.18E-31    | 1.23E-29    |
| Pkmyt1        | 212.1358829 | -3.648249478 | 0.386868474 | -9.430206181 | 4.09E-21    | 7.16E-20    |
| Gm43064       | 2.001652329 | -3.648299129 | 2.190069968 | -1.665836791 | 0.095745926 | 0.148781018 |
| Zcchc18       | 1.972561952 | -3.650263237 | 2.289825978 | -1.594122554 | 0.110908588 | 0.168758444 |
| Gab2          | 169.2275579 | -3.650411632 | 0.337128553 | -10.82795153 | 2.54E-27    | 7.14E-26    |
| Adgre1        | 403.7255255 | -3.653540726 | 0.409459859 | -8.922830028 | 4.55E-19    | 6.71E-18    |
| Fmnl1         | 217.1932102 | -3.654315305 | 0.278092921 | -13.14062686 | 1.93E-39    | 1.33E-37    |
| Anxa2         | 1928.645432 | -3.655846165 | 0.237156415 | -15.41533747 | 1.29E-53    | 2.25E-51    |
| Mcpt4         | 1.973579249 | -3.656479474 | 2.263073038 | -1.615714302 | 0.106156097 | 0.162294785 |
| Gm49510       | 7.099112753 | -3.656539161 | 1.775516443 | -2.059422865 | 0.039453747 | 0.068584789 |
| Olfr110       | 2.014585278 | -3.657405971 | 1.813849033 | -2.016378377 | 0.043760425 | 0.075128673 |
| Adamts11      | 97.87047628 | -3.657975428 | 0.454816521 | -8.042749674 | 8.78E-16    | 9.69E-15    |
| Jdp2          | 147.9174936 | -3.658645738 | 0.479521357 | -7.629786841 | 2.35E-14    | 2.26E-13    |
| Gm6206        | 2.036524857 | -3.659475732 | 2.743697669 | -1.333775136 | 0.182277562 | 0.256603458 |
| Fgf7          | 4.082374523 | -3.66293978  | 1.663415228 | -2.202059786 | 0.027661086 | 0.050097332 |
| Fbxo48        | 4.849912495 | -3.663672738 | 1.485802606 | -2.465786992 | 0.013671261 | 0.026783228 |
| Gm5537        | 2.038017083 | -3.665960419 | 3.36494986  | -1.089454694 | 0.275953424 | 0.362913984 |
| Igkv17-121    | 7.41036607  | -3.667514355 | 1.527826361 | -2.400478515 | 0.016373652 | 0.031466353 |
| Apccd1        | 3.999100613 | -3.66926023  | 1.417149299 | -2.589183958 | 0.009620369 | 0.019613495 |
| ccdc198       | 163.1532474 | -3.670137663 | 0.526603847 | -6.969447118 | 3.18E-12    | 2.46E-11    |
| Pclaf         | 94.72339923 | -3.670607473 | 0.648758309 | -5.657896668 | 1.53E-08    | 7.76E-08    |
| Trem1         | 11.48009317 | -3.671434833 | 1.06952939  | -3.432757312 | 0.000597477 | 0.001574066 |
| Fbxo16        | 2.020940535 | -3.672007938 | 1.682411095 | -2.182586615 | 0.029066266 | 0.052303326 |
| Gm2436        | 4.194474812 | -3.672486982 | 1.938503778 | -1.894495654 | 0.058159251 | 0.096187321 |
| Igkv4-61      | 2.088177986 | -3.674608876 | 1.650555595 | -2.226286038 | 0.025995028 | 0.047397138 |
| Ighv1-75      | 4.12653374  | -3.675079285 | 1.547131567 | -2.375414841 | 0.017529237 | 0.033430857 |
| Pigz          | 6.575956928 | -3.675795751 | 1.213993804 | -3.027853798 | 0.002462972 | 0.005715088 |
| Spint1        | 153.4577241 | -3.676729257 | 0.435904323 | -8.434716198 | 3.32E-17    | 4.19E-16    |
| Cenpf         | 97.25901786 | -3.677467983 | 0.678956679 | -5.416351433 | 6.08E-08    | 2.86E-07    |
| Plcl1         | 43.83334028 | -3.679885555 | 0.74425828  | -4.944366295 | 7.64E-07    | 3.14E-06    |
| Actc1         | 7.440715023 | -3.680170873 | 1.172512275 | -3.138705625 | 0.001696958 | 0.004077483 |
| Gm6169        | 2.100818681 | -3.680375939 | 1.663198303 | -2.212830505 | 0.026909333 | 0.048907283 |
| Aloxe3        | 3.964338204 | -3.681237269 | 1.425949055 | -2.581605041 | 0.009834206 | 0.019994459 |
| Sh3bp4        | 339.431662  | -3.681919039 | 0.300047203 | -12.27113269 | 1.29E-34    | 6.41E-33    |
| Ticrr         | 32.73969607 | -3.683264028 | 0.819469235 | -4.494694702 | 6.97E-06    | 2.52E-05    |
| Bmerb1        | 60.44233826 | -3.684976068 | 0.563202053 | -6.542902404 | 6.03E-11    | 4.06E-10    |
| Fcgr1         | 232.612687  | -3.687675611 | 0.335569721 | -10.98929785 | 4.30E-28    | 1.28E-26    |
| Snx20         | 78.3629294  | -3.687943166 | 0.468245241 | -7.87609321  | 3.38E-15    | 3.51E-14    |
| Tlr8          | 48.00714205 | -3.688602368 | 0.669056382 | -5.513141294 | 3.52E-08    | 1.71E-07    |
| Cd244a        | 33.07143435 | -3.68873755  | 0.665828399 | -5.540072423 | 3.02E-08    | 1.48E-07    |
| Ltbp3         | 470.9700323 | -3.689723073 | 0.339550371 | -10.86649697 | 1.66E-27    | 4.72E-26    |
| Sirpb1a       | 30.048139   | -3.6902381   | 0.985761299 | -3.743541266 | 0.000181445 | 0.000524639 |
| Ska1          | 25.01728638 | -3.692103486 | 0.814237221 | -4.534432215 | 5.78E-06    | 2.11E-05    |
| Ccl3          | 11.68363653 | -3.693773285 | 1.112219153 | -3.321084047 | 0.000896685 | 0.002284323 |
| 6-Sep         | 193.4245135 | -3.694037792 | 0.413644211 | -8.930471394 | 4.24E-19    | 6.29E-18    |
| Myot          | 12.00822833 | -3.694892939 | 1.134268456 | -3.257511852 | 0.001123936 | 0.002806629 |
| B3gat1        | 2.098198954 | -3.695397184 | 2.052106601 | -1.80078227  | 0.071737204 | 0.115593182 |
| Grb10         | 778.9891599 | -3.695982396 | 0.405553932 | -9.113417737 | 7.98E-20    | 1.25E-18    |
| Slc41a3       | 131.3804385 | -3.696934469 | 0.45928252  | -8.049368986 | 8.32E-16    | 9.21E-15    |
| Pcdh9         | 6.161518283 | -3.698402475 | 1.340923947 | -2.758100101 | 0.005813839 | 0.01246878  |
| Ighv1-76      | 8.565906583 | -3.702402492 | 1.212335974 | -3.053940964 | 0.002258565 | 0.005283933 |
| Lpcat4        | 186.2953303 | -3.702460597 | 0.596736925 | -6.20451063  | 5.49E-10    | 3.29E-09    |
| Cgref1        | 104.6614979 | -3.706288193 | 0.382992741 | -9.67717609  | 3.77E-22    | 7.11E-21    |
| Timp4         | 10.99831558 | -3.708108521 | 1.638860802 | -2.262613467 | 0.023659527 | 0.043638172 |
| Adrgg6        | 183.9211002 | -3.710890241 | 0.438532181 | -8.46207052  | 2.63E-17    | 3.35E-16    |
| Ltb           | 169.9583294 | -3.711437334 | 0.385997883 | -9.615175364 | 6.90E-22    | 1.28E-20    |
| Tuba1a        | 650.5767819 | -3.71190171  | 0.298965694 | -12.41581152 | 2.15E-35    | 1.13E-33    |
| Ivl           | 2.080914641 | -3.712239754 | 1.662467696 | -2.232969557 | 0.025550952 | 0.046672306 |
| 4930502E18Rik | 2.123112875 | -3.714518207 | 1.645198964 | -2.257792697 | 0.023958587 | 0.044146778 |



|               |             |              |             |              |             |             |
|---------------|-------------|--------------|-------------|--------------|-------------|-------------|
| Clec4a3       | 101.1493653 | -3.714531244 | 0.397994955 | -9.333111376 | 1.03E-20    | 1.74E-19    |
| Top2a         | 365.9217376 | -3.715066125 | 0.447854549 | -8.295251515 | 1.08E-16    | 1.29E-15    |
| Dcca5         | 47.27826537 | -3.715327548 | 0.691322573 | -5.374231499 | 7.69E-08    | 3.58E-07    |
| Gpr65         | 148.3169008 | -3.715482898 | 0.405699556 | -9.158212878 | 5.28E-20    | 8.39E-19    |
| Gm5294        | 2.147036108 | -3.715840059 | 1.942022613 | -1.913386607 | 0.055698578 | 0.092557691 |
| Pdgfrr1       | 37.07608754 | -3.715962841 | 0.549802886 | -6.758718326 | 1.39E-11    | 1.00E-10    |
| Igkv6-32      | 7.573705636 | -3.720509359 | 1.305298553 | -2.850312943 | 0.004367623 | 0.0096213   |
| Pdlim2        | 144.6013954 | -3.72092323  | 0.328758705 | -11.31809796 | 1.07E-29    | 3.67E-28    |
| Jchain        | 333.9931804 | -3.721290801 | 0.481073664 | -7.735386654 | 1.03E-14    | 1.03E-13    |
| Otulinl       | 230.7887866 | -3.722396037 | 0.267509741 | -13.91499248 | 5.14E-44    | 5.03E-42    |
| Slfn10-ps     | 4.296122621 | -3.722704517 | 1.416822295 | -2.62750278  | 0.008601414 | 0.017744059 |
| Vsir          | 435.0365496 | -3.723477354 | 0.302571345 | -12.30611362 | 8.40E-35    | 4.24E-33    |
| Efcab9        | 2.157140862 | -3.723905209 | 1.69899391  | -2.19182964  | 0.02839181  | 0.051273684 |
| Ccl22         | 11.79463337 | -3.724670214 | 1.018607021 | -3.656631201 | 0.000255552 | 0.00071975  |
| Sestd1        | 454.1595366 | -3.725853495 | 0.336345281 | -11.07746622 | 1.61E-28    | 4.97E-27    |
| Cd93          | 507.610251  | -3.725976183 | 0.299413574 | -12.44424606 | 1.50E-35    | 7.93E-34    |
| I830077J02Rik | 81.41250509 | -3.727012243 | 0.441215335 | -8.447150278 | 2.98E-17    | 3.78E-16    |
| Ighv13-2      | 2.110656308 | -3.727306117 | 1.816825505 | -2.051548763 | 0.040213536 | 0.06974874  |
| Capns2        | 2.141334234 | -3.727956566 | 1.88061176  | -1.982310568 | 0.047444492 | 0.080689715 |
| Mgl2          | 54.97476121 | -3.728020456 | 0.672706423 | -5.541823786 | 2.99E-08    | 1.46E-07    |
| P2ry6         | 163.5706621 | -3.729089423 | 0.33694497  | -11.06735448 | 1.81E-28    | 5.54E-27    |
| Slamf8        | 45.42187168 | -3.730036261 | 0.742143203 | -5.02603304  | 5.01E-07    | 2.10E-06    |
| Homer3        | 197.8439674 | -3.730062585 | 0.381896227 | -9.767215071 | 1.56E-22    | 3.02E-21    |
| Crygs         | 4.334428018 | -3.732817536 | 1.921062172 | -1.943100848 | 0.052003975 | 0.087320374 |
| Tgfb3         | 176.9403221 | -3.733720905 | 0.35069953  | -10.64649532 | 1.81E-26    | 4.75E-25    |
| Osm           | 12.04510982 | -3.735900758 | 0.988332585 | -3.78000363  | 0.000156826 | 0.000458825 |
| Gm30232       | 2.099002542 | -3.736773407 | 2.393624482 | -1.561136024 | 0.11849166  | 0.178475533 |
| Flna          | 3111.073609 | -3.736834066 | 0.239009877 | -15.63464283 | 4.23E-55    | 7.67E-53    |
| Psors1c2      | 7.744792898 | -3.737387549 | 1.204022893 | -3.104083461 | 0.001908695 | 0.004530692 |
| Pkia          | 131.7541543 | -3.739387556 | 0.397850162 | -9.398984629 | 5.51E-21    | 9.52E-20    |
| Chst1         | 12.08050146 | -3.742750668 | 0.943311964 | -3.967670092 | 7.26E-05    | 0.000224396 |
| Abcb1a        | 509.3886385 | -3.743224228 | 0.374263418 | -10.00157656 | 1.50E-23    | 3.17E-22    |
| Palm          | 540.8873132 | -3.743588403 | 0.209469018 | -17.87180001 | 1.96E-71    | 9.26E-69    |
| B4galt6       | 351.026001  | -3.744423843 | 0.291845585 | -12.83015413 | 1.11E-37    | 6.94E-36    |
| Kcna6         | 5.372907618 | -3.745782126 | 1.435790901 | -2.608863257 | 0.009084354 | 0.018627623 |
| Dram1         | 62.47333385 | -3.748901825 | 0.479000695 | -7.826506024 | 5.02E-15    | 5.13E-14    |
| Pdk3          | 36.74167518 | -3.751140132 | 0.67055932  | -5.594046673 | 2.22E-08    | 1.10E-07    |
| Gm2897        | 2.117777838 | -3.753321428 | 2.216046347 | -1.693701683 | 0.090321985 | 0.141721969 |
| Cxcl2         | 9.258671739 | -3.754033122 | 1.299433379 | -2.888976981 | 0.003864974 | 0.00861083  |
| Fam217b       | 33.17832143 | -3.757086585 | 0.649274331 | -5.786593443 | 7.18E-09    | 3.78E-08    |
| Dok7          | 4.218666534 | -3.757928216 | 1.428254459 | -2.631133543 | 0.008510059 | 0.017593922 |
| Col4a6        | 33.82782448 | -3.760171562 | 0.728143851 | -5.164050423 | 2.42E-07    | 1.06E-06    |
| Obsl1         | 210.5079042 | -3.761679556 | 0.584703417 | -6.433483106 | 1.25E-10    | 8.06E-10    |
| Gm43951       | 25.68991674 | -3.763097926 | 0.810756304 | -4.641466134 | 3.46E-06    | 1.30E-05    |
| Gm21119       | 2.105150655 | -3.763483467 | 2.036568602 | -1.847953201 | 0.064609113 | 0.10542268  |
| Serpinb6b     | 705.8640497 | -3.766377222 | 0.364305306 | -10.3385187  | 4.72E-25    | 1.12E-23    |
| Col10a1       | 2.106039074 | -3.766568668 | 2.100251817 | -1.793389077 | 0.072910733 | 0.117262469 |
| Lgals3        | 454.4668109 | -3.767182909 | 0.23601181  | -15.96184066 | 2.36E-57    | 4.96E-55    |
| Wnk3          | 4.417023661 | -3.767330113 | 1.415238465 | -2.661975495 | 0.007768353 | 0.016190084 |
| Anln          | 133.7061056 | -3.768904654 | 0.482581465 | -7.809882743 | 5.72E-15    | 5.83E-14    |
| Gm18853       | 12.29028743 | -3.769889105 | 1.016235814 | -3.709659759 | 0.000207538 | 0.000594382 |
| Gdf11         | 7.978087998 | -3.769939545 | 1.160744678 | -3.247862874 | 0.001162753 | 0.002898043 |
| Cdh11         | 29.24361113 | -3.770427784 | 0.678277826 | -5.558825071 | 2.72E-08    | 1.34E-07    |
| Cd177         | 4.3694819   | -3.772057273 | 1.470041741 | -2.565952494 | 0.010289292 | 0.020837468 |
| Neurl1b       | 104.2561182 | -3.772157202 | 0.423064169 | -8.916276725 | 4.82E-19    | 7.11E-18    |
| Trank1        | 29.84194118 | -3.773648923 | 0.697923263 | -5.40696825  | 6.41E-08    | 3.01E-07    |
| Myo1f         | 258.2647096 | -3.773933542 | 0.312257876 | -12.08595148 | 1.25E-33    | 5.82E-32    |
| Vash1         | 35.94947452 | -3.774097494 | 0.678586032 | -5.561708193 | 2.67E-08    | 1.31E-07    |
| Fxyd3         | 160.4313865 | -3.774154103 | 0.472516409 | -7.987350354 | 1.38E-15    | 1.50E-14    |
| Rgs2          | 377.7109707 | -3.778168114 | 0.350955819 | -10.76536677 | 5.02E-27    | 1.38E-25    |
| Tdrd6         | 2.702078683 | -3.781720419 | 2.460908152 | -1.536717417 | 0.124362524 | 0.18592759  |
| Sectm1b       | 2.183058317 | -3.78175641  | 1.820086096 | -2.077789847 | 0.037728719 | 0.065915065 |
| Pimreg        | 33.42351557 | -3.782456903 | 0.750623118 | -5.039089273 | 4.68E-07    | 1.97E-06    |
| Ezr           | 1156.073044 | -3.784704103 | 0.287774096 | -13.15164969 | 1.67E-39    | 1.17E-37    |
| Numb1         | 165.304635  | -3.785599517 | 0.447457843 | -8.460237256 | 2.67E-17    | 3.40E-16    |
| Cd48          | 122.7162631 | -3.785767495 | 0.379998801 | -9.962577477 | 2.22E-23    | 4.61E-22    |

|               |             |              |             |              |             |             |
|---------------|-------------|--------------|-------------|--------------|-------------|-------------|
| Plek          | 247.6386086 | -3.787913034 | 0.320455518 | -11.82040198 | 3.06E-32    | 1.29E-30    |
| Gm14548       | 7.986353818 | -3.790263935 | 1.246260372 | -3.041309843 | 0.002355513 | 0.005492653 |
| ltp3          | 324.6332178 | -3.790980373 | 0.292921818 | -12.94195291 | 2.61E-38    | 1.68E-36    |
| Csf2rb2       | 147.3498128 | -3.791324283 | 0.404414834 | -9.374839814 | 6.93E-21    | 1.19E-19    |
| Ighv7-3       | 2.252693426 | -3.791863868 | 1.853244603 | -2.046067671 | 0.040749713 | 0.070563851 |
| ltga6         | 460.9239362 | -3.792471108 | 0.28613634  | -13.25407009 | 4.27E-40    | 3.20E-38    |
| Lilra6        | 4.682843294 | -3.793872968 | 1.441245484 | -2.632357229 | 0.008479465 | 0.017534925 |
| Gpr183        | 39.22803769 | -3.798717183 | 0.594926451 | -6.385187914 | 1.71E-10    | 1.09E-09    |
| Gramd1b       | 412.684858  | -3.802553208 | 0.3248988   | -11.70380809 | 1.22E-31    | 4.84E-30    |
| Zfp184        | 23.23528295 | -3.803993243 | 0.747705165 | -5.087557797 | 3.63E-07    | 1.55E-06    |
| Trem3         | 4.564328027 | -3.80418264  | 1.492155637 | -2.549454324 | 0.010789164 | 0.021728727 |
| B4galt2       | 73.21830779 | -3.805760354 | 0.502713574 | -7.570434845 | 3.72E-14    | 3.51E-13    |
| Pcdhgb8       | 2.264934318 | -3.806906083 | 1.857309611 | -2.049688464 | 0.040394841 | 0.070014555 |
| Ppp1r26       | 69.74352191 | -3.808707691 | 0.554212177 | -6.872291602 | 6.32E-12    | 4.73E-11    |
| Pkdrej        | 2.296359147 | -3.809361775 | 1.741453053 | -2.187461654 | 0.02870884  | 0.051769441 |
| Ighj1         | 2.209032476 | -3.810569415 | 1.820834427 | -2.092759978 | 0.036370586 | 0.063757918 |
| Ctsk          | 85.64586742 | -3.810845224 | 0.533916367 | -7.137532124 | 9.50E-13    | 7.79E-12    |
| Ywhaq-ps3     | 2.276996245 | -3.812261331 | 2.323303869 | -1.640879345 | 0.100822463 | 0.155465029 |
| Pcdhgb7       | 8.047997674 | -3.812971265 | 1.261690001 | -3.022114197 | 0.002510158 | 0.005813501 |
| Rasl10a       | 13.83248222 | -3.813256494 | 0.939229815 | -4.059982375 | 4.91E-05    | 0.000155744 |
| Fam229a       | 2.262244745 | -3.817391097 | 1.823059099 | -2.093948079 | 0.036264606 | 0.06359175  |
| Sla           | 211.1107755 | -3.818709044 | 0.335042956 | -11.39766999 | 4.29E-30    | 1.53E-28    |
| Evi2a         | 125.8877348 | -3.819039928 | 0.419845332 | -9.096301991 | 9.35E-20    | 1.46E-18    |
| Pdcd1         | 4.540387373 | -3.81921476  | 1.433332862 | -2.664569313 | 0.007708698 | 0.016081483 |
| Ccdc74a       | 5.077399735 | -3.819477999 | 1.422606779 | -2.684844509 | 0.007256356 | 0.015223523 |
| Vangl2        | 126.4142495 | -3.820884883 | 0.348103697 | -10.97628354 | 4.97E-28    | 1.48E-26    |
| Aspm          | 104.6034589 | -3.821200826 | 0.658247277 | -5.805114524 | 6.43E-09    | 3.40E-08    |
| Pax2          | 2.296140588 | -3.821661224 | 1.984061579 | -1.926180752 | 0.054081808 | 0.090275793 |
| Hbegf         | 157.1672322 | -3.82290154  | 0.365757841 | -10.45200159 | 1.43E-25    | 3.53E-24    |
| Dlgap5        | 74.94951815 | -3.825539321 | 0.613110138 | -6.239562985 | 4.39E-10    | 2.65E-09    |
| Arhgef28      | 42.53548943 | -3.826039265 | 0.591628239 | -6.466965259 | 1.00E-10    | 6.53E-10    |
| Tubb3         | 9.961648236 | -3.826531514 | 1.148390425 | -3.332082392 | 0.000861987 | 0.002205156 |
| Cd74          | 7070.367283 | -3.827038354 | 0.308410653 | -12.40890453 | 2.34E-35    | 1.22E-33    |
| Nxpe5         | 18.84580359 | -3.827187303 | 0.796663909 | -4.804017428 | 1.56E-06    | 6.10E-06    |
| Col1a2        | 1883.640057 | -3.829085287 | 0.241312817 | -15.86772445 | 1.06E-56    | 2.18E-54    |
| Kirrel        | 244.1674806 | -3.829756831 | 0.285868062 | -13.39693846 | 6.30E-41    | 5.07E-39    |
| Angpt1        | 117.5166158 | -3.830564095 | 0.425181428 | -9.009246045 | 2.07E-19    | 3.14E-18    |
| Neil3         | 66.90299071 | -3.830571266 | 0.700353881 | -5.469479603 | 4.51E-08    | 2.15E-07    |
| Ccdc68        | 210.5330581 | -3.830612418 | 0.32641666  | -11.73534593 | 8.40E-32    | 3.37E-30    |
| Epb41l1       | 418.2698839 | -3.831054385 | 0.361240329 | -10.60527876 | 2.82E-26    | 7.26E-25    |
| Igkv14-100    | 2.207637418 | -3.831933385 | 1.810493328 | -2.116513397 | 0.034301167 | 0.060572436 |
| 4930438A08Rik | 2.273478524 | -3.833200722 | 2.059282427 | -1.861425452 | 0.062684119 | 0.102664892 |
| Tspo2         | 2.291072324 | -3.837356417 | 1.987664018 | -1.930586046 | 0.053534265 | 0.089493248 |
| Fgd1          | 150.2313943 | -3.841146671 | 0.359943116 | -10.67153809 | 1.38E-26    | 3.66E-25    |
| Pth2r         | 2.220373438 | -3.842221525 | 1.704137431 | -2.254642997 | 0.024155746 | 0.044438023 |
| Gpr173        | 10.6718726  | -3.842778101 | 1.293274791 | -2.971354679 | 0.002964892 | 0.006773716 |
| Ptx3          | 2.290293743 | -3.846989045 | 1.555620542 | -2.472961073 | 0.013399874 | 0.02631203  |
| Krt5          | 2.310544014 | -3.847001686 | 1.787915967 | -2.151668063 | 0.031423507 | 0.0561127   |
| Gm21970       | 2.324296636 | -3.847079673 | 2.310192486 | -1.665263694 | 0.095860158 | 0.148917804 |
| Zc2hc1a       | 158.2988791 | -3.847197164 | 0.333745529 | -11.52733695 | 9.61E-31    | 3.58E-29    |
| Jag1          | 1248.686917 | -3.849746538 | 0.34219289  | -11.25022363 | 2.31E-29    | 7.65E-28    |
| Pdzd7         | 4.301923435 | -3.85101111  | 1.473417308 | -2.613659477 | 0.008957827 | 0.018385869 |
| Xylt1         | 50.64017241 | -3.851388751 | 0.612873214 | -6.284152517 | 3.30E-10    | 2.03E-09    |
| Scd4          | 4.745976875 | -3.85375546  | 1.561290727 | -2.468313809 | 0.013575125 | 0.02661324  |
| Trpv4         | 102.4738891 | -3.856475672 | 0.464363151 | -8.304870148 | 9.99E-17    | 1.20E-15    |
| Ube2c         | 184.8984575 | -3.860664216 | 0.512979852 | -7.525956815 | 5.23E-14    | 4.87E-13    |
| Cd180         | 88.12005866 | -3.860917829 | 0.479922116 | -8.044884168 | 8.63E-16    | 9.53E-15    |
| H60c          | 4.727392072 | -3.861991519 | 1.657431325 | -2.33010651  | 0.019800522 | 0.037245869 |
| Lair1         | 251.5613484 | -3.862915777 | 0.357149894 | -10.81595107 | 2.89E-27    | 8.08E-26    |
| Tlr7          | 123.504797  | -3.863646607 | 0.395244829 | -9.775324872 | 1.44E-22    | 2.81E-21    |
| Capg          | 222.0471509 | -3.863948075 | 0.292279507 | -13.22004446 | 6.72E-40    | 4.94E-38    |
| Chst9         | 2.40765061  | -3.864936579 | 1.683087011 | -2.296337951 | 0.021656566 | 0.040341033 |
| Pcolce        | 1421.240082 | -3.866712472 | 0.290065177 | -13.33049526 | 1.54E-40    | 1.20E-38    |
| Pstpip1       | 64.99162571 | -3.868885108 | 0.464335121 | -8.332096657 | 7.94E-17    | 9.62E-16    |
| A4galt        | 57.47493936 | -3.872522441 | 0.571539437 | -6.775599702 | 1.24E-11    | 8.97E-11    |
| Clec4a1       | 111.3826408 | -3.872542851 | 0.425942177 | -9.091710245 | 9.75E-20    | 1.52E-18    |



|           |             |              |             |              |             |             |
|-----------|-------------|--------------|-------------|--------------|-------------|-------------|
| Ighv4-1   | 2.320951546 | -3.874714678 | 1.585828721 | -2.443337434 | 0.014552124 | 0.028346048 |
| Cspg4     | 16.43675795 | -3.879562733 | 0.845861875 | -4.586520388 | 4.51E-06    | 1.67E-05    |
| Pla2g5    | 28.02046585 | -3.87966851  | 0.878695355 | -4.415260063 | 1.01E-05    | 3.56E-05    |
| Spec1     | 342.9183474 | -3.882746479 | 0.309257409 | -12.55506373 | 3.73E-36    | 2.08E-34    |
| Pmepa1    | 394.5117019 | -3.883332219 | 0.299583905 | -12.96241939 | 2.00E-38    | 1.29E-36    |
| Mrc2      | 226.1395418 | -3.884784918 | 0.317026779 | -12.25380686 | 1.60E-34    | 7.90E-33    |
| Pqlc3     | 82.10084179 | -3.886407665 | 0.440931816 | -8.814078551 | 1.21E-18    | 1.73E-17    |
| Ighv5-4   | 2.326286728 | -3.887720957 | 1.853723237 | -2.097249945 | 0.035971455 | 0.063129645 |
| Prag1     | 120.8037588 | -3.889894269 | 0.468259698 | -8.307130183 | 9.80E-17    | 1.18E-15    |
| Kn1       | 57.78479102 | -3.890517996 | 0.637478241 | -6.102981632 | 1.04E-09    | 6.06E-09    |
| Car13     | 34.13287612 | -3.890669735 | 0.725331823 | -5.363985985 | 8.14E-08    | 3.78E-07    |
| Cryab     | 690.7344302 | -3.893702893 | 0.309571787 | -12.5777059  | 2.80E-36    | 1.58E-34    |
| Csf1r     | 2659.723609 | -3.894154724 | 0.301298574 | -12.92457071 | 3.27E-38    | 2.10E-36    |
| Otp       | 4.651183081 | -3.89522743  | 1.50331991  | -2.59108351  | 0.009567427 | 0.019514896 |
| Ltf       | 6.180744588 | -3.895577469 | 1.615043198 | -2.412057754 | 0.015862769 | 0.030619167 |
| Sirpb1b   | 38.68012152 | -3.896838109 | 0.573501607 | -6.794816377 | 1.08E-11    | 7.92E-11    |
| Ighv3-8   | 2.332896492 | -3.898009847 | 1.80021513  | -2.165302236 | 0.030364547 | 0.054375504 |
| Ifit2     | 392.6214646 | -3.899282341 | 0.305543044 | -12.76181021 | 2.68E-37    | 1.62E-35    |
| Adamts5   | 311.5896185 | -3.900834573 | 0.321153999 | -12.14630547 | 6.00E-34    | 2.84E-32    |
| Clvs2     | 2.466084138 | -3.901836349 | 1.976273973 | -1.974339794 | 0.048343119 | 0.082037974 |
| Olfr558   | 2.340057461 | -3.902147251 | 1.655720837 | -2.356766409 | 0.018434839 | 0.034950749 |
| Kcnab2    | 45.04323554 | -3.90554242  | 0.509805297 | -7.660851008 | 1.85E-14    | 1.79E-13    |
| Tpx2      | 181.0025893 | -3.905990551 | 0.50237045  | -7.775120031 | 7.54E-15    | 7.60E-14    |
| Rhpn1     | 9.859140857 | -3.906502532 | 1.194387946 | -3.270714968 | 0.00107276  | 0.002689076 |
| Fibin     | 71.50478766 | -3.906726378 | 0.749546204 | -5.212122155 | 1.87E-07    | 8.35E-07    |
| Ovol2     | 8.147662225 | -3.907288901 | 1.213302768 | -3.220374175 | 0.001280234 | 0.003163564 |
| Tead2     | 147.6967403 | -3.908593005 | 0.360385975 | -10.84557468 | 2.09E-27    | 5.91E-26    |
| Prdm1     | 39.90835763 | -3.909201281 | 0.633781459 | -6.168058767 | 6.91E-10    | 4.10E-09    |
| Plekhh2   | 281.8156679 | -3.910204587 | 0.420384878 | -9.301487255 | 1.38E-20    | 2.31E-19    |
| Igkv5-39  | 5.288523599 | -3.912124463 | 1.445690553 | -2.706059366 | 0.006808687 | 0.014354996 |
| Pcyt1b    | 79.92615696 | -3.917514055 | 0.517779232 | -7.565993016 | 3.85E-14    | 3.63E-13    |
| Efcab5    | 2.498796064 | -3.918973701 | 1.560024737 | -2.512122795 | 0.012000732 | 0.023883783 |
| Troap     | 51.84106005 | -3.920120683 | 0.669536783 | -5.854974335 | 4.77E-09    | 2.56E-08    |
| Syng4     | 4.71601302  | -3.921441156 | 1.460898575 | -2.684266536 | 0.007268913 | 0.015246116 |
| Dpep2     | 63.51959286 | -3.921696973 | 0.575792395 | -6.810956531 | 9.70E-12    | 7.13E-11    |
| Susd3     | 38.59853716 | -3.922097978 | 0.664924567 | -5.898560793 | 3.67E-09    | 2.00E-08    |
| Prmt2     | 132.0915631 | -3.922852519 | 0.419992092 | -9.340300912 | 9.61E-21    | 1.63E-19    |
| Scnn1b    | 4.628784231 | -3.923013973 | 1.675080343 | -2.341985558 | 0.019181457 | 0.036209222 |
| H2-Eb1    | 2760.191695 | -3.926161263 | 0.367149504 | -10.69363086 | 1.09E-26    | 2.91E-25    |
| Slpi      | 208.1530966 | -3.927080241 | 0.4830119   | -8.130400593 | 4.28E-16    | 4.85E-15    |
| Gpr141    | 23.5766245  | -3.92825597  | 0.737985956 | -5.322941359 | 1.02E-07    | 4.69E-07    |
| Gdnf      | 2.413730887 | -3.931066501 | 1.862121175 | -2.111069115 | 0.034766372 | 0.061269285 |
| Rab11fip5 | 170.6492509 | -3.931392902 | 0.33385791  | -11.77564703 | 5.21E-32    | 2.14E-30    |
| 8-Sep     | 592.3585627 | -3.931522681 | 0.256888388 | -15.30440015 | 7.15E-53    | 1.16E-50    |
| Olrl      | 11.30063749 | -3.932993483 | 1.135187439 | -3.464620333 | 0.000530981 | 0.001412413 |
| Cdkn1a    | 912.326266  | -3.935508441 | 0.352139182 | -11.17600268 | 5.34E-29    | 1.71E-27    |
| Ffar4     | 27.21516872 | -3.935699732 | 0.714650418 | -5.507167745 | 3.65E-08    | 1.76E-07    |
| Clec7a    | 287.0609705 | -3.936712102 | 0.383484398 | -10.26563826 | 1.01E-24    | 2.33E-23    |
| Nkain1    | 5.038173811 | -3.937420246 | 1.612765209 | -2.441409465 | 0.014630056 | 0.028465327 |
| Cmya5     | 8.881526813 | -3.939658193 | 1.243715925 | -3.167651161 | 0.001536758 | 0.003724044 |
| Noxa1     | 13.50814603 | -3.940000682 | 1.09110006  | -3.611035164 | 0.000304977 | 0.000845407 |
| Fbn1      | 399.3160487 | -3.940704307 | 0.284601755 | -13.84638089 | 1.34E-43    | 1.27E-41    |
| Rgs10     | 181.1233614 | -3.943666797 | 0.361221987 | -10.91757131 | 9.50E-28    | 2.78E-26    |
| Pfkfb4    | 115.9664014 | -3.945950733 | 0.337069364 | -11.70664306 | 1.18E-31    | 4.69E-30    |
| Stfa211   | 2.451446595 | -3.946139994 | 1.810439353 | -2.179658759 | 0.029282766 | 0.052637346 |
| Gpc6      | 40.97601817 | -3.947892203 | 0.534144667 | -7.391054235 | 1.46E-13    | 1.29E-12    |
| Ccr8      | 2.495019661 | -3.948200768 | 1.911526002 | -2.065470605 | 0.038878494 | 0.06769488  |
| Grrp1     | 16.15210401 | -3.949081173 | 0.859783683 | -4.593110164 | 4.37E-06    | 1.62E-05    |
| Asxl3     | 49.10582992 | -3.951405502 | 0.706312881 | -5.594412343 | 2.21E-08    | 1.10E-07    |
| Ccdc88c   | 436.6004433 | -3.952275602 | 0.398876317 | -9.908524108 | 3.82E-23    | 7.73E-22    |
| Pik3cg    | 106.8128095 | -3.954680108 | 0.411951204 | -9.599875114 | 8.00E-22    | 1.48E-20    |
| Fam129a   | 453.1163818 | -3.954966217 | 0.324842247 | -12.17503651 | 4.22E-34    | 2.02E-32    |
| Ctss      | 2665.996513 | -3.955106348 | 0.21537386  | -18.3639108  | 2.56E-75    | 1.82E-72    |
| Il27      | 5.067162892 | -3.95776863  | 1.478056018 | -2.677685135 | 0.007413287 | 0.015522683 |
| Nxph3     | 5.062383753 | -3.963765194 | 1.617385632 | -2.450723634 | 0.014256937 | 0.027821916 |
| Fgf23     | 5.097914185 | -3.964632932 | 1.445833988 | -2.742107991 | 0.006104627 | 0.013015467 |

|               |             |              |             |              |             |             |
|---------------|-------------|--------------|-------------|--------------|-------------|-------------|
| Igkv5-43      | 9.45418223  | -3.968777208 | 1.178773678 | -3.366869555 | 0.000760266 | 0.001961117 |
| Wwvtr1        | 3720.754866 | -3.96919491  | 0.273871108 | -14.49293042 | 1.34E-47    | 1.71E-45    |
| Gng2          | 144.4871817 | -3.969943001 | 0.367999886 | -10.78789194 | 3.93E-27    | 1.09E-25    |
| Col4a5        | 464.6996567 | -3.971116293 | 0.329325883 | -12.05831822 | 1.75E-33    | 7.99E-32    |
| Ch25h         | 19.9981017  | -3.971132209 | 0.93149363  | -4.263187724 | 2.02E-05    | 6.79E-05    |
| Cdkn3         | 44.88907403 | -3.972872529 | 0.694825198 | -5.717801453 | 1.08E-08    | 5.57E-08    |
| Plcd3         | 163.8720164 | -3.974130109 | 0.388139505 | -10.23892198 | 1.33E-24    | 3.02E-23    |
| Igkv3-1       | 2.509653115 | -3.9760444   | 2.597549471 | -1.530690539 | 0.125845893 | 0.187733705 |
| Vim           | 2209.171985 | -3.976428977 | 0.292664756 | -13.58697585 | 4.78E-42    | 4.20E-40    |
| Gm6023        | 2.582053946 | -3.977656915 | 1.629216907 | -2.441453252 | 0.014628282 | 0.028465124 |
| Kifc1         | 105.9222388 | -3.978853132 | 0.506669154 | -7.85296105  | 4.06E-15    | 4.21E-14    |
| Lmtk3         | 36.62215845 | -3.982052677 | 0.630896818 | -6.311733653 | 2.76E-10    | 1.71E-09    |
| Src           | 83.31104519 | -3.983309584 | 0.573234539 | -6.948830383 | 3.68E-12    | 2.83E-11    |
| Gpbar1        | 534.9651322 | -3.98379016  | 0.202877357 | -19.63644544 | 7.55E-86    | 1.17E-82    |
| Lrrc1         | 5.101628061 | -3.984213392 | 1.376287135 | -2.894899828 | 0.003792795 | 0.00846662  |
| Aldh18a1      | 127.711018  | -3.986170039 | 0.436948699 | -9.122741529 | 7.32E-20    | 1.16E-18    |
| Exo1          | 151.3256706 | -3.987466602 | 0.434603022 | -9.174962893 | 4.52E-20    | 7.24E-19    |
| Galnt12       | 45.0282128  | -3.990711823 | 1.295991434 | -3.079273302 | 0.002075062 | 0.004889518 |
| Cdc20         | 24.08001081 | -3.991673892 | 0.756488936 | -5.276579344 | 1.32E-07    | 5.96E-07    |
| Kif20a        | 229.0916064 | -3.991751224 | 0.828862035 | -4.815941683 | 1.47E-06    | 5.78E-06    |
| Steap2        | 295.5812917 | -3.99481403  | 0.471345555 | -8.475340404 | 2.34E-17    | 3.00E-16    |
| Cbx6          | 1387.816436 | -3.99698693  | 0.373909328 | -10.68972242 | 1.14E-26    | 3.03E-25    |
| Cep55         | 998.5747518 | -3.997432768 | 0.282516555 | -14.14937533 | 1.88E-45    | 2.06E-43    |
| Adam8         | 43.82939093 | -3.99756964  | 0.754705734 | -5.296858707 | 1.18E-07    | 5.36E-07    |
| 2210017101Rik | 79.36238385 | -3.99838043  | 0.447998977 | -8.924976696 | 4.46E-19    | 6.59E-18    |
| Ighv5-9-1     | 5.0416743   | -4.001251457 | 1.427902577 | -2.802187993 | 0.005075729 | 0.01102306  |
| Crmp1         | 2.477179198 | -4.002043064 | 2.086470316 | -1.9180925   | NA          | NA          |
| Adamts16      | 4.265000096 | -4.004492059 | 1.516963456 | -2.639807863 | 0.008295304 | 0.017172841 |
| Camp          | 30.46471412 | -4.006019485 | 0.907507302 | -4.414311022 | 1.01E-05    | 3.58E-05    |
| Relt          | 2.521065323 | -4.009146352 | 1.939495076 | -2.067108291 | 0.038723951 | 0.067453348 |
| Ighv1-71      | 39.35610152 | -4.010265412 | 0.632869793 | -6.336635835 | 2.35E-10    | 1.47E-09    |
| Smtnl2        | 2.548630661 | -4.010425759 | 1.64820426  | -2.433209193 | 0.014965652 | 0.029035442 |
| Vdr           | 190.3789151 | -4.011587961 | 0.468201423 | -8.56808152  | 1.05E-17    | 1.38E-16    |
| Gzmk          | 9.314146999 | -4.012332943 | 1.128815352 | -3.55446348  | 0.000378751 | 0.001034933 |
| Igkv6-20      | 2.541810578 | -4.013436815 | 1.586904778 | -2.529097442 | 0.011435627 | 0.022919654 |
| Rin1          | 5.195606114 | -4.015044106 | 1.551404286 | -2.588006325 | 0.009653321 | 0.019664215 |
| Gm13680       | 45.38520149 | -4.015104194 | 0.630147866 | -6.371685777 | 1.87E-10    | 1.19E-09    |
| Ighg3         | 2.609922302 | -4.015454999 | 1.815446288 | -2.211828037 | 0.026978549 | 0.049017404 |
| Itgax         | 5.331619311 | -4.017012094 | 1.392684608 | -2.884365973 | 0.003922027 | 0.008724258 |
| Dmc1          | 204.6253817 | -4.017261846 | 0.504111975 | -7.968987137 | 1.60E-15    | 1.72E-14    |
| Tekt5         | 2.758750279 | -4.017679074 | 1.689839322 | -2.377550944 | 0.017428035 | 0.033263899 |
| Elovl7        | 2.588600839 | -4.018672168 | 2.251454833 | -1.784922402 | 0.074273904 | 0.11917379  |
| Glipr2        | 121.1048738 | -4.02083075  | 0.392481173 | -10.24464619 | 1.25E-24    | 2.86E-23    |
| Nos2          | 210.8723981 | -4.021442417 | 0.357301205 | -11.25504856 | 2.19E-29    | 7.28E-28    |
| Igkv1-135     | 16.52759549 | -4.022388335 | 1.037282378 | -3.877814201 | 0.000105399 | 0.000317464 |
| Cep295nl      | 18.41041359 | -4.022396446 | 1.064881399 | -3.777318724 | 0.000158526 | 0.00046332  |
| B3gnt7        | 5.42203464  | -4.023763663 | 1.361316398 | -2.955788726 | 0.003118706 | 0.007091864 |
| Olfml2a       | 13.84415153 | -4.024035751 | 1.059502551 | -3.79804253  | 0.000145843 | 0.000429345 |
| Tnf           | 66.95656292 | -4.026522741 | 0.506199302 | -7.95442176  | 1.80E-15    | 1.93E-14    |
| Erich2        | 14.66130671 | -4.027783691 | 1.029858356 | -3.91100744  | 9.19E-05    | 0.000279756 |
| Mmp12         | 4.750947284 | -4.028520361 | 1.624358853 | -2.480067969 | 0.013135734 | 0.025838006 |
| Cma1          | 195.8720759 | -4.03044861  | 0.80163118  | -5.027809187 | 4.96E-07    | 2.08E-06    |
| Chmp4c        | 2.56671357  | -4.030648526 | 2.000179998 | -2.015142903 | 0.043889678 | 0.075297497 |
| Igkv4-72      | 462.5700732 | -4.032861896 | 0.271331322 | -14.86323753 | 5.71E-50    | 8.18E-48    |
| Timp2         | 5.192110372 | -4.033295138 | 1.625684142 | -2.480983257 | 0.013102053 | 0.025783654 |
| Espl1         | 1661.279001 | -4.0333716   | 0.235046695 | -17.15987373 | 5.30E-66    | 1.77E-63    |
| Cd300ld4      | 128.8510261 | -4.037329011 | 0.684506046 | -5.898164137 | 3.68E-09    | 2.00E-08    |
| Sowaha        | 2.686719477 | -4.037728886 | 1.579482006 | -2.5563627   | 0.01057728  | 0.021337295 |
| Col5a2        | 10.083099   | -4.038276761 | 1.391653722 | -2.901782748 | 0.003710458 | 0.008300208 |
| Ighj3         | 600.4264127 | -4.03861947  | 0.374130699 | -10.79467543 | 3.65E-27    | 1.01E-25    |
| Cldn7         | 2.953168012 | -4.0401062   | 1.664711438 | -2.42691082  | 0.015227999 | 0.029497434 |
| Pls1          | 178.648009  | -4.040801743 | 0.529197077 | -7.635721963 | 2.25E-14    | 2.16E-13    |
| Aunip         | 368.8381811 | -4.047596209 | 0.321376258 | -12.59457136 | 2.26E-36    | 1.29E-34    |
| Rundc3b       | 10.65838783 | -4.048177294 | 1.215558556 | -3.330302169 | 0.000867518 | 0.00221764  |
| Mgat3         | 63.94093153 | -4.049392196 | 0.566178818 | -7.152143573 | 8.54E-13    | 7.04E-12    |
|               | 80.6576472  | -4.049878265 | 0.524422494 | -7.722548735 | 1.14E-14    | 1.13E-13    |

|           |             |              |             |              |             |             |
|-----------|-------------|--------------|-------------|--------------|-------------|-------------|
| Ighv1-58  | 2.65430207  | -4.053457887 | 1.937640882 | -2.091955183 | 0.036442525 | 0.063877459 |
| Nol4l     | 312.3951467 | -4.053590742 | 0.30589975  | -13.25136991 | 4.43E-40    | 3.30E-38    |
| Ighv14-2  | 2.612801787 | -4.058133765 | 1.783703821 | -2.275116371 | 0.02289895  | 0.042428138 |
| Gpr82     | 2.655070219 | -4.060632286 | 1.640993856 | -2.474495728 | 0.013342442 | 0.026217375 |
| Sparc     | 7454.098286 | -4.063890735 | 0.299592852 | -13.56471193 | 6.48E-42    | 5.64E-40    |
| Lpcat2    | 244.8557778 | -4.064198172 | 0.387222151 | -10.49577912 | 9.03E-26    | 2.25E-24    |
| Trim35    | 490.0271887 | -4.064751197 | 0.216132299 | -18.80677349 | 6.65E-79    | 5.96E-76    |
| Ccnjl     | 22.76725615 | -4.065366384 | 0.782332383 | -5.19646952  | 2.03E-07    | 9.03E-07    |
| Sema3c    | 266.7653147 | -4.065716758 | 0.579567635 | -7.015085919 | 2.30E-12    | 1.81E-11    |
| Apol8     | 2.877473062 | -4.067403481 | 1.841818756 | -2.208362505 | 0.027219013 | 0.049417438 |
| Rbp7      | 2.738936095 | -4.07059737  | 1.911364709 | -2.129681139 | 0.033197947 | 0.058880421 |
| Tnfaip3   | 376.3463354 | -4.073361953 | 0.353728438 | -11.515506   | 1.10E-30    | 4.09E-29    |
| Fmo2      | 2122.301426 | -4.073931485 | 0.477261554 | -8.536056279 | 1.39E-17    | 1.81E-16    |
| Klrb1b    | 24.38627938 | -4.076191738 | 0.757616909 | -5.380280841 | 7.44E-08    | 3.47E-07    |
| Dcstamp   | 2.803862111 | -4.089593553 | 1.545600588 | -2.644253506 | 0.008187131 | 0.016971573 |
| Runx1     | 89.10751803 | -4.087492522 | 0.455302973 | -8.977522139 | 2.77E-19    | 4.16E-18    |
| Cav1      | 973.2970985 | -4.087538478 | 0.229770448 | -17.78966142 | 8.50E-71    | 3.92E-68    |
| Abcc5     | 1638.654146 | -4.088313054 | 0.306317376 | -13.34665733 | 1.24E-40    | 9.73E-39    |
| Prom1     | 443.4451227 | -4.088498063 | 0.456916076 | -8.948028482 | 3.62E-19    | 5.39E-18    |
| Rgs18     | 5.468717486 | -4.089593553 | 1.360107433 | -3.00681656  | 0.00263999  | 0.006086079 |
| Enkur     | 14.05019549 | -4.090722691 | 0.94407123  | -4.333065726 | 1.47E-05    | 5.06E-05    |
| Cstdc4    | 2.698934594 | -4.090934491 | 1.760116276 | -2.324241044 | 0.020112579 | 0.037762031 |
| Plscr5    | 2.752646081 | -4.092297521 | 2.220055846 | -1.843330891 | 0.065280713 | 0.106396329 |
| Gapt      | 5.537573441 | -4.093960505 | 1.336253687 | -3.063759932 | 0.002185742 | 0.005131167 |
| Lyz2      | 4572.545907 | -4.094604239 | 0.222801403 | -18.37782073 | 1.98E-75    | 1.47E-72    |
| Dcl1      | 23.76797165 | -4.094732195 | 0.666240283 | -6.146029144 | 7.94E-10    | 4.68E-09    |
| Cd34      | 303.8579013 | -4.095821128 | 0.309166699 | -13.24793756 | 4.64E-40    | 3.44E-38    |
| Gpx3      | 1058.836718 | -4.097788495 | 0.490633773 | -8.352031026 | 6.71E-17    | 8.19E-16    |
| Rhov      | 10.14320328 | -4.100878935 | 1.185282313 | -3.459833062 | 0.00054051  | 0.00143597  |
| Iqgap3    | 137.588263  | -4.103075639 | 0.547815558 | -7.489885201 | 6.89E-14    | 6.32E-13    |
| Ighv1-4   | 2.695675632 | -4.103486388 | 1.853430766 | -2.213994967 | 0.026829125 | 0.048777332 |
| Atp10a    | 136.1998983 | -4.107029391 | 0.388400834 | -10.57420333 | 3.92E-26    | 1.00E-24    |
| Zfp651    | 241.3215822 | -4.107700827 | 0.286221862 | -14.3514573  | 1.04E-46    | 1.24E-44    |
| Cd5       | 9.809857233 | -4.108528852 | 1.23201549  | -3.334802919 | 0.000853599 | 0.002184352 |
| Gm8234    | 2.754960604 | -4.109511874 | 1.723713306 | -2.38410405  | 0.017120761 | 0.032721382 |
| Olfm12b   | 65.21837822 | -4.111172098 | 0.59627102  | -6.894804476 | 5.39E-12    | 4.07E-11    |
| Rflna     | 4.95238314  | -4.112186039 | 1.538919899 | -2.672124807 | 0.007537261 | 0.015760484 |
| Ighv9-1   | 2.744661323 | -4.112461841 | 1.91915177  | -2.142853892 | 0.032124832 | 0.057238826 |
| Hoxb7     | 2.822066041 | -4.11503033  | 1.509208761 | -2.726614394 | 0.006398777 | 0.013576397 |
| Prr15l    | 265.4110041 | -4.119134191 | 0.55568932  | -7.412656751 | 1.24E-13    | 1.10E-12    |
| Cpa3      | 2.758462077 | -4.123749284 | 2.169100142 | -1.901133657 | 0.057284508 | 0.094897519 |
| Smim1012a | 5.549353885 | -4.126891529 | 1.369834861 | -3.012692731 | 0.00258941  | 0.005978086 |
| Nedd9     | 526.3395551 | -4.127077285 | 0.392515781 | -10.51442384 | 7.41E-26    | 1.86E-24    |
| Eda2r     | 72.53887832 | -4.127291165 | 0.54966169  | -7.508784473 | 5.97E-14    | 5.52E-13    |
| Mfge8     | 2265.444209 | -4.127408967 | 0.25191115  | -16.3843838  | 2.47E-60    | 5.94E-58    |
| Cd28      | 34.02798226 | -4.129195239 | 0.724144187 | -5.702172737 | 1.18E-08    | 6.08E-08    |
| Wtip      | 349.0593248 | -4.132071959 | 0.30498309  | -13.5485281  | 8.08E-42    | 6.89E-40    |
| Gsg1      | 2.807842657 | -4.132671695 | 1.479817078 | -2.792690905 | 0.005227161 | 0.011318766 |
| Kcnk16    | 2.806628332 | -4.13441371  | 1.789453183 | -2.310434131 | 0.020864131 | 0.039022678 |
| Rad51ap1  | 46.02962137 | -4.134928006 | 0.716717201 | -5.769260179 | 7.96E-09    | 4.17E-08    |
| Klrg2     | 25.36753091 | -4.135903286 | 0.745897442 | -5.544868574 | 2.94E-08    | 1.44E-07    |
| Slc5a1    | 334.8744365 | -4.136285507 | 0.561601392 | -7.365162492 | 1.77E-13    | 1.56E-12    |
| Gm44503   | 2.831770951 | -4.137693737 | 3.202187885 | -1.292145835 | 0.196306646 | 0.272927393 |
| Fermt1    | 72.720358   | -4.138744042 | 0.696921934 | -5.93860494  | 2.87E-09    | 1.58E-08    |
| Igkv1-110 | 29.95510763 | -4.139602932 | 0.871566714 | -4.749611089 | 2.04E-06    | 7.87E-06    |
| Gfi1      | 5.654700074 | -4.140195114 | 1.400187042 | -2.956887179 | 0.003107618 | 0.007068535 |
| Amd2      | 9.961353486 | -4.142349389 | 1.679243269 | -2.466795292 | 0.013632827 | 0.026714073 |
| Adgrb2    | 7.392733261 | -4.144749508 | 1.437298205 | -2.883708819 | 0.00393022  | 0.008740202 |
| Gpr84     | 5.569591468 | -4.145144861 | 1.368588225 | -3.028774312 | 0.00245548  | 0.005700031 |
| Col11a1   | 2.946455477 | -4.146318718 | 1.608515569 | -2.577729925 | 0.009945169 | 0.020198385 |
| Clcf1     | 638.4034259 | -4.146574139 | 0.274971846 | -15.07999528 | 2.19E-51    | 3.31E-49    |
| Gdf3      | 16.50387137 | -4.150129675 | 1.023821494 | -4.053567638 | 5.04E-05    | 0.000159633 |
| C1qtnf6   | 269.620999  | -4.154204102 | 0.411074616 | -10.1057179  | 5.21E-24    | 1.13E-22    |
| Naip3-ps1 | 2.854833989 | -4.154337168 | 1.819830512 | -2.282815427 | 0.022441243 | 0.041657046 |
| Igkv9-120 | 5.643365062 | -4.156868967 | 1.470284718 | -2.827254419 | 0.004694901 | 0.010266633 |
| Samsn1    | 20.0279026  | -4.156946646 | 1.002360163 | -4.147158673 | 3.37E-05    | 0.000109624 |

|               |             |              |             |              |             |             |
|---------------|-------------|--------------|-------------|--------------|-------------|-------------|
| AL691519.1    | 2.873255365 | -4.157188412 | 2.119027371 | -1.961837996 | 0.049781348 | 0.084049636 |
| Trim59        | 80.58349211 | -4.159332495 | 0.531150077 | -7.830804655 | 4.85E-15    | 4.97E-14    |
| Kazn          | 187.5864164 | -4.160285567 | 0.401064824 | -10.37310011 | 3.29E-25    | 7.86E-24    |
| Ckap2         | 151.1350621 | -4.160711518 | 0.511215711 | -8.138856899 | 3.99E-16    | 4.54E-15    |
| Foxc1         | 25.34471777 | -4.161003771 | 0.881043494 | -4.72281312  | 2.33E-06    | 8.90E-06    |
| Igkv3-7       | 2.831083172 | -4.164587557 | 1.551544815 | -2.684155506 | 0.007271328 | 0.015249304 |
| Igkv15-103    | 10.35383728 | -4.166758453 | 1.21696778  | -3.423885596 | 0.000617326 | 0.001622098 |
| Mmp8          | 10.97864052 | -4.167468663 | 1.270842589 | -3.279295719 | 0.001040665 | 0.002612467 |
| Ccdc190       | 17.48450629 | -4.169289892 | 1.240875719 | -3.359957671 | NA          | NA          |
| Cacnb3        | 122.16899   | -4.16987668  | 0.450466981 | -9.256786534 | 2.11E-20    | 3.48E-19    |
| Sgo2a         | 61.71883696 | -4.171756019 | 0.689836302 | -6.04745794  | 1.47E-09    | 8.38E-09    |
| Cacna1h       | 14.18130055 | -4.172590386 | 1.172002332 | -3.56022362  | 0.000370539 | 0.001013957 |
| Cldn4         | 27.39839323 | -4.174311699 | 0.875679093 | -4.766942287 | 1.87E-06    | 7.26E-06    |
| Pcdhga10      | 10.49099198 | -4.17792546  | 1.23178404  | -3.391767813 | 0.000694433 | 0.001803029 |
| Ighv2-9-1     | 2.861885986 | -4.177956282 | 1.786877867 | -2.338131979 | 0.019380403 | 0.03655644  |
| Asb10         | 2.955572973 | -4.178193661 | 1.609603898 | -2.595789975 | 0.009437373 | 0.01927499  |
| S100a6        | 511.963896  | -4.178388388 | 0.303907931 | -13.74886263 | 5.17E-43    | 4.77E-41    |
| Radx          | 10.05209573 | -4.179073966 | 1.202652685 | -3.47488017  | 0.000511082 | 0.001362671 |
| Slc19a3       | 18.76521859 | -4.180771414 | 0.974862097 | -4.288577254 | 1.80E-05    | 6.10E-05    |
| Rap1gap2      | 73.82100104 | -4.181257163 | 0.526079189 | -7.94796155  | 1.90E-15    | 2.03E-14    |
| Arhgef17      | 645.4140101 | -4.181295819 | 0.305504154 | -13.68654326 | 1.22E-42    | 1.11E-40    |
| Cxcr4         | 168.0808527 | -4.183114932 | 0.379406343 | -11.02542171 | 2.88E-28    | 8.73E-27    |
| Arxes1        | 2.893169486 | -4.186123715 | 2.077708889 | -2.014778749 | 0.043927837 | 0.075355379 |
| Ptpn14        | 517.4218923 | -4.188636182 | 0.375426186 | -11.15701657 | 6.62E-29    | 2.10E-27    |
| Mtcl1         | 188.3817212 | -4.189252491 | 0.489241654 | -8.562746979 | 1.10E-17    | 1.44E-16    |
| Dlg2          | 16.08503286 | -4.189716929 | 0.949611982 | -4.412030393 | 1.02E-05    | 3.61E-05    |
| Ighv1-52      | 2.834523995 | -4.190132429 | 1.640519577 | -2.554149604 | 0.010644751 | 0.021462301 |
| 5330417C22Rik | 356.8398026 | -4.191276499 | 0.370374674 | -11.31631506 | 1.09E-29    | 3.74E-28    |
| Igkv6-17      | 5.840373904 | -4.192413249 | 1.443553026 | -2.904232248 | 0.00368155  | 0.008238784 |
| Ifit1bl1      | 15.90321261 | -4.195802604 | 0.998062402 | -4.203948167 | 2.62E-05    | 8.67E-05    |
| Stambpl1      | 101.8732109 | -4.196898036 | 0.580278881 | -7.232553471 | 4.74E-13    | 4.01E-12    |
| Catsper4      | 2.898659934 | -4.20227897  | 1.480774451 | -2.837892677 | 0.004541245 | 0.009967702 |
| Pak1          | 297.6958569 | -4.203584419 | 0.370511106 | -11.34536684 | 7.82E-30    | 2.73E-28    |
| Cybb          | 1058.429149 | -4.205190587 | 0.282851106 | -14.86715269 | 5.39E-50    | 7.78E-48    |
| Ighj2         | 3.97689952  | -4.205918998 | 1.613301281 | -2.60702638  | 0.009133232 | 0.018703105 |
| Mex3a         | 92.93852813 | -4.207811461 | 0.46320166  | -9.084189085 | 1.04E-19    | 1.62E-18    |
| Grip1         | 35.09850785 | -4.211207131 | 0.773175473 | -5.446638282 | 5.13E-08    | 2.43E-07    |
| C3ar1         | 294.5108329 | -4.212560111 | 0.259592544 | -16.22758512 | 3.22E-59    | 7.22E-57    |
| Flrt3         | 136.1206622 | -4.214280999 | 0.513482271 | -8.207257071 | 2.26E-16    | 2.63E-15    |
| Ano7          | 7.537709962 | -4.216140629 | 1.208222201 | -3.489540768 | 0.000483851 | 0.001296761 |
| Ar14c         | 321.4422766 | -4.219744023 | 0.332235927 | -12.7010467  | 5.83E-37    | 3.44E-35    |
| Olfrr60       | 2.916529364 | -4.22048934  | 1.681594658 | -2.509813718 | 0.012079487 | 0.024017255 |
| Dync2li1      | 200.0430964 | -4.221239514 | 0.358551488 | -11.77303582 | 5.38E-32    | 2.20E-30    |
| Icam5         | 6.164255121 | -4.223804739 | 1.407388444 | -3.001164857 | 0.002689489 | 0.006188475 |
| Igf2bp1       | 201.8588348 | -4.225083468 | 0.567960796 | -7.439040689 | 1.01E-13    | 9.17E-13    |
| Nlrp1c-ps     | 10.90077754 | -4.225914201 | 1.167449974 | -3.619781828 | 0.000294852 | 0.000820005 |
| Lenep         | 2.985931528 | -4.231864834 | 2.534092559 | -1.66997248  | 0.094924809 | 0.147733991 |
| Il7           | 73.81477619 | -4.232298068 | 0.50647532  | -8.35637572  | 6.47E-17    | 7.91E-16    |
| Ubash3a       | 5.397547208 | -4.233017762 | 1.397084375 | -3.029894141 | 0.002446395 | 0.005681261 |
| Foxc2         | 6.113408543 | -4.234337354 | 1.337816589 | -3.165110515 | 0.001550241 | 0.003755115 |
| Ighv1-39      | 2.99247651  | -4.234394418 | 1.868847902 | -2.265777976 | 0.02346498  | 0.043340302 |
| Pla2g7        | 377.042924  | -4.234643979 | 0.358100899 | -11.82528163 | 2.89E-32    | 1.22E-30    |
| Pygb          | 674.209626  | -4.23850772  | 0.194418284 | -21.80097282 | 2.27E-105   | 6.45E-102   |
| Ighv1-19      | 5.909043899 | -4.241799752 | 1.421408814 | -2.984222209 | 0.002843002 | 0.006514449 |
| Slc6a19       | 10.39886521 | -4.242053463 | 1.155886187 | -3.669957745 | 0.000242591 | 0.000686307 |
| Pcdh19        | 5.407115722 | -4.242206167 | 1.535243325 | -2.763214207 | 0.005723519 | 0.012293632 |
| Thsd7a        | 68.94548993 | -4.242530532 | 0.634168648 | -6.689908983 | 2.23E-11    | 1.57E-10    |
| Elf3          | 280.9365631 | -4.242980772 | 0.29926712  | -14.1779049  | 1.26E-45    | 1.42E-43    |
| Cyp4f18       | 142.5005722 | -4.245436593 | 0.443565297 | -9.571164886 | 1.06E-21    | 1.94E-20    |
| Kank4         | 16.24902878 | -4.24601234  | 1.329376438 | -3.193987961 | 0.00140322  | 0.003437082 |
| Smim3         | 111.2828233 | -4.247433706 | 0.400799714 | -10.59739705 | 3.06E-26    | 7.88E-25    |
| Ccdc120       | 310.4930804 | -4.24792588  | 0.358503941 | -11.84903537 | 2.18E-32    | 9.23E-31    |
| Parvg         | 105.7466915 | -4.249267687 | 0.457563764 | -9.286722459 | 1.59E-20    | 2.65E-19    |
| Fsd2          | 3.079850908 | -4.251119825 | 1.490647494 | -2.851861249 | 0.004346407 | 0.009584471 |
| Rgs1          | 121.6560224 | -4.252502149 | 0.708532582 | -6.001844177 | 1.95E-09    | 1.09E-08    |
| Klc3          | 72.78997054 | -4.254973732 | 0.520145904 | -8.180346513 | 2.83E-16    | 3.26E-15    |

|               |             |              |             |              |             |             |
|---------------|-------------|--------------|-------------|--------------|-------------|-------------|
| Bex2          | 16.99299396 | -4.257145218 | 1.197900873 | -3.553837646 | 0.000379654 | 0.001036949 |
| Mybphl        | 3.025451578 | -4.260488856 | 2.11216719  | -2.017117241 | 0.04368328  | 0.075018893 |
| Ccna2         | 237.9681391 | -4.265048197 | 0.522743185 | -8.158974273 | 3.38E-16    | 3.86E-15    |
| Ybx2          | 7.448322059 | -4.265392945 | 1.363748986 | -3.127696511 | 0.00176182  | 0.004216102 |
| Gpm6b         | 112.3236132 | -4.266933874 | 0.513995497 | -8.301500501 | 1.03E-16    | 1.23E-15    |
| Igkv4-53      | 5.822515343 | -4.268035309 | 1.378189679 | -3.09684173  | 0.001955943 | 0.004631238 |
| Ncapg         | 75.40946733 | -4.2696732   | 0.70418739  | -6.06326279  | 1.33E-09    | 7.65E-09    |
| Clec4a2       | 153.4997328 | -4.271541851 | 0.360525545 | -11.84809762 | 2.20E-32    | 9.31E-31    |
| Map3k9        | 10.74779211 | -4.271894984 | 1.125892364 | -3.794230354 | 0.000148102 | 0.000435318 |
| Rab33a        | 6.074042877 | -4.27681817  | 1.406823473 | -3.040053178 | 0.002365364 | 0.005511854 |
| Dlk1          | 3.181089094 | -4.277787347 | 1.798520761 | -2.378503179 | 0.017383087 | 0.033181824 |
| Pbk           | 77.78677644 | -4.277824013 | 0.664926868 | -6.433525574 | 1.25E-10    | 8.06E-10    |
| Thbs1         | 314.3908948 | -4.279591455 | 0.458968282 | -9.324372993 | 1.12E-20    | 1.88E-19    |
| Tlr13         | 147.791157  | -4.281944582 | 0.391523009 | -10.93663586 | 7.70E-28    | 2.27E-26    |
| Hnf4g         | 6.182830981 | -4.282255346 | 1.426421911 | -3.002095883 | 0.002681277 | 0.006171245 |
| LT629149.6    | 3.139880721 | -4.283081759 | 3.162209741 | -1.354458467 | 0.175590155 | 0.248688292 |
| Anxa3         | 903.8578097 | -4.287587373 | 0.318927618 | -13.44376321 | 3.35E-41    | 2.76E-39    |
| Igf1r         | 546.1504105 | -4.288081824 | 0.500095257 | -8.574530082 | 9.95E-18    | 1.31E-16    |
| Vsig10        | 400.4936156 | -4.289109511 | 0.342156671 | -12.53551332 | 4.77E-36    | 2.62E-34    |
| Col1a1        | 1590.728183 | -4.290465174 | 0.288886783 | -14.85171849 | 6.78E-50    | 9.63E-48    |
| Ighv1-78      | 3.105088125 | -4.302939377 | 2.180412876 | -1.973451645 | 0.048444129 | 0.082184845 |
| Ighv6-6       | 6.188963493 | -4.303527223 | 1.531275679 | -2.810419628 | 0.004947694 | 0.010766951 |
| Ppfia4        | 155.9585605 | -4.3047543   | 0.443118087 | -9.714688766 | 2.61E-22    | 4.98E-21    |
| Gm13655       | 3.17843398  | -4.304817858 | 1.830652148 | -2.351521485 | 0.01869681  | 0.035392318 |
| Fcgr3         | 531.7620656 | -4.305490763 | 0.284637001 | -15.12625113 | 1.09E-51    | 1.68E-49    |
| Samd14        | 99.01152919 | -4.305496422 | 0.454430158 | -9.474495365 | 2.68E-21    | 4.76E-20    |
| Ighv1-20      | 3.143541736 | -4.306710689 | 2.148668404 | -2.004362646 | 0.045031228 | 0.077041726 |
| Sele          | 6.375919578 | -4.309459371 | 1.56438566  | -2.754729528 | 0.005874067 | 0.01257738  |
| Gm15931       | 6.506374885 | -4.312278484 | 1.353167923 | -3.186802177 | 0.001438551 | 0.00351454  |
| Rgcc          | 17.11847604 | -4.313717084 | 0.979027318 | -4.40612535  | 1.05E-05    | 3.70E-05    |
| Tmem171       | 57.66988366 | -4.315568764 | 0.538236443 | -8.017979502 | 1.07E-15    | 1.18E-14    |
| Ighv1-74      | 3.165083012 | -4.316512354 | 1.752685688 | -2.462798883 | 0.013785722 | 0.026988859 |
| Crisp2        | 3.156456087 | -4.31751588  | 1.465195543 | -2.946716499 | 0.003211675 | 0.00728675  |
| Ttc9          | 6.569594118 | -4.318307861 | 1.404964247 | -3.073606941 | 0.002114879 | 0.004979209 |
| Tmigd1        | 3.146863477 | -4.320086564 | 1.822015384 | -2.371048346 | 0.017737711 | 0.033794422 |
| Bcl2a1a       | 29.22084888 | -4.320345469 | 0.841556426 | -5.13375614  | 2.84E-07    | 1.23E-06    |
| Fut9          | 3.276365963 | -4.320519866 | 2.265090139 | -1.90743838  | 0.056463843 | 0.093674153 |
| Cd209a        | 10.90649644 | -4.321482029 | 1.218426793 | -3.546771996 | 0.000389982 | 0.001062216 |
| S100a11       | 1695.383819 | -4.322132598 | 0.213406285 | -20.25307079 | 3.34E-91    | 7.11E-88    |
| Epdrl         | 111.0546158 | -4.325314484 | 0.469893033 | -9.204891705 | 3.42E-20    | 5.54E-19    |
| Ccnb2         | 190.5144557 | -4.329469427 | 0.534404932 | -8.101477297 | 5.43E-16    | 6.09E-15    |
| Fhl3          | 81.02083488 | -4.331007267 | 0.493268071 | -8.780230314 | 1.63E-18    | 2.30E-17    |
| Plk1          | 129.1826477 | -4.33367292  | 0.560593282 | -7.730511693 | 1.07E-14    | 1.06E-13    |
| Ighv5-16      | 3.23986525  | -4.333798691 | 1.78468701  | -2.42832422  | 0.015168776 | 0.02939942  |
| Sycn          | 3.138068264 | -4.33658778  | 1.626289438 | -2.666553491 | 0.007663341 | 0.01599665  |
| Dppa3         | 3.198449008 | -4.343736169 | 1.478436968 | -2.938059763 | 0.003302734 | 0.007475438 |
| Lamc2         | 261.5123381 | -4.343772952 | 0.386644602 | -11.23453665 | 2.76E-29    | 9.01E-28    |
| Pcdhb4        | 3.27685408  | -4.345678032 | 1.576595751 | -2.756367972 | 0.00584472  | 0.012528705 |
| Tnfrsf13b     | 48.23753427 | -4.346177769 | 0.599902215 | -7.244810336 | 4.33E-13    | 3.67E-12    |
| AI854703      | 5.989321918 | -4.348555111 | 1.49959316  | -2.899823251 | 0.003733731 | 0.008346794 |
| Epn3          | 84.1415676  | -4.354334975 | 0.749980253 | -5.805932834 | 6.40E-09    | 3.39E-08    |
| Kdelr3        | 53.87355512 | -4.354689996 | 0.555545107 | -7.83858942  | 4.56E-15    | 4.68E-14    |
| Tmem229a      | 239.7382759 | -4.355677217 | 0.38630878  | -11.27511837 | 1.74E-29    | 5.87E-28    |
| Cdc25c        | 37.0645503  | -4.357747529 | 0.709914386 | -6.138412763 | 8.34E-10    | 4.90E-09    |
| E230025N22Rik | 3.279511014 | -4.35860218  | 1.478999375 | -2.946993931 | 0.003208795 | 0.007282154 |
| Miir1         | 55.03847711 | -4.359529563 | 0.557382402 | -7.821433813 | 5.22E-15    | 5.34E-14    |
| Dynlt1-ps1    | 3.352119391 | -4.366124695 | 2.598907251 | -1.679984806 | 0.092960272 | 0.145082616 |
| Ighv1-26      | 17.8901305  | -4.36615817  | 0.978230916 | -4.463320569 | 8.07E-06    | 2.88E-05    |
| Ctsj          | 3.353108283 | -4.366844047 | 1.813539411 | -2.407912406 | 0.01604403  | 0.03092353  |
| Gm2237        | 3.318713434 | -4.368795608 | 1.714546117 | -2.548077049 | 0.010831854 | 0.021804399 |
| Kcng2         | 21.72507878 | -4.369454774 | 1.087483786 | -4.017949352 | 5.87E-05    | 0.000183909 |
| Hydin         | 25.63991748 | -4.370647342 | 0.957448359 | -4.564890945 | 5.00E-06    | 1.84E-05    |
| Gm10705       | 3.358864148 | -4.370998558 | 1.877324322 | -2.328312965 | 0.019895491 | 0.03739975  |
| Slc4a3        | 381.3299607 | -4.372429093 | 0.384826026 | -11.36209299 | 6.46E-30    | 2.28E-28    |
| Erich4        | 24.50760954 | -4.373681323 | 0.978407661 | -4.470203473 | 7.81E-06    | 2.80E-05    |
| Igkv6-14      | 6.589078593 | -4.374817016 | 1.66787098  | -2.622994865 | 0.008716059 | 0.01795042  |



|               |             |              |             |              |             |             |
|---------------|-------------|--------------|-------------|--------------|-------------|-------------|
| Cd16311       | 5.957181811 | -4.37650013  | 1.792353641 | -2.441761508 | 0.014615799 | 0.028444079 |
| Il1b          | 98.61425723 | -4.378118428 | 0.629094109 | -6.959401402 | 3.42E-12    | 2.63E-11    |
| Rasa1         | 103.9259665 | -4.378309321 | 0.682259233 | -6.417369102 | 1.39E-10    | 8.92E-10    |
| Slc25a24      | 446.1175664 | -4.379469833 | 0.302307772 | -14.48679207 | 1.47E-47    | 1.85E-45    |
| C5ar1         | 113.3225509 | -4.380175026 | 0.516735438 | -8.47662983  | 2.32E-17    | 2.97E-16    |
| Ace           | 279.1735555 | -4.38057901  | 0.3985212   | -10.99208527 | 4.17E-28    | 1.25E-26    |
| Finc          | 67.60802597 | -4.385191981 | 0.641177904 | -6.839274953 | 7.96E-12    | 5.90E-11    |
| Slc24a3       | 111.2081188 | -4.385913292 | 0.49539694  | -8.853331423 | 8.49E-19    | 1.23E-17    |
| Slc25a4       | 1351.124909 | -4.386871778 | 0.239987269 | -18.27960207 | 1.20E-74    | 8.20E-72    |
| Pla2g4c       | 7.427876566 | -4.387998696 | 1.359199221 | -3.22837052  | 0.001244976 | 0.003083224 |
| Cdk1          | 344.8226404 | -4.388826193 | 0.493212213 | -8.898454013 | 5.66E-19    | 8.27E-18    |
| Fam163a       | 25.47009415 | -4.390143229 | 1.011827514 | -4.338825707 | 1.43E-05    | 4.94E-05    |
| Mpp2          | 39.14659131 | -4.401999696 | 0.785285313 | -5.605605536 | 2.08E-08    | 1.04E-07    |
| Sparcl1       | 1042.055188 | -4.404715041 | 0.26490957  | -16.62724017 | 4.43E-62    | 1.16E-59    |
| Vill          | 413.0040168 | -4.406509042 | 0.445203918 | -9.897731944 | 4.26E-23    | 8.55E-22    |
| Gm1604b       | 3.317704806 | -4.409897727 | 1.99467343  | -2.210836953 | 0.02704713  | 0.049121069 |
| Greb1l        | 153.7403275 | -4.412399148 | 0.47058212  | -9.376470037 | 6.82E-21    | 1.17E-19    |
| Trim15        | 3.499617882 | -4.416321907 | 1.587459013 | -2.782006887 | 0.005402389 | 0.011668559 |
| Fam83d        | 91.60478573 | -4.420875327 | 0.456634055 | -9.681440274 | 3.62E-22    | 6.83E-21    |
| Slc35f2       | 176.4911525 | -4.423074848 | 0.368440266 | -12.00486283 | 3.35E-33    | 1.49E-31    |
| Ptpn13        | 340.4953093 | -4.426554111 | 0.423422538 | -10.45422412 | 1.40E-25    | 3.45E-24    |
| Dzip1l        | 289.8937132 | -4.427418085 | 0.333367774 | -13.28088205 | 2.99E-40    | 2.27E-38    |
| Ighv1-66      | 3.441258736 | -4.429705715 | 1.581420273 | -2.80109329  | 0.005092979 | 0.011054891 |
| Rps26-ps1     | 3.48146057  | -4.431319709 | 1.803866935 | -2.456566848 | 0.01402717  | 0.02741433  |
| Panx1         | 77.19005068 | -4.436506659 | 0.45463546  | -9.758382374 | 1.70E-22    | 3.28E-21    |
| Parpbp        | 46.01230043 | -4.43723848  | 0.65708277  | -6.752936893 | 1.45E-11    | 1.04E-10    |
| Erich5        | 23.82009165 | -4.444266257 | 1.28725886  | -3.452503917 | 0.000555409 | 0.001472111 |
| Prune2        | 37.90018165 | -4.44664533  | 0.745919933 | -5.96129039  | 2.50E-09    | 1.39E-08    |
| Eps8l3        | 12.36248928 | -4.449060545 | 1.206136851 | -3.688686355 | 0.000225415 | 0.000641137 |
| Frmpd1        | 6.924058883 | -4.449269739 | 1.373201801 | -3.240069838 | 0.001195004 | 0.002970175 |
| Slc29a4       | 3.855797905 | -4.450610586 | 1.498020267 | -2.970994908 | 0.002968367 | 0.006779839 |
| Slc9a5        | 163.8740215 | -4.450698897 | 0.418807294 | -10.62708067 | 2.23E-26    | 5.81E-25    |
| Mapk13        | 138.1563839 | -4.450714291 | 0.970873953 | -4.584234931 | 4.56E-06    | 1.69E-05    |
| Plat          | 208.8271577 | -4.455598576 | 0.318561059 | -13.98663913 | 1.88E-44    | 1.92E-42    |
| Ubd           | 170.7378138 | -4.4557993   | 0.538774508 | -8.270248939 | 1.34E-16    | 1.58E-15    |
| A530032D15Rik | 3.534760467 | -4.457370514 | 1.467515945 | -3.037357468 | 0.002386622 | 0.005556075 |
| Gm5340        | 13.58648421 | -4.45983198  | 1.121208072 | -3.977702349 | 6.96E-05    | 0.000215686 |
| Gad1          | 3.809714201 | -4.46253438  | 1.562049637 | -2.856845438 | 0.004278741 | 0.009452376 |
| Igkv8-24      | 7.060970687 | -4.462602842 | 1.404770773 | -3.17674807  | 0.001489364 | 0.003619998 |
| Mmp7          | 117.9337533 | -4.46544518  | 0.601567577 | -7.423015054 | 1.14E-13    | 1.03E-12    |
| Gpx2          | 55.25001006 | -4.475615915 | 0.741096158 | -6.039183806 | 1.55E-09    | 8.80E-09    |
| Gprc5a        | 64.83900201 | -4.47801226  | 0.553909844 | -8.084370241 | 6.25E-16    | 6.97E-15    |
| Ms4a6d        | 188.6896278 | -4.478732015 | 0.403002574 | -11.11340795 | 1.08E-28    | 3.37E-27    |
| Epb41l4a      | 132.3806244 | -4.486806177 | 0.514846693 | -8.714839266 | 2.91E-18    | 4.01E-17    |
| Bhlhe22       | 3.64456915  | -4.487182045 | 1.502362005 | -2.986751548 | 0.002819588 | 0.006463683 |
| Wnt7b         | 46.5797279  | -4.487416309 | 0.709317583 | -6.326385268 | 2.51E-10    | 1.57E-09    |
| Ifitm7        | 22.31491616 | -4.489143925 | 1.024208554 | -4.383036939 | 1.17E-05    | 4.09E-05    |
| Bub1          | 70.23333902 | -4.489993598 | 0.703321588 | -6.383983765 | 1.73E-10    | 1.10E-09    |
| Mbp           | 193.94199   | -4.493922507 | 0.35146043  | -12.78642524 | 1.95E-37    | 1.19E-35    |
| 4933415A04Rik | 3.614777219 | -4.49594883  | 1.475248215 | -3.04758805  | 0.002306859 | 0.005385093 |
| Oip5          | 36.96581257 | -4.496492607 | 0.753756116 | -5.965447592 | 2.44E-09    | 1.35E-08    |
| Tubb2b        | 234.0715379 | -4.496651013 | 0.386127329 | -11.64551348 | 2.42E-31    | 9.44E-30    |
| Ighv1-69      | 3.535983043 | -4.499806134 | 1.702638529 | -2.642842892 | 0.008221317 | 0.017031915 |
| Myo5a         | 246.8068172 | -4.501209323 | 0.472044933 | -9.535552674 | 1.49E-21    | 2.70E-20    |
| Adam5         | 3.539123091 | -4.50489228  | 1.748709459 | -2.576123928 | 0.009991483 | 0.020285197 |
| Fhl2          | 71.99691496 | -4.509266716 | 0.541282627 | -8.330706531 | 8.04E-17    | 9.72E-16    |
| Ighv2-5       | 3.633265007 | -4.509781413 | 1.806606532 | -2.496272063 | 0.01255063  | 0.024851309 |
| Pmp22         | 567.0371038 | -4.512635635 | 0.383049289 | -11.78082237 | 4.90E-32    | 2.02E-30    |
| Cltn          | 53.66168503 | -4.513269162 | 0.87274521  | -5.171347958 | 2.32E-07    | 1.02E-06    |
| Slc6a20b      | 88.17567974 | -4.521003903 | 0.565681636 | -7.992134826 | 1.33E-15    | 1.44E-14    |
| Scn5a         | 3.684128786 | -4.526071065 | 1.757855697 | -2.574768266 | 0.010030727 | 0.020355175 |
| Ighv14-4      | 3.701926676 | -4.526612327 | 1.526264244 | -2.965811684 | 0.003018853 | 0.006881727 |
| Myo15b        | 538.8318703 | -4.527431525 | 0.449604774 | -10.06980306 | 7.51E-24    | 1.61E-22    |
| Phlda3        | 244.8964956 | -4.527720014 | 0.324762113 | -13.94165094 | 3.54E-44    | 3.51E-42    |
| Igkv4-91      | 7.351531565 | -4.529124451 | 1.546125649 | -2.929337894 | 0.003396849 | 0.00766584  |
| Add2          | 3.898089174 | -4.53173025  | 1.787720078 | -2.534921605 | 0.011247249 | 0.022563322 |

|               |             |              |             |              |             |             |
|---------------|-------------|--------------|-------------|--------------|-------------|-------------|
| Alox12e       | 7.357886459 | -4.534907606 | 1.73368922  | -2.615755785 | 0.008903021 | 0.018282185 |
| Lmcd1         | 155.0514465 | -4.535597719 | 0.651361567 | -6.963256579 | 3.32E-12    | 2.57E-11    |
| Ighv10-1      | 7.480360548 | -4.536994734 | 1.607689912 | -2.822058346 | 0.00477165  | 0.01041176  |
| Gm49394       | 3.749907724 | -4.542012486 | 3.08784459  | -1.470932993 | NA          | NA          |
| Nfatc2        | 116.9977107 | -4.542319258 | 0.433448221 | -10.47949683 | 1.07E-25    | 2.67E-24    |
| Ankrd66       | 3.751927221 | -4.546597431 | 1.518347846 | -2.994437304 | 0.002749516 | 0.006315514 |
| Ighv14-3      | 3.650046761 | -4.556011261 | 1.777046954 | -2.563810287 | 0.010353012 | 0.020954309 |
| Zfp365        | 17.61137121 | -4.556519691 | 1.103505361 | -4.129132356 | 3.64E-05    | 0.000118018 |
| Pagr1b        | 3.771336175 | -4.560465106 | 2.041061055 | -2.234359965 | 0.025459398 | 0.04654307  |
| Neb1          | 168.7571362 | -4.560562209 | 0.910575944 | -5.008436954 | 5.49E-07    | 2.29E-06    |
| 1700084M14Rik | 3.851414408 | -4.565299415 | 1.65745822  | -2.754397885 | 0.005880024 | 0.012588552 |
| Igkc          | 1459.051348 | -4.565566739 | 0.488770718 | -9.340917067 | 9.55E-21    | 1.62E-19    |
| Ighv1-50      | 3.788564509 | -4.570166505 | 1.472108483 | -3.104503885 | 0.001905984 | 0.004525518 |
| Fxyd6         | 185.9959038 | -4.573144398 | 0.621928788 | -7.353164038 | 1.94E-13    | 1.70E-12    |
| Tg            | 4.000954657 | -4.579880781 | 1.502647643 | -3.047874065 | 0.002304665 | 0.005382182 |
| St3gal2       | 284.0499436 | -4.580611162 | 0.314848237 | -14.54863208 | 5.96E-48    | 7.75E-46    |
| Sv2a          | 6.596634038 | -4.581407794 | 1.345353824 | -3.405355315 | 0.00066078  | 0.001723265 |
| Dnah9         | 3.913310709 | -4.582503555 | 1.949084652 | -2.351105453 | 0.018717728 | 0.035427982 |
| Scube1        | 90.4235579  | -4.586688209 | 0.50784538  | -9.031662767 | 1.69E-19    | 2.57E-18    |
| Large2        | 161.0911458 | -4.586834859 | 0.579459713 | -7.915709673 | 2.46E-15    | 2.59E-14    |
| Apobec3       | 875.4659781 | -4.587635129 | 0.324736689 | -14.12724613 | 2.58E-45    | 2.78E-43    |
| Racgap1       | 228.2839157 | -4.591239675 | 0.528283214 | -8.690867999 | 3.60E-18    | 4.91E-17    |
| Evp1          | 110.3829953 | -4.591311703 | 0.521348232 | -8.806612208 | 1.29E-18    | 1.83E-17    |
| F2rl1         | 222.2801352 | -4.59429763  | 0.452686312 | -10.1489652  | 3.35E-24    | 7.41E-23    |
| Dapp1         | 206.7774828 | -4.595153439 | 0.324181573 | -14.17462872 | 1.32E-45    | 1.48E-43    |
| 9030612E09Rik | 3.844433139 | -4.596506289 | 1.484581792 | -3.096162376 | 0.00196043  | 0.004639929 |
| Basp1         | 281.0612578 | -4.599340927 | 0.457248216 | -10.05874002 | 8.41E-24    | 1.80E-22    |
| Igkv3-5       | 3.836532613 | -4.600334468 | 1.794730015 | -2.563245965 | 0.010369856 | 0.020983418 |
| Gpr176        | 29.2930775  | -4.608643462 | 0.783955312 | -5.878706851 | 4.13E-09    | 2.24E-08    |
| Naalad1       | 7.647475264 | -4.618439068 | 1.535459902 | -3.007853908 | 0.002630996 | 0.006067805 |
| Pappa         | 7.889774075 | -4.61854196  | 1.448236735 | -3.189079416 | 0.001427267 | 0.003489966 |
| Adora2b       | 3.976657823 | -4.619019227 | 1.422955559 | -3.246074128 | 0.001170084 | 0.002914184 |
| Uhrf1         | 240.6148386 | -4.619097716 | 0.612748807 | -7.538321844 | 4.76E-14    | 4.45E-13    |
| Uchl1         | 15.65078304 | -4.621197332 | 1.166904    | -3.960220662 | 7.49E-05    | 0.00023096  |
| Sgpp2         | 97.23911794 | -4.621399634 | 0.733147852 | -6.303502927 | NA          | NA          |
| Col8a1        | 117.5787647 | -4.622118955 | 0.53715132  | -8.604873121 | 7.64E-18    | 1.02E-16    |
| Guca2b        | 3.945618609 | -4.624220222 | 1.611598931 | -2.869336864 | 0.004113335 | 0.009116501 |
| Unc5b         | 638.6594284 | -4.627945295 | 0.343398873 | -13.4768797  | 2.14E-41    | 1.78E-39    |
| Kif18b        | 52.07743128 | -4.628077688 | 0.725750274 | -6.376956171 | 1.81E-10    | 1.15E-09    |
| Mki67         | 652.8772916 | -4.628870755 | 0.442670051 | -10.4567064  | 1.37E-25    | 3.37E-24    |
| Neur1a        | 65.79601857 | -4.635199771 | 0.557211169 | -8.318569387 | 8.90E-17    | 1.07E-15    |
| Sfrp4         | 21.44157871 | -4.639056363 | 0.91295421  | -5.081368061 | 3.75E-07    | 1.60E-06    |
| Tagln2        | 3587.893007 | -4.644526678 | 0.25515991  | -18.20241539 | 4.94E-74    | 3.01E-71    |
| Ccn5          | 88.73850335 | -4.647145269 | 0.52329261  | -8.880586459 | 6.65E-19    | 9.67E-18    |
| Ciita         | 132.6298053 | -4.648041968 | 0.582836131 | -7.974869302 | 1.53E-15    | 1.65E-14    |
| Gm29639       | 14.07536167 | -4.648596423 | 1.363747157 | -3.40869376  | 0.000652747 | 0.001705969 |
| Kcnj9         | 7.788442402 | -4.64955501  | 1.386306926 | -3.353914579 | 0.00079677  | 0.00204599  |
| Ly6c1         | 89.76991891 | -4.650108649 | 0.520030852 | -8.941986091 | 3.82E-19    | 5.69E-18    |
| Ccdc112       | 36.24761148 | -4.655028922 | 0.767316323 | -6.066636123 | 1.31E-09    | 7.51E-09    |
| Cfap70        | 7.669052807 | -4.656789073 | 1.427987677 | -3.261084916 | 0.001109868 | 0.002775565 |
| Cxcl5         | 14.29315998 | -4.656983083 | 1.276752369 | -3.64752257  | 0.000264781 | 0.000743655 |
| Figl1         | 61.9219426  | -4.65763424  | 0.72734002  | -6.403654569 | 1.52E-10    | 9.72E-10    |
| Megf10        | 3.979465005 | -4.659053137 | 1.44531782  | -3.223549223 | 0.001266125 | 0.003131878 |
| Ighv1-7       | 3.986263895 | -4.659465454 | 1.490835791 | -3.125404879 | 0.001775605 | 0.004246705 |
| Mmp13         | 48.82795572 | -4.661913045 | 0.920219246 | -5.066089482 | 4.06E-07    | 1.72E-06    |
| Mpo           | 3.491553595 | -4.663377708 | 1.692301496 | -2.755642372 | 0.005857701 | 0.012551795 |
| Slc7a9        | 3.956686037 | -4.665058467 | 1.82664456  | -2.553895032 | 0.010652537 | 0.021473861 |
| Lce6a         | 28.16150948 | -4.666323466 | 0.985386893 | -4.735524189 | 2.18E-06    | 8.40E-06    |
| Gprc5b        | 118.2907409 | -4.667528729 | 0.441993456 | -10.5601761  | 4.56E-26    | 1.16E-24    |
| Tacstd2       | 8.095592304 | -4.669018681 | 1.416413291 | -3.296367459 | 0.000979438 | 0.002474065 |
| AA986860      | 477.8641991 | -4.66928081  | 0.732861332 | -6.371301922 | 1.87E-10    | 1.19E-09    |
| Sybu          | 72.82095981 | -4.671674564 | 0.589810539 | -7.920635964 | 2.36E-15    | 2.50E-14    |
| Tnfsf9        | 4.114746309 | -4.672429341 | 1.424804012 | -3.279348811 | 0.001040469 | 0.00261236  |
| Igkv4-74      | 4.026595911 | -4.67275994  | 1.487218728 | -3.141945331 | 0.001678294 | 0.004034342 |
| Vcan          | 39.62819118 | -4.673283334 | 0.796488781 | -5.867356135 | 4.43E-09    | 2.39E-08    |
| Ebf3          | 75.41913848 | -4.679911871 | 0.756231221 | -6.188466888 | 6.08E-10    | 3.62E-09    |



|           |             |              |             |              |             |             |
|-----------|-------------|--------------|-------------|--------------|-------------|-------------|
| Chst11    | 45.03278348 | -4.681195516 | 0.652784857 | -7.171115363 | 7.44E-13    | 6.18E-12    |
| Arhgap44  | 354.7027368 | -4.685268101 | 0.297667001 | -15.73996475 | 8.05E-56    | 1.52E-53    |
| Gm20521   | 4.167066247 | -4.688333237 | 1.7404119   | -2.6938067   | 0.007064112 | 0.014860437 |
| P1ch1     | 32.82363077 | -4.689050002 | 0.864861415 | -5.421735692 | 5.90E-08    | 2.78E-07    |
| Dusp18    | 14.70724023 | -4.692643359 | 1.146393657 | -4.093396129 | 4.25E-05    | 0.000136301 |
| St8sia6   | 8.178319371 | -4.696111409 | 1.381765757 | -3.39863062  | 0.000677241 | 0.00176215  |
| Nid1      | 2755.269084 | -4.699718981 | 0.297636265 | -15.79014229 | 3.64E-56    | 7.05E-54    |
| Igkv4-68  | 4.111146439 | -4.702420786 | 2.130263355 | -2.20743636  | 0.027283589 | 0.049503888 |
| Sis       | 4.185705875 | -4.705152428 | 3.54151135  | -1.32857189  | NA          | NA          |
| Hpgds     | 199.4201986 | -4.707639982 | 0.436319362 | -10.78943635 | 3.86E-27    | 1.07E-25    |
| Igkv5-48  | 8.199739625 | -4.710333573 | 1.411744332 | -3.336534432 | 0.000848299 | 0.002171442 |
| Tmem119   | 214.8957861 | -4.711058368 | 0.345918848 | -13.61896987 | 3.09E-42    | 2.77E-40    |
| Fam71f2   | 8.564721498 | -4.712313437 | 1.373550858 | -3.43075279  | 0.000601909 | 0.001583785 |
| BC034090  | 179.9408115 | -4.717258532 | 0.539452103 | -8.744536365 | 2.24E-18    | 3.12E-17    |
| Igkv2-109 | 4.141420363 | -4.718559852 | 1.565277161 | -3.014520347 | 0.002573859 | 0.005947297 |
| Iglv3     | 4.180315123 | -4.722452651 | 2.049425351 | -2.304281367 | 0.021206854 | 0.039592803 |
| Gm2274    | 4.227320127 | -4.731135631 | 2.104751546 | -2.247835684 | 0.02458667  | 0.045176046 |
| Chd5      | 4.301429093 | -4.731421123 | 1.474775141 | -3.208232219 | 0.001335536 | 0.003288779 |
| Mxd3      | 43.87618529 | -4.73613508  | 0.791386609 | -5.984603515 | 2.17E-09    | 1.21E-08    |
| Ighv1-80  | 4.252544323 | -4.736480811 | 1.612440143 | -2.937461481 | 0.003309113 | 0.007487889 |
| Pabpc1l   | 8.360892272 | -4.736688778 | 1.334125995 | -3.550405881 | 0.000384638 | 0.001049504 |
| Osbpl3    | 1292.714279 | -4.737016823 | 0.303740538 | -15.59560293 | 7.80E-55    | 1.40E-52    |
| Fads3     | 1153.187704 | -4.741110322 | 0.273178087 | -17.35538297 | 1.80E-67    | 6.66E-65    |
| Tspan8    | 566.3167166 | -4.741893095 | 0.544143318 | -8.714419418 | 2.92E-18    | 4.02E-17    |
| Igkv6-15  | 15.49744653 | -4.743430744 | 1.197142806 | -3.962293154 | 7.42E-05    | 0.000229138 |
| Dusp9     | 66.43048463 | -4.749112282 | 1.137534312 | -4.174917832 | 2.98E-05    | 9.78E-05    |
| Duxbl2    | 4.103319457 | -4.749210356 | 1.922561941 | -2.470250895 | 0.013501832 | 0.026481734 |
| Nuggc     | 4.254008932 | -4.755645572 | 1.429881935 | -3.32590087  | 0.000881333 | 0.00225093  |
| Nat8l     | 4.322086696 | -4.757595674 | 1.418708981 | -3.353468357 | 0.000798055 | 0.002048983 |
| Syt15     | 31.14114991 | -4.767363576 | 0.838451721 | -5.685913043 | 1.30E-08    | 6.64E-08    |
| Igkv13-84 | 4.372071587 | -4.775766729 | 1.643970512 | -2.905019704 | 0.0036723   | 0.008219163 |
| Slamf9    | 128.5777624 | -4.780157438 | 0.520977146 | -9.175368784 | 4.50E-20    | 7.22E-19    |
| Dab2      | 3408.431495 | -4.783304593 | 0.315821715 | -15.14558488 | 8.10E-52    | 1.27E-49    |
| Ncs1      | 55.3728136  | -4.791997593 | 0.627927232 | -7.631453689 | 2.32E-14    | 2.23E-13    |
| Tpbg      | 4.416233067 | -4.792272445 | 1.70995707  | -2.802568866 | 0.005069739 | 0.011011455 |
| Fam177a   | 207.4795527 | -4.793684874 | 1.3377082   | -3.583505636 | 0.000339013 | 0.000932328 |
| Igkv3-2   | 4.319615573 | -4.79401416  | 1.609766941 | -2.978079646 | 0.002900606 | 0.00663663  |
| Esm1      | 157.8812963 | -4.797769032 | 0.480922979 | -9.976169253 | 1.94E-23    | 4.04E-22    |
| Gm14276   | 16.21654213 | -4.802984575 | 1.095951822 | -4.382477839 | 1.17E-05    | 4.09E-05    |
| Fkbp1b    | 36.27077488 | -4.804204413 | 0.892390903 | -5.383520157 | 7.30E-08    | 3.41E-07    |
| Aldh1a2   | 129.2526905 | -4.811112067 | 0.561893798 | -8.562315655 | 1.11E-17    | 1.45E-16    |
| Nlrp1a    | 8.953551283 | -4.813068327 | 1.317841564 | -3.652235943 | 0.000259967 | 0.000731359 |
| Adamts4   | 43.86783394 | -4.820751829 | 0.756903408 | -6.369044953 | 1.90E-10    | 1.21E-09    |
| Hrh2      | 16.35103345 | -4.821384887 | 1.113934177 | -4.328249358 | 1.50E-05    | 5.16E-05    |
| Gm9923    | 4.541899243 | -4.821940985 | 3.540914198 | -1.361778545 | 0.173267784 | 0.245827995 |
| Hmgb1-ps8 | 4.519951796 | -4.82342773  | 1.50372411  | -3.207654715 | 0.001338221 | 0.003293963 |
| Prph      | 54.17981314 | -4.826032494 | 0.946112928 | -5.100905347 | 3.38E-07    | 1.45E-06    |
| Misp      | 208.4171943 | -4.829791119 | 0.370324856 | -13.04203873 | 7.05E-39    | 4.70E-37    |
| Ighv10-3  | 4.607382239 | -4.835660077 | 1.461867526 | -3.307864762 | 0.000940102 | 0.002384594 |
| Itga2     | 72.52381159 | -4.837205936 | 0.559893175 | -8.639515808 | 5.65E-18    | 7.61E-17    |
| Ccr2      | 510.5598901 | -4.855733899 | 0.369283951 | -13.14905205 | 1.72E-39    | 1.20E-37    |
| Pdgfb     | 505.2317224 | -4.857962323 | 0.326175856 | -14.89369074 | 3.62E-50    | 5.28E-48    |
| Igkv3-12  | 4.646271401 | -4.862388535 | 1.545636722 | -3.145880572 | 0.001655876 | 0.003988522 |
| Col6a5    | 108.3789034 | -4.862777255 | 0.508095639 | -9.570594361 | 1.06E-21    | 1.95E-20    |
| Wnt10a    | 9.126812002 | -4.868818532 | 1.548030841 | -3.145168948 | 0.001659909 | 0.003995493 |
| Runx3     | 101.911385  | -4.869637956 | 0.590782181 | -8.242696055 | 1.68E-16    | 1.97E-15    |
| Mapk8ip1  | 507.4951197 | -4.875118879 | 0.401631099 | -12.13830029 | 6.62E-34    | 3.13E-32    |
| Adm2      | 4.795393637 | -4.876435475 | 1.486764021 | -3.279898764 | 0.001038443 | 0.002608041 |
| Rgma      | 76.03140219 | -4.879527089 | 0.679483751 | -7.18122704  | 6.91E-13    | 5.77E-12    |
| Igkv12-46 | 16.90568992 | -4.891116537 | 1.191756865 | -4.104122813 | 4.06E-05    | 0.000130448 |
| Itgam     | 406.6572347 | -4.894336441 | 0.317490658 | -15.41568646 | 1.28E-53    | 2.25E-51    |
| Rtn4r     | 4.840099489 | -4.895322055 | 1.544197681 | -3.170139494 | 0.001523658 | 0.003694399 |
| Tnfsf8    | 17.22568275 | -4.896054225 | 1.107742072 | -4.419850386 | 9.88E-06    | 3.49E-05    |
| Cldn6     | 228.4252966 | -4.897498112 | 1.307047905 | -3.746992053 | 0.000178968 | 0.000518092 |
| Nrg1      | 232.3746113 | -4.898558077 | 0.421242463 | -11.62883257 | 2.94E-31    | 1.14E-29    |
| Lamc3     | 795.0772822 | -4.902788428 | 0.339274317 | -14.45080922 | 2.48E-47    | 3.04E-45    |

|               |             |              |             |              |             |             |
|---------------|-------------|--------------|-------------|--------------|-------------|-------------|
| Plac9a        | 9.532073333 | -4.910823914 | 1.364225206 | -3.599716448 | 0.000318564 | 0.000880637 |
| Cftr          | 97.02412952 | -4.914624395 | 0.557987494 | -8.807767994 | 1.28E-18    | 1.82E-17    |
| Diaph3        | 45.89571021 | -4.915468818 | 0.807784221 | -6.085126063 | 1.16E-09    | 6.73E-09    |
| Hif3a         | 122.9421612 | -4.917221278 | 1.311639675 | -3.748911665 | 0.000177604 | 0.000514755 |
| Slc36a2       | 4.789105423 | -4.917677966 | 2.008792124 | -2.448077084 | 0.014362093 | 0.027995078 |
| Spp1          | 35792.50186 | -4.920586984 | 0.378922241 | -12.98574338 | 1.47E-38    | 9.59E-37    |
| Plppr3        | 32.82365932 | -4.922432883 | 0.84518838  | -5.824065973 | 5.74E-09    | 3.05E-08    |
| Ighv1-22      | 4.794335388 | -4.923508165 | 1.400968534 | -3.514360278 | 0.000440815 | 0.001188519 |
| Vash2         | 9.434583078 | -4.925108409 | 1.332154823 | -3.69709911  | 0.000218077 | 0.000622535 |
| Myo5c         | 346.3158116 | -4.929984405 | 0.49813367  | -9.896910606 | 4.29E-23    | 8.61E-22    |
| Peg3          | 8514.146658 | -4.932773309 | 0.341675761 | -14.43700104 | 3.03E-47    | 3.66E-45    |
| Gpr31b        | 9.717282487 | -4.932895284 | 1.364197946 | -3.61596739  | 0.000299228 | 0.000831092 |
| Tnfrsf18      | 10.12199267 | -4.939035962 | 1.338971201 | -3.688679756 | 0.000225421 | 0.000641137 |
| Gad1-ps       | 4.963507427 | -4.9391476   | 1.432665002 | -3.447524434 | 0.000565749 | 0.001497887 |
| Shisa4        | 98.87950197 | -4.942435772 | 0.624881853 | -7.909392392 | 2.59E-15    | 2.72E-14    |
| Ttll10        | 71.41330239 | -4.945093637 | 0.556176132 | -8.891236707 | 6.04E-19    | 8.81E-18    |
| Pde6c         | 287.4795369 | -4.945237139 | 0.834399639 | -5.926700957 | 3.09E-09    | 1.70E-08    |
| Rnf138rt1     | 9.860561805 | -4.945294925 | 1.433926569 | -3.448778362 | 0.000563129 | 0.001491412 |
| Fohl1         | 39.44687997 | -4.94806943  | 0.775082589 | -6.383925401 | 1.73E-10    | 1.10E-09    |
| Slc23a3       | 78.53395684 | -4.948625505 | 0.670986002 | -7.37515461  | 1.64E-13    | 1.45E-12    |
| Ina           | 18.7985111  | -4.949769041 | 1.375417501 | -3.598739317 | 0.000319764 | 0.000883522 |
| Dnah1         | 37.26838809 | -4.949790127 | 0.874178317 | -5.662220202 | 1.49E-08    | 7.57E-08    |
| Hspb2         | 41.81260481 | -4.951994182 | 0.747689253 | -6.623064548 | 3.52E-11    | 2.42E-10    |
| Calca         | 5.058452533 | -4.953007886 | 2.076408524 | -2.385372545 | 0.017061833 | 0.032616073 |
| Kcna3         | 5.025741173 | -4.959138606 | 1.528987826 | -3.243412748 | 0.00118107  | 0.00293854  |
| Itgbl1        | 92.54948159 | -4.969823603 | 0.679266282 | -7.316458556 | 2.55E-13    | 2.21E-12    |
| Ighv1-82      | 4.958229174 | -4.970492353 | 1.705286081 | -2.914755716 | 0.003559671 | 0.007988056 |
| Ccn4          | 274.2729246 | -4.976286667 | 0.522528494 | -9.523474269 | 1.67E-21    | 3.02E-20    |
| Dnah2         | 19.90013151 | -4.978150897 | 1.14483434  | -4.348359168 | 1.37E-05    | 4.74E-05    |
| Vil1          | 168.0274344 | -4.978426736 | 1.195085064 | -4.165750947 | 3.10E-05    | 0.000101564 |
| Gm10424       | 5.038098679 | -4.983541966 | 3.540337397 | -1.407646054 | NA          | NA          |
| Emp1          | 766.3233877 | -4.984503865 | 0.276747143 | -18.01104001 | 1.60E-72    | 8.25E-70    |
| Tagap         | 85.73409421 | -4.984952756 | 0.57927536  | -8.605497664 | 7.60E-18    | 1.01E-16    |
| 5830411N06Rik | 5.1968372   | -4.985999538 | 1.501160725 | -3.321429514 | 0.000895576 | 0.002281838 |
| Trim61        | 5.186594007 | -4.989149145 | 1.515249077 | -3.29262642  | 0.000992563 | 0.002504619 |
| Ckap2l        | 136.7267191 | -4.990260185 | 0.594829675 | -8.389393463 | 4.89E-17    | 6.05E-16    |
| Abcc4         | 698.0642655 | -4.991098333 | 0.422422254 | -11.8154247  | 3.25E-32    | 1.36E-30    |
| Acod1         | 4.967914427 | -4.993317924 | 1.505940798 | -3.315746496 | 0.000913987 | 0.002324232 |
| Ighv1-18      | 5.09624464  | -4.994493628 | 1.608481941 | -3.105097733 | 0.001902162 | 0.00451833  |
| Prtg          | 39.65472965 | -4.997947776 | 0.859638155 | -5.814013427 | 6.10E-09    | 3.23E-08    |
| Nrip2         | 123.232528  | -4.999876541 | 0.581237133 | -8.602128564 | 7.83E-18    | 1.04E-16    |
| Adrg1         | 927.0538553 | -4.999948514 | 0.30453493  | -16.41730807 | 1.44E-60    | 3.55E-58    |
| Glis3         | 420.4592704 | -5.004671331 | 0.415401338 | -12.04779781 | 1.99E-33    | 9.01E-32    |
| Sftpd         | 224.4261504 | -5.011242692 | 0.513027757 | -9.767975764 | 1.55E-22    | 3.00E-21    |
| Gm6851        | 5.158557883 | -5.013779827 | 3.540024119 | -1.416312336 | 0.156684078 | 0.226004751 |
| Igkv14-111    | 19.48497818 | -5.015810157 | 1.325194816 | -3.784960593 | 0.000153733 | 0.000450316 |
| Lrr1          | 8.9052857   | -5.017966337 | 1.429261643 | -3.510880155 | 0.000446626 | 0.001202855 |
| Tnfrsf9       | 9.766223871 | -5.023479009 | 1.33439758  | -3.764604407 | 0.000166813 | 0.000486291 |
| Nrk           | 15.38540658 | -5.024729892 | 1.382068147 | -3.635660009 | 0.00027727  | 0.000775664 |
| Melk          | 43.75154632 | -5.033279046 | 0.809269435 | -6.219534345 | 4.99E-10    | 3.00E-09    |
| Steap1        | 55.85275458 | -5.037731825 | 0.79745475  | -6.317263552 | 2.66E-10    | 1.66E-09    |
| Tmem178       | 56.71700427 | -5.040293688 | 0.687478466 | -7.331565911 | 2.27E-13    | 1.98E-12    |
| Fam107a       | 284.1658243 | -5.042050648 | 1.030864687 | -4.891088725 | 1.00E-06    | 4.05E-06    |
| Pcdhb9        | 10.40012639 | -5.042312546 | 1.286440519 | -3.919584677 | 8.87E-05    | 0.000270662 |
| Sdk1          | 50.05614523 | -5.050451964 | 0.800603434 | -6.308306649 | 2.82E-10    | 1.75E-09    |
| Cd63          | 1484.115957 | -5.055205302 | 0.208884361 | -24.20097545 | 2.17E-129   | 9.26E-126   |
| GpnmB         | 187.1410706 | -5.056506435 | 0.68904946  | -7.3383795   | 2.16E-13    | 1.89E-12    |
| Ms4a6b        | 254.0246568 | -5.05878061  | 0.348722243 | -14.50460404 | 1.13E-47    | 1.45E-45    |
| Gm609         | 389.3845046 | -5.061237817 | 0.516984949 | -9.789913279 | 1.24E-22    | 2.45E-21    |
| Iglv2         | 5.272160587 | -5.061953847 | 1.471329455 | -3.440394556 | 0.000580867 | 0.001535765 |
| Tgfb2         | 409.8036963 | -5.062803476 | 0.441274123 | -11.47314836 | 1.80E-30    | 6.60E-29    |
| Esxn          | 97.97599031 | -5.064635121 | 0.553101365 | -9.156793749 | 5.35E-20    | 8.49E-19    |
| Nxpe3         | 118.6343538 | -5.065055202 | 0.693343164 | -7.305264498 | 2.77E-13    | 2.39E-12    |
| Gm6565        | 5.491686917 | -5.075053597 | 3.539648492 | -1.433773328 | 0.151636959 | 0.219934224 |
| Depdc1a       | 35.44874192 | -5.080314916 | 1.013049756 | -5.014872061 | 5.31E-07    | 2.22E-06    |
| Rp1           | 10.37533274 | -5.084332118 | 1.440805922 | -3.52881123  | 0.000417431 | 0.001131737 |

|               |             |              |             |              |             |             |
|---------------|-------------|--------------|-------------|--------------|-------------|-------------|
| C1ql3         | 29.10017317 | -5.085999427 | 0.916296986 | -5.550601501 | 2.85E-08    | 1.40E-07    |
| Ntf5          | 5.379072317 | -5.093453308 | 1.472522748 | -3.458998046 | 0.000542189 | 0.001439756 |
| Ptprh         | 16.91964235 | -5.096793198 | 1.262144974 | -4.038199495 | 5.39E-05    | 0.000169765 |
| Ighv8-12      | 5.388932539 | -5.097698846 | 1.403765659 | -3.631445758 | 0.000281838 | 0.000786894 |
| Sctr          | 67.69611251 | -5.10012531  | 0.696770119 | -7.319667094 | 2.49E-13    | 2.16E-12    |
| Chrnbl        | 350.4304648 | -5.106841993 | 0.366294178 | -13.94191419 | 3.52E-44    | 3.51E-42    |
| Sh3pxd2b      | 381.855673  | -5.110753638 | 0.319668883 | -15.98764819 | 1.56E-57    | 3.32E-55    |
| Igdcc4        | 350.2796293 | -5.111438144 | 0.469199354 | -10.89395819 | 1.23E-27    | 3.55E-26    |
| Foxm1         | 174.4821721 | -5.114765885 | 0.506350929 | -10.10122742 | 5.46E-24    | 1.18E-22    |
| Fbxw18        | 5.595201337 | -5.122889627 | 1.632908031 | -3.13727995  | 0.001705232 | 0.004093902 |
| Stc2          | 169.2489347 | -5.123566461 | 0.47458061  | -10.79598776 | 3.60E-27    | 9.98E-26    |
| Plau          | 273.0687888 | -5.124168758 | 0.482247443 | -10.62560068 | 2.27E-26    | 5.89E-25    |
| Ms4a6c        | 368.611455  | -5.127590032 | 0.32386762  | -15.83236394 | 1.86E-56    | 3.69E-54    |
| Rims2         | 72.06236302 | -5.128533086 | 0.791144359 | -6.482423877 | 9.03E-11    | 5.94E-10    |
| Ighv2-2       | 5.620302102 | -5.130070674 | 1.615839289 | -3.174864424 | 0.001499065 | 0.003642021 |
| Tmem121       | 11.0311047  | -5.131957094 | 1.446643559 | -3.547492443 | 0.000388917 | 0.001059654 |
| Nme5          | 13.36968269 | -5.132216247 | 1.355931734 | -3.785010793 | 0.000153702 | 0.000450316 |
| Gm21188       | 125.9759136 | -5.134091427 | 0.650713883 | -7.88993682  | 3.02E-15    | 3.16E-14    |
| Ms4a14        | 59.83263695 | -5.138783071 | 0.705436806 | -7.284540619 | 3.23E-13    | 2.77E-12    |
| Psat1         | 362.2575708 | -5.148168625 | 0.535771657 | -9.608885727 | 7.33E-22    | 1.36E-20    |
| Spon1         | 271.9063305 | -5.149068764 | 0.449312049 | -11.4598947  | 2.10E-30    | 7.64E-29    |
| Gpr34         | 62.15377077 | -5.155911925 | 0.666213599 | -7.739127405 | 1.00E-14    | 9.96E-14    |
| Gal3st4       | 5.751267589 | -5.160500976 | 1.374679723 | -3.753966025 | 0.000174058 | 0.000505769 |
| Efna4         | 51.36980825 | -5.161181721 | 0.755997274 | -6.826984565 | 8.67E-12    | 6.40E-11    |
| Tpsb2         | 5.70531508  | -5.164616108 | 1.778701258 | -2.90358827  | 0.00368913  | 0.00825358  |
| Gm28700       | 11.24530368 | -5.16740224  | 1.503476252 | -3.436969644 | 0.000588262 | 0.001552908 |
| Syng1         | 111.0573696 | -5.16940767  | 0.66096866  | -7.8209573   | 5.24E-15    | 5.35E-14    |
| 1700016C15Rik | 11.58920406 | -5.169665863 | 1.378500686 | -3.750209133 | 0.000176687 | 0.000512447 |
| Kif4          | 74.06186714 | -5.18079121  | 0.735951208 | -7.039585168 | 1.93E-12    | 1.53E-11    |
| Foxj1         | 285.0994519 | -5.18212525  | 0.566484157 | -9.147873213 | 5.81E-20    | 9.20E-19    |
| B020017C02Rik | 5.886525741 | -5.190029638 | 1.560420043 | -3.326046511 | 0.000880872 | 0.002250283 |
| Gzmc          | 5.800686809 | -5.196081373 | 1.392875422 | -3.730471003 | 0.000191122 | 0.000550996 |
| Lrrc3b        | 5.914965343 | -5.206854605 | 1.710561917 | -3.043943954 | 0.002334986 | 0.005446278 |
| Ier3          | 314.2079448 | -5.212411981 | 0.450258315 | -11.57649244 | 5.42E-21    | 2.05E-29    |
| Gm9733        | 6.02845449  | -5.221460568 | 1.360404229 | -3.838168432 | 0.000123955 | 0.000368473 |
| AU0158336     | 27.61947771 | -5.221808866 | 1.197799763 | -4.359500669 | 1.30E-05    | 4.51E-05    |
| Csrnp3        | 29.73885882 | -5.223848727 | 1.04682485  | -4.990184104 | 6.03E-07    | 2.50E-06    |
| Zfp185        | 117.5243564 | -5.229358153 | 0.676905585 | -7.725387804 | 1.12E-14    | 1.10E-13    |
| Sema7a        | 62.45288115 | -5.242361267 | 0.650570035 | -8.058104406 | 7.75E-16    | 8.58E-15    |
| Sult2b1       | 42.5586059  | -5.251935085 | 0.780365382 | -6.730097472 | 1.70E-11    | 1.21E-10    |
| Cbr2          | 15.50704814 | -5.254699564 | 1.271220875 | -4.13358502  | 3.57E-05    | 0.000115952 |
| Lox           | 106.9670394 | -5.258426778 | 0.62347587  | -8.434050187 | 3.34E-17    | 4.21E-16    |
| Myof          | 1192.263593 | -5.26020179  | 0.386637706 | -13.60498914 | 3.74E-42    | 3.34E-40    |
| Sox4          | 1261.680481 | -5.264575867 | 0.272267561 | -19.33603784 | 2.67E-83    | 3.25E-80    |
| Cbr3          | 276.4543285 | -5.264608923 | 0.434840827 | -12.10697937 | 9.70E-34    | 4.54E-32    |
| Cd300ld5      | 6.198692797 | -5.271122943 | 1.666946526 | -3.162142792 | 0.001566127 | 0.003790366 |
| Gm44911       | 6.239555746 | -5.271287865 | 1.672108497 | -3.152479564 | 0.001618902 | 0.003908658 |
| Igkv4-59      | 6.155995848 | -5.271462253 | 1.392857091 | -3.784639707 | 0.000153931 | 0.00045082  |
| Scd2          | 2974.489653 | -5.275472127 | 0.289120451 | -18.24662387 | 2.20E-74    | 1.44E-71    |
| Sult2a5       | 6.264823854 | -5.280885605 | 1.809303427 | -2.918739624 | 0.003514496 | 0.007894997 |
| Clec4d        | 23.64131193 | -5.283907607 | 1.148174007 | -4.602009428 | 4.18E-06    | 1.56E-05    |
| Cfap221       | 11.78302072 | -5.28489734  | 1.374702586 | -3.844393249 | 0.000120851 | 0.000359684 |
| H2-Q3         | 6.251174719 | -5.289398333 | 1.599032093 | -3.307875029 | 0.000940067 | 0.002384594 |
| Wnt11         | 12.40619039 | -5.321841976 | 1.279985378 | -4.157736538 | 3.21E-05    | 0.000104931 |
| Igkv8-21      | 6.316517773 | -5.322104185 | 1.537944356 | -3.460531041 | 0.000539111 | 0.001432476 |
| Ighv6-3       | 6.392402163 | -5.327327868 | 1.515124359 | -3.516099411 | 0.000437937 | 0.001181882 |
| Bex3          | 586.1361431 | -5.328143904 | 0.442562063 | -12.0393146  | 2.21E-33    | 9.90E-32    |
| Lyz1          | 12.61274716 | -5.329761946 | 1.300162592 | -4.099304178 | 4.14E-05    | 0.000133068 |
| Vat1l         | 6.479180829 | -5.333895104 | 1.660786369 | -3.211668402 | 0.001319666 | 0.003251108 |
| Inhbb         | 250.7659247 | -5.337237703 | 0.517872135 | -10.30609168 | 6.61E-25    | 1.55E-23    |
| Ps1           | 230.6627297 | -5.338206375 | 0.48355154  | -11.03958097 | 2.46E-28    | 7.48E-27    |
| Ighv1-55      | 6.349090679 | -5.341026783 | 1.433829468 | -3.725008379 | 0.000195309 | 0.000562151 |
| Tff3          | 628.6494996 | -5.341813859 | 1.154890881 | -4.625384047 | 3.74E-06    | 1.40E-05    |
| Ager          | 213.1790177 | -5.349952362 | 0.649021425 | -8.243105934 | 1.68E-16    | 1.97E-15    |
| Lct           | 7.372697287 | -5.354080286 | 1.680837151 | -3.185365271 | 0.001445714 | 0.003528494 |
| Ighv1-53      | 13.02067309 | -5.356372853 | 1.339596774 | -3.99849638  | 6.37E-05    | 0.00019871  |

|           |             |              |             |              |             |             |
|-----------|-------------|--------------|-------------|--------------|-------------|-------------|
| Shc4      | 24.27873298 | -5.357623423 | 1.075429979 | -4.981843103 | 6.30E-07    | 2.60E-06    |
| Gm49146   | 6.639169744 | -5.360376238 | 1.629257218 | -3.290073647 | 0.001001612 | 0.002524464 |
| Tmem145   | 13.67880984 | -5.366398429 | 1.405813992 | -3.817289101 | 0.000134926 | 0.000398997 |
| Stc1      | 59.89277784 | -5.376088037 | 0.765412461 | -7.023779086 | 2.16E-12    | 1.70E-11    |
| Ccl17     | 6.590805078 | -5.380954841 | 1.397522155 | -3.850353872 | 0.000117947 | 0.000351717 |
| Ighv9-3   | 13.22489393 | -5.386861291 | 1.442739868 | -3.733771702 | 0.000188633 | 0.000544501 |
| Pcdhga6   | 6.812399052 | -5.387784708 | 1.439283154 | -3.74338065  | 0.000181561 | 0.000524885 |
| Rragd     | 987.2012099 | -5.398080763 | 0.310615126 | -17.37867965 | 1.20E-67    | 4.53E-65    |
| Greb1     | 128.5451948 | -5.403712614 | 0.815219103 | -6.62854022  | 3.39E-11    | 2.33E-10    |
| Scnn1g    | 13.41168821 | -5.40377681  | 1.587068546 | -3.404879281 | 0.000661933 | 0.001725743 |
| Apln      | 49.08537544 | -5.406128826 | 0.874612475 | -6.181170494 | 6.36E-10    | 3.78E-09    |
| Cbx3-ps8  | 6.887484879 | -5.415052708 | 1.53534046  | -3.526939367 | 0.000420393 | 0.001138639 |
| Gm10146   | 6.854562625 | -5.415755978 | 3.538525054 | -1.53051226  | 0.125889981 | 0.187783043 |
| Cd33      | 333.2347987 | -5.416786216 | 0.352212878 | -15.37929631 | 2.25E-53    | 3.83E-51    |
| Tbx1      | 47.77851029 | -5.420428108 | 0.976716335 | -5.549644166 | 2.86E-08    | 1.40E-07    |
| Fam174b   | 997.4207451 | -5.425054451 | 0.307318494 | -17.65287333 | 9.67E-70    | 4.02E-67    |
| Igkv1-117 | 36.89633654 | -5.428395784 | 0.959717278 | -5.656244715 | 1.55E-08    | 7.83E-08    |
| Kcnu1     | 6.980249752 | -5.431426846 | 1.364298239 | -3.981114021 | 6.86E-05    | 0.000212807 |
| Cd14      | 467.9975186 | -5.431628452 | 0.293390579 | -18.51330218 | 1.61E-76    | 1.25E-73    |
| Asz1      | 17.6021455  | -5.432270785 | 1.29148154  | -4.206231847 | 2.60E-05    | 8.60E-05    |
| Ccn2      | 3234.836601 | -5.433218815 | 0.730825144 | -7.43436219  | 1.05E-13    | 9.48E-13    |
| Ccnj      | 49.37907714 | -5.434505698 | 0.785914841 | -6.914878579 | 4.68E-12    | 3.56E-11    |
| Ak5       | 16.5445736  | -5.438109963 | 1.368890745 | -3.972639879 | 7.11E-05    | 0.000220084 |
| Ighg2b    | 155.5070022 | -5.438154249 | 0.638770813 | -8.51346702  | 1.69E-17    | 2.19E-16    |
| Baiap2l2  | 49.33782706 | -5.446459773 | 1.406196638 | -3.873185034 | 0.000107422 | 0.000323158 |
| Mogat2    | 84.23878958 | -5.448102634 | 0.863755255 | -6.307461058 | 2.84E-10    | 1.76E-09    |
| Ptges3-ps | 7.115476089 | -5.469091839 | 3.104830422 | -1.761478437 | 0.078157459 | 0.124689161 |
| Ahnak2    | 214.0427213 | -5.472031712 | 0.526388828 | -10.39541764 | 2.60E-25    | 6.26E-24    |
| Iglv1     | 51.77988369 | -5.472204967 | 0.865941724 | -6.31936863  | 2.63E-10    | 1.63E-09    |
| Igkv10-94 | 6.986854413 | -5.472507696 | 1.475211912 | -3.709641749 | 0.000207553 | 0.000594382 |
| Ighv1-9   | 7.137958394 | -5.477102999 | 1.407774116 | -3.890612093 | 1.00E-04    | 0.000302393 |
| Mcub      | 29.36977222 | -5.485875327 | 1.070598571 | -5.124119791 | 2.99E-07    | 1.29E-06    |
| Arsi      | 7.191077783 | -5.487302194 | 1.350511425 | -4.063129043 | 4.84E-05    | 0.000153773 |
| Tcf24     | 476.2766412 | -5.488054873 | 0.468769093 | -11.70737353 | 1.17E-31    | 4.66E-30    |
| Clec5a    | 56.18022031 | -5.495026733 | 0.7964917   | -6.899038283 | 5.24E-12    | 3.96E-11    |
| Glis2     | 850.5154448 | -5.496993096 | 0.294300128 | -18.67818791 | 7.45E-78    | 6.35E-75    |
| Usp43     | 146.4220419 | -5.498034585 | 0.570257701 | -9.641315797 | 5.35E-22    | 1.00E-20    |
| Ighv1-64  | 14.31260635 | -5.500634146 | 1.265449622 | -4.346782402 | 1.38E-05    | 4.77E-05    |
| Krt7      | 1095.069409 | -5.507917018 | 0.759219866 | -7.254706132 | 4.03E-13    | 3.42E-12    |
| P2rx2     | 26.86480003 | -5.516828654 | 1.13411263  | -4.864445127 | 1.15E-06    | 4.60E-06    |
| M54a7     | 335.6444588 | -5.521960725 | 0.394237171 | -14.0066973  | 1.42E-44    | 1.46E-42    |
| Cd109     | 14.50104333 | -5.527767418 | 1.262119976 | -4.379747981 | 1.19E-05    | 4.14E-05    |
| Ska3      | 29.73242746 | -5.530870639 | 1.131960756 | -4.886097516 | 1.03E-06    | 4.14E-06    |
| Adamts13  | 21.2160773  | -5.537193146 | 1.138613733 | -4.863100616 | 1.16E-06    | 4.63E-06    |
| Cd300ld3  | 28.65848262 | -5.560464027 | 1.118398314 | -4.971810093 | 6.63E-07    | 2.74E-06    |
| Ccl7      | 40.16974333 | -5.56500162  | 1.025782838 | -5.425126463 | 5.79E-08    | 2.73E-07    |
| Tlr9      | 43.57983531 | -5.566048068 | 0.943064177 | -5.902088326 | 3.59E-09    | 1.96E-08    |
| Mettl7a2  | 15.01253    | -5.569055895 | 3.140002366 | -1.773583344 | NA          | NA          |
| H2-Q2     | 337.0512354 | -5.570859998 | 0.451487893 | -12.33889122 | 5.59E-35    | 2.86E-33    |
| Akr1b7    | 154.8899777 | -5.578498184 | 0.516719559 | -10.79598805 | 3.60E-27    | 9.98E-26    |
| Clrn3     | 7.666472235 | -5.579602851 | 3.538019139 | -1.577041455 | 0.114785987 | 0.173820528 |
| Ighj4     | 7.941545776 | -5.584446571 | 1.397473417 | -3.996102182 | 6.44E-05    | 0.000200583 |
| Fgf16     | 7.829396615 | -5.604830429 | 1.435423528 | -3.904652751 | 9.44E-05    | 0.000286647 |
| Gm8325    | 7.890524955 | -5.611809127 | 1.747188157 | -3.211908863 | 0.001318562 | 0.003250267 |
| Gm45234   | 7.854062701 | -5.612975166 | 3.091911293 | -1.815373934 | 0.069466464 | 0.112423038 |
| Lcn2      | 11268.34009 | -5.619009436 | 0.701555317 | -8.009360493 | 1.15E-15    | 1.26E-14    |
| Spire2    | 86.25944066 | -5.620880825 | 0.672038557 | -8.363926096 | 6.07E-17    | 7.44E-16    |
| Lrrc9     | 7.768142327 | -5.637845417 | 1.394350911 | -4.043347606 | 5.27E-05    | 0.000166232 |
| Ccl8      | 28.12962147 | -5.638070579 | 1.19334016  | -4.724613122 | 2.31E-06    | 8.83E-06    |
| Phactr3   | 7.926367866 | -5.648136304 | 1.548766479 | -3.646861151 | 0.000265463 | 0.000745278 |
| Hmgcl1    | 61.55056546 | -5.650562065 | 0.901213247 | -6.269950074 | 3.61E-10    | 2.21E-09    |
| Cyp2c65   | 28.32742853 | -5.664568239 | 1.2778402   | -4.432923801 | 9.30E-06    | 3.30E-05    |
| Tmem252   | 28.48683368 | -5.666921457 | 1.272723153 | -4.452595559 | 8.48E-06    | 3.02E-05    |
| Foxd2     | 8.263152228 | -5.678317203 | 1.417585959 | -4.005624609 | 6.19E-05    | 0.000193129 |
| Plcb4     | 1088.650398 | -5.681732424 | 0.502559639 | -11.30558841 | 1.23E-29    | 4.20E-28    |
| Lif       | 101.4865956 | -5.691470642 | 0.609074513 | -9.344457076 | 9.24E-21    | 1.57E-19    |

|                |             |              |             |              |             |             |
|----------------|-------------|--------------|-------------|--------------|-------------|-------------|
| Lama5          | 3432.2223   | -5.713359836 | 0.334712258 | -17.069467   | 2.50E-65    | 8.21E-63    |
| Trem2          | 367.2394338 | -5.725767938 | 0.352387648 | -16.24849216 | 2.29E-59    | 5.27E-57    |
| Cx3cl1         | 250.8600366 | -5.759976339 | 0.39788225  | -14.47658531 | 1.70E-47    | 2.14E-45    |
| 9930111J21Rik1 | 28.04550284 | -5.760303302 | 1.182134188 | -4.872799856 | 1.10E-06    | 4.41E-06    |
| Madcam1        | 8.557970843 | -5.765990071 | 1.580199965 | -3.648899001 | 0.000263367 | 0.00074017  |
| Mroh3          | 12.07663584 | -5.80203022  | 1.311057304 | -4.425458903 | 9.62E-06    | 3.41E-05    |
| Aplnr          | 42.22625432 | -5.809150115 | 1.18240412  | -4.912998879 | 8.97E-07    | 3.64E-06    |
| Igkv10-96      | 32.00671855 | -5.821505481 | 1.229708    | -4.734055143 | 2.20E-06    | 8.45E-06    |
| Ddr1           | 1496.961393 | -5.824295942 | 0.337958425 | -17.23376458 | 1.48E-66    | 5.16E-64    |
| Scn7a          | 270.0367954 | -5.827636446 | 0.566448837 | -10.28801909 | 7.98E-25    | 1.86E-23    |
| Scel           | 9.03884709  | -5.839226383 | 1.386598689 | -4.211187009 | 2.54E-05    | 8.43E-05    |
| Tead4          | 235.1272154 | -5.841631851 | 0.48919909  | -11.94314879 | 7.05E-33    | 3.07E-31    |
| Ngp            | 9.089533579 | -5.849337953 | 1.414408996 | -4.135535032 | 3.54E-05    | 0.000115016 |
| Clic6          | 168.5058552 | -5.853356273 | 1.297506039 | -4.511236245 | NA          | NA          |
| Inava          | 164.7630892 | -5.858072173 | 0.577607566 | -10.14195887 | 3.60E-24    | 7.95E-23    |
| Bicc1          | 2744.129485 | -5.865333911 | 0.283299977 | -20.70361591 | 3.21E-95    | 7.83E-92    |
| Pcdhga5        | 9.503562194 | -5.873833877 | 1.312127036 | -4.476574077 | 7.59E-06    | 2.73E-05    |
| Tent5b         | 49.1014899  | -5.880293009 | 1.125236403 | -5.225828985 | 1.73E-07    | 7.77E-07    |
| Foxg1          | 26.58763653 | -5.883650065 | 1.485528838 | -3.960643452 | 7.47E-05    | 0.000230643 |
| A2m            | 114.7739425 | -5.884847863 | 0.723113327 | -8.138209662 | 4.01E-16    | 4.56E-15    |
| Igkv6-23       | 9.445124336 | -5.892498207 | 1.38797653  | -4.245387498 | 2.18E-05    | 7.31E-05    |
| Gm2832         | 9.616172829 | -5.893831319 | 1.471505358 | -4.005307415 | 6.19E-05    | 0.000193353 |
| Ttc22          | 66.3903887  | -5.906913024 | 0.908629507 | -6.500903808 | 7.98E-11    | 5.29E-10    |
| Ypel4          | 65.46483354 | -5.910950775 | 0.785198558 | -7.527969473 | 5.15E-14    | 4.81E-13    |
| Igkv4-57       | 9.551072711 | -5.919124039 | 1.388583605 | -4.262706271 | 2.02E-05    | 6.80E-05    |
| Parm1          | 121.1297325 | -5.923853235 | 0.652563553 | -9.077818109 | 1.11E-19    | 1.71E-18    |
| Rrad           | 19.04281113 | -5.930504331 | 1.252081414 | -4.736516543 | 2.17E-06    | 8.37E-06    |
| Igkv12-44      | 9.686751695 | -5.934255025 | 1.325736288 | -4.476195666 | 7.60E-06    | 2.73E-05    |
| Fstl3          | 380.9959424 | -5.940983935 | 0.48332341  | -12.29194327 | 1.00E-34    | 5.02E-33    |
| Mmp24          | 19.39978768 | -5.941133627 | 1.3626293   | -4.360051284 | 1.30E-05    | 4.50E-05    |
| Prrg4          | 118.633611  | -5.960413068 | 0.622125797 | -9.580719998 | 9.64E-22    | 1.78E-20    |
| Iglc1          | 90.33582613 | -5.966022154 | 0.779419205 | -7.654445922 | 1.94E-14    | 1.88E-13    |
| Plaur          | 304.1959168 | -5.975016142 | 0.508754986 | -11.74438838 | 7.55E-32    | 3.04E-30    |
| Cx3cr1         | 648.8624053 | -5.979050031 | 0.40942994  | -14.60335322 | 2.67E-48    | 3.53E-46    |
| Mab2114        | 145.2900077 | -5.979942953 | 0.595441561 | -10.04287127 | 9.88E-24    | 2.10E-22    |
| Shisa2         | 179.6857281 | -5.996823445 | 0.557187515 | -10.76266658 | 5.17E-27    | 1.42E-25    |
| 1500009L16Rik  | 10.39929824 | -6.00023211  | 1.482674437 | -4.046897931 | 5.19E-05    | 0.000163914 |
| Ankrd35        | 35.83959195 | -6.007804795 | 1.194391444 | -5.030013257 | 4.90E-07    | 2.06E-06    |
| Ighv5-17       | 10.24325578 | -6.018220053 | 1.364662944 | -4.410041379 | 1.03E-05    | 3.64E-05    |
| Pgr            | 10.33141603 | -6.029608211 | 1.605927251 | -3.75459611  | 0.000173621 | 0.000504671 |
| F13a1          | 141.1805672 | -6.031879412 | 0.720984904 | -8.366166025 | 5.95E-17    | 7.31E-16    |
| Prnd           | 53.43900326 | -6.046565722 | 1.042391399 | -5.80066732  | 6.61E-09    | 3.49E-08    |
| Cubn           | 10.6523041  | -6.052159286 | 1.474788501 | -4.10374727  | 4.07E-05    | 0.000130635 |
| Ighv1-81       | 10.85559115 | -6.089964973 | 1.518260588 | -4.011146058 | 6.04E-05    | 0.000188978 |
| Cacna1b        | 35.33199627 | -6.092301815 | 1.255650671 | -4.851908224 | 1.22E-06    | 4.87E-06    |
| Hs6st2         | 21.25466706 | -6.102744504 | 1.29807227  | -4.701390396 | 2.58E-06    | 9.86E-06    |
| Acp7           | 11.14535458 | -6.109032645 | 2.6358768   | -2.31764726  | 0.020468499 | 0.038362685 |
| Cdh17          | 21.89970248 | -6.116243104 | 1.34522658  | -4.546626714 | 5.45E-06    | 2.00E-05    |
| Ighv1-15       | 11.11258321 | -6.121234785 | 1.26666408  | -4.832563644 | 1.35E-06    | 5.35E-06    |
| Scn9a          | 11.07367029 | -6.12231215  | 1.369468303 | -4.470576017 | 7.80E-06    | 2.80E-05    |
| Tenm4          | 125.2443326 | -6.134371064 | 0.845623014 | -7.254262197 | 4.04E-13    | 3.43E-12    |
| Sh2d1b1        | 40.60068152 | -6.152185495 | 1.106599159 | -5.5595429   | 2.70E-08    | 1.33E-07    |
| Fam78b         | 11.58339341 | -6.161972537 | 1.27153594  | -4.846086017 | 1.26E-06    | 5.01E-06    |
| Cdh6           | 410.2907855 | -6.180855194 | 0.511747864 | -12.07793062 | 1.38E-33    | 6.35E-32    |
| Fa2h           | 24.76173226 | -6.187861369 | 1.282480325 | -4.824917191 | 1.40E-06    | 5.54E-06    |
| Kcnh8          | 11.64454533 | -6.189039347 | 1.307178532 | -4.734654982 | 2.19E-06    | 8.43E-06    |
| Bcl2a1b        | 148.8867923 | -6.200411588 | 0.605305563 | -10.24344061 | 1.27E-24    | 2.89E-23    |
| Gm14685        | 42.03689215 | -6.211603879 | 1.172590331 | -5.297335065 | 1.18E-07    | 5.35E-07    |
| Fmo3           | 103.1190512 | -6.213686451 | 0.828701556 | -7.498099172 | 6.47E-14    | 5.96E-13    |
| Phgdh          | 334.1793667 | -6.231954172 | 0.527703398 | -11.8095775  | 3.48E-32    | 1.46E-30    |
| Tedc1          | 64.14491495 | -6.235916683 | 0.843142824 | -7.396038375 | 1.40E-13    | 1.25E-12    |
| Slc4a9         | 338.4395552 | -6.248411976 | 0.54324643  | -11.50198442 | 1.29E-30    | 4.77E-29    |
| Sult2a2        | 109.1886677 | -6.250199911 | 0.929170664 | -6.726643614 | 1.74E-11    | 1.23E-10    |
| Asb15          | 12.26771955 | -6.251557054 | 1.310034818 | -4.772054124 | 1.82E-06    | 7.09E-06    |
| Fosl1          | 12.42922807 | -6.263481381 | 1.276733456 | -4.905864534 | 9.30E-07    | 3.77E-06    |
| Ccl12          | 46.15553662 | -6.264606422 | 1.188257235 | -5.272096173 | 1.35E-07    | 6.10E-07    |



|          |             |              |             |              |             |             |
|----------|-------------|--------------|-------------|--------------|-------------|-------------|
| Sema3e   | 85.89240645 | -6.275298458 | 0.880104525 | -7.130174064 | 1.00E-12    | 8.21E-12    |
| Cnr1     | 67.09878593 | -6.276419773 | 0.971689618 | -6.459284585 | 1.05E-10    | 6.85E-10    |
| Slc5a9   | 41.19373383 | -6.277610861 | 1.723818216 | -3.641689595 | 0.000270855 | 0.000759337 |
| Aoc1     | 54.88864651 | -6.279158922 | 1.099361735 | -5.71164042  | 1.12E-08    | 5.76E-08    |
| Ighv3-6  | 12.74900737 | -6.33584695  | 1.360601425 | -4.656651709 | 3.21E-06    | 1.21E-05    |
| Gm49450  | 12.97407656 | -6.337205448 | 3.536303445 | -1.792042325 | 0.073126186 | 0.117575707 |
| AA467197 | 12.82699371 | -6.342972437 | 1.328837464 | -4.773324508 | 1.81E-06    | 7.05E-06    |
| Rapsn    | 13.16442807 | -6.354125955 | 1.27493005  | -4.983901629 | 6.23E-07    | 2.58E-06    |
| Mchr1    | 12.97857646 | -6.35552016  | 1.333191262 | -4.767171969 | 1.87E-06    | 7.25E-06    |
| Tinag    | 98.98556429 | -6.372562022 | 0.891703034 | -7.146507053 | 8.90E-13    | 7.32E-12    |
| Fgd3     | 1238.973816 | -6.391527924 | 0.413475812 | -15.45804552 | 6.66E-54    | 1.18E-51    |
| Shc2     | 365.6740952 | -6.398132127 | 0.443041371 | -14.44138752 | 2.84E-47    | 3.46E-45    |
| Igha     | 1812.738961 | -6.407178621 | 0.447008217 | -14.33346945 | 1.35E-46    | 1.58E-44    |
| Myo7b    | 47.83057185 | -6.412198393 | 1.181489822 | -5.427214246 | 5.72E-08    | 2.70E-07    |
| Rad54l   | 33.8133246  | -6.419925916 | 1.091010136 | -5.884387052 | 4.00E-09    | 2.17E-08    |
| Ighg1    | 76.87648018 | -6.424717207 | 1.292399534 | -4.971154072 | NA          | NA          |
| Fcrls    | 127.4095163 | -6.435441974 | 0.747182169 | -8.612949079 | 7.12E-18    | 9.53E-17    |
| Ggt1     | 198.9737882 | -6.441324007 | 1.266322531 | -5.086637762 | 3.64E-07    | 1.56E-06    |
| Chl1     | 14.12963886 | -6.441611176 | 1.362102707 | -4.729167002 | 2.25E-06    | 8.65E-06    |
| Igshf9   | 576.1160922 | -6.447781807 | 0.409073227 | -15.76192569 | 5.69E-56    | 1.09E-53    |
| Ighv1-72 | 13.99524422 | -6.459199686 | 1.489029441 | -4.33785895  | 1.44E-05    | 4.96E-05    |
| Timp1    | 129.4289008 | -6.467680898 | 0.725512014 | -8.914643414 | 4.89E-19    | 7.20E-18    |
| Klh13    | 5161.588003 | -6.469094202 | 0.286244448 | -22.59989405 | 4.34E-113   | 1.48E-109   |
| Gm9949   | 14.4257743  | -6.498230355 | 1.260496455 | -5.155294431 | 2.53E-07    | 1.11E-06    |
| Cdkn2a   | 29.06715874 | -6.506264133 | 1.292479163 | -5.033941218 | 4.80E-07    | 2.02E-06    |
| AA414768 | 156.4467211 | -6.514102877 | 0.699783349 | -9.308742322 | 1.29E-20    | 2.16E-19    |
| Havcr2   | 80.04783748 | -6.517182226 | 0.890031483 | -7.322417636 | 2.44E-13    | 2.12E-12    |
| Mmp3     | 14.89863076 | -6.532170597 | 1.649027782 | -3.961225317 | NA          | NA          |
| Ccr1     | 166.7161338 | -6.583850426 | 0.718378252 | -9.164879928 | 4.96E-20    | 7.93E-19    |
| Plppr1   | 54.8569415  | -6.622564414 | 1.281150046 | -5.16923403  | 2.35E-07    | 1.03E-06    |
| Adcy1    | 415.4733468 | -6.640520731 | 0.500356157 | -13.27158793 | 3.38E-40    | 2.56E-38    |
| Kcnh2    | 45.57914764 | -6.65080958  | 1.263582449 | -5.263455173 | 1.41E-07    | 6.37E-07    |
| Gal3st2  | 139.2915147 | -6.68284103  | 1.049694877 | -6.366460557 | 1.93E-10    | 1.22E-09    |
| Arnt2    | 56.57382586 | -6.694929847 | 1.223355123 | -5.472597223 | 4.43E-08    | 2.12E-07    |
| Lrrc55   | 16.95636575 | -6.727264292 | 1.482244082 | -4.538567145 | 5.66E-06    | 2.07E-05    |
| Akr1c18  | 124.8157271 | -6.741590083 | 0.964138905 | -6.992343168 | 2.70E-12    | 2.10E-11    |
| Sfrp5    | 94.01431859 | -6.761398014 | 1.045115694 | -6.469521083 | 9.83E-11    | 6.43E-10    |
| Cxcl17   | 17.54694605 | -6.77156709  | 1.408274272 | -4.808414969 | 1.52E-06    | 5.97E-06    |
| Sult2a1  | 34.62585793 | -6.782799514 | 1.358551483 | -4.992670206 | 5.96E-07    | 2.47E-06    |
| Fbn2     | 93.73269203 | -6.788258947 | 0.892683208 | -7.604331394 | 2.86E-14    | 2.73E-13    |
| Wnt7a    | 17.78670818 | -6.800194157 | 1.404969167 | -4.840102059 | 1.30E-06    | 5.16E-06    |
| BC016579 | 35.20374551 | -6.821242389 | 1.333385848 | -5.115730305 | 3.13E-07    | 1.35E-06    |
| Wfdc3    | 239.464999  | -6.825660782 | 0.725319452 | -9.410558013 | 4.94E-21    | 8.54E-20    |
| Chil3    | 158.8255552 | -6.879998797 | 1.145129473 | -6.008053201 | 1.88E-09    | 1.06E-08    |
| Hao2     | 98.9243623  | -6.892873517 | 1.056611024 | -6.523567673 | 6.87E-11    | 4.59E-10    |
| Melft    | 72.69960656 | -6.905897686 | 1.655458235 | -4.171592821 | 3.02E-05    | 9.91E-05    |
| Fam83b   | 112.5265976 | -6.928757569 | 0.962257158 | -7.200544713 | 6.00E-13    | 5.03E-12    |
| Prss37   | 19.66067717 | -6.936979175 | 1.369679219 | -5.064674325 | 4.09E-07    | 1.73E-06    |
| Vmn2r3   | 20.52637432 | -6.994251096 | 1.358645448 | -5.147959025 | 2.63E-07    | 1.15E-06    |
| Syt14    | 90.63497115 | -7.027301769 | 1.042897157 | -6.738250003 | 1.60E-11    | 1.14E-10    |
| Sirpb1c  | 79.922517   | -7.048327047 | 1.087037305 | -6.483978989 | 8.93E-11    | 5.88E-10    |
| Arhgap22 | 308.6169985 | -7.049333509 | 0.555237691 | -12.69606445 | 6.22E-37    | 3.66E-35    |
| Cfap44   | 139.1622918 | -7.05211267  | 0.969896725 | -7.270993385 | 3.57E-13    | 3.05E-12    |
| Ccl2     | 814.5096892 | -7.096478733 | 0.753787287 | -9.414431443 | 4.76E-21    | 8.27E-20    |
| Sapcd2   | 22.15738054 | -7.101066483 | 1.288011649 | -5.513200512 | 3.52E-08    | 1.71E-07    |
| DXBay18  | 22.52766641 | -7.133857185 | 1.347391626 | -5.294568446 | 1.19E-07    | 5.42E-07    |
| Gm16011  | 165.1954625 | -7.176946304 | 0.84574046  | -8.48599144  | 2.14E-17    | 2.75E-16    |
| Krt20    | 23.24548138 | -7.1883303   | 1.383987694 | -5.193926456 | 2.06E-07    | 9.14E-07    |
| Hsd3b1   | 23.4939671  | -7.198315034 | 1.541968832 | -4.668262345 | 3.04E-06    | 1.15E-05    |
| Ankr1    | 1386.277946 | -7.209112589 | 0.531595406 | -13.56127706 | 6.79E-42    | 5.88E-40    |
| Gm48499  | 23.75163376 | -7.217169222 | 1.498965503 | -4.814766722 | 1.47E-06    | 5.81E-06    |
| Fjx1     | 173.8327196 | -7.246193428 | 0.884184488 | -8.195341047 | 2.50E-16    | 2.89E-15    |
| Vgll3    | 317.6130525 | -7.266081823 | 0.684714559 | -10.61184069 | 2.63E-26    | 6.79E-25    |
| Arxes2   | 49.02619766 | -7.297472931 | 1.244424468 | -5.864134884 | 4.51E-09    | 2.43E-08    |
| Nanp     | 25.47221531 | -7.30038062  | 1.307585821 | -5.58309864  | 2.36E-08    | 1.17E-07    |
| Bex4     | 532.9537701 | -7.30727932  | 0.867424644 | -8.424108509 | NA          | NA          |

|               |             |              |             |                 |          |          |
|---------------|-------------|--------------|-------------|-----------------|----------|----------|
| Mrgprb3       | 27.31151015 | -7.411888348 | 1.284268936 | -5.771289905    | 7.87E-09 | 4.12E-08 |
| Scube3        | 883.0073886 | -7.555152776 | 0.424745675 | -17.78747428    | 8.84E-71 | 3.96E-68 |
| Pak6          | 1141.091256 | -7.635083505 | 0.434870321 | -17.55715011    | 5.24E-69 | 2.03E-66 |
| Pak3          | 145.2667739 | -7.752114762 | 1.36196491  | -5.691860858    | 1.26E-08 | 6.43E-08 |
| Bcl2a1d       | 34.56841007 | -7.754385794 | 1.258560554 | -6.161313229    | 7.21E-10 | 4.26E-09 |
| Shox2         | 34.7666499  | -7.765848102 | 1.252954855 | -6.198027065    | 5.72E-10 | 3.42E-09 |
| Kcnh7         | 219.4569772 | -7.937667962 | 0.782988298 | -10.13765849    | 3.76E-24 | 8.29E-23 |
| Gpc3          | 3354.832016 | -7.971919077 | 0.437180927 | -18.23482815    | 2.73E-74 | 1.72E-71 |
| E330021D16Rik | 40.13577082 | -7.976703546 | 1.276286565 | -6.249931453    | 4.11E-10 | 2.49E-09 |
| Apela         | 284.553881  | -8.030995661 | 1.211299165 | -6.630067858    | 3.36E-11 | 2.31E-10 |
| Lrtm2         | 598.6950794 | -8.064900757 | 0.605364796 | -13.3223815     | 1.72E-40 | 1.33E-38 |
| Bex1          | 1301.976342 | -8.169709069 | 0.84955303  | -9.616479227    | 6.81E-22 | 1.27E-20 |
| Ighg2c        | 93.30831008 | -8.220770081 | 1.312755764 | -6.262223565    | 3.80E-10 | 2.31E-09 |
| Zim1          | 156.4843864 | -8.30129676  | 1.147400611 | -7.234872183    | 4.66E-13 | 3.95E-12 |
| Afp           | 6015.64096  | -8.34523623  | 0.425721068 | -19.60259158    | 1.47E-85 | 2.09E-82 |
| Shbg          | 56.84581212 | -8.47100844  | 1.745941301 | -4.851828888    | 1.22E-06 | 4.87E-06 |
| Ms4a4a        | 74.32127375 | -8.85208511  | 1.20739969  | -7.331528392    | 2.28E-13 | 1.98E-12 |
| Mrgprb2       | 149.3101896 | -8.900716056 | 1.304406998 | -6.823572755    | 8.88E-12 | 6.55E-11 |
| Igf2bp3       | 156.1743428 | -8.975182866 | 1.274104853 | -7.04430475     | 1.86E-12 | 1.48E-11 |
| Ccl20         | 82.64156364 | -9.009062386 | 1.921238487 | -4.68919525     | 2.74E-06 | 1.04E-05 |
| Dlk2          | 84.26846213 | -9.038683162 | 1.276523139 | -7.080704521    | 1.43E-12 | 1.15E-11 |
| Spink1        | 1605.022257 | -9.235644787 | 0.55267157  | -16.71090986    | 1.09E-62 | 3.00E-60 |
| Gm49339       | 102.2600714 | -9.318059437 | 1.203148904 | -7.744726698    | 9.58E-15 | 9.56E-14 |
| Tmem130       | 119.6111016 | -9.544243175 | 1.305908887 | -7.308506183    | 2.70E-13 | 2.34E-12 |
| Arx           | 125.9315529 | -9.614532745 | 1.249770825 | -7.693036634    | 1.44E-14 | 1.41E-13 |
| Fgfbp1        | 818.5579917 | -9.896880623 | 0.922464984 | -10.72873311    | 7.46E-27 | 2.02E-25 |
| Tceal5        | 216.3980227 | -10.40038244 | 1.202123817 | -8.65167323     | 5.07E-18 | 6.86E-17 |
| Igf2          | 35642.7446  | -11.64040971 | 1.043876646 | -11.15113529    | 7.07E-29 | 2.24E-27 |
| Pzca          | 887.0649225 | -12.43349955 | 1.508313991 | -8.243309826    | 1.68E-16 | 1.97E-15 |
| Gm10359       | 103.3830293 | -23.3607764  | 3.534129711 | -6.610050651 NA |          | NA       |
| Gm12671       | 103.3830293 | -23.3607764  | 3.534129711 | -6.610050651 NA |          | NA       |



#### Supplementary Table 4. Human tissue microarray

| <b>Etiology</b> | <b>n</b>  |
|-----------------|-----------|
| HBV             | 13        |
| HCV             | 24        |
| ALD             | 7         |
| NAFLD           | 7         |
| A1AT            | 1         |
| AIH             | 2         |
| PBC             | 1         |
| None            | 2         |
| HBV+HCV         | 1         |
| HBV+NAFLD       | 1         |
| HCV+A1AT        | 1         |
| ALD+HBV         | 1         |
| ALD+NAFLD       | 1         |
| <b>Total</b>    | <b>62</b> |

|       |                               |
|-------|-------------------------------|
| HBV   | Hepatitis B Virus Infection   |
| HCV   | Hepatitis C Virus Infection   |
| ALD   | Alcoholic Liver Disease       |
| NAFLD | Non-alcoholic Liver Disease   |
| A1AT  | Alpha1 Antitrypsin Deficiency |
| AIH   | Autoimmune Hepatitis          |
| PBC   | Primary Biliary Cholangitis   |
